# Supplementary material for: Gene-Metabolite Network Analysis Revealed Tissue-Specific Accumulation of Therapeutic Metabolites in Mallotus japonicus
Source: MDPI journal article supplement (doi:10.3390/ijms22168835), 2021-08-17
Supplement: s1 [file s1]

## PHENYLPROPANOID BIOSYNTHESIS

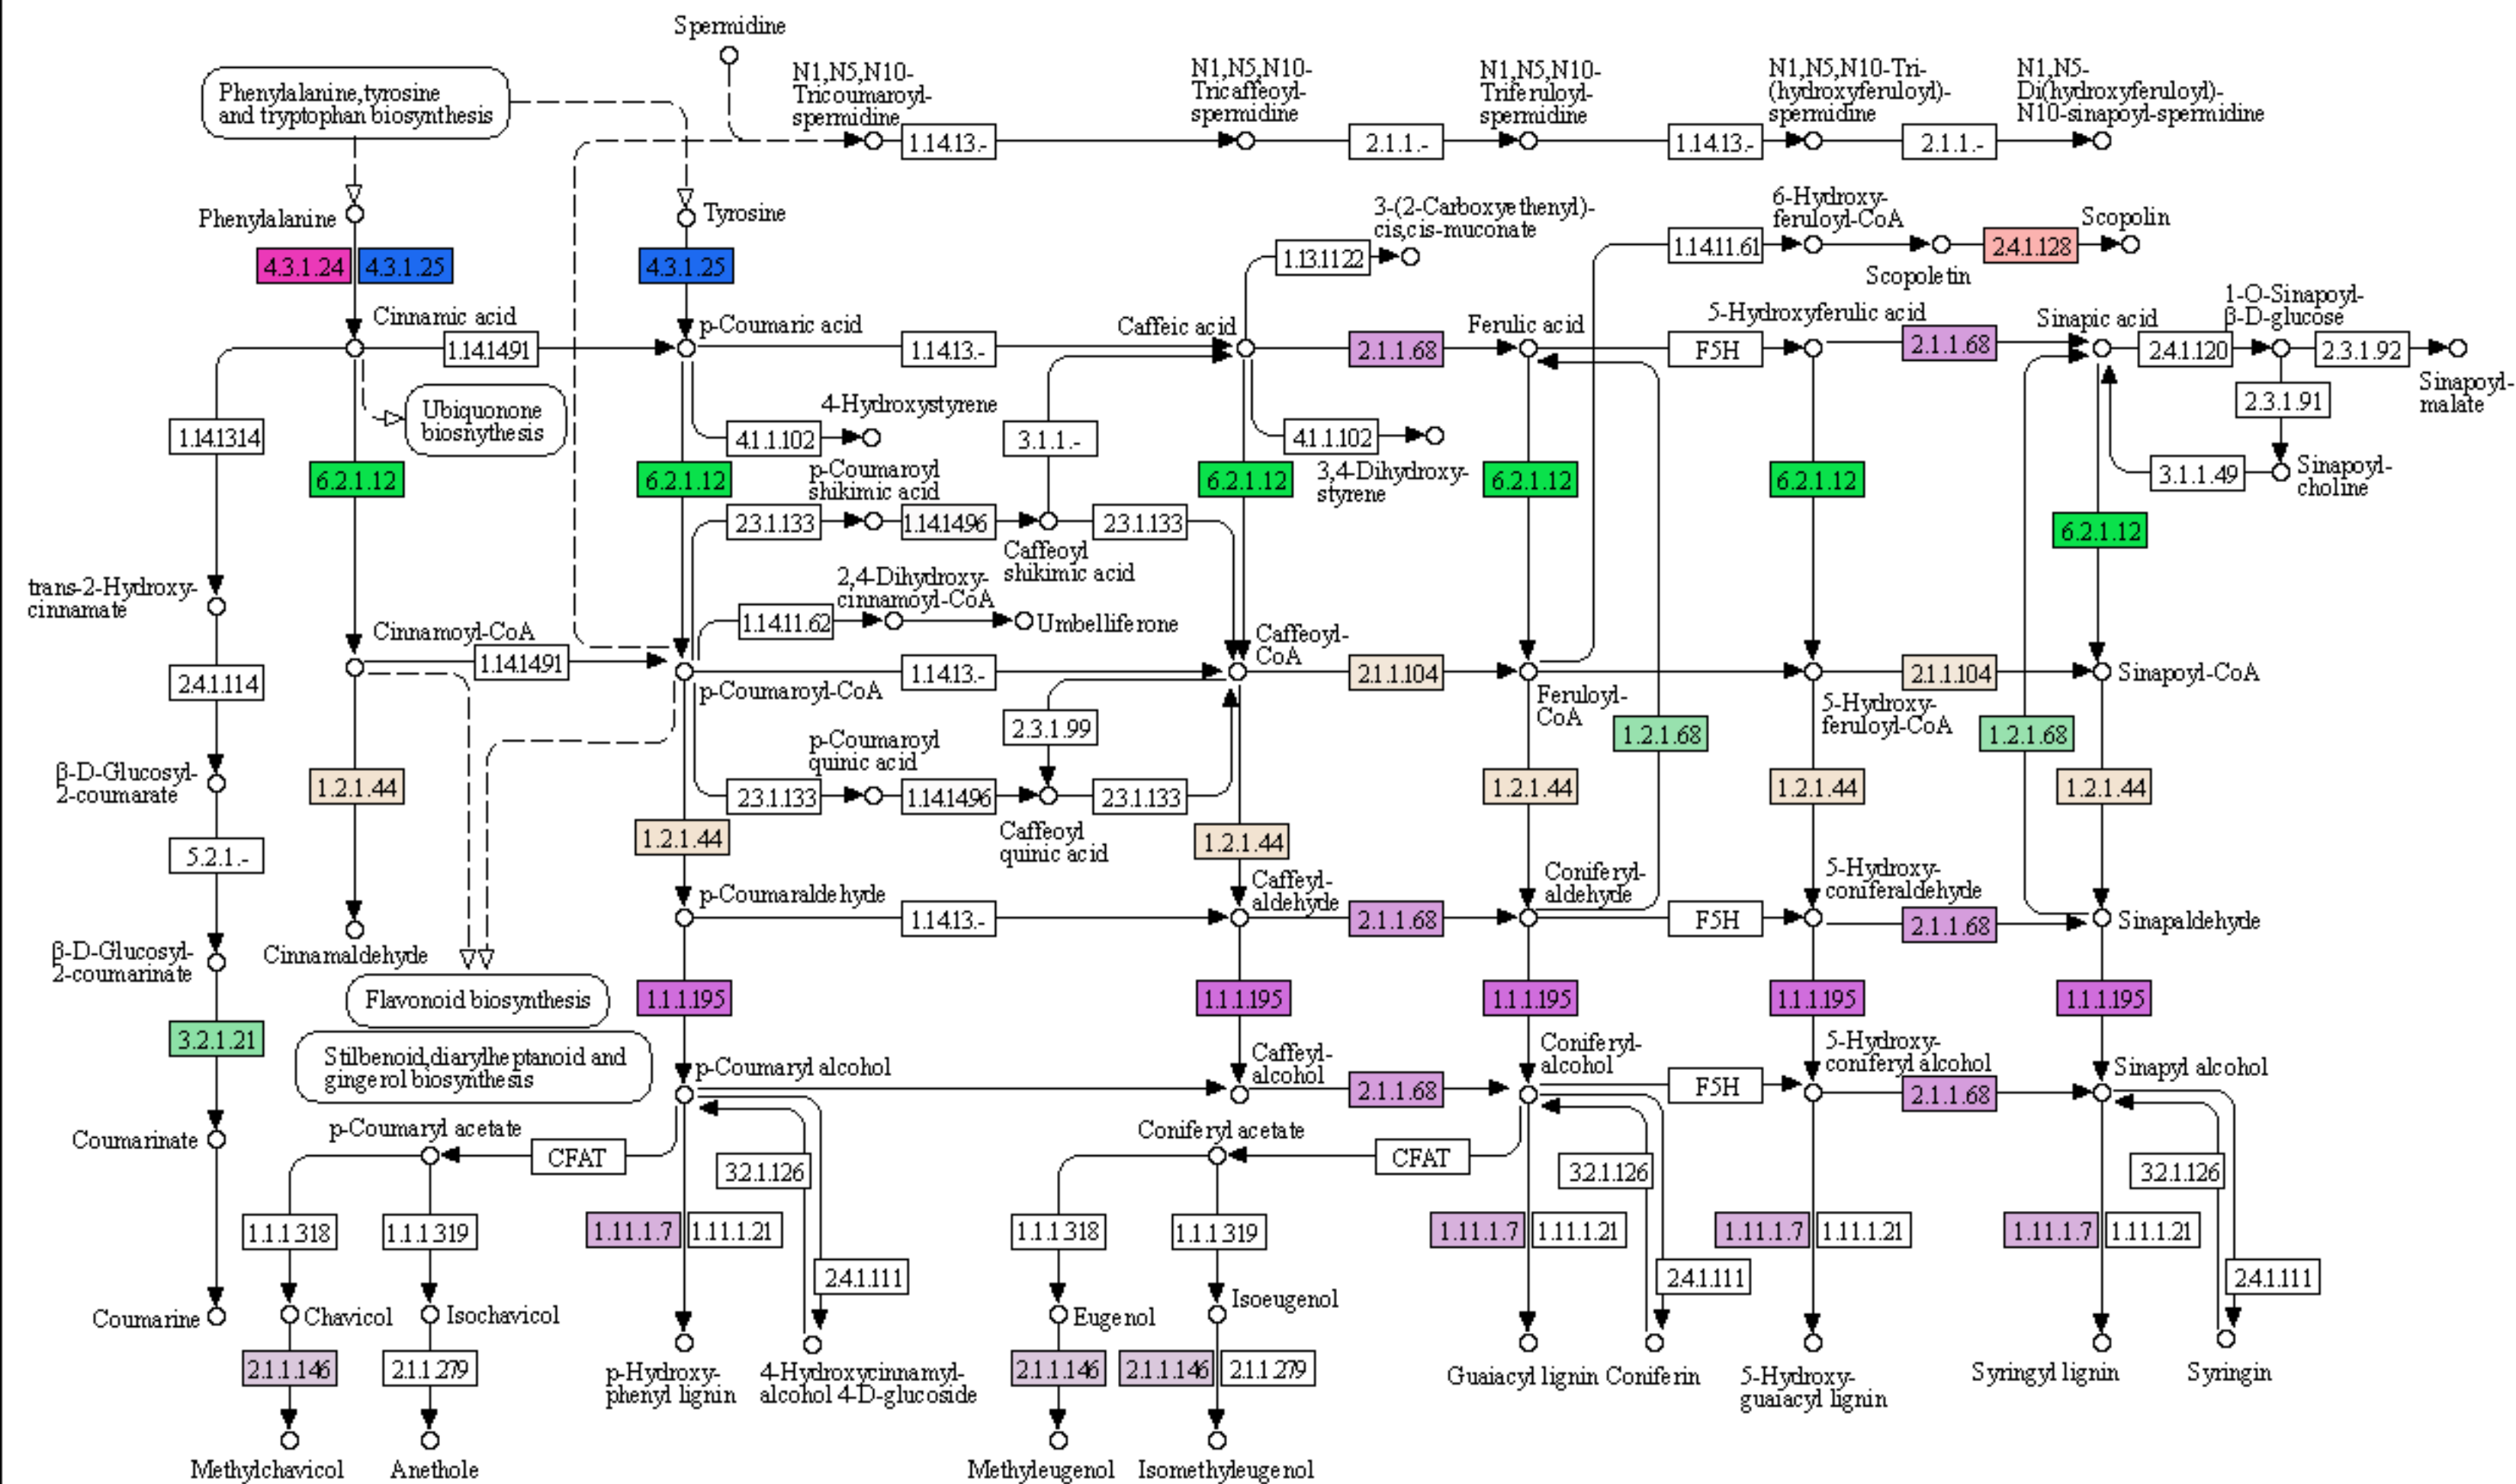

**Figure S6** Representation of phenylpropanoid biosynthesis pathway by the transcripts grouped in TransM4 and TransM9 transcript modules, showing high correlation with metabolite module MetM7.
