# Supplementary material for: Gene-Metabolite Network Analysis Revealed Tissue-Specific Accumulation of Therapeutic Metabolites in Mallotus japonicus
Source: MDPI journal article supplement (doi:10.3390/ijms22168835), 2021-08-17
Supplement: s1 [file s1]

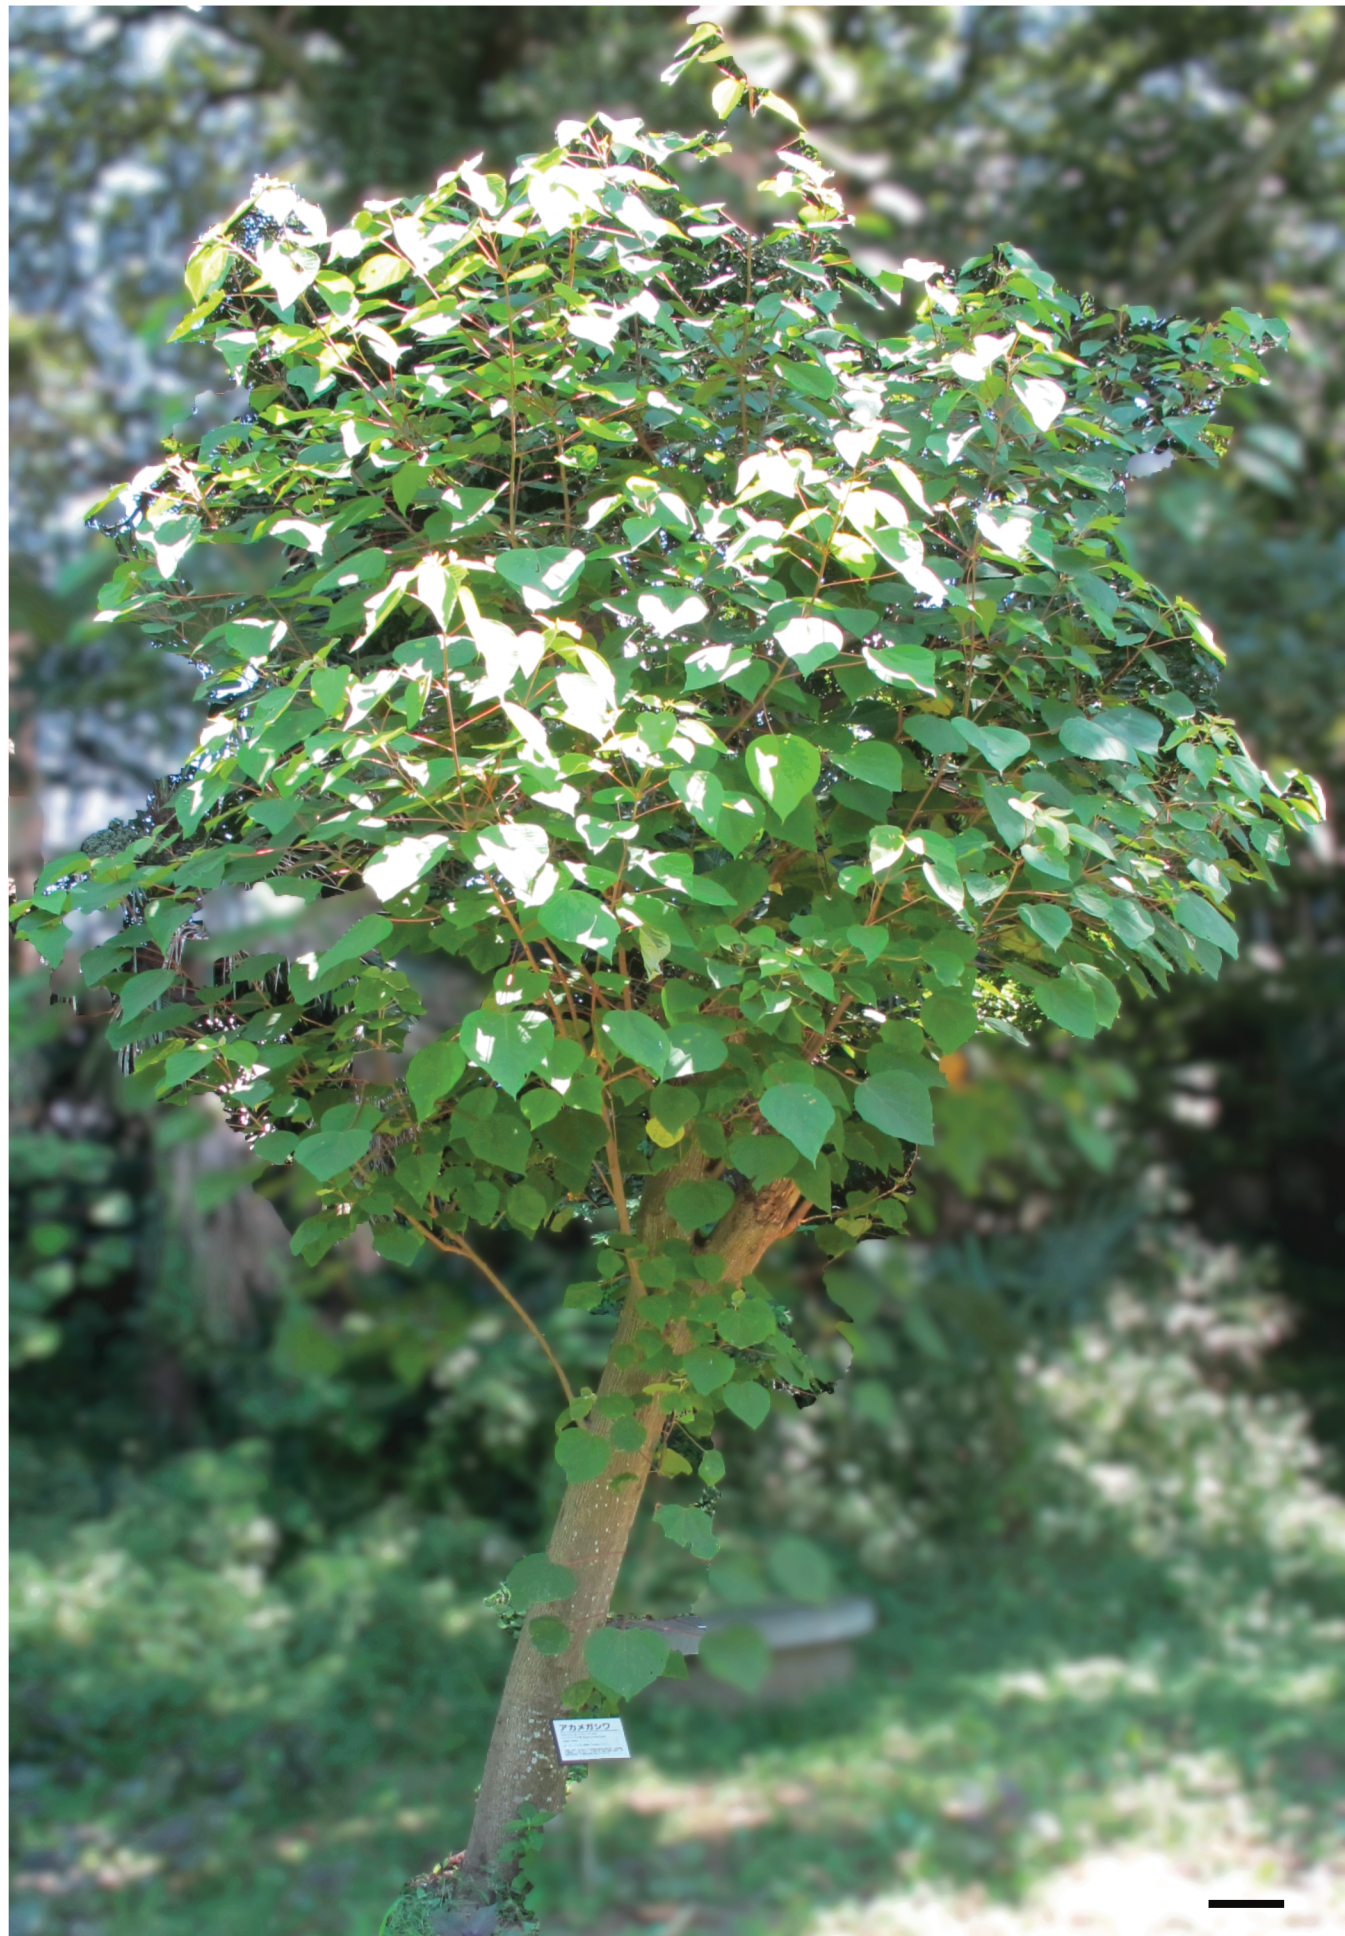

**Figure S9.** *Mallotus japonicus* plant used in this study growing in Chiba University Medicinal garden. The bar represents 15 cm.
