# Supplementary material for: Gene-Metabolite Network Analysis Revealed Tissue-Specific Accumulation of Therapeutic Metabolites in Mallotus japonicus
Source: MDPI journal article supplement (doi:10.3390/ijms22168835), 2021-08-17
Supplement: s1 [file s1]

**Table S6 Summary of Trimmomatic output for *Mallotus japonicus***

|                               | Young Leaf             | Mature Leaf            | Young Stem            | Mature Stem           | Bark                  | Central Cylinder       | Inflorescence          |
|-------------------------------|------------------------|------------------------|-----------------------|-----------------------|-----------------------|------------------------|------------------------|
| <b>Input Read Pairs</b>       | 12,621,042             | 13,177,546             | 10,823,838            | 8,183,699             | 8,821,033             | 11,416,398             | 12,910,459             |
| <b>Both Surviving</b>         | 11,502,563<br>(91.14%) | 12,022,817<br>(91.24%) | 9,849,490<br>(91.00%) | 7,429,176<br>(90.78%) | 8,047,221<br>(91.23%) | 10,491,432<br>(91.90%) | 11,795,640<br>(91.36%) |
| <b>Forward Only Surviving</b> | 758,700<br>(6.01%)     | 778,256<br>(5.91%)     | 655,663<br>(6.06%)    | 515,876<br>(6.30%)    | 515,753<br>(5.85%)    | 620,133<br>(5.43%)     | 739,085<br>(5.72%)     |
| <b>Reverse Only Surviving</b> | 235,010<br>(1.86%)     | 244,716<br>(1.86%)     | 207,332<br>(1.92%)    | 155,539<br>(1.90%)    | 169,433<br>(1.92%)    | 201,643<br>(1.77%)     | 248,933<br>(1.93%)     |
| <b>Dropped</b>                | 124,769<br>(0.99%)     | 131,757<br>(1.00%)     | 111,353<br>(1.03%)    | 83,108<br>(1.02%)     | 88,626<br>(1.00%)     | 103,190<br>(0.90%)     | 126,801<br>(0.98%)     |
