# Supplementary material for: Gene-Metabolite Network Analysis Revealed Tissue-Specific Accumulation of Therapeutic Metabolites in Mallotus japonicus
Source: MDPI journal article supplement (doi:10.3390/ijms22168835), 2021-08-17
Supplement: s1 [file s1]

**a**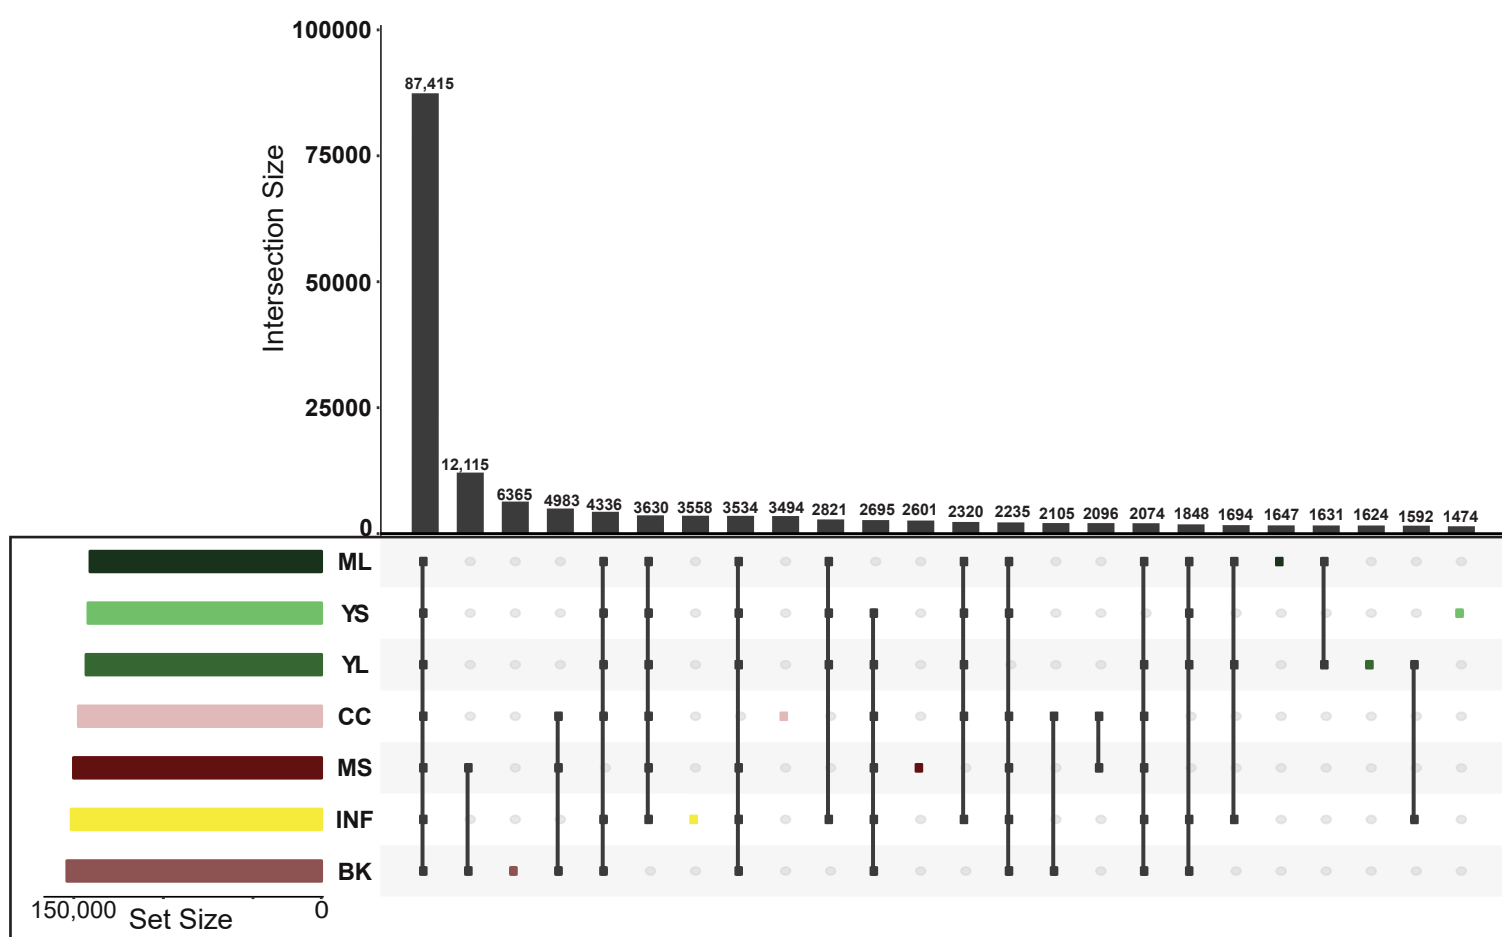**b**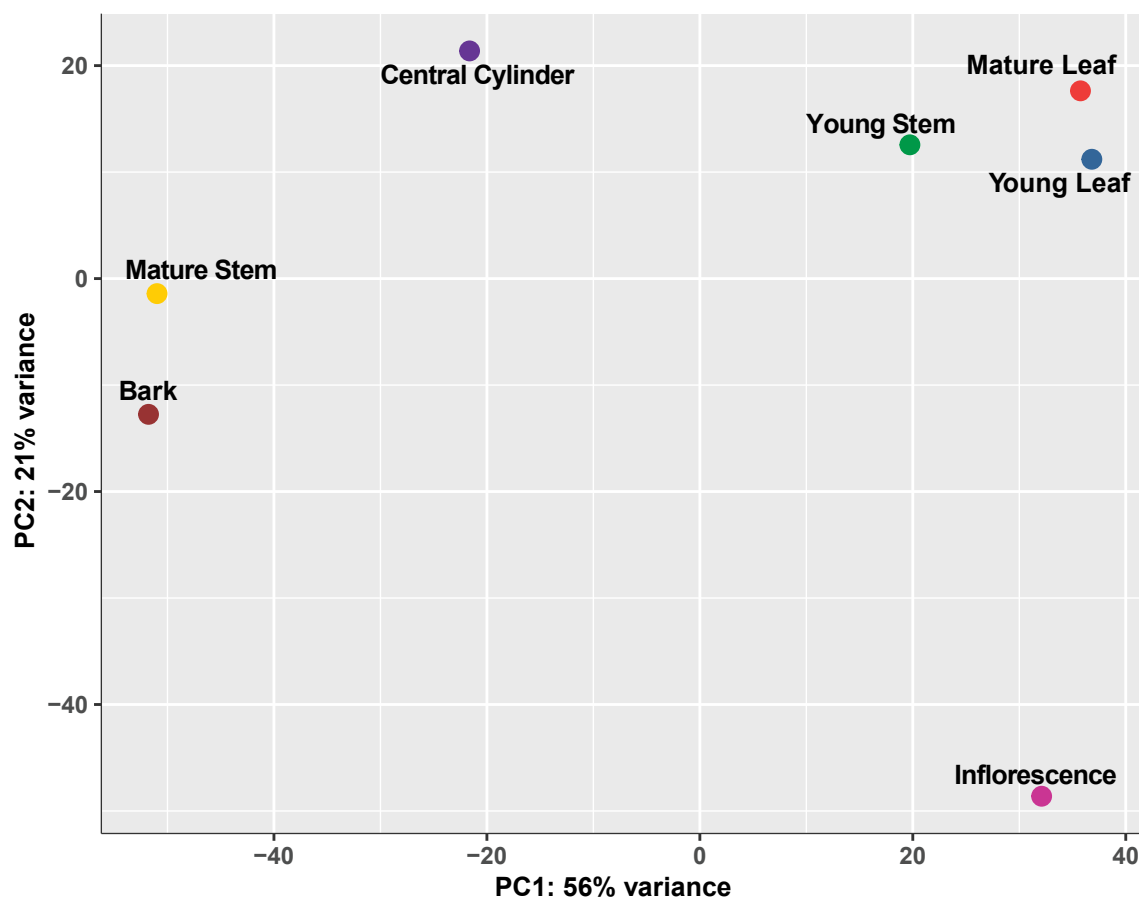

**Figure S3.** Transcriptome expression analysis across seven tissues of *Mallotus japonicus*. **(a)** Upset plot-based representation for the number of shared and unique active transcripts across each of the tissue of *M. japonicus*. The overlap of transcripts over 1,450 is being showed here. Abbreviations: ML: Mature leaf, YS: Young stem, YL: Young leaf, CC: Central cylinder, MS: Mature stem, INF: Inflorescence, and BK: Bark; **(b)** Unsupervised principal component analysis for transcripts expression across seven tissues of *M. japonicus*.
