# Supplementary material for: Gene-Metabolite Network Analysis Revealed Tissue-Specific Accumulation of Therapeutic Metabolites in Mallotus japonicus
Source: MDPI journal article supplement (doi:10.3390/ijms22168835), 2021-08-17
Supplement: s1 [file s1]

**a**

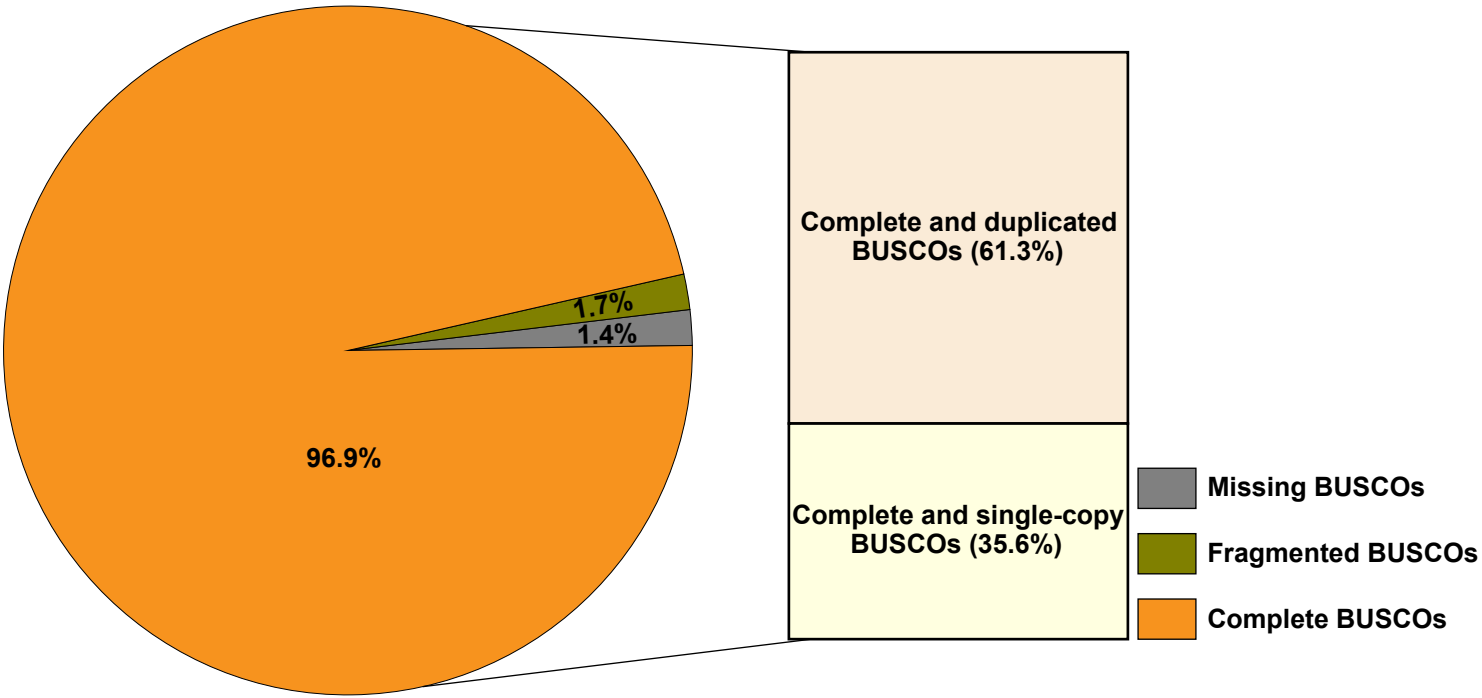

**b**

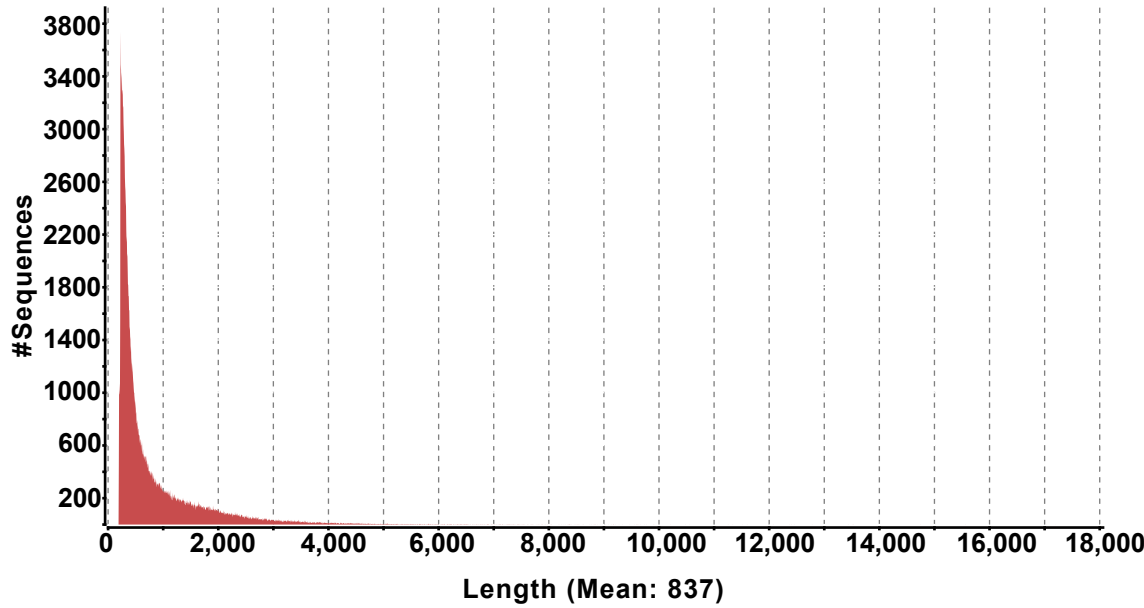

**Figure S1. Features of *de novo* transcriptome assembly of *Mallotus japonicus*.** (a) Evaluation of *M. japonicus* *de novo* transcriptome assembly using Benchmarking Universal Single-copy Orthologs (BUSCO) analysis; (b) Transcript length distribution plot for *de novo* transcriptome assembly of *M. japonicus*.
