# Supplementary material for: Gene-Metabolite Network Analysis Revealed Tissue-Specific Accumulation of Therapeutic Metabolites in Mallotus japonicus
Source: MDPI journal article supplement (doi:10.3390/ijms22168835), 2021-08-17
Supplement: s1 [file s1]

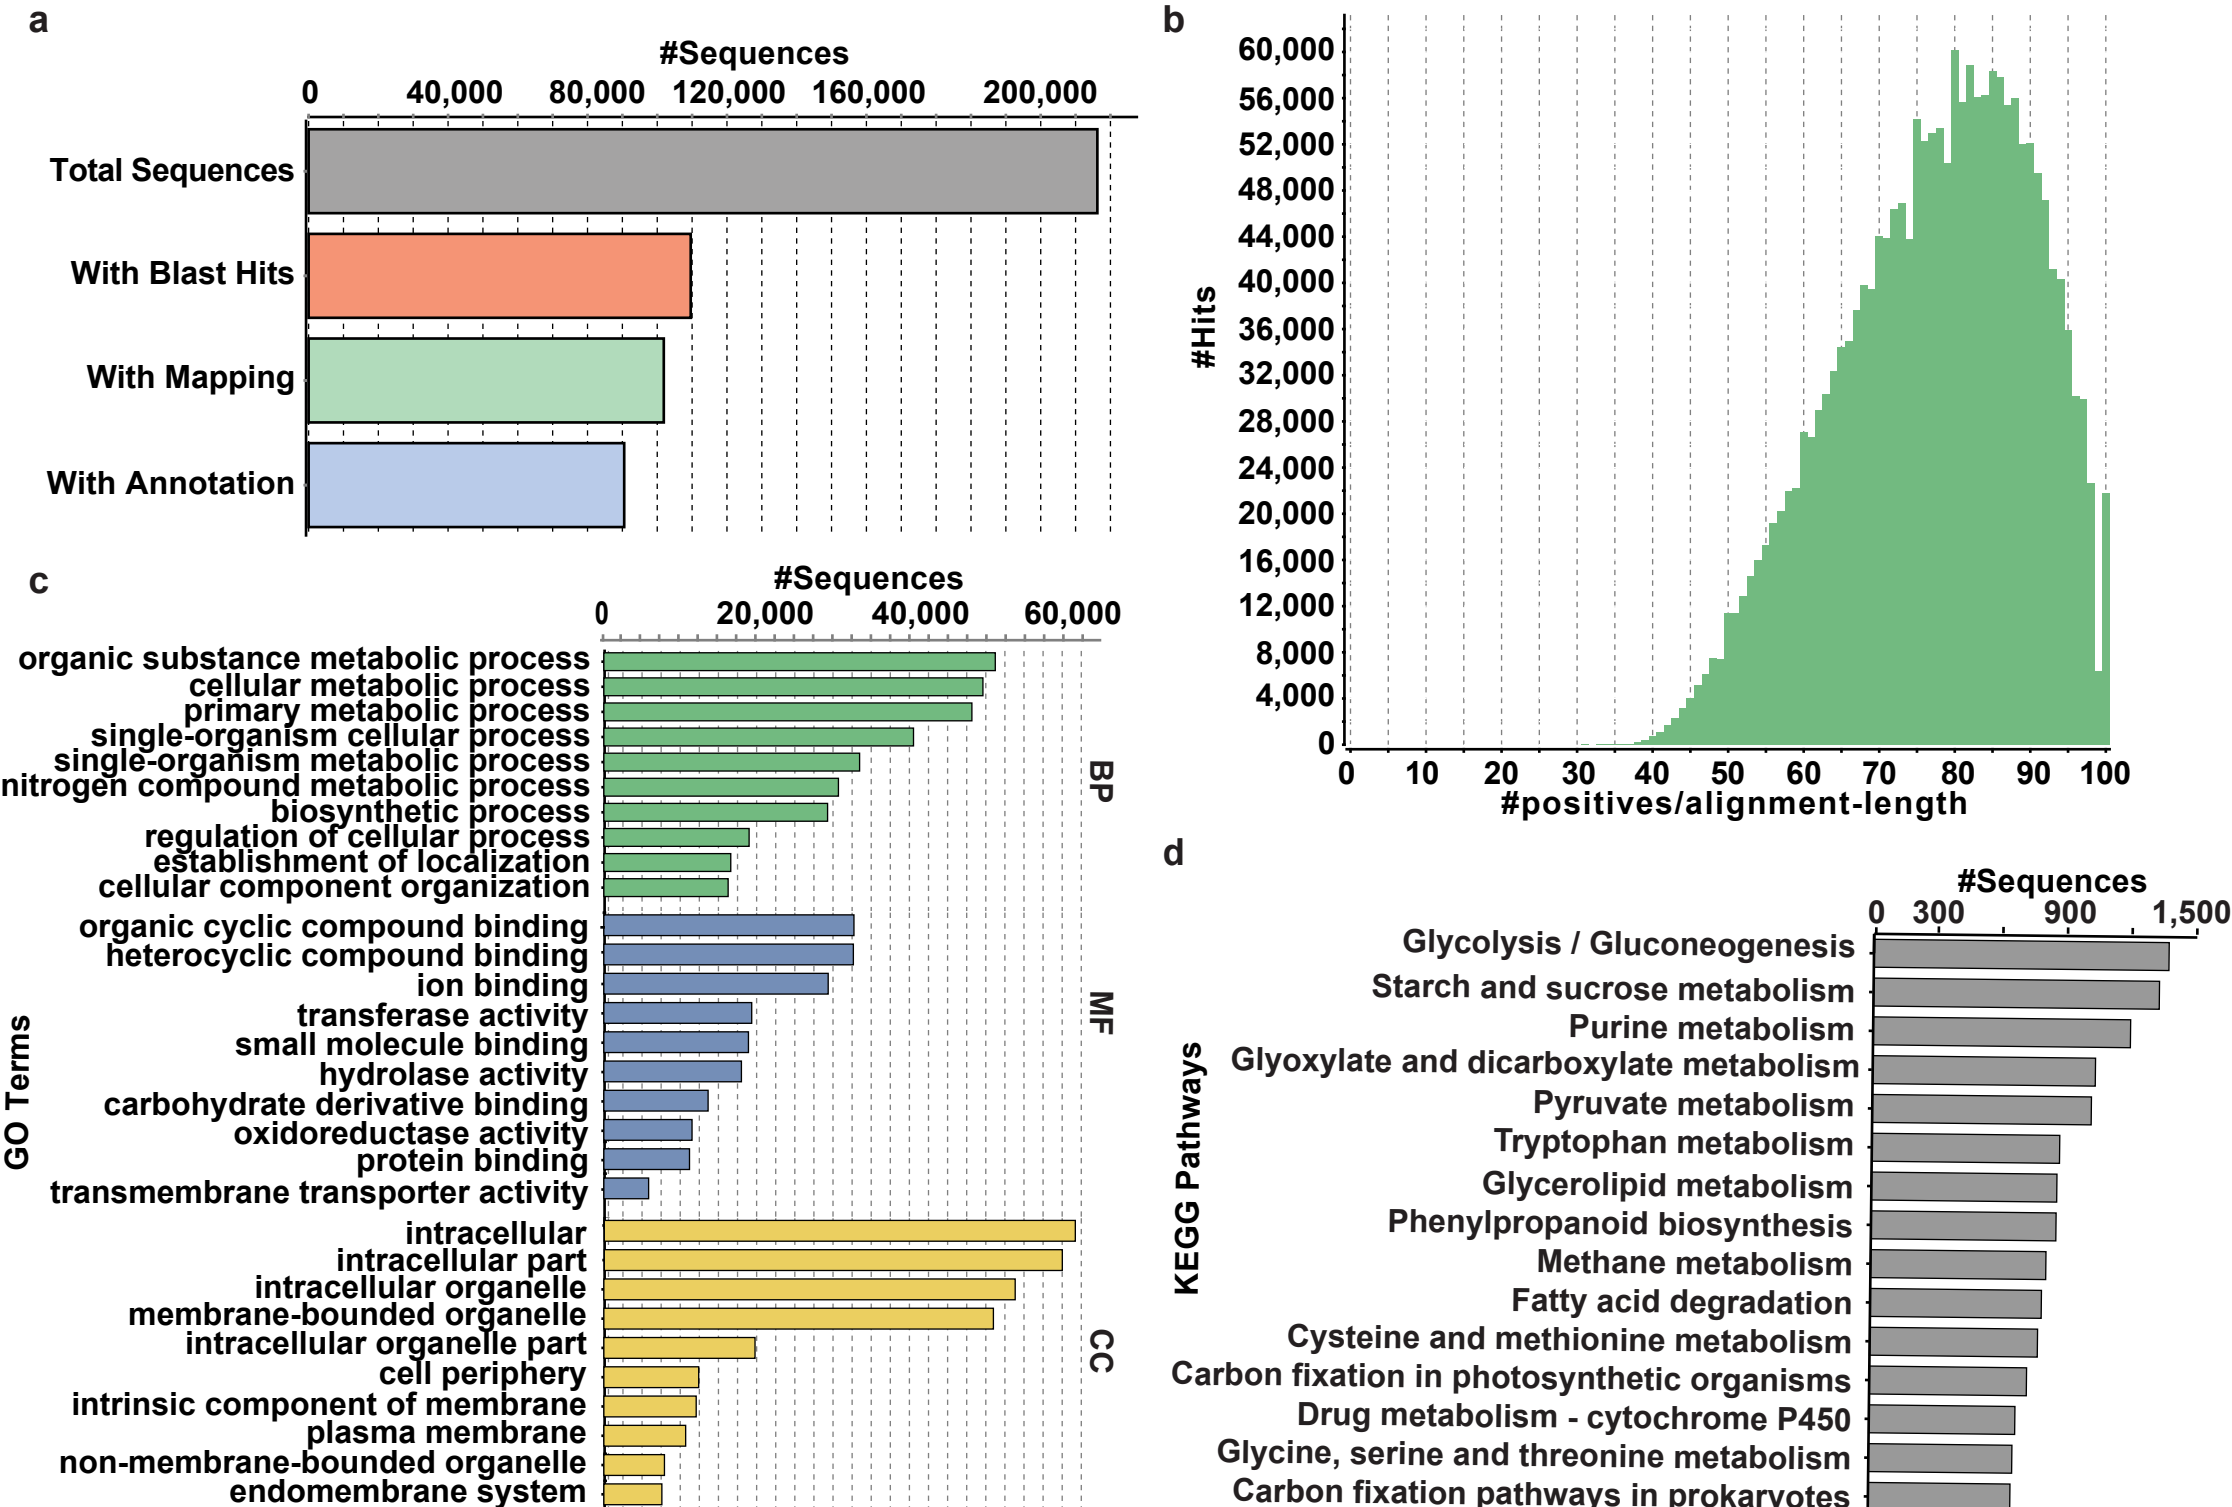

**Figure S2.** Functional classification of the *de novo* transcriptome assembly of *Mallotus japonicus*. (a) Homology based annotation summary for the assembled transcripts of *M. japonicus*; (b) Sequence-similarity distribution plot for the annotated transcripts using top blastx hits; (c) Gene ontology (GO) distribution plot for *M. japonicus* transcriptome assembly. GO terms for the annotated transcripts are summarized in three functional categories: biological processes (BP), molecular function (MF), and cellular component (CC); (d) Top 15 KEGG pathways represented by the assembled transcripts of *M. japonicus* based on the number of assigned transcripts.
