# Supplementary material for: Gene-Metabolite Network Analysis Revealed Tissue-Specific Accumulation of Therapeutic Metabolites in Mallotus japonicus
Source: Int J Mol Sci. 2021 Aug 17;22(16):8835. doi: 10.3390/ijms22168835 (PMC8396295; doi:10.3390/ijms22168835)
Supplement: Supplementary file 1 [file ijms-22-08835-s001.zip]

Archive with 27 entries (27 files):
- Figure S1 Features of de novo transcriptome assembly of Mallotus japonicus with legend.pdf
- Figure S2 Functional characterization of the assembled de novo transcriptome of Mallotus japonicus with legend.pdf
- Figure S3 Transcriptome expression analysis across seven tissues of Mallotus japonicus with legend.pdf
- Figure S4 Expression levels of transcripts included in each TransM module across seven tissues of Mallotus japonicus with legend_Megha.pdf
- Figure S5 Integrated network of correlated transcript and metabolite modules identified in Mallotus japonicus with legend.pdf
- Figure S6 Representation of phenylpropanoid biosynthesis pathway by TransM4 and TransM9 transcript modules with legend.pdf
- Figure S7 Representation of flavonoid biosynthesis pathway TransM4 and TransM9 transcript modules with legend.pdf
- Figure S8 Expression profile for GTs and OMTs involved in the biosynthesis of bergenin with legend.pdf
- Figure S9 Mallotus japonicus plant growing in natural conditions.pdf
- Supplementary Material Information-revised.pdf
- Supplementary_Table S10_Transcripts_used_for_WGCNA_analysis with legend_Megha.xlsx
- Supplementary_Table S11_WCNA_modules_identified_using_transcript_data with legend_Megha.xlsx
- Supplementary_Table S12_Correlation_calculation_between_transcript_and_metabolite_module with legend.xlsx
- Supplementary_Table S13_KEGG_pathway_mapping_for_highly_correlated_trans_modules_Megha.xlsx
- Supplementary_Table S14_GO_enrichment_analysis_for_highly_correlated_trans_modules_Megha.xlsx
- Supplementary_Table S15_KEGG_pathway_mapping_for_TransM4_TransM9_WCNA_cluster_Megha.xlsx
- Supplementary_Table S16_List_of_GTs_and_OMTs_used_for_phylogeny with legend_Megha.xlsx
- Supplementary_Table S17_Accession_number_of_functionally_characterized_GTs_and_OMTs with legend.xlsx
- Supplementary_Table S1_all_positively_aligned_features_with_legend_Megha.xlsx
- Supplementary_Table S2_Knapsack_and_KEGG_mapping_of_features with legend_Megha.xlsx
- Supplementary_Table S3_FBMN_for_positive_and_negative_ion_mode with legend.xlsx
- Supplementary_Table S4_MS2_validated_metabolites with legend_Megha.xlsx
- Supplementary_Table S5_WCNA_modules_identified_using_metabolome_data with legend_Megha.xlsx
- Supplementary_Table S6 Summary of Trimmomatic output for Mallotus japonicus with legend.pdf
- Supplementary_Table S7_BLAST_search_result with legend.xlsx
- Supplementary_Table S8_KEGG_pathway_mapping_of_transcriptome_dataset with legend_Megha.xlsx
- Supplementary_Table S9_FPKM_values_for_assembled_transcripts_of_Mallotus_japonicus_Megha.xlsx
