# Supplementary material for: Gene-Metabolite Network Analysis Revealed Tissue-Specific Accumulation of Therapeutic Metabolites in Mallotus japonicus
Source: Int J Mol Sci. 2021 Aug 17;22(16):8835. doi: 10.3390/ijms22168835 (PMC8396295; doi:10.3390/ijms22168835)
Supplement: Supplementary file 1 [file ijms-22-08835-s001.zip › Supplementary_Table S1_all_positively_aligned_features_with_legend_Megha.xlsx]

## Sheet: Sheet1
Table S1 Comprehensive list of total mass features being identified in this study and their intensity level across five biological replicates of seven tissues in Mallotus japonicus.
						Young Leaf (YL)					Mature Leaf (ML)					Young Stem (YS)					Mature Stem (MS)					Bark (BK)					Central Cylinder (CC)					Inflorescence (INF)
Alignment ID	Metabolite_ID	Average Rt(min)	Average Mz	MS/MS included	MS/MS spectrum	YL_Biological_replicate1	YL_Biological_replicate2	YL_Biological_replicate3	YL_Biological_replicate4	YL_Biological_replicate5	ML_Biological_replicate1	ML_Biological_replicate2	ML_Biological_replicate3	ML_Biological_replicate4	ML_Biological_replicate5	YS_Biological_replicate1	YS_Biological_replicate2	YS_Biological_replicate3	YS_Biological_replicate4	YS_Biological_replicate5	MS_Biological_replicate1	MS_Biological_replicate2	MS_Biological_replicate3	MS_Biological_replicate4	MS_Biological_replicate5	BK_Biological_replicate1	BK_Biological_replicate2	BK_Biological_replicate3	BK_Biological_replicate4	BK_Biological_replicate5	CC_Biological_replicate1	CC_Biological_replicate2	CC_Biological_replicate3	CC_Biological_replicate4	CC_Biological_replicate5	INF_Biological_replicate1	INF_Biological_replicate2	INF_Biological_replicate3	INF_Biological_replicate4	INF_Biological_replicate5
0	Metabolite_0	3.8	50.8346	FALSE		119	226	223	217	200	160	239	234	600	235	78	92	95	105	105	40	21	51	47	34	59	26	41	51	65	24	24	24	24	72	167	190	157	151	127
1	Metabolite_1	3.79	50.9138	FALSE		83	238	231	185	157	150	386	180	191	582	90	59	84	65	85	21	20	60	28	25	39	42	20	92	68	18	33	27	89	56	172	261	119	135	143
2	Metabolite_2	0.73	66.0188	FALSE		577	557	578	601	521	595	669	508	553	522	1097	991	1017	702	954	512	595	388	443	492	522	582	577	545	353	229	216	231	201	210	753	734	574	566	537
3	Metabolite_3	0.72	68.9823	FALSE		1177	1299	1232	1069	1144	1176	1132	1012	1102	1018	1897	2163	1669	2053	2093	773	686	914	800	846	787	820	507	795	726	427	463	413	564	342	1480	1386	1490	1332	1285
4	Metabolite_4	0.96	69.0341	FALSE		769	763	866	769	881	1387	1377	1253	1409	1353	920	974	960	1111	1006	1238	1221	1189	1104	1109	1218	1249	1290	1150	1135	735	816	651	735	798	1001	990	1131	888	1029
5	Metabolite_5	10.86	69.0695	FALSE		552	367	523	637	292	285	578	368	457	545	467	719	462	314	527	386	276	348	230	473	662	366	622	614	562	643	347	536	386	328	356	338	549	587	498
6	Metabolite_6	0.95	70.0655	FALSE		1300	1525	1270	1356	1216	771	840	850	830	1015	1725	1626	1770	1651	1721	849	898	854	897	823	1130	1038	1076	1185	1112	794	766	626	783	802	713	600	685	663	746
7	Metabolite_7	0.81	70.0661	FALSE		114	149	122	154	164	161	152	154	157	126	101	53	48	45	56	148	97	147	80	110	101	82	69	65	138	448	438	548	417	457	69	83	100	74	115
8	Metabolite_8	11.7	71.0858	FALSE		264	206	217	220	172	207	212	142	192	180	149	227	221	226	188	156	150	227	157	204	285	155	142	196	165	257	163	168	223	154	169	191	181	182	211
9	Metabolite_9	1	72.0813	FALSE		907	1043	916	983	905	1486	1442	1490	1516	1568	863	1054	887	969	743	1676	1771	1469	1483	1630	1680	1619	1489	1970	1408	2119	1921	1758	1856	2290	566	555	717	585	757
10	Metabolite_10	1.3	72.0817	FALSE		515	464	644	519	497	738	709	768	1006	684	696	866	593	630	631	725	703	843	793	781	755	689	782	884	604	692	752	605	652	680	459	438	422	345	449
11	Metabolite_11	0.72	73.5318	FALSE		578	547	671	662	582	606	518	550	552	696	661	1028	1032	1044	879	471	428	517	452	505	532	369	373	762	622	277	263	208	279	359	705	546	546	608	926
12	Metabolite_12	0.86	74.0238	FALSE		1122	1242	1067	1059	918	711	853	585	873	560	878	952	800	919	910	1419	1301	1394	1234	1340	732	1049	544	1001	670	1362	1278	1168	1175	995	1163	985	1024	1241	1133
13	Metabolite_13	0.88	74.0387	FALSE		895	1305	1204	1287	975	861	1219	1132	1008	1094	1050	1134	1091	1092	1095	1707	1658	1554	1350	1543	1051	1209	1013	1332	1059	1559	1574	1291	1416	1321	803	1234	1351	1419	1273
14	Metabolite_14	0.87	74.0603	FALSE		646	709	542	604	530	915	918	960	573	926	440	375	492	416	372	655	595	684	581	659	939	836	907	980	889	804	764	772	743	1187	437	348	407	469	514
15	Metabolite_15	0.91	81.0337	FALSE		671	837	812	961	762	827	817	573	886	962	838	805	882	889	812	653	739	698	817	627	664	734	723	667	846	401	568	507	405	399	1752	1137	1421	1853	1868
16	Metabolite_16	11.04	81.0702	FALSE		674	671	581	780	737	433	370	307	344	290	476	255	487	351	488	249	313	315	277	308	222	212	319	233	263	257	269	261	268	270	2631	2620	2314	2697	2609
17	Metabolite_17	11.19	81.07	FALSE		255	259	172	266	412	201	237	185	157	136	179	161	185	183	142	174	312	224	254	232	166	196	319	130	189	138	130	134	168	156	773	950	679	818	846
18	Metabolite_18	3.03	81.0732	FALSE		717	591	461	506	580	762	499	382	452	385	138	168	147	284	164	83	78	77	55	80	71	106	55	72	82	69	100	70	60	100	112	120	104	99	171
19	Metabolite_19	0.73	82.0134	FALSE		672	676	965	721	808	610	627	532	727	665	1406	1419	1256	977	1260	514	537	534	618	717	530	554	449	537	609	344	383	310	312	347	888	888	795	988	901
20	Metabolite_20	0.72	82.0141	FALSE		615	728	1285	605	1029	753	632	627	656	810	1450	1609	1400	1135	1200	514	537	534	618	717	667	554	449	541	609	344	383	310	312	347	1212	726	813	803	1131
21	Metabolite_21	0.72	82.5369	FALSE		560	573	662	574	523	558	591	633	589	690	1023	1157	888	797	802	418	527	528	548	721	570	380	552	645	493	272	394	206	297	315	711	641	502	631	774
22	Metabolite_22	0.73	83.0311	FALSE		360	315	447	429	343	408	407	414	421	281	591	513	507	550	582	248	284	354	306	272	257	372	346	340	306	232	156	139	191	185	410	431	347	436	387
23	Metabolite_23	0.97	83.0495	FALSE		415	467	366	462	475	481	476	549	569	457	808	901	1063	832	987	314	241	322	330	295	329	301	307	408	358	721	719	692	559	767	615	716	666	652	646
24	Metabolite_24	1.21	83.0502	FALSE		884	871	838	780	1109	1023	846	911	838	928	1417	1312	1474	1477	1403	280	331	292	218	268	235	263	326	232	230	435	304	378	259	315	937	1242	910	928	1176
25	Metabolite_25	0.87	84.0451	FALSE		7453	6906	6620	6975	6273	7506	7399	7079	7250	7150	4981	5038	4845	5855	4885	6798	7120	6533	6692	6610	3953	4053	4132	4605	4275	4220	3687	3858	3661	3832	4342	3708	4089	3952	4388
26	Metabolite_26	1.37	84.0804	FALSE		567	412	572	505	398	226	235	268	263	249	659	673	700	711	594	250	249	207	235	231	249	408	293	342	353	232	123	148	157	212	211	186	147	170	236
27	Metabolite_27	0.73	84.9598	FALSE		954	1038	962	989	1006	1163	1118	1098	1274	1293	977	1094	1057	687	1019	1793	1213	1628	1373	1431	2171	1649	1988	2173	1839	547	555	622	733	558	1533	990	2056	2201	2171
28	Metabolite_28	1.92	85.0273	FALSE		534	618	605	620	681	645	726	786	718	764	308	442	373	309	309	253	287	218	224	254	258	201	186	241	157	177	134	110	162	104	674	610	472	453	518
29	Metabolite_29	0.97	85.0292	FALSE		2697	2987	3012	2948	2951	4868	5364	5140	5518	5599	2071	1940	2210	1949	2156	4690	4259	4638	4801	4726	5250	5175	4756	5462	4997	2381	2532	2461	2505	2378	3559	3781	3931	3783	3545
30	Metabolite_30	1.09	85.0277	FALSE		1649	2399	2106	2029	2411	2894	661	2894	4030	3750	1137	1524	1507	1393	1625	2956	2757	2701	2906	2676	3156	2757	3075	3590	2722	1355	1442	1774	1359	1358	2550	2512	2376	2690	2712
31	Metabolite_31	4.64	85.029	FALSE		111	103	120	92	89	120	122	125	170	114	72	78	90	98	83	121	108	152	133	113	153	214	218	219	222	103	66	132	89	68	699	775	797	685	781
32	Metabolite_32	0.91	85.0285	FALSE		1197	1125	1088	3405	3237	2118	1946	1971	2071	2015	2634	2714	2707	2962	2721	1645	1596	1669	1560	5251	6167	5401	5107	5604	5347	875	2942	701	874	2513	1107	1102	1090	1255	1252
33	Metabolite_33	4.02	85.0308	FALSE		374	414	459	495	435	391	458	446	413	428	120	143	167	125	118	150	143	180	186	176	265	294	304	250	233	187	158	108	106	294	613	820	510	402	482
34	Metabolite_34	12.77	85.0765	FALSE		1828	1988	2002	2027	2103	1636	1891	1850	1920	1885	2076	2020	2060	1836	1881	1983	1577	1941	1939	1875	2107	1973	1573	2022	1869	1854	2056	1752	2102	1879	1999	2035	1879	2086	1878
35	Metabolite_35	11.11	85.0776	FALSE		1076	1014	1254	1127	1298	1150	948	1274	1272	1345	1342	1466	1518	1239	1548	1169	1232	1167	1150	1238	1538	1173	1255	1290	1270	1161	1300	1359	1137	1584	1285	1150	1279	1185	1376
36	Metabolite_36	11.61	85.0756	FALSE		1000	1244	1092	1234	1440	1228	1185	1000	1286	1274	805	992	933	826	770	1046	751	776	778	815	825	942	739	891	776	876	849	781	732	790	1282	1196	1522	1318	861
37	Metabolite_37	11.48	85.0764	FALSE		1114	1285	1304	1131	1259	1158	1290	1117	1370	1274	795	871	958	890	757	1003	999	807	807	808	994	832	1104	859	855	815	845	961	736	1066	1354	1072	1192	1307	1246
38	Metabolite_38	11	85.0768	FALSE		1555	958	1673	1741	1529	1531	1476	1730	1795	1490	1746	2108	1905	1757	1925	1753	1504	1648	1521	1584	2162	1469	1717	1126	1695	1483	1913	1658	1736	2204	1163	1045	1655	1051	1849
39	Metabolite_39	0.86	86.0599	FALSE		1091	1148	1190	1134	973	933	896	934	932	857	1443	1617	1432	1564	1484	586	598	537	625	584	472	542	487	515	528	335	265	338	369	222	713	562	679	676	871
40	Metabolite_40	1.95	86.0971	FALSE		4599	5008	4621	4440	4394	3516	3326	3817	4026	3614	5590	6221	5606	5845	5581	3817	3580	3943	3975	3720	3994	3766	3611	4625	3856	4085	4088	3409	3951	4768	4094	4021	3893	3748	5103
41	Metabolite_41	0.72	86.9935	FALSE		4857	5648	5097	4434	4386	4627	4277	4594	4860	4296	8138	9387	7382	8429	8281	4097	2900	3854	3345	3133	3414	3472	3169	3818	3090	1540	1210	1236	1334	1382	5643	5283	6999	5886	6973
42	Metabolite_42	0.86	87.0473	FALSE		4002	4118	3878	3723	3753	2355	2218	2346	2374	2273	5164	5698	4808	5135	4573	2251	2133	2240	2146	2247	1479	1406	1385	1574	1501	3046	2303	2607	2447	2809	2140	2141	2171	1993	2611
43	Metabolite_43	6.65	87.0439	FALSE		621	382	526	456	277	507	553	384	376	508	376	650	382	193	472	680	508	413	289	347	626	412	644	658	406	177	324	667	402	310	322	436	486	625	190
44	Metabolite_44	0.74	87.9986	FALSE		772	676	794	711	774	612	561	735	1008	670	1580	1852	1514	1687	1704	629	557	709	522	609	638	625	534	755	545	435	272	314	311	326	1092	788	1371	1138	1108
45	Metabolite_45	0.86	88.0394	FALSE		1445	1282	1095	1260	1098	955	835	902	912	850	866	973	886	924	909	1366	1120	1236	1296	1176	751	741	635	806	615	1030	950	1054	915	1005	1495	1249	1555	1485	1370
46	Metabolite_46	3.28	88.4094	FALSE		65	139	139	238	117	212	142	512	180	182	58	73	51	86	72	34	79	58	74	67	58	50	55	160	91	41	43	26	0	24	97	76	90	128	78
47	Metabolite_47	0.72	88.9905	FALSE		973	970	1058	796	764	762	849	771	932	782	1417	1725	1422	1590	1672	774	610	743	659	703	665	814	672	860	776	488	310	320	336	489	1058	1129	1438	1176	1358
48	Metabolite_48	12.8	89.0078	FALSE		744	755	818	717	745	705	764	776	733	780	847	832	919	717	863	842	678	1013	879	853	865	829	738	948	809	818	821	752	835	923	723	767	775	876	759
49	Metabolite_49	10.98	89.5085	FALSE		101	122	87	115	122	93	109	108	94	173	107	138	125	121	74	216	129	130	100	107	115	97	173	159	83	135	156	170	111	142	94	88	120	85	140
50	Metabolite_50	12.8	89.5066	FALSE		814	1017	859	967	881	3376	3359	3570	1112	936	991	5892	925	3519	3815	1145	769	1158	1039	3416	1472	3471	3658	1460	1009	866	3927	1098	1089	1058	977	934	5519	1337	1906
51	Metabolite_51	13	89.5071	TRUE	89.50554:50	4637	7172	6279	5139	5611	4009	6142	5083	6172	6000	5032	6403	5897	5066	5965	7403	4285	6398	5885	5068	6957	5820	5358	6736	6311	5237	6032	5812	5029	6009	4827	4458	7407	5959	5346
52	Metabolite_52	12.9	89.5063	FALSE		3152	3674	3229	3257	3260	2954	3030	3392	3692	3045	3360	5146	3168	3443	3143	4529	2125	3831	3436	3005	4817	3309	3495	5490	3635	2855	3233	3589	3630	3707	3730	3431	5822	5418	5120
53	Metabolite_53	12.93	90.0073	FALSE		772	1063	942	1044	691	657	837	826	833	786	969	1250	657	728	1318	567	748	954	1085	1036	952	1071	696	1195	1360	757	904	1022	724	962	883	680	934	901	928
54	Metabolite_54	0.86	90.0549	FALSE		614	822	716	850	566	666	832	904	1058	749	539	487	585	499	433	408	412	528	450	596	487	582	559	527	667	220	202	234	316	303	422	434	571	500	617
55	Metabolite_55	12.81	90.507	TRUE	61.5095:22	10413	12802	12708	12813	12224	10097	12654	12197	12418	11812	12758	13918	12786	11437	13171	13670	9906	13442	12938	13308	13395	12301	11495	13533	13030	11373	13099	12851	13108	13645	12723	12185	13672	13452	12376
56	Metabolite_56	12.81	91.0069	FALSE		1323	1551	1699	1799	1653	1332	1897	1795	1248	1565	1643	1778	1525	1234	1545	1390	1078	1946	1795	1468	1536	1593	1379	1627	1661	1300	1511	1442	1530	1830	1529	1474	973	1584	1260
57	Metabolite_57	4.14	91.0544	FALSE		131	167	133	154	126	118	183	103	109	133	49	66	94	102	84	105	184	155	141	157	116	167	147	196	178	123	105	108	86	106	724	751	646	668	664
58	Metabolite_58	12.81	91.5047	FALSE		4393	5264	5199	5413	4848	4442	5729	5067	5202	5095	5501	5739	5214	4979	5339	6037	4228	5684	5429	5585	5829	5481	4970	5569	5335	5015	5477	5287	5611	5390	5596	4962	5571	5612	4793
59	Metabolite_59	12.8	92.0042	FALSE		647	844	811	871	1016	815	881	751	822	920	841	842	1030	865	948	907	610	989	799	700	861	896	809	880	797	978	772	1122	815	1128	1084	755	836	789	776
60	Metabolite_60	12.8	92.5024	FALSE		967	826	892	934	882	746	803	801	797	804	1172	854	917	745	934	943	639	964	901	1294	857	817	866	995	879	1096	852	917	954	970	888	888	1041	943	742
61	Metabolite_61	1.2	93.0349	FALSE		509	558	503	472	516	541	712	543	701	825	912	850	994	1253	1152	199	188	183	212	170	123	139	127	123	125	113	91	80	123	88	589	720	882	587	637
62	Metabolite_62	0.96	93.0406	FALSE		549	615	568	540	645	556	480	502	502	577	610	641	859	565	655	188	206	245	223	178	151	165	139	170	169	138	129	220	163	157	490	461	445	516	424
63	Metabolite_63	11.05	93.0695	FALSE		621	230	461	425	778	396	235	167	291	268	175	183	202	237	160	162	196	156	157	170	147	155	163	202	167	206	138	178	130	161	1171	1115	1214	1305	1418
64	Metabolite_64	11.19	93.0693	FALSE		560	174	262	157	481	197	158	145	129	150	122	99	160	166	159	209	182	155	155	112	118	138	110	156	101	141	131	211	107	152	1008	1081	1110	981	1278
65	Metabolite_65	11.03	93.0701	FALSE		555	230	461	425	644	396	235	151	291	268	175	183	202	237	160	162	196	156	157	181	147	155	163	202	197	206	209	178	138	152	1382	1317	1382	1377	1790
66	Metabolite_66	0.76	94.0452	FALSE		591	418	631	536	470	467	362	611	432	594	612	710	557	529	574	230	514	315	351	347	354	303	437	444	310	319	220	295	288	231	528	436	358	572	675
67	Metabolite_67	11.04	95.085	FALSE		432	391	401	390	466	323	276	279	244	278	336	296	463	388	445	187	242	278	290	259	226	301	264	303	199	235	178	249	187	189	784	779	705	778	712
68	Metabolite_68	13.22	96.9615	FALSE		855	910	1144	1340	1001	1039	1063	1095	1099	1123	1400	1196	1152	1121	1104	1059	1116	1412	1080	1255	1105	963	939	1146	1271	925	1628	1235	1158	1196	994	939	977	1011	738
69	Metabolite_69	13.42	96.9637	TRUE	81.06557:18	1011	863	836	788	1014	758	1113	1071	931	1158	1079	1255	889	906	869	1018	1022	1074	1239	970	875	943	745	1224	1013	971	808	1158	1272	1008	894	834	891	877	635
70	Metabolite_70	13.3	96.9633	TRUE	69.4977:18	853	781	1014	958	882	916	985	1139	878	947	1070	1066	1060	1104	914	936	1152	1082	958	951	942	793	810	1090	1207	899	1202	1010	1006	757	843	803	857	781	629
71	Metabolite_71	0.96	97.0293	FALSE		1607	1689	1783	1655	1903	1517	1428	2704	2945	1645	1544	1554	1509	1536	1488	2567	2436	1168	2670	2655	2459	2392	2089	2649	2401	1414	1069	1500	1592	1362	2125	2139	903	836	1975
72	Metabolite_72	4.64	97.0288	FALSE		123	83	99	72	86	117	79	89	67	78	71	58	90	72	73	102	111	104	101	97	175	128	144	199	155	79	59	93	72	85	427	606	587	530	539
73	Metabolite_73	1.08	97.028	FALSE		1334	1601	1488	1704	1761	2259	2181	2046	1946	2245	1303	1004	1291	845	1237	2068	1675	1927	2104	1942	2090	1835	1634	1936	1908	960	1051	1195	1107	1023	1608	1797	1837	1769	1830
74	Metabolite_74	10.97	97.0652	FALSE		264	252	309	186	292	275	326	251	378	282	235	217	217	204	236	204	246	155	171	189	217	147	235	185	182	175	167	161	207	160	550	605	610	534	569
75	Metabolite_75	4.39	97.0655	FALSE		247	254	327	247	274	201	191	209	266	249	267	369	320	371	460	908	854	857	814	876	955	942	1090	1038	951	295	186	322	183	211	467	395	401	353	374
76	Metabolite_76	13.11	97.97	FALSE		954	828	720	1025	955	737	1279	811	870	1011	715	1058	872	787	863	872	824	1036	1040	845	861	791	1032	835	1014	1019	1311	894	975	894	873	900	1008	1065	830
77	Metabolite_77	13.01	97.9691	FALSE		1268	1598	1320	1418	1372	1165	1304	1333	1475	1385	1063	1442	1369	1191	1396	1348	892	1404	1293	1448	1363	1391	1081	1563	1063	1212	1404	1507	1400	1369	1341	1153	1300	1299	1079
78	Metabolite_78	12.88	97.9689	FALSE		824	1310	1245	1182	1075	1126	1075	1116	1404	1206	1238	1205	1060	1093	1242	1334	1153	1171	1105	1289	1270	1181	1114	766	1187	1133	1033	1431	1430	1172	1213	1141	1310	1104	1047
79	Metabolite_79	13.25	97.9729	TRUE	96.96398:37	855	948	891	880	933	795	1245	877	839	1106	803	1020	822	910	1103	1018	702	923	954	1008	850	875	1080	919	997	781	1072	937	1004	853	674	794	1008	795	997
80	Metabolite_80	13.36	97.9731	TRUE	96.96566:19	813	884	817	932	1029	708	1123	927	861	1106	943	1028	1165	1064	1183	1017	808	982	919	995	871	946	1024	871	998	801	1201	937	936	940	810	844	1094	894	971
81	Metabolite_81	13.01	98.5129	FALSE		2447	3108	2406	1625	2030	1172	2550	2201	1689	1512	2046	1835	1924	1787	1643	3049	1378	2709	2150	2536	2229	2851	1587	2540	2675	2579	2264	2574	2152	2295	2237	2456	1889	2111	1937
82	Metabolite_82	12.89	98.5115	FALSE		1692	1031	1007	1703	1725	832	732	831	1024	1615	1855	1245	870	1032	845	868	1633	1851	927	876	1299	948	1584	1357	1733	1846	1842	997	973	1097	1050	979	1357	1368	822
83	Metabolite_83	13.16	98.5139	FALSE		1038	1325	1518	1420	1571	1233	1560	1490	1395	1403	1304	1772	1241	1246	1309	1332	1127	1565	1400	1705	1707	1322	1391	1545	1958	1231	1470	1428	1713	1429	1425	1225	1257	1408	1066
84	Metabolite_84	12.8	98.9614	FALSE		1012	943	957	929	1043	1012	918	989	936	1128	1070	1003	1054	1018	1032	980	987	1062	1103	1068	958	1033	949	969	1079	1046	1018	1185	1016	1137	1054	1031	931	934	861
85	Metabolite_85	1.03	98.9853	FALSE		837	941	1026	997	977	1534	1856	1697	1890	1680	1125	1170	1399	1185	949	2711	2998	2226	2225	2329	563	773	690	752	728	806	954	867	723	911	1598	1741	3349	1549	1660
86	Metabolite_86	0.94	98.985	FALSE		1902	1878	1837	1753	1681	3087	3414	3084	3057	3226	2367	2487	2427	2374	2319	3762	3625	3707	3678	3442	784	1037	924	992	700	717	920	729	681	962	2880	2769	2385	2890	2136
87	Metabolite_87	1.01	99.0442	FALSE		943	749	848	859	880	1097	1309	1008	1368	1057	813	705	831	664	812	1224	1294	1200	1283	1327	1417	1392	1188	1637	1705	2281	2270	1895	2089	2634	1164	991	1265	1011	1263
88	Metabolite_88	0.97	99.0447	TRUE	80.97152:24 98.98422:20	784	754	710	774	756	1176	1268	696	1302	1169	856	880	936	948	924	1211	1318	1336	1245	1264	2050	2030	2013	2210	1545	2829	2864	2643	2571	2638	1019	1072	1169	1003	1031
89	Metabolite_89	12.82	99.5129	FALSE		1845	2165	2117	2029	2294	1873	2064	1977	2056	2237	2237	2241	2145	2122	2187	2142	1331	2227	2199	2192	1319	2042	2021	2303	2175	2105	2218	2413	1640	2331	2142	1997	2130	1947	1833
90	Metabolite_90	12.81	99.9698	TRUE	90.51205:29	2569	2585	2925	2879	2593	2702	2803	2566	2733	2913	2207	2888	3011	3111	2990	2140	3051	3056	2859	2894	2825	2869	2888	2835	2553	3000	2858	2971	2975	3263	2780	2656	2563	2835	2654
91	Metabolite_91	0.76	100.025	FALSE		316	528	333	396	278	386	287	391	342	291	570	547	497	532	510	220	218	257	357	267	260	252	234	281	207	149	147	146	275	144	353	355	495	557	389
92	Metabolite_92	1.94	100.111	FALSE		316	422	458	402	454	304	308	341	328	323	850	902	847	881	818	483	462	515	421	530	353	515	338	428	424	372	335	347	290	415	326	330	308	341	258
93	Metabolite_93	11.75	100.115	FALSE		947	938	820	894	889	1021	1017	1278	932	914	1038	967	966	989	945	1278	980	948	1003	973	967	1047	905	1047	995	1012	991	1053	973	1163	1246	953	1105	1499	910
94	Metabolite_94	11.51	100.112	FALSE		1140	1280	1191	1262	1400	1079	1415	1316	1422	1202	947	1257	976	813	994	1080	924	956	935	1060	1281	1157	1050	1095	933	1353	977	1165	1500	1237	1204	1128	1587	1306	1195
95	Metabolite_95	12.77	100.113	TRUE	83.08884:36 100.11707:31	6257	6193	6463	6421	6871	5917	6196	5990	6151	7051	7038	6444	6998	6534	7286	6706	5945	6512	6783	6474	6857	6960	6760	6408	6270	6370	6889	7071	7119	7142	6439	6628	6298	6783	6308
96	Metabolite_96	11.61	100.113	FALSE		1185	1319	1163	1399	1553	1124	1515	2042	1377	1597	934	1136	1116	1185	1022	1089	889	1180	995	1105	1135	1029	1130	1003	793	1274	1053	921	1119	975	1246	1198	1587	1003	1135
97	Metabolite_97	11.99	100.116	FALSE		1117	1194	833	1121	790	1127	883	1254	1066	876	1033	942	997	977	1038	951	871	951	842	1130	935	946	826	1339	877	1094	810	1100	958	1183	856	1105	1147	1068	1081
98	Metabolite_98	3.49	100.337	FALSE		131	135	128	116	95	126	116	164	189	154	48	65	20	34	51	29	41	23	34	35	55	33	53	37	22	42	18	16	18	17	148	564	59	70	58
99	Metabolite_99	12.8	100.51	FALSE		828	789	846	856	926	797	1108	939	937	943	934	898	914	770	974	1028	891	957	934	940	915	830	781	890	852	797	824	874	919	908	989	957	902	896	751
100	Metabolite_100	12.8	100.957	FALSE		508	486	597	491	695	498	517	558	586	633	615	561	656	683	671	541	612	606	584	534	622	557	550	545	627	509	616	655	691	637	619	674	502	608	562
101	Metabolite_101	0.73	101.008	FALSE		696	412	529	447	195	278	570	240	524	340	821	776	439	830	870	695	281	559	578	397	457	663	513	291	549	224	233	224	260	204	284	414	966	761	351
102	Metabolite_102	1.87	101.024	TRUE	73.02546:22 101.01967:17 101.02433:28	2354	2021	1959	1917	2208	1884	1636	1673	1815	1834	2150	1987	2301	2151	2081	369	444	397	397	462	414	354	569	391	377	223	162	237	190	144	1415	1412	925	1076	1666
103	Metabolite_103	2.44	101.061	FALSE		321	250	257	330	253	225	298	315	279	285	141	169	106	154	132	196	132	197	176	174	152	114	186	146	144	119	117	115	138	132	1560	1442	1476	1413	1785
104	Metabolite_104	10.97	101.071	FALSE		3941	1870	3859	4048	3834	3401	1880	3517	3880	3910	4008	4629	4177	4082	3749	4203	2164	4005	4138	3877	4361	3900	4082	1453	4053	3695	3991	2213	3653	3799	1851	1121	4458	4757	4351
105	Metabolite_105	11.97	101.07	TRUE	100.11223:45	1777	1925	1191	1426	1353	1137	1505	1334	1710	1540	1293	1588	1418	1564	1762	1326	1760	1847	1538	1340	1508	1269	1371	2476	1148	1664	1753	1608	1784	1298	1548	1219	1595	1372	1261
106	Metabolite_106	11.51	101.071	FALSE		3561	3178	3123	3073	3273	3288	3045	2928	3646	3440	1744	2126	1904	1887	3566	1838	1974	1845	1849	1717	2062	1745	1276	2378	1760	1927	1703	1651	1582	1470	3334	3138	4104	3431	3484
107	Metabolite_107	12.75	101.071	TRUE	59.06353:52	2395	2277	2254	2252	2402	2425	2216	2305	2068	2256	2305	2718	2276	2642	2480	2735	2098	2459	2442	2086	2811	2162	2213	2748	2145	2391	2367	2224	2603	2362	2355	2125	2700	2768	2952
108	Metabolite_108	11.27	101.072	TRUE	83.0875:16 101.07474:63	4015	3531	4590	2933	4024	2440	2573	3860	4231	2382	2319	2563	2570	2237	2498	2052	1856	2240	2175	2559	2400	2315	2219	2687	2419	2141	2568	2060	2303	2471	2341	2324	2399	2497	2845
109	Metabolite_109	11.16	101.072	TRUE	100.07375:21 101.07:42	2007	2233	2160	2507	4620	1950	2317	4690	5051	2478	1741	2396	2292	1974	2325	1877	1810	4304	2129	1737	1869	1707	2178	2234	2035	2339	2047	1670	2105	2169	1945	1931	2170	4747	1982
110	Metabolite_110	11.04	101.071	FALSE		3800	3660	4322	2859	3707	2280	3693	4302	3605	3311	3797	4576	3614	3704	3396	4519	3417	3013	3544	3773	3656	3039	3127	4694	2723	3681	3345	4062	3335	3441	3831	4114	4071	2996	3544
111	Metabolite_111	11.61	101.071	FALSE		2464	2859	2456	2550	2194	2382	2317	2329	2639	2537	1810	1684	1687	1887	2100	1693	1219	1570	1363	1683	1493	1575	1622	1593	1643	1388	1838	1651	1395	1581	2754	2565	3252	3348	2777
112	Metabolite_112	0.86	101.071	FALSE		1276	1127	1145	1070	925	1121	947	1273	1094	1043	1063	1094	1048	1237	1122	1202	1241	1186	1209	1259	689	758	684	647	665	824	743	782	706	738	434	464	601	484	602
113	Metabolite_113	12.66	101.073	TRUE	100.11469:21 101.07338:42	1234	1447	1165	1207	1065	1088	1437	1115	1304	1341	1360	1422	1336	1482	1415	1374	1316	1348	1628	1198	1514	1351	1384	1599	1368	1216	1321	1560	1111	1388	1106	1366	1125	1204	1701
114	Metabolite_114	12.52	101.073	FALSE		1669	1399	1092	1451	1460	1518	1265	1564	1374	1614	1249	1511	1474	1124	1165	1552	1267	1201	1248	1390	1235	1273	1388	1145	1464	1080	1476	1208	1568	1089	1516	1301	1404	1323	1636
115	Metabolite_115	11.77	101.076	TRUE	60.04575:36	1549	1932	1216	1119	1137	1358	1429	1420	1367	1350	1336	1616	1232	1373	1229	1600	1063	1648	1294	1413	1650	1635	1435	1356	1394	1320	1490	1276	1361	1458	1359	1490	1694	1589	1751
116	Metabolite_116	12.8	101.965	FALSE		1218	761	768	867	791	1286	787	731	807	819	854	851	816	1325	850	756	1167	796	948	560	659	795	772	696	717	1458	935	898	829	977	749	1335	789	748	1270
117	Metabolite_117	12.8	102.033	FALSE		568	1273	636	838	772	764	705	664	598	665	679	781	686	649	734	673	564	795	721	754	739	703	1280	729	756	739	650	730	891	775	638	931	836	778	864
118	Metabolite_118	0.88	102.056	TRUE	84.0406:46 84.0507:23 87.04296:32 88.04449:22 102.05384:17 102.05841:18	5989	6181	5869	6078	5832	6814	6970	6824	6893	7100	3009	2879	2891	3214	3049	5872	5599	5686	5824	5608	5085	4882	4726	5040	4673	4515	4168	3970	4180	4714	4808	4286	4844	4891	5141
119	Metabolite_119	12.65	102.129	FALSE		1304	1214	1365	1645	1788	1324	1498	1463	1304	1569	1893	1256	1546	1463	1720	1483	1256	1378	1350	1554	1566	1611	1461	1241	1333	1113	1563	1722	1847	1869	1700	1861	1418	1509	1109
120	Metabolite_120	12.75	102.128	FALSE		1310	1230	1706	1278	1643	1415	1456	1336	916	1513	1804	1459	1699	1501	1684	1366	1168	1479	1236	1609	1432	1367	620	1467	1385	1364	1434	1628	1811	1531	1805	810	1415	1408	1505
121	Metabolite_121	4.29	103.038	FALSE		256	283	263	234	324	232	156	204	211	157	146	141	109	95	105	89	150	93	92	117	133	172	182	236	129	80	74	100	70	69	542	732	619	616	608
122	Metabolite_122	2.6	103.039	FALSE		168	116	103	164	136	251	125	243	178	267	132	82	66	124	83	64	83	82	114	95	62	81	72	103	101	52	84	61	69	83	796	959	801	587	997
123	Metabolite_123	2.35	103.054	FALSE		816	884	717	748	696	858	772	776	839	892	824	902	902	926	859	599	564	642	506	467	578	632	673	802	592	706	624	648	598	536	926	1022	778	716	1053
124	Metabolite_124	12.74	103.956	FALSE		1726	783	1519	2427	1626	1805	991	1893	1618	1897	982	1474	976	968	952	1532	1857	965	1734	888	1573	1480	1532	870	1385	1863	1513	1613	1720	1703	902	1694	1597	1453	1392
125	Metabolite_125	12.76	103.956	FALSE		1726	1571	842	1539	2190	1873	1604	1341	1500	1715	1437	1382	1484	1765	1431	1461	1493	1715	1841	1481	1266	1727	1610	1377	1545	1692	1668	1706	956	1575	1249	877	1273	820	1331
126	Metabolite_126	12.62	103.956	TRUE	102.13031:49	1318	1387	1651	1850	1861	1551	1455	1604	1772	1505	1903	1688	1596	1509	1662	1611	1619	1794	1629	1676	1455	1681	1712	1455	1748	1699	1593	1677	1456	1592	1476	1415	1405	1392	1500
127	Metabolite_127	11.41	103.957	FALSE		567	517	623	636	631	571	549	671	543	557	610	483	530	557	619	523	602	609	497	594	604	623	508	485	561	618	572	560	452	727	673	678	540	786	636
128	Metabolite_128	11.27	103.958	FALSE		531	695	710	662	588	677	896	712	472	558	604	543	548	508	548	551	758	612	535	607	604	529	592	599	667	623	522	522	691	700	665	573	595	660	529
129	Metabolite_129	11.2	103.958	FALSE		609	653	710	783	531	677	903	712	649	663	646	672	598	508	613	659	671	690	636	739	598	620	639	606	741	673	685	664	691	801	776	699	595	669	689
130	Metabolite_130	11.16	104.104	FALSE		418	600	516	655	465	424	600	416	486	530	600	410	570	543	709	356	431	428	401	486	308	333	349	187	458	324	471	435	382	309	440	488	305	265	294
131	Metabolite_131	12.73	104.108	TRUE	104.1053:119 104.11179:36	1176	2553	1927	1281	1223	1078	912	876	1144	1303	1195	856	1340	1131	2186	768	1222	822	1073	1021	749	1012	807	701	678	827	1043	919	779	700	1230	1391	633	560	660
132	Metabolite_132	0.84	104.108	TRUE	60.04652:16 60.08143:17 61.04327:17 88.03946:16 104.06999:19 104.1063:4242 104.14709:43	85329	88851	85769	82876	80394	60536	57777	60707	61449	58048	60932	66706	62264	64894	61407	35523	36863	35237	34747	34964	16423	15865	16221	18598	16323	13646	13518	12640	12509	12570	53760	46594	47452	48287	60577
133	Metabolite_133	11.63	104.108	FALSE		713	604	843	816	707	811	684	747	604	669	624	434	697	692	659	464	669	558	574	595	483	556	464	438	575	474	492	629	493	430	717	681	454	459	477
134	Metabolite_134	1.01	104.107	FALSE		6103	6587	6512	6257	6051	5357	4883	4574	5828	1941	7198	6156	6005	5977	5757	4132	4370	3852	3868	3915	2079	1674	1832	1827	1646	1187	1808	1497	1359	1281	4857	5071	3922	4153	5756
135	Metabolite_135	11.45	104.108	FALSE		1445	619	1203	1254	801	798	1224	701	747	613	749	488	877	647	568	512	653	571	466	586	404	548	527	380	616	445	648	575	588	555	569	753	556	508	457
136	Metabolite_136	11.3	104.109	FALSE		573	623	646	734	786	626	548	672	451	661	737	518	617	702	631	432	527	478	477	578	437	491	453	362	579	533	400	443	490	455	484	562	410	392	288
137	Metabolite_137	4.39	105.001	FALSE		535	580	610	510	448	400	302	273	386	377	525	630	601	606	661	1537	1612	1379	1547	1548	2015	2305	1980	2252	2073	487	444	586	496	476	692	576	661	597	538
138	Metabolite_138	0.72	105.004	FALSE		2445	2306	2178	1997	1686	2031	1834	1858	2034	1726	3139	3828	2800	3653	3412	1913	1298	1702	1542	1431	1564	1620	1548	1711	1536	926	583	609	679	585	2354	2211	3025	2607	3501
139	Metabolite_139	3.36	105.001	FALSE		476	525	547	513	556	397	284	285	314	320	658	790	647	662	670	1059	1130	934	976	1099	1297	1265	1472	1502	1473	438	291	410	393	377	375	313	323	307	309
140	Metabolite_140	4.64	105.018	FALSE		136	129	82	79	66	79	97	76	72	67	87	118	122	123	74	171	188	163	158	139	260	134	131	189	184	69	61	82	62	61	956	1313	1215	1062	1224
141	Metabolite_141	3.79	105.032	FALSE		334	542	350	482	432	204	278	318	270	207	649	596	574	647	629	620	699	692	632	627	508	638	676	600	681	277	301	303	307	294	306	366	197	166	293
142	Metabolite_142	3.62	105.033	FALSE		420	458	405	507	438	198	247	272	322	257	464	573	556	470	504	1271	1219	1122	1140	1108	1033	1279	1176	1488	1296	560	637	702	720	601	311	225	197	169	285
143	Metabolite_143	3.62	105.035	TRUE	105.00302:28 105.03761:31	420	458	405	507	438	198	247	272	322	257	441	573	540	470	504	1213	1257	1114	1402	1143	1212	1138	1217	1373	1172	624	678	858	711	662	311	225	197	169	285
144	Metabolite_144	3.02	105.045	TRUE	105.04215:50 105.04794:22	643	538	634	549	597	208	251	124	196	184	1157	1137	1267	1292	1343	90	95	125	99	63	160	118	129	97	127	58	105	91	47	105	430	318	237	285	254
145	Metabolite_145	2.65	105.071	TRUE	103.05416:27 105.06654:74	92	56	78	77	94	84	71	80	99	99	73	86	102	113	83	67	94	75	107	81	92	114	103	108	62	76	101	52	73	112	3008	4849	3551	2656	3086
146	Metabolite_146	4.02	105.069	FALSE		69	67	89	90	85	105	73	73	88	70	114	63	81	53	61	91	171	92	85	96	105	96	153	121	103	69	128	50	77	67	608	721	679	660	737
147	Metabolite_147	4.03	105.069	FALSE		69	67	89	90	85	105	73	73	88	70	114	63	81	61	61	91	171	92	67	96	91	96	153	121	103	69	128	50	77	67	608	839	679	660	870
148	Metabolite_148	0.83	105.11	FALSE		5482	5880	5860	5872	5131	4262	4325	4308	3958	3976	4002	4469	4070	4531	3874	2553	2691	2586	2657	2230	1040	1111	907	1337	1181	880	956	919	781	873	3336	3532	3207	3406	4052
149	Metabolite_149	12.76	105.953	FALSE		730	746	793	717	804	905	690	844	828	740	808	778	780	519	706	801	526	759	798	853	829	713	684	745	856	834	676	539	752	871	710	755	695	820	668
150	Metabolite_150	12.61	105.954	FALSE		821	967	799	974	654	876	792	785	810	653	825	655	769	952	811	918	751	730	957	877	785	739	771	677	779	981	845	878	997	825	788	706	769	824	684
151	Metabolite_151	0.74	106.005	FALSE		603	503	481	447	457	396	385	465	605	366	660	773	567	549	781	491	300	547	383	336	392	384	394	341	478	294	247	211	165	159	552	460	726	674	614
152	Metabolite_152	0.95	106.035	FALSE		2357	2657	2754	2551	2794	2837	3181	3423	3570	1762	797	984	926	818	680	1691	1301	1570	1373	1517	1507	2052	1562	1607	1571	1693	1674	1288	1712	1991	1054	2229	2102	2155	2030
153	Metabolite_153	0.85	106.051	FALSE		3776	3509	3700	3901	3405	4651	4465	4887	4339	4116	913	1086	889	1047	986	2431	2157	2260	2152	2191	2464	2097	2288	2526	2189	2580	2355	1980	2203	2626	2778	2407	2918	2963	2986
154	Metabolite_154	12.78	106.086	TRUE	88.07439:16	2183	2151	2014	1978	2068	1966	2007	1843	1681	1850	2126	1991	2035	2338	3443	2138	1953	2031	2148	1792	2148	1916	2041	2011	1786	2149	2167	2086	2191	3048	2659	2040	2059	1923	2088
155	Metabolite_155	0.73	107.001	FALSE		578	614	607	548	505	565	564	611	560	501	613	754	671	597	602	547	495	529	419	445	414	480	597	548	407	269	269	229	266	279	521	597	558	525	696
156	Metabolite_156	3.15	107.048	FALSE		188	141	189	119	189	185	162	198	156	131	823	797	910	814	769	304	375	253	246	360	214	219	265	314	225	90	77	113	104	72	306	322	259	299	261
157	Metabolite_157	2.21	107.049	FALSE		521	610	667	650	556	598	568	547	614	543	262	249	260	239	270	137	148	189	202	172	217	186	173	173	144	93	91	91	94	66	882	836	766	652	1034
158	Metabolite_158	2.43	107.049	FALSE		928	742	778	1042	890	509	681	575	546	468	493	537	546	564	491	298	226	211	292	200	303	374	337	373	485	359	301	289	315	425	718	790	642	580	629
159	Metabolite_159	2.53	107.049	FALSE		715	693	783	825	830	350	398	387	359	411	299	247	300	292	204	99	137	166	70	124	122	129	199	121	137	167	113	110	115	83	286	328	375	236	300
160	Metabolite_160	4.58	107.05	FALSE		337	352	340	295	202	324	321	338	317	231	1099	1225	1082	1237	930	1112	1186	1191	1082	974	1300	1316	1386	1595	1417	245	227	288	258	204	291	409	381	286	507
161	Metabolite_161	10.26	107.084	FALSE		226	283	213	345	233	235	175	208	206	210	145	141	145	126	193	142	165	176	187	338	88	118	93	105	125	87	83	92	79	48	529	597	557	529	602
162	Metabolite_162	13.6	107.949	FALSE		787	406	526	563	693	527	514	667	553	452	627	629	562	700	529	611	546	714	710	682	554	581	769	660	543	576	588	469	638	663	449	510	539	546	618
163	Metabolite_163	12.97	108.962	FALSE		664	755	642	643	978	675	618	793	763	1390	714	579	709	874	588	836	720	759	702	602	700	864	584	810	714	821	1431	686	616	590	793	762	821	671	650
164	Metabolite_164	12.97	109.024	FALSE		1253	888	1030	834	769	721	955	918	1120	902	797	1071	743	734	672	919	621	736	744	790	1196	797	778	1686	1124	702	837	939	874	1034	623	618	1322	1242	912
165	Metabolite_165	0.98	109.028	FALSE		1492	1476	1418	1366	1422	1719	1810	1798	1621	1630	1622	2041	1799	1874	1507	1793	1469	1323	1799	1574	1571	1683	1443	1948	1463	785	851	1061	1021	894	1901	2460	516	2175	1693
166	Metabolite_166	5.67	109.027	FALSE		157	186	172	200	211	154	182	207	205	175	230	220	154	133	193	507	459	514	611	489	538	605	578	616	704	269	253	196	238	212	232	310	189	259	243
167	Metabolite_167	4.14	109.028	FALSE		316	208	237	222	204	212	194	248	213	191	189	235	253	194	185	311	202	227	242	207	196	222	194	195	249	222	299	197	218	226	910	1066	829	624	1005
168	Metabolite_168	4.64	109.029	FALSE		244	221	221	203	221	201	213	222	232	194	199	239	198	213	162	161	165	192	195	265	314	222	256	257	233	166	203	193	202	179	1310	1603	1461	1204	1576
169	Metabolite_169	2.06	109.029	FALSE		465	501	558	399	415	489	294	355	434	365	693	615	737	790	745	269	282	176	267	293	200	171	187	278	180	265	164	292	195	216	285	278	281	215	373
170	Metabolite_170	0.93	109.029	TRUE	81.03532:16	1577	1464	1550	1341	1420	2037	2014	1994	1920	2070	1700	1859	1645	1859	1624	1717	1727	1545	1586	1592	1110	1192	1179	1640	1227	762	672	1075	903	931	2161	2503	2370	3243	3208
171	Metabolite_171	2.05	109.028	FALSE		465	501	558	383	415	489	294	337	434	437	693	859	737	596	583	189	282	176	205	232	166	153	157	278	180	178	164	142	154	168	285	278	253	215	373
172	Metabolite_172	1.93	109.031	FALSE		686	649	455	795	579	759	657	651	850	681	286	355	345	564	310	270	210	211	215	218	169	193	166	155	180	128	118	152	130	161	317	326	285	467	395
173	Metabolite_173	11.09	109.063	FALSE		219	181	253	209	277	322	319	236	290	333	172	154	169	162	180	177	156	189	187	112	157	117	153	171	162	156	157	179	170	160	778	786	361	390	349
174	Metabolite_174	10.68	109.1	FALSE		319	294	208	303	281	251	302	217	288	276	195	144	220	209	170	156	293	153	173	214	114	142	122	113	237	125	116	100	103	123	637	919	589	633	674
175	Metabolite_175	11.09	109.101	FALSE		533	360	413	427	513	452	393	301	405	420	564	329	643	592	661	352	379	289	378	322	392	347	337	360	391	361	375	302	313	371	684	556	466	523	641
176	Metabolite_176	10.26	109.102	FALSE		325	321	227	379	274	305	190	245	292	367	177	224	161	268	156	198	239	193	263	229	113	147	168	135	130	147	127	118	96	136	670	683	534	763	689
177	Metabolite_177	4.3	109.102	FALSE		515	606	509	660	550	235	169	195	261	251	95	124	92	117	104	138	156	165	129	118	193	143	169	161	167	134	199	123	102	109	118	167	120	130	122
178	Metabolite_178	12.8	109.521	FALSE		1169	1279	1369	1374	1047	1007	1212	1138	1271	1149	1239	1329	1166	1161	1155	1327	976	1420	1257	1278	1396	1283	1166	1344	1303	1245	1350	1345	1267	1262	1424	1221	1306	1256	1472
179	Metabolite_179	0.72	110.01	TRUE	66.01873:39 68.98091:71 74.03263:20 82.53703:16 109.99721:16 110.00903:41	42559	47543	47725	44264	43609	39553	39121	41805	43076	41950	77453	78824	73681	71038	73484	28660	30928	28348	31039	30538	26908	29289	25592	30844	28619	12673	11979	11384	12362	11831	54788	53128	47881	47530	51650
180	Metabolite_180	2.83	110.021	FALSE		721	733	828	947	787	717	765	820	704	652	768	740	597	649	623	1042	771	1085	1022	1013	834	935	1171	1430	1019	823	860	932	878	811	520	600	797	760	769
181	Metabolite_181	12.8	110.02	FALSE		2052	2403	2514	2380	2202	8497	2321	2324	2682	2279	2390	2771	2260	2248	2488	2947	7121	2696	2499	2581	2797	2269	2355	3162	2532	2126	2480	2565	2486	2598	2477	2239	16073	12599	4733
182	Metabolite_182	12.97	110.021	TRUE	68.99645:75	1049	9421	9799	12259	11491	10785	11935	11631	12832	11777	8804	13718	11714	11061	12497	11382	10131	12962	8896	11495	14211	8857	11910	13469	12675	11558	9025	9249	8970	9150	11780	11176	15062	13560	14296
183	Metabolite_183	13.1	110.02	FALSE		5612	11999	10893	12352	11459	9908	11259	11407	12864	11494	11462	14082	11514	5548	4848	13409	9053	7049	12116	12989	15172	11597	8330	13817	10770	612	5630	8573	7701	11269	3676	10180	12455	7602	12186
184	Metabolite_184	2.99	110.02	FALSE		838	759	873	843	834	892	925	804	949	726	812	959	828	715	845	1017	1033	1117	1071	1109	1297	753	1191	779	1198	800	964	987	812	920	820	868	820	809	923
185	Metabolite_185	10.99	110.022	FALSE		303	204	291	358	306	270	324	237	271	323	347	434	285	269	282	463	249	267	272	383	408	258	361	463	270	219	283	337	349	351	273	254	326	248	390
186	Metabolite_186	13.29	110.02	FALSE		2477	2795	2651	3056	2510	2390	2739	2787	2995	2499	2579	1235	2566	2602	2567	3164	2067	2902	2896	2899	3535	2655	1751	3470	2962	2572	2363	2999	2557	3119	2434	2499	2955	2937	2857
187	Metabolite_187	0.81	110.072	TRUE	70.05832:25 110.06241:16 110.07114:38	784	750	889	777	758	403	591	571	451	369	301	295	271	318	335	576	577	608	577	517	222	268	264	179	290	1619	1799	1980	1975	1880	155	133	142	142	157
188	Metabolite_188	12.78	110.522	FALSE		1162	1158	901	878	1155	1033	992	1197	1116	923	1019	1447	902	973	1017	1544	872	1042	1253	1021	1678	993	1366	1734	1063	1147	923	1032	1044	1074	1099	960	1776	1476	554
189	Metabolite_189	12.89	110.521	FALSE		1206	1872	1095	1917	1716	1510	1853	1343	1974	1602	860	2051	1800	1174	1176	2241	1578	1145	1034	1096	1852	1746	964	2107	2021	968	1177	1873	1913	1022	1856	1223	2004	2204	2263
190	Metabolite_190	12.97	110.522	FALSE		1190	1701	1631	1875	1344	1431	1464	1418	1498	1194	1679	1430	1477	1291	1363	1829	1258	1572	1363	1134	1291	1601	1340	1386	1664	1130	1494	1680	1675	1505	1313	1063	1714	1947	1700
191	Metabolite_191	1.28	111.023	FALSE		2423	2581	2413	2263	1713	3108	2895	2475	3076	2702	4075	4099	3141	1326	1658	592	693	609	531	543	430	384	462	397	474	178	154	258	175	146	2403	2622	2967	2615	3483
192	Metabolite_192	2.58	111.007	FALSE		761	667	611	648	790	562	716	600	627	595	763	795	735	812	684	738	640	661	657	593	721	557	720	636	764	620	569	610	646	658	576	569	634	606	630
193	Metabolite_193	1.66	111.009	TRUE	68.99077:17	2617	2707	3314	2974	2317	797	863	921	1124	876	5224	5188	5267	5031	5122	674	938	793	833	752	562	752	593	611	592	282	251	218	255	242	3091	3855	2906	2531	3278
194	Metabolite_194	1.44	111.008	FALSE		1316	1263	1787	1303	1159	566	504	536	541	643	2732	2795	2737	3698	2618	356	448	495	352	320	324	267	291	295	294	229	122	89	218	148	1917	1706	1764	1210	1943
195	Metabolite_195	0.72	111.01	FALSE		7580	9151	8252	8119	7416	7444	7253	7841	8345	6937	13938	13861	13409	11174	13339	5522	5852	4893	5612	6127	4802	5374	4803	5480	4880	2362	2178	2126	2141	2623	9959	10104	8549	8750	9195
196	Metabolite_196	10.73	111.02	TRUE	54.62022:26 89.86829:65	3763	4262	3890	3431	3712	3337	4023	3998	4668	3882	4516	4338	3837	3911	4804	5478	3441	4150	4612	3852	5303	5015	4171	4765	4570	3735	4190	4604	5164	5154	3654	3906	3479	3492	3692
197	Metabolite_197	10.85	111.02	TRUE	69.06981:17 69.07399:24 69.09389:31 89.06223:20 111.12202:40 111.13004:27	2915	3479	3021	2870	3145	2998	3259	2721	3470	3009	2993	3737	3709	3183	3453	3694	2171	2875	3491	3042	4137	3019	3000	4032	3071	3414	2930	3235	3533	3250	2004	2759	3708	3513	2928
198	Metabolite_198	10.93	111.02	FALSE		1377	1853	1774	1991	1812	1820	1783	2009	2111	1879	2199	2398	2041	1770	2215	2182	1222	2077	2580	1790	2461	2149	2015	2285	1783	1812	1945	2061	2597	2221	1662	1487	1931	1846	1418
199	Metabolite_199	12.81	111.021	TRUE	90.50774:38 98.96363:17 99.96363:23 110.01614:18 111.02005:282	26429	73539	72805	72771	71106	61842	33421	32825	32476	32142	36806	79021	71501	66941	37769	40900	23403	37654	38039	74631	78826	72497	28475	39895	74929	29802	37899	38267	73658	74922	72145	67406	41156	76821	71059
200	Metabolite_200	6.26	111.02	FALSE		1150	1390	1522	2177	1904	1304	1459	1773	2125	1315	1741	2079	2217	1439	2209	2096	1604	1760	1786	1615	2593	2207	2314	2319	1960	1866	1597	2178	2156	1701	1315	1344	1685	1720	1404
201	Metabolite_201	13.03	111.02	FALSE		6956	7710	7843	4879	2789	6166	8010	8201	8134	7610	7133	8364	7626	6223	7740	7396	6380	7999	7997	4383	8521	7503	6056	7971	8379	6214	6999	7306	4568	7535	7476	7908	9067	8830	7755
202	Metabolite_202	12.95	111.02	FALSE		28019	9226	8078	8422	30037	27309	8463	31956	31782	30869	8204	9569	31470	7182	30459	30399	7214	8997	8515	31178	31309	29314	27138	30649	9096	26558	30050	7884	29743	8249	8733	8779	9898	33706	8683
203	Metabolite_203	2.75	111.02	FALSE		730	643	693	829	666	527	622	590	703	629	912	921	765	659	717	667	758	667	630	652	622	574	543	604	656	736	668	823	684	684	734	570	712	610	692
204	Metabolite_204	13.27	111.019	FALSE		1380	1188	1522	1293	1342	1182	1309	1502	1331	1370	1250	1308	1335	870	1486	1346	1148	1290	1412	1186	1419	1598	1728	1522	1380	1219	1321	626	1135	1234	1307	1318	1559	1203	1286
205	Metabolite_205	7.39	111.023	FALSE		1783	2506	2031	2069	1919	1696	1955	1707	2226	1817	2436	2056	2473	2264	2095	2250	2502	2434	2429	2269	1797	1916	1726	2429	3121	643	1672	3175	1893	2494	2462	1540	2030	1818	2353
206	Metabolite_206	6.84	111.023	FALSE		1558	2202	2207	1979	1916	1419	2270	2259	1603	2650	2349	2674	2187	1584	1842	2465	1808	1622	1727	2410	1897	2066	611	2847	1686	1771	2369	2253	1860	1614	1916	1665	1785	2162	1588
207	Metabolite_207	6.78	111.023	FALSE		1617	2231	2207	2082	1916	1610	2270	2487	1709	2894	2349	2674	2312	1770	2037	2431	1959	1583	1727	2410	2396	2406	1843	2991	1591	1943	2425	2194	1648	2143	1916	1665	1785	2162	1588
208	Metabolite_208	9.79	111.023	FALSE		3423	2867	3606	2807	2488	3167	3036	3409	3617	3282	4503	4309	3526	2439	4324	3932	2957	3139	3962	3293	2800	3356	2275	3368	3445	2907	2445	2269	3647	3399	3282	2264	3599	3635	3009
209	Metabolite_209	8.92	111.024	FALSE		2236	2975	3659	3721	3571	3395	2749	3177	2948	2583	3307	4894	2813	3264	3463	4157	2981	2917	3640	3314	3620	2449	2438	3199	2430	2133	2671	2783	3497	3607	5439	5053	5954	5387	4563
210	Metabolite_210	9.52	111.023	FALSE		984	2571	2400	2617	3207	2446	2362	3126	3065	2468	2413	2201	2638	2436	2230	2717	2060	2075	1689	2087	2784	2353	2267	2059	2500	2155	2370	2513	1958	2672	3505	3057	4110	3557	3000
211	Metabolite_211	5.91	111.023	FALSE		1343	1403	1438	1618	1319	1237	1107	1399	1487	1439	1483	1761	1172	1414	1457	1644	1159	1351	1758	1183	1357	1500	1402	1775	1603	1311	1617	1592	1632	1690	1373	1495	1292	1065	1103
212	Metabolite_212	6.42	111.023	TRUE	110.02248:69 111.02852:31	1252	1570	1704	1488	1425	1637	1260	1481	1398	1598	2187	1672	1652	1898	1486	2268	1947	2006	1924	1673	2223	2378	2115	2446	1965	1825	1681	1614	1418	1652	1369	1451	1886	1561	1820
213	Metabolite_213	9.41	111.022	FALSE		3696	3240	3198	3966	3638	2932	2520	3482	2996	3553	2573	3313	3847	3221	2972	3883	1801	2286	2582	3355	4183	3563	2768	3096	2729	2569	3165	3830	3093	2687	3168	5871	4208	4259	3445
214	Metabolite_214	8.24	111.023	FALSE		2066	3681	2859	3192	2336	2397	3050	2864	3400	2049	2955	3233	2847	2133	3703	2602	2184	2539	3468	2241	2450	2218	2154	3219	2973	2526	3340	3306	2717	2572	3573	2537	2772	3092	759
215	Metabolite_215	7.75	111.023	FALSE		563	2920	3413	3032	2153	2354	3538	2585	2875	2425	2673	3127	2998	616	2570	3223	1920	2577	2494	2283	2228	2894	1798	4102	2335	2627	2851	2784	3084	2546	2541	3118	3319	2573	2293
216	Metabolite_216	9.08	111.021	TRUE	58.52029:26	2582	3038	2509	2523	3230	2387	2454	2630	1809	2558	2703	2082	2063	2418	2257	2673	2016	1955	1785	1898	2497	1894	1910	2359	2496	2657	2154	2260	2527	2271	5627	5257	6577	5532	5830
217	Metabolite_217	10.38	111.025	FALSE		696	2301	3239	2820	3224	2696	2913	2553	3739	2308	3089	4525	2864	2690	2479	3725	2101	2598	3268	3310	2973	2477	2211	2801	2719	2710	2852	3137	4305	3243	2001	2630	3191	2700	3194
218	Metabolite_218	7.2	111.023	FALSE		1383	2595	2313	2173	2112	1768	2279	1916	1956	2176	2539	1802	2800	2445	2355	2073	2479	2698	2906	2406	2032	1936	1986	2534	3258	1956	1576	3035	2153	2643	1332	1922	2198	1983	2275
219	Metabolite_219	8.73	111.022	TRUE	84.48438:37	2035	1964	1686	1972	1706	1753	2118	1837	2296	2012	2071	2435	1789	2294	2428	2717	2441	2669	2142	1963	2640	1803	2073	1790	1882	1730	2233	1801	2348	2281	2268	2240	2532	2317	1894
220	Metabolite_220	10.17	111.024	FALSE		1735	2821	2423	1776	1911	2392	2040	2109	2503	2260	2736	2833	2147	2422	2541	1957	2064	2629	2877	2712	2616	2098	2704	2827	2210	652	2234	2371	3109	2306	2063	2974	2345	3037	2741
221	Metabolite_221	10.04	111.023	FALSE		1881	2616	2609	2464	2524	2290	2337	2377	2617	2487	2221	2639	2703	2144	2475	2674	2005	2335	2321	2398	2441	2319	2669	2802	2491	780	2594	2369	2549	2388	2406	2340	2160	2809	2899
222	Metabolite_222	9.23	111.023	TRUE	90.50695:18	1810	2491	2204	2096	2386	1661	2543	2441	2476	2365	2834	3000	2347	825	2029	2655	2494	2136	2165	2029	2551	2471	1764	2131	2478	1890	1906	2907	2585	2700	2274	1671	2325	2392	1737
223	Metabolite_223	3.73	111.024	FALSE		448	570	560	521	435	353	411	404	488	388	681	802	591	549	625	768	611	670	702	536	716	631	611	557	734	740	777	1133	819	1011	409	517	437	440	430
224	Metabolite_224	7.85	111.024	FALSE		2111	2435	2974	2783	2153	2058	3155	2223	2766	2349	2138	2752	2998	1622	2493	3206	1920	2293	2375	2090	2226	2762	1798	3479	2038	2520	2598	2330	2843	2569	2541	2831	2967	2650	2373
225	Metabolite_225	4.26	111.024	FALSE		565	603	694	735	586	599	592	574	705	734	778	823	810	597	799	859	804	838	857	977	798	645	875	754	870	979	1140	1089	1192	913	561	563	655	660	682
226	Metabolite_226	5	111.024	FALSE		994	1036	978	882	988	805	951	1309	1155	1305	1209	1161	1126	1196	1136	1350	1148	1146	1002	1031	1037	1100	1007	924	967	1189	1587	1218	1026	1240	1103	904	1098	844	1381
227	Metabolite_227	10.56	111.022	FALSE		2720	2961	2999	2800	2814	2944	2704	2621	2979	3038	2462	2785	2807	2216	3276	2526	3343	2707	2436	2026	2662	3243	3035	2995	2570	2479	2369	2852	2812	2849	4233	4757	5929	4351	3205
228	Metabolite_228	7.98	111.024	FALSE		1978	2036	2050	1872	1760	1839	1769	1749	1617	1736	2098	1998	2239	2092	2043	2202	1693	1781	2160	1679	2511	2008	1691	1850	2122	2190	2556	2284	2023	1879	2290	1853	1879	2054	2256
229	Metabolite_229	3.59	111.025	FALSE		465	503	464	531	423	453	453	408	439	379	723	538	636	513	499	833	596	685	606	631	586	621	567	631	840	808	772	859	820	1029	416	591	472	555	427
230	Metabolite_230	5.42	111.025	TRUE	90.39491:22	1237	1008	1265	1391	1281	1283	1385	1026	1560	1074	1482	1332	1571	1201	1298	1582	1228	1163	1221	1139	1286	1479	1208	1556	1342	1328	1470	1504	1610	1401	1276	1113	1373	1180	907
231	Metabolite_231	6.6	111.025	TRUE	97.06642:62	1306	1567	1795	1525	1529	1360	1398	1475	1530	1621	1641	1796	1938	1713	1618	1763	1452	1577	2137	1979	1853	1430	1293	2302	1462	1482	1347	1341	1462	1595	1577	1875	1357	1747	1690
232	Metabolite_232	9.68	111.025	FALSE		2394	2378	2375	2171	2639	1747	2260	2494	1875	2363	2173	2205	2371	2079	2380	2318	1838	1629	2413	2244	2545	2163	2216	2750	2472	652	2276	2715	2157	2346	2342	2204	2405	1847	1794
233	Metabolite_233	4.7	111.025	TRUE	85.99256:16	895	968	1079	1159	727	773	939	890	1174	904	926	1447	1020	992	1129	1420	871	943	916	1151	829	903	904	862	1027	863	1396	1074	1202	1588	1140	1333	928	809	917
234	Metabolite_234	8.63	111.026	FALSE		1914	2573	1909	2161	2076	2085	2241	2451	2613	2175	2345	2350	2218	2309	2100	2631	2068	2453	2515	2309	2431	1900	1984	1971	1827	1996	2082	1911	2450	2259	2593	2692	2010	3020	2225
235	Metabolite_235	8.35	111.026	FALSE		1755	3197	2833	2981	2184	1913	2726	2665	3400	2029	2764	2837	2847	1998	3879	2500	2488	2645	3130	2241	2159	2144	2208	3233	3229	2227	3143	3240	2997	2188	3575	2644	2806	3112	2664
236	Metabolite_236	1.21	111.045	TRUE	111.05558:42	2391	2635	2390	2474	1913	2616	2572	2749	2836	2706	4051	4321	3988	4692	4328	535	674	566	508	506	405	334	397	372	456	192	178	242	127	168	2322	2785	2866	2472	3308
237	Metabolite_237	0.97	111.044	FALSE		1103	1219	1091	1043	1010	1508	1448	1365	1520	1362	2861	2779	2908	2809	2881	403	584	394	453	392	335	322	336	386	409	358	277	392	282	234	1216	1562	1428	1542	1516
238	Metabolite_238	11.02	111.087	FALSE		607	330	305	389	477	306	230	293	331	326	337	450	338	298	358	328	333	285	308	246	376	343	238	332	266	291	281	282	207	294	777	856	816	760	960
239	Metabolite_239	11.18	111.08	FALSE		374	304	302	246	420	286	239	267	346	265	268	567	274	282	306	358	287	355	287	280	431	320	277	449	357	315	315	281	219	272	665	669	795	781	997
240	Metabolite_240	8.91	111.083	FALSE		144	98	119	136	113	123	151	163	134	118	134	135	142	129	117	159	131	136	169	124	155	123	148	137	139	143	144	165	145	127	93	92	111	121	138
241	Metabolite_241	12.76	111.091	FALSE		681	999	701	745	612	907	869	807	1620	612	681	3439	607	801	591	1524	619	923	614	724	1925	955	705	2088	1279	627	901	570	620	726	610	612	1715	1155	716
242	Metabolite_242	8.46	111.117	FALSE		817	675	740	628	532	677	928	585	577	590	649	1013	737	211	688	896	739	564	416	750	960	642	1043	1018	652	291	662	799	617	708	506	697	954	983	277
243	Metabolite_243	8.39	111.117	FALSE		817	675	626	628	532	677	928	559	577	590	649	668	737	211	688	614	739	564	416	750	803	642	808	657	652	291	662	681	617	708	506	697	954	999	277
244	Metabolite_244	10.86	111.117	FALSE		3370	1551	3624	3282	2615	988	4085	1537	3055	3249	1590	5698	2965	1107	3462	1641	971	1465	864	1661	5176	1281	4310	4590	3117	1980	1100	4237	3556	1463	1285	2239	3689	3822	3022
245	Metabolite_245	8.64	111.117	FALSE		1175	570	1183	991	701	908	1262	902	751	892	1053	1661	904	457	885	1281	827	805	774	1042	1628	916	917	1561	950	439	974	1237	893	1034	717	707	742	1738	515
246	Metabolite_246	12.85	111.521	FALSE		8199	8852	9795	9264	8961	8214	3347	9038	9015	8666	9419	10039	8874	8445	9082	9596	5165	9390	9466	9080	10228	3903	8534	9725	3444	8777	9120	8895	9100	9183	9105	8616	9858	9121	8548
247	Metabolite_247	9.44	111.523	FALSE		736	809	791	746	847	1050	662	820	710	771	794	934	898	725	861	1098	820	801	826	609	1028	817	748	767	706	635	670	673	855	919	690	854	879	731	801
248	Metabolite_248	13.35	111.967	FALSE		457	485	531	550	460	496	489	608	675	573	442	469	630	480	542	353	480	542	513	601	583	487	492	627	465	574	503	458	488	536	504	457	398	449	497
249	Metabolite_249	0.72	112.007	FALSE		6612	7617	7445	6733	6812	6340	5872	6777	6708	6581	11942	12434	11706	10661	11231	4403	4777	4356	4573	4821	4247	4676	4058	4821	4323	2024	1944	1865	2099	1755	8864	8263	7529	7471	7721
250	Metabolite_250	12.84	112.017	FALSE		28507	30611	13748	31434	13783	26884	3648	3377	2268	29043	15655	33445	32189	28336	3562	32579	11554	15863	15711	32300	32869	3602	13034	3365	31030	3239	15292	15614	30611	3645	14567	28860	15872	32120	13872
251	Metabolite_251	10.93	112.017	FALSE		735	889	747	702	787	711	1043	765	850	931	803	1236	939	939	1031	899	608	941	885	1050	1627	849	1024	1269	993	1017	785	1031	934	1281	802	761	895	942	783
252	Metabolite_252	10.71	112.019	FALSE		1750	2141	2267	1868	1997	2124	1934	1887	2159	1787	2023	2336	1958	2286	2114	2414	1920	1889	2316	1806	2235	1779	1628	2532	1997	1771	1894	2238	2173	2080	2042	1490	1871	2369	1704
253	Metabolite_253	12.81	112.019	FALSE		27548	29648	29873	30147	29304	25792	28816	29058	29339	28428	29639	32365	30047	27656	30054	31901	25330	30792	29794	30916	31893	29620	28979	32449	29838	27558	30986	29718	29894	30664	29218	28245	32488	31246	30091
254	Metabolite_254	9.05	112.018	FALSE		1921	2112	1604	1558	1747	1418	1234	1764	1537	1687	1206	1306	1815	1592	1633	1539	1271	1200	1650	1293	1365	1278	1271	1527	1216	1729	1407	1627	1330	1072	2280	1886	2540	2098	2038
255	Metabolite_255	10.83	112.017	FALSE		1942	1907	1755	1505	1982	1533	1623	1884	1997	1852	1652	2135	1896	1525	930	2054	1234	1748	1940	1638	1887	2126	1975	2369	1634	1621	2231	2379	1804	2037	1760	2036	1014	1989	1717
256	Metabolite_256	10.48	112.019	FALSE		1651	1561	1424	1449	1528	1302	1826	1895	1414	1246	1753	1525	1544	1585	1555	1883	1377	1542	1786	1391	2247	1573	1583	1688	1138	1216	1480	1304	1843	1720	1973	1273	1988	1685	1691
257	Metabolite_257	10.59	112.022	FALSE		1549	1654	1566	1482	1714	1628	1831	1313	1435	2014	1871	1545	1981	1518	1590	1990	1447	1706	1711	1414	1529	1241	1305	1666	1369	1636	1453	1530	1637	1360	1821	1659	2112	1932	1640
258	Metabolite_258	0.97	112.05	FALSE		337	439	478	406	352	312	303	305	302	322	711	809	580	610	594	228	226	250	218	312	129	258	135	197	159	170	183	224	170	181	520	600	627	404	595
259	Metabolite_259	11.26	112.085	FALSE		1001	244	215	219	294	939	242	271	254	270	310	294	311	1065	295	397	982	257	266	236	294	304	1099	309	395	924	220	274	208	278	339	288	306	299	1069
260	Metabolite_260	0.81	112.086	FALSE		84	71	93	76	75	101	56	70	87	73	108	52	85	74	78	124	143	128	102	138	108	84	129	100	101	598	649	519	799	551	74	54	63	100	74
261	Metabolite_261	12.68	112.088	TRUE	112.08609:123	3812	433	437	486	765	3776	643	495	706	555	608	685	660	3866	592	447	3223	604	585	485	612	500	3609	523	422	3746	547	724	597	566	621	827	434	580	4421
262	Metabolite_262	11.61	112.087	TRUE	112.08205:20	1841	390	326	339	375	1252	324	286	276	281	278	363	332	1272	380	268	837	363	297	288	403	327	1669	291	267	1175	337	379	256	307	339	287	366	422	2011
263	Metabolite_263	11.4	112.087	TRUE	71.05912:19 111.09215:20	1409	247	319	345	302	1103	304	334	252	256	319	299	294	1328	388	256	1006	286	333	289	261	235	1406	304	395	1166	257	336	232	333	291	374	329	289	1190
264	Metabolite_264	11.49	112.087	TRUE	111.09145:50 112.08337:42 112.0984:18	2090	390	335	345	318	1820	322	354	363	295	323	299	321	1272	376	272	839	381	336	260	403	327	1400	319	251	1169	330	367	253	333	310	411	349	309	1842
265	Metabolite_265	12.85	112.519	FALSE		4570	4658	1581	5002	4917	4411	5144	4958	4627	4551	5036	5678	4960	4504	4913	5185	4163	5317	5000	4954	5534	4840	2613	5800	5095	4808	5025	4684	4884	5393	4765	4603	5645	5372	1479
266	Metabolite_266	0.76	113.01	FALSE		409	515	422	432	637	495	444	376	359	464	742	663	722	667	547	298	358	336	374	473	406	320	218	331	266	169	124	161	144	198	571	468	452	424	539
267	Metabolite_267	12.81	113.017	FALSE		4637	4843	4815	4669	4883	4664	4883	4934	4808	4783	5207	5200	4694	4546	5109	5562	4138	5322	4948	4975	5638	4933	4973	5587	4882	4767	5165	4892	4985	4947	4999	4811	5584	5263	5052
268	Metabolite_268	0.96	113.024	FALSE		618	934	580	526	572	422	356	395	362	375	468	684	499	727	530	384	460	400	352	410	366	420	380	391	419	840	731	683	671	728	643	598	600	659	614
269	Metabolite_269	1.82	113.035	TRUE	113.03577:23	2873	3132	3183	2429	2536	1126	921	1015	1146	1162	6344	6761	5854	6149	5806	1136	1087	1191	1172	1273	237	284	266	243	390	383	311	278	288	297	2316	1644	1517	1748	2557
270	Metabolite_270	3.35	113.041	FALSE		249	323	303	315	218	210	160	190	232	227	445	485	479	420	492	526	600	756	746	652	730	710	823	801	783	246	261	363	251	259	182	237	237	177	283
271	Metabolite_271	7.3	113.06	FALSE		454	688	545	489	449	409	522	569	617	502	661	679	619	596	622	727	454	623	624	568	646	457	829	1045	595	515	597	677	631	588	613	426	604	614	567
272	Metabolite_272	7.42	113.063	FALSE		489	671	797	583	430	465	551	566	654	475	611	744	630	596	645	856	408	646	610	663	758	656	691	707	664	659	629	610	813	726	480	433	600	734	676
273	Metabolite_273	13.38	113.966	TRUE	68.99332:41	1843	2031	2327	1868	1958	1629	1958	2079	2167	1862	2082	2497	1929	1766	1611	2155	1799	2331	2332	2105	2675	2086	2008	2075	2099	1911	2374	2013	2349	2403	2109	1758	2139	1833	1859
274	Metabolite_274	13.03	113.965	TRUE	72.93752:69 98.93482:21 113.96186:17 113.96842:16	4500	5103	5490	5492	5414	4327	5363	5709	5601	5459	5570	6083	5612	4518	5797	6120	4549	5865	5881	5534	5768	5348	4735	4301	5810	4676	5824	5507	5571	5656	5334	3919	6357	5945	4565
275	Metabolite_275	12.9	113.963	FALSE		2115	2383	2285	2320	2361	2235	2284	2286	2408	4866	5085	3106	2204	2411	5045	5484	3723	5144	4938	5208	5499	2205	4176	3214	5399	4223	2414	5411	5233	2470	2602	2285	3565	2982	2985
276	Metabolite_276	13.21	113.964	TRUE	113.94727:16 113.96511:68	1760	2339	2754	2591	2786	2072	2484	2535	2890	2764	2584	3055	2566	2546	2858	2412	1982	2884	2884	2578	2540	3014	1905	2481	2713	1889	2968	2792	2458	2828	2500	2984	3263	2468	2088
277	Metabolite_277	12.8	114.016	FALSE		1372	1324	1648	1431	1540	1329	1601	1522	1562	1278	1486	1535	1537	1436	1950	1372	1117	1278	1511	1698	1620	1407	1494	1490	1510	1373	1476	1524	1584	1399	1453	1325	1581	1629	1724
278	Metabolite_278	0.76	114.102	FALSE		51	63	70	63	71	41	59	71	52	64	78	139	112	81	76	86	100	98	82	83	93	85	70	70	79	390	436	448	425	469	621	898	680	637	823
279	Metabolite_279	13.24	114.977	FALSE		474	433	574	584	614	503	679	661	428	604	599	816	520	400	532	668	516	615	719	562	686	595	663	499	635	469	457	650	625	566	717	537	534	579	513
280	Metabolite_280	0.72	114.989	TRUE	82.0151:18 84.00386:20 109.95449:22 114.98328:24	7665	8550	8359	6995	6896	6704	6825	6767	7231	6435	12813	14015	12162	12273	14133	6244	4537	6382	5009	5114	4984	5401	4576	5470	4932	2170	2019	2107	2040	2141	9056	8875	11164	9335	9471
281	Metabolite_281	1.39	115.039	FALSE		566	532	525	506	780	638	467	563	655	545	313	267	313	307	255	169	212	159	204	206	223	158	268	154	209	79	103	95	87	101	309	401	284	273	304
282	Metabolite_282	2.13	115.04	FALSE		293	285	452	444	353	275	193	171	197	208	1003	1496	1223	1689	1431	197	139	126	140	128	149	198	150	334	181	85	80	93	142	131	210	118	138	137	121
283	Metabolite_283	0.9	115.039	FALSE		1662	1771	1922	1659	1824	610	1886	1489	1618	1865	1095	684	1414	571	546	915	860	876	834	761	864	1084	904	1014	857	526	596	599	587	588	1054	1124	929	915	999
284	Metabolite_284	2.54	115.039	FALSE		823	684	770	701	648	542	336	327	332	400	586	732	539	614	682	99	127	92	98	96	92	94	85	108	148	77	134	56	79	83	728	680	579	638	959
285	Metabolite_285	0.98	115.04	FALSE		1532	1539	1534	1433	1442	1624	1536	1332	1483	1620	1089	1126	1208	1061	1095	876	797	827	776	727	699	791	725	802	801	506	596	576	587	552	921	921	735	806	797
286	Metabolite_286	3.04	115.075	FALSE		727	772	737	677	708	422	399	355	436	348	701	509	547	555	623	781	793	607	578	699	807	824	737	789	860	272	204	221	202	260	1293	879	1083	1167	1222
287	Metabolite_287	4.39	115.076	FALSE		286	293	252	213	312	215	231	174	201	177	287	379	228	324	288	608	602	537	571	539	591	617	654	691	625	257	260	151	215	155	619	648	594	583	769
288	Metabolite_288	0.89	115.085	FALSE		175	138	168	231	187	418	342	577	468	479	105	146	98	127	127	91	118	143	110	137	105	133	131	161	110	298	360	305	284	278	146	130	212	125	115
289	Metabolite_289	11.27	115.088	TRUE	115.08187:20	1000	969	911	1329	927	1078	1115	1194	1054	1035	1230	1161	1195	905	1053	1379	932	1104	1265	1209	1097	902	1232	1181	1249	1195	1201	1280	1129	1204	1132	1142	1400	1454	1070
290	Metabolite_290	12.74	115.087	TRUE	74.06252:55 115.09155:24	1137	1221	1092	1111	1141	1454	1164	1165	1081	1081	1203	1402	1251	1273	1321	1257	1098	1495	1281	1578	1770	1081	1242	1417	1109	1188	1568	1538	1178	1223	1265	1181	1346	1454	1413
291	Metabolite_291	11.58	115.087	FALSE		1538	1500	1499	1403	1173	1185	1531	1404	1194	1340	878	741	1081	887	1182	1113	795	959	1216	1173	1099	1114	1006	900	924	866	952	1096	989	981	1317	1273	1642	1443	1324
292	Metabolite_292	12.62	115.088	TRUE	115.09132:59	906	1028	788	871	754	702	846	1056	945	757	932	880	920	824	1103	933	871	947	929	912	952	923	946	1010	1024	849	899	1072	956	832	824	965	776	1136	1115
293	Metabolite_293	12.37	115.09	FALSE		986	1019	841	656	1125	988	742	923	991	1031	963	829	966	938	760	949	747	813	998	978	1020	927	1016	1018	944	1022	931	830	1057	1086	990	741	1066	1035	1055
294	Metabolite_294	12.5	115.092	TRUE	115.09132:59	1022	1064	865	669	955	916	801	842	1012	779	868	933	979	963	1103	771	961	856	932	997	921	898	859	821	883	889	822	978	854	837	793	802	966	1046	787
295	Metabolite_295	11.78	115.092	FALSE		980	949	838	745	817	893	893	978	1023	920	915	1028	978	929	738	980	942	845	936	1000	1077	1036	737	921	714	841	1084	864	977	906	846	940	1012	1134	894
296	Metabolite_296	11.41	115.089	FALSE		1193	992	1070	1213	1001	832	842	1053	1051	955	998	971	805	865	1142	1344	832	867	1183	1378	969	998	1092	795	1154	1144	1178	1085	1071	902	1120	1111	1114	1198	991
297	Metabolite_297	12.82	115.965	TRUE	115.06424:20	1445	1639	1710	1718	1698	1386	1814	1530	1653	1575	1372	1690	1637	1542	1726	1582	1436	1704	1620	1727	1724	1590	1409	1622	1707	1518	1550	1677	1624	1615	1614	1485	1676	1549	1365
298	Metabolite_298	0.72	115.989	FALSE		1171	1402	1209	1166	1149	1298	994	1198	1149	1169	1914	2138	2275	1977	2261	933	826	968	753	762	842	1114	912	945	815	494	566	414	458	361	1606	1419	1987	1422	1742
299	Metabolite_299	0.85	116.034	FALSE		3064	2812	2524	2777	2817	1392	1430	1381	1424	1407	2453	3205	2500	2618	2494	2866	2542	2887	2774	2947	1398	1450	1508	1645	1404	4371	3636	4437	4235	4375	2747	2223	3045	2857	2690
300	Metabolite_300	12.77	116.07	FALSE		324	382	510	463	524	307	468	484	507	439	404	749	946	450	521	941	282	839	408	355	532	505	353	482	518	280	365	395	367	344	400	288	636	445	222
301	Metabolite_301	0.95	116.072	TRUE	70.06572:195 72.07961:54 116.06927:119	34943	35861	32418	32484	32566	19210	19363	19873	20652	21048	41734	47381	42100	44528	43186	20414	19368	20663	21526	21039	25681	26717	26407	29538	26387	18595	18576	16722	16705	18914	16787	15190	15558	15346	17947
302	Metabolite_302	0.8	116.07	FALSE		770	763	776	759	705	778	625	629	762	832	210	204	198	321	162	546	717	873	578	793	396	460	436	511	449	3947	3714	4304	4028	3925	600	552	510	680	688
303	Metabolite_303	1.08	116.07	FALSE		8940	9946	8174	2602	1780	5463	4451	5417	4994	5254	10743	11758	9780	3760	9723	6591	5833	5854	5165	5105	7549	7796	7254	9049	6691	4253	4813	4235	4085	4912	4306	3705	3997	5472	6167
304	Metabolite_304	0.72	116.986	FALSE		1172	1405	1455	1115	1074	1056	1066	1022	1068	1106	2128	2158	1991	1995	2556	1139	693	999	829	818	891	936	844	1010	911	537	472	495	439	429	1610	1409	1709	1488	1700
305	Metabolite_305	0.97	117.063	FALSE		2621	2662	2338	2323	2461	1590	1279	1713	1807	2016	3345	3272	2907	3357	3452	1892	1639	1935	1942	1792	2419	2016	2167	2489	2344	1678	1171	1143	1470	1712	1527	1482	1112	1382	1733
306	Metabolite_306	13.61	117.938	TRUE	74.95184:18 100.93613:23	974	1008	973	1138	970	905	889	976	792	901	1131	1087	966	851	1156	1208	781	1048	1363	864	1042	1133	878	1099	951	1024	885	966	991	969	1093	1066	1054	917	1126
307	Metabolite_307	0.65	117.936	FALSE		784	801	865	979	794	802	749	848	796	961	758	792	776	950	823	921	1004	967	861	907	872	927	907	872	863	764	1061	977	797	929	895	968	775	843	891
308	Metabolite_308	13.38	117.935	TRUE	60.04703:25 100.9307:19	1023	1012	1323	1345	1317	1056	1306	1103	1240	1015	1201	1180	1066	1020	1180	1036	1018	1222	1115	1194	1532	1145	941	1207	1305	939	1057	1142	896	1221	866	1252	1170	1126	1072
309	Metabolite_309	13.73	117.938	TRUE	69.11734:16 72.94408:22 74.95308:27	852	1092	1022	1146	879	953	960	1163	869	992	1035	1053	985	961	942	1202	957	987	1277	827	1008	808	1138	1302	795	1024	1048	952	845	837	1159	1066	1233	746	1169
310	Metabolite_310	13.5	117.937	TRUE	99.93619:24 115.96009:32	864	1011	1207	1274	942	998	1004	1007	843	1031	1208	1174	1139	770	1327	1093	712	1247	916	1179	1264	1302	1033	924	1227	1178	1029	1119	1096	1171	1033	1082	1094	1003	907
311	Metabolite_311	12.81	117.96	FALSE		611	684	782	700	779	679	773	697	660	800	674	726	694	679	726	816	650	719	708	582	615	681	679	698	662	729	724	780	681	695	720	721	681	672	547
312	Metabolite_312	1.3	118.087	TRUE	72.07626:24 72.08199:37 118.08538:23	1989	2139	2037	2068	2009	3097	3021	3086	3092	3155	2605	2544	2488	2276	2241	2764	2680	2532	2985	2979	3093	2681	2810	3252	2945	3248	2902	2697	2711	3277	1157	1122	1337	1037	1589
313	Metabolite_313	1	118.087	TRUE	72.07889:18 73.02542:17 84.04264:29	4530	4400	4499	4142	4074	7231	6462	7174	6864	7297	3854	4583	3946	4500	3737	8207	8184	8121	7854	7822	9659	8924	9734	10909	8401	9230	8597	7529	8717	10366	2723	2608	2809	2692	3565
314	Metabolite_314	0.89	118.086	TRUE	59.07064:16 102.05505:16 118.06147:17 118.08517:1368 118.1373:17	2574	2247	2305	2475	2286	2205	1737	1994	2057	2017	1290	1239	1174	1562	1269	13613	12968	12336	14211	11437	25168	24693	25989	27183	23780	3201	2344	2958	2985	2468	3370	3320	3702	3562	4220
315	Metabolite_315	12.77	118.086	FALSE		318	361	333	328	328	292	207	346	172	291	249	238	376	198	254	314	304	382	419	303	377	437	218	584	383	288	225	256	260	334	343	295	277	281	188
316	Metabolite_316	13.6	118.944	TRUE	100.93277:87	1231	1420	1086	1366	1119	1073	1147	889	1352	1279	1050	1386	1301	989	1082	1166	963	1155	1027	1026	1215	1390	1373	1264	1532	1343	1060	1662	1401	869	1411	1309	1171	1325	1437
317	Metabolite_317	13.48	118.942	TRUE	100.92915:20 100.93852:21	1460	1770	1453	1629	1444	1301	1350	1432	1510	1222	1541	1850	1174	1449	1583	1458	1365	1434	1350	1424	1699	1491	2104	1681	1425	1830	1290	1297	1512	1445	1382	1304	1628	1559	1788
318	Metabolite_318	0.66	118.941	FALSE		937	955	877	826	733	932	816	1160	978	798	1007	961	961	1040	890	982	735	1056	919	824	1156	823	871	925	871	757	887	791	775	904	902	915	1085	1227	1096
319	Metabolite_319	13.72	118.945	TRUE	73.9397:42	1197	1450	1189	1375	1327	1079	1377	1141	1197	1330	1291	1172	938	1223	1064	1136	1027	1494	1039	1256	1202	1294	1256	1427	1511	1527	1280	1336	1144	927	1248	912	1419	1521	1204
320	Metabolite_320	13.88	118.947	TRUE	83.92902:17 89.94573:23 100.93816:43	1137	1291	1189	1284	1100	1101	1231	1141	1205	1232	1246	1212	1098	1374	1515	1233	1239	1479	1267	1312	1448	1162	1158	1314	1208	1390	1165	1157	1079	832	1129	1380	1205	1112	1132
321	Metabolite_321	0.73	119.02	FALSE		490	301	322	359	177	244	502	261	309	328	633	515	422	526	534	363	135	319	347	261	252	453	399	183	366	135	116	177	139	129	339	226	833	617	238
322	Metabolite_322	0.93	119.035	FALSE		640	683	685	673	608	915	904	721	816	734	1635	1796	1556	1748	1588	427	412	386	363	283	424	621	352	342	325	386	337	248	316	223	410	516	463	555	764
323	Metabolite_323	4.13	119.049	FALSE		535	634	535	622	562	545	605	595	710	605	121	146	104	142	146	146	57	109	131	79	85	131	92	173	81	78	55	46	78	64	75	89	89	98	87
324	Metabolite_324	4.25	119.049	FALSE		435	513	530	617	527	772	694	634	753	655	108	152	201	177	159	146	62	105	56	83	68	90	69	90	98	82	46	52	52	71	80	75	77	98	87
325	Metabolite_325	1.83	119.05	TRUE	119.04919:38	603	698	630	630	569	428	458	500	488	487	632	594	548	610	546	1165	1290	1225	1226	1236	1270	1385	1057	1298	1365	2002	1680	1695	1707	1762	471	344	383	367	504
326	Metabolite_326	0.89	119.088	FALSE		269	243	335	243	236	389	294	389	400	469	229	283	144	256	264	1240	1140	940	993	804	1823	1995	1817	2154	1663	383	629	355	500	477	297	405	285	276	426
327	Metabolite_327	0.99	119.089	FALSE		373	453	413	522	475	530	739	602	565	518	364	499	272	363	334	1223	1124	940	993	966	1789	1956	1799	2090	1597	684	637	559	639	728	297	405	291	295	426
328	Metabolite_328	0.87	120.067	TRUE	74.06069:43 120.05408:20 120.0687:53	4538	4502	4256	4372	4238	5245	5144	5180	5334	5027	2914	3195	2901	3213	2691	5097	4693	4804	5081	5001	5524	5308	5415	6190	5113	6261	5673	5034	5502	6405	2625	2928	3077	2897	3681
329	Metabolite_329	2.35	120.082	TRUE	77.0413:37 91.05327:49 93.06586:66 93.07659:34 100.67857:17 102.04235:16 103.05115:130 104.05928:17 120.08106:1382	31974	32147	32533	31299	30685	33229	30735	32175	35071	33241	36034	38642	37103	39792	36538	13031	13924	14004	13069	12826	20055	20695	20909	22232	21301	22135	21197	18712	21012	25279	23971	25657	20877	20144	27356
330	Metabolite_330	0.98	121.029	FALSE		511	472	588	509	438	585	503	550	646	546	1140	1281	1257	1222	1316	192	176	304	185	205	241	222	203	277	254	254	111	166	235	194	719	686	773	567	641
331	Metabolite_331	3.07	121.029	FALSE		259	231	197	260	212	158	101	140	169	115	145	171	147	185	140	580	551	547	460	462	621	659	684	795	787	837	588	751	723	569	320	332	271	267	342
332	Metabolite_332	1.21	121.03	FALSE		953	1027	864	995	918	988	1267	978	1124	1065	1636	1550	1207	1718	1511	245	241	241	260	293	187	172	215	228	222	130	131	111	83	126	969	1246	1177	1256	1149
333	Metabolite_333	1.7	121.043	FALSE		603	652	788	647	600	906	756	782	725	810	1108	1198	1023	996	848	235	171	214	189	188	342	421	319	465	361	226	197	262	278	192	328	187	285	239	237
334	Metabolite_334	2.35	121.084	FALSE		3291	3797	3806	2933	2863	3415	3363	3497	3677	3602	4181	3880	3414	4001	3782	1438	1447	1478	1277	1610	2492	2208	2037	2110	2123	2759	2369	2053	2281	2873	2747	3063	2015	2050	3003
335	Metabolite_335	10.65	121.102	TRUE	93.06877:30	695	604	812	671	647	641	591	558	524	627	267	195	270	259	362	266	328	391	510	354	117	132	118	105	102	95	94	100	67	83	1476	1816	1402	1682	1092
336	Metabolite_336	10.26	121.101	FALSE		331	495	320	405	417	524	387	329	298	390	284	154	226	274	224	214	289	341	296	289	114	108	110	114	109	93	119	106	118	83	804	1019	875	952	754
337	Metabolite_337	2.35	122.027	FALSE		430	559	516	581	559	302	275	242	364	344	610	688	570	737	601	152	156	203	157	147	106	115	90	121	107	91	70	90	71	81	758	723	672	673	941
338	Metabolite_338	3.16	122.028	FALSE		119	131	119	120	124	119	135	114	235	123	664	783	683	785	696	310	259	243	197	256	131	150	150	184	175	145	120	81	167	100	76	135	95	69	111
339	Metabolite_339	2.65	122.097	TRUE	79.05283:20 105.06516:40 105.07756:80 122.09291:20	59	65	62	86	47	101	115	88	87	82	64	128	82	79	68	109	79	97	60	66	67	137	65	75	77	78	63	109	44	82	1974	3120	2491	1798	2324
340	Metabolite_340	0.8	122.925	TRUE	122.91984:17	19837	21414	20858	19799	19231	19827	20164	19659	21163	20247	23884	23776	23247	23832	23362	12033	12050	11300	12428	11721	10656	10535	10306	11327	10648	894	777	612	722	695	18519	18650	17723	17776	18577
341	Metabolite_341	3.35	123.011	FALSE		391	423	495	359	309	214	225	272	368	251	575	562	518	721	556	672	968	849	950	899	1146	1090	1140	1121	1084	251	272	241	290	250	246	242	249	270	268
342	Metabolite_342	3.14	123.045	TRUE	123.04284:89 123.0492:53 123.08978:22	2256	2196	2006	2475	2284	850	809	706	924	819	1009	845	857	1087	832	957	1298	1007	1114	1111	1847	2217	1945	2226	1961	417	307	409	331	299	1670	1919	1621	1694	1825
343	Metabolite_343	4.11	123.043	FALSE		235	246	224	253	213	210	155	228	238	189	213	226	239	257	246	261	293	343	315	225	889	1086	820	1051	975	177	109	130	134	124	460	398	366	308	249
344	Metabolite_344	3.24	123.045	TRUE	95.05049:49 121.06274:49 123.041:16	1341	1104	1011	2605	2328	623	848	898	1200	942	1196	1289	1125	1331	1070	1013	1076	985	949	912	1338	1512	1403	1438	1487	461	340	409	391	334	1761	1881	1348	1482	2007
345	Metabolite_345	4.71	123.045	FALSE		373	465	488	548	471	426	371	245	350	264	238	260	245	255	236	125	165	140	157	145	176	183	150	151	146	165	89	181	121	108	1076	609	585	687	719
346	Metabolite_346	3.75	123.044	FALSE		598	724	544	695	632	398	364	381	338	337	457	365	315	386	378	473	394	505	511	425	361	375	337	505	420	231	292	230	208	211	672	430	749	656	845
347	Metabolite_347	2.48	123.045	FALSE		522	639	484	583	519	639	457	611	435	505	333	541	499	502	445	346	287	310	328	425	435	485	498	578	491	208	215	208	242	195	649	907	665	634	739
348	Metabolite_348	2.34	123.044	FALSE		634	929	843	749	667	637	587	566	586	510	623	661	718	681	642	312	232	223	243	224	236	195	248	196	200	172	116	116	174	151	629	705	659	716	676
349	Metabolite_349	1.82	123.046	TRUE	123.04401:43	1407	1702	1861	2228	1565	1651	1462	987	1545	1618	1388	2123	1904	2389	2119	1908	1896	1937	2098	1961	1953	2071	2001	2071	1966	2910	2674	2642	2735	3211	1171	1086	679	1111	1484
350	Metabolite_350	3.44	123.044	TRUE	123.0405:16 123.04721:17	696	812	773	692	712	690	604	656	820	681	362	327	315	443	364	274	347	339	397	425	575	669	559	632	595	139	142	219	133	129	2490	1994	2234	1950	2690
351	Metabolite_351	1.52	123.056	TRUE	55.21032:16 68.99389:18 80.04543:17 80.04897:46 81.04837:26 81.71012:16 96.04767:17 106.02892:16 106.03388:20 107.0322:17 123.05479:2106	27474	26073	25216	25170	24095	12336	10452	10484	11680	10833	50787	58089	52809	55001	51482	1843	2025	1030	1066	1339	790	824	761	741	706	712	547	605	686	562	3991	4684	3772	3733	6169
352	Metabolite_352	0.97	123.056	TRUE	66.82406:16 78.03101:36 78.03717:58 79.03596:36 80.04923:252 81.05043:26 81.92297:19 102.0581:28 106.02757:839 107.02577:16 122.25814:16 123.05537:4557 123.08331:16 123.11042:16	92963	100192	89105	89035	91186	61201	54433	53458	59352	57052	70622	78011	71532	77676	68519	6897	8144	6244	6677	6581	1131	933	843	1156	935	1058	412	356	633	422	18003	25600	18212	13776	24537
353	Metabolite_353	1.16	123.056	TRUE	78.03578:57 79.96215:47 80.04461:23 80.05115:55 80.13798:17 106.0282:100 106.03508:21 123.04225:18 123.05577:766 123.09226:16	17194	17269	15762	16387	15293	13559	11244	11800	12170	11902	16428	18385	17044	19155	16641	1838	1998	1457	1722	1642	413	322	325	417	314	535	182	182	253	200	3917	6363	4385	3712	5695
354	Metabolite_354	12.78	123.055	FALSE		1754	1401	1098	1410	1385	1207	1056	784	1048	1220	1330	1096	1192	1588	1322	637	817	496	738	712	606	686	700	246	618	834	629	635	721	670	631	764	405	446	650
355	Metabolite_355	5.96	123.08	FALSE		661	659	772	721	564	629	645	662	543	587	711	967	677	691	778	937	766	639	534	677	874	692	956	776	654	758	651	642	600	826	542	445	776	861	907
356	Metabolite_356	6.31	123.081	FALSE		543	486	554	669	537	393	577	403	407	492	501	728	612	599	555	712	594	527	544	571	758	525	728	673	621	682	577	470	492	589	408	366	598	698	660
357	Metabolite_357	10.93	123.117	FALSE		693	656	748	748	656	663	545	699	687	757	576	307	453	489	479	389	432	367	511	465	305	380	427	414	352	329	305	227	270	235	1201	1139	1143	1288	1102
358	Metabolite_358	10.54	123.118	TRUE	81.06644:16 83.08822:26 93.06766:28 123.1108:19 123.1199:19	471	583	594	623	625	556	496	464	575	592	322	155	288	258	279	234	304	264	310	307	85	145	162	113	140	156	93	77	94	91	1283	1941	1600	1959	1482
359	Metabolite_359	11.04	123.117	FALSE		571	505	501	534	616	504	419	478	488	498	560	349	673	888	891	366	414	347	332	361	317	380	427	381	332	295	305	274	253	235	894	782	996	1026	958
360	Metabolite_360	10.26	123.117	FALSE		216	304	236	390	240	292	257	186	274	269	203	140	166	141	217	209	217	207	269	237	118	135	109	209	162	130	74	87	128	108	538	699	741	717	650
361	Metabolite_361	1.41	124.04	TRUE	121.78343:16 123.05598:121 124.04073:143	4195	3518	4295	3693	3620	1517	1389	1358	1411	1410	3021	3473	3166	2996	3062	819	782	744	828	704	283	349	230	303	269	293	286	311	236	216	1189	747	965	1119	1121
362	Metabolite_362	1.52	124.058	FALSE		2019	3152	2008	3143	3200	1311	1294	1255	946	1515	3245	4508	4132	4323	4045	633	851	923	581	713	272	224	153	202	176	259	136	292	131	198	1080	633	1058	941	1053
363	Metabolite_363	0.97	124.047	FALSE		7930	8405	6885	7327	7121	4846	5168	4825	4835	4461	6354	5916	5166	5864	5711	1102	1217	1030	929	1012	783	509	508	559	555	550	516	579	592	506	2032	2844	2031	1633	2797
364	Metabolite_364	12.78	124.087	FALSE		563	553	686	428	487	498	450	472	508	584	562	498	564	659	590	555	669	571	519	487	550	440	444	537	526	510	658	605	489	549	578	461	561	704	539
365	Metabolite_365	0.8	124.924	FALSE		2888	3238	3110	3095	2904	2913	2799	2921	3204	3185	3531	3439	3379	3403	3407	1780	2002	1599	1765	1855	1630	1540	724	1644	1733	261	152	164	136	159	2800	2703	2651	2616	2764
366	Metabolite_366	2.04	125.022	FALSE		516	377	304	524	417	356	311	347	389	319	639	501	715	604	596	131	139	129	100	122	110	163	154	124	83	114	76	78	92	123	274	321	287	280	387
367	Metabolite_367	2.46	125.061	TRUE	80.05908:20 110.00349:17 125.05806:26	1498	1316	1376	1321	1342	1179	1051	970	995	1045	177	177	219	209	202	267	402	387	330	371	335	352	367	367	290	192	144	165	152	208	4113	3788	2824	3108	4008
368	Metabolite_368	11.05	125.06	FALSE		1411	1224	973	1116	1548	2124	1535	1536	2174	1955	460	259	481	390	626	221	311	197	300	278	236	307	291	373	314	239	257	165	205	165	900	808	615	761	543
369	Metabolite_369	0.97	125.06	FALSE		695	841	776	790	661	620	548	538	646	769	997	925	789	820	655	205	233	184	200	252	109	116	194	123	220	188	134	124	165	128	468	433	597	366	541
370	Metabolite_370	0.73	125.987	FALSE		1312	1469	1376	1558	1428	1698	1624	1795	1954	1861	1588	1643	1534	1238	1440	2425	1821	2472	2071	2339	3463	2371	2981	3509	2979	1156	869	805	1206	585	2335	1543	2749	3174	3455
371	Metabolite_371	12.8	125.982	FALSE		1225	1084	1263	1116	647	1238	588	1195	1186	1203	1266	1269	1200	1421	1146	1289	1195	687	1230	622	1263	1259	1283	1189	1306	1283	1232	1333	1291	1373	1210	1248	1361	1233	1412
372	Metabolite_372	0.95	126.055	FALSE		261	282	218	231	289	197	173	252	178	219	252	226	196	199	242	617	648	685	598	693	756	644	638	761	588	375	311	232	337	457	256	275	240	309	343
373	Metabolite_373	12.96	126.973	TRUE	112.96551:17 113.97024:17	1467	1069	1380	1571	1246	1163	966	1270	1547	1335	992	1556	1134	1238	914	1114	1240	1353	1074	1591	1211	1502	1257	1589	1364	1382	1255	1368	1294	1076	1357	1557	1494	1456	1427
374	Metabolite_374	0.76	127.023	FALSE		313	290	250	326	256	379	307	331	284	312	378	307	455	570	346	200	347	303	249	217	216	222	400	193	331	262	155	166	207	149	884	740	1118	1019	1071
375	Metabolite_375	4.65	127.04	TRUE	125.0234:30	192	253	254	216	237	245	266	213	285	241	157	151	212	220	132	200	182	200	205	196	219	285	322	250	219	163	140	141	142	168	3900	4949	4595	3883	4341
376	Metabolite_376	4.14	127.04	FALSE		312	509	313	407	333	206	233	228	423	194	202	173	149	258	231	249	204	244	266	245	289	245	224	250	258	143	150	178	159	171	2409	2785	2119	1937	2510
377	Metabolite_377	4.01	127.038	FALSE		358	308	300	448	283	364	374	360	423	283	231	139	206	292	248	249	297	308	297	234	255	237	269	283	286	230	250	156	189	171	837	1046	791	761	1179
378	Metabolite_378	2.05	127.04	TRUE	109.02843:119 110.02731:16 127.03632:40	4328	3440	3175	3027	2544	2827	2063	2342	2611	2166	5300	5838	5026	6303	5259	556	751	636	622	640	637	429	395	510	396	266	243	228	275	285	2141	1789	1423	1337	2889
379	Metabolite_379	0.95	127.04	TRUE	71.05081:16 84.04296:116 84.08045:388 109.02779:57 111.03864:27 112.08612:18 127.03938:29	6226	3355	3401	3099	6801	6508	5684	5956	6481	5771	4724	4827	7071	4014	4470	4714	11039	11427	11477	4577	12481	12239	12208	13366	11959	1807	6902	6890	6750	1573	3428	3765	3429	937	8122
380	Metabolite_380	1.1	127.039	FALSE		3756	4142	3316	3921	5132	6508	5470	6218	6348	7123	2694	2876	2451	1922	2280	2510	5077	5293	5376	5882	4447	5963	5927	6714	6076	3065	3165	3567	3429	3241	2340	5453	5812	5435	5507
381	Metabolite_381	1.92	127.04	TRUE	69.03157:33 81.0316:67 109.02915:16 127.0415:53	3813	4143	3717	4461	4201	5706	4753	5894	5376	5597	1494	1306	1508	1972	1222	909	1057	853	1003	835	699	798	740	752	775	559	433	501	418	556	2136	2120	2229	2296	3010
382	Metabolite_382	4.29	127.039	FALSE		545	638	627	541	625	523	377	368	485	441	245	336	278	270	259	301	305	378	290	313	373	360	379	416	460	175	148	178	142	168	1429	1670	1212	1104	1543
383	Metabolite_383	1.79	127.04	TRUE	69.03654:28 109.03513:43 112.02341:16 127.04433:45	1571	1645	1720	1895	971	3278	1397	2983	2842	3250	466	528	716	543	612	335	502	475	529	458	387	521	429	405	589	307	286	247	295	389	1695	1257	1583	1616	1690
384	Metabolite_384	3.31	127.04	FALSE		563	424	538	306	365	393	335	345	420	370	248	275	255	253	203	449	608	515	533	351	559	794	612	677	698	318	305	199	339	241	339	453	394	341	590
385	Metabolite_385	2.28	127.046	TRUE	97.02699:21 127.03824:43	870	826	831	841	645	812	668	700	764	761	917	842	794	1207	873	1388	1178	1038	1398	1149	2268	2466	2289	2709	2149	356	254	301	331	336	1092	1134	828	888	1413
386	Metabolite_386	3.03	127.06	FALSE		1115	1226	1306	992	1111	1107	1197	908	1026	887	483	492	514	469	420	286	337	336	429	401	333	397	359	327	360	294	266	232	261	390	509	558	516	526	592
387	Metabolite_387	1.25	127.045	TRUE	81.03694:27 84.04169:16 84.05097:17 84.08308:44 89.94411:22 96.96362:16 109.03301:20	1784	1831	1754	1920	1914	2526	2943	3419	3029	2726	1294	1398	1092	1488	1106	2070	2009	2201	1793	1717	2187	1921	1749	2376	2073	1117	1222	994	1017	957	1412	1446	1618	1490	1975
388	Metabolite_388	2.6	127.075	FALSE		202	231	191	238	190	279	225	189	303	265	173	124	102	132	92	88	80	138	115	96	153	113	89	116	94	87	92	110	84	89	1306	1477	1338	1303	1570
389	Metabolite_389	2.44	127.076	TRUE	111.04887:19 127.04653:17	290	315	306	373	282	452	355	358	454	588	106	102	101	118	173	138	153	233	125	172	157	145	166	229	157	83	92	86	97	89	2025	1916	1940	1820	2238
390	Metabolite_390	3.03	127.075	FALSE		974	1028	1064	1006	938	991	1012	929	927	809	262	280	280	230	244	106	146	101	123	103	106	80	133	112	104	111	110	97	77	87	238	169	202	157	260
391	Metabolite_391	11.07	127.111	FALSE		723	612	622	695	679	707	645	577	519	660	748	626	746	744	709	675	647	614	698	639	657	678	672	619	684	718	594	724	652	637	573	602	678	618	623
392	Metabolite_392	0.72	128.02	TRUE	67.02036:18 68.01483:36 68.98302:78 69.98262:20 70.97976:20 82.01559:17 83.01553:21 86.9905:16 86.99535:22 87.99337:17 88.98679:24 93.39681:23 110.00732:807 110.92397:19 111.00169:21 111.00667:47 111.01247:76 112.00758:120 112.25134:17	11798	13436	13292	11959	11783	11411	11134	11678	11951	11362	19357	21135	18540	18442	18018	9025	9025	8758	9078	8522	8616	8796	8219	9737	8448	4547	4138	3848	3995	3836	13930	14163	14536	14576	15482
393	Metabolite_393	0.97	128.041	FALSE		822	806	965	731	877	1155	1156	1066	1166	1158	707	597	659	892	615	1134	1075	1062	978	1055	1060	1069	1050	1084	1131	656	631	636	584	942	1087	998	911	1096	893
394	Metabolite_394	2.06	128.07	FALSE		350	320	270	258	300	438	329	212	336	392	201	146	247	253	131	122	126	172	123	144	165	118	123	127	140	71	82	82	58	48	553	545	348	408	708
395	Metabolite_395	13.3	128.953	TRUE	72.9345:36 96.9574:49 96.96425:17 112.95499:17 113.95111:17 113.9651:20	1113	1223	1424	1458	1531	1093	1447	1142	1701	1226	1150	1412	1370	1144	1417	1204	1264	1418	1124	1200	1643	1255	1083	1214	1221	1352	1317	1390	1244	1243	1218	1434	1269	1290	1156
396	Metabolite_396	1.7	128.954	FALSE		515	339	466	367	484	475	453	542	513	474	377	334	352	339	379	716	711	718	597	646	672	769	722	609	512	740	837	706	679	609	598	480	629	510	541
397	Metabolite_397	13.42	128.954	TRUE	112.90182:20 113.96419:54	1421	1139	1448	1370	1057	1242	1285	1085	1343	1321	1273	1516	1436	1126	1482	1330	1458	1153	1256	1179	1268	1379	1329	1173	1276	1536	1510	1439	1382	1325	1235	1420	1082	1162	1159
398	Metabolite_398	13.22	128.954	TRUE	68.99905:20 86.84476:16 96.96362:32 96.96976:17 112.95902:19 113.97128:74 122.97168:22	1423	1556	1833	1914	1561	1251	1906	1555	1727	1616	1885	1801	1463	1517	1667	1708	1568	1714	1616	1816	1778	1619	1322	1503	1864	1605	1938	1694	1898	1761	1535	1666	1595	1733	1454
399	Metabolite_399	13.08	128.951	FALSE		1734	1740	1569	1645	1681	1786	1963	1508	1596	1607	1923	1695	1604	1884	1917	1787	1863	2096	1929	1731	1998	1550	1168	1681	1712	2311	2233	1454	2657	2207	1573	1535	1178	1511	1325
400	Metabolite_400	2.26	128.951	FALSE		905	615	751	527	528	573	670	726	635	664	535	504	470	506	646	1017	829	930	1113	1021	874	977	820	796	952	846	699	821	714	795	526	609	882	537	617
401	Metabolite_401	0.75	128.951	FALSE		1082	1044	1073	1180	1060	977	1153	920	1140	1291	1073	974	947	1135	934	966	1105	1029	1096	1112	928	977	1275	941	1092	895	1114	976	1055	1075	1057	1188	1113	1191	1184
402	Metabolite_402	2.83	128.953	FALSE		716	522	714	565	630	560	814	701	602	648	669	619	614	519	587	853	768	799	910	825	852	661	644	760	619	766	743	890	843	864	592	673	738	649	750
403	Metabolite_403	1.99	128.953	FALSE		607	706	862	638	659	729	823	637	709	965	638	603	569	494	550	764	837	852	818	832	787	742	778	681	818	816	680	918	866	912	614	639	700	571	511
404	Metabolite_404	2.17	129.017	FALSE		581	475	401	501	397	420	310	347	418	395	1111	1105	511	728	602	292	357	299	266	245	268	245	310	270	308	249	179	185	159	193	528	486	749	432	586
405	Metabolite_405	1.37	129.018	TRUE	68.99615:17 68.99886:35 84.04436:19 84.08483:20 87.00708:106 90.01007:20 111.00619:38 129.01701:68	2899	5479	5560	3920	3493	1195	1192	1056	1597	1207	9665	6818	5360	9552	5449	332	620	495	533	566	271	365	215	222	370	117	130	127	139	146	2104	5201	3755	4503	5372
406	Metabolite_406	1.46	129.019	TRUE	68.99486:61 84.03944:19 111.00826:29 113.96068:27 127.03842:31	5005	4974	5265	3997	4062	1492	1684	1261	3195	1276	10148	10528	9728	10064	8898	883	1277	1196	1024	1238	443	911	500	585	884	106	97	162	139	146	6524	5308	4243	4809	5375
407	Metabolite_407	1.71	129.018	FALSE		10077	11088	11519	2146	10256	3418	3867	3152	3231	3407	16881	18128	17041	18412	17895	2663	3384	2191	2176	2328	1203	1940	1640	1592	1864	374	494	528	448	512	12772	12762	10452	10559	12318
408	Metabolite_408	1.67	129.019	TRUE	68.99772:20 84.04487:128 87.00385:19 111.01475:21 127.0385:20	11251	12002	9850	10625	8713	4069	3167	2070	3872	2754	18775	19804	19200	19156	18271	2404	2822	1962	3011	2734	1192	1596	2064	1622	1764	432	528	528	491	530	14549	13715	12618	12399	14509
409	Metabolite_409	2.04	129.018	FALSE		633	648	607	604	553	484	367	358	392	399	1042	1663	951	1279	863	507	430	382	486	395	460	405	433	456	376	234	231	185	177	184	697	659	1020	721	1070
410	Metabolite_410	0.99	129.019	FALSE		473	450	631	426	501	717	478	490	642	636	331	284	287	291	358	227	302	266	273	239	277	279	238	312	317	181	205	184	164	158	293	393	363	382	292
411	Metabolite_411	0.73	129.02	FALSE		2706	2807	2777	2554	2351	2258	2136	2403	2394	2259	3987	4101	4521	3407	3860	1897	1953	1840	1869	1726	2017	2038	1824	1910	1754	1081	973	1197	841	1191	2881	2969	2503	2775	2965
412	Metabolite_412	3.9	129.054	FALSE		688	552	573	588	709	677	591	623	662	711	200	254	157	198	214	184	167	240	230	144	316	266	280	292	386	103	154	90	98	79	569	537	572	454	476
413	Metabolite_413	0.93	129.064	FALSE		1474	1554	1382	1488	1463	1089	1094	1121	1191	1214	1107	974	1010	901	980	688	666	681	631	568	533	562	505	522	591	402	323	340	415	459	2257	1939	2047	2084	2405
414	Metabolite_414	12.77	129.102	FALSE		121	231	135	100	80	199	111	311	501	101	72	727	81	147	109	331	81	202	110	166	614	136	117	499	378	80	150	85	81	74	107	65	603	487	129
415	Metabolite_415	8.42	129.128	TRUE	78.99599:30	1158	772	1118	842	734	695	1138	760	696	594	704	1806	800	384	753	1328	910	813	641	662	1574	774	1598	1373	973	521	676	1104	851	833	609	678	1095	1538	445
416	Metabolite_416	0.72	130.018	FALSE		2218	2363	2417	2134	2255	1887	1950	2005	2021	1942	2987	3302	3143	3188	2998	1650	1493	1570	1543	1472	1471	1554	1368	1782	1490	773	708	648	708	691	2422	2518	2709	2440	2723
417	Metabolite_417	1.67	130.023	FALSE		1137	972	914	1258	1115	674	671	1074	1260	1165	1351	1416	1177	1444	1312	787	559	446	512	617	643	430	747	487	597	522	316	309	517	368	1032	1050	1038	1068	929
418	Metabolite_418	1.38	130.026	FALSE		775	914	944	800	815	659	690	609	769	841	987	1110	794	1051	903	523	610	586	490	493	387	376	345	434	333	514	286	320	352	311	645	754	486	597	666
419	Metabolite_419	1.73	130.049	FALSE		1679	1618	1496	1692	1448	1686	1824	1789	1547	1780	1763	1868	1993	1717	1987	1074	900	765	892	898	996	1241	1110	1243	1016	821	599	696	572	627	739	667	754	828	857
420	Metabolite_420	3.99	130.05	FALSE		190	172	206	210	187	192	212	169	184	184	143	161	142	154	174	151	124	104	112	137	97	194	106	117	110	114	109	108	139	106	802	1280	526	508	844
421	Metabolite_421	0.87	130.052	TRUE	74.02329:65 84.04408:1614 84.95086:19 85.02527:45 85.04332:50 85.04881:53 85.05457:16 86.05636:26 87.051:49 87.05743:21 87.09354:16 95.00912:18 102.05405:107 115.08481:23 116.32465:17 130.04964:1577 130.10175:28	85383	80831	74858	79558	77351	88109	79123	84248	85595	82876	65294	68009	62387	79867	63165	81334	86677	77951	79914	80106	44398	45518	46337	50583	45675	52366	44470	3621	44845	46099	39637	35615	38199	37318	43695
422	Metabolite_422	12.78	130.049	FALSE		1018	957	769	970	771	706	767	853	838	1033	977	988	1035	904	938	812	622	653	861	810	759	692	396	762	732	587	589	858	796	712	894	713	704	737	310
423	Metabolite_423	1	130.049	FALSE		17790	22828	19724	23141	23782	22666	23922	26434	4504	26462	14200	14568	13630	12259	13544	15714	17366	16629	17388	16043	7554	8757	7135	9013	7490	12371	12331	12703	11184	11080	11310	9810	9727	9646	2085
424	Metabolite_424	1.78	130.051	TRUE	85.08679:18 130.05194:25	2069	1792	2113	2015	1777	1873	2006	1943	1976	1946	2561	2710	2467	2495	2706	945	1103	813	1158	1021	1105	1322	1172	1390	1098	914	600	674	572	627	678	693	739	852	932
425	Metabolite_425	4.34	130.065	FALSE		455	368	362	358	355	168	154	155	160	187	800	680	728	900	827	116	264	131	111	130	101	140	103	85	113	105	66	90	81	127	624	383	520	472	765
426	Metabolite_426	1.37	130.087	TRUE	84.08148:285 85.02725:20 85.08117:16 116.03567:16 130.08467:709	15504	16707	14919	14618	14394	7210	6824	7275	8199	7487	20239	21765	21159	21181	19705	6111	6057	5871	5961	5868	7069	7490	6948	8484	7650	3831	3635	3169	3433	3495	3066	2584	2591	2722	3333
427	Metabolite_427	0.79	130.092	FALSE		569	683	493	554	545	501	434	508	506	533	615	641	544	640	645	537	673	735	642	586	494	457	493	601	526	3241	3021	1084	3310	3558	704	665	708	517	571
428	Metabolite_428	0.98	130.086	FALSE		23377	24032	21452	21119	21297	13508	12059	11869	13132	12472	21924	23791	22202	24047	21609	12553	13110	11833	11765	11821	12242	12183	12576	13430	12144	10497	9367	8905	9626	9719	2138	3177	3788	2524	4537
429	Metabolite_429	1.07	130.087	FALSE		18537	19909	18150	17648	17373	9886	8527	8260	9082	9045	16575	19102	17497	17668	16525	9804	9240	8853	8823	8838	10473	10889	10928	11751	10561	2222	7916	7422	7585	8113	2032	2098	2320	2456	2335
430	Metabolite_430	11.37	130.16	FALSE		658	846	656	664	635	789	634	796	628	608	783	614	604	651	656	669	750	609	598	660	620	802	985	751	683	591	653	581	562	638	707	550	734	591	813
431	Metabolite_431	3.13	130.16	TRUE	84.03677:17 130.15596:44 130.16295:67	2934	2695	2539	2654	1558	2602	4138	2102	2836	3220	2320	4431	3495	971	2063	5232	1703	2623	2097	2931	2625	1604	2309	2724	2528	3072	2100	2731	3608	1659	1218	1893	2329	1634	2302
432	Metabolite_432	12.77	130.159	FALSE		1054	885	837	995	894	903	851	929	773	868	940	952	925	1021	1033	779	919	916	1054	832	976	885	1005	984	701	1062	984	904	790	913	937	1054	1045	805	912
433	Metabolite_433	12.62	130.161	TRUE	130.16534:16	1292	1270	1170	1163	1087	1367	1038	1204	1223	1091	1246	1314	1143	1226	1264	1131	1093	960	1239	1148	1095	1118	1212	1106	991	1393	1168	1098	1142	1285	973	1251	957	1035	1306
434	Metabolite_434	11.48	130.16	FALSE		780	901	647	854	777	870	891	1047	844	911	657	604	568	732	708	840	661	608	660	773	620	802	592	751	539	623	572	637	520	711	762	864	861	756	913
435	Metabolite_435	0.72	130.966	FALSE		954	573	637	744	1017	1098	925	775	924	949	840	799	699	1202	901	1243	844	1087	948	1001	1325	1056	1362	1355	1074	953	776	986	608	872	929	807	1545	1462	1415
436	Metabolite_436	0.62	130.97	TRUE	111.96822:28	888	1119	952	882	908	1116	900	793	1024	878	971	1013	1055	1083	1088	912	862	809	698	1042	1023	853	956	909	913	656	1101	791	1138	899	1161	907	978	931	1030
437	Metabolite_437	4.7	130.964	FALSE		461	431	417	493	534	592	457	464	432	412	400	611	471	549	529	644	477	539	485	402	607	376	466	570	479	607	664	694	605	604	316	321	536	342	500
438	Metabolite_438	13.49	130.969	TRUE	96.96103:16 113.96499:31	1406	2185	2360	1695	1873	1781	1879	1843	1782	1922	2124	2015	2499	2227	1942	2106	1870	1926	1779	2055	1811	2116	2135	2317	1852	2061	2032	2525	2232	2095	1655	1951	1929	1872	1580
439	Metabolite_439	13.33	130.97	TRUE	113.95933:76 119.84012:16	1792	1981	2083	2014	1819	1891	2245	2080	1965	1845	1999	2013	2183	2110	2646	2332	1630	2159	2069	1950	2007	1921	2105	1754	1940	2636	2140	2548	1924	2137	1714	1915	1965	1604	2034
440	Metabolite_440	2.37	130.966	FALSE		729	721	631	765	573	900	776	702	812	1115	531	651	590	815	808	948	852	859	800	805	854	912	861	911	664	981	950	807	809	752	624	637	803	678	802
441	Metabolite_441	2.26	130.966	FALSE		768	608	621	663	495	844	660	543	821	776	468	524	604	557	553	834	1009	879	889	869	931	1034	1026	862	888	1116	1079	804	1054	949	747	637	678	926	771
442	Metabolite_442	13.08	130.966	FALSE		2876	2281	2190	2277	2517	2250	2101	2139	2190	2593	2617	2666	2397	2878	2728	2420	2528	2568	2878	2239	2969	2501	2866	2382	2722	3340	2723	3268	2816	2783	2353	1732	2124	1825	1906
443	Metabolite_443	13.22	130.968	TRUE	72.93802:34 89.93511:16 91.50611:24 96.96358:40 113.96413:60 113.97289:16	2417	1824	1898	1824	2003	2011	2006	1879	1633	1809	2017	2396	2102	2423	2511	2191	1953	2242	1970	1863	1998	2034	2106	2264	2056	2599	2010	2223	2143	2541	1949	2074	2065	1665	2153
444	Metabolite_444	3.36	130.971	FALSE		435	395	455	403	421	449	404	391	467	432	550	558	509	629	448	603	565	478	560	583	648	535	647	460	456	732	825	716	733	775	421	296	347	372	370
445	Metabolite_445	4.57	130.968	FALSE		471	412	524	525	530	575	386	451	408	387	417	484	479	998	483	560	430	481	485	606	478	344	523	524	420	772	627	487	587	617	317	342	420	348	513
446	Metabolite_446	2.92	130.966	FALSE		679	642	558	731	582	870	742	649	720	757	516	607	728	1001	562	786	1037	952	788	685	595	632	951	828	618	893	811	677	950	880	762	632	628	568	618
447	Metabolite_447	2.32	131.046	FALSE		2496	2453	2263	2192	2513	2784	2262	2333	2665	2749	3140	2522	2802	2934	2551	1266	1292	1227	1273	1304	1925	1342	2189	2210	1787	1932	1588	1608	1685	1900	2106	1837	1510	1449	605
448	Metabolite_448	1.38	131.037	FALSE		613	713	657	815	513	756	694	874	889	740	453	464	412	511	498	351	284	399	357	299	311	287	244	358	292	168	144	141	147	148	444	441	475	431	475
449	Metabolite_449	0.98	131.033	FALSE		5478	5017	4610	5450	4608	5568	5057	5257	5404	4754	3696	4498	3924	4907	4674	4470	4330	4578	4564	4725	2403	2662	2684	2800	2896	2791	1215	3142	2094	2658	2543	2450	2672	2752	2813
450	Metabolite_450	3.14	131.048	FALSE		251	240	190	438	244	248	254	213	301	231	394	596	488	548	472	674	548	430	599	583	628	783	626	776	615	288	224	218	281	227	362	298	365	271	365
451	Metabolite_451	4.04	131.049	TRUE	103.05529:25 131.04092:17 131.05023:17	452	523	481	504	537	683	475	607	720	554	1507	1585	1357	1495	1313	498	670	538	571	508	286	394	277	398	346	209	155	213	178	157	563	751	587	549	837
452	Metabolite_452	2.35	131.05	TRUE	113.96054:28	2506	2659	2475	2501	2665	2772	2669	2556	2744	2807	2944	2894	2909	3015	2729	1508	1618	979	1459	1586	1827	2127	2224	2292	2066	2557	2217	1812	1995	2450	2057	2155	1899	1722	2363
453	Metabolite_453	4.2	131.05	TRUE	103.06041:24 112.95683:30 113.96175:35 113.97686:16	187	198	182	199	208	186	142	165	193	129	214	266	222	291	191	1208	1088	639	1080	636	1423	1352	1550	1688	1559	399	340	308	384	377	329	273	282	226	372
454	Metabolite_454	3.37	131.052	TRUE	103.05264:47 123.96195:22	1173	795	1119	1119	1055	641	1070	874	1279	955	1208	1313	1232	1528	1131	1675	1793	2056	1748	1730	2146	2632	2214	2303	2068	725	511	632	667	534	797	862	1054	860	1151
455	Metabolite_455	3.49	131.049	FALSE		907	846	737	778	749	828	768	747	1060	910	961	1198	1369	971	805	1927	1871	1696	1993	1515	1689	1796	1836	1877	1486	598	449	632	667	453	752	862	645	719	1076
456	Metabolite_456	4.58	131.049	FALSE		253	208	221	167	167	207	225	177	242	162	631	552	669	583	567	533	649	713	566	612	641	737	1130	670	682	242	155	275	201	255	246	328	255	223	316
457	Metabolite_457	2.93	131.05	TRUE	103.05367:125 104.51605:17 131.04266:21 131.0526:31	298	379	341	323	397	408	498	381	410	351	506	476	454	455	462	974	617	723	963	529	528	528	425	741	469	215	138	215	192	185	6136	7652	5862	4682	6773
458	Metabolite_458	4.7	131.051	TRUE	88.92616:37 89.51064:32 113.97024:25 131.05859:26	420	504	315	316	289	135	225	162	203	153	309	401	305	376	288	488	803	650	504	547	1200	803	751	1305	866	167	176	186	155	150	484	401	421	407	436
459	Metabolite_459	0.87	131.053	FALSE		5883	5861	5249	5634	5637	5737	5407	5827	6426	5641	4892	4612	4680	5613	4768	5368	5610	5595	5779	5561	3273	3593	3299	3501	3617	3860	3097	3357	3150	3144	2804	2707	2585	2754	3320
460	Metabolite_460	3.86	131.085	FALSE		488	500	547	406	539	206	216	246	247	258	70	105	91	118	90	119	253	143	110	125	115	126	115	120	93	116	88	83	82	163	158	101	92	100	155
461	Metabolite_461	1.38	131.089	FALSE		1684	1379	1813	1667	1583	713	627	760	719	625	1668	1853	1753	1830	1765	770	717	650	502	795	615	948	643	745	772	461	473	412	316	318	304	294	332	273	351
462	Metabolite_462	0.98	131.084	FALSE		1612	2015	1854	1689	1538	946	889	833	1218	930	1862	2043	1651	1831	1566	895	1014	972	1182	1030	1139	1051	1404	1235	1096	1044	803	816	1249	1405	735	1175	1200	625	668
463	Metabolite_463	3.38	131.087	FALSE		415	478	534	425	429	376	393	861	895	359	114	100	90	61	72	98	110	116	85	148	141	148	179	116	185	115	74	97	73	102	174	214	168	156	195
464	Metabolite_464	0.77	131.129	FALSE		51	132	63	119	85	85	164	145	74	112	196	237	166	132	241	74	80	55	112	73	63	57	51	58	43	163	160	186	203	203	2271	2577	2314	2223	3267
465	Metabolite_465	3.13	131.163	FALSE		459	464	299	443	208	320	621	248	464	438	435	674	441	143	255	693	236	348	277	407	465	222	360	352	422	368	262	366	439	285	182	277	351	298	301
466	Metabolite_466	12.82	131.534	TRUE	65.57554:17 90.50622:57 98.52015:20 100.95413:16 115.96481:35	1871	1927	1857	1912	1822	1653	1989	1281	1346	1794	1917	1625	1964	1655	2083	2216	1540	1974	1958	2013	2191	1937	1803	2217	1927	1804	1957	2011	1988	1805	1998	1695	2133	2037	1713
467	Metabolite_467	2.93	132.052	FALSE		564	590	300	237	297	155	403	198	322	275	208	277	416	404	298	176	287	249	336	221	160	201	123	177	318	348	315	125	253	192	677	758	1052	636	735
468	Metabolite_468	0.87	132.056	FALSE		1369	1234	993	1279	1418	1128	1229	1191	1227	1175	728	1004	802	842	833	905	897	1135	982	885	731	647	781	738	796	645	582	607	906	601	657	697	563	766	691
469	Metabolite_469	2.84	132.081	TRUE	130.07373:21 132.08339:20	990	1043	954	1044	1069	541	423	439	439	497	663	875	704	744	665	511	506	568	534	526	404	444	346	616	516	909	716	752	759	711	372	348	399	335	368
470	Metabolite_470	1.93	132.103	TRUE	86.03117:16 86.09557:493 86.14314:20 87.09353:16 87.10126:34 92.05016:20 113.96841:17 132.10062:153 132.10942:31	13030	14177	18683	18239	12192	14203	11706	12225	13506	12142	16438	18687	16337	17527	21356	16824	13445	16466	14525	16518	15022	15206	14802	17399	15704	14261	16003	12426	13188	18355	16000	8417	8627	14821	11224
471	Metabolite_471	2.54	132.103	TRUE	113.06705:20 113.96049:20 132.10313:30	515	492	517	363	488	219	228	197	281	301	1124	1121	1139	1193	970	272	232	281	207	230	90	109	134	136	139	139	141	90	113	136	339	318	249	288	389
472	Metabolite_472	2.44	132.102	FALSE		540	441	516	379	504	210	189	197	281	301	1309	843	786	803	782	272	232	205	202	230	148	131	99	138	139	139	141	137	130	136	339	318	249	288	386
473	Metabolite_473	2.05	132.102	FALSE		17868	19426	19890	1279	17185	14590	13898	15401	16127	14631	22505	26474	21458	1752	21744	15907	1560	15480	15109	14953	15512	15570	15422	18488	1588	16334	16676	13696	15125	1028	16750	15937	15563	15102	1923
474	Metabolite_474	12.8	132.53	FALSE		869	1110	905	850	839	924	835	1102	1049	922	1024	843	1196	813	958	802	798	867	960	822	932	844	829	1283	846	746	623	929	1002	1221	939	1012	869	934	928
475	Metabolite_475	0.72	132.999	TRUE	68.98228:16 87.98583:16 114.98709:146 115.98942:19 116.92773:16 128.97171:24	5494	6686	6142	5360	5067	5319	5200	5094	5773	5197	9081	10715	8598	9171	10038	5159	3584	5079	3987	4056	4342	4260	3847	4608	4119	2168	1839	1618	1726	1822	6238	6034	8845	7325	8704
476	Metabolite_476	2.36	133.031	FALSE		227	236	261	208	179	163	174	148	144	158	592	417	438	485	360	658	731	640	703	702	298	324	262	371	235	175	123	216	125	141	153	184	145	159	243
477	Metabolite_477	1.44	133.032	TRUE	85.03127:16 133.02774:44	1088	1247	1088	1122	1031	872	911	1089	1131	946	1490	1680	1510	1727	1601	1241	1400	1513	1617	1621	816	950	852	1239	967	936	818	865	775	930	912	742	719	697	1099
478	Metabolite_478	0.85	133.062	TRUE	74.02026:17 74.02451:25 75.02711:16 87.0552:82 87.08601:16 88.04221:37 97.70534:20 116.03367:20 117.03648:17 133.05232:27 133.06372:205	26031	24203	21555	23975	21304	6418	5674	6165	6130	5303	22116	23588	20780	24403	22364	16351	15683	15706	15034	15014	6880	6631	7005	7513	6507	28456	24172	25527	25226	26238	8165	7545	8879	8876	10356
479	Metabolite_479	0.97	133.059	FALSE		11589	12480	10507	12065	10861	2314	3326	2945	1371	3347	4774	15135	13925	5029	14783	6018	4915	6169	6088	5718	2473	2717	2105	3001	2596	9357	8435	9146	2480	9685	3494	3713	4094	3460	1315
480	Metabolite_480	3.07	133.065	TRUE	133.05606:20 133.06615:47	306	372	342	280	249	360	341	388	309	288	223	253	239	254	215	294	277	289	286	230	205	224	300	257	218	171	135	126	148	108	1534	1896	1493	1298	1754
481	Metabolite_481	3.21	133.065	FALSE		276	222	198	225	190	122	156	161	140	143	195	255	169	219	255	548	733	696	551	761	492	570	545	627	556	308	208	290	215	410	333	342	438	368	499
482	Metabolite_482	1.92	133.105	FALSE		1650	1388	1425	1322	1207	1314	1207	1277	1431	1105	1877	2268	1945	1528	1775	1377	1139	1502	1765	1359	1333	1209	1124	1974	1638	1502	1110	978	1126	1268	1291	1482	1004	1352	2040
483	Metabolite_483	0.73	133.999	FALSE		784	1062	933	1219	713	763	884	914	958	1064	1403	1830	1693	1470	1795	857	685	747	698	845	794	747	549	727	791	447	442	422	475	402	852	1030	1561	991	1240
484	Metabolite_484	3.8	134.044	FALSE		142	166	193	161	132	153	168	121	124	136	104	107	82	94	98	94	119	142	183	115	130	182	207	192	196	58	67	69	54	79	800	1051	601	578	871
485	Metabolite_485	0.87	134.046	TRUE	74.02523:37 88.03708:49 88.0776:26 89.04073:40 92.05083:16 133.05727:16 134.08615:19	6930	7326	6509	7219	6536	5349	5071	5342	5385	4966	3481	4019	3318	3905	3163	7136	6250	6621	6332	6468	3754	3301	3533	3884	3577	3904	3551	3778	3575	3887	10388	8519	11348	11279	11075
486	Metabolite_486	2.23	134.048	TRUE	106.0554:46 107.05907:16 134.05103:40	711	664	736	731	632	729	644	655	689	694	1055	888	986	1022	960	128	149	140	136	140	90	128	142	126	103	90	108	123	95	86	168	138	160	268	137
487	Metabolite_487	0.89	134.082	TRUE	61.04258:18 72.05294:18 88.04605:19 88.07102:17 94.06285:18	3515	4014	3392	3729	3735	2287	2171	2517	2580	2239	1468	1786	1384	1452	1782	1008	924	1044	1086	941	484	477	401	504	412	1838	1513	1646	1360	1623	3763	3117	3338	3539	3814
488	Metabolite_488	0.72	134.996	FALSE		956	1102	1142	938	970	883	901	878	1109	804	1536	1755	1355	1579	1420	912	612	830	720	799	808	655	693	762	513	456	406	538	456	469	1228	1175	1561	1289	1443
489	Metabolite_489	0.82	135.035	FALSE		314	382	301	368	400	297	309	923	413	293	327	439	254	339	403	550	542	546	533	627	381	774	293	350	322	309	360	304	278	294	717	547	796	703	774
490	Metabolite_490	2.23	135.056	TRUE	108.03624:21 108.04632:22 134.04608:27 135.04529:22 135.05608:102	1603	1602	1439	1405	1295	1090	1255	1129	1271	1049	1821	1910	1766	2180	1816	567	600	543	589	508	630	768	752	747	650	267	166	187	223	280	734	582	697	689	778
491	Metabolite_491	1.89	135.056	TRUE	80.04769:25 92.04639:75 94.03268:16 118.93891:19 119.05072:22 133.10504:16 135.03127:24 135.05515:2143	29776	33045	31969	30589	29203	29571	29292	28481	30085	29724	34689	35961	34654	35732	32264	20009	20849	10018	20288	9841	32862	33178	16028	37333	32686	1639	1172	1178	2156	1084	10298	9257	10544	10073	6370
492	Metabolite_492	1.66	135.054	FALSE		3271	3741	3671	3528	3740	1418	2907	3242	790	1553	4780	3493	4975	5026	4865	2244	2456	2304	1969	2190	3331	3987	2337	1080	3622	226	153	117	229	130	982	1328	1371	1032	789
493	Metabolite_493	1.53	135.056	FALSE		1428	1341	1314	1106	681	1270	1136	1291	1341	1380	1431	1321	1364	2028	1616	748	1082	858	1158	714	1631	1653	1480	1688	1571	226	135	133	153	93	357	529	477	375	382
494	Metabolite_494	3.15	135.056	TRUE	54.04362:33 80.05315:38 108.04007:16 109.95635:17 135.01332:30 135.05367:133 135.06055:111	10681	9935	11372	9848	9607	6156	5091	5621	5742	6072	8099	7644	7678	8244	7295	493	502	494	454	367	212	301	209	249	218	158	96	145	131	124	194	237	212	153	248
495	Metabolite_495	2.03	135.055	FALSE		2688	13868	2375	10986	11000	11757	14042	14676	14122	13241	11781	15282	2567	3513	11776	7873	6643	7556	8416	7309	15457	1193	11132	16978	12673	481	331	296	499	386	5277	3648	4439	4961	5242
496	Metabolite_496	11.08	135.059	FALSE		503	310	400	348	539	425	349	307	381	455	418	429	432	487	465	282	340	281	364	295	333	400	448	276	349	356	256	316	300	329	321	381	169	259	235
497	Metabolite_497	0.87	135.084	FALSE		600	444	326	394	349	292	266	430	278	239	274	360	327	383	282	390	237	330	310	239	259	240	328	200	301	334	295	294	310	314	368	458	405	343	385
498	Metabolite_498	2.57	135.082	FALSE		559	584	610	490	470	601	455	482	606	740	375	377	327	369	314	190	219	173	183	209	200	199	171	164	123	83	80	125	85	102	575	602	561	464	615
499	Metabolite_499	10.54	135.115	FALSE		337	314	404	369	424	323	203	286	208	278	136	109	157	169	196	173	256	226	245	206	81	164	110	133	277	104	160	122	97	190	567	630	619	645	722
500	Metabolite_500	10.27	135.116	FALSE		260	337	284	387	362	291	213	319	312	311	239	156	177	157	155	279	265	350	311	293	143	212	162	163	210	100	130	113	109	107	678	840	584	757	640
501	Metabolite_501	10.64	135.116	FALSE		282	355	388	378	424	357	316	263	280	302	237	124	157	169	277	292	242	258	245	293	91	176	107	89	160	129	154	122	142	190	699	731	631	627	678
502	Metabolite_502	5.2	135.119	TRUE	91.05895:20 93.07389:23 107.09572:18 135.12155:45	215	159	188	234	209	241	172	215	250	262	121	122	124	111	94	250	272	259	215	321	864	839	840	789	818	313	247	231	260	237	308	319	182	288	270
503	Metabolite_503	11.08	135.117	FALSE		513	650	495	394	478	394	406	409	487	360	383	212	503	438	508	297	414	396	280	368	327	255	305	230	362	357	335	207	232	322	1440	1070	1121	1311	1116
504	Metabolite_504	10.93	135.117	FALSE		450	654	425	468	504	490	445	411	471	495	365	290	503	454	453	436	580	442	454	435	327	278	305	219	380	271	319	207	241	244	671	608	602	699	689
505	Metabolite_505	4.81	135.118	TRUE	93.0709:16 135.11453:38 135.12148:25	973	993	1004	1091	871	810	701	845	854	827	292	171	197	240	189	361	390	285	281	293	757	709	683	664	723	235	175	168	237	256	652	649	674	477	572
506	Metabolite_506	4.61	135.119	FALSE		178	178	267	178	152	348	323	406	394	496	206	182	165	192	150	646	874	806	824	792	655	688	669	748	719	338	338	329	314	350	476	664	413	377	558
507	Metabolite_507	13.92	135.95	TRUE	118.93992:95	1210	1225	1446	1633	1024	1195	1281	1113	1576	1071	1464	1615	1679	1469	1426	1516	1112	1477	1663	1220	1423	1339	1710	1465	1351	1603	1523	1148	1542	1598	1219	1341	1213	1118	1315
508	Metabolite_508	13.25	135.945	FALSE		1544	1433	1413	1276	1234	1541	1337	1327	1354	1256	1353	1771	1332	1364	749	1582	1369	1407	1414	1433	1418	1330	792	1435	1312	1851	2108	1424	1638	1443	1247	1127	1300	1063	1312
509	Metabolite_509	1.55	135.946	FALSE		366	404	506	408	387	631	535	571	572	526	245	293	277	274	245	847	634	686	725	539	801	564	678	839	721	787	791	842	848	671	349	436	495	594	385
510	Metabolite_510	13.58	135.947	TRUE	74.93681:17 89.9407:83 117.93901:16 118.94238:35	1212	1245	1292	1304	1411	1228	1235	1496	1148	1108	1448	1466	1415	1540	1485	1345	1379	1436	1227	1309	1335	1329	1132	1470	1374	1311	1233	1458	1358	1285	1630	1165	1159	1238	1130
511	Metabolite_511	0.65	135.947	TRUE	89.93891:16 100.92645:18 118.94269:18 120.94065:22	1443	1210	1366	1391	1036	1374	1049	1325	1127	1068	1592	1507	1112	1219	1027	1253	979	1112	1102	987	1216	925	1044	1442	1166	1182	1104	1094	1045	1142	1041	1016	1630	1244	1672
512	Metabolite_512	0.7	135.946	FALSE		1462	1754	1418	1427	1347	1073	1316	1377	1522	1323	1590	1507	1363	1442	1509	1664	1168	1495	1282	1236	1567	1183	1331	1386	1274	1465	1336	635	1184	1426	1437	1416	1630	1442	1690
513	Metabolite_513	1.7	135.948	FALSE		375	414	398	517	415	620	657	692	681	602	295	282	269	290	305	800	650	664	829	714	1196	763	1057	980	959	1105	941	1046	1139	1010	400	478	486	478	595
514	Metabolite_514	1.33	135.95	FALSE		469	507	437	564	523	565	520	579	574	460	382	420	344	363	303	649	518	685	755	663	740	705	609	878	655	777	665	906	789	751	541	537	628	711	571
515	Metabolite_515	13.48	135.95	TRUE	73.94193:17 89.94417:29 100.93704:62 116.93147:23 118.94762:32	1677	1742	1917	1356	1615	1708	1575	1581	1799	1571	1793	1718	1324	1707	1839	1689	1602	2079	1494	1360	1714	1612	1564	1563	1625	1668	1920	1348	1484	1733	1455	1371	1696	1615	1730
516	Metabolite_516	13.68	135.948	TRUE	72.94227:17 74.95518:52 96.96976:17 100.93488:17 108.0949:17 117.93954:104	1415	1548	1197	1182	1255	1359	1142	1181	1485	1289	1448	1254	1268	1444	1383	1107	1593	1196	1254	1304	1276	1119	1248	1353	1417	1322	1055	1284	1186	1163	1215	1181	1431	1020	1094
517	Metabolite_517	14.3	135.951	TRUE	100.93696:18 100.94686:25 116.91335:32 117.94499:76	1634	1274	1386	1649	1297	1208	1161	1246	1677	1142	1404	1548	1507	1547	1315	1454	1532	1466	1168	1179	1573	1109	1214	1271	1166	1345	1223	1482	1187	1368	1582	1050	1264	1154	1312
518	Metabolite_518	3.17	136.056	FALSE		718	1005	950	966	936	616	583	793	716	777	822	828	942	945	1085	97	93	145	113	122	84	71	67	172	70	88	86	134	73	82	123	84	119	81	90
519	Metabolite_519	2.7	136.063	TRUE	119.02877:18 136.05319:16 136.06419:70	1129	964	985	1102	941	872	775	710	694	857	531	493	534	571	502	438	576	330	329	405	279	287	235	280	295	285	206	226	177	177	664	676	507	515	632
520	Metabolite_520	1.89	136.06	FALSE		6854	6279	7091	6458	6611	4573	3937	4083	4561	4396	11876	12311	11207	12387	11717	9154	9597	8501	9113	3453	3400	10588	9941	10719	9958	13428	11782	11513	11590	12930	4425	3629	3096	3424	4361
521	Metabolite_521	0.98	136.062	FALSE		566	567	626	507	648	420	442	333	367	350	515	526	478	500	513	640	642	382	417	539	388	316	311	344	319	132	131	174	119	146	784	551	615	534	568
522	Metabolite_522	1.65	136.079	TRUE	89.94348:54 119.05943:24 136.07793:35	701	767	834	887	671	582	581	552	594	705	845	736	895	670	753	782	741	1168	809	1022	745	1068	970	875	948	1064	856	875	1060	873	526	505	466	444	366
523	Metabolite_523	1.56	136.076	TRUE	91.05756:20 91.06541:24 96.39089:18 111.00564:21 119.05264:16 136.08203:67	539	578	681	622	538	590	418	455	446	461	352	576	544	458	404	965	863	908	829	976	849	1040	720	1108	831	665	966	1092	784	1151	424	307	306	444	444
524	Metabolite_524	1.48	136.075	TRUE	91.05223:17 91.06024:45 136.07259:64	520	410	408	442	482	504	344	357	317	454	332	235	234	435	274	833	1028	1011	925	803	1096	1060	942	1423	939	1939	1393	1757	1738	1699	270	270	327	269	337
525	Metabolite_525	1.83	136.076	TRUE	91.05299:23 92.03615:16 118.94228:16 135.05251:92 135.06245:48 136.07179:35 136.08008:129	5533	5898	5744	5569	5510	3910	4020	3817	4117	4027	5137	5224	4669	5232	4836	8846	8736	9005	9594	8799	9619	10206	9912	11130	9915	13175	11497	11314	11680	12714	3237	3023	2849	2509	3421
526	Metabolite_526	2.48	137.028	TRUE	93.03352:33 137.02066:29	522	395	364	338	440	484	323	361	358	402	582	346	366	610	445	401	615	372	543	379	349	345	410	405	414	194	179	151	176	130	955	1034	768	760	1426
527	Metabolite_527	4.55	137.026	TRUE	137.01926:16 137.02641:47 137.03836:21	376	235	400	388	513	314	135	191	210	379	97	83	147	87	51	115	150	216	138	86	135	106	153	106	134	68	77	81	94	97	81	79	82	91	65
528	Metabolite_528	1.96	137.053	TRUE	95.06247:24 135.04962:66 135.05945:20 136.06686:26 137.04788:32	1064	1148	1213	934	976	786	640	817	840	820	958	1145	928	1043	1106	717	680	648	705	763	661	811	732	677	695	862	564	642	625	652	610	572	672	529	804
529	Metabolite_529	3.94	137.059	FALSE		402	358	351	327	395	392	292	380	379	290	443	382	500	432	356	714	720	697	584	704	633	710	674	759	691	301	193	240	219	240	1267	1192	1095	1154	1635
530	Metabolite_530	2.81	137.06	TRUE	137.05656:81	648	702	616	705	633	702	608	592	618	694	454	566	407	551	376	808	787	813	747	795	1244	1328	1448	1472	1368	475	373	370	445	511	589	586	457	557	618
531	Metabolite_531	3.1	137.061	TRUE	65.04567:27 77.04565:35 137.05971:42 137.06961:35	369	467	361	289	326	248	249	219	209	319	230	252	305	315	239	917	939	863	840	868	1549	1761	1598	1832	1365	884	766	786	716	846	301	342	447	338	334
532	Metabolite_532	2.58	137.061	TRUE	79.05244:26 94.04377:97 94.58102:16 109.04624:16 109.06251:73 109.06989:46 137.06033:288	9929	10396	10161	9980	9680	8902	7934	8398	9144	8436	3902	4222	3843	4430	3860	1745	1968	1771	1727	1724	1204	1318	1248	1379	1180	760	606	664	583	576	12221	10942	9727	9970	14256
533	Metabolite_533	4.55	137.061	TRUE	137.05652:22 137.06607:56	445	259	258	301	314	422	390	332	378	330	339	420	455	388	330	919	796	758	750	854	970	1178	1129	1170	1069	350	226	336	298	296	495	528	355	433	589
534	Metabolite_534	1.83	137.079	FALSE		690	676	733	623	778	497	479	418	516	635	1052	1183	1047	1117	1107	1141	1162	663	1180	1208	1058	1225	1006	1087	961	1597	1303	1214	1240	1181	585	441	423	415	676
535	Metabolite_535	11.79	137.094	FALSE		286	120	158	140	233	223	116	118	149	245	138	183	200	98	203	137	111	139	260	134	143	116	139	162	132	106	130	100	130	101	539	409	742	668	430
536	Metabolite_536	10.37	137.132	FALSE		152	214	291	362	142	206	279	357	155	147	291	114	222	159	179	142	149	431	322	398	141	299	154	197	350	275	355	199	176	219	605	728	576	732	650
537	Metabolite_537	10.84	137.131	FALSE		317	472	318	500	340	313	404	396	275	307	438	268	315	392	304	240	601	395	439	494	282	338	339	259	373	444	431	389	395	371	595	703	672	687	629
538	Metabolite_538	11.18	137.132	FALSE		782	638	536	670	839	516	520	576	378	429	451	275	374	454	354	272	511	543	412	392	268	392	309	436	366	457	494	316	258	452	3509	3892	3414	3190	3436
539	Metabolite_539	11.04	137.133	TRUE	58.01154:16 81.06913:304 95.08438:17 95.08782:32 137.12631:67 137.13458:105	3288	2647	2134	3018	3682	1077	970	760	1085	920	570	496	632	729	623	486	779	634	414	544	364	491	614	507	585	483	564	452	429	396	12667	12131	10531	11973	12080
540	Metabolite_540	12.79	137.965	FALSE		1668	1496	1417	1303	1580	1554	1272	1227	1300	1258	1639	1607	1604	1746	1730	2700	1757	1660	1615	1679	2375	1422	3170	2323	1506	1673	1700	1739	1676	1678	1545	1530	2942	1460	1654
541	Metabolite_541	0.94	138.026	FALSE		1009	1192	1059	1095	1068	742	900	783	962	830	530	688	638	562	532	591	285	476	428	342	490	268	314	416	353	335	374	384	427	312	908	914	759	850	720
542	Metabolite_542	12.78	138.056	TRUE	93.05841:16 98.96431:27	5108	4355	4076	4335	4620	4592	4016	3629	3493	4183	4012	3321	4139	4666	4145	1151	3827	3046	3426	3538	898	3008	1454	961	2772	3311	3441	3476	3287	3394	3753	4290	1467	2986	3109
543	Metabolite_543	1.67	138.054	FALSE		1198	1567	1516	1386	1532	1367	1248	1313	1426	1048	895	868	924	925	1012	381	283	327	335	399	268	279	252	304	260	227	249	246	235	219	1327	869	1234	923	1327
544	Metabolite_544	1.07	138.055	FALSE		34489	18255	44898	45087	43774	20916	13522	31943	16446	19218	11825	15736	14748	24485	14220	9892	5032	9304	5165	4634	8190	7709	7777	8109	8007	4202	5036	5010	11879	12640	39616	14141	37262	37875	38533
545	Metabolite_545	1.29	138.055	TRUE	61.02948:16 68.99844:17 93.0387:20 96.79591:21 111.01654:16 138.03447:19 138.06265:234 138.10155:30	9977	9653	5004	8652	4900	7756	6492	7387	7092	7020	5956	5978	4884	5765	6320	1875	2234	1956	1947	1933	1654	1354	1543	1685	1273	1585	1476	1061	1296	1169	6847	5940	7036	7051	8062
546	Metabolite_546	0.93	138.056	TRUE	61.0321:19 66.03626:30 67.05681:44 77.03455:17 78.03462:136 79.03909:16 79.04597:34 80.05034:16 82.05083:17 92.03365:20 92.0484:846 92.06046:18 92.34204:20 92.85787:16 93.05331:107 94.05473:28 94.06528:929 95.07045:62 108.53837:16 110.05959:42 120.04418:54 121.0452:20 122.83816:16 124.08348:21 135.44249:23 136.03902:109 137.03845:20 137.50845:16 137.92404:19 137.94571:16 138.00749:21 138.03036:50…	431575	457663	447840	468134	440309	331197	306173	322830	332612	324647	116838	129773	122062	131016	120042	61430	65534	60572	61245	59694	44437	44771	45469	49798	45290	65420	62268	59582	61269	62899	318700	278778	277200	278445	370412
547	Metabolite_547	1.17	138.055	FALSE		13126	11501	11171	14798	16177	15187	8668	15053	9894	9612	4972	6324	9698	12261	11107	5063	4778	5088	4763	5192	3578	3516	3852	4964	2354	5004	3121	4217	4705	3267	9278	6175	17461	13699	15696
548	Metabolite_548	2.57	138.063	FALSE		1026	1133	1104	1017	1146	1090	937	970	1141	960	602	974	450	647	477	327	324	313	210	314	243	295	313	328	233	283	154	166	173	174	1486	1356	1263	1096	1420
549	Metabolite_549	2.59	138.062	FALSE		1014	1133	1094	1017	1100	1090	937	970	1132	960	589	974	450	647	477	327	324	313	210	314	243	295	313	328	233	283	154	166	173	174	1005	1025	1008	1096	1094
550	Metabolite_550	10.97	138.104	FALSE		448	88	245	110	375	284	120	100	276	245	112	95	86	133	113	82	118	120	138	79	63	78	78	97	143	71	90	58	74	92	561	548	600	635	813
551	Metabolite_551	11.05	138.138	FALSE		445	361	327	382	495	198	167	159	139	192	204	137	107	127	131	111	178	165	182	190	113	138	156	100	129	126	134	125	127	99	1724	1581	1309	1486	1932
552	Metabolite_552	0.93	138.268	FALSE		10544	11916	10832	11947	9921	4706	3141	3936	4450	4030	63	120	118	158	57	45	65	47	33	53	34	69	24	67	43	45	36	58	60	39	3957	2326	2312	2505	7435
553	Metabolite_553	12.8	138.979	FALSE		1172	1174	1351	1428	1593	1306	1512	1240	1303	1492	1419	1552	1796	1840	1962	1710	1152	1712	1527	1485	1469	1420	1420	1429	1472	1598	1354	1628	1654	1460	1563	1443	1587	1522	1532
554	Metabolite_554	2.57	139.006	TRUE	68.99805:21 94.04373:16 111.00932:20 137.05841:21 137.07033:27 138.04886:37 138.05995:27	1221	731	1213	703	729	865	612	574	751	887	2270	2163	1974	2282	1977	807	829	695	782	745	751	762	835	834	776	273	263	263	276	271	1096	664	635	782	837
555	Metabolite_555	1.45	139.018	TRUE	66.03378:23 68.99837:30 94.02492:16 105.01768:22 106.033:16 122.02519:17 138.05647:80 138.06079:33 139.00609:25 139.05013:211 139.0636:43	3413	3332	10580	3115	2740	1991	1989	3333	1811	3599	3005	3364	3480	3363	6581	837	1090	852	923	963	423	680	381	594	671	188	157	131	177	122	5602	4985	2668	4340	5030
556	Metabolite_556	1.29	139.028	FALSE		10274	11114	5207	10910	9768	12642	3900	12173	12911	12274	4442	4480	22101	3207	20170	2105	1986	1911	1710	1683	1540	1168	1076	1252	999	342	171	204	220	340	12370	14927	13380	13010	15474
557	Metabolite_557	1.66	139.004	TRUE	55.05545:31 69.00117:20 94.06065:16 105.01776:19 105.02217:20 111.00748:50 112.00481:18 112.01088:58 138.05647:73	9286	9730	9401	6508	8577	3125	2122	2022	3478	2796	14558	11883	11742	12956	14583	1476	1728	1682	1796	2195	901	1578	1542	1663	1327	340	443	422	376	474	11658	11061	7453	9184	11229
558	Metabolite_558	1.85	139.002	FALSE		1807	1879	1464	3106	1309	950	1281	1455	1639	1347	6277	8265	6130	6170	1840	1326	1183	1433	1441	1232	1002	1063	1029	1101	975	352	419	415	315	309	2160	3309	4971	4220	2672
559	Metabolite_559	1.75	139.003	FALSE		2677	9051	8526	7889	8249	2731	2489	2486	3000	2989	14743	14158	14019	14039	13751	1971	2113	2078	2127	2088	1279	1847	1524	1709	1550	352	425	404	385	440	10091	10151	8003	8644	10132
560	Metabolite_560	2.48	139.04	TRUE	139.06281:35	990	1314	816	1018	1001	434	457	389	569	408	696	684	731	742	682	3921	4753	4140	5617	4219	11155	12806	10546	13075	11785	1072	895	718	818	857	1370	1427	1388	1382	1889
561	Metabolite_561	5.24	139.037	FALSE		198	183	165	146	145	312	125	134	217	182	479	650	521	608	424	603	616	605	555	548	255	171	226	236	240	137	123	113	76	97	152	138	121	120	187
562	Metabolite_562	3.48	139.04	TRUE	139.03453:16	222	231	172	199	208	125	212	168	188	140	226	151	171	202	154	532	621	503	681	691	2019	2474	1887	2555	2280	125	117	166	187	129	208	304	218	176	211
563	Metabolite_563	3.12	139.04	TRUE	138.0582:19 139.03168:15 139.04036:91	7486	6950	6834	7959	7336	2648	2114	2062	2466	2474	2730	2523	2603	2897	2325	3023	3382	2815	4008	3320	6123	7431	5947	7369	6294	2579	1840	2222	2596	1972	4926	5416	5161	4610	6366
564	Metabolite_564	1.21	139.041	TRUE	67.05125:36 83.04828:45 83.05302:55 93.03728:24 94.06765:49 108.06128:16 111.03838:17 111.04451:64 121.02934:29 138.05592:507 139.03693:180 139.04639:26	11611	11826	11265	11482	9953	13786	12777	12630	14545	12883	21750	21948	20932	23709	22341	2154	1932	1969	1611	1803	1519	1146	859	1286	1081	621	459	459	513	524	12366	14047	14134	13225	15803
565	Metabolite_565	2.97	139.039	TRUE	97.97386:16 111.98052:22 121.03283:147 139.037:36 139.04369:16	583	666	557	504	533	512	428	389	287	339	428	515	484	494	363	1256	1462	1537	1273	1306	1503	1727	1321	1596	1529	2819	1863	2367	3023	1966	735	802	729	608	735
566	Metabolite_566	4.11	139.04	FALSE		136	150	171	131	152	160	92	110	140	121	119	160	154	119	140	190	241	142	349	234	544	722	641	671	444	131	157	116	118	142	154	149	167	106	164
567	Metabolite_567	10.64	139.041	FALSE		110	126	119	122	161	160	95	119	135	172	148	108	99	112	160	78	131	79	74	151	64	67	70	80	75	82	102	76	61	98	586	661	416	442	306
568	Metabolite_568	0.99	139.047	FALSE		10862	10541	10776	11150	10231	26898	22957	25998	25994	25075	19610	19649	19743	20247	20617	5391	5917	5419	5744	5428	4094	4296	4460	4789	3996	6010	5522	5241	5542	5297	9029	22939	24166	9723	12410
569	Metabolite_569	1.45	139.051	TRUE	96.04475:40 97.03075:22 97.95818:16 106.02728:18 111.0104:17 124.03384:16 138.05246:23 138.05927:25 139.04739:342	10463	10513	10410	9145	8420	4595	4482	3721	3831	3496	19380	20851	19796	21359	18773	631	543	526	518	480	542	553	621	587	587	275	191	241	302	306	1504	1428	1398	1450	2681
570	Metabolite_570	12.8	139.989	TRUE	61.004:29 97.96461:37 98.96006:140 99.94566:26 99.97372:17 100.95529:52 139.97861:18 139.99136:34	6650	11825	7692	12721	7848	6154	7238	12078	7273	12358	8724	12664	12757	12595	8622	8626	6378	12767	8943	13039	8883	12272	6947	12814	12916	7127	8667	9398	9226	9301	7276	6528	12848	8039	6521
571	Metabolite_571	10.47	139.993	FALSE		687	706	606	654	859	651	704	750	700	536	639	666	567	609	674	675	657	778	607	879	662	802	680	625	838	672	583	554	947	576	574	808	624	573	652
572	Metabolite_572	12.99	139.989	FALSE		2708	2923	2483	2501	2387	2230	2773	2652	2464	2495	2324	2305	2507	2550	2377	2320	2229	2540	2512	2433	2904	2224	2380	2627	2607	2741	2328	2496	2063	2718	2857	2998	2853	3308	2201
573	Metabolite_573	1.45	140.007	FALSE		1073	1151	948	557	758	719	989	936	994	1096	1509	1411	2226	1561	1706	347	378	343	305	361	266	265	317	306	222	227	157	175	153	145	897	987	679	724	765
574	Metabolite_574	1.65	140.026	FALSE		1983	2398	2548	2649	2716	2704	2273	2279	2808	2751	7574	9090	5160	5261	7024	607	757	696	575	664	417	542	469	444	477	269	168	250	207	228	1032	1618	1428	1303	1676
575	Metabolite_575	1.69	140.036	TRUE	55.01558:32 94.06348:24 96.97018:19 97.96824:20 123.02614:19 140.0025:33 140.02579:20 140.03574:125 140.04114:44	3250	3139	2143	2799	2912	2889	2727	2666	3505	3260	8136	8561	8627	7411	8318	649	693	645	754	653	464	542	411	479	406	216	168	218	179	187	1154	2011	940	1707	2392
576	Metabolite_576	1.29	140.038	FALSE		1153	1002	858	1305	959	1047	1191	1433	954	952	1819	2328	2037	2552	2358	295	318	213	266	245	180	250	179	218	183	112	76	60	84	68	1250	1456	1132	1236	1423
577	Metabolite_577	1.42	140.036	FALSE		1547	1238	994	1293	899	1417	1269	1227	1143	1456	3791	3343	3637	3590	2167	316	310	411	351	302	285	285	333	283	298	132	150	103	108	81	457	653	458	509	690
578	Metabolite_578	2.49	140.042	FALSE		400	270	254	312	363	255	175	269	265	229	229	220	168	173	269	694	760	739	997	851	1644	1681	1398	1623	1393	291	193	195	233	173	385	321	259	292	369
579	Metabolite_579	1.22	140.039	FALSE		1043	981	872	1237	959	1177	1191	1433	1101	952	2417	2969	2602	3394	2511	308	318	213	266	269	180	250	166	218	183	112	76	99	84	111	1193	1367	1130	1254	1321
580	Metabolite_580	0.96	140.053	FALSE		2985	3234	3505	3469	2803	2341	2338	2167	2495	2215	1005	896	1551	1856	1841	637	661	557	657	579	467	438	665	597	462	877	602	657	463	593	2250	2123	2157	2210	3130
581	Metabolite_581	12.98	140.956	FALSE		709	909	844	766	1012	866	773	818	902	922	860	949	696	892	808	978	887	896	864	731	975	750	1015	962	887	907	914	1089	931	1014	761	772	859	786	884
582	Metabolite_582	0.72	140.961	FALSE		269	240	257	308	240	272	323	314	304	338	245	215	251	237	320	518	605	595	715	659	647	758	636	770	652	139	184	205	153	126	371	336	341	334	456
583	Metabolite_583	12.78	140.995	TRUE	98.09676:37 98.96005:16 100.10724:16 100.11632:81 101.07397:17 139.97713:17 140.05452:21	7688	8405	8831	8544	8869	7130	8585	8344	8233	8537	9358	10287	9124	8578	9337	10186	7241	9694	9520	9091	10366	8053	8073	9029	9158	8559	9762	9893	9929	10492	8032	7196	10589	9466	8092
584	Metabolite_584	12.95	140.997	FALSE		2291	2325	2950	3465	2508	2291	2662	2264	2716	2378	2397	2804	2498	2406	2489	3191	2392	2203	2306	2346	2771	2378	2630	2867	2196	2307	2651	2382	2119	2782	2755	2633	2758	2895	1572
585	Metabolite_585	0.97	141.019	FALSE		249	283	284	254	310	255	305	246	294	262	389	376	348	272	398	355	404	386	334	400	299	311	343	375	361	915	882	621	782	901	470	656	529	452	536
586	Metabolite_586	1.68	141.039	FALSE		446	581	644	520	501	565	503	460	576	473	752	774	847	645	796	225	252	268	222	247	208	215	220	239	235	200	166	233	164	151	249	273	322	375	322
587	Metabolite_587	3.38	141.056	TRUE	81.03163:33 141.04538:18 141.05072:24 141.0585:31	1338	1298	1156	1208	1254	943	903	1000	849	1019	280	307	304	253	225	165	200	204	164	136	131	155	170	171	142	85	98	91	61	75	9064	5903	7363	7845	8548
588	Metabolite_588	2.7	141.056	TRUE	126.03085:18 139.10715:21 141.05663:130	717	745	762	791	769	647	551	526	646	601	304	387	372	307	360	341	340	547	412	301	277	235	243	243	225	106	76	94	57	106	4677	3135	3568	4029	4455
589	Metabolite_589	0.93	141.056	FALSE		428	485	467	417	486	466	409	385	680	504	415	568	485	369	363	304	411	334	353	392	305	231	338	251	316	397	416	355	448	431	571	571	769	579	632
590	Metabolite_590	11.1	141.958	TRUE	100.29579:18 103.95287:62 103.95763:75	126	84	103	104	88	118	100	114	109	91	123	107	151	108	105	150	64	95	101	133	165	125	124	82	129	90	103	105	102	119	90	97	126	112	103
591	Metabolite_591	3.38	141.958	FALSE		717	904	932	757	638	983	1196	833	950	942	660	772	665	706	694	747	694	1064	831	973	944	789	1033	793	763	692	698	740	815	696	653	676	778	1393	687
592	Metabolite_592	1.3	141.961	TRUE	97.9665:27 99.04736:36 141.12582:44	758	813	1253	945	983	938	990	984	789	884	804	670	767	727	665	1165	1184	1410	1358	1071	1149	950	1512	1046	1191	1069	1259	1134	1181	1279	1270	926	1426	1153	1108
593	Metabolite_593	12.25	141.958	TRUE	101.06954:16 102.11938:20 103.95355:129 103.96415:33	41	43	36	44	41	85	44	46	47	45	41	49	39	31	83	38	53	48	151	55	69	35	62	86	82	69	65	50	52	61	46	64	62	64	382
594	Metabolite_594	1.92	141.958	TRUE	96.97379:22 97.97194:28 98.96481:16 125.02364:23	920	863	937	918	867	1139	1025	1171	1098	1121	850	796	688	759	840	1279	1064	1216	1361	1163	1349	1272	1189	1583	1180	1199	1356	947	1191	1349	849	902	907	937	944
595	Metabolite_595	12.88	141.959	TRUE	97.97074:20 100.11388:49 100.93374:16 102.09025:20 103.9562:182	9850	5957	9081	5056	10230	5549	5078	10010	11284	9449	9729	7809	9332	8993	9757	6695	10364	9094	10272	9512	7602	10260	10016	7947	5643	5386	9414	9976	10889	10347	6148	5581	9161	8027	9263
596	Metabolite_596	11.23	141.962	TRUE	100.29579:18 103.95287:62 103.95763:75	126	77	103	97	132	111	103	88	80	95	112	105	151	83	111	102	82	107	120	111	165	100	104	130	129	90	126	105	141	114	97	106	109	113	103
597	Metabolite_597	1.17	141.958	FALSE		661	769	830	940	853	658	812	746	837	740	676	771	698	680	668	1307	1004	1449	1217	1166	1284	1100	1310	1165	1327	1536	1593	1334	1450	1418	984	865	1004	1082	814
598	Metabolite_598	2.04	141.958	FALSE		911	896	842	876	949	1012	896	1225	955	877	1316	961	1034	1307	1064	919	990	1070	1126	1055	1363	1138	1205	1314	1195	1016	1108	884	958	1105	901	799	1176	895	1029
599	Metabolite_599	2.77	141.958	FALSE		820	726	769	703	586	795	625	942	703	797	607	580	546	824	604	901	803	829	1040	676	1129	772	1057	996	979	641	851	798	819	931	713	561	653	615	684
600	Metabolite_600	2.83	141.958	FALSE		820	732	769	703	665	765	671	942	703	869	768	755	594	633	699	970	790	955	1254	968	1209	909	1049	1096	1299	625	851	798	819	931	713	639	720	615	664
601	Metabolite_601	0.76	141.959	FALSE		3285	746	3070	3559	3145	3269	3226	890	3589	3341	3185	3698	3135	3402	3231	1257	3164	3254	3312	1384	815	1059	824	3737	768	3195	2002	1471	1933	2066	3376	3006	3751	905	3342
602	Metabolite_602	2.07	141.959	FALSE		823	838	826	876	906	1012	808	970	866	775	1133	961	1068	1307	1064	919	990	1070	1072	1027	1462	1138	1205	1324	1195	1016	1005	904	1003	962	901	761	1176	807	988
603	Metabolite_603	13.03	141.959	TRUE	89.49255:24 89.50312:168 89.52828:16 97.96529:95 97.97469:16 98.95586:18 100.92732:17 102.01013:37 125.96291:17 141.95479:43	11698	14285	13093	12485	13289	11155	12679	13230	13338	12936	12654	14956	12677	11882	13074	14279	11128	13394	13293	12718	14494	12498	12140	15891	13518	11787	13368	13162	13422	13379	12486	11349	14295	13648	11988
604	Metabolite_604	13.46	141.963	TRUE	96.95832:20 97.9673:75 99.96787:18 107.95023:21 115.93423:16	3284	4457	3491	3730	3608	2829	3923	3732	4472	3509	3961	4545	5044	4197	3919	3992	4152	4170	4094	3255	4105	3818	3971	5155	3765	3557	3642	2919	3692	3783	3302	3735	3775	4960	4245
605	Metabolite_605	0.64	141.96	TRUE	97.96139:59 97.97028:16 113.96387:16 141.95235:27	3026	4083	3873	3594	3135	3166	3344	3487	3362	3404	3389	3269	3604	3289	3340	3163	3251	3218	3011	3110	3609	3134	3223	3675	3451	3113	3153	2911	3262	3281	3179	3831	3407	3193	3770
606	Metabolite_606	2.95	141.958	FALSE		573	776	670	683	665	745	793	861	676	869	768	910	690	611	706	871	837	878	869	951	1089	1005	1092	1015	823	755	636	659	901	789	714	705	722	580	752
607	Metabolite_607	0.53	141.959	TRUE	84.95684:18 97.96938:22 98.96409:17 141.9572:17	1598	1644	1575	1487	1642	1443	1645	1439	1924	1583	1208	1775	1382	1753	1803	1539	1267	2194	1636	1886	1590	1589	1649	1303	1338	1407	1795	1348	2125	1436	1697	1572	1928	1598	1537
608	Metabolite_608	3.97	141.959	FALSE		697	536	686	537	447	666	571	517	630	568	506	592	474	432	510	651	494	518	616	676	619	502	465	544	736	788	639	705	599	717	512	646	1099	891	873
609	Metabolite_609	13.6	141.96	TRUE	97.96695:117 114.46111:20 141.98447:18	3133	4330	3799	4122	4353	3513	5884	3887	4968	4185	4579	4342	4480	3699	4250	5254	3030	5586	4578	3892	4147	4270	3530	4587	4410	3584	3863	4465	3301	4646	3678	4691	5111	4635	3608
610	Metabolite_610	13.15	141.962	TRUE	89.50753:51 97.96887:92 99.50822:16 100.95847:36	3642	3673	3332	3345	4332	3711	3526	3560	4224	2819	3893	3837	4076	3329	4225	4101	4113	3628	4095	3645	3835	3124	3595	3059	4319	3567	3692	3658	4134	4495	2500	3287	3417	2532	3559
611	Metabolite_611	1.49	141.965	TRUE	97.97189:45 98.10561:24 140.02695:59 142.1032:23	746	792	874	798	828	893	1190	1305	1035	1011	459	697	588	540	506	1342	1403	1098	1343	1158	1278	1447	1230	1604	1668	1224	1596	1629	1194	1377	844	808	817	822	778
612	Metabolite_612	1.72	141.963	TRUE	83.04894:34 97.97288:43	798	732	1037	792	741	891	885	1174	1298	1153	645	767	705	681	768	1167	1302	1362	1185	1128	1523	1508	1462	1327	1476	1422	1697	1160	1503	1632	1119	1099	1021	921	1064
613	Metabolite_613	11.77	141.965	TRUE	72.08677:17 97.97789:32 100.11885:18 100.93696:25 103.95464:83 103.96193:20 128.49576:20	69	92	98	58	83	58	39	79	130	55	56	104	76	43	84	78	53	84	77	72	111	45	54	67	89	49	42	64	68	85	81	46	66	63	83
614	Metabolite_614	13.74	141.962	TRUE	89.94417:17 97.97379:107 100.95539:17	2949	4236	3654	3052	3268	3706	3695	3028	3210	2861	3097	3371	3058	2953	3460	3819	3173	3464	3504	3567	4008	3861	3427	3762	3963	3301	4040	2765	3822	3934	3571	3892	3412	3441	3596
615	Metabolite_615	11.43	141.966	TRUE	59.064:24 100.11321:54 100.12039:16 103.95837:98 103.96497:53	82	78	95	82	75	101	71	99	88	105	91	86	90	81	84	75	101	63	73	96	93	78	83	105	88	64	106	96	97	127	88	67	111	112	73
616	Metabolite_616	13.38	141.963	TRUE	97.96519:38 97.97056:149 125.96957:24	3200	3673	3101	3067	3410	2860	3608	3697	3583	3171	3264	3629	3917	2815	4107	3305	2816	3931	3306	4066	4152	3500	3742	3860	3062	3409	3838	3089	3500	4189	2892	2596	3952	3814	2721
617	Metabolite_617	11.67	141.967	TRUE	102.13572:33 103.95575:23 103.96242:58 128.06924:24	69	49	91	92	83	58	71	79	89	55	59	75	76	62	75	78	75	63	67	55	111	64	54	67	89	53	58	69	91	73	70	73	67	63	67
618	Metabolite_618	12.81	141.984	TRUE	100.1171:107 100.49342:16 103.95809:56 103.96439:37	6142	6653	6619	6590	6782	5822	6910	6379	6436	6614	6912	7441	6467	6596	6960	7239	6592	7333	6909	6873	6952	6693	6810	7468	7122	6862	7102	7215	7001	7216	6658	6379	7838	7267	7676
619	Metabolite_619	12.77	141.983	FALSE		3288	3691	3541	3588	3851	3357	3731	3534	3564	3672	4275	4401	4159	3618	4229	4706	3312	4460	4579	3993	4638	3478	3483	4177	3696	3548	4178	4356	4551	4558	3762	3322	5003	3976	4835
620	Metabolite_620	0.85	142.025	FALSE		472	499	564	632	585	423	453	485	459	564	273	265	262	300	277	178	228	162	153	229	238	303	296	282	255	356	312	239	204	306	383	549	378	463	257
621	Metabolite_621	1.9	142.051	TRUE	72.0848:23 96.04077:23 97.96714:30 127.03842:16	1271	1092	1237	1734	1847	680	804	817	993	888	1168	1099	1538	1138	1552	1507	2401	1568	1447	2457	3675	3790	3790	4119	3537	519	599	711	509	591	801	740	848	679	811
622	Metabolite_622	3.38	142.058	FALSE		206	167	202	154	121	203	230	163	110	151	92	84	79	68	81	110	62	71	86	53	115	55	49	71	88	74	40	71	42	58	1281	572	586	875	669
623	Metabolite_623	12.99	142.961	FALSE		1200	1143	925	1013	1126	788	1102	1010	1133	1293	972	1161	939	1130	1068	1018	868	1237	1296	988	1230	1422	948	1021	1087	1300	1072	993	1182	1180	1198	986	1054	936	914
624	Metabolite_624	12.81	142.992	FALSE		4197	4690	3596	4782	4501	4266	4311	3576	4331	4761	5644	4964	4615	4631	4048	5287	3853	5004	4926	4623	5365	4039	4240	4878	5102	4511	5538	5217	5300	5162	4269	3930	6311	5069	4691
625	Metabolite_625	2.26	143.032	FALSE		271	246	267	211	272	213	188	162	214	275	276	177	231	297	215	249	248	176	226	203	182	287	172	228	341	171	135	113	105	123	524	534	308	401	411
626	Metabolite_626	1.06	143.036	FALSE		585	697	773	781	705	644	467	603	546	711	537	411	513	437	428	194	217	317	278	255	186	264	240	213	230	231	171	176	252	159	430	500	448	506	449
627	Metabolite_627	1.2	143.036	FALSE		571	656	567	628	577	528	548	625	511	539	455	416	402	410	367	169	233	182	211	232	174	260	224	192	160	124	136	91	135	155	393	381	393	306	352
628	Metabolite_628	2.27	143.069	FALSE		129	140	115	125	130	124	71	89	142	106	84	134	87	93	126	91	72	71	76	109	111	270	93	149	78	101	117	84	97	91	780	520	886	497	804
629	Metabolite_629	2.25	143.071	FALSE		140	140	115	125	130	124	125	89	168	106	84	109	87	93	126	91	77	161	76	93	111	115	85	95	78	68	117	83	97	91	762	520	646	607	905
630	Metabolite_630	2.69	143.119	FALSE		82	143	229	119	117	115	143	100	94	118	187	258	174	184	197	136	154	226	116	135	164	140	165	191	117	523	692	419	658	1083	127	159	123	146	184
631	Metabolite_631	2.55	143.118	FALSE		243	209	284	283	215	116	104	140	144	228	698	693	651	756	764	133	171	128	98	126	90	136	42	65	106	68	83	53	58	92	155	342	253	185	327
632	Metabolite_632	0.65	143.962	FALSE		630	804	666	844	717	973	797	786	819	624	943	887	809	841	863	984	705	524	843	750	876	703	897	989	851	812	901	698	790	647	998	623	870	854	742
633	Metabolite_633	12.81	143.96	TRUE	97.96345:20 98.96576:27 99.96796:66 100.95844:44 101.96198:34 101.96935:20 102.93761:31 143.9744:20 143.98782:24	9146	9673	9274	10110	9789	9100	9200	9354	9610	9752	10323	10416	10169	10223	10453	10341	9662	10289	10706	10841	10220	9687	10194	10198	10266	9961	10412	10683	10213	10634	10041	9500	10566	10366	9899
634	Metabolite_634	0.43	143.962	FALSE		699	768	785	599	685	752	584	520	544	648	611	567	597	620	827	716	497	621	602	685	607	627	561	624	527	611	639	602	506	669	564	485	792	573	592
635	Metabolite_635	2.11	144.062	FALSE		721	778	700	718	690	463	386	492	404	481	374	416	464	434	390	261	263	237	208	342	231	188	198	198	178	121	139	159	108	90	181	217	193	198	213
636	Metabolite_636	2.03	144.065	FALSE		781	869	721	854	690	479	386	492	404	481	374	396	464	434	390	133	183	199	152	211	231	172	172	158	178	155	139	116	108	84	181	217	193	165	213
637	Metabolite_637	0.91	144.065	FALSE		711	831	751	798	735	454	507	492	657	529	461	318	340	445	349	836	1124	916	1050	834	833	993	1038	945	830	377	346	311	354	326	420	414	335	317	429
638	Metabolite_638	2.84	144.081	FALSE		747	776	823	742	789	451	321	365	387	383	651	674	479	656	587	408	395	353	425	494	384	530	373	304	320	728	519	750	661	675	224	268	300	265	243
639	Metabolite_639	1.38	144.101	FALSE		896	870	1140	777	687	831	595	586	608	586	559	563	768	633	637	310	335	387	313	325	279	327	356	362	254	171	187	144	172	133	799	1050	1040	619	782
640	Metabolite_640	0.97	144.103	TRUE	69.02993:16 70.06604:20 72.04264:20 83.00648:31 85.02948:33 97.02686:21 116.07275:18 127.04219:16 130.04419:16 130.05051:40 144.09985:174	4430	4186	3932	3873	3558	2861	2442	2396	2600	2642	3561	3705	3506	3427	3385	6502	6309	5531	5777	5828	7028	7228	7615	7673	7247	4467	3997	4262	3761	3527	2941	2986	3332	3379	3473
641	Metabolite_641	11.39	144.984	TRUE	59.05654:20 100.10551:20 103.9472:15 103.95529:146 103.96143:32 105.95407:34 144.98386:16	1927	2567	2877	2637	2372	1683	1773	2628	1936	1767	1929	1968	1897	2151	1754	2141	2463	2012	2051	2396	1644	2088	2430	1996	2476	2000	2242	2567	1866	1701	2025	2572	1988	1762	2063
642	Metabolite_642	12.63	144.983	TRUE	99.05301:54 103.95616:348 104.95679:38 105.95359:169 106.947:18 144.97888:98	12972	11629	13262	12387	12539	11462	12191	12857	13515	12510	13583	12416	12049	11454	12919	12694	11654	12703	12768	12610	13738	13053	14486	13283	9686	13227	12713	12815	12438	13019	11274	10487	11678	12056	11978
643	Metabolite_643	11.22	144.984	TRUE	62.92484:16 103.95098:45 103.95638:115 104.95898:24 105.9487:17 144.97644:17	2237	6082	4236	5504	5647	2124	4834	5927	4919	4756	2537	2427	4383	2371	4455	2443	2820	5425	2463	3088	3016	2944	2663	2334	2904	4400	5363	4041	2620	2285	5131	5349	2977	2358	2468
644	Metabolite_644	11.08	144.982	FALSE		2547	3180	2832	4715	4006	3622	1666	3850	1853	3646	1676	3127	2182	4270	2384	4116	3192	2920	3327	2136	1879	3433	1919	3083	3837	2797	2449	3947	4047	1878	1744	4261	4401	4355	4258
645	Metabolite_645	12.76	144.982	FALSE		11532	7438	7568	7667	7706	8147	10737	7628	7592	8129	8102	6798	7538	8450	7959	7544	7882	8258	7966	7796	7348	7988	9062	7183	7552	8970	7934	7874	10801	8033	7391	7463	6847	7550	7586
646	Metabolite_646	11.51	144.982	TRUE	103.95995:186 104.96635:41 105.95895:117 144.9865:19	4085	4296	4160	3878	4586	3803	4377	4334	4315	4094	2371	1787	1939	1778	1897	1539	1988	2149	1829	2177	1996	1905	1515	2616	2534	1701	2130	1841	1873	1952	4109	5146	5785	5711	4475
647	Metabolite_647	10.99	144.982	FALSE		3494	737	1427	3700	3203	1141	3240	3325	3214	1686	964	3076	3091	2995	3016	2820	3240	1383	3290	3007	2894	3101	3251	1518	737	1042	3218	1202	3033	2937	1338	1552	3653	1422	3815
648	Metabolite_648	11.6	144.982	FALSE		3541	3702	3749	3467	3573	3152	3716	2594	3894	3658	1663	1736	1704	2020	2121	2075	1608	1935	1856	2487	2122	2051	1994	2530	1921	1435	1855	1444	1567	1977	2991	3951	3774	3803	4108
649	Metabolite_649	2.99	145.029	FALSE		571	614	632	582	556	760	799	830	720	938	528	494	459	394	481	463	278	309	265	307	276	232	325	293	317	238	200	332	209	224	328	286	295	235	295
650	Metabolite_650	4.29	145.048	FALSE		676	677	633	675	517	615	582	455	489	504	207	195	282	237	196	330	300	285	298	327	384	342	350	395	348	233	137	115	128	104	994	1192	981	787	1001
651	Metabolite_651	4.02	145.05	TRUE	145.14131:40	265	238	210	214	226	270	218	212	190	287	251	181	206	184	254	290	271	300	358	327	330	245	246	284	268	164	150	154	154	131	935	1318	740	804	795
652	Metabolite_652	0.91	145.049	FALSE		4212	4025	1422	4625	4170	2663	2343	2318	2450	2317	3386	3352	3095	3640	3168	2293	2030	2235	1981	2131	8185	7981	1178	8161	1061	765	5431	5285	5343	6007	1378	5728	7031	5937	5361
653	Metabolite_653	1.1	145.049	FALSE		2230	2383	3082	2808	3194	3431	3145	4509	3480	4645	1664	1641	1797	1183	1336	4331	3516	4181	4022	4006	4776	3952	3417	5594	4305	2465	3413	3142	2552	2491	3148	3916	3867	3478	3536
654	Metabolite_654	4.15	145.05	FALSE		265	218	210	214	226	174	218	185	174	183	251	181	206	184	254	290	271	300	249	327	254	251	262	284	268	164	132	167	154	131	627	664	756	522	723
655	Metabolite_655	1.93	145.05	TRUE	68.99388:20 127.0383:16	1522	1578	1596	1516	1516	1853	1839	1824	1810	1853	1041	983	931	1108	972	710	696	631	724	564	602	710	553	570	756	245	216	295	352	205	1615	1656	1509	1341	2030
656	Metabolite_656	4.64	145.049	FALSE		221	167	225	188	156	154	226	156	185	317	86	104	95	95	156	190	226	237	159	120	183	261	222	201	232	102	122	186	135	74	890	979	854	823	982
657	Metabolite_657	0.97	145.051	TRUE	81.0694:19 84.0358:20 84.04321:20 85.02832:25 87.04261:18 97.02875:17 127.03443:18 144.10039:50 145.05023:17	3757	4198	4326	3940	4235	6377	7095	7120	7463	7517	2987	3139	3030	2660	2713	7590	6840	7391	7612	7495	8219	8232	7647	8495	8113	5198	5591	5371	5383	5427	5479	5867	6548	5960	5290
658	Metabolite_658	2.44	145.088	TRUE	125.06132:20	319	462	355	326	369	610	709	685	853	701	174	115	133	104	119	200	245	187	226	215	170	212	234	208	169	69	66	94	70	109	1615	2792	1493	1330	1765
659	Metabolite_659	2.36	145.087	TRUE	103.03827:63 119.04524:35 127.0712:27 129.01338:16	392	533	378	352	369	656	690	685	726	731	96	115	133	104	108	200	245	187	226	215	170	212	234	208	169	86	80	94	70	109	2299	2557	2186	1653	2341
660	Metabolite_660	2.6	145.086	TRUE	79.05087:20 85.06207:20 145.0779:17	180	190	167	177	145	277	216	149	235	211	174	120	100	80	94	94	140	60	62	82	102	94	72	97	93	49	64	46	57	45	1388	1771	1523	1422	1928
661	Metabolite_661	14.96	145.927	FALSE		999	863	1217	1037	615	835	926	1141	905	879	814	523	929	963	837	1275	775	1119	998	811	583	979	924	937	1028	821	879	937	722	813	975	1006	1073	938	930
662	Metabolite_662	13.82	145.927	FALSE		1006	1219	1446	1156	1012	875	1283	578	1186	1018	1151	1242	1384	1070	1234	1266	1041	1230	1215	1451	1186	1069	1053	1278	1012	1013	1156	1405	1177	1498	1117	1082	1187	1171	851
663	Metabolite_663	13.69	145.93	TRUE	98.96897:16 100.94113:17 112.94803:16 112.9627:85 130.97195:20 130.97914:16	1102	1267	1253	1100	610	1027	1186	1158	1045	1090	525	1440	1269	910	1220	1258	1036	1592	1211	1083	1428	1229	1032	1210	1117	1081	1272	1549	1319	1138	1435	1281	1065	1034	875
664	Metabolite_664	13.94	145.927	FALSE		1053	531	1446	1176	985	934	1088	1053	529	1342	1279	1233	1384	1192	1218	1198	907	1163	1190	1206	1033	980	1004	1191	1015	1211	1247	1405	1401	1498	999	1063	1420	1114	886
665	Metabolite_665	0.58	145.933	FALSE		710	748	751	787	880	776	858	918	1044	847	1161	857	785	631	874	786	816	754	993	637	852	834	745	929	686	782	693	805	642	849	968	780	843	808	804
666	Metabolite_666	14.39	145.928	FALSE		911	1063	947	1257	1020	1127	1137	1073	1044	1107	958	1314	1344	933	1135	1603	993	1261	1183	1234	1173	587	1048	1217	1145	789	1124	1042	996	986	920	1250	1202	1072	991
667	Metabolite_667	13.33	145.932	TRUE	96.95815:17 98.96404:29 98.96801:17 112.95791:60 125.01885:18 128.94495:16 128.97981:22 129.94775:18 130.96864:20	1055	1467	1389	1273	1320	1026	1273	1424	1162	1278	1302	1454	1312	1242	1631	1316	1052	1398	1337	1381	1667	1400	994	1413	1582	1177	1454	1485	1445	1527	1258	1279	1357	1313	994
668	Metabolite_668	1.73	145.932	FALSE		340	447	499	332	546	639	639	658	684	614	342	406	326	263	424	745	625	706	651	844	897	815	760	960	644	779	979	1065	983	1027	423	431	556	503	393
669	Metabolite_669	13.56	145.933	TRUE	94.9726:18 101.97376:21 112.96304:73 121.0278:53 128.9518:19	1019	1401	1241	1212	1169	1191	1316	1361	1213	1009	1111	1343	1525	866	553	1263	896	1478	1255	1182	1352	1229	1068	1301	1583	1212	1699	1481	1024	1053	1447	1201	999	1093	1011
670	Metabolite_670	13.44	145.933	TRUE	96.96138:26 99.97:17 112.7534:16 112.95139:28 112.95796:16 118.94644:16 129.77664:19 130.96681:121	839	1260	1192	1309	1250	948	1387	1373	1199	1196	1322	1198	1706	929	1211	1371	974	1191	1088	1348	1288	1410	1101	1064	1583	1498	1320	1365	1225	1081	1430	1091	1269	1108	905
671	Metabolite_671	0.66	145.931	FALSE		902	1250	1212	1240	969	814	923	1035	914	1021	1039	1035	1276	878	1255	1000	908	1045	1028	955	1293	1203	989	1138	961	997	617	720	1044	664	1034	989	1128	988	1230
672	Metabolite_672	1.64	145.934	FALSE		303	421	482	362	517	545	584	642	632	579	333	394	406	246	297	579	582	627	653	829	749	683	607	667	531	990	794	1030	829	928	574	431	449	603	394
673	Metabolite_673	12.8	145.956	TRUE	91.0558:16 145.17659:36	3749	3029	2638	2868	3935	2406	3647	2574	3705	3914	4026	3562	3009	3940	3921	4044	3462	4033	3214	3723	3852	3617	3818	3569	3005	3679	3694	4048	3581	3387	3759	2217	4059	3186	3609
674	Metabolite_674	12.64	145.979	FALSE		674	839	788	690	681	793	691	852	714	2876	723	730	784	873	638	771	605	730	824	623	615	637	696	800	737	674	2955	690	713	823	725	674	1077	699	793
675	Metabolite_675	0.98	146.047	FALSE		992	711	650	1115	727	749	1014	874	1303	850	736	610	518	481	502	796	702	830	794	735	727	783	995	737	844	562	522	537	567	534	1232	1341	2023	1321	1437
676	Metabolite_676	0.97	146.05	FALSE		1056	711	679	740	770	874	1156	1228	1393	895	495	614	555	537	917	1022	1035	1093	1050	752	1095	821	1087	753	1188	602	872	537	767	534	1955	1341	1396	1321	2093
677	Metabolite_677	2.84	146.061	TRUE	91.05275:77 91.48785:18 118.05901:19 118.06577:112 119.04982:84 120.39836:17 144.08258:50 146.06238:115	4937	4783	4765	4617	4766	2207	1786	1931	2052	1953	2977	2832	3057	3091	3183	2031	2384	2402	2307	2233	1421	1473	1447	1707	1437	4111	3345	4458	3750	3875	1293	1351	1067	1136	1341
678	Metabolite_678	0.96	146.092	FALSE		653	1280	687	651	754	782	667	557	580	561	494	832	581	844	576	502	489	515	570	480	458	699	521	793	581	554	531	514	640	419	1048	866	854	1902	1000
679	Metabolite_679	1.36	146.095	TRUE	97.96564:16 98.09736:17 102.04605:55 128.95667:20 146.09427:21 146.10063:50	448	587	645	532	484	497	463	415	426	486	434	408	403	474	460	343	350	340	422	434	290	373	401	349	417	275	170	246	161	316	1372	841	849	894	1268
680	Metabolite_680	0.91	146.118	FALSE		759	1019	936	902	552	524	699	707	774	617	409	424	463	613	473	402	634	642	376	341	530	597	579	515	554	548	403	410	563	369	759	752	814	682	554
681	Metabolite_681	1.94	146.118	TRUE	69.06993:16 85.02819:20 99.03953:24 99.97234:16 100.11156:192 102.05368:16 130.05081:29 146.11676:58	1265	1318	1293	1014	1008	240	243	191	351	199	3727	3993	3513	3890	3198	1377	1392	1365	1430	1277	629	515	854	992	569	332	411	278	376	303	221	156	197	193	256
682	Metabolite_682	1.64	146.125	FALSE		444	448	453	394	482	305	339	285	356	364	528	545	469	552	575	459	513	427	461	433	497	647	501	609	528	136	108	96	165	214	422	536	486	627	500
683	Metabolite_683	13.71	146.943	FALSE		791	619	742	614	646	687	688	1076	632	748	937	858	810	634	722	744	629	567	884	779	695	1015	576	694	613	551	599	811	707	691	787	740	712	760	783
684	Metabolite_684	13.91	146.946	FALSE		696	781	956	760	764	641	747	901	749	688	969	710	675	706	754	918	628	743	800	693	680	697	544	694	911	761	797	700	713	800	704	598	660	803	816
685	Metabolite_685	11.05	146.98	FALSE		1114	2617	1957	2494	1080	2012	861	879	2041	2215	2442	1887	2153	781	1875	2238	1203	2365	2186	2168	2119	2072	2138	2209	2121	1950	1970	1599	2047	2173	788	1686	2042	1626	1074
686	Metabolite_686	12.63	146.982	FALSE		5775	5906	6179	6031	5693	5111	5758	5723	5984	5604	6000	5883	5592	6397	5056	5750	5700	6353	5585	5876	5941	6038	6780	6200	6242	6025	5996	5771	5946	6016	4499	5203	5433	5474	5557
687	Metabolite_687	11.22	146.983	FALSE		1344	1741	1374	1823	1727	2208	2368	1723	1194	1158	1282	1478	1304	1388	1464	1439	1417	1526	1533	1778	1235	1518	1259	1483	2202	1220	1513	1316	1516	1708	1531	1195	1446	1685	1411
688	Metabolite_688	12.76	146.98	FALSE		3958	3161	3587	3563	3452	3733	3623	3303	3443	3769	5549	3304	3485	3998	3793	3259	3659	3604	3590	3669	5734	3581	6634	3350	3469	4217	3633	3864	3655	3504	3472	3494	3175	3455	3950
689	Metabolite_689	11.31	146.983	FALSE		1479	2615	1352	1823	1673	1136	1391	1805	1194	1071	1123	1068	1232	1321	1329	1439	1403	1432	1501	1557	925	1199	1122	1167	1441	1093	1320	1166	1415	1327	1176	1235	1302	1099	1111
690	Metabolite_690	11.59	146.98	FALSE		1844	1752	1802	1736	1679	1573	1431	1937	1802	1873	1344	1282	972	1103	1350	1093	1251	1123	1015	1421	1243	1145	1133	1212	1090	857	1291	974	1474	1163	1866	1815	1904	1776	1415
691	Metabolite_691	11.46	146.982	FALSE		1796	2323	2096	2258	2417	2182	2172	2346	2234	1743	1600	1180	1114	1535	1189	1311	1417	1707	1445	1227	1095	1210	1120	1226	1467	1361	1272	1372	1231	1299	2144	2052	2217	2221	2015
692	Metabolite_692	1.64	147.029	TRUE	63.00903:20 89.54042:17 101.96477:23 104.01191:23 111.00268:17 129.01538:129 147.10919:19	2011	1920	2348	2052	1746	891	789	643	933	885	3167	3369	3285	3712	2811	864	747	849	741	713	603	939	581	617	737	436	508	481	652	572	1891	740	2228	2212	2916
693	Metabolite_693	1.7	147.03	TRUE	68.98474:30 69.00074:113 74.02798:20 87.0108:47 109.94756:20 111.01139:20 129.02348:221 130.05267:28	2230	2653	2028	2290	1890	863	755	571	1093	864	3415	3922	3609	4295	3454	1031	747	1061	754	954	950	1119	978	895	878	1376	1277	1263	1258	1217	3096	2853	2282	2083	2758
694	Metabolite_694	1.43	147.031	TRUE	68.9949:68 69.99282:35 74.06074:24 84.03985:29 85.04418:46 87.00871:28 87.01419:22 100.11968:30 104.0528:60 106.02854:32 111.00663:113 129.01851:120 133.0291:123	1217	1257	1221	1166	935	549	458	421	429	515	1678	2511	1410	1432	1579	304	504	470	425	448	424	414	380	406	584	681	474	641	600	589	1569	1409	1252	1340	1564
695	Metabolite_695	2.83	147.045	TRUE	91.05408:18 106.90338:18 119.04487:17 119.05062:24 119.05839:17 145.0847:39 146.06104:19 147.0381:50 147.04675:27	2005	2129	2372	2353	2876	4195	4201	4470	4662	4368	1359	1211	1042	1159	1161	819	847	787	791	764	954	1102	989	1029	1015	752	604	559	525	606	1459	1413	1132	1245	1346
696	Metabolite_696	10.87	147.043	FALSE		329	246	348	195	271	243	161	181	229	197	224	287	202	212	270	239	224	239	372	196	470	755	349	688	276	239	175	234	260	152	190	222	219	308	151
697	Metabolite_697	3.31	147.045	TRUE	65.0389:16 92.05399:27 119.0456:21	16564	19246	2610	18061	2367	33467	32769	4104	4605	33697	8841	9724	9352	9302	8357	2239	2236	1746	1949	1868	4641	5067	5010	5186	4964	821	722	672	692	674	6541	7070	7247	1102	8398
698	Metabolite_698	3.02	147.043	FALSE		1893	2064	2041	2077	1959	3065	2994	3000	3570	3121	881	1118	861	952	958	580	626	518	411	493	1056	792	904	920	1232	260	237	220	272	206	712	852	639	592	592
699	Metabolite_699	3.41	147.045	TRUE	91.04318:18 91.0545:55 91.06023:16 119.0438:240 119.06056:36 120.03899:18 130.07562:20 131.08464:21 147.03712:106 147.04536:542	14601	16732	17637	15561	15734	27372	28072	28954	30878	30645	8563	10310	8838	8926	8457	1603	1671	1563	1864	1785	3650	4091	3475	4656	4566	626	894	717	1150	794	6313	7081	7091	6504	6362
700	Metabolite_700	3.67	147.044	FALSE		2118	2261	2452	2214	2281	2823	3032	2973	2966	3144	1022	1289	1031	1098	1017	1282	1081	992	1233	1342	460	383	615	631	438	333	244	307	235	290	314	406	365	287	513
701	Metabolite_701	4.26	147.045	TRUE	78.22492:18 91.05238:48 91.05726:116 119.04811:382 120.05093:115 120.06029:27 147.04388:1060	26243	26720	26354	26588	26215	46159	42003	44600	46090	44718	4273	4333	4226	4352	3950	348	309	364	294	381	695	869	588	790	810	478	183	159	175	143	309	244	302	228	258
702	Metabolite_702	2.69	147.045	TRUE	65.03687:25 91.05152:39 119.04929:78 120.05056:18 147.04289:272	6117	6946	7013	7511	6684	6124	6696	6763	7511	7451	1719	1729	1664	1634	1586	364	380	424	438	375	582	508	502	484	484	297	211	175	190	172	749	933	696	892	716
703	Metabolite_703	4.38	147.043	FALSE		11760	15775	17952	16958	16425	23218	28610	27078	26985	29012	2109	2639	2360	2316	2181	271	243	335	274	242	526	519	383	534	419	191	148	133	175	134	218	244	177	196	232
704	Metabolite_704	2.23	147.045	FALSE		295	288	269	250	235	299	465	382	395	469	257	430	212	263	300	701	1000	680	737	799	1145	1163	1353	1250	1186	536	448	464	484	517	247	292	379	238	493
705	Metabolite_705	12.2	147.043	FALSE		87	68	41	98	57	69	56	64	39	73	56	301	81	72	52	142	124	141	295	122	329	163	141	616	113	58	75	83	102	55	71	64	81	92	77
706	Metabolite_706	4.13	147.045	TRUE	57.22215:17 65.04184:17 73.04893:24 79.54122:16 89.51276:50 91.05843:283 108.61256:23 119.03864:43 119.05502:781 120.05779:18 123.83093:26 147.05112:1645	27955	30529	30594	29993	29069	48370	47517	48291	50798	49794	2852	3312	2879	3193	2714	304	345	296	320	311	336	358	444	441	461	350	192	159	180	163	1208	1273	827	920	1141
707	Metabolite_707	3.15	147.044	FALSE		3172	3452	3245	3364	3251	4197	4827	4703	5107	4896	1070	1099	1032	1037	958	552	727	545	596	481	942	1009	1076	943	1034	333	251	212	278	251	596	640	736	541	590
708	Metabolite_708	3.2	147.044	FALSE		2832	3205	3030	2968	2740	5336	4748	4933	5678	5687	1265	1370	1371	1297	872	2369	2380	2098	2113	2165	4581	5403	5121	5075	5104	895	878	684	1072	852	1310	1299	1029	1164	1351
709	Metabolite_709	3.87	147.044	FALSE		915	1020	864	932	827	2418	2211	2189	2484	2517	753	897	836	914	742	370	265	397	253	285	389	304	407	399	270	212	167	213	157	136	589	671	555	770	805
710	Metabolite_710	4.04	147.044	FALSE		1198	31135	1349	1246	29768	2297	47843	2210	2349	2162	1230	1533	1345	1441	1213	322	363	317	339	321	329	388	420	441	422	350	192	151	180	163	941	1099	764	832	867
711	Metabolite_711	1.83	147.045	TRUE	87.96336:21 113.9629:24 119.04436:68	1593	1804	1699	1640	1512	1046	1013	1046	878	971	1487	3284	2622	1397	1461	2816	2768	2690	2601	2714	2734	2997	2636	3072	2743	3949	3821	3671	3649	4042	2209	1530	1957	2121	2270
712	Metabolite_712	10.37	147.045	TRUE	88.07948:38 119.04813:24 119.05931:31 147.04965:52	96	105	103	135	117	114	116	160	93	138	116	252	99	105	126	360	613	502	825	472	1482	2254	1206	2254	1264	94	307	101	104	97	171	151	121	234	132
713	Metabolite_713	10.98	147.046	FALSE		329	255	348	277	271	260	213	192	230	286	265	287	273	280	290	239	283	267	372	306	483	759	322	697	291	280	266	234	260	191	206	237	259	308	268
714	Metabolite_714	2.55	147.044	FALSE		657	797	1078	645	705	777	783	871	951	709	521	576	457	495	480	628	639	665	535	559	817	701	692	660	716	297	318	202	197	230	316	298	274	315	297
715	Metabolite_715	0.87	147.078	TRUE	61.02613:18 74.02589:52 82.01516:18 84.03108:16 84.04392:873 84.10233:17 85.04129:35 88.03946:17 101.06297:22 101.07121:98 102.05347:172 112.00658:16 118.14964:18 130.04811:1730 131.04861:156 132.05037:19 132.05589:35 147.07132:262 147.07883:187	48292	48040	46224	4775	43859	42990	42170	46632	45568	42280	41358	47351	42146	3802	41791	4634	44228	4424	45567	44678	23771	22836	22419	25660	22204	28009	23282	26169	22706	24137	13018	12232	14615	12838	17079
716	Metabolite_716	0.98	147.076	FALSE		1678	33645	31798	30185	29582	23319	28345	27707	30765	26154	24667	27210	24208	24116	25389	24101	19305	21285	22873	1966	10400	9884	7841	12127	1699	2252	10017	11634	9660	9385	6972	7809	7188	6231	1419
717	Metabolite_717	0.76	147.113	FALSE		486	627	485	463	384	319	305	387	300	302	587	602	513	593	491	471	435	482	292	383	429	453	461	426	466	954	919	776	884	1075	522	410	578	403	543
718	Metabolite_718	6.4	147.118	TRUE	119.08738:55	1260	1610	1575	1660	1429	492	430	543	447	681	505	581	643	625	540	95	79	64	66	67	83	83	107	81	102	84	64	57	72	104	687	651	608	636	826
719	Metabolite_719	12.74	147.931	FALSE		1145	1197	1242	1021	1326	1194	1200	1294	1074	1333	1216	1257	1370	1244	1315	1464	1098	1329	1373	1189	1512	1167	1117	1322	1071	1149	1294	1273	1229	1366	1208	1328	1508	1390	1312
720	Metabolite_720	11.1	147.933	FALSE		1781	1917	1488	1221	2028	1544	1402	1394	1725	1800	1293	2075	1230	1585	1570	1401	1388	1357	1804	1303	1295	1291	1755	1770	1518	1129	1838	984	1305	1340	1374	1196	1320	1170	1352
721	Metabolite_721	11.51	147.931	FALSE		1177	1475	1251	1218	1546	1327	1504	1234	1385	1813	1129	914	1080	950	1029	945	887	1044	871	1038	1025	735	907	975	948	964	927	919	919	912	1896	1842	1638	1862	1575
722	Metabolite_722	10.99	147.931	FALSE		1415	2078	1274	1398	1153	1762	1067	2174	1865	2154	1439	2080	925	1939	1388	1166	1286	2018	2124	2090	867	1316	1315	1383	1270	1984	1173	1509	2178	1358	833	1021	2079	1609	2092
723	Metabolite_723	11.62	147.931	FALSE		1410	1415	1281	1197	1080	1384	1275	1146	1633	1411	954	779	1068	752	1033	805	885	995	960	1038	1004	809	926	1014	969	964	927	1117	777	958	1495	1429	1354	1337	1440
724	Metabolite_724	11.2	147.934	FALSE		1391	1701	1861	1660	1614	1471	1672	1519	1701	1645	1135	1280	1070	1081	1092	1291	1353	1235	1417	1157	1420	996	1321	1456	1364	915	1183	1178	1146	1225	1308	1219	1142	1124	1350
725	Metabolite_725	12.63	147.934	FALSE		933	962	961	731	927	822	949	823	918	771	1022	794	803	755	891	668	669	759	860	820	892	1037	915	926	924	847	861	860	783	895	945	767	772	1096	811
726	Metabolite_726	12.42	147.938	FALSE		1117	832	709	761	913	792	704	880	677	986	908	912	812	688	989	931	738	916	870	897	899	742	1061	1000	756	885	789	877	654	831	780	813	1014	970	777
727	Metabolite_727	4.26	148.047	FALSE		2462	2759	2810	3377	2677	4785	4435	4357	4684	4646	550	675	539	531	588	125	105	122	121	124	141	129	172	190	129	114	97	73	63	75	124	73	159	110	94
728	Metabolite_728	3.42	148.047	FALSE		2214	1600	1537	1733	1573	2682	3096	2934	3441	3851	968	1145	1155	1001	1033	248	264	255	289	284	402	455	460	461	473	157	196	182	137	160	704	709	797	858	1126
729	Metabolite_729	3.29	148.047	FALSE		1812	1997	1622	2027	1892	3698	3202	3486	3704	3622	1132	1191	771	991	990	390	294	459	322	401	653	717	814	599	738	157	196	184	160	188	671	887	744	673	812
730	Metabolite_730	2.69	148.047	FALSE		793	831	857	827	822	782	964	848	890	836	361	306	316	307	277	146	232	151	159	187	154	202	182	197	242	108	78	84	78	147	214	255	187	297	225
731	Metabolite_731	4.14	148.051	FALSE		3066	3071	3765	3257	3242	5346	5605	5320	5492	5641	451	482	490	493	388	119	101	148	149	200	136	122	172	217	132	88	97	64	63	193	218	262	219	136	185
732	Metabolite_732	0.88	148.062	TRUE	84.04172:51 84.0481:23 102.05031:33 102.05674:48 103.0351:19 129.87859:25 129.97884:52 130.04782:219 147.07404:18 148.06041:55	42494	45056	42975	46040	40901	51739	53433	55578	55063	52774	18215	18727	17081	19610	18468	43368	39841	41358	40429	40098	31448	29842	30349	34214	30056	22975	20522	19111	20120	21391	43002	34865	42386	43410	44071
733	Metabolite_733	0.96	148.06	FALSE		6418	4506	4012	8381	8717	4973	4004	53786	53996	11492	2408	3592	16858	2977	19055	43534	40222	43260	7365	7073	4334	4803	2951	34192	4584	2645	20514	19221	3258	21599	7111	6108	6411	6363	42866
734	Metabolite_734	1.04	148.06	FALSE		5454	2657	3016	6625	8188	3410	7760	8965	9130	2888	3184	3428	3268	2985	3883	6338	5476	1444	6720	6094	3687	4003	3227	4336	3577	3313	3363	3208	3000	3052	1974	5967	6267	6456	5246
735	Metabolite_735	3.98	148.061	FALSE		232	273	275	240	227	475	399	386	474	419	233	335	267	258	241	151	135	107	107	124	116	117	106	117	93	99	79	84	66	76	555	635	300	246	380
736	Metabolite_736	10.38	149.024	TRUE	90.50522:18 91.44687:33 91.50414:24 99.51105:23 99.51571:32 107.07214:35 111.0172:72 115.96632:45 124.96086:16 130.04651:30 147.08231:18 149.02007:22 149.12772:84	3205	2525	3561	3111	2833	2765	3086	3048	3169	3917	2586	4086	2735	4843	2997	2881	2776	2924	2430	3778	3014	2898	3830	3552	2708	4697	2567	4304	2800	2864	3959	2713	3303	3820	5030
737	Metabolite_737	11.03	149.026	TRUE	107.08326:18 111.08298:18 147.11768:22 149.02386:53 149.09642:20 149.13759:16	1621	1284	1767	1991	1345	1389	1484	1320	1643	1250	2923	1664	2219	1844	3143	1739	1667	1455	1879	1672	1856	1632	1798	1357	1366	1762	1385	1693	1923	1748	1171	1496	1415	1833	1491
738	Metabolite_738	11.71	149.024	TRUE	106.90085:20 107.0866:39 149.02559:25	2297	1582	1474	1456	1622	2238	1511	1354	1444	1722	1792	1886	1840	2453	2105	1726	1996	1313	1792	1829	1990	1455	1997	1833	1698	2855	1516	2123	1773	1993	1503	1677	1507	1519	2115
739	Metabolite_739	7.73	149.025	TRUE	108.95879:17 111.01724:22 124.96086:30 149.01852:34 149.02556:119	6094	12782	8659	8636	5980	5692	14546	6772	6370	5304	8768	11417	16326	1839	6127	16971	7030	12189	10188	15442	9017	6193	7659	13301	8482	9094	15761	4771	11812	5879	3598	7370	7262	8154	9782
740	Metabolite_740	11.65	149.023	FALSE		2453	1633	1738	1726	1828	2524	1606	1707	1475	1900	1749	1973	2168	2742	2293	1858	1975	1409	1764	1873	2379	1406	2196	2002	2318	3009	1789	2182	1819	2256	1718	1759	1574	1750	2268
741	Metabolite_741	10.95	149.025	TRUE	149.02985:58	1756	1739	2070	1802	1899	1926	1798	1560	1841	2007	2602	1720	1987	2106	1650	1865	1895	1821	1659	2149	1809	2076	2402	1665	1775	2071	2005	1887	1914	2234	1666	1654	1342	1480	2049
742	Metabolite_742	3.54	149.024	FALSE		900	981	936	728	869	1143	875	982	962	782	692	703	919	754	700	696	1038	677	614	638	1089	1090	1044	1264	1106	563	534	482	437	469	946	912	1011	798	1058
743	Metabolite_743	4.59	149.058	TRUE	81.51986:18 107.04365:21 130.95848:18 134.00931:16	480	392	307	331	307	364	358	330	482	321	959	1055	931	1113	942	981	1020	627	943	957	1120	1119	1230	1151	1137	323	303	306	467	239	260	333	521	380	381
744	Metabolite_744	4.12	149.048	FALSE		526	567	623	689	590	855	837	662	777	870	434	447	338	459	425	489	532	446	408	417	444	413	511	553	450	487	527	628	457	431	375	569	457	436	416
745	Metabolite_745	3.16	149.06	TRUE	68.99497:17 89.51188:28 90.01288:42 91.0558:21 107.05078:16 107.05907:17 111.98875:16 120.05709:20 130.96503:17 130.97665:20 131.05519:20 148.05783:17	292	289	209	219	221	296	238	271	291	275	1473	1383	1358	1409	1338	338	381	411	438	388	247	267	210	245	205	147	136	141	91	103	126	176	159	164	238
746	Metabolite_746	2.35	149.06	TRUE	77.03538:16 93.05644:21 103.05042:19 107.04836:18 110.02123:23 130.96826:17 131.05249:31	1680	1785	1542	1599	1483	1550	1556	1284	1880	1568	1849	1809	1702	1851	1712	592	640	598	713	725	1046	1256	1118	1120	1099	1255	1122	1041	1061	1285	1074	1193	1011	1161	1430
747	Metabolite_747	0.88	149.064	FALSE		3368	3655	2927	3543	2831	3400	4031	3955	3808	3819	1442	1710	1403	1710	1678	3365	2677	2930	3199	3144	2451	2054	2141	2342	2012	1871	1587	1643	1245	1571	2863	2710	3139	2971	3092
748	Metabolite_748	3.86	149.094	FALSE		557	534	617	503	510	240	233	234	267	192	120	79	102	112	99	169	257	133	202	160	140	165	180	288	153	89	89	101	64	95	173	168	146	145	229
749	Metabolite_749	3.55	149.098	FALSE		429	358	463	418	564	502	408	365	437	468	158	167	216	220	149	1057	760	1013	766	1018	620	755	1013	686	753	380	369	413	306	368	504	647	460	399	529
750	Metabolite_750	10.26	149.133	TRUE	90.50632:59 91.0102:34 107.08524:50 110.02017:18 111.01051:56 111.01909:20 115.96496:17 124.9586:19 149.13611:25	1185	1498	1462	1658	1559	1292	958	1072	1239	1311	708	485	732	584	672	887	840	815	1208	928	131	196	165	221	218	102	124	190	92	90	4476	5884	4672	5658	4646
751	Metabolite_751	10.6	149.133	FALSE		939	949	1075	1411	1482	1071	787	997	895	1056	589	363	605	430	503	484	596	731	1135	768	139	157	122	116	107	95	96	78	92	59	3161	1115	3394	1015	3098
752	Metabolite_752	10.65	149.133	TRUE	55.05875:21 69.99124:29 89.50793:30 90.50893:54 111.02296:19 149.13622:73	803	998	961	1174	1304	1200	699	875	799	964	589	363	605	430	503	484	596	731	766	768	102	157	122	116	107	95	85	78	92	59	2833	3779	3124	3660	3087
753	Metabolite_753	10.93	149.133	TRUE	107.08696:19 121.02564:21 130.05724:27 149.13231:42	1093	1190	1286	1742	1870	1293	1041	986	1212	1217	843	720	860	809	809	882	623	1004	1458	1123	305	292	355	278	254	241	232	322	257	197	3111	3271	3568	3820	3655
754	Metabolite_754	10.98	149.93	FALSE		1424	1852	1773	1995	2106	1870	1465	1829	1170	1107	2160	1923	859	1884	2155	1292	1687	1885	2053	1940	1488	1857	1717	1059	2002	1294	1922	1233	1408	920	873	1482	704	1189	1794
755	Metabolite_755	11.51	149.929	FALSE		1178	1197	1348	1433	1512	1300	1588	1042	1153	1469	891	849	1001	820	1203	1125	1088	874	796	960	1132	973	858	1013	895	897	852	766	1023	1124	1431	1883	1390	1570	1293
756	Metabolite_756	11.1	149.933	TRUE	105.94858:16 119.09054:20 140.97861:18 149.02892:26	1110	1448	1206	1287	1204	1131	1064	1598	987	1203	1206	1240	1252	1238	1336	1032	1118	1298	1948	1268	1925	1136	1299	1291	1497	1463	1319	1280	1232	1394	1669	1284	1371	1393	1188
757	Metabolite_757	11.6	149.931	FALSE		1147	1115	1094	1112	1471	1056	1014	1353	937	1368	964	849	783	846	1488	886	1088	839	796	792	867	973	729	987	699	897	877	699	927	1124	1294	1026	1257	1203	1281
758	Metabolite_758	12.76	149.931	FALSE		1308	1205	1058	1194	1105	874	1011	932	1182	1040	1320	1227	1095	1263	1297	1158	938	1493	1129	1023	1087	1113	1113	1184	1249	958	1332	1062	1063	1154	1195	1147	1489	1070	1217
759	Metabolite_759	11.22	149.933	TRUE	107.08617:20 138.97865:24	1126	1596	1702	1698	1539	1424	1351	1503	1365	1371	1546	1100	1357	1141	1207	1062	1030	1157	1219	1055	1199	1110	1059	1288	1754	1405	1470	1160	1028	1366	1431	1254	1137	1137	987
760	Metabolite_760	0.74	149.954	FALSE		599	582	668	620	699	578	597	689	596	673	400	413	365	340	343	605	527	531	576	607	392	467	390	470	408	449	481	423	476	587	303	328	603	358	284
761	Metabolite_761	1.11	149.961	FALSE		223	146	154	179	185	135	157	214	151	174	121	129	194	171	185	508	255	434	376	357	408	383	327	328	382	959	559	940	994	605	271	200	304	243	210
762	Metabolite_762	12.96	149.991	FALSE		961	893	932	992	722	885	929	826	1010	981	829	1047	843	851	908	848	833	1012	1136	879	900	1082	780	1035	1022	1059	1225	835	850	681	953	886	882	1186	1109
763	Metabolite_763	7.71	150.027	FALSE		757	1219	921	1098	839	749	1556	771	829	686	1142	968	1602	279	710	1726	750	991	852	1543	778	804	912	1198	1012	917	1372	793	1218	713	464	805	827	1014	1044
764	Metabolite_764	1.13	150.059	FALSE		551	519	520	547	609	431	566	493	656	524	596	659	739	590	720	597	527	658	609	592	384	475	363	472	442	565	661	954	674	935	611	403	391	390	529
765	Metabolite_765	1.45	150.06	TRUE	87.00311:26 104.05139:19 133.02951:46 150.06851:30	1264	1591	1576	1344	1242	1468	1625	1335	1399	1628	2283	2536	2601	2431	2090	2749	1804	2135	2388	2247	1577	996	919	1407	1516	1127	1188	1172	1154	1120	1495	1014	1309	1384	1947
766	Metabolite_766	1.26	150.062	FALSE		548	467	521	514	569	391	545	454	640	474	505	606	601	517	591	560	475	598	506	542	363	327	296	304	442	545	554	460	514	657	594	446	375	373	478
767	Metabolite_767	0.87	150.071	FALSE		824	683	753	638	812	622	821	1048	696	502	326	353	406	360	270	766	688	609	510	542	465	578	624	543	519	390	298	412	481	303	744	672	620	681	728
768	Metabolite_768	10.27	150.134	FALSE		257	261	264	349	299	307	164	282	240	246	157	114	136	173	287	217	206	155	232	156	58	83	96	78	82	82	98	34	40	41	613	1017	695	924	799
769	Metabolite_769	2.24	151.018	FALSE		676	659	680	651	623	536	601	660	588	584	735	851	706	768	809	246	218	374	273	304	280	454	520	660	495	261	105	178	206	185	423	733	547	525	618
770	Metabolite_770	12.8	151.032	FALSE		547	561	473	400	409	561	331	493	345	492	599	636	662	806	620	435	515	450	451	446	322	458	476	290	378	371	411	424	392	366	494	535	358	387	552
771	Metabolite_771	0.72	151.037	TRUE	68.97468:36 68.97881:16 105.96529:39 110.00793:72 110.01368:23 111.01084:44 112.01224:18 114.98388:383 115.98099:43 115.99374:21 116.78846:17 116.9826:18 132.99626:16 134.99805:20	5850	6382	6859	6373	5251	5580	5557	6231	5906	5638	9312	10409	8872	8787	7604	3884	4278	3730	4395	4339	4297	3907	4128	4807	4129	2281	2026	1520	2064	2078	6862	6712	5619	6869	8064
772	Metabolite_772	12.78	151.036	FALSE		547	561	498	400	409	561	331	493	345	492	599	636	595	688	620	435	531	450	451	446	322	478	442	290	378	371	444	424	433	366	494	535	358	373	552
773	Metabolite_773	3.13	151.037	FALSE		702	678	610	664	640	280	300	268	384	380	466	443	363	445	364	318	470	482	413	358	661	651	594	615	649	337	219	224	217	328	482	491	448	473	567
774	Metabolite_774	2.49	151.041	TRUE	90.01603:18 92.51163:71 123.05112:16 125.02038:18 138.9884:20 151.04889:40	5746	4456	5404	4493	3868	3930	3474	2949	3889	2993	6841	6968	6837	9694	5605	1075	1146	1043	1315	1153	2768	3038	2376	2995	2957	174	131	132	172	123	524	549	504	477	546
775	Metabolite_775	3.46	151.038	FALSE		372	561	432	336	454	414	312	349	463	384	260	388	291	256	243	223	214	284	305	274	772	900	773	859	828	134	139	126	123	122	920	854	799	856	1010
776	Metabolite_776	2.73	151.041	TRUE	90.00769:23	789	635	605	597	533	534	512	406	575	423	652	792	814	770	659	221	278	215	286	228	389	361	358	496	426	172	141	211	117	153	1132	1057	924	937	1208
777	Metabolite_777	4.11	151.041	FALSE		196	154	213	160	132	153	137	125	137	152	281	173	171	260	159	542	466	682	522	544	418	584	472	563	617	750	642	737	697	656	177	156	169	183	219
778	Metabolite_778	11.07	151.052	FALSE		396	359	320	277	286	282	265	291	311	401	456	358	358	381	377	269	268	205	216	235	215	220	248	156	206	242	224	294	223	278	289	249	203	190	298
779	Metabolite_779	2.23	151.052	TRUE	77.02538:16 78.02986:38 78.661:16 78.9704:27 79.01622:20 79.0463:16 81.03252:24 82.02544:52 82.78362:26 91.02419:48 92.0371:17 93.01557:16 94.02874:17 97.02866:17 98.95707:16 104.03213:16 104.03854:22 105.04452:255 106.05202:914 107.0015:25 107.05659:45 110.02065:19 119.02369:17 120.03941:25 123.05109:16 123.82413:16 124.01704:18 124.03469:72 124.04097:134 133.0399:35 134.0463:1232 134.55995:39 1…	172004	174347	176245	161504	144670	127054	124595	115339	125501	120940	240204	261146	240532	258230	231973	7670	7042	6445	7173	6961	2534	2017	1831	2543	1854	1322	241	227	589	295	5282	3511	5228	4832	5985
780	Metabolite_780	2.39	151.05	FALSE		24183	4980	2910	4897	4350	18806	4126	2751	2524	19152	36525	40969	31785	8825	35205	1435	1075	1202	1334	1137	2650	2977	2599	2900	3327	227	128	153	226	136	712	624	804	662	736
781	Metabolite_781	3.84	151.074	FALSE		246	219	226	213	190	137	161	173	148	174	276	372	277	302	299	612	621	422	552	522	486	563	419	503	406	343	396	306	314	341	175	182	202	202	257
782	Metabolite_782	4.08	151.076	FALSE		156	153	174	146	156	240	162	133	153	157	162	150	131	171	142	743	845	707	780	638	686	707	635	853	734	698	360	375	487	370	193	377	166	182	186
783	Metabolite_783	11	151.096	FALSE		682	372	502	415	588	569	404	492	459	616	579	351	553	575	562	361	569	430	482	508	410	464	590	387	394	458	398	427	407	389	1482	1037	759	1069	831
784	Metabolite_784	11.09	151.109	FALSE		703	454	511	506	483	512	402	542	385	595	477	345	468	645	382	500	537	369	413	468	379	454	520	491	459	501	285	482	368	322	1263	1108	734	1018	728
785	Metabolite_785	2.83	151.113	TRUE	95.0798:16 110.02374:23 151.10652:40	164	148	200	178	160	509	446	327	438	377	125	166	131	150	141	360	426	370	429	407	1930	2050	1951	2146	2003	215	265	259	328	234	479	281	399	346	374
786	Metabolite_786	11.04	151.149	FALSE		364	239	254	205	246	255	183	175	270	238	277	232	263	407	320	238	248	153	290	218	262	207	222	231	194	257	222	281	191	252	346	231	347	312	292
787	Metabolite_787	2.23	151.273	FALSE		179	212	187	148	109	70	86	85	86	102	1097	1632	1107	1421	841	23	41	23	0	30	63	17	0	31	30	0	24	0	18	16	21	20	23	35	21
788	Metabolite_788	0.73	152.036	FALSE		1466	1507	1675	1532	1356	1357	1295	1376	1022	1399	1763	2204	1839	2080	1484	1070	1036	991	1149	693	862	828	923	1116	902	597	555	583	514	586	1510	1317	1097	1617	1746
789	Metabolite_789	2.23	152.052	FALSE		15238	14210	14703	13158	12035	10733	10749	9780	11259	10329	18923	20708	20087	21096	18276	967	751	707	893	810	603	607	595	625	492	256	228	214	254	243	661	467	607	573	624
790	Metabolite_790	1.95	152.058	TRUE	79.0191:21 107.00957:53 107.01523:29 110.03354:20 125.02337:18 135.02493:69 135.03349:92 152.05196:112 152.05878:173	5500	5077	5679	4750	5041	2946	2466	2673	2854	2724	7473	8752	7665	8042	7818	1062	1377	1288	1107	1462	821	1013	939	774	925	625	517	609	486	478	3001	2618	2147	2439	3507
791	Metabolite_791	0.91	152.066	FALSE		755	744	615	874	825	386	512	601	535	617	1979	327	333	473	300	265	238	225	338	269	297	250	277	262	213	258	180	319	189	144	598	618	645	805	605
792	Metabolite_792	2.68	152.074	TRUE	95.97285:22 99.01975:22 103.06355:17 111.04025:50 111.06818:36 111.98875:17	200	168	151	168	114	176	107	206	132	152	201	242	156	196	242	75	117	89	77	995	148	88	105	105	114	54	102	74	82	79	101	111	126	87	185
793	Metabolite_793	2.26	153.035	FALSE		1840	1439	1777	1821	1331	1147	1408	1291	1293	1230	684	2293	2000	2166	1985	480	423	468	427	401	554	603	570	547	567	240	237	225	286	236	871	830	918	641	1120
794	Metabolite_794	3.32	153.019	TRUE	125.02254:24 137.02069:18 151.04297:17 153.01262:37 153.0217:21	1374	1485	1312	1125	1420	1318	1129	1167	1249	1373	1038	984	1115	1092	990	636	826	877	847	955	1175	1092	1016	1196	991	338	271	310	407	379	852	611	630	677	705
795	Metabolite_795	4.51	153.02	FALSE		409	524	409	400	704	471	340	445	416	419	291	240	322	262	277	432	585	481	430	470	730	899	974	912	782	318	309	380	322	274	282	322	464	240	408
796	Metabolite_796	1.92	153.019	TRUE	107.00671:21 108.01345:35 110.03054:24 110.03585:16 123.01138:25 125.02502:36 135.00923:27 135.0218:19 135.02934:36 135.04309:29 152.05824:38 153.05345:21	2847	2990	2966	3083	2883	4031	3771	4034	3915	3911	1473	1923	2455	1442	2245	601	736	491	519	442	375	611	344	529	433	227	236	296	260	242	1608	1538	1429	1718	1897
797	Metabolite_797	2.88	153.019	TRUE	79.0181:20 89.50667:66 90.5041:18 92.50454:18 93.97906:17 99.51148:16 113.96797:23 114.09297:17 125.02715:24 127.09315:27 153.01932:172	3913	3966	3753	3872	3968	3280	2980	3199	3318	3409	2158	1801	1955	1951	1988	416	466	568	596	432	638	835	660	927	714	318	291	307	358	259	1186	1191	866	857	1209
798	Metabolite_798	2.48	153.018	TRUE	113.96588:17 125.02718:17 137.02765:62 137.03564:15 141.98369:17 151.06644:58 153.01413:17 153.02173:56 153.05949:19	1196	1160	1003	1018	963	869	783	993	1008	935	1672	1670	1739	1636	1611	330	272	333	396	397	616	499	392	429	368	248	233	289	318	276	737	736	695	671	882
799	Metabolite_799	3.81	153.018	FALSE		557	653	433	592	547	553	474	549	542	470	715	543	574	566	549	758	709	676	733	566	782	979	898	1011	862	622	495	478	489	452	376	377	436	523	543
800	Metabolite_800	3.56	153.02	TRUE	123.11149:16 153.01891:58	539	536	590	655	499	461	565	440	544	521	541	437	411	543	521	1372	1691	1487	1856	1698	2259	2806	2141	2749	2566	360	410	339	479	497	494	489	408	448	363
801	Metabolite_801	2.05	153.019	TRUE	53.00306:30 80.0153:21 107.00726:45 107.02055:24 108.01466:17 113.96661:23 125.02545:59 126.96128:23 133.9205:20 152.05069:16 153.00969:35 153.0163:31 153.02821:18 153.06113:23	2981	2951	2808	2707	2024	2316	1542	2099	2482	1879	4288	4479	4181	5057	4212	617	487	460	570	464	455	454	475	371	340	271	207	219	208	219	1848	1317	936	930	2357
802	Metabolite_802	3.15	153.019	FALSE		992	1042	1005	1152	1220	394	436	430	403	443	478	382	439	544	455	730	775	833	895	817	763	690	773	1114	809	1005	908	767	1072	906	583	554	522	612	427
803	Metabolite_803	2.63	153.019	TRUE	90.51027:61 93.0726:21 151.05087:18 153.01074:16 153.02585:28	1298	1536	1458	1700	1516	1596	1634	1675	1947	2051	662	510	547	560	485	327	391	330	314	352	514	417	308	503	391	228	242	250	303	307	344	392	514	382	427
804	Metabolite_804	3	153.019	FALSE		1636	2353	2516	2467	2449	1526	1756	2136	2292	2232	1386	1432	1373	1292	1190	695	866	843	891	875	1081	1122	1109	1165	934	562	447	589	545	564	608	692	538	582	557
805	Metabolite_805	4.08	153.037	FALSE		506	545	578	574	683	1057	674	756	735	715	597	483	479	556	555	1067	1161	966	1056	914	1825	1956	1945	2292	1741	562	361	398	396	406	407	371	450	387	470
806	Metabolite_806	3.93	153.018	FALSE		631	669	665	668	749	569	556	852	569	639	726	486	565	544	499	561	620	557	638	528	780	840	640	818	838	596	508	614	660	601	387	393	417	486	497
807	Metabolite_807	0.72	153.034	FALSE		1353	1218	1193	1026	1084	1091	1173	1048	1331	1289	1582	1881	1547	1673	1284	741	738	662	824	809	883	831	669	987	759	566	405	395	461	399	1228	1163	1084	1275	1471
808	Metabolite_808	10.84	153.053	FALSE		263	227	182	259	332	176	275	194	211	148	61	88	79	74	81	50	139	128	80	78	82	104	74	89	133	56	119	87	114	88	718	817	642	776	702
809	Metabolite_809	2.21	153.055	FALSE		1768	1423	1083	1346	1366	1093	940	1220	793	969	2099	2290	1882	2009	1743	340	353	340	325	300	383	411	411	383	390	175	201	194	182	226	745	667	802	612	958
810	Metabolite_810	11.01	153.054	FALSE		253	266	229	283	329	258	174	197	185	163	93	135	130	107	144	99	126	118	119	196	105	155	74	101	139	141	119	111	101	127	1401	1493	1513	1209	1428
811	Metabolite_811	4.13	153.055	TRUE	69.9939:27 93.03088:87 125.01846:19 125.05634:34 153.01155:16 153.05312:24 153.06381:18	178	212	164	199	168	230	153	102	181	124	162	245	128	231	244	1150	1100	1070	1355	1099	1880	2065	1888	2218	1713	456	294	297	304	222	139	256	169	204	196
812	Metabolite_812	0.97	153.068	FALSE		784	871	1003	770	778	689	735	684	882	742	803	834	925	1101	809	994	663	895	691	838	659	696	631	711	761	856	760	703	721	674	1500	1420	1677	1297	1396
813	Metabolite_813	10.97	153.127	FALSE		740	936	595	908	899	783	679	780	679	656	729	507	478	872	801	872	1148	937	610	670	606	873	840	558	1101	874	813	561	623	600	871	1157	745	775	956
814	Metabolite_814	5.21	153.129	TRUE	68.94682:25 85.0643:20 91.5093:20 97.02628:20 98.9607:21 99.08153:18 111.99091:24 153.0116:42 153.12473:18 153.13181:20	220	196	225	235	254	352	238	217	290	313	233	207	208	278	227	337	399	312	383	369	988	980	651	1176	1068	233	339	299	292	239	357	370	252	323	340
815	Metabolite_815	11.19	153.127	FALSE		477	663	711	576	509	512	826	805	974	450	560	463	403	536	421	527	807	598	502	700	342	741	520	295	617	483	528	445	370	456	673	675	613	533	595
816	Metabolite_816	4.58	153.128	TRUE	71.05017:34 81.95741:16 90.50399:40 111.02203:20 124.96198:17 135.11465:25	327	355	253	241	242	308	286	338	235	228	350	331	293	361	424	2164	2559	2521	2259	2678	940	2645	2665	3060	2670	812	631	672	694	512	820	1133	903	869	1325
817	Metabolite_817	4.87	153.127	FALSE		246	186	214	245	225	254	224	191	232	250	267	286	256	340	240	510	495	392	407	365	981	1150	849	1182	833	411	314	324	376	280	248	269	302	338	351
818	Metabolite_818	4.54	153.128	TRUE	71.05017:34 81.95741:16 90.50399:40 111.02203:20 124.96198:17 135.11465:25	263	355	253	241	242	244	286	342	217	228	268	331	293	328	408	2478	2563	2319	2963	2581	4026	4363	3473	4744	3539	715	623	639	694	512	890	831	758	843	1119
819	Metabolite_819	5.05	153.128	FALSE		302	361	269	284	328	324	266	332	259	277	309	249	289	278	229	362	345	312	294	318	491	576	465	570	483	241	186	263	266	234	885	783	714	970	1052
820	Metabolite_820	11.51	153.128	FALSE		287	532	445	463	591	279	434	433	396	261	395	248	400	404	351	359	468	398	397	334	250	291	360	202	427	308	308	361	349	274	267	546	164	407	251
821	Metabolite_821	3.7	153.127	FALSE		214	206	198	207	241	253	206	176	188	196	166	235	261	261	216	369	382	324	483	305	688	798	801	858	698	330	284	274	290	246	290	200	189	309	304
822	Metabolite_822	11.01	153.13	FALSE		712	925	560	860	837	685	630	747	758	557	633	473	507	733	715	767	979	811	610	604	549	916	756	560	1049	752	769	576	616	556	772	940	710	655	1095
823	Metabolite_823	12.8	153.959	FALSE		1118	1097	1055	1030	1076	983	1047	962	917	963	1249	1185	1118	1131	794	1151	1055	1249	1225	1014	1081	1033	1066	1163	1113	1342	1004	1182	883	1081	1030	1038	1174	1154	1316
824	Metabolite_824	2.97	154.062	FALSE		288	379	251	263	255	241	187	321	183	184	186	235	224	227	237	492	388	335	336	363	291	277	213	283	335	713	573	667	594	670	259	250	234	131	352
825	Metabolite_825	12.8	154.966	FALSE		1721	1982	1681	1919	1679	1590	1815	1735	1858	1826	1875	2029	1679	1824	1948	2081	1641	1854	1861	1853	2025	1701	1897	2019	1968	1830	1770	1809	1685	1842	1915	1879	2263	1967	2231
826	Metabolite_826	12.98	154.992	TRUE	86.94211:20 113.96418:137 117.40436:17 139.9938:17	3411	3864	3670	3269	3521	3172	3422	3690	3933	3788	3592	3419	3543	3431	3493	3893	3014	3781	3400	3309	4188	3299	3555	4316	3886	3281	3576	3512	3491	3423	3168	3256	3157	4075	4226
827	Metabolite_827	12.89	154.99	FALSE		2307	2667	2354	3858	3628	3440	3748	3826	2633	4353	3594	4320	3462	2625	3836	4455	2276	3998	2571	2387	3463	4087	2731	4506	2729	2970	3763	3561	2385	3525	2572	3214	3631	4006	3012
828	Metabolite_828	2.49	155.036	TRUE	111.00668:31 115.04004:16 137.02037:215 138.02737:18 139.00038:21	822	961	804	992	668	680	561	466	602	533	875	668	690	973	683	852	752	671	859	736	570	566	745	762	559	266	236	184	212	932	1766	2403	1964	1732	2513
829	Metabolite_829	2.85	155.069	FALSE		557	542	517	578	417	470	605	587	563	493	309	322	317	346	299	456	719	482	698	759	282	218	269	262	304	999	714	542	563	880	362	368	311	303	483
830	Metabolite_830	2.98	155.071	FALSE		185	156	159	180	152	187	139	111	168	148	109	221	113	127	93	546	573	511	442	592	361	430	446	407	497	1115	662	902	972	953	176	179	181	150	232
831	Metabolite_831	2.6	155.071	TRUE	95.05196:16 113.95872:18 123.04738:17 139.03705:21	927	910	865	859	606	482	492	532	602	543	259	281	306	314	270	690	1117	711	927	991	747	723	678	747	747	1309	1020	1050	1218	857	223	266	203	235	299
832	Metabolite_832	10.97	155.106	FALSE		623	250	402	283	706	467	333	219	469	507	272	258	279	304	320	232	242	270	203	181	206	226	258	215	185	233	168	183	197	229	1009	868	1244	1089	1172
833	Metabolite_833	4.31	155.107	FALSE		1791	1900	1723	1975	1610	540	494	423	662	393	220	202	220	176	166	150	122	119	105	147	111	146	119	79	103	133	72	159	94	99	184	94	102	119	162
834	Metabolite_834	3	155.156	TRUE	113.95959:17 155.14285:25 155.1535:120	2304	2231	2334	2540	2270	2710	2247	2098	2192	2053	2284	2177	2217	2693	2028	1664	1522	1526	1724	1462	275	383	328	269	476	453	362	459	633	436	1516	1531	1678	1498	1913
835	Metabolite_835	0.72	156.016	TRUE	111.01508:21 118.94252:21	1795	1970	2028	1650	1590	1601	1549	1587	1771	1516	2500	2757	2019	2710	2248	1310	1082	1333	1251	929	1280	1231	1356	1287	1306	761	699	543	632	578	1909	1799	2222	1983	2438
836	Metabolite_836	2.13	156.029	TRUE	95.07652:22 96.96136:22 98.03427:21 100.34376:18 116.9799:20 117.93345:18 156.02122:16 156.03157:61 156.03906:19	786	741	846	862	735	568	567	536	624	527	990	754	729	719	899	2887	2753	3272	1504	2839	457	422	390	360	263	2811	2765	2778	2512	2552	1341	1582	1415	1114	1393
837	Metabolite_837	2.14	156.031	TRUE	96.96362:16 110.97331:17 156.03584:46	767	804	947	865	847	568	567	561	624	527	883	783	627	640	761	2996	2772	2184	2744	989	457	422	390	360	263	2941	2833	2571	2589	1686	1440	1286	1730	1208	1524
838	Metabolite_838	0.83	156.062	FALSE		4165	3641	3387	1142	1127	1277	848	1457	914	1480	1034	1101	1061	1330	1061	851	821	1109	1648	2027	1368	1308	1394	1299	1452	6821	7052	8116	8331	7495	417	372	488	366	525
839	Metabolite_839	0.83	156.078	TRUE	110.07108:53 112.0876:16 138.07132:19 141.03749:20 156.07246:16	3377	3340	3198	3413	3195	1117	1357	1271	1463	1371	919	949	864	1035	862	1677	1737	1818	1538	1778	782	843	706	775	797	7152	6701	7724	8134	7806	436	372	443	333	341
840	Metabolite_840	2.7	156.082	FALSE		142	148	233	144	169	198	114	81	133	131	94	100	110	166	97	132	151	160	141	120	132	143	88	173	98	326	500	328	441	583	132	117	93	100	114
841	Metabolite_841	12.83	156.992	TRUE	72.99476:17 102.51324:21 115.98249:19	1395	1562	1570	1381	1468	1220	1527	1485	1521	1280	1372	1497	1481	1461	1562	1569	1317	1414	1424	1411	1411	1433	1344	1601	1420	1474	1469	1383	1443	1425	1514	1441	1761	1570	1495
842	Metabolite_842	1.7	157.012	FALSE		2074	3386	3512	3256	3113	1200	1165	1099	1340	1293	6046	6321	1716	5991	5658	759	907	883	967	975	566	719	541	642	717	226	247	184	216	178	3939	4177	3741	3629	4009
843	Metabolite_843	1.15	157.035	FALSE		1770	1902	2057	1953	1736	2006	2607	1918	2379	2126	2864	3163	3362	4192	3307	542	443	600	471	462	380	421	464	460	373	290	330	276	269	248	1776	2131	2008	2026	2798
844	Metabolite_844	1.45	157.015	TRUE	55.05164:18 86.3075:17 111.00581:42 111.01118:19 115.98383:17 138.99896:173 141.95306:62 157.00987:17	1226	1426	1727	1207	1338	734	649	620	664	780	2072	2772	3119	1851	1885	546	438	526	495	487	231	466	247	268	319	126	117	150	114	140	2126	2072	1979	1648	3469
845	Metabolite_845	1.66	157.015	TRUE	89.93752:21 97.97132:52 111.006:92 112.0135:33 138.99414:20 139.00278:52 139.0074:21 140.00188:32	3887	3132	3968	3174	3297	1200	872	978	1096	1018	4530	5296	6084	6276	5089	689	841	678	857	839	555	632	620	658	647	214	247	184	216	182	3855	4146	2994	3755	4454
846	Metabolite_846	0.98	157.028	FALSE		1399	1441	1756	1412	1254	1692	1848	1600	1719	1933	2674	2697	2934	2815	2713	508	432	544	483	466	575	689	565	571	537	662	564	497	564	458	1601	2187	1886	1227	2354
847	Metabolite_847	2.57	157.013	FALSE		423	434	367	359	351	287	321	290	297	333	892	1053	856	904	654	335	405	352	329	304	365	321	316	474	333	131	129	158	157	113	298	285	352	257	386
848	Metabolite_848	0.73	157.017	FALSE		594	565	576	495	518	538	614	542	603	513	879	1094	714	877	719	451	640	429	441	403	516	405	423	464	439	237	287	285	259	230	594	588	747	680	800
849	Metabolite_849	1.29	157.026	TRUE	97.97838:28 111.01654:16 138.95213:16 139.01239:43 141.96593:21	2212	2311	2036	2281	1806	2714	2483	2390	2646	2584	3385	1740	1400	1655	3418	513	498	699	484	543	454	443	326	384	393	290	190	214	259	190	2476	2914	3003	2861	3581
850	Metabolite_850	0.98	157.05	FALSE		1248	1240	1101	1093	824	1688	1678	1352	1554	1628	2511	2341	2570	2655	2428	391	369	467	321	416	596	634	543	630	539	547	531	498	484	465	1364	1789	1881	1659	1426
851	Metabolite_851	1.21	157.051	TRUE	83.04827:20 93.03626:41 111.0428:39 139.03842:149 140.05495:25	1804	1735	2482	1699	1375	2126	1764	1930	3093	2783	3722	4111	4082	4427	4066	326	413	466	377	458	260	236	201	314	222	194	195	154	194	208	2466	3010	3124	2698	3445
852	Metabolite_852	0.81	157.11	FALSE		229	231	165	190	242	211	159	251	239	248	61	78	89	72	84	329	481	708	367	376	293	422	352	351	264	2969	2459	3096	2906	2939	93	88	97	103	86
853	Metabolite_853	2.96	158.003	FALSE		400	451	348	366	312	473	291	358	310	366	365	327	387	435	307	429	629	327	321	349	290	326	434	318	301	495	437	332	355	375	330	372	430	356	466
854	Metabolite_854	12.96	158.005	FALSE		1027	678	725	780	813	1087	781	723	731	784	574	672	662	1021	616	862	767	654	876	796	649	829	964	658	635	990	573	729	626	748	795	694	569	634	1104
855	Metabolite_855	0.74	158.008	FALSE		608	441	446	411	497	430	450	453	460	376	608	792	670	611	567	461	395	376	330	311	437	355	408	440	353	304	291	231	350	351	529	362	591	578	588
856	Metabolite_856	2.55	158.083	FALSE		746	1039	917	831	979	591	704	807	645	622	335	571	526	397	369	215	180	187	155	142	149	192	208	136	125	95	69	99	76	114	275	276	272	243	336
857	Metabolite_857	2.96	158.081	FALSE		258	263	262	338	251	237	226	211	375	259	319	373	277	340	339	454	396	357	507	339	628	622	582	629	570	133	133	154	135	152	277	353	231	243	205
858	Metabolite_858	0.82	158.093	TRUE	110.0688:52 112.08498:33 112.09364:36 115.08662:40 141.05902:25 141.06889:16 141.95993:16 157.10423:19 158.09163:528 158.10564:70	340	303	345	383	340	545	396	347	285	458	134	197	177	224	209	824	1179	1284	981	1044	582	651	789	654	704	7445	6746	8015	7318	7294	116	171	106	117	159
859	Metabolite_859	7.19	158.154	FALSE		630	492	539	520	407	522	585	492	477	788	555	599	526	653	565	554	483	436	496	556	640	616	687	582	500	680	501	605	440	581	525	463	664	579	529
860	Metabolite_860	2.01	158.963	TRUE	68.997:53 96.95494:19 96.96088:16 99.97029:25	1793	1648	1882	1946	1619	1809	1897	2789	1790	2107	1640	1271	1594	1102	1216	1990	1669	1734	1995	2072	2269	1697	1840	2364	1824	1733	2101	1727	1595	2213	1386	1422	1631	1300	1646
861	Metabolite_861	3.08	158.963	TRUE	74.46017:16	2051	1372	1036	1508	1242	1438	1482	1625	1795	1652	1255	1345	952	968	1049	1388	1289	1685	1529	1483	956	1043	1111	1054	1036	1396	1473	1470	1339	1501	1590	1635	1414	1496	1725
862	Metabolite_862	2.17	158.962	TRUE	117.93254:18 141.96042:18	1305	1428	1466	2480	1479	1595	1358	1791	1563	1565	2019	1487	1742	1582	1654	1918	2356	2994	1624	1713	1663	1676	1508	3145	2714	1579	1171	1656	1271	1592	1593	1563	1442	1290	1553
863	Metabolite_863	2.83	158.963	TRUE	106.03831:27 106.99339:27	1808	1650	1978	1780	1909	2257	1350	1625	2234	1732	3564	3816	3367	3534	3313	2338	3186	2191	2163	3199	3273	2832	2958	2811	2087	4754	4391	4499	4189	4411	1494	1640	1461	1505	1613
864	Metabolite_864	1.26	158.964	TRUE	96.96157:17 96.96706:40 97.96604:22	791	719	867	849	870	785	783	886	806	861	616	655	700	474	600	1030	1119	1038	1179	1304	1158	1473	954	1380	1221	1230	1798	1275	1477	1363	1145	866	942	1110	1054
865	Metabolite_865	1.46	158.96	TRUE	96.96182:59 97.96767:69 97.97592:20 99.96893:16 158.04292:16	648	743	808	860	673	968	1099	1114	1129	995	467	473	444	432	374	1411	1002	1163	1070	1151	1311	1034	1369	1447	1145	1323	1278	1223	1216	1185	721	754	635	623	857
866	Metabolite_866	13.23	158.963	TRUE	74.954:27 96.96055:72 97.96919:120 97.97661:19 100.92709:46 112.95499:24 117.92883:47 117.9353:44 117.94138:25 139.95969:19 141.95734:160	7862	3968	8662	8027	7818	3762	6983	4610	7090	3637	8471	8750	8403	2871	3866	9609	8459	9894	8597	9195	3901	7492	2693	4967	3939	2901	10999	10844	10970	9656	3806	7558	5614	4326	6229
867	Metabolite_867	2.77	158.963	TRUE	106.03831:27 106.99339:27	2039	1625	1975	1780	1771	2257	1350	1702	1990	1611	1517	1512	1512	1549	1681	2534	2316	2152	2184	2316	3085	2438	2564	2623	2280	2591	2046	1999	2256	2165	1206	1473	1461	1212	1409
868	Metabolite_868	2.39	158.962	TRUE	103.05328:41 111.01325:24 120.08694:91	1519	1935	1535	1848	1643	2151	1709	3348	3221	3040	2077	1752	1880	1539	1656	2828	2590	2402	2801	2507	2974	2175	2338	2833	2023	1936	2136	1760	2404	1965	1449	1734	1506	1598	2914
869	Metabolite_869	2.25	158.961	FALSE		1224	1442	1366	1420	1274	1607	1594	2284	1674	1558	1299	1217	1101	1033	1313	2449	2602	2629	2497	2613	2805	2346	1957	2944	1900	1896	1922	1839	1911	1897	1475	1830	1472	1366	2467
870	Metabolite_870	13.37	158.963	TRUE	56.94366:23 96.95488:17 96.9669:22 97.95181:20 97.95817:31 97.96862:318 98.95995:34 100.92988:16 103.68903:17 113.96636:18 117.93372:18 141.95576:79 142.96555:30	3033	3227	4262	3339	3741	3093	3607	4062	3143	3842	4318	4127	3597	3287	3731	4598	4078	4093	4728	4292	4083	3395	3532	3826	3751	4223	5157	4464	4676	4467	3186	3146	3238	3170	2917
871	Metabolite_871	3.76	158.961	FALSE		727	768	1880	838	825	595	579	1592	776	638	1231	1375	967	1089	975	924	1061	1092	906	801	1120	1188	1091	1192	761	1449	1527	1150	1484	1134	558	615	636	515	1276
872	Metabolite_872	0.65	158.963	TRUE	89.93641:18 97.96651:61 97.97318:37 100.93327:16 115.94312:27 117.93073:37 141.95656:19	2815	2820	2815	2581	2722	2539	2716	2702	2499	2730	2725	2621	2512	2579	2522	2094	2434	2285	2466	2627	2857	2106	2316	3024	2354	2344	2566	2409	2378	2659	2868	2521	2834	2891	2914
873	Metabolite_873	1.37	158.966	TRUE	96.96299:16 97.96909:16 117.93077:17	567	483	655	764	635	879	823	854	1043	1007	469	536	573	384	472	1149	904	1206	1188	1182	1082	1066	1267	1472	1072	1215	1444	1018	983	1236	703	751	714	801	886
874	Metabolite_874	2.95	158.961	FALSE		1524	1699	1610	1634	1520	2804	1993	3023	1925	1924	1413	1492	1313	1540	1285	2046	2223	2336	2292	2333	1978	1621	1708	1779	1674	3270	3001	2034	3143	3124	2024	1980	2155	1835	2237
875	Metabolite_875	3.22	158.962	TRUE	90.95203:29 94.96944:17	1762	1876	1953	1585	2062	2076	2131	2312	2065	2307	2127	1933	2034	1746	1868	1368	1216	1444	2049	1486	1801	1083	1548	1516	1219	1565	1519	1531	1992	1146	1068	1107	971	1356	1154
876	Metabolite_876	3.36	158.961	FALSE		872	991	1048	1017	1020	827	857	1216	1025	905	935	1119	1087	1220	1189	1359	1321	1133	1309	1331	2439	1378	1277	2297	2143	1335	1288	1353	1407	1266	750	782	866	921	685
877	Metabolite_877	13.09	158.961	FALSE		6160	6765	3474	5809	5887	6767	6603	4856	4352	4241	3336	6026	5730	7462	5786	8877	2741	5101	7651	3729	7807	7097	7691	5588	6450	6835	8815	8652	6862	6778	6832	4220	4169	5742	5298
878	Metabolite_878	0.75	158.961	FALSE		2543	3106	3081	2887	3219	2715	2326	3131	3067	2825	3151	2946	2919	2735	2443	2552	788	812	938	2532	991	2362	591	985	2623	1275	1598	1375	1396	1538	3212	2661	2509	2829	3115
879	Metabolite_879	3.95	158.963	FALSE		956	1064	1164	975	861	916	877	1036	806	939	937	1118	894	820	901	1080	903	1107	1125	995	1181	1176	1042	864	826	1107	1230	1013	1201	1274	522	539	609	766	558
880	Metabolite_880	2.58	158.968	TRUE	95.97688:19 134.04448:18 139.00275:17 158.0063:54	1276	1346	1533	1339	1427	1591	1206	1410	1092	984	1181	1189	1440	1283	969	1487	1424	1407	1654	1477	1408	1595	1415	1739	1696	1668	1632	1524	1646	1679	1514	1618	1629	1422	1406
881	Metabolite_881	12.81	158.969	FALSE		1012	1108	1206	1183	1124	1109	1210	1170	1130	1093	1179	1286	1214	1143	1321	1272	1064	1264	1264	1271	1235	1156	1136	1240	1025	1192	1111	1181	1206	1087	1845	1097	2283	1124	1434
882	Metabolite_882	2.58	159.031	FALSE		182	337	210	161	246	193	129	147	133	243	134	223	131	161	93	110	107	98	104	109	104	98	132	112	132	132	144	104	147	90	257	104	128	101	138
883	Metabolite_883	3.77	159.045	FALSE		1882	1411	2052	1900	1757	1756	860	907	1522	1515	646	484	545	631	555	96	128	118	84	82	93	132	87	141	101	65	59	70	101	87	785	767	548	586	735
884	Metabolite_884	3.35	159.047	FALSE		388	446	430	486	306	287	323	202	255	231	642	594	639	582	641	796	831	817	911	727	1035	2163	1073	1072	1079	262	285	338	249	202	346	265	221	213	323
885	Metabolite_885	4.82	159.064	FALSE		191	441	265	268	221	204	230	141	546	253	456	399	238	158	255	360	176	253	383	223	283	189	550	337	232	230	382	353	257	483	222	299	269	318	296
886	Metabolite_886	2.05	159.072	FALSE		599	598	633	528	542	341	361	240	435	430	313	426	289	331	429	162	114	109	120	113	116	98	98	95	90	61	88	63	58	54	362	318	351	345	518
887	Metabolite_887	0.88	159.079	TRUE	115.08469:52 158.06541:21	1308	1280	1248	1240	1245	2734	2390	2705	2500	2621	464	613	514	488	505	531	537	558	532	576	406	311	471	383	366	699	704	808	700	799	549	470	522	519	605
888	Metabolite_888	2.84	159.093	TRUE	159.09569:51	4325	4086	4273	4340	4193	916	951	870	977	882	1482	1515	1555	1635	1376	1115	1145	1151	1185	950	821	817	701	776	866	2111	1684	1839	1875	1879	609	668	678	495	695
889	Metabolite_889	3.74	159.101	FALSE		1155	1878	1098	890	1649	561	612	469	601	529	131	203	246	139	177	379	491	374	355	389	456	430	350	485	499	134	106	137	152	134	1299	749	618	720	1289
890	Metabolite_890	11.44	159.117	FALSE		498	361	567	621	654	341	374	349	361	363	212	229	158	108	211	107	146	140	138	102	113	153	182	154	105	141	97	118	103	98	605	796	611	604	613
891	Metabolite_891	11.79	159.117	FALSE		255	159	169	164	310	362	182	126	143	318	164	95	268	117	256	148	140	100	230	144	103	97	89	116	112	159	124	92	104	85	890	623	846	1050	575
892	Metabolite_892	0.87	159.159	FALSE		250	368	433	286	373	147	198	151	181	239	657	828	638	727	786	34	38	38	55	82	79	44	23	28	51	51	47	44	41	39	364	314	297	324	222
893	Metabolite_893	13.17	159.969	FALSE		845	1017	1046	975	903	779	821	914	821	882	925	919	865	773	1207	925	672	1018	1039	950	1060	959	925	1030	1103	869	1074	854	940	891	936	990	1240	890	956
894	Metabolite_894	13.06	159.971	FALSE		781	1022	948	989	976	785	848	1134	1040	845	1283	1100	909	934	934	1209	857	1240	1012	1068	1265	1013	968	1258	985	873	1110	1175	1136	1096	948	780	1364	1019	982
895	Metabolite_895	13.37	159.974	FALSE		835	891	778	947	785	752	1010	957	1069	984	869	1112	1084	834	835	827	840	972	874	902	1001	889	818	921	978	830	1069	893	866	982	946	929	1083	859	703
896	Metabolite_896	13.25	159.969	FALSE		674	857	1046	983	776	696	1034	890	870	854	900	1158	803	716	1207	833	710	975	906	904	1039	959	802	890	1103	715	1074	845	940	899	963	990	945	835	743
897	Metabolite_897	7.77	160.016	TRUE	121.03688:31	134	255	144	190	224	107	222	127	97	166	87	66	76	55	107	81	47	63	62	87	83	74	70	86	51	67	59	43	68	60	1103	1137	1338	1233	864
898	Metabolite_898	1.39	160.062	FALSE		315	402	439	493	357	318	406	465	435	790	214	260	166	187	174	107	126	108	101	131	124	106	63	103	86	88	78	58	74	74	462	468	571	475	1033
899	Metabolite_899	2.84	160.095	FALSE		587	463	433	465	473	192	216	198	281	252	424	377	298	389	315	341	206	310	230	239	154	219	204	178	268	598	466	449	375	352	182	149	157	168	151
900	Metabolite_900	0.94	160.098	FALSE		1624	1863	1808	1865	1714	1387	1276	1386	1464	1393	928	818	850	1046	820	618	714	615	674	682	509	624	556	548	429	440	364	449	485	427	1607	1757	1482	1764	2113
901	Metabolite_901	1.4	160.106	TRUE	141.9575:20 160.13286:151	1269	898	1142	1402	868	741	1003	934	811	792	783	830	886	857	737	694	529	521	496	569	588	806	473	914	767	336	219	276	210	184	989	968	896	720	1178
902	Metabolite_902	1.77	160.108	FALSE		9444	11596	11725	10565	903	6425	6707	5968	8883	6965	8203	8825	8234	9225	7863	6259	5678	6266	6459	5295	7303	7848	7295	8861	7220	2403	2075	1943	1887	2053	10769	7539	9331	8381	12191
903	Metabolite_903	1.14	160.137	TRUE	60.08142:17 75.04362:18 96.96426:23 115.03498:20 160.13278:204	3652	3290	2687	2601	2753	1807	1770	1832	2030	1899	1865	2249	2035	2969	1918	2400	2793	2140	2814	2013	3291	3000	3732	4066	3375	1587	1041	851	1249	1086	3114	2678	3411	3229	3328
904	Metabolite_904	2.13	160.135	TRUE	85.09142:89 114.12082:49 114.12879:25 116.0184:28 142.11342:18 160.13196:110 160.1409:99	2906	3057	2897	2963	2499	1776	1588	1590	1891	1659	4929	5143	4487	5414	4577	3433	3365	3002	3296	3173	3253	3530	3197	3703	3108	728	628	636	598	587	3179	3426	3477	3065	3964
905	Metabolite_905	1.65	160.133	FALSE		1958	5942	5715	7329	2480	2944	4059	3841	3989	4862	4288	3549	5203	4522	4206	3400	3407	3385	3596	4103	2782	4677	3244	3049	4388	1147	1066	1292	1176	1050	4151	5926	4832	3583	4816
906	Metabolite_906	1.76	160.135	TRUE	60.08138:34 61.08477:25 72.08126:29 89.50951:25 120.07238:34 160.10178:20 160.12415:161 160.13521:574	10309	11706	10928	9736	9462	6632	6374	6603	7905	6335	7624	8814	7981	8952	7547	5907	5763	5815	6337	5323	7040	7377	6794	8144	6969	2230	2038	1801	1765	1847	9605	7493	8887	8178	11548
907	Metabolite_907	1.4	160.133	TRUE	141.9575:20 160.13286:151	952	1526	1318	1438	1304	729	654	591	1071	647	681	818	635	729	697	620	580	693	544	655	609	526	739	616	823	293	266	263	320	276	776	746	686	1305	1617
908	Metabolite_908	1.07	160.135	TRUE	160.13174:93	4364	3808	3475	3386	3441	2429	1996	2166	2378	2183	2251	2605	2360	3272	2391	2692	2988	2397	2814	2385	3656	3175	3899	4035	3337	1585	1033	964	1224	1111	3282	3212	3634	3294	4069
909	Metabolite_909	12.93	160.948	FALSE		293	188	147	216	174	322	152	193	242	217	228	196	209	344	229	241	430	232	205	209	303	229	623	218	221	312	169	209	197	262	232	395	281	164	405
910	Metabolite_910	12.8	160.981	FALSE		542	553	531	695	623	523	597	600	544	525	672	685	546	623	562	719	564	623	582	581	555	678	645	557	628	628	571	559	559	655	574	567	535	561	649
911	Metabolite_911	12.93	160.982	FALSE		519	502	517	590	647	635	821	669	585	530	563	515	709	583	634	574	640	606	599	738	544	564	517	622	579	522	745	524	679	707	586	668	515	453	493
912	Metabolite_912	0.74	160.992	FALSE		503	478	494	438	389	462	431	369	439	327	579	550	614	521	615	410	320	343	370	282	314	255	494	302	282	307	198	227	253	197	538	447	557	461	595
913	Metabolite_913	3.99	161.064	FALSE		788	587	609	640	632	506	486	614	697	698	623	587	515	546	569	294	507	438	447	547	239	254	227	416	219	190	144	190	239	807	459	541	641	648	618
914	Metabolite_914	3.06	161.06	TRUE	79.05076:24 105.06392:30 119.03816:25 131.04745:40 161.05904:34	798	805	882	827	733	1197	1113	1168	1055	1058	610	749	560	622	604	1014	1125	889	929	861	596	629	623	732	701	210	172	200	203	232	9149	9777	8301	7037	9906
915	Metabolite_915	3.51	161.06	FALSE		322	320	268	241	228	413	256	341	382	348	270	271	198	316	209	480	488	440	583	460	725	583	653	778	678	171	168	179	156	136	487	528	340	243	453
916	Metabolite_916	3.38	161.06	FALSE		322	362	352	271	290	431	390	370	583	448	315	327	336	316	487	651	692	602	744	707	651	678	600	713	654	311	313	296	262	187	487	757	496	451	558
917	Metabolite_917	3.84	161.097	TRUE	134.06177:19	226	247	181	133	202	282	210	171	158	200	673	668	672	706	567	1560	1770	1662	1669	1705	1041	1081	1053	1266	1134	877	919	705	897	789	307	427	270	265	487
918	Metabolite_918	2.12	161.132	FALSE		463	359	423	380	422	303	293	209	302	266	677	564	573	592	612	401	382	405	431	501	405	368	440	649	505	119	105	124	93	112	378	483	515	452	588
919	Metabolite_919	1.77	161.135	FALSE		1308	1270	1078	1127	1032	835	813	733	919	668	902	1041	919	1020	1181	900	875	838	750	651	746	937	899	765	724	305	255	250	284	272	1084	865	997	867	1363
920	Metabolite_920	3.07	162.063	FALSE		194	205	239	201	191	236	207	276	259	217	131	151	164	175	198	198	215	295	186	235	229	131	247	150	210	91	100	115	104	137	902	1059	1245	681	1454
921	Metabolite_921	0.92	162.078	TRUE	85.03468:43 91.04205:56 115.09766:21 116.06697:46 144.07118:17 144.07855:17 162.11006:20	2708	2950	2701	2916	2541	1479	1354	1456	1326	1424	746	830	657	825	948	770	774	914	671	811	750	645	760	755	737	397	464	411	319	349	962	710	771	703	789
922	Metabolite_922	0.97	162.112	FALSE		968	782	762	737	708	825	494	714	691	527	533	476	497	784	404	973	931	823	969	1214	1842	1646	1740	2185	1746	828	488	792	582	513	696	733	787	426	737
923	Metabolite_923	0.87	162.113	TRUE	85.0304:20 103.03591:25 162.10849:33 162.11725:84	837	948	990	1011	839	692	744	753	691	660	541	547	497	708	404	1070	1049	976	1203	992	2428	2457	2720	2677	2430	697	627	700	770	661	548	371	407	419	578
924	Metabolite_924	3.87	163.037	FALSE		1309	757	1737	1871	1749	2214	2258	2305	2259	2317	146	144	115	161	119	229	147	214	140	244	171	202	180	216	203	103	122	138	101	122	268	318	220	228	271
925	Metabolite_925	3.1	163.04	FALSE		22339	1810	27683	26916	26638	38198	40946	2870	45975	43382	4218	3931	3657	3558	3439	209	230	230	244	394	325	291	296	305	324	224	232	379	170	224	2501	2847	2353	2079	2855
926	Metabolite_926	2.43	163.041	TRUE	98.96207:16 117.03101:22 120.07976:287 123.04085:37 127.07231:18 131.0477:52 135.05139:25 163.0312:18	1931	2861	1558	3135	2869	1923	2140	2535	2325	2337	388	246	237	225	224	329	301	262	337	279	416	520	540	505	551	170	125	83	108	129	234	317	375	278	386
927	Metabolite_927	3.67	163.04	TRUE	68.99426:28 86.59771:16 89.02918:16 89.03716:94 89.04094:43 107.04698:17 117.0325:52 117.04147:18 118.03697:29 135.0403:37 135.04747:170 136.0563:18 145.03058:57 163.03928:61	19657	22509	22411	22638	21910	27424	26635	3587	28711	27736	660	664	773	799	578	243	183	182	214	203	211	240	266	222	270	176	107	125	174	109	346	318	251	214	288
928	Metabolite_928	2.99	163.041	TRUE	77.03709:20 79.05583:18 89.03614:67 89.04068:48 89.82828:19 90.04739:23 117.0274:49 117.03361:86 135.03998:184 135.05002:82 136.04736:29 145.02872:386 146.03769:30 148.04678:27 163.03691:985	25589	29931	28551	28121	27087	44521	42894	42972	48064	46910	3858	4030	3952	4320	3685	427	373	337	369	386	310	348	357	332	278	226	231	248	192	346	2927	3543	2870	2647	3268
929	Metabolite_929	2.32	163.041	TRUE	72.96053:16 77.02707:28 77.03436:17 79.04992:16 90.5863:23 93.06882:17 103.05238:207 118.06423:49 119.06902:18 120.05957:16 120.07961:3109 120.0922:58 121.07966:36 123.03991:17 124.05209:16 127.07867:16 131.04617:103 135.04239:23 145.02563:55 148.07698:23 149.05406:37 163.03281:28 163.04166:62	2707	3469	3514	3805	3234	2808	3378	3004	3384	3424	351	275	305	264	265	176	209	134	171	195	240	201	306	210	237	144	125	93	107	129	259	168	132	205	178
930	Metabolite_930	3.58	163.038	FALSE		21276	25096	25603	25185	24699	1898	31107	1508	1874	1550	789	638	1116	829	563	243	183	182	209	212	267	240	266	222	266	170	118	125	174	102	326	289	292	269	288
931	Metabolite_931	9.7	163.041	TRUE	89.04019:17 124.96372:21 135.04642:22 147.05109:16 163.04237:46 163.04829:24	125	143	104	98	98	104	180	211	126	123	88	195	90	99	88	367	523	578	932	553	843	1411	740	1481	1011	106	231	81	156	118	158	94	129	199	86
932	Metabolite_932	2.88	163.04	FALSE		2719	2925	2696	3087	2576	6146	5733	5797	6201	6037	2797	2489	699	850	726	650	490	559	531	637	457	453	497	493	493	301	359	266	255	346	1584	1764	1675	1734	2142
933	Metabolite_933	2.73	163.04	FALSE		634	1233	562	607	656	810	513	500	576	706	349	332	298	591	382	331	144	193	179	162	194	216	189	293	170	167	137	127	126	104	211	254	218	310	216
934	Metabolite_934	10.95	163.04	FALSE		197	131	175	166	142	142	125	111	131	140	113	206	147	146	125	162	167	256	249	211	319	671	414	932	192	218	190	128	113	114	148	164	180	155	139
935	Metabolite_935	3.31	163.039	FALSE		853	792	785	727	820	1662	1559	1388	1694	1519	926	974	1018	1003	894	1045	1154	1039	1206	1028	382	388	358	361	351	199	158	191	156	205	368	467	466	284	507
936	Metabolite_936	3.42	163.039	FALSE		908	982	897	763	933	1364	1445	1448	1589	1373	925	1273	1017	1010	941	646	896	932	1178	952	269	362	313	294	299	135	158	105	128	125	300	448	466	269	452
937	Metabolite_937	0.9	163.06	FALSE		2046	2387	2014	2202	2374	2944	3569	3537	4086	3251	683	946	1600	909	934	1591	1431	1552	1418	1667	3920	1185	3315	4109	1169	2265	2616	2686	2971	2636	617	708	671	583	636
938	Metabolite_938	0.97	163.062	TRUE	61.02794:24 73.02785:20 85.02599:65 109.02805:20 123.05026:24	1474	2076	2039	2037	2082	3016	3356	3324	3505	3443	1612	1393	1507	1219	1572	3540	2620	3552	3464	3234	3630	3540	2955	3589	3447	2180	2474	2575	2592	2468	2692	2659	2944	3012	2378
939	Metabolite_939	4.3	163.06	FALSE		495	640	549	579	463	523	474	476	414	390	259	325	254	236	208	493	539	556	592	493	580	730	770	1017	688	247	304	198	313	277	1041	976	796	841	909
940	Metabolite_940	1.92	163.06	FALSE		491	465	530	414	579	725	657	703	699	717	165	164	145	219	130	134	144	184	212	189	187	261	161	237	250	192	114	163	170	169	291	281	253	204	330
941	Metabolite_941	4.02	163.06	FALSE		318	384	345	428	375	471	405	366	437	431	576	591	445	602	574	579	608	481	426	541	487	414	454	582	397	239	328	279	296	245	824	1128	634	713	738
942	Metabolite_942	3.1	163.074	FALSE		372	291	496	399	360	239	230	290	253	353	328	406	475	652	390	691	873	769	900	795	491	672	628	697	572	342	361	313	364	279	408	365	421	269	402
943	Metabolite_943	3.39	163.076	FALSE		483	507	922	564	506	559	477	484	648	442	440	480	442	375	496	736	803	799	651	752	823	743	829	990	804	276	224	253	211	297	479	487	402	389	575
944	Metabolite_944	3.49	163.075	FALSE		584	507	341	478	378	526	477	406	399	407	440	480	442	375	496	692	653	623	593	634	1075	982	840	945	873	276	224	253	209	297	463	469	367	379	556
945	Metabolite_945	2.33	163.079	FALSE		317	328	367	320	312	493	526	569	488	536	174	208	165	155	196	479	497	369	471	447	779	1025	742	1032	874	188	200	208	241	196	1286	1519	558	1572	1812
946	Metabolite_946	2.93	163.075	FALSE		241	264	251	287	185	504	514	277	329	353	226	248	275	298	208	419	468	502	505	365	333	335	484	414	510	254	297	260	236	200	2595	3164	2496	2151	2624
947	Metabolite_947	4.48	163.077	TRUE	103.05678:16 131.04514:29 131.04916:63 133.24704:18 163.07216:58 163.08043:20	482	481	469	448	447	653	483	629	586	499	580	754	546	546	579	2414	2894	2840	2833	2857	2114	2338	2115	2551	2223	662	323	370	392	408	703	745	746	604	864
948	Metabolite_948	2.44	163.097	TRUE	101.05451:36 103.05663:16 120.07429:33 120.08534:31 127.07169:24 128.93886:16 144.92308:16	248	262	278	342	325	482	458	569	463	490	135	126	142	126	130	315	400	344	338	345	649	820	734	845	729	178	200	165	194	149	2659	2347	2419	2353	2856
949	Metabolite_949	11.09	163.112	FALSE		1582	1453	1333	1330	4643	6026	2385	1611	826	2909	1007	511	1121	783	1324	290	584	554	546	521	481	916	419	964	644	254	321	207	214	204	1048	2198	1787	1722	1519
950	Metabolite_950	11.05	163.113	TRUE	123.05799:55 163.03174:16 163.11:18 163.15723:16	3798	3183	3023	3399	4586	6152	5006	4941	6278	5716	1053	511	1217	731	1319	290	584	554	563	537	497	804	399	948	644	215	321	207	214	204	2274	2094	1596	1588	1465
951	Metabolite_951	3.86	163.111	FALSE		298	428	462	328	333	194	182	150	204	157	118	230	136	143	127	345	406	308	285	319	237	303	302	325	285	184	246	202	277	158	292	337	232	347	334
952	Metabolite_952	3.5	163.112	FALSE		387	346	326	371	290	313	473	342	378	396	146	195	81	118	93	514	491	484	446	469	376	304	313	382	287	400	385	481	463	352	142	159	110	106	161
953	Metabolite_953	4.13	163.114	FALSE		175	203	246	215	227	319	478	432	371	391	193	211	155	234	156	641	783	543	634	607	454	463	447	467	367	230	256	252	216	209	158	222	153	139	169
954	Metabolite_954	4.75	163.133	FALSE		995	893	935	853	790	891	796	864	882	717	607	747	686	639	618	1115	841	924	1009	947	983	657	927	1042	794	558	608	676	639	717	980	1024	1038	1061	1116
955	Metabolite_955	13.37	163.939	TRUE	100.92856:33 143.9594:22 145.92758:16	1155	1342	1230	1248	1272	1184	1391	1428	1428	1225	1360	1490	1283	1270	1369	1456	957	1349	1241	1278	1434	1072	1197	1289	1511	1192	1638	1287	1481	1613	1383	1168	1431	1264	1339
956	Metabolite_956	13.49	163.941	TRUE	128.95259:41 130.96799:21 149.02763:21	1022	1459	1365	1148	1323	1342	1481	1141	1268	1240	1399	1516	1344	1153	1303	1562	1080	1323	1170	1218	1318	1349	1517	1718	1068	1223	1262	1556	1735	1401	1408	1170	1474	1668	1269
957	Metabolite_957	1.67	163.944	FALSE		425	507	314	341	346	591	550	483	505	530	197	219	240	295	295	639	478	744	561	694	699	464	709	669	608	660	908	905	616	634	467	459	542	448	345
958	Metabolite_958	0.65	163.942	TRUE	101.96482:18	931	780	831	725	1026	955	684	1243	1016	1023	714	831	1084	1062	737	879	779	1120	942	678	1081	729	727	820	655	986	959	805	1046	893	1192	757	952	796	828
959	Metabolite_959	0.49	163.946	FALSE		629	592	639	696	872	654	665	793	625	643	833	886	691	584	744	809	581	668	608	778	626	625	647	651	701	617	787	767	616	642	774	812	742	830	713
960	Metabolite_960	13.76	163.948	TRUE	145.93846:71	1175	1181	1066	1324	1234	1008	1280	1232	1160	1221	1178	1186	1234	860	1616	1535	988	1571	1165	1206	1487	1233	1015	1275	1182	1158	1344	1385	1197	1647	1322	1294	1445	1202	1148
961	Metabolite_961	13.62	163.945	TRUE	100.92865:16 100.93484:24 101.96868:65 118.95213:21 147.97986:26	1006	1475	1050	1389	1295	1080	1153	1310	1284	1263	1456	1493	1453	1059	1386	1453	972	1533	1219	1473	1709	1244	1231	1471	1391	1217	1402	1501	1627	1306	1324	1383	1692	1773	1096
962	Metabolite_962	13.98	163.949	TRUE	143.96321:17 144.93478:69	967	1464	1378	1492	1387	1175	1224	1464	1350	1152	1335	1547	1479	1287	1265	1390	1105	1383	1456	1462	1377	1307	1401	1241	1165	1402	1479	1382	1257	1579	1196	1311	1494	1431	1350
963	Metabolite_963	2.87	164.041	FALSE		1266	1043	920	791	995	2147	1425	672	694	690	336	156	138	196	173	109	104	115	73	83	124	101	154	97	106	66	81	92	62	97	121	161	143	128	163
964	Metabolite_964	3	164.041	FALSE		2841	3401	3048	2809	3132	5387	4532	4564	5401	5514	486	489	606	627	695	177	91	120	94	79	124	97	96	113	75	81	81	92	90	97	365	401	444	403	399
965	Metabolite_965	2.98	164.042	FALSE		2700	3401	3048	3205	3110	5387	4687	4564	4873	5514	486	489	606	627	695	177	91	120	94	79	124	97	96	113	71	81	81	92	90	97	365	401	444	403	399
966	Metabolite_966	0.78	164.074	FALSE		384	542	400	486	407	353	434	413	452	385	355	454	361	330	454	329	239	347	299	298	163	171	145	158	147	562	509	699	524	711	527	504	639	550	711
967	Metabolite_967	7.7	164.515	FALSE		243	469	486	477	272	304	848	414	522	309	550	523	512	105	427	870	391	678	437	635	608	343	357	657	438	360	607	343	589	422	219	260	550	491	287
968	Metabolite_968	8.93	165.045	FALSE		529	443	406	524	659	441	331	325	359	382	90	111	122	94	130	61	101	130	98	104	73	101	103	115	69	64	69	51	77	85	580	704	738	543	748
969	Metabolite_969	3	165.052	FALSE		1077	870	758	704	699	1077	1090	1127	1147	1031	327	406	411	328	243	270	289	286	290	306	576	640	702	381	530	207	162	129	241	124	351	284	351	461	554
970	Metabolite_970	2.47	165.056	TRUE	101.06352:24 120.08385:88 121.07277:19 123.05112:16	478	631	512	772	523	446	531	410	413	489	644	863	553	564	701	503	482	459	405	483	742	727	728	853	670	500	501	338	350	329	1261	1447	1147	1026	1422
971	Metabolite_971	1.66	165.055	TRUE	95.04667:16 100.93241:16 119.04462:32 119.04952:17 121.97195:16 123.04303:92 147.04262:21 165.06174:41	2107	2137	3524	3531	2467	1203	2846	2423	1937	2097	1675	1243	1579	1448	1464	1641	1090	2096	1403	1867	1203	1871	1532	1085	1661	1310	2339	2087	2009	1606	2249	1978	2291	1715	1892
972	Metabolite_972	2.7	165.055	FALSE		921	780	687	797	785	916	898	865	874	626	291	386	273	387	278	131	178	171	193	187	203	199	172	279	212	117	162	111	111	145	233	354	311	217	251
973	Metabolite_973	3.42	165.056	TRUE	119.07675:18 123.04456:105 147.04285:138 165.04665:18	3036	3078	1432	2697	1310	5430	2434	5075	5308	5009	1718	1118	1811	989	1685	249	337	287	315	399	704	710	718	672	723	195	159	141	172	149	1028	807	1216	963	1388
974	Metabolite_974	2.35	165.055	FALSE		717	825	692	707	764	537	515	571	590	566	852	970	833	838	873	423	413	327	308	386	385	432	443	601	474	266	241	213	227	274	1053	987	954	1027	1193
975	Metabolite_975	4.26	165.056	TRUE	65.03483:20 66.02696:27 91.05217:124 95.04797:31 119.04683:117 119.05439:33 123.03733:23 127.55453:35 139.17876:20 147.04227:582 149.05382:20 165.04869:20	10192	9902	9851	9440	9156	17906	15048	16567	17714	16107	1468	1649	1405	1699	1433	153	192	225	181	247	326	386	412	318	327	195	144	105	119	124	123	156	133	102	152
976	Metabolite_976	1.48	165.054	FALSE		835	584	555	619	660	495	409	521	475	599	355	238	266	576	427	1105	1268	1391	1200	698	1684	1928	1354	1083	1372	2386	1848	2369	2307	2479	525	478	476	479	462
977	Metabolite_977	1.82	165.056	TRUE	91.05308:37 95.05081:39 103.05564:22 119.04635:55 123.03324:16 123.04367:197 123.04868:55 124.04301:20 129.0177:18 147.03841:21	8652	9191	9080	8449	8714	5380	5264	5364	5769	5340	6761	6994	6933	6973	6405	15774	16308	16551	16882	16183	16686	17751	17194	19336	17245	25423	22961	21354	22390	25224	4510	4332	4263	4194	5689
978	Metabolite_978	3.14	165.056	TRUE	91.05965:17 117.04283:20 119.05614:46 123.72267:34 135.05254:38 147.0497:163 149.0675:23	2357	2329	2435	2663	2544	1433	1720	1637	1632	1779	882	737	813	925	775	843	971	802	1141	960	1826	1767	1673	1796	1984	324	238	351	314	414	1432	1631	1463	1434	1672
979	Metabolite_979	3.64	165.053	FALSE		843	925	671	689	530	784	717	768	771	748	204	252	211	269	200	313	225	208	202	178	176	246	221	202	200	142	91	116	135	113	248	174	190	168	234
980	Metabolite_980	10.87	165.055	FALSE		116	80	114	147	96	94	138	106	117	103	122	119	89	87	82	126	156	174	233	111	563	723	337	604	414	165	136	60	88	96	134	104	146	105	73
981	Metabolite_981	4.13	165.054	FALSE		6825	6641	5798	6272	5554	11818	10014	9614	10587	10114	611	694	707	757	670	116	133	188	138	138	144	197	184	158	158	138	100	147	106	89	317	365	306	288	491
982	Metabolite_982	0.99	165.055	FALSE		634	758	854	645	667	633	703	757	767	629	322	429	393	349	379	557	486	474	600	477	469	413	448	505	522	242	196	227	217	237	903	676	765	723	843
983	Metabolite_983	3.22	165.054	TRUE	91.0524:37 119.05151:17 133.06332:16 147.043:234 165.05391:20	2712	2724	3150	1354	2675	2365	2149	1981	2463	2131	822	967	718	881	833	850	881	770	1282	1159	1929	1825	1802	1281	2135	324	311	351	314	414	1014	1050	952	1090	1398
984	Metabolite_984	10.37	165.056	TRUE	147.05215:60	82	80	79	106	71	59	85	138	97	79	58	286	91	51	75	419	568	540	713	469	1314	1823	981	2299	1267	67	272	56	165	85	136	127	126	210	83
985	Metabolite_985	4.52	165.09	FALSE		679	725	641	704	528	283	209	292	277	266	310	226	213	379	205	254	208	164	182	176	237	236	217	250	248	116	137	95	126	145	208	118	206	146	170
986	Metabolite_986	3.18	165.093	FALSE		140	160	191	121	134	129	128	138	153	190	122	214	134	131	174	785	911	786	821	631	876	815	850	1031	835	366	308	290	342	377	236	207	150	288	260
987	Metabolite_987	3.45	165.091	FALSE		289	298	239	249	245	212	198	188	250	278	227	294	279	315	231	361	374	333	423	377	305	302	496	281	367	152	188	150	142	203	206	167	163	136	241
988	Metabolite_988	6.4	165.129	TRUE	91.04452:20 93.06682:17 105.05756:16 119.0839:16 124.95852:17 148.12221:22 165.13275:74	1771	2209	2202	2028	1948	622	698	693	557	582	648	684	650	735	610	60	93	65	102	150	93	83	123	109	93	111	40	75	62	52	970	857	675	688	1044
989	Metabolite_989	11.03	165.162	FALSE		358	205	261	287	250	215	221	212	220	178	302	225	462	405	348	228	209	149	153	195	201	239	219	219	151	262	130	185	271	155	233	248	229	189	263
990	Metabolite_990	12.82	165.984	FALSE		527	575	1582	1433	1562	1644	506	1615	1866	559	549	592	1688	1954	590	588	517	515	1781	1636	549	1670	579	2341	568	564	1628	1618	568	1750	513	607	2009	620	1599
991	Metabolite_991	12.93	165.985	TRUE	84.96391:34 86.94789:17 94.94922:24 108.96519:22 108.97105:22 124.9603:53 124.96734:15 125.97536:33 126.98367:18 128.20694:16	1439	1665	1601	1486	1565	1444	1502	1483	1600	1533	1562	1767	1327	1622	1389	1801	1299	1778	1647	1464	1716	1455	1583	1980	1665	1455	1549	1328	1760	1543	1588	1398	1960	1778	1549
992	Metabolite_992	0.89	166.053	FALSE		593	452	511	481	446	347	397	431	423	541	374	458	310	279	281	631	585	576	631	614	277	341	310	288	304	1065	1003	1105	913	1226	284	211	224	203	213
993	Metabolite_993	1.83	166.058	FALSE		1384	1411	1184	1003	1084	870	666	1036	901	974	857	901	902	991	750	2059	1745	2212	2053	1760	1993	2185	2038	2253	2142	3315	2844	2308	2908	3094	679	687	586	589	913
994	Metabolite_994	4.26	166.058	FALSE		1093	1065	997	1229	796	2294	1671	1767	2130	1882	301	264	224	339	255	119	66	109	111	126	87	117	94	163	103	73	45	68	65	88	42	57	61	59	63
995	Metabolite_995	3.42	166.06	FALSE		378	558	324	502	491	620	625	762	662	600	238	325	318	353	268	98	135	98	76	127	144	114	176	164	106	68	68	87	128	80	200	216	220	261	249
996	Metabolite_996	4.13	166.06	FALSE		1063	821	921	816	589	1109	1337	1378	1176	1197	255	290	201	154	287	202	104	121	111	126	209	85	110	133	159	113	88	68	79	88	171	167	92	96	110
997	Metabolite_997	2.35	166.088	TRUE	77.03796:17 91.04849:16 91.0563:16 93.06613:49 103.05505:219 107.04686:16 120.06376:37 120.08005:3667 121.08511:314 128.95399:16 131.04727:101 149.05853:136 166.07137:18 166.08682:349	50139	52576	49826	48899	45744	49986	47986	51021	54731	49745	55601	61173	54031	58899	53700	23333	21974	23668	22423	22261	36822	36863	36735	42157	37017	32901	31245	27084	31049	37670	38777	40751	36554	35665	51279
998	Metabolite_998	12.8	167.012	FALSE		746	723	753	753	747	746	566	649	786	675	744	752	717	725	694	756	683	714	821	719	769	678	777	851	822	871	800	757	698	693	620	648	789	812	784
999	Metabolite_999	0.87	167.025	FALSE		894	1490	1185	1028	1166	1150	1367	1343	1610	1547	1845	2081	2025	1810	1899	554	416	543	533	474	435	378	363	502	347	170	142	166	210	152	933	1031	943	1071	902
1000	Metabolite_1000	1.83	167.035	FALSE		1155	1240	1298	1235	1263	1760	1491	1456	1681	1624	1425	1414	1510	1386	1454	350	341	332	296	336	486	447	395	471	439	480	340	284	569	361	796	1068	774	716	1150
1001	Metabolite_1001	2.3	167.033	FALSE		261	274	295	329	331	406	285	391	393	436	340	513	464	395	356	1226	1390	1401	1480	1254	1686	2100	1814	1859	1714	571	488	428	659	495	401	508	382	376	453
1002	Metabolite_1002	11.7	167.034	TRUE	93.02805:16 149.02309:38	682	489	536	490	451	581	438	398	399	570	546	535	531	672	549	609	592	480	483	689	676	581	518	574	453	804	511	591	490	526	504	568	366	468	660
1003	Metabolite_1003	2.26	167.073	FALSE		5812	5996	5824	6004	4813	5874	5884	5790	5717	6060	6937	6672	6032	6625	6101	2930	2529	2902	2543	2694	4391	925	986	1063	3756	3831	3971	3389	3822	4422	4501	4496	4399	4148	5852
1004	Metabolite_1004	11.04	167.071	TRUE	91.05244:16 95.05135:16 105.07037:22 119.08838:18 121.0588:18 123.11457:16 124.06117:18 139.07234:37 139.08267:34 167.06845:688 167.08252:34 167.10681:17 167.11443:20 167.1225:16	12620	8793	7269	11733	14230	3460	3011	1930	3509	2939	314	558	1081	342	388	331	461	222	152	339	204	204	155	512	220	203	193	242	175	138	58929	54176	47305	50487	55342
1005	Metabolite_1005	11.19	167.07	TRUE	78.0516:16 91.85021:30 111.08397:18 121.06609:16 121.07504:17 122.07436:45 124.05425:137 124.1021:16 137.06541:18 139.01035:23 139.07501:27 139.08078:99 140.07487:44 167.07538:1428	5961	3554	2920	5158	6930	1721	1348	794	1583	1315	153	246	362	304	204	139	330	202	261	199	115	110	155	446	101	151	119	96	146	99	34556	33325	28045	29710	34932
1006	Metabolite_1006	2.53	167.072	FALSE		593	604	575	611	591	494	448	501	588	657	622	622	577	556	683	528	461	566	480	652	748	726	546	788	771	729	773	743	683	726	401	414	493	385	569
1007	Metabolite_1007	2.91	167.07	FALSE		443	705	470	389	345	317	297	297	356	245	222	326	257	266	211	679	589	702	562	659	746	688	565	710	731	727	779	679	572	718	321	251	298	248	370
1008	Metabolite_1008	10.33	167.072	FALSE		162	116	136	152	156	93	209	141	88	115	72	80	61	84	71	72	62	65	91	88	84	87	78	80	133	115	68	103	117	108	637	650	603	624	702
1009	Metabolite_1009	5.33	167.085	FALSE		211	157	157	144	224	190	156	279	227	210	145	135	185	176	182	365	453	381	547	408	647	811	824	805	727	287	215	255	222	250	274	250	176	206	247
1010	Metabolite_1010	2.34	167.089	FALSE		5777	6028	5825	6004	4791	5845	5851	5768	5770	6060	6914	6655	6015	6576	6101	2960	2794	2896	2570	2701	4342	4750	4667	5121	4439	3814	3955	3389	3822	4232	4463	4581	3937	4148	5819
1011	Metabolite_1011	11	167.106	FALSE		706	603	658	773	864	1075	797	746	1023	979	384	298	336	367	807	176	211	194	289	214	262	323	264	293	234	240	134	205	158	167	709	686	604	473	560
1012	Metabolite_1012	3.44	167.107	FALSE		804	861	726	814	772	691	759	654	709	647	110	185	183	184	104	285	294	311	299	304	238	306	204	249	238	248	197	266	179	183	231	210	180	194	219
1013	Metabolite_1013	3.87	167.106	FALSE		647	614	563	590	708	244	225	204	255	288	134	193	112	155	124	187	241	197	143	225	192	168	169	174	242	136	103	136	174	101	199	163	202	166	176
1014	Metabolite_1014	0.85	168.006	FALSE		419	490	518	396	496	500	481	492	601	557	771	776	624	631	659	272	187	230	268	176	186	156	160	186	190	52	60	57	71	91	155	222	167	152	162
1015	Metabolite_1015	0.85	168.051	FALSE		275	269	321	325	289	317	363	234	308	303	273	263	279	274	298	2167	2047	1730	1714	1889	936	2444	2151	1894	2185	407	389	496	563	670	667	624	510	623	812
1016	Metabolite_1016	0.95	168.067	TRUE	96.04865:41 121.03673:20 126.05885:23 138.06389:56	378	342	321	394	422	457	363	298	331	361	396	295	328	267	327	1762	1813	1768	1812	1808	1884	2114	1973	1875	1859	501	477	637	587	651	520	488	553	489	516
1017	Metabolite_1017	11.05	168.072	FALSE		1325	1122	881	1346	1557	452	356	242	362	293	121	118	100	91	98	79	107	99	83	84	90	71	140	152	95	77	108	83	85	190	6771	5779	4704	5433	6228
1018	Metabolite_1018	2.35	168.091	FALSE		599	571	745	648	637	706	738	689	887	624	820	890	661	758	705	479	384	526	451	383	614	572	485	700	553	509	481	448	492	590	611	519	506	681	759
1019	Metabolite_1019	1.25	169.012	FALSE		328	425	376	400	317	252	481	309	329	378	359	341	291	307	358	152	167	200	209	180	157	339	234	273	199	141	114	119	119	116	316	228	276	261	235
1020	Metabolite_1020	1.66	169.019	FALSE		758	788	896	1185	902	803	682	606	926	756	624	596	541	612	588	434	466	345	499	407	415	418	559	421	468	391	262	278	348	318	467	506	388	449	378
1021	Metabolite_1021	2.19	169.049	FALSE		844	1314	1124	1171	1033	617	667	784	1066	691	170	123	114	119	133	335	332	410	328	466	367	396	376	387	347	328	301	302	360	348	2186	1640	4339	4141	4984
1022	Metabolite_1022	4.02	169.049	FALSE		363	440	425	475	317	229	300	252	323	182	99	134	85	79	65	284	243	290	185	194	177	203	154	158	130	334	228	329	445	396	719	658	703	715	911
1023	Metabolite_1023	3.75	169.05	FALSE		821	827	769	914	607	340	398	348	460	301	95	111	232	97	86	169	142	164	146	156	174	164	147	235	214	163	166	158	203	173	877	499	1099	1019	1327
1024	Metabolite_1024	4.26	169.049	FALSE		107	119	117	107	122	140	119	156	82	84	63	87	85	76	59	232	146	144	129	150	181	172	176	207	332	173	181	175	132	139	712	517	683	482	741
1025	Metabolite_1025	4	169.049	FALSE		363	440	425	475	317	229	300	252	323	182	99	134	85	79	65	162	182	191	147	177	177	203	166	158	130	302	228	200	325	228	750	658	689	678	951
1026	Metabolite_1026	2.21	169.049	FALSE		1049	1304	1194	1255	953	790	582	712	804	527	170	123	124	119	133	335	332	410	380	466	367	396	376	398	347	328	301	302	360	348	2096	1451	3979	3791	4498
1027	Metabolite_1027	2.73	169.051	TRUE	112.9582:19 128.94357:27 144.08176:17 151.02901:17 151.03773:107 169.04456:19 169.05441:18	234	319	236	333	253	286	230	278	301	280	200	183	144	130	109	322	351	310	365	353	287	286	254	285	353	399	440	397	307	264	3150	2272	2569	2865	3185
1028	Metabolite_1028	2.44	169.051	TRUE	130.97159:33 133.03516:49 134.03377:18 152.96828:19 153.09366:20	295	347	308	327	256	178	242	205	228	160	282	248	246	358	318	1059	1348	1007	1166	1046	1561	1614	1598	1802	1626	645	589	635	589	676	359	320	443	327	541
1029	Metabolite_1029	12.78	169.097	FALSE		428	473	417	591	497	669	452	417	476	469	560	551	477	641	539	409	570	582	516	470	461	473	581	552	597	586	554	484	690	528	373	400	456	605	552
1030	Metabolite_1030	2.39	169.976	FALSE		483	370	325	390	368	378	392	409	394	674	328	294	321	365	338	401	374	418	386	357	377	459	472	385	357	434	419	399	518	380	305	309	309	410	373
1031	Metabolite_1031	13.2	169.98	FALSE		898	718	584	542	450	616	686	572	613	603	681	637	628	693	609	741	792	641	736	932	593	556	762	637	574	705	718	584	682	691	557	681	610	824	565
1032	Metabolite_1032	13.14	169.982	FALSE		872	718	538	542	537	612	645	538	614	609	612	665	567	703	557	687	774	684	734	844	614	544	802	637	574	705	800	615	703	671	582	679	569	690	565
1033	Metabolite_1033	2.4	170.027	FALSE		733	847	663	703	713	484	401	539	492	435	540	527	527	585	483	293	313	276	173	262	282	371	661	447	273	171	444	362	235	224	189	224	173	141	220
1034	Metabolite_1034	1.9	170.047	TRUE	86.09283:38 109.02374:16 125.00874:20 125.01906:17 127.04522:16 128.03281:41 128.04347:16 132.10144:29 142.02336:17 142.04778:138 153.01695:33 170.03467:18 170.04478:28	2929	3412	2936	3038	2686	2143	1847	2080	2398	2152	2774	2435	2229	2762	2483	3907	4072	3827	3901	3861	7615	7342	7300	8352	7397	1475	1344	1401	1490	1148	1933	1774	1709	1845	2305
1035	Metabolite_1035	2.44	170.057	FALSE		238	322	226	241	210	267	182	140	126	190	246	212	199	191	246	988	851	934	627	834	779	904	1002	896	1033	979	1038	992	1010	716	207	186	236	201	296
1036	Metabolite_1036	2.29	170.058	FALSE		242	331	240	233	183	177	154	156	195	142	155	137	176	134	128	786	792	654	790	808	616	641	730	738	637	403	304	291	305	283	362	379	485	464	621
1037	Metabolite_1037	1.77	170.081	FALSE		498	476	409	463	404	302	367	289	293	341	473	629	598	557	410	734	624	583	534	619	497	547	479	656	426	242	194	183	186	189	598	627	577	732	785
1038	Metabolite_1038	2.57	170.082	FALSE		543	531	599	556	473	357	270	271	312	282	481	567	678	574	511	114	229	309	216	239	286	330	228	354	249	302	379	316	311	237	105	124	154	163	97
1039	Metabolite_1039	2.05	170.081	FALSE		1253	1187	1247	1007	1235	972	837	665	1021	1025	921	868	907	961	865	289	414	417	381	332	233	348	300	245	259	105	113	109	153	110	846	862	940	828	1310
1040	Metabolite_1040	3.83	170.118	FALSE		445	419	373	432	414	153	215	145	201	106	390	215	137	214	153	1051	945	798	974	961	282	357	252	319	246	186	124	166	152	160	182	136	167	188	212
1041	Metabolite_1041	0.85	171.018	TRUE	130.04843:36 170.05206:16 171.00891:17	4699	6443	5523	6008	4999	1173	1351	1261	1453	1176	8531	8923	7697	6470	8281	1243	713	966	1029	1091	515	548	391	554	499	281	334	251	378	272	1326	1241	1499	1255	1268
1042	Metabolite_1042	1.82	171.032	TRUE	81.0331:23 87.05021:40 87.47099:17 109.02563:41 112.95897:20 125.02111:17 127.02876:19 127.03946:40 130.97043:23 139.00012:18 142.04507:19 153.01242:18 171.02817:25 171.04999:18	2220	14580	2255	16043	14635	3533	19467	4678	21661	6720	3422	3311	3767	3499	2813	1966	2064	1987	1929	1823	1402	935	1504	1796	1486	962	631	689	639	560	1120	6152	7073	7390	9415
1043	Metabolite_1043	3.28	171.029	TRUE	97.02657:17 109.02583:20 169.05389:16	1217	963	830	761	825	982	794	852	842	920	675	606	514	920	638	390	525	505	485	546	716	680	781	865	817	205	256	251	236	230	1002	1027	997	918	1533
1044	Metabolite_1044	2.05	171.031	TRUE	58.06369:30 60.0816:54 69.02983:16 69.07072:24 89.94293:17 97.05485:25 108.01778:20 125.02498:16 127.04533:35 153.01892:78 155.95883:22	13300	10853	970	9452	8869	8999	2639	880	8456	7725	17215	18813	16931	21211	15956	1272	1302	1115	858	1422	814	877	786	739	626	387	311	318	252	416	6459	5513	3913	4002	10926
1045	Metabolite_1045	1.92	171.031	TRUE	81.02942:21 96.0416:21 96.04858:20 97.02382:29 107.00886:16 107.01528:27 109.02915:21 109.03422:20 124.03847:17 125.01823:21 126.02925:16 127.03257:56 127.04204:17 128.95253:18 129.03784:16 142.04805:45 153.01552:136 154.01384:20 170.04126:48 171.01089:18	12825	14501	13155	15420	13812	21408	19385	21840	21698	20522	2789	3045	5009	6951	1143	1803	1982	1807	1687	1672	1343	938	1458	1708	1348	941	586	689	598	685	6553	6118	6697	6980	8972
1046	Metabolite_1046	2.29	171.03	TRUE	86.09014:20 107.01453:27 127.03838:32 128.95036:25 130.96808:37 153.01086:30 153.01596:60 154.02148:37 162.52953:21 171.02658:18	3407	3436	2893	2813	3012	2519	2393	2613	2681	2185	3932	2960	3714	4189	3589	1654	1852	1754	1716	1726	1671	1986	1739	2024	1701	373	332	284	307	254	2573	2742	2415	2110	3348
1047	Metabolite_1047	2.44	171.04	TRUE	89.93974:16 96.96096:16 112.96242:17 153.01817:21 170.03142:27	997	1010	1019	878	995	749	886	749	813	769	987	1141	1118	1139	1152	3284	3283	3383	3174	3288	4163	3691	3717	4503	3732	3226	3118	2579	2765	3159	1887	2182	1933	1583	2538
1048	Metabolite_1048	1.01	171.029	FALSE		1041	958	742	729	1257	1112	959	969	1136	1001	1024	1213	1282	759	1164	159	279	169	245	189	159	236	166	165	189	132	106	98	137	96	306	580	410	442	458
1049	Metabolite_1049	2.88	171.029	TRUE	71.93472:20 96.96465:20 97.42652:30 112.95902:21 112.99821:25 126.09801:16 130.97409:30 171.1582:24	1778	1591	1549	1608	1583	1496	1356	1363	1343	1453	866	786	848	917	749	205	268	299	265	229	295	266	349	453	313	178	170	153	150	165	697	511	482	520	722
1050	Metabolite_1050	3.48	171.029	FALSE		716	588	593	472	605	678	771	746	593	731	389	314	395	427	369	318	638	349	385	406	395	391	391	439	352	178	160	172	183	153	685	946	859	728	1244
1051	Metabolite_1051	1.22	171.034	TRUE	127.03436:20 153.01059:17 153.01971:39	683	578	661	749	767	999	708	833	867	893	363	279	301	285	328	197	185	214	150	181	147	171	127	142	180	101	124	126	148	103	451	676	370	332	546
1052	Metabolite_1052	5.17	171.067	FALSE		631	611	621	801	776	291	169	299	200	298	485	203	263	248	334	94	64	94	74	81	97	77	119	82	143	58	65	122	68	65	166	210	221	215	189
1053	Metabolite_1053	2.44	171.066	TRUE	89.93629:20 111.04238:40 129.05052:16 133.0249:18 139.03015:38 139.03804:132 139.0463:42 152.01654:22 171.06706:20	478	431	475	428	496	345	376	251	388	393	435	496	426	582	471	3005	3075	3108	3011	3092	3708	3597	3696	4287	3580	3226	2938	2500	2577	2940	1670	2086	1559	1485	2434
1054	Metabolite_1054	2.17	171.066	TRUE	107.04578:16 109.06019:20 127.03769:18 128.01111:17 130.966:33 139.97495:16 171.06967:17	662	689	883	647	790	469	592	546	621	541	289	309	233	239	195	290	258	177	260	255	165	254	183	320	157	207	124	142	136	132	2705	2257	2566	2510	3575
1055	Metabolite_1055	2.69	171.065	FALSE		156	109	128	131	149	105	129	107	155	171	97	121	154	131	131	291	295	286	394	303	214	249	241	227	175	667	508	650	601	796	157	239	165	175	202
1056	Metabolite_1056	3.7	171.136	FALSE		289	254	236	258	226	280	206	227	227	235	263	259	287	310	252	423	394	384	443	350	993	890	1117	1025	949	277	409	293	261	309	227	300	217	203	254
1057	Metabolite_1057	3.7	171.142	FALSE		291	270	231	258	226	267	206	227	227	251	263	258	238	269	224	423	379	384	443	350	965	952	793	1183	789	277	409	277	261	326	227	284	217	205	254
1058	Metabolite_1058	10.85	171.14	FALSE		648	612	662	759	896	919	546	688	695	730	460	625	720	759	726	609	595	580	793	533	560	560	706	634	520	646	576	860	686	473	738	597	704	613	606
1059	Metabolite_1059	6.49	171.151	TRUE	89.07358:22 131.00433:18 171.15152:48	1637	1960	1707	2200	2199	1685	1948	2009	2410	2382	724	652	803	616	637	683	772	723	820	727	336	466	312	384	347	290	252	341	298	339	839	783	977	997	917
1060	Metabolite_1060	5.17	171.151	TRUE	85.02818:21 89.06639:18 96.95612:17 171.14833:93	2489	1634	2514	2853	2796	2334	1904	2220	2361	2593	1120	981	901	1320	1128	956	1030	905	1169	944	655	758	613	780	712	654	357	403	542	443	1150	1324	1535	1433	1793
1061	Metabolite_1061	11.16	171.152	FALSE		981	930	851	775	903	971	690	939	866	759	797	797	703	962	799	939	770	807	756	867	854	1023	665	855	1086	999	796	870	653	660	895	741	969	840	780
1062	Metabolite_1062	11.05	171.152	FALSE		819	837	833	667	714	807	545	897	878	721	784	796	819	1132	683	957	694	851	698	901	933	937	942	837	934	884	896	783	735	725	875	703	960	834	782
1063	Metabolite_1063	13.19	171.996	TRUE	112.95589:126 130.96602:73 133.92311:23 156.96783:19	649	762	621	696	553	631	527	772	640	614	515	776	669	892	827	711	701	739	834	562	621	742	927	622	680	1006	790	625	732	824	571	626	626	575	800
1064	Metabolite_1064	13.13	171.996	FALSE		748	674	617	714	651	751	652	797	610	641	606	784	634	892	904	755	653	790	811	597	780	749	849	664	750	1116	899	625	775	853	614	626	567	592	851
1065	Metabolite_1065	0.86	172.014	FALSE		396	567	447	429	439	136	160	198	232	241	614	599	588	559	611	136	121	166	105	152	131	115	117	165	118	66	75	95	64	91	360	252	375	391	202
1066	Metabolite_1066	2.05	172.032	FALSE		1217	978	1142	1088	849	870	736	733	1016	728	1533	1982	1737	1916	1633	247	195	212	168	213	128	140	158	211	139	87	95	65	68	78	666	591	438	559	1168
1067	Metabolite_1067	1.92	172.031	FALSE		1276	1231	1246	1389	1285	1809	1563	1915	2072	1709	452	422	479	508	346	257	311	281	249	223	269	310	330	313	308	122	110	127	142	137	659	632	683	860	929
1068	Metabolite_1068	0.85	172.07	FALSE		426	519	409	668	662	325	298	309	256	337	183	212	197	210	183	239	177	207	270	200	134	138	172	170	155	133	148	122	90	137	308	220	234	253	295
1069	Metabolite_1069	3.71	172.095	FALSE		272	271	328	242	160	180	151	186	209	149	285	351	279	189	200	504	452	471	347	445	538	579	486	606	535	145	184	129	135	131	796	865	526	387	725
1070	Metabolite_1070	3.82	172.095	FALSE		300	271	328	242	160	225	153	137	194	152	391	351	279	285	259	519	476	481	599	522	616	579	615	708	535	145	184	163	180	183	712	758	541	418	835
1071	Metabolite_1071	7.85	172.171	TRUE	99.5881:21 172.17426:57	878	1427	1279	1547	554	873	1486	897	715	664	1035	1248	1834	650	665	2509	787	1332	813	646	1766	639	963	1033	1343	680	1044	914	1308	651	552	972	600	992	908
1072	Metabolite_1072	7.89	172.171	TRUE	57.069:26 84.04906:17 172.17982:85	1345	1537	1509	1482	694	1248	1961	1100	1040	877	1028	2042	1810	650	826	1781	1252	1310	1004	1508	1625	1151	1059	1501	1546	891	906	1065	1445	745	552	1065	894	681	1268
1073	Metabolite_1073	13.11	172.977	FALSE		720	644	478	636	564	397	1004	523	689	586	825	746	707	649	551	792	539	563	1034	855	972	451	1243	829	1159	620	689	508	1090	936	484	526	487	998	675
1074	Metabolite_1074	1.48	172.977	FALSE		277	246	310	352	276	278	489	370	336	387	239	216	233	261	210	675	498	583	548	590	743	639	691	550	576	600	544	478	604	763	310	286	485	455	387
1075	Metabolite_1075	0.99	172.978	FALSE		191	207	183	162	241	123	172	188	184	161	330	332	383	375	297	297	195	270	296	286	521	302	360	436	357	611	702	738	815	646	237	230	296	324	267
1076	Metabolite_1076	1.12	172.983	FALSE		258	344	268	338	291	237	288	309	267	281	328	459	383	258	297	480	391	651	450	583	612	459	575	593	518	927	1016	933	908	944	378	291	371	363	339
1077	Metabolite_1077	0.85	173.014	FALSE		466	588	511	587	453	586	466	609	494	446	850	1114	633	698	768	381	217	293	292	223	212	464	157	240	267	150	143	297	151	190	456	413	385	395	392
1078	Metabolite_1078	8.94	173.031	FALSE		594	680	615	588	1004	365	402	528	516	488	114	123	107	116	105	156	125	147	135	125	96	96	75	127	57	71	62	46	77	46	970	856	879	875	1102
1079	Metabolite_1079	0.99	173.046	TRUE	57.03878:30 83.04843:24 127.0457:30 130.08856:20 157.02682:16	437	580	423	484	451	702	530	653	693	552	325	339	292	333	307	1668	1446	1989	1945	1793	2247	2461	2292	2466	2366	7871	9056	8514	7375	8747	1002	931	631	856	928
1080	Metabolite_1080	1.15	173.044	FALSE		346	406	331	311	375	370	288	340	323	322	272	202	199	224	227	1042	868	1098	1029	952	937	1432	1337	1233	1132	2183	3178	2765	2058	3150	528	463	430	312	384
1081	Metabolite_1081	1.92	173.045	TRUE	83.05171:26 86.09409:123 132.10457:22	407	294	365	345	365	574	462	555	455	478	231	192	205	204	196	1434	999	1327	1260	1252	1700	1966	1801	1886	1512	1430	1823	1491	1649	1648	586	706	432	481	539
1082	Metabolite_1082	1.89	173.047	TRUE	94.97215:20 109.03127:43 143.04883:16 157.09029:18	407	294	365	345	365	574	442	533	439	479	231	192	205	204	196	1227	777	1168	1106	1123	1189	899	1239	1278	1921	2041	2037	1534	1491	1666	586	706	432	481	539
1083	Metabolite_1083	4.39	173.065	FALSE		367	293	278	266	290	322	249	232	304	234	333	476	307	390	322	902	925	883	1005	944	1079	1060	1301	1183	1083	441	210	218	309	202	531	498	432	471	470
1084	Metabolite_1084	2.44	173.129	TRUE	96.96723:16 112.95372:24 173.12389:59	567	510	550	425	381	190	120	149	160	161	1118	1143	1132	1079	1142	151	177	213	156	154	69	49	40	102	56	84	59	47	44	68	221	138	218	167	136
1085	Metabolite_1085	11.32	173.132	FALSE		361	120	110	139	203	177	126	183	427	165	207	257	264	192	826	354	172	275	442	235	230	273	511	407	190	140	147	241	219	154	431	364	591	669	328
1086	Metabolite_1086	10.64	174.03	FALSE		219	313	293	236	378	353	202	232	339	317	82	58	80	67	117	55	72	51	59	66	88	44	27	60	55	27	42	97	38	45	878	824	959	1032	542
1087	Metabolite_1087	8.99	174.032	TRUE	93.02919:23 98.95712:25 149.02272:16	1737	2061	1750	1880	2304	1214	1145	1238	1352	1334	230	149	295	262	361	132	189	160	134	162	133	146	54	289	81	150	44	70	91	47	3044	2764	3150	2951	2701
1088	Metabolite_1088	0.97	174.042	TRUE	84.04341:17 85.02745:16 100.03802:16 103.05554:22 126.94984:33 128.0298:17 128.04202:18 128.07022:25 128.11086:21 136.0593:24 174.03883:37 174.04863:16	1644	1801	1512	1844	1771	2768	1844	1485	1710	1637	1264	1241	1171	989	1351	2410	2765	2277	2317	2277	2541	2978	3252	3267	2955	987	1578	1554	844	1553	4823	3635	4178	4043	5085
1089	Metabolite_1089	3.89	174.075	FALSE		73	99	92	97	94	73	53	91	83	91	68	59	54	59	74	130	119	117	133	115	169	133	166	175	125	49	98	119	99	72	673	564	678	562	830
1090	Metabolite_1090	1.82	174.078	FALSE		350	551	317	345	361	264	300	326	326	267	226	246	205	212	223	120	169	112	178	165	138	213	148	117	92	75	90	64	66	74	306	278	380	322	353
1091	Metabolite_1091	0.99	174.122	TRUE	69.0288:17 85.06535:27 110.09667:26 134.05478:26 149.0238:16 174.0388:46 174.10939:24 174.12175:94	5342	5651	5234	5653	4891	2806	2838	2821	2876	2800	3098	3513	2840	3408	3106	1427	1305	1482	1532	2360	902	1058	924	934	905	1665	1645	1535	970	886	6318	6250	6014	6299	6473
1092	Metabolite_1092	1.3	174.114	TRUE	96.96299:20 112.01289:38 128.06885:19 130.08443:16 145.96155:17 149.01572:16 174.10834:23 174.1235:96	1480	1503	1332	1478	1343	985	878	782	974	1019	710	820	745	812	705	387	474	318	344	395	471	413	378	385	309	269	238	218	182	178	668	694	610	590	799
1093	Metabolite_1093	1.87	174.126	TRUE	68.99925:16 87.04137:44 99.61941:18 104.06998:16 135.05524:40 157.07777:16 159.07939:17 174.12177:464 174.13338:95	10365	10233	9841	10192	9451	4044	3932	3607	4123	3820	9185	10348	8932	9927	8650	1298	1277	1304	1335	1307	598	322	522	662	424	471	345	559	467	286	7946	7798	7344	6897	11488
1094	Metabolite_1094	1.05	174.13	TRUE	85.39461:24 129.02:75 130.03056:28 137.02618:20 140.0786:29 149.02708:23 174.03651:22 174.11861:79 174.12712:89	4509	5015	4280	4934	4129	1779	2079	2270	2209	2040	2592	3073	2205	2730	2608	1283	1273	1452	1600	1466	874	1042	911	880	887	950	909	834	988	905	4406	4396	4678	4702	4799
1095	Metabolite_1095	2.12	174.151	TRUE	59.07256:18 60.08045:51 69.06561:17 158.95543:16 172.52534:17 172.53627:16 174.14977:3707 174.1825:21 174.2236:47	60680	64465	61052	62105	58985	51837	46523	48484	53067	48977	52078	56304	52149	57263	50490	41088	41116	39181	43196	38427	49807	50216	49552	57730	47492	21400	18431	17559	17627	18082	77031	75500	72410	68426	97747
1096	Metabolite_1096	1.9	174.149	FALSE		11202	10456	2230	10206	1531	4023	3841	2855	4016	638	3367	10879	3983	6700	4261	1471	1353	1217	1356	1378	598	321	505	402	323	482	274	554	415	253	6711	7084	4544	6490	4169
1097	Metabolite_1097	2.21	174.149	FALSE		67575	71198	67331	68056	65116	57960	53566	53891	57716	54567	57475	61400	57656	61301	55078	49373	43984	43854	46856	42168	55173	3673	55160	64182	53093	23160	21197	19630	21405	20988	86610	83244	79613	74557	102907
1098	Metabolite_1098	12.78	174.15	FALSE		670	514	409	423	497	565	421	283	316	466	398	377	726	519	419	374	583	443	445	367	324	532	553	378	571	533	412	331	481	311	701	615	390	273	490
1099	Metabolite_1099	8.93	174.53	FALSE		581	544	580	624	785	512	362	429	368	410	90	89	102	88	117	112	103	52	111	88	60	67	54	105	49	59	37	20	25	36	618	803	989	517	863
1100	Metabolite_1100	0.91	174.895	TRUE	115.03316:17 122.94963:16 175.06424:24	1047	1207	1128	938	883	1120	1110	814	1204	770	2617	2856	2853	1476	2176	305	388	344	401	292	103	164	109	92	135	75	129	49	41	74	726	847	587	570	902
1101	Metabolite_1101	1.31	175.022	FALSE		865	787	727	838	610	590	527	551	587	686	1705	1881	883	1750	1715	320	336	310	370	359	307	359	312	376	360	188	166	201	160	193	657	649	581	409	636
1102	Metabolite_1102	1.67	175.025	TRUE	98.09341:18 111.01043:22 129.02243:104 138.99507:23 139.00447:160 157.01822:18 158.01259:25 159.00706:35	2099	1946	1972	2020	1847	623	585	631	558	753	3536	3069	3533	3530	3920	440	439	578	553	450	354	548	304	422	427	128	158	122	138	100	2508	2499	2753	2508	2585
1103	Metabolite_1103	1.49	175.026	TRUE	87.01229:16 96.9631:16 111.00488:53 111.01128:17 129.00606:20 129.01552:22 139.00177:176 139.30754:16 140.00648:25 149.02649:28 157.0041:39 174.1216:21	1830	1098	1160	804	807	542	618	436	603	497	1297	1404	1643	1259	1284	385	266	332	326	354	218	344	283	236	342	137	123	133	97	110	1475	1374	1766	1620	1500
1104	Metabolite_1104	8.94	175.028	FALSE		898	1003	1105	650	1025	760	750	638	773	570	143	98	151	131	156	95	141	107	145	89	69	80	64	90	96	61	39	60	35	47	1285	1299	1306	1237	914
1105	Metabolite_1105	0.98	175.039	FALSE		675	707	638	737	637	610	672	610	720	711	439	448	400	405	492	446	480	383	462	492	538	540	494	513	627	381	449	382	295	486	665	1029	721	1080	1147
1106	Metabolite_1106	4.48	175.076	FALSE		407	402	387	353	542	416	434	393	381	428	461	549	483	473	327	260	223	210	228	191	270	293	256	384	376	162	96	124	92	93	632	399	390	368	509
1107	Metabolite_1107	1.86	175.092	FALSE		559	664	603	557	567	601	496	1063	1110	721	472	656	503	608	582	406	422	359	403	585	289	348	264	394	418	283	313	317	318	305	1152	362	230	336	531
1108	Metabolite_1108	2.07	175.087	FALSE		1033	967	1021	890	865	1275	1180	1116	1147	1113	413	422	401	467	391	784	738	860	699	885	699	647	804	685	725	344	405	299	316	370	466	469	449	373	571
1109	Metabolite_1109	0.98	175.115	FALSE		1256	1733	1550	1715	1427	1627	1754	1720	2004	1702	953	936	917	1015	966	4014	1639	2122	4597	5091	2978	3664	2858	2941	2675	4757	23413	24496	4294	22499	845	672	879	876	868
1110	Metabolite_1110	11.45	175.111	FALSE		253	187	435	271	626	219	254	147	199	237	245	129	119	136	173	115	177	125	113	122	152	116	159	149	102	146	119	138	191	97	390	453	367	344	309
1111	Metabolite_1111	0.83	175.121	TRUE	70.0641:16 116.06216:17 116.07541:16 130.10318:18 158.09766:20 175.11827:123	6838	7487	6684	7299	6380	8170	7452	8772	8833	8067	1321	1569	1498	1658	1349	24576	26072	33041	25226	25108	16422	17102	17887	17300	16945	236947	209491	236082	237008	233644	1133	798	1036	1118	1146
1112	Metabolite_1112	1.87	175.125	FALSE		687	1183	1433	1439	1346	881	566	590	550	467	1294	1430	1123	1333	1122	276	216	278	314	214	141	125	137	150	122	343	367	339	228	317	1148	1026	777	730	1121
1113	Metabolite_1113	11.44	175.147	FALSE		325	268	467	558	605	403	282	265	329	364	318	135	202	139	233	188	210	200	302	179	337	592	518	593	148	130	139	209	140	117	779	911	745	765	573
1114	Metabolite_1114	12.12	175.149	FALSE		324	176	60	119	140	376	191	93	143	225	152	546	260	529	223	539	185	209	273	289	485	122	101	414	165	342	170	249	357	125	186	95	283	207	360
1115	Metabolite_1115	11.79	175.148	FALSE		315	179	147	164	243	472	191	178	171	430	176	121	214	112	254	210	138	105	207	154	144	138	100	175	91	90	106	110	100	113	1005	800	1082	1537	656
1116	Metabolite_1116	7.06	175.154	FALSE		728	482	571	445	450	492	412	548	626	535	678	639	511	545	705	613	532	625	686	524	475	598	529	754	558	722	452	561	438	492	664	540	607	643	559
1117	Metabolite_1117	3.73	175.147	FALSE		228	239	227	208	224	767	793	733	837	756	89	105	118	106	68	171	179	197	240	150	262	211	292	301	287	109	86	106	64	95	213	166	121	113	158
1118	Metabolite_1118	4.63	175.15	FALSE		208	348	217	169	141	421	245	285	326	301	151	185	139	176	98	599	659	756	704	599	419	357	332	361	322	366	195	242	304	254	303	459	282	358	393
1119	Metabolite_1119	2.09	175.156	FALSE		7325	7440	7344	7009	6871	6419	5622	5430	6579	6163	6125	6308	6495	6675	5986	5045	4702	4779	5042	4257	6476	6065	6573	6762	5759	2331	2134	2289	2195	1987	9198	9455	8283	8045	11019
1120	Metabolite_1120	0.8	175.357	FALSE		21	60	17	16	0	28	25	33	20	22	50	36	20	63	44	19	23	32	39	22	30	21	33	23	59	670	210	628	564	588	25	36	19	24	26
1121	Metabolite_1121	0.93	176.012	TRUE	72.93977:16 115.06145:35 132.01878:20 175.02901:16 176.09743:16	3464	3300	3315	3596	3124	1740	1472	1749	1847	1765	543	584	731	805	550	155	119	118	170	104	236	251	274	214	172	153	179	154	195	152	2062	1606	1663	1720	3152
1122	Metabolite_1122	0.97	176.093	FALSE		1052	1112	1051	967	935	1543	1517	1688	1810	742	510	634	500	478	524	358	418	356	530	448	393	314	353	401	341	887	845	1113	1258	717	875	823	580	578	1083
1123	Metabolite_1123	0.88	176.107	FALSE		825	1148	1080	886	819	1387	1392	1546	1718	685	741	612	697	569	610	2353	2298	3074	2387	2371	1557	1847	2143	1739	1578	2158	17073	18474	18754	19020	895	948	778	826	1206
1124	Metabolite_1124	0.97	176.128	FALSE		874	863	804	924	723	1451	1139	1394	1454	1274	339	334	321	303	332	537	608	607	562	535	388	470	471	669	368	2120	2337	3108	2810	2427	837	573	829	784	597
1125	Metabolite_1125	2.12	176.155	FALSE		854	679	877	808	816	537	636	592	630	527	632	800	592	617	490	471	570	456	661	495	783	851	590	907	755	265	228	238	253	201	794	910	764	616	1043
1126	Metabolite_1126	0.89	176.887	FALSE		256	298	266	164	204	315	233	176	262	225	635	676	538	527	501	78	92	120	97	99	71	48	31	55	79	34	45	43	47	54	196	323	117	189	244
1127	Metabolite_1127	2.89	177.014	FALSE		364	287	327	356	195	282	329	401	383	279	214	172	174	274	189	466	490	348	498	415	615	632	683	717	552	256	253	289	280	195	160	129	150	148	144
1128	Metabolite_1128	2.3	177.02	FALSE		357	329	342	341	373	390	335	389	485	498	285	377	368	303	422	1298	1222	943	1103	813	1506	1581	1287	976	1401	433	344	472	322	342	310	308	390	256	423
1129	Metabolite_1129	2.8	177.054	FALSE		929	1124	1140	1095	1093	601	609	650	652	620	1081	1108	1061	758	1169	1191	1287	1095	1153	1085	1189	1360	1180	1294	1395	476	513	398	609	375	3040	3114	2047	1941	2251
1130	Metabolite_1130	11.01	177.058	FALSE		719	696	671	690	696	796	507	611	718	766	853	743	818	763	1001	661	754	712	910	641	1017	856	874	941	859	799	735	850	775	770	708	700	720	776	748
1131	Metabolite_1131	2.64	177.054	FALSE		987	1264	1039	1197	1047	997	1162	1238	1221	1052	924	1013	924	859	948	900	893	936	917	934	689	908	723	991	896	709	551	546	566	625	913	861	691	784	720
1132	Metabolite_1132	4.84	177.056	TRUE	117.03389:49 117.12144:25 119.04915:44 137.96301:16 145.0323:74 149.01825:17 177.05289:93	471	445	557	494	476	409	484	405	453	503	440	492	522	457	415	871	1123	985	1059	806	661	624	535	673	578	491	509	641	451	560	2602	2463	2051	1828	2404
1133	Metabolite_1133	7.73	177.056	TRUE	65.03625:17 93.02947:20 94.03362:20 98.96127:16 121.02571:17 148.99268:16 149.02216:504 149.04263:16 151.02788:30 177.04576:24	6264	13689	9459	9066	5938	6538	15358	7079	6814	5497	9818	12765	16995	1579	6453	18321	7350	13448	11020	16763	10067	6853	7861	15098	8948	9616	16767	5110	12162	6651	3805	7931	8234	9420	10923
1134	Metabolite_1134	10.95	177.056	FALSE		868	746	824	742	1025	828	580	765	718	768	999	850	927	1017	1018	942	820	859	1076	728	1069	1045	1102	1287	1011	968	798	729	835	918	803	794	761	844	934
1135	Metabolite_1135	3.2	177.054	FALSE		1559	2256	1552	1695	1873	3060	3124	3005	3490	3086	864	1132	903	1086	861	1394	1253	1148	1096	1120	1313	1263	1201	1419	1331	2008	520	562	669	497	1048	1139	886	1043	1186
1136	Metabolite_1136	4.97	177.056	TRUE	76.23459:19 97.96718:17 145.02783:38 158.95872:16 177.0441:20 177.05382:25	503	557	509	573	485	444	460	428	451	533	555	499	543	527	574	970	881	804	988	800	575	655	634	553	517	581	382	499	510	527	1376	1641	1322	1037	1311
1137	Metabolite_1137	4.34	177.056	TRUE	87.99164:36 117.03112:22 137.96181:21 146.03548:33 147.03604:41 175.07758:16 177.05113:153 177.05931:80	7935	4415	4241	8838	8337	8883	4100	7922	4335	8305	2083	1515	2141	2183	1853	1119	1143	1157	1227	1117	1525	1060	1258	1109	1090	427	501	444	515	544	874	682	938	758	877
1138	Metabolite_1138	2.96	177.056	TRUE	78.04691:25 93.02733:16 96.9633:29 117.02801:18 118.03906:34 137.05965:20 140.96831:19 145.02823:132 149.02187:21 149.02753:17 158.96309:24 177.05385:76	5169	6409	6415	6064	5746	5658	5467	6646	6923	6554	1690	1651	1685	1637	1772	1738	1654	1624	1655	1424	1129	1295	1298	1379	1244	457	396	480	609	429	3244	3093	1856	2290	2560
1139	Metabolite_1139	3.74	177.055	TRUE	89.04466:16 117.03656:19 145.03181:84 149.02028:27	1608	2451	2353	1794	2168	2132	1718	2306	2306	2148	4345	4946	4383	4963	4282	3974	4112	3961	3964	3855	2537	2725	2854	3343	2740	567	487	544	549	507	1523	1287	954	1224	1164
1140	Metabolite_1140	4.43	177.055	TRUE	86.99323:32 89.03971:19 104.99217:33 104.99982:20 105.00652:31 117.03526:31 121.0291:21 137.96599:16 149.02644:17	5704	6449	6777	4084	3853	5548	6972	6076	6605	6795	1442	1605	1387	1594	1401	1109	1124	1211	1211	1066	1155	1084	1184	1235	1204	486	406	417	515	542	1001	789	955	835	927
1141	Metabolite_1141	3.48	177.056	TRUE	106.03426:22 106.04059:25 117.03321:17 118.0359:17 145.02711:97 146.02167:21	2270	11212	10132	11064	1873	11665	2266	2359	2790	10413	5973	6569	5777	6744	5743	6332	6874	5785	6209	5900	7882	8512	7947	8784	8450	1107	997	1041	1198	1049	2194	6453	6134	6631	7573
1142	Metabolite_1142	3.59	177.056	TRUE	63.01905:19 89.03311:17 89.04076:16 106.03085:47 117.02307:23 117.03417:132 145.02855:41 146.02609:27 149.06427:75 162.02756:17	11881	13659	12300	12346	11910	11643	11729	11258	12890	12132	6923	7663	6830	7491	6785	5794	4264	3762	3959	4122	4351	4679	4578	5408	4653	727	921	843	1156	1226	8713	8273	6784	7222	8255
1143	Metabolite_1143	3.06	177.055	TRUE	114.97441:16 117.03386:41 120.08101:17 145.02812:74 149.02556:23 177.04242:94 177.05234:16	3875	3742	4478	4232	3883	5391	5177	5535	5907	5598	2546	2672	2369	2525	2155	1763	1427	1729	1617	1456	1429	1365	1418	1433	1384	593	474	512	514	555	2419	2150	2017	1954	1879
1144	Metabolite_1144	2.3	177.056	FALSE		422	343	333	363	380	324	395	373	378	373	491	445	415	346	356	564	735	1155	570	562	913	1005	1343	1081	869	328	456	475	519	428	409	641	435	376	440
1145	Metabolite_1145	3.36	177.058	TRUE	74.06879:24 77.00756:62 96.96023:42 105.00414:19 106.99794:26 145.02408:17 149.01878:41 158.96014:20	3374	3265	3217	2844	2786	2310	1791	1659	1784	1802	4342	4818	4527	4803	3992	7069	7554	6153	6693	6383	8784	9134	9108	9588	9106	1976	1597	1785	1831	1395	1742	1940	2321	1607	2158
1146	Metabolite_1146	4.08	177.054	FALSE		1292	1152	1206	1074	984	825	774	1099	911	878	3084	3521	3075	3242	2703	1786	1795	1657	1758	1488	1393	1443	1488	1751	1472	494	527	447	529	530	1895	1374	1578	1480	1623
1147	Metabolite_1147	0.91	177.064	FALSE		1204	1573	1445	1704	1386	406	498	680	553	487	392	483	537	427	534	459	356	342	437	361	327	380	436	366	357	422	401	388	454	347	764	672	684	676	820
1148	Metabolite_1148	4.48	177.093	TRUE	117.06845:16 149.02768:81 150.06166:23 177.07152:17	304	317	422	413	267	487	505	470	473	478	482	410	472	517	452	3494	4002	3759	3946	4038	3213	3170	2912	3206	3435	478	297	522	438	399	868	1032	657	681	1288
1149	Metabolite_1149	0.8	177.123	FALSE		241	197	153	166	130	232	213	318	274	339	130	131	113	124	91	421	283	359	242	285	222	187	271	228	298	2110	1537	1870	1721	1854	120	85	59	74	70
1150	Metabolite_1150	4.81	177.127	FALSE		904	515	389	551	402	429	332	403	385	360	70	122	114	67	72	101	84	87	88	95	132	132	130	124	145	73	67	93	61	54	360	290	263	306	312
1151	Metabolite_1151	11.79	177.126	FALSE		243	156	104	132	227	276	186	118	91	349	97	88	267	140	211	164	95	150	178	133	110	115	90	82	123	96	138	97	69	68	1033	809	1028	1282	493
1152	Metabolite_1152	11.47	177.127	FALSE		202	156	260	331	395	453	202	158	217	351	125	86	138	94	161	141	97	128	160	100	96	107	152	206	105	159	117	104	82	127	416	454	398	388	358
1153	Metabolite_1153	11.45	177.164	FALSE		226	159	237	268	282	235	155	183	183	146	65	67	111	145	166	106	124	104	141	123	108	133	105	165	61	125	129	121	129	131	302	321	304	370	181
1154	Metabolite_1154	3.49	178.058	FALSE		1450	2086	1632	1564	1777	1384	1404	1644	1504	1615	968	1015	908	1013	1085	750	868	695	708	655	1136	1061	913	864	929	223	257	259	280	174	1274	1108	869	1022	1094
1155	Metabolite_1155	2.97	178.057	FALSE		663	785	1085	889	909	912	887	828	940	1030	415	486	337	387	417	356	246	230	288	371	220	190	319	265	273	135	143	134	140	149	452	424	427	352	580
1156	Metabolite_1156	3.59	178.058	FALSE		1414	1595	1578	1419	1737	852	1274	1351	1484	1581	962	898	867	1027	1085	652	826	713	962	716	1121	919	923	971	916	239	191	193	280	201	1241	915	852	1002	1094
1157	Metabolite_1157	4.31	178.057	FALSE		981	937	1258	944	1082	943	989	1244	1061	923	504	467	313	299	415	243	243	341	242	302	217	287	256	276	298	204	147	186	144	157	192	241	218	201	206
1158	Metabolite_1158	7.73	178.058	FALSE		622	1181	1084	933	645	940	1703	717	656	704	1030	1621	1728	397	662	1456	897	1481	803	1734	1357	674	996	1667	714	1054	2207	779	1498	699	560	945	861	784	1140
1159	Metabolite_1159	3.35	178.062	FALSE		477	410	486	429	385	322	279	309	419	410	541	629	463	618	551	886	798	733	821	755	1082	1133	875	1364	966	294	289	259	275	281	398	592	366	451	405
1160	Metabolite_1160	1.91	178.09	FALSE		787	939	766	711	763	702	679	897	721	822	670	760	597	719	573	509	479	523	617	437	537	553	537	543	455	160	120	136	141	181	201	186	238	183	255
1161	Metabolite_1161	11.44	178.133	FALSE		456	332	413	669	377	254	251	296	214	362	98	92	150	146	304	80	77	67	115	83	56	74	69	71	48	75	50	71	94	55	574	686	594	628	458
1162	Metabolite_1162	11.1	178.159	FALSE		334	353	441	530	563	429	406	428	435	583	110	70	87	72	99	115	109	81	103	77	96	113	68	94	115	79	62	80	56	111	4642	5020	3320	4509	2618
1163	Metabolite_1163	10.97	178.159	FALSE		120	119	91	152	122	104	138	151	98	141	58	101	87	83	78	115	109	107	78	66	82	89	84	72	91	68	61	80	78	79	707	666	519	598	501
1164	Metabolite_1164	12.79	178.992	TRUE	94.97306:18 98.96037:166 98.96825:16 99.93148:16 99.97025:17 100.97176:18 138.98416:16 139.88304:16 139.9863:229 140.95795:25 140.9984:49 141.99406:19	2342	2001	1997	1952	2008	2021	1662	1678	1544	1799	2071	1967	2065	2283	2170	2258	2234	2078	2257	2051	2170	2074	2155	1983	1995	2132	2001	2174	2196	2175	1936	2114	1896	2239	2339
1165	Metabolite_1165	2.99	179.035	FALSE		2135	1637	1314	1430	1474	2962	2176	2394	2293	2267	345	371	390	477	459	262	212	252	213	232	252	269	253	249	233	175	211	297	212	188	292	356	196	223	298
1166	Metabolite_1166	3.75	179.033	FALSE		653	586	749	574	643	820	738	658	727	827	132	122	180	221	201	119	128	141	140	129	176	161	170	136	120	141	76	75	128	113	146	115	88	101	152
1167	Metabolite_1167	1.55	179.055	FALSE		449	455	304	441	215	229	300	222	274	184	189	208	123	168	145	552	640	593	636	561	597	740	620	681	650	353	316	357	338	323	121	181	416	261	210
1168	Metabolite_1168	3.35	179.055	FALSE		385	297	387	312	335	305	343	333	378	299	288	369	341	409	384	468	719	533	507	585	813	732	730	744	832	259	224	233	226	251	7325	8087	6368	4433	8127
1169	Metabolite_1169	3.72	179.071	FALSE		470	425	460	504	381	525	380	443	418	445	174	231	181	320	274	439	565	473	363	393	393	396	364	431	418	443	381	432	402	381	1129	810	908	1009	1001
1170	Metabolite_1170	2.58	179.072	TRUE	76.01842:24 81.06745:18 94.03253:40 94.04156:111 105.07003:33 109.06435:109 110.06773:20 134.07445:32 135.08229:38 137.05879:1516 138.05576:16 138.06415:60 140.04402:20 179.06638:136 179.07521:160	24211	25197	24096	24102	22503	20910	19994	20450	21996	20251	9342	10731	9360	10873	9081	4089	4284	4088	3770	4069	2944	2750	2856	3482	2808	1471	1169	1075	1244	1231	28460	25922	25400	25242	36071
1171	Metabolite_1171	2.23	179.072	TRUE	55.93124:41 109.96508:24 119.05388:21 145.91734:17 146.03377:33 147.03799:49 179.07564:19	140	163	143	131	127	202	179	197	202	141	123	187	148	199	154	1394	1578	1268	1433	1377	2252	2370	2148	2708	2164	828	794	722	781	924	277	365	299	384	344
1172	Metabolite_1172	3.89	179.072	TRUE	105.03255:22 105.03995:31 111.97701:21 135.08284:33 177.04179:29 179.0825:20	1509	1678	1446	1401	1339	939	854	805	875	855	2173	2443	2170	2118	2068	2009	1919	1778	1753	1411	2652	3001	2992	3445	2182	651	615	503	627	679	1452	1784	1188	960	1851
1173	Metabolite_1173	2.06	179.074	FALSE		140	172	127	150	127	156	225	231	186	218	161	210	166	180	193	718	723	671	767	797	607	725	659	918	734	768	522	545	569	528	198	155	147	180	218
1174	Metabolite_1174	3.37	179.072	TRUE	91.01611:16 147.04137:33 161.04988:23 179.06703:111	296	237	326	292	302	222	280	219	243	299	304	369	301	403	358	460	674	559	514	541	806	742	727	905	791	275	198	210	208	251	6329	7347	5804	4220	7343
1175	Metabolite_1175	3.85	179.108	FALSE		188	130	135	135	119	124	142	112	218	136	271	322	323	282	282	662	658	697	629	707	449	395	490	438	326	374	430	307	381	339	193	175	197	142	263
1176	Metabolite_1176	3.24	179.125	FALSE		87	88	120	83	93	71	111	105	77	89	79	85	89	140	79	218	138	111	167	200	94	130	1198	119	98	262	81	85	64	106	70	123	62	84	139
1177	Metabolite_1177	11.03	179.181	FALSE		259	218	293	190	256	175	125	180	225	185	291	227	316	375	354	149	166	130	153	170	220	363	274	531	243	261	139	184	188	116	896	753	684	912	535
1178	Metabolite_1178	12.78	179.998	FALSE		944	817	822	1248	945	700	839	836	866	740	1031	1031	984	1156	978	1261	993	881	1181	1052	1130	984	1215	1005	808	1009	811	1088	937	904	983	912	1158	1006	1023
1179	Metabolite_1179	9.41	180.04	FALSE		250	306	330	261	587	246	285	338	284	293	145	149	81	62	89	93	71	117	98	62	68	37	47	92	74	45	59	64	85	54	553	639	838	605	593
1180	Metabolite_1180	2.58	180.075	FALSE		2936	3134	3089	2947	3015	2796	2507	2853	2807	2730	1181	1566	1178	1556	1074	845	601	610	592	582	415	416	411	658	396	348	345	229	357	362	3590	3020	3337	2786	4501
1181	Metabolite_1181	3.38	180.074	FALSE		90	182	119	140	136	93	123	81	89	121	121	131	130	105	116	213	166	178	169	137	153	206	208	252	161	121	81	100	105	96	1074	692	768	538	895
1182	Metabolite_1182	3.23	180.1	FALSE		98	64	110	81	120	75	100	112	118	84	122	110	118	76	141	488	455	464	459	653	590	459	550	571	419	290	130	117	123	168	107	142	100	71	127
1183	Metabolite_1183	3.06	180.102	FALSE		244	246	207	211	173	271	228	187	219	212	158	89	95	101	96	265	466	306	379	324	186	187	287	124	264	162	130	151	158	145	404	694	229	231	307
1184	Metabolite_1184	12.78	180.967	FALSE		711	814	762	834	717	612	623	722	697	784	836	783	829	917	809	858	788	827	844	742	807	762	896	994	720	862	828	810	944	869	798	763	890	843	994
1185	Metabolite_1185	1.83	181.015	FALSE		1226	1447	1367	1256	1237	1669	1656	1681	1805	1604	1471	1486	1465	1613	1446	268	179	169	279	242	263	318	233	340	332	124	127	98	87	109	944	1203	914	836	1089
1186	Metabolite_1186	9.42	181.039	TRUE	93.97774:28 138.96873:20 139.99492:24	1056	1197	1025	1140	1549	1017	806	998	924	1062	180	227	206	140	216	184	166	179	166	203	115	102	89	209	140	109	108	104	84	92	2678	2571	2497	3030	2029
1187	Metabolite_1187	7.14	181.046	FALSE		140	113	101	80	108	109	101	130	336	465	155	417	95	73	57	324	105	270	83	135	529	116	61	159	548	92	91	257	111	91	122	101	75	362	83
1188	Metabolite_1188	10.88	181.05	TRUE	67.00869:18 105.06892:16 112.9444:21 121.02492:58 121.43654:97 140.99908:27 163.03989:136 179.06451:17 180.06787:47 181.05173:120 181.05994:73	1465	1999	987	1789	2266	1436	1723	1282	1811	1536	264	297	1508	201	440	684	1929	498	606	668	294	219	208	1138	246	138	97	105	124	85	18378	20487	16902	17517	15701
1189	Metabolite_1189	11.5	181.05	TRUE	181.05659:35	547	298	329	387	481	466	281	196	373	275	76	136	261	111	114	190	216	252	189	193	95	96	124	234	96	66	56	81	55	120	2273	2564	1818	2217	2023
1190	Metabolite_1190	2.11	181.051	TRUE	166.05554:16 179.06915:16 181.04575:42	2581	2776	2830	2435	2322	1410	1257	1177	1505	1328	6000	6500	6496	6445	6013	2486	2670	2200	2702	2421	3186	3082	2776	3132	2701	492	543	453	435	573	1352	1540	1275	1091	2013
1191	Metabolite_1191	7.78	181.051	TRUE	85.02722:20 107.05395:33 121.02571:16 137.96471:17 139.97887:19 139.98611:40 140.95639:27 141.98102:21 181.05377:92	1624	1852	1847	2037	2217	1219	1258	1286	1554	1328	634	544	671	261	429	913	500	579	580	741	500	502	410	813	524	488	765	290	474	258	45424	47651	41101	45724	37864
1192	Metabolite_1192	3.67	181.051	TRUE	145.0258:20 146.03282:22 163.03806:145	3150	3349	3434	3317	3085	4248	3905	3839	4189	4086	153	126	174	144	158	152	143	293	140	146	158	202	152	197	242	194	149	219	134	177	78	94	110	82	105
1193	Metabolite_1193	11	181.049	FALSE		2065	1739	1316	1774	3019	1382	1099	875	1450	1191	222	179	581	172	327	277	668	275	298	324	294	219	208	508	210	144	105	97	155	97	16971	13830	8546	10166	8523
1194	Metabolite_1194	9.86	181.051	TRUE	68.99714:47 98.96335:50 100.95261:16 116.13557:20 121.03393:35 122.03823:36 140.99582:19 141.98428:20 143.96181:18 154.08438:27 163.03833:172 166.05347:17 180.46622:17 181.04701:378	298	340	197	334	423	324	305	294	359	411	95	164	185	91	141	148	262	234	197	182	150	269	182	234	253	79	57	90	83	62	12870	15844	9785	12518	6633
1195	Metabolite_1195	2.49	181.052	TRUE	89.03596:17 107.0501:22 112.07487:19 135.03748:20 139.04015:16 147.04776:23 163.03981:40	561	502	378	574	472	466	386	417	359	402	257	247	266	309	197	736	844	712	921	871	1834	1973	1525	1645	1887	205	336	242	196	303	451	451	517	496	615
1196	Metabolite_1196	2.98	181.052	TRUE	125.10487:19 137.06528:18 141.96484:20 179.0336:26	1504	1372	1289	1166	1008	2258	1975	1648	2644	1893	669	730	584	718	766	2547	2640	2311	2481	2044	3723	3685	4053	3894	3830	1417	1186	1169	1301	1398	389	338	306	317	453
1197	Metabolite_1197	11.39	181.048	FALSE		262	173	128	96	179	198	132	145	200	134	76	73	94	65	97	59	219	141	95	87	72	96	115	91	86	66	55	87	55	78	621	1840	1028	1024	834
1198	Metabolite_1198	2.89	181.051	FALSE		1876	1388	1238	1364	1085	2568	2006	1959	1957	1893	592	630	584	665	696	2292	2560	2195	2577	2137	3585	4046	4058	4208	4011	1359	1145	1095	1323	1235	389	338	306	317	453
1199	Metabolite_1199	10.27	181.052	FALSE		100	185	194	118	89	133	118	121	178	175	189	132	160	79	64	117	164	227	87	179	102	131	114	157	124	96	98	110	195	93	588	573	508	709	587
1200	Metabolite_1200	7.53	181.058	FALSE		85	613	130	103	173	87	99	97	307	274	110	274	707	78	87	421	668	113	78	146	129	102	91	613	120	107	114	108	96	93	103	122	86	99	82
1201	Metabolite_1201	7.32	181.058	FALSE		81	171	101	137	117	125	115	122	538	494	95	643	113	81	93	543	147	171	80	135	524	139	91	137	407	106	92	89	101	98	94	103	103	132	107
1202	Metabolite_1202	9.7	181.053	TRUE	86.94789:18 99.98119:17 107.05269:25 141.0015:38 145.03018:21 163.04805:20 181.05484:21	69	131	86	143	156	98	103	182	137	87	104	161	119	88	136	280	441	458	546	373	639	803	526	849	578	89	132	102	129	75	402	297	1118	359	1126
1203	Metabolite_1203	0.86	181.071	FALSE		365	323	373	380	350	517	687	506	566	543	339	437	407	416	347	424	421	532	525	434	401	498	571	533	517	341	458	234	334	240	1704	1618	2011	1974	2014
1204	Metabolite_1204	10.99	181.12	FALSE		6381	15143	14717	16524	19930	27953	10669	10095	13185	10670	1818	1930	4823	2716	1874	872	1585	1048	1137	1627	911	1630	1568	2956	2607	873	605	480	693	319	10378	10434	7172	8020	6826
1205	Metabolite_1205	2.59	181.087	TRUE	80.05746:20 97.96752:26 107.04575:16 109.06159:23 121.06249:20 137.06474:43 138.05437:16 141.95573:18 181.08827:25	567	459	396	460	466	447	382	427	469	356	262	235	252	276	280	346	340	258	364	301	921	1038	978	1123	925	1019	984	854	702	546	503	451	484	473	645
1206	Metabolite_1206	3.59	181.122	TRUE	105.06886:16 123.08172:16	124	107	106	184	107	143	104	114	149	151	171	232	306	213	181	1058	941	803	947	809	512	593	461	701	565	806	725	662	726	796	210	229	229	220	317
1207	Metabolite_1207	4.94	181.124	FALSE		133	127	112	130	134	92	131	142	161	130	127	168	109	122	147	235	217	161	181	235	244	205	215	275	215	121	125	141	93	106	1008	957	865	940	1317
1208	Metabolite_1208	6.95	181.122	FALSE		387	380	274	293	286	704	600	612	445	545	167	223	223	213	181	235	152	132	174	154	204	259	277	340	233	153	105	157	102	175	168	175	223	220	225
1209	Metabolite_1209	11.13	181.123	FALSE		15902	5864	1628	1566	7428	3686	3001	2992	29172	11610	1998	1907	4715	2711	4761	849	1603	1763	1222	1607	1274	2445	1199	2116	1794	890	605	480	693	319	1349	9500	4654	4661	1198
1210	Metabolite_1210	11.53	181.122	FALSE		868	603	613	685	862	1166	1000	1063	1325	1101	682	347	795	584	941	311	424	302	697	392	303	772	387	656	566	260	317	175	232	155	1283	1111	1104	1318	874
1211	Metabolite_1211	11.05	181.124	TRUE	81.0325:44 83.05281:22 91.05782:45 97.05482:43 97.06313:56 97.06889:32 103.05148:17 107.04889:19 107.085:25 121.09885:48 123.07954:20 125.05701:78 126.05813:18 145.0993:36 163.03362:18 163.09927:46 163.11276:150 181.11882:136 181.13133:68	858	15196	14543	16019	20417	27360	23956	22619	28584	25437	3859	1663	4751	2914	4825	872	2087	1464	1774	1751	1496	3267	1347	3007	2419	940	605	463	693	319	13995	5407	11562	11737	10796
1212	Metabolite_1212	11.48	181.122	FALSE		1043	807	912	922	1074	1858	1504	1580	2182	1654	673	331	795	563	792	311	424	302	697	392	320	756	387	639	566	260	317	181	232	155	1380	1094	1532	1280	839
1213	Metabolite_1213	4.04	181.123	FALSE		429	640	662	600	656	930	799	1210	1204	1185	274	289	353	384	340	1055	1032	878	1009	1237	658	736	749	771	614	519	467	340	387	592	295	364	220	210	241
1214	Metabolite_1214	11.38	181.122	FALSE		947	775	691	905	897	1541	1243	1380	1697	1327	566	347	602	647	736	296	424	269	697	322	302	752	369	656	407	260	167	181	161	190	1190	1343	1085	1070	1155
1215	Metabolite_1215	3.5	181.124	TRUE	97.96926:37 139.95963:33 139.98456:16 180.05165:17	124	114	107	95	107	140	117	114	149	151	171	232	306	177	181	1004	1034	980	978	907	512	593	514	701	535	865	835	681	779	788	210	229	229	220	317
1216	Metabolite_1216	4.13	181.124	FALSE		359	697	853	588	739	1114	896	1315	1051	1479	274	289	353	384	340	1077	945	955	1016	1083	681	736	749	820	614	519	467	340	387	592	295	364	220	210	241
1217	Metabolite_1217	5.95	181.123	FALSE		339	383	402	415	310	391	618	417	322	321	348	496	364	330	387	598	422	329	358	313	404	256	606	416	416	439	548	340	310	382	480	470	612	599	639
1218	Metabolite_1218	8.83	181.128	FALSE		276	460	541	588	703	293	317	707	503	432	165	201	126	157	161	125	129	109	75	127	135	216	148	153	121	106	97	89	77	107	183	124	146	138	129
1219	Metabolite_1219	7.14	181.133	FALSE		619	560	583	545	440	443	445	566	508	381	327	393	327	373	302	204	143	172	146	183	147	115	193	128	197	199	153	144	148	173	239	176	213	186	184
1220	Metabolite_1220	9.41	181.539	FALSE		330	411	288	341	404	352	255	298	305	350	99	41	85	87	104	70	53	76	72	90	46	62	48	58	56	44	60	50	33	42	701	579	880	559	681
1221	Metabolite_1221	0.83	181.963	TRUE	124.99418:30 181.96132:31	4150	4769	5336	4629	4501	6326	6921	6557	7366	6776	1711	1906	1874	1737	1706	694	560	653	716	672	608	614	480	668	514	45	78	50	62	138	2175	2279	1954	1879	2070
1222	Metabolite_1222	12.8	181.99	FALSE		1761	858	1597	851	1649	1545	1521	1520	1527	1509	1712	1693	942	905	1572	1054	1553	1135	1627	1643	1642	1578	1684	1222	1731	894	1140	1018	1586	1644	1644	1524	1696	909	1828
1223	Metabolite_1223	12.78	182.021	FALSE		859	610	712	608	700	749	971	837	743	590	630	700	764	570	651	650	530	714	1084	808	751	862	460	755	990	792	748	530	661	570	830	560	642	609	560
1224	Metabolite_1224	9.42	182.036	FALSE		557	690	489	607	760	479	446	526	585	536	142	123	118	136	129	108	140	87	105	102	98	87	66	161	78	107	106	72	109	81	1343	1094	1093	1020	914
1225	Metabolite_1225	9.84	182.051	FALSE		73	93	72	94	112	70	102	108	113	128	58	119	76	90	74	93	71	84	69	91	91	103	71	122	64	55	60	67	79	73	1711	2236	1370	1382	672
1226	Metabolite_1226	2	182.066	FALSE		1059	1310	937	1054	984	677	748	835	868	669	882	818	890	984	699	1343	1085	1454	1395	1549	1815	1585	1496	1980	1544	2139	2045	2309	2208	2327	668	500	633	487	561
1227	Metabolite_1227	10.89	182.054	FALSE		224	368	164	232	330	192	201	165	259	203	74	107	199	66	97	123	255	116	98	171	61	64	73	259	102	58	64	75	55	75	2026	2289	1814	1963	1700
1228	Metabolite_1228	10.99	182.052	FALSE		314	276	212	336	514	219	179	165	181	241	76	107	119	69	119	70	189	116	98	109	82	112	92	129	61	67	106	67	39	66	1929	1939	1830	1784	1510
1229	Metabolite_1229	7.76	182.053	FALSE		336	542	391	447	390	235	411	292	335	241	270	390	342	87	196	394	216	300	253	303	277	203	270	360	240	187	403	200	272	217	4905	5221	3156	4993	4318
1230	Metabolite_1230	1.61	182.082	TRUE	95.04474:28 97.97385:18 143.94218:16 147.03911:21 165.05647:43 182.07933:16	1476	1398	1323	1435	1576	1153	900	1034	1188	1066	730	1106	1076	1804	1309	2642	1590	2277	1824	2187	1488	1650	1511	1918	1523	1963	1599	1482	1499	1375	939	932	865	1146	1317
1231	Metabolite_1231	1.83	182.083	TRUE	91.05512:97 103.2708:25 109.06541:20 119.03366:24 119.03941:32 119.04832:117 123.03329:18 123.04325:120 124.04765:17 136.05632:18 136.07506:656 137.08089:33 138.08171:18 139.95412:30 147.04137:78 165.05469:306 166.99071:16 180.99684:16 181.01901:16 182.07748:231	17351	19073	19088	18473	17144	11897	11125	11966	12637	12049	14088	16097	14133	15712	13541	23697	21913	23804	23910	22719	26062	26391	25589	31593	25968	32935	29116	28065	29729	32891	8982	8353	8559	7558	11385
1232	Metabolite_1232	1.49	182.081	FALSE		1086	1104	1244	917	554	921	635	829	854	770	456	524	330	571	445	1653	1888	816	1624	2079	2042	1990	2223	2235	2115	3334	2195	1943	2283	2816	884	823	818	872	852
1233	Metabolite_1233	11.03	182.127	FALSE		2290	2175	1802	2071	1046	3351	2997	2948	3770	3674	609	295	936	446	666	214	327	253	241	329	261	431	314	412	451	211	150	131	174	99	1339	1600	1150	1050	872
1234	Metabolite_1234	4.16	182.191	TRUE	117.03078:16 182.18608:163	1086	941	833	952	1003	1243	1085	984	1356	988	1187	1298	1162	1527	1405	1132	1103	1090	1345	1087	531	495	757	694	496	606	489	447	537	412	617	651	790	675	868
1235	Metabolite_1235	7.73	182.956	FALSE		422	295	324	320	293	254	290	319	324	300	362	488	329	331	308	337	464	314	300	357	273	312	273	340	275	403	450	369	363	334	256	384	543	857	326
1236	Metabolite_1236	0.72	182.964	TRUE	108.96187:57 111.97184:16 126.97743:18 127.0273:49 138.96159:17 138.97186:44 139.97159:17 182.95857:115	14180	13054	13138	11514	12192	12627	9809	10474	11185	11009	25182	23113	24080	27580	25266	6056	8069	6466	6622	6247	5227	6381	5836	6309	5797	1511	1096	1102	1109	1094	17537	16536	13567	13692	16143
1237	Metabolite_1237	12.79	182.963	TRUE	98.96023:136 99.93406:18 99.96241:44 99.97048:140 100.9563:27 100.97318:16 102.94855:50 113.93638:25 114.95503:18 114.97975:20 115.96362:21 125.96636:18 136.07254:18 137.96962:27 139.98656:156 140.95215:19 140.95985:23 140.99297:58 141.00806:35 141.98373:161 141.99368:15 142.96629:62 142.99594:36 143.95909:174 143.98152:18 144.95992:23	9523	8821	8272	8348	8548	7776	7377	7228	7659	7356	9380	9953	9460	10596	9542	10068	8544	9488	9443	9178	10000	8304	10412	9287	8915	9923	9006	9529	9826	9892	9637	8574	10136	10106	12591
1238	Metabolite_1238	12.08	182.983	FALSE		42	54	58	37	78	41	89	53	40	61	78	88	72	44	72	78	65	64	67	43	93	58	72	113	60	86	83	77	44	58	56	65	78	63	451
1239	Metabolite_1239	13	182.987	TRUE	96.97443:20 97.96822:160 98.95892:18 99.96626:31 100.9315:17 100.93983:23 100.95409:16 126.97555:20 140.95238:37 141.95958:241 166.05852:41 182.99599:16	6962	7888	7034	7043	6765	6981	7141	7247	7523	7272	6778	8023	6503	7017	6826	7803	6319	7387	6947	7077	8466	6896	7214	9016	7398	7114	7288	7345	7452	5409	6710	6324	8720	7921	8437
1240	Metabolite_1240	11.17	182.989	TRUE	97.97314:36 111.05576:17 182.0367:19	102	92	103	107	108	135	74	157	101	119	97	125	120	91	75	126	103	82	112	102	208	99	104	121	142	162	108	147	123	88	141	89	153	175	134
1241	Metabolite_1241	11.81	182.988	TRUE	97.96972:40 103.96295:24 139.99207:25 141.94955:16 141.96402:104	76	61	47	77	25	64	51	88	55	65	52	60	63	76	77	86	43	42	54	45	74	48	48	85	60	55	43	69	79	54	62	80	69	59	162
1242	Metabolite_1242	11.16	182.989	TRUE	97.97314:36 111.05576:17 182.0367:19	102	92	103	107	108	135	74	157	101	119	97	125	120	91	75	126	103	82	112	108	208	99	187	233	142	162	108	147	123	88	141	89	153	175	134
1243	Metabolite_1243	11.94	182.988	TRUE	97.9702:77 138.99582:16 141.97908:16	42	49	50	77	71	64	73	47	55	61	78	63	54	44	57	47	43	48	50	95	93	75	56	72	60	51	38	80	79	47	62	80	71	76	264
1244	Metabolite_1244	11.41	182.985	TRUE	97.96475:29 100.95089:38 103.95523:57 125.09431:24 139.05704:18 141.8795:19 141.99406:21 142.12576:16 183.09634:16	65	96	60	72	70	63	81	82	84	44	97	77	78	86	89	74	42	89	57	57	97	78	90	79	68	105	55	66	82	82	63	56	77	89	73
1245	Metabolite_1245	12.89	182.985	FALSE		5840	5494	4836	4614	4773	5567	4661	4805	6529	4743	4811	6546	5129	5783	6896	6268	4480	5054	4767	4635	6253	5841	5863	6448	5154	5752	5419	5048	6356	4543	5537	5198	8510	6884	8867
1246	Metabolite_1246	11.56	182.987	TRUE	97.96073:24 97.9662:21 103.95004:26 103.95556:19 141.95496:16 141.96465:30 144.98138:95 148.60658:17 183.0574:16	61	39	46	48	94	53	60	46	88	57	57	81	78	84	88	56	49	77	74	41	64	68	83	72	73	54	55	76	49	68	63	50	71	48	77
1247	Metabolite_1247	12.79	182.987	TRUE	97.96457:25 97.97668:20 141.95927:40	6494	9578	4460	4799	7292	7877	4087	6377	4676	4491	4913	9019	4316	6773	9210	7414	8422	6548	4633	6264	6450	6839	11225	7543	7993	9190	9419	9487	9960	6568	7305	7587	10808	7106	9626
1248	Metabolite_1248	2.3	183.027	FALSE		144	201	221	152	218	231	173	181	245	240	236	323	215	202	150	562	603	471	596	488	722	672	629	639	648	306	251	200	298	200	218	269	211	165	345
1249	Metabolite_1249	7.26	183.039	FALSE		177	276	190	255	274	294	192	210	139	258	40	96	61	95	51	116	72	74	61	116	53	64	84	75	82	71	61	126	46	58	231	210	80	106	73
1250	Metabolite_1250	0.86	183.049	FALSE		259	256	349	156	241	318	276	225	278	338	560	577	644	599	692	406	258	281	373	315	260	233	287	196	190	204	268	145	175	126	521	545	532	553	630
1251	Metabolite_1251	7.79	183.052	FALSE		130	211	118	105	132	99	124	122	107	95	99	124	168	61	66	142	109	139	85	177	95	99	75	108	117	107	161	104	99	103	979	1106	943	1111	998
1252	Metabolite_1252	7.74	183.055	FALSE		130	232	96	105	132	98	124	122	107	95	85	138	119	61	66	142	106	186	85	177	95	99	75	78	117	107	143	104	99	96	857	714	826	1111	998
1253	Metabolite_1253	2.46	183.063	FALSE		386	441	462	335	358	363	392	233	258	363	139	113	172	113	146	269	197	197	192	251	197	229	167	204	218	188	177	142	125	142	900	588	622	658	603
1254	Metabolite_1254	3.39	183.066	FALSE		208	225	302	235	186	256	185	261	185	319	123	118	127	141	100	262	228	210	291	177	296	239	290	381	352	238	122	134	113	229	1203	594	1005	1046	972
1255	Metabolite_1255	4.64	183.064	FALSE		255	116	106	150	118	157	167	150	114	139	94	80	88	119	123	192	235	290	271	235	278	310	237	284	247	148	113	137	150	215	1130	845	1193	1052	1245
1256	Metabolite_1256	4.22	183.066	FALSE		151	189	297	243	322	145	114	168	127	153	191	263	171	162	180	313	422	379	474	553	519	482	541	921	501	218	194	234	188	218	205	271	233	219	345
1257	Metabolite_1257	8.37	183.082	TRUE	89.50268:19 103.05349:20 105.03336:117 106.03519:28 143.95546:16 183.08377:16	1756	2388	2502	1871	2159	1737	1814	2384	2903	2127	2279	2869	2041	1859	2314	2607	1635	2268	2468	1971	2111	1804	1941	2506	2223	1989	2097	1889	3595	2183	2140	2257	2407	2511	2315
1258	Metabolite_1258	0.9	183.085	FALSE		135	120	150	184	104	181	177	142	143	151	169	137	116	111	116	713	545	651	720	530	347	371	372	451	382	139	152	149	165	160	378	232	237	230	267
1259	Metabolite_1259	1.83	183.084	FALSE		1962	2204	2381	2276	2089	1465	1562	1557	1684	1467	1901	2006	2016	1877	1637	2847	2476	3140	3441	2644	3495	3311	3548	3676	2956	3685	3389	3180	3247	3664	1170	1061	1129	1062	1395
1260	Metabolite_1260	1.47	183.085	FALSE		221	227	239	127	193	167	159	133	176	196	73	106	92	90	77	355	404	366	342	353	536	419	439	557	385	605	483	444	477	503	182	180	183	170	144
1261	Metabolite_1261	1.84	183.085	FALSE		1962	2190	2381	2276	2077	1465	1635	1743	1684	1568	1784	2022	1726	1877	1637	2847	2476	3140	3441	2644	3495	3337	3548	3462	2865	3685	3436	3230	3247	3691	1356	1061	1254	1062	1395
1262	Metabolite_1262	1.7	183.086	FALSE		1255	1107	944	1001	1046	610	587	613	807	680	722	921	795	873	695	1146	895	1064	828	1157	1101	1242	1128	1365	1197	1519	1235	1378	1374	1460	468	539	480	431	757
1263	Metabolite_1263	3.88	183.187	TRUE	74.09232:24 101.10193:21 101.11012:30 183.1736:17 183.18358:95 183.20726:20	3630	3635	3264	4205	3915	4155	3275	3238	3106	3050	3732	3680	3553	4208	3282	2813	2727	2403	2928	2321	678	607	688	616	597	802	538	860	864	774	2143	2066	2472	2213	2942
1264	Metabolite_1264	7.99	183.192	FALSE		471	649	732	738	822	616	557	732	780	646	209	236	166	173	233	175	226	182	315	220	79	108	111	118	85	92	102	120	112	112	400	458	380	459	291
1265	Metabolite_1265	0.83	183.959	FALSE		3784	3858	3893	3151	3672	1110	1059	2575	3097	3060	8516	7652	7223	8087	7566	1479	1955	1313	1560	1610	1344	1430	1726	1235	1318	168	228	157	229	295	4547	5186	3836	3778	4799
1266	Metabolite_1266	0.72	183.963	FALSE		3864	3881	4398	3605	3461	3861	3065	3171	3801	3173	8516	7652	7152	8087	7444	1945	2487	1966	2261	2182	1625	1840	1768	2336	2100	614	418	469	463	485	5299	5186	4850	3945	5109
1267	Metabolite_1267	12.81	183.967	FALSE		1553	1530	1688	1583	1531	1565	1407	1331	1208	1485	1701	1774	1839	1910	1918	1670	1521	1751	1793	1546	2003	1439	1891	1705	1653	1655	1726	1881	1712	2045	1675	1480	1881	1898	2144
1268	Metabolite_1268	12.97	183.988	FALSE		817	1180	830	711	736	877	884	668	991	717	765	851	897	878	954	871	718	818	771	788	933	828	787	1071	757	712	771	830	907	955	948	801	854	907	848
1269	Metabolite_1269	12.79	183.995	FALSE		580	600	628	506	408	686	469	703	535	659	623	706	664	545	481	724	562	613	572	657	704	559	677	865	444	637	520	645	562	519	549	573	1006	759	907
1270	Metabolite_1270	0.96	184.073	FALSE		7997	7850	7674	7775	7156	6721	5727	5670	7341	6215	9015	9581	8234	11583	8720	19884	22077	19200	21313	1245	14009	14733	14310	17098	14953	8200	7438	7283	7803	7505	14155	13464	13550	13130	15409
1271	Metabolite_1271	0.87	184.075	TRUE	60.07979:22 86.09147:53 98.98373:19 124.99989:37 184.05949:24 184.07634:199	8170	7900	7407	7805	6940	6670	5594	5503	6405	5862	8926	9289	8330	11423	8561	20478	22028	19510	20432	19646	13822	14637	14244	16558	14636	8087	7301	6901	7514	7344	14367	13254	13655	13714	15279
1272	Metabolite_1272	3.29	184.075	FALSE		96	112	118	141	138	155	80	129	125	109	147	166	135	188	122	1405	1366	1437	1338	1225	996	915	1081	1088	850	3566	2650	3167	3025	3039	210	133	218	224	160
1273	Metabolite_1273	3.93	184.075	FALSE		105	123	134	98	96	105	81	86	107	88	79	116	99	182	90	632	601	650	731	672	482	495	740	518	460	1299	1252	1306	1393	1485	130	85	85	110	134
1274	Metabolite_1274	8.36	184.091	FALSE		411	461	436	483	419	371	415	577	554	487	619	560	359	453	441	545	364	520	513	359	458	404	515	425	461	409	531	388	623	542	536	508	487	442	460
1275	Metabolite_1275	2.5	184.098	TRUE	124.07403:40 130.08595:17 141.95229:18 142.08781:78 144.92375:27 184.07922:23 184.09998:40	1352	1294	1248	1272	1216	1064	758	891	967	868	937	1021	941	1040	926	427	504	530	435	498	305	317	351	479	399	162	147	226	153	130	758	776	812	612	867
1276	Metabolite_1276	3.88	184.189	FALSE		705	782	555	764	595	541	571	610	535	496	556	617	581	640	543	448	546	451	654	547	126	109	183	158	116	174	128	138	244	160	413	509	511	404	538
1277	Metabolite_1277	0.72	184.962	TRUE	110.01289:24 140.97473:44	4810	4442	4310	3658	4138	4021	3231	3217	3628	4303	8239	7931	9269	8174	8263	1936	2751	2170	2313	2101	1819	2193	1972	2049	1991	685	535	578	588	537	5327	5207	4473	4505	4907
1278	Metabolite_1278	10.62	184.986	FALSE		784	654	925	1128	686	752	765	1007	741	987	846	935	830	881	889	907	842	1114	792	885	779	807	840	876	1124	725	820	718	684	836	919	880	1225	1067	1126
1279	Metabolite_1279	8.93	184.983	FALSE		966	1093	1161	1062	1232	920	881	864	1066	907	641	945	669	643	705	738	748	792	692	707	868	749	887	710	843	687	693	1007	761	767	1090	1123	1325	1332	1550
1280	Metabolite_1280	12.8	184.988	TRUE	98.96129:44 99.95592:18 99.96981:272 100.97465:16 101.95995:16 101.96565:35 101.97143:24 117.96606:20 141.98387:16 142.98538:16 143.55835:17 143.96103:105 143.96721:31 143.9856:35 145.94647:21 145.95345:49 145.97621:24 146.95709:16 147.06247:26 147.93358:19	25029	30824	27619	32087	31023	30303	27509	28103	29950	29326	29251	35320	27728	33297	29263	32801	22207	30708	32014	32008	33818	31684	26747	34885	32851	33860	30590	30610	33062	31692	30405	29784	35002	33737	27946
1281	Metabolite_1281	12.97	184.986	FALSE		5980	5788	5422	5552	6380	2209	2451	6669	5756	5077	4980	6024	5579	6086	5726	5983	5316	5579	5422	5420	6035	5729	6677	6389	5741	6032	5299	5276	5153	5564	5955	6262	7215	6067	6860
1282	Metabolite_1282	9.41	184.988	TRUE	86.09687:21 99.97089:17 143.96054:25 144.99146:22 185.04747:34	1073	990	725	819	1062	910	780	899	877	721	830	789	682	810	817	714	693	975	840	929	939	836	848	893	849	822	693	692	778	737	997	1120	1623	1174	1369
1283	Metabolite_1283	10.52	184.99	TRUE	99.96821:16 100.95901:17 129.89336:16	859	724	932	1062	810	758	910	960	817	845	910	912	709	710	835	749	883	893	806	773	743	708	893	1032	906	774	803	679	775	948	722	681	791	760	845
1284	Metabolite_1284	10.18	184.993	TRUE	94.90686:36 102.9723:17 141.97394:28	873	887	882	873	972	904	870	890	1091	831	1029	1113	760	860	802	1092	827	1080	953	1207	984	929	756	1088	836	826	963	843	1518	1038	886	886	1040	989	1022
1285	Metabolite_1285	0.86	185.035	TRUE	87.06146:23 98.98242:20 124.99339:44 125.00322:35 184.07259:128 185.02623:19 185.03601:50 185.09557:26	6812	10193	9385	8592	8363	7230	9487	9736	11123	9756	15084	15999	14670	11514	14538	3680	2629	3517	3565	3443	2308	2526	1866	2773	2323	329	303	367	301	289	1371	1480	2610	2358	1336
1286	Metabolite_1286	3.3	185.046	TRUE	123.04384:41 126.02672:17 153.02074:113	1862	1384	1735	1322	2451	1458	1039	1162	1079	1783	545	403	690	913	656	408	632	337	441	378	185	399	272	449	378	250	237	270	212	232	518	725	188	298	298
1287	Metabolite_1287	0.87	185.073	FALSE		841	771	678	760	610	719	619	544	575	515	763	767	720	991	846	1559	1643	1497	1687	1841	1174	1185	1224	1165	1171	698	709	701	641	634	1104	1011	1284	1170	1375
1288	Metabolite_1288	3.93	185.082	TRUE	101.10539:16 110.03072:16 140.04411:25 145.93446:23 153.05516:25 183.19331:16 184.06497:38 184.18892:19 185.06351:20 185.07843:83	78	99	92	88	86	81	63	62	77	79	60	108	60	65	63	1978	1998	2152	2041	1989	1750	1615	1792	1718	1593	3504	3416	3609	3558	3594	131	101	100	101	109
1289	Metabolite_1289	3.77	185.08	FALSE		87	84	75	78	63	72	78	106	110	57	53	121	85	80	69	268	237	261	249	352	208	216	177	232	221	457	378	439	388	417	50	111	133	71	109
1290	Metabolite_1290	3.29	185.083	TRUE	107.01211:46 110.03745:21 125.02592:20 125.06498:17 126.03236:44 140.04236:23 141.04245:16 153.011:20 153.01746:20 153.05519:176 154.05437:17 154.06339:39 169.04741:57 170.05725:17 184.06956:24 185.04807:17 185.08125:63 185.11481:16	202	153	88	107	87	129	128	104	108	88	123	103	114	180	127	4570	4730	4862	5029	4438	2885	3065	3159	3466	2769	12209	10184	11521	11646	11356	229	177	128	116	135
1291	Metabolite_1291	4.76	185.114	FALSE		563	480	482	511	515	429	444	601	626	581	453	566	557	377	344	464	464	471	404	374	345	398	506	527	344	402	396	503	395	384	404	293	525	428	446
1292	Metabolite_1292	12.59	185.118	TRUE	103.9588:51 144.98647:48 147.93694:102 176.47551:17 183.07747:18 185.1344:16	838	596	604	584	676	805	640	564	669	726	658	695	819	846	758	758	880	710	769	672	736	654	833	712	547	812	597	822	702	710	711	600	702	613	913
1293	Metabolite_1293	0.73	185.961	FALSE		773	762	888	676	875	757	648	616	612	662	1348	1250	1342	1605	1402	503	509	619	510	445	367	475	391	509	371	162	129	109	119	119	1123	770	921	1018	1125
1294	Metabolite_1294	12.8	185.988	FALSE		2596	2646	3044	3486	2858	2705	3240	3011	2843	2719	3517	3779	3020	3088	3266	3413	2761	3409	3078	2789	3629	3002	2996	3345	3544	3079	3490	3018	3050	3282	2801	2448	3248	3083	3344
1295	Metabolite_1295	0.87	186.024	FALSE		600	688	872	766	739	781	620	574	715	1038	1098	1140	710	618	684	374	416	282	312	394	381	363	274	345	423	90	109	101	101	111	870	783	771	776	839
1296	Metabolite_1296	0.95	186.078	TRUE	83.0162:23 86.10181:24 111.01325:20 127.05582:17 138.05984:110 138.06665:37 141.10474:17 142.09099:16 168.06923:38 185.08849:24 186.07806:22	415	500	484	386	428	346	371	344	519	410	394	451	424	419	430	3724	3611	3521	3927	3846	4010	4214	4137	4521	3881	904	765	821	896	988	683	694	551	615	759
1297	Metabolite_1297	3.28	186.081	FALSE		98	113	82	86	150	151	145	115	96	109	130	128	95	85	61	539	610	653	584	592	425	452	540	598	425	1479	1199	1429	1151	1401	75	74	69	65	168
1298	Metabolite_1298	3.29	186.084	FALSE		69	113	78	86	150	151	72	115	93	79	130	128	95	84	50	539	610	703	584	592	425	452	540	558	425	1479	1171	1429	1170	1401	75	74	69	65	168
1299	Metabolite_1299	5.43	186.952	FALSE		505	494	534	447	549	531	483	598	512	414	609	1378	623	605	634	505	580	515	791	600	555	568	472	557	565	627	594	562	604	615	495	561	475	598	511
1300	Metabolite_1300	2.79	186.958	TRUE	98.01986:39 98.95177:17 100.93:23 100.96915:22 144.92311:20	677	947	791	1180	802	1006	1025	1091	945	877	877	901	899	1046	925	1256	1243	1215	1397	1512	1577	863	1277	1447	1378	1522	1309	1198	1158	1401	892	1145	976	791	1079
1301	Metabolite_1301	13.15	186.956	FALSE		2606	3358	3486	2991	3110	2911	3088	2897	3457	3397	3161	3600	3119	2628	3324	3161	3003	3244	3146	3754	3114	2528	2854	3124	2874	2964	3617	3687	3480	3622	2991	2585	3097	2567	2730
1302	Metabolite_1302	3.16	186.956	FALSE		757	782	762	748	698	863	900	1140	1029	786	924	771	732	847	878	861	703	855	943	815	869	604	560	671	663	815	776	839	1202	867	530	519	532	588	450
1303	Metabolite_1303	1.77	186.958	FALSE		527	621	739	611	813	629	720	926	815	632	556	501	472	379	465	854	712	756	1065	874	1074	1008	840	1068	928	874	955	943	869	1005	698	798	797	921	554
1304	Metabolite_1304	13.26	186.959	TRUE	96.96074:16 100.95602:18 145.92754:98 145.93535:18 145.95935:19	1679	2436	2903	2003	2120	1686	2100	2321	2302	2106	2486	2697	2243	1760	2586	2315	1773	4038	2095	2433	2319	2391	2184	2312	2085	2082	2724	2122	2418	2431	2446	2066	2261	2033	1896
1305	Metabolite_1305	13.33	186.961	TRUE	96.96838:16 101.96388:16 134.89476:30 141.95166:20 145.92139:83 151.93588:24	1631	2084	2321	1534	1641	1525	1881	2200	1835	1541	1604	2238	1813	1750	2329	1894	1879	1849	1793	1959	1781	1730	2050	2794	1614	1992	1865	2192	2051	2010	1777	1438	1837	1802	1666
1306	Metabolite_1306	0.64	186.959	TRUE	101.93451:24	1002	1375	1522	1276	1417	1269	1138	1403	1356	1290	1389	1331	1256	1318	1391	1300	1083	1207	1419	1403	1442	1162	1030	1410	1225	1256	1307	1170	1267	1269	1692	1375	1464	1463	1289
1307	Metabolite_1307	1.99	186.957	FALSE		694	818	836	1016	795	1156	1035	1120	1205	918	729	833	710	621	729	1169	959	855	1116	921	1298	984	914	1276	1060	1168	1167	985	1328	1085	854	801	949	953	842
1308	Metabolite_1308	0.75	186.957	FALSE		1050	1540	1399	1412	1505	1210	1301	1801	1499	1550	1700	1560	742	727	1243	1570	973	1407	1343	1386	1408	1195	1225	1507	1228	1199	1401	1303	777	857	1755	1726	1666	1570	1533
1309	Metabolite_1309	4.28	186.958	FALSE		478	600	669	539	585	471	440	570	375	503	468	796	530	520	787	619	593	853	480	637	754	582	692	693	604	850	1003	779	761	1013	404	286	544	505	479
1310	Metabolite_1310	2.39	186.957	FALSE		809	926	817	780	1153	933	958	1178	1275	985	933	1069	1002	915	913	1345	1052	1326	1332	1172	1357	1107	1055	1273	1162	1242	1051	1226	845	1229	958	876	933	916	869
1311	Metabolite_1311	1.3	186.956	FALSE		361	481	553	538	449	432	598	569	559	520	370	351	468	270	350	760	521	714	583	687	755	573	533	649	622	529	740	751	764	567	574	648	561	575	471
1312	Metabolite_1312	2.97	186.956	FALSE		760	830	818	835	781	1186	871	1032	890	787	685	805	710	743	1037	1080	819	953	811	989	1192	826	717	879	846	1127	1137	1337	1036	1234	1128	995	940	883	866
1313	Metabolite_1313	1.44	186.961	FALSE		362	506	487	521	433	460	696	703	607	622	351	433	303	311	335	556	550	598	973	663	756	678	654	1012	760	851	955	1018	824	1244	513	519	421	500	389
1314	Metabolite_1314	2.63	186.964	FALSE		676	706	935	679	942	893	954	822	883	984	818	792	706	930	707	938	821	950	1082	838	1033	810	806	816	993	1030	1139	936	1008	1348	882	675	848	965	820
1315	Metabolite_1315	2.48	186.962	TRUE	100.93298:25 101.94475:22 145.93947:37	881	828	634	800	827	766	954	909	825	1050	837	814	832	727	786	959	801	814	904	807	1081	851	793	819	872	972	1100	983	833	1009	975	876	871	876	825
1316	Metabolite_1316	13.44	186.966	TRUE	100.93904:25 114.97527:16 145.93611:97	1798	2013	2411	1928	2334	2040	1826	2565	1970	1983	2279	2810	2607	2094	2396	2464	1955	2408	2286	2607	1987	2055	1531	3441	1701	1936	2299	3232	2392	2628	2338	1899	2218	2093	2040
1317	Metabolite_1317	2.17	186.959	FALSE		884	915	814	873	861	898	902	975	1075	869	1032	959	722	636	921	972	1006	1183	1063	1118	1375	828	855	1269	858	1019	1043	1116	878	1041	817	811	722	846	731
1318	Metabolite_1318	12.8	186.983	TRUE	98.97096:17 100.93488:25 100.96582:21 101.97011:24 144.99388:16 145.96121:17	12643	12583	11131	12913	12258	12282	12266	10620	10716	11977	11723	14189	11065	13292	11906	13950	8491	11990	12845	11152	13794	12244	13853	12408	12509	10933	12093	12831	12651	12543	10416	12470	14364	13962	14746
1319	Metabolite_1319	12.9	186.983	FALSE		12733	11809	13117	12885	12386	12551	12046	11527	11513	11872	13740	13737	12387	2190	12454	13756	12171	13127	13132	13559	14355	11930	13391	13382	12501	13986	13487	12801	13158	13363	12430	12709	14379	14735	14253
1320	Metabolite_1320	9.98	186.989	FALSE		520	592	531	629	523	566	555	725	574	467	600	542	568	536	503	736	547	597	496	586	635	525	483	502	689	572	600	625	524	499	524	532	576	513	528
1321	Metabolite_1321	10.39	186.992	FALSE		462	497	655	629	415	484	601	431	511	474	823	526	581	443	607	642	590	842	754	523	540	476	447	499	862	584	735	568	562	633	720	531	458	642	649
1322	Metabolite_1322	0.85	187.032	FALSE		526	810	1104	878	847	709	832	981	935	1153	1240	1357	1161	1073	1177	342	248	303	391	403	259	332	179	330	255	171	230	214	151	304	219	252	262	225	327
1323	Metabolite_1323	4.29	187.059	FALSE		192	225	220	195	178	170	197	204	208	143	282	283	195	315	235	184	178	132	246	202	191	201	166	181	179	145	111	127	129	156	656	764	440	358	479
1324	Metabolite_1324	0.97	187.063	FALSE		193	295	192	271	196	193	256	241	217	274	244	263	240	184	248	1001	565	887	596	611	1085	986	1038	1092	675	1568	1811	1583	1510	1700	254	416	387	353	237
1325	Metabolite_1325	5.42	187.113	FALSE		384	444	555	496	355	318	288	305	355	316	1155	671	696	1136	527	190	296	250	242	397	181	222	147	155	182	133	97	140	99	148	221	211	172	176	280
1326	Metabolite_1326	0.96	187.11	FALSE		588	594	538	671	604	413	381	453	391	421	484	605	492	468	463	505	802	924	904	876	423	324	357	366	299	409	373	459	394	474	510	677	437	485	718
1327	Metabolite_1327	4.3	187.123	FALSE		243	243	228	276	211	305	255	237	215	258	168	144	153	135	184	336	584	512	498	487	307	215	172	171	140	323	191	237	187	201	262	251	181	169	250
1328	Metabolite_1328	1.64	187.947	FALSE		464	624	515	484	638	526	442	567	475	550	539	521	510	468	636	635	559	487	499	561	547	414	425	509	525	311	344	362	392	330	472	472	543	481	561
1329	Metabolite_1329	1.45	187.944	FALSE		472	489	470	490	516	542	359	515	385	457	414	551	537	600	547	296	394	390	357	404	277	286	377	335	417	252	294	337	261	256	575	557	609	691	611
1330	Metabolite_1330	12.83	187.992	FALSE		1770	1953	1828	1880	1731	1490	1596	1786	1625	1658	1877	1881	2028	1805	1992	1886	1510	2223	1689	1997	2078	1566	1742	2026	1749	1752	1950	1842	1823	2207	1607	1683	2237	1876	1911
1331	Metabolite_1331	2.4	188.039	TRUE	106.04568:28 129.01695:17 152.02037:32 170.02138:85 170.0298:208 171.0285:16 172.02303:23 172.14023:21 176.04248:16 188.03641:53 188.04782:18	4543	4760	4959	4457	4125	3800	3170	3014	3576	2953	3905	4317	3674	4306	3629	570	777	594	616	548	364	269	224	352	288	130	179	86	83	96	1151	1205	1125	980	1658
1332	Metabolite_1332	1.92	188.059	TRUE	66.02912:17 96.0464:23 124.04249:18 142.03375:25 142.05162:39 170.03094:17 170.04585:61	833	1122	924	1009	916	669	741	768	720	779	974	836	806	839	660	1303	1312	1392	1252	1059	2504	2385	2184	2923	2379	610	535	561	502	386	746	614	622	512	726
1333	Metabolite_1333	4.34	188.07	FALSE		447	373	270	411	365	131	95	71	105	101	606	744	619	676	639	136	150	120	143	134	191	216	206	254	172	159	86	87	111	93	669	437	475	633	640
1334	Metabolite_1334	2.84	188.073	TRUE	77.03623:17 91.05538:246 113.07291:27 115.0433:29 115.05289:146 115.06123:17 116.05096:17 116.06209:19 117.05564:66 117.06702:143 118.06612:1371 119.05286:16 119.06219:75 119.06857:251 119.2919:17 127.05323:62 132.0798:17 142.05798:56 142.06566:121 143.07433:468 144.05618:23 144.08041:705 145.07338:25 145.08391:171 145.91391:17 146.05899:3648 147.04332:19 147.06378:317 147.07167:86 148.06627:20 1…	153506	155427	150209	143295	142230	56021	48809	50421	58079	51729	84914	86056	85866	95363	81098	61477	64753	64593	64073	62028	43327	44712	43786	49306	42916	120259	99167	113836	104537	107821	33479	31155	30485	28128	40403
1335	Metabolite_1335	2.96	188.07	FALSE		61387	2741	2054	84292	77017	25503	28748	28325	32109	2481	48555	45679	3596	42963	43913	30433	2502	35012	39575	33250	19717	1218	15149	25029	21812	51002	2244	70313	59434	65491	19526	19026	16876	14733	17866
1336	Metabolite_1336	0.99	188.084	FALSE		499	614	661	542	583	446	560	431	432	449	358	328	514	430	357	394	544	429	531	432	495	524	558	501	536	432	407	435	365	439	570	512	548	560	582
1337	Metabolite_1337	2.06	188.091	FALSE		1097	1151	1137	968	1091	795	755	798	685	685	710	842	783	804	878	298	297	352	257	229	288	208	222	287	238	145	109	94	126	129	747	668	645	725	950
1338	Metabolite_1338	1.4	188.091	FALSE		1053	1016	1127	917	656	655	622	624	770	635	522	394	432	531	395	552	357	403	444	544	343	401	423	470	384	242	233	380	307	297	1281	1232	788	761	1113
1339	Metabolite_1339	1.77	188.094	TRUE	82.0619:17 87.04261:21 87.05129:31 101.94225:36 110.02287:31 114.05589:16 115.0441:18 130.0546:62 143.03392:17 157.01611:16	2363	2169	2576	1740	1885	1452	1238	1198	1844	1320	1660	2046	1768	1354	1097	677	594	598	671	530	517	546	559	847	647	508	329	436	410	362	1984	1514	2993	2429	2877
1340	Metabolite_1340	3.98	188.092	FALSE		253	173	141	238	216	168	135	195	175	155	111	109	108	112	118	140	174	163	150	137	256	319	293	355	375	173	108	140	116	139	408	689	559	365	601
1341	Metabolite_1341	1.66	188.101	FALSE		1320	1281	1663	1788	1525	860	963	937	1057	1352	712	785	991	1111	950	421	369	429	344	387	330	387	440	474	371	154	201	177	108	154	1219	1763	1514	1101	1111
1342	Metabolite_1342	5.71	188.202	TRUE	72.08887:18 76.07582:23 76.07961:17 145.92778:20 146.05426:16 173.05956:19 188.19301:37 188.20038:130	233	297	295	352	371	5478	583	485	626	467	1383	601	708	739	622	349	285	172	393	247	260	367	520	421	476	493	467	564	386	476	301	145	96	195	154
1343	Metabolite_1343	11.13	188.962	TRUE	106.90296:16 147.92722:51 147.93315:27 188.95042:23	1027	1195	1349	1266	1445	1362	1255	1401	1355	1219	1399	968	1061	1016	1191	1181	1065	924	995	944	995	974	1281	1257	1044	1102	1107	1111	1320	1016	1137	1040	1012	974	1071
1344	Metabolite_1344	11.07	188.961	TRUE	106.91515:16 108.90079:54 147.93745:102 149.93532:60 149.94315:50	1202	1497	1596	1442	1545	1501	1273	1396	1334	1128	1255	1526	1463	1375	1631	1351	1296	1484	1274	1248	1277	1519	1485	1435	1133	1472	1349	1319	1681	1530	1264	1438	1424	1385	1542
1345	Metabolite_1345	11.67	188.957	FALSE		1076	1055	1270	1227	1235	1147	1292	1255	1114	1277	892	820	1056	744	950	885	690	855	911	879	965	650	863	873	831	830	777	928	902	766	1311	1001	1277	1089	1197
1346	Metabolite_1346	10.99	188.958	FALSE		1346	1773	1335	1633	1621	1544	1601	1389	1561	1579	1611	1484	1445	1675	1560	1049	1352	1516	1508	1502	1604	1560	1497	1591	1531	879	1497	1405	1260	1547	1417	749	1289	1527	1474
1347	Metabolite_1347	11.22	188.959	TRUE	105.95886:19 106.9083:54 108.90646:18 147.93913:92 149.02853:47	1240	1472	1571	1443	1753	1481	1285	1588	1358	1150	1399	1053	1155	1312	1358	1073	892	1017	1236	1277	1099	1064	1180	1114	1254	1001	1136	1205	922	1099	1006	1219	1048	1168	1188
1348	Metabolite_1348	11.61	188.957	FALSE		1180	990	995	1176	1053	946	1194	898	1336	1288	892	823	1056	744	950	885	690	772	911	877	848	783	908	873	838	874	777	991	902	773	1382	1103	1377	1421	1256
1349	Metabolite_1349	11.5	188.958	FALSE		1246	1409	1326	1567	1598	1069	1400	954	1477	1145	737	1055	1056	852	863	871	771	877	806	804	868	826	867	913	788	1060	776	1010	939	1092	1675	1620	1242	1359	1252
1350	Metabolite_1350	12.8	188.98	TRUE	60.93473:16 88.94456:17 102.95283:18 103.96444:18 114.95625:23 130.04448:16	1960	2013	1942	2129	2089	1793	2031	1809	1837	1879	2009	2150	1889	1754	2031	2025	1821	2180	2030	1965	2024	1804	1858	2260	1988	1924	2042	2002	2001	2026	1780	1803	2193	2260	2086
1351	Metabolite_1351	4.64	189.04	FALSE		63	78	112	54	83	58	68	82	49	72	83	116	60	80	64	87	81	74	123	52	91	81	92	111	95	54	52	48	70	53	517	682	668	608	749
1352	Metabolite_1352	1.03	189.042	TRUE	82.04029:19 89.02226:16 111.00256:17 115.04221:30 128.06454:16 157.01038:18 189.04256:22	919	851	1179	943	1316	904	909	1079	891	1176	623	296	573	387	399	176	217	243	205	216	159	312	192	151	199	188	219	162	205	294	404	422	312	260	237
1353	Metabolite_1353	2.39	189.041	FALSE		536	765	519	634	474	589	418	432	601	438	476	447	458	512	446	178	138	152	152	200	211	167	143	168	155	93	74	65	92	147	225	415	253	250	253
1354	Metabolite_1354	1.38	189.046	TRUE	98.93831:17 101.02673:33 101.95106:16 115.04655:20 129.02101:27 143.04495:25 154.96088:33 157.01918:23 157.02682:24 157.09175:18 173.0753:23	693	541	622	504	662	588	734	620	619	773	226	179	209	272	243	91	191	141	169	173	93	146	156	98	111	143	91	99	76	71	180	243	105	122	128
1355	Metabolite_1355	1.76	189.048	FALSE		358	310	372	393	441	434	345	343	382	442	154	158	199	234	147	87	110	121	102	135	121	136	138	128	134	71	101	136	64	77	133	202	117	173	108
1356	Metabolite_1356	1.23	189.046	TRUE	83.01662:30 102.03369:29 136.06113:18 142.09189:20 153.02856:21 157.02682:16 187.00449:24	826	601	716	623	745	770	778	864	644	838	314	184	396	272	276	163	169	168	161	173	145	130	156	116	123	186	163	221	111	167	230	254	208	260	186
1357	Metabolite_1357	2.84	189.074	FALSE		19434	20051	18633	17929	18066	7499	6650	6873	7883	6837	11424	11070	11294	12703	10566	8378	8304	8512	8056	8438	6006	6204	6104	6569	5785	15511	12566	14501	12723	14613	4521	3916	4385	3554	5657
1358	Metabolite_1358	2.14	189.098	FALSE		648	543	559	809	637	542	502	574	462	523	1895	1947	1514	1675	1646	530	398	395	410	402	893	881	713	1090	851	222	382	154	234	246	869	773	821	734	1007
1359	Metabolite_1359	2.38	189.077	TRUE	79.06008:32 81.07542:34 99.0727:19 109.0716:29 135.05261:17 154.97882:18 170.03256:20 171.07567:18 172.0681:30 173.03439:17	262	280	187	193	256	253	242	289	213	238	224	236	212	152	159	160	202	184	198	136	161	90	138	181	133	117	96	101	63	103	1464	1444	1380	1355	1947
1360	Metabolite_1360	10.99	189.095	FALSE		450	421	466	588	642	653	493	522	684	714	667	495	461	467	539	559	553	468	604	528	528	523	736	542	524	466	685	422	641	438	507	507	424	543	632
1361	Metabolite_1361	0.99	189.122	FALSE		361	453	414	350	411	171	240	203	245	220	617	563	434	630	631	398	311	386	464	497	447	361	481	522	572	1118	1426	1250	1360	1426	350	585	313	314	295
1362	Metabolite_1362	1.84	189.124	FALSE		506	465	395	426	354	222	233	226	306	186	937	1392	1124	1133	1260	226	145	262	253	245	153	202	172	272	169	66	86	77	90	65	367	395	341	387	449
1363	Metabolite_1363	2.07	189.125	TRUE	107.00751:28 113.07115:17 127.03758:36 135.0099:28 143.07314:24 153.00978:24 176.0089:23	616	716	690	699	611	676	501	621	613	508	1072	1263	919	1027	1076	469	467	604	458	471	854	948	914	1022	859	298	402	176	247	372	828	892	794	798	1210
1364	Metabolite_1364	3.54	189.127	FALSE		216	216	185	173	171	337	279	396	334	312	135	121	124	125	134	548	527	476	497	506	848	831	688	899	957	204	223	243	208	242	309	252	219	261	279
1365	Metabolite_1365	2.55	189.124	TRUE	89.94219:16 132.10582:20 133.10976:20 143.13167:39 189.12975:18	602	490	497	425	487	272	174	265	296	189	1271	1547	1205	1319	1098	211	149	267	221	256	121	73	73	116	112	74	56	92	47	70	308	289	476	313	529
1366	Metabolite_1366	6.89	189.13	TRUE	91.06738:41 129.06204:25 130.04515:24 131.09145:56 132.08926:38 133.10823:25 143.08553:19 171.12921:21 189.12909:25 189.13966:88 189.14868:27	71	52	66	91	70	104	106	79	106	54	102	195	72	68	70	402	569	613	3270	727	900	689	641	954	916	835	641	885	532	537	2326	1681	1233	1670	1354
1367	Metabolite_1367	0.85	189.136	TRUE	116.07095:20 152.00134:17 189.12325:45 189.13904:65	901	907	932	868	753	983	876	1003	1093	874	502	478	345	388	273	1471	1719	2061	1863	1576	718	776	736	722	678	5716	5535	5766	6112	5431	415	453	518	397	515
1368	Metabolite_1368	0.78	189.16	FALSE		1023	945	1035	1030	813	774	960	1208	970	802	480	326	401	338	323	1812	1670	575	576	1655	873	767	704	617	570	5189	5116	1513	4707	1481	443	427	435	443	404
1369	Metabolite_1369	10.94	189.166	TRUE	69.06696:23 69.07071:17 83.04826:20 95.08492:18 107.08068:16 108.90521:16 133.09952:46 135.11615:18 144.08812:25 145.09119:20 145.10376:21 149.93391:22 149.94029:18 161.13197:18 163.14159:17 189.16246:57	293	132	238	268	260	147	134	153	185	182	343	179	347	278	323	308	308	386	571	397	1917	2357	1376	2440	1362	184	131	157	169	139	231	236	175	203	169
1370	Metabolite_1370	11.15	189.163	FALSE		197	85	158	152	170	110	153	158	103	108	226	152	232	169	243	364	547	414	666	404	1148	1550	1165	1784	688	131	137	133	143	98	146	141	132	132	182
1371	Metabolite_1371	5.7	189.205	FALSE		102	54	69	97	147	738	114	86	121	92	234	139	162	224	198	67	79	24	119	111	111	69	172	95	106	179	89	98	79	91	89	49	49	48	45
1372	Metabolite_1372	1.87	189.957	FALSE		622	420	459	622	505	481	455	394	527	576	490	346	477	501	465	236	214	269	166	214	236	227	269	193	219	144	128	153	130	147	465	500	450	388	392
1373	Metabolite_1373	1.41	189.959	FALSE		268	257	330	288	309	281	334	251	343	357	238	268	269	246	227	644	377	406	404	486	793	720	571	798	689	804	814	693	829	810	434	365	547	387	429
1374	Metabolite_1374	2.43	190.038	FALSE		537	376	405	295	313	346	385	270	288	301	388	370	298	292	298	127	104	123	95	97	90	71	84	108	83	75	65	76	87	67	513	554	885	559	766
1375	Metabolite_1375	3.11	190.052	FALSE		639	664	646	675	606	1041	860	931	1141	1028	162	275	227	225	257	117	91	103	118	95	64	84	106	142	80	87	64	100	90	91	511	565	507	583	576
1376	Metabolite_1376	1.82	190.067	FALSE		670	673	739	583	556	538	528	553	585	562	230	232	222	283	156	121	98	123	159	113	178	145	152	121	100	88	92	59	77	75	180	219	162	165	165
1377	Metabolite_1377	2.83	190.075	FALSE		2052	2226	2026	1596	1825	633	796	681	793	794	1186	1304	1252	1248	928	767	853	1016	734	935	654	879	774	782	527	1545	1193	1290	1443	1321	582	464	393	550	596
1378	Metabolite_1378	2.84	190.077	FALSE		2052	2226	2026	1649	1825	602	796	681	717	794	1186	1304	1056	1248	1168	767	853	1016	927	915	654	879	553	782	568	1545	1119	1290	1443	1236	582	464	393	550	596
1379	Metabolite_1379	2.35	190.107	FALSE		611	702	651	565	670	687	528	542	530	462	531	622	494	539	513	230	236	173	266	174	233	218	221	294	271	260	207	194	191	238	452	466	379	322	706
1380	Metabolite_1380	2.16	190.109	TRUE	102.09453:18 144.0994:74 145.09828:20 161.05617:17 190.15451:18	531	665	592	511	532	581	606	571	626	548	668	677	614	662	562	814	1184	1082	1043	1009	1024	1093	1029	1401	1054	739	726	645	759	785	468	594	493	397	555
1381	Metabolite_1381	0.84	190.138	FALSE		175	125	217	133	179	115	192	146	154	166	59	89	63	94	69	341	224	394	234	294	109	141	173	148	145	900	848	762	558	788	70	78	122	70	81
1382	Metabolite_1382	0.79	190.912	FALSE		289	291	181	295	253	265	327	285	252	349	244	291	222	217	161	915	646	593	576	648	722	770	730	953	647	78	177	98	60	109	370	354	276	260	362
1383	Metabolite_1383	11.51	190.957	FALSE		1266	1195	1401	1294	1330	1128	1274	1194	1443	1218	1021	886	870	787	965	1105	883	950	881	766	849	887	836	893	707	708	723	835	962	881	1353	1724	1385	1452	1337
1384	Metabolite_1384	10.99	190.957	FALSE		1716	1756	1795	1841	1509	1421	1502	1542	1182	1813	956	1863	1535	1318	1105	1020	1295	911	1295	1833	1287	1511	1261	1767	993	1518	1665	1686	850	999	767	1259	1660	907	1189
1385	Metabolite_1385	12.74	190.958	TRUE	105.96074:48 122.66776:19 144.98836:23 149.93884:65 149.94386:21 175.0363:20 191.11665:20	1193	1156	1068	1052	1188	1188	1006	1104	954	1178	1130	1178	1178	1247	1138	1215	1071	1278	1115	1231	1669	1051	1106	1262	1038	1185	1028	1164	1150	1218	1118	1208	1265	1354	1185
1386	Metabolite_1386	11.18	190.961	TRUE	149.03163:17 149.9304:22	1219	1033	1212	1387	965	1308	1276	1305	1076	1342	1046	1131	989	955	1184	1374	1041	882	1011	1084	958	873	918	1149	1273	1003	1071	876	1037	941	1080	928	1028	930	881
1387	Metabolite_1387	11.24	190.961	TRUE	149.03163:17 149.9304:22	1183	1238	1390	1637	1204	1181	1165	1460	1202	1200	1187	1051	1257	1065	974	1158	808	894	1071	1038	958	829	918	903	1108	930	1168	790	1037	1149	1155	1120	1128	1100	993
1388	Metabolite_1388	11.12	190.962	TRUE	109.10473:33 149.94458:55	1323	1050	998	1300	1051	1308	1261	1305	1076	1280	1035	1031	921	955	1184	1272	908	811	1138	1010	992	873	838	1081	1116	1003	1071	753	1037	745	1139	1051	984	1088	1122
1389	Metabolite_1389	11.61	190.957	FALSE		1273	1052	1370	1109	1222	1110	1251	932	1264	1162	849	740	891	959	965	705	710	840	832	851	924	1040	847	1068	846	707	1041	870	876	967	1248	1278	1328	1355	1197
1390	Metabolite_1390	12.63	190.962	TRUE	107.86061:23 108.90287:17 147.93938:32 149.93379:16 149.94064:42	1219	1217	911	1007	1028	1078	1046	1036	1074	1175	1048	1077	1055	1209	1109	993	1162	1084	1288	1133	1014	1178	1057	1296	1217	981	1041	1228	1091	1156	975	1218	1032	871	1128
1391	Metabolite_1391	11.37	190.964	TRUE	93.07322:20 108.90977:34 119.0984:20 149.02794:28 149.03622:24 149.93567:107	879	935	1038	964	1093	1038	862	968	954	940	816	891	880	908	901	1275	972	845	912	744	821	818	878	1074	839	987	827	831	804	943	997	1069	1133	942	840
1392	Metabolite_1392	12.75	190.987	FALSE		787	960	649	594	666	887	690	733	746	709	683	793	644	947	674	707	663	931	611	853	857	805	892	978	736	964	802	938	941	764	813	1131	958	924	845
1393	Metabolite_1393	12.63	190.999	FALSE		824	773	683	792	796	705	779	733	790	745	884	619	814	798	714	670	699	896	728	831	627	678	922	752	759	835	747	669	734	786	718	706	578	637	589
1394	Metabolite_1394	2.9	191.036	FALSE		839	1074	998	1247	951	855	753	750	945	697	1622	1777	879	1681	1280	2962	3059	2651	3059	2946	4037	4011	4495	4624	4232	1569	1305	1115	1465	1167	601	602	429	640	724
1395	Metabolite_1395	2.88	191.037	FALSE		1003	1039	1170	1016	826	767	820	750	701	729	1356	1506	1283	1428	1293	3259	3350	2823	3352	2774	4182	4180	4333	4806	4415	1766	1243	1283	1401	1179	601	602	429	640	694
1396	Metabolite_1396	0.98	191.057	TRUE	57.03179:41 83.04946:46 99.04174:59 117.05263:29 128.96141:18 131.02933:21 173.04106:18 175.0414:27 175.91351:16 191.06183:16	517	488	510	379	399	285	319	285	299	281	217	214	267	236	215	794	663	1107	1266	822	1196	1034	1208	1360	1153	3330	3638	3372	3065	3692	290	440	309	359	398
1397	Metabolite_1397	1.14	191.054	TRUE	83.04636:16 86.95127:41 96.96008:24 145.04488:20 145.05235:40 150.6817:24 173.04234:25 174.04561:20	393	204	210	195	210	236	340	236	226	248	140	130	153	103	126	724	619	716	759	683	804	622	776	845	685	2046	2307	1653	1722	1883	267	288	218	292	321
1398	Metabolite_1398	10.64	191.069	FALSE		69	114	92	121	142	138	72	135	111	129	33	76	46	54	66	61	58	61	47	46	47	74	61	71	58	57	46	51	43	56	775	901	600	737	348
1399	Metabolite_1399	8.97	191.072	TRUE	152.02806:51 152.52773:18 173.0721:21	653	825	694	1086	1344	631	611	676	692	781	120	81	119	106	152	80	162	118	93	92	80	104	91	121	71	43	77	72	56	52	3804	3819	2604	3262	2754
1400	Metabolite_1400	4.39	191.076	TRUE	69.06543:18 112.95704:25 149.0965:24 152.96393:20 189.12056:17 191.14917:16	422	418	407	418	276	346	272	312	257	368	631	580	483	660	521	1355	1517	1243	1339	1256	1596	1603	1594	1737	1578	396	277	375	391	354	395	429	411	366	436
1401	Metabolite_1401	0.94	191.106	FALSE		591	417	477	480	455	261	349	328	369	220	419	381	356	369	359	2353	1823	2291	2471	2081	784	706	904	1015	754	290	337	363	388	424	447	416	312	363	398
1402	Metabolite_1402	3.87	191.108	TRUE	108.90106:28 131.08534:16 133.04274:42 145.05849:20 191.10976:21	1552	1618	1684	1452	1394	576	568	535	684	580	118	144	123	162	206	186	281	306	263	347	155	194	139	162	114	95	159	199	71	130	188	232	186	170	315
1403	Metabolite_1403	3.46	191.116	TRUE	107.04701:16 115.05302:18 117.06733:41 131.08229:23 131.08936:17 191.11157:27	1836	2100	1702	2080	1887	751	1948	1832	1956	1935	188	277	233	225	362	733	1448	1270	1195	622	970	1111	611	519	903	940	482	677	679	817	358	397	445	445	433
1404	Metabolite_1404	3.54	191.145	TRUE	106.06742:18 121.10144:16 133.08966:16 149.0941:19 149.93219:16 191.14102:20	379	371	408	447	331	668	654	869	662	647	252	345	363	406	362	1276	1377	1262	1267	1343	802	895	1311	1024	1337	913	854	848	728	930	545	688	557	491	702
1405	Metabolite_1405	6.38	191.164	FALSE		504	503	720	630	336	409	769	681	492	882	577	926	540	465	557	485	269	434	174	351	709	306	502	586	385	595	386	528	524	545	476	618	665	783	757
1406	Metabolite_1406	10.38	191.177	FALSE		79	102	72	76	67	104	86	146	97	51	63	96	68	75	134	200	208	170	405	206	519	625	554	610	401	98	94	63	68	120	94	80	65	138	91
1407	Metabolite_1407	11.15	191.181	FALSE		156	147	148	160	143	164	120	178	166	222	158	168	168	261	180	319	454	305	631	415	1052	1186	1017	1483	676	262	144	148	160	127	171	235	155	224	175
1408	Metabolite_1408	11	191.183	FALSE		295	210	265	208	176	198	142	189	222	222	205	287	198	743	245	375	424	333	620	451	1594	1268	1025	1292	758	403	179	319	181	254	260	235	170	197	210
1409	Metabolite_1409	11.64	191.18	FALSE		87	93	83	56	120	122	54	57	87	67	55	135	97	84	70	213	240	301	454	297	608	624	381	737	332	86	98	59	138	73	108	111	106	130	90
1410	Metabolite_1410	2.08	192.006	FALSE		373	441	453	548	532	261	391	294	351	435	796	661	691	601	738	600	411	481	489	573	564	756	541	597	669	146	161	151	199	130	340	268	295	305	365
1411	Metabolite_1411	0.86	192.056	TRUE	139.99614:18 145.04134:16 160.96747:16	436	392	467	373	296	567	575	538	581	530	720	742	600	920	672	441	418	349	548	533	557	403	484	544	347	358	425	331	303	354	1538	890	846	1573	1012
1412	Metabolite_1412	0.97	192.054	FALSE		436	391	467	373	295	478	361	434	581	571	968	896	821	1262	867	441	361	349	548	533	557	387	468	293	294	567	519	432	464	432	803	942	1012	1041	1265
1413	Metabolite_1413	2.83	192.066	FALSE		578	579	553	651	586	712	574	559	549	620	703	678	671	680	678	663	561	566	628	651	439	424	515	494	418	784	639	708	709	811	526	490	562	523	470
1414	Metabolite_1414	8.94	192.075	FALSE		219	172	190	210	268	157	156	152	136	234	55	31	74	55	40	66	78	54	73	45	57	62	54	49	54	42	32	58	64	134	585	595	501	666	487
1415	Metabolite_1415	1.86	192.107	TRUE	119.02036:20 133.01036:27 176.97879:30 192.11345:50	1978	2071	1949	1834	1903	1322	1178	1180	1462	1257	1480	1695	1501	1720	1145	914	841	804	868	823	740	748	815	809	795	824	743	663	676	751	820	799	782	749	1232
1416	Metabolite_1416	6.9	192.139	FALSE		238	386	271	240	211	272	484	249	188	255	199	509	233	187	205	281	326	292	174	297	397	204	392	449	267	551	175	291	243	187	445	649	572	680	559
1417	Metabolite_1417	6.92	192.142	FALSE		238	386	271	240	211	272	484	249	188	255	199	509	233	187	205	281	326	292	174	222	397	204	392	449	267	498	175	291	243	187	445	649	572	680	631
1418	Metabolite_1418	2.29	193.01	FALSE		219	250	217	263	248	452	339	354	453	407	411	347	285	316	470	729	778	723	813	947	921	889	875	957	916	658	551	656	774	699	435	464	343	509	425
1419	Metabolite_1419	2.31	193.01	FALSE		219	250	217	263	248	452	339	354	453	407	411	347	285	316	470	914	1022	800	957	807	828	1010	875	922	806	607	540	587	620	600	435	464	343	509	406
1420	Metabolite_1420	1.67	193.039	FALSE		630	834	592	574	536	236	287	270	283	241	1379	1283	1178	1077	1220	185	202	236	172	156	120	219	127	136	194	111	57	74	86	93	1037	946	811	699	755
1421	Metabolite_1421	2.88	193.047	FALSE		232	208	190	182	227	192	221	173	205	188	242	222	207	249	219	393	362	407	401	388	562	510	565	708	564	235	219	216	274	200	202	191	180	212	269
1422	Metabolite_1422	11.03	193.048	FALSE		1096	943	472	568	1152	591	410	536	560	499	210	220	438	119	170	311	1118	496	220	361	134	93	165	424	120	103	75	246	96	125	2492	3448	1953	3753	3513
1423	Metabolite_1423	3.6	193.051	TRUE	68.0683:20 85.02328:17 85.02905:17 106.04443:16 109.02566:19 147.04895:17 152.96167:18 153.01743:41 177.06026:17 193.04712:517 193.08275:17 193.11124:16	573	677	581	665	706	752	664	742	702	640	299	396	360	420	296	362	313	310	228	215	344	269	469	457	326	192	131	181	126	139	12731	8474	7562	9636	10646
1424	Metabolite_1424	10.94	193.049	FALSE		1048	1321	1115	1109	2275	1763	1108	859	1646	1599	278	983	1591	401	553	1322	954	513	773	536	492	168	153	1567	190	135	88	184	118	125	7820	7598	6965	6751	2556
1425	Metabolite_1425	10.88	193.05	TRUE	155.10779:30 175.03505:20 193.04948:16	1743	1217	990	1117	1961	1396	1087	747	1346	1447	278	778	1563	401	553	1150	1173	547	707	631	492	168	153	1621	190	135	96	184	118	91	7100	8247	6816	7121	6616
1426	Metabolite_1426	11.51	193.049	FALSE		521	484	203	286	605	297	343	389	434	262	98	101	275	92	218	382	518	260	230	284	72	118	197	299	105	59	38	98	87	75	1987	1934	1579	1722	1857
1427	Metabolite_1427	3.16	193.052	TRUE	133.03099:18 134.2793:20 190.45662:43 193.04102:19 193.05226:41	452	358	497	339	522	939	654	690	618	685	291	295	324	236	274	1692	1573	1437	1692	1586	1795	2010	1974	2167	1908	1895	1166	1190	1303	1030	4280	3402	3361	3561	4402
1428	Metabolite_1428	4.28	193.052	TRUE	105.07716:29 193.05899:85 193.06714:26	428	506	660	331	447	395	312	544	370	356	683	670	720	848	620	1103	1310	1214	1374	1285	363	772	396	1094	385	751	520	1037	691	584	2067	1496	1495	2014	2101
1429	Metabolite_1429	5.23	193.052	TRUE	193.03973:43 193.0502:249	144	201	209	144	152	193	136	134	159	179	108	116	88	123	143	125	94	100	120	168	126	150	120	116	119	87	116	106	62	68	3474	2300	1910	2068	2078
1430	Metabolite_1430	3.81	193.049	FALSE		125	137	136	137	150	93	91	106	105	132	79	135	62	82	100	130	173	159	188	129	197	192	155	190	166	102	115	104	126	119	1152	828	830	983	1150
1431	Metabolite_1431	2.3	193.055	FALSE		131	196	201	172	119	168	143	303	148	103	170	170	160	166	137	353	395	335	369	415	499	637	975	534	468	246	206	220	180	144	149	164	138	213	261
1432	Metabolite_1432	0.96	193.073	FALSE		632	995	711	719	730	1456	1608	1346	1587	1247	1223	1590	1469	1395	1409	551	420	532	677	584	682	762	777	704	669	382	311	284	301	273	517	513	497	530	494
1433	Metabolite_1433	4.64	193.084	FALSE		130	143	202	221	171	180	156	148	148	143	211	189	154	183	110	324	274	287	366	333	407	397	306	392	381	163	141	166	144	147	349	258	302	344	306
1434	Metabolite_1434	4.08	193.086	FALSE		347	457	510	443	389	325	400	376	544	353	385	485	327	325	286	764	662	740	707	720	748	709	674	799	739	432	409	455	487	442	2556	2229	1760	1799	2092
1435	Metabolite_1435	3.07	193.087	TRUE	105.06901:69 118.03963:23 131.04779:16 133.0666:66 146.03482:20 146.04352:24 154.99701:18 161.04514:16 161.06088:141 162.05051:35 162.06789:18 181.7883:18 193.0782:44 193.0864:38	672	703	701	661	693	994	900	979	1013	1000	572	563	542	555	519	803	744	806	751	808	605	621	685	768	618	223	219	250	318	225	6072	6462	5584	4950	6547
1436	Metabolite_1436	4.42	193.088	TRUE	113.96516:17 161.05902:16 193.07649:45 193.09515:18	172	173	164	174	155	178	147	206	221	139	191	192	142	149	198	1007	1158	1142	1304	1120	789	1064	970	1079	973	233	219	216	207	174	420	492	415	357	382
1437	Metabolite_1437	3.36	193.087	FALSE		422	377	433	311	421	448	559	544	513	537	354	388	374	630	324	839	834	967	920	1031	880	961	951	1032	846	673	595	536	590	684	487	516	510	479	679
1438	Metabolite_1438	3.55	193.116	FALSE		293	346	414	305	370	243	253	244	270	311	120	110	107	100	143	201	200	138	174	163	260	142	296	291	218	111	123	184	134	108	237	178	219	241	205
1439	Metabolite_1439	6.22	193.118	FALSE		355	415	360	341	353	112	93	172	84	100	431	524	662	564	518	145	167	120	152	113	113	103	124	110	155	108	215	87	98	83	128	204	167	176	258
1440	Metabolite_1440	11.36	193.157	FALSE		382	228	272	326	388	177	174	278	246	267	210	137	161	176	423	280	199	215	286	214	495	724	692	708	176	180	133	243	181	145	344	402	482	543	347
1441	Metabolite_1441	5.68	193.16	FALSE		272	186	237	234	196	236	178	206	284	198	575	553	521	621	697	244	294	252	275	346	81	139	68	78	74	51	58	87	61	49	192	138	146	152	198
1442	Metabolite_1442	4.63	193.16	TRUE	95.09476:21 103.05933:21 119.08826:16 133.07185:37 135.12576:18 144.60513:28 163.07944:16 175.05377:17	372	522	391	343	330	731	688	687	752	713	343	344	253	287	281	1568	1811	1612	1599	1516	1022	846	891	979	931	681	646	596	543	628	796	872	697	517	978
1443	Metabolite_1443	3.73	193.159	FALSE		277	307	395	394	297	1104	1009	921	1122	1063	67	99	76	90	68	204	248	259	225	315	291	301	334	329	275	113	75	109	91	118	124	153	122	134	169
1444	Metabolite_1444	4.34	193.16	FALSE		425	367	411	344	383	564	615	689	743	626	323	346	320	397	339	449	450	465	403	453	329	227	272	364	316	90	63	78	87	82	256	210	188	122	179
1445	Metabolite_1445	4.07	193.159	FALSE		89	119	109	118	76	825	684	697	873	876	99	111	84	91	66	124	122	91	171	157	149	277	151	259	179	51	55	52	57	106	155	89	65	126	105
1446	Metabolite_1446	7.05	193.162	FALSE		830	583	575	578	546	564	580	474	862	511	681	501	652	663	926	767	831	707	836	591	576	559	629	857	606	637	547	667	597	612	754	790	682	629	758
1447	Metabolite_1447	12.12	193.161	FALSE		305	140	161	109	216	323	172	111	225	213	291	774	348	617	218	580	195	160	307	247	550	148	184	528	131	420	220	370	265	184	216	102	393	241	370
1448	Metabolite_1448	2.3	194.02	FALSE		183	213	200	267	198	392	400	342	277	315	331	393	320	323	343	733	623	746	580	549	594	470	505	553	608	489	559	583	643	657	344	363	380	317	414
1449	Metabolite_1449	0.84	194.033	FALSE		566	616	741	662	685	169	193	280	245	224	252	317	220	257	298	221	175	189	183	167	124	147	152	173	83	401	306	362	282	363	93	150	104	141	124
1450	Metabolite_1450	10.89	194.052	FALSE		290	203	115	221	292	268	200	177	320	187	124	172	259	95	106	198	270	129	181	149	68	51	66	268	63	96	47	63	55	49	672	950	1106	544	676
1451	Metabolite_1451	3.16	194.051	FALSE		104	116	193	102	81	225	120	168	130	148	80	85	92	94	80	325	248	289	410	279	316	351	357	442	342	425	261	290	225	207	908	525	477	551	617
1452	Metabolite_1452	3.61	194.052	FALSE		195	121	141	147	165	162	171	188	171	196	134	111	109	177	78	119	74	82	86	123	83	134	233	102	108	68	77	85	66	59	1724	1266	887	1046	1502
1453	Metabolite_1453	3.07	194.087	FALSE		126	131	177	137	181	256	174	166	239	230	115	116	107	147	143	236	252	145	135	174	109	133	196	131	183	132	147	83	70	91	730	932	970	712	1031
1454	Metabolite_1454	11.09	194.154	FALSE		227	195	239	240	318	264	233	180	232	201	120	96	109	134	129	114	133	151	104	134	120	127	100	101	86	129	111	111	106	131	1407	1214	1112	1322	946
1455	Metabolite_1455	10.97	194.154	FALSE		196	114	186	157	160	146	105	144	164	163	120	96	92	134	129	114	102	151	92	91	120	127	139	78	83	129	75	111	106	131	590	930	553	562	467
1456	Metabolite_1456	1.01	195.031	TRUE	111.02688:33 139.03645:23 157.05164:21 167.0441:16 177.01132:16 193.06081:21 195.03394:48 195.04233:46	2400	2125	2207	2077	1978	2400	2409	2806	2849	2550	3141	3265	2911	3712	2801	346	377	382	528	311	502	680	648	617	563	228	252	310	206	266	1343	2139	1783	1762	1828
1457	Metabolite_1457	1.27	195.031	FALSE		414	566	530	588	554	537	697	611	778	635	600	748	607	630	728	152	147	187	144	161	187	179	150	167	188	65	70	57	45	87	397	445	420	445	414
1458	Metabolite_1458	2.99	195.031	TRUE	161.06885:21	1544	1642	1500	1440	1285	1507	1402	1431	1771	1616	1304	1796	1612	1868	1214	404	310	314	369	263	430	527	375	402	588	168	237	187	245	161	452	320	316	365	374
1459	Metabolite_1459	1.83	195.031	TRUE	75.58815:25 105.0295:60 121.02574:16 151.03568:20 167.02682:75 177.0148:30 177.02203:22 195.02559:463 195.03883:88	14797	16197	15415	14641	14794	19997	19218	19107	21373	20235	17571	19109	18414	17970	17738	1242	1155	934	1101	1134	1930	2099	1835	2071	1961	360	346	307	328	326	9712	11718	9374	9154	12160
1460	Metabolite_1460	2.3	195.03	TRUE	137.02763:20 152.05574:31 156.98308:20 167.04219:63 177.02242:16	733	730	616	592	772	1107	1010	1147	1123	1206	1086	1329	1668	1191	1704	5102	5944	5333	5364	5205	6851	7025	6915	7515	6959	1680	1438	1635	1805	1536	1318	1683	1164	1017	1803
1461	Metabolite_1461	2.11	195.03	TRUE	155.96468:16 180.00204:19 180.01028:28 181.00259:20 181.01677:16 195.02692:36	1540	1661	1297	1676	1145	893	997	813	1017	1035	4315	4691	4184	4114	3866	1372	1366	1378	1430	1344	1956	1823	1749	1977	1766	332	273	217	358	200	932	1007	960	846	1233
1462	Metabolite_1462	2.56	195.028	FALSE		422	496	524	393	518	430	395	426	378	467	355	452	479	543	542	515	663	568	565	575	885	895	902	980	803	167	91	85	101	124	212	178	214	199	217
1463	Metabolite_1463	2.55	195.03	FALSE		422	512	524	393	494	430	395	426	395	467	355	452	479	543	526	515	662	568	541	575	1037	793	1045	996	803	167	91	85	101	124	220	178	214	199	217
1464	Metabolite_1464	1.7	195.034	TRUE	121.0363:18 139.0358:30 139.04216:25 195.03284:98	5524	6574	6901	7037	650	8385	9983	8062	9387	8000	7243	7264	7139	8502	1624	440	511	1000	634	615	869	993	774	784	917	192	143	169	150	155	3756	4672	4048	4129	5159
1465	Metabolite_1465	10.11	195.06	FALSE		74	165	176	158	172	125	169	196	130	137	116	81	121	87	74	102	86	230	91	211	88	86	99	68	136	85	120	80	86	109	780	544	522	715	574
1466	Metabolite_1466	10.49	195.062	TRUE	121.02413:16 153.13068:16	97	174	131	172	131	91	242	236	110	80	151	88	116	73	100	126	804	263	262	202	257	492	253	567	299	119	165	90	123	131	362	408	254	370	181
1467	Metabolite_1467	8.04	195.061	FALSE		129	124	113	116	126	141	100	149	135	89	79	84	120	57	97	186	94	209	112	198	70	65	88	60	129	72	126	71	96	98	636	730	511	651	502
1468	Metabolite_1468	2.93	195.064	FALSE		854	836	640	751	557	666	628	758	1524	667	289	390	227	462	219	750	822	704	641	627	629	716	767	649	526	443	456	415	537	570	1360	1301	1166	922	1052
1469	Metabolite_1469	11.11	195.067	TRUE	55.01416:18 67.01574:32 67.02274:23 83.00912:17 91.05713:20 94.03359:19 109.06292:29 121.02768:238 121.06142:98 121.06709:27 122.06868:42 131.04788:16 149.05977:107 150.067:17 153.06494:16 167.06595:18 177.04189:58 177.05453:579 178.05261:41 178.06097:16 179.06433:20 195.06494:1516	1293	1613	537	1101	1443	1237	926	1030	933	969	167	188	401	184	152	348	1554	225	324	300	170	155	168	447	350	126	149	127	126	108	43719	44851	36389	42048	49513
1470	Metabolite_1470	10.77	195.071	TRUE	177.05815:23 195.05949:45	161	1079	204	110	132	107	335	473	164	120	179	110	167	147	178	89	1270	152	162	202	82	169	98	122	131	134	123	84	116	64	311	251	213	231	171
1471	Metabolite_1471	8.99	195.067	TRUE	149.05843:31 177.04089:16 177.06497:51 195.07355:62	131	204	195	200	192	175	182	171	159	200	136	60	100	107	145	129	120	245	124	203	203	101	153	92	287	123	115	77	64	89	1551	1996	1379	1382	1290
1472	Metabolite_1472	3.4	195.065	FALSE		391	390	533	432	318	432	423	406	387	330	218	257	258	224	240	522	667	474	585	522	573	719	798	641	689	195	197	144	165	192	813	968	786	884	765
1473	Metabolite_1473	3.59	195.065	FALSE		973	874	734	781	717	956	879	757	1092	847	701	583	447	736	564	462	692	414	404	367	687	445	627	450	470	153	145	156	115	96	659	685	673	633	759
1474	Metabolite_1474	8.46	195.069	FALSE		163	220	182	189	188	135	129	148	217	159	85	108	88	75	72	178	84	241	90	213	88	94	68	80	372	84	103	84	73	81	607	530	534	657	484
1475	Metabolite_1475	2.88	195.066	FALSE		854	853	670	768	521	683	628	758	1016	683	198	293	189	238	219	696	687	704	603	662	632	653	699	725	526	443	456	415	537	570	1271	1215	1152	969	1126
1476	Metabolite_1476	9.86	195.068	FALSE		97	123	136	141	125	121	127	137	132	84	121	115	110	87	111	83	122	148	133	177	137	101	78	138	176	94	202	102	100	90	700	957	687	741	431
1477	Metabolite_1477	10.99	195.066	TRUE	177.05815:23 195.05949:45	434	1081	324	355	549	361	386	789	348	299	135	203	290	134	121	294	1669	225	177	267	165	223	182	274	235	138	145	123	169	132	5964	5615	4555	5465	5660
1478	Metabolite_1478	4.32	195.066	TRUE	89.03614:31 162.02536:19 177.04903:40 178.90544:62	1134	1205	988	975	1095	1264	982	973	1080	1002	285	386	244	477	339	252	292	246	201	220	194	218	255	189	176	116	70	86	71	146	208	181	142	205	236
1479	Metabolite_1479	10.26	195.069	FALSE		114	168	164	165	132	127	198	224	145	177	137	69	111	82	108	124	108	230	92	146	66	170	65	97	128	85	173	85	87	134	503	641	668	656	728
1480	Metabolite_1480	9.27	195.077	TRUE	68.94997:24 115.97359:16 136.53595:28 151.07864:20 195.07359:35	84	116	131	171	113	107	158	128	156	151	127	65	155	177	72	103	98	248	110	187	255	87	74	119	175	93	155	78	79	106	140	149	219	108	88
1481	Metabolite_1481	0.92	195.087	FALSE		544	597	467	477	355	717	573	807	766	593	508	444	452	545	523	870	723	809	762	831	397	396	328	439	402	225	227	229	186	270	627	624	631	644	634
1482	Metabolite_1482	4.75	195.117	FALSE		1529	1400	1592	1444	1399	1199	1029	1242	1267	1329	138	196	142	142	160	215	189	215	224	209	217	215	358	320	186	153	96	106	131	101	684	692	739	729	701
1483	Metabolite_1483	4.68	195.106	FALSE		365	416	365	323	381	279	229	165	224	290	101	196	127	100	145	199	189	225	194	145	216	211	198	223	256	97	113	120	94	84	768	570	642	661	785
1484	Metabolite_1484	2.45	195.124	FALSE		1331	247	235	221	245	410	491	199	344	221	405	379	311	361	271	516	211	219	356	306	329	220	497	432	171	539	361	317	438	368	358	225	349	276	284
1485	Metabolite_1485	11.06	195.131	FALSE		755	510	479	438	699	503	491	400	397	494	512	404	585	525	589	437	457	445	406	541	357	493	416	370	399	456	344	375	404	365	580	445	478	397	514
1486	Metabolite_1486	2.46	195.124	FALSE		903	247	235	221	245	410	491	199	344	221	405	379	311	361	271	516	211	219	356	306	329	220	497	432	171	539	361	317	438	368	358	225	349	276	284
1487	Metabolite_1487	4.16	195.14	TRUE	97.96168:16 107.05637:18 137.09836:19 137.10803:22 148.08282:19 153.06039:25 177.1366:16 195.11096:17 195.15634:16	183	238	232	299	233	403	480	409	536	507	91	131	100	126	163	1031	1111	1086	1058	974	820	894	883	922	851	518	465	354	423	404	363	363	286	450	516
1488	Metabolite_1488	4.81	195.139	TRUE	93.06546:34 154.98679:24 155.12701:20	1333	1381	1373	1320	1239	1003	962	1108	1168	1132	134	86	124	162	89	143	123	109	143	146	193	162	240	246	185	105	96	85	74	89	743	715	627	564	794
1489	Metabolite_1489	12.83	195.996	TRUE	98.96586:16 113.94073:28 115.95892:19 115.96651:58 115.97207:20 126.98009:20 142.87068:17 155.96982:22 158.00806:29 195.92564:20	1585	1645	1659	1635	1714	1608	1475	1565	1455	1449	1781	1933	1526	1917	1541	1631	1543	1684	1619	1673	1877	1859	2103	1938	1534	1657	1563	1388	1609	1547	1598	1569	1993	1902	2045
1490	Metabolite_1490	12.94	195.997	TRUE	92.96652:20 113.97033:84 115.96691:17 138.96663:29 139.939:25 142.96384:18 146.48589:32	1061	962	914	951	769	871	845	744	991	804	1046	1001	707	935	892	1052	775	927	865	749	903	993	874	1266	763	1038	927	883	863	993	869	1009	1028	1154	1092
1491	Metabolite_1491	1.83	196.032	FALSE		1679	1830	1587	2320	1790	2392	2179	2098	1622	2406	2101	2113	1992	2314	2054	152	177	228	229	230	301	410	272	404	432	103	94	87	85	89	1367	845	722	1290	1600
1492	Metabolite_1492	2.29	196.034	FALSE		228	175	161	149	130	204	169	184	216	214	245	230	227	222	228	650	657	660	622	758	766	907	877	1035	800	280	372	237	337	228	217	222	270	227	264
1493	Metabolite_1493	0.8	196.05	TRUE	196.05429:23	272	310	300	339	355	340	420	337	328	412	70	124	130	92	94	734	788	1065	800	759	541	527	524	576	551	2953	2601	2457	2516	2485	112	116	140	83	80
1494	Metabolite_1494	10.99	196.069	FALSE		127	311	73	110	116	131	108	226	75	116	89	75	107	68	59	90	339	148	59	126	72	66	100	99	84	67	68	61	44	58	786	865	746	907	714
1495	Metabolite_1495	0.95	196.083	FALSE		182	208	212	186	205	150	201	118	146	275	119	145	111	225	161	359	408	496	431	480	251	225	217	231	262	653	590	601	612	882	134	194	143	164	150
1496	Metabolite_1496	10.97	196.169	FALSE		335	327	466	543	570	469	418	362	433	543	203	155	116	214	120	128	145	99	97	160	92	126	104	119	136	173	114	119	81	125	4949	5206	3518	4664	2548
1497	Metabolite_1497	11.09	196.169	FALSE		150	244	169	219	182	156	201	206	225	162	137	102	98	125	104	107	119	99	97	111	92	89	128	89	97	131	98	76	141	125	1872	1089	812	970	665
1498	Metabolite_1498	2.9	197.046	FALSE		486	553	356	426	409	324	252	360	351	425	566	585	645	782	642	1687	1466	1487	1692	1696	2245	3084	2704	2892	2737	897	761	748	966	814	284	297	261	231	369
1499	Metabolite_1499	10.99	197.047	FALSE		559	440	464	250	865	488	268	344	400	339	109	273	395	107	267	490	411	351	345	397	192	146	109	786	85	107	66	117	65	114	1474	1445	1410	1436	1630
1500	Metabolite_1500	2.15	197.054	FALSE		412	405	445	367	447	241	247	207	207	276	713	588	700	695	886	348	355	527	357	848	528	508	634	621	477	207	201	196	203	163	264	201	276	226	362
1501	Metabolite_1501	8.32	197.057	FALSE		346	338	474	283	217	314	228	413	298	340	80	85	137	67	101	178	143	153	82	173	76	119	137	114	149	105	80	70	69	119	888	1582	271	340	321
1502	Metabolite_1502	4.64	197.08	FALSE		174	324	264	393	270	186	255	256	159	266	92	87	160	78	126	162	214	187	138	147	160	163	130	160	141	147	118	128	141	157	701	570	611	623	852
1503	Metabolite_1503	3.72	197.078	TRUE	105.06635:20 123.08367:17 161.05699:18 181.07935:20	848	1177	983	1125	1133	936	691	807	972	802	164	255	199	259	218	161	266	168	188	187	137	160	154	185	200	114	99	109	151	116	3772	2483	2670	3136	3175
1504	Metabolite_1504	9.97	197.082	TRUE	134.07715:21 153.05614:26 155.07629:17 179.07002:51 179.08067:35 197.09:358	212	495	461	321	422	689	399	602	528	701	125	133	136	100	113	113	109	109	144	139	59	81	85	129	136	114	83	84	68	93	2978	4107	1434	1487	1032
1505	Metabolite_1505	6.94	197.082	TRUE	96.95902:16 105.06883:32 108.62044:20 116.92865:21 137.96355:22 154.98615:28 155.06895:42 157.9967:33 176.14587:18 179.06987:21 182.08099:18 197.07021:36 197.08182:232	180	383	295	309	275	251	213	224	339	303	167	148	425	126	130	137	443	135	243	295	84	242	98	336	263	224	120	127	121	119	1822	2366	829	1112	1038
1506	Metabolite_1506	3.58	197.085	FALSE		163	248	261	241	219	269	191	267	320	255	124	141	223	358	143	343	226	406	236	270	212	347	220	702	211	125	136	131	158	118	992	698	594	852	843
1507	Metabolite_1507	12.77	197.079	FALSE		97	80	172	135	96	85	75	77	108	109	134	59	85	82	84	114	95	149	94	99	103	83	84	73	128	76	56	54	67	124	169	209	199	160	213
1508	Metabolite_1508	5.06	197.083	TRUE	116.97756:20 151.07156:41 155.0683:18 197.08109:84 197.08849:27	201	331	231	196	283	235	201	236	221	208	139	160	186	237	189	160	246	178	151	220	117	215	126	184	128	166	136	115	115	116	1833	1153	1397	1437	1949
1509	Metabolite_1509	3.44	197.08	FALSE		186	219	187	224	202	169	139	266	157	159	113	141	251	399	143	414	430	343	414	330	569	719	476	656	547	147	175	231	158	151	365	240	394	316	434
1510	Metabolite_1510	11.74	197.081	TRUE	137.0558:19 164.04857:24 197.08846:63	480	356	107	370	565	404	255	222	271	362	73	121	252	73	95	131	198	70	114	183	69	133	103	260	72	121	62	82	57	53	2489	2027	2074	2566	2363
1511	Metabolite_1511	10.37	197.083	TRUE	74.92854:19 88.33238:17 95.08334:45 108.05437:20 109.06182:36 133.06134:47 151.07863:19 152.07866:16 161.05634:20 179.05855:17 179.07065:113 180.08298:45 181.07669:16 197.01808:19 197.04097:17 197.08099:992	517	538	368	526	590	238	259	182	301	258	112	160	247	99	58	226	245	102	116	111	127	74	98	252	150	79	96	51	63	93	19748	19458	17035	18503	19081
1512	Metabolite_1512	6.2	197.08	FALSE		128	293	204	258	154	138	174	236	300	98	97	80	193	118	94	162	321	299	121	126	87	98	113	133	222	131	107	260	86	135	247	226	137	306	194
1513	Metabolite_1513	5.52	197.083	TRUE	54.63224:18 55.71099:19 96.96301:16 121.06244:23 143.39317:20 158.97133:21 179.07246:17 197.06996:19 197.08229:99 197.09334:26	264	268	327	254	253	348	313	308	472	359	202	209	263	185	187	465	290	381	211	265	105	137	111	160	263	167	121	116	100	110	3991	2851	2880	3109	3667
1514	Metabolite_1514	3.87	197.082	TRUE	91.0611:16 96.96522:17 105.0341:42 105.03948:15 113.96082:16 116.97993:23 117.93631:33 133.10275:20 157.99855:16	1020	1093	975	1063	861	634	622	647	663	611	1306	1628	1204	1279	1217	1124	1037	1120	1040	990	1333	1464	1340	1540	1398	538	376	354	387	384	562	534	480	533	570
1515	Metabolite_1515	9.53	197.083	TRUE	78.36919:20 91.04967:20 97.94701:32 151.08208:28 155.07167:16 155.08194:33 159.0209:20 164.048:22 179.06682:40 179.07562:27 195.06613:37 197.0817:240	118	132	199	169	160	158	143	94	113	219	79	64	140	71	60	67	145	158	99	78	97	111	73	116	113	120	112	63	84	87	1455	2404	1596	828	579
1516	Metabolite_1516	3.73	197.083	TRUE	116.97292:27 179.07822:31 180.07497:20 197.07599:21 197.08437:16	881	1036	847	961	950	698	729	679	847	704	164	255	199	259	218	161	266	168	188	173	148	160	154	185	203	114	99	109	151	134	3309	2032	2428	2684	3090
1517	Metabolite_1517	6.4	197.085	TRUE	72.934:23 113.95938:25 154.95117:18 158.95633:21	160	318	295	247	322	151	152	267	246	138	192	101	122	182	107	151	479	270	147	141	205	127	135	124	327	135	115	193	124	106	367	293	326	284	320
1518	Metabolite_1518	9.39	197.084	TRUE	91.05811:26 93.07424:17 151.07864:16 159.53165:19 179.03317:20 197.0808:103 197.09039:139	82	134	168	169	154	113	105	118	148	174	106	95	163	90	109	116	145	163	116	146	89	168	70	182	119	105	112	66	84	102	2142	2411	1842	2159	1714
1519	Metabolite_1519	10.01	197.083	TRUE	93.07697:29 108.05976:24 149.06807:41 151.07864:16 155.07887:17 167.0441:28 177.06395:18 179.08356:58 181.05554:24 197.08614:424	212	495	479	337	422	635	415	899	523	660	125	133	136	109	113	113	146	109	144	139	59	75	73	129	136	114	83	90	58	93	2639	4109	1414	1686	1219
1520	Metabolite_1520	10.88	197.083	TRUE	95.01105:16 111.1264:19 151.08194:115 179.07555:25 197.07953:37 197.08919:44	3444	4400	2298	3901	5346	3106	3649	2287	3843	3323	564	1053	3616	430	784	1477	3520	949	1490	1234	381	220	161	3257	526	161	109	204	162	80	37361	41928	35416	36412	34198
1521	Metabolite_1521	3.07	197.078	TRUE	52.94656:18 73.0229:27 73.07146:17 94.96851:16 96.95689:17 96.96292:22 125.0625:16 141.97971:16 151.03676:17 151.04121:36 158.95758:45 197.08611:18	153	296	159	140	164	194	153	165	145	145	171	166	163	202	194	525	604	519	508	597	340	392	2076	332	260	1148	853	811	817	1067	160	190	132	128	153
1522	Metabolite_1522	2.28	197.083	FALSE		162	164	165	154	225	167	133	139	177	133	128	160	114	112	130	921	863	886	978	856	1478	1475	1510	1783	1429	551	464	465	458	448	269	341	264	251	392
1523	Metabolite_1523	9.91	197.085	TRUE	91.05391:18 123.0793:21 151.06949:18 155.07652:16 179.06757:22 197.08101:358 197.09737:26	212	495	479	286	422	639	415	899	523	701	59	87	121	100	90	113	109	93	70	120	66	135	60	99	103	114	72	84	123	93	2785	4341	1099	2093	1256
1524	Metabolite_1524	11.54	197.082	TRUE	111.03271:16 179.08572:18 197.06573:34 197.07874:134 197.09386:18	805	631	556	640	559	430	588	534	860	446	119	214	613	154	279	429	609	308	454	303	186	218	140	821	122	210	71	91	114	75	3672	3835	3349	3661	4521
1525	Metabolite_1525	8.26	197.084	TRUE	115.94461:18 119.03799:16 155.06689:22 158.96127:17 159.00009:16 179.07268:16 180.07364:25 197.08133:236	110	121	195	176	136	114	121	101	143	116	69	72	125	62	81	77	133	97	68	82	78	75	65	142	132	122	78	84	76	99	888	1379	322	327	370
1526	Metabolite_1526	4.44	197.083	FALSE		603	403	472	563	653	430	413	542	437	441	119	118	217	172	91	183	211	153	191	212	186	175	156	207	152	249	201	225	194	212	1818	1247	1405	1544	1726
1527	Metabolite_1527	6.72	197.086	TRUE	113.96812:92 115.9668:20 179.06747:19	106	583	284	283	168	108	194	281	398	425	102	284	554	119	96	419	522	241	91	312	249	200	155	396	353	223	145	258	102	125	154	351	146	217	142
1528	Metabolite_1528	6.56	197.088	TRUE	89.94417:19 115.96177:28 164.06223:20 179.08394:19	120	302	308	198	289	102	153	281	400	332	119	308	120	117	101	329	289	241	104	151	249	168	117	230	302	154	134	281	84	166	129	191	79	228	189
1529	Metabolite_1529	5.66	197.088	FALSE		290	400	383	504	348	181	163	188	225	197	165	156	170	135	113	117	181	141	114	132	103	131	111	97	263	157	145	84	109	133	887	784	556	615	853
1530	Metabolite_1530	8	197.091	TRUE	65.12113:16 74.10197:20 115.96854:27 158.97838:27 179.08394:19 180.06769:33 197.0965:19	125	146	131	166	101	102	134	142	111	161	84	81	155	77	107	67	140	119	60	104	80	100	91	129	111	76	65	79	66	72	343	467	203	285	185
1531	Metabolite_1531	6.8	197.088	TRUE	197.09233:20 197.10728:81	111	586	272	287	166	112	194	176	384	441	98	284	459	113	90	443	501	241	136	296	189	242	155	348	357	226	145	258	121	137	495	749	450	588	516
1532	Metabolite_1532	6.31	197.09	TRUE	96.96465:34 111.09039:21 159.97148:19 197.08813:16	269	338	295	247	343	151	195	266	284	149	192	183	193	118	151	274	502	297	195	214	206	148	157	222	292	173	215	345	124	246	398	293	326	438	424
1533	Metabolite_1533	5.95	197.091	FALSE		129	264	273	174	163	89	186	176	235	171	129	138	158	121	93	262	419	144	198	185	128	156	129	233	149	182	200	177	157	174	186	181	118	174	154
1534	Metabolite_1534	0.79	197.1	FALSE		36	52	68	58	62	51	35	42	50	40	43	45	74	82	64	127	135	170	172	159	190	182	137	150	163	991	806	736	797	785	42	47	45	41	41
1535	Metabolite_1535	3.61	197.118	FALSE		142	244	148	176	184	327	343	422	444	394	103	99	145	135	162	524	420	470	533	632	713	725	633	703	679	165	201	162	146	167	202	221	208	153	258
1536	Metabolite_1536	11.04	197.116	FALSE		581	363	556	368	596	890	669	580	1147	1028	243	221	443	244	333	172	188	165	215	175	178	265	227	260	252	177	169	137	174	193	330	318	414	340	295
1537	Metabolite_1537	2.6	197.128	FALSE		223	200	210	155	222	171	174	77	160	141	612	612	598	623	651	78	117	126	120	99	65	102	57	64	67	64	63	51	54	68	163	264	175	208	215
1538	Metabolite_1538	10.97	197.173	FALSE		413	266	320	305	338	434	216	251	262	285	254	305	265	484	329	256	335	318	263	297	254	312	361	271	278	320	210	288	297	233	931	837	771	757	605
1539	Metabolite_1539	0.97	198.076	FALSE		370	370	328	399	354	456	363	374	456	437	644	683	676	736	668	161	197	165	152	180	165	194	220	203	258	100	134	144	136	152	376	650	541	486	513
1540	Metabolite_1540	1.21	198.078	FALSE		605	746	538	559	612	716	724	734	670	794	859	1080	948	948	850	285	174	138	186	189	146	126	109	144	145	80	50	89	60	67	690	726	756	743	791
1541	Metabolite_1541	11.57	198.083	FALSE		180	126	120	120	110	87	74	174	183	86	66	74	131	72	77	113	116	56	79	74	65	55	55	134	79	74	50	61	64	46	535	650	558	606	640
1542	Metabolite_1542	0.79	198.124	FALSE		104	63	100	58	63	106	77	62	66	72	75	124	118	73	118	274	437	260	345	271	402	269	281	291	286	728	611	704	598	783	98	70	75	82	68
1543	Metabolite_1543	0.73	198.942	FALSE		2908	3063	2796	2824	2989	3719	3472	3176	3568	3466	4083	3817	4098	3858	3981	4170	3567	3803	3216	3677	4677	4111	4634	5233	4441	915	584	575	711	580	5247	3500	6235	6612	7465
1544	Metabolite_1544	2.94	199.024	TRUE	96.95769:57	716	708	601	645	594	1332	1098	1013	1031	1131	152	304	228	183	125	356	204	200	225	219	223	239	206	285	186	161	222	175	206	207	472	584	537	357	673
1545	Metabolite_1545	2.6	199.062	TRUE	73.95278:16 96.95731:17 126.09689:25 140.03218:36 140.04547:38 155.07207:17 158.95961:52 182.9606:26	251	234	178	178	202	143	177	139	183	189	208	228	181	275	205	1281	1284	1261	1126	1385	1087	1016	1107	1076	940	2116	1709	1756	1965	1501	203	227	180	167	245
1546	Metabolite_1546	2.86	199.062	TRUE	122.03988:18 140.04979:16 151.03844:23 155.06389:16 155.07376:38 158.96492:22 199.05563:27	113	115	92	84	95	136	129	134	135	91	122	149	158	109	147	774	967	895	905	876	296	317	322	483	382	1489	1039	1103	1153	1160	176	178	169	126	153
1547	Metabolite_1547	2.43	199.06	FALSE		244	262	234	199	232	259	231	192	214	270	349	283	251	300	452	522	525	469	616	416	651	633	589	621	763	243	214	194	1920	143	179	183	162	161	196
1548	Metabolite_1548	11.51	199.06	FALSE		99	419	54	220	567	102	138	394	137	71	77	82	72	67	70	108	472	60	73	83	144	150	128	79	239	56	53	91	209	66	76	166	111	91	138
1549	Metabolite_1549	11.08	199.063	FALSE		106	1025	147	88	210	140	309	828	207	239	85	407	189	89	97	339	1308	190	118	108	224	239	137	255	212	122	58	191	112	74	686	870	513	685	774
1550	Metabolite_1550	10.88	199.083	FALSE		145	1097	131	152	202	164	303	542	227	221	62	210	125	86	93	238	1642	92	110	137	147	167	106	126	125	57	76	82	98	73	527	595	675	656	671
1551	Metabolite_1551	4.14	199.076	FALSE		120	156	152	134	149	174	169	133	81	93	78	78	108	74	84	246	373	209	276	298	319	384	322	482	356	278	245	166	217	272	579	765	664	572	700
1552	Metabolite_1552	11.79	199.147	FALSE		239	161	104	136	232	297	187	129	113	418	117	117	163	134	191	129	162	160	192	161	131	109	82	130	114	120	113	149	95	111	754	711	780	1054	485
1553	Metabolite_1553	11.58	199.149	FALSE		349	207	191	143	195	433	250	252	208	277	317	167	487	238	476	366	300	313	626	307	144	143	156	169	104	217	127	136	151	183	442	475	281	538	308
1554	Metabolite_1554	8.61	199.17	FALSE		784	600	785	566	398	664	622	654	599	665	557	661	793	202	626	641	625	596	374	726	667	562	1080	650	649	328	547	808	649	687	557	544	918	824	400
1555	Metabolite_1555	8.65	199.17	FALSE		791	600	781	566	398	664	681	654	599	665	557	1112	776	202	626	896	609	596	374	726	1025	544	982	1118	649	328	547	789	649	687	557	528	900	850	416
1556	Metabolite_1556	10.99	199.171	FALSE		506	432	600	614	312	364	607	523	426	442	312	1247	451	440	431	477	459	410	383	481	1111	396	561	606	383	473	354	563	471	393	303	332	396	391	459
1557	Metabolite_1557	10.86	199.17	FALSE		1977	1775	2301	2282	1181	1040	2863	1692	1780	2024	1503	4061	1690	1093	1882	1810	1592	1736	1042	1841	3679	1264	3209	2726	1666	2162	1235	2355	1646	1480	1609	1518	2815	3101	2491
1558	Metabolite_1558	6.64	199.183	TRUE	57.78603:18 74.09292:18 96.95416:19 96.95821:54 199.17697:37 199.18553:77	2708	3727	3073	3426	3183	3233	2716	3062	3558	3177	1200	1289	1267	1403	1237	1020	933	1225	1231	1126	733	776	654	753	654	436	309	413	677	406	1640	1576	2146	2150	2515
1559	Metabolite_1559	8	199.183	TRUE	97.96191:16 139.48991:19 156.99277:19 158.95743:20 199.17752:76	1622	2459	1894	2208	2511	1651	2130	1741	2699	2688	734	644	820	621	610	613	569	726	695	625	372	276	199	341	243	210	168	169	338	252	952	789	856	1147	917
1560	Metabolite_1560	0.73	199.941	FALSE		805	520	599	536	542	648	615	603	705	617	637	596	673	596	707	887	766	700	716	991	900	1211	924	941	823	214	250	139	208	131	856	672	1131	1325	1405
1561	Metabolite_1561	12.93	199.975	FALSE		856	619	637	361	721	813	451	450	425	423	567	500	622	821	475	561	741	464	529	422	462	483	930	539	509	872	531	540	486	501	465	591	559	494	1062
1562	Metabolite_1562	2.9	200.02	FALSE		243	306	273	300	259	307	290	332	311	257	442	518	633	472	532	699	655	693	607	742	713	748	722	735	678	725	820	776	662	734	310	339	235	305	384
1563	Metabolite_1563	2.91	200.091	FALSE		854	849	933	781	557	844	758	674	807	710	922	946	881	940	941	451	384	347	497	921	251	259	280	288	232	101	93	110	122	124	753	745	630	560	1202
1564	Metabolite_1564	11.43	200.155	FALSE		330	382	585	550	711	347	356	369	338	307	128	113	179	75	165	62	59	66	116	69	101	81	116	153	60	118	87	78	59	104	629	843	650	718	612
1565	Metabolite_1565	6.64	200.184	FALSE		457	616	602	828	662	546	501	646	538	708	258	259	233	351	284	291	208	200	234	287	146	170	128	207	229	112	137	99	87	109	431	342	496	405	532
1566	Metabolite_1566	0.72	200.975	TRUE	108.95818:93 108.96923:21 109.96049:20 110.00357:21 110.96415:25 117.06504:16 140.97075:50 141.04128:19 150.79156:16 154.97073:35 182.96043:328 183.95882:33 183.96568:16 184.95108:36 185.96733:62 186.96057:18	22916	22924	22889	19883	19753	20081	16950	18219	19815	18309	39680	41802	37071	42689	39756	12405	13277	12419	11445	11697	10533	12177	11412	12793	10950	2935	1840	1672	2034	1659	26746	26106	26415	25289	30605
1567	Metabolite_1567	12.79	200.974	FALSE		501	425	411	477	468	357	429	462	489	381	439	575	457	536	458	506	401	472	499	427	538	447	490	629	414	529	393	473	474	447	396	524	573	506	545
1568	Metabolite_1568	0.85	201.036	FALSE		334	374	241	276	263	216	106	181	123	113	620	554	626	607	599	423	419	507	505	387	327	297	253	428	296	238	261	234	253	248	271	269	348	281	278
1569	Metabolite_1569	5.43	201.129	TRUE	119.08356:41 120.95592:20 121.05959:24 143.0815:16 145.06378:20 157.10182:16 173.13176:24 201.12129:106	616	538	496	449	533	411	239	314	328	334	1092	1020	932	678	1004	244	305	301	342	353	162	142	179	212	124	99	84	79	67	131	269	327	195	228	296
1570	Metabolite_1570	2.44	201.124	FALSE		561	464	432	461	336	189	220	176	236	133	792	784	778	833	710	215	198	190	167	184	90	101	84	119	76	74	81	61	76	78	207	212	184	167	268
1571	Metabolite_1571	4.29	201.128	FALSE		512	536	488	566	364	348	277	403	293	258	190	203	258	199	200	663	624	527	620	605	119	146	152	154	163	245	276	281	245	318	250	280	206	223	333
1572	Metabolite_1572	11.36	201.164	FALSE		280	221	348	640	464	272	211	207	240	287	94	131	208	93	154	143	156	220	168	197	374	480	463	613	102	87	82	65	104	87	728	557	569	641	376
1573	Metabolite_1573	11.78	201.166	FALSE		165	124	95	106	170	204	128	140	117	266	86	78	155	133	140	128	57	70	131	131	94	88	45	124	60	76	60	80	86	46	880	658	866	812	384
1574	Metabolite_1574	10.94	201.164	FALSE		261	173	176	186	228	227	143	194	144	208	155	160	142	136	164	218	205	251	274	279	727	580	417	698	454	143	108	113	155	159	280	369	179	299	216
1575	Metabolite_1575	11.58	201.163	FALSE		449	345	252	299	365	374	244	199	302	351	444	261	524	343	583	575	334	404	769	432	120	131	68	197	77	130	69	123	111	78	534	580	522	530	471
1576	Metabolite_1576	1.61	201.96	TRUE	102.05495:39 113.94034:20 123.9429:16 142.96555:43 145.93172:34 145.95012:24 159.08214:22 171.00774:21	1386	1545	1592	1511	2009	1675	1837	1406	1630	1636	1353	997	1310	1219	1328	1415	1590	1662	1730	1898	1726	1630	1612	1278	1421	566	471	454	536	428	1356	1578	1569	1607	1237
1577	Metabolite_1577	1.45	201.959	TRUE	87.04388:34 112.04092:16 145.01479:20	1784	1815	1789	1285	1862	976	1051	1078	1035	1060	1201	1582	1238	1090	1511	867	1155	1100	902	1207	744	789	721	534	794	173	212	182	174	145	2093	1873	1858	3092	1708
1578	Metabolite_1578	1.77	201.956	FALSE		2595	1483	1155	2193	3303	2117	2179	1804	2101	2057	1671	2118	2303	1559	2200	1856	1983	2009	1971	2126	1689	1895	1689	1470	1632	545	547	437	608	487	2675	1259	2876	3137	2492
1579	Metabolite_1579	1.33	201.957	FALSE		1614	1798	1747	1365	1739	501	508	488	646	701	2356	1301	1427	1197	1461	374	427	369	317	351	224	188	218	231	280	149	115	159	152	109	2251	2111	1754	1529	1477
1580	Metabolite_1580	1.7	201.958	TRUE	140.0294:16 143.95607:45 145.92847:19 145.96562:17 194.0273:26	2386	2039	1982	2051	2602	1749	1891	1559	1415	1796	1932	1805	1769	1905	1747	1458	1590	1673	1762	1817	1471	1586	1364	1213	1411	481	513	391	607	494	2258	2116	2957	2685	2324
1581	Metabolite_1581	2.46	201.959	TRUE	96.96566:21 111.96563:18 132.10582:16 158.96686:21 182.06752:17	739	669	582	698	794	542	691	570	656	624	283	334	286	305	316	191	234	180	203	177	173	167	164	260	131	224	172	130	166	240	922	897	878	868	927
1582	Metabolite_1582	0.71	201.974	FALSE		6376	7194	6700	6100	6055	6856	5715	5855	5742	5467	11970	12305	11425	13188	11854	3814	3853	3761	3824	3402	3386	3829	3702	3963	3191	948	752	685	766	628	7768	7950	7808	7182	9448
1583	Metabolite_1583	12.93	201.975	FALSE		1342	583	512	586	656	1415	515	532	662	633	632	643	615	1477	599	683	1206	613	481	608	743	506	1508	692	502	1180	464	552	580	633	668	671	705	736	1841
1584	Metabolite_1584	0.73	201.974	FALSE		6491	7194	6700	6100	6055	5983	5715	5855	5742	5467	11970	12305	11425	12118	11854	3814	3853	3761	3824	3402	3386	3829	3702	3963	3431	948	752	685	766	628	7768	7950	7808	7182	9448
1585	Metabolite_1585	12.81	201.98	FALSE		754	500	434	375	380	684	416	323	387	463	681	407	439	833	429	461	650	413	474	388	425	334	708	400	326	626	291	355	432	423	405	393	346	406	734
1586	Metabolite_1586	2.6	201.992	FALSE		107	147	200	173	212	153	137	199	160	145	239	178	205	202	254	183	161	149	200	152	205	234	247	213	247	94	102	134	97	85	515	716	692	601	683
1587	Metabolite_1587	2.41	202.092	TRUE	72.04642:23 116.03317:24 142.99966:25 159.03853:17 186.95161:20 202.12717:22	2899	3275	3449	3358	3290	2405	2470	2278	2376	2077	2074	2107	2497	2363	2140	932	1232	1033	875	1071	782	1081	811	1148	902	291	325	223	301	256	2016	1818	1469	1500	2120
1588	Metabolite_1588	0.97	202.072	FALSE		224	315	405	339	226	220	157	220	227	257	143	173	176	174	209	445	404	413	401	365	203	258	244	226	232	783	721	601	644	823	315	280	380	286	398
1589	Metabolite_1589	2.49	202.109	TRUE	88.10464:16 99.0793:16 104.64674:16 112.03244:27 132.09862:24 158.12439:20 184.01521:24 184.09868:52 200.18127:17 202.10393:89 202.1134:94	2919	3292	3280	3201	3149	2403	2001	2026	2230	1918	2138	2247	2098	2461	2079	918	1159	854	905	935	747	885	793	786	826	293	325	215	232	279	1857	2071	1635	1599	2361
1590	Metabolite_1590	3.74	202.123	FALSE		94	103	94	121	111	98	101	97	128	76	203	210	232	220	147	218	193	173	146	137	253	122	88	107	78	52	70	46	57	61	427	661	398	268	320
1591	Metabolite_1591	0.98	202.182	FALSE		402	204	305	353	219	170	234	176	139	470	342	375	203	253	330	814	235	535	274	769	2151	263	327	621	332	396	223	354	226	252	169	242	188	274	609
1592	Metabolite_1592	1.78	202.183	TRUE	84.04906:24 102.10085:32 114.97527:23 143.94604:17 145.93968:18 186.97375:19 202.18991:153 202.20259:20	403	350	211	464	465	285	213	299	202	601	415	523	409	377	481	483	223	413	296	505	1685	236	242	435	240	223	203	178	130	147	173	118	185	143	506
1593	Metabolite_1593	4.95	202.215	FALSE		288	87	67	90	117	74	116	187	99	51	182	153	214	257	187	93	145	457	194	83	105	96	144	198	93	686	141	119	187	127	59	101	83	65	87
1594	Metabolite_1594	0.72	202.973	TRUE	84.98481:21 108.96238:18 109.95633:19 109.96558:68 112.9632:23 138.97044:34 139.97285:33 140.9659:107 141.97125:23 182.9595:17 182.96712:23 183.96021:33 183.96678:37 184.96133:164 201.96825:23	7523	7469	7132	6111	6069	7254	5377	5600	6351	6023	12736	13470	11939	13808	12764	3748	4216	3839	3714	3625	3157	3990	3859	3974	3258	1070	692	656	627	790	8567	8155	8700	8073	10036
1595	Metabolite_1595	0.9	203.053	FALSE		556	448	469	474	451	761	788	643	739	620	617	763	669	838	712	1078	1038	1100	954	911	851	708	795	812	731	690	529	348	447	366	770	762	675	619	831
1596	Metabolite_1596	2.07	203.083	TRUE	203.14256:16	2174	2163	2106	1867	1837	2519	1922	2121	2419	2217	816	788	739	945	633	1659	1621	1700	1517	1591	1191	1287	1278	1407	1095	500	455	473	641	547	733	1130	1082	690	1572
1597	Metabolite_1597	3.63	203.136	FALSE		231	352	138	272	111	142	284	142	173	188	224	377	295	190	164	279	122	328	203	361	206	188	159	211	139	432	166	184	337	91	115	163	229	216	333
1598	Metabolite_1598	2.53	203.141	TRUE	102.97207:18 132.09622:18 132.10567:16 133.10649:18 135.41875:16 202.11104:16 203.14514:17	1330	1234	1238	999	989	618	423	379	589	507	3475	4033	2967	3756	2978	489	520	615	557	550	106	82	101	89	92	66	54	61	52	42	823	753	539	683	1283
1599	Metabolite_1599	2.07	203.14	TRUE	71.05844:22 86.10055:19 100.92804:17 111.95924:27 143.02925:18 143.92946:16 170.04607:19 177.01964:17 180.03523:19 203.13725:42	733	610	613	546	707	393	333	398	506	347	3092	3466	3120	3516	3136	433	503	530	544	469	170	150	187	163	139	61	116	64	79	103	1166	594	540	1034	800
1600	Metabolite_1600	2.38	203.141	FALSE		489	559	547	476	529	274	183	210	361	260	942	974	770	925	804	224	183	257	151	188	92	85	63	72	93	42	54	57	51	52	385	426	375	417	509
1601	Metabolite_1601	11.44	203.143	FALSE		540	401	661	636	731	189	148	338	234	311	104	176	126	102	189	112	78	103	110	93	109	134	109	145	94	64	81	90	91	87	1038	696	621	1141	392
1602	Metabolite_1602	0.93	203.152	FALSE		410	580	424	530	315	291	235	347	280	287	151	160	133	167	160	441	471	616	410	495	366	314	280	396	296	1217	994	1013	1046	997	218	333	197	259	212
1603	Metabolite_1603	9.99	203.181	FALSE		787	686	593	731	817	682	442	468	490	476	434	318	346	400	324	347	456	380	535	438	120	166	129	154	117	189	114	141	120	91	681	763	911	841	823
1604	Metabolite_1604	11.64	203.179	FALSE		281	205	208	197	407	388	252	285	298	320	127	99	173	89	159	111	163	117	164	149	210	205	134	248	125	84	117	72	67	61	2383	2296	1658	1997	1005
1605	Metabolite_1605	11.71	203.179	FALSE		281	205	208	197	407	388	252	285	298	320	127	99	173	102	159	111	163	117	164	149	210	205	134	248	147	84	117	61	67	77	1768	2088	1542	1844	765
1606	Metabolite_1606	10.99	203.18	FALSE		341	454	383	381	615	802	501	556	424	522	424	340	671	414	471	669	615	681	903	890	631	697	471	719	477	179	170	243	148	175	689	1011	759	894	688
1607	Metabolite_1607	10.11	203.181	TRUE	95.08681:16 203.1918:25	1020	933	923	1356	1381	1023	793	984	725	962	565	475	605	537	695	616	624	615	777	797	122	155	142	165	154	105	102	78	75	61	1453	1840	1683	2010	1769
1608	Metabolite_1608	11.44	203.18	FALSE		531	556	582	679	493	158	186	292	308	331	113	95	120	93	173	166	81	106	113	113	96	124	131	146	157	88	61	52	91	68	818	1434	874	1007	374
1609	Metabolite_1609	11.92	203.18	TRUE	162.99292:16 203.17024:47 203.18613:49	330	247	155	156	330	376	210	278	122	387	147	115	212	153	256	129	97	97	239	150	100	66	69	97	56	51	60	96	62	49	1113	854	1304	1642	658
1610	Metabolite_1610	6.03	203.18	FALSE		151	210	197	148	142	215	119	127	173	143	99	98	77	177	95	122	128	113	125	117	302	356	374	334	411	69	74	116	61	45	630	703	576	482	588
1611	Metabolite_1611	10.54	203.182	TRUE	95.08885:22 108.09059:16 121.10837:18 124.96084:17 135.12398:19 149.02937:33 203.18623:42	612	770	761	948	1092	1205	748	1005	1250	1014	805	553	933	593	1015	966	1124	1302	2097	1565	234	268	186	230	220	111	105	77	105	110	1657	2140	1724	1965	1400
1612	Metabolite_1612	7.22	203.182	FALSE		382	305	279	406	321	172	129	96	93	95	384	289	300	341	350	275	248	257	277	279	228	237	201	241	203	57	68	118	78	36	1148	833	716	931	886
1613	Metabolite_1613	0.72	203.924	FALSE		586	640	430	468	564	535	594	542	459	523	519	453	384	555	553	492	524	608	480	498	511	493	456	512	535	526	408	412	411	388	553	501	471	531	592
1614	Metabolite_1614	0.72	203.971	FALSE		1464	1133	1286	1167	1309	1382	1036	1206	1157	1151	2283	2060	1902	2308	2307	668	729	957	681	798	841	762	958	1018	645	268	217	111	152	265	1582	1457	1553	1685	1727
1615	Metabolite_1615	12.93	203.971	FALSE		618	331	202	290	228	530	284	282	349	207	249	347	263	614	256	335	572	299	211	279	254	255	569	277	210	491	255	290	228	215	326	294	323	247	725
1616	Metabolite_1616	0.74	203.974	FALSE		1464	1360	1159	1167	1309	1332	1036	1154	1216	1222	2283	2115	1863	2520	2168	656	759	823	681	798	661	762	797	1018	645	268	217	111	152	265	1248	1660	1590	1685	1728
1617	Metabolite_1617	2.06	204.083	FALSE		644	515	576	530	546	627	562	667	783	666	242	293	224	216	227	598	567	585	565	505	506	554	457	495	445	237	272	188	292	251	440	461	397	383	416
1618	Metabolite_1618	0.96	204.089	TRUE	84.0424:16 114.05437:43 166.96417:31 204.0836:33 204.09167:46	2809	2965	2351	2941	2510	2095	2079	1870	2203	1738	1476	1834	1794	1618	1056	8833	7781	8229	8492	8447	8722	8888	8603	9553	8572	1930	1868	1471	908	2454	2376	1441	2687	2573	1564
1619	Metabolite_1619	1.4	204.126	TRUE	85.02517:17 157.06276:24 158.9407:20 204.05679:17 204.11218:42 204.129:18	95	111	127	116	91	58	105	84	80	95	94	115	94	117	69	1210	1065	1079	1201	1049	1262	1217	1136	1490	1421	83	63	84	102	69	312	248	332	277	420
1620	Metabolite_1620	0.97	204.118	FALSE		2415	584	936	520	494	690	270	844	1008	542	650	453	382	718	583	2657	2184	2363	2223	2080	2698	2915	2980	3388	2962	559	661	665	587	435	900	615	1286	667	1572
1621	Metabolite_1621	7.53	204.14	TRUE	107.07807:17 204.12959:29 204.14403:54	1044	1068	865	873	1218	1204	1014	866	1126	1046	1260	1203	855	1217	915	1094	911	988	1129	1251	971	959	1257	861	1008	1086	976	1209	961	837	1116	967	1108	1017	1116
1622	Metabolite_1622	7.51	204.139	TRUE	136.11797:20 204.14703:20	865	995	1070	941	1286	1410	1248	979	1380	1007	929	1005	859	955	803	634	1011	654	1294	856	1144	700	1107	884	1195	1125	1162	1000	1003	1156	824	1090	906	1009	774
1623	Metabolite_1623	1.79	204.134	FALSE		650	676	652	730	668	506	425	449	449	412	505	536	478	584	480	425	409	427	396	420	321	333	248	350	334	284	288	278	321	287	466	339	264	400	488
1624	Metabolite_1624	0.73	204.97	FALSE		607	771	776	598	720	568	569	619	611	599	992	1310	865	1454	1487	402	459	467	351	435	432	418	549	401	360	249	88	105	169	131	698	604	742	740	812
1625	Metabolite_1625	4.65	205.046	FALSE		56	134	63	58	58	80	98	54	60	87	146	57	83	91	59	96	71	125	128	94	102	111	109	129	126	93	70	86	79	72	572	590	565	661	617
1626	Metabolite_1626	2.26	205.052	FALSE		203	261	346	210	202	162	137	213	163	121	601	481	618	761	535	831	713	792	774	795	445	489	401	528	402	235	148	228	193	193	178	219	248	228	275
1627	Metabolite_1627	2.36	205.055	TRUE	73.06626:20 120.08344:23 149.0592:16 166.08662:25 205.04626:32	209	238	297	210	242	156	137	213	163	176	591	625	621	597	612	1263	1260	1169	1114	1078	444	489	401	540	402	235	224	228	209	212	182	142	160	133	275
1628	Metabolite_1628	3.36	205.055	TRUE	55.05427:27 67.0032:39 89.0255:36 118.05997:16 177.05408:72 179.05551:25	961	889	831	795	727	537	502	557	619	458	1441	1646	1406	1679	1183	2377	2153	2200	2389	2264	2974	2995	3174	3410	2875	626	604	549	624	450	448	680	520	538	645
1629	Metabolite_1629	5.69	205.067	FALSE		106	98	85	134	84	88	116	149	124	97	87	75	92	83	74	587	682	980	1003	978	799	1232	777	1210	1063	200	184	200	153	116	203	205	158	131	165
1630	Metabolite_1630	5.68	205.073	TRUE	83.01664:17 109.03455:18	106	85	83	134	67	88	116	149	124	97	87	75	92	78	74	568	639	675	864	833	780	1080	627	1089	961	210	160	200	153	116	216	205	158	139	165
1631	Metabolite_1631	5.86	205.074	TRUE	85.02777:22 122.03706:34 145.05788:17	127	159	157	141	239	118	209	92	182	179	232	217	248	247	304	608	808	742	817	745	715	951	658	873	734	194	219	227	182	244	603	627	701	543	670
1632	Metabolite_1632	4.2	205.082	TRUE	161.08795:26 164.03474:39 164.04245:128 164.39714:18 165.04259:22 167.0442:40 205.07355:56 205.08211:41	177	184	143	199	209	186	159	113	160	142	142	224	159	127	164	157	198	148	140	232	2320	2825	2151	2758	2393	132	118	124	124	121	333	432	261	239	401
1633	Metabolite_1633	4.95	205.082	FALSE		123	134	131	165	130	139	128	117	178	98	109	115	122	106	104	362	443	396	625	419	587	591	511	639	626	243	191	229	196	269	219	193	256	243	264
1634	Metabolite_1634	10.38	205.087	FALSE		566	520	599	646	524	512	527	516	656	612	481	707	540	797	462	568	426	573	482	768	468	624	619	815	532	676	559	665	442	520	685	451	653	623	773
1635	Metabolite_1635	9.42	205.088	TRUE	121.09213:28 178.0941:16	551	541	597	546	574	490	549	691	441	641	102	76	161	164	134	89	88	103	116	100	68	161	64	76	112	69	78	71	76	74	1782	1969	1089	1570	926
1636	Metabolite_1636	0.95	205.086	FALSE		586	644	709	781	594	543	560	631	652	534	376	332	487	327	311	698	545	1278	1130	1258	1287	1140	1094	1251	1350	518	637	528	709	752	419	473	403	516	472
1637	Metabolite_1637	2.97	205.097	FALSE		2669	26625	2060	24460	24333	7583	8978	10031	9802	8784	14721	14170	14579	1413	13693	13942	11880	15880	15020	14052	12861	12542	9905	16318	13531	1571	19438	21864	20353	19691	5676	5566	5050	5136	1085
1638	Metabolite_1638	2.84	205.1	TRUE	77.03541:24 91.05252:16 91.06017:16 97.96882:18 115.05863:50 116.06164:23 117.05479:47 117.06673:18 117.07847:16 118.05353:33 118.06792:443 119.06086:111 119.07067:16 127.04892:17 127.0582:19 130.06339:138 132.07867:185 132.08614:56 133.08368:22 142.06445:84 143.07773:25 144.06845:16 144.07623:110 144.08344:225 144.9567:22 145.84729:17 146.05983:1097 147.06343:61 148.06686:49 159.08168:20 159.094…	53051	57260	53913	52210	47813	21193	19748	20261	23707	19478	29266	32346	28404	32709	27800	24532	22455	24366	23174	23441	17151	18060	18352	21688	17380	40635	33896	37296	34318	36430	12432	11712	12948	11252	17389
1639	Metabolite_1639	1.81	205.119	FALSE		486	387	452	350	369	184	212	188	187	173	968	1220	1078	1139	925	185	191	183	242	197	164	111	75	89	142	143	81	62	76	141	237	274	230	188	297
1640	Metabolite_1640	0.97	205.119	FALSE		527	484	456	495	505	321	372	397	331	346	452	610	592	496	484	1212	651	780	907	806	747	733	765	559	884	745	467	684	373	402	507	416	421	478	797
1641	Metabolite_1641	5.42	205.124	TRUE	121.06368:22 204.08659:16 205.1256:17	543	444	482	455	435	345	302	364	412	315	646	754	767	812	584	210	292	281	238	355	155	97	132	173	112	84	86	80	104	78	187	191	153	122	173
1642	Metabolite_1642	4.3	205.125	FALSE		275	211	231	258	250	265	194	252	199	215	158	162	135	207	170	587	564	595	489	480	119	177	134	131	134	216	218	273	264	243	220	181	121	147	223
1643	Metabolite_1643	6.65	205.144	FALSE		792	503	553	535	341	758	560	523	393	653	516	871	457	197	518	656	573	517	394	496	842	580	965	756	561	191	331	646	421	441	488	512	591	608	252
1644	Metabolite_1644	6.66	205.145	FALSE		729	503	553	625	341	758	823	523	393	653	516	934	457	197	637	656	650	517	394	496	820	562	1225	957	561	191	331	1014	421	441	488	512	674	810	252
1645	Metabolite_1645	10.56	205.196	TRUE	79.05779:29 81.07288:66 107.09042:63 121.10915:20 125.12778:17 135.1216:17 135.97441:17 149.02046:21 203.17889:16 205.2012:92	1345	1377	1531	1821	1696	1179	2508	3203	1142	3657	1302	1022	1281	1218	1664	1470	1438	1591	2298	2250	344	261	240	492	227	145	175	168	151	176	5194	5949	5113	6273	4932
1646	Metabolite_1646	10.94	205.197	TRUE	105.07331:29 109.09744:16 135.11665:34 149.13159:56 150.134:16	1874	3230	3250	4609	4367	3128	2365	2825	2804	3160	1800	1414	2036	1321	2174	2109	977	2295	3646	1245	363	338	327	450	404	236	209	302	341	297	7966	7577	6271	6801	5807
1647	Metabolite_1647	10.84	205.194	FALSE		4227	3961	3891	4820	5172	3840	2986	3540	3666	3836	2061	2046	2707	1591	2373	2453	1529	2729	4880	3493	285	338	327	491	229	236	155	302	238	207	1694	2118	1908	2140	10160
1648	Metabolite_1648	10.65	205.197	TRUE	97.09533:17 121.10133:24 122.1088:16 149.02277:27 205.1972:106	3013	3406	3283	4159	4198	3596	2346	3062	2921	3463	1210	928	1380	1059	1544	1311	1349	1245	2089	1890	270	261	240	492	227	145	144	190	283	176	10038	13193	11583	13378	11049
1649	Metabolite_1649	10.26	205.197	TRUE	107.06155:21 107.08587:20 109.10281:20 130.91823:17 131.96919:16 149.1326:17 161.13242:17 163.1414:16 204.07971:19 205.19662:124	3294	3793	3209	4441	4350	3399	2384	3058	2818	3186	1422	1062	1739	1410	1527	1872	2050	1984	2653	2164	461	299	362	408	398	178	203	211	223	211	10564	14151	13096	1427	12413
1650	Metabolite_1650	11.01	205.195	FALSE		4284	1796	1715	4877	5204	3909	1327	1490	1722	3898	2077	2046	2712	1575	1035	863	1536	2746	4903	3549	363	338	309	471	420	236	209	302	325	297	1652	10291	1639	12179	10173
1651	Metabolite_1651	10.14	205.196	FALSE		1727	1545	1466	1879	1874	1962	1405	1232	1061	1408	597	526	613	840	679	735	1151	906	906	952	131	172	123	140	118	78	102	88	93	56	4002	1485	5724	610	7815
1652	Metabolite_1652	2.43	206.048	FALSE		275	207	293	239	295	577	504	634	435	502	278	167	161	173	162	861	607	620	623	623	695	713	733	751	707	207	181	200	186	177	183	170	238	228	184
1653	Metabolite_1653	4.11	206.081	TRUE	79.05094:17 118.06451:19 120.0788:39 153.08925:24 161.13106:21 188.06654:24	813	812	778	650	819	610	470	612	594	512	1545	1532	1563	1537	1377	1032	1311	983	1101	1035	2153	1846	2467	2309	2033	307	297	431	363	262	2826	3818	2032	1917	3314
1654	Metabolite_1654	4.1	206.086	TRUE	97.11281:16 101.04591:19 103.05473:21 121.08866:27 151.07864:16 191.14101:27	796	923	743	763	1076	569	470	612	594	512	1791	1706	1713	1781	1585	977	1493	1200	1378	1235	1946	2081	2120	2494	2220	307	297	431	363	262	3176	4035	2270	2440	2988
1655	Metabolite_1655	0.93	206.102	FALSE		601	857	659	779	564	617	637	616	648	617	489	543	467	509	401	838	928	1270	1107	954	1668	1888	1577	1526	1534	585	442	474	503	566	580	688	596	571	530
1656	Metabolite_1656	0.97	206.104	FALSE		599	726	663	779	546	597	637	616	600	574	489	543	467	509	401	918	867	930	906	954	1593	1454	1459	1572	1478	578	442	474	503	566	580	510	535	589	608
1657	Metabolite_1657	2.84	206.102	FALSE		7340	8277	7675	7461	7016	2751	2821	2868	3486	3109	4253	4747	4076	4824	4259	3443	3232	3265	3364	3282	2772	2361	2581	3150	2538	6498	4567	5347	4900	4950	1966	1967	2031	1783	2407
1658	Metabolite_1658	10.26	206.199	FALSE		726	733	590	756	890	641	522	535	724	730	571	273	354	368	371	452	461	489	743	519	93	116	72	141	97	74	91	71	71	70	1887	2445	2191	2912	2793
1659	Metabolite_1659	10.27	206.198	FALSE		726	733	545	910	890	898	522	535	724	730	571	273	354	368	371	452	461	489	743	735	93	116	72	141	97	74	91	71	71	70	1875	2445	2189	2912	2793
1660	Metabolite_1660	10.65	206.199	FALSE		768	633	684	1014	840	914	529	698	646	579	343	245	318	296	346	288	325	395	596	465	106	81	65	155	72	72	47	74	74	43	1462	1859	2140	2203	1846
1661	Metabolite_1661	0.8	206.888	TRUE	122.92327:637 124.92428:16 206.89114:22	29971	33625	33448	31903	31133	30088	31416	29816	33011	32692	37490	38102	38201	35558	36746	17485	16260	16218	17475	16739	13955	14705	13428	16139	15079	608	638	576	476	553	29204	29167	27521	27164	27884
1662	Metabolite_1662	2.31	207.031	FALSE		230	173	175	195	170	266	269	250	309	332	285	238	372	251	320	735	908	783	884	843	1063	1174	938	1195	1022	415	395	314	430	472	243	467	313	293	377
1663	Metabolite_1663	3.37	207.074	FALSE		336	375	335	319	325	538	478	365	565	458	159	200	193	237	138	921	361	857	505	762	415	394	493	435	363	205	227	148	268	234	909	928	991	756	772
1664	Metabolite_1664	2.89	207.067	FALSE		181	209	213	265	183	212	215	258	315	316	296	243	264	275	235	495	637	542	771	586	1200	1118	1099	1233	1104	365	385	364	342	321	209	177	166	164	223
1665	Metabolite_1665	4.09	207.085	FALSE		272	212	242	322	240	208	245	226	259	265	327	318	493	412	265	444	439	514	481	418	582	607	517	609	476	332	287	350	296	281	447	965	683	396	823
1666	Metabolite_1666	3.29	207.101	FALSE		118	173	182	134	157	168	148	126	144	143	200	190	190	185	174	763	799	776	770	785	494	595	478	773	510	478	367	418	440	354	149	208	125	156	154
1667	Metabolite_1667	3.84	207.104	FALSE		499	459	463	356	345	410	374	367	288	343	1446	1508	1228	1494	1186	4226	4024	3849	3836	4145	2638	2538	2892	3171	2547	1773	2366	1493	2139	1922	611	742	674	640	1113
1668	Metabolite_1668	11.05	207.103	TRUE	105.06612:54 111.11211:18 115.05333:16 121.06181:77 123.08176:17 134.06606:30 137.06313:17 138.07027:44 146.06837:24 147.11867:16 163.07445:19 167.06351:37 167.07314:38 179.08394:17 191.07126:73 192.07784:16 205.2104:16 207.0878:20 207.10342:309	1684	1023	931	1528	1769	547	472	363	430	480	169	160	238	236	166	155	258	152	172	131	142	189	91	135	233	200	258	194	119	115	9439	8535	6170	6885	9077
1669	Metabolite_1669	4.34	207.106	TRUE	95.09122:22 129.05405:19 157.06781:16 161.061:16 161.06975:46 161.10149:41 162.06511:18 177.06325:22 189.09808:36 205.08302:21 207.07153:23 207.11351:25	202	203	261	227	156	334	258	393	310	323	364	443	326	323	275	873	1035	911	1091	1030	942	1150	936	1006	930	369	269	278	247	313	611	571	481	496	437
1670	Metabolite_1670	3.71	207.104	TRUE	148.77914:19 149.58139:16 161.05829:24 207.05574:16	459	512	502	362	348	265	270	215	199	249	447	440	230	405	309	1236	1806	1710	1143	1882	1927	1129	2110	2395	2023	769	668	605	646	730	441	431	385	407	686
1671	Metabolite_1671	2.83	207.102	FALSE		924	848	833	969	755	465	496	419	403	383	674	576	494	781	434	495	375	623	610	454	301	367	373	558	337	604	573	693	662	597	302	309	265	265	363
1672	Metabolite_1672	4.25	207.105	TRUE	69.03137:28 105.07546:16 161.06572:29 161.09009:16 161.09798:39 163.11194:17 168.07831:16 168.10811:18 177.01624:25	202	203	261	227	156	334	258	393	310	283	364	443	326	323	275	894	1230	978	1130	997	954	1156	993	1011	1023	369	1138	278	231	260	689	617	498	496	454
1673	Metabolite_1673	4.09	207.14	TRUE	95.09012:23 97.18309:25 105.06714:56 107.08186:17 119.06971:16 120.07224:17 120.08456:24 125.09706:18 135.11563:23 149.09583:36 151.07198:16 191.10762:21 206.08763:18 207.13837:17	289	254	271	317	291	533	456	480	571	578	417	379	382	349	340	2457	2401	2443	2295	2241	2096	1959	2283	2531	2098	1572	1156	1042	1491	1191	742	711	489	570	968
1674	Metabolite_1674	3.56	207.14	TRUE	68.06476:31 97.97181:17 109.10777:20 119.08601:19 119.09315:22 121.10963:18	240	259	280	333	324	838	818	992	922	903	249	340	262	293	269	1805	1907	1801	1749	1861	2583	2582	2816	2855	2507	1127	1039	887	865	1099	889	884	682	633	786
1675	Metabolite_1675	4.89	207.138	FALSE		275	235	240	275	248	240	213	200	371	232	574	513	485	571	518	356	353	338	353	334	272	265	321	233	303	97	91	108	127	92	133	181	161	205	222
1676	Metabolite_1676	5.01	207.156	FALSE		789	778	591	614	484	597	640	639	588	435	517	622	585	659	516	632	530	545	809	494	655	529	578	630	676	596	444	579	468	613	555	440	540	571	581
1677	Metabolite_1677	0.83	207.208	FALSE		2420	2687	2541	2628	2282	2215	1972	2126	2182	1983	2048	2227	2015	2011	2081	1438	1410	1623	1543	1574	762	644	785	926	738	588	419	223	395	391	1683	1308	1880	1755	1985
1678	Metabolite_1678	0.8	207.889	FALSE		658	743	895	851	984	706	665	839	726	1053	1062	1137	1066	1069	755	501	507	635	640	532	364	429	399	473	438	26	58	40	34	49	715	911	903	793	755
1679	Metabolite_1679	2.9	208.038	FALSE		247	280	269	238	180	232	285	328	282	281	556	714	670	575	597	773	736	937	740	745	822	638	945	667	794	1030	963	899	1127	1042	310	453	281	300	409
1680	Metabolite_1680	10.23	208.061	FALSE		279	497	478	290	208	534	341	704	537	558	94	98	171	116	106	99	118	61	77	89	49	88	54	80	95	72	111	79	48	79	105	156	126	166	115
1681	Metabolite_1681	10.78	208.062	FALSE		135	112	88	102	117	108	121	111	97	181	69	42	80	92	58	54	73	60	157	31	33	63	39	68	91	63	67	35	72	60	661	531	519	580	450
1682	Metabolite_1682	1.87	208.063	FALSE		370	416	419	348	272	313	186	244	315	161	630	593	646	644	567	552	534	509	416	631	671	591	587	732	623	457	256	232	271	252	167	191	155	151	185
1683	Metabolite_1683	0.97	208.071	FALSE		325	397	302	361	287	265	305	311	348	321	522	632	618	641	572	188	144	244	140	258	128	139	157	215	157	281	301	178	272	222	201	314	274	236	250
1684	Metabolite_1684	3.84	208.104	FALSE		142	75	82	97	159	81	144	121	140	107	267	319	244	315	342	684	603	676	637	663	482	425	580	679	511	480	373	302	412	480	127	142	145	138	160
1685	Metabolite_1685	11.06	208.108	FALSE		278	131	176	242	383	195	143	128	123	168	80	81	97	67	85	88	79	68	91	72	109	80	93	75	71	97	108	103	104	80	1464	1112	1069	961	1443
1686	Metabolite_1686	0.8	208.884	FALSE		7115	7635	7373	6632	6875	7227	7475	6508	7386	7226	8486	8431	8334	7969	8692	4484	3788	4097	3958	3905	3064	3611	3009	3801	3731	221	224	194	178	179	6576	6526	6218	6155	6404
1687	Metabolite_1687	0.83	208.975	TRUE	104.10816:65 147.06075:16 191.94736:29 208.97543:112	19141	21234	18873	17899	18808	6459	6702	6050	7341	6678	37931	38732	36971	37024	36555	2943	2526	2612	2960	2804	1051	1156	877	1261	1112	227	241	194	168	188	3799	4193	3367	3375	5986
1688	Metabolite_1688	3.12	209.038	FALSE		294	203	202	296	237	169	148	131	141	105	681	810	646	806	673	755	758	700	849	710	1655	1904	2101	2041	1755	434	371	425	322	374	372	411	221	345	457
1689	Metabolite_1689	2.28	209.056	FALSE		1390	2093	1817	1398	1320	811	701	750	947	780	5649	6510	5813	4698	5022	1568	1301	1330	1562	1516	2116	2275	1618	2202	1913	570	309	383	365	378	848	1054	981	633	1092
1690	Metabolite_1690	2.89	209.047	TRUE	124.96195:17 125.05401:21 133.02318:16 134.03575:30 160.94922:19 162.03113:19 166.02443:18 177.02089:53 181.0426:18 181.05016:16 191.03607:21 194.0229:16 209.0376:33	1092	1100	1154	1052	993	981	1069	989	1159	920	3558	4204	3921	4025	3888	13842	15452	13599	14887	13771	22195	23534	23717	24987	23577	7487	6598	6431	7333	6272	3287	2178	2044	2415	2766
1691	Metabolite_1691	2.11	209.047	TRUE	65.03493:23 99.04676:17 107.01301:62 108.05468:20 120.77096:18 121.03143:20 127.98481:16 133.02682:17 148.01514:16 149.01764:17 149.02512:21 150.02449:21 150.03331:22 165.04915:21 166.02531:64 177.01614:67 181.0338:35 181.04617:83 181.05385:59 191.99228:20 194.01343:16 194.02545:44 195.02162:21 195.03149:18 209.02557:18 209.04373:406	15752	16557	17225	14621	13750	7394	6783	6269	8335	7087	44814	48828	45771	45584	43691	15147	14472	13844	14694	14370	19485	18823	18058	21473	18396	1734	1327	1304	1559	1551	7902	8212	7829	6946	12146
1692	Metabolite_1692	3.96	209.046	TRUE	139.03487:20 150.02939:24 162.48509:18 164.04411:20 190.02748:20 209.02943:44 209.0425:125 209.06841:16	201	169	191	122	142	155	201	143	196	127	313	237	371	324	295	255	248	313	247	279	365	418	442	416	403	128	136	263	128	196	3418	2667	2485	2656	3488
1693	Metabolite_1693	3.29	209.046	TRUE	127.03352:20 128.17787:16 166.01642:23 177.00874:27 181.03879:16 195.02444:29 209.03093:18 209.045:88	1060	1159	1092	913	1077	364	480	321	412	392	2947	3522	3139	3449	3081	1562	1736	1355	1480	1406	1373	1451	1646	1756	1330	561	329	375	411	327	1996	2152	1768	1958	2310
1694	Metabolite_1694	4.95	209.048	FALSE		77	137	94	95	71	72	97	151	80	112	101	112	120	107	67	354	304	361	306	264	716	824	715	853	825	159	102	109	159	171	125	164	83	104	126
1695	Metabolite_1695	9.49	209.074	FALSE		629	885	994	965	895	1539	689	992	964	1118	162	137	278	161	117	199	485	172	140	141	170	163	78	197	181	140	183	116	116	122	3546	3573	1076	1887	1284
1696	Metabolite_1696	11.99	209.082	FALSE		1135	1005	558	751	951	810	714	469	798	774	154	211	291	184	222	308	304	169	353	334	203	156	173	396	154	273	159	150	121	101	1255	1492	1277	1426	1060
1697	Metabolite_1697	11.58	209.082	TRUE	105.07562:66 135.08205:20 191.07254:42 209.07768:20 209.08653:26	1802	1955	1425	1869	920	901	1217	1026	2139	928	319	554	1368	467	508	829	1715	609	975	670	375	407	211	1563	267	370	132	183	274	153	9280	10638	8707	9380	11993
1698	Metabolite_1698	5.65	209.082	TRUE	95.05363:29 109.10288:20 148.04871:16 164.01404:16 168.07494:16	134	362	203	399	211	188	162	160	192	252	212	144	433	239	143	290	652	413	493	360	352	354	255	511	371	317	354	288	248	307	332	306	236	325	302
1699	Metabolite_1699	9.91	209.082	TRUE	121.58369:22 130.93237:21 163.07422:17 191.0694:25 209.07393:83	204	329	430	292	317	388	268	467	472	520	150	108	222	142	127	157	240	162	120	149	143	117	127	205	214	137	181	100	68	116	982	1448	656	811	545
1700	Metabolite_1700	12.1	209.081	FALSE		1216	999	563	848	1277	1213	846	571	591	644	142	193	308	184	222	308	304	169	337	350	203	153	100	396	154	204	239	110	121	124	1719	1844	1662	2028	1548
1701	Metabolite_1701	11.54	209.082	TRUE	79.0318:20 105.06883:16 106.07595:48 120.06049:24 131.04536:20 133.06792:17 161.04816:93 161.05621:45 163.07224:35 167.1031:18 181.07713:16 191.05537:17 191.06859:71 191.0835:20 209.0652:20 209.07986:402 209.09111:67	1195	1645	1154	1563	1521	1072	1120	911	1929	1335	319	554	1474	467	508	873	1541	609	1110	853	375	407	211	1686	267	370	132	183	274	153	9183	9801	8706	9929	11000
1702	Metabolite_1702	8.28	209.083	TRUE	67.05511:20 107.08156:17 135.07947:16 136.08765:43 163.08174:25 163.0876:16 209.07613:43 209.08493:63	175	1113	702	325	744	496	373	1069	667	468	189	163	244	138	131	407	919	1040	259	359	459	260	200	274	545	228	263	1036	132	284	1650	2376	678	1482	883
1703	Metabolite_1703	11.02	209.081	FALSE		775	1033	658	679	1293	694	523	411	943	593	183	259	780	246	269	404	666	278	321	961	186	300	206	763	388	221	259	203	187	165	3924	16462	3911	15374	3980
1704	Metabolite_1704	10.53	209.08	FALSE		2032	1199	958	1193	1375	2147	708	1021	1071	1294	151	202	436	159	153	140	452	163	143	172	222	149	81	235	204	112	140	144	70	187	967	28233	9293	14748	10356
1705	Metabolite_1705	7.84	209.077	TRUE	58.21967:46 105.0716:18 122.15849:16 126.06805:17 135.07951:22 149.02388:20 161.0573:16 179.07152:26 191.11111:38 209.07202:98	896	1010	1275	1380	854	1611	1031	1809	733	1989	394	196	714	637	818	938	673	516	494	678	262	392	463	251	900	680	359	676	690	411	4553	6257	2676	3502	3214
1706	Metabolite_1706	11.2	209.081	FALSE		522	529	353	493	625	409	339	375	401	520	171	180	369	188	116	192	356	152	185	240	155	269	167	327	253	199	206	152	187	173	2748	2823	2237	2501	2693
1707	Metabolite_1707	10.65	209.083	TRUE	151.04568:21 162.05074:27 163.07295:28 173.05505:20 173.06726:20 191.06625:20 191.07916:42 209.08414:127	3944	5187	4821	5237	8613	5375	3925	4753	5097	5896	420	291	1058	234	476	315	796	267	441	373	170	230	113	638	325	217	205	124	96	187	44364	56242	37147	44922	21940
1708	Metabolite_1708	10.88	209.083	TRUE	103.04835:16 191.07013:27 209.06827:29 209.08612:38	3243	3870	1966	3415	4298	2980	3189	2046	3513	2930	575	995	3414	518	720	1355	3081	990	1174	852	620	342	206	2767	541	250	250	307	179	234	32849	36847	31215	31584	30257
1709	Metabolite_1709	8.14	209.082	TRUE	127.04977:40 163.0809:20 209.07117:19 209.08333:22	159	855	823	487	897	265	299	1110	746	275	301	128	244	118	184	740	1132	539	197	326	296	187	124	172	506	195	268	625	254	256	1290	1605	492	787	681
1710	Metabolite_1710	2.27	209.082	FALSE		150	105	127	127	103	113	103	161	149	113	143	145	144	241	156	737	1026	914	755	944	1764	1741	1575	1874	1541	627	432	383	354	391	272	225	200	194	339
1711	Metabolite_1711	3.87	209.081	FALSE		338	389	347	347	389	279	351	228	182	217	373	288	371	307	430	638	603	693	528	575	787	861	820	763	835	416	397	428	413	377	346	244	285	372	341
1712	Metabolite_1712	8.98	209.083	TRUE	68.99528:36 77.04156:17 83.01017:83 91.05216:36 95.04717:73 95.05344:19 95.0855:32 105.06718:37 115.062:46 117.06517:17 117.07246:18 119.04847:20 121.06303:54 123.04459:17 127.05136:16 135.03606:19 135.04788:17 135.08109:16 145.05772:16 148.05765:22 149.05937:53 150.05612:20 151.03822:33 155.02757:17 163.06322:70 163.07225:144 163.08859:42 164.08237:37 171.52972:33 173.06233:41 175.03215:18 176.0…	42343	46358	41539	48516	64505	26752	20220	23321	25220	26457	1929	1034	2078	1171	2122	756	1563	918	1375	1030	281	377	158	981	412	300	154	221	156	200	156532	161767	122727	146673	113035
1713	Metabolite_1713	7.24	209.086	FALSE		215	762	632	333	321	198	504	442	682	258	131	125	278	136	264	488	247	794	191	724	120	216	265	161	280	208	280	239	164	194	475	491	326	537	444
1714	Metabolite_1714	11.32	209.082	FALSE		220	215	181	195	190	155	128	103	199	190	120	176	242	109	116	174	262	111	136	185	139	160	233	279	201	213	115	156	139	173	1767	1122	1567	1326	1365
1715	Metabolite_1715	9.45	209.083	TRUE	103.05491:38 105.06693:22 106.07424:17 147.03609:25 161.06004:26 164.08479:22 171.56801:17 179.06775:38 183.25571:25 191.06973:80 191.08105:57 209.07597:314 209.08218:134 209.19296:17	569	830	942	712	643	1242	565	1012	794	989	162	114	241	148	117	143	485	140	132	117	118	152	81	143	181	108	150	99	140	113	3603	3862	1060	1669	1201
1716	Metabolite_1716	11.75	209.081	FALSE		1261	725	475	588	707	730	630	451	522	725	109	147	421	152	168	194	337	141	216	243	134	152	156	529	155	198	102	88	95	184	3961	3263	3294	3899	3160
1717	Metabolite_1717	7.36	209.089	TRUE	122.07484:23 152.95061:34 191.07503:18	215	744	590	306	178	140	485	501	569	258	176	158	185	144	280	513	367	913	204	830	133	394	311	161	290	208	217	162	236	168	460	410	326	450	395
1718	Metabolite_1718	6.46	209.088	FALSE		153	178	457	662	116	132	155	247	469	324	254	113	170	115	191	162	279	231	173	277	107	373	459	195	523	298	328	243	174	249	210	363	233	164	169
1719	Metabolite_1719	8.82	209.083	TRUE	209.09323:21	21687	18013	19778	20796	20359	14794	8704	10114	9591	9042	676	641	1014	973	647	591	1141	491	370	623	187	200	106	983	361	358	220	212	111	132	53871	52580	58901	65303	61997
1720	Metabolite_1720	9.96	209.086	TRUE	105.07267:90 147.12306:17 161.06114:18 180.08484:17 201.74767:20 209.07315:55 209.09605:87	204	329	430	296	294	367	268	451	455	520	100	156	222	167	127	161	240	210	109	149	86	105	106	205	195	137	159	115	60	116	1093	1256	688	758	724
1721	Metabolite_1721	8.67	209.087	TRUE	163.08209:44 191.07884:64	169	835	287	302	265	184	315	216	923	855	124	907	1073	223	105	980	1145	276	102	307	711	359	205	1335	733	172	220	268	141	162	293	468	215	272	161
1722	Metabolite_1722	8.49	209.083	FALSE		245	372	310	245	278	265	286	371	572	547	277	692	228	157	126	684	438	1000	126	250	944	304	206	163	979	215	369	913	107	216	307	602	239	837	295
1723	Metabolite_1723	4.78	209.083	TRUE	103.05043:21 122.10181:18 128.96034:17 145.03177:24 149.06186:16 163.07454:18 177.06108:20 177.06746:18 209.08392:39	441	507	492	574	670	267	268	338	510	351	482	350	485	535	418	815	1123	1066	1044	1026	336	328	295	405	489	1297	744	807	852	650	651	941	881	876	1138
1724	Metabolite_1724	2.84	209.093	FALSE		543	571	625	641	562	691	731	675	723	648	589	833	617	640	832	685	526	683	463	682	456	401	525	526	454	686	733	689	725	778	506	398	513	621	479
1725	Metabolite_1725	7.67	209.085	FALSE		596	758	823	1198	615	1240	616	1166	762	1047	297	159	272	161	189	183	783	535	332	679	76	291	220	215	802	161	193	122	262	151	2669	3380	1333	1932	2089
1726	Metabolite_1726	3.45	209.119	TRUE	71.0507:46 79.05752:33 91.05401:18 93.06293:17 128.05893:16 129.06937:32 136.11661:20 145.06508:17 150.1015:19 165.08987:47 168.06848:33 191.11917:18 209.1183:84	3735	4123	3811	4015	3636	3830	3411	3409	3647	3615	380	369	454	513	333	1459	1453	1811	1728	1901	900	882	1127	985	1066	1576	1532	1116	1188	1434	449	638	444	496	627
1727	Metabolite_1727	4.13	209.119	TRUE	95.05065:16 109.03091:18 119.08414:20 129.0647:17 146.01913:30 153.09576:16 163.1456:25 169.97719:27 180.04936:16 192.10663:16 208.13428:34	340	355	340	254	329	346	322	234	228	242	566	713	523	765	494	2556	2636	2556	2672	2624	1843	1931	1827	2141	1913	856	933	690	902	772	430	439	319	370	497
1728	Metabolite_1728	3.86	209.12	TRUE	121.06607:16 128.94772:18 131.08182:39 149.05092:45 191.10406:24 191.11096:16 209.11511:21	3246	3423	3112	3087	3023	1905	1680	1602	1770	1724	349	447	336	398	318	560	757	500	537	533	507	2456	402	306	420	245	281	223	212	205	423	472	408	376	816
1729	Metabolite_1729	3.62	209.121	TRUE	94.07153:18 121.10324:17 121.63076:16 122.10082:23 145.09296:38 149.12962:25 173.12904:16 177.05266:20 191.10963:23 209.10768:16	787	976	904	879	917	1314	623	718	826	704	373	442	349	513	359	1249	8573	1462	1331	1395	760	774	842	885	916	1188	1387	1361	1750	1815	435	469	421	436	649
1730	Metabolite_1730	3.35	209.119	TRUE	105.06667:21 107.00736:70 126.95752:17 131.08788:18 153.01405:18 166.08606:19 191.10713:28 192.10403:16 209.11397:16	3800	4149	1635	4199	3749	3767	1258	3530	1477	3518	155	165	150	160	230	682	655	688	532	576	607	615	624	732	623	622	406	382	518	413	649	657	493	496	647
1731	Metabolite_1731	3.55	209.154	FALSE		1478	2122	1530	2029	1487	5216	3872	4155	4746	4000	1318	1357	1524	1456	1404	8357	592	7641	8303	7531	5453	7557	1098	1036	6830	5561	5078	4580	4065	5625	2598	3513	2148	2120	621
1732	Metabolite_1732	11.47	209.152	FALSE		307	211	180	251	229	307	193	178	342	326	133	169	151	138	284	143	153	188	172	150	159	131	188	133	106	131	99	146	119	136	676	574	492	619	598
1733	Metabolite_1733	3.82	209.156	TRUE	144.09328:16 153.03178:16 208.11475:17 209.15807:19	489	235	226	204	210	1397	1572	1545	1908	1787	186	345	216	236	208	1674	1827	750	818	952	1391	1528	1213	2735	2304	802	464	713	448	493	334	362	244	249	317
1734	Metabolite_1734	3.53	209.156	TRUE	93.06813:33 97.06282:20 97.10496:31 107.09286:33 121.10026:19 123.08523:20 125.09821:42 127.03738:17 166.04515:16 192.15817:20 209.14923:20	2026	2166	1524	1648	1422	4806	4104	4495	4803	4789	1413	1832	1428	1751	1410	9026	9468	8720	8963	8827	7710	7915	8326	9326	7406	5553	5199	4715	4540	5845	3110	3304	2894	2625	4284
1735	Metabolite_1735	4.09	209.155	TRUE	113.98517:22 125.08997:55 149.05861:46 209.0396:87	1136	1115	839	932	1124	906	1105	1057	1189	1023	1626	1997	1855	2247	1878	1109	1247	999	1151	1411	620	436	457	602	505	243	216	220	221	245	1249	1411	986	1060	1956
1736	Metabolite_1736	4.02	209.155	TRUE	150.10426:33 181.04718:16	1141	907	729	912	748	1043	994	980	1149	996	1230	1235	1269	1251	1063	568	698	935	738	658	620	455	509	675	539	243	216	186	221	245	1080	1642	861	958	1986
1737	Metabolite_1737	11.32	209.156	FALSE		420	126	214	111	165	214	160	160	601	216	210	265	217	200	925	429	199	251	405	311	229	320	571	460	213	206	187	241	202	185	506	287	635	450	510
1738	Metabolite_1738	0.84	209.957	FALSE		1122	1710	1428	1186	1324	576	737	583	659	696	2292	2383	2310	2647	2468	270	229	280	280	258	168	201	163	338	262	134	107	104	91	80	674	742	710	663	557
1739	Metabolite_1739	2.13	210.05	FALSE		1979	2120	2291	2037	1332	1120	956	1065	599	1003	5510	6247	5758	6181	5759	2012	1773	1806	1936	2047	2155	2608	1922	2920	2106	228	193	278	242	330	1421	1400	1054	1013	1626
1740	Metabolite_1740	2.89	210.049	FALSE		209	195	171	163	138	188	209	203	215	151	582	658	486	575	555	1787	1900	1754	2203	1773	2941	3047	3029	3122	2811	996	820	941	994	917	624	346	379	484	429
1741	Metabolite_1741	9.05	210.084	FALSE		5544	6089	5631	6536	7687	3541	3044	3117	3763	3797	382	201	503	371	379	156	260	150	237	253	95	120	76	276	110	93	61	51	100	52	874	19625	15601	18387	14831
1742	Metabolite_1742	10.65	210.084	FALSE		755	786	804	724	1221	857	662	704	991	665	106	82	203	66	196	73	171	127	105	126	46	120	68	176	94	67	59	53	57	53	5620	7402	4795	6209	2578
1743	Metabolite_1743	8.97	210.084	FALSE		5579	5705	5206	6146	7213	3541	2343	2646	2312	3303	382	201	503	371	379	170	260	167	237	253	95	120	76	276	110	93	72	105	131	52	18414	19890	13924	17855	14714
1744	Metabolite_1744	7.81	210.083	FALSE		234	237	306	233	225	306	211	326	279	346	103	98	169	223	188	159	177	169	153	107	73	99	197	111	243	223	119	165	236	78	840	747	468	660	536
1745	Metabolite_1745	10.89	210.086	FALSE		706	586	358	497	684	413	581	455	449	598	111	194	439	75	167	300	535	168	230	177	129	97	97	357	99	82	99	92	94	73	4405	4771	4459	4159	4131
1746	Metabolite_1746	11.53	210.085	FALSE		271	302	210	364	263	208	173	212	560	137	118	142	299	107	131	175	247	136	216	124	81	109	70	297	73	123	51	80	67	51	1369	1025	1480	919	1737
1747	Metabolite_1747	9.48	210.093	FALSE		145	262	229	172	170	213	121	304	223	271	72	69	92	51	64	49	93	48	84	72	102	132	98	123	161	56	58	69	62	29	654	619	240	317	243
1748	Metabolite_1748	3.47	210.135	FALSE		676	646	685	666	601	1044	756	897	826	975	366	372	362	317	233	1424	1392	1387	1841	1419	1508	1486	1438	1598	1525	992	906	824	627	1074	565	659	458	593	714
1749	Metabolite_1749	11.1	210.149	FALSE		186	169	198	216	214	225	210	158	184	171	91	108	97	94	120	117	89	98	129	121	94	115	71	56	77	88	77	81	88	111	1827	2080	1551	2143	1244
1750	Metabolite_1750	3.55	210.158	FALSE		568	577	353	342	358	839	773	654	629	811	365	344	339	335	273	1186	1355	1387	1280	986	1384	1438	1453	1439	1428	1143	786	859	668	982	718	659	595	593	711
1751	Metabolite_1751	0.81	210.881	FALSE		557	756	776	617	633	628	644	533	733	558	761	836	738	625	731	426	330	428	534	404	299	329	332	394	303	54	41	36	34	50	560	568	533	863	523
1752	Metabolite_1752	0.83	210.971	FALSE		3155	3034	2891	2610	2746	867	1242	996	1092	998	5607	5914	5392	5699	5117	500	554	577	495	746	237	301	219	355	271	55	111	72	93	81	784	735	631	556	788
1753	Metabolite_1753	2.89	211.024	FALSE		138	131	147	147	92	141	106	109	126	105	263	268	187	315	240	984	950	735	881	773	1238	1374	1590	1451	1345	333	403	469	337	356	207	237	131	213	155
1754	Metabolite_1754	1.83	211.025	FALSE		873	995	942	790	879	762	1086	969	1081	1050	1001	967	1002	985	829	139	174	163	191	107	281	222	264	209	189	110	121	83	64	75	825	617	587	593	717
1755	Metabolite_1755	2.12	211.024	FALSE		541	450	369	317	381	466	277	206	345	290	1251	1158	1461	1072	1181	412	308	347	541	532	601	552	472	765	601	119	101	117	153	145	314	283	265	244	268
1756	Metabolite_1756	2.13	211.049	FALSE		462	411	445	392	539	344	186	253	371	238	1068	1379	960	1093	1198	398	460	382	528	502	601	767	535	784	556	175	246	192	199	223	436	366	268	231	480
1757	Metabolite_1757	7.76	211.063	FALSE		159	212	141	185	189	173	200	141	134	175	101	122	84	77	127	82	69	77	64	76	46	75	57	64	90	67	66	100	90	73	1086	1048	907	696	1201
1758	Metabolite_1758	6.28	211.063	TRUE	90.67397:16 96.95803:17 107.05098:16 151.04306:17 194.05307:16 197.04655:16 211.05809:117 211.07222:34	942	1980	2251	1549	941	2052	1026	3366	1354	2502	258	276	165	194	107	203	143	216	155	168	63	89	69	109	91	80	73	75	75	104	1434	1881	1758	2015	1484
1759	Metabolite_1759	1.8	211.066	FALSE		325	401	311	422	390	266	307	232	304	287	228	332	279	260	227	396	248	310	266	310	241	217	266	253	273	212	173	180	172	193	657	607	711	514	890
1760	Metabolite_1760	2.97	211.06	FALSE		484	609	520	472	488	408	266	369	383	292	242	317	260	252	225	494	660	564	761	530	1112	1220	1186	1203	978	301	226	249	299	302	722	552	555	619	643
1761	Metabolite_1761	6.38	211.067	FALSE		930	2027	2231	1420	942	2143	1241	3003	1906	2342	175	219	127	194	107	200	143	139	126	168	78	154	69	156	147	126	91	69	81	68	1592	1815	1976	2108	1570
1762	Metabolite_1762	10.65	211.084	FALSE		174	196	178	263	353	169	134	203	186	263	131	64	92	102	77	84	191	176	138	183	82	98	70	82	169	174	158	77	60	145	884	1096	753	710	452
1763	Metabolite_1763	8.99	211.087	FALSE		800	955	753	869	1240	622	507	692	610	638	130	67	160	123	109	79	133	163	79	162	93	75	95	77	176	120	112	52	63	107	2666	2820	2128	2511	2080
1764	Metabolite_1764	8.95	211.087	FALSE		528	721	699	693	1060	638	507	709	610	638	130	67	160	123	109	87	133	128	79	162	60	74	95	77	125	111	82	52	94	107	2710	2215	1851	2869	1489
1765	Metabolite_1765	2.43	211.095	FALSE		431	485	408	508	677	329	294	269	310	221	338	348	378	371	269	533	569	594	637	563	801	710	673	840	702	485	325	326	324	238	257	260	213	289	371
1766	Metabolite_1766	9.24	211.1	FALSE		217	351	219	346	293	230	226	251	254	258	72	59	90	65	103	139	113	152	93	124	116	103	75	55	140	81	102	65	84	101	720	617	800	1052	1046
1767	Metabolite_1767	11.26	211.097	FALSE		149	101	111	143	191	196	132	109	124	137	82	108	124	88	97	171	149	135	109	159	117	92	124	179	169	113	123	145	119	121	756	970	886	990	917
1768	Metabolite_1768	4.35	211.095	FALSE		99	169	138	164	134	174	176	116	177	144	148	155	107	283	162	375	348	334	367	372	677	432	389	426	468	149	155	137	136	144	187	243	180	229	274
1769	Metabolite_1769	2.66	211.098	TRUE	137.07156:78 138.07043:16 142.96822:20 146.94215:17 192.07288:24 193.05272:34 210.13896:20	201	287	275	252	303	218	101	143	162	137	151	133	176	171	222	579	500	485	493	437	1205	1392	1221	1582	1350	1354	1406	978	1468	652	94	91	144	113	124
1770	Metabolite_1770	3.16	211.097	FALSE		218	285	158	241	233	204	211	196	235	202	168	165	160	196	186	127	143	158	189	222	200	194	187	298	219	106	115	108	83	99	2005	1508	1521	1499	1717
1771	Metabolite_1771	3.93	211.099	TRUE	165.08186:20 167.06831:80 179.0601:30 193.0788:21 193.09653:39	270	282	280	273	420	237	165	156	219	172	272	311	311	306	259	1109	1127	1077	1201	912	2331	2254	2236	2445	2008	301	386	378	376	408	460	414	361	470	437
1772	Metabolite_1772	5.02	211.099	TRUE	67.05574:19 120.94016:16 154.08391:37 155.0482:21 167.0731:19 178.06125:19	595	750	674	698	751	598	596	726	793	627	168	161	145	232	204	350	351	574	325	310	368	376	377	585	439	190	158	118	173	112	957	706	762	773	1048
1773	Metabolite_1773	7.27	211.099	TRUE	67.05257:20 105.07043:23 105.07712:16 107.08344:17 135.07358:42 161.06293:22 169.08588:36 177.0537:18 178.06253:21 193.08766:175 211.09523:411	363	301	252	340	407	248	207	158	241	182	83	83	91	86	90	97	132	92	78	114	82	70	89	251	99	89	140	82	60	82	10073	10717	9070	10062	9863
1774	Metabolite_1774	10.17	211.099	TRUE	122.07158:22 211.09476:27	88	128	87	207	88	120	113	105	139	104	148	89	75	83	102	131	146	157	119	190	85	95	92	83	121	81	144	87	69	78	1162	1291	880	1200	802
1775	Metabolite_1775	10.84	211.098	TRUE	211.09898:49	1363	1906	1452	2198	2183	1390	1149	1078	1036	1280	160	146	215	297	151	179	290	292	171	324	117	150	131	247	191	167	167	132	118	113	8644	8560	7033	8089	6922
1776	Metabolite_1776	11.02	211.096	FALSE		1097	724	536	666	901	583	505	487	614	599	250	166	247	175	165	225	318	316	265	327	139	233	161	234	182	267	258	192	166	134	1677	1450	1639	1791	1579
1777	Metabolite_1777	3.28	211.096	FALSE		168	169	147	203	188	156	138	157	161	158	164	242	151	177	268	432	551	483	584	532	598	599	654	700	799	508	526	445	407	334	755	674	553	700	830
1778	Metabolite_1778	4.21	211.097	FALSE		221	256	241	289	205	147	262	224	173	220	102	128	111	106	108	349	292	315	296	341	308	412	489	425	295	236	192	196	143	188	588	726	495	680	690
1779	Metabolite_1779	4.47	211.096	FALSE		186	159	131	164	134	174	124	156	244	169	179	152	216	1051	188	502	348	293	382	416	353	403	387	423	486	295	218	206	198	226	161	185	183	161	439
1780	Metabolite_1780	5.36	211.099	TRUE	195.0927:17 211.09706:92	539	531	470	652	522	529	563	451	494	553	184	156	235	147	205	278	287	283	261	264	391	412	334	498	412	157	131	133	115	148	2787	1915	2232	2398	2714
1781	Metabolite_1781	2.88	211.097	FALSE		168	174	145	138	102	129	115	159	125	107	83	198	105	143	138	270	241	270	284	323	428	702	438	368	386	194	248	183	153	173	400	238	287	313	272
1782	Metabolite_1782	4.46	211.1	FALSE		186	170	131	164	152	174	130	136	244	169	157	152	216	903	175	502	326	316	382	416	358	416	434	400	486	295	218	206	198	221	177	208	201	219	439
1783	Metabolite_1783	11.17	211.096	FALSE		335	248	282	314	455	250	248	178	268	233	176	140	247	139	107	188	199	132	126	187	139	156	135	179	207	177	168	143	130	117	1285	1549	1044	1081	902
1784	Metabolite_1784	5.72	211.101	FALSE		557	466	578	544	653	486	428	450	530	509	110	117	99	136	95	254	267	198	235	205	310	252	327	399	369	117	90	157	108	118	759	588	638	795	869
1785	Metabolite_1785	6.4	211.136	FALSE		960	1106	969	1098	958	403	282	365	246	271	329	431	431	402	394	99	101	63	73	106	102	123	125	102	111	119	74	87	91	93	569	483	388	439	696
1786	Metabolite_1786	3.82	211.115	FALSE		496	553	408	402	460	347	309	274	252	303	272	311	284	305	254	871	998	838	1154	1033	2187	1989	2573	2289	1797	292	236	235	220	270	375	319	386	368	362
1787	Metabolite_1787	3.54	211.134	FALSE		825	965	964	987	916	788	745	831	949	842	152	133	165	114	113	272	207	244	245	316	253	256	257	292	276	195	210	114	166	132	340	565	437	429	575
1788	Metabolite_1788	6.22	211.137	TRUE	113.05405:34 119.08566:28 211.05869:24	673	548	484	638	530	140	155	145	110	152	570	597	685	895	615	140	156	148	124	161	102	115	103	134	121	115	88	72	91	78	229	305	209	178	321
1789	Metabolite_1789	5.09	211.171	TRUE	99.94338:20 101.50867:30 109.10306:50 112.01303:18 120.08174:16 128.95195:24 137.0948:23 154.97076:16 211.15813:16	756	597	556	667	567	1260	1189	1217	1319	1213	182	268	222	183	137	217	177	159	154	129	98	177	142	112	136	100	123	90	106	121	962	791	896	623	997
1790	Metabolite_1790	5.69	211.167	FALSE		184	175	185	182	152	284	292	270	312	350	526	676	521	498	524	325	370	292	284	415	76	110	89	90	78	70	82	56	59	72	182	162	139	136	308
1791	Metabolite_1791	4.34	211.172	FALSE		648	646	626	622	626	1365	1155	1263	1398	548	617	717	638	647	671	828	748	606	732	576	578	817	645	672	733	148	218	103	154	130	297	344	301	266	408
1792	Metabolite_1792	3.72	211.168	FALSE		209	316	264	245	229	814	716	883	922	789	94	116	106	162	60	191	328	189	166	198	278	290	242	258	243	85	75	84	87	66	136	229	107	121	186
1793	Metabolite_1793	4.43	211.172	FALSE		567	585	616	622	626	1315	1093	1038	1294	1106	617	717	638	697	693	766	861	702	657	778	651	763	681	708	624	219	218	162	254	178	297	344	301	266	397
1794	Metabolite_1794	4.64	211.172	TRUE	95.08332:37 176.1505:17 176.93367:17 193.15968:110 211.07112:21	597	700	543	537	476	1494	1501	1482	1701	819	557	472	512	434	370	3775	3572	3387	3896	3858	1918	1853	1914	2290	1689	1742	1316	1491	1311	1339	1795	2271	1729	1633	2840
1795	Metabolite_1795	7.05	211.177	FALSE		673	466	400	508	387	577	572	420	580	434	507	477	579	530	662	533	431	469	863	500	376	498	562	562	407	499	456	499	456	415	562	417	599	665	456
1796	Metabolite_1796	4.78	211.181	FALSE		157	169	171	162	193	519	420	442	511	509	115	127	122	102	140	745	897	507	681	638	676	604	492	659	698	450	261	307	281	334	399	497	345	293	417
1797	Metabolite_1797	6.28	212.069	FALSE		400	865	677	574	477	785	548	1279	677	822	91	90	84	126	84	116	60	137	63	57	40	37	80	51	55	62	38	43	46	38	615	846	635	994	651
1798	Metabolite_1798	10.85	212.099	FALSE		318	382	250	386	438	434	280	258	271	373	55	59	71	51	77	55	66	61	164	100	59	80	58	71	65	73	51	91	53	69	1396	1046	902	1226	886
1799	Metabolite_1799	7.25	212.101	FALSE		89	70	69	82	142	76	54	73	88	59	72	63	56	47	64	96	81	53	55	59	58	41	43	41	69	57	80	83	83	49	1447	1225	1327	1443	1593
1800	Metabolite_1800	0.97	212.103	FALSE		1638	1667	1466	1376	1483	1125	1150	970	1088	1262	1246	1014	1012	1091	942	978	923	847	867	896	495	449	623	704	570	569	456	548	508	476	2667	2561	2467	2467	3297
1801	Metabolite_1801	5.69	212.167	FALSE		237	186	197	235	195	222	226	214	456	205	293	341	417	280	529	267	212	229	307	350	395	318	524	319	250	373	124	252	187	193	272	163	317	295	543
1802	Metabolite_1802	4.63	212.168	FALSE		137	162	148	153	118	283	316	285	337	270	94	167	166	109	88	599	584	692	698	664	304	442	256	326	305	416	242	248	300	266	403	371	365	208	556
1803	Metabolite_1803	2.1	212.52	FALSE		513	511	658	512	528	380	383	375	455	518	831	614	706	764	734	580	579	537	751	563	843	697	773	660	838	220	254	233	200	180	482	434	490	407	627
1804	Metabolite_1804	0.89	212.849	TRUE	210.96484:16 212.83846:19 212.84914:36 212.8593:21 212.90645:23	246	211	231	153	196	279	227	252	299	291	1380	1181	1386	1447	1378	52	52	41	107	68	68	48	62	45	64	33	0	44	34	27	139	199	124	96	253
1805	Metabolite_1805	1	213.034	FALSE		348	358	404	381	329	439	410	449	471	394	548	572	425	455	573	170	119	106	140	134	235	141	137	243	184	109	155	101	124	146	287	503	293	388	336
1806	Metabolite_1806	4.97	213.043	FALSE		239	141	250	257	444	413	229	302	297	456	172	50	70	71	51	60	89	70	75	70	81	184	62	108	101	75	77	83	59	57	224	208	181	159	253
1807	Metabolite_1807	4.65	213.041	FALSE		74	72	85	90	78	81	64	122	95	66	79	72	74	59	61	80	62	96	68	79	96	132	90	100	96	58	76	45	68	157	1585	1787	1977	1476	1955
1808	Metabolite_1808	1.83	213.042	TRUE	55.01861:20 113.96803:16 139.03647:22 167.03606:21 167.0441:16 171.03331:26 213.06435:21	1361	1634	1619	1550	1327	1959	1921	1947	2082	1910	1814	2014	1796	1895	1854	253	215	189	215	272	316	293	397	388	356	100	82	111	78	73	933	1203	1122	1033	1466
1809	Metabolite_1809	4.14	213.039	FALSE		69	116	84	97	86	63	96	91	81	68	69	60	98	59	81	83	175	82	99	115	84	114	81	64	85	55	63	81	57	106	677	831	724	652	708
1810	Metabolite_1810	2.62	213.079	FALSE		98	88	117	143	127	119	123	105	146	120	98	132	84	126	105	489	460	348	431	338	510	556	534	766	667	651	597	520	577	525	332	404	256	251	439
1811	Metabolite_1811	0.81	213.077	TRUE	213.07344:17	707	848	783	882	788	875	953	1018	1013	1010	165	244	153	214	235	2405	2190	3072	2638	2513	1650	1687	1479	1777	1570	12660	10998	11362	11224	11218	214	189	186	201	219
1812	Metabolite_1812	4.65	213.093	FALSE		153	123	132	131	115	117	138	125	121	112	151	158	146	96	105	196	231	182	236	217	266	218	252	302	246	106	116	159	113	125	889	875	864	653	806
1813	Metabolite_1813	0.98	213.101	FALSE		281	323	365	328	287	315	271	228	201	226	239	306	300	202	190	255	269	201	264	179	173	151	149	151	139	159	124	174	137	171	474	447	395	530	670
1814	Metabolite_1814	3.16	213.112	FALSE		105	213	87	125	145	110	75	107	141	73	141	137	128	105	90	129	138	130	145	121	76	131	75	99	85	67	102	82	79	100	612	768	702	384	694
1815	Metabolite_1815	3.43	213.112	TRUE	163.06758:28 167.06979:56 167.07506:25 171.1013:16 195.1066:16 212.17421:16	358	438	329	347	344	219	178	178	285	250	210	297	220	210	193	1421	1770	1179	1303	1266	1118	1370	1479	1755	1233	690	546	537	555	480	438	378	390	324	470
1816	Metabolite_1816	3.93	213.111	FALSE		176	131	171	108	112	107	137	158	183	140	232	255	280	249	206	424	398	427	370	531	592	558	594	629	629	198	215	146	209	217	250	226	213	205	306
1817	Metabolite_1817	3.42	213.118	TRUE	92.9063:20 123.08377:25 167.06526:16 167.07443:20 167.08264:37 187.12706:23 213.11523:36	358	438	329	347	344	219	178	178	268	250	187	297	220	229	193	1308	1488	1339	1435	1395	1218	1454	1370	1496	1294	573	546	537	555	480	455	392	390	324	470
1818	Metabolite_1818	6.37	213.146	FALSE		903	705	1131	1135	551	450	1110	697	640	860	659	1746	751	590	968	626	365	428	231	433	596	236	647	384	429	1115	491	1183	712	651	703	610	1231	1213	1052
1819	Metabolite_1819	6.38	213.148	FALSE		903	671	995	925	551	450	1306	826	738	835	760	1494	638	737	790	626	372	428	231	433	596	236	647	366	429	985	491	921	560	752	703	610	1016	1129	1053
1820	Metabolite_1820	2.58	213.159	FALSE		274	233	202	224	196	117	82	160	110	170	595	757	658	672	557	133	114	158	110	157	77	83	44	62	60	45	52	44	53	48	232	289	219	196	325
1821	Metabolite_1821	8.82	213.162	FALSE		494	375	612	544	478	297	349	459	504	340	168	142	126	153	112	108	92	88	83	134	143	154	110	153	82	119	120	100	66	143	191	162	120	161	146
1822	Metabolite_1822	12.93	213.891	TRUE	131.93198:17 174.94792:16 176.51617:42 213.8923:16	1560	1837	1739	1846	1786	1532	1826	1743	1887	1904	1855	2123	1821	1737	1899	1930	1544	1765	1823	1684	1836	1655	1757	1886	1728	1695	1764	1898	1849	1822	1724	1715	1972	1886	1639
1823	Metabolite_1823	7.34	214.256	TRUE	214.2525:34	1377	224	773	928	403	864	3247	337	2138	4583	542	2084	879	547	1103	1754	780	671	962	1027	1058	1071	712	1033	762	630	1051	594	1615	513	1007	544	927	658	647
1824	Metabolite_1824	0.88	214.84	FALSE		125	94	83	90	67	83	88	83	96	44	341	434	640	676	452	57	40	27	56	41	33	69	25	46	32	20	27	22	18	16	66	85	40	66	83
1825	Metabolite_1825	0.72	214.915	FALSE		616	600	696	594	825	567	695	522	667	584	552	516	523	579	581	1241	809	1068	837	928	1601	1162	1503	1486	1216	407	403	423	688	368	633	618	1304	1469	1165
1826	Metabolite_1826	0.74	214.915	FALSE		576	610	696	619	825	694	860	788	550	802	697	516	523	647	677	1365	742	1183	804	968	1470	1242	1556	1707	1023	407	403	423	688	368	722	618	1375	1494	1108
1827	Metabolite_1827	0.72	214.985	FALSE		301	179	190	201	145	106	328	112	182	172	490	297	169	391	488	247	64	182	196	197	213	296	253	74	199	60	59	65	85	48	121	160	638	491	176
1828	Metabolite_1828	1.66	215.02	FALSE		444	580	494	428	642	280	263	206	230	233	660	589	844	676	690	271	233	292	256	323	248	308	221	219	239	139	62	88	84	88	917	681	818	976	959
1829	Metabolite_1829	0.9	215.017	FALSE		1166	1528	1355	1263	1148	240	293	223	367	278	547	643	400	574	670	79	80	71	74	71	140	166	89	79	78	95	78	78	91	91	362	274	344	339	359
1830	Metabolite_1830	0.79	215.071	FALSE		164	167	121	175	165	245	251	183	190	290	308	545	430	342	325	312	284	425	282	297	197	191	199	257	252	1388	1103	971	1017	1221	159	139	156	133	108
[truncated: 8,536 more rows]
