# Supplementary material for: Gene-Metabolite Network Analysis Revealed Tissue-Specific Accumulation of Therapeutic Metabolites in Mallotus japonicus
Source: Int J Mol Sci. 2021 Aug 17;22(16):8835. doi: 10.3390/ijms22168835 (PMC8396295; doi:10.3390/ijms22168835)
Supplement: Supplementary file 1 [file ijms-22-08835-s001.zip › Supplementary_Table S2_Knapsack_and_KEGG_mapping_of_features with legend_Megha.xlsx]

## Sheet: TableS2_KNApSAcK_Mapping
Table S2 KNApSAcK and KEGG pathway mapping of the acquired mass features
Metabolite_ID	Metabolite feature mass	Molecular mass in the KNApSAcK database	Delta Mass (ppm)	KNApSAcK_ID	Assigned Metabolite Name	Assigned Chemical Formula	Organism	Reference	Genus	Family
Metabolite_1648	204.19	204.188	-9.90648	C00003106	beta-Cadinene	C15H24	Zingiber officinale	Ukeh,Phytochem.,70,(2009),751	Zingiber	Zingiberaceae
Metabolite_1917	220.185	220.183	-9.5746	C00000149	Spathulenol	C15H24O	Cistus creticus	Paolini,Phytochem.,70,(2009),1146	Cistus	Cistaceae
Metabolite_2584	264.134	264.136	8.84233	C00000134	(s)-(+)-Abscisic acid;2,4-Pentadienoic acid	C15H20O4	Malus pumila	Rosher,Planta,165,(1985),91	Malus	Rosaceae
Metabolite_2131	234.16	234.162	8.78195	C00000474	(3E)-Laurediol	C15H22O2	Laurencia nipponica	Kazlauskas,Aust.J.Chem,30,(1977),2679	0	0
Metabolite_1883	218.167	218.167	-1.64197	C00000213	(+)-Vitrenal	C15H22O	Lepidozia vitrea	Matsuo,J. Chem. Soc. Perkin Trans. I,(1984),215	Lepidozia	Lepidoziaceae
Metabolite_2180	236.18	236.178	-8.01743	C00000478	(3E)-12,13-Dihydrolaurediol	C15H24O2	Laurencia nipponica	Fukuzawa,Phytochem.,32,(1993),1435	0	0
Metabolite_2316	246.124	246.126	6.78878	C00000497	2Z-8-Epixanthatin	C15H18O3	Xanthium pungens	Ahmed,Phytochem.,29,(1990),2211	Xanthium	Asteraceae
Metabolite_2112	232.145	232.146	6.91949	C00003155	Isovelleral	C15H20O2	Lactarius spp.	Harborne,Phytochemical Dictionary Second Edition,Taylor and Francis,(1999),Chapter50	Lactarius	Russulaceae
Metabolite_2542	262.12	262.121	2.99677	C00003164	Marasmic acid	C15H18O4	Marismius conigenus	Harborne,Phytochemical Dictionary Second Edition,Taylor and Francis,(1999),Chapter50	0	0
Metabolite_3557	332.196	332.199	7.33246	C00000012	Gibberellin A12;GA12	C20H28O4	Allium cepa	Nojiri,Biosci.Biotech.Biochem.,57,(1993),2031	Allium	Alliaceae
Metabolite_2438	252.171	252.173	4.4457	C00003119	Cuauhtemone	C15H24O3	Pluchea odorata	Harborne,Phytochemical Dictionary Second Edition,Taylor and Francis,(1999),Chapter50	Pluchea	Asteraceae
Metabolite_3391	318.22	318.219	-1.03301	C00000416	12S-HEPE;12S-Hydroxyeicosapentaenoic acid	C20H30O3	Constantinea simplex	Naglc,Tetrahedron,31,(1990),2995	Constantinea	Constantinea
Metabolite_3350	316.202	316.2	-6.32995	C00040458	Tenacibactin A	C15H28N2O5	Tenacibaculum sp. A4K-17	Jang,J.Nat.Prod.,70,(2007),563	Tenacibaculum	Flavobacteriaceae
Metabolite_3351	316.204	316.204	-0.249169	C00000414	Hybridalactone	C20H28O3	Laurencia hybrida	Higgs,Tetrahedron,37,(1981),4259	0	0
Metabolite_6594	594.159	594.158	-0.93116	C00002557	Paniculatin	C27H30O15	Dalbergia nitidula	Harborne,Phytochemical Dictionary Second Edition,Taylor and Francis,(1999),Chapter38;Harborne,The Handbook of Natural Flavonoids,1,(1999),549,C-glycosylflavones;Narayanan,Indian J.Chem.,9,(1971),14;van Heerden,J.Chem.Soc.,Perkin Trans.,1,(1980),2463	Dalbergia	Fabaceae
Metabolite_3305	314.078	314.079	2.59372	C00000651	(+)-Pisatin;6a-Hydroxy-3-methoxy-8,9-methylenedioxypterocarpan	C17H14O6	Tephrosia bidwillii	Harborne, The Handbook of Natural Flavonoids, 2, (1999), 517,Isoflavonoids and neoflavonoids;Cruickshank,Aust.J.Biol.Sci.,18,(1965),829;Pueppke,Physiol.Plant Pathol.,8,(1976),51	Tephrosia	Fabaceae
Metabolite_3125	300.062	300.063	4.21434	C00000650	(3R)-Sophorol;(-)-Sophorol	C16H12O6	Pisum sativum	Haworth,Annu.Rept.Prog.Chem,33,(1937),266	Pisum	Fabaceae
Metabolite_3199	304.24	304.24	1.00814	C00000341	Cladocroic acid	C20H32O2	Cladocroce incurvata	D'Auria,J. Nat. Prod.,56,(1993),418	Cladocroce	Chalinidae
Metabolite_816	152.12	152.12	-2.02745	C00000135	(-)-Camphor	C10H16O	Artemisia californica	Mueller,Science,143,(1964),471-473;Rice,Alleropathy,Academic Press,New York,(1984)	Artemisia	Asteraceae
Metabolite_6945	610.156	610.153	-3.66897	C00004248	Isoscutellarein 7-allosyl-(1->2)-glucoside	C27H30O16	Sideritis leucantha	Harborne, The Handbook of Natural Flavonoids, 1, (1999), 3.Flavone O-glycosides, John Wiley & Son;Barberan,J.Nat.Prod.,58,(1985),28	Sideritis	Labiatae
Metabolite_4939	456.359	456.36	2.02	C00003558	Ursolic acid	C30H48O3	Thymus vulgaris	Mors,Phytochem.,55,(2000),627	Thymus	Labiatae
Metabolite_4940	456.356	456.356	0.874556	C00017109	Fluvirucin B2	C25H48N2O5	Actinomycete strain R516-16	Naruse,J.Antibiotics 44,(1991),733	0	0
Metabolite_3589	334.216	334.214	-3.6327	C00000422	8R-HPETE	C20H30O4	Agardhiella subulata	Graber,Tetrahedron Lett,37,(1996),4635	Agardhiella	Argnidae
Metabolite_3767	348.194	348.194	-0.142287	C00000014	Gibberellin A14;GA14	C20H28O5	Sphaceloma bidentis	Rademacher,Phytochem.,31,(1992),4155	Sphaceloma	Elsinoaceae
Metabolite_4490	422.172	422.173	2.40426	C00004027	Albanin E	C25H26O6	Brosimopsis oblongifolia	Harborne, The Handbook of Natural Flavonoids, 1, (1999), 2.Flavones, John Wiley & Son;Venkataraman,Phytochem.,11,(1972),1571;Deshpande,Tetrahedron Lett.,(1968),1715	Brosimopsis	Moraceae
Metabolite_3667	340.131	340.131	0.735602	C00000997	6-Prenylnaringenin	C20H20O5	Humulus lupulus	Harborne,Phytochemical Dictionary Second Edition,Taylor and Francis,(1999),Chapter36	Humulus	Cannabaceae
Metabolite_3128	300.097	300.1	8.83064	C00002536	4-Hydroxyhomopterocarpin;Melilotocarpan A	C17H16O5	Dalbergia odorifera	Chan,Planta Med.,64,(1998),153	Dalbergia	Fabaceae
Metabolite_3882	360.157	360.157	1.01331	C00000602	(+)-Lariciresinol	C20H24O6	Magnolia kobus	Li,J.Nat.Med.,61,(2007),222	Magnolia	Magnoliaceae
Metabolite_3883	360.161	360.159	-6.93482	C00028460	Lepidine C	C21H20N4O2	Lepidium satisvum	Maier,Phytochem.,49,(1998),1791	Lepidium	Cruciferae
Metabolite_3220	306.146	306.147	1.30743	C00000132	3-Acetoxy-13-hydroxy-1(10),4,7(11)-germacratrien-12,6-olide	C17H22O5	Pentzia eenii	Jakupovic,Phytochem.,27,(1988),1129	Pentzia	Asteraceae
Metabolite_2937	288.063	288.063	0.224146	C00000960	Eriodictyol	C15H12O6	Chrysothamnus viscidiflorus	Stevens,Phytochem.,51,(1999),771	Chrysothamnus	Asteraceae
Metabolite_4845	448.101	448.101	-1.70066	C00001039	Fisetin 8-C-glucoside;8-C-Glucosylfisetin	C21H20O11	Pterocarpus marsupium	Harborne,Phytochemical Dictionary Second Edition,Taylor and Francis,(1999),Chapter37	Pterocarpus	Fabaceae
Metabolite_3522	330.183	330.183	1.77408	C00000015	Gibberellin A15;GA15	C20H26O4	Allium cepa	Nojiri,Biosci.Biotech.Biochem.,57,(1993),2031	Allium	Alliaceae
Metabolite_2838	280.131	280.131	-1.2487	C00003170	Phaseic acid	C15H20O5	Xylocarpus granatum	Li,J.Nat.Prod.,72,(2009),2110	Xylocarpus	Meliaceae
Metabolite_7261	624.173	624.169	-6.23	C00004344	Luteolin 3'-methyl ether 7-mannosyl-(1->2)-alloside	C28H32O16	Cassia alata	Harborne, The Handbook of Natural Flavonoids, 1, (1999), 3.Flavone O-glycosides, John Wiley & Son;Gupta,Phytochem.,30,(1991),2761	Cassia	Fabaceae
Metabolite_4019	374.102	374.1	-5.76315	C00001099	Skullcapflavone II;Neobaicalein	C19H18O8	Scutellaria baicalensis	Harborne,Phytochemical Dictionary Second Edition,Taylor and Francis,(1999),Chapter37	Scutellaria	Labiatae
Metabolite_3338	316.093	316.095	4.63373	C00002513	Cajanol	C17H16O6	Cajanus cajan	Harborne,Phytochemical Dictionary Second Edition,Taylor and Francis,(1999),Chapter38	Cajanus	Fabaceae
Metabolite_1011	166.098	166.099	5.75645	C00000841	6-Oxocamphor	C10H14O2	Salvia officinalis	Funk,Arch. Biochem. Biophys.,294,(1992),306	Salvia	Labiatae
Metabolite_2511	260.107	260.105	-9.09075	C00000327	Capillarol	C15H16O4	Artemisia capillaris	Takahashi,Syokubutu hormone handbook,Baifukan,(1994),327	Artemisia	Asteraceae
Metabolite_5269	478.111	478.111	0.214639	C00004400	Nepitrin;6-Methoxyluteolin 7-glucoside;Nepetin 7-glucoside	C22H22O12	Inula britannica	Park,J.Nat.Prod.,63,(2000),34	Inula	Asteraceae
Metabolite_3855	358.142	358.142	-1.07531	C00000587	(-)-Pinoresinol	C20H22O6	Daphne feddei	Liang,J.Nat.Prod.,71,(2008),1902	Daphne	Thymelaeaceae
Metabolite_2786	278.113	278.115	8.27044	C00000238	Chrysartemin A;Canin	C15H18O5	Artemisia ashurbajevii	Sakirov,Khim.Prir.Soedin.,(1985),573	Artemisia	Asteraceae
Metabolite_3832	354.152	354.148	-9.77648	C00027827	Alangiobussinine	C22H18N4O	Alangium bussyanum	Diallo,Phytochem.,40,(1995),975	Alangium	Cornaceae/Aucubaceae/Garryaceae/Helwingiaceae
Metabolite_538	136.125	136.125	2.03461	C00000184	alpha-Thujene	C10H16	Citrus aurantifolia	Jabalpurwala,Phytochem.,70,(2009),1428	Citrus	Rutaceae
Metabolite_2683	272.106	272.105	-5.7498	C00000162	Methyl 10-angeloyloxy-2Z,8Z-decadiene-4,6-dinynoate	C16H16O4	Solidago altissima	Ichihara,Agric. Biol. Chem.,40,(1976),353	Solidago	Asteraceae
Metabolite_3511	330.113	330.114	2.37984	C00031500	13-Sulfo-dihydroreynosin	C15H22O6S	Saussurea lappa	Yin,Chem.Pharm.Bull.,53,(2005),841	Saussurea	Asteraceae
Metabolite_4554	426.39	426.386	-9.04657	C00003650	Cycloartenol	C30H50O	Casearia ilicifolia	Weniger,Planta Med.,32,(1978),170	Casearia	Samydaceae
Metabolite_6222	564.148	564.148	-0.918098	C00001019	Apiin	C26H28O14	Apium graveolens	Harborne,Phytochemical Dictionary Second Edition,Taylor and Francis,(1999),Chapter37	Apium	Apiaceae
Metabolite_5069	464.096	464.095	-0.533172	C00001046	Gossypetin 8-rhamnoside	C21H20O12	Gossypium arboreum	Harborne,Phytochemical Dictionary Second Edition,Taylor and Francis,(1999),Chapter37	Gossypium	Malvaceae
Metabolite_3335	316.056	316.058	6.28971	C00026681	(-)-Arborescidine B	C16H17BrN2	Pseudodistoma arborescens	Chbani,J.Nat.Prod.,56,(1993),99	0	0
Metabolite_4024	374.14	374.137	-8.74144	C00000311	Elephantin	C20H22O7	Elephantopus elatus	Kupchan,J. Am. Chem. Soc.,88,(1966),3674	Elephantopus	Asteraceae
Metabolite_4616	432.105	432.106	1.4425	C00001017	Cosmosiin;Apigenin 7-O-beta-D-glucopyranoside;Apigenin 7-glucoside;(-)-Apigenin 7-glucoside	C21H20O10	Salvia triloba	Lu,Phytochem.,59,(2002),117	Salvia	Labiatae
Metabolite_4817	446.118	446.121	6.4408	C00002848	Obtusifolin 2-glucoside	C22H22O10	Cassia obtusifolia	Harborne,Phytochemical Dictionary Second Edition,Taylor and Francis,(1999),Chapter43	Cassia	Fabaceae
Metabolite_4043	376.151	376.152	2.87004	C00000682	(-)-Olivil;Vladinol C	C20H24O7	Epimedium grandiflorum	Umezawa,Phytochem.Rev.,2,(2003),371;Umezawa,Wood Res.,No.90,(2003),27	Epimedium	Berberidaceae
Metabolite_1844	216.153	216.151	-9.29112	C00011448	(E,E,E)-3-(4,8-Dimethyl-2,4,6-nonatrienyl)-furan;(2E,4E,6E)-Dehydrodendrolasin;Dehydrodendrolasin	C15H20O	Pleraplysilla spinifera	Cimino,Tetrahedron,28,(1972),4761;Ksebati,J.Nat.Prod.(Lioydia),51,(1988),857	0	0
Metabolite_2679	272.069	272.068	-2.3893	C00000945	Butin;7,3',4'-Trihydroxyflavanone	C15H12O5	Acacia oshanesii	Tindale,Phytochem.,8,(1969),1713	Acacia	Fabaceae
Metabolite_8552	772.203	772.2	-2.96354	C00019716	Madhusalmone	C40H36O16	Madhuca longifolia	Siddiqui,Helv. Chim. Acta,87,(2004),1194	Madhuca	Sapotaceae
Metabolite_8555	772.209	772.206	-2.99817	C00004307	Luteolin 7-gentiobioside-4'-glucoside	C33H40O21	Launaea nudicaulis	Harborne, The Handbook of Natural Flavonoids, 1, (1999), 3.Flavone O-glycosides, John Wiley & Son;Mansour,Phytochem.,22,(1983),2630	Launaea	Asteraceae
Metabolite_4248	396.158	396.157	-1.60302	C00002951	Gartanin	C23H24O6	Garcinia mangostana	Harborne,Phytochemical Dictionary Second Edition,Taylor and Francis,(1999),Chapter46	Garcinia	Clusiaceae/Clusiaceae-Guttiferae
Metabolite_3099	298.081	298.084	9.39335	C00001016	Apigenin 7,4'-dimethyl ether;5-Hydroxy-4',7-dimethoxyflavone;Genkwanin 4'-methyl ether;7-O-Methylacacetin;Acacetin 7-methyl ether;5-Hydroxy-7-methoxy-2-(4-methoxyphenyl)-4H-1-benzopyran-4-one	C17H14O5	Baccharis rhomboidalis	Harborne, The Handbook of Natural Flavonoids, 1, (1999), 2.Flavones, John Wiley & Son;Harbone, Comparative Biochemisty of the Flavonoids,(1965),39, Academic Press;Silva,Phytochem.,10,(1971),1942	Baccharis	Asteraceae
Metabolite_5159	470.335	470.34	9.75127	C00003521	Glycyrrhitinic acid	C30H46O4	Glycyrrhiza glabra	Harborne,Phytochemical Dictionary Second Edition,Taylor and Francis,(1999),Chapter53	Glycyrrhiza	Fabaceae
Metabolite_4027	374.21	374.209	-2.13645	C00011612	2,5-Di-O-methylsenecioodontol	C22H30O5	Senecio oxyodontus	Bohimann,Phytochem.,17,(1978),1591	Senecio	Asteraceae
Metabolite_4047	376.226	376.226	-0.297702	C00026557	Arundinine	C23H28N4O	Arundo donax	Zhalolov,Chem.Nat.Compd.,34,(1998),706	Arundo	Poaceae
Metabolite_2915	286.123	286.121	-7.39019	C00000952	7,3'-Dihydroxy-4'-methoxy-8-methylflavan	C17H18O4	Lycoris radiata	Harborne,Phytochemical Dictionary Second Edition,Taylor and Francis,(1999),Chapter36	Lycoris	Amaryllidaceae
Metabolite_3515	330.15	330.147	-8.78317	C00000005	Gibberellin A5;GA5	C19H22O5	Arabidopsis thaliana	Tudynski,Appl. Microbiol. Biotechnol.,66,(2005),597	Arabidopsis	Cruciferae
Metabolite_4912	454.343	454.345	3.01926	C00023782	3beta-Hydroxylanosta-7,9(11),24-trien-21-oic acid	C30H46O3	Poria cocos	Kanematsu,Chem.Pharm.Bull.,18,(1970),779-783	0	0
Metabolite_4453	418.132	418.128	-9.81478	C00023558	Tryptoquivaline E;FTE	C22H18N4O5	Aspergillus fumigatus	Turner,Fungal Metabolites II,Academic Press, (1983),435;Yamazmki,Bull.,26,(1978),111-117	Aspergillus	Trichocomaceae
Metabolite_2644	268.17	268.17	0.0588552	C00001979	N-(p-Nydroxyphenethyl)actinidine	C18H22NO	Valeriana officinalis	Harborne,Phytochemical Dictionary Second Edition,Taylor and Francis,(1999),Chapter23	Valeriana	Valerianaceae/Linnaeaceae/Dipsacaceae/Diervillaceae
Metabolite_3691	342.145	342.143	-5.61893	C00015129	Pyloricidin D	C15H22N2O7	Bacillus sp. HC-72	Nakao,J.Antibiotics 54,(2001),926	Bacillus	Bacillaceae
Metabolite_3692	342.15	342.147	-9.64421	C00011114	Brosimacutin C	C20H22O5	Brosimum acutifolium	Takashima,J.Nat.Prod.,65,(2002),1843	Brosimum	Moraceae
Metabolite_6380	578.14	578.142	3.63708	C00002917	Epicatechin-(4beta->8)-ent-epicatechin	C30H26O12	Cassia fistula	Harborne, The Handbook of Natural Flavonoids, 2, (1999), 355,Flavans and proanthocyanidins;Foo,J.Chem.Soc.Perkin Trans,1,(1983),1535;Kashiwada,Chem.Pharm.Bull.,38,(1990),888	Cassia	Fabaceae
Metabolite_1603	202.174	202.172	-6.79048	C00003122	(S)-(+)-Curcumene;(S)-alpha-Curcumene	C15H22	Zingiber officinale	Harborne,Phytochemical Dictionary Second Edition,Taylor and Francis,(1999),Chapter50	Zingiber	Zingiberaceae
Metabolite_6883	608.292	608.289	-6.22488	C00001817	Berbamine;(+)-Berbamine;d-Berbamine	C37H40N2O6	Berberis brandisiana	Hussain,J.Nat.Prod.,49,(1986),538	Berberis	Berberidaceae
Metabolite_3309	314.186	314.188	6.27378	C00000259	Momilactone A	C20H26O3	Oryza sativa	Kato,Tetrahedron Lett.,(1973),3861	Oryza	Poaceae
Metabolite_3654	338.246	338.246	-1.22389	C00000532	Betaenone E	C20H34O4	Phoma betae	Ichihara,J.Am.Chem.Soc,105,(1983),2907;Ichihara,Agric.Biol.Chem,47,(1983),2965	Phoma	Incertae sedis
Metabolite_4727	440.365	440.365	1.15183	C00021224	Betulinaldehyde;Betunal;(+)-Betunal	C30H48O2	Bersama swinyi	Monkhe,Phytochem.,49,(1998),1819	Bersama	Melianthaceae
Metabolite_3139	300.212	300.209	-8.63869	C00003484	Spruceanol	C20H28O2	Jatropha divaricata	Denton,J.Nat.Prod.,64,(2001),829	Jatropha	Euphorbiaceae
Metabolite_4165	388.115	388.116	3.07658	C00003935	3'-Hydroxy-5,6,7,8,4'-pentamethoxyflavone	C20H20O8	Citrus reticulata	Harborne, The Handbook of Natural Flavonoids, 1, (1999), 2.Flavones, John Wiley & Son;Mizuno,Chem.Pharm.Bull.,35,(1987),3125	Citrus	Rutaceae
Metabolite_4167	388.119	388.117	-5.07197	C00046401	Serantrypinone;(+)-Serantrypinone	C21H16N4O4	Penicillium thymicola	Ariza,J.Nat.Prod.,64,(2001),1590	Penicillium	Trichocomaceae
Metabolite_4697	438.167	438.168	0.980531	C00004059	Morusinol;Oxydihydromorusin;2-(2,4-Dihydroxyphenyl)-5-hydroxy-3-(3-hydroxy-3-methylbutyl)-8,8-dimethyl-4H,8H-benzo[1,2-b:3,4-b']dipyran-4-one	C25H26O7	Morus alba	Harborne, The Handbook of Natural Flavonoids, 1, (1999), 2.Flavones, John Wiley & Son;Nomura,Chem.Pharm.Bull.,25,(1977),529	Morus	Moraceae
Metabolite_6310	568.424	568.428	7.92973	C00000924	Demethylspheroidenone	C40H56O2	Rhodobacter capsulatus	Manwaring,FEBS Lett.,110,(1980),47	Rhodobacter	Rhodobacteraceae
Metabolite_4423	416.11	416.111	2.42409	C00002518	Daidzin;Daidzein 7-O-glucoside;Daidzoside	C21H20O9	Baptisia simplicifolia	Markham,Phytochem.,9,(1970),2359	Baptisia	Fabaceae
Metabolite_3435	322.122	322.124	5.14204	C00021567	14-Acetylthioxyfurodysinin lactone	C17H22O4S	Dysidea sp.	Carte,Tetrahedron Lett.,30,(1989),2725	0	0
Metabolite_2905	286.05	286.048	-9.03869	C00000674	Luteolin	C15H10O6	Prosopis affinis	Gianinetto,Lloydia,38,(1975),265	Prosopis	Fabaceae
Metabolite_3621	336.102	336.1	-7.28928	C00002566	Psoralidin;3,9-Dihydroxy-2-prenylcoumestan	C20H16O5	Phaseolus lunatus	Harborne,Phytochemical Dictionary Second Edition,Taylor and Francis,(1999),Chapter38	Phaseolus	Fabaceae
Metabolite_3859	358.212	358.21	-5.407	C00049358	Bengamide E	C17H30N2O6	Pachastrissa sp.	Fernandez,J.Nat.Prod.,62,(1999),678	0	0
Metabolite_2264	242.093	242.094	4.00986	C00000950	7,4'-Dihydroxyflavan;Cassiaflavan	C15H14O3	Broussonetia papyrifera	Harborne,Phytochemical Dictionary Second Edition,Taylor and Francis,(1999),Chapter36	Broussonetia	Moraceae
Metabolite_3867	358.218	358.214	-9.25173	C00000254	Sorgoleone	C22H30O4	Sorghum bicolor (L.) Moench	Chang,J. Am. Chem. Soc.,108, (1986),7858;Mangnus,J. Plant Growth Regul.,11,(1992),91	Sorghum	Poaceae
Metabolite_4216	392.217	392.214	-7.15944	C00033057	Isoadiantone;(+)-Isoadiantone	C29H28O	Adiantum caudatum	Singh,Indian J.Pharm.,37,(1975),64	Adiantum	Pteridaceae
Metabolite_3194	304.131	304.131	1.15148	C00003211	Angustibalin	C17H20O5	Balduina angustifolia	Lee,J. Pharm. Sci.,61,(1972),626	Balduina	Asteraceae
Metabolite_2725	276.102	276.101	-2.21844	C00027033	Xestomanzamine A	C16H12N4O	Acanthostrongylophora sp.	Karunanchi,J.Nat.Prod.,69,(2006),1034	0	0
Metabolite_3890	360.233	360.231	-3.6827	C00001700	Calycanthidine	C23H28N4	Calycanthus floridus	Harborne,Phytochemical Dictionary Second Edition,Taylor and Francis,(1999),Chapter20	Calycanthus	Calycanthaceae
Metabolite_4315	402.131	402.131	-0.614601	C00027024	Flustramide A;(-)-Flustramide A; 2-Oxoflustramine A	C21H27BrN2O	Flustra foliacea	Holst,J.Nat.Prod.,57,(1994),997;Keil,Acta Chem.Scand.B,40,(1986),555	0	0
Metabolite_3680	341.161	341.163	4.64494	C00001832	Caseadine	C20H23NO4	Corydalis caseana	Harborne,Phytochemical Dictionary Second Edition,Taylor and Francis,(1999),Chapter21	Corydalis	Fumariaceae
Metabolite_4314	402.132	402.133	1.19748	C00023559	Tryptoquivaline F	C22H18N4O4	Aspergillus fumigatus	Cole,Handbook of Toxic Fungal Metabolites,Academic Press, (1981),434;Turner,Fungal Metabolites II,Academic Press, (1983),435;Yamazmki,Bull.,26,(1978),111-117	Aspergillus	Trichocomaceae
Metabolite_2656	270.055	270.053	-7.77669	C00000555	Emodin	C15H10O5	Muehlenbeckia tamnifolia	Martinod,Politecnica,3,(1973),111	Muehlenbeckia	Polygonaceae
Metabolite_4265	398.138	398.137	-1.72041	C00007347	S-Adenosyl-L-methionine	C15H22N6O5S	Arabidopsis thaliana	Nikiforova,Plant Physiol.,138,(2005),304;Chiba,PNAS,100,(2003),10225	Arabidopsis	Cruciferae
Metabolite_2988	290.151	290.152	1.67375	C00003314	Laurenobiolide	C17H22O4	Laurus nobilis	Harborne,Phytochemical Dictionary Second Edition,Taylor and Francis,(1999),Chapter51	Laurus	Lauraceae
Metabolite_4266	398.134	398.137	7.10688	C00002597	Deoxypodophyllotoxin;(-)-Deoxypodophyllotoxin	C22H22O7	Macrococculus pomiferus	Su,Phytochem.,65,(2004),2861	Macrococculus	Menispermaceae
Metabolite_6585	594.138	594.137	-0.812319	C00004173	Apigenin 7-(6''-E-Caffeoylglucoside);7-[[6-O-[3-(3,4-Dihydroxyphenyl)-1-oxo-2-propenyl]-beta-D-glucopyranosyl]oxy]-5-hydroxy-2-(4-hydroxyphenyl)-4H-1-benzopyran-4-one	C30H26O13	Perilla frutescens	Harborne, The Handbook of Natural Flavonoids, 1, (1999), 3.Flavone O-glycosides, John Wiley & Son;Agric.Biol.Chem.,45,(1981),1855	Perilla	Labiatae
Metabolite_3370	318.109	318.11	4.76174	C00008422	Protofarrerol	C17H18O6	Leptorumohra miqueliana	Harborne, The Handbook of Natural Flavonoids, 2, (1999), 537,Flavanones and dihydroflavonols;Fukushima,Yakugaku Zasshi,89,(1969),851	0	0
Metabolite_3968	370.108	370.107	-2.79164	C00026867	Rhopaladin B	C21H14N4O3	Rhopalaea sp.	Sato,Tetrahedron,54,(1998),8687	0	0
Metabolite_3891	360.228	360.23	7.03984	C00015928	(+)-Nafuredin;FT 0554;Nafuredin	C22H32O4	Aspergillus niger FT-0554	Ui,J.Antibiotics 54,(2001),234	Aspergillus	Trichocomaceae
Metabolite_3436	322.139	322.142	7.18593	C00003373	Tetraneurin A	C17H22O6	Parthenium alpinum	Harborne,Phytochemical Dictionary Second Edition,Taylor and Francis,(1999),Chapter51	Parthenium	Asteraceae
Metabolite_4859	448.141	448.137	-9.98927	C00003981	Agehoustin C	C22H24O10	Ageratum houstonianum	Harborne, The Handbook of Natural Flavonoids, 1, (1999), 2.Flavones, John Wiley & Son;Quijano,Phytochem.,24,(1985)1085	Ageratum	Asteraceae
Metabolite_2920	286.232	286.23	-8.5874	C00000869	Abieta-7,13-diene-18-al;7,13-Abietadien-18-al;Abietal	C20H30O	Araucaria angustifolia	Ruzicka,Helv.Chim.Acta.,24,(1941),504	Araucaria	Araucariaceae
Metabolite_8431	740.214	740.216	3.85773	C00004166	Apigenin 7-rutinoside-4'-glucoside	C33H40O19	Galium mollugo	Harborne, The Handbook of Natural Flavonoids, 1, (1999), 3.Flavone O-glycosides, John Wiley & Son;Borisov,Rastit.Resur.,10,(1974),66	Galium	Rubiaceae
Metabolite_3461	326.151	326.152	2.40883	C00002423	8-(3,3-Dimethylallyl)spatheliachromene	C20H22O4	Cneorum pulverulentum	Harborne,Phytochemical Dictionary Second Edition,Taylor and Francis,(1999),Chapter34	Cneorum	Rutaceae
Metabolite_3887	360.196	360.194	-5.13486	C00002709	Tricyclodehydroisohumulone	C21H28O5	Humulus lupulus	Harborne,Phytochemical Dictionary Second Edition,Taylor and Francis,(1999),Chapter41	Humulus	Cannabaceae
Metabolite_4171	388.156	388.152	-9.32734	C00000253	(+-)-Strigol acetate	C21H24O7	Gossypium sp.	Cook,Science,154,(1966),1189;Cook,J. Am. Chem. Soc.,94,(1972),6198;Coggon,J. Chem. Soc. Perkin Trans. II,(1973),465	Gossypium	Malvaceae
Metabolite_5466	492.234	492.236	3.26917	C00003411	Caryoptin	C26H36O9	Clerodendron calamitosum	Hosozawa,Phytochem.,308,(1974),1019	Clerodendron	Verbenaceae
Metabolite_4334	404.114	404.111	-7.64966	C00003967	Agehoustin F	C20H20O9	Ageratum houstonianum	Harborne, The Handbook of Natural Flavonoids, 1, (1999), 2.Flavones, John Wiley & Son;Quijano,Phytochem.,26,(1987),2075;Vazquez,Phytochem.,27,(1988),3706	Ageratum	Asteraceae
Metabolite_5216	474.37	474.371	1.86887	C00003678	Bryodulcosigenin	C30H50O4	Bryonia dioica	Harborne,Phytochemical Dictionary Second Edition,Taylor and Francis,(1999),Chapter57	Bryonia	Cucurbitaceae
Metabolite_4104	382.186	382.189	8.98451	C00001682	Akuammine	C22H26N2O4	Picralima klaineanas	Clinquart,J.Pharm.Belg.,9,(1927),187;Henry,J.Chem.Soc.,(1927),1950	Picralima	Apocynaceae
Metabolite_2944	288.137	288.136	-4.04122	C00002998	Karwinaphthol B	C17H20O4	Karwinskia humboldtiana	Harborne,Phytochemical Dictionary Second Edition,Taylor and Francis,(1999),Chapter47	Karwinskia	Rhamnaceae
Metabolite_4172	388.209	388.21	2.30404	C00029499	3-Hydroxy-5,6-epoxy-beta-ionol 9-O-beta-D-glucopyranoside	C19H32O8	Sedum sarmentosum	Ninomiya,Chem.Pharm.Bull.,55,(2007),1185	Sedum	Crassulaceae
Metabolite_5271	478.149	478.149	-0.155727	C00018638	Streptonigrone	C24H22N4O7	Streptomyces sp. CAS No. 114	Herlt,J. Antibiotics,38,(1985),516	Streptomyces	Streptomycetaceae
Metabolite_985	164.082	164.084	8.56928	C00000619	Eugenol	C10H12O2	Cistus creticus	Paolini,Phytochem.,70,(2009),1146	Cistus	Cistaceae
Metabolite_4336	404.131	404.132	3.31096	C00003081	Gardenoside	C17H24O11	Rothmannia globosa	Jensen,Phytochem.,22,(1983),1761	Rothmannia	Rubiaceae
Metabolite_3032	292.167	292.167	0.806751	C00002746	[6]-Gingerdione	C17H24O4	Zingiber officinale	Harborne,Phytochemical Dictionary Second Edition,Taylor and Francis,(1999),Chapter42	Zingiber	Zingiberaceae
Metabolite_5416	488.35	488.35	0.104627	C00003739	Asiatic acid	C30H48O5	Eugenia crebrinervis	Bannon,Aust.J.Chem.,29,(1976),1135	Eugenia	Myrtaceae
Metabolite_5646	506.234	506.23	-7.44741	C00005033	Broussoflavonol C	C30H34O7	Broussonetia papyrifera	Harborne, The Handbook of Natural Flavonoids, 1, (1999), 181.Flavonols;Fukai,Chem.Pharm.Bull.,34,(1986),1987;Fukai,T.Heterocycles,29,(1989),2379	Broussonetia	Moraceae
Metabolite_4181	390.096	390.095	-2.66954	C00003966	Agecorynin D;2-(2,4-Dihydroxy-5-methoxyphenyl)-5-hydroxy-6,7,8-trimethoxy-4H-1-benzopyran-4-one	C19H18O9	Ageratum corymbosum	Harborne, The Handbook of Natural Flavonoids, 1, (1999), 2.Flavones, John Wiley & Son;Quijano,Phytochem.,19,(1980),2439;Fang,Phytochem.,25,(1986),927	Ageratum	Asteraceae
Metabolite_4098	382.1	382.103	7.9468	C00010539	7-Chlorodeutziol	C15H23ClO9	Mentzelia decapetala	Esposito,Gazz.Chim.Ital.,106,(1976),57;El-Naggar,J.Nat.Prod.,45,(1982),539	Mentzelia	Loasaceae
Metabolite_2310	246.088	246.089	4.8169	C00000584	(+)-Marmesin	C14H14O4	Tephrosia toxicaria	Jang,J. Nat. Prod.,66,(2003),1166	Tephrosia	Fabaceae
Metabolite_6781	600.415	600.418	4.55804	C00003764	Capsorubin	C40H56O4	Capsicum annuum	Ruttimann,Helv. Chim. Acta,66,(1983),1939	Capsicum	Solanaceae
Metabolite_3485	328.134	328.131	-8.38018	C00002465	Decursin	C19H20O5	Angelica decursiva	Harborne,Phytochemical Dictionary Second Edition,Taylor and Francis,(1999),Chapter35	Angelica	Apiaceae
Metabolite_3719	344.201	344.199	-7.44967	C00015574	F 12509A	C21H28O4	Trichopezizella barbata SANK 25395	Kono,J.Antibiotics 53,(2000),459	0	0
Metabolite_2896	285.135	285.136	5.15519	C00001578	Narwedine	C17H19NO3	Ungernia victoris	Harborne,Phytochemical Dictionary Second Edition,Taylor and Francis,(1999),Chapter17	Ungernia	Amaryllidaceae
Metabolite_2754	276.174	276.173	-4.99295	C00002774	[6]-Shogaol	C17H24O3	Zingiber officinale	Harborne,Phytochemical Dictionary Second Edition,Taylor and Francis,(1999),Chapter42	Zingiber	Zingiberaceae
Metabolite_4288	400.26	400.261	3.83772	C00003460	Ophiobolin A	C25H36O4	Helminthosporium zizaniae	Nozoe,J.Am.Chem.Soc.,87,(1967),4968	Helminthosporium	Pleosporaceae
Metabolite_2285	244.07	244.07	-1.99704	C00001508	5-Ribosyluracil	C9H12N2O6	Agrobacterium tumefaciens	Harborne,Phytochemical Dictionary Second Edition,Taylor and Francis,(1999),Chapter14	0	0
Metabolite_4491	422.195	422.194	-1.07916	C00003101	Valtrate;Valtratum	C22H30O8	Valeriana wallichi	Nozoe,Tetrahedron Lett.,(1976),4625;Funke,Planta Med.,28,(1978),215	Valeriana	Valerianaceae/Linnaeaceae/Dipsacaceae/Diervillaceae
Metabolite_808	152.046	152.045	-8.31831	C00018697	8-Azaguanine;Azaguanine;Azan;Guanazol;Guanazolo;NSC 151069;NSC 223526;NSC 749;Pathocidin;Pathocidine	C4H4N6O	Streptomyces albus var. pathocidicus	Anzai,J. Antibiotics Series A,14,(1961),340	Streptomyces	Streptomycetaceae
Metabolite_3585	334.177	334.178	3.29283	C00000214	Gibberellin A10;GA10	C19H26O5	Gibberella fujikuroi	Brown,Tetrahedron,23,(1967),4095	Gibberella	Nectriaceae
Metabolite_1505	196.075	196.074	-7.47003	C00002686	Acetosyringone	C10H12O4	Bulbine narcissifolia	Qhotsokoane-Lusunzi,J.Nat.Prod.,64,(2001),1368	Bulbine	Asphodelaceae
Metabolite_6706	596.173	596.174	1.83974	C00000946	Butrin	C27H32O15	Butea frondosa	Harborne, The Handbook of Natural Flavonoids, 2, (1999), 386,Flavanones and dihydroflavonols;Lal,J.Indian Chem.Soc.,12,(1935),262;Rao,J.Sci.Ind.Res.India,8B,(1949),178	Butea	Fabaceae
Metabolite_6703	596.139	596.138	-2.49724	C00004474	Isoetin 7-glucoside-2'-xyloside	C26H28O16	Hypochoeris laevigata	Harborne, The Handbook of Natural Flavonoids, 1, (1999), 3.Flavone O-glycosides, John Wiley & Son;Gluchoff-Fiasson,Phytochem.,30,(1991),1673	Hypochoeris	Asteraceae
Metabolite_5449	490.234	490.236	3.90684	C00004037	Rubraflavone C	C30H34O6	Morus rubra	Harborne, The Handbook of Natural Flavonoids, 1, (1999), 2.Flavones, John Wiley & Son;Deshpande,Indian J.Chem.,12,(1974),431	Morus	Moraceae
Metabolite_2801	278.152	278.152	-1.13016	C00013198	Ivangulin;[3aR-[3aalpha,5(S*),7aalpha]]-2,3,3a,4,7,7a-Hexahydro-gamma,6-dimethyl-3-methylene-2-oxo-5-benzofuranbutanoic acid methyl ester	C16H22O4	Iva angustifolia	Herz,J.Org.Chem.,32,(1967),3658;Herz,J.Org.Chem.,45,(1980),3163	Iva	Asteraceae
Metabolite_5141	468.327	468.324	-6.11469	C00033231	Myrica acid;(-)-Myrica acid	C30H44O4	Myrica cerifera L.	Nagai,Chem.Pharm.Bull.,48,(2000),1427	Myrica	Myricaceae
Metabolite_6538	592.263	592.267	7.10714	C00032031	Moreollic acid	C34H40O9	Garcinia hanburyi	Sukpondma,Chem.Pharm.Bull.,53,(2005),850	Garcinia	Clusiaceae/Clusiaceae-Guttiferae
Metabolite_2447	254.092	254.094	9.72381	C00002456	Chalepensin	C16H14O3	Ruta chalepensis	Sayed,J.Nat.Prod.,63,(2000),995	Ruta	Rutaceae
Metabolite_8896	866.208	866.206	-2.20402	C00002936	Robinetinidol-(4alpha->8)-catechin-(6->4alpoha)-robinetinidol	C45H38O18	Acacia mearnsii	Harborne,Phytochemical Dictionary Second Edition,Taylor and Francis,(1999),Chapter45	Acacia	Fabaceae
Metabolite_4669	436.137	436.137	0.970888	C00000990	Phloridzin;Phloretin 2'-glucoside	C21H24O10	Flemingia strobilifera	Saxena,Planta Med.,29,(1976),94	Flemingia	Fabaceae
Metabolite_4644	434.084	434.085	2.27576	C00004378	6-Hydroxyluteolin 6-xyloside	C20H18O11	Juniperus communis	Harborne, The Handbook of Natural Flavonoids, 1, (1999), 3.Flavone O-glycosides, John Wiley & Son;Lamer-Zarawska,Pol.J.Chem.,54,(1980),213	Juniperus	Cupressaceae
Metabolite_6660	594.454	594.45	-8.19113	C00041769	Plagionicin B	C35H62O7	Disepalum plagioneurum	Eparvier,J.Nat.Prod.,69,(2006),1289	Disepalum	Annonaceae
Metabolite_4397	412.369	412.371	3.61957	C00003645	29-Isofucosterol	C29H48O	Enteromorpha linza	Harborne,Phytochemical Dictionary Second Edition,Taylor and Francis,(1999),Chapter56	0	0
Metabolite_810	152.047	152.047	0.793002	C00000486	6-Methylsalicylic acid;6MSA	C8H8O3	Eriodictyon angustifolium	Harborne,Phytochemical Dictionary Second Edition,Taylor and Francis,(1999),Chapter40	Eriodictyon	Hydrophyllaceae
Metabolite_1726	208.112	208.11	-8.54919	C00000227	(+)-4,5-Didehydrojasmonic acid	C12H16O3	Equisetum sylvaticum	Dathe,Biochem. Physiol. Pflanz.,185,(1989),83	Equisetum	Equisetaceae
Metabolite_4321	402.24	402.241	1.24465	C00015933	Macrolactin G	C24H34O5	Bacillus sp. PP19-H3	Nagao,J.Antibiotics 54,(2001),333	Bacillus	Bacillaceae
Metabolite_4545	426.278	426.277	-1.67461	C00003761	Azafrin;escobedin	C27H38O4	Alectra parasitica var. chitrakutensis	Harborne,Phytochemical Dictionary Second Edition,Taylor and Francis,(1999),Chapter60	Alectra	Orobanchaceae
Metabolite_4622	432.142	432.142	0.946027	C00003969	Agecorynin C	C22H24O9	Ageratum corymbosum	Harborne, The Handbook of Natural Flavonoids, 1, (1999), 2.Flavones, John Wiley & Son;Quijano,Phytochem.,19,(1980),2439;Vazquez,Phytochem.,27,(1988),3706	Ageratum	Asteraceae
Metabolite_4623	432.147	432.143	-7.52937	C00023560	Tryptoquivaline G;FTG	C23H20N4O5	Aspergillus fumigatus	Cole,Handbook of Toxic Fungal Metabolites,Academic Press, (1981),438;Turner,Fungal Metabolites II,Academic Press, (1983),435;Yamazmki,Bull.,26,(1978),111-117	Aspergillus	Trichocomaceae
Metabolite_2286	244.074	244.074	0.144726	C00001300	Wyerone acid	C14H12O4	Vicia faba	Harborne,Phytochemical Dictionary Second Edition,Taylor and Francis,(1999),Chapter8	Vicia	Fabaceae
Metabolite_4149	386.173	386.173	0.556784	C00000640	(+)-Eudesmin	C22H26O6	Fagara heitzii	Mbaze,Phytochem.,70,(2009),1442	Fagara	Rutaceae
Metabolite_3743	346.212	346.214	6.31371	C00017360	[4S-[4alpha(E),4aalpha,5alpha,8aalpha]]-4,4a,5,6,7,8,8a,9-Octahydro-8a-hydroxy-3,4a,5-trimethylnaphtho[2,3-b]furan-4-yl ester 3-methyl-2-pentenoic acid	C21H30O4	Othonna heterophylla	Nagano,Bull.Chem.Soc.Jpn.,46,(1973),2840;Bohlmann,Chem.Ber.,107,(1974),3928;Tada,Bull.Chem.Soc.Jpn.,47,(1974),1999;Bohlmann,Chem.Ber.,109,(1976),1230;Jennings,J.Org.Chem.,41,(1976),4078	Othonna	Asteraceae
Metabolite_6054	544.231	544.231	-1.0587	C00012591	[2'E,7'R(S)]-2',3'-Didehydro-7'-deoxo-2'-deoxy-4'-hydroxy-7'-(1-hydroxyethyl)-8-oxo-verrucarin A;Baccharinoid B 27	C29H36O10	Baccharis megapotamica	Jarvis,J.Org.Chem.,52,(1987),45	Baccharis	Asteraceae
Metabolite_2810	278.227	278.225	-8.78192	C00001216	alpha-Eleostearic acid	C18H30O2	Aleurites cordata	Harborne,Phytochemical Dictionary Second Edition,Taylor and Francis,(1999),Chapter6	Aleurites	Euphorbiaceae
Metabolite_5209	474.118	474.116	-3.40001	C00004148	Apigenin 7-(6''-ethylglucuronide)	C23H22O11	Centaurea aspera	Harborne, The Handbook of Natural Flavonoids, 1, (1999), 3.Flavone O-glycosides, John Wiley & Son;Ferreres,An.Quim.Ser.C,76(1980),92	Centaurea	Asteraceae
Metabolite_2698	274.119	274.121	4.6896	C00002880	4,4'-Dihydroxy-3,5-dimethoxybibenzyl	C16H18O4	Dendrobium candidum	Li,Chem.Pharm.Bull.,56,(2008),1477	Dendrobium	Orchidaceae
Metabolite_3415	320.09	320.09	-2.2515	C00007952	Gliricidol	C16H16O7	Gliricidia sepium	Harborne, The Handbook of Natural Flavonoids, 2, (1999), 115,Chalcones,dihydrochalcones and aurones;Manners,Phytochem.,18,(1979),1037	Gliricidia	Fabaceae
Metabolite_3737	346.107	346.105	-4.24905	C00000281	Inumakilactone B	C18H18O7	Podocarpus macrophyllus	Kupchan,Experientia,31,(1978),137	Podocarpus	Podocarpaceae
Metabolite_5226	476.096	476.095	-0.519733	C00004232	Hispidulin 7-O-beta-glucuronide;(-)-Hispidulin 7-O-beta-glucuronide;Hispidulin 7-glucuronide	C22H20O12	Pedalium murex	Harborne, The Handbook of Natural Flavonoids, 1, (1999), 3.Flavone O-glycosides, John Wiley & Son;Subramanian,Phytochem.,11,(1972),464;Popova,Farm.Zh.(Kiev),27,(1972),84	Pedalium	Pedaliaceae
Metabolite_4617	432.132	432.134	4.49558	C00048653	Chaetomugilin C	C23H25ClO6	Chaetomium globosum	Blunt,Nat.Prod.Rep.,27,(2010),165	Chaetomium	Chaetomiaceae
Metabolite_3160	302.044	302.043	-4.53867	C00001092	Robinetin	C15H10O7	Albizia splendens	Lowry,Biochem. Syst. Ecol.,4,(1976),179	Albizia	Fabaceae
Metabolite_1713	208.079	208.077	-8.6382	C00028244	Epibatidine;CMI 488	C11H13ClN2	Epipedobates tricolr	Daly,J.Am.Chem.Soc.,102,(1980),830	Epipedobates	Dendrobatidae
Metabolite_1697	208.075	208.074	-5.11683	C00000541	Pyrenocine A	C11H12O4	Pyrenochaeta terrestris	Sato,Agric.Biol.Chem,45,(1981),795;Sato,Agric.Biol.Chem,45,(1981),1675	Pyrenochaeta	Incertae sedis
Metabolite_4268	398.243	398.242	-2.35213	C00017562	Antibiotic BU 3862T;Eponemycin	C20H34N2O6	Streptomyces hygroscopicus No.P247-71 (ATCC 53709)	Sugawara,J.Antibiotics,43,(1990),8	Streptomyces	Streptomycetaceae
Metabolite_1819	212.141	212.141	1.98432	C00000225	9,10-Dihydrojasmonic acid	C12H20O3	Vicia faba	Miersch,Phytochem.,28,(1989),339	Vicia	Fabaceae
Metabolite_5003	460.141	460.137	-8.4248	C00004126	7-Hydroxy-5,6-dimethoxyflavone 7-glucoside	C23H24O10	Scutellaria ovata	Harborne, The Handbook of Natural Flavonoids, 1, (1999), 3.Flavone O-glycosides, John Wiley & Son;Nicollier,J. Agric. Food Chem.,29,(1981),1179	Scutellaria	Labiatae
Metabolite_5046	462.079	462.08	1.08746	C00004216	Scutellarein 5-glucuronide	C21H18O12	Centaurea depressa	Harborne, The Handbook of Natural Flavonoids, 1, (1999), 3.Flavone O-glycosides, John Wiley & Son;Bandyukova,Khim.Pris.Soedin.,5,(1969),324	Centaurea	Asteraceae
Metabolite_5079	464.224	464.226	4.17565	C00031188	Rosiridoside B;(-)-Rosiridoside B	C21H36O11	Rhodiola sachalinensis	Yoshikawa,Chem.Pharm.Bull.,56,(2008),695	Rhodiola	Crassulaceae
Metabolite_4174	388.224	388.225	1.67579	C00012453	Juniferin;Juniperin;Juniperin (Ferula)	C23H32O5	Ferula juniperina	Sagitdinova,Khim.Prir.Soedin.,13,(1977),790;Sagitodinova,(1978),809	Ferula	Apiaceae
Metabolite_4214	392.146	392.147	2.53526	C00003279	Eupatoroxin	C20H24O8	Eupatorium rotundifolium	Harborne,Phytochemical Dictionary Second Edition,Taylor and Francis,(1999),Chapter51	Eupatorium	Asteraceae
Metabolite_5645	506.22	506.221	0.659619	C00016139	Asterriquinone SU 5501	C32H30N2O4	Aspergillus candidus	Alvi,J. Antibiotics,52,(1999),215	Aspergillus	Trichocomaceae
Metabolite_3493	329.127	329.126	-0.914006	C00002186	Melicopicine	C18H19NO5	Acronychia baueri	Harborne,Phytochemical Dictionary Second Edition,Taylor and Francis,(1999),Chapter27	Acronychia	Rutaceae
Metabolite_3437	322.165	322.164	-3.4713	C00016603	Monamidocin;(S)-N-[5-[(Aminoiminomethyl)amino]-2-hydroxy-1-oxopentyl]-L-phenylalanine	C15H22N4O4	Streptomyces sp. NR 0637	Kamiyama,J.Antibiotics 48,(1995),1221	Streptomyces	Streptomycetaceae
Metabolite_4270	398.247	398.246	-2.0439	C00012080	Cyclachaenin	C25H34O4	Iva xanthofolia	Bholmann,Phytochem.,18,(1979),1892	Iva	Asteraceae
Metabolite_3941	366.161	366.162	2.88506	C00049131	Capillaridin G	C26H22O2	Artemisia capillaris	Wu,Phytochem.,48,(1998),1645	Artemisia	Asteraceae
Metabolite_2969	290.113	290.111	-5.59303	C00007597	N-Succinyl-LL-2,6-diaminoheptanedioate	C11H18N2O7	Arabidopsis thaliana	Hudson,Biochim.Biophys.Acta,1721,(2005),27	Arabidopsis	Cruciferae
Metabolite_5158	470.265	470.267	4.28565	C00003676	Withaferin A	C28H38O6	Acnistus arborescens	Harborne,Phytochemical Dictionary Second Edition,Taylor and Francis,(1999),Chapter56	Acnistus	Solanaceae
Metabolite_4573	428.367	428.365	-3.9517	C00021222	(3beta)-28-Norlup-20(29)-ene-3,17-diol	C29H48O2	Melaleuca leucadendron	Lee,J. Nat. Prod.,61,(1998),375	Melaleuca	Myrtaceae
Metabolite_1292	184.11	184.11	-2.05948	C00000396	10-Oxo-8E-decenoic acid	C10H16O3	Psalliota bispora	Wurzenberger,Biochem.Biophys.Acta,795,(1984),163	0	0
Metabolite_4187	390.241	390.241	-1.2796	C00000564	Compactin(Penicillium);Mevastatin;Antibiotic ML 236B	C23H34O5	Monascus ruber	Endo,J.Antibiotics,33,(1979),334	Monascus	Elaphomycetaceae
Metabolite_1477	194.059	194.058	-3.68313	C00000119	4-Hydroxymellein	C10H10O4	Aspergillus ochraceus Wilhelm	Moore,Appl.Microbiol.,23,(1972),1067	Aspergillus	Trichocomaceae
Metabolite_2971	290.118	290.115	-9.30617	C00002438	5-O-Methylvisamminol	C16H18O5	Ledebouriella seseloides	Harborne,Phytochemical Dictionary Second Edition,Taylor and Francis,(1999),Chapter34	Ledebouriella	Apiaceae
Metabolite_4602	430.198	430.199	1.69634	C00000707	Hypophyllanthin	C24H30O7	Phyllanthus niruri	Mulchandani,Planta Med.,50,(1984),104;Singh,Indian J.Chem.,25B,(1986),600	Phyllanthus	Phyllanthaceae
Metabolite_5964	536.157	536.153	-7.5213	C00004477	5,4'-Dihidroxy-7,8,2',3'-tetramethoxy flavone 5-glucoside	C25H28O13	Andrographis paniculata	Harborne, The Handbook of Natural Flavonoids, 1, (1999), 3.Flavone O-glycosides, John Wiley & Son;Kuroyanagi,Chem.Pharm.Bull.,35,(1987),4429	Andrographis	Acanthaceae
Metabolite_3189	304.061	304.058	-7.63278	C00000677	Dihydroquercetin;(2R,3R)-Taxifolin;Distylin	C15H12O7	Equsetum arvense	Syrchina,Khim.Prir.Soedin.,(1975),416	0	0
Metabolite_2552	262.155	262.157	5.61122	C00011457	(E)-5-(2,6-Dimethyl-5,7-octadienyl)-3-furancarboxylic acid methyl ester	C16H22O3	Sinularia capillosa	Coll,Tetrahedron Lett.,(1977),1539;Bowden,Aust.J.Chem.,36,(1983),371	0	0
Metabolite_6224	564.18	564.178	-2.3143	C00014735	Bicaryanone A;(2S,4bR,7aS,7bR,8R,11S,13aR,13bR,14R,15S)-2,3,4b,7a,7b,8,13b,14,15,18-Decahydro-2,11-diphenyl-11H-8,13a[2',3']-furanofuro[3',2':3,4]naphtho[1,2-b:7,8-b']dipyran-4,6,13,17(5H,12H)-tetrone	C34H28O8	Cryptocarya infectoria	Dumontet,Tetrahedron,57,(2001),6189	Cryptocarya	Lauraceae
Metabolite_6271	566.416	566.418	4.64437	C00016788	Antibiotic X 14889D	C33H58O7	Streptomyces sp. X-14889	Liu,J.Antibiotics 46,(1993),275	Streptomyces	Streptomycetaceae
Metabolite_4527	424.374	424.371	-8.50058	C00019220	Lupenone	C30H48O	Phellodendron amurense	Leu,Chem.Pharm.Bull.,54,(2006),1308	Phellodendron	Rutaceae
Metabolite_4101	382.145	382.142	-9.38163	C00008749	3,5,7-Trihydroxy-6-prenylflavanone 3-acetate	C22H22O6	Helichrysum thapsus	Harborne, The Handbook of Natural Flavonoids, 2, (1999), 876,Flavanones and dihydroflavonols;Bohlmann,Phytochem.,22,(1983),2877	Helichrysum	Asteraceae
Metabolite_1255	182.057	182.058	4.86252	C00002694	2',6'-Dihydroxy-4'-methoxyacetophenone	C9H10O4	Citrus sinensis cv.Valencia	Dubery,Phytochem.,50,(1999),983	Citrus	Rutaceae
Metabolite_3463	326.198	326.199	5.53202	C00001679	Ajmaline	C20H26N2O2	Rauwolfia canescens	Khan,Chem.Ind.(London),(1954),1264;Ulshafer,J.Org.Chem.,21,(1956),923	Rauwolfia	Apocynaceae
Metabolite_4448	418.087	418.086	-1.79267	C00007664	UDP-D-xylo-4-keto-hexuronate	C15H18N2O12	Arabidopsis thaliana	Molhoj,Plant J.,35,(2003),693	Arabidopsis	Cruciferae
Metabolite_6124	552.107	552.106	-1.5879	C00006447	Taiwaniaflavone 7''-O-methyl ether	C31H20O10	Taiwania cryptomerioides	Harborne, The Handbook of Natural Flavonoids, 1, (1999), 645,Biflavonyls;Kamil,J.Chem.Soc.Perkin Trans.,1,(1981),553	Taiwania	Taxodiaceae
Metabolite_4409	414.164	414.168	9.00513	C00002613	Neoisostegane	C23H26O7	Steganotaenia araliacea	Harborne,Phytochemical Dictionary Second Edition,Taylor and Francis,(1999),Chapter39	Steganotaenia	Apiaceae
Metabolite_4474	420.142	420.142	0.735032	C00000967	Glycyphyllin	C21H24O9	Smilax glycyphylla	Harborne, The Handbook of Natural Flavonoids, 2, (1999), 115,Chalcones,dihydrochalcones and aurones;Williams,Phytochem.,6,(1967),1583;Esaki,Agric.Biol.Chem.,54,(1990),1583	Smilax	Smilacaceae
Metabolite_5050	462.153	462.153	-1.3556	C00003982	Agehoustin A	C23H26O10	Ageratum houstonianum	Harborne, The Handbook of Natural Flavonoids, 1, (1999), 2.Flavones, John Wiley & Son;Quijano,Phytochem.,21,(1982),2965	Ageratum	Asteraceae
Metabolite_4375	408.219	408.215	-9.84818	C00003412	Cascarillin	C22H32O7	Croton eluteria	Harborne,Phytochemical Dictionary Second Edition,Taylor and Francis,(1999),Chapter52	Croton	Euphorbiaceae
Metabolite_4449	418.091	418.09	-1.97745	C00004217	Scutellarein 6-xyloside	C20H18O10	Juniperus communis	Harborne, The Handbook of Natural Flavonoids, 1, (1999), 3.Flavone O-glycosides, John Wiley & Son;Lamer-Zarawska,Pol.J.Chem.,54,(1980),213	Juniperus	Cupressaceae
Metabolite_7011	612.173	612.169	-6.67883	C00007901	Okanin 3',4'-diglucoside	C27H32O16	Bidens pilosa	Harborne, The Handbook of Natural Flavonoids, 2, (1999), 115,Chalcones,dihydrochalcones and aurones;Hoffmann,Phytochem.,28,(1989),247	Bidens	Asteraceae
Metabolite_1437	192.079	192.079	-3.53656	C00002721	Carpacin	C11H12O3	Cinnamomum sp.	Harborne,Phytochemical Dictionary Second Edition,Taylor and Francis,(1999),Chapter42	Cinnamomum	Lauraceae
Metabolite_3210	306.074	306.074	-1.21129	C00007235	Leucocyanidin;(+)-2,3-trans-3,4-cis-3,4,5,7,3',4'-hexahydroxyflavan	C15H14O7	Arabidopsis thaliana	Abrahams,Plant J.,35,(2003),624	Arabidopsis	Cruciferae
Metabolite_6438	582.408	582.407	-0.73481	C00000917	Adonixanthin;Doradexanthin	C40H54O3	Agrobacterium aurantiacum	Misawa,J.Bacteriol,177,(1995),6575	0	0
Metabolite_2514	260.139	260.141	8.92191	C00003158	Lacinilene C 7-methyl ether	C16H20O3	Gossypium hirsutum	Harborne,Phytochemical Dictionary Second Edition,Taylor and Francis,(1999),Chapter50	Gossypium	Malvaceae
Metabolite_5297	480.093	480.09	-4.85913	C00004529	6-Hydroxytricetin 5-glucoside	C21H20O13	Argyreia speciosa	Harborne, The Handbook of Natural Flavonoids, 1, (1999), 3.Flavone O-glycosides, John Wiley & Son;Ahmad,J.Chem.Res.(S),7,(1993),248	Argyreia	Convolvulaceae
Metabolite_6987	611.158	611.161	4.88643	C00002378	Cyanin;Cyanidin 3,5-diglucoside	C27H31O16	Malus spp.	Harborne, The Handbook of Natural Flavonoids, 2, (1999), 1,Anthocyanins;Willstatter,Ann,401(1913),189	Malus	Rosaceae
Metabolite_5245	476.205	476.205	0.229047	C00012189	Caudatol	C25H32O9	Pericome caudata	Jolad,Phytochem.,29,(1990),3024	Pericome	Asteraceae
Metabolite_5816	522.206	522.204	-3.60943	C00009252	7-Hydroxy-5-methoxy-6-methylflavan-(2beta->7,4beta->8)-7-hydroxy-5-methoxyflavan	C33H30O6	Daemonorops draco	Harborne, The Handbook of Natural Flavonoids, 2, (1999), 355,Flavans and proanthocyanidins;Merlini,Chem.Abstr.,86,(1977),52663;Camarda,Studies in Organic Chemistry. Flavonoids and Bioflavonoids,(1981),311	Daemonorops	Palmae
Metabolite_2499	260.03	260.03	-2.32682	C00007305	D-Fructose 6-phosphate	C6H13O9P	Arabidopsis thaliana	Nikiforova,Plant Physiol.,138,(2005),304;Giege,Plant Cell.,15,(2003),2140	Arabidopsis	Cruciferae
Metabolite_3580	334.067	334.068	4.04886	C00026682	(-)-Arborescidine C	C16H19BrN2O	Pseudodistoma arborescens	Chbani,J.Nat.Prod.,56,(1993),99	0	0
Metabolite_4631	432.183	432.178	-9.96273	C00011795	(-)-Santhemoidin B;Santhemoidin B	C23H28O8	Schkuhria anthemoides	Perez,Phytochem.,23,(1984),2911	Schkuhria	Asteraceae
Metabolite_4431	416.15	416.147	-7.22294	C00002588	1-Acetoxypinoresinol	C22H24O8	Olea europaea	Harborne,Phytochemical Dictionary Second Edition,Taylor and Francis,(1999),Chapter39	Olea	Oleaceae
Metabolite_5884	528.344	528.345	1.63854	C00023850	Ganoderic acid V	C32H48O6	Ganoderma lucidum	Toth,J.Chem.Res.(M),(1983),2722-2787	Ganoderma	Ganodermataceae
Metabolite_6939	610.133	610.132	-1.42265	C00002923	Prodelphinidin B4;Gallocatechin-(4alpha->8)-epigallocatechin	C30H26O14	Ostrya virginiana	Harborne, The Handbook of Natural Flavonoids, 2, (1999), 355,Flavans and proanthocyanidins;Foo,J.Chem.Soc.Perkin Trans.,1,(1978),1186	Ostrya	Betulaceae
Metabolite_5557	500.204	500.205	2.01732	C00012608	6',7'-Didehydro-6'-de(1-hydroxyethyl)-2',3'-epoxy-2',3',7',8'-tetrahydrosatratoxin H;Myrotoxin A	C27H32O9	Myrothecium roridum	Jarvis,Tetrahedron Lett.,26,(1985),4859	Myrothecium	Incertae sedis
Metabolite_6270	566.412	566.412	0.631022	C00003771	Eschscholtzxanthin	C40H54O2	Eschscholzia californica	Strain,J. Biol. Chem.,123,(1938),425	Eschscholzia	Papaveraceae
Metabolite_2344	248.104	248.105	3.77039	C00002768	Prenyl cafeate	C14H16O4	Populus spp.	Harborne,Phytochemical Dictionary Second Edition,Taylor and Francis,(1999),Chapter42	Populus	Salicaceae
Metabolite_3938	366.144	366.143	-4.70438	C00028988	Semilepidinoside B	C17H22N2O7	Lepidium satisvum	Maier,Phytochem.,49,(1998),1791	Lepidium	Cruciferae
Metabolite_1787	210.127	210.126	-5.37349	C00000218	Jasmonic acid;trans-Jasmonic acid;3-Oxo-2-(2Z-pentenyl)cyclotentylacetic acid	C12H18O3	Helianthus tuberosus	Yoshihara,Progress Plant Growth Regulation,Academic Publishers,Dordrecht,(1992),286	Helianthus	Asteraceae
Metabolite_5555	500.199	500.199	-1.12788	C00049811	Maculalactone F	C34H28O4	Kyrtuthrix maculans	Lee,J.Nat.Prod.,61,(1998),29	0	0
Metabolite_3260	310.121	310.121	-1.33653	C00000322	Harringtonolide	C19H18O4	Cephalotaxus harringtonia	Buta,J. Org. Chem.,43,(1978),1002	Cephalotaxus	Cephalotaxaceae
Metabolite_3341	316.165	316.167	7.70385	C00000009	Gibberellin A9;GA9	C19H24O4	Abies alba	Christmann,Plant Growht Reg.,24,(1998),91	Abies	Pinaceae
Metabolite_5152	470.192	470.194	3.49725	C00002418	Butyrylmallotochromene	C26H30O8	Mallotus japonicus	Harborne,Phytochemical Dictionary Second Edition,Taylor and Francis,(1999),Chapter34	Mallotus	Euphorbiaceae
Metabolite_5882	528.267	528.272	9.2655	C00003490	Terpenoid EA-I	C30H40O8	Excoecaria agallocha	Harborne,Phytochemical Dictionary Second Edition,Taylor and Francis,(1999),Chapter52	Excoecaria	Euphorbiaceae
Metabolite_6952	610.191	610.19	-2.54532	C00000970	Hesperidin	C28H34O15	Zanthoxylum dipetalum	Fish,Phytochem.,14,(1975),2073	Zanthoxylum	Rutaceae
Metabolite_4567	428.144	428.147	7.46051	C00002616	beta-Peltatin A methyl ether	C23H24O8	Bursera fagaroides	Harborne,Phytochemical Dictionary Second Edition,Taylor and Francis,(1999),Chapter39	Bursera	Burseraceae
Metabolite_4826	446.234	446.23	-8.67289	C00003294	Gradolide	C25H34O7	Laserpitium siler	Holub,Collect. Czech. Chem. Commun,43,(1978),2471	Laserpitium	Apiaceae
Metabolite_2729	276.133	276.132	-2.12638	C00007227	Saccharopine	C11H20N2O6	Arabidopsis thaliana	Goyer,J.Biol.Chem.,279,(2004)16947	Arabidopsis	Cruciferae
Metabolite_2127	234.087	234.089	7.62695	C00000543	Pyrenochaetic acid A	C13H14O4	Pyrenochaeta terrestris	Sato,Agric.Biol.Chem,45,(1981),795;Sato,Agric.Biol.Chem,45,(1981),1675	Pyrenochaeta	Incertae sedis
Metabolite_1005	166.063	166.063	0.425366	C00000150	D-beta-Phenyllactic acid	C9H10O3	Lactobacillus plantarum MiLAB 393	Strom,Appl. Microbiol. Biotechnol.,68,(2002),4322	Lactobacillus	Lactobacillaceae
Metabolite_5644	506.215	506.215	-0.051837	C00012285	Repandin D	C26H34O10	Tetragonotheca repanda	Seaman,J.Org.Chem.,44,(1979),3400;Quijano,Phytochem.,23,(1984),829	Tetragonotheca	Asteraceae
Metabolite_3769	348.227	348.23	9.00543	C00022490	Rostratone;Methyl 3-oxo-18-hydroxy-8(17),13E-labdadien-15-oate	C21H32O4	Nolana rostrata	Garbarino,Phytochem.,25,(1986),2833	Nolana	Solanaceae
Metabolite_2207	238.083	238.084	2.94018	C00014925	(-)-EI 1941-2;EI 1941-2	C12H14O5	Farrowia sp. E-1941	Koizumi,J.Antibiotics 56,(2003),464	Farrowia	Chaetomiaceae
Metabolite_6328	570.228	570.229	0.903799	C00017221	Ro 09-1468;Tetronothiodin	C31H38O8S	Streptomyces sp. NR0489	Ohtsuka,J.Antibiotics 45,(1992),140	Streptomyces	Streptomycetaceae
Metabolite_5628	504.271	504.272	3.3607	C00000901	Taxuyunnanine C;Taxuyunnanin C;Sinenxan A	C28H40O8	Taxus chinensis	Fleming,J. Am. Chem. Soc,115,(1993),805	Taxus	Taxaceae
Metabolite_5153	470.198	470.197	-2.09434	C00016736	BU 3285T;Sultriecin	C23H34O8S	Streptomyces roseiscleroticus L827-7 (ATCC 53903)	Ohkuma,J.Antibiotics 45,(1992),1239	Streptomyces	Streptomycetaceae
Metabolite_3939	366.148	366.147	-4.09599	C00004013	cis-Tephrostachin	C22H22O5	Tephrosia polystachyoides	Harborne, The Handbook of Natural Flavonoids, 1, (1999), 2.Flavones, John Wiley & Son;Vleggar,J.S.Afr.Chem.Inst.,26,(1983),71	Tephrosia	Fabaceae
Metabolite_3991	372.23	372.23	-0.440691	C00030938	Pelorol	C23H32O4	Hippospongia sp.	Oda,J.Nat.Med.,61,(2007),434	0	0
Metabolite_3987	372.228	372.226	-5.06891	C00049359	Bengamide F	C18H32N2O6	Pachastrissa sp.	Fernandez,J.Nat.Prod.,62,(1999),678	0	0
Metabolite_5376	486.227	486.225	-2.58211	C00012674	Verrucarin K	C27H34O8	Myrothecium verrucaria	Breitenstein,Helv.Chim.Acta,60,(1977),1522	Myrothecium	Incertae sedis
Metabolite_5685	512.352	512.35	-3.21832	C00016267	Leptofuranin A	C32H48O5	Streptomyces tanashiensis 3007-H1	Hayakawa,J.Antibiotics 49,(1996),974	Streptomyces	Streptomycetaceae
Metabolite_7661	650.406	650.403	-3.88294	C00029800	Bayogenin 3-O-beta-D-glucopyranoside	C36H58O10	Polygala japonica	Wang,Chem.Pharm.Bull.,54,(2006),1739	Polygala	Polygalaceae
Metabolite_2022	226.086	226.085	-2.04603	C00026501	Meridianin A	C12H10N4O	Aplidium meridianum	Hernandez Franco,J.Nat.Prod.,61,(1998),1130;Fresneda,Tetrahedron,57,(2001),2355	0	0
Metabolite_4170	388.136	388.137	3.40973	C00000320	Geniposide	C17H24O10	Rothmannia globosa	Jensen,Phytochem.,22,(1983),1761	Rothmannia	Rubiaceae
Metabolite_1939	222.056	222.056	-0.582106	C00007646	2-(3'-Methylthio)propylmalic acid	C8H14O5S	Arabidopsis thaliana	Textor,Planta,218,(2004),1026	Arabidopsis	Cruciferae
Metabolite_1979	224.07	224.068	-5.1326	C00002776	Sinapic acid	C11H12O5	Calligonum leucocladum	Vorovskii,Rastit.Resur.,12,(1976),76;Dubinin,Khim.Prir.Soedin.,(1975),427	Calligonum	Polygonaceae
Metabolite_6417	582.188	582.189	0.960185	C00006523	Semecarpetin	C34H30O9	Semecarpus kurzii	Alam,Chem.Ind.(London)	Semecarpus	Anacardiaceae
Metabolite_2436	252.138	252.136	-5.80806	C00011033	[1S-(1a,2b,5a,6a)]-4,7,7-trimethylbicyclo[3.1.1]hept-3-ene-2,6-diol diacetate	C14H20O4	Diotis maritima	Teresa,An.Quim.,75,(1979),323	0	0
Metabolite_5618	504.215	504.215	-0.833318	C00005087	Broussoflavonol D	C30H32O7	Broussonetia papyrifera	Harborne, The Handbook of Natural Flavonoids, 1, (1999), 181.Flavonols;Fukai,Heterocycles,29,(1989),2379;Fukai,Heterocycles,34,(1992),1213	Broussonetia	Moraceae
Metabolite_3247	309.136	309.136	2.81407	C00015160	CJ 15696	C19H19NO3	Cladobotryum varium CL12284	Sakemi,J.Antibiotics 55,(2002),6	Cladobotryum	Hypocreaceae
Metabolite_5379	486.229	486.229	-0.379714	C00046269	Pandangolide 4;(-)-Pandangolide 4	C24H38O8S	Callyspongia aerizusa	Jadulco,J.Nat.Prod.,64,(2001),527	0	0
Metabolite_3060	294.111	294.11	-3.00989	C00003381	Tutin	C15H18O6	Coriaria angustissima	Harborne,Phytochemical Dictionary Second Edition,Taylor and Francis,(1999),Chapter51	Coriaria	Coriariaceae
Metabolite_4322	402.275	402.277	4.19152	C00016442	Fusarielin A	C25H38O4	Fusarium sp. K432	Kobayashi,J.Antibiotics 48,(1995),42	0	0
Metabolite_6522	590.243	590.242	-2.77296	C00025264	(+)-Cycleatjehine; Cycleatjehine	C36H34N2O6	Cyclea atjehensis Forman	Tantisewie,Tetrahedron,46,(1990),325	Cyclea	Menispermaceae
Metabolite_3695	342.185	342.183	-5.00969	C00015288	3,3'-Dihydroxy-4,5'-dimethoxy-2-isopentenylbibenzyl;Canniprene	C21H26O4	Cannabis sativa	Crombie,Tetrahedron Lett., (1978),4711;Crombie,J.Chem.Soc.Perkin Trans.,1,(1982),1455;Kettenes,Recl.Trav.ChimPays-Bas.,97,(1978),221	Cannabis	Cannabaceae
Metabolite_1488	194.132	194.131	-7.95201	C00010863	Thymoquinol dimethyl ether;4-Hydroxythymol dimethyl ether	C12H18O2	Eupatorium spp.	Sherk,J.Am.Pharm.Assoc.,10,(1921),97;Zavarin,J.Org.Chem.,20,(1955),82;Pilo,Acta Chem.Scand.,14,(1960),353;Chow,Acta Chem.Scand.,16,(1962),1291;Metwally,Chem.Pharm.Bull.,34,(1986),378	Eupatorium	Asteraceae
Metabolite_5543	498.372	498.371	-1.63225	C00023808	Echinodol	C32H50O4	Echinodontium tsugicola	Kanamatsu,Chem.Pharm.Bull.,20,(1972),1993	Echinodontium	Echinodontiaceae
Metabolite_1203	180.064	180.063	-3.52893	C00001117	D-Fructose;b-D-Fructofuranose	C6H12O6	Arabidopsis thaliana	Nikiforova,Plant Physiol.,138,(2005),304	Arabidopsis	Cruciferae
Metabolite_3582	334.106	334.105	-2.60582	C00002453	(+)-Byakangelicin;Byakangelicin	C17H18O7	Angelica dahurica var.dahurica	Kimura,J.Nat.Prod.,60,(1997),249	Angelica	Apiaceae
Metabolite_4521	424.138	424.137	-1.83092	C00002496	Rutarin	C20H24O10	Ruta chalepensis	Harborne,Phytochemical Dictionary Second Edition,Taylor and Francis,(1999),Chapter35	Ruta	Rutaceae
Metabolite_5896	530.248	530.252	5.95805	C00003640	Uscharidin	C29H38O9	Asclepias fruticosa R.Br.	Cheung,J.Chem.Soc.,Perkin 1,(1983),2827	Asclepias	Apocynaceae
Metabolite_5929	532.235	532.231	-7.095	C00003715	12alpha-Hydroxyamoorstatin	C28H36O10	Aphanamixis grandifolia	Harborne,Phytochemical Dictionary Second Edition,Taylor and Francis,(1999),Chapter58	Aphanamixis	Meliaceae
Metabolite_2369	248.178	248.178	-2.79452	C00000483	Hexadeca-4,7,10,13-tetraenoic acid;4,7,10,13-cis-Hexadecatetraenoic acid	C16H24O2	Laurencia nipponica	Jones,Chem.Br,2,(1966),6	0	0
Metabolite_5716	516.206	516.201	-9.18032	C00023557	Deoxynortryptoquivaline	C28H28N4O6	Aspergillus clavatus	Buchi,J.Org.Chem.42,(1977),244-246;Cole,Handbook of Toxic Fungal Metabolites,Academic Press, (1981),434;Turner,Fungal Metabolites II,Academic Press, (1983),435	Aspergillus	Trichocomaceae
Metabolite_1575	200.155	200.157	5.88085	C00000455	(3E)-Laurencenyne;trans-Laurencenyne	C15H20	Laurencia nipponica	Kigoshi,Tetrahedron Lett,22,(1981),4729;Kigoshi,Tetrahedron Lett,22,(1981),1475	0	0
Metabolite_5053	462.206	462.204	-3.86162	C00019585	di-O-Methyl scandenin	C28H30O6	Derris scandens	Rao,Phytochem.,37,(1994),267	Derris	Fabaceae
Metabolite_4778	444.178	444.178	1.7883	C00013200	Mortonin B;(5alpha,5aalpha,6alpha,7beta,9beta,9aalpha)-7-(Acetyloxy)-6-(benzoyloxy)-5,5a,6,7,8,9-hexahydro-9-hydroxy-2,2,5a,9-tetramethyl-2H-5,9a-(epoxymethano)-1-benzoxepin-10-one	C24H28O8	Mortonia greggii	Rodriguez-Hahn,Tetrahedron,33,(1977),657;Martinez,Phytochem.,21,(1982),1335	Mortonia	Celastraceae
Metabolite_5117	466.307	466.308	1.90063	C00012549	Mastigophorene C;[S-(R*,R*)]-3-[[3,4-Dihydroxy-5-(1,2,2-trimethylcyclopentyl)phenyl]methyl]-4-methyl-6-(1,2,2-trimethylcyclopentyl)-1,2-benzenediol	C30H42O4	Mastigophora diclados	Fukuyama,J.Chem.Soc.,Chem.Comun.,(1988),1341	0	0
Metabolite_3849	356.2	356.199	-3.2683	C00008786	Nitenin	C22H28O4	Spongia agaricina	Rueda,J.Nat.Prod.,61,(1998),258	0	0
Metabolite_5381	486.257	486.262	8.90471	C00035011	27-Hydroxywithanone	C28H38O7	Withania somnifera	Dhar,Phytochem.,67,(2006),2269	Withania	Solanaceae
Metabolite_4884	450.168	450.168	-1.267	C00004041	Dihydrocycloartomunin	C26H26O7	Artocarpus communis	Harborne, The Handbook of Natural Flavonoids, 1, (1999), 2.Flavones, John Wiley & Son;Lin,Phytochem.,30,(1991),1669	Artocarpus	Moraceae
Metabolite_3922	364.097	364.095	-7.51262	C00000701	Justicidin B	C21H16O6	Justicia hayati	Okigawa,Tetrahedron,26,(1970),4301	Justicia	Acanthaceae
Metabolite_3181	303.147	303.147	0.773942	C00001567	Carinatine	C17H21NO4	Zephyranthes carinata	Harborne,Phytochemical Dictionary Second Edition,Taylor and Francis,(1999),Chapter17	Zephyranthes	Amaryllidaceae
Metabolite_1664	206.06	206.058	-8.80694	C00002433	Lathodoratin	C11H10O4	Lathyrus hirsutus	Robeson,Phytochem.,19,(1980),2171	Lathyrus	Fabaceae
Metabolite_1864	218.097	218.098	3.40042	C00007654	2-Oxo-9-methylthiononanoic acid;9-Methylthio-2-nonanoic acid	C10H18O3S	Arabidopsis thaliana	Textor,Planta,218,(2004),1026	Arabidopsis	Cruciferae
Metabolite_2734	276.135	276.136	3.75025	C00003367	Scorpioidin	C16H20O4	Vernonia scorpioides	Harborne,Phytochemical Dictionary Second Edition,Taylor and Francis,(1999),Chapter51	Vernonia	Asteraceae
Metabolite_5325	482.341	482.341	-0.57258	C00028083	Complanadine A	C32H42N4	Lycopodium complanatum	Kobayashi,Tetrahedron Lett.,41,(2000),9069	Lycopodium	Lycopodiaceae
Metabolite_1868	218.095	218.094	-3.34367	C00002399	6-Hydroxytremetone	C13H14O3	Abrotanella spp.	Harborne,Phytochemical Dictionary Second Edition,Taylor and Francis,(1999),Chapter33	Abrotanella	Asteraceae
Metabolite_7105	618.388	618.392	6.49411	C00029465	2-O-E-p-Coumaroylalphitolic acid	C39H54O6	Zizphus cambodiana	Suksamrarn,Chem.Pharm.Bull.,54,(2006),535	0	0
Metabolite_5506	496.305	496.304	-2.22679	C00003666	Polypodine B	C27H44O8	Beta vulgaris	Rubenstein,Phytochem.,70,(2009),100	Beta	Chenopodiaceae
Metabolite_1024	168.042	168.042	0.804536	C00000258	2,6-Dimethoxy-p-benzoquinone	C8H8O4	Populus pseudosimonii	Pei,Zhongcaoyao,14,(1983),433	Populus	Salicaceae
Metabolite_5581	502.225	502.22	-8.44423	C00003200	Verrucarin A	C27H34O9	Myrothecium roridum	Namikoshi,J.Nat.Prod.,64,(2001),396	Myrothecium	Incertae sedis
Metabolite_1934	222.053	222.053	0.449813	C00000743	o-Succinylbenzoic acid;OSB	C11H10O5	Catalpa ovata	Inouye,The Chemistry of Quinonoid Compounds,vol II,(1988),1293;Inoue,Tetrahedron Lett,21,(1976),1975	Catalpa	Bignoniaceae
Metabolite_4587	430.162	430.163	2.66006	C00002627	Sesartemin	C23H26O8	Artemisia absinthium	Harborne,Phytochemical Dictionary Second Edition,Taylor and Francis,(1999),Chapter39	Artemisia	Asteraceae
Metabolite_4747	442.09	442.09	-0.739105	C00008865	Catechin 3-O-gallate	C22H18O10	Bergenia cordifolia	Harborne, The Handbook of Natural Flavonoids, 2, (1999), 355,Flavans and proanthocyanidins;Haslam,J.Chem.Soc.C.,(1969),1824;Malan,Phytochem.,30,(1991),2737	Bergenia	Saxifragaceae
Metabolite_5715	516.199	516.199	-0.0442571	C00001520	Phaseolotoxin	C14H33N10O7PS	Phaseolus vulgaris	Harborne,Phytochemical Dictionary Second Edition,Taylor and Francis,(1999),Chapter15	Phaseolus	Fabaceae
Metabolite_1984	224.106	224.105	-3.85779	C00002691	Aspidinol	C12H16O4	Athyrium filix-femina	Harborne,Phytochemical Dictionary Second Edition,Taylor and Francis,(1999),Chapter41	Athyrium	Woodsiaceae/Dryopteridaceae
Metabolite_2108	232.109	232.11	2.67472	C00002426	Encecalin	C14H16O3	Ageratina scorodonoides	Harborne,Phytochemical Dictionary Second Edition,Taylor and Francis,(1999),Chapter34	Ageratina	Asteraceae
Metabolite_1987	224.107	224.108	4.04407	C00030831	Nonyl sulfate	C9H20O4S	Daphnia pulex	Yasumoto,Chem.Pharm.Bull.,56,(2008),133	Daphnia	Daphniidae
Metabolite_3257	310.085	310.084	-4.19238	C00002947	6-Deoxyjacareubin	C18H14O5	Calophyllum zeylanicum	Harborne,Phytochemical Dictionary Second Edition,Taylor and Francis,(1999),Chapter46	Calophyllum	Calophyllaceae/Clusiaceae/Clusiaceae-Guttiferae
Metabolite_368	124.052	124.052	0.854086	C00000776	p-Hydroxybenzyl alcohol	C7H8O2	Escherichia coli	White,Escherichia coli and Salmonella.Cellular and Molecular Biology,ASM Press.Washington DC,vol 1,(1996),p680	Escherichia	Enterobacteriaceae
Metabolite_4721	440.191	440.195	7.52643	C00024456	(-)-Lapidilectine A	C24H28N2O6	Kopsia lapidilecta	Awang,Tetrahedron Lett.,33,(1992),2493; Awang,J.Nat.Prod.,56,(1993),1134	Kopsia	Apocynaceae
Metabolite_5304	480.276	480.28	7.09037	C00018340	Combimicin A2	C20H40N4O9	Micromonospora sp. K-6993	Oka,J. Antibiotics,34,(1981),777	Micromonospora	Micromonosporaceae
Metabolite_3105	298.194	298.193	-0.816498	C00022306	Hedychenone	C20H26O2	Hedychium spicatum	Sharma,Phytochem.,14,(1975),1059	Hedychium	Zingiberaceae
Metabolite_6141	554.253	554.255	2.94111	C00032823	Cilistol y;(+)-Cilistol y	C28H42O9S	Solanum cilistum	Zhu,Chem.Pharm.Bull.,49,(2001),161	Solanum	Solanaceae
Metabolite_7181	622.273	622.27	-5.41801	C00000379	Allosamidin;(-)-Allosamidin;(-)-Allosamidine	C25H42N4O14	Streptomyces sp. AJ9463	Graefe,J. Antibiotics,35,(1982),1722	Streptomyces	Streptomycetaceae
Metabolite_6139	554.25	554.252	3.35455	C00003733	Toonacilin	C31H38O9	Toona ciliata	Harborne,Phytochemical Dictionary Second Edition,Taylor and Francis,(1999),Chapter58	Toona	Meliaceae
Metabolite_4338	404.255	404.256	3.34123	C00000547	Lovastatin;(+)-Mevinolin;Monacolin K	C24H36O5	Aspergillus terreus ATCC20542	Alberts,Proc. Natl. Acad. Sci. USA,77,(1980),3957	Aspergillus	Trichocomaceae
Metabolite_4250	396.179	396.178	-1.5288	C00000041	Gibberellin A41;GA41	C20H28O8	Arabidopsis thaliana	Talon,J. Plant Growth Regul.,9,(1990),201	Arabidopsis	Cruciferae
Metabolite_7496	638.307	638.306	-0.957511	C00050055	Delavayin A	C32H42N6O8	Stellaria delavayi	Morita,J.Nat.Prod.,60,(1997),212	Stellaria	Caryophyllaceae
Metabolite_4184	390.118	390.116	-5.41377	C00003089	Monotropein	C16H22O11	Saprosma scortechinii	Ling,J.Nat.Prod.,65,(2002),656	Saprosma	Rubiaceae
Metabolite_4183	390.115	390.115	0.828038	C00028952	Sagitol	C21H18N4O2S	Oceanapia sagittaria	Salomon,Tetrahedron Lett.,37,(1996),9147	0	0
Metabolite_2403	250.119	250.121	6.73881	C00002437	Methylripariochromene A	C14H18O4	Eupatorium riparium	Harborne,Phytochemical Dictionary Second Edition,Taylor and Francis,(1999),Chapter34	Eupatorium	Asteraceae
Metabolite_1999	224.142	224.141	-3.92183	C00000219	Methyl jasmonate	C13H20O3	Arabidopsis thaliana	Sandorf,Planta,216,(2002),173	Arabidopsis	Cruciferae
Metabolite_5015	460.194	460.194	0.0832644	C00029701	Apiosylepirhododendrin	C21H32O11	Acer nikoense	Morikawa,J.Nat.Med.,61,(2007),112	Acer	Sapindaceae
Metabolite_5025	460.389	460.392	6.34672	C00019451	alpha-Tocopherolquinone methyl ether	C30H52O3	Psoralea plicata	Rasool,Phytochem.,30,(1991),2800	Psoralea	Fabaceae
Metabolite_6731	596.392	596.387	-8.65781	C00000918	Astaxanthin;(3S,3'S)-3,3'-Dihydroxy-beta,beta-carotene-4,4'-dione	C40H52O4	Adonis aestivalis	Harborne,Phytochemical Dictionary Second Edition,Taylor and Francis,(1999),Chapter60	Adonis	Ranunculaceae
Metabolite_4063	378.203	378.204	2.94852	C00011387	4-Acetoxyflexilin	C21H30O6	Penicillus capitatus	Blackman,Tetrahedron Lett.,(1978),3063;Paul,Tetrahedron,40,(1984),2913	Penicillus	Udoteaceae
Metabolite_5696	514.223	514.22	-6.10801	C00000714	Gomisin E	C28H34O9	Schizandra sp.	Fujihashi,Antimicrob.Agents Chemother,39,(1995),2000	0	0
Metabolite_851	156.044	156.042	-8.10552	C00000737	2,3-Dihydro-2,3-dihydroxybenzoic acid	C7H8O4	Escherichia coli	Young,J.Bacteriol,106,(1971),51	Escherichia	Enterobacteriaceae
Metabolite_2263	242.079	242.079	-1.59191	C00010563	Genipinic acid	C11H14O6	Genipa americana	Tallent,Tetrahedron,20,(1964),1781	Genipa	Rubiaceae
Metabolite_5460	492.09	492.09	-0.627807	C00031532	2,12-Dichloroisoplagiochin;2,12-Dichloroisoplagiochin D	C28H22Cl2O4	Mastigophora diclados	Harinantenaina,Chem.Pharm.Bull.,52,(2004),1382	0	0
Metabolite_2958	289.13	289.131	3.75108	C00002140	Balfourodine	C16H19NO4	Balfourodendron riedelianum	Harborne,Phytochemical Dictionary Second Edition,Taylor and Francis,(1999),Chapter27	Balfourodendron	Rutaceae
Metabolite_2946	288.17	288.173	9.09554	C00000443	Dicranenone A	C18H24O3	Dicranum elongatum	Ichikawa,Tetrahedron Lett,32,(1983),3337	Dicranum	Dicranaceae
Metabolite_2394	250.086	250.087	2.7194	C00024364	Anhydrolycorinium chloride;Deoxylycobetaine chloride; NSC 27069	C16H12NO2	Amaryllis belladonna L.	Pettit,J.Nat.Prod.,47,(1984),796	Amaryllis	Amaryllidaceae
Metabolite_5705	514.332	514.329	-5.8024	C00023899	11-Ketofusidic acid	C31H46O6	Fusidium coccineum	Godtfredsen,Tetrahedron,35,(1979),2419-2431;Turner,Fungal Metabolites II;Academic Press,New York,NY,333 pp.(1983)	0	0
Metabolite_2245	240.21	240.209	-4.96822	C00007424	cis-10-Pentadecenoic acid	C15H28O2	Arabidopsis thaliana	Schmelz,Plant J.,2004,39,790	Arabidopsis	Cruciferae
Metabolite_6716	596.295	596.299	5.8854	C00003728	Salannin	C34H44O9	Azadirachta indica	Harborne,Phytochemical Dictionary Second Edition,Taylor and Francis,(1999),Chapter58	Azadirachta	Meliaceae
Metabolite_5016	460.188	460.189	0.35872	C00032000	Mangostenone A	C28H28O6	Garcinia mangostana	Suksamprarn,Chem.Pharm.Bull.,51,(2003),857	Garcinia	Clusiaceae/Clusiaceae-Guttiferae
Metabolite_2888	284.214	284.214	-0.0282632	C00031046	Pisiferin	C20H28O	Chamaecyparis pisifera	Yatagi,Phytochem.,19,(1980),1149	Chamaecyparis	Cupressaceae
Metabolite_1877	218.131	218.131	0.257967	C00011955	(R)-(-)-Noroxopenlanfuran;Noroxopenlanfuran	C14H18O2	Dysidea fragilis	Guella,Helv.Chim.Acta,68,(1985),39	0	0
Metabolite_4303	401.258	401.257	-4.02469	C00011359	Aspochalasin C	C24H35NO4	Aspergillus microcysticus	Cole,Handbook of Secondary Fungal Metabolites,Volume I,(2003);von Keller-Schierlein,Helvetica Chimica Acta,62,(1979),1501	Aspergillus	Trichocomaceae
Metabolite_6330	570.277	570.273	-7.07834	C00000106	19-O-Acetylchaetoglobosin A	C34H38N2O6	Chaetomium globosum	Cole,Handbook of Secondary Fungal Metabolites,Volume I,(2003);Probst,Helvetica Chimica Acta,64,(1981),2056	Chaetomium	Chaetomiaceae
Metabolite_5322	482.17	482.171	2.53464	C00021462	Melleolide D	C24H31ClO8	Armillaria mellea	Arnone,Phytochem.,25,(1986),471	Armillaria	Physalacriaceae
Metabolite_1902	220.075	220.074	-8.47297	C00003012	Polygonolide	C12H12O4	Polygonum hydropiper	Harborne,Phytochemical Dictionary Second Edition,Taylor and Francis,(1999),Chapter47	Polygonum	Polygonaceae
Metabolite_6754	598.401	598.402	2.48439	C00022923	4,4'-Dihydroxydiatoxanthin;(3S,3'S,4S,4'S)-7,8-Didehydro-beta,beta-carotene-3,3',4,4'-tetrol	C40H54O4	Asterina amurensis	Maoka,Comp. Biochem. Physiol.,93B,(1989),829	0	0
Metabolite_3024	292.131	292.131	-0.170467	C00012049	Sericealactone	C16H20O5	Neolitsea sericea	Takeda,J.Chem.Soc.,C,(1970),1547	Neolitsea	Lauraceae
Metabolite_5183	472.208	472.21	3.58834	C00003606	Bryophyllin A	C26H32O8	Bryophyllum pinnatum	Harborne,Phytochemical Dictionary Second Edition,Taylor and Francis,(1999),Chapter55	Bryophyllum	Crassulaceae
Metabolite_6083	546.251	546.246	-8.83505	C00012586	(2'E,4'R,7'R,9R,10S)-2',3'-Didehydro-7'-deoxo-2'-deoxy-9,10-epoxy-9,10-dihydro-4'-hydroxy-7'-[(1R)-1-hydroxyethyl]verrucarin A;Baccharanoid B9;Baccharene	C29H38O10	Baccharis megapotamica	Jarvis,J.Org.Chem.,52,(1987),45	Baccharis	Asteraceae
Metabolite_3198	304.167	304.167	1.10369	C00000537	Solanapyrone B	C18H24O4	Alternaria solani	Ichihara,Tetrahedron,24,(1983),5373	Alternaria	Dothideomycetes
Metabolite_4870	448.354	448.353	-2.11632	C00050283	Crambescin A;(+)-Crambescin A	C24H44N6O2	Batzella sp.	Patil,J.Nat.Prod.,60,(1997),704	0	0
Metabolite_3034	292.201	292.204	9.99717	C00000363	(12S,13S)-EOD;(12S,13S)-Epoxylinolenic acid	C18H28O3	Zea mays	Hamberg,Biochim. Biophys. Acta.,920,(1987),76	Zea	Poaceae
Metabolite_831	154.064	154.063	-6.03235	C00002646	2,6-Dimethoxyphenol	C8H10O3	Mucuna birdwoodiana	Harborne,Phytochemical Dictionary Second Edition,Taylor and Francis,(1999),Chapter40	Mucuna	Fabaceae
Metabolite_5274	478.185	478.184	-2.35551	C00008769	Dichotosinin	C24H30O10	Hoppea dichotoma	Harborne, The Handbook of Natural Flavonoids, 2, (1999), 355,Flavans and proanthocyanidins;Ghosal,Phytochem.,24,(1985),831	Hoppea	Gentianaceae
Metabolite_3021	292.107	292.106	-4.79933	C00026720	(-)-Monatin	C14H16N2O5	Schlerochiton ilicifolius	Vlegaar,J.Chem.Soc.Perkin Trans.,1,(1992),3095	0	0
Metabolite_6373	576.148	576.148	-0.204709	C00006349	Vitexin 6''-(3-hydroxy-3-methylglutarate)	C27H28O14	Eleusine coracana	Harborne, The Handbook of Natural Flavonoids, 1, (1999), 549,C-glycosylflavones;Kim,Biosci.Biotech.Biochem.,58,(1994),380	Eleusine	Poaceae
Metabolite_5194	472.215	472.215	0.115634	C00024696	Chrestifoline B	C32H28N2O2	Murraya euchrestifolia	Ito,Chem.Pharm.Bull.,38,(1990),1143	Murraya	Rutaceae
Metabolite_5013	460.172	460.173	1.97522	C00008978	Eruberin A	C24H28O9	Glaphyropteridopsis erubescens	Harborne, The Handbook of Natural Flavonoids, 2, (1999), 355,Flavans and proanthocyanidins;Tanaka,Chem.Pharm.Bull.,32,(1984),490	0	0
Metabolite_1779	210.089	210.089	2.31039	C00002703	Multifidol	C11H14O4	Jatropha multifida	Harborne,Phytochemical Dictionary Second Edition,Taylor and Francis,(1999),Chapter41	Jatropha	Euphorbiaceae
Metabolite_1732	208.145	208.146	6.75647	C00011501	trans-(+-)-2-Methyl-5-(2-methyl-5-isopropyltetrahydro-2-furyl)furan	C13H20O2	Nicotiana tabacum	Almqvist,Acta Chem.Scand.Ser.B.,28,(1974),528	Nicotiana	Solanaceae
Metabolite_5976	538.259	538.258	-2.44854	C00028760	Okaramine O	C32H34N4O4	Penicillium simplicissimum	Shino,Biosci.Biotechnol.Biochem.,64,(2000),103	Penicillium	Trichocomaceae
Metabolite_3881	360.144	360.142	-6.08422	C00010509	Ixoroside	C16H24O9	Ixora chinensis	Takeda,Phytochem.,14,(1975),2647	Ixora	Rubiaceae
Metabolite_5303	480.268	480.272	8.10937	C00022416	Neoandrographolide	C26H40O8	Andrographis paniculata	Chan,Tetrahedron,27,(1971),5081	Andrographis	Acanthaceae
Metabolite_4099	382.129	382.126	-5.6035	C00000282	Inumakilactone C	C18H22O9	Podocarpus macrophyllus	Kupchan,Experientia,31,(1978),137	Podocarpus	Podocarpaceae
Metabolite_4794	444.2	444.2	-1.74765	C00010543	Ebuloside	C21H32O10	Sambucus ebulus	Gross,Helv.Chim.Acta,69,(1986),156;Hlev.Chim.Acta,70,(1987),91	Sambucus	Adoxaceae
Metabolite_5950	534.103	534.101	-3.87218	C00001067	Luteolin 7-O-(6''-malonylglucoside)	C24H22O14	Bryum capillare	Harborne,Phytochemical Dictionary Second Edition,Taylor and Francis,(1999),Chapter37	0	0
Metabolite_1174	178.064	178.063	-7.46569	C00000171	3-Acethyl-6-methoxybenzaldehyde	C10H10O3	Encelia farinosa	Chang,Agric. Biol. Chem.,33,(1969),398	Encelia	Asteraceae
Metabolite_4799	444.361	444.36	-1.30108	C00003751	Messagenin	C29H48O3	Melilotus messanensis	Harborne,Phytochemical Dictionary Second Edition,Taylor and Francis,(1999),Chapter59	Melilotus	Fabaceae
Metabolite_5823	523.256	523.257	2.25319	C00011353	19,20-Epoxycytochalasin Q	C30H37NO7	Xylaria obovata	Cole,Handbook of Secondary Fungal Metabolites,Volume I,(2003);Dagne,Tetrahedron,50,(1994),5615	Xylaria	Xylariaceae
Metabolite_5815	522.174	522.174	-0.569013	C00003323	Melampodinin;Melampodinin A	C25H30O12	Melampodium americanum	Malcolm,Phytochem.,21,(1982),151	Melampodium	Asteraceae
Metabolite_2063	228.137	228.136	-1.59738	C00022662	(E)-7-Hydroperoxy-3,7-dimethyl-, 3-acetate 1,5-octadien-3-ol	C12H20O4	Eriocephalus kingesii	Zdero,Phytochem.,26,(1987),2763	Eriocephalus	Asteraceae
Metabolite_3373	318.149	318.147	-7.85718	C00003025	Zearalenone	C18H22O5	Gibberella zeae	Harborne,Phytochemical Dictionary Second Edition,Taylor and Francis,(1999),Chapter47	Gibberella	Nectriaceae
Metabolite_4469	420.107	420.106	-3.51504	C00004852	5,4',5'-Trihydroxy-3,6,7,8,2'-pentamethoxyflavone	C20H20O10	Gymnosperma glutinosum	Harborne, The Handbook of Natural Flavonoids, 1, (1999), 181.Flavonols;Yu,Phytochem.,27,(1988),171	Gymnosperma	Asteraceae
Metabolite_5837	524.228	524.226	-4.50484	C00003453	Mascaroside	C26H36O11	Coffea vanneyi	Ducroiux,J.Chem.Soc.,Chem.Commun.,(1975),396	Coffea	Rubiaceae
Metabolite_2265	242.129	242.131	5.1884	C00015321	3,4'-Dimethoxybibenzyl;Lunularine dimethyl ether	C16H18O2	Radula buccinifera	Asakawa,Phytochem.,21,(1982),2481	0	0
Metabolite_833	154.099	154.099	-0.284603	C00003074	Boschnialactone	C9H14O2	Boschniakia rossica	Harborne,Phytochemical Dictionary Second Edition,Taylor and Francis,(1999),Chapter49	Boschniakia	Orobanchaceae
Metabolite_4129	384.341	384.339	-4.18256	C00023743	Desmosterol;24-Dehydrocholesterol;Cholesta-5,24-dien-3beta-ol	C27H44O	Aplanopsis spp.	Turner,Fungal Metabolites II;Academic Press,New York,NY,631 pp.(1983);Weete,Structure and Function of Sterols in Fungi,Advances in Lipid Research,23,(1989),115-167	Aplanopsis	Saprolegniaceae
Metabolite_4154	386.248	386.246	-7.02655	C00017746	Actinopyrone B;SS 12538B	C24H34O4	Streptomyces pactum S12538	Yano,J.Antibiotics,39,(1986),32	Streptomyces	Streptomycetaceae
Metabolite_6713	596.289	596.289	-1.31903	C00025262	(+)-Berbamunine;Berbamunine	C36H40N2O6	Stephania pierrei Diels	Tantisewie,J.Nat.Prod.,52,(1989),846	Stephania	Menispermaceae
Metabolite_3826	354.094	354.095	3.8369	C00002500	Scopolin	C16H18O9	Baptisia bracteata	Markham,Phytochem.,9,(1970),2359	Baptisia	Fabaceae
Metabolite_2396	250.083	250.084	5.59816	C00010734	Allamcin;(+)-Allamcin	C13H14O5	Allamanda cathartica	Abe,Chem.Pharm.Bull.,32,(1984),2947	Allamanda	Apocynaceae
Metabolite_2179	236.142	236.141	-2.87558	C00013231	(+)-Oxyglutinosone;Oxyglutinosone;[3R-(3alpha,4beta,4abeta,6alpha)]-4,4a,5,6,7,8-Hexahydro-3,4a-dihydroxy-4-methyl-6-(1-methylethenyl)-2(3H)-naphthalenone	C14H20O3	Nicotiana glutinosa	Murai,Bull.Chem.Soc.Jpn.,53,(1980),1045	Nicotiana	Solanaceae
Metabolite_2432	252.101	252.1	-4.16473	C00000293	Grandinol	C13H16O5	Eucalyptus grandis	Crow,Tetrahedron Lett.,(1977),1073	Eucalyptus	Myrtaceae
Metabolite_4898	452.328	452.329	2.2588	C00023847	Ganoderic acid S;(22S,24E)-22-Acetoxy-3alpha-hydroxy-5alpha-lanosta-7,9(11),24-trien-26-oic acid	C30H44O3	Ganoderma lucidum	Hirotani,Chem.Pharm.Bull.,34,(1986),2282-2285	Ganoderma	Ganodermataceae
Metabolite_7422	636.272	636.268	-6.01638	C00027097	10,11-Dimethoxy-1-methyldeacetylpicraline-3',4',5'-trimethoxy-benzoate;10,11-Dimethoxy-1-methylburnamine 3',4',5'-trimethoxybenzoate	C34H40N2O10	Alstonia macrophylla	Kam,J.Nat.Prod.,67,(2004),547	Alstonia	Apocynaceae
Metabolite_4005	373.151	373.153	4.5931	C00024377	Cliviasindhine;O1-Acetyl-O2-(alpha-hydroxyethyl)lycorine	C20H23NO6	Clivia miniata Regel	Dopke,Z.Chem.,24,(1984),209	Clivia	Amaryllidaceae
Metabolite_5463	492.161	492.163	4.75084	C00007911	Okanin 3,4,3'-trimethyl ether 4'-glucoside	C24H28O11	Bidens torta	Harborne, The Handbook of Natural Flavonoids, 2, (1999), 115,Chalcones,dihydrochalcones and aurones;McCormick,Phytochem.,23,(1984),24	Bidens	Asteraceae
Metabolite_4701	438.348	438.35	4.69297	C00033123	Lucialdehyde A	C30H46O2	Ganoderma lucidum	Gao,Chem.Pharm.Bull.,50,(2002),837	Ganoderma	Ganodermataceae
Metabolite_1915	220.146	220.146	-0.42547	C00003135	Glutinosone	C14H20O2	Nicotiana tabacum L.	Kisaki,Phytochem.,7,(1968),323;Enzell,Tetrahedron Lett.,(1971),1983;Demole,Helv.Chim.Acta,56,(1973),265	Nicotiana	Solanaceae
Metabolite_2808	278.167	278.167	1.22867	C00036169	Multicaulin	C20H22O	Salvia blepharochlaena	Ulubelen,J.Nat.Prod.,64,(2001),549	Salvia	Labiatae
Metabolite_2817	279.124	279.126	7.90054	C00016262	(+)-Kurasoin B; Kurasoin B;(S)-3-Hydroxy-4-(1H-indol-3-yl)-1-phenyl-2-butanone	C18H17NO2	Paecilomyces sp. FO-3684	Uchida,J.Antibiotics 49,(1996),932	Paecilomyces	Trichocomaceae
Metabolite_5534	498.227	498.225	-3.52348	C00002425	Drumnondin A	C28H34O8	Hypericum drummondii	Harborne,Phytochemical Dictionary Second Edition,Taylor and Francis,(1999),Chapter34	Hypericum	Hypericaceae
Metabolite_4539	426.132	426.131	-0.600444	C00005057	5-Hydroxy-3,8-dimethoxy-3',4'-methylenedioxy-7-prenyloxyflavone	C23H22O8	Melicope triphylla	Harborne, The Handbook of Natural Flavonoids, 1, (1999), 181.Flavonols;Higa,Yakugaku Zasshi,110,(1990),822	Melicope	Rutaceae
Metabolite_6475	584.266	584.263	-3.48924	C00029828	Bilirubin;(Z,Z)-Bilirubin	C33H36N4O6	Bos taurus domesticus GMELIN	Yan,Chem.Pharm.Bull.,55,(2007),128	Bos	Bovidae
Metabolite_1426	192.042	192.042	1.22471	C00000548	1,3,6,8-Tetrahydroxynaphthalene;T4HN	C10H8O4	Colletotrichum lagenarium	Sankawa,Chem.Pharm.Bull,29,(1981),3586	Colletotrichum	Phyllachoraceae
Metabolite_2591	264.151	264.151	2.99719	C00029365	1,7-Diphenyl-4E-hepten-3-one	C19H20O	Alpinia officinarum	Yasukawa,J.Nat.Med.,62,(2008),374	Alpinia	Zingiberaceae
Metabolite_7779	656.16	656.159	-2.07164	C00005646	Patuletin 3-gentiobioside;Patuletin-3-O-beta-D-gentiobioside	C28H32O18	Brassica oleracea	Harborne, The Handbook of Natural Flavonoids, 1, (1999), 297.Flavonol O-glycosides;Smith,Phytochem.,10,(1971),3115;Aritomi,Phytochem.,25,(1986),231	Brassica	Cruciferae
Metabolite_9600	1078.6	1078.61	6.6819	C00041909	Symplocososide R;(-)-Symplocososide R	C57H90O19	Symplocos chinensis	Fu,J.Nat.Prod.,69,(2006),1680	Symplocos	Symplocaceae
Metabolite_7347	630.268	630.268	-1.10547	C00033408	Taxumairol H;(+)-Taxumairol H	C33H42O12	Taxus mairei (LEMEE & LEVL.) S.Y.Hu.	Shen,Chem.Pharm.Bull.,50,(2002),781	Taxus	Taxaceae
Metabolite_2028	226.122	226.121	-8.02442	C00000220	11-Hydroxyjasmonic acid	C12H18O4	Solanum demissum	Helder,Abstracts 14th International Conference on Plnat Growth Substances.Amsterdam,(1991),82	Solanum	Solanaceae
Metabolite_3793	352.262	352.261	-2.73635	C00003457	Montanol	C21H36O4	Montanoa tomentosa	Levine,J. Am. Chem. Soc.,101,(1979),3404	Montanoa	Asteraceae
Metabolite_4828	446.339	446.34	2.43404	C00007262	3-Dehydroteasterone	C28H46O4	Arabidopsis thaliana	Lange,Plant Mol.Biol.,51,(2003),925	Arabidopsis	Cruciferae
Metabolite_5952	534.212	534.21	-3.20402	C00000646	(-)-Arctiin	C27H34O11	Saussurea medusa	Xie,Chem.Pharm.Bull.,53,(2005),1416	Saussurea	Asteraceae
Metabolite_5953	534.213	534.215	4.9578	C00025640	(+)-2'-Norcocsoline; N-Demethylcocsoline	C33H30N2O5	Anisocycla cymosa Troupin	Kanyinda,J.Nat.Prod.,56,(1993),957	Anisocycla	Menispermaceae
Metabolite_3449	324.121	324.121	-1.60605	C00031925	Juglanoside A;(-)-Juglanoside A	C16H20O7	Juglans mandshurica	Liu,Chem.Pharm.Bull.,52,(2004),566	Juglans	Juglandaceae
Metabolite_6167	556.232	556.231	-2.11455	C00014913	Terreulactone D	C30H36O10	Aspergillus terreus Fb000501	Cho,J. Antibiotics,56,(2003),344	Aspergillus	Trichocomaceae
Metabolite_5919	532.199	532.2	1.31242	C00025665	(+)-Kurramine;Kurramine; O-Demethyl-1,2-dehydroapateline	C33H28N2O5	Cocculus pendulus (Forsk.) Diels	Hussain,Tetrahedron,40,(1984),2513	Cocculus	Menispermaceae
Metabolite_4815	446.088	446.088	-0.316689	C00003094	Paederoside	C18H22O11S	Saprosma scortechinii	Ling,J.Nat.Prod.,65,(2002),656	Saprosma	Rubiaceae
Metabolite_3462	326.164	326.165	1.37627	C00044734	Eiseniachloride A;(-)-Eiseniachloride A	C18H27ClO3	Eisenia bicyclis	Kousaka,J.Nat.Prod.,66,(2003),1318	Eisenia	Lessoniaceae
Metabolite_9558	1058.56	1058.57	3.05721	C00003530	Helianthoside A	C53H86O21	Helianthus annuus	Harborne,Phytochemical Dictionary Second Edition,Taylor and Francis,(1999),Chapter53	Helianthus	Asteraceae
Metabolite_3258	310.106	310.107	1.82774	C00016344	LK 6A;Lymphostin	C16H14N4O3	Streptomyces sp. KY11783	Nagata,J.Antibiotics 50,(1997),537	Streptomyces	Streptomycetaceae
Metabolite_5135	468.174	468.178	9.5996	C00013496	Artoindonesianin B;(+)-6,7-Dihydro-6-(1-hydroperoxy-1-methylethyl)-3,9-dihydroxy-11-methoxy-10-[(1E)-3-methyl-1-butenyl]-8H-[1]benzopyrano[3,2-d][1]benzoxepin-8-one	C26H28O8	Artocarpus champeden	Hakim,J.Nat.Prod.,62,(1999),613	Artocarpus	Moraceae
Metabolite_2573	264.1	264.1	-2.46091	C00002712	1'-Acetoxyeugenol acetate	C14H16O5	Alpinia galanga	Harborne,Phytochemical Dictionary Second Edition,Taylor and Francis,(1999),Chapter42	Alpinia	Zingiberaceae
Metabolite_3382	318.182	318.183	4.35526	C00012647	[4beta(Z)]-12,13-epoxytrichothec-9-en-4-ol 2-butenoate	C19H26O4	Trichothecium roseum	Godtfredsen,Acta Chem.Scand.,19,(1965),1088;Jarvis,Tetrahedron Lett.,(1980),787;Jarvis,J.Org.Chem.,47,(1982),1117	Trichothecium	Incertae sedis
Metabolite_5409	488.205	488.205	-0.595912	C00003716	Ichangin	C26H32O9	Citrus ichangensis	Harborne,Phytochemical Dictionary Second Edition,Taylor and Francis,(1999),Chapter58	Citrus	Rutaceae
Metabolite_8426	740.178	740.176	-2.76851	C00026837	Leptosin N1	C33H36N6O8S3	Leptoshaeria sp.OUPS-4	Yamada,Tetrahedron,58,(2002),479	0	0
Metabolite_5975	538.253	538.257	6.02806	C00008645	Kenusanone C	C31H38O8	Echinosophora koreensis	Harborne, The Handbook of Natural Flavonoids, 2, (1999), 767,Flavanones and dihydroflavonols;Iinuma,Phytohcem.,31,(1992),2855	0	0
Metabolite_6169	556.234	556.236	3.92635	C00024686	Bis-(7-hydroxygirinimbine) A	C36H32N2O4	Murraya euchrestifolia	T.S.Wu,Phytochem.,30,(1991),1052	Murraya	Rutaceae
Metabolite_3732	345.194	345.194	1.40446	C00007769	(E)-(4-Hydroxy-3-methoxycinnamoyl)epilupinine	C20H27NO4	Lupinus hirsutus	Ohmiya,The Alkaloids,47,(1995),1,Lupine alkaloids;Takamatsu,Phytochem.,29,(1990),3923	Lupinus	Fabaceae
Metabolite_5860	526.217	526.22	6.76359	C00018151	7beta,8beta-Epoxyroridin H	C29H34O9	Cylindrocarpon sp. PF-60	Matsumoto,J. Antibiotics,30,(1977),681	Cylindrocarpon	Nectriaceae
Metabolite_1205	180.08	180.079	-5.43817	C00000614	Coniferyl alcohol	C10H12O3	Stemona collinsae	Pacher,J.Nat.Prod.,65,(2002),820	Stemona	Stemonaceae
Metabolite_3652	338.103	338.103	-0.81608	C00026152	Thalidastine	C19H16NO5	Thalictrum rogosum	Wu-N.Wu,Lloydia,39,(1976),65; Mitscher,Lloydia,35,(1972),167	Thalictrum	Ranunculaceae
Metabolite_3581	334.085	334.084	-3.89121	C00009774	Sophoracoumestan A	C20H14O5	Sophora franchetiana	Harborne, The Handbook of Natural Flavonoids, 2, (1999), 517,Isoflavonoids and neoflavonoids;Komatsu,Chem.Pharm.Bull.,29,(1981),532	Sophora	Fabaceae
Metabolite_9291	974.513	974.509	-4.59577	C00029712	Aquilegioside H	C48H78O20	Aquilegia vulgaris L	Nishida,Chem.Pharm.Bull.,51,(2003),683;Nishida,Chem.Pharm.Bull.,51,(2003),956	Aquilegia	Ranunculaceae
Metabolite_5920	532.193	532.194	2.32681	C00005833	Icaritin 3-rhamnoside	C27H32O11	Epimedium sagittatum	Harborne, The Handbook of Natural Flavonoids, 1, (1999), 297.Flavonol O-glycosides;Phytochem.,26,(1987),861	Epimedium	Berberidaceae
Metabolite_1481	194.08	194.079	-3.01613	C00001157	L- Bornesitol	C7H14O6	Rhamnus spp.	Harborne,Phytochemical Dictionary Second Edition,Taylor and Francis,(1999),Chapter4	Rhamnus	Rhamnaceae
Metabolite_5155	470.227	470.225	-4.7708	C00049812	Maculalactone G;(+)-Maculalactone G	C34H30O2	Kyrtuthrix maculans	Lee,J.Nat.Prod.,61,(1998),29	0	0
Metabolite_3651	338.1	338.1	1.90477	C00002717	1-Caffeoyl-4-deoxyquinic acid	C16H18O8	Arachis paraguariensis	Harborne,Phytochemical Dictionary Second Edition,Taylor and Francis,(1999),Chapter42	Arachis	Fabaceae
Metabolite_2033	226.159	226.157	-9.8559	C00000226	(+)-9,10-Dihydro-7-iso-jasmonic acid	C13H22O3	Botryodiplodia theobromae	Aldridge,J. Chem. Soc.,(1971),1623	Botryodiplodia	Incertae sedis
Metabolite_1536	196.109	196.11	4.69547	C00016856	Germicidin	C11H16O3	Streptomyces viridochromogenes NRRL B-1551	Petersen,J.Antibiotics 46,(1993),1126	Streptomyces	Streptomycetaceae
Metabolite_946	162.068	162.068	1.57968	C00002753	Isosafrole	C10H10O2	Cananga odorata	Harborne,Phytochemical Dictionary Second Edition,Taylor and Francis,(1999),Chapter42	Cananga	Annonaceae
Metabolite_1290	184.075	184.074	-8.44271	C00007299	Phosphorylcholine	C5H15NO4P	Arabidopsis thaliana	Tasseva,FEBS Letters,566,(2004),115	Arabidopsis	Cruciferae
Metabolite_1380	189.102	189.1	-9.0723	C00002013	Alexine	C8H15NO4	Alexa leiopetala	Harborne,Phytochemical Dictionary Second Edition,Taylor and Francis,(1999),Chapter25	Alexa	Fabaceae
Metabolite_1863	218.059	218.058	-3.73635	C00002794	Aristolindiquinone	C12H10O4	Aristolochia indica	Harborne,Phytochemical Dictionary Second Edition,Taylor and Francis,(1999),Chapter43	Aristolochia	Aristolochiaceae
Metabolite_1811	212.07	212.068	-4.95149	C00002692	Danielone	C10H12O5	Carica papaya	Harborne,Phytochemical Dictionary Second Edition,Taylor and Francis,(1999),Chapter41	Carica	Caricaceae
Metabolite_1953	222.09	222.089	-2.76741	C00002714	Apiol;Parsley apiole;Apiole	C12H14O4	Cinnamomum camphora	Harborne,Phytochemical Dictionary Second Edition,Taylor and Francis,(1999),Chapter42	Cinnamomum	Lauraceae
Metabolite_2452	254.15	254.152	7.41936	C00018425	Gliocladic acid	C14H22O4	Gliocladium virens SANK 12679	Itoh,J. Antibiotics,35,(1982),541	Gliocladium	Hypocreaceae
Metabolite_1666	206.093	206.094	4.22508	C00002758	p-Methoxycinnamic acid ethyl ester	C12H14O3	Hedychium spicatum	Harborne,Phytochemical Dictionary Second Edition,Taylor and Francis,(1999),Chapter42	Hedychium	Zingiberaceae
Metabolite_2587	264.147	264.147	0.639686	C00002780	Subaphyllin	C14H20N2O3	Citrus paradisi	Harborne,Phytochemical Dictionary Second Edition,Taylor and Francis,(1999),Chapter42	Citrus	Rutaceae
Metabolite_1601	202.136	202.136	1.19547	C00013215	Dehydrochamecynenol;(-)-Dehydrochamecynenol;[4aS-(4aalpha,7alpha,8aalpha)]-7-Ethynyl-4a,5,6,7,8,8a-hexahydro-4a-methyl-1-naphthalenemethanol	C14H18O	Chamaecyparis formosensis	Asao,Tetrahedron Lett.,(1968),3639	Chamaecyparis	Cupressaceae
Metabolite_1914	220.115	220.113	-6.987	C00018794	0AP Silane 55;AY 43-026;AZ 6137;GOPS MDM;S 520;SH 6023;Sila-Ace S 520;TSL 8355	C9H20O4Si	Streptomyces diastaticus S-520	Shoji,J. Antibiotics 23,(1970),429	Streptomyces	Streptomycetaceae
Metabolite_1760	210.053	210.053	-1.42877	C00007336	5-Hydroxyferulic acid	C10H10O5	Arabidopsis thaliana	Chapple,Plant Cell.,4,(1992),1413	Arabidopsis	Cruciferae
Metabolite_1289	184.073	184.074	5.08125	C00002637	3,4,5-Trimethoxyphenol;Antiarol	C9H12O4	Antiaris toxicaria	Harborne,Phytochemical Dictionary Second Edition,Taylor and Francis,(1999),Chapter40	Antiaris	Moraceae
Metabolite_3912	362.156	362.158	5.1328	C00010560	[3R-(3alpha,3aalpha,4beta,5alpha,6aalpha)]-4-[(beta-D-Gulucopyranosyloxy)methyl]hexsahydro-3-(hydroxymethyl)-5-methyl-2H-cyclopenta[b]furan-2-one	C16H26O9	Gelsemium sempervirens	Jensen,Phytochem.,26,(1987),1725	Gelsemium	Gelsemiaceae
Metabolite_5758	518.218	518.215	-5.83974	C00003354	Provincialin	C27H34O10	Liatris provincialis	Harborne,Phytochemical Dictionary Second Edition,Taylor and Francis,(1999),Chapter51	Liatris	Asteraceae
Metabolite_5683	512.24	512.241	2.13684	C00015476	Arisugacin D	C29H36O8	Penicillium sp. FO-4259-11	Otoguro,J.Antibiotics 53,(2000),50	Penicillium	Trichocomaceae
Metabolite_7963	672.311	672.308	-4.39474	C00040280	Serinocyclin A;(+)-Serinocyclin A	C27H44N8O12	Metarhizium anisopliae	Krasnoff,J.Nat.Prod.,70,(2007),1919	Metarhizium	Clavicipitaceae
Metabolite_3953	368.112	368.111	-3.23628	C00020432	2beta,3beta-Epoxybishopantholide	C17H20O9	Bishopanthus soliceps	Singh,Phytochem.,24,(1985),2110	Bishopanthus	Asteraceae
Metabolite_7260	624.149	624.148	-1.3105	C00004325	Luteolin 7-(6''-ferulylglucoside)	C31H28O14	Salix gilgiana	Harborne, The Handbook of Natural Flavonoids, 1, (1999), 3.Flavone O-glycosides, John Wiley & Son;Mizuno,Phytochem.,26,(1987),2418	Salix	Salicaceae
Metabolite_5656	508.195	508.194	-0.31815	C00000279	Ponalactone A glucoside;O-beta-D-Glucosyl ponalactone A	C25H32O11	Podocarpus nakaii	Kupchan,Experientia,31,(1978),137	Podocarpus	Podocarpaceae
Metabolite_4874	449.107	449.108	4.14815	C00002374	Cyanidin 3-O-glucoside;Chrysanthemin	C21H21O11	Sinarundinaria spp.	Fossen,Biochem.Syst.Ecol.,30,(2002),855	Sinarundinaria	Poaceae
Metabolite_7262	624.204	624.205	1.75733	C00002744	Forsythiaside;Forsythoside A	C29H36O15	Isoplexis chalcantha	Taskova,Phytochem.,66,(2005),1440	Isoplexis	Plantaginaceae
Metabolite_505	134.111	134.11	-7.25602	C00003040	p-Cymene	C10H14	Cinnamomum illicioides	Giang,J.Nat.Med.,60,(2006),248	Cinnamomum	Lauraceae
Metabolite_3969	370.202	370.202	0.0265841	C00025977	O,O'-Dimethylmagnoflorine	C22H28NO4	Pachygone ovata Miers	Bhat,J.Nat.Prod.,43,(1980),588	Pachygone	Menispermaceae
Metabolite_5340	484.211	484.211	-0.347238	C00016794	15b beta-Hydroxy-N-acetylardeemine	C28H28N4O4	Aspergillus fischeri var. brasiliensis	Hochlowski,J.Antibiotics 46,(1993),380	Aspergillus	Trichocomaceae
Metabolite_4814	446.082	446.085	6.92216	C00001024	Baicalin;Baicalein 7-glucuronide	C21H18O11	Scutellaria lateriflora	Makino,J.Nat.Med.,62,(2008),294	Scutellaria	Labiatae
Metabolite_4488	422.086	422.085	-2.39793	C00002962	Aphloiol;Mangiferin;2-beta-D-Glucopyranosyl-1,3,6,7-tetrahydroxy xanthone	C19H18O11	Hedysarum sericeum	Alaniya,Khim.Prir.Soedin.,(1983),646	Hedysarum	Fabaceae
Metabolite_7126	620.251	620.252	1.65734	C00025237	(-)-Curicycleatjine	C37H36N2O7	Cyclea atjehensis Forman	Tantisewie,J.Nat.Prod.,53,(1990),553	Cyclea	Menispermaceae
Metabolite_4487	422.083	422.083	0.043564	C00007451	alpha,alpha-Trehalose 6-phosphate	C12H23O14P	Arabidopsis thaliana	Avonce,Plant Physiol.,136,(2004),3649	Arabidopsis	Cruciferae
Metabolite_5475	494.322	494.324	4.71406	C00003660	Makisterone B	C28H46O7	Podocarpus macrophyllus	Ohmoto,Chem.Pharm.Bull.,28,(1980),1894;Hayashi,Tetrahedron Lett.,(1972),3385	Podocarpus	Podocarpaceae
Metabolite_5502	496.251	496.253	5.62335	C00016652	Antibiotic KO 8119C;Cytosaminomycin C	C23H36N4O8	Streptomyces anakusaensis KO-8119	Haneda,J.Antibiotics 47,(1994),774	Streptomyces	Streptomycetaceae
Metabolite_4540	426.152	426.153	0.641799	C00020028	Tortuoside	C20H26O10	Seseli tortuosum	Ceccherelli,J. Nat. Prod.,52,(1989),888	Seseli	Apiaceae
Metabolite_4317	402.152	402.153	1.67475	C00031877	Icariside F2;Benzyl beta-D-Apiofuranosyl-(1->6)-O-beta-D-glucopyranoside	C18H26O10	Bupleurum falcatum L.	Ono,Phytochem.,51,(1999),819	Bupleurum	Apiaceae
Metabolite_4612	431.195	431.194	-0.745046	C00016336	Fusarin C	C23H29NO7	Nectria coccinea A56-95	Eilbert,J.Antibiotics 50,(1997),443	Nectria	Hypocreaceae
Metabolite_5345	484.241	484.243	4.11906	C00028983	Segetalin B;Vaccarin A	C24H32N6O5	Vaccaria segetalis	Itokawa,Planta Med.,61,(1995),561	Vaccaria	Caryophyllaceae
Metabolite_4151	386.181	386.182	2.38155	C00000874	Aplysin 20	C20H35BrO2	Marginosporum aberrans	Ohta,Phytochem.,16,(1977),1085	0	0
Metabolite_5341	484.216	484.214	-3.88304	C00017787	Bagougeramine A	C17H28N10O7	Bacillus circulans TB-2125	Takahashi,J.Antibiotics,39,(1986),1033	Bacillus	Bacillaceae
Metabolite_7489	638.217	638.221	6.49775	C00014349	4'-Hydroxy-5,7,2'-trimethoxyflavanone 4'-rhamnosyl-(1->6)-glucoside	C30H38O15	Terminalia alata	Srivastava,Fitoterapia,72,(2001),106	Terminalia	Combretaceae
Metabolite_7183	622.279	622.278	-2.45226	C00038289	5-Cinnamoyltaxicin I triacetate	C35H42O10	Taxus baccata	Shi,J.Nat.Prod.,67,(2004),108	Taxus	Taxaceae
Metabolite_5604	504.162	504.163	2.25758	C00003730	Sergeolide	C25H28O11	Picrolemma pseudocoffea	Harborne,Phytochemical Dictionary Second Edition,Taylor and Francis,(1999),Chapter58	Picrolemma	Simaroubaceae
Metabolite_4312	402.114	402.116	6.68463	C00010555	10-Dehydrogardenoside	C17H22O11	Randia canthioides	Uesato,Phytochem.,21,(1982),353	Randia	Rubiaceae
Metabolite_4284	400.185	400.189	7.90897	C00002596	Deoxygomisin A	C23H28O6	Schisandra chinensis	Harborne,Phytochemical Dictionary Second Edition,Taylor and Francis,(1999),Chapter39	Schisandra	Schisandraceae
Metabolite_5215	474.243	474.241	-4.2159	C00004023	Rubraflavone B	C30H34O5	Morus rubra	Harborne, The Handbook of Natural Flavonoids, 1, (1999), 2.Flavones, John Wiley & Son;Deshpande,Indian J.Chem.,12,(1974),431	Morus	Moraceae
Metabolite_6128	552.273	552.274	1.14458	C00001995	Canthiumine	C33H36N4O4	Canthium euryoides	Harborne,Phytochemical Dictionary Second Edition,Taylor and Francis,(1999),Chapter24	Canthium	Rubiaceae
Metabolite_6125	552.27	552.272	4.15503	C00020977	Handelin	C32H40O8	Handelia trichophylla	Tarasov,Khim. Prir. Soedin.,(1976),745	Handelia	Asteraceae
Metabolite_8347	722.423	722.424	1.66647	C00003598	Yamogenin 3-O-neohesperidoside	C39H62O12	Asparagus plumosus	Harborne,Phytochemical Dictionary Second Edition,Taylor and Francis,(1999),Chapter54	Asparagus	Asparagaceae
Metabolite_6404	580.388	580.392	6.41287	C00000929	Phenicoxanthin;all-trans-Adonirubin	C40H52O3	Adonis annua	Egger,Phytochem.,4,(1965),609	Adonis	Ranunculaceae
Metabolite_6473	584.262	584.262	0.383305	C00024100	Swietemahonin E	C32H40O10	Swietenia mahagoni JACQ.	Kadota S.,Tetrahedron Lett.,30,(1989),1111-1114;Kadota S.,Chem.Pharm.Bull.,38,(1990),894-901;Ekimoto H.,Planta Med.,57,(1991),56-58	Swietenia	Meliaceae
Metabolite_3439	323.153	323.152	-1.79483	C00002164	Galipine	C20H21NO3	Cusparia febrifuga	Harborne,Phytochemical Dictionary Second Edition,Taylor and Francis,(1999),Chapter27	Cusparia	Rutaceae
Metabolite_3367	318.04	318.038	-7.72315	C00001071	Myricetin	C15H10O8	Melilotus italica	Jurzysta,Can. J. Bot.,66,(1988),363	Melilotus	Fabaceae
Metabolite_6131	552.302	552.297	-9.61196	C00046781	Isomalyngamide A;(-)-Isomalyngamide A	C29H45ClN2O6	Lyngbya majuscula	Kan,J.Nat.Prod.,63,(2000),1599	0	0
Metabolite_5078	464.208	464.205	-6.87397	C00011772	7-(Acetyloxy)-2,3,3a,4,5,6,7,8,9,11a-decahydro-10-methyl-3,6-bis(methylene)-2-oxocyclodeca[b]furan-4-yl ester 3-(acetyloxy)-2-hydroxy-2-methyl-butanoic acid	C24H32O9	Ursinia anthemoides	Kroszczynski,Coolect.Czech.Chem.Commun.,50,(1985),94	Ursinia	Asteraceae
Metabolite_6301	568.306	568.305	-2.23076	C00001989	Adouetine Y	C34H40N4O4	Discaria americana	Giacomelli,J.Nat.Prod.,64,(2001),997	Discaria	Rhamnaceae
Metabolite_3065	294.161	294.162	2.91131	C00015155	MF-EA 705alpha	C20H22O2	Streptomyces sp.	Qureshi,J.Antibiotics 54,(2001),1100	Streptomyces	Streptomycetaceae
Metabolite_6300	568.302	568.304	3.15823	C00023904	Helvolic acid;Fumigacin	C33H44O8	Aspergillus fumigatus	Cole,Handbook of Toxic Fungal Metabolites ;Academic Press,New York,(1981),806-809;Turner,Fungal Metabolites II;Academic Press,New York,NY,(1983),324-328	Aspergillus	Trichocomaceae
Metabolite_3230	307.087	307.084	-9.33176	C00026005	Pareirubrine B	C18H13NO4	Cissampelos pareira L.	Morita,Chem.Pharm.Bull.,41,(1993),1418	Cissampelos	Menispermaceae
Metabolite_2991	290.187	290.188	5.75884	C00000410	Ecklonialactone A	C18H26O3	Ecklonia stolonifera	Kurata,Chem.Lett,(1989),267	Ecklonia	Lessoniaceae
Metabolite_6148	554.292	554.294	2.73864	C00031350	Sedumoside A5;(-)-Sedumoside A5	C25H46O13	Sedum sarmentosum	Ninomiya,Chem.Pharm.Bull.,55,(2007),1185	Sedum	Crassulaceae
Metabolite_6166	556.215	556.216	1.20042	C00032362	Tinosineside A	C26H36O13	Tinospora sinensis	Li,Chem.Pharm.Bull.,52,(2004),638	Tinospora	Menispermaceae
Metabolite_6241	564.4	564.397	-5.1252	C00000922	Canthaxanthin;beta-Carotene-4,4'-dione	C40H52O2	Tolypothrix tenuis	Harborne,Phytochemical Dictionary Second Edition,Taylor and Francis,(1999),Chapter60	0	0
Metabolite_3486	328.154	328.155	3.83858	C00027111	1,2-Dehydroreticuline	C19H22NO4	Xylopia parviflora	Nishiyama,Phytochem.,65,(2004),939	Xylopia	Annonaceae
Metabolite_4931	456.107	456.106	-2.36061	C00008869	Epicatechin 3-O-(3-O-methylgallate)	C23H20O10	Camellia sinensis	Harborne, The Handbook of Natural Flavonoids, 2, (1999), 355,Flavans and proanthocyanidins;Saijo,Agric.Biol.Chem.,46,(1982),1969;Nonaka,Chem.Pharm.Bull.,31,(1983),3906	Camellia	Theaceae
Metabolite_6954	610.299	610.299	-0.649867	C00040876	Areptin A	C31H46O12	Ajuga reptans	Malakov,Phytochem.,49,(1998),2443	Ajuga	Labiatae
Metabolite_8615	782.222	782.227	6.41788	C00005903	Kaempferol 3-rhamnosyl-(1->3)(4'''-acetylrhamnosyl)(1->6)-galactoside	C35H42O20	Rhamnus thymifolius	Harborne, The Handbook of Natural Flavonoids, 1, (1999), 297.Flavonol O-glycosides;Satake,Chem.Pharm.Bull.,41,(1993),1743	Rhamnus	Rhamnaceae
Metabolite_6955	610.302	610.304	4.03658	C00025606	Daurisoline;(-)-Daurisoline;(R,R)-Daurisoline	C37H42N2O6	Menispermum dauricum DC.	Gong,Yao Hsueh Hsueh Pao,14,(1979),439	Menispermum	Menispermaceae
Metabolite_3791	352.118	352.118	1.63054	C00001818	Berberastine	C20H18NO5	Berberis laurina	Harborne,Phytochemical Dictionary Second Edition,Taylor and Francis,(1999),Chapter21	Berberis	Berberidaceae
Metabolite_8154	692.288	692.283	-6.13431	C00000504	Torreyanic acid	C38H44O12	Pestalotiopsis microspora	Lee,J.Org.Chem,61,(1996),3232	Pestalotiopsis	Amphisphaeriaceae
Metabolite_3618	336.083	336.084	3.57845	C00045950	Flustraminol A	C16H21BrN2O	Flustra foliacea	Peters,J.Nat.Prod.,65,(2002),1633	0	0
Metabolite_2842	280.146	280.146	2.5213	C00015591	5-Hydroxy-2,2-dimethyl-7-(2-phenylethyl)chromene	C19H20O2	Radula kojana	Asakawa,Phytochem.,30,(1991),219	0	0
Metabolite_4930	456.105	456.105	-0.019202	C00019686	FMN;Riboflavine 5'-phosphate;Flavin mononucleotide	C17H21N4O9P	Escherichia coli	Gerdes,J. Bacteriol.,184,(2002),4555	Escherichia	Enterobacteriaceae
Metabolite_6879	608.242	608.247	8.16744	C00031743	Dichotomoside B;(+)-Dichotomoside B	C30H40O13	Stellaria dichotoma L.var.lanceolata	Morikawa,Chem.Pharm.Bull.,52,(2004),1194	Stellaria	Caryophyllaceae
Metabolite_5175	472.16	472.158	-4.33581	C00010733	beta-Allamcidin glucoside	C21H28O12	Allamanda neriifolia	Abe,Chem.Pharm.Bull.,32,(1984),2947	Allamanda	Apocynaceae
Metabolite_4964	458.194	458.194	0.751618	C00011994	Zinaflorin I	C25H30O8	Zinnia peruviana	Bohlmann,Phytochem.,18,(1979),1343;Ortega,Chem.Lett.,(1983),1607	Zinnia	Asteraceae
Metabolite_5062	463.242	463.239	-6.00018	C00045902	Epothilone C1;(-)-Epothilone C1	C25H37NO5S	Sorangium cellulosum	Hardt,J.Nat.Prod.,64,(2001),847	0	0
Metabolite_5087	465.099	465.103	8.33705	C00006698	Myrtillin;Delphinidin 3-O-beta-D-glucopyranoside	C21H21O12	Elymus spp.	Fossen,Biochem.Syst.Ecol.,30,(2002),855	Elymus	Poaceae
Metabolite_1106	174.069	174.068	-5.99757	C00000159	(Z,Z)-Marticaria ester	C11H10O2	Grindelia paludosa	Bohlmann,Phytochem.,21,(1982),167	Grindelia	Asteraceae
Metabolite_7264	624.286	624.284	-3.7994	C00025321	(-)-Limacine 2'-beta-N-oxide;Limacine 2'-beta-N-oxide	C37H40N2O7	Anisocycla jollyana (Pierre) Diels	Kanyinda,J.Nat.Prod.,58,(1995),1587	Anisocycla	Menispermaceae
Metabolite_1911	220.11	220.11	-0.814007	C00002440	Precocene 2	C13H16O3	Ageratina aromatica	Harborne,Phytochemical Dictionary Second Edition,Taylor and Francis,(1999),Chapter34	Ageratina	Asteraceae
Metabolite_5321	482.147	482.142	-9.53505	C00003076	Catalposide	C22H26O12	Paederota lutea	Albach,Phytochem.,65,(2004),2129	Paederota	Plantaginaceae
Metabolite_9201	962.537	962.545	8.00679	C00029442	20-Glucoginsenoside Rf	C48H82O19	Panax notoginseng	Wang,J.Nat.Med.,60,(2006),97	Panax	Araliaceae
Metabolite_1832	214.121	214.121	-3.80386	C00010284	Citeodiol	C11H18O4	Penicillium citreo-viride B	Shizuri,Tetrahedron Lett.,25,(1984),4771	Penicillium	Trichocomaceae
Metabolite_1839	216.114	216.115	6.50675	C00013228	Liguhodgsonal;(R)-5,6,7,8-Tetrahydro-3-hydroxy-7-(1-methylethenyl)-1-naphthalenecarboxaldehyde	C14H16O2	Ligularia brachyphylla	Klasek,Collect.Czech.Chem.Commun.,36,(1971),2205;Bohlmann,Chem.Ber.,110,(1977),2640	Ligularia	Asteraceae
Metabolite_1896	220.039	220.037	-6.59062	C00003013	Purpurogallin	C11H8O5	Dryophanta divisa	Harborne,Phytochemical Dictionary Second Edition,Taylor and Francis,(1999),Chapter47	0	0
Metabolite_5562	500.242	500.241	-2.20978	C00024176	Heteroclitin A;(+)-Heteroclitin A	C28H36O8	Kadsura heteroclita (ROXB.) CRAIB.	Chen,Phytochem.,31,(1992),629-632;Yang,Chem.Pharm.Bull.,40,(1992),1510-1516	Kadsura	Schisandraceae
Metabolite_6005	540.271	540.272	2.02621	C00030234	Euphornin C	C31H40O8	Euphorbia helioscopia L.	Zhang,Chem.Pharm.Bull.,54,(2006),1037	Euphorbia	Euphorbiaceae
Metabolite_6004	540.278	540.278	-0.268641	C00024697	Chrestifoline C	C37H36N2O2	Murraya euchrestifolia	Ito,Chem.Pharm.Bull.,38,(1990),1143	Murraya	Rutaceae
Metabolite_6936	610.098	610.098	-0.837004	C00034486	Dolabellin	C24H32Cl2N2O8S2	Lyngbya majuscula	Tan,Phytochem.,68,(2007),954	0	0
Metabolite_1635	204.081	204.082	6.81863	C00007643	2-Oxo-8-methylthiooctanoic acid;8-Methylthio-2-octanoic acid	C9H16O3S	Arabidopsis thaliana	Textor,Planta,218,(2004),1026	Arabidopsis	Cruciferae
Metabolite_5866	526.255	526.257	2.55511	C00014389	Kosamol A;3,5,7,2',4'-Pentahydroxy-6-(3-hydroxy-3-methylbutyl)-8-lavandulylflavanone	C30H38O8	Sophora flavescens	Ryu,Planta Med.,62,(1996),361	Sophora	Fabaceae
Metabolite_5871	526.26	526.262	4.18954	C00024722	Murrafoline C	C36H34N2O2	Murraya euchrestifolia	Furukawa,Chem.Pharm.Bull.,33,(1985),2611	Murraya	Rutaceae
Metabolite_5888	528.372	528.376	6.77167	C00022801	3,3',4,4',7,7',8,8'-Octadehydro-beta,beta-carotene	C40H48	Euglena gracilis	Fiksdahl,Phytochem.,27,(1988),1447	Euglena	Euglenaceae
Metabolite_6081	546.138	546.137	-1.24992	C00004490	Scutellarein 4'-methyl ether 7-(2'',6''-diacetylalloside)	C26H26O13	Sideritis perfoliata	Harborne, The Handbook of Natural Flavonoids, 1, (1999), 3.Flavone O-glycosides, John Wiley & Son;Ezer,Int.J.Pharmacogn.,30,(1992),61	Sideritis	Labiatae
Metabolite_6835	606.285	606.284	-1.48972	C00000332	Methyl pheophorbide a	C36H38N4O5	Diospyros kaki	Hayashi,Syokubutu kagaku kennkyukai syouwa 52-nendo taikai kenkyu hapyo kiroku syuu,(1977),9	Diospyros	Ebenaceae
Metabolite_6834	606.281	606.283	3.39675	C00036219	Taxinine	C35H42O9	Taxus mairei	Baloglu,J.Nat.Prod.,62,(1999),1448	Taxus	Taxaceae
Metabolite_6347	572.264	572.262	-2.40458	C00024040	Scuterivulactone C2 3-O-acetate	C31H40O10	Scutellaria rivularis Wall.	Kikuchi,Chem.Lett.,(1987),987-990;Kizu H.,Chem.Pharm.Bull.,45,(1997),152-160	Scutellaria	Labiatae
Metabolite_6357	574.258	574.257	-2.36019	C00035055	Barbatin A;(-)-Barbatin A	C34H38O8	Scutellaria barbata D	Dai,Phytochem.,67,(2006),1326	Scutellaria	Labiatae
Metabolite_6250	566.247	566.252	8.05166	C00047910	Granatumin C;(+)-Granatumin C	C32H38O9	Xylocarpus granatum	Li,J.Nat.Prod.,72,(2009),2110	Xylocarpus	Meliaceae
Metabolite_6147	554.29	554.289	-0.573378	C00002001	Integerressine	C33H38N4O4	Ceanothus integerrimus	Harborne,Phytochemical Dictionary Second Edition,Taylor and Francis,(1999),Chapter24	Ceanothus	Rhamnaceae
Metabolite_6113	550.2	550.2	-1.06271	C00031128	Raocyclamide A	C27H30N6O5S	Oscillatoria raoi	Harada,Chem.Pharm.Bull.,52,(2004),889	0	0
Metabolite_5617	504.202	504.2	-5.50636	C00011791	[3aR-[3aR*,4R*(E),6E,9S*,10Z,11aR*]]-9-(Acetyloxy)-2,3,3a,4,5,8,9,11a-octahydro-6,10-dimethyl-3-methylene-2-oxocyclodeca[b]furan-4-yl ester 4-(acetyloxy)-2-[(acetyloxy)methyl]-2-butenoic acid;Hiyodarilactone F	C26H32O10	Eupatorium sachalinense	Takahashi,Chem.Pharm.Bull.,27,(1979),2539	Eupatorium	Asteraceae
Metabolite_5589	502.332	502.335	5.32674	C00026708	Caulindole C	C36H42N2	Isolona cauliflora	Makangara,Phytochem.,65,(2004),227	Isolona	Annonaceae
Metabolite_1690	208.039	208.041	5.86749	C00007647	2-(2'-Methylthio)ethylmalic acid	C7H12O5S	Arabidopsis thaliana	Textor,Planta,218,(2004),1026	Arabidopsis	Cruciferae
Metabolite_1693	208.039	208.037	-7.45146	C00002473	Fraxetin	C10H8O5	Hydrangea vestita	Talapatra,J.Indian Chem.Soc.,52,(1975),1222	Hydrangea	Hydrangeaceae
Metabolite_5800	520.338	520.34	3.22931	C00003692	Cucurbitacin P	C30H48O7	Brandegea bigelovii	Harborne,Phytochemical Dictionary Second Edition,Taylor and Francis,(1999),Chapter57	Brandegea	Cucurbitaceae
Metabolite_5836	524.241	524.241	0.943418	C00020971	Artelein	C30H36O8	Artemisia leucodes	Mallabaev,Khim. Prir. Soedin.,22,(1986),42	Artemisia	Asteraceae
Metabolite_5642	506.18	506.179	-2.78903	C00010507	Campsiside	C25H30O11	Campsis chinensis	Imakura,Chem.Pharm.Bull,33,(1985),2220	Campsis	Bignoniaceae
Metabolite_7961	672.279	672.278	-1.38641	C00033970	Ixerin Q;(-)-Ixerin Q	C35H44O13	Ixeris stolonifera A.Gray	Zidorn,Phytochem.,69,(2008),2270	Ixeris	Asteraceae
Metabolite_4007	373.224	373.225	3.44279	C00025007	Spirasine VII	C22H31NO4	Spiraea japonica	Sun,Heterocycles,24,(1986),2105	Spiraea	Rosaceae
Metabolite_4092	381.998	381.999	4.82651	C00004355	6-Hydroxyluteolin 7-sulfate	C15H10O10S	Lippia canescens	Harborne, The Handbook of Natural Flavonoids, 1, (1999), 3.Flavone O-glycosides, John Wiley & Son;Tomas-Barberan,Phytochem.,26,(1987),2281	Lippia	Verbenaceae
Metabolite_8011	678.434	678.434	0.110036	C00035849	Kahiricoside III;(+)-Kahiricoside III	C38H62O10	Astragalus kahiricus	Radwan,Phytochem.,65,(2004),2909	Astragalus	Fabaceae
Metabolite_979	164.046	164.047	7.44038	C00000152	p-Coumaric acid	C9H8O3	Lens esculenta	El-Negoumy,Rev.Latinoam.Quim.,18,(1987),88	Lens	Fabaceae
Metabolite_565	138.032	138.032	-3.11153	C00000206	Salicylic acid;2-Carboxyphenol;Saligel;Salonil;o-Hydroxybenzoic acid	C7H6O3	Populus pseudosimonii	Pei,Zhongcaoyao,14,(1983),433	Populus	Salicaceae
Metabolite_4472	420.122	420.121	-2.19116	C00004054	5-O-Methylhoslundin;5,7-Dimethoxy-6-(5-methoxy-6-methyl-4-oxo-4H-pyran-3-yl)-2-phenyl-4H-1-benzopyran-4-one	C24H20O7	Bidens pilosa	Sarker,Biochem.Syst.Ecol.,28,(2000),591	Bidens	Asteraceae
Metabolite_4637	433.171	433.174	5.17875	C00027362	Fenfangjine G	C22H27NO8	Stephania tetrandra	Ogino,Heterocycles,48,(1998),311	Stephania	Menispermaceae
Metabolite_4698	438.238	438.241	6.84703	C00000895	Scopadulcic acid B	C27H34O5	Scoparia dulcis	Hayashi,Phytochem.,30,(1991),3617	Scoparia	Plantaginaceae
Metabolite_7486	638.106	638.112	8.60426	C00004288	Luteolin 7-glucuronosyl-(1->2)-glucuronide	C27H26O18	Elodea canadensis	Harborne, The Handbook of Natural Flavonoids, 1, (1999), 3.Flavone O-glycosides, John Wiley & Son;Mues,Biochem.Syst.Ecol.,11,(1983),261	Elodea	Hydrocharitaceae
Metabolite_2326	246.163	246.162	-4.23949	C00002650	Geranylhydroquinone	C16H22O2	Cordia eleagnoides	Harborne,Phytochemical Dictionary Second Edition,Taylor and Francis,(1999),Chapter40	Cordia	Boraginaceae
Metabolite_4316	402.144	402.147	5.96863	C00009937	Ulexone B	C25H22O5	Ulex europaeus	Harborne, The Handbook of Natural Flavonoids, 2, (1999), 517,Isoflavonoids and neoflavonoids;Russell,Phytochem.,29,(1990),1287	Ulex	Fabaceae
Metabolite_4252	396.215	396.215	-0.555687	C00031987	Lushanrubescensin F;(-)-Lushanrubescensin F	C21H32O7	Isodon parvifolius	Li,J.Nat.Prod.,69,(2006),645	Isodon	Labiatae
Metabolite_3062	294.146	294.147	1.36077	C00000236	Pyrethrosine	C16H22O5	Chrysanthemum cinerariifolium	Shibaoka,Plant Cell Physiol.,8,(1967),161	Chrysanthemum	Asteraceae
Metabolite_782	150.069	150.068	-6.29038	C00000613	p-Coumaryl alcohol	C9H10O2	Arabidopsis thaliana	Kim,PNAS,101,(2004),1455	Arabidopsis	Cruciferae
Metabolite_3031	292.157	292.158	2.87423	C00024303	(+)-Rauflorine	C19H20N2O	Rauvolfia confertiflora	Danieli,Chim.Ind.(Milan),53,(1971),1042	Rauvolfia	Apocynaceae
Metabolite_8551	772.189	772.185	-5.36734	C00004396	6-Hydroxyluteoin-7-(6'''-p-coumarylsophoroside)	C36H36O19	Globularia elongata	Harborne, The Handbook of Natural Flavonoids, 1, (1999), 3.Flavone O-glycosides, John Wiley & Son;Klimek,Phytochem.,27,(1988),255	Globularia	Globulariaceae
Metabolite_900	159.091	159.09	-8.04741	C00001345	(-)-Betonicine;4-Hydroxyproline betaine	C7H13NO3	Marrubium vulgare	Harborne,Phytochemical Dictionary Second Edition,Taylor and Francis,(1999),Chapter10	Marrubium	Labiatae
Metabolite_2887	284.164	284.162	-5.45347	C00012823	Odontin;(3alpha,4aalpha,5alpha,6beta,8abeta)-Octahydro-3-hydroperoxy-5,6-dihydroxy-5,8a-dimethyl-3-(1-methylethenyl)-2(1H)-naphthalenone	C15H24O5	Pluchea arguta	Ahmad,J.Nat.Prod.,52,(1989),561	Pluchea	Asteraceae
Metabolite_2617	266.115	266.115	0.75207	C00016224	Papyracon D	C14H18O5	Lachnum papyraceum A 48-88	Shan,J.Antibiotics 49,(1996),447	Lachnum	Hyaloscyphaceae
Metabolite_2618	266.114	266.113	-4.07793	C00018261	2'-Amino-2'-deoxyadenosine;2'-Aminoadenosine;NSC 324326	C10H14N6O3	Actinomadura sp. No. SA-4427	Matsuyama,J. Antibiotics,32,(1979),1367	Actinomadura	Thermomonosporaceae
Metabolite_3244	308.142	308.141	-3.50178	C00007045	Isocordoin	C20H20O3	Derris floribunda	Harborne, The Handbook of Natural Flavonoids, 2, (1999), 115,Chalcones,dihydrochalcones and aurones;de Lima,Gazz.Chim.Ital.,103,(1973),771;Rao,Curr.Sci.,44,(1975),158	Derris	Fabaceae
Metabolite_3271	312.074	312.072	-3.94374	C00000451	(3E)-Deacetylkumausyne;(+)-Deacetylkumausyne;trans-Deacetylkumausyne	C15H21BrO2	Laurencia nipponica	Suzuki,Chem.Lett,(1983),1643	0	0
Metabolite_3617	336.085	336.085	-1.20821	C00002720	5-O-Caffeoylshikimic acid	C16H16O8	Butia capitata	Harborne,Phytochemical Dictionary Second Edition,Taylor and Francis,(1999),Chapter42	Butia	Palmae
Metabolite_8067	684.193	684.19	-4.32511	C00005677	Chrysosplenol C 6,4'-diglucoside	C30H36O18	Chrysosplenium tetrandrum	Harborne, The Handbook of Natural Flavonoids, 1, (1999), 297.Flavonol O-glycosides;Bohm,Phytochem.,16,(1977),1205	Chrysosplenium	Saxifragaceae
Metabolite_2722	276.062	276.063	5.30519	C00023707	Norjavanicin 2-Acetonyl-7-methoxynaphthazarin	C14H12O6	Fusarium solani	Tatum,Phytochem.,22,(1983),543-547	0	0
Metabolite_9652	1104.54	1104.54	-4.22796	C00003508	Camellidin II	C53H84O24	Camellia japonica	Harborne,Phytochemical Dictionary Second Edition,Taylor and Francis,(1999),Chapter53	Camellia	Theaceae
Metabolite_4957	458.178	458.179	1.93866	C00030286	Foliachinenoside B1;(-)-Foliachinenoside B1	C21H30O11	Salacia chinensis LINN.	Yoshikawa,Chem.Pharm.Bull.,56,(2008),915	Salacia	Celastraceae
Metabolite_4897	452.239	452.241	3.96819	C00012697	Argutin	C24H36O8	Pluchea arguta	Ahmad,Planta Med.,54,(1988),462	Pluchea	Asteraceae
Metabolite_4935	456.181	456.18	-2.56097	C00028350	Holyrine B	C26H24N4O4	Streptomyces sp. N96C-47	Williams,Tetrahedron Lett.,40,(1999),7171	Streptomyces	Streptomycetaceae
Metabolite_4882	450.154	450.153	-3.83536	C00007992	Asebotin	C22H26O10	Kalmia angustifolia	Harborne, The Handbook of Natural Flavonoids, 2, (1999), 115,Chalcones,dihydrochalcones and aurones;Eykman,Rec.Trav.Chim.,2,(1883),99;Williams,Nature,202,(1964),824	Kalmia	Ericaceae
Metabolite_6064	544.263	544.267	7.18274	C00012065	[1R-[1R*,2S*(Z),4S*,6R*,8R*(Z),9S*,10S*(Z),11R*]]-1,6-Dimethyl-9-(1-methylethenyl)-7-oxo-5,12-dioxatricyclo[9.1.0.04,6]dodecane-2,8,10-triyl ester 2-methyl-2-butenoic acid	C30H40O9	Ligularia spp.	Bohlmann,Chem.Ber.,110,(1977),2640	Ligularia	Asteraceae
Metabolite_6042	542.288	542.288	-0.101846	C00030233	Euphornin B	C31H42O8	Euphorbia helioscopia L.	Zhang,Chem.Pharm.Bull.,54,(2006),1037	Euphorbia	Euphorbiaceae
Metabolite_3507	330.042	330.039	-9.14341	C00000465	(3E)-Obtusenyne	C15H20BrClO	Laurencia nipponica	Howard,Tetrahedron,36,(1980),1747;Gopichand,J.Org.Chem,46,(1981),5192;Norte,Tetrahedron,47,(1991),9411	0	0
Metabolite_1547	198.053	198.053	-1.01043	C00002674	Syringic acid;4-Hydroxy-3,5-dimethoxybenzoic acid	C9H10O5	Arabidopsis thaliana	Tan,Phytochem.,65,(2004),691	Arabidopsis	Cruciferae
Metabolite_1555	198.163	198.162	-2.74322	C00000850	Menthyl acetate	C12H22O2	Mentha piperita	Croteau,Plant Physiol,64,(1979),169	Mentha	Labiatae
Metabolite_8192	696.425	696.424	-2.42673	C00041383	Bisglaucumlide A	C41H60O9	Sarcophyton glaucum	Iwagawa,J.Nat.Prod.,69,(2006),1130	Sarcophyton	Orchidaceae
Metabolite_2494	259.156	259.157	3.8794	C00025555	3alpha-Phenylacetoxytropane	C16H21NO2	Atropa belladonna L.	Hartmann,Planta Med.,52,(1986),390	Atropa	Solanaceae
Metabolite_5900	530.362	530.361	-2.98706	C00031235	Rubianol b	C32H50O6	Rubia yunnanensis	Tao,Chem.Pharm.Bull.,51,(2003),654	Rubia	Rubiaceae
Metabolite_1637	204.09	204.09	-1.69487	C00001396	L-Tryptophan	C11H12N2O2	Pleurocybella porrigens	Amakura,Chem.Pharm.Bull.,54,(2006),1213	Pleurocybella	Marasmiaceae
Metabolite_3745	346.218	346.216	-7.1536	C00001708	(-)-Chimonanthine;Chimonanthin	C22H26N4	Calycanthus floridus	Harborne,Phytochemical Dictionary Second Edition,Taylor and Francis,(1999),Chapter20	Calycanthus	Calycanthaceae
Metabolite_2172	236.106	236.105	-3.66171	C00000545	Pyrenochaetic acid C	C13H16O4	Pyrenochaeta terrestris	Sato,Agric.Biol.Chem,45,(1981),795;Sato,Agric.Biol.Chem,45,(1981),1675	Pyrenochaeta	Incertae sedis
Metabolite_5872	526.291	526.289	-3.4061	C00015616	SB 291071	C26H42N2O9	Pseudomonas fluorescens DSM 11579	Thirkettle,J.Antibiotics 53,(2000),664	Pseudomonas	Pseudomonadaceae
Metabolite_1969	223.119	223.121	8.60461	C00016868	(-)-Deacetylanisomycin;Deacetylanisomycin	C12H17NO3	Streptomyces SA3097	Hosoya,J.Antibiotics 46,(1993),1300	Streptomyces	Streptomycetaceae
Metabolite_3706	344.056	344.053	-9.02822	C00002678	3,3',4'-tri-O-methylellagic acid;Nasutin B	C17H12O8	Eugenia spp.	Harborne,Phytochemical Dictionary Second Edition,Taylor and Francis,(1999),Chapter40	Eugenia	Myrtaceae
Metabolite_1636	204.078	204.079	1.57146	C00002983	3-Butylidene-7-hydroxyphthalide	C12H12O3	Ligusticum wallichii	Harborne,Phytochemical Dictionary Second Edition,Taylor and Francis,(1999),Chapter47	Ligusticum	Apiaceae
Metabolite_2472	257.106	257.105	-1.67323	C00015416	TMC 120C	C15H15NO3	Aspergillus ustus TC 1118	Kohno,J.Antibiotics 52,(1999),913	Aspergillus	Trichocomaceae
Metabolite_5979	538.29	538.293	6.1865	C00003425	Euphorbia factor Ti2	C32H42O7	Euphorbia tirucalli	Harborne,Phytochemical Dictionary Second Edition,Taylor and Francis,(1999),Chapter52	Euphorbia	Euphorbiaceae
Metabolite_3504	330.038	330.038	-0.170438	C00029474	3,3'-di-O-Methylellagic acid;3,3'-Dimethoxyellagic acid	C16H10O8	Platycarya strobilacea	Tanaka,Phytochem.,47,(1998),851	Platycarya	Juglandaceae
Metabolite_3413	320.055	320.053	-6.26829	C00000938	Ampelopsin;Dihydromyricetin;(2R,3R)-3,5,7,3',4',5'-Hexahydroxyflavanone	C15H12O8	Brassica carinata Y line	Marles,Phytochem.,62,(2003),663	Brassica	Cruciferae
Metabolite_6707	596.26	596.262	3.22669	C00036522	3,7,12-Triacetyl-8-benzoylingol	C33H40O10	Euphorbia nivulia	Ravikanth,Phytochem.,59,(2002),331	Euphorbia	Euphorbiaceae
Metabolite_6355	574.236	574.232	-8.19786	C00029592	7-O-Nicotinoylscutebarbatine H	C32H34N2O8	Scutellaria barbata D.DON	Dai,Chem.Pharm.Bull.,55,(2007),1218	Scutellaria	Labiatae
Metabolite_8511	762.142	762.143	2.08702	C00008916	Theasinensin B	C37H30O18	Camellia sinensis	Harborne, The Handbook of Natural Flavonoids, 2, (1999), 355,Flavans and proanthocyanidins;Nonaka,Chem.Pharm.Bull.,31,(1983),3906;Hashimoto,Chem.Pharm.Bull.,36,(1988),1676	Camellia	Theaceae
Metabolite_6737	597.347	597.351	6.65154	C00017608	6108B;Antibiotic 6108B	C31H51NO10	Micromonospora fastidiosa sp. nov. BA06108 (FERM P-9897)	Funaishi,J.Antibiotics,43,(1990),938	Micromonospora	Micromonosporaceae
Metabolite_7371	632.431	632.429	-3.32789	C00030782	Momordicoside F1	C37H60O8	Momordica charantia L.	Nakamura,Chem.Pharm.Bull.,54,(2006),1545	Momordica	Cucurbitaceae
Metabolite_6539	592.27	592.269	-1.77835	C00036413	13-epi-Phaeophorbide a;Pheophorbide a'	C35H36N4O5	Saussurea medusa Maxim	Duan,Phytochem.,59,(2002),85	Saussurea	Asteraceae
Metabolite_6509	588.256	588.257	1.59552	C00029963	Cipadesin D	C31H40O11	Cipadessa cinerascens	Yuan,Chem.Pharm.Bull.,55,(2007),902	Cipadessa	Meliaceae
Metabolite_2845	280.242	280.24	-5.68542	C00001212	Chaulmoogric acid	C18H32O2	Hydnocarpus wightiana	Harborne,Phytochemical Dictionary Second Edition,Taylor and Francis,(1999),Chapter6	Hydnocarpus	Flacourtiaceae
Metabolite_5007	460.168	460.165	-5.7744	C00015345	Antibiotic RP 1551-4;5-Chloro-3-(3,5-dimethyl-1,3-heptadienyl)-9,9a-dihydro-9-(3-hydroxy-1-oxobutyl)-6a-methyl-6H-furo[2,3-h]-2-benzopyran-6,8(6aH)-dione	C25H29ClO6	Penicillium sp. SPC-21609	Toki,J.Antibiotics 52,(1999),235	Penicillium	Trichocomaceae
Metabolite_6470	584.186	584.189	5.05477	C00008967	Sachaliside 2	C30H32O12	Salix sachalinensis	Harborne, The Handbook of Natural Flavonoids, 2, (1999), 355,Flavans and proanthocyanidins;Mizuno,Heterocycles,31,(1990),1409	Salix	Salicaceae
Metabolite_7362	632.1	632.101	1.62284	C00006038	Myricetin 3-(2''-galloylgalactoside)	C28H24O17	Myrica esculenta	Harborne, The Handbook of Natural Flavonoids, 1, (1999), 297.Flavonol O-glycosides;Sun,Linchan Huaxue Yu Gongye,11,(1991),251	Myrica	Myricaceae
Metabolite_3100	298.094	298.093	-2.66793	C00011564	Palisol	C15H23BrO	Laurencia cf. palisada	Paul,Tetrahedron Lett.,(1980),2787	0	0
Metabolite_3295	314.067	314.068	3.51015	C00000817	(+)-Bornyl diphosphate;(+)-Bornyl pyrophosphate	C10H20O7P2	Salvia officinalis	Croteau,J. Biol. Chem.,260,(1985),5956	Salvia	Labiatae
Metabolite_6146	554.283	554.288	9.10135	C00002978	Acrovestone	C32H42O8	Acronychia pedunculata	Harborne,Phytochemical Dictionary Second Edition,Taylor and Francis,(1999),Chapter47	Acronychia	Rutaceae
Metabolite_3323	315.18	315.183	9.58211	C00001562	Belladine	C19H25NO3	Nerine filifolia	Nair,Phytochem.,66,(2005),373	Nerine	Amaryllidaceae
Metabolite_4936	456.195	456.194	-1.86224	C00015193	14-Hydroxyperrottetin E 11'-methyl ether	C29H28O5	Pellia endiviifolia	Hashimoto,Phytochem.,30,(1991),1523	Pellia	Pelliaceae
Metabolite_6197	562.223	562.22	-4.51934	C00015906	ES-242-5 atropisomer	C32H34O9	Cordyceps pseudomilitaris BCC 1620	Jaturapat,J.Antibiotics 54,(2001),29	Cordyceps	Clavicipitaceae
Metabolite_6180	558.251	558.246	-8.10773	C00020029	(9S,10R)-9,10,5'-Triacetoxy-11-hydroxyumbelliprenin	C30H38O10	Heptaptera anisoptera	Appendino,Phytochem.,31,(1992),4223	Heptaptera	Apiaceae
Metabolite_6815	604.292	604.288	-6.7208	C00003629	Lanceotoxin B	C32H44O11	Kalanchoe lanceolata	Harborne,Phytochemical Dictionary Second Edition,Taylor and Francis,(1999),Chapter55	Kalanchoe	Crassulaceae
Metabolite_6171	556.241	556.246	8.59324	C00003440	Ingenol 3,20-dibenzoate	C34H36O7	Croton tiglium L.	Chan,J.Am.Chem.Soc.,97,(1975),4437	Croton	Euphorbiaceae
Metabolite_7313	626.315	626.309	-9.62122	C00036824	Bonaspectin A	C35H46O10	Bonamia spectabilis	Tofern,Phytochem.,53,(2000),119	Bonamia	Convolvulaceae
Metabolite_7106	618.416	618.413	-4.93961	C00030783	Momordicoside F2	C36H58O8	Momordica charantia L.	Nakamura,Chem.Pharm.Bull.,54,(2006),1545	Momordica	Cucurbitaceae
Metabolite_7672	652.242	652.237	-8.28371	C00031939	Juncenolide D;(-)-Juncenolide D	C31H40O15	Junceella juncea	Qi,Chem.Pharm.Bull.,52,(2004),1476	0	0
Metabolite_7648	650.276	650.274	-3.18935	C00030971	Petasiphyll A	C37H38N4O7	Petasites formosanus KITAMURA	Lin,Chem.Pharm.Bull.,52,(2004),1151	Petasites	Asteraceae
Metabolite_5473	494.069	494.07	1.68344	C00004470	8-Hydroxytricetin 7-glucuronide	C21H18O14	Scoparia dulcis	Harborne, The Handbook of Natural Flavonoids, 1, (1999), 3.Flavone O-glycosides, John Wiley & Son;Kawasaki,Phyotchem.,27,(1988),3709	Scoparia	Plantaginaceae
Metabolite_7647	650.271	650.273	2.13547	C00037541	Neobonaspectin A;(+)-Neobonaspectin A	C36H42O11	Bonamia spectabilis	Tofern,Phytochem.,53,(2000),119	Bonamia	Convolvulaceae
Metabolite_7680	652.318	652.315	-4.55574	C00001866	Hernandezine	C39H44N2O7	Thalictrum hernandezi	Padilla,Tetrahedron,18,(1962),427	Thalictrum	Ranunculaceae
Metabolite_7686	652.329	652.325	-6.8613	C00003432	Gnididilatin	C37H48O10	Gnidia spp.	Harborne,Phytochemical Dictionary Second Edition,Taylor and Francis,(1999),Chapter52	Gnidia	Thymelaeaceae
Metabolite_4416	414.358	414.361	7.21727	C00002263	Solanocapsine	C27H46N2O	Solanum pseudocapsicum	Harborne,Phytochemical Dictionary Second Edition,Taylor and Francis,(1999),Chapter29	Solanum	Solanaceae
Metabolite_5605	504.171	504.169	-3.34922	C00001135	Gentianose	C18H32O16	Gentiana lutea	Harborne,Phytochemical Dictionary Second Edition,Taylor and Francis,(1999),Chapter2	Gentiana	Gentianaceae
Metabolite_5230	476.167	476.168	3.61966	C00008244	Matteucinol 7-O-glucoside	C24H28O10	Matteuccia spp.	Harborne, The Handbook of Natural Flavonoids, 2, (1999), 350,Flavanones and dihydroflavonols;Hiraoka,Biochem.Syst.Ecol.,6,(1978),171	Matteuccia	Onocleaceae/Dryopteridaceae
Metabolite_7088	616.361	616.361	-0.146487	C00017190	Amphidinolide F	C35H52O9	Amphidinium sp.	Kobayashi,J.Antibiotics 44,(1991),1259	Amphidinium	Gymnodiniaceae
Metabolite_2342	248.07	248.068	-7.45784	C00016872	Misakimycin;P 23924CR	C13H12O5	Streptomyces misakiensis BP-3621	Imai,J.Antibiotics 46,(1993),1323	Streptomyces	Streptomycetaceae
Metabolite_1814	212.105	212.105	-0.304324	C00015406	F 11334A1	C11H16O4	Acremonium murorum (Corda)W.Gams SANK 20793	Tanaka,J.Antibiotics 52,(1999),827	Acremonium	Hypocreaceae
Metabolite_2239	240.102	240.103	4.66854	C00024214	Musclide B	C9H20O5S	Moschus moschiferus L.	Kadota S.,Tetrahedron Lett.,32,(1991),1733-1736;Tezuka Y.,J.Nat.Prod.Lett.,9,(1997),297-304	0	0
Metabolite_5366	486.188	486.188	-0.40409	C00016413	Resormycin	C21H31ClN4O7	Streptomyces platensis MJ953-SF5	Graupner,J.Antibiotics 50,(1997),1020	Streptomyces	Streptomycetaceae
Metabolite_8997	918.268	918.264	-4.47191	C00004277	Luteolin 7-neohesperidoside-4'-sophoroside	C39H50O25	Hedwigia ciliata	Harborne, The Handbook of Natural Flavonoids, 1, (1999), 3.Flavone O-glycosides, John Wiley & Son;Osterdahl,Acta Chem.Scand.,31,(1977),293	Hedwigia	Burseraceae
Metabolite_4868	448.242	448.246	8.43277	C00012073	Ugaferin	C25H36O7	Ferula ugamica	Wada,Tetrahedron Lett.,(1968),4673;Wada,Tetrahedron Lett.,(1968),4677	Ferula	Apiaceae
Metabolite_5280	479.272	479.267	-9.28553	C00002349	Lythramine	C29H37NO5	Lythrum anceps	Harborne,Phytochemical Dictionary Second Edition,Taylor and Francis,(1999),Chapter31	Lythrum	Lythraceae
Metabolite_5364	486.191	486.189	-4.6093	C00003727	Rutaevin	C26H30O9	Calodendrum capense	Cassady,J.Chem.Soc.,Chem.Commun.,(1977),86	0	0
Metabolite_4755	442.162	442.163	1.68323	C00002434	Mallotochromene	C24H26O8	Mallotus japonicus	Harborne,Phytochemical Dictionary Second Edition,Taylor and Francis,(1999),Chapter34	Mallotus	Euphorbiaceae
Metabolite_4760	442.311	442.308	-6.58753	C00017892	Paxisterol;UCY 1003	C28H42O4	Penicillium paxilli KAC 1843	Nakano,J.Antibiotics,41,(1988),409	Penicillium	Trichocomaceae
Metabolite_7300	625.389	625.394	7.04649	C00043482	Enniatin B2	C32H55N3O9	Fusarium sp. F31	Pohanka,J.Nat.Prod.,67,(2004),851	0	0
Metabolite_5150	470.17	470.169	-2.14333	C00024477	11,12-(Methylenedioxy)kopsaporine	C24H26N2O8	Kopsia singapurensis	Awang,Nat.Prod.Lett.,3,(1993),283	Kopsia	Apocynaceae
Metabolite_7020	612.26	612.257	-5.49022	C00033277	Orthosiphol J;(-)-Orthosiphol J	C33H40O11	Orthosiphon stamineus	Tezuka,Chem.Pharm.Bull.,48,(2000),1711	Orthosiphon	Labiatae
Metabolite_7307	626.306	626.306	0.301473	C00032193	Spumigin B1;Spumigin B 1	C31H42N6O8	Nodularia spumigena AV1	Harada,Chem.Pharm.Bull.,52,(2004),889	Nodularia	Nostocaceae
Metabolite_1653	205.074	205.074	0.339765	C00001976	Gentianamine	C11H11NO3	Gentiana kaufmanniana Rgl.et Schamlh.	Rakhmatullaev,Khim.Prir.Soedin.,(1969),32	Gentiana	Gentianaceae
Metabolite_8007	678.266	678.268	1.77402	C00013148	Triptofordin D 2;[3R-(3alpha,4alpha,5alpha,5aalpha,6alpha,9beta,9aalpha,10R*)]-4,10-bis(Acetyloxy)-5a-[(acetyloxy)methyl]-5-(benzoyloxy)octahydro-9-hydroxy-2,2,9-trimethyl-2H-3,9a-methano-1-benzoxepin-6-yl ester 3-phenyl-2-propenoic acid	C37H42O12	Tripterygium wilfordii	Takaishi,Phytochem.,26,(1987),2581	Tripterygium	Celastraceae
Metabolite_4103	382.161	382.163	5.61085	C00012613	Neosolaniol;Neozolaniol;Solaniol;Solaniol; (3alpha,4beta,8alpha)-12,13-Epoxy-trichothec-9-ene-3,4,8,15-tetrol 4,15-diacetate	C19H26O8	Fusarium spp.	Lansden,J.Agric.Food Chem.,26,(1978),246;Ishii,Appl.Environ.Microbiol.,42,(1981),541	0	0
Metabolite_5211	474.188	474.189	1.17887	C00003016	Robustaol A	C25H30O9	Eucalyptus berghei	Harborne,Phytochemical Dictionary Second Edition,Taylor and Francis,(1999),Chapter47	Eucalyptus	Myrtaceae
Metabolite_4211	392.108	392.111	7.41803	C00018705	Cervicarcin;NSC 65380	C19H20O9	Streptomyces ogaensis	Ohkuma,J. Antibiotics Series A,15,(1962),152	Streptomyces	Streptomycetaceae
Metabolite_7896	668.315	668.31	-7.86634	C00029101	Thalictrogamine	C39H44N2O8	Thalictrum polygamum	Shamma,Tetrahedron Lett.,(1973),775;Shamma,Heterocycles,43,(1980),270	Thalictrum	Ranunculaceae
Metabolite_7991	676.295	676.288	-9.25833	C00033272	Orthosiphol A	C38H44O11	Orthosiphon stamineus	Awale,J.Nat.Prod.,66,(2003),255	Orthosiphon	Labiatae
Metabolite_8003	678.259	678.265	8.87254	C00015486	TMC 95A	C33H38N6O10	Apiospora montagnei Sacc. TC 1093	Koguchi,J.Antibiotics 53,(2000),105	Apiospora	Apiosporaceae
Metabolite_7033	612.346	612.346	-0.8683	C00017788	Bagougeramine B	C24H44N12O7	Bacillus circulans TB-2125	Takahashi,J.Antibiotics,39,(1986),1033	Bacillus	Bacillaceae
Metabolite_3937	366.132	366.131	-0.425716	C00000283	Inumakilactone D	C18H22O8	Podocarpus macrophyllus	Kodama,Tetrahedron Lett.,(1977),2909	Podocarpus	Podocarpaceae
Metabolite_7446	636.391	636.387	-5.77563	C00016899	RK 397	C35H56O10	Streptomyces sp. 87-397	Kobinata,J.Antibiotics 46,(1993),1616	Streptomyces	Streptomycetaceae
Metabolite_391	126.104	126.104	2.70824	C00000395	1,5Z-Octadien-3R-ol	C8H14O	Psalliota bispora	Picardi,J.Agric.Biol.Chem,21,(1971),959;Tressl,J.Agric.Biol.Chem,30,(1982),89;Wurzenberger,Biochem.Biophys.Acta,795,(1984),163	0	0
Metabolite_376	126.033	126.032	-9.7554	C00002665	Phloroglucinol	C6H6O3	Alpinia blepharocalyx	Ali,J.Nat.Prod.,64,(2001),289	Alpinia	Zingiberaceae
Metabolite_530	136.053	136.052	-1.42628	C00000750	Phenylacetic acid	C8H8O2	Streptomyces humidus S5-55	Saleem,Nat.Prod.Rep.,27,(2010),238	Streptomyces	Streptomycetaceae
Metabolite_9749	1130.56	1130.55	-8.59746	C00003497	Aescin	C55H86O24	Aesculus hippocastanum	Harborne,Phytochemical Dictionary Second Edition,Taylor and Francis,(1999),Chapter53	Aesculus	Sapindaceae
Metabolite_1217	180.116	180.115	-4.96235	C00000319	Dihydroactinidiolide	C11H16O2	Actinidia polygama	Yoshihara,Chem.Lett.,(1978),433;Murai,Planta Med.,37,(1979),234	Actinidia	Actinidiaceae
Metabolite_746	148.053	148.052	-5.36329	C00000170	trans-Cinnamic acid;trans-Cinnamate	C9H8O2	Populus spp.	Harborne,Phytochemical Dictionary Second Edition,Taylor and Francis,(1999),Chapter42	Populus	Salicaceae
Metabolite_1175	178.101	178.099	-6.98406	C00002741	Methyleugenol;4-Allylveratrole;Eugenol methyl ether	C11H14O2	Magnolia salicifolia	Li,J.Nat.Med.,61,(2007),222	Magnolia	Magnoliaceae
Metabolite_5575	502.186	502.185	-0.575396	C00023562	Tryptoquivaline I	C27H26N4O6	Aspergillus fumigatus	Cole,Handbook of Toxic Fungal Metabolites,Academic Press, (1981),438;Turner,Fungal Metabolites II,Academic Press, (1983),435;Yamazmki,Bull.,26,(1978),111-117	Aspergillus	Trichocomaceae
Metabolite_7841	660.254	660.253	-0.884763	C00026663	N-beta-D-glucopyranosylvincosamide	C32H40N2O13	Psychotria leiocarpa	Henriques,Phytochem.,65,(2004),449	Psychotria	Rubiaceae
Metabolite_3778	350.079	350.079	-0.243853	C00002790	Alteichin	C20H14O6	Alternaria eichhorniae	Harborne,Phytochemical Dictionary Second Edition,Taylor and Francis,(1999),Chapter43	Alternaria	Dothideomycetes
Metabolite_5185	472.221	472.221	-0.576333	C00024448	(-)-11,12-Dimethoxy-N-methoxycarbonyl-kopsinaline	C25H32N2O7	Kopsia officinalis	Feng,Planta Med.,48,(1983),280	Kopsia	Apocynaceae
Metabolite_5576	502.184	502.184	-1.04816	C00014360	Phellodensin F;Flavaprin;5,7,4'-Trihydroxy-8-C-prenylflavanone 7-glucoside	C26H30O10	Phellodendron chinense var.glabriusculum	Wu,Heterocycles,60,(2003),397	Phellodendron	Rutaceae
Metabolite_7917	669.368	669.364	-5.58745	C00016884	Leustroducsin B	C34H56NO10P	Streptomyces platensis SANK 60191	Kohama,J.Antibiotics 46,(1993),1503	Streptomyces	Streptomycetaceae
Metabolite_6236	564.277	564.274	-5.79131	C00047012	Aristophyll B	C34H36N4O4	Aristolochia elegans	Wu,J.Nat.Prod.,63,(2000),692	Aristolochia	Aristolochiaceae
Metabolite_6014	540.297	540.297	-0.201101	C00046782	Isomalyngamide B;(+)-Isomalyngamide B	C28H45ClN2O6	Lyngbya majuscula	Kan,J.Nat.Prod.,63,(2000),1599	0	0
Metabolite_6015	540.298	540.299	2.00673	C00042382	Chaetoglobosin 540	C34H40N2O4	Phomopsis asparagi	Christian,J.Nat.Prod.,68,(2005),1592	Phomopsis	Valsaceae
Metabolite_545	137.048	137.048	-1.05856	C00001401	p-Aminobenzoic acid	C7H7NO2	Arabidopsis thaliana	Basset,PNAS,101,(2004),1496	Arabidopsis	Cruciferae
Metabolite_6832	606.248	606.246	-1.69257	C00039513	Kadangustin D	C34H38O10	Kadsura angustifolia	Gao,J.Nat.Prod.,71,(2008),558	Kadsura	Schisandraceae
Metabolite_3687	342.098	342.1	5.90113	C00026563	Caulersin	C21H14N2O3	Caulerpa serrulata	Su,J.Nat.Prod.,60,(1997),1043	Caulerpa	Caulerpaceae
Metabolite_5670	510.258	510.262	6.5261	C00031955	Kidjolanin	C30H38O7	Marsdenia tomentosa Decne.	Sato,Chem.Pharm.Bull.,25,(1977),876	Marsdenia	Apocynaceae
Metabolite_4541	426.177	426.179	6.01397	C00024544	Kopsaporine	C23H26N2O6	Kopsia teoi	Kam,Tetrahedron Lett.,34,(1993),1819; Kam,Phytochem.,32,(1993),1343	Kopsia	Apocynaceae
Metabolite_7068	614.394	614.397	5.69873	C00023027	(2R,2'R,3S,3'R)-2,2',3,3'-Tetrahydroxy-beta,beta-caroten-4-one	C40H54O5	Rhizobium lupini	Kleinig,Helv. Chim. Acta,60,(1977),254	Rhizobium	Rhizobiaceae
Metabolite_750	148.126	148.125	-4.20616	C00000243	Finavarrene	C11H16	Ascophyllum nodosum	Mueller,Science,218,(1982),1119	Ascophyllum	Fucaceae
Metabolite_1258	182.078	182.079	4.47406	C00001160	Dulcitol	C6H14O6	Euonymus atropurpureus	Harborne,Phytochemical Dictionary Second Edition,Taylor and Francis,(1999),Chapter4	Euonymus	Celastraceae
Metabolite_1055	170.058	170.058	-1.26275	C00024006	Penicillic acid;3-Methoxy-5-methyl-4-oxo-2,5-hexadienoic acid	C8H10O4	Aspergillus sulfureus	Cole,Handbook of Toxic Fungal Metabolites ;Academic Press,New York,(1981),	Aspergillus	Trichocomaceae
Metabolite_2541	262.072	262.074	6.88366	C00026982	Indirubin;Couroupitine B;Indigo red;Indigopurpurin	C16H10N2O2	Baphicacanthus cusia	Deng,Phytomedicine,15,(2008),277	0	0
Metabolite_7433	636.347	636.351	6.5042	C00032832	Cilistol u	C34H52O11	Solanum cilistum	Zhu,Chem.Pharm.Bull.,49,(2001),1440	Solanum	Solanaceae
Metabolite_5132	468.141	468.14	-1.93966	C00028851	Polycarpine;Polycarpine(Polycarpa)	C22H24N6O2S2	Polycarpa aurata	Radchenko,Tetrahedron Lett.,38,(1997),3581	0	0
Metabolite_7736	654.272	654.271	-1.57347	C00033733	Cryptophycin A;(-)-Cryptophycin A	C35H43ClN2O8	Nostoc sp.	Wagner,Phytochem.,69,(2008),323	0	0
Metabolite_7625	648.273	648.278	8.28031	C00034087	Odoralide;(+)-Odoralide	C33H44O13	Cedrala odorata	Kipassa,Phytochem.,69,(2008),1782	0	0
Metabolite_2680	272.082	272.083	3.507	C00018212	(+)-Thienamycin;Thienamycin	C11H16N2O4S	Streptomyces MA4297	Kahan,J. Antibiotics,32,(1979),1	Streptomyces	Streptomycetaceae
Metabolite_4159	387.177	387.179	6.4502	C00016426	31F508a1;Antibiotic 31F508a1;Bioxalomycin alpha1	C20H25N3O5	Streptomyces sp. LL-31F508	Bernan,J.Antibiotics,47,(1994),1417	Streptomyces	Streptomycetaceae
Metabolite_6002	540.268	540.264	-6.3872	C00018507	Antibiotic KA 5685;Saccharocin	C21H40N4O12	Saccharopolyspora hirusta ATCC 27875	Kamiya,J. Antibiotics,36,(1983),738	Saccharopolyspora	Pseudonocardiaceae
Metabolite_4551	426.363	426.361	-4.24392	C00025521	Moenjodaramine	C28H46N2O	Buxus papilosa	Atta-ur-Rahman,Planta Med.,49,(1983),126; Atta-ur-Rahman,Heterocycles,20,(1983),69	Buxus	Buxaceae
Metabolite_5996	540.165	540.163	-3.0765	C00002590	Cleistanthin A	C28H28O11	Cleistanthus collinus	Harborne,Phytochemical Dictionary Second Edition,Taylor and Francis,(1999),Chapter39	Cleistanthus	Phyllanthaceae
Metabolite_3907	362.063	362.064	1.54254	C00004787	5,7,8,3',4'-Pentahydroxy-3,6-dimethoxyflavone	C17H14O9	Gutierrezia microcephala	Harborne, The Handbook of Natural Flavonoids, 1, (1999), 181.Flavonols;Roitman,Phytochem.,24,(1985),835	Gutierrezia	Asteraceae
Metabolite_1193	180.042	180.042	1.30634	C00000615	Caffeic acid	C9H8O4	Begonia nantoensis	Wu,Chem.Pharm.Bull.,52,(2004),345	Begonia	Begoniaceae
Metabolite_6747	598.277	598.278	2.12947	C00038439	Amotsangin B;(+)-Amotsangin B	C33H42O10	Amoora tsangii	Chen,J.Nat.Prod.,71,(2008),93	Amoora	Meliaceae
Metabolite_6752	598.317	598.314	-4.24606	C00034446	Bacobitacin B;(-)-Bacobitacin B	C34H46O9	Bacopa monnieri	Bhandari,Phytochem.,68,(2007),1248	Bacopa	Plantaginaceae
Metabolite_6750	598.308	598.311	6.47521	C00017203	BE 18257A;WS 7338A	C30H42N6O7	Streptomyces misakiensis	Kojiri,J.Antibiotics 44,(1991),1342	Streptomyces	Streptomycetaceae
Metabolite_5582	502.236	502.236	-0.766035	C00000502	Shizukaol A	C31H34O6	Chloranthus japonicus	Kawabata,Phytochem.,29,(1990),2332	Chloranthus	Chloranthaceae
Metabolite_5399	488.165	488.162	-5.42785	C00000955	Dracorubin	C32H24O5	Dracaena draco	Harborne,Phytochemical Dictionary Second Edition,Taylor and Francis,(1999),Chapter36	Dracaena	Dracaenaceae
Metabolite_5703	514.282	514.278	-7.82843	C00032395	Tricalysioside H;(-)-Tricalysioside H	C26H42O10	Tricalysia dubia OHWI	Otuka,Chem.Pharm.Bull.,55,(2007),1600	Tricalysia	Rubiaceae
Metabolite_4434	416.169	416.168	-0.904519	C00029469	2-Phenylethyl O-beta-D-xylopyranosyl-(1->2)-beta-D-glucopyranoside	C19H28O10	Verbena brasiliensis VELL	Ono,Chem.Pharm.Bull.,54,(2006),1421	Verbena	Verbenaceae
Metabolite_9308	978.549	978.543	-6.2375	C00034705	Tasiamide B	C50H74N8O12	Symploca spp.	Williams,J.Nat.Prod.,66,(2003),1006	0	0
Metabolite_7368	632.288	632.289	0.49578	C00001902	Phaeantharine	C39H40N2O6	Phaeanthus ebracteolatus	Harborne,Phytochemical Dictionary Second Edition,Taylor and Francis,(1999),Chapter21	Phaeanthus	Annonaceae
Metabolite_6356	574.246	574.241	-7.85644	C00013166	[3R-(3alpha,5beta,5aalpha,6alpha,7alpha,9alpha,9aalpha,10R*)]-5a-[(Acetyloxy)methyl]octahydro-2,2,9-trimethyl-, 6,7,10-triacetate 5-benzoate 2H-3,9a-methano-1-benzoxepin-5,6,7,10-tetrol	C30H38O11	Euonymus latifolius	Gonzalez,J.Nat.Prod.,53,(1990),474	Euonymus	Celastraceae
Metabolite_6733	597.261	597.259	-3.49875	C00011223	8-Hydroxyergotamine	C33H35N5O6	Claviceps purpurea	Cole,Handbook of Secondary Fungal Metabolites,Volume I,(2003);Berde,Handbook of Experimental Pharmacology,Springer-Verlag New York,(1978)	Claviceps	Clavicipitaceae
Metabolite_1641	204.117	204.115	-9.76799	C00002699	4'-Hydroxy-3'-phenylacetophenone	C13H16O2	Polymnia sonchifolia	Harborne,Phytochemical Dictionary Second Edition,Taylor and Francis,(1999),Chapter41	Polymnia	Asteraceae
Metabolite_7327	627.312	627.309	-4.57288	C00029166	Ulongamide A	C32H45N5O6S	Lyngbya sp. NIH309	Luesch,J.Nat.Prod.,65,(2002),996	0	0
Metabolite_6090	546.36	546.356	-8.72984	C00024081	Heracleifolinol	C32H50O7	Cimicifuga heracleifolia KOMAROV	Li J.Chem.Pharm.Bull.,41,(1993),832-841	Cimicifuga	Ranunculaceae
Metabolite_4456	418.149	418.148	-4.09395	C00033266	Oleoside dimethyl ester;(-)-Oleoside dimethyl ester	C18H26O11	Syringa afghanica	Takenaka,Phytochem.,59,(2002),779	Syringa	Oleaceae
Metabolite_6705	596.159	596.156	-4.30306	C00050218	Sch 54445	C30H29ClN2O9	Actinoplanes sp.	Chu,J.Nat.Prod.,60,(1997),525	Actinoplanes	Actinoplanaceae
Metabolite_2433	252.113	252.115	7.95751	C00000722	cis-Hinokiresinol	C17H16O2	Araucaria angustifolia	Harborne,Phytochemical Dictionary Second Edition,Taylor and Francis,(1999),Chapter39	Araucaria	Araucariaceae
Metabolite_4371	408.087	408.085	-6.63113	C00000728	Prostalidin B	C22H16O8	Justicia prostrata	Ghosal,Chem.Ind,(1979),854	Justicia	Acanthaceae
Metabolite_7056	614.271	614.273	2.58621	C00024098	Swietemahonin C	C33H42O11	Swietenia humilis Zucc.	Jimenez,Phytochem.,49,(1998),1981	Swietenia	Meliaceae
Metabolite_6295	568.289	568.288	-0.283834	C00003635	Sarmentoloside	C29H44O11	Strophanthus divaricatus	Harborne,Phytochemical Dictionary Second Edition,Taylor and Francis,(1999),Chapter55	Strophanthus	Apocynaceae
Metabolite_6298	568.295	568.292	-5.97234	C00046816	Malyngamide Q;(+)-Malyngamide Q	C29H45ClN2O7	Lyngbya majuscula	Milligan,J.Nat.Prod.,63,(2000),965	0	0
Metabolite_6416	582.16	582.158	-1.80923	C00007902	Okanin 4'-alpha-L-arabinofuranosyl-(1->4)-glucoside	C26H30O15	Abies pindrow	Harborne, The Handbook of Natural Flavonoids, 2, (1999), 115,Chalcones,dihydrochalcones and aurones;	Abies	Pinaceae
Metabolite_5464	492.181	492.178	-5.90371	C00015746	Bletilol A;(-)-Bletilol A	C28H28O8	Bletilla striata	Yamaki,Phytochem.,32,(1993),427	Bletilla	Orchidaceae
Metabolite_6882	608.282	608.283	2.88241	C00040920	Clerodendrin B	C31H44O12	Athalia rosae ruficornis	Kawai,Phytochem.,49,(1998),1975	Athalia	Tenthredinidae
Metabolite_6885	608.3	608.299	-2.77914	C00003409	Candletoxin A	C35H44O9	Euphorbia poisonii	Harborne,Phytochemical Dictionary Second Edition,Taylor and Francis,(1999),Chapter52	Euphorbia	Euphorbiaceae
Metabolite_4937	456.187	456.19	6.19855	C00024460	Kopsamine;(-)-Kopsinine F;(-)-N-Methoxycarbonyl-11,12-methylenedioxy-kopsinaline	C24H28N2O7	Kopsia deverrei	Kan-Fan,J.Nat.Prod.,51,(1988),703	Kopsia	Apocynaceae
Metabolite_7577	642.141	642.143	3.09995	C00005634	Quercetagetin 3,7-diglucoside	C27H30O18	Parthenium rollinsianum	Harborne, The Handbook of Natural Flavonoids, 1, (1999), 297.Flavonol O-glycosides;Rodriguez,Biochem.Syst.Ecol.,5,(1977),207	Parthenium	Asteraceae
Metabolite_428	129.079	129.079	2.75068	C00000210	L-Pepecolic acid	C6H11NO2	Lemna gibba	Fujioka,Plant Cell Physiol.,28,(1987),995;Fujioka,Plant Cell Physiol.,33,(1992),419	Lemna	Araceae
Metabolite_7582	642.305	642.304	-1.88577	C00012660	Trichoverritone;[4beta(2Z,4E),15(E)]- 4-[6-[2-(2,5-Dihydro-5-oxo-3-furanyl)ethoxy]-7-hydroxy-2,4-octadienoate] 15-(5-hydroxy-3-methyl-2-pentenoate) 12,13-epoxy-trichothec-9-ene-4,15-diol	C35H46O11	Myrothecium roridum	Jarvis,Tetrahedron Lett.,24,81983),3539	Myrothecium	Incertae sedis
Metabolite_1138	176.049	176.047	-6.69948	C00000553	5-Hydroxy-2-methylchromone	C10H8O3	Daldinia concentrica	Allport,J.chem.Soc,(1960),654	Daldinia	Xylariaceae
Metabolite_3030	292.143	292.142	-3.82145	C00017542	Antibiotic RK 441;Epiderstatin	C15H20N2O4	Streptomyces pulveraceus subsp. epiderstagenes RK-441	Osada,J.Antibiotics,42,(1989),1599	Streptomyces	Streptomycetaceae
Metabolite_3308	314.173	314.173	0.366088	C00010374	3,3,6-Trimethyl-5-heptene-1,2,4-triol	C16H26O6	Calea oxylepis	Bohlmann,Phytochem.,21,(1982),1164	Calea	Asteraceae
Metabolite_2500	260.033	260.032	-3.21329	C00002946	Demethylbellidifolin;1,3,5,8-Tetrahdroxyyxanthone	C13H8O6	Gentiana lactea	Harborne,Phytochemical Dictionary Second Edition,Taylor and Francis,(1999),Chapter46	Gentiana	Gentianaceae
Metabolite_9150	952.076	952.082	6.48279	C00002926	Geraniin	C41H28O27	Coriaria japonica	Harborne,Phytochemical Dictionary Second Edition,Taylor and Francis,(1999),Chapter45	Coriaria	Coriariaceae
Metabolite_5795	520.216	520.216	-1.21548	C00010699	Suspensolide D	C23H36O13	Viburnum suspensum	Endo,Chem.Pharm.Bull.,25,(1977),2140;Iwagawa,Phytochem.,29,(1990),310	Viburnum	Adoxaceae
Metabolite_8492	754.196	754.196	-1.03407	C00004308	Luteolin 7-glucuronide-3',4'-dirhamnoside	C33H38O20	Conocephalum conicum	Harborne, The Handbook of Natural Flavonoids, 1, (1999), 3.Flavone O-glycosides, John Wiley & Son;Markham,Phytochem.,15,(1976),147	Conocephalum	Conocephalaceae
Metabolite_7962	672.299	672.305	8.56378	C00027501	Vateamine 2'beta-N-oxide	C38H44N2O9	Hernandia nymphaefolia	Chen,Planta Med.,55,(2000),133	Hernandia	Hernandiaceae
Metabolite_5432	490.183	490.184	2.80228	C00008264	5-Hydroxy-7,4'-dimethoxy-6,8-di-C-prenylflavanone 5-O-galactoside	C25H30O10	Prosopis juliflora	Harborne, The Handbook of Natural Flavonoids, 2, (1999), 371,Flavanones and dihydroflavonols;Malhotra,Planta Med.,47,(1983),46	Prosopis	Fabaceae
Metabolite_7130	620.294	620.292	-2.80832	C00048606	Aplysiol A;(+)-Aplysiol A	C30H53BrO8	Laurencia mariannensis	Blunt,Nat.Prod.Rep.,27,(2010),165	0	0
Metabolite_5275	478.271	478.272	2.30157	C00008020	3-Geranyl-4,2',4',6'-tetrahydroxy-5-prenyldihydrochalcone	C30H38O5	Boronia inconspicua	Harborne, The Handbook of Natural Flavonoids, 2, (1999), 115,Chalcones,dihydrochalcones and aurones;Ahsan,Phytochem.,36,(1994),799	Boronia	Rutaceae
Metabolite_3901	361.19	361.189	-2.49334	C00002106	Phalaenopsine T	C20H27NO5	Phalaenopsis amabilis	Harborne,Phytochemical Dictionary Second Edition,Taylor and Francis,(1999),Chapter26	Phalaenopsis	Orchidaceae
Metabolite_7123	620.204	620.211	9.80685	C00014009	5,7-Dihydroxy-6,8-di-C-methyl-3-methyoxflavone 7-galactosyl-(1->2)-rhamnoside;7-[(6-Deoxy-2-O-beta-D-galactopyranosyl-alpha-L-mannopyranosyl)oxy]-5-hydroxy-3-methoxy-6,8-dimethyl-2-phenyl-4H-1-benzopyran-4-one	C30H36O14	Cotula anthemoides	Yadava,Fitoterapia,69,(1998),437	Cotula	Asteraceae
Metabolite_5948	533.236	533.241	9.43087	C00024797	1,15-di-O-acetylhypognavine; Hypognavine 1,15-diacetate; Hypognavine diacetate	C31H35NO7	Aconitum sanyoense var.tonense	Tayakama,Chem.Pharm.Bull.,40,(1992),2927	Aconitum	Ranunculaceae
Metabolite_629	142.064	142.063	-3.72625	C00015997	(R)-4-Ethenyltetrahydro-4-hydroxy-2H-pyran-2-one;(-)-Harzialactone B;Harzialactone B	C7H10O3	Trichoderma harzianum OUPS-N115	Amagata,J. Antibiotics,51,(1998),33	Trichoderma	Hypocreaceae
Metabolite_1038	169.075	169.074	-5.50246	C00001424	L-Noradrenaline;Norepinephrine;(-)-Norepinephrine	C8H11NO3	Solanum tuberosum L.	Szopa,Phytochem.,58,(2001),315	Solanum	Solanaceae
Metabolite_2283	244.039	244.037	-7.99133	C00002953	Gentisein	C13H8O5	Gentiana lutea	Harborne,Phytochemical Dictionary Second Edition,Taylor and Francis,(1999),Chapter46	Gentiana	Gentianaceae
Metabolite_4235	394.071	394.069	-4.45639	C00000727	Prostalidin A	C21H14O8	Justicia prostrata	Ghosal,Chem.Ind,(1979),854	Justicia	Acanthaceae
Metabolite_6234	564.272	564.272	0.522276	C00037889	Taxinine NN-7;(+)-Taxinine NN-7	C33H40O8	Taxus cuspidata	Kosugi,Phytochem.,54,(2000),839	Taxus	Taxaceae
Metabolite_6175	556.287	556.288	3.3053	C00030314	Forskoditerpenoside C;(-)-Forskoditerpenoside C	C28H44O11	Coleus forskohlii WILLD.BRIQ.	Shan,Chem.Pharm.Bull.,56,(2008),52	Coleus	Lamiaceae
Metabolite_7404	634.39	634.388	-1.94212	C00025780	Capuvosine	C40H50N4O3	Tabernaemontana capuronii Leeuwenberg	Chardon-Loriaux,Tetrahedron Lett.,(1975),1845; Husson,J.Indian Chem.Soc.,60,(1978),1099	Tabernaemontana	Apocynaceae
Metabolite_5276	478.29	478.293	6.96257	C00033457	Tupichigenin B;(-)-Tupichigenin B	C27H42O7	Tupistra chinensis	Pan,Chem.Pharm.Bull.,48,(2000),1350	Tupistra	Convallariaceae
Metabolite_6229	564.268	564.27	2.14326	C00028883	Pseudotheonamide D	C29H36N6O6	Theonella swinhoei	Nakao,J.Am.Chem.Soc.,121,(1999),2425	0	0
Metabolite_7981	674.36	674.367	9.17753	C00003509	Cimicifugoside	C37H54O11	Cimicifuga simplex	Takemoto,J.Pharm.Soc.,Japan,90,(1970),68	Cimicifuga	Ranunculaceae
Metabolite_1122	175.086	175.084	-7.22872	C00002283	Calystegin B2;Calystegine B2	C7H13NO4	Ipomoea hederifolia	Schimming,Phytochem.,49,(1998),1989	Ipomoea	Convolvulaceae
Metabolite_639	143.094	143.095	2.83112	C00002074	Stachydrine	C7H13NO2	Stachys tubifera	Henry,J.Chem.Soc.,(1950),2866	Stachys	Labiatae
Metabolite_6228	564.261	564.257	-6.13449	C00037257	Hellebortin A	C29H40O11	Helleborus torquatus	Meng,Phytochem.,57,(2001),401	Helleborus	Ranunculaceae
Metabolite_1398	190.062	190.062	0.0797871	C00028304	Girolline;(+)-Girolline	C6H11ClN4O	Pseudaxinyssa cantharella	Newman,J.Nat.Prod.,67,(2004),1216	0	0
Metabolite_9777	1132.53	1132.53	0.216055	C00032142	Sinocrassuloside II;(+)-Sinocrassuloside II	C54H84O25	Sinocrassula asclepiadea FRANCH	Zhao,Chem.Pharm.Bull.,52,(2004),230	Sinocrassula	Crassulaceae
Metabolite_1401	190.098	190.099	6.08178	C00002439	Precocene 1	C12H14O2	Ageratina aromatica	Harborne,Phytochemical Dictionary Second Edition,Taylor and Francis,(1999),Chapter34	Ageratina	Asteraceae
Metabolite_4646	434.104	434.1	-9.80418	C00000673	Sinaiticin	C24H18O8	Phryma leptostachya	Taniguchi,Agric.Biol.Chem,53,(1989),631	Phryma	Phrymaceae
Metabolite_1399	190.065	190.066	8.63643	C00007645	2-Oxo-7-methylthioheptanoic acid;7-Methylthio-2-heptanoic acid	C8H14O3S	Arabidopsis thaliana	Textor,Planta,218,(2004),1026	Arabidopsis	Cruciferae
Metabolite_1889	219.111	219.111	-0.232244	C00001550	Pantothenic acid	C9H17NO5	Escherichia coli	Cronan,JR.,J. Bacteriol.,149,(1982),916	Escherichia	Enterobacteriaceae
Metabolite_700	146.037	146.037	1.06746	C00002460	Coumarin	C9H6O2	Scabiosa comosa	Dargaeva,Khim.Prir.Soedin.,(1976),387	Scabiosa	Dipsacaceae/Diervillaceae/Linnaeaceae/Valerianaceae
Metabolite_348	122.037	122.037	-2.00032	C00000207	Benzoic acid	C7H6O2	Burchardia multiflora	Potesilova,Phytochem.,26,(1987),1031	Burchardia	Colchicaceae
Metabolite_7788	656.336	656.331	-7.05098	C00028238	Eleutherobin	C35H48N2O10	Eleutherobia sp.	Newman,J.Nat.Prod.,67,(2004),1216	0	0
Metabolite_5835	524.203	524.205	2.87879	C00020554	Diversolide F;Malaphyll	C29H32O9	Ferula malacophylla	Bagirov,Khim. Prir. Soedin.,14,(1978),810	Ferula	Apiaceae
Metabolite_930	162.031	162.032	4.13814	C00002503	7-Hydroxycoumarin;Umbelliferon;Umbelliferone	C9H6O3	Vicia sativa	Kovaleva,Khim. Prir. Soedin.,(1986),778	Vicia	Fabaceae
Metabolite_4415	414.348	414.35	3.51675	C00007519	(22S,22R)-22-Hydroxyergost-4-en-3-one	C28H46O2	Arabidopsis thaliana	Fujioka,Annu.Rev.Plant Biol.,54,(2003),137	Arabidopsis	Cruciferae
Metabolite_4822	446.156	446.158	4.16642	C00014326	5-Hydroxy-7,8-dimethoxyflavanone 5-rhamnoside	C23H26O9	Albizzia procera	Yadava,J.Inst.Chem.(India),71,(1999),202	Albizzia	Fabaceae
Metabolite_9588	1076.54	1076.54	-2.21502	C00030139	Dioscoreside E	C52H84O23	Dioscorea futschauensis	Sautour,J.Nat.Prod.,61,(2007),91	Dioscorea	Dioscoreaceae
Metabolite_8352	724.222	724.221	-0.219644	C00004169	Apigenin 7-rhamnoside-4'-rutinoside	C33H40O18	Sesbania rostrata	Harborne, The Handbook of Natural Flavonoids, 1, (1999), 3.Flavone O-glycosides, John Wiley & Son;Messens,Carbohydr.Res.,186,(1989),241	Sesbania	Fabaceae
Metabolite_7786	656.314	656.313	-1.62916	C00040281	Serinocyclin B;(+)-Serinocyclin B	C27H44N8O11	Metarhizium anisopliae	Krasnoff,J.Nat.Prod.,70,(2007),1919	Metarhizium	Clavicipitaceae
Metabolite_7780	656.194	656.195	1.71623	C00002750	Hellicoside	C29H36O17	Plantago asiatica	Harborne,Phytochemical Dictionary Second Edition,Taylor and Francis,(1999),Chapter42	Plantago	Plantaginaceae
Metabolite_7792	656.362	656.367	7.85799	C00033086	Jiufengdine;(+)-Jiufengdine	C36H52N2O9	Delphinium potaninii var.jiufengshanense	Shen,Chem.Pharm.Bull.,50,(2002),1265	Delphinium	Ranunculaceae
Metabolite_6089	546.284	546.283	-1.53878	C00003614	Decoside	C30H42O9	Strophanthus divaricatus	Harborne,Phytochemical Dictionary Second Edition,Taylor and Francis,(1999),Chapter55	Strophanthus	Apocynaceae
Metabolite_6740	598.228	598.226	-3.79058	C00030288	Foliachinenoside C;(-)-Foliachinenoside C	C28H38O14	Salacia chinensis LINN.	Yoshikawa,Chem.Pharm.Bull.,56,(2008),915	Salacia	Celastraceae
Metabolite_6332	570.284	570.283	-2.17543	C00023825	Ganoderic acid F;3,7,11,15,23-pentaoxo-12-acetoxy-5alpha-lanost-8-en-26-oic acid	C32H42O9	Ganoderma lucidum	Kikuchi,Chem.Pharm.Bull.,33,(1985),2624-2627	Ganoderma	Ganodermataceae
Metabolite_8461	746.148	746.148	0.503905	C00002919	Epigallocatechin-(4beta->8)-epicatechin-3-O-gallate	C37H30O17	Camellia sinensis	Harborne,Phytochemical Dictionary Second Edition,Taylor and Francis,(1999),Chapter45	Camellia	Theaceae
Metabolite_5400	488.173	488.17	-6.22534	C00023554	Nortryptoquivalone;Tryptoquivalone;Tryptoquivaline B	C26H24N4O6	Aspergillus clavatus (NRRL5890)	Cole,Handbook of Toxic Fungal Metabolites,Academic Press, (1981),418;Turner,Fungal Metabolites II,Academic Press, (1983),434	Aspergillus	Trichocomaceae
Metabolite_4253	396.25	396.251	2.68853	C00022126	3-[8-[(Acetyloxy)methyl]-13-hydroxy-4-(hydroxymethyl)-12-methyl-11-tridecenyl]-2(5H)-furanone	C22H36O6	Nardophyllum lanatum	Jakupovic,Tetrahedron,42,(1986),1305	Nardophyllum	Asteraceae
Metabolite_3044	293.144	293.142	-7.31623	C00001747	Melosatin B	C19H19NO2	Melochia tomentosa	Harborne,Phytochemical Dictionary Second Edition,Taylor and Francis,(1999),Chapter20	Melochia	Malvaceae
Metabolite_2821	279.15	279.147	-9.90654	C00016865	3097B1	C15H21NO4	Streptomyces SA3097	Hosoya,J.Antibiotics 46,(1993),1300	Streptomyces	Streptomycetaceae
Metabolite_1674	206.132	206.131	-7.97421	C00011500	trans-(+-)-2-Methyl-5-(2-methyl-5-isopropenyltetrahydro-2-furyl)furan	C13H18O2	Nicotiana tabacum	Almqvist,Acta Chem.Scand.Ser.B.,28,(1974),528	Nicotiana	Solanaceae
Metabolite_6254	566.285	566.288	5.72989	C00036003	2-Deacetoxytaxinine J	C33H42O8	Taxus chinensis	Liang,Phytochem.,47,(1998),69	Taxus	Taxaceae
Metabolite_6263	566.29	566.289	-0.38464	C00047011	Aristophyll A;(-)-Aristophyll A	C34H38N4O4	Aristolochia elegans	Wu,J.Nat.Prod.,63,(2000),692	Aristolochia	Aristolochiaceae
Metabolite_6255	566.292	566.291	-0.855342	C00030449	Gypsophilin	C30H46O8S	Gypsophila repens	Elbandy,Chem.Pharm.Bull.,51,(2007),808	Gypsophila	Caryophyllaceae
Metabolite_588	140.049	140.047	-9.13567	C00002649	Gentisyl alcohol	C7H8O3	Aspergillus parasiticus	Son,J.Nat.Prod.,65,(2002),794	Aspergillus	Trichocomaceae
Metabolite_5054	462.337	462.335	-5.40511	C00000192	Dolichosterone	C28H46O5	Oryza sativa	Abe,Agric. Biol. Chem.,48,(1984),1103	Oryza	Poaceae
Metabolite_6760	598.425	598.423	-2.31268	C00023979	Hericenone G;8-Formyl-5-methoxy-2-methyl-2-(4'-methyl-2'-oxo-3'-pentenyl)-7-chromanylmethylstrate	C37H58O6	Hericium erinaceum	Kawagishi,Phytochem.,32,(1993),175-178	Hericium	Hericiaceae
Metabolite_5799	520.249	520.247	-3.23429	C00011254	Okaramine A	C32H32N4O3	Penicillium simplicissimum	Cole,Handbook of Secondary Fungal Metabolites,Volume I,(2003);Murao,Agric.Biol.Chem.,52,(1988),885	Penicillium	Trichocomaceae
Metabolite_8071	684.317	684.315	-3.28292	C00036829	Bonaspectin G	C37H48O12	Bonamia spectabilis	Kraft,Phytochem.,60,(2002),167	Bonamia	Convolvulaceae
Metabolite_5272	478.17	478.169	-3.3095	C00030605	Kelampayoside A	C20H30O13	Nauclea orientalis	Zhang,J.Nat.Prod.,64,(2001),1001	Nauclea	Rubiaceae
Metabolite_2462	256.038	256.037	-4.49224	C00002792	Anthragallol	C14H8O5	Relbunium hypocarpium	Harborne,Phytochemical Dictionary Second Edition,Taylor and Francis,(1999),Chapter43	Relbunium	Rubiaceae
Metabolite_2464	256.095	256.095	-2.09026	C00030084	Dactylose A	C12H16O6	Gymnadenia conopsea R.BR.	Morikawa,Chem.Pharm.Bull.,54,(2006),506	Gymnadenia	Orchidaceae
Metabolite_6767	599.321	599.325	6.94887	C00023570	10-Oxo-11,33-dihydropenitrem B	C37H45NO6	Aspergillus sulphureus NRRL 4077	Laakso,J.Agric.Food Chem.,41,(1993),973-975	Aspergillus	Trichocomaceae
Metabolite_3715	344.171	344.174	8.95978	C00025085	14beta-Hydroxygelsedine	C19H24N2O4	Gelsemium sempervirens	Yeh,J.Nat.Prod.,48,(1985),788	Gelsemium	Gelsemiaceae
Metabolite_2835	280.108	280.11	5.4294	C00002435	2-(4-Methoxyphenethyl)chromone	C18H16O3	Aquilaria spp.	Harborne,Phytochemical Dictionary Second Edition,Taylor and Francis,(1999),Chapter34	Aquilaria	Thymelaeaceae
Metabolite_1797	211.061	211.063	9.49947	C00024694	Carbazole-3-carboxylic acid	C13H9NO2	Clausena lansium	Li,Phytochem.,30,(1991),343	Clausena	Rutaceae
Metabolite_3339	316.176	316.176	-2.7996	C00035329	Isophorene	C14H28N4S2	Mentha pulegium L.	Mahboubi,J.Ethnopharmacol.,119,(2008),325	Mentha	Labiatae
Metabolite_1108	174.079	174.079	-0.060847	C00000108	Indole-3-acetamide;1H-Indole-3-acetamide;IAM	C10H10N2O	Phaseolus mungo	Isogai,Chem. Pharm. Bull.,15,(1967),151;Okamoto,Chem. Pharm. Bull.,15,(1967),163	Phaseolus	Fabaceae
Metabolite_1165	178.028	178.027	-6.26237	C00002422	5,7-Dihydroxychromone;5,7-Dihydroxy-4-chromone	C9H6O4	Begonia nantoensis	Wu,Chem.Pharm.Bull.,52,(2004),345	Begonia	Begoniaceae
Metabolite_6198	562.32	562.314	-9.67516	C00031585	Ajugalide E	C31H46O9	Ajuga taiwanensis	Chan,Chem.Pharm.Bull.,53,(2005),836	Ajuga	Labiatae
Metabolite_6111	550.097	550.096	-1.188	C00004395	6-Hydroxyluteolin 7-(6''-malonylglucoside)	C24H22O15	Bryum capillare	Harborne, The Handbook of Natural Flavonoids, 1, (1999), 3.Flavone O-glycosides, John Wiley & Son;Stein,Z.Naturforsch.C,40,(1985),469	0	0
Metabolite_6986	611.135	611.14	7.62023	C00006801	Cyanidin 3-(6''-caffeylglucoside)	C30H27O14	Silene dioica	Harborne, The Handbook of Natural Flavonoids, 2, (1999), 1,Anthocyanins;Kamsteeg,Z.Naturforsch.,C.,33,(1978),475	Silene	Caryophyllaceae
Metabolite_4372	408.126	408.127	1.59922	C00010475	Unedide	C16H24O12	Arbutus unedo	Jensen,Biochem.Syst.Ecol.,7,(1979),103;Phytochem.,21,(1982),1623;Gardner,J.Nat.Prod.,50,(1987),485	Arbutus	Ericaceae
Metabolite_415	128.12	128.12	-2.40724	C00029423	1-Octen-3-ol	C8H16O	Lentinus edodes Sing.	Kamiya,Tetrahedron,28,(1972),899;Morita,Chem.Pharm.Bull.,15,(1967),998	Lentinus	Polyporaceae
Metabolite_5072	464.113	464.111	-5.58339	C00020608	Hydnocarpin	C25H20O9	Chamaecrista absus	Kostova,Indian J. Chem.,Sect. B 15,(1977),764	Chamaecrista	Fabaceae
Metabolite_4376	408.265	408.266	4.21653	C00023126	10'-Apoviolaxanthal;(3S,5R,6S)-5,6-Epoxy-5,6-dihydro-3-hydroxy-10'-apo-beta,psi-carotenal	C27H36O3	Citrus sinensis	Curl,J. Food Sci.,32,(1967),141	Citrus	Rutaceae
Metabolite_9597	1078.53	1078.52	-5.489	C00030135	Dioscoreside A;(-)-Dioscoreside A	C51H82O24	Dioscorea panthaica	Sautour,J.Nat.Prod.,61,(2007),91	Dioscorea	Dioscoreaceae
Metabolite_3683	341.186	341.184	-5.23456	C00026159	3'-Acetylindicine	C17H27NO6	Messerschmidia argentea	Liddell,Nat.Prod.Rep.,15,(1998),363	Messerschmidia	Boraginaceae
Metabolite_2474	257.139	257.142	8.77069	C00002336	(+)-Elaeocarpine	C16H19NO2	Elaeocarpus ganitrus	Harborne,Phytochemical Dictionary Second Edition,Taylor and Francis,(1999),Chapter31	Elaeocarpus	Elaeocarpaceae
Metabolite_3701	343.096	343.096	-1.5513	C00023965	Arcyriarubin B	C20H13N3O3	Arcyria denudata	Steglich,Angew.Chem.Int.Ed.Engl.,19,(1980),459-460	Arcyria	Arcyriaceae
Metabolite_4298	401.148	401.147	-0.178117	C00024373	Clivacetine	C21H23NO7	Clivia miniata Regel	Kobayashi,Chem.Pharm.Bull.,28,(1980),1827	Clivia	Amaryllidaceae
Metabolite_10067	1228.69	1228.67	-8.90827	C00028069	Clavosine A	C60H101N4O20P	Myriastra clavosa	Fu,J.Org.Chem.,63,(1998),7957	0	0
Metabolite_7101	618.133	618.137	7.30804	C00023995	Alterporriol B;2,2'-Dimethoxy-4,6,4',5',6',7',8'-heptahydroxy-7,7'-dimethyl-(5'S,6'R,7'S,8'R)-5',6',7',8'-tetrahydro-1,1'-bianthraquinone	C32H26O13	Alternaria porri	Suemitsu,Agric.Biol.Chem.,48,(1984),2611-2613	Alternaria	Dothideomycetes
Metabolite_3772	349.204	349.204	-0.127246	C00024701	Euchrestine C	C23H27NO2	Murraya euchrestifolia	Ito,Chem.Pharm.Bull.,39,(1991),1668	Murraya	Rutaceae
Metabolite_7370	632.407	632.408	0.578696	C00023037	19'-Hydroxyfucoxanthinol;(3S,3'S,5R,5'R,6S,6'R)-6',7'-Didehydro-5,6-epoxy-5',6,6',7-tetrahydro-3,3',5',19'-tetrahydroxy-beta,beta-caroten-8(5H)-one	C40H56O6	Emiliania huxleyi	Hertzberg,Acta Chem. Scand.,B,(1988),495	Emiliania	Noelaerhabdaceae
Metabolite_2943	288.088	288.09	6.43582	C00026773	1,2-Dihydroxyrutaecarpine;Reticulatate	C18H12N2O2	Fascaplysinopsis reticulata	Segraves,Tetrahedron Lett.,44,(2003),3471	0	0
Metabolite_6000	540.241	540.236	-9.7935	C00042993	Sesquipinsapol B	C30H36O9	Larix olgensis var. koreana	Yang,J.Nat.Prod.,68,(2005),1175	Larix	Pinaceae
Metabolite_5668	510.249	510.246	-5.34274	C00030907	Pachyclavulide A;(-)-Pachyclavulide A	C26H38O10	Pachyclavularia violacea	Ito,Chem.Pharm.Bull.,55,(2007),1671	0	0
Metabolite_9661	1106.56	1106.57	5.27421	C00034204	Russelioside E;(-)-Russelioside E	C57H86O21	Caralluma tuberculata	Abdel-Sattar,Phytochem.,69,(2008),2180	Caralluma	Apocynaceae
Metabolite_6479	584.297	584.299	3.43909	C00024053	Methyl ganoderate F	C33H44O9	Ganoderma lucidum (FR.)KARST.	Kikuchi,Chem.Pharm.Bull.,33,(1985),2624-2627;Kikuchi,Chem.Pharm.Bull.,34,(1986),3695-3712	Ganoderma	Ganodermataceae
Metabolite_122	102.031	102.032	3.63132	C00007458	Acetoacetic acid	C4H6O3	Pseudomonas putida	Ignacio,Environmental Microbiol,4,(2002),824	Pseudomonas	Pseudomonadaceae
Metabolite_915	160.052	160.052	0.0371847	C00000552	1,8-Dihydroxynaphthalene	C10H8O2	Daldinia concentrica	Allport,J.chem.Soc,(1960),654	Daldinia	Xylariaceae
Metabolite_3224	306.181	306.183	5.83236	C00018116	6-Desmethylmonacolin J;Compactin diol lactone;ML 236A	C18H26O4	Penicillium citrinum SANK 18767	Endo,J. Antibiotics,29,(1976),1346	Penicillium	Trichocomaceae
Metabolite_7403	634.382	634.387	8.24502	C00032039	Myriceric acid B	C39H54O7	Hibiscus taiwanensis	Wu,Chem.Pharm.Bull.,53,(2005),56	Hibiscus	Malvaceae
Metabolite_8172	694.267	694.263	-6.59998	C00013144	Celahin D;Elat 5;[3R-(3alpha,4alpha,5beta,5aalpha,6alpha,7alpha,9alpha,9aalpha,10R*)]-5a-[(Acetyloxy)methyl]octahydro-2,2,9-trimethyl-2H-3,9a-methano-1-benzoxepin-4,5,6,7,10-pentol 6,7,10-triacetate 4,5-dibenzoate	C37H42O13	Euonymus latifolius	Sugiura,Tetrahedron,38,(1982),3465;Begley,J.Chem.Soc.Perkin Trans.,1,(1986),535;Rozsa,J.Chem.Soc.Perkin Trans.,1,(1989),1079;Rozsa,J.Chem.Soc.Perkin Trans.,1,(1989),1089	Euonymus	Celastraceae
Metabolite_8261	708.325	708.326	0.828493	C00035464	14-Demethyl-14-isobutyrylanhweidelphinine	C38H48N2O11	Delphinium pentagynum	Diaz,Phytochem.,65,(2004),2123	Delphinium	Ranunculaceae
Metabolite_5894	530.212	530.215	6.363	C00000713	Gomisin D	C28H34O10	Schizandra sp.	Fujihashi,Antimicrob.Agents Chemother,39,(1995),2000	0	0
Metabolite_5648	506.247	506.252	9.99358	C00032220	Sublanceoside A2;Glaucogenin A 3-O-beta-D-digitoxypyranoside	C27H38O9	Cynanchum sublanceolatum	Warashina,Chem.Pharm.Bull.,54,(2006),1551	Cynanchum	Apocynaceae
Metabolite_3985	372.214	372.215	3.43841	C00032794	Byzantionoside B;(+)-Byzantionoside B	C19H32O7	Piper elongatum VAHL.	Masuoka,Chem.Pharm.Bull.,50,(2002),1413	Piper	Piperaceae
Metabolite_8263	708.331	708.334	5.41398	C00027852	Anchinopeptolide B	C33H44N10O8	Anchinoe tenacior	Casapullo,J.Nat.Prod.,57,(1994),1227	Anchinoe	Hymedesmiidae
Metabolite_2140	234.209	234.21	4.59117	C00002236	Spartein;(-)-Spartein	C15H26N2	Genista radiata	Bernasconi,Pharm. Acta Helv.,40,(1965),246	Genista	Fabaceae
Metabolite_237	110.037	110.037	-1.30967	C00002644	Catechol;Pyrocatechol	C6H6O2	Semecarpus vitiensis	Pramono,Plant Med.Phytother.,19,(1985),159	Semecarpus	Anacardiaceae
Metabolite_10041	1216.58	1216.59	9.25504	C00029754	Assamsaponin E	C59H92O26	Camellia sinensis var.assamica PIERRE	Murakami,Chem.Pharm.Bull.,46,(1999),1759	Camellia	Theaceae
Metabolite_4016	374.063	374.064	2.56239	C00004938	Gossypetin 7-methyl ether 8-acetate	C18H14O9	Atraphaxis pyrifolia	Harborne, The Handbook of Natural Flavonoids, 1, (1999), 181.Flavonols;Chumbalov,Khim.Prir,Soedin,12,(1976),658	Atraphaxis	Polygonaceae
Metabolite_2138	234.173	234.173	1.66454	C00002208	Angustifoline	C14H22N2O	Diplotropis martiusii	Kinghorn,Phytochem.,21,(1982),2269	Diplotropis	Fabaceae
Metabolite_5368	486.196	486.2	8.82847	C00024548	Kopsidine A	C25H30N2O8	Kopsia teoi	Kam,Tetrahedron Lett.,34,(1993),1819	Kopsia	Apocynaceae
Metabolite_3624	336.16	336.157	-8.73118	C00016594	Dihydrotetrodecamycin	C18H24O6	Streptomyces nashvillensis MJ885-mF8	Tsuchida,J.Antibiotics 48,(1995),1104	Streptomyces	Streptomycetaceae
Metabolite_7416	636.093	636.096	4.6226	C00035191	1,4,6-Trigalloylglucose	C27H24O18	Monochaetum normale	Yoshida,Phytochem.,66,(2005),1972	Monochaetum	Melastomataceae
Metabolite_5873	526.293	526.293	-0.322734	C00018505	5-Ketomilbemycin A3;5-Oxo-5-deoxymilbemycin A3;5-Oxomilbemycin A3;Milbemycin J	C31H42O7	Streptomyces hygroscopicus subsp. aureolacrimosus Rf-107	Ono,J. Antibiotics,36,(1983),509	Streptomyces	Streptomycetaceae
Metabolite_8153	692.214	692.209	-7.41762	C00026629	Leptosin O	C33H36N6O7S2	Leptosphaeria sp.	Yamada,Heterocycles,63,(2004),641	Leptosphaeria	Phaeosphaeriaceae
Metabolite_7633	648.397	648.403	9.22358	C00031433	Uncarinic acid A;(+)-Uncarinic acid A	C40H56O7	Hibiscus taiwanensis	Wu,Chem.Pharm.Bull.,53,(2005),56	Hibiscus	Malvaceae
Metabolite_8434	740.288	740.289	0.981457	C00045308	Erythrolide J	C35H48O17	Erythropodium caribaeorum	Banjoo,J.Nat.Prod.,65,(2002),314	0	0
Metabolite_1016	167.06	167.058	-8.8615	C00007509	Pyridoxal	C8H9NO3	Arabidopsis thaliana	Lum,Planta,215,(2002),870	Arabidopsis	Cruciferae
Metabolite_5881	528.256	528.257	2.72324	C00037892	Taxuyunnanine Q	C26H40O11	Taxus yunnanensis	Li,Phytochem.,58,(2001),369	Taxus	Taxaceae
Metabolite_2681	272.085	272.084	-4.38806	C00038276	4'-Dehydroxyirenolone	C19H12O2	Musa acuminota	Otalvaro,J.Nat.Prod.,70,(2007),887	Musa	Musaceae
Metabolite_2682	272.09	272.09	-1.54611	C00002638	Arbutin	C12H16O7	Cotoneaster simonsii	Palme,Phytochem.,42,(1996),903	Cotoneaster	Rosaceae
Metabolite_7628	648.31	648.315	6.40654	C00017691	KS 502;KS 502 (enzyme inhibitor)	C34H48O12	Sporothrix sp. KAC-1985	Nakanishi,J.Antibiotics 42,(1989),1049	Sporothrix	Ophiostomataceae
Metabolite_3168	302.16	302.163	8.66762	C00007724	O-Acetylbaptifolin	C17H22N2O3	Thermopsis chinensis	Ohmiya,The Alkaloids,47,(1995),1,Lupine alkaloids;Saito,J.Nat.Prod.,52,(1989),1032	Thermopsis	Fabaceae
Metabolite_2211	238.102	238.103	4.73325	C00018483	Antibiotic OM 674;Thiotetromycin	C13H18O2S	Streptomyces sp. OM-674	Omura,J. Antibiotics,36,(1983),109	Streptomyces	Streptomycetaceae
Metabolite_8660	786.098	786.092	-8.58809	C00002938	Tellimagrandin I	C34H26O22	Casuarina rigida	Sawada,J.Pharm.Soc.,Japan,78,(1958),1023	Casuarina	Casuarinaceae
Metabolite_473	131.095	131.095	-0.723764	C00001334	beta-Alaninebetaine	C6H13NO2	Limonium vulgare	Harborne,Phytochemical Dictionary Second Edition,Taylor and Francis,(1999),Chapter10	Limonium	Plumbaginaceae
Metabolite_3564	332.244	332.242	-4.1175	C00018250	Antibiotic KA 7038III;Istamycin A0;Sannamycin B	C15H32N4O4	Streptomyces sannanensis sp. nov. KC-7038	Deushi,J. Antibiotics,32,(1979),1061	Streptomyces	Streptomycetaceae
Metabolite_4975	458.206	458.205	-1.79444	C00024532	Epilapidilectinol;(+)-Epilapidilectinol	C24H30N2O7	Kopsia lapidilecta	Awang,J.Nat.Prod.,56,(1993),1134	Kopsia	Apocynaceae
Metabolite_4606	431.157	431.158	2.30364	C00033010	Glycocitrine V	C22H25NO8	Glycosmis citrifolia (WILLD.) LINDL.	Ito,Chem.Pharm.Bull.,48,(2000),65	Glycosmis	Rutaceae
Metabolite_7089	616.411	616.413	2.8412	C00022947	Vaucheriaxanthin;6,7-Didehydro-5',6'-epoxy-5,5',6,6'-tetrahydro-3,3',5,19'-tetrahydroxy-beta,beta-carotene	C40H56O5	Nannochloropsis salina	Egeland,Dr. Ing. thesis Norwegian University of Science and Technology,Trondheim,(1996)	0	0
Metabolite_2756	276.21	276.209	-2.8725	C00000405	Stearidonate	C18H28O2	Acrosiphonia coalita	Bernart,J. Nat. Prod.,56,(1993),245	Acrosiphonia	Flavobacteriaceae
Metabolite_4648	434.115	434.113	-3.89932	C00020529	3-Chloro-8beta-(5-acetoxy-tiglinoyloxy)-dehydroleucodin	C22H23ClO7	Lasiolaena santosii	Bohlmann,Phytochem.,20,(1981),1613	Lasiolaena	Asteraceae
Metabolite_7086	616.258	616.257	-0.302879	C00026723	8,8''-Biskoenigine	C38H36N2O6	Murraya koenigii	Wang,J.Nat.Prod.,66,(2003),416	Murraya	Rutaceae
Metabolite_4633	432.327	432.324	-7.78041	C00003577	Gitogenin	C27H44O4	Trigonella coerulea	Bogacheva,Khim.Prir.Soedin.,(1977),421	Trigonella	Fabaceae
Metabolite_4640	433.283	433.283	-0.46202	C00016398	(-)-Korormicin;Korormicin	C25H39NO5	Pseudoalteromonas sp. F-420	Yoshikawa,J.Antibiotics 50,(1997),949	Pseudoalteromonas	Alteromonadaceae
Metabolite_1275	183.09	183.09	-4.26163	C00029643	Adrenalin	C9H13NO3	Scoparia dulcis L.	Giang,Chem.Pharm.Bull.,54,(2006),546	Scoparia	Plantaginaceae
Metabolite_6602	594.242	594.238	-6.34694	C00000381	Didemethylallosamidin	C23H38N4O14	Streptomyces sp.	Isogai,Agric.Biol.Chem,53,(1989),2825;Nishimoto,J.Antibiotics,44,(1991),716;Zhou,J.Antibiotics,46,(1993),1582	Streptomyces	Streptomycetaceae
Metabolite_2783	278.08	278.08	1.26598	C00026526	Didemnimide A	C15H10N4O2	Didemnum granulatum	Berlinck,J.Nat.Prod.,67,(2004),510	Didemnum	Didemnidae
Metabolite_2278	243.128	243.126	-8.20461	C00002179	Lemobiline	C15H17NO2	Flindersia ifflaiana	Harborne,Phytochemical Dictionary Second Edition,Taylor and Francis,(1999),Chapter27	Flindersia	Rutaceae
Metabolite_2751	276.15	276.147	-8.44125	C00007725	Sophorasine A	C15H20N2O3	Sophora griffithii	Ohmiya,The Alkaloids,47,(1995),1,Lupine alkaloids;Atta-ur-Rahman,Phytochem.,30,(1991),1001	Sophora	Fabaceae
Metabolite_5631	505.195	505.195	0.539734	C00001798	Alangiside	C25H31NO10	Alangium lamarckii	Harborne,Phytochemical Dictionary Second Edition,Taylor and Francis,(1999),Chapter21	Alangium	Cornaceae/Aucubaceae/Garryaceae/Helwingiaceae
Metabolite_6920	609.295	609.295	0.321428	C00001720	Ergocristine	C35H39N5O5	Claviceps purpurea	Harborne,Phytochemical Dictionary Second Edition,Taylor and Francis,(1999),Chapter20	Claviceps	Clavicipitaceae
Metabolite_7558	640.287	640.288	1.46606	C00042980	Scortechinone S;(-)-Scortechinone S	C35H44O11	Garcinia scortechinii	Sukpondma,J.Nat.Prod.,68,(2005),1010	Garcinia	Clusiaceae/Clusiaceae-Guttiferae
Metabolite_5899	530.272	530.273	0.544318	C00032404	Tricalysioside Q;(-)-Tricalysioside Q	C26H42O11	Tricalysia dubia OHWI	Otuka,Chem.Pharm.Bull.,55,(2007),1600	Tricalysia	Rubiaceae
Metabolite_2220	238.124	238.124	-1.86301	C00030101	Decyl sulfate	C10H22O4S	Daphnia pulex	Yasumoto,Chem.Pharm.Bull.,56,(2008),133	Daphnia	Daphniidae
Metabolite_2217	238.121	238.121	-3.84043	C00011924	Agglomerone	C13H18O4	Eucalyptus mackliana	Hellyer,Aust.J.Chem.,17,(1967),1419	Eucalyptus	Myrtaceae
Metabolite_7398	634.369	634.372	5.004	C00032789	Bugbanoside F;(-)-Bugbanoside F;	C35H54O10	Cimicifuga simplex WORMSK.	Kusano,Chem.Pharm.Bull.,49,(2001),437	Cimicifuga	Ranunculaceae
Metabolite_7557	640.293	640.29	-5.65976	C00028103	Crooksiine;O17-Demethylcimiciphytine	C36H40N4O7	Haplophyton crooksii	Mroue,J.Nat.Prod.,59,(1996),890	Haplophyton	Apocynaceae
Metabolite_5918	532.168	532.173	9.22434	C00007161	4-Hydroxyrottlerin	C30H28O9	Rottlera tinctoria	Harborne, The Handbook of Natural Flavonoids, 2, (1999), 115,Chalcones,dihydrochalcones and aurones;Merlini,Chem.Abstr.,72,(1970),21564	Rottlera	Euphorbiaceae
Metabolite_2916	286.131	286.132	1.81353	C00002356	Pilosine	C16H18N2O3	Pilocarpus microphyllus	Harborne,Phytochemical Dictionary Second Edition,Taylor and Francis,(1999),Chapter31	Pilocarpus	Rutaceae
Metabolite_6561	592.429	592.434	7.90083	C00033204	Montanacin E	C35H60O7	Annona montana	Wang,Chem.Pharm.Bull.,48,(2000),1109	Annona	Annonaceae
Metabolite_4604	430.346	430.345	-2.62165	C00023766	Cerevisterol;(-)-Cerevisteri;Ergosta-7,22-diene-5alpha,6beta,7beta-triol;(22E)-Ergosta-7,22-diene-3beta,5alpha,6beta-triol	C28H46O3	Polyporus dryadeus	Andina,Phytochem.,19,(1980),93-97;Ceccerelli,Phytochem.,14,(1975),1434;Cherotchenko,Dokl.Akad.Naukssr.,212,(1973),486-487;Serebryakov,Tetrahedron,26,(1970),5215-5223;Turner,Fungal Metabolites II;Academic Press,New York,NY,316 pp.(1983)	Polyporus	Polyporaceae
Metabolite_7304	626.277	626.273	-7.36319	C00024101	Swietemahonin F	C34H42O11	Swietenia mahagoni JACQ.	Kadota S.,Chem.Pharm.Bull.,38,(1990),894-901	Swietenia	Meliaceae
Metabolite_8559	772.247	772.243	-5.08868	C00014344	Alhagidin;5,7,3'-Trihydroxy-4'-methoxyflavanone 7-galactosyl-(1->2)-[rhamnosyl-(1->6)]glucoside	C34H44O20	Alhagi pseudalhagi	Alhagi pseudolhagi,Phytochem.,51,(1999),587	Alhagi	Fabaceae
Metabolite_4955	458.166	458.168	5.34697	C00028008	Cardiodine	C22H35IO2	Delphinium cardiopetalum DC.	Reina,Phytochem.,41,(1996),1235	Delphinium	Ranunculaceae
Metabolite_4992	459.29	459.289	-3.3663	C00026848	Deoxytubulosine;8'-Deoxytubulosine	C29H37N3O2	Alangium bussyanum	Diallo,Phytochem.,40,(1995),975	Alangium	Cornaceae/Aucubaceae/Garryaceae/Helwingiaceae
Metabolite_3879	360.127	360.13	8.2863	C00012686	Austradiol acetate;[1R-(1a,4beta,4abeta,7alpha,8alpha,8aalpha)]-4-Bromodecahydro-1,4a-dimethyl-7-(1-methylethyl)-1,8-naphthalenediol 8-acetate	C17H29BrO3	Laurencia filiformis	Brennan,J.Org.Chem.,47,(1982),3917	0	0
Metabolite_625	142.025	142.027	9.75263	C00007489	3-Oxoadipate enol-lactone	C6H6O4	Pseudomonas putida	Ignacio,Environmental Microbiol,4,(2002),824	Pseudomonas	Pseudomonadaceae
Metabolite_7417	636.202	636.205	5.025	C00006300	Linoside B	C30H36O15	Linum maritimum	Harborne, The Handbook of Natural Flavonoids, 1, (1999), 549,C-glycosylflavones;Wagner,Z.Naturforsch. B.,27,(1972),809	Linum	Linaceae
Metabolite_5023	460.318	460.319	1.19692	C00043837	Polyporusterone D	C28H44O5	Polyporus umbellatus	Zjawiony,J.Nat.Prod.,67,(2004),300	Polyporus	Polyporaceae
Metabolite_4029	374.247	374.246	-4.31261	C00022600	Corymbi-7,13E-dienolide	C23H34O4	Corymbium villosum	Zdero,Phytochem.,27,(1988),227	Corymbium	Asteraceae
Metabolite_3836	354.279	354.277	-6.81344	C00022153	12,19,20-Trihydroxy-14-methylenegeranylnerol	C21H38O4	Lasiolaena morii	Bohlmann,Phytochem.,21,(1982),161	Lasiolaena	Asteraceae
Metabolite_6415	582.153	582.153	-0.0455137	C00006513	2,3-Dihydrosciadopitysin	C33H26O10	Metasequoia glyptostroboides	Harborne, The Handbook of Natural Flavonoids, 1, (1999), 645,Biflavonyls;Beckmann,Phytochem.,10,(1971),2465	Metasequoia	Taxodiaceae
Metabolite_1537	196.121	196.121	1.80614	C00018004	Amiclenomycin;NSC 246130	C10H16N2O2	Streptomyces lavendulae subsp. amiclenomycini MD580-S1	Okami,J. Antibiotics,27,(1974),656	Streptomyces	Streptomycetaceae
Metabolite_6428	582.282	582.283	1.30416	C00030236	Euphoscopin B	C33H42O9	Euphorbia helioscopia L.	Zhang,Chem.Pharm.Bull.,54,(2006),1037	Euphorbia	Euphorbiaceae
Metabolite_6359	574.499	574.496	-5.24452	C00044145	Dieporeticanin 1	C37H66O4	Annona reticulata	Zafra-Polo,Phytochem.,48,(1998),1087	Annona	Annonaceae
Metabolite_7523	638.372	638.367	-8.94624	C00023650	Monodeacetylfusicoccin;F/IV	C34H54O11	Fusicoccum amygdali	Ballio,Characterizetion of By-products of Fusicoccin in Culture Filtrates of Fusicoccum amygdali Del.;Experientia,26,(1970),349-351	Fusicoccum	Botryosphaeriaceae
Metabolite_9032	934.072	934.071	-1.06259	C00002908	Alnusiin	C41H26O26	Alnus sieboldiana	Harborne,Phytochemical Dictionary Second Edition,Taylor and Francis,(1999),Chapter45	Alnus	Betulaceae
Metabolite_6386	578.254	578.253	-1.21629	C00045005	Phellophyll a	C34H34N4O5	Phellodendron amurense var.wilsonii	Wu,J.Nat.Prod.,66,(2003),1207	Phellodendron	Rutaceae
Metabolite_4896	452.151	452.147	-9.08068	C00000678	Maackoline;Kompasinol A	C25H24O8	Maackia amurensis	Kulesh,phytochem.,40,(1995),1001	Maackia	Fabaceae
Metabolite_4904	453.285	453.288	5.48259	C00016561	FO 2546N;Terpendole F	C28H39NO4	Albophoma yamanashiensis	Tomoda,J.Antibiotics 48,(1995),793	0	0
Metabolite_9041	938.1	938.103	2.67304	C00002920	Eugeniin	C41H30O26	Coriaria japonica	Harborne,Phytochemical Dictionary Second Edition,Taylor and Francis,(1999),Chapter45	Coriaria	Coriariaceae
Metabolite_3467	327.135	327.137	6.84312	C00026553	Chondriamide C	C21H17N3O	Chondria atropurpurea	Davyt,J.Nat.Prod.,61,(1998),1560	0	0
Metabolite_6880	608.261	608.262	1.1902	C00042969	Scortechinone C	C34H40O10	Garcinia scortechinii	Sukpondma,J.Nat.Prod.,68,(2005),1010	Garcinia	Clusiaceae/Clusiaceae-Guttiferae
Metabolite_1551	198.069	198.068	-4.76596	C00000330	Capillarin	C13H10O2	Artemisia dracunculus	Bohlmann,Chem.Ber.,103,(1970),2856	Artemisia	Asteraceae
Metabolite_2083	230.019	230.019	1.87059	C00007473	D-Ribose 5-phosphate	C5H11O8P	Escherichia coli	Hove-Jensen,J. Bacteriol.,175,(1993),5628	Escherichia	Enterobacteriaceae
Metabolite_6420	582.284	582.284	1.02494	C00001994	Aralionine A	C34H38N4O5	Araliorhamnus vaginata	Harborne,Phytochemical Dictionary Second Edition,Taylor and Francis,(1999),Chapter24	Araliorhamnus	Rhamnaceae
Metabolite_7424	636.332	636.336	5.6304	C00041700	Nicandrose D;(+)-Nicandrose D	C30H52O14	Physalis nicandroides var.attenuata	Maldonado,J.Nat.Prod.,69,(2006),1511	Physalis	Solanaceae
Metabolite_2882	284.126	284.126	-0.827719	C00016202	Karalicin	C14H20O6	Pseudomonas fluorescens/putida strain SS-3(CCM 4430)	Lampis,J.Antibiotics 49,(1996),260	Pseudomonas	Pseudomonadaceae
Metabolite_6874	608.155	608.153	-3.50663	C00004354	Luteolin 3'-methyl ether 7-(3''-E-p-coumarylglucoside)	C31H28O13	Phlomis lychnitys	Harborne, The Handbook of Natural Flavonoids, 1, (1999), 3.Flavone O-glycosides, John Wiley & Son;Tomas,Phytochem.,25,(1986),1253	Phlomis	Labiatae
Metabolite_4451	418.109	418.111	5.74637	C00010618	Mollugoside	C17H22O12	Galium mollugo	Iavarone,Phytochem.,22,(1983),175	Galium	Rubiaceae
Metabolite_7325	627.306	627.306	-0.0629192	C00043425	Cycloaspeptide D	C35H41N5O6	Penicillium ribeum	Dalsgaard,J.Nat.Prod.,67,(2004),878	Penicillium	Trichocomaceae
Metabolite_7893	668.287	668.283	-4.85823	C00002687	Agrimol C	C36H44O12	Agrimonia pilosa	Harborne,Phytochemical Dictionary Second Edition,Taylor and Francis,(1999),Chapter41	Agrimonia	Rosaceae
Metabolite_355	122.073	122.073	5.25417	C00002663	2-Phenylethanol;Phenethyl alcohol;Phenylethyl alcohol;Phenylethyl alcohol;beta-Phenethyl alcohol	C8H10O	Rosa rugosa	Harborne,Phytochemical Dictionary Second Edition,Taylor and Francis,(1999),Chapter40	Rosa	Rosaceae
Metabolite_8044	682.391	682.393	3.22947	C00032626	28-O-beta-D-glucopyranosyl-6beta,23-dihydroxytormentic acid	C36H58O12	Combretum quadrangulare	Adnyana,Chem.Pharm.Bull.,48,(2000),1114	Combretum	Combretaceae
Metabolite_4046	376.17	376.167	-6.28522	C00019466	Kanzonol V;5,4'-Dihydroxy-6-prenyl-6'',6''-dimethylpyrano[2'',3'':2',3']-2-arylbenzofuran	C24H24O4	Glycyrrhiza glabra	Fukai,Phytochem.,43,(1996),1119	Glycyrrhiza	Fabaceae
Metabolite_6392	578.401	578.403	2.72219	C00044210	Kaji-ichigoside F1;(+)-Kaji-ichigoside F1	C30H58O10	Rosa multiflora	Yeo,Phytochem.,48,(1998),1399	Rosa	Rosaceae
Metabolite_8037	682.343	682.344	1.66625	C00028875	Pseudostellarin B	C33H46N8O8	Pseudostellaria heterophylla	Morita,J.Nat.Prod.,58,(1995),943	Pseudostellaria	Caryophyllaceae
Metabolite_3948	367.142	367.142	-0.955378	C00024624	(+)-Corynoline;Corynoline	C21H21NO5	Corydalis melanochlora	Fang,Yaoxue Xuebao,16,(1981),708	Corydalis	Fumariaceae
Metabolite_5210	474.175	474.174	-2.31376	C00038819	Coelovirin A;(-)-Coelovirin A	C21H30O12	Gymnadenia conopsea	Zi,J.Nat.Prod.,71,(2008),799	Gymnadenia	Orchidaceae
Metabolite_7964	672.313	672.315	1.86438	C00000509	Heterotropatrione	C36H48O12	Heterotropa talai M	Yamamura,Bull.Chem.Soc.Jpn,49,(1976),1940	Heterotropa	Aristolochiaceae
Metabolite_8038	682.349	682.347	-3.63117	C00001655	Methyllycaconitine	C37H50N2O10	Delphinium elatum	Harborne,Phytochemical Dictionary Second Edition,Taylor and Francis,(1999),Chapter19	Delphinium	Ranunculaceae
Metabolite_6153	554.318	554.32	3.98242	C00015614	SB 253514	C28H46N2O9	Pseudomonas fluorescens DSM 11579	Thirkettle,J.Antibiotics 53,(2000),664	Pseudomonas	Pseudomonadaceae
Metabolite_1931	222.017	222.016	-4.43941	C00049232	Mompain	C10H6O6	Helicobasidium mompa	Medentsev,Phytochem.,47,(1998),935	Helicobasidium	Helicobasidiaceae
Metabolite_1029	168.09	168.09	2.10657	C00007504	Pyridoxamine	C8H12N2O2	Arabidopsis thaliana	Lum,Planta,215,(2002),870	Arabidopsis	Cruciferae
Metabolite_3958	369.176	369.179	8.20382	C00026195	Globiferine	C18H27NO7	Crotalaria globifer	Marais,Onderstepoort journal,20,(1944),61	Crotalaria	Fabaceae
Metabolite_8244	706.424	706.429	8.05357	C00030334	Gagunin A	C39H62O11	Phorbas gukulensis	Lee,Chem.Pharm.Bull.,56,(2008),1198	0	0
Metabolite_312	117.08	117.079	-8.92513	C00001398	L-Valine	C5H11NO2	Arabidopsis thaliana	Nikiforova,Plant Physiol.,138,(2005),304	Arabidopsis	Cruciferae
Metabolite_2017	226.048	226.048	0.50655	C00000733	Chorismic acid	C10H10O6	Arabidopsis thaliana	Lange,Plant Mol.Biol.,51,(2003),925	Arabidopsis	Cruciferae
Metabolite_5902	530.389	530.391	4.3893	C00022803	Tethyanin,3,4-Didehydro-beta,phi-carotene	C40H50	Tethya amanensis	Tanaka,Bull. Jap. Soc. Sci. Fish.,50,(1984),1787	0	0
Metabolite_6819	605.269	605.265	-6.54526	C00025771	Berbacolorflammine	C37H37N2O6	Pycnarrhena longifolia (Decne ex.Miq.) Becc.	Van Beek,J.Org.Chem.,47,(1982),898	Pycnarrhena	Menispermaceae
Metabolite_6065	544.376	544.376	0.30465	C00023840	Ganoderic acid Mi;3alpha-Acetoxy-7alpha-methoxy-5alpha-lanosta-8,24E-dien-26-oic acid	C33H52O6	Ganoderma lucidum	Nishitoba,Agric.Biol.Chem.,51,(1987),1149-1153	Ganoderma	Ganodermataceae
Metabolite_7437	636.361	636.366	8.6351	C00048356	Coccinone D;(-)-Coccinone D	C38H52O8	Moronobea coccinea	Marti,Phytochem.,70,(2009),75	Moronobea	Clusiaceae-Guttiferae
Metabolite_283	114.032	114.032	-2.01251	C00036320	(+)-Tulipalin B	C5H6O3	Artabotrys hexapetalus	Wong,Phytochem.,59,(2002),99	Artabotrys	Annonaceae
Metabolite_5440	490.198	490.199	1.89671	C00007971	Piperaduncin A	C29H30O7	Piper aduncum	Harborne, The Handbook of Natural Flavonoids, 2, (1999), 115,Chalcones,dihydrochalcones and aurones;Orjala,J.Nat.Prod.,57,(1994),18	Piper	Piperaceae
Metabolite_621	141.044	141.043	-8.01496	C00001975	Gentianaine	C6H7NO3	Gentiana turkestanorum	Harborne,Phytochemical Dictionary Second Edition,Taylor and Francis,(1999),Chapter23	Gentiana	Gentianaceae
Metabolite_735	147.054	147.053	-7.24748	C00001358	L-Glutamic acid	C5H9NO4	Trifolium pratense L.	Wong,Chem.Ind.(London),(1961),1963;Harper,J.Chem.Soc.,Chem.Commun.,(1965),310;Kazakov,Khim.Prir.Soedin.,(1976),258	Trifolium	Fabaceae
Metabolite_5203	473.165	473.166	2.26684	C00007251	10-Formyl-THF	C20H23N7O7	Arabidopsis thaliana	Hanson,Annu.Rev.Plant Physiol.Plant.Mol.Biol.,52,(2001),119	Arabidopsis	Cruciferae
Metabolite_2417	251.101	251.102	4.84174	C00001495	Cordycepin	C10H13N5O3	Aspergillus nidulans	Harborne,Phytochemical Dictionary Second Edition,Taylor and Francis,(1999),Chapter14	Aspergillus	Trichocomaceae
Metabolite_6975	610.341	610.335	-9.35733	C00022326	Phlomisoside I	C32H50O11	Phlomis betonicoides	Nishizawa,J. Org. Chem.,52,(1987),4878	Phlomis	Labiatae
Metabolite_5514	496.358	496.355	-6.17205	C00023809	Echinodone	C32H48O4	Echinodontium tsugicola	Kanematsu,Chem.Pharm.Bull.,20,(1972),1993-1999	Echinodontium	Echinodontiaceae
Metabolite_1116	174.147	174.148	6.53282	C00017758	Bellenamine;D-beta-Lysylmethanediamine	C7H18N4O	Streptomyces nashvillensis MD743-GF4	Ikeda,J.Antibiotics,39,(1986),476	Streptomyces	Streptomycetaceae
Metabolite_3752	346.284	346.287	7.96134	C00002655	5-(Heptadec-12-enyl)resorcinol	C23H38O2	Mangifera indica	Harborne,Phytochemical Dictionary Second Edition,Taylor and Francis,(1999),Chapter40	Mangifera	Anacardiaceae
Metabolite_4094	382.071	382.07	-2.56953	C00018251	(-)-Bactobolin;Antibiotic BN 183B;Bactobolin;NSC 325014;Y 12278	C14H20Cl2N2O6	Pseudomonas BMG13-A7	Kondo,J. Antibiotics,32,(1979),1069	Pseudomonas	Pseudomonadaceae
Metabolite_3911	362.147	362.144	-9.55377	C00017762	Clavamycin B	C13H22N4O8	Streptomyces hygroscopicus NRRL 15846	King,J.Antibiotics,39,(1986),510	Streptomyces	Streptomycetaceae
Metabolite_3909	362.142	362.14	-5.24558	C00046268	Pandangolide 3;(-)-Pandangolide 3	C16H26O7S	Callyspongia aerizusa	Jadulco,J.Nat.Prod.,64,(2001),527	0	0
Metabolite_8930	882.205	882.201	-5.20801	C00009099	Catechin-(4alpha->8)-gallocatechin-(4alpha->8)-catechin	C45H38O19	Hordeum vulgare	Harborne, The Handbook of Natural Flavonoids, 2, (1999), 355,Flavans and proanthocyanidins;Brandon,Phytochem.,21,(1982),2953;Delcour,J.Inst.Brew.,92,(1986),244	Hordeum	Poaceae
Metabolite_9620	1088.48	1088.47	-6.1512	C00027131	Bis-cephalezomine A;Biscephalezomine A	C57H72N2O19	Cephalotaxus harringtonia	Yoshinaga,Tetrahedron,60,(2004),7861	Cephalotaxus	Cephalotaxaceae
Metabolite_3747	346.223	346.226	6.40995	C00007706	13alpha-(Angeloyloxy)lupanine	C20H30N2O3	Chamaecyparis absinthioides	Ohmiya,The Alkaloids,47,(1995),1,Lupine alkaloids;Christov,Plant Med.Phytother.,24,(1990),7	Chamaecyparis	Cupressaceae
Metabolite_8931	882.249	882.258	9.99749	C00034263	Smilaside K;(+)-Smilaside K	C43H46O20	Smilax bracteata	Zhang,Phytochem.,69,(2008),1398	Smilax	Smilacaceae
Metabolite_5840	524.264	524.263	-1.02742	C00018534	Safracin A	C28H36N4O6	Pseudomonas fluorescens	Ikeda,J. Antibiotics,36,(1983),1279	Pseudomonas	Pseudomonadaceae
Metabolite_103	100.053	100.052	-9.93528	C00001207	Tiglic acid	C5H8O2	Angelica archangelica	Harborne,Phytochemical Dictionary Second Edition,Taylor and Francis,(1999),Chapter5	Angelica	Apiaceae
Metabolite_2399	250.113	250.112	-3.52086	C00021502	Hypolepin A;Pterosin H	C15H19ClO	Hypolepis punctata	Hayashi,Chem. Lett.,(1972),375	Hypolepis	Dennstaedtiaceae
Metabolite_2872	283.094	283.096	4.83142	C00041425	Cephalinone A;(-)-Cephalinone A	C15H13N3O3	Cephalanceropsis gracilis	Wu,J.Nat.Prod.,69,(2006),1467	0	0
Metabolite_3758	347.066	347.063	-7.3163	C00019347	AMP;Adenosine 5'-phosphate	C10H14N5O7P	Escherichia coli	Furth,J. Biol. Chem.,236,(1961),3317	Escherichia	Enterobacteriaceae
Metabolite_7975	674.271	674.273	2.05946	C00033278	Orthosiphonone A;(-)-Orthosiphonone A	C38H42O11	Orthosiphon aristatus	Ohashi,Chem.Pharm.Bull.,48,(2000),433	Orthosiphon	Labiatae
Metabolite_2918	286.193	286.193	0.896337	C00003644	Androstenedione	C19H26O2	Pinus sylvestris	Harborne,Phytochemical Dictionary Second Edition,Taylor and Francis,(1999),Chapter56	Pinus	Pinaceae
Metabolite_839	155.07	155.069	-6.1069	C00001363	L-Histidine	C6H9N3O2	Trifolium pratense L.	Wong,Chem.Ind.(London),(1961),1963;Harper,J.Chem.Soc.,Chem.Commun.,(1965),310;Kazakov,Khim.Prir.Soedin.,(1976),258	Trifolium	Fabaceae
Metabolite_394	127.063	127.063	1.6133	C00001344	L-Baikiain	C6H9NO2	Baikiaea plurijuga	Harborne,Phytochemical Dictionary Second Edition,Taylor and Francis,(1999),Chapter10	Baikiaea	Fabaceae
Metabolite_4095	382.084	382.086	4.58145	C00001531	Cibarian	C12H18N2O12	Astragalus falcatus	Harborne,Phytochemical Dictionary Second Edition,Taylor and Francis,(1999),Chapter16	Astragalus	Fabaceae
Metabolite_7150	620.411	620.408	-4.72919	C00049084	3beta,23,28-Trihydroxy-12-oleanene 23-caffeate	C39H56O6	Hibiscus syriacus	Yun,J.Nat.Prod.,62,(1999),764	Hibiscus	Malvaceae
Metabolite_6971	610.321	610.325	7.3615	C00015627	UCF 116C	C34H46N2O8	Streptomyces sp.	Hara,J.Antibiotics 53,(2000),720	Streptomyces	Streptomycetaceae
Metabolite_7366	632.25	632.247	-4.32139	C00013142	Ejap 5;[3R-(3alpha,4alpha,5alpha,5aalpha,6alpha,7alpha,9alpha,9aalpha,10R*)]-5a-[(Acetyloxy)methyl]octahydro-2,2,9-trimethyl-, 5,6,7,10-tetraacetate 4-benzoate 2H-3,9a-methano-1-benzoxepin-4,5,6,7,10-pentol	C32H40O13	Euonymus latifolius	Sugiura,Tetrahedron,38,(1982),3465;Begley,J.Chem.Soc.Perkin Trans.,1,(1986),535;Rozsa,J.Chem.Soc.Perkin Trans.,1,(1989),1079;Rozsa,J.Chem.Soc.Perkin Trans.,1,(1989),1089	Euonymus	Celastraceae
Metabolite_7263	624.258	624.254	-6.75317	C00016342	Thiomarinol G	C30H44N2O8S2	Alteromonas rava sp. nov. SANK 73390	Shiozawa,J.Antibiotics 50,(1997),449	Alteromonas	Alteromonadaceae
Metabolite_7104	618.271	618.273	2.52868	C00027134	Cissacapine	C38H38N2O6	Antizoma angustifolia	De Wet,Biochem.Syst.Ecol.,32,(2004),1145	Antizoma	Menispermaceae
Metabolite_3481	328.083	328.085	4.78144	C00028560	Malasseziazole A	C20H12N2O3	Malassezia furfur CBS1878	Mayser,Antonie van Leeuwenhoek,84,(2003),185;Kramer,ChemBioChem.,6,(2005),2290;Irlinger,Helv.Chim.Acta,88,(2005),1472	0	0
Metabolite_118	101.049	101.048	-8.36311	C00001343	L-Azetidine 2-carboxylic acid	C4H7NO2	Beta vulgaris	Harborne,Phytochemical Dictionary Second Edition,Taylor and Francis,(1999),Chapter10	Beta	Chenopodiaceae
Metabolite_5863	526.246	526.241	-8.9531	C00033413	Taxumairol Y;(+)-Taxumairol Y	C26H38O11	Taxus mairei (LEMEE & LEVL.) S.Y.Hu.	Shen,Chem.Pharm.Bull.,50,(2002),1561	Taxus	Taxaceae
Metabolite_8531	768.289	768.293	4.90984	C00018297	Rifamycin Q	C39H48N2O12S	Nocardia mediterranea	Cricchio,J. Antibiotics,33,(1980),842	Nocardia	Nocardiaceae
Metabolite_3003	291.089	291.09	1.44196	C00025773	Bianfugecine;5,9-Dimethoxy-7H-dibenzo[de,h]quinolin-7-one	C18H13NO3	Menispermum dauricum DC.	Hou,Yao Hsueh Hsueh Pao,20,(1985),112; Hou,Yao Hsueh Hsueh Pao,19,(1985),471; Kunutomo,Heterocycles,24,(1986),437	Menispermum	Menispermaceae
Metabolite_2149	236.035	236.035	1.829	C00045680	Batzelline C	C11H9ClN2O2	Zyzzya fuliginosa	Chang,J.Nat.Prod.,65,(2002),776	0	0
Metabolite_5177	472.174	472.173	-0.404628	C00009928	Lupinisoflavone N	C25H28O9	Lupinus albus	Harborne, The Handbook of Natural Flavonoids, 2, (1999), 517,Isoflavonoids and neoflavonoids;Tahara,Tahara,Z.Naturforsch.C.,45,(1990),147	Lupinus	Fabaceae
Metabolite_7909	668.392	668.386	-9.87189	C00039776	Miraziridine A	C30H52N8O9	Theonella aff. mirabilis	Nakao,J.Nat.Prod.,70,(2007),689	0	0
Metabolite_5238	476.189	476.189	-0.098826	C00010586	Kanokoside A	C21H32O12	Valeriana officinalis	Endo,Chem.Pharm.Bull.,25,(1977),2140	Valeriana	Valerianaceae/Linnaeaceae/Dipsacaceae/Diervillaceae
Metabolite_2457	255.125	255.126	3.15627	C00018290	Carbazomycin A	C16H17NO2	Streptomyces strain H 1051-MY 10	Sakano,J. Antibiotics,33,(1980),683	Streptomyces	Streptomycetaceae
Metabolite_3344	316.181	316.179	-6.73955	C00037215	Grandiamide C	C18H24N2O3	Aglaia grandis	Inada,Phytochem.,53,(2000),1091	Aglaia	Meliaceae
Metabolite_5264	477.307	477.306	-1.60382	C00033218	Morusimic acid A;(+)-Morusimic acid A	C24H45O9	Morus alba LINNE	Kusano,Chem.Pharm.Bull.,50,(2002),185	Morus	Moraceae
Metabolite_8543	770.358	770.357	-1.95618	C00027413	Michellamine D	C47H50N2O8	Ancistrocladus korupensis	Hallock,J.Nat.Prod.,60,(1997),677;Hallock,Tetrahedron,53,(1997),8121	Ancistrocladus	Ancistrocladaceae
Metabolite_3468	327.259	327.256	-8.88865	C00024831	Ajabicine	C22H33NO	Delphinium ajacis	Joshi,Tetrahedron Lett.,(1993),1441	Delphinium	Ranunculaceae
Metabolite_3847	356.102	356.103	1.80444	C00020890	Arctodecurrolide	C17H21ClO6	Arctotis arctotoides	Jakupovic,Planta Med.,(1986),365	Arctotis	Asteraceae
Metabolite_6838	606.309	606.304	-7.93535	C00031051	Plantagiolide E;(+)-Plantagiolide E	C32H46O11	Tacca plantaginea (HANCE)	Liu,Chem.Pharm.Bull.,54,(2006),992	Tacca	Taccaceae
Metabolite_5179	472.178	472.175	-7.52612	C00023566	Tryptoquivaline N;Deoxynortryptoquivalone	C26H24N4O5	Aspergillus clavatus	Fujimoto,Chem.Pharm.Bull.,44,(1996),1843-1848	Aspergillus	Trichocomaceae
Metabolite_8308	715.389	715.393	5.22527	C00024017	(+)-Maackinine	C39H57NO11	Veratrum maackii REG.	Zhao,Chem.Pharm.Bull.,37,(1989),2920-2928	Veratrum	Melanthiaceae
Metabolite_4862	448.166	448.165	-0.573849	C00021454	Armillaridin	C24H29ClO6	Armillaria mellea	Yang,Planta Med.,50,(1984),288	Armillaria	Physalacriaceae
Metabolite_4863	448.185	448.189	7.06194	C00002543	Lonchocarpenin	C27H28O6	Derris scandens	Harborne,Phytochemical Dictionary Second Edition,Taylor and Francis,(1999),Chapter38	Derris	Fabaceae
Metabolite_8310	715.397	715.394	-3.80834	C00028262	Exumolide B	C40H53N5O7	Dolabella auricularia	Jenkins,Tetrahedron Lett.,39,(1998),2463	0	0
Metabolite_7440	636.37	636.371	0.974924	C00025923	JSTX 4;Joro spider toxin 4; Jorotoxin 4	C28H48N10O7	Nephila clavata	Toki,Jpn.J.Sanit.Zool.(Eisei Dobutsu),11,(1990),9; Aramaki,Biomed.Res.,8,(1987),241	Nephila	Nephilidae
Metabolite_3842	355.154	355.153	-1.17517	C00016839	Lagunamycin	C19H21N3O4	Streptomyces sp. AA0310	Nihei,J.Antibiotics 46,(1993),900	Streptomyces	Streptomycetaceae
Metabolite_3366	318.028	318.03	6.21837	C00016700	SB 260082;7-Chloro-1-O-methylemodin	C16H11ClO5	Fusarium aquaeductuum WC-5228	Shu,J.Antibiotics 47,(1994),1328	0	0
Metabolite_5262	477.288	477.288	0.38801	C00017264	18-Deoxycytochalasin H;L 696474	C30H39NO4	Hypoxylon fragiforme (ATCC 20995, MF5511)	Dombrowski,J. Antibiotics,45,(1992),671	Hypoxylon	Xylariaceae
Metabolite_6117	551.103	551.104	1.58141	C00006877	Delphinidin 3-(6''-malonylglucoside)	C24H23O15	Hordeum spp.	Fossen,Biochem.Syst.Ecol.,30,(2002),855	Hordeum	Poaceae
Metabolite_4175	388.26	388.261	4.21389	C00022216	(ent-13E,14E)-15,16-Diacetoxy-7,13(16),14-labdatriene	C24H36O4	Schkuhria multiflora	Bohlmann,Phytochem.,19,(1980),881	Schkuhria	Asteraceae
Metabolite_3416	320.094	320.092	-4.813	C00024668	Coptisine;YHL II	C19H14NO4	Corydalis intermedia	Slavik,Collect.Czech.Chem.Commun.,54,(1989),2009	Corydalis	Fumariaceae
Metabolite_5052	462.174	462.174	-0.642883	C00030098	Decaffeoylverbascoside;(-)-Decaffeoylverbascoside;Verbasoside;(-)-Verbasoside	C20H30O12	Lippia alba	Hennebelle,J.Ethnopharmacol.,116,(2008),211	Lippia	Verbenaceae
Metabolite_2206	238.097	238.099	9.89563	C00006917	4'-Methoxychalcone	C16H14O2	Citrus limon	Harborne, The Handbook of Natural Flavonoids, 2, (1999), 115,Chalcones,dihydrochalcones and aurones;Peyron,C.R.Hebd,Seances Acad.Sci.,257,(1963),235	Citrus	Rutaceae
Metabolite_8981	914.147	914.154	7.49242	C00001010	Theasinensin A	C44H34O22	Camellia sinensis	Harborne,Phytochemical Dictionary Second Edition,Taylor and Francis,(1999),Chapter36	Camellia	Theaceae
Metabolite_5972	538.235	538.233	-2.18793	C00038462	Anomanolide D;(+)-Anomanolide D	C28H39ClO8	Tubocapsicum anomalum	Heieh,J.Nat.Prod.,70,(2007),747	Tubocapsicum	Solanaceae
Metabolite_5797	520.257	520.257	-0.166555	C00024288	Ajmalimine;17-O-(3',4'5'-Trimethoxybenzoyl)ajmaline;Ajmaline 17-O-(3',4',5'-trimethoxybenzoate)	C30H36N2O6	Rauvolfia vomitoria	Iwu,Planta Med.Suppl.,(1980),13	Rauvolfia	Apocynaceae
Metabolite_7898	668.328	668.331	4.59686	C00001629	14-Deacetylnudicauline	C36H48N2O10	Delphinium stapeliosum	Shrestha,J.Nat.Prod.,63,(2000),2	Delphinium	Ranunculaceae
Metabolite_6061	544.257	544.252	-8.90544	C00036694	Agnucastoside B;(-)-Agnucastoside B	C26H40O12	Vitex agnus-castus	Kuruuzum-Uz,Phytochem.,63,(2003),959	Vitex	Labiatae
Metabolite_3965	370.093	370.09	-8.17842	C00002474	Fraxin	C16H18O10	Aesculus hippocastanum	Harborne,Phytochemical Dictionary Second Edition,Taylor and Francis,(1999),Chapter35	Aesculus	Sapindaceae
Metabolite_6058	544.241	544.242	1.20758	C00028215	Dolichantoside	C28H36N2O9	Strychnos mellodora	Tits,Planta Med.,62,(1996),73	Strychnos	Longaniaceae
Metabolite_4056	377.255	377.257	4.20156	C00001649	Karakoline	C22H35NO4	Aconitum falconeri	Atta-ur-Rahman,J.Nat.Prod.,63,(2000),1393	Aconitum	Ranunculaceae
Metabolite_3868	358.309	358.308	-2.271	C00016491	AKD 2A	C21H42O4	Streptomyces sp. OCU-42815	Akeda,J. Antibiotics,48,(1995),363	Streptomyces	Streptomycetaceae
Metabolite_2086	230.057	230.058	2.10929	C00002447	Visnagin	C13H10O4	Ammi visnaga	Harborne,Phytochemical Dictionary Second Edition,Taylor and Francis,(1999),Chapter34	Ammi	Apiaceae
Metabolite_7819	658.317	658.314	-3.55526	C00047154	7-Methoxygambogellic acid;(-)-7-Methoxygambogellic acid	C39H46O9	Garcinia hanburyi	Tao,J.Nat.Prod.,72,(2009),117	Garcinia	Clusiaceae/Clusiaceae-Guttiferae
Metabolite_5051	462.177	462.179	5.1128	C00026817	(+)-Plicamine;Plicamine	C26H26N2O6	Galanthus plicatus subsp.byzantinus	Unver,Phytochem.,50,(1999),1255	Galanthus	Amaryllidaceae
Metabolite_8243	706.412	706.409	-3.40126	C00026054	Tabernaelegantine A	C43H54N4O5	Tabernaemontana elegans Stapf.	Van der Heijden,Planta Med.,(1986),144	Tabernaemontana	Apocynaceae
Metabolite_8544	770.362	770.364	3.1202	C00031132	RA VII	C41H50N6O9	Rubia akane	Itokawa,J.Nat.Med.,62,(2008),263	Rubia	Rubiaceae
Metabolite_5889	528.384	528.381	-4.63449	C00023810	3-O-Acetyltumulosic acid	C33H52O5	Poria cocos	Pinhey,Aust.J.Chem.,23,(1970),2141-2146;Pinhey,Aust.J.Chem.,24,(1971),609-619	0	0
Metabolite_2183	236.215	236.214	-5.96084	C00036349	(4S*,5S*,6R*,7R*)-5-Methoxy-1(10)E-lepidozene	C16H28O	Porella subobtusa	Nagashima,Phytochem.,56,(2001),347	Porella	Porellaceae
Metabolite_7946	670.391	670.393	2.69062	C00016298	Antibiotic 250-144C	C35H58O12	Streptomyces sp. SNUS 9011-250	Goo,J.Antibiotics 50,(1997),85	Streptomyces	Streptomycetaceae
Metabolite_4944	457.163	457.164	2.07217	C00017792	Antibiotic K 252d;K252d	C26H23N3O5	Nocardiopsis sp. K-290	Akanishi,J.Antibiotics,39,(1986),1066	0	0
Metabolite_3980	372.106	372.106	-1.28105	C00010669	Randioside	C16H20O10	Randia canthioides	Uesato,Phytochem.,21,(1982),353	Randia	Rubiaceae
Metabolite_4182	390.107	390.106	-2.07118	C00001587	Dopaxanthin	C18H18N2O8	Glottiphyllum longum	Harborne,Phytochemical Dictionary Second Edition,Taylor and Francis,(1999),Chapter18	Glottiphyllum	Aizoaceae
Metabolite_7785	656.311	656.31	-2.22022	C00025858	Disinomenine;(+)-Disinomenine	C38H44N2O8	Sinomenium acutum Rehder & Wilson	Chen,Beijing Yike Daxue Xuebao,23,(1991),235	Sinomenium	Menispermaceae
Metabolite_1480	194.07	194.069	-1.96501	C00018107	Antibiotic XK 90;XK 90	C9H10N2O3	Streptomyces sp. MK-90	Takasawa,J. Antibiotics,29,(1976),1015	Streptomyces	Streptomycetaceae
Metabolite_4495	422.268	422.267	-2.33171	C00022352	Hamachilobene C	C24H38O6	Frullania hamachiloba	Toyota,Phytochem.,27,(1988),1789	Frullania	Jubulaceae
Metabolite_5673	511.188	511.191	6.29634	C00018536	Dapriamicin A	C21H29N5O10	Micromonospora sp. SF-1917	Shomura,J. Antibiotics,36,(1983),1300	Micromonospora	Micromonosporaceae
Metabolite_7314	626.333	626.33	-4.78419	C00022327	Phlomisoside II	C32H50O12	Phlomis betonicoides	Nishizawa,J. Org. Chem.,52,(1987),4878	Phlomis	Labiatae
Metabolite_5371	486.219	486.219	-0.13071	C00018748	Antibiotic LL-AB 664;BD 12;LL-AB 664	C18H30N8O8	Streptomyces luteocolor nov. sp.	Furumai,J. Antibiotics 21,(1968),283	Streptomyces	Streptomycetaceae
Metabolite_786	150.142	150.141	-7.14645	C00000242	Cystophorene	C11H18	Cystophora siliquosa	Mueller,Naturwissenschaften,72,(1985),97	Cystophora	Sargassaceae
Metabolite_4475	420.162	420.163	2.70892	C00010597	Lamioside	C18H28O11	Ferula olgae	Konovalova,Khim.Prir.Soedin.,(1975),590	Ferula	Apiaceae
Metabolite_3627	336.269	336.266	-6.47859	C00023419	Methyl 15-hydroxy-7-labden-17-oate	C21H36O3	Halimium viscosum	Urones,Phytochem.26,(1987),3037	Halimium	Cistaceae
Metabolite_2662	270.235	270.235	0.841523	C00035097	ent-Erogorgiaene;(-)-ent-Erogorgiaene	C20H30	Dictyota dichotoma	Kolesnikova,Phytochem.,67,(2006),2115	0	0
Metabolite_7646	650.262	650.261	-2.30712	C00018393	15-Hydroxyansamitocin P-3	C32H43ClN2O10	Streptomyces castaneus IFO 13670	Nakahama,J. Antibiotics,34,(1981),1581	Streptomyces	Streptomycetaceae
Metabolite_8371	724.428	724.427	-1.69423	C00037973	Unguisin B	C37H56N8O7	Emericella unguis	Malmstrom,Phytochem.,60,(2002),869	0	0
Metabolite_7627	648.299	648.293	-8.13817	C00003431	Gnididin	C37H44O10	Gnidia lamprantha	Harborne,Phytochemical Dictionary Second Edition,Taylor and Francis,(1999),Chapter52	Gnidia	Thymelaeaceae
Metabolite_7073	614.481	614.476	-7.90017	C00040949	Donhexocin;(+)-Donhexocin	C35H66O8	Goniothalamus donnaiensis	Jiang,Phytochem.,49,(1998),769	Goniothalamus	Annonaceae
Metabolite_8641	784.078	784.076	-2.04201	C00002932	Pedunculagin	C34H24O22	Casuarina sticta	Sawada,J.Pharm.Soc.,Japan,78,(1958),1023	Casuarina	Casuarinaceae
Metabolite_4672	436.332	436.334	4.14155	C00033850	Ganoderal A;(+)-Ganoderal A	C30H44O2	Ganoderma pfeifferi	Niedermeyer,J.Nat.Prod.,68,(2005),1728	Ganoderma	Ganodermataceae
Metabolite_4548	426.312	426.313	4.39033	C00038924	Dankasterone B;(+)-Dankasterone B	C28H42O3	Gymnacella dankaliensis	Amagata,J.Nat.Prod.,70,(2007),1731	0	0
Metabolite_5133	468.164	468.163	-1.20003	C00031084	Prim-O-Glucosylcimifugin	C22H28O11	Ostericum koreanum	Park,Chem.Pharm.Bull.,55,(2007),1065	Ostericum	Apiaceae
Metabolite_7621	648.233	648.236	5.10493	C00008086	Chalcomoracin	C39H36O9	Morus alba	Harborne, The Handbook of Natural Flavonoids, 2, (1999), 115,Chalcones,dihydrochalcones and aurones;Takasugi,Chem.Lett.,(1980),1573;Hano,Heterocycles,27,(1988),2315	Morus	Moraceae
Metabolite_4522	424.279	424.282	8.6392	C00015097	GEX 1Q5	C24H40O6	Streptomyces sp. GEX1 (FERM BP-5347)	Sakai,J.Antibiotics 55,(2002),855	Streptomyces	Streptomycetaceae
Metabolite_6666	595.14	595.145	8.13651	C00006757	Pelargonidin 3-(6''-caffeylglucoside)	C30H27O13	Ipomoea nil	Harborne, The Handbook of Natural Flavonoids, 2, (1999), 1,Anthocyanins;Pollock,Am.J.Bot.,54,(1967),695;Saito,Phytochem.,35,(1994),407	Ipomoea	Convolvulaceae
Metabolite_7614	646.113	646.117	6.30824	C00032609	1-O-(E)-Caffeoyl-3,4-di-O-galloyl-beta-D-glucopyranose	C29H26O17	Balanophora japonica	Jiang,Chem.Pharm.Bull.,49,(2001),887	Balanophora	Balanophoraceae
Metabolite_5657	508.212	508.211	-2.29853	C00026568	Kirondrine	C30H28N4O4	Perriera madagascariensis	Krebs,J.Nat.Prod.,60,(1997),1183	Perriera	Simaroubaceae
Metabolite_4473	420.127	420.127	-1.30274	C00010685	Sesamoside	C17H24O12	Sesamum angolense	Potterat, Phytochem.,27,(1988),2677	Sesamum	Pedaliaceae
Metabolite_9566	1064.29	1064.3	6.64571	C00005926	Kaempferol 3-neohesperidoside-7-(2''-p-coumaryllaminaribioside)	C48H56O27	Allium ursinum	Harborne, The Handbook of Natural Flavonoids, 1, (1999), 297.Flavonol O-glycosides;Carotenuto,Phytochem.,41,(1996),531	Allium	Alliaceae
Metabolite_3263	310.286	310.287	3.08394	C00000343	omega-Cycloheptyltridecanoic acid	C20H38O2	Alicyclobacillus acidocaldarius	Moore,J. Nat. Prod.,58,(1995),590	Alicyclobacillus	Alicyclobacillaceae
Metabolite_2629	267.097	267.097	-0.635004	C00007444	Adenosine	C10H13N5O4	Allium tuberosum Rottl.ex Spreng.	Zou,Phytochem.,57,(2001),1219	Allium	Alliaceae
Metabolite_6376	577.404	577.398	-9.82066	C00028153	Delavine 3-O-beta-D-glucopyranoside;Hupeheninoside	C33H55NO7	Fritillaria persica	Ori,Phytochem.,31,(1992),3605	Fritillaria	Liliaceae
Metabolite_3262	310.141	310.142	2.62747	C00031630	Bidenoside C;8Z-Decaene-4,6-diyn-1-O-beta-D-glucopyranoside	C16H22O6	Bidens bipinnata LINNE	Li,Chem.Pharm.Bull.,52,(2004),439	Bidens	Asteraceae
Metabolite_5700	514.255	514.257	3.58701	C00012619	Roridine E;[2'E,7'R(R)]-2',3'-Didehydro-7'-deoxo-2'-deoxy-7'-(1-hydroxyethyl)-verrucarin A	C29H38O8	Myrothecium roridum	Bohner, Helv.Chim.Acta,48,(1965),1079	Myrothecium	Incertae sedis
Metabolite_7326	627.314	627.317	4.47902	C00017685	Phoslactomycin D	C31H50NO10P	Streptomyces nigrescens SC-273	Fushimi,J.Antibiotics,42,(1989),1019	Streptomyces	Streptomycetaceae
Metabolite_7329	627.406	627.4	-9.78497	C00027466	Paliurine F;(-)-Paliurine F	C34H53N5O6	Paliurus ramossisimus	Lin,J.Nat.Prod.,63,(2000),1388	Paliurus	Rhamnaceae
Metabolite_1590	201.116	201.115	-3.77614	C00025426	Leptomerine	C13H15NO	Haplophyllum leptomerum	Akhmedzhenova,Khim.Prir.Soedin.,(1986),84	Haplophyllum	Rutaceae
Metabolite_2616	266.078	266.079	5.31659	C00030132	Dihydrocitrinone	C13H14O6	Penicillium citrinum	Wakana,J.Nat.Med.,60,(2006),279	Penicillium	Trichocomaceae
Metabolite_6720	596.302	596.304	3.66037	C00045850	Dictamnoside M;(-)-Dictamnoside M	C27H48O14	Dictamnus dasycarpus	Chang,J.Nat.Prod.,64,(2001),935	Dictamnus	Rutaceae
Metabolite_1552	198.14	198.141	4.17393	C00003138	Guaiazulene	C15H18	Guaiacum officinale	Harborne,Phytochemical Dictionary Second Edition,Taylor and Francis,(1999),Chapter50	Guaiacum	Zygophyllaceae
Metabolite_5115	466.257	466.257	-1.62005	C00016640	Mniopetal B	C25H38O8	Mniopetalum sp. 87256	Kuschel,J.Antibiotics 47,(1994),733	Mniopetalum	Tricholomataceae
Metabolite_8141	690.413	690.416	3.50529	C00001760	Quadrigemine A	C44H50N8	Hodgkinsonia frutescens	Harborne,Phytochemical Dictionary Second Edition,Taylor and Francis,(1999),Chapter20	Hodgkinsonia	Rubiaceae
Metabolite_6399	580.219	580.216	-5.39853	C00002632	Acanthoside B;Eleutheroside E1;(+)-Syringaresinol 4'-O-beta-glucopyranoside;(+)-Syringaresinol O-beta-D-glucoside;(+)-Syringaresinol-4-O-beta-D-glucopyranoside	C28H36O13	Baccharis dracunculifolia DC.	Nagatani,Chem.Pharm.Bull.,50,(2002),583	Baccharis	Asteraceae
Metabolite_5116	466.281	466.283	4.14805	C00001835	Cephaeline	C28H38N2O4	Cephalis ipecacuanha	Battersby,J.Chem.Soc.,(1959),3512	0	0
Metabolite_5119	466.328	466.329	2.82129	C00007529	28-Norbrassinolide	C27H46O6	Arabidopsis thaliana	Fujioka,Annu.Rev.Plant Biol.,54,(2003),137	Arabidopsis	Cruciferae
Metabolite_2659	270.067	270.064	-9.50414	C00014944	Chandrananimycin A	C14H10N2O4	Actinomadura sp. M048	Maskey,J.Antibiotics 56,(2003),622	Actinomadura	Thermomonosporaceae
Metabolite_3124	300.029	300.027	-5.06933	C00002856	Pseudopurpurin	C15H8O7	Galium spp.	Harborne,Phytochemical Dictionary Second Edition,Taylor and Francis,(1999),Chapter43	Galium	Rubiaceae
Metabolite_6390	578.304	578.309	8.42826	C00023413	3alpha-Angeloyloxy-18beta-glucopyranosyloxy-ent-labd-8(17),13-dien-15,16-olide	C31H46O10	Gutierrezia solbrigii	Jakupovic,Tetrahedron,41,(1985),4537	Gutierrezia	Asteraceae
Metabolite_2711	275.1	275.101	0.284832	C00001440	Cardiospermin	C11H17NO7	Cardiospermum grandiflorum	Harborne,Phytochemical Dictionary Second Edition,Taylor and Francis,(1999),Chapter12	Cardiospermum	Sapindaceae
Metabolite_6610	594.318	594.323	7.76641	C00015446	A 108835;Desulfointegracide B;Integracide A;L 155911;L 681512-1	C32H50O8S	Fusarium compactum	Brill,J. Antibiotics,49,(1996),541	0	0
Metabolite_5626	504.228	504.228	-0.50954	C00040578	Tubocapsenolide G	C28H37ClO6	Tubocapsicum anomalum	Heieh,J.Nat.Prod.,70,(2007),747	Tubocapsicum	Solanaceae
Metabolite_6540	592.29	592.288	-1.9607	C00030568	Junceol F	C31H44O11	Junceella juncea	Sung,Chem.Pharm.Bull.,56,(2008),1276	0	0
Metabolite_4628	432.163	432.163	-0.605812	C00030899	Osmanthuside H;(-)-Osmanthuside H	C19H28O11	Tabebuia impetiginosa	Warashina,Chem.Pharm.Bull.,54,(2006),14	Tabebuia	Bignoniaceae
Metabolite_469	131.074	131.073	-4.76262	C00001430	Skatole	C9H9N	Arum spp.	Harborne,Phytochemical Dictionary Second Edition,Taylor and Francis,(1999),Chapter11	Arum	Araceae
Metabolite_2774	277.203	277.204	3.44715	C00026717	Neostenine;(+)-Neostenine; Isostenine	C17H27NO2	Stemona tuberosa	Chung,Planta Med.,69,(2003),914	Stemona	Stemonaceae
Metabolite_7566	640.389	640.384	-7.84452	C00034527	Guineamide C;(-)-Guineamide C	C35H52N4O7	Lyngbya majuscula	Tan,Phytochem.,68,(2007),954	0	0
Metabolite_3546	331.192	331.194	3.59572	C00001745	Mahanimbine	C23H25NO	Murraya exotica	Harborne,Phytochemical Dictionary Second Edition,Taylor and Francis,(1999),Chapter20	Murraya	Rutaceae
Metabolite_5330	484.083	484.085	4.30049	C00011155	Nilocitin;2,3-di-O-Galloylglucose	C20H20O14	Eugenia jambolana	Mahmoud,Phytochem.,58,(2001),1239	Eugenia	Myrtaceae
Metabolite_8189	696.284	696.278	-8.37604	C00017826	Urdamycin B	C37H44O13	Streptomyces fradiae T-2717	Drautz,J.Antibiotics,39,(1986),1657	Streptomyces	Streptomycetaceae
Metabolite_5623	504.221	504.221	-1.48136	C00010554	Furcatoside C	C23H36O12	Viburnum furcatum	Hase,Phytochem.,24,(1985),1323	Viburnum	Adoxaceae
Metabolite_8188	696.275	696.272	-3.16729	C00014642	2',4'-Dihydroxy-6'-methoxy-3'-(2-hydroxybenzyl)-5'-(3 x 2-hydroxybenzyl)dihydrochalcone	C44H40O8	Xylopia africana	Anam,Indian J.Chem.,36B,(1997),57	Xylopia	Annonaceae
Metabolite_3590	334.25	334.251	2.00868	C00022380	8alpha,13R-Epoxy-14-labden-19-oic acid	C21H34O3	Pinus sylvestris	Bardyshev,Khim. Prir. Soedin.,18,(1982),480	Pinus	Pinaceae
Metabolite_7606	644.242	644.247	7.09017	C00038660	Buddlenol D	C33H40O13	Tarenna attenuata	Yang,J.Nat.Prod.,70,(2007),521	Tarenna	Rubiaceae
Metabolite_6495	586.348	586.351	3.99936	C00018403	Tetronomycin	C34H50O8	Streptomyces sp. nov. (S 53151/A)	Keller-Juslen,J. Antibiotics,35,(1982),142	Streptomyces	Streptomycetaceae
Metabolite_6497	586.501	586.496	-9.0588	C00018980	Erythrinasinate	C38H66O4	Erythrina sacleuxii	Yenesew,Phytochem.,50,(2000),457	Erythrina	Fabaceae
Metabolite_5362	486.175	486.174	-2.66803	C00040272	Seguinoside G;(-)-Seguinoside G	C22H30O12	Myrsine seguinii	Zhong,Phytochem.,52,(1999),923	Myrsine	Myrsinaceae
Metabolite_3223	306.172	306.173	5.51907	C00024543	Kopsan-22-one;Kopsanone;22-Oxokopsan	C20H22N2O	Kopsia hainanensis	Zhu,Planta Med.,63,(1986)	Kopsia	Apocynaceae
Metabolite_1403	190.108	190.107	-9.11702	C00001368	gamma-Hydroxy-L-arginine	C6H14N4O3	Vicia spp.	Harborne,Phytochemical Dictionary Second Edition,Taylor and Francis,(1999),Chapter10	Vicia	Fabaceae
Metabolite_6492	586.283	586.287	6.61572	C00048577	15,16-Anhydrothyrsiferol;(+)-15,16-Anhydrothyrsiferol	C30H51BrO6	Laurencia omaezakiana	Blunt,Nat.Prod.Rep.,27,(2010),165	0	0
Metabolite_1413	191.059	191.058	-1.99095	C00000104	5-Hydroxyindole-3-acetic acid	C10H9NO3	Cryptocarya pyriformis	Weekley,Biodeterior.Res.1.ed.by Llewellyn GC. O'rear CE. Plenum New York,(1986),236-249	Cryptocarya	Lauraceae
Metabolite_5137	468.198	468.2	3.89512	C00003346	Paucin	C23H32O10	Baileya pauciradiata	Cox,J. Chem. Soc. Perkin Trans. II,(1977),259	Baileya	Asteraceae
Metabolite_775	150.031	150.032	5.13565	C00002666	Piperonal	C8H6O3	Piper philippinum	Chen,Phytochem.,68,(2007),2101	Piper	Piperaceae
Metabolite_3219	306.101	306.1	-0.592028	C00026056	Teladiazoline	C18H14N2O3	Telitoxicum glaziovii Moldenke	Menachery,J.Nat.Prod.,51,(1988),1283	Telitoxicum	Menispermaceae
Metabolite_6528	590.496	590.491	-8.4647	C00038665	Bullatencin;(+)-Bullatencin	C37H66O5	Annona bullata	Zafra-Polo,Phytochem.,48,(1998),1087	Annona	Annonaceae
Metabolite_6643	594.326	594.325	-1.50583	C00024720	Murrafoline;Murrafoline A	C41H42N2O2	Murraya euchrestifolia	McPhail,Tetrahedron Lett.,(1983),5377	Murraya	Rutaceae
Metabolite_7554	640.231	640.229	-4.01273	C00039223	Frajunolide G;(+)-Frajunolide G	C31H41ClO12	Junceella fragilis	Liaw,J.Nat.Prod.,71,(2008),1551	0	0
Metabolite_1596	202.076	202.074	-9.38254	C00002202	Vasicinone	C11H10N2O2	Biebersteinia multifida	Harborne,Phytochemical Dictionary Second Edition,Taylor and Francis,(1999),Chapter27	Biebersteinia	Biebersteiniaceae
Metabolite_5961	535.104	535.103	-1.73639	C00016098	BE 19412A	C28H22ClNO8	Streptomyces sp. A19412	Tsukamoto,J.Antibiotics 51,(1998),908	Streptomyces	Streptomycetaceae
Metabolite_6290	568.265	568.267	3.35991	C00024103	Swietemahonolide	C32H40O9	Xylocarpus granatum	Li,J.Nat.Prod.,72,(2009),2110	Xylocarpus	Meliaceae
Metabolite_3057	294.097	294.095	-5.24107	C00001328	Tuliposide B	C11H18O9	Tulipa hybrida	Harborne,Phytochemical Dictionary Second Edition,Taylor and Francis,(1999),Chapter9	Tulipa	Liliaceae
Metabolite_1830	214.064	214.063	-2.47293	C00001289	Mycosinol	C13H10O3	Botryotinia fuckeliana	Harborne,Phytochemical Dictionary Second Edition,Taylor and Francis,(1999),Chapter8	Botryotinia	Sclerotiniaceae
Metabolite_73	96.0207	96.0211	4.2264	C00000301	Protoanemonin;Protoanemonene	C5H4O2	Clematis flammula	Font,Anales Real Soc. Espan. Fis. Quim. Ser. B,62,(1966),705	Clematis	Ranunculaceae
Metabolite_1812	212.086	212.084	-9.40157	C00002897	Pinosylvin;3,5-Dihydroxystilbene;Pinosylvine	C14H12O2	Alnus crispa	Clausen,J.Chem.Ecol.,12,(1986),2117	Alnus	Betulaceae
Metabolite_4362	407.192	407.194	5.5962	C00026211	Ligularidine;O-Acetylcrotaverrine	C21H29NO7	Pittocaulon hintonii	Marin-Loaiza,Phytochem.,69,(2008),154	Pittocaulon	Asteraceae
Metabolite_6289	568.231	568.231	-0.486029	C00030637	Lappaol D	C31H36O10	Arctium lappa	Park,Chem.Pharm.Bull.,55,(2007),150	Arctium	Asteraceae
Metabolite_7492	638.27	638.273	4.36904	C00048015	Moluccensin G	C35H42O11	Xylocarpus moluccensis	Li,J.Nat.Prod.,72,(2009),1657	Xylocarpus	Meliaceae
Metabolite_7025	612.298	612.293	-8.12669	C00038438	Amotsangin A;(+)-Amotsangin A	C34H44O10	Amoora tsangii	Chen,J.Nat.Prod.,71,(2008),93	Amoora	Meliaceae
Metabolite_6800	602.273	602.273	-0.849056	C00029765	Azedarachin B	C32H42O11	Melia azedarach	Fukuyama,Chem.Pharm.Bull.,54,(2006),1219	Melia	Meliaceae
Metabolite_5588	502.243	502.241	-3.60681	C00033314	Platanionoside F;(-)-Platanionoside F	C24H38O11	Alangium platanifolium (SIEB.et ZUCC.) HARMS var.platanifolium	Otsuka,Chem.Pharm.Bull.,50,(2002),390	Alangium	Cornaceae/Aucubaceae/Garryaceae/Helwingiaceae
Metabolite_5724	516.236	516.236	0.598952	C00013174	Vaalens 5;[3R-[3alpha,5beta(E),5aalpha,6alpha,9beta,9aalpha,10R*]]-10-(Acetyloxy)octahydro-9-hydroxy-6-[(hydroxyacetyl)oxy]-2,2,5a,9-tetramethyl-2H-3,9a-methano-1-benzoxepin-5-yl ester 3-phenyl-2-propenoic acid	C28H36O9	Catha transvaalensis	Gonzalez,Phytochem.,27,(1988),437;Crombie,J.Chem.Soc.Perkin Trans.,1,(1989),1700	Catha	Celastraceae
Metabolite_4380	408.376	408.376	-0.298786	C00000915	4,4'-Diapophytoene	C30H48	Staphylococcus aureus	Wieland,J. Bacteriol.,176,(1994),7719	Staphylococcus	Staphylococcaceae
Metabolite_8333	720.37	720.372	2.73238	C00029742	Arvenin I	C38H56O13	Anagallis arvensis L.	Yamada,Tetrahedron Lett.,(1977),2099	Anagallis	Myrsinaceae
Metabolite_6305	568.326	568.326	-0.0675339	C00018501	Antibiotic FR 900261;WF 3161	C31H44N4O6	Petriella guttulata No. 3161	Umehara,J. Antibiotics,36,(1983),478	Petriella	Poaceae
Metabolite_6782	600.406	600.403	-5.52863	C00038733	Charantoside III;(-)-Charantoside III	C36H56O7	Momordica charantia	Akihisa,J.Nat.Prod.,70,(2007),1233	Momordica	Cucurbitaceae
Metabolite_1182	179.093	179.095	8.9624	C00001915	Salsolinol;(-)-Salsolinol	C10H13NO2	Musa x paradisiaca	Harborne,Phytochemical Dictionary Second Edition,Taylor and Francis,(1999),Chapter21	Musa	Musaceae
Metabolite_2536	262.048	262.048	0.81857	C00003003	Maclurin	C13H10O6	Garcinia multiflora	Chiang,J.Nat.Prod.,66,(2003),1070	Garcinia	Clusiaceae/Clusiaceae-Guttiferae
Metabolite_1151	176.119	176.12	5.06237	C00017464	11,12,13-Trinor-6,9-eremophiladien-8-one	C12H16O	Senecio humillimus	Bohlmann,Phytochem.,20,(1981),1739	Senecio	Asteraceae
Metabolite_7343	630.123	630.122	-1.64851	C00006008	Isorhamnetin 3-(6''-galloylglucoside)	C29H26O16	Quercus cerris	Harborne, The Handbook of Natural Flavonoids, 1, (1999), 297.Flavonol O-glycosides;Romussi,Liebigs Ann.Chem.,(1988),989	Quercus	Fagaceae
Metabolite_8337	722.199	722.2	1.13213	C00019722	Formononetin 7-O-(2'',6''-di-O-(E-p-coumaroyl)glucoside);7-Hydroxy-4'-methoxyisoflavone 7-O-(2'',6'-di-O-E-p-coumaroyl)-glucoside	C40H34O13	Pterocarpus marsupium	Singh,J. Inst. Chem.,71,(1999),103	Pterocarpus	Fabaceae
Metabolite_6252	566.253	566.253	0.347331	C00011255	Okaramine B	C33H34N4O5	Penicillium simplicissimum	Cole,Handbook of Secondary Fungal Metabolites,Volume I,(2003);Murao,Agric.Biol.Chem.,52,(1988),885	Penicillium	Trichocomaceae
Metabolite_5746	517.338	517.34	3.89433	C00025509	Holarosine A	C30H47NO6	Holarrhena antidysenterica	Khuong-Huu,Bull.Soc.Chim.Fr.,(1971),864	Holarrhena	Apocynaceae
Metabolite_7490	638.264	638.263	-1.57826	C00025627	(-)-Secohomoaromoline;Secohomoaromoline	C37H38N2O8	Anisocycla jollyana (Pierre) Diels	Kanyinda,J.Nat.Prod.,59,(1996),498	Anisocycla	Menispermaceae
Metabolite_6283	567.322	567.32	-4.44326	C00027689	14-O-benzoylperegrine	C33H45NO7	Delphinium munzianum Kit Tan	Fuente,Phytochem.,39,(1995),1467	Delphinium	Ranunculaceae
Metabolite_6779	600.29	600.293	6.37035	C00036750	Ardisiaquinone I	C33H44O10	Ardisia teysmanniana Scheff.	Yang,Phytochem.,58,(2001),1235	Ardisia	Myrsinaceae
Metabolite_1801	211.159	211.157	-9.91975	C00002337	Elaeokanine C	C12H21NO2	Elaeocarpus kaniensis	Harborne,Phytochemical Dictionary Second Edition,Taylor and Francis,(1999),Chapter31	Elaeocarpus	Elaeocarpaceae
Metabolite_3081	296.075	296.078	8.96604	C00012505	(1alpha,3beta,5beta)-(-)-2-(3-Bromo-2,2,5-trimethylcyclopentyl)-5-methylphenol	C15H21BrO	Laurencia imbricata	Coll,Aust.J.Chem.,42,(1989),1685	0	0
Metabolite_4739	441.177	441.179	3.46498	C00016272	Fleephilone	C24H27NO7	Trichoderma harzianum WC47695	Qian-Cutrone,J.Antibiotics 49,(1996),990	Trichoderma	Hypocreaceae
Metabolite_8090	685.36	685.357	-3.61662	C00001617	Avadharidine	C36H51N3O10	Aconitum finetianum	Harborne,Phytochemical Dictionary Second Edition,Taylor and Francis,(1999),Chapter19	Aconitum	Ranunculaceae
Metabolite_7103	618.268	618.268	-0.156471	C00003607	Bryotoxin A	C32H42O12	Bryophyllum tubiflorum	Harborne,Phytochemical Dictionary Second Edition,Taylor and Francis,(1999),Chapter55	Bryophyllum	Crassulaceae
Metabolite_1622	203.132	203.131	-5.46138	C00026590	Paniculidine C	C13H17NO	Murraya paniculata	Kinoshita,Phytochem.,28,(1989),147	Murraya	Rutaceae
Metabolite_54	89.0476	89.0477	0.616827	C00001332	L-Alanine	C3H7NO2	Arabidopsis thaliana	Nikiforova,Plant Physiol.,138,82005),304	Arabidopsis	Cruciferae
Metabolite_7021	612.279	612.278	-0.868976	C00044344	Taxayuntin J;(-)-Taxayuntin J	C30H44O13	Taxus yunnanensis	Zhou,Phytochem.,48,(1998),1387	Taxus	Taxaceae
Metabolite_2841	280.14	280.142	9.57939	C00042169	7alpha-Hydroxycatuabine H;(-)-7alpha-Hydroxycatuabine H;(-)-	C14H20N2O4	Erythroxylum vacciniifolium	Zanolari,J.Nat.Prod.,68,(2005),1153	Erythroxylum	Erythroxylaceae
Metabolite_3730	345.122	345.121	-3.43706	C00001564	Candimine	C18H19NO6	Hippeastrum candidum	Harborne,Phytochemical Dictionary Second Edition,Taylor and Francis,(1999),Chapter17	Hippeastrum	Amaryllidaceae
Metabolite_4243	395.982	395.986	9.54756	C00021620	2,10-Dibromo-3-chloro-alpha-chamigrene;4,10-Dibromo-3-chloro-alpha-chamigrene;(-)-4,10-Dibromo-3-chloro-alpha-chamigrene	C15H23Br2Cl	Phytophthora nicotianae	Capasso,Phytochem.,50,(1999),703	Phytophthora	Pythiaceae
Metabolite_5430	489.261	489.263	4.15539	C00028957	Sanjoinenine	C29H35N3O4	Zizyphus jujube var. inermis	Martinez-Luis,Phytochem.,68,(2007),1882	0	0
Metabolite_5719	516.215	516.215	0.542078	C00019397	Euchrenone b11;5,5'-Dihydroxy-2'-methoxy-6-prenyl-(2'',3'':7,8),(2''',3''':4',3')-bis(6,6-dimethylpyrano)isoflavone	C31H32O7	Euchresta japonica	Mizuno,Phytochem.,31,(1992),675	Euchresta	Fabaceae
Metabolite_3738	346.122	346.121	-4.08668	C00013427	Ovalifolin;6-[(3-Methyl-2-butenyl)oxy]-2-phenyl-4H-furo[2,3-h]-1-benzopyran-4-one	C22H18O4	Millettia erythrocalyx	Sritularek,J.Nat.Prod.,65,(2002),589	Millettia	Fabaceae
Metabolite_4411	414.228	414.227	-2.21635	C00001521	Tentoxin	C22H30N4O4	Alternaria porri	Horiuchi,J.Nat.Prod.,65,(2002),1204	Alternaria	Dothideomycetes
Metabolite_7682	652.33	652.336	8.51953	C00016217	Hydroxymycotrienin A	C36H48N2O9	Bacillus sp. BMJ958-62F4	Hosokawa,J.Antibiotics 49,(1996),425	Bacillus	Bacillaceae
Metabolite_5585	502.247	502.247	-0.102215	C00024334	(-)-Rauvomitine	C30H34N2O5	Rauvolfia obscura	Timmins,Planta Med.,29,(1976),283	Rauvolfia	Apocynaceae
Metabolite_7023	612.286	612.284	-3.22057	C00016144	Aestivophoenin B	C36H40N2O7	Streptomyces purpeofuscus	Shin-ya,J.Antibiotics 48,(1995),1378	Streptomyces	Streptomycetaceae
Metabolite_3552	332.077	332.074	-7.15748	C00002652	beta-Glucogallin	C13H16O10	Eskemukerjea megacarpum HARA	Miyaichi,Chem.Pharm.Bull.,54,(2006),136	Eskemukerjea	Polygonaceae
Metabolite_3713	344.132	344.132	0.401191	C00001159	Clusianose	C12H24O11	Primula clusiana	Harborne,Phytochemical Dictionary Second Edition,Taylor and Francis,(1999),Chapter4	Primula	Primulaceae
Metabolite_3711	344.062	344.062	0.867607	C00011550	6beta-Hydroxyaplysistatin	C15H21BrO4	Laurencia filiformis	Capon,Tetrahedron,37,(1981),1613	0	0
Metabolite_5636	505.206	505.21	7.57864	C00027375	Hernandaline;(+)-Hernandaline	C29H31NO7	Cocculus pendulus	Al-Khalil,Planta Med.,59,(1993),276	Cocculus	Menispermaceae
Metabolite_7079	615.293	615.296	5.32692	C00017719	Bu 2659A;Inosamycin A	C23H45N5O14	Streptomyces hygroscopicus No.J296-21 (ATCC 39150)	Tsunakawa,J.Antibiotics,38,(1985),1302	Streptomyces	Streptomycetaceae
Metabolite_7997	676.348	676.346	-2.73	C00016903	Aquastatin A	C36H52O12	Fusarium aquaeductuum SANK 11089	Hamano,J.Antibiotics 46,(1993),1648	0	0
Metabolite_7006	612.133	612.133	0.0423503	C00005736	Myricetin 3-sambubioside	C26H28O17	Astragalus complanatus	Harborne, The Handbook of Natural Flavonoids, 1, (1999), 297.Flavonol O-glycosides;Cui,Chem.Pharm.Bull.,41,(1993),178	Astragalus	Fabaceae
Metabolite_8070	684.28	684.278	-2.67735	C00020841	Picrioside B	C36H44O13	Picris hieracioides	Uchiyama,Phytochem.,29,(1990),2947	Picris	Asteraceae
Metabolite_5761	518.223	518.226	7.53947	C00043477	Echitamidine-N-oxide 19-O-beta-D-glucopyranoside	C26H34N2O9	Alstonia scholaris	Salim,J.Nat.Prod.,67,(2004),1591	Alstonia	Apocynaceae
Metabolite_694	146.024	146.022	-7.75066	C00001243	Diallyl disulfide	C6H10S2	Allium cepa	Harborne,Phytochemical Dictionary Second Edition,Taylor and Francis,(1999),Chapter7	Allium	Alliaceae
Metabolite_3766	348.113	348.112	-1.55741	C00018787	Antibiotic 593A;DKP 593A;NSC 135-758	C14H22Cl2N4O2	Streptomyces griseoluteus	Gitterman,J. Antibiotics 23,(1970),305	Streptomyces	Streptomycetaceae
Metabolite_3870	359.084	359.085	4.79614	C00001457	Triglochinin	C14H17NO10	Triglochin maritima	Harborne,Phytochemical Dictionary Second Edition,Taylor and Francis,(1999),Chapter12	Triglochin	Juncaginaceae
Metabolite_7350	630.396	630.393	-3.72256	C00025052	(-)-Pleiomutine	C41H50N4O2	Pleiocarpa mutica	Kump,Helv.Chim.Acta,44,(1961),1503; Thomas,J.Am.Chem.Soc.,1966),1537; Hesse,Helv.Chim.Acta,49,(1966),964	Pleiocarpa	Apocynaceae
Metabolite_5065	464.053	464.056	5.41484	C00000127	4-Hydroxyglucobrassicin;4-Hydroxy-3-indolylmethylglucosinolate	C16H20N2O10S2	Tovaria pendula Ruiz.et Pav.	Schraudolf,Z.Naturforsch.,41C,(1986),526	Tovaria	Tovariaceae
Metabolite_2492	259.048	259.048	-0.969481	C00026455	Megistoquinone I	C13H9NO5	Sarcomelicope megistophylla	Fokialakis,Chem.Pharm.Bull.,50,(2002),413	Sarcomelicope	Rutaceae
Metabolite_8676	793.42	793.425	5.96425	C00002256	Protoveratrine A	C41H63NO14	Veratrum album	Harborne,Phytochemical Dictionary Second Edition,Taylor and Francis,(1999),Chapter29	Veratrum	Melanthiaceae
Metabolite_337	121.019	121.02	3.51725	C00001351	L-Cysteine	C3H7NO2S	Trifolium repens L.	Kitagawa,Chem.Pharm.Bull.,24,(1976),121	Trifolium	Fabaceae
Metabolite_950	162.106	162.104	-6.52961	C00000247	Caudoxirene	C11H14O	Perithalia caudata	Mueller,Biol. Chem. Hoppe-Seyler ,369,(1988),655	Perithalia	Sporochnaceae
Metabolite_4984	459.205	459.208	6.83222	C00018134	Glycinothricin	C17H29N7O8	Streptomyces griseus No.979	Sawada,J. Antibiotics,30,(1977),460	Streptomyces	Streptomycetaceae
Metabolite_5765	518.229	518.23	2.56622	C00019412	Euchretin N;5,7,4'-Trihydroxy-5'-methoxy-6,8,3'-triprenylcoumaronochromone	C31H34O7	Euchresta formosana	Lo,Planta Med.,68,(2002),146	Euchresta	Fabaceae
Metabolite_5084	464.387	464.387	-0.136525	C00043373	Certonardosterol D3	C29H52O4	Certonardoa semiregularis	Wang,J.Nat.Prod.,67,(2004),584	0	0
Metabolite_7129	620.261	620.262	1.16717	C00045826	Dantaxusin A;(+)-Dantaxusin A	C35H40O10	Taxus yunnanensis	Shinozaki,J.Nat.Prod.,64,(2001),1073	Taxus	Taxaceae
Metabolite_10233	1276.58	1276.59	7.64504	C00049187	Jenisseensoside C	C64H92O26	Silene fortunei	Lacaille-Dubois,J.Nat.Prod.,62,(1999),133	Silene	Caryophyllaceae
Metabolite_8214	700.344	700.347	3.98515	C00030604	Keayanine;Keayanine A	C39H48N4O8	Microdesmis keayana	Zamble,Chem.Pharm.Bull.,55,(2007),643	Microdesmis	Pandaceae
Metabolite_7285	624.369	624.373	7.85706	C00017627	Antibiotic MG 398HF9A; Octacosamicin A	C31H52N4O9	Amycolatopsis MG398-hF9	Dobashi,J.Antibiotics,41,(1988),1525	Amycolatopsis	Pseudonocardiaceae
Metabolite_5076	464.194	464.195	0.674487	C00027611	(-)-Secoplicamine	C26H28N2O6	Galanthus plicatus spp.byzantinus	Unver,Phytochem.,50,(1999),1255	Galanthus	Amaryllidaceae
Metabolite_8176	694.37	694.372	1.97934	C00011593	(4,4'-Dihydroxy-2,2'-dimethyl-3,3',6,6'-tetraoxo[1,1'-bi-1,4-cyclohexadien-1-yl]-5,5'-diyl)bis(2,6-dimethyl-2-hexene-6,1-diyl) ester 2-methyl-butanoic acid	C40H54O10	Coreocarpus arizonicus	Jolad,Phytochem.,27,(1988),3545	Coreocarpus	Asteraceae
Metabolite_7081	615.308	615.304	-5.65067	C00001644	Hypaconitine	C33H45NO10	Aconitum tortuosum	Ochiai,Chem.Pharm.Bull.,8,(1960),976	Aconitum	Ranunculaceae
Metabolite_8215	700.362	700.357	-7.01503	C00001624	Cashmiradelphine	C37H52N2O11	Aconitum septentrionale	Harborne,Phytochemical Dictionary Second Edition,Taylor and Francis,(1999),Chapter19	Aconitum	Ranunculaceae
Metabolite_2522	260.216	260.214	-8.10115	C00022180	Dinortrixagone	C18H28O	Bellardia trixago	de Pascual,Tetrahedron,38,(1982),1837	Bellardia	Orobanchaceae
Metabolite_7998	676.368	676.368	-0.117742	C00042586	Hirsutatin A;(-)-Hirsutatin A	C34H52N4O10	Hirsutella nivea BCC2594	Isaka,J.Nat.Prod.,68,(2005),1680	Hirsutella	Clavicipitaceae
Metabolite_7127	620.264	620.263	-1.19084	C00000323	Methyl pheophorbide b	C36H36N4O6	Diospyros kaki	Hayashi,Syokubutu kagaku kennkyukai syouwa 52-nendo taikai kenkyu hapyo kiroku syuu,(1977),9-	Diospyros	Ebenaceae
Metabolite_7125	620.243	620.247	6.23593	C00030495	Hydrangenoside A	C31H40O13	Hydrangea chinensis	Patnam,J.Nat.Prod.,64,(2001),948	Hydrangea	Hydrangeaceae
Metabolite_328	119.059	119.058	-8.23452	C00001366	L-Homoserine	C4H9NO3	Arabidopsis thaliana	Nikiforova,Plant Physiol.,138,(2005),304	Arabidopsis	Cruciferae
Metabolite_2482	258.016	258.014	-8.35267	C00019434	2-keto-3-Deoxy-6-phosphogluconic acid	C6H11O9P	Escherichia coli	Conway,J. Bacteriol.,173,(1991),5247	Escherichia	Enterobacteriaceae
Metabolite_5173	472.139	472.137	-4.18641	C00010156	Formononetin 7-O-(6''-acetylglcoside)	C24H24O10	Ononis speciosa	Harborne, The Handbook of Natural Flavonoids, 2, (1999), 517,Isoflavonoids and neoflavonoids;Barrero,Phytochem.,28,(1989),161	Ononis	Fabaceae
Metabolite_8791	813.488	813.489	1.06928	C00016371	BE 32030C	C43H67N5O10	Nocardia sp. A32030	Tsukamoto,J.Antibiotics 50,(1997),815	Nocardia	Nocardiaceae
Metabolite_4977	458.214	458.215	1.90688	C00024028	Marioside	C22H34O10	Davallia mariesii MOORE	Cui C.-B.,Chem.Pharm.Bull.,40,(1992),2035-2040	Davallia	Davalliaceae
Metabolite_8910	872.406	872.404	-1.99871	C00003638	K-strophanthoside	C42H64O19	Strophanthus kombe	Harborne,Phytochemical Dictionary Second Edition,Taylor and Francis,(1999),Chapter55	Strophanthus	Apocynaceae
Metabolite_8911	872.454	872.456	2.29004	C00040236	Saundersioside H;(-)-Saundersioside H	C47H68O15	Ornithogalum saundersiae	Kuroda,Phytochem.,52,(1999),435	Ornithogalum	Hyacinthaceae
Metabolite_322	118.028	118.027	-7.75137	C00001205	Succinic acid	C4H6O4	Onopordum acanthium	Drozdz,Collect.Czech.Chem.Commun.,33,(1968),1730	Onopordum	Asteraceae
Metabolite_8912	872.479	872.477	-2.60485	C00029747	Asparoside B;Asparagusin A	C44H72O17	Smilax aspera subsp.mauritanica (POIR.) ARCANG.	Belhouchet,Chem.Pharm.Bull.,56,(2008),1324	Smilax	Smilacaceae
Metabolite_140	104.01	104.011	6.10578	C00001193	Malonic acid	C3H4O4	Phaseolus coccineus	Harborne,Phytochemical Dictionary Second Edition,Taylor and Francis,(1999),Chapter5	Phaseolus	Fabaceae
Metabolite_5895	530.245	530.242	-6.67001	C00024295	Vincamajine 17-O-veratrate	C31H34N2O6	Alstonia vieillardii	Cosson,Universite de Paris-Sud.Orsay,(1975)	Alstonia	Apocynaceae
Metabolite_2713	275.114	275.116	5.9411	C00002153	Dubinidine	C15H17NO4	Haplophyllum foliosum Vved.	Razzakova,Khim.Prir.Soedin.,133,(1972),755	Haplophyllum	Rutaceae
Metabolite_652	144.042	144.042	0.938586	C00017967	(-)-Pentenomycin I;Antibiotic C 2554B;Antibiotic XB 94;Pentenomycin I	C6H8O4	Streptomyces eurythermus MCRL 0738	Umino,J.Antibiotics,26,(1973),506	Streptomyces	Streptomycetaceae
Metabolite_7287	624.388	624.387	-1.72255	C00030666	Linckoside F;(-)-Linckoside F	C34H56O10	Linckia laevigata	Han,J.Nat.Med.,61,(2007),138	Linckia	Ophidiasteridae
Metabolite_5694	514.212	514.214	3.59981	C00018185	Antibiotic B 98891;Mildiomycin;TF 138	C19H30N8O9	Streptomyces rimofaciens B-98891	Iwasa,J. Antibiotics,31,(1978),511	Streptomyces	Streptomycetaceae
Metabolite_8210	700.333	700.331	-3.00223	C00047378	Alpindenoside D	C34H52O15	Alpinia densespicata	Kuo,J.Nat.Prod.,72,(2009),1097	Alpinia	Zingiberaceae
Metabolite_2392	250.049	250.048	-3.14138	C00015711	Aureoquinone	C12H10O6	Aureobasidium sp.	Berg,J.Antibiotics,53,(2000),1293	Aureobasidium	Dothioraceae
Metabolite_8137	690.293	690.289	-6.03714	C00016820	GR 105155X;L 694599;Squalestatin;Squalestatin 1;Squalestatin S1;Zaragozic acid A	C35H46O14	Setosphaeria khartoumensis L1685	Hasumi,J.Antibiotics 46,(1993),689	Setosphaeria	Pleosporaceae
Metabolite_2643	268.159	268.158	-6.93724	C00018182	1,3-Diphenethylurea;N,N'-Bis(phenethyl)urea;N,N'-Diphenethylurea;NSC 25433	C17H20N2O	Streptomyces sp. AM-2498	Weber,J. Antibiotics,31,(1978),375	Streptomyces	Streptomycetaceae
Metabolite_2378	249.109	249.111	8.10007	C00016047	NI 15501A	C12H15N3O3	Penicillium sp. NI15501	Onuki,J.Antibiotics 51,(1998),442	Penicillium	Trichocomaceae
Metabolite_5693	514.156	514.161	9.43552	C00045703	Brianolide	C24H31ClO10	Braiareum stechei	Kwaw,J.Nat.Prod.,64,(2001),754	0	0
Metabolite_888	158.085	158.084	-5.85266	C00002058	Nicotyrine	C10H10N2	Nicotiana tabacum	Harborne,Phytochemical Dictionary Second Edition,Taylor and Francis,(1999),Chapter25	Nicotiana	Solanaceae
Metabolite_3830	354.123	354.123	0.785057	C00018508	Oudemansin B	C18H23ClO5	Xerula longipes	Anke,J. Antibiotics,36,(1983),661	Xerula	Physalacriaceae
Metabolite_940	162.053	162.053	-0.61781	C00001187	3-Hydroxy-3-methylglutaric acid	C6H10O5	Crotalaria dura	Harborne,Phytochemical Dictionary Second Edition,Taylor and Francis,(1999),Chapter5	Crotalaria	Fabaceae
Metabolite_5687	512.383	512.387	6.90221	C00043238	Acetyl eburicoic acid;(+)-Acetyl eburicoic acid	C33H52O4	Laetiporus sulphureus	Leon,J.Nat.Prod.,67,(2004),2008	Laetiporus	Polyporaceae
Metabolite_2425	252.062	252.063	3.82669	C00024186	Cladobotrin III	C12H12O6	Cladobotryum varium NEES et Duby(=Didymocladium ternatum BON.)	Tezuka Y.,Chem.Pharm.Bull.,42,(1994),2612-2616	Cladobotryum	Hypocreaceae
Metabolite_3648	338.064	338.063	-4.06307	C00007383	AICAR;5-Amino-4-imidazolecarboxamide ribonucleotide	C9H15N4O8P	Arabidopsis thaliana	Boldt,Physiologia Plantarum,117,(2003),297	Arabidopsis	Cruciferae
Metabolite_2619	266.126	266.127	4.25936	C00014974	Jenamidine B	C13H18N2O4	Streptomyces sp. HKI0297	Hu,J.Antibiotics 56,(2003),747	Streptomyces	Streptomycetaceae
Metabolite_2620	266.141	266.142	2.96707	C00001691	Borreline	C17H18N2O	Borreira capitata	Jossang,Planta Med.,43,(1981),301	0	0
Metabolite_5722	516.223	516.221	-5.12752	C00042418	Cucurbitoside F;(-)-Cucurbitoside F	C24H36O12	Cucurbita pepo	Li,J.Nat.Prod.,68,(2005),1754	Cucurbita	Cucurbitaceae
Metabolite_7328	627.343	627.341	-3.01491	C00028276	Foresaconitine;Vilmorrianine C	C35H49NO9	Aconitum carmichaeli	Shim,Chem.Pharm.Bull.,51,(2003),999	Aconitum	Ranunculaceae
Metabolite_3665	340.102	340.104	4.61446	C00034316	Tiomanene	C17H25BrO2	Laurencia sp.	Blunt,Nat.Prod.Rep.,27,(2010),165	0	0
Metabolite_3526	330.196	330.194	-4.7876	C00027053	Alstonoxine B	C19H26N2O3	Alstonia angustifolia var.latifolia	Kam,Phytochem.,65,(2004),603	Alstonia	Apocynaceae
Metabolite_5839	524.251	524.252	3.10532	C00027705	19alpha-Hydroxygelsamydine	C29H36N2O7	Gelsemium elegans	Lin,Phytochem.,43,(1996),723	Gelsemium	Gelsemiaceae
Metabolite_2419	251.116	251.116	0.137349	C00016867	3097C2	C13H17NO4	Streptomyces SA3097	Hosoya,J.Antibiotics 46,(1993),1300	Streptomyces	Streptomycetaceae
Metabolite_885	158.057	158.058	6.23354	C00015390	FO 6903B;Pentenocin B	C7H10O4	Trichoderma hamatum FO-6903	Matsumoto,J.Antibiotics 52,(1999),754	Trichoderma	Hypocreaceae
Metabolite_7107	619.09	619.093	3.84318	C00019354	ADP-L-glycero-beta-D-manno-heptopyranose	C17H27N5O16P2	Escherichia coli	Valvano,J. Bacteriol.,182,(2000),488	Escherichia	Enterobacteriaceae
Metabolite_8123	687.366	687.367	2.32503	C00011294	Cryptoechinulin B	C43H49N3O5	Eurotium amstelodami	Cole,Handbook of Secondary Fungal Metabolites,Volume I,(2003);Gardillo,La Chimica E L'Industria,57,(1975),678;Gatti,J.C.S.Chem.Comm.,(1976),435	Eurotium	Trichocomaceae
Metabolite_997	165.081	165.079	-9.35883	C00001386	L-Phenylalanine	C9H11NO2	Zyzzya fuliginosa	Tasdemir,Chem.Pharm.Bull.,49,(2001),1428	0	0
Metabolite_2398	250.088	250.087	-0.11649	C00007642	2-(5'-methylthio)pentylmalic acid	C10H18O5S	Arabidopsis thaliana	Textor,Planta,218,(2004),1026	Arabidopsis	Cruciferae
Metabolite_3650	338.089	338.088	-2.60485	C00033611	Acetylmajapolene B;(-)-Acetylmajapolene B	C17H23BrO2	Laurencia spp.	Vairappan,Phytochem.,69,(2008),2490	0	0
Metabolite_8121	687.373	687.374	2.19502	C00028328	Haligramide A	C37H49N7O6	Haliclona nigra	Rashid,J.Nat.Prod.,63,(2000),956	0	0
Metabolite_3834	354.159	354.158	-2.72856	C00025060	(+)-Andrangine	C20H22N2O4	Craspidospermum verticillatum	Kan-Fan,Bull.Soc.Chim.Fr.,(1974),2839	Craspidospermum	Apocynaceae
Metabolite_677	145.054	145.053	-9.3738	C00000112	Indole-3-carboxaldehyde;1H-Indole-3-carboxaldehyde	C9H7NO	Streptomyces sp. M491	Wu,J.Nat.Prod.,70,(2007),304	Streptomyces	Streptomycetaceae
Metabolite_5885	528.352	528.356	8.51529	C00014889	FR 252922;Pseudotrienic acid A lactone	C31H48N2O5	Pseudomonas fluorescens No.408813	Fujine,J.Antibiotics 56,(2003),55	Pseudomonas	Pseudomonadaceae
Metabolite_2565	264.061	264.063	9.71194	C00019766	7-Acetoxy-5,6-dimethoxycoumarin	C13H12O6	Pelargonium sidoides	Kayser,Phytochem.,39,(1995),1181	Pelargonium	Geraniaceae
Metabolite_3689	342.12	342.119	-1.9892	C00044516	alpha-Snyderol acetate	C17H27BrO2	Laurencia obtusa	Topcu,J.Nat.Prod.,66,(2003),1505	0	0
Metabolite_5660	508.32	508.319	-3.04737	C00045410	Stellettin H;(-)-Stellettin H	C32H44O5	Rhabdastrella globostellata	Tasdemir,J.Nat.Prod.,65,(2002),210	0	0
Metabolite_5664	510.221	510.225	8.12291	C00000496	Pungiolide A	C29H34O8	Xanthium pungens	Ahmed,Phytochem.,29,(1990),2211	Xanthium	Asteraceae
Metabolite_3857	358.15	358.153	8.79032	C00029391	14,15-Dihydroxygelsenicine	C19H22N2O5	Gelsemium elegans	Kitajima,J.Nat.Med.,61,(2007),14	Gelsemium	Gelsemiaceae
Metabolite_7066	614.317	614.32	5.38406	C00028172	Desacetyleleutherobin	C33H46N2O9	Erythropodium caribaeorum	Cinel,Org.Lett.,2,(2000),257	0	0
Metabolite_3694	342.166	342.164	-7.28629	C00018112	Sorbistin C	C12H26N2O9	Pseudomonas sorbicinii sp. nov. D496-B83	Tsukiura,J. Antibiotics,29,(1976),1137	Pseudomonas	Pseudomonadaceae
Metabolite_5558	500.213	500.216	6.68205	C00024549	Kopsidine B	C26H32N2O8	Kopsia teoi	Kam,Tetrahedron Lett.,34,(1993),1819	Kopsia	Apocynaceae
Metabolite_6950	610.166	610.169	4.2898	C00014342	4'-O-Methylcarthamidin 7-(2-p-coumaroylglucoside);5,6,7-Trihydroxy-4'-methoxyflavanone 7-(2-p-coumaroylglucoside)	C31H30O13	Crotalaria prostrata	Yadava,J.Inst.Chem.(India),71,(1999),231	Crotalaria	Fabaceae
Metabolite_5805	521.201	521.205	7.94971	C00038671	C-3'-Hydroxyrocaglamide;(-)-C-3'-Hydroxyrocaglamide	C29H31NO8	Aglaia duperreana	Hiort,Phytochem.,52,(1999),837	Aglaia	Meliaceae
Metabolite_8782	812.487	812.492	6.74894	C00030603	Karaviloside V;(+)-Karaviloside V	C43H72O14	Momordica charantia L.	Nakamura,Chem.Pharm.Bull.,54,(2006),1545	Momordica	Cucurbitaceae
Metabolite_3773	349.228	349.225	-7.20183	C00025374	Acetylfawcettiine;Fawcettiine acetate;beta-Lofoline acetate;O-Acetylfawcettiine	C20H31NO4	Lycopodium annotinum	Rodewald,Bull.Acad.Pol.Sci.Ser.Sci.Chim.,15,(1967),579	Lycopodium	Lycopodiaceae
Metabolite_7029	612.319	612.315	-6.4453	C00032867	Cussoracoside B;(-)-Cussoracoside B	C31H48O12	Cussonia racemosa	Harinantenaina,Chem.Pharm.Bull.,50,(2002),268	Cussonia	Araliaceae
Metabolite_5650	507.185	507.189	8.26784	C00042600	Hygrocin B	C28H29NO8	Streptomyces hygroscopicus	Cai,J.Nat.Prod.,68,(2005),1736	Streptomyces	Streptomycetaceae
Metabolite_948	162.09	162.089	-6.25959	C00001114	D-Cymarose;2,6-Dideoxy-3-O-methyl-beta-D-ribo-hexopyranose	C7H14O4	Strophanthus kombe	Harborne,Phytochemical Dictionary Second Edition,Taylor and Francis,(1999),Chapter1	Strophanthus	Apocynaceae
Metabolite_1015	167.044	167.044	4.19585	C00016393	Hydroxyakalone	C5H5N5O2	Agrobacterium aurantiacum N-81106	Izumida,J.Antibiotics 50,(1997),916	0	0
Metabolite_889	158.094	158.094	1.71268	C00050345	Cleroindicin B	C8H14O3	Clerodendrum indicum	Tian,J.Nat.Prod.,60,(1997),766	Clerodendrum	Labiatae
Metabolite_3856	358.147	358.145	-4.22805	C00036619	6-Gingesulfonic acid	C17H26O6S	Zingiber officinale ROSCOE	Hori,Phytochem.,62,(2003),613	Zingiber	Zingiberaceae
Metabolite_8021	680.298	680.298	0.0793519	C00016606	Chondramide B	C36H45ClN4O7	Chondromyces crocatus Cm c2	Kunze,J.Antibiotics 48,(1995),1262	Chondromyces	Polyangiaceae
Metabolite_5677	511.231	511.232	1.22622	C00011299	Verruculogen;Verruculogen TR 1;TR 1 toxin	C27H33N3O7	Penicillium janthinellum	Cole,Handbook of Secondary Fungal Metabolites,Volume I,(2003);Cole,Handbook of Toxic Fungal Metabolites,(1981),368	Penicillium	Trichocomaceae
Metabolite_8020	680.292	680.295	3.06737	C00035463	14-Demethyl-14-acetylanhweidelphinine	C36H44N2O11	Delphinium pentagynum	Diaz,Phytochem.,65,(2004),2123	Delphinium	Ranunculaceae
Metabolite_5819	522.361	522.356	-9.8967	C00030775	Mimosaside B;(-)-Mimosaside B	C30H50O7	Mimosa hostilis	Ohsaki,Chem.Pharm.Bull.,54,(2006),1728	Mimosa	Fabaceae
Metabolite_3625	336.167	336.166	-1.49937	C00026710	12-epi-Fischerindole U isothiocyanate;(+)-12-epi-Fischerindole U isothiocyanate	C21H24N2S	Hapalosiphon welwitschii	Stratmann,J.Am.Chem.Soc.,116,(1994),9935	0	0
Metabolite_2359	248.115	248.116	4.71087	C00007738	12-Carboxycytisine methyl ester;N-Carbomethoxycytisine	C13H16N2O3	Petteria ramentacea	Ohmiya,The Alkaloids,47,(1995),1,Lupine alkaloids;Veen,Phytochem.,31,(1992),3487	Petteria	Fabaceae
Metabolite_2865	282.218	282.219	6.9849	C00045561	3-Epilitsenolide D1;(-)-3-Epilitsenolide D1	C17H30O3	Alseodaphne andersonii	Lee,J.Nat.Prod.,64,(2001),1548	Alseodaphne	Lauraceae
Metabolite_2574	264.122	264.121	-4.6212	C00010546	Eccremocarpol B	C11H20O7	Eccremocarpus scaber	Garbarino,Phytochem.,28,(1989),697	Eccremocarpus	Bignoniaceae
Metabolite_3852	357.179	357.179	0.0802861	C00002126	Uplandicine	C17H27NO7	Symphytum x.uplandicum	Culvenor,Aust.J.Chem.,33,(1980),1105	Symphytum	Boraginaceae
Metabolite_7065	614.313	614.309	-5.73955	C00047792	Chisonimbolinin B;(-)-Chisonimbolinin B	C34H46O10	Chisocheton paniculatus	Yang,J.Nat.Prod.,72,(2009),2014	Chisocheton	Meliaceae
Metabolite_2859	282.109	282.11	6.07833	C00041277	4-Keto-clonostachydiol;(+)-4-Keto-clonostachydiol	C14H18O6	Gliocladium sp.	Lang,J.Nat.Prod.,69,(2006),621	Gliocladium	Hypocreaceae
Metabolite_361	123.033	123.032	-8.90123	C00000208	Nicotinic acid	C6H5NO2	Mortierella vinacea	Soman,J.Nat.Prod.,62,(1999),386	Mortierella	Mortierellaceae
Metabolite_2674	272.034	272.032	-6.01238	C00044412	1,7-Dihydroxy-2,3-methylenedioxyxanthone	C14H8O6	Polygala fallax	Ma,J.Nat.Prod.,66,(2003),441	Polygala	Polygalaceae
Metabolite_6951	610.178	610.184	9.95377	C00031835	Guangsangon M;(-)-Guangsangon M	C35H30O10	Morus macroura	Dai,Chem.Pharm.Bull.,52,(2004),1190	Morus	Moraceae
Metabolite_6309	568.344	568.34	-7.77644	C00017540	Antibiotic VM 44857;VM 44857	C34H48O7	Streptomyces sp. E225	Hood,J.Antibiotics,42,(1989),1593	Streptomyces	Streptomycetaceae
Metabolite_7706	652.522	652.522	-0.294449	C00046296	Petrotetraynol A	C46H68O2	Petrosia sp.	Lim,J.Nat.Prod.,64,(2001),46	0	0
Metabolite_7501	638.34	638.343	4.18947	C00047098	Stephanotic acid	C33H46N6O7	Stephanotis floribunda	Yoshikawa,J.Nat.Prod.,63,(2000),540	Stephanotis	Apocynaceae
Metabolite_6317	569.293	569.291	-4.04305	C00018173	6'-N-Methylbutirosin A	C22H43N5O12	Bacillus circulans MCRL 5003	Takeda,J. Antibiotics,31,(1978),247	Bacillus	Bacillaceae
Metabolite_7187	622.315	622.314	-0.547119	C00023145	4,4'-Diapo-psi,psi-Carotenedioic acid mono-beta-D-glucopyranosyl ester	C36H46O9	Methylobacterium rhodinum	Kleinig,Z. Naturforsch. C.34,(1979),181	Methylobacterium	Methylobacteriaceae
Metabolite_4378	408.323	408.324	1.80333	C00038998	Diacarnoxide A	C25H44O4	Diacarnus levii	Dai,J.Nat.Prod.,70,(2007),130	0	0
Metabolite_4377	408.28	408.278	-4.51933	C00041236	12,28-Oxaircinal A;(+)-12,28-Oxaircinal A	C26H36N2O2	Acanthostrongylophora sp.	Karunanchi,J.Nat.Prod.,69,(2006),1034	0	0
Metabolite_4374	408.224	408.226	4.19675	C00046482	Tupuseleiamide A;(-)-Tupuseleiamide A	C21H32N2O6	Bacillus laterosporus	Barsby,J.Nat.Prod.,65,(2002),1447	Bacillus	Bacillaceae
Metabolite_3285	313.087	313.088	4.0689	C00026734	Bacillamide;Microbiaeratinin	C16H15N3O2S	Bacillus sp.SY-1	Jeong,Tetrahedron Lett.,44,(2003),8005	Bacillus	Bacillaceae
Metabolite_8338	722.227	722.232	6.49253	C00026973	Jaspamide B	C36H43BrN4O7	Jaspis splendans	Zampella,J.Nat.Prod.,62,(1999),332	0	0
Metabolite_7729	653.428	653.425	-4.58055	C00016733	Enniatin B4;Enniatin D	C34H59N3O9	Fusarium sp. FO-1305	Naganuma,J.Antibiotics 45,(1992),1207	0	0
Metabolite_6277	567.29	567.294	8.33278	C00047440	Dracotanoside C;(-)-Dracotanoside C	C31H41N3O7	Dracocephalum tanguricum	Wang,J.Nat.Prod.,72,(2009),1006	Dracocephalum	Labiatae
Metabolite_7724	653.364	653.364	0.106126	C00015124	HC 70I;Pyloricidin A	C31H51N5O10	Bacillus sp. HC-70	Nakao,J.Antibiotics 54,(2001),926	Bacillus	Bacillaceae
Metabolite_4757	442.178	442.178	0.905501	C00015845	Perrottetin F;Perrottetine F	C28H26O5	Radula perrottetii	Asakawa,Phytochem.,30,(1991),235;Toyota,Tetrahedron Lett.,26,(1985),6097	0	0
Metabolite_4758	442.212	442.21	-4.37991	C00024490	14-Hydroxycathovaline	C24H30N2O6	Catharanthus ovalis	Langlois,Phytochem.,18,(1979),467	Catharanthus	Apocynaceae
Metabolite_7506	638.35	638.345	-6.48607	C00003469	Pimelea factor P2	C37H50O9	Dirca occidentalis	Badawi,J.Pharm.Sci.,72,(1983),1285	Dirca	Thymelaeaceae
Metabolite_4395	412.137	412.137	0.784788	C00032923	Dracunculifoside J;(-)-Dracunculifoside J	C19H24O10	Baccharis dracunculifolia DC.	Nagatani,Chem.Pharm.Bull.,49,(2001),1388	Baccharis	Asteraceae
Metabolite_1571	200.12	200.12	-1.54115	C00013216	Dehydrochamecynenal;(4aalpha,7alpha,8aalpha)-7-Ethynyl-4a,5,6,7,8,8a-Hexahydro-4a-methyl-1-naphthalenecarboxaldehyde	C14H16O	Chamaecyparis formosensis	Asao,Tetrahedron Lett.,(1968),3639	Chamaecyparis	Cupressaceae
Metabolite_4426	416.129	416.132	7.78134	C00032701	Alpinoside;(-)-Alpinoside	C18H24O11	Plantago alpina	Ronsted,Phytochem.,55,(2000),337	Plantago	Plantaginaceae
Metabolite_8449	742.461	742.466	6.83504	C00039890	Nyalolide;(+)-Nyalolide	C43H66O10	Sarcophyton elegans	Bishara,J.Nat.Prod.,70,(2007),1951	Sarcophyton	Orchidaceae
Metabolite_7678	652.29	652.29	-0.496538	C00028334	Haplophytine	C37H40N4O7	Haplophyllum cimicidum	Yates,J.Am.Chem.Soc.,95,(1973),7882	Haplophyllum	Rutaceae
Metabolite_9997	1212.57	1212.58	3.20706	C00041871	Solanigroside F;(-)-Solanigroside F	C56H92O28	Solanum nigrum	Zhao,J.Nat.Prod.,69,(2006),1158	Solanum	Solanaceae
Metabolite_4734	441.038	441.038	0.870168	C00016503	(-)-Pyralomicin 1c;Antibiotic MI 178-34F18B2;Pyralomicin 1c	C19H17Cl2NO7	Actinomadura spiralis MI178-34F18	Kawamura,J.Antibiotics 48,(1995),435	Actinomadura	Thermomonosporaceae
Metabolite_8346	722.351	722.351	-0.0929098	C00040916	Cheiranthoside IV;(+)-Cheiranthoside IV	C37H54O14	Erysimum chelranthoides	Lei,Phytochem.,49,(1998),1801	Erysimum	Cruciferae
Metabolite_3098	298.072	298.072	0.72041	C00044140	Cycloclinacoside A1	C10H18O8S	Clinacanthus nutans	Teshima,Phytochem.,48,(1998),831	Clinacanthus	Acanthaceae
Metabolite_6730	596.357	596.356	-1.80373	C00023651	Dideacetylfusicoccin;F/VII	C32H52O10	Fusicoccum amygdali	Ballio,Characterizetion of By-products of Fusicoccin in Culture Filtrates of Fusicoccum amygdali Del.;Experientia,26,(1970),349-351	Fusicoccum	Botryosphaeriaceae
Metabolite_4346	405.249	405.252	6.415	C00028469	Leuconine	C23H35NO5	Aconitum leucostomum Worosch.	Xiao-yi,Acta Bot.Sin.,38,(1996),995	Aconitum	Ranunculaceae
Metabolite_3054	294.076	294.074	-6.02143	C00039851	Nigrospoxydon C;(+)-Nigrospoxydon C	C14H14O7	Nigrospora sp. PSU-F5	Trisuwan,J.Nat.Prod.,71,(2008),1323	0	0
Metabolite_3052	294.038	294.038	-1.55168	C00002865	Tricrozarin A	C13H10O8	Tritonia crocosmaeflora	Harborne,Phytochemical Dictionary Second Edition,Taylor and Francis,(1999),Chapter43	Tritonia	Iridaceae
Metabolite_8332	720.25	720.248	-3.25488	C00010489	Radiatoside	C31H44O19	Argylia radiata	Bianco,J.Nat.Prod.,49,(1986),519	Argylia	Bignoniaceae
Metabolite_7180	622.25	622.247	-4.23988	C00036571	4'-Deoxykanokoside C	C27H42O16	Centranthus longiflorus ssp.longiflorus	Kuruuzum-Uz,Phytochem.,61,(2002),937	Centranthus	Valerianaceae/Linnaeaceae/Dipsacaceae/Diervillaceae
Metabolite_10065	1228.57	1228.57	1.87489	C00003574	Digitonin	C56H92O29	Digitalis lanata Ehrh.	Furuya,Phytochem.,11,(1972),1073;Kaiser,Experientia,21,(1965),575;Tschesche,Tetrahedron,18,(1962),959;Helmbold,Planta Med.,33,(1978),185	Digitalis	Plantaginaceae
Metabolite_1813	212.094	212.095	5.37246	C00001737	Harmine	C13H12N2O	Carex brevicollis DC.	Terent'eva,Khim.Prir.Soedin.,(1969),397	Carex	Cyperaceae
Metabolite_5413	488.228	488.231	7.16587	C00024317	Norrauvomitine	C29H32N2O5	Rauvolfia vomitoria	Iwu,Planta Med.,45,(1982),105; Iwu,Planta Med.,32,(1977),88;	Rauvolfia	Apocynaceae
Metabolite_6212	563.236	563.237	1.66446	C00043020	Stemofolinoside;(+)-Stemofolinoside	C28H37NO11	Stemona sp.	Sastraruji,J.Nat.Prod.,68,(2005),1763	Stemona	Stemonaceae
Metabolite_4267	398.16	398.158	-5.37756	C00012633	(3alpha,4beta,7alpha,8alpha)-12,13-Epoxytrichothec-9-ene-3,4,7,8,15-pentol 4,15-diacetate	C19H26O9	Fusarium spp.	Grove,J.Chem.Soc.C,(1970),375;Saito,Microb,Toxins,7,(1971),293;Blight,J.Chem.Soc.Perkin Trans.,1,(1974),1691;Ishii,Phytochem.,14,(1975),2469	0	0
Metabolite_4263	398.12	398.121	4.20318	C00036920	Cnidioside B	C18H22O10	Leptothyrsa sprucei	Li,Phytochem.,58,(2001),627	Leptothyrsa	Rutaceae
Metabolite_7176	622.239	622.241	3.67785	C00039512	Kadangustin C	C34H38O11	Kadsura angustifolia	Gao,J.Nat.Prod.,71,(2008),558	Kadsura	Schisandraceae
Metabolite_7472	637.367	637.361	-9.18778	C00049352	7,2'-Bisdeacetoxyaustropicatine;(+)-7,2'-Bisdeacetoxyaustropicatine	C37H51NO8	Taxus chinensis	Chen,J.Nat.Prod.,62,(1999),149	Taxus	Taxaceae
Metabolite_4807	445.179	445.175	-8.5793	C00028284	Fumiquinazoline A	C24H23N5O4	Aspergillus fumigatus	Takahashi,J.Chem.Soc.Perkin Trans.,1,(1995),2345	Aspergillus	Trichocomaceae
Metabolite_8331	720.205	720.211	8.13246	C00027235	Sanguidimerine;(+)-Sanguidimerine;(R*,R*)-(+)-Sanguidimerine	C43H32N2O9	Bocconia arborea	Delgardo,Rev.Soc.Quim.Mex.,45,(2001),189	Bocconia	Papaveraceae
Metabolite_6798	602.177	602.179	2.80358	C00032884	Dahuribirin C;(+)-Dahuribirin C	C33H30O11	Angelica dahurica BENTH et HOOK.var.dahurica BENTH.et HOOK.	Wang,Chem.Pharm.Bull.,49,(2001),1085	Angelica	Apiaceae
Metabolite_4304	401.273	401.272	-2.1402	C00023603	Tubingensin A	C28H35NO	Aspergillus niger	TePaske,J.Org.Chem.,54,(1989),4743-4746	Aspergillus	Trichocomaceae
Metabolite_1167	178.048	178.048	-2.72677	C00007388	L-Galactono-1,4-lactone	C6H10O6	Arabidopsis thaliana	Conklin,Plant Cell Env.,24,(2001),383;Sminoff,Crit.Rev.Biochem.Mol.Biol.,35,(2000),291	Arabidopsis	Cruciferae
Metabolite_4340	404.274	404.272	-5.1776	C00042632	Isoiguesterin	C28H36O2	Salacia madagascariensis	Thiem,J.Nat.Prod.,68,(2005),251	Salacia	Celastraceae
Metabolite_6273	566.445	566.449	6.25462	C00022846	3',4'-Didehydro-1',2'-dihydro-1'-methoxy-beta,psi-carotene	C41H58O	Rhodomicrobium vannielii	Britton,Phytochem.,14,(1975),2427	Rhodomicrobium	Hyphomicrobiaceae
Metabolite_6762	598.433	598.439	9.14408	C00031397	Sugikurojin B;(+)-Sugikurojin B	C41H58O3	Cryptomeria japonica D.DON.	Yoshikawa,Chem.Pharm.Bull.,54,(2006),315	Cryptomeria	Taxodiaceae
Metabolite_4341	404.347	404.344	-7.7215	C00023135	4,4'-Diapo-7,8,11,12-tetrahydrolycopene	C30H44	Streptococcus faecium UNH 564P	Taylor,Biochem. J.,139,(1974),761	Streptococcus	Streptococcaceae
Metabolite_9599	1078.55	1078.56	2.28593	C00029901	Capilliposide A	C52H86O23	Lysimachia capillipes	Tian,Chem.Pharm.Bull.,54,(2006),567	Lysimachia	Myrsinaceae
Metabolite_4329	404.023	404.027	9.7776	C00026966	Bromodeoxytopsentin	C20H13BrN4O	Spongosorites genitrix	Shin,J.Nat.Prod.,62,(1999),647	Spongosorites	Halichondriidae
Metabolite_7737	654.302	654.304	3.19235	C00048011	Moluccensin B	C36H46O11	Xylocarpus moluccensis	Li,J.Nat.Prod.,72,(2009),1657	Xylocarpus	Meliaceae
Metabolite_1789	210.164	210.162	-7.82064	C00029668	alpha-Cyclogeraniol acetate	C13H22O2	Houttuynia cordata	Lu,Chem.Pharm.Bull.,54,(2006),936	Houttuynia	Saururaceae
Metabolite_4774	444.114	444.116	5.32614	C00026823	Kottamide B	C21H25BrN4O2	Pycnoclavella kottae	Appleton,J.Org.Chem.,67,(2002),5402	Pycnoclavella	Clavelinidae
Metabolite_6225	564.196	564.2	5.89099	C00039540	Kadsuphilol B	C31H32O10	Kadsura philippinensis	Shen,J.Nat.Prod.,70,(2007),1139	Kadsura	Schisandraceae
Metabolite_6240	564.305	564.31	9.42323	C00025777	Bonafousine	C35H40N4O3	Bonafousia tetrastachya	Danak,Bull.Soc.Chim.Fr.,(1980),490	Bonafousia	Apocynaceae
Metabolite_4324	403.138	403.14	4.85279	C00026156	18-hydroxyjaconine	C18H26ClNO7	Senecio selloi	Liddell,Nat.Prod.Rep.,15,(1998),363	Senecio	Asteraceae
Metabolite_4325	403.126	403.126	0.151408	C00007600	Isopentyenyladenine riboside monophoshate	C14H22N5O7P	Arabidopsis thaliana	Kasahara,J.Biol.Chem.,279,(2004),14049	Arabidopsis	Cruciferae
Metabolite_39	85.0526	85.0528	1.64962	C00007666	3-Hydroxybutyl nitrile	C4H7NO	Arabidopsis thaliana	Lambrix,Plant Cell,13,(2001),2793	Arabidopsis	Cruciferae
Metabolite_6387	578.258	578.263	8.11509	C00001712	Deserpidine	C32H38N2O8	Tonduza longifolia	Neuss,J.Am.Chem.Soc.,77,(1955),4087	0	0
Metabolite_4658	435.089	435.093	9.2231	C00006696	Delphinidin 3-arabinoside	C20H19O11	Acrotriche serrulata	Harborne, The Handbook of Natural Flavonoids, 2, (1999), 1,Anthocyanins;Francis,J.Food Sci.,31,(1966),583;Jarman,Phytochem.,10,(1971),2235	Acrotriche	Ericaceae
Metabolite_4583	429.178	429.179	1.69784	C00027479	Romucosine G	C23H27NO7	Annona purpurea	Chang,J.Nat.Prod.,63,(2000),746	Annona	Annonaceae
Metabolite_7201	622.359	622.362	4.94635	C00015185	Trienomycin G	C36H50N2O7	Streptomyces sp. 91614	Kim,J.Antibiotics 55,(2002),204	Streptomyces	Streptomycetaceae
Metabolite_7599	643.334	643.336	2.36773	C00029176	Vanilloylzygadenine;3-Vanilloylzygadenine	C35H49NO10	Veratrum oblongum Loes.f.	Kadota,Phytochem.,38,(1995),777	Veratrum	Melanthiaceae
Metabolite_7589	642.338	642.34	3.5406	C00049027	Wikstroelide A;(+)-Wikstroelide A	C36H50O10	Wikstroemia retusa	Abe,Phytochem.,47,(1998),833	Wikstroemia	Thymelaeaceae
Metabolite_1333	187.063	187.063	1.63041	C00000111	Indole-3-acrylic acid	C11H9NO2	Lens culinaris	Hofinger,Phytochem.,19,(1970),1757;Hofinger,Phytochem.,14,(1975),475	Lens	Fabaceae
Metabolite_6526	590.357	590.362	8.05132	C00028797	Panganensine X	C38H46N4O2	Strychnos panganensis	Nuzillard,Phytochem.,43,(1996),897	Strychnos	Longaniaceae
Metabolite_6523	590.255	590.257	3.44342	C00010656	Serrulatoside	C27H42O14	Penstemon serrulatus	Junior,Planta Med.,50,(1984),417	Penstemon	Plantaginaceae
Metabolite_1367	188.129	188.127	-9.5561	C00001364	L-Homoarginine	C7H16N4O2	Lathyrus cicera	Harborne,Phytochemical Dictionary Second Edition,Taylor and Francis,(1999),Chapter10	Lathyrus	Fabaceae
Metabolite_4670	436.158	436.158	-0.566738	C00010745	Alpigenoside	C18H28O12	Lonicera alpigena	Bailleul,J.Nat.Prod.,44,(1981),573	Lonicera	Caprifoliaceae/Diervillaceae/Dipsacaceae/Linnaeaceae/Valerianaceae
Metabolite_7608	644.404	644.401	-3.9449	C00016175	Plactin A	C32H52N8O6	Fungal strain F165	Inoue,J.Antibiotics 49,(1996),45	0	0
Metabolite_6491	586.274	586.278	6.60781	C00036749	Ardisiaquinone H	C32H42O10	Ardisia teysmanniana Scheff.	Yang,Phytochem.,58,(2001),1235	Ardisia	Myrsinaceae
Metabolite_9423	1004.51	1004.52	8.34834	C00029709	Aquilegioside E	C49H80O21	Aquilegia vulgaris L	Nishida,Chem.Pharm.Bull.,51,(2003),683;Nishida,Chem.Pharm.Bull.,51,(2003),956	Aquilegia	Ranunculaceae
Metabolite_6481	584.317	584.315	-3.07539	C00001702	Caracurine V	C38H40N4O2	Strychnos toxifera	Zlotos,J.Nat.Prod.,66,(2003),119	Strychnos	Longaniaceae
Metabolite_778	150.044	150.043	-9.30465	C00017789	SQ 30957	C7H6N2O2	Penicillium funiculosum ATCC 20783	Singh,J.Antibiotics,39,(1986),1054	Penicillium	Trichocomaceae
Metabolite_6478	584.28	584.283	5.73921	C00003633	Ouabain	C29H44O12	Acokanthera ouabaio	Harborne,Phytochemical Dictionary Second Edition,Taylor and Francis,(1999),Chapter55	Acokanthera	Apocynaceae
Metabolite_6659	594.381	594.377	-6.79741	C00017220	Aldecalmycin	C33H54O9	Streptomyces	Sawa,J.Antibiotics 45,(1992),136	Streptomyces	Streptomycetaceae
Metabolite_9427	1006.13	1006.12	-8.72028	C00048812	Phenazine A	C47H30N2O24	Halichondria panicea	Blunt,Nat.Prod.Rep.,27,(2010),165	Halichondria	Halichondriidae
Metabolite_1407	190.174	190.172	-7.21897	C00011917	Senedigitalene	C14H22	Senecio digitalifolius	Bohlmann,Phytochem.,17,(1978),759	Senecio	Asteraceae
Metabolite_9429	1006.39	1006.38	-7.13359	C00031170	Rhyncoside E	C52H62O20	Bruguiera sexangula var.rhynchopetala	Bao,CHem.Pharm.Bull.,55,(2007),1175	Bruguiera	Rhizophoraceae
Metabolite_1323	186.052	186.053	3.76174	C00017968	Antibiotic C 2554A-II;Antibiotic XB 94F2;Pentenomycin II	C8H10O5	Streptomyces eurythermus MCRL 0738	Umino,J.Antibiotics,26,(1973),506	Streptomyces	Streptomycetaceae
Metabolite_4653	434.304	434.303	-0.918936	C00041893	Stereonsteroid I;(-)-Stereonsteroid I	C26H42O5	Stereonephthya crystalliana Kukenthal	Wang,J.Nat.Prod.,69,(2006),103	0	0
Metabolite_4626	432.156	432.157	3.62125	C00013499	Artocommunol CA;(+)-6-Hydroxy-11-methoxy-3,3-dimethyl-8-(2-methyl-1-propenyl)-3H,7H,8H-bis[1]benzopyrano[4,3-b:6',5'-e]pyran-7-one	C26H24O6	Artocarpus communis	Chan,J.Nat.Prod.,66,(2003),427	Artocarpus	Moraceae
Metabolite_1286	184.039	184.037	-8.4232	C00030754	Methyl 3,4,5-trihydroxybenzoate;Methyl gallate	C8H8O5	Spatoglossum variabile	Hayat,Chem.Pharm.Bull.,50,(2002),1297	Spatoglossum	Dictyotaceae
Metabolite_7571	641.334	641.333	-0.998185	C00016883	Leustroducsin A	C32H52NO10P	Streptomyces platensis SANK 60191	Kohama,J.Antibiotics 46,(1993),1503	Streptomyces	Streptomycetaceae
Metabolite_5334	484.121	484.122	1.37839	C00009020	Leucodelphinidin 3-glucoside	C21H24O13	Diospyros kaki	Harborne, The Handbook of Natural Flavonoids, 2, (1999), 355,Flavans and proanthocyanidins;Ito,Agric.Biol.Chem.,26,(1962),156;Nakayama,Nature,199,(1963),72	Diospyros	Ebenaceae
Metabolite_7563	640.356	640.361	7.6671	C00030602	Karaviloside IV;(+)-Karaviloside IV	C37H52O9	Momordica charantia L.	Nakamura,Chem.Pharm.Bull.,54,(2006),1545	Momordica	Cucurbitaceae
Metabolite_5346	484.24	484.238	-3.43948	C00018690	Kanamycin C	C18H36N4O11	Streptomyces kanamyceticus	Murase,J. Antibiotics Series A,14,(1961),156	Streptomyces	Streptomycetaceae
Metabolite_4650	434.15	434.15	-0.0166836	C00015495	Melleolide K	C23H27ClO6	Armillariella mellea (Vahl. ex Fr.) Karst	Momose,J.Antibiotics 53,(2000),137	Armillariella	Marasmiaceae
Metabolite_3179	303.049	303.05	5.12838	C00006616	6-Hydroxycyanidin	C15H11O7	Alstroemeria spp.	Harborne, The Handbook of Natural Flavonoids, 2, (1999), 1,Anthocyanins;Saito,Phytochm.,24,(1985),2125	Alstroemeria	Alstroemeriaceae
Metabolite_6559	592.371	592.376	8.72054	C00030740	Marianoside B;(-)-Marianoside B	C37H52O6	Silybum marianum GAERTH	Ahmed,Chem.Pharm.Bull.,54,(2006),103	Silybum	Asteraceae
Metabolite_6556	592.354	592.355	2.2562	C00023056	7,7',8,8'-Tetradehydroastaxanthin;(3S,3'S)-7,7',8,8'-Tetradehydro-3,3'-dihydroxy-beta,beta-carotene-4,4'-dione	C40H48O4	Asterias rubens	Shone,Comp. Biochem. Physiol.,62B,(1979),507	Asterias	Flacourtiaceae
Metabolite_6569	593.302	593.3	-3.06553	C00002002	Integerrine	C35H39N5O4	Ceanothus integerrimus	Harborne,Phytochemical Dictionary Second Edition,Taylor and Francis,(1999),Chapter24	Ceanothus	Rhamnaceae
Metabolite_7654	650.356	650.351	-7.33006	C00041701	Nicandrose E;(+)-Nicandrose E	C31H54O14	Physalis nicandroides var.attenuata	Maldonado,J.Nat.Prod.,69,(2006),1511	Physalis	Solanaceae
Metabolite_8367	724.315	724.309	-6.94721	C00034898	Swietephragmin B	C39H48O13	Swietenia mahogani	Abdelgaleil,Phytochem.,67,(2006),452	Swietenia	Meliaceae
Metabolite_6407	581.184	581.19	9.26942	C00016260	Amidepsine E	C30H31NO11	Humicola sp. FO-5969	Tomoda,J.Antibiotics 49,(1996),929	0	0
Metabolite_4471	420.117	420.116	-0.918213	C00044738	Eiseniaiodide B	C18H29IO3	Eisenia bicyclis	Kousaka,J.Nat.Prod.,66,(2003),1318	Eisenia	Lessoniaceae
Metabolite_1497	195.162	195.162	0.977398	C00028002	Calyxamine A	C12H21NO	Calyx podatypa	Rodriguez,J.Nat.Prod.,60<(1997),1331	0	0
Metabolite_31	84.0217	84.0211	-7.07175	C00015490	Penitricin D	C4H4O2	Aspergillus niger	Alvi,J. Antibiotics,53,(2000),110	Aspergillus	Trichocomaceae
Metabolite_7516	638.352	638.357	6.72514	C00018472	(+)-Mycotrienin II;Ansatrienin B;Antibiotic T 23II;Mycotrienin II;SDZ 115-962	C36H50N2O8	Streptomyces rishiriensis	Sugita,J. Antibiotics,35,(1982),1460	Streptomyces	Streptomycetaceae
Metabolite_4716	440.074	440.074	0.279919	C00009323	6a,12b-Dihydro-3,10,11,12-tetrahydroxy-6-(3,4,5-trihydroxyphenyl)-[2]benzopyrano[3,4-c]benzopyran-8(6H)-one	C22H16O10	Burkea africana	Harborne, The Handbook of Natural Flavonoids, 2, (1999), 355,Flavans and proanthocyanidins;Bam,Phytochem.,29,(1990),283	Burkea	Fabaceae
Metabolite_1232	181.073	181.074	2.59384	C00001397	L-Tyrosine	C9H11NO3	Arabidopsis thaliana	Lange,Plant Mol.Biol.,51,(2003),925	Arabidopsis	Cruciferae
Metabolite_4719	440.114	440.114	0.407958	C00000277	Hallactone B	C20H24O9S	Podocarpus hallii	Kupchan,Experientia,31,(1978),137	Podocarpus	Podocarpaceae
Metabolite_9362	992.492	992.497	4.9459	C00045343	Micropeptin EI 992;(-)-Micropeptin EI 992	C48H68N10O13	Microcystis aeruginosa	Ploutno,J.Nat.Prod.,65,(2002),973	0	0
Metabolite_3131	300.193	300.194	1.83367	C00021654	7-Hydroxy-10-methoxydeacetyldihydrobotrydial	C16H28O5	Geniculosporium sp.	Krohn,J. Nat. Prod.,68,(2005),400	0	0
Metabolite_790	151.051	151.049	-8.69735	C00001501	Guanine	C5H5N5O	0	Harborne,Phytochemical Dictionary Second Edition,Taylor and Francis,(1999),Chapter14	0	0
Metabolite_7650	650.284	650.287	4.44311	C00016608	Chondramide D	C35H43ClN4O6	Chondromyces crocatus Cm c2	Kunze,J.Antibiotics 48,(1995),1262	Chondromyces	Polyangiaceae
Metabolite_1445	192.151	192.151	0.47729	C00021957	2,2,6,7-Tetramethylbicyclo[4.3.0]nona-1(9),4-dien-8-ol	C13H20O	Cydonia oblonga	Ishihara,J. Org. Chem.,51,(1986),491	Cydonia	Rosaceae
Metabolite_3238	308.079	308.08	1.56887	C00039763	Methylisatoid	C17H12N2O4	Phaius mishmensis	Jao,J.Nat.Prod.,71,(2008),1275	Phaius	Orchidaceae
Metabolite_7615	646.315	646.314	-0.990973	C00035955	6alpha-Acetoxy-9beta-benzoyloxy-1beta-cinnamoyloxy-8beta-(2-methylbutanoyloxy)-beta-dihydroagarofuran	C38H46O9	Celastrus orbiculatus	Guo,Chem.Pharm.Bull.,52,(2004),1134	Celastrus	Celastraceae
Metabolite_269	112.028	112.027	-6.66053	C00001513	Uracil	C4H4N2O2	Ficus septica	Lansky,J.Ethnopharmacol.,119,(2008),195	Ficus	Moraceae
Metabolite_8435	740.325	740.326	0.421527	C00033987	Ixerisoside L	C36H52O16	Ixeris repens A.Gray	Zidorn,Phytochem.,69,(2008),2270	Ixeris	Asteraceae
Metabolite_6455	583.317	583.315	-3.78205	C00041163	Taxine B	C33H45NO8	Taxus yunnanensis	Baloglu,J.Nat.Prod.,62,(1999),1448	Taxus	Taxaceae
Metabolite_8437	741.186	741.188	2.96157	C00006908	Malonylmalvin	C32H37O20	Lavatera maritima	Harborne, The Handbook of Natural Flavonoids, 2, (1999), 1,Anthocyanins;Takeda,Phytochem.,28,(1989),499;Harborne,Biochem.Syst.Ecol.,22,(1994),835	Lavatera	Malvaceae
Metabolite_4498	422.285	422.282	-6.69806	C00042072	20-epi-Isoiguesterinol	C28H38O3	Salacia madagascariensis	Thiem,J.Nat.Prod.,68,(2005),251	Salacia	Celastraceae
Metabolite_9846	1158.59	1158.58	-8.8209	C00030961	Perennisaponin A	C57H90O24	Bellis perennis	Yoshikawa,Chem.Pharm.Bull.,56,(2008),559	Bellis	Asteraceae
Metabolite_4504	422.353	422.355	4.59931	C00023788	Glochidone	C30H46O	Glochidion hohenackeri	Hui,Phytochem.,17,(1978),156	Glochidion	Phyllanthaceae
Metabolite_7631	648.34	648.341	2.0714	C00015625	11-[1-[(Cyclohexylcarbonyl)amino]cyclopropanecarboxylate] ansatrienol A;UCF 116A;UCF 116A3	C37H48N2O8	Streptomyces sp.	Hara,J.Antibiotics 53,(2000),720	Streptomyces	Streptomycetaceae
Metabolite_7531	639.277	639.271	-8.56362	C00017696	Ashimycin B	C23H41N7O14	Streptomyces griseus FT3-4	Tohma,J.Antibiotics,42,(1989),1205	Streptomyces	Streptomycetaceae
Metabolite_5421	489.212	489.214	4.41994	C00018575	Antibiotic OA 6129E	C21H35N3O8S	Streptomyces sp. OA-6129	Yoshioka,J. Antibiotics,37,(1984),211	Streptomyces	Streptomycetaceae
Metabolite_3383	318.194	318.194	0.0602236	C00028365	Huperzine G	C18H26N2O3	Huperzia serrata	Wang,Zhiwu Xuebao,40,(1998),842	Huperzia	Lycopodiaceae
Metabolite_9072	942.45	942.446	-3.79743	C00032226	Sublanceoside D2;(-)-Sublanceoside D2	C46H70O20	Cynanchum sublanceolatum	Warashina,Chem.Pharm.Bull.,54,(2006),1551	Cynanchum	Apocynaceae
Metabolite_4946	457.184	457.185	2.57378	C00018686	Klinomycin;Minocin;Minocycline chloride;Minocycline hydrochloride;NSC 141993;Periocline;Vectrin	C23H27N3O7	Streptomyces I-523	Nishimura,J. Antibiotics Series A,13,(1960),327	Streptomyces	Streptomycetaceae
Metabolite_8297	713.544	713.544	-0.0568258	C00032175	Soyacerebroside I;(+)-Soyacerebroside I	C40H75NO9	Dimocarpus fumatus	Voutquenne,Phytochem.,50,(1999),63	Dimocarpus	Sapindaceae
Metabolite_4083	380.234	380.235	3.21206	C00022696	5-Methyl-4-hydroxy-3-farnesylcoumarin	C25H32O3	Mutisia spinosa	Zdero,Phytochem.,25,(1986),1986	Mutisia	Asteraceae
Metabolite_1082	172.04	172.04	1.84309	C00018231	Clazamycin A	C7H9ClN2O	Streptomyces No. MF990-BF4	Horiuchi,J. Antibiotics,32,(1979),762	Streptomyces	Streptomycetaceae
Metabolite_5474	494.129	494.126	-5.11914	C00038173	16-Oxonapyradiomycin A2	C25H28Cl2O6	Streptomyces antimycoticus	Motohashi,J.Nat.Prod.,71,(2008),595	Streptomyces	Streptomycetaceae
Metabolite_4071	379.192	379.19	-6.67703	C00011298	Fumitremorgin C	C22H25N3O3	Aspergillus fumigatus	Cole,Handbook of Secondary Fungal Metabolites,Volume I,(2003);Cole,Handbook of Toxic Fungal Metabolites,(1981),364;Cole,Ann.Nutr.Alim.,31,(1977),685	Aspergillus	Trichocomaceae
Metabolite_7891	667.385	667.379	-8.96132	C00015125	HC 70IA;Pyloricidin A1	C32H53N5O10	Bacillus sp. HC-70	Nakao,J.Antibiotics 54,(2001),926	Bacillus	Bacillaceae
Metabolite_4062	378.093	378.095	5.18025	C00030750	Methoxymatteucin	C18H18O9	Dryopteris crassirhizoma	Lee,Chem.Pharm.Bull.,56,(2008),711	Dryopteris	Dryopteridaceae
Metabolite_4908	454.078	454.082	9.0449	C00038752	Chlorocyclinone A	C24H19ClO7	Streptomyces sp.DSM17045	Potterat,J.Nat.Prod.,70,(2007),1934	Streptomyces	Streptomycetaceae
Metabolite_6905	608.361	608.356	-8.17887	C00023195	3alpha-Angeloyloxy-2beta,15,16-trihydroxy-ent-labda-7,13E-dien-2-O-beta-[fucopyranoside-4'-O-acetate]	C33H52O10	Baccharis pingraea	Zdero,Phytochem.,25,(1986),2841	Baccharis	Asteraceae
Metabolite_4945	457.18	457.179	-2.31765	C00038922	Dankastatin B	C23H33Cl2NO4	Gymnascella dankaliensis	Amagata,J.Nat.Prod.,71,(2008),340	Gymnascella	Gymnoascaceae
Metabolite_4070	379.123	379.12	-6.94243	C00027017	Maremycin C1	C17H21N3O5S	Streptomyces sp.(GT051237)	Tang,Eur.J.Org.Chem.,(2001),261	Streptomyces	Streptomycetaceae
Metabolite_5973	538.245	538.241	-6.33822	C00033967	Ixerin N;(-)-Ixerin N	C27H38O11	Ixeris debilis A. Gray	Zidorn,Phytochem.,69,(2008),2270	Ixeris	Asteraceae
Metabolite_3960	370.03	370.032	6.37342	C00031758	Eckstolonol	C18H10O9	Ecklonia stolonifera OKAMURA	Kang,Chem.Pharm.Bull.,51,(2003),1012	Ecklonia	Lessoniaceae
Metabolite_6914	608.435	608.441	9.80563	C00049706	Batzelladine H;(+)-Batzelladine H	C35H56N6O3	Batzella sp.	Snider,J.Nat.Prod.,62,(1999),1707	0	0
Metabolite_9087	945.303	945.306	2.43827	C00043386	Chiapenine ES-I	C48H51NO19	Maytenus chiapensis	Nunez,J.Nat.Prod.,67,(2004),14	Maytenus	Celastraceae
Metabolite_4887	451.147	451.148	2.2664	C00033692	Campyloside A	C21H25NO10	Campylospermum glaucum	Zintchem,Phytochem.,69,(2008),2209	Campylospermum	Ochnaceae
Metabolite_5501	496.224	496.221	-6.79568	C00016278	EI 1625-2	C27H32N2O7	Streptomyces sp. E-1625	Tanaka,J.Antibiotics 49,(1996),1073	Streptomyces	Streptomycetaceae
Metabolite_5468	493.174	493.174	0.290565	C00025117	Oxostephabenine;16-Oxostephabenine; N,O-Dimethyloxostephine benzoate	C27H27NO8	Stephania japonica Miers	Yamamura,J.Nat.Prod.,48,(1985),746	Stephania	Menispermaceae
Metabolite_6087	546.275	546.273	-4.09427	C00043380	Chaetoglobosin Q	C32H38N2O6	Chaetomium globosum CANUN60	Jiao,J.Nat.Prod.,67,(2004),1722	Chaetomium	Chaetomiaceae
Metabolite_6916	609.178	609.182	6.27372	C00006686	Peonidin 3-rutinoside	C28H33O15	Dracula chimaera	Fossen,Phytochem.,63,(2003),783	Dracula	Orchidaceae
Metabolite_7877	666.337	666.331	-9.48735	C00028343	Herveline C	C40H46N2O7	Hernandia voyronii	Rasoanivo,Tetrahedron,51,(1995),1221	Hernandia	Hernandiaceae
Metabolite_6915	609.158	609.161	4.09164	C00006861	Peonidin 3-(6''-p-coumarylglucoside)	C31H29O13	Vitis cinerea	Harborne, The Handbook of Natural Flavonoids, 2, (1999), 1,Anthocyanins;Wulf,Am.J.Evol.Vitic.,29,(1978),42;Fong,Phytochem.,13(1974),1001	Vitis	Vitaceae
Metabolite_6917	609.206	609.205	-2.23241	C00049549	Geodiamolide M	C28H40BrN3O7	Cymbastela sp.	Coleman,J.Nat.Prod.,62,(1999),1137	0	0
Metabolite_2048	227.225	227.225	-1.35986	C00045988	Halaminol A;(+)-Halaminol A	C14H29NO	Haliclona sp. 1031	Clark,J.Nat.Prod.,64,(2001),1568	0	0
Metabolite_5500	496.111	496.112	1.75631	C00018810	Kinamycin A	C24H20N2O10	Streptomyces murayamaensis sp. nov.	Nakagawa,J. Antibiotics 24,(1971),353	Streptomyces	Streptomycetaceae
Metabolite_4087	381.164	381.165	1.07554	C00007547	Zeatin 9-glucoside	C16H23N5O6	Arabidopsis thaliana	Werner,Physiologia Plantarum,118,(2003),127	Arabidopsis	Cruciferae
Metabolite_3984	372.164	372.164	1.00924	C00017766	Clavamycin F	C15H24N4O7	Streptomyces hygroscopicus NRRL 15846	King,J.Antibiotics,39,(1986),510	Streptomyces	Streptomycetaceae
Metabolite_7420	636.259	636.257	-2.92559	C00033911	Chloramultilide D;(-)-Chloramultilide D;Henriol B;(-)-Henriol B	C35H40O11	Chloranthus spicatus	Xu,J.Nat.Prod.,70,(2007),1987	Chloranthus	Chloranthaceae
Metabolite_6025	541.305	541.304	-1.42399	C00001614	Anopterine	C31H43NO7	Anopterus macleayanus F.Muell.	Denne,Tetrahedron Lett.,(1972),2727;Hart,Aust.J.Chem.,29,(1976),1319	Anopterus	Escalloniaceae
Metabolite_7914	669.346	669.351	8.47583	C00049519	Spicataxine;(+)-Spicataxine	C37H51NO10	Austrotaxus spicata	Baloglu,J.Nat.Prod.,62,(1999),1448	Austrotaxus	Taxaceae
Metabolite_7266	624.292	624.293	3.08201	C00041194	Taxuspine M	C35H44O10	Taxus cuspidata	Parmar,Phytochem.,50,(1999),1267	Taxus	Taxaceae
Metabolite_6886	608.314	608.32	8.77635	C00012076	2-Acetoxy-4,5-dihydroxykleinifulgin	C32H48O11	Kleinia fulgens	Bohlmann,Phytochem.,20,(1981),251	Kleinia	Asteraceae
Metabolite_8271	709.406	709.404	-2.53338	C00028296	Germbudine	C37H59NO12	Veratrum viride Ait.	Vejdelek,Chem.Listy,49,(1955),1538	Veratrum	Melanthiaceae
Metabolite_7148	620.362	620.356	-8.98785	C00031019	Physagulin D	C34H52O10	Physalis angulata L.	Abe,Chem.Pharm.Bull.,54,(2006),1226	Physalis	Solanaceae
Metabolite_2956	289.08	289.081	1.07718	C00033618	Aglatenin	C12H19NO3S2	Aglaia tenuicaulis	Greger,Phytochem.,69,(2008),928	Aglaia	Meliaceae
Metabolite_1070	171.088	171.09	7.71374	C00002083	Crotanecine	C8H13NO3	Crotalaria spp.	Harborne,Phytochemical Dictionary Second Edition,Taylor and Francis,(1999),Chapter26	Crotalaria	Fabaceae
Metabolite_3997	372.251	372.251	1.25005	C00022459	14-Hydroxy-12,13-dihydrosesquiterpineol-14-O-xylopyranoside	C20H36O6	Conyza aegyptica	Zdero,Phytochem.,29,(1990),3167	Conyza	Asteraceae
Metabolite_7933	670.338	670.335	-4.64112	C00031515	15-O-Deacetyl-15-O-methylnimbolidin B	C37H50O11	Melia azedarach	Zhou,Chem.Pharm.Bull.,53,(2005),1362	Melia	Meliaceae
Metabolite_2154	236.072	236.072	-2.45348	C00007644	2-(4'-Methylthio)butylmalic acid	C9H16O5S	Arabidopsis thaliana	Textor,Planta,218,(2004),1026	Arabidopsis	Cruciferae
Metabolite_7929	670.33	670.325	-6.87291	C00027562	Malekulatine;(+)-Malekulatine	C39H46N2O8	Hernandia sonora	Chen,Phytochem.,40,(1995),983	Hernandia	Hernandiaceae
Metabolite_7143	620.349	620.346	-5.2739	C00017668	Trienomycin D	C36H48N2O7	Streptomyces sp. No.82-85	Nomoto,J.Antibiotics,42,(1989),479	Streptomyces	Streptomycetaceae
Metabolite_4001	373.049	373.05	2.4102	C00007586	Gluconapin;3-Butyl glucosinolate	C11H19NO9S2	Sterigmostemum incanum	Daxenbichler,Phytochem.,30,(1991),2623	Sterigmostemum	Cruciferae
Metabolite_7271	624.321	624.32	-2.38082	C00001845	Dauricine	C38H44N2O6	Menispermum canadense	Harborne,Phytochemical Dictionary Second Edition,Taylor and Francis,(1999),Chapter21	Menispermum	Menispermaceae
Metabolite_2120	233.07	233.069	-6.93229	C00002146	Casimiroin	C12H11NO4	Casimiroa edulis	Harborne,Phytochemical Dictionary Second Edition,Taylor and Francis,(1999),Chapter27	Casimiroa	Rutaceae
Metabolite_5479	494.363	494.361	-4.01371	C00007528	28-Homobrassinolide	C29H50O6	Arabidopsis thaliana	Fujioka,Annu.Rev.Plant Biol.,54,(2003),137	Arabidopsis	Cruciferae
Metabolite_8529	768.122	768.117	-5.63743	C00013869	Quercetin 3-(2'',6''-digalloylgalactoside);3-[[2,6-Bis-O-(3,4,5-trihydroxybenzoyl)-beta-D-galactopyranosyl]oxy]-2-(3,4-dihydroxyphenyl)-5,7-dihydroxy-4H-1-benzopyran-4-one	C35H28O20	Acer okamotanum	Kim,J.Nat.Prod.,61,(1998),145	Acer	Sapindaceae
Metabolite_388	126.067	126.068	5.20366	C00000336	1-Cyclohexenylcarboxylic acid	C7H10O2	Streptomyces collinus	Moore,J. Am. Chem. Soc.,115,(1993),5254	Streptomyces	Streptomycetaceae
Metabolite_7147	620.369	620.371	4.32075	C00047240	Garcimultiflorone C;(-)-Garcimultiflorone C	C38H52O7	Garcinia multiflora	Chen,J.Nat.Prod.,72,(2009),253	Garcinia	Clusiaceae/Clusiaceae-Guttiferae
Metabolite_6881	608.274	608.273	-1.05653	C00001763	Reserpine	C33H40N2O9	Rauwolfia serpentina Benth ex Kurz.	Stoll,Helv.Chim.Acta,38,(1955),270;Siddiqui,Planta Med.,53,(1987),288	Rauwolfia	Apocynaceae
Metabolite_6035	542.254	542.252	-4.68553	C00024104	Swietenin B	C30H38O9	Swietenia mahagoni JACQ.	Kadota S.,Chem.Pharm.Bull.,38,(1990),639-651	Swietenia	Meliaceae
Metabolite_2107	232.124	232.123	-3.08424	C00010399	6-Chloromethyl-3,8-dimethoxy-2-methyl-1,6-octadiene	C12H21ClO2	Chondrococcus hornemannii	Coll,Aust.J.Chem.,42,(1989),1983	Chondrococcus	Rubiaceae
Metabolite_2176	236.118	236.12	8.01111	C00036024	9-Methoxy-1,7-dimethylphenanthrene	C17H16O	Neoboutonia glabrescens Prain	Tchinda,Phytochem.,64,(2003),575	Neoboutonia	Euphorbiaceae
Metabolite_4035	375.208	375.205	-8.66329	C00024412	Narcimarkine	C21H29NO5	Narcissus poeticus	Dopke,Z.Chem.,21,(1981),71	Narcissus	Amaryllidaceae
Metabolite_7865	665.353	665.358	6.90771	C00001993	Amphibine B	C39H47N5O5	Ziziphus amphibia	Harborne,Phytochemical Dictionary Second Edition,Taylor and Francis,(1999),Chapter24	Ziziphus	Rhamnaceae
Metabolite_1908	220.086	220.085	-7.41207	C00001371	5-Hydroxy-L-tryptophan	C11H12N2O3	Griffonia simplicifolia	Harborne,Phytochemical Dictionary Second Edition,Taylor and Francis,(1999),Chapter10	Griffonia	Fabaceae
Metabolite_4215	392.231	392.231	0.506331	C00014989	Cyrmenin B1	C21H32N2O5	Cystobacter armeniaca Cb a24	Sesse,J.Antibiotics 56,(2003),827	Cystobacter	Cystobacteraceae
Metabolite_5270	478.118	478.114	-8.21251	C00032106	Paederosidic acid methyl ester	C19H26O12S	Paederia scandens	Kim,Chem.Pharm.Bull.,52,(2004),1356	Paederia	Rubiaceae
Metabolite_6136	553.201	553.206	9.41071	C00018160	Saframycin D	C28H31N3O9	Streptomyces lavendulae No. 314	Arai,J. Antibiotics,30,(1977),1015	Streptomyces	Streptomycetaceae
Metabolite_7821	658.326	658.32	-8.76054	C00038394	Ajugaside A;(+)-Ajugaside A	C32H50O14	Clerodendrum bungei Steud	Liu,J.Nat.Prod.,71,(2008),755	Clerodendrum	Labiatae
Metabolite_7795	656.548	656.553	7.6277	C00045493	(3S,14S)-Petrocortyne B	C46H72O2	Petrosia sp.	Lim,J.Nat.Prod.,64,(2001),46	0	0
Metabolite_8958	898.199	898.196	-3.20631	C00009100	Catechin-(4alpha->8)-gallocatechin-(4alpha->8)-gallocatechin	C45H38O20	Croton lechleri	Harborne, The Handbook of Natural Flavonoids, 2, (1999), 355,Flavans and proanthocyanidins;Cai,Phytochem.,30,(1991),2033;Tits,J.Pharm.Biomed.Anal.,10,(1992),1097	Croton	Euphorbiaceae
Metabolite_7782	656.28	656.283	5.26194	C00041155	Taxchinin D	C35H44O12	Taxus chinensis	Parmar,Phytochem.,50,(1999),1267	Taxus	Taxaceae
Metabolite_7791	656.358	656.356	-3.31477	C00039077	Dysoxylin D	C37H52O10	Dysoxylum gaudichaudianum	Chen,J.Nat.Prod.,70,(2007),312	Dysoxylum	Meliaceae
Metabolite_718	146.111	146.11	-9.39775	C00000246	Viridiene;(3R,4S)-cis-3-(1Z,3-Butadienry)-4-vinylcyclopentene	C11H14	Syringoderma phinneyi	Mueller,Naturwissenschaften,69,(1982),501	Syringoderma	Syringodermataceae
Metabolite_7793	656.383	656.377	-9.51632	C00046881	Russelioside A;(-)-Russelioside A	C34H56O12	Caralluma russeliana	Al-Yahya,J.Nat.Prod.,63,(2000),1451	Caralluma	Apocynaceae
Metabolite_2262	242.068	242.069	4.20811	C00026659	Begonanline	C13H10N2O3	Begonia nantoensis	Wu,Chem.Pharm.Bull.,52,(2004),345	Begonia	Begoniaceae
Metabolite_5204	473.207	473.206	-2.36506	C00016808	Fiscalin A	C26H27N5O4	Neosartorya fischeri	Wong,J.Antibiotics 46,(1993),545	Neosartorya	Trichocomaceae
Metabolite_4841	448.066	448.064	-3.90027	C00050092	Eschweilenol C	C20H16O12	Eschweilera coriacea	Yang,J.Nat.Prod.,61,(1998),901	Eschweilera	Lecythidaceae
Metabolite_87	98.0369	98.0368	-1.46998	C00029456	2-Furanmethanol;alpha-Furylcarbinol	C5H6O2	Brassica hirta	Miyazawa,J.Nat.Med.,60,(2006),89	Brassica	Cruciferae
Metabolite_4213	392.116	392.118	5.40486	C00044626	Chiriquitoxin;(-)-Chiriquitoxin	C13H20N4O10	Atelopus chiriquiensis	Daly,J.Nat.Prod.,67,(2004),1211	Atelopus	Bufonidae
Metabolite_6149	554.295	554.295	-0.260833	C00015127	HC 70II;Pyloricidin B	C26H42N4O9	Bacillus sp. HC-70	Nakao,J.Antibiotics 54,(2001),926	Bacillus	Bacillaceae
Metabolite_1040	169.111	169.11	-4.40433	C00025550	3alpha-Acetoxynortropane;Nortropine acetate; O-Acetylnortropine	C9H15NO2	Datura wrightii Regel	Parr,Phytochem.,29,(1990),2545	Datura	Solanaceae
Metabolite_1930	222.019	222.02	2.61979	C00026843	Batzelline D	C10H7ClN2O2	Zyzzya fuliginosa	Chang,J.Nat.Prod.,65,(2002),776	0	0
Metabolite_8556	772.234	772.236	2.3894	C00017949	O-Demethylpaulomycin A	C33H44N2O17S	Streptomyces paulus strain No.273	Argoudelis,J.Antibiotics,41,(1988),1316	Streptomyces	Streptomycetaceae
Metabolite_1105	174.032	174.032	-1.31867	C00000144	5-Hydroxy-1,4-naphthoquinone;juglone	C10H6O3	Juglans nigra	Davis,Am. J. Bot.,15,(1928),620;Bode,Planta,5,(1958),440	Juglans	Juglandaceae
Metabolite_4210	392.086	392.09	8.87378	C00005035	8-C-p-Hydroxybenzylkaempferol	C22H16O7	Thymus hirtus	Harborne, The Handbook of Natural Flavonoids, 1, (1999), 181.Flavonols;Merghem,Phytochem.,38,(1995),637	Thymus	Labiatae
Metabolite_3018	292.059	292.058	-2.81043	C00038040	(-)-2,3-Dihydrocitromycetin	C14H12O7	Penicillium bilaii	Capon,J.Nat.Prod.,70,(2007),1746	Penicillium	Trichocomaceae
Metabolite_1101	174.015	174.016	7.55318	C00001177	cis-Aconitic acid	C6H6O6	Aconitum napellus	Harborne,Phytochemical Dictionary Second Edition,Taylor and Francis,(1999),Chapter5	Aconitum	Ranunculaceae
Metabolite_4212	392.115	392.113	-4.61916	C00001883	Macarpine	C22H18NO6	Stylophorum diphyllum	Harborne,Phytochemical Dictionary Second Edition,Taylor and Francis,(1999),Chapter21	Stylophorum	Papaveraceae
Metabolite_3337	316.078	316.079	3.19085	C00035947	4-(beta-D-glucosyloxy)-3-hydroxy-benzoic acid;Protocatechuic acid 4-O-beta-glucoside	C13H16O9	Viscum articulactum	Leu,Chem.Pharm.Bull.,52,(2004),858	Viscum	Santalaceae
Metabolite_6172	556.255	556.252	-5.47738	C00050132	Jaspolinaloside	C27H40O12	Jasminum polyanthum	Tanahashi,J.Nat.Prod.,60,(1997),514	Jasminum	Oleaceae
Metabolite_4864	448.199	448.2	1.11216	C00037569	Obliquine;(-)-Obliquine	C26H28N2O5	Cyrtanthus obliquus	Brine,Phytochem.,61,(2002),443	Cyrtanthus	Amaryllidaceae
Metabolite_3942	366.278	366.277	-1.67591	C00023360	3beta-Acetoxy-8beta,15-dihydroxy-ent-labda-13E-ene	C22H38O4	Ophryosporus floribundus	Zdero,Phytochem.,29,(1990),3247	Ophryosporus	Asteraceae
Metabolite_6109	549.197	549.2	5.75027	C00016126	FE 35A	C30H31NO9	Streptomyces rochei 3218-GM2	Yamashita,J.Antibiotics 51,(1998),1105	Streptomyces	Streptomycetaceae
Metabolite_5259	477.213	477.215	4.01115	C00015960	(-)-SNF 4435C;SNF 4435C	C28H31NO6	Streptomyces spectabilis SNF4435	Kurosawa,J.Antibiotics 54,(2001),541	Streptomyces	Streptomycetaceae
Metabolite_5281	479.298	479.296	-5.6546	C00018341	Combimicin B2	C20H41N5O8	Micromonospora sp. K-6993	Oka,J. Antibiotics,34,(1981),777	Micromonospora	Micromonosporaceae
Metabolite_7799	657.198	657.191	-9.93607	C00049548	Geodiamolide L	C28H40IN3O7	Cymbastela sp.	Coleman,J.Nat.Prod.,62,(1999),1137	0	0
Metabolite_7976	674.29	674.288	-2.75139	C00034932	Bivismiaquinone	C42H42O8	Vismia baccifera	Hussein,J.Nat.Prod.,66,(2003),858	Vismia	Hypericaceae
Metabolite_5208	473.265	473.268	6.16661	C00026544	Phoebegrandine A	C29H35N3O3	Phoebe grandis	Mukhtar,Phytochem.,45,(1997),1543	Phoebe	Lauraceae
Metabolite_7848	661.28	661.273	-9.19904	C00018353	Antibiotic FA 1180B;Rubeomycin B	C33H43NO13	Actinomadura roseoviolacea var. biwakoensis nov. var.	Ogawa,J. Antibiotics,34,(1981),938	Actinomadura	Thermomonosporaceae
Metabolite_4869	448.349	448.345	-7.93921	C00028386	Ingamine A;(+)-Ingamine A	C30H44N2O	Xestospongia ingeus	Kong,Tetrahedron,50,(1994),6137	0	0
Metabolite_6845	606.335	606.34	9.1933	C00017650	Tautomycetin	C33H50O10	Streptomyces griseochromogenes RS-1223	Kobayashi,J.Antibiotics,42,(1989),141	Streptomyces	Streptomycetaceae
Metabolite_5201	472.269	472.273	6.71113	C00048667	Cortistatin A;(+)-Cortistatin A	C30H36N2O3	Corticium simplex	Blunt,Nat.Prod.Rep.,27,(2010),165	Corticium	Corticiaceae
Metabolite_9099	947.28	947.282	2.31123	C00006913	Negretein	C44H51O23	Brunfelsia calycina	Harborne, The Handbook of Natural Flavonoids, 2, (1999), 1,Anthocyanins;Lowry,Phytochem.,15,(1976),513;Schram,Z.Naturforsch.C.,38,(1983),342	Brunfelsia	Solanaceae
Metabolite_7858	664.103	664.105	3.85902	C00026933	11,11'-Dideoxyverticillin A;(+)-11,11'-Dideoxyverticillin A; 11,11'-Dideoxyverticillin; ZH 4B	C30H28N6O4S4	Penicillium sp.	Son,Nat.Prod.Lett.,13,(1999),213	Penicillium	Trichocomaceae
Metabolite_8937	886.381	886.383	3.29527	C00032419	Trillenoside B	C42H62O20	Trillium kamtschaticum PALL.	Ono,Chem.Pharm.Bull.,55,(2007),1093	Trillium	Trilliaceae
Metabolite_5503	496.273	496.273	-1.27051	C00043850	Prochaetoglobosin II	C32H36N2O3	Chaetomium globosum CANUN60	Jiao,J.Nat.Prod.,67,(2004),1722	Chaetomium	Chaetomiaceae
Metabolite_1888	219.113	219.112	-5.53815	C00000091	trans-Zeatin	C10H13N5O	Mercurialis ambigua	Dauphin,Planta,144,(1979),113	Mercurialis	Euphorbiaceae
Metabolite_7837	659.332	659.331	-2.82428	C00029255	Yunaconitine	C35H49NO11	Aconitum hemsleyanum PRITZ	Zhou,Chem.Pharm.Bull.,51,(2003),592	Aconitum	Ranunculaceae
Metabolite_3004	291.112	291.111	-4.64046	C00016714	Obscurolide A1	C15H17NO5	Streptomyces viridochromogenes Tu 2580	Hoff,J.Antibiotics 45,(1992),1096	Streptomyces	Streptomycetaceae
Metabolite_10077	1242.24	1242.23	-2.34953	C00049447	Dihydroxyfucotriphlorethol A tetradecaacetate	C58H50O31	Carpophyllum angustifolium	Glombitza,J.Nat.Prod.,62,(1999),1238	Carpophyllum	Sargassaceae
Metabolite_4161	388.102	388.101	-2.99424	C00010582	Ixoside	C16H20O11	Ixora chinensis	Takeda,Phytochem.,14,(1975),2647	Ixora	Rubiaceae
Metabolite_7825	658.356	658.351	-8.43772	C00038359	Acutissimatriterpene A;(+)-Acutissimatriterpene A	C40H50O8	Phyllanthus acutissima	Tuchinda,J.Nat.Prod.,71,(2008),655	Phyllanthus	Phyllanthaceae
Metabolite_9633	1092.54	1092.54	-8.57632	C00030095	Deapio-platycodin D	C52H84O24	Platycodon grandiflorum	Fu,J.Nat.Med.,60,(2006),68	Platycodon	Campanulaceae/Lobeliaceae
Metabolite_4148	386.149	386.148	-1.90885	C00026738	GS-1	C20H22N2O6	Gelsemium sempervirens Ait.f.	Kitajima,Chem.Pharm.Bull.,51,(2003),1211	Gelsemium	Gelsemiaceae
Metabolite_4856	448.122	448.122	-1.41188	C00010482	Aralidioside	C18H24O13	Verbena brasiliensis VELL	Ono,Chem.Pharm.Bull.,54,(2006),1421	Verbena	Verbenaceae
Metabolite_5454	491.19	491.194	8.10013	C00037219	Grossamide K	C28H29NO7	Hibiscus cannabinus	Seca,Phytochem.,58,(2001),1219	Hibiscus	Malvaceae
Metabolite_7231	623.282	623.276	-9.78208	C00027363	Fenfangjine H	C37H39N2O7	Stephania tetrandra	Ogino,Heterocycles,48,(1998),311	Stephania	Menispermaceae
Metabolite_301	115.064	115.063	-8.64749	C00001388	L-Proline	C5H9NO2	Escherichia coli	Simomi,Proc. Natl. Acad. Sci. USA,69,(1972),2663	Escherichia	Enterobacteriaceae
Metabolite_5310	481.111	481.108	-6.41436	C00007821	2-(4-Methoxyphenyl)-2,2-dimethylethyl glucosinolate	C18H27NO10S2	Moringa peregrina	El Migirab,Phytochem.,16,(1977),1719	Moringa	Moringaceae
Metabolite_3445	324.088	324.085	-9.27554	C00032165	Skimmin;(-)-Skimmin	C15H16O8	Stellera chamaejasme L.	Jiang,Chem.Pharm.Bull.,50,(2002),137	Stellera	Thymelaeaceae
Metabolite_5223	475.245	475.247	4.38302	C00017052	14(17)-Anhydroparaherquamide;Paraherquamide C	C28H33N3O4	Penicillium charlesii	Liesch,J.Antibiotics 43,(1990),1380	Penicillium	Trichocomaceae
Metabolite_5227	476.12	476.116	-8.17908	C00039821	Napyradiomycin SR;(-)-Napyradiomycin SR	C25H26Cl2O5	Streptomyces antimycoticus	Motohashi,J.Nat.Prod.,71,(2008),595	Streptomyces	Streptomycetaceae
Metabolite_5308	481.093	481.098	9.96098	C00014824	6-Hydroxydelphinidin 3-glucoside	C21H21O13	Alstroemeria spp.	Tatsuzawa,Heterocycles,57,(2002),1787	Alstroemeria	Alstroemeriaceae
Metabolite_9868	1172.59	1172.59	-2.44387	C00017176	1-Hydroxy-Cytorhodin A;1-Hydroxycytorhodin A;Obelmycin B	C60H88N2O21	Streptomyces violaceus	Johdo,J.Antibiotics 44,(1991),1110	Streptomyces	Streptomycetaceae
Metabolite_8276	710.115	710.111	-5.4328	C00025537	Chetomin	C31H30N6O6S4	Chaetonium cochliodes	Save,J.Chem.Soc.,Perkin Trans.,1,(1972),472	0	0
Metabolite_764	149.052	149.051	-6.53612	C00001379	L-Methionine	C5H11NO2S	Arabidopsis thaliana	Nikiforova,Plant Physiol.,138,(2005),304	Arabidopsis	Cruciferae
Metabolite_3208	305.993	305.995	6.97111	C00038518	Ascidiathiazone B	C12H6N2O6S	Aplidium sp.	Pearce,J.Nat.Prod.,70,(2007),936	0	0
Metabolite_8395	729.402	729.395	-9.63886	C00042781	Nocardimicin A;(-)-Nocardimicin A	C37H55N5O10	Nocardia sp. TP-A0674	Ikeda,J.Nat.Prod.,68,(2005),1061	Nocardia	Nocardiaceae
Metabolite_8394	729.408	729.41	2.63994	C00028261	Exumolide A	C41H55N5O7	Dolabella auricularia	Jenkins,Tetrahedron Lett.,39,(1998),2463	0	0
Metabolite_3452	324.142	324.143	3.22768	C00017646	Antibiotic DO 248A;Resorcinomycin A	C14H20N4O5	Streptomyces roseoverticillatus DO-248	Kondo,J.Antibiotics,42,(1989),1	Streptomyces	Streptomycetaceae
Metabolite_5167	471.247	471.247	-0.40692	C00017246	Glucolanomycin	C23H37NO9	Pycnidiophora dispersa	O'Sullivan,J.Antibiotics 45,(1992),306	Pycnidiophora	Sporormiaceae
Metabolite_5168	471.274	471.275	3.02927	C00046814	Malyngamide O;(-)-Malyngamide O	C25H42ClNO5	Stylocheilus longicauda	Gallimore,J.Nat.Prod.,63,(2000),1422	Stylocheilus	Aplysiidae
Metabolite_7278	624.354	624.351	-4.10193	C00047572	Simplexin E;(+)-Simplexin E	C33H52O11	Klyxum simplex	Wu,J.Nat.Prod.,72,(2009),994	0	0
Metabolite_3535	331.131	331.132	4.38876	C00025154	Angustoline;(-)-Angustoline	C20H17N3O2	Mitragyna hirsuta Havil	Phillipson,J.Nat.Prod.,45,(1982),145	Mitragyna	Rubiaceae
Metabolite_5323	482.178	482.179	1.63478	C00035964	6-O-(4-Methoxybenzoyl)-ajugol;(-)-6-O-(4-Methoxybenzoyl)-ajugol	C23H30O11	Tabebuia avellanedae	Awale,Chem.Pharm.Bull.,53,(2005),710	Tabebuia	Bignoniaceae
Metabolite_3537	331.152	331.153	3.87323	C00027014	Polanrazine E	C17H21N3O4	Leptosphaeria maculans	Pedras,Phytochem.,58,(2001),905	Leptosphaeria	Phaeosphaeriaceae
Metabolite_7297	625.34	625.346	9.7353	C00040484	Theopederin J;(+)-Theopederin J	C32H51NO11	Theonella swinhoei	Wegerski,J.Nat.Prod.,70,(2007),89	0	0
Metabolite_5333	484.117	484.116	-2.07787	C00031658	Cassigarol G	C28H20O8	Caragana tibetica KOM.	Xiang,Chem.Pharm.Bull.,53,(2005),1204	Caragana	Fabaceae
Metabolite_717	146.106	146.106	-1.34042	C00001378	L-Lysine	C6H14N2O2	Trifolium pratense L.	Wong,Chem.Ind.(London),(1961),1963;Harper,J.Chem.Soc.,Chem.Commun.,(1965),310;Kazakov,Khim.Prir.Soedin.,(1976),258	Trifolium	Fabaceae
Metabolite_5312	481.178	481.174	-9.26215	C00018560	Akrobomycin;R 20P1;Rubomycin Q1	C26H27NO8	Actinomadura roseoviolacea 1029-AV1	Imamura,J. Antibiotics,37,(1984),83	Actinomadura	Thermomonosporaceae
Metabolite_8400	731.548	731.555	9.46496	C00049544	Aralia cerebroside	C40H77NO10	Aralia elata	Kang,J.Nat.Prod.,62,(1999),1059	Aralia	Araliaceae
Metabolite_8384	726.102	726.106	5.86241	C00016158	Sch 52900;(6S,6'S,7S,7'S)-2-De(hydroxymethyl)-19'-deoxy-6,6'-dihydroxy-2-(1-hydroxyethyl)-chaetocin	C31H30N6O7S4	Gliocladium sp. (Culture SCF-1168)	Chu,J.Antibiotics 48,(1995),1440	Gliocladium	Hypocreaceae
Metabolite_3222	306.165	306.168	9.89535	C00030023	Creoside II	C14H26O7	Rhodiola crenulata (HOOK.f.et Thoms.) H.OHBA	Nakamura,Chem.Pharm.Bull.,56,(2008),536	Rhodiola	Crassulaceae
Metabolite_5331	484.106	484.106	-0.75385	C00048978	Falconensin B;(+)-Falconensin B	C23H26Cl2O7	Emericella falconensis	Ogasawara,Phytochem.,47,(1998),1131	0	0
Metabolite_3318	315.069	315.069	2.6965	C00042679	Laughine	C11H18BrN5O	Eurypon laughlini	Williams,J.Nat.Prod.,68,(2005),327	0	0
Metabolite_3237	308.053	308.053	1.60301	C00039231	Fulvic acid	C14H12O8	Penicillium striatisporum	Capon,J.Nat.Prod.,70,(2007),1746	Penicillium	Trichocomaceae
Metabolite_3531	331.029	331.032	9.36901	C00046316	Plakortamine D	C15H14BrN3O	Plakortis nigra	Sandler,J.Nat.Prod.,65,(2002),1258	0	0
Metabolite_5292	480.071	480.069	-4.29561	C00016800	11-O-Demethylpradinone II	C24H16O11	Actinomadura verrucosospora subsp. neohibisca E-40 mutant	Furumai,J.Antibiotics 46,(1993),412	Actinomadura	Thermomonosporaceae
Metabolite_5260	477.227	477.226	-1.15758	C00039876	Notoamide G;(+)-Notoamide G	C27H31N3O5	Aspergillus sp.	Tsukamoto,J.Nat.Prod.,71,(2008),2064	Aspergillus	Trichocomaceae
Metabolite_3353	316.212	316.215	8.71117	C00016170	Benzastatin A;Benzastatine A;(Z)-4-Amino-3-[3-(methoxymethyl)-6,7-dimethyl-2,6-octadienyl]-benzamide	C19H28N2O2	Streptomyces nitrosporeus 30643	Kim,J.Antibiotics 49,(1996),20	Streptomyces	Streptomycetaceae
Metabolite_3492	329.084	329.082	-6.23691	C00038540	Auxarconjugatin B	C18H16ClNO3	Auxarthron conjugatum	Hosoe,Phytochem.,52,(1999),459	Auxarthron	Onygenaceae
Metabolite_3509	330.089	330.087	-4.86992	C00020436	Bibsanin	C15H19ClO6	Achillea biebersteinii	Yusupov,Khim. Prir. Soedin.,(1979),580	Achillea	Asteraceae
Metabolite_3510	330.094	330.095	4.41881	C00035153	Pseudolaroside B;(-)-Pseudolaroside B	C14H18O9	Pseudolarix kaempferi Gord.	Liu,Phytochem.,67,(2006),1395	Pseudolarix	Pinaceae
Metabolite_3362	317.294	317.293	-4.50508	C00007543	4-Hydroxysphinganine	C18H39NO3	Arabidopsis thaliana	Lynch,New Phytologist,161,(2004),677	Arabidopsis	Cruciferae
Metabolite_5257	477.175	477.179	8.86183	C00028187	Didesmethylrocaglamide	C27H27NO7	Aglaia forbesii	Dumontet,Tetrahedron,52,(1996),6931	Aglaia	Meliaceae
Metabolite_10129	1243.76	1243.77	4.92858	C00016112	(-)-Aflastatin B;Aflastatin B	C61H113NO24	Streptomyces sp. MRI 142	Ono,J.Antibiotics 51,(1998),1019	Streptomyces	Streptomycetaceae
Metabolite_8345	722.344	722.35	8.56229	C00027851	Anchinopeptolide A	C34H46N10O8	Anchinoe tenacior	Casapullo,J.Nat.Prod.,57,(1994),1227	Anchinoe	Hymedesmiidae
Metabolite_8344	722.332	722.33	-2.62551	C00048107	Sculponin E;(-)-Sculponin E	C40H50O12	Isodon sculponeatus	Li,J.Nat.Prod.,72,(2009),1851	Isodon	Labiatae
Metabolite_7259	624.095	624.09	-7.74378	C00039988	Phelligridin I	C33H20O13	Phellinus igniarius	Wang,J.Nat.Prod.,70,(2007),296	Phellinus	Hymenochaetaceae
Metabolite_3365	318.025	318.026	2.88994	C00044722	Diplyne D;(-)-Diplyne D	C16H15BrO2	Diplastrella sp.	Lerch,J.Nat.Prod.,66,(2003),667	0	0
Metabolite_8303	714.332	714.329	-4.35515	C00048751	Leucospilotaside C	C35H54O13S	Holothuria leucospilota	Blunt,Nat.Prod.Rep.,27,(2010),165	Holothuria	Holothuriidae
Metabolite_3480	328.079	328.079	0.635708	C00002981	Bergenin	C14H16O9	Woodfordia floribunda	St.Pyrek,Rocz.Chem.,51,(1977),1679	Woodfordia	Lythraceae
Metabolite_3346	316.186	316.189	6.84743	C00010302	Linalool glucoside;Linaloyl beta-D-glucopyranoside	C16H28O6	Arachniodes maximowiczii	Naves,Helv.Chim.Acta.,46,(1963),1056;Helv.Chim.Acta.,46,(1963),2551	Arachniodes	Dryopteridaceae
Metabolite_3313	314.246	314.246	-0.362692	C00034432	9,10-Epoxy-18-hydroxy-octadecanoic acid	C18H34O4	Prunus avium	Peschel,Phytochem.,68,(2007),1017	Prunus	Rosaceae
Metabolite_3307	314.122	314.12	-6.02188	C00018051	TM 64	C16H18N4OS	Thermoactinomyces strain No.TM-64	Omura,J. Antibiotics,28,(1975),609	Thermoactinomyces	Thermoactinomycetaceae
Metabolite_8336	722.185	722.185	-1.0226	C00009195	5-O-beta-D-Glucosylluteoliflavan-(4->8)-eriodictyol	C36H34O16	Sorghum vulgare	Harborne, The Handbook of Natural Flavonoids, 2, (1999), 355,Flavans and proanthocyanidins;Gujer,Phytochem.,25,(1986),1431	Sorghum	Poaceae
Metabolite_3332	316.022	316.022	0.296452	C00011154	3-O-Methylellagic acid	C15H8O8	Eugenia jambolana	Mahmoud,Phytochem.,58,(2001),1239	Eugenia	Myrtaceae
Metabolite_5282	479.326	479.325	-2.57732	C00028843	Pingpeimine B	C27H45NO6	Fritillaria ussuriensis	Xu,Acta Pharm.Sin.,23,(1988),902	Fritillaria	Liliaceae
Metabolite_3321	315.103	315.101	-5.86119	C00026247	Luotonin E	C19H13N3O2	Peganum nigellastrum	Ma,Heterocycles,51,(1999),1883	Peganum	Nitrariaceae
Metabolite_737	148.018	148.019	7.37271	C00007474	2-Oxo-4-(methylthio)butanoic acid;4-(Methylthio)-2-oxobutanoic acid	C5H8O3S	Arabidopsis thaliana	Textor,Planta,218,(2004),1026	Arabidopsis	Cruciferae
Metabolite_3336	316.071	316.074	9.60322	C00035859	Palmarumycin CP1	C20H12O4	Jatropha curcas	Ravindranath,Phytochem.,65,(2004),2387	Jatropha	Euphorbiaceae
Metabolite_3298	314.065	314.064	-2.6794	C00033253	Norbergenin	C13H14O9	Woodfordia fruticosa	Tanayama,Phytochem.,22,(1983),1053	Woodfordia	Lythraceae
Metabolite_9851	1160.67	1160.68	6.77106	C00041690	neo-Kauluamine	C72H88N8O6	Acanthostrongylophora sp.	Karunanchi,J.Nat.Prod.,69,(2006),1034	0	0
Metabolite_7232	623.342	623.346	5.76566	C00044868	Leueantine B;(+)-Leueantine B	C36H49NO8	Aconitum hemsleyanum var.leucanthus	Li,J.Nat.Prod.,66,(2003),269	Aconitum	Ranunculaceae
Metabolite_8359	724.278	724.273	-6.78947	C00040781	1-Cinnamoyl-3-acetyl-11-hydroxymeliacarpin;(+)-1-Cinnamoyl-3-acetyl-11-hydroxymeliacarpin	C38H44O14	Melia azedarach	Bohnenstengel,Phytochem.,50,(1999),977	Melia	Meliaceae
Metabolite_3246	309.124	309.121	-7.39581	C00049307	Sporovexin C;(-)-Sporovexin C	C15H19NO6	Sporormiella vexans JS306	Soman,J.Nat.Prod.,62,(1999),659	Sporormiella	Sporormiaceae
Metabolite_8372	724.448	724.441	-9.9506	C00041949	Trungapeptin B	C40H60N4O8	Lyngbya majuscula	Bunyajetpong,J.Nat.Prod.,69,(2006),1539	0	0
Metabolite_5231	476.162	476.162	-1.26334	C00032025	Mitrasulgynine;(+)-Mitrasulgynine	C23H28N2O7S	Mitragyna speciosa	Takayama,Chem.Pharm.Bull.,52,(2004),916	Mitragyna	Rubiaceae
Metabolite_715	146.071	146.069	-9.45681	C00001359	L-Glutamine	C5H10N2O3	Arabidopsis thaliana	Nikiforova,Plant Physiol.,138,(2005),304	Arabidopsis	Cruciferae
Metabolite_8238	704.429	704.435	8.047	C00014891	Ustilipid A	C36H64O13	Ustilago maydis DSM 11494	Kurz,J.Antibiotics 56,(2003),91	0	0
Metabolite_8364	724.293	724.3	8.52146	C00039458	Isothalictrine	C41H44N2O10	Isopyrum thalictroides	Philipov,Phytochem.,51,(1999),1161	Isopyrum	Ranunculaceae
Metabolite_3388	318.207	318.204	-7.809	C00000854	Neomenthyl-beta-D-glucoside;d-Neomenthyl glucoside	C16H30O6	Mentha piperita	Croteau,Plant Physiol,64,(1979),169	Mentha	Labiatae
Metabolite_8237	704.365	704.369	4.96209	C00027214	Hemsine C	C41H48N6O5	Paliurus hemsleyanus	Lin,Helv.Chim.Acta,86,(2003),127	Paliurus	Rhamnaceae
Metabolite_8280	710.423	710.424	2.25766	C00033806	Elephanoside A;(-)-Elephanoside A	C38H62O12	Yucca elephantipes Regel.	Zhang,Phytochem.,69,(2008),264	Yucca	Agavaceae
Metabolite_5306	481.061	481.06	-2.72747	C00048762	Lynamicin D	C24H17Cl2N3O4	Marinispora sp.	Blunt,Nat.Prod.Rep.,27,(2010),165	0	0
Metabolite_3529	330.277	330.277	-0.647477	C00042063	1-Monopalmitin	C19H38O4	Morinda citrifolia L	Pawlus,J.Nat.Prod.,68,(2005),1720	Morinda	Rubiaceae
Metabolite_3408	319.224	319.226	6.4332	C00028517	Lycoposerramine A	C18H29N3O2	Lycopodium serratum	Takayama,Org.Lett.,3,(2001),4165	Lycopodium	Lycopodiaceae
Metabolite_9847	1160.59	1160.58	-7.58162	C00042199	Acutanguloside E methyl ester;(-)-Acutanguloside E methyl ester	C60H88O22	Barringtonia acutangula	Mills,J.Nat.Prod.,68,(2005),311	Barringtonia	Lecythidaceae
Metabolite_7292	625.325	625.325	-0.226188	C00017773	Rhizoxin;NSC 332598;WF 1360	C35H47NO9	Rhizopus sp. No. F-1360	Kiyoto,J.Antibiotics,39,(1986),762	Rhizopus	Mucoraceae
Metabolite_3521	330.18	330.179	-1.6263	C00027833	AM4299A	C15H26N2O6	Chromelosporium fulvum	Morishita,J.Antibiotics,47,(1994),1065	0	0
Metabolite_3261	310.129	310.128	-2.91439	C00017647	Antibiotic DO 248B;Resorcinomycin B	C13H18N4O5	Streptomyces roseoverticillatus DO-248	Kondo,J.Antibiotics,42,(1989),1	Streptomyces	Streptomycetaceae
Metabolite_5300	480.146	480.142	-7.68769	C00047436	Dilatrin	C26H24O9	Haemodorum simplex	Dias,J.Nat.Prod.,72,(2009),1075	Haemodorum	Haemodoraceae
Metabolite_5301	480.22	480.216	-7.25248	C00028707	N-Methylstaurosporine	C29H28N4O3	Streptomyces longisporoflavus	Cai,J.Antibiotics,49,(1996),1060	Streptomyces	Streptomycetaceae
Metabolite_7299	625.375	625.369	-9.66675	C00040939	Destruxin Ed1	C30H51N5O9	Metahizium anisopliae	Jegorov,Phytochem.,49,(1998),1815	0	0
Metabolite_425	129.058	129.058	2.52354	C00026478	Quinoline	C9H7N	Oreophoetes peruana	Eisner,J.Exp.biol.,200,(1997),2493	0	0
Metabolite_419	129.041	129.043	9.83822	C00007403	Pyroglutamic acid	C5H7NO3	Arabidopsis thaliana	Fiehn,Anal.Chem.,72,(2000),3573	Arabidopsis	Cruciferae
Metabolite_4797	444.207	444.205	-4.31366	C00020778	Aurantiamide acetate	C27H28N2O4	Pierreodendron kerstingii Little.	Kupchan,J.Org.Chem.,40,(1975),654;Ampofo,J.Nat.Prod.,48,(1985),863	Pierreodendron	Simaroubaceae
Metabolite_7764	655.341	655.336	-8.66236	C00018276	Streptovaricin U	C36H49NO10	Streptomyces spectabilis	Knoll,J. Antibiotics,33,(1980),249	Streptomyces	Streptomycetaceae
Metabolite_4277	399.897	399.895	-5.84889	C00034166	Polysiphenol	C14H10Br2O4	Polysyphonia ferulacea	Kovacs,Phytochem.,69,(2008),1084	0	0
Metabolite_4777	444.169	444.169	-0.679149	C00026560	Petromurin C	C26H24N2O5	Petromyces muricatus	Ooike,Can.J.Chem.,75,(1997),625	Petromyces	Trichocomaceae
Metabolite_7477	637.389	637.394	7.85516	C00017607	6108A1;Antibiotic 6108A1	C33H55N3O9	Micromonospora fastidiosa sp. nov. BA06108 (FERM P-9897)	Funaishi,J.Antibiotics,43,(1990),938	Micromonospora	Micromonosporaceae
Metabolite_9985	1208.47	1208.48	6.91336	C00039333	Hamigerol A	C56H88O20S4	Hamigera hamigera	Cheng,J.Nat.Prod.,70,(2007),1195	0	0
Metabolite_4280	400.11	400.114	8.25061	C00030589	Kankanoside C;(-)-Kankanoside C	C15H25ClO10	Cistanche tubulosa	Xie,Chem.Pharm.Bull.,54,(2006),669	Cistanche	Orobanchaceae
Metabolite_7771	655.414	655.416	2.14354	C00018183	Antibiotic SF 1902A1;Globomycin	C32H57N5O9	Streptomyces halstedii No.13912	Inukai,J. Antibiotics,31,(1978),410	Streptomyces	Streptomycetaceae
Metabolite_4246	396.131	396.134	6.41877	C00023181	Eupalinilide E	C20H25ClO6	Eupatorium lindleyanum	Huo,J. Nat. Prod.,67,(2004),1470	Eupatorium	Asteraceae
Metabolite_4245	396.027	396.03	7.1518	C00011401	Obtusenol	C15H26Br2O2	Laurencia obtusa	Imre,Phytochem.,20,(1981),833	0	0
Metabolite_4813	446.074	446.077	7.44658	C00048002	Mollicellin E	C22H19ClO8	Chaetomium brasiliense	Khumkomkhet,J.Nat.Prod.,72,(2009),1487	Chaetomium	Chaetomiaceae
Metabolite_4811	446.048	446.051	5.55621	C00028980	Securamine A	C20H20BrClN4O	Securiflustra securifrons	Rahbaek,J.Org.Chem.,61,(1996),887	0	0
Metabolite_4805	445.108	445.108	-1.54119	C00007850	5-Oxooctyl glucosinolate;Glucocappasalin	C15H27NO10S2	Capparis salicifolia	Brown,Phytochem.,7,(1968),1409	Capparis	Capparaceae
Metabolite_4257	396.396	396.397	3.04583	C00035114	Hexacosanoic acid	C26H52O2	Arabidopsis thaliana	Molina,Phytochem.,67,(2006),2597	Arabidopsis	Cruciferae
Metabolite_9978	1200.71	1200.7	-6.74484	C00033421	Telosmoside A10	C62H104O22	Telosma procumbens	Huan,Chem.Pharm.Bull.,49,(2001),453	Telosma	Apocynaceae
Metabolite_7748	654.363	654.362	-1.9811	C00032828	Cilistol p	C34H54O12	Solanum cilistum	Zhu,Chem.Pharm.Bull.,49,(2001),1440	Solanum	Solanaceae
Metabolite_7741	654.339	654.34	2.86436	C00047793	Chisonimbolinin C;(-)-Chisonimbolinin C	C37H50O10	Chisocheton paniculatus	Yang,J.Nat.Prod.,72,(2009),2014	Chisocheton	Meliaceae
Metabolite_4352	406.048	406.05	6.4856	C00018468	Antibiotic MM 27696	C14H18N2O8S2	Streptomyces olivaceus CBS 349.80	Box,J. Antibiotics,35,(1982),1394	Streptomyces	Streptomycetaceae
Metabolite_4335	404.119	404.122	6.29039	C00017068	FR 900280;WF 2421	C19H20N2O8	Humicola grisea WF-2421	Nishikawa,J.Antibiotics 44,(1991),130	0	0
Metabolite_9991	1212.48	1212.49	3.92523	C00046636	Calcigeroside C1	C54H84O28S	Pentamera calcigera	Avilov,J.Nat.Prod.,63,(2000),65	0	0
Metabolite_4355	406.364	406.36	-8.79044	C00023137	4,4'-Diapophytofluene	C30H46	Staphylococcus aureus 209P	Taylor,Can. J. Biochem. Cell Biol.,61,(1983),892	Staphylococcus	Staphylococcaceae
Metabolite_4373	408.167	408.169	3.1809	C00024502	19S-Acetoxy-3-oxotabersonine;20(S)-Acetoxy-8-oxotabersonine	C23H24N2O5	Melodinus scandens	Chazelet,Ann.Pharm.Fr.,44,(1986),355	Melodinus	Apocynaceae
Metabolite_7719	653.356	653.356	0.0898234	C00041206	Taxuspine Z;(+)-Taxuspine Z	C37H51NO9	Taxus cuspidata	Parmar,Phytochem.,50,(1999),1267	Taxus	Taxaceae
Metabolite_4328	404.004	404.002	-4.76888	C00007313	UDP;Uridine 5'-diphosphate	C9H14N2O12P2	Escherichia coli	Fricke,J. Bacteriol.,177,(1995),517	Escherichia	Enterobacteriaceae
Metabolite_4323	403.133	403.135	5.26899	C00028477	Lissoclin B	C23H21N3O2S	Lissoclinum sp.	Searle,J.Org.Chem.,59,(1994),6600	0	0
Metabolite_4320	402.229	402.231	4.73526	C00038433	Ambiguine I isonitrile	C26H30N2O2	Fischerella ambigua	Mo,J.Nat.Prod.,72,(2009),894	0	0
Metabolite_7739	654.328	654.325	-4.86282	C00015135	Sordarin-1-glucose ester	C33H50O13	Rhizopus japonicus IMI 21600	Hall,J.Antibiotics 54,(2001),948	Rhizopus	Mucoraceae
Metabolite_4311	402.099	402.097	-4.48296	C00017958	L-(N5-Phosphono)methionine-S-sulfoximinyl-L-alanyl-L-alanine;L-(N5-Phosphono)methionine-S-sulfoximinylalanylalanine;NSC 183742	C11H23N4O8PS	Streptomyces sp. X-13152	Pruless,J.Antibiotics,26,(1973),261	Streptomyces	Streptomycetaceae
Metabolite_4308	401.98	401.983	7.04783	C00047673	4-O-Methyldechlorodiploicin	C17H13Cl3O5	Diploicia canescens	Millot,J.Nat.Prod.,72,(2009),2177	Diploicia	Caliciaceae
Metabolite_4237	395.031	395.034	9.49047	C00007854	n-Phenyl glucosinolate	C13H17NO9S2	Armoracia lapathifolia	Ettlinger,Recent Adv. Phytochem.,1,(1968),59	Armoracia	Cruciferae
Metabolite_4150	386.178	386.174	-8.4096	C00016809	(-)-Fiscalin B;Fiscalin B	C23H22N4O2	Neosartorya fischeri	Wong,J.Antibiotics 46,(1993),545	Neosartorya	Trichocomaceae
Metabolite_4153	386.25	386.253	8.53502	C00028054	Circinamide	C18H34N4O5	Anabaena circinalis	Shin,Tetrahedron,53,(1997),5747	Anabaena	Euphorbiaceae
Metabolite_4158	387.157	387.154	-8.14851	C00007428	6-(2Methoxybenzylamino)purine-9-beta-D-ribofuranoside	C18H21N5O5	Arabidopsis thaliana	Tarkawska,Physiologia Plantarum,117,(2003),579	Arabidopsis	Cruciferae
Metabolite_414	128.095	128.095	0.308143	C00042856	Pipecolamide	C6H12N2O	Acacia rigidula Benth.	Clement,Phytochem.,49,(1998),1377	Acacia	Fabaceae
Metabolite_583	139.988	139.987	-4.74176	C00019559	Acetyl phosphate	C2H5O5P	Escherichia coli KO11	Underwood,Appl. Environ. Microbiol.,70,(2004),2734	Escherichia	Enterobacteriaceae
Metabolite_412	128.047	128.047	4.84644	C00048033	Osmundalactone;(-)-Osmundalactone	C6H8O3	Angiopteris caudatiformis	Yu,J.Nat.Prod.,72,(2009),921	Angiopteris	Marattiaceae
Metabolite_7820	658.331	658.335	6.36285	C00015230	Neosordarin	C36H50O11	Sordaria araneosa	Davoli,J. Antibiotics,55,(2002),377	Sordaria	Sordariaceae
Metabolite_7453	636.414	636.408	-8.87192	C00042674	Lanceolitol B7	C32H60O12	Solanum lanceolatum	Herrera-Salgado,J.Nat.Prod.,68,(2005),1031	Solanum	Solanaceae
Metabolite_7838	659.361	659.367	8.98342	C00017802	Antibiotic L 681217	C36H53NO10	Streptomyces cattleya ATCC 39203	Kempf,J.Antibiotics,39,(1986),1361	Streptomyces	Streptomycetaceae
Metabolite_7843	660.284	660.278	-9.28708	C00031499	12-O-Deacetyltrichilin H	C34H44O13	Melia azedarach	Zhou,Chem.Pharm.Bull.,53,(2005),1362	Melia	Meliaceae
Metabolite_7857	664.091	664.093	2.88158	C00019568	Nicotinic acid dinucleotide	C21H26N6O15P2	Escherichia coli	Rizzi,Curr. Opin. Struct. Biol.,12,(2002),709	Escherichia	Enterobacteriaceae
Metabolite_7860	665.322	665.317	-7.23286	C00028176	Dianthin A	C33H43N7O8	Dianthus superbus	Wang,Phytochem.,49,(1998),1453	Dianthus	Caryophyllaceae
Metabolite_4107	382.276	382.272	-9.67695	C00022114	2,6,10,14-Tetramethyl-6,10,15-hexadecatriene-2,3,8,14-tetrol 8-acetate	C22H38O5	Geigeria burkei	Bohlmann,Phytochem.,21,(1982),1739	Geigeria	Asteraceae
Metabolite_7855	664.052	664.055	3.65088	C00039018	Dictazoline A;(-)-Dictazoline A	C28H26Br2N8O2	Smenospongia cerebriformis	Dai,J.Nat.Prod.,71,(2008),1287	0	0
Metabolite_4119	383.925	383.924	-3.14112	C00042898	Pyrrolomycin H;(-)-Pyrrolomycin H	C12H8Cl4N2O4	Streptomyces fumanus	Charan,J.Nat.Prod.,68,(2005),277	Streptomyces	Streptomycetaceae
Metabolite_4133	384.921	384.917	-9.45086	C00041894	Stevensine	C11H9Br2N5O	Stylissa carteri	Eder,J.Nat.Prod.,62,(1999),184	0	0
Metabolite_7845	660.333	660.33	-4.52867	C00030343	Gambogoic acid A	C39H48O9	Garcinia hanburyi	Han,Chem.Pharm.Bull.,54,(2006),265	Garcinia	Clusiaceae/Clusiaceae-Guttiferae
Metabolite_7802	657.319	657.316	-4.37352	C00047827	Cycloaspeptide G;(-)-Cycloaspeptide G	C36H43N5O7	Isaria farinosa	Zhang,J.Nat.Prod.,72,(2009),1364	0	0
Metabolite_4204	391.269	391.272	9.29053	C00028951	Sachaconitine;Vilmorrianine D	C23H37NO4	Aconitum hemsleyanum var. circinatum	Gao,J.Nat.Prod.,70,(2007),876	Aconitum	Ranunculaceae
Metabolite_4201	391.102	391.106	9.36764	C00029035	Spallidamine	C22H17NO6	Corydalis pallida	Itoh,Phytochem.,29,(1990),2044	Corydalis	Fumariaceae
Metabolite_4835	447.185	447.189	9.37715	C00019516	Glycoerysodin	C23H29NO8	Erythrina senegalensis	Wandji,Phytochem.,39,(1995),677	Erythrina	Fabaceae
Metabolite_4825	446.186	446.186	0.175402	C00017101	Naphthomevalin	C25H31ClO5	Streptomyces sp. G.28	Henkel,J.Antibiotics 44,(1991),665	Streptomyces	Streptomycetaceae
Metabolite_4217	392.27	392.272	4.09626	C00022185	Apo-10'-zeaxanthinal	C27H36O2	Capsicum annuum	Maoka,J. Agric. Food Chem.,49,(2001),1601	Capsicum	Solanaceae
Metabolite_7787	656.32	656.32	-0.855028	C00047791	Chisonimbolinin A;(-)-Chisonimbolinin A	C36H48O11	Chisocheton paniculatus	Yang,J.Nat.Prod.,72,(2009),2014	Chisocheton	Meliaceae
Metabolite_7467	637.333	637.328	-8.09845	C00025833	Cycleahomine	C39H45N2O6	Cyclea peltata Diels	Kupchan,J.Org.Chem.,38,(1973),1846	Cyclea	Menispermaceae
Metabolite_4836	447.208	447.205	-8.61016	C00024846	Cardiopetamine	C27H29NO5	Delphinium cardiopetalum	Gonzalez,Phytochem.,25,(1986),1971; Gonzalez,Tetrahedron Lett.,24,(1983),3765; Fuente,Heterocycles,29,(1989),1577	Delphinium	Ranunculaceae
Metabolite_7817	658.302	658.299	-4.40015	C00039742	Meliatoxin B1	C35H46O12	Melia toosendan Sieb.et Zuce.	Tada,Phytochem.,51,(1999),787	Melia	Meliaceae
Metabolite_4186	390.173	390.171	-5.61366	C00035289	Dehydrotylophorine	C24H24NO4	Ficus septica	Lansky,J.Ethnopharmacol.,119,(2008),195	Ficus	Moraceae
Metabolite_10052	1217.63	1217.62	-8.38189	C00042892	Pursaethoside A;(-)-Pursaethoside A	C59H95NO25	Entada pursaetha	Leon,J.Nat.Prod.,68,(2005),1185	Entada	Fabaceae
Metabolite_449	130.026	130.027	6.03824	C00033964	Itaconic acid	C5H6O4	Sebertia acuminata	Callahan,Phytochem.,69,(2008),240	Sebertia	Sapotaceae
Metabolite_487	133.075	133.074	-4.73664	C00036384	1,4-Dideoxy-1,4-imino-D-arabinitol;D-AB1	C5H11NO3	Adenophora triphylla var.japonica	Asano,Phytochem.,53,(2000),379	Adenophora	Campanulaceae/Lobeliaceae
Metabolite_4677	436.355	436.355	0.312755	C00031572	Agavegenin D;(-)-Agavegenin D	C27H48O4	Agave americana	Jin,Chem.Pharm.Bull.,52,(2004),654	Agave	Agavaceae
Metabolite_7543	639.37	639.363	-9.89202	C00026874	Apicidin D1	C34H49N5O7	Fusarium sp.ATCC74289	Singh,J.Org.Chem.,67,(2002),815	0	0
Metabolite_4550	426.328	426.325	-8.90155	C00025530	Papillamidine;Nb-Formyl-Nb-nor-(+)-harappamine	C27H42N2O2	Buxus papilosa	Atta-ur-Rahman,J.Nat.Prod.(in press)	Buxus	Buxaceae
Metabolite_485	133.039	133.038	-9.13899	C00001342	L-Aspartic acid	C4H7NO4	Arabidopsis thaliana	Prade, L.et al.,J.Mol.Biol.,(2000),569-577	Arabidopsis	Cruciferae
Metabolite_4565	428.103	428.108	9.93775	C00043876	Rostratin A;(-)-Rostratin A	C18H24N2O6S2	Exserohilum rostratum	Tan,J.Nat.Prod.,67,(2004),1374	0	0
Metabolite_4557	427.018	427.02	5.56269	C00007445	Adenosine 5'-phosphosulfate	C10H14N5O10PS	Arabidopsis thaliana	Ohkama,Plant Cell Physiol.,43,(2002),1493	Arabidopsis	Cruciferae
Metabolite_7618	647.327	647.331	5.31084	C00038407	Aljesaconitine A	C34H49NO11	Aconitum japonicum	Wada,J.Nat.Prod.,70,(2007),1854	Aconitum	Ranunculaceae
Metabolite_7534	639.336	639.341	6.89558	C00044867	Leueantine A;(+)-Leueantine A	C36H49NO9	Aconitum hemsleyanum var.leucanthus	Li,J.Nat.Prod.,66,(2003),269	Aconitum	Ranunculaceae
Metabolite_7630	648.333	648.33	-4.76673	C00047157	8,8a-Dihydro-8-hydroxygambogenic acid;(-)-8,8a-Dihydro-8-hydroxygambogenic acid	C38H48O9	Garcinia hanburyi	Tao,J.Nat.Prod.,72,(2009),117	Garcinia	Clusiaceae/Clusiaceae-Guttiferae
Metabolite_7632	648.363	648.366	5.39061	C00023243	Hydratoperidinin	C39H52O8	Corbicula japonica	Maoka,J. Agric. Food Chem.,53,(2005),8357	Corbicula	Corbiculidae
Metabolite_4489	422.109	422.111	5.86906	C00016632	FL 120B	C22H18N2O7	Streptomyces chattanoogensis subsp. taitungensis subsp. nov. IY2-13	Lin,J.Antibiotics 47,(1994),675	Streptomyces	Streptomycetaceae
Metabolite_4515	423.368	423.371	7.37152	C00034680	Semiplenamide D;(-)-Semiplenamide D	C26H49NO3	Lyngbya semiplena	Tan,Phytochem.,68,(2007),954	0	0
Metabolite_4518	424.011	424.007	-9.34525	C00050091	Eschweilenol B	C20H8O11	Eschweilera coriacea	Yang,J.Nat.Prod.,61,(1998),901	Eschweilera	Lecythidaceae
Metabolite_4688	437.229	437.231	6.4793	C00002348	Lunarine	C25H31N3O4	Lunaria biennis	Harborne,Phytochemical Dictionary Second Edition,Taylor and Francis,(1999),Chapter31	Lunaria	Cruciferae
Metabolite_4689	437.245	437.241	-7.93856	C00026221	Racemodine;(-)-Racemodine	C23H35NO7	Senecio racemosus	Liddell,Nat.Prod.Rep.,14,(1997),653	Senecio	Asteraceae
Metabolite_4570	428.175	428.171	-9.33355	C00027563	Mequinine	C23H26NO7	Meconopsis quintuplinerva	Wang,Tianra Chanwu Yanjiu Yu Karfa,7,(1995),32	Meconopsis	Papaveraceae
Metabolite_480	132.057	132.058	2.20608	C00002725	Cinnamaldehyde	C9H8O	Cinnamomum zeylanicum	Harborne,Phytochemical Dictionary Second Edition,Taylor and Francis,(1999),Chapter42	Cinnamomum	Lauraceae
Metabolite_4649	434.13	434.133	5.54386	C00026658	Glucodichotomine B	C20H22N2O9	Stellaria dichotoma L.var. lanceolata	Morikawa,Chem.Pharm.Bull.,52,(2004),1194	Stellaria	Caryophyllaceae
Metabolite_4608	431.167	431.169	6.09187	C00015931	(+)-Aclidinomycin B;Aclidinomycin B	C21H25N3O7	Streptomyces halstedi KB012	Cang,J. Antibiotics,54,(2001),304	Streptomyces	Streptomycetaceae
Metabolite_7559	640.325	640.325	-0.899222	C00040766	12-O-Methylnimbolinin B	C36H48O10	Turraea holstii	Mulholland,Phytochem.,49,(1998),2585	Turraea	Meliaceae
Metabolite_4611	431.186	431.185	-2.59109	C00042249	Asterrelenin;(+)-Asterrelenin	C25H25N3O4	Aspergillus terreus	Li,J.Nat.Prod.,68,(2005),1243	Aspergillus	Trichocomaceae
Metabolite_4613	431.228	431.231	5.48255	C00018556	Myxopyronin B	C24H33NO6	Myxococcus fulvus strain Mx f50	Irschik,J. Antibiotics,36,(1983),1651	Myxococcus	Myxoccaceae
Metabolite_4639	433.193	433.189	-9.23516	C00026133	Karachine	C26H27NO5	Berberis aristata	Blasko,J.Am.Chem.Soc.,104,(1982),2039	Berberis	Berberidaceae
Metabolite_464	130.122	130.122	-2.12933	C00001400	Agmatine	C5H14N4	Lyallia kerguelensis	Hennion,Phytochem.,52,(1999),247	Lyallia	Hectorellaceae
Metabolite_467	131.045	131.046	4.91093	C00034027	L-Asparaginate	C4H7N2O3	Arabidopsis thaliana	Ghassemian,Phytochem.,69,(2008),2899	Arabidopsis	Cruciferae
Metabolite_7579	642.259	642.258	-1.85707	C00000668	Cannabisin E	C36H38N2O9	Cannabis sativa	Sakakibara,Phytochem.,30,(1991),3013;Sakakibara,Phytochem.,31,(1992),3219;Sakakibara,Phytochem.,38,(1995),1003	Cannabis	Cannabaceae
Metabolite_7556	640.277	640.273	-5.80601	C00033986	Ixerisoside K	C31H44O14	Ixeris repens A.Gray	Zidorn,Phytochem.,69,(2008),2270	Ixeris	Asteraceae
Metabolite_7594	643.307	643.304	-4.28101	C00029167	Ulongamide B	C32H45N5O7S	Lyngbya sp. NIH309	Luesch,J.Nat.Prod.,65,(2002),996	0	0
Metabolite_4574	428.374	428.377	6.16425	C00036990	Cyclovirobuxeine A	C28H48N2O	Buxus malayana Ridl.	Nakano,J.Chem.Soc.,C,(1966),1412;Khuong-Huu-Laine,Ann.Pharm.Fr.,28,(1970),211	Buxus	Buxaceae
Metabolite_7553	640.221	640.216	-8.01653	C00035149	Picroroside C;(-)-Picroroside C	C33H36O13	Neopicrorhiza scrophulariiflora	Kim,Phytochem.,67,(2006),2691	Neopicrorhiza	Plantaginaceae
Metabolite_4579	429.145	429.144	-2.14244	C00047430	Cottoquinazoline A;(+)-Cottoquinazoline A	C23H19N5O4	Aspergillus versicolor	Fremlin,J.Nat.Prod.,72,(2009),666	Aspergillus	Trichocomaceae
Metabolite_478	132.055	132.053	-8.56783	C00001341	L-Asparagine	C4H8N2O3	Trifolium pratense L.	Wong,Chem.Ind.(London),(1961),1963;Harper,J.Chem.Soc.,Chem.Commun.,(1965),310;Kazakov,Khim.Prir.Soedin.,(1976),258	Trifolium	Fabaceae
Metabolite_7555	640.255	640.252	-4.91495	C00034903	Swietephragmin G	C34H40O12	Swietenia mahogani	Abdelgaleil,Phytochem.,67,(2006),452	Swietenia	Meliaceae
Metabolite_7524	638.376	638.382	8.99955	C00012232	6-Formyl-2,3,3a,4,5,8,9,11a-octahydro-10-(hydroxymethyl)-3-methylene-4-(2-methyl-1-oxobutoxy)-2-oxocyclodeca[b]furan-5-yl ester 9,12,15-octadecatrienoic acid	C38H54O8	Acanthospermum hispidum	Bohlmann,Phytochem.,18,(1979),625;Searman,Phytochem.,18,(1979),1065	Acanthospermum	Asteraceae
Metabolite_4420	415.186	415.19	8.83485	C00011268	Acetylaszonalenin;LL-S 490beta;LL-S490beta	C25H25N3O3	Aspergillus sp.	Cole,Handbook of Secondary Fungal Metabolites,Volume I,(2003);Ellestad,J.Org.Chem.,38,(1973),4204	Aspergillus	Trichocomaceae
Metabolite_524	135.068	135.068	2.89015	C00007327	Phenylacetaldoxime	C8H9NO	Arabidopsis thaliana	Wittstock,J.Biol.Chem.,275,(2000),14659	Arabidopsis	Cruciferae
Metabolite_7674	652.246	652.252	8.82051	C00013137	Acetylpringleine;[3R-(3alpha,5beta,5aalpha,6alpha,7alpha,9beta,9aalpha,10R*)]-5a-[(Acetyloxy)methyl]octahydro-2,2,9-trimethyl-, 6,10-diacetate 5,7-dibenzoate 2H-3,9a-methano-1-benzoxepin-5,6,7,9,10-pentol	C35H40O12	Celastrus pringlei	Sanchez,Phytochem.,26,(1987),2631;Rozsa,J.Chem.Soc.Perkin Trans.1,(1989),1089;Tu,J.Nat.Prod.,53,(1990),603	Celastrus	Celastraceae
Metabolite_519	135.056	135.054	-7.61435	C00001490	Adenine	C5H5N5	Cicer arietinum	Zlataroff,Z. Nahr. Genussm.,31,(1916),180	Cicer	Fabaceae
Metabolite_4414	414.293	414.292	-0.863433	C00023140	4,4'-Diapocaroten-4-al;4,4'-Diapolycopen-4-al	C30H38O	Methylobacterium rhodinum	Kleinig,Z. Naturforsch. C.,37,(1982),758	Methylobacterium	Methylobacteriaceae
Metabolite_4400	412.984	412.983	-2.33246	C00043458	Discorhabdin B;(+)-Discorhabdin B	C18H12BrN3O2S	Latrunculia brevis	Reyes,J.Nat.Prod.,67,(2004),463	0	0
Metabolite_4394	412.035	412.031	-9.85901	C00002679	Turgorin	C13H16O13S	Oxalis acetosella	Harborne,Phytochemical Dictionary Second Edition,Taylor and Francis,(1999),Chapter40	Oxalis	Oxalidaceae
Metabolite_7691	652.359	652.354	-6.58899	C00029942	Cherimolacyclopeptide D	C29H48N8O9	Annona cherimola	Wele,Chem.Pharm.Bull.,54,(2006),690	Annona	Annonaceae
Metabolite_4408	414.043	414.041	-3.82907	C00039326	Halenaquinol sulfate	C20H14O8S	Xestospongia cf. carbonaria	Nakao,J.Nat.Prod.,70,(2007),689	0	0
Metabolite_4438	416.275	416.272	-8.1513	C00035336	Machillene	C29H36O2	Machilus zuihoensis	Cheng,Phytochem.,66,(2005),1180	Machilus	Lauraceae
Metabolite_7653	650.343	650.345	4.08959	C00039813	Myrtucommulone D;(+)-Myrtucommulone D	C38H50O9	Corymbia scabrida	Carroll,J.Nat.Prod.,71,(2008),1564	Corymbia	Myrtaceae
Metabolite_4467	420.009	420.005	-8.85653	C00029226	Volutamide A	C15H22Br2N2O2	Amathia convoluta	Montanari,Tetrahedron,52,(1996),5371	Amathia	Vesiculariidae
Metabolite_4478	420.362	420.36	-3.2785	C00036260	28-Nortyphasterol	C27H48O3	Arabidopsis thaliana (L.) Heynh.	Bajguz,Phytochem.,62,(2003),1027	Arabidopsis	Cruciferae
Metabolite_10011	1214.57	1214.57	-1.11404	C00017100	Avidinorubicin	C60H86N4O22	Streptomyces avidinii NR0576	Aoki,J. Antibiotics,44,(1991),635	Streptomyces	Streptomycetaceae
Metabolite_4460	418.321	418.324	5.59953	C00023138	4-Hydroxy-4,4'-diaponeurosporene	C30H42O	Streptococcus faecium UNH 564P	Taylor,Biochem. J.,139,(1974),761	Streptococcus	Streptococcaceae
Metabolite_4720	440.175	440.175	0.594521	C00018768	Clindamycin sulfoxide;U 25026A	C18H33ClN2O6S	Streptomyces punipalus	Argoudelis,J. Antibiotics,22,(1969),309	Streptomyces	Streptomycetaceae
Metabolite_4444	417.26	417.259	-1.8925	C00018348	Antibiotic KA 6606IV;Sporaricin D	C18H35N5O6	Saccharopolyspora hirsuta subsp. kobensis	Deushi,J. Antibiotics,34,(1981),811	Saccharopolyspora	Pseudonocardiaceae
Metabolite_7670	652.228	652.231	4.4828	C00006597	Bosistoabiflavanone dimer	C38H36O10	Bosistoa brassii	Harborne, The Handbook of Natural Flavonoids, 1, (1999), 645,Biflavonyls;Parsons,J.Nat.Prod.,56,(1993),46	Bosistoa	Rutaceae
Metabolite_10000	1212.63	1212.63	-0.717079	C00032247	Sublanceoside L6;(-)-Sublanceoside L6	C61H96O24	Cynanchum sublanceolatum	Warashina,Chem.Pharm.Bull.,54,(2006),1551	Cynanchum	Apocynaceae
Metabolite_7667	651.262	651.268	8.50282	C00018369	Rifamycin Z	C35H41NO11	Nocardia mediterranea	Cricchio,J. Antibiotics,34,(1981),1257	Nocardia	Nocardiaceae
Metabolite_7666	651.232	651.232	-0.0735422	C00047304	Majusimine D;(-)-Majusimine D	C34H37NO12	Delphinium majus	Chen,J.Nat.Prod.,72,(2009),18	Delphinium	Ranunculaceae
Metabolite_4723	440.331	440.329	-3.81142	C00003539	Pfaffic acid	C29H44O3	Pfaffia paniculata	Harborne,Phytochemical Dictionary Second Edition,Taylor and Francis,(1999),Chapter53	Pfaffia	Amaranthaceae
Metabolite_4450	418.107	418.105	-3.51734	C00007164	8-Caffeoyl-3,4-dihydro-5,7-dihydroxy-4-phenylcoumarin	C24H18O7	Pityrogramma trifoliata	Harborne, The Handbook of Natural Flavonoids, 2, (1999), 115,Chalcones,dihydrochalcones and aurones;Dietz,Z.Naturforsch.C.,35,(1980),36	Pityrogramma	Pteridaceae
Metabolite_4881	450.112	450.108	-7.72731	C00020530	3-Chloro-9beta-hydroxy-8beta-(5-acetoxy-tiglinoyloxy)-dehydroleucodin	C22H23ClO8	Lasiolaena santosii	Bohlmann,Phytochem.,20,(1981),1613	Lasiolaena	Asteraceae
Metabolite_8075	684.357	684.362	8.1424	C00043157	14-Deacetyl-14-isobutyrylajadine;(+)-14-Deacetyl-14-isobutyrylajadine	C37H52N2O10	Delphinium scabriflorum	Shrestha,J.Nat.Prod.,67,(2004),1574	Delphinium	Ranunculaceae
Metabolite_5057	462.4	462.397	-6.10717	C00043568	Halicyclamine A	C32H50N2	Haliclona sp.	Blunt,Nat.Prod.Rep.,27,(2010),165	0	0
Metabolite_7359	632.07	632.065	-8.16326	C00042347	Castalin	C27H20O18	Castanea sativa Mill.	Lampire,Phytochem.,49,(1998),623	Castanea	Fagaceae
Metabolite_660	144.079	144.079	-2.63258	C00007420	alpha-Ketopantoate	C7H12O3	Arabidopsis thaliana	Ottenhof,Plant J.,37,(2004),61	Arabidopsis	Cruciferae
Metabolite_8069	684.268	684.263	-8.02058	C00035900	Yadanzioside E	C32H44O16	Brucea amarissima (Lour.) Desv.ex B.A.Gomes	Kim,Phytochem.,65,(2004),3167	Brucea	Simaroubaceae
Metabolite_8072	684.34	684.336	-6.89307	C00050228	Scupontin F;(-)-Scupontin F	C34H52O14	Scutellaria pontica	Rodriguez,J.Nat.Prod.,60,(1997),348	Scutellaria	Labiatae
Metabolite_3759	347.09	347.092	7.23794	C00026436	Haplobine	C18H18ClNO4	Haplophyllum obtusifolium	Bessonova,Khim.Prir.Soedin.,(1986),736	Haplophyllum	Rutaceae
Metabolite_3739	346.173	346.174	3.11304	C00018616	Acmimycin;Spenolimycin	C15H26N2O7	Bilvospiralis sp. nov. strain AB634D-177	Karwowski,J. Antibiotics,37,(1984),1513	0	0
Metabolite_3736	346.094	346.095	2.69695	C00024627	6-Iminosanguinarine	C20H14N2O4	Glaucium flavum Cr.var.vestitum	Castedo,Heterocycles,16,(1981),533	Glaucium	Papaveraceae
Metabolite_8088	685.329	685.326	-5.30968	C00018820	Tuberactinomycin N;Enviomycin	C25H43N13O10	Streptomyces griseoverticillatus var. tuberacticus N 6-130	Izumi,J. Antibiotics 24,(1971),680	Streptomyces	Streptomycetaceae
Metabolite_5080	464.325	464.329	8.23063	C00038849	Corticatic acid A	C31H44O3	Petrosia corticata	Nakao,J.Nat.Prod.,70,(2007),689	0	0
Metabolite_339	121.09	121.089	-6.39355	C00001426	Phenethylamine	C8H11N	Musa sapientum	Harborne,Phytochemical Dictionary Second Edition,Taylor and Francis,(1999),Chapter11	Musa	Musaceae
Metabolite_336	120.094	120.094	1.47247	C00035928	3,5-Nonadiyne	C9H12	Cachrys ferulacea	Dokovic,Chem.Pharm.Bull.,52,(2004),853	Cachrys	Apiaceae
Metabolite_3705	343.309	343.311	7.57537	C00028992	Senepodine B	C23H39N2	Lycopodium chinense	Hirasawa,Tetrahedron,59,(2003),3567	Lycopodium	Lycopodiaceae
Metabolite_3724	344.207	344.21	8.91673	C00007753	13alpha-Tigloyloxymultiflorine	C20H28N2O3	Lupinus hirsutus	Ohmiya,The Alkaloids,47,(1995),1,Lupine alkaloids;Takamatsu,J.Nat.Prod.,54,(1991),477	Lupinus	Fabaceae
Metabolite_8092	685.398	685.398	-0.54046	C00024046	3-Epidehydropachymic acid phthalimidomethyl ester	C42H55NO7	Poria cocos WOLF	Tai T.,Phytochem.,40,(1995),225-231	0	0
Metabolite_5073	464.119	464.117	-5.21005	C00049820	Mudanoside B;(-)-Mudanoside B	C18H24O14	Paeonia suffruticosa	Lin,J.Nat.Prod.,61,(1998),343	Paeonia	Paeoniaceae
Metabolite_3774	349.878	349.88	4.00292	C00010383	2-(Bromochloromethyl)-1,5,6-trichloro-6-methyl-1,3,7-octatriene	C10H11BrCl4	Plocamium cartilagineum	Crews,J.Org.Chem.,49,(1984),1371	0	0
Metabolite_5049	462.137	462.137	1.55229	C00049670	Sibiricose A3;(+)-Sibiricose A3	C19H26O13	Polygala sibirica	Miyase,J.Nat.Prod.,62,(1999),993	Polygala	Polygalaceae
Metabolite_7367	632.269	632.268	-2.2187	C00030148	Dipsanoside G	C29H44O15	Dipsacus asper	Tian,Chem.Pharm.Bull.,55,(2007),1677	Dipsacus	Dipsacaceae/Diervillaceae/Linnaeaceae/Valerianaceae
Metabolite_8051	683.152	683.146	-9.4705	C00006916	Delphinidin 3-(6''-malonylsambubioside)	C29H31O19	Ranunculus asiaticus	Harborne, The Handbook of Natural Flavonoids, 2, (1999), 1,Anthocyanins;Toki,Phytochem.,42,(1996),1055	Ranunculus	Ranunculaceae
Metabolite_7365	632.24	632.241	2.36394	C00008101	Mulberrofuran E	C39H36O8	Morus alba	Harborne, The Handbook of Natural Flavonoids, 2, (1999), 115,Chalcones,dihydrochalcones and aurones;Ueda,Chem.Pharm.Bull.,32,(1984),350;Hano,Heterocycles,27,(1988),2315	Morus	Moraceae
Metabolite_5033	461.205	461.205	-0.989958	C00028308	Glucoerysodine	C24H31NO8	Erythrina lysistemon	Amer,J.Nat.Prod.,54,(1991),161	Erythrina	Fabaceae
Metabolite_8046	682.405	682.408	4.63052	C00034657	Rubescensin M	C40H58O9	Isodon rubescens var.rubescens	Huang,Phytochem.,68,(2007),616	Isodon	Labiatae
Metabolite_8036	682.336	682.335	-0.602501	C00029581	6'-O-(E-4-Hydroxycinnamoyl)-desglucouzarin	C38H50O11	Asclepias curassavica L.	Warashina,Chem.Pharm.Bull.,56,(2008),1159	Asclepias	Apocynaceae
Metabolite_5026	460.419	460.414	-9.79822	C00028267	Felipealbizine B	C28H52N4O	Albizzia inopinata	Assis,Acta Farm.Bonaerense,18,(1999),271	Albizzia	Fabaceae
Metabolite_3806	353.144	353.147	8.85904	C00017253	AB 3217A;AB3217-A;Antibiotic AB3217A	C17H23NO7	Streptomyces platensis AB3217	Kanbe,J.Antibiotics 45,(1992),458	Streptomyces	Streptomycetaceae
Metabolite_3804	353.104	353.107	9.33993	C00028380	Hyrtiomanzamine	C18H17N4O2S	Hyrtios erecta	Bourguet-Kondracki,Tetrahedron Lett.,37,(1996),3457	0	0
Metabolite_3789	352.077	352.076	-5.21616	C00026647	Discorhabdin L	C18H14N3O3S	Latrunculia brevis	Rayes,J.Nat.Prod.,67,(2004),463	0	0
Metabolite_8054	683.389	683.388	-1.38612	C00017210	Mycinamicin XV;Mycinamycin XV	C35H57NO12	Micromonospora griseorubida FERM BP-705	Kinoshita,J.Antibiotics 45,(1992),1	Micromonospora	Micromonosporaceae
Metabolite_351	122.049	122.048	-8.28133	C00000209	Nicotinamide;Vitamin B	C6H6N2O	Pinellia pedatisecta	Qin,Zhongcaoyao,17,(1986),197	Pinellia	Araceae
Metabolite_5048	462.095	462.095	1.2089	C00017064	Antibiotic DC 116;Sapurimycin	C25H18O9	Streptomyces sp. DO-116	Kara,J.Antibiotics 44,(1991),33	Streptomyces	Streptomycetaceae
Metabolite_5042	462.052	462.056	8.69778	C00025534	Aranotin; Antibiotic A 21101-III	C20H18N2O7S2	Arachniotus aurens (Eidam)Schroeter	Nagarajan,J.Am.Chem.Soc.,90,(1968),2980	Arachniotus	Dryopteridaceae
Metabolite_5041	462.047	462.046	-1.53021	C00026535	Securamine G;(-)-Securamine G	C20H20BrClN4O2	Securiflustra securifrons	Rahbaek,J.Nat.Prod.,60,(1997),175	0	0
Metabolite_3703	343.128	343.129	4.58481	C00039971	Pestalamide B;(-)-Pestalamide B	C18H19N2O5	Pestalotiopsis theae	Ding,J.Nat.Prod.,71,(2008),1861	Pestalotiopsis	Amphisphaeriaceae
Metabolite_8159	693.315	693.315	0.126643	C00030727	Manshuritine	C38H47NO11	Aconitum manshuricum	Ishimi,J.Nat.Med.,60,(2006),255	Aconitum	Ranunculaceae
Metabolite_3606	335.076	335.073	-8.58362	C00026648	Discorhabdin I;(+)-(6S,8S)-Discorhabdin I; (+)-Discorhabdine I	C18H13N3O2S	Latrunculia brevis	Rayes,J.Nat.Prod.,67,(2004),463	0	0
Metabolite_3605	335.044	335.041	-8.67359	C00007447	Nicotinate mononucleotide;Nicotinic acid mononucleotide;Nicotinic acid ribonucleotide	C11H14NO9P	Arabidopsis thaliana	Hunt,New Phytologist,163,(2004),31	Arabidopsis	Cruciferae
Metabolite_8167	693.405	693.409	5.31892	C00028297	Germerine	C37H59NO11	Veratrum lobelianum	Jia,Lanzhou Daxue Xuebao,19,(1983),203	Veratrum	Melanthiaceae
Metabolite_8158	693.278	693.279	0.2918	C00016682	Altromycin I	C37H43NO12	AB 1246E-26 (NRRL 18371)	Brill,J. Antibiotics,47,(1994),1160	0	0
Metabolite_8139	690.322	690.325	4.66177	C00015500	CRM 646A	C36H50O13	Acremonium sp. MT70646	Ko,J.Antibiotics 53,(2000),211	Acremonium	Hypocreaceae
Metabolite_3637	336.921	336.923	6.72488	C00042899	Pyrrolomycin I	C12H7Cl4NO2	Streptomyces fumanus	Charan,J.Nat.Prod.,68,(2005),277	Streptomyces	Streptomycetaceae
Metabolite_3615	336.011	336.013	5.83758	C00011928	[1S-[1a(Z),3a,4b]]-3-(3-Bromo-4-chloro-4-methylcyclohexyl)-4-oxo-2-pentenoic acid methyl ester	C13H18BrClO3	Laurencia caespitosa	Estrada,Tetrahedron Lett.,28,(1987),687	0	0
Metabolite_8168	693.422	693.424	2.51552	C00038220	27-Hydroxy-13,19-didesmethylspirolide C	C41H59NO8	Alexandrium ostenfeldii	Ciminiello,J.Nat.Prod.,70,(2007),1878	Alexandrium	Gonyaulacaceae
Metabolite_8170	693.626	693.627	2.02013	C00041564	Gracilamide A;(+)-Gracilamide A	C43H83NO5	Gracilaria asiatica	Sun,J.Nat.Prod.,69,(2006),1488	Gracilaria	Gracilariaceae
Metabolite_3588	334.2	334.199	-2.0055	C00031264	Sachaloside VI;(-)-Sachaloside VI	C16H30O7	Rhodiola sachalinensis	Nakamura,Chem.Pharm.Bull.,55,(2007),1505	Rhodiola	Crassulaceae
Metabolite_3561	332.203	332.2	-7.90714	C00049661	Nb-Desmethyl-meso-chimonanthine;(+)-Nb-Desmethyl-meso-chimonanthine	C21H24N4	Psychotria lyciiflora	Jannic,J.Nat.Prod.,62,(1999),838	Psychotria	Rubiaceae
Metabolite_3555	332.141	332.139	-6.8403	C00016238	Chlovalicin	C16H25ClO5	Sporothrix sp. FO-4649	Hayashi,J.Antibiotics 49,(1996),631	Sporothrix	Ophiostomataceae
Metabolite_5160	471.018	471.016	-4.29019	C00039037	Dispyrin	C18H23Br2N3O2	Agelas dispar	Piria,J.Nat.Prod.,70,(2007),613	0	0
Metabolite_8191	696.395	696.393	-3.61202	C00024690	Bismurrayafoline C	C46H52N2O4	Murraya euchrestifolia	Ito,Chem.Pharm.Bull.,39,(1991),2525	Murraya	Rutaceae
Metabolite_5144	469.176	469.174	-3.95739	C00047802	Chrotacumine D	C25H27NO8	Dysoxylum acutangulum	Ismail,J.Nat.Prod.,72,(2009),1879	Dysoxylum	Meliaceae
Metabolite_7305	626.294	626.294	0.0287549	C00032391	Tricalysioside D;(-)-Tricalysioside D	C31H46O13	Tricalysia dubia OHWI	Otuka,Chem.Pharm.Bull.,55,(2007),1600	Tricalysia	Rubiaceae
Metabolite_5154	470.213	470.209	-7.44239	C00015237	2,6-Bis(4-hydroxybenzyl-5,3'-dimethoxy-3-hydroxybibenzyl	C30H30O5	Bletilla striata	Takagi,Phytochem.,22,(1983),1011	Bletilla	Orchidaceae
Metabolite_3568	333.021	333.019	-7.20981	C00001465	Glucocapparin;Methyl glucosinolate	C8H15NO9S2	Cleome viscosa	Hasapis,Phytochem.,20,(1981),2355	Cleome	Capparaceae
Metabolite_5111	466.103	466.105	4.783	C00015871	Shoreaphenol	C28H18O7	Shorea robusta	Saraswathy,Phytochem.,31,(1992),2561	Shorea	Dipterocarpaceae
Metabolite_3653	338.148	338.148	0.777477	C00040125	Pyriferine B;(+)-Pyriferine B	C16H22N2O6	Pseudobaeospora pyrifera	Quang,J.Nat.Prod.,71,(2008),1620	Pseudobaeospora	Tricholomataceae
Metabolite_8118	687.339	687.341	1.90389	C00016283	Naphthomycinol	C40H49NO9	Streptomyces sp. PF7	Kim,J.Antibiotics 49,(1996),1172	Streptomyces	Streptomycetaceae
Metabolite_9887	1174.61	1174.6	-7.46083	C00017604	Janthinocin C	C57H82N12O15	Janthinobacterium lividum	O'Sullivan,J.Antibiotics,43,(1990),913	0	0
Metabolite_7337	628.162	628.164	2.58858	C00008714	Taxifolin 3-galactosyl-(1->6)-glucoside	C27H32O17	Crotalaria prostrata	Harborne, The Handbook of Natural Flavonoids, 2, (1999), 840,Flavanones and dihydroflavonols;Yadava,J.Indian Chem.Soc.,68,(1991),632	Crotalaria	Fabaceae
Metabolite_3700	343.088	343.085	-8.05707	C00000760	N-(7-Mercaptoheptanoyl)threonine phosphate	C11H22NO7PS	Methanobacterium formicicum	Taylor,J.Biol.Chem,249,(1974),4879	Methanobacterium	Methanobacteriaceae
Metabolite_8108	686.371	686.37	-1.3697	C00037837	Spergulin A;(+)-Spergulin A	C35H58O11S	Mollugo spergula	Sahu,Phytochem.,58,(2001),1177	Mollugo	Molluginaceae
Metabolite_3678	341.1	341.101	3.65599	C00016292	Pelagiomicin C	C17H15N3O5	Pelagiobacter variabilis	Imamura,J.Antibiotics 50,(1997),8	0	0
Metabolite_7331	627.492	627.498	8.58017	C00040104	Ptilomycalin D;(-)-Ptilomycalin D	C38H65N3O4	Monanchora dianchora	Bensemhoun,J.Nat.Prod.,70,(2007),2033	0	0
Metabolite_8130	688.177	688.179	2.73502	C00014532	6'''-Hydroxylophirone B 4'''-O-glucoside;(2S,3R)-Naringenin-(3beta,3)-4,2',4'-trihydroxychalcone 4'''-O-glucoside	C36H32O14	Ochna integerrima	Kaewamatawong,J.Nat.Prod.,65,(2002),1027	Ochna	Ochnaceae
Metabolite_8132	688.367	688.362	-7.04988	C00001698	Callichiline	C42H48N4O5	Callichilia barteria	Harborne,Phytochemical Dictionary Second Edition,Taylor and Francis,(1999),Chapter20	Callichilia	Apocynaceae
Metabolite_3663	340.019	340.017	-4.17725	C00049764	(-)-Agelastatin A	C12H13BrN4O3	Cymbastela sp.	Hong,J.Nat.Prod.,61,(1998),158	0	0
Metabolite_3664	340.075	340.073	-7.106	C00018349	Antibiotic Ab 650b;Antibiotic PA 31088IV;Asparenomycin A	C14H16N2O6S	Streptomyces tokunonensis sp. nov. PA-31088	Tanaka,J. Antibiotics,34,(1981),909	Streptomyces	Streptomycetaceae
Metabolite_3670	340.148	340.148	1.63703	C00017783	3,3'-Neotrehalosadiamine;BMY 28251	C12H24N2O9	K169B-91	Tsuno,J.Antibiotics,39,(1986),1001	0	0
Metabolite_8125	687.404	687.398	-8.83985	C00024407	Lycoriside	C38H57NO10	Crinum asiaticum L.	Ghosal,Phytochem.,24,(1985),2703	Crinum	Amaryllidaceae
Metabolite_8030	681.294	681.294	-0.0610141	C00019980	Neoacrimarine A	C40H43NO9	Citrus sp.	Takemura,Heterocycles,36,(1993),675	Citrus	Rutaceae
Metabolite_5020	460.218	460.216	-3.18075	C00045485	(2S)-2,6,10,14-tetramethylpentadeca-1,18-diyl sulfate	C19H40O8S2	Sidnyum turbinatum	Aiello,J.Nat.Prod.,64,(2001),219	Sidnyum	Polyclinidae
Metabolite_3823	354.039	354.038	-5.24309	C00016120	BM 2419-1;BM 2419-DP	C18H10O8	Paecilomyces sp. BM2419	Ishiyama,J.Antibiotics 51,(1998),1069	Paecilomyces	Trichocomaceae
Metabolite_4002	373.1	373.101	2.06992	C00001538	DIMBOA glucoside	C15H19NO10	Triticum aestivum	Harborne,Phytochemical Dictionary Second Edition,Taylor and Francis,(1999),Chapter16	Triticum	Poaceae
Metabolite_7409	635.328	635.332	5.78482	C00047428	Cotteslosin A	C34H45N5O7	Aspergillus versicolor	Fremlin,J.Nat.Prod.,72,(2009),666	Aspergillus	Trichocomaceae
Metabolite_7924	670.276	670.274	-3.20574	C00015981	NA 30851A;SW 163A	C34H42N2O12	Streptomyces sp. SNA15896	Takahashi,J.Antibiotics 54,(2001),867	Streptomyces	Streptomycetaceae
Metabolite_4022	374.115	374.111	-9.41592	C00001604	Portulacaxanthin II	C18H18N2O7	Portulaca grandiflora	Harborne,Phytochemical Dictionary Second Edition,Taylor and Francis,(1999),Chapter18	Portulaca	Portulacaceae/Montiaceae
Metabolite_4922	455.164	455.163	-1.33939	C00028315	Gymnastatin A	C23H31Cl2NO4	Gymnascella dankaliensis	Numata,Tetrahedron Lett.,38,(1997),5675	Gymnascella	Gymnoascaceae
Metabolite_7413	635.373	635.367	-8.77702	C00028298	Germidine	C34H53NO10	Veratrum lobelianum Bernh.	Bondarenko,Khim.Prir.Soedin.,(1971),854	Veratrum	Melanthiaceae
Metabolite_4938	456.202	456.2	-6.08572	C00031819	Glochidacuminoside C;(-)-Glochidacuminoside C	C22H32O10	Glochidion acuminatum	Otsuka,Chem.Pharm.Bull.,52,(2004),591	Glochidion	Phyllanthaceae
Metabolite_7948	671.289	671.294	7.67527	C00018358	30-Hydroxyrifamycin W	C35H45NO12	Amycolatopsis mediterranei R-12	Traxler,J. Antibiotics,34,(1981),971	Amycolatopsis	Pseudonocardiaceae
Metabolite_4934	456.173	456.169	-8.77232	C00043300	Aspernigrin B	C27H24N2O5	Aspergillus niger	Hiort,J.Nat.Prod.,67,(2004),1532	Aspergillus	Trichocomaceae
Metabolite_3992	372.236	372.237	3.88627	C00027756	460A;CPI 4;Kojistatin A	C17H32N4O5	Aspergillus oryzae ATCC20386	Sato,Jpn.Kokai Tokkyo Koho (1997),JP08256784	Aspergillus	Trichocomaceae
Metabolite_4932	456.115	456.113	-4.35567	C00036043	Bazzanin A	C28H21ClO4	Bazzania trilobata	Speicher,Phytochem.,57,(2001),303	Bazzania	Lepidoziaceae
Metabolite_4933	456.124	456.127	5.3772	C00029702	Adicardin;Apiosylskimmin	C20H24O12	Angelica furcijuga KITAGAWA	Matsuda,Chem.Pharm.Bull.,53,(2005),387	Angelica	Apiaceae
Metabolite_7913	669.328	669.331	3.65517	C00018838	Tuberactinomycin O	C25H43N13O9	Streptomyces griseoverticillatus var. tuberacticus	Izumi,J. Antibiotics 25,(1972),201	Streptomyces	Streptomycetaceae
Metabolite_7903	668.361	668.356	-7.74388	C00039812	Myrtucommulone A;(+)-Myrtucommulone A	C38H52O10	Myrtus communis	Appendino,J.Nat.Prod.,65,(2002),334	Myrtus	Myrtaceae
Metabolite_7881	666.376	666.381	7.33079	C00018641	Lavendomycin;Antibiotic FR 900201	C29H50N10O8	Streptomyces lavendulae subsp. brasilicus	Komori,J. Antibiotics,38,(1985),691	Streptomyces	Streptomycetaceae
Metabolite_4096	382.091	382.09	-2.16376	C00015104	Chrysoqueen	C17H18O10	Chrysosporium queenslandicum IFM 51121	Ivanova,J.Antibiotics 55,(2002),914	0	0
Metabolite_4916	454.353	454.356	6.83424	C00025512	Holarrhesine	C29H46N2O2	Holarrhena floribunda	Hoyer,Planta Med.,34,(1978),47	Holarrhena	Apocynaceae
Metabolite_7912	669.315	669.315	-0.0182221	C00016622	31-Homorifamycin W	C36H47NO11	Amycolatopsis mediterranei	Wang,J.Antibiotics 47,(1994),613	Amycolatopsis	Pseudonocardiaceae
Metabolite_4042	376.105	376.105	0.122852	C00017537	Altemicidin;Artemicidin;Artemicidine	C13H20N4O7S	Streptomyces sioyaensis SA-1758	Takahashi,J.Antibiotics,42,(1989),1556	Streptomyces	Streptomycetaceae
Metabolite_4045	376.162	376.163	4.81962	C00023942	Diacetylfusarochromanone;2,2-Dimethyl-5-amino-6-(3'-N-acetyl-4'-O-acetylbutyryl)-4-chromone	C19H24N2O6	Fusarium equiseti	Mirocha,J.Nat.Prod.,54,(1991),1165-1167	0	0
Metabolite_4044	376.146	376.142	-9.34861	C00040674	Xanthocillin Y2	C22H20N2O4	Penicillium notatum	Isaka,J.Nat.Prod.,70,(2007),656	Penicillium	Trichocomaceae
Metabolite_7951	671.338	671.335	-4.10207	C00029169	Ulongamide D	C34H49N5O7S	Lyngbya sp. NIH309	Luesch,J.Nat.Prod.,65,(2002),996	0	0
Metabolite_8002	678.258	678.252	-8.33447	C00014006	Wanepimedoside A;8-(3''-Hydroxy-3''-methylbutyl)kaempferol 4'-methyl ether 3-rhamnosyl-(1->2)-rhamnoside;3-[[6-Deoxy-2-O-(6-deoxy-alpha-L-mannopyranosyl)-alpha-L-mannopyranosyl]oxy]-5,7-dihydroxy-8-(3-hydroxy-3-methylbutyl)-2-(4-methoxyphenyl)-4H-1-benzopyran-4-one	C33H42O15	Epimedium wushanense	Li,Phytochem.,43,(1996),527	Epimedium	Berberidaceae
Metabolite_3869	359.033	359.034	4.87157	C00001488	Sinigrin;2-Phenylethyl glucosinolate;Allyl glucosinolate	C10H17NO9S2	Thelypodium laciniatum	Al-Shehbaz,Contribution,Gray Herbarium Harvard Univ.,204,(1973),3	Thelypodium	Cruciferae
Metabolite_4998	460.088	460.089	0.89822	C00016109	(+)-5-Bromoochrephilone;5-Bromoochrephilone	C23H25BrO5	Penicillium multicolor FO-2338	Matsuzaki,J.Antibiotics 51,(1998),1004	Penicillium	Trichocomaceae
Metabolite_4990	459.222	459.226	8.22878	C00018701	(-)-Lankacidin C;Antibiotic T 2636C;Bundlin A;Lankacidin C;NSC 145118;T 2636C	C25H33NO7	Streptomyces griseofuscus nov. sp.	Marie,J. Antibiotics Series A,15,(1962),98	Streptomyces	Streptomycetaceae
Metabolite_636	143.057	143.058	7.12726	C00018434	(+)-SQ 26517;SQ 26517	C6H9NO3	Bacillus sp. 11,480	Parker,J. Antibiotics,35,(1982),900	Bacillus	Bacillaceae
Metabolite_7388	634.337	634.335	-2.38219	C00050385	Manauealide C	C34H50O11	Gracilaria coronopifolia	Nagai,J.Nat.Prod.,60,(1997),925	Gracilaria	Gracilariaceae
Metabolite_3889	360.216	360.217	3.49762	C00025028	Vakhmadine	C21H30NO4	Aconitum palmatum	Jiang,J.Nat.Prod.,54,(1991),525	Aconitum	Ranunculaceae
Metabolite_3846	356.076	356.08	9.50163	C00028561	Malasseziazole B	C21H12N2O4	Malassezia furfur CBS1878	Mayser,Antonie van Leeuwenhoek,84,(2003),185;Kramer,ChemBioChem.,6,(2005),2290;Irlinger,Helv.Chim.Acta,88,(2005),1472	0	0
Metabolite_357	122.109	122.11	2.67709	C00037789	Santene	C9H14	Rhodiola rosea L.	Rohloff,Phytochem.,59,(2002),655	Rhodiola	Crassulaceae
Metabolite_8023	680.354	680.353	-1.41249	C00027811	Aeruginosin 103-A	C35H48N6O8	Microcystis viridis	Kodani,J.Nat.Prod.,61,(1998),1046	0	0
Metabolite_5012	460.181	460.185	7.04573	C00044482	7beta-Hydroxycatuabine F	C23H28N2O8	Erythroxylum vacciniifolium	Zanolari,J.Nat.Prod.,66,(2003),497	Erythroxylum	Erythroxylaceae
Metabolite_3843	355.288	355.288	-0.306057	C00025487	Cyclobuxophylline O	C24H37NO	Buxus sempervirens	Huong,Collect.Czech.Chem.Commun.,46,(1981),1425	Buxus	Buxaceae
Metabolite_8018	680.272	680.268	-6.03117	C00049545	Azadirachtin N	C33H44O15	Azadirachta indica	Luo,J.Nat.Prod.,62,(1999),1022	Azadirachta	Meliaceae
Metabolite_4982	459.189	459.187	-5.42691	C00007252	5-Methyl-tetrahydrofolate;5-Methyltetrahydrofolic acid	C20H25N7O6	Arabidopsis thaliana	Hanson,Annu.Rev.Plant Physiol.Plant.Mol.Biol.,52,(2001),119	Arabidopsis	Cruciferae
Metabolite_7989	676.27	676.273	4.11456	C00042042	11-epi-Azadirachtin D;(-)-11-epi-Azadirachtin D	C34H44O14	Azadirachta indica	Ramji,Phytochem.,49,(1998),265	Azadirachta	Meliaceae
Metabolite_7986	675.303	675.298	-8.41844	C00015601	Argifin;FTD 0668	C29H41N9O10	Gliocladium sp. FTD-0668	Omura,J.Antibiotics 53,(2000),603	Gliocladium	Hypocreaceae
Metabolite_4958	458.186	458.184	-4.91416	C00025954	Neotrilobine;(-)-Neotrilobine	C27H26N2O5	Cocculus trilobus DC.	Chen,Chin.Chem.Lett.,5,(1994),385	Cocculus	Menispermaceae
Metabolite_3934	365.274	365.272	-6.73143	C00029040	(+)-Spirofornabuxine	C25H35NO	Buxus sempevirens (L.)	Abramson,Phytochem.,16,(1977),1935	Buxus	Buxaceae
Metabolite_3932	365.198	365.199	1.83513	C00024703	Euchrestine E	C23H27NO3	Murraya euchrestifolia	Ito,Chem.Pharm.Bull.,39,(1991),2525	Murraya	Rutaceae
Metabolite_3929	365.022	365.02	-6.51407	C00034505	Eudistomidin C	C15H16BrN3OS	Eudistoma glaucus	Martinez-Luis,Phytochem.,68,(2007),1882	Eudistoma	Clavelinidae
Metabolite_3947	367.138	367.135	-7.28854	C00029122	Tintamine	C20H21N3O2S	Cystodytes violatinctus	Koren-Goldshlager,J.Org.Chem.,63,(1998),4601	Cystodytes	Clavelinidae
Metabolite_7399	634.378	634.373	-8.02082	C00048896	Unnarmicin A;(+)-Unnarmicin A	C36H50N4O6	Photobacterium sp.	Blunt,Nat.Prod.Rep.,27,(2010),165	Photobacterium	Vibrionaceae
Metabolite_3950	367.147	367.148	3.60204	C00036887	Casuarine 6-O-alpha-D-glucopyranoside	C14H25NO10	Casuarina equisetifolia	Wawtson,Phytochem.,56,(2001),265	Casuarina	Casuarinaceae
Metabolite_10099	1242.73	1242.73	-1.61488	C00032851	Colopsinol E	C65H110O20S	Amphidinium sp.	Kubota,Chem.Pharm.Bull.,48,(2000),1447	Amphidinium	Gymnodiniaceae
Metabolite_3924	364.117	364.116	-2.21339	C00000280	Inumakilactone A	C18H20O8	Podocarpus macrophyllus	Kupchan,Experientia,31,(1978),137	Podocarpus	Podocarpaceae
Metabolite_7973	674.186	674.185	-2.43035	C00032712	Arabelline	C32H34O16	Haplophyllum patavinum	Innocenti,Chem.Pharm.Bull.,50,(2002),844	Haplophyllum	Rutaceae
Metabolite_4978	458.237	458.242	9.30357	C00026299	(+)-Sarodesmine;(3',4'5'-trimethoxybenzoyl)-13-oxylupanine;Sarodesmine	C25H34N2O6	Sarothamnus catalaunicus Webb.	Faugeras,C.R.Acad.Sci.D, 271,(1970),611	0	0
Metabolite_7977	674.297	674.294	-4.42239	C00003734	Trichilin A	C35H46O13	Trichilia roka	Harborne,Phytochemical Dictionary Second Edition,Taylor and Francis,(1999),Chapter58	Trichilia	Meliaceae
Metabolite_7974	674.259	674.263	5.92151	C00025776	Bisjatrorrhizine;Bijatrorrhizine	C40H38N2O8	Jateorhiza palmata Miers	Carvalhas,J.Chem.Soc.,Perkin Trans.,1,(1972),327	Jateorhiza	Menispermaceae
Metabolite_3919	363.312	363.314	5.52143	C00002266	Terminaline	C23H41NO2	Pachysandra terminalis	Harborne,Phytochemical Dictionary Second Edition,Taylor and Francis,(1999),Chapter29	Pachysandra	Buxaceae
Metabolite_3916	363.14	363.143	8.01854	C00026990	Kahakamide B	C17H21N3O6	Nocardiopsis dassonvillei	Schumacher,Tetrahedron Lett.,42,(2001),5133	0	0
Metabolite_5338	484.154	484.158	7.54467	C00033342	Rubinaphthin B;(-)-Rubinaphthin B	C22H28O12	Rubia yunnanensis	Liou,Chem.Pharm.Bull.,50,(2002),276	Rubia	Rubiaceae
Metabolite_2012	225.136	225.136	2.08732	C00001421	N-Methylmescaline	C12H19NO3	Anhalonium lewinii	Kapadia,J.Pharm.Sci.,57,(1968),2017	0	0
Metabolite_1656	205.097	205.095	-7.8059	C00036886	Casuarine;(+)-Casuarine	C8H15NO5	Eugenia jambolana	Wawtson,Phytochem.,56,(2001),265	Eugenia	Myrtaceae
Metabolite_5684	512.248	512.247	-2.40545	C00037123	Ethyl 3-hydroxyoctanoate 3-O-beta-D-glucopyranosyl-(1->6)-beta-D-glucopyranoside	C22H40O13	Physalis peruviana	Mayorga,Phytochem.,59,(2002),439	Physalis	Solanaceae
Metabolite_8984	914.199	914.191	-8.8223	C00009121	[Gallocatechin-(4alpha->8)]2-gallocatechin	C45H38O21	Cistus incanus	Harborne, The Handbook of Natural Flavonoids, 2, (1999), 355,Flavans and proanthocyanidins;Brandon,Phytochem.,21,(1982),2953;Cai,Phtyochem.,30,(1991),2033	Cistus	Cistaceae
Metabolite_6748	598.294	598.299	7.69412	C00030315	Forskoditerpenoside D;(-)-Forskoditerpenoside D	C30H46O12	Coleus forskohlii WILLD.BRIQ.	Shan,Chem.Pharm.Bull.,56,(2008),52	Coleus	Lamiaceae
Metabolite_1643	204.137	204.136	-1.78519	C00036344	(3E)-3,7-Dimethyl-3-octene-1,2,6,7-tetrol;(-)-(3E)-3,7-Dimethyl-3-octene-1,2,6,7-tetrol	C10H20O4	Passiflora quadrangularis	Osorio,Phytochem.,53,(2000),97	Passiflora	Passifloraceae
Metabolite_2661	270.074	270.071	-7.67622	C00015246	Micrandrol C;2,6-Dihydroxy-7-methyl-1-methylthiophenanthrene	C16H14O2S	Micrandropsis scleroxylon	De Alvarenga,Phytochem.,13,(1974),1283;De Alvarenga,Phytochem.,20,(1981),1159	Micrandropsis	Euphorbiaceae
Metabolite_1043	170.021	170.022	1.17488	C00002647	Gallic acid	C7H6O5	Sarcolaeana multiflora	Paris,Plant Med.Phytother.,9,(1975),230	0	0
Metabolite_1662	206.024	206.025	4.40165	C00034233	Se-Methylselenomethionine	C6H14NO2Se	Aspergillus fumigatus	Rezanka,Phytochem.,69,(2008),585	Aspergillus	Trichocomaceae
Metabolite_2639	268.146	268.146	1.51535	C00031852	Heudelotinone	C18H20O2	Trigonostemon chinensis	Zhu,J.Nat.Prod.,73,(2010),40	Trigonostemon	Euphorbiaceae
Metabolite_2638	268.106	268.106	-1.12609	C00044658	Corynecin II	C12H16N2O5	Streptomyces venezuelae	Lewis,J.Nat.Prod.,66,(2003),62	Streptomyces	Streptomycetaceae
Metabolite_5692	513.245	513.249	7.6575	C00017683	Phoslactomycin B	C25H40NO8P	Streptomyces nigrescens SC-273	Fushimi,J.Antibiotics,42,(1989),1019	Streptomyces	Streptomycetaceae
Metabolite_6913	608.405	608.408	4.54625	C00046484	Ulmicin A;(-)-Ulmicin A	C38H56O6	Ulmus davidiana var.japonica	Lee,J.Nat.Prod.,64,(2001),328	Ulmus	Ulmaceae
Metabolite_8711	796.505	796.497	-9.0787	C00050061	Dolabelide C;(+)-Dolabelide C	C43H72O13	Dolabella auricularia	Suenaga,J.Nat.Prod.,60,(1997),155	0	0
Metabolite_5679	511.408	511.412	8.82213	C00049522	Stellettazole B	C30H51N6O	Stelletta sp.	Matsunaga,J.Nat.Prod.,62,(1999),1202	Stelletta	Ancorinidae
Metabolite_2695	274.098	274.099	6.77179	C00037844	Sterequinone A	C19H14O2	Stereospermum personatum	Kumar,Phytochem.,63,(2003),925	Stereospermum	Bignoniaceae
Metabolite_8691	794.32	794.324	5.24209	C00028810	Patellamide G	C38H50N8O7S2	Lissoclinum patella	Fu,J.Nat.Prod.,61,(1998),1547	0	0
Metabolite_7067	614.341	614.345	7.42196	C00043664	Lasonolide E;(-)-Lasonolide E	C35H50O9	Forcepia sp.	Wright,J.Nat.Prod.,67,(2004),1351	0	0
Metabolite_5658	508.218	508.221	5.17067	C00015941	Asukamycin B-II	C28H32N2O7	Streptomyces nodosus subsp. asukaensis	Hu,J.Antibiotics 54,(2001),340	Streptomyces	Streptomycetaceae
Metabolite_918	160.125	160.125	2.35417	C00021250	Trinoranastreptene	C12H16	Calypogeia granulata	Takeda,Bull. Chem. Soc. Jpn.,56,(1983),1265	Calypogeia	Calypogeia
Metabolite_1628	204.047	204.047	-0.331696	C00010415	2,6-Dichloro-7-methyl-3-methylene-1,6-octadiene	C10H14Cl2	Chondrococcus hornemannii	Burreson,Tetrahedron Lett.,(1975),2155	Chondrococcus	Rubiaceae
Metabolite_6739	597.421	597.424	5.76528	C00028184	Didemniserinolipid A	C33H59NO8	Didemnum sp.	Gonzalez,J.Org.Chem.,64,(1999),5705	Didemnum	Didemnidae
Metabolite_1633	204.075	204.075	-0.990026	C00016855	Trehalamine	C7H12N2O5	Micromonospora sp. SANK 62390	Ando,J. Antibiotics,46,(1993),1116	Micromonospora	Micromonosporaceae
Metabolite_2686	273.084	273.086	5.48095	C00002281	Brugine	C12H19NO2S2	Bruguiera exaristata	Harborne,Phytochemical Dictionary Second Edition,Taylor and Francis,(1999),Chapter30	Bruguiera	Rhizophoraceae
Metabolite_5671	510.334	510.335	1.96152	C00016269	Leptofuranin C	C32H46O5	Streptomyces tanashiensis 3007-H1	Hayakawa,J.Antibiotics 49,(1996),974	Streptomyces	Streptomycetaceae
Metabolite_6741	598.252	598.257	8.09793	C00003492	Tinyatoxin	C36H38O8	Euphorbia lactea	Baslas,Herba Hung.,75,(1986),49	Euphorbia	Euphorbiaceae
Metabolite_5676	511.218	511.221	4.87752	C00041746	Pervilleine E;(+)-Pervilleine E	C28H33NO8	Erythroxylum pervillei	Chin,J.Nat.Prod.,69,(2006),414	Erythroxylum	Erythroxylaceae
Metabolite_9288	968.412	968.419	7.24113	C00024092	Mahagonin	C54H64O16	Swietenia mahagoni JACQ.	Kadota S.,Tetrahedron Lett.,31,(1990),5943-5946	Swietenia	Meliaceae
Metabolite_9290	970.432	970.441	8.89879	C00032755	Basellasaponin A;(+)-Basellasaponin A	C47H70O21	Basella rubra L.	Murakami,Chem.Pharm.Bull.,49,(2001),776	Basella	Basellaceae
Metabolite_1638	204.092	204.092	-2.52853	C00037428	Longifone;(+)-Longifone	C10H17ClO2	Mentha longifolia	Ali,Phytochem.,59,(2002),889	Mentha	Labiatae
Metabolite_923	161.106	161.105	-3.29099	C00017741	Deoxyvalidamine	C7H15NO3	Streptomyces hygroscopicus subsp. limoneus (IFO 12703, ATCC 21431, FERM-P 468)	Kameda,J.Antibiotics,38,(1985),1816	Streptomyces	Streptomycetaceae
Metabolite_6303	568.315	568.32	9.48124	C00025187	Longicaudatine;NSC 377102	C38H40N4O	Strychnos ignatti Berg.	Pingsuthiwong,M.S.Thesis,Fac.Pharm.Sci.,Chulalongkorn Univ.Bangkok,(1986).	Strychnos	Longaniaceae
Metabolite_5704	514.317	514.316	-2.72803	C00028129	Daechuine S7;(-)-Daechuine S7	C28H42N4O5	Zizyphus jujuba var.inermis	Han,Pure Appl.Chem.,61,(1989),443	0	0
Metabolite_8762	802.131	802.134	4.69631	C00003405	Atractyloside	C30H44K2O16S2	Xanthium mongolicum	Wang,Zhongcaoyao,14,(1983),529	Xanthium	Asteraceae
Metabolite_5731	516.262	516.257	-8.64187	C00045921	Eriojaposide B;(+)-Eriojaposide B	C25H40O11	Eriobotrya japonica	Ito,J.Nat.Prod.,64,(2001),737	Eriobotrya	Rosaceae
Metabolite_2600	265.117	265.117	0.24832	C00018741	(-)-Aristeromycin;1'a-Carbaadenosine;Aristeromycin;Cycloadenosine;NSC 103526	C11H15N5O3	Streptomyces citricolor nov. sp.	Kusaka,J. Antibiotics 21,(1968),255	Streptomyces	Streptomycetaceae
Metabolite_2599	265.096	265.095	-4.53027	C00015084	Nigerloxin	C13H15NO5	Aspergillus niger CFR-W-105	Sekhar,J.Antibiotics 55,(2002),789	Aspergillus	Trichocomaceae
Metabolite_8760	800.105	800.107	2.24849	C00002916	3,5-Di-galloyl-4-O-digalloylquinic acid	C35H28O22	Rhus semialata	Harborne,Phytochemical Dictionary Second Edition,Taylor and Francis,(1999),Chapter45	Rhus	Anacardiaceae
Metabolite_931	162.034	162.035	8.27826	C00007476	5-(Methylthio)-2-oxo-pentanoic acid	C6H10O3S	Arabidopsis thaliana	Textor,Planta,218,(2004),1026	Arabidopsis	Cruciferae
Metabolite_2567	264.094	264.092	-8.39122	C00029488	3beta-Chlorodehydrocostuslactone	C15H17ClO2	Laurus nobilis	Dall'Acqua,Chem.Pharm.Bull.,54,(2006),1187	Laurus	Lauraceae
Metabolite_2566	264.067	264.068	5.19881	C00028791	Pallidin	C11H12N4O2S	Rhaphisia pallida	Su,J.Nat.Prod.,59,(1996),504	0	0
Metabolite_945	162.071	162.071	0.165809	C00000772	7-Mercaptoheptanoic acid;7-Thioheptanoic acid	C7H14O2S	Methanococcus thermophila	White,Biochemistry,33,(1994),7077	Methanococcus	Methanococcaceae
Metabolite_2568	264.103	264.103	1.97245	C00007653	2-(6'-Methylthio)hexylmalic acid	C11H20O5S	Arabidopsis thaliana	Textor,Planta,218,(2004),1026	Arabidopsis	Cruciferae
Metabolite_8767	808.463	808.461	-2.49445	C00036896	Chikusetsusaponin IVa methyl ester;Silphioside A	C43H68O14	Brassia muricata	Kamel,Phytochem.,57,(2001),1259	Brassia	Orchidaceae
Metabolite_2601	265.122	265.123	2.38093	C00030789	Monaspiloindole	C18H17O2	Monascus pilosus BCRC38072	Cheng,Chem.Pharm.Bull.,56,(2008),394	Monascus	Elaphomycetaceae
Metabolite_63	92.0622	92.0626	4.09186	C00035779	1,5-Heptadien-3-yne	C7H8	Lycopersicon esculentum Mill.	Hong,Phytochem.,65,(2004),159	Lycopersicon	Solanaceae
Metabolite_9265	966.089	966.097	8.61426	C00049290	Rhoipteleanin H;Carpinerin B	C42H30O27	Rhoiptelea chiliantha	Jiang,J.Nat.Prod.,62,(1999),425	Rhoiptelea	Rhoipteleaceae
Metabolite_8738	798.128	798.128	-0.457975	C00032670	6-O-(E)-Caffeoyl-1,3,4-tri-O-galloyl-beta-D-glucopyranose	C36H30O21	Balanophora japonica	Jiang,Chem.Pharm.Bull.,49,(2001),887	Balanophora	Balanophoraceae
Metabolite_5962	535.16	535.158	-3.85858	C00007834	11-(Methylsulfinyl)undecyl glucosinolate	C19H37NO10S3	Camelina microcarpa	Daxenbichler,Phytochem.,30,(1991),2623	Camelina	Cruciferae
Metabolite_2615	266.041	266.043	5.74768	C00015071	Kynapcin 13	C12H10O7	Polyozellus multiplex	Kim,J.Antibiotics 55,(2002),623	Polyozellus	Thelephoraceae
Metabolite_6144	554.278	554.273	-9.763	C00031276	Salviadienol B	C28H42O11	Salvia chinensis	Wang,Chem.Pharm.Bull.,56,(2008),843	Salvia	Labiatae
Metabolite_86	97.9777	97.9769	-8.4558	C00007408	Phosphate	H3O4P	Arabidopsis thaliana	Fiehn,Anal.Chem.,72,(2000),3573	Arabidopsis	Cruciferae
Metabolite_2612	265.156	265.158	7.06779	C00001694	Brevicolline	C17H19N3	Carex brevicollis	Harborne,Phytochemical Dictionary Second Edition,Taylor and Francis,(1999),Chapter20	Carex	Cyperaceae
Metabolite_2232	239.142	239.142	1.77307	C00025768	Anatalline	C15H17N3	Nicotiana tabacum	Lockwood,Plant Cell Rep.,3,(1984),109	Nicotiana	Solanaceae
Metabolite_2704	274.251	274.251	-0.833532	C00007436	1,7,16-Hexadecanetriol	C16H34O3	Arabidopsis thaliana	Bonaventure,Plant J.,40,(2004),920	Arabidopsis	Cruciferae
Metabolite_6135	553.159	553.158	-0.565542	C00016573	Amidepsine B;FO 2942B	C28H27NO11	Humicola sp. FO-2942	Tomoda,J.Antibiotics 48,(1995),937	0	0
Metabolite_6889	608.326	608.332	9.71448	C00026878	Microcin SF608	C32H44N6O6	Microcystis aeruginosa	Banker,Tetrahedron,55,(1999),10835	0	0
Metabolite_2777	278.041	278.043	6.57858	C00034077	Nepenthone A	C13H10O7	Ancistrocladus abbreviatus	Bringmann,Phytochem.,69,(2008),2501	Ancistrocladus	Ancistrocladaceae
Metabolite_2782	278.053	278.055	6.94466	C00047215	Dithyreanitrile	C13H14N2OS2	Dithyrea wislizenii	Powell,J.Nat.Prod.,72,(2009),516	Dithyrea	Cruciferae
Metabolite_6393	579.142	579.138	-7.85353	C00017044	Benanomicin C;Pradimicin N	C29H25NO12	Actinomadura hibisca P157-2	Sawada,J.Antibiotics 43,(1990),1367	Actinomadura	Thermomonosporaceae
Metabolite_2789	278.105	278.106	1.81283	C00037439	Luotonin D	C17H14N2O2	Peganum nigellastrum	Ma,Phytochem.,53,(2000),1075	Peganum	Nitrariaceae
Metabolite_9632	1092.17	1092.17	-4.48487	C00009023	Leucodelphinidin 4-O-[2,4-bisgalloyl-6-(3-galloylgalloyl)-beta-D-glucopyranoside]	C49H40O29	Acacia leucophloea	Harborne, The Handbook of Natural Flavonoids, 2, (1999), 355,Flavans and proanthocyanidins;Trivedi,Curr.Sci.,53,(1984),367	Acacia	Fabaceae
Metabolite_40	85.0898	85.0891	-7.92334	C00028706	N-Methylpyrrolidine	C5H11N	Arisarum vulgare Targ.	Melhaoui,Planta Med.,64,(1998),476	Arisarum	Araceae
Metabolite_5988	539.264	539.263	-0.691665	C00024521	Bannucine	C29H37N3O7	Catharanthus roseus	Atta-ur-Rahman,J.Chem.Soc.,Perkin Trans.,1,(1986),923	Catharanthus	Apocynaceae
Metabolite_6383	578.178	578.179	1.19038	C00033915	Heteroclitin J;(-)-Heteroclitin J	C31H30O11	Kadsura heteroclita	Pu,Phytochem.,69,(2008),1266	Kadsura	Schisandraceae
Metabolite_6389	578.294	578.294	-0.314703	C00031612	Atractyloside G 2-O-beta-D-glucopyranoside	C27H46O13	Atractylodes lancea	Kitajima,Chem.Pharm.Bull.,51,(2003),673	Atractylodes	Asteraceae
Metabolite_2773	277.15	277.15	-1.40161	C00038559	Axinisothiocyanate L;(-)-Axinisothiocyanate L	C16H23NOS	Axinyssa sp.	Zubia,J.Nat.Prod.,71,(2008),608	Axinyssa	Demospongiae
Metabolite_6395	579.145	579.15	9.54464	C00006756	Pelargonidin 3-p-coumarylglucoside	C30H27O12	Urginea maritima	Harborne, The Handbook of Natural Flavonoids, 2, (1999), 1,Anthocyanins;Vega,Phytochem.,11,(1972),2896;Strack,Z.Naturforsch.C.,35,(1980),533	Urginea	Hyacinthaceae
Metabolite_1539	197.068	197.069	2.96495	C00001357	L-Dopa	C9H11NO4	Mucuna sloanei	Rai,Curr.Sci.,46,(1977),778	Mucuna	Fabaceae
Metabolite_9662	1106.59	1106.59	-0.21179	C00040592	Tyrianthin 4;(-)-Tyrianthin 4	C54H90O23	Ipomoea tyrianthina	Miron-Lopez,J.Nat.Prod.,70,(2007),557	Ipomoea	Convolvulaceae
Metabolite_10193	1270.71	1270.71	1.4014	C00034113	Periplocoside E	C65H106O24	Periploca forrestii Schltr.	Feng,Phytochem.,69,(2008),2716	Periploca	Apocynaceae
Metabolite_8631	783.21	783.214	4.36139	C00006772	Pelargonidin 3-(6''-p-coumarylglucoside)-5-(6'''-acetylglucoside)	C38H39O18	Hyacinthus orientalis	Harborne, The Handbook of Natural Flavonoids, 2, (1999), 1,Anthocyanins;Hosokawa,Phytochem.,40,(1995),567	Hyacinthus	Hyacinthaceae
Metabolite_8628	783.092	783.093	1.79268	C00038890	Cyclocinamide B	C29H32BrCl2N9O8	Corticium sp.	Laird,J.Nat.Prod.,70,(2007),741	Corticium	Corticiaceae
Metabolite_9569	1064.52	1064.52	-1.23429	C00042195	Acutanguloside C;(+)-Acutanguloside C	C54H80O21	Barringtonia acutangula	Mills,J.Nat.Prod.,68,(2005),311	Barringtonia	Lecythidaceae
Metabolite_2787	278.12	278.119	-4.77855	C00007650	2-(7'-Methylthio)heptylmalic acid	C12H22O5S	Arabidopsis thaliana	Textor,Planta,218,(2004),1026	Arabidopsis	Cruciferae
Metabolite_5995	540.131	540.127	-7.67841	C00038030	Yunnaneic acid D	C27H24O12	Salvia yunnanensis	Lu,Phytochem.,59,(2002),117	Salvia	Labiatae
Metabolite_7091	616.438	616.434	-6.68243	C00047113	Tsugarioside B;(+)-Tsugarioside B	C37H60O7	Ganoderma tsugae	Su,J.Nat.Prod.,63,(2000),514	Ganoderma	Ganodermataceae
Metabolite_9744	1128.57	1128.57	3.11506	C00041351	Argeloside L;(-)-Argeloside L	C56H88O23	Solenostemma argel	Perrone,J.Nat.Prod.,69,(2006),50	Solenostemma	Apocynaceae
Metabolite_5986	539.238	539.235	-5.39733	C00015481	Pyrronamycin A	C23H29N11O5	Streptomyces sp. KY11768	Asai,J. Antibiotics,53,(2000),66	Streptomyces	Streptomycetaceae
Metabolite_1563	199.084	199.084	2.6841	C00018799	Anticapsin;NSC 177854	C9H13NO4	Streptomyces griseoplanus NRRL 3507	Shah,J. Antibiotics 23,(1970),613	Streptomyces	Streptomycetaceae
Metabolite_5634	505.203	505.2	-7.18569	C00028317	Gymnastatin C	C24H37Cl2NO6	Gymnascella dankaliensis	Numata,Tetrahedron Lett.,38,(1997),5675	Gymnascella	Gymnoascaceae
Metabolite_2727	276.113	276.115	9.07668	C00033502	(1E,6E)-1,7-Diphenyl-1,6-heptadiene-3,5-dione	C19H16O2	Kaempferia parviflora	Azuma,Phytochem.,69,(2008),2743	Kaempferia	Zingiberaceae
Metabolite_9129	950.109	950.103	-6.83338	C00044999	Paeonianin E	C42H30O26	Paeonia lactiflora	Tanaka,J.Nat.Prod.,66,(2003),759	Paeonia	Paeoniaceae
Metabolite_119	101.121	101.12	-8.64377	C00001413	Hexylamine	C6H15N	Helleborus foetidus	Harborne,Phytochemical Dictionary Second Edition,Taylor and Francis,(1999),Chapter11	Helleborus	Ranunculaceae
Metabolite_5629	504.266	504.262	-6.54674	C00041539	Gelsebanine;(-)-Gelsebanine	C30H36N2O5	Gelsemium elegans	Xu,J.Nat.Prod.,69,(2006),1347	Gelsemium	Gelsemiaceae
Metabolite_6349	572.275	572.277	5.03267	C00029735	Artoindonesianin U	C35H40O7	Artocarpus champeden Spreng.	Hakim,J.Nat.Med.,60,(2006),161	Artocarpus	Moraceae
Metabolite_5640	505.265	505.268	5.82599	C00029016	Siwanine A;(+)-Siwanine A	C27H39NO8	Delphinium siwanense var. leptogen	Zhang,Phytochem.,48,(1998),191	Delphinium	Ranunculaceae
Metabolite_2721	276.055	276.055	0.718853	C00020350	3-Chloro-2-oxo-1(10),3,7(11),8-guiatetraen-12,6-olide	C15H13ClO3	Stevia sanguinea	Gil,Phytochem.,28,(1989),2841	Stevia	Asteraceae
Metabolite_1619	203.119	203.117	-8.01556	C00000094	N6-(delta2-Isopentenyl)adenine;2iP	C10H13N5	Saccharomyces cerevisiae	Jameson,J. Plant Physiol.,135,(1989),385	Saccharomyces	Saccharomycetaceae
Metabolite_5971	538.156	538.161	8.82891	C00045300	Erythrolide B	C26H31ClO10	Erythropodium caribaeorum	Banjoo,J.Nat.Prod.,65,(2002),314	0	0
Metabolite_6728	596.332	596.338	9.83639	C00015447	L 681512-2	C32H52O8S	Fusarium sp. FO-6651	Tabata,J.Antibiotics 52,(1999),1042	0	0
Metabolite_5643	506.203	506.205	4.49972	C00016942	Manumycin G	C28H30N2O7	Streptomyces sp. WB-8376	Shu,J.Antibiotics 47,(1994),324	Streptomyces	Streptomycetaceae
Metabolite_6350	572.481	572.48	-1.50751	C00044147	Dieporeticenin	C37H64O4	Annona reticulata	Zafra-Polo,Phytochem.,48,(1998),1087	Annona	Annonaceae
Metabolite_6723	596.323	596.32	-6.30731	C00022325	Baiyunoside	C31H48O11	Phlomis betonicoides	Nishizawa,J. Org. Chem.,52,(1987),4878	Phlomis	Labiatae
Metabolite_8666	787.624	787.617	-8.34873	C00032744	Astrocerebroside B	C44H85NO10	Luidia maculata	Kawatake,Chem.Pharm.Bull.,52,(2004),1092	Luidia	Luidiidae
Metabolite_6364	575.098	575.098	0.496387	C00017200	Dynemicin L	C30H22ClNO9	Micromonospora chersina M956-1 (ATCC 53710)	Konishi,J.Antibiotics 44,(1991),1300	Micromonospora	Micromonosporaceae
Metabolite_1223	181.014	181.014	-0.0811219	C00018264	Antibiotic FR 32863;Antibiotic FR 900136	C4H8NO5P	Streptomyces lavendulae	Okuhara,J. Antibiotics,33,(1980),24	Streptomyces	Streptomycetaceae
Metabolite_6366	575.256	575.255	-0.727453	C00017738	Foroxymithine	C22H37N7O11	Streptomyces nitrosporeus MG329-CF56	Umezawa,J.Antibiotics,38,(1985),1813	Streptomyces	Streptomycetaceae
Metabolite_2187	237.081	237.079	-7.78199	C00026496	Viridicatin	C15H11NO2	Penicillium vulpinum	Kozlovskii,Microbiology(Moscow),69,(2000),36	Penicillium	Trichocomaceae
Metabolite_5983	539.121	539.122	2.05469	C00018380	Fredericamycin A;NSC 305263	C30H21NO9	Streptomyces griseus FCRC-48	Pandey,J. Antibiotics,34,(1981),1389	Streptomyces	Streptomycetaceae
Metabolite_6352	572.516	572.517	1.78595	C00042454	Defuscin	C38H68O3	Baccharis gaudichaudiana	Hayashi,J.Nat.Prod.,68,(2005),1121	Baccharis	Asteraceae
Metabolite_8994	918.069	918.076	7.83468	C00041050	Mallotusinin	C41H26O25	Acalypha hispida	Amakura,Phytochem.,50,(1999),667	Acalypha	Euphorbiaceae
Metabolite_6353	573.256	573.257	2.22051	C00038785	Circinasine G	C30H39NO10	Aconitum hemsleyanum var.circinatum	Gao,J.Nat.Prod.,70,(2007),876	Aconitum	Ranunculaceae
Metabolite_8868	846.293	846.295	2.01569	C00040435	Tabularisin I	C41H50O19	Chukrasia tabularis var. velutina	Zhang,J.Nat.Prod.,70,(2007),1616	Chukrasia	Meliaceae
Metabolite_1130	176.051	176.051	-1.75273	C00007648	2-Oxo-6-methylthiohexanoic acid;6-Methylthio-2-oxohexanoic acid	C7H12O3S	Arabidopsis thaliana	Textor,Planta,218,(2004),1026	Arabidopsis	Cruciferae
Metabolite_1113	174.14	174.141	5.89767	C00021911	5,7a-Dihydro-1,4,4,7a-tetramethyl-4H-indene	C13H18	Cydonia oblonga	Ishihara,J. Org. Chem.,51,(1986),491	Cydonia	Rosaceae
Metabolite_5922	532.225	532.221	-8.40282	C00047853	Echitoserpidine	C30H32N2O7	Alstonia yunnanensis	Feng,J.Nat.Prod.,72,(2009),1836	Alstonia	Apocynaceae
Metabolite_5850	525.213	525.212	-0.51626	C00048892	Tubastrindole E;(+)-Tubastrindole E	C28H27N7O4	Tubastraea aurea	Blunt,Nat.Prod.Rep.,27,(2010),165	0	0
Metabolite_1833	214.131	214.132	3.82432	C00000757	Dethiobiotin	C10H18N2O3	Bacillus subtilis	Perkins,Bacillus subtilis and Other Gram-positive Bacteria.Biochenistry,Physiology,and Morecular Genetics,American Society for Microbiology,Washington DC,(1993),p319	Bacillus	Bacillaceae
Metabolite_6801	602.316	602.31	-9.44437	C00017061	RF 1023A;Trapoxin A	C34H42N4O6	Helicoma ambiens RF-1023	Itazaki,J.Antibiotics 43,(1990),1524	Helicoma	Tubeufiaceae
Metabolite_6189	560.406	560.402	-8.04292	C00022841	7,8-Didehydroaaptopurpurin;7,8-Didehydro-3-methoxy-beta,khi-carotene	C41H52O	Tedania digitata	Tanaka,Bull. Jap. Soc. Sci. Fish.,54,(1988),155	0	0
Metabolite_6187	560.318	560.314	-8.09263	C00031886	Inocalophyllin A;Calophynic acid	C35H44O6	Calophyllum inophyllum L.	Shen,Chem.Pharm.Bull.,52,(2003),802	Calophyllum	Calophyllaceae/Clusiaceae/Clusiaceae-Guttiferae
Metabolite_10247	1290.63	1290.62	-3.61143	C00039704	Maesasaponin IV3;(-)-Maesasaponin IV3	C62H98O28	Maesa lanceolata	Apers,Phytochem.,52,(1999),1121	Maesa	Maesaceae
Metabolite_2384	249.122	249.121	-2.35308	C00017096	(+)-Conagenin;Conagenin	C10H19NO6	Streptomyces filamentosus MI696-AF3	Yamashita,J.Antibiotics 44,(1991),557	Streptomyces	Streptomycetaceae
Metabolite_5858	525.92	525.918	-4.26246	C00004948	Kaempferol 3,7,4'-tri-O-sulfate	C15H10O15S3	Acrotrema uniflorum	Harborne, The Handbook of Natural Flavonoids, 1, (1999), 181.Flavonols;Gurni,Phytochem.,20,(1981),1057	Acrotrema	Dilleniaceae
Metabolite_5824	523.278	523.278	-0.557318	C00028680	Neoverataline B	C27H41NO9	Veratrum taliense	Zhou,Tetrahedron,59,(2003),5743	Veratrum	Melanthiaceae
Metabolite_5941	532.257	532.252	-9.48198	C00045143	Zizyvoside I	C25H40O12	Dioscorea spongiosa	Yin,J.Nat.Prod.,66,(2003),646	Dioscorea	Dioscoreaceae
Metabolite_6818	605.241	605.237	-5.77263	C00043863	Renieramycin R;(-)-Renieramycin R	C32H35N3O9	Xestospongia sp.	Amnuoypol,J.Nat.Prod.,67,(2004),1023	0	0
Metabolite_6208	562.418	562.417	-0.457318	C00022843	Aaptopurpurin;3-Methoxy-beta,khi-carotene	C41H54O	Aaptos aaptos	Tanaka,Bull. Jap. Soc. Sci. Fish.,51,(1985),1743	Aaptos	Suberitidae
Metabolite_6783	600.441	600.439	-3.88699	C00032387	Tricalysiolide I;(-)-Tricalysiolide I	C37H60O6	Tricalysia dubia	Tamaki,J.Nat.Med.,62,(2008),314	Tricalysia	Rubiaceae
Metabolite_2423	252.057	252.055	-7.14747	C00044488	8-Chlorogoniodiol	C13H13ClO3	Goniothalamus amuyon	Lan,J.Nat.Prod.,66,(2003),487	Goniothalamus	Annonaceae
Metabolite_6788	601.047	601.048	1.30165	C00007621	2-Phospho-4-(cytidine 5'-diphospho)-2-C-methyl-D-erythritol	C14H26N3O17P3	Arabidopsis thaliana	Okada,Planta,215,(2002),339;Lange,Plant Mol.Biol.,51,(2003),925	Arabidopsis	Cruciferae
Metabolite_5843	524.466	524.471	8.46759	C00026915	N-Pentacosanoyltryptamine	C35H60N2O	Rollinia mucosa	Chavez,J.Nat.Prod.,62,(1999),1119	Rollinia	Annonaceae
Metabolite_1918	220.193	220.194	2.83946	C00007732	Deoxoangustifoline	C14H24N2	Thermopsis mongolica	Ohmiya,The Alkaloids,47,(1995),1,Lupine alkaloids;Christov,J. Nat. Prod.,54,(1991),1413	Thermopsis	Fabaceae
Metabolite_8860	838.488	838.48	-8.94943	C00015159	Pipalamycin	C39H66N8O12	Streptomyces sp. ML297-90F8	Uchihata,J.Antibiotics 55,(2002),1	Streptomyces	Streptomycetaceae
Metabolite_2290	244.182	244.183	4.06187	C00001284	(-)-Falcarinol;Falcarinol;Panaxynol	C17H24O	Panax quinquefolium	Washida,Chem.Pharm.Bull.,51,(2003),1314	Panax	Araliaceae
Metabolite_5833	524.12	524.117	-6.71238	C00013991	5,7,2',3',4'-Pentahydroxy-3,6-dimethoxyflavone 7-glucoside;7-(beta-D-Glucopyranosyloxy)-5-hydroxy-3,6-dimethoxy-2-(2,3,4-trihydroxyphenyl)-4H-1-benzopyran-4-one	C23H24O14	Tridax procumbens	Ali,Fitoterapia,72,(2001),313	Tridax	Asteraceae
Metabolite_8933	882.432	882.434	2.91767	C00049646	Isopsychotridine B	C55H62O10	Psychotria oleoides	Jannic,J.Nat.Prod.,62,(1999),838	Psychotria	Rubiaceae
Metabolite_2287	244.088	244.088	2.21057	C00000756	Biotin	C10H16N2O3S	Arabidopsis thaliana	Tissort,Eur.J.Biochem.,258,(1998),586	Arabidopsis	Cruciferae
Metabolite_156	106.041	106.042	7.93333	C00034452	Benzaldehyde	C7H6O	Citrus aurantifolia	Jabalpurwala,Phytochem.,70,(2009),1428	Citrus	Rutaceae
Metabolite_1124	175.121	175.121	-0.457579	C00041987	(-)-Echinobetaine A	C8H17NO3	Echinodictyum sp.	Capon,J.Nat.Prod.,68,(2005),179	0	0
Metabolite_1887	219.077	219.075	-7.61344	C00000137	(R)-7-Methylsulfinyl heptyl isothiocyanate	C9H17NOS2	Rorippa indica (L.) Hiern.	Yamane,Kagaku to seibutu,29,(1991),92	Rorippa	Cruciferae
Metabolite_5898	530.259	530.263	7.15241	C00018302	Herbimycin B	C28H38N2O8	Streptomyces hygroscopicus AM-3672	Iwai,J. Antibiotics,33,(1980),1114	Streptomyces	Streptomycetaceae
Metabolite_9165	953.529	953.535	6.58241	C00033560	3-O-[alpha-L-arabinopyranosyl-(1->2)-beta-D-fucopyranosyl-(1->6)-2-acetamido-2-deoxy-beta-D-glucopyranosyl] echinocystic acid	C49H79NO17	Albizia procera	Melek,Phytochem.,68,(2007),1261	Albizia	Fabaceae
Metabolite_6177	556.306	556.304	-4.14372	C00003686	Cucurbitacin E	C32H44O8	Bryonia dioica	Hylands,Phytochem.,15,(1976),559;Ripperger,Tetrahedron,32,(1976),1567	Bryonia	Cucurbitaceae
Metabolite_2304	246.056	246.054	-7.85049	C00037046	Dibenzyl disulfide;Benzyl disulfide	C14H14S2	Petiveria alliacea	Kubec,Phytochem.,58,(2001),981	Petiveria	Phytolaccaceae
Metabolite_1123	175.1	175.1	-2.33869	C00023599	4-Methoxymethyl-2-methylindole	C11H13NO	Tricholoma sciodes	Garlaschelli,Tetrahedron,50,(1994),3571-3574	Tricholoma	Tricholomataceae
Metabolite_8908	870.574	870.566	-9.30664	C00030990	Pheophytin-a;Pheophytin a5	C55H74N4O5	Ajuga taiwanensis	Chan,Chem.Pharm.Bull.,53,(2005),836	Ajuga	Labiatae
Metabolite_10259	1298.38	1298.38	2.49195	C00014543	Ochnachalcone	C75H62O21	Ochna calodendron	Messanga,New.J.Chem.,25,(2001),1098	Ochna	Ochnaceae
Metabolite_5909	531.34	531.345	8.51822	C00049976	Ageline B	C31H43N6O2	Agelas sp.	Fu,J.Nat.Prod.,61,(1998),548	0	0
Metabolite_146	104.062	104.063	5.54192	C00037855	Styrene	C8H8	Rhodiola rosea L.	Rohloff,Phytochem.,59,(2002),655	Rhodiola	Crassulaceae
Metabolite_6173	556.258	556.259	1.37319	C00017960	6'-Deamino-6'-hydroxybutirosin A;Bu-1709E1;D-Streptamine	C21H40N4O13	Bacillus circulans strain No. YQW-B6	Tsukiura,J.Antibiotics,26,(1973),386	Bacillus	Bacillaceae
Metabolite_9162	953.277	953.27	-8.07473	C00016955	Promothiocin B;SF 2741B	C42H43N13O10S2	Streptomyces sp. SF2741	Yun,J.Antibiotics 47,(1994),510	Streptomyces	Streptomycetaceae
Metabolite_1873	218.127	218.127	-0.763181	C00001544	Lysopine	C9H18N2O4	0	Harborne,Phytochemical Dictionary Second Edition,Taylor and Francis,(1999),Chapter16	0	0
Metabolite_1000	166.028	166.027	-7.91962	C00031034	Piperonylic acid;3,4-Methylenedioxybenzoic acid	C8H6O4	Piper philippinum	Chen,Phytochem.,68,(2007),2101	Piper	Piperaceae
Metabolite_9170	954.58	954.579	-1.38088	C00047432	Desmethoxymajusculamide C	C49H78N8O11	Lyngbya majuscula	Simmons,J.Nat.Prod.,72,(2009),1011	0	0
Metabolite_5876	527.232	527.233	1.92466	C00018719	Destomycin A;Destonate 20;NSC 96877	C20H37N3O13	Streptomyces rimofaciens n. sp.	Kondo,J. Antibiotics Series A,18,(1965),38	Streptomyces	Streptomycetaceae
Metabolite_6181	558.275	558.28	9.98435	C00038455	Annomuricatin C	C27H38N6O7	Annona montana	Chuang,J.Nat.Prod.,71,(2008),1365	Annona	Annonaceae
Metabolite_153	105.043	105.043	-7.90585	C00001393	L-Serine	C3H7NO3	Arabidopsis thaliana	Rontein,J.Biol.Chem.,276,(2001),35523;Ho,J.Biol.Chem.,274,(1999),11007	Arabidopsis	Cruciferae
Metabolite_1862	218.09	218.09	3.42989	C00018021	Siastatin B	C8H14N2O5	Streptomyces verticillus var. quintum	Umezawa,J. Antibiotics,27,(1974),963	Streptomyces	Streptomycetaceae
Metabolite_1009	166.078	166.078	0.763319	C00001291	1-Phenyl-5-heptene-1,3-diyne	C13H10	Coreopsis spp.	Harborne,Phytochemical Dictionary Second Edition,Taylor and Francis,(1999),Chapter8	Coreopsis	Asteraceae
Metabolite_1147	176.057	176.059	8.25842	C00026244	Glycosmicine;1,2,3,4-Tetrahydro-1-methyl-2,4-dioxoquinazoline; 1-Methyl-2,4(1H,3H)-quinazolinedione; 1-Methyl-2,4-quinazolinedione	C9H8N2O2	Glycosmis arborea (Roxb.) DC.	Pakrashi,Ann.Biochem.Exp.Med.,23,(1963),123	Glycosmis	Rutaceae
Metabolite_175	108.094	108.094	2.56106	C00000241	Fucoserratene;(3E,5Z)-1,3,5-Octatriene	C8H12	Fucus serratus	Mueller,FEBS Lett.,30,(1973),137;Jaenicke,Chem. Ber.,108,(1975),225	Fucus	Fucaceae
Metabolite_2250	241.14	241.143	9.19766	C00017097	Leuhistin;Leuhistine	C11H19N3O3	Bacillus laterosporus BMI156-14F1	Aoyagi,J. Antibiotics,44,(1991),573	Bacillus	Bacillaceae
Metabolite_6152	554.314	554.31	-6.83452	C00028821	PF1070B	C30H42N4O6	Humicola PF1070	Yoshida,Meiji Seika Kenkyu Nenpo,32,(1993),58	0	0
Metabolite_6266	566.307	566.31	6.90709	C00034673	Sanjoinine A dialdehyde	C31H42N4O6	Zizyphus jujube var. inermis	Martinez-Luis,Phytochem.,68,(2007),1882	0	0
Metabolite_1110	174.104	174.104	3.11032	C00021948	Dihydropalutropone	C12H14O	Grindelia paludosa	Bohlmann,Phytochem.,21,(1982),167	Grindelia	Asteraceae
Metabolite_1111	174.113	174.112	-9.4642	C00001340	L-Arginine	C6H14N4O2	Arabidopsis thaliana	Nikiforova,Plant Physiol.,138,(2005),304	Arabidopsis	Cruciferae
Metabolite_8801	814.501	814.508	8.75808	C00018200	Lonomycin C	C43H74O14	Streptomyces ribosidificus TM-481	Seto,J. Antibiotics,31,(1978),929	Streptomyces	Streptomycetaceae
Metabolite_2503	260.036	260.035	-1.03175	C00028834	Phorbazole D	C13H9ClN2O2	Phorbas aff. clathrata	Rudi,Tetrahedron Lett.,35,(1994),2589	0	0
Metabolite_7018	612.205	612.205	0.648368	C00010594	Durantoside III	C28H36O15	Duranta repens	Rimpler,Z.Naturforsch.,29C,(1974),11	Duranta	Verbenaceae
Metabolite_1747	209.086	209.084	-7.93732	C00024670	1-Acetylcarbazole	C14H11NO	Tedania ignis	Dillman,J.Nat.Prod.,51,(1991),1056	0	0
Metabolite_2505	260.065	260.064	-1.43347	C00000143	3-Hydroxyuridine	C9H12N2O7	Baillonella toxisperma	Ohigashi,Phytochem.,28,(1989),1365;Koshimizu,kagaku to kougyou,43,(1990),1682	Baillonella	Sapotaceae
Metabolite_8802	814.537	814.538	2.14329	C00047900	Ganosinensin C;(+)-Ganosinensin C	C51H74O8	Ganoderma sinense	Sato,J.Nat.Prod.,72,(2009),958	Ganoderma	Ganodermataceae
Metabolite_2533	261.208	261.209	5.51643	C00002032	Cryptophorine	C17H27NO	Bathiorhamnus cryptophorous	Harborne,Phytochemical Dictionary Second Edition,Taylor and Francis,(1999),Chapter25	Bathiorhamnus	Rhamnaceae
Metabolite_1724	208.086	208.085	-4.95607	C00007604	L-Kynurenine	C10H12N2O3	Arabidopsis thaliana	Katoh,Frontiers.Biosci.,9,(2004),1577	Arabidopsis	Cruciferae
Metabolite_7030	612.325	612.327	2.81591	C00017204	BE 18257B;WS 7338B	C31H44N6O7	Streptomyces misakiensis	Kojiri,J.Antibiotics 44,(1991),1342	Streptomyces	Streptomycetaceae
Metabolite_5954	534.239	534.237	-4.34656	C00016940	Asukamycin E;Manumycin E	C30H34N2O7	Streptomyces sp. WB-8376	Shu,J.Antibiotics 47,(1994),324	Streptomyces	Streptomycetaceae
Metabolite_2553	262.232	262.23	-8.992	C00022163	Farnesyl acetone;Farnesylacetone	C18H30O	Centaurea sessilis	Yayli,Phytochem.,66,(2005),1741	Centaurea	Asteraceae
Metabolite_2535	262.013	262.015	7.25095	C00043982	Tichocarpol A	C9H10O7S	Tichocarpus crinitus	Ishii,J.Nat.Prod.,67,(2004),1764	0	0
Metabolite_2241	240.15	240.151	5.37874	C00001279	Dehydrofalcarinone	C17H20O	Artemisia campestris	Harborne,Phytochemical Dictionary Second Edition,Taylor and Francis,(1999),Chapter8	Artemisia	Asteraceae
Metabolite_6275	567.218	567.222	6.79827	C00018159	Saframycin C	C29H33N3O9	Streptomyces lavendulae No. 314	Arai,J. Antibiotics,30,(1977),1015	Streptomyces	Streptomycetaceae
Metabolite_187	109.065	109.064	-4.82563	C00002024	Brunfelsamidine	C5H7N3	Brunfelsia grandiflora	Harborne,Phytochemical Dictionary Second Edition,Taylor and Francis,(1999),Chapter25	Brunfelsia	Solanaceae
Metabolite_1749	209.141	209.142	0.742606	C00025559	3-Tigloyloxynortropane	C12H19NO2	Hyoscyamus pusillus L.	Parr,Phytochem.,29,(1990),2545	Hyoscyamus	Solanaceae
Metabolite_1763	210.08	210.079	-3.85851	C00029415	1-Acetyl beta-Carboline	C13H10N2O	Sedum sarmentosum	Morikawa,Chem.Pharm.Bull.,55,(2007),435	Sedum	Crassulaceae
Metabolite_1925	221.09	221.09	0.0618364	C00019583	N-Acetyl-D-mannosamine;2-Acetamido-2-deoxy-D-mannose	C8H15NO6	Escherichia coli K1	Ringenberg,Mol. Microbiol.,50,(2003),961	Escherichia	Enterobacteriaceae
Metabolite_5801	520.332	520.33	-3.10503	C00028828	Phlegmariurine C	C32H44N2O4	Phlegmariurus fordii	Chu,Yaoxue Xuebao,23,(1988),115	Phlegmariurus	Lycopodiaceae
Metabolite_6999	611.351	611.353	3.44261	C00037044	Destruxin E diol	C29H49N5O9	Metarrhizium anisopliae (Metchnikoff)	Pedras,Phytochem.,59,(2002),579	0	0
Metabolite_2467	256.135	256.132	-8.24724	C00042029	1',8-Dihydroaplysinopsin	C14H16N4O	Thorectandra sp. NCI coll.no.0CDN5714	Segraves,J.Nat.Prod.,68,(2005),1484	0	0
Metabolite_2455	255.098	255.097	-4.19295	C00007312	Dihydroneopterin	C9H13N5O4	Arabidopsis thaliana	Andrew,Cur.Po.Plant Biol.,5,(2002),244	Arabidopsis	Cruciferae
Metabolite_2445	254.043	254.043	-0.672616	C00031458	(+)-Taraxafolin B	C11H10O7	Taraxacum formosanum	Leu,Chem.Pharm.Bull.,53,(2005),853	Taraxacum	Asteraceae
Metabolite_6156	554.329	554.324	-7.88297	C00048547	Stypotriol triacetate	C33H46O7	Stypopodium flabelliforme	Areche,Phytochem.,70,(2009),1315	0	0
Metabolite_9708	1120.1	1120.09	-8.53024	C00002931	Mallotusinic acid	C48H32O32	Alchornea trewioides	Harborne,Phytochemical Dictionary Second Edition,Taylor and Francis,(1999),Chapter45	Alchornea	Euphorbiaceae
Metabolite_6219	564.076	564.076	0.234424	C00007456	dTDP-D-glucose;TDP-D-glucose;TDPG	C16H26N2O16P2	Arabidopsis thaliana	Watt,Plant Physiol.,134,(2004),1337	Arabidopsis	Cruciferae
Metabolite_5809	521.278	521.281	6.30235	C00045901	Epothilone B10;(-)-Epothilone B10	C28H43NO6S	Sorangium cellulosum	Hardt,J.Nat.Prod.,64,(2001),847	0	0
Metabolite_1796	210.174	210.173	-2.42757	C00025368	Dihydrolusitanine	C12H22N2O	Poecilanthe amazonica	Greinwald,Biochem.Syst.Ecol.,23,(1995),547	Poecilanthe	Fabaceae
Metabolite_9606	1082.11	1082.12	9.12476	C00048203	Thiazomycin E2	C41H38N12O14S5	Amycolatopsis fastidiosa	Zhang,J.Nat.Prod.,72,(2009),841	Amycolatopsis	Pseudonocardiaceae
Metabolite_1160	177.083	177.082	-1.5478	C00007594	Dihomomethionine	C7H15NO2S	Arabidopsis thaliana	Hansen,J.Biol.Chem.,276,(2001),11078	Arabidopsis	Cruciferae
Metabolite_5782	519.189	519.189	0.757648	C00041328	Aglaroxin A;(-)-Aglaroxin A	C29H29NO8	Aglaia edulis	Kim,J.Nat.Prod.,69,(2006),1769	Aglaia	Meliaceae
Metabolite_6249	565.299	565.297	-2.96991	C00017878	Sch 36605	C24H39N9O7	Streptomyces sp. SCC 1785	Gullo,J.Antibiotics,41,(1988),20	Streptomyces	Streptomycetaceae
Metabolite_5779	518.298	518.299	2.65901	C00015612	19-Demethoxylebstatin;Autolytimycin	C28H42N2O7	Streptomyces sp. S6699	Ivanova,J.Antibiotics 53,(2000),657	Streptomyces	Streptomycetaceae
Metabolite_6765	599.291	599.286	-8.82777	C00017682	Phoslactomycin A	C29H46NO10P	Streptomyces nigrescens SC-273	Fushimi,J.Antibiotics,42,(1989),1019	Streptomyces	Streptomycetaceae
Metabolite_5784	519.222	519.218	-8.79518	C00018463	FK 156;FR 900156	C20H33N5O11	Streptomyces olivaceogriseus sp. nov. No. C-353	Gotoh,J. Antibiotics,35,(1982),1280	Streptomyces	Streptomycetaceae
Metabolite_2483	258.074	258.074	-0.661615	C00010660	Posoquenin	C11H14O7	Posoqueria latifolia	Chao,J.Nat.Prod.,43,(1980),571	Posoqueria	Rubiaceae
Metabolite_6238	564.3	564.295	-9.63771	C00028127	Daechuine S10	C31H40N4O6	Zizyphus jujuba var.inermis	Han,Pure Appl.Chem.,61,(1989),443	0	0
Metabolite_5944	533.23	533.226	-6.42729	C00025583	3'S-Hydroxy-5'-des-O-methylharringtonine	C27H35NO10	Cephalotaxus harringtonia var.drupacea	Takano,Phytochem.,43,(1996),299	Cephalotaxus	Cephalotaxaceae
Metabolite_1153	176.157	176.157	-1.83309	C00044038	(3E,5Z,7Z,9E)-Trideca-3,5,7,9-tetraene	C13H20	Wahlenbergia marginata	Tan,Phytochem.,48,(1998),1245	Wahlenbergia	Campanulaceae/Lobeliaceae
Metabolite_1926	221.094	221.095	5.76143	C00041637	Lophocladine B	C14H11N3	Lophocladia sp.	Gross,J.Nat.Prod.,69,(2006),640	0	0
Metabolite_5577	502.212	502.214	4.75076	C00049810	Maculalactone E;(+)-Maculalactone E	C34H30O4	Kyrtuthrix maculans	Lee,J.Nat.Prod.,61,(1998),29	0	0
Metabolite_6860	607.311	607.316	8.1198	C00034464	Chamaedrine	C36H41N5O4	Melochia chamaedrys	Dias,Phytochem.,68,(2007),668	Melochia	Malvaceae
Metabolite_3055	294.065	294.066	2.5951	C00019812	Chloculol	C15H15ClO4	Murraya paniculata	Ito,J. Chem. Soc. Perkin Trans. I,7,(1990),2047	Murraya	Rutaceae
Metabolite_3056	294.084	294.085	4.29347	C00000744	Sarubicin A	C13H14N2O6	Streptomyces helicus sp. n. (UC-5837)	Slechta,J. Antibiotics,33,(1980),919	Streptomyces	Streptomycetaceae
Metabolite_3061	294.122	294.122	-0.856271	C00018571	BBM 2040A;Chicamycin A	C14H18N2O5	Streptomyces albus No. J576-99	Konishi,J. Antibiotics,37,(1984),191	Streptomyces	Streptomycetaceae
Metabolite_9077	944.232	944.233	2.07807	C00034376	2'-(5''-O-E-Feruloylapiosyl)phyllocactin	C42H44N2O23	Hylocereus ocamponis	Wybraniec,Phytochem.,68,(2007),251	Hylocereus	Cactaceae
Metabolite_8486	752.359	752.362	3.45256	C00038617	Boivinide F	C38H56O15	Roupellina boivinii	Karkare,J.Nat.Prod.,70,(2007),1766	Roupellina	Apocynaceae
Metabolite_9070	942.33	942.327	-3.42913	C00026768	Neonaucleoside B;(-)-Neonaucleoside B	C45H54N2O20	Neonauclea sessilifolia	Ito,Phytochem.,62,(2003),359	Neonauclea	Rubiaceae
Metabolite_3040	293.064	293.065	3.28104	C00048829	Proximicin A	C12H11N3O6	Verrucosispora maris	Blunt,Nat.Prod.Rep.,27,(2010),165	0	0
Metabolite_3041	293.126	293.126	-0.00280869	C00038746	Chlorantene B;(-)-Chlorantene B	C15H19NO5	Chloranthus serratus	Yuan,J.Nat.Prod.,71,(2008),2021	Chloranthus	Chloranthaceae
Metabolite_3046	293.201	293.199	-5.21766	C00021373	Nobilonine	C17H27NO3	Dendrobium nobile	Onaka,Chem. Pharm. Bull.,13,(1965),745	Dendrobium	Orchidaceae
Metabolite_6112	550.122	550.126	7.55963	C00044205	Isosengulone	C32H22O9	Senna sophera	Alemayehu,Phytochem.,48,(1998),699	Senna	Fabaceae
Metabolite_2054	228.038	228.04	9.9356	C00007304	Mevalonate 5-phosphate	C6H13O7P	Arabidopsis thaliana	Lange,Plant Mol.Biol.,51,(2003),925	Arabidopsis	Cruciferae
Metabolite_3069	295.059	295.057	-6.73508	C00019655	Aminoimidazole ribonucleotide;AIR (nucleotide);5-Amino-1-beta-D-ribofuranosyl-5'-(dihydrogen phosphate)-imidazole	C8H14N3O7P	Escherichia coli K12	Smith,J. Biol. Chem.,262,(1987),10565	Escherichia	Enterobacteriaceae
Metabolite_6512	588.486	588.491	7.65983	C00022903	1'-Hydroxy-3,4,1',2'-tetrahydrospheroidene;1,1',2,2',7,8-Hexahydro-1-hydroxy-1'-methoxy-psi,psi-carotene	C41H64O2	Rhodospirillum rubrum	Davies,Phytochem.,13,(1974),209	Rhodospirillum	Rhodospirillaceae
Metabolite_8474	752.12	752.122	3.39728	C00013768	Loropetalin D;Kaempferol 3-(2'',6''-digalloylglucoside);3-[[2,6-bis-O-(3,4,5-Trihydroxybenzoyl)-beta-D-glucopyranosyl]oxy]-5,7-dihydroxy-2-(4-hydroxyphenyl)-4H-1-benzopyran-4-one	C35H28O19	Loropetalum chinense	Liu,Tianran Chanwu Yanjiu Yu Kaifa,9,(1997),12	Loropetalum	Hamamelidaceae
Metabolite_6515	589.383	589.384	1.71509	C00016115	Peptaibolin	C31H51N5O6	Sepedonium sp. HKI-0117	Hulsmann,J.Antibiotics 51,(1998),1055	0	0
Metabolite_8473	752.087	752.085	-1.83319	C00029214	Verticillin E	C32H28N6O8S4	Gliocladium catenulatum	Joshi,J.Nat.Prod.,62,(1999),730	Gliocladium	Hypocreaceae
Metabolite_1370	188.156	188.157	5.19296	C00011894	(R)-1-Methyl-4-(1-methyl-5-hexenyl)-benzene	C14H20	Senecio digitalifolius	Bohlmann,Phytochem.,17,(1978),759	Senecio	Asteraceae
Metabolite_2044	227.189	227.189	-1.73644	C00047003	Andrachcinidine;(-)-Andrachcinidine	C13H25NO2	Andrachne aspera	Mill,J.Nat.Prod.,63,(2000),762	Andrachne	Phyllanthaceae
Metabolite_1368	188.152	188.152	0.288857	C00000759	7,8-Diaminopelargonic acid	C9H20N2O2	Bacillus subtilis	Perkins,Bacillus subtilis and Other Gram-positive Bacteria.Biochenistry,Physiology,and Morecular Genetics,American Society for Microbiology,Washington DC,(1993),p319	Bacillus	Bacillaceae
Metabolite_6511	588.403	588.403	-0.542835	C00049612	Argentinic acid B	C35H56O7	Aglaia argentea	Mohamad,J.Nat.Prod.,62,(1999),868	Aglaia	Meliaceae
Metabolite_3079	296.053	296.053	0.992433	C00002765	Phaseolic acid	C13H12O8	Phaseolus vulgaris	Harborne,Phytochemical Dictionary Second Edition,Taylor and Francis,(1999),Chapter42	Phaseolus	Fabaceae
Metabolite_2051	227.261	227.261	-0.543375	C00016569	(S)-12-Methyl-1-tetradecanamine;Medelamine B;NK 148198B	C15H33N	Streptomyces sp. NK14819	Morino,J.Antibiotics 48,(1995),904	Streptomyces	Streptomycetaceae
Metabolite_6505	587.277	587.273	-6.09088	C00045151	11,13-O-Diacetylglanduline;(+)-11,13-O-Diacetylglanduline	C31H41NO10	Consolida glandulosa	Ruiz-Mesia,J.Nat.Prod.,65,(2002),496	Consolida	Ranunculaceae
Metabolite_3073	296.035	296.032	-9.57855	C00009760	Medicagol;3-Hydroxy-8,9-methylenedioxycoumestan;7-Hydroxy-11,12-methylenedioxycoumestan	C16H8O6	Trifolium pratense	Harborne, The Handbook of Natural Flavonoids, 2, (1999), 517,Isoflavonoids and neoflavonoids;Livingston,J.Org.Chem.,30,(1965),2353;Zilg,Phytochem.,8,(1969),2261	Trifolium	Fabaceae
Metabolite_2047	227.209	227.21	1.47385	C00038765	Cinnabaramide A;(-)-Cinnabaramide A	C10H29NO4	Streptomyces sp.	Stadler,J.Nat.Prod.,70,(2007),246	Streptomyces	Streptomycetaceae
Metabolite_7172	622.206	622.211	7.99768	C00033400	Suffruticoside E	C26H38O17	Paeonia suffruticosa ANDREWS	Matsuda,Chem.Pharm.Bull.,49,(2001),69	Paeonia	Paeoniaceae
Metabolite_3005	291.161	291.158	-9.72663	C00001726	Eseridine	C15H21N3O3	Physostigma venenosum	Harborne,Phytochemical Dictionary Second Edition,Taylor and Francis,(1999),Chapter20	Physostigma	Fabaceae
Metabolite_8512	762.164	762.164	0.944655	C00013871	Quercetin 3-(2''-galoylrutinoside);3-[[6-O-(6-Deoxy-alpha-L-mannopyranosyl)-2-O-(3,4,5-trihydroxybenzoyl)-beta-D-glucopyranosyl]oxy]-2-(3,4-dihydroxyphenyl)-5,7-dihydroxy-4H-1-benzopyran-4-one	C34H34O20	Euphorbia ebractedata	Ahn,Planta Med.,62,(1996),383	Euphorbia	Euphorbiaceae
Metabolite_107	100.064	100.064	-4.60363	C00001412	Gyromitrin	C4H8N2O	Gyromitra esculenta	Harborne,Phytochemical Dictionary Second Edition,Taylor and Francis,(1999),Chapter11	Gyromitra	Discinaceae
Metabolite_9546	1049.51	1049.51	0.513687	C00031593	Anabaenopeptilide 202-A	C51H71N9O15	Anabaena sp. 202A2/41	Harada,Chem.Pharm.Bull.,52,(2004),889	Anabaena	Euphorbiaceae
Metabolite_6480	584.307	584.31	4.52303	C00001650	Lappaconitine	C32H44N2O8	Aconitum excelsum	Harborne,Phytochemical Dictionary Second Edition,Taylor and Francis,(1999),Chapter19	Aconitum	Ranunculaceae
Metabolite_5451	491.13	491.132	3.29912	C00007845	9-Methylthiononyl glucosinolate	C17H33NO9S3	Arabis alpina	Cole,Phytochem.,15,(1976),759	Arabis	Cruciferae
Metabolite_5461	492.116	492.119	5.05276	C00020528	9beta-Acetoxy-3-chloro-8beta-(5-acetoxy-tiglinoyloxy)-dehydroleucodin	C24H25ClO9	Lasiolaena santosii	Bohlmann,Phytochem.,20,(1981),1613	Lasiolaena	Asteraceae
Metabolite_94	99.1051	99.1048	-3.27054	C00044142	Cyclohexylamine	C6H13N	Toddalia asiatica	Tsai,Phytochem.,48,(1998),1377	Toddalia	Rutaceae
Metabolite_10174	1257.79	1257.78	-3.67309	C00016111	Aflastatin A	C62H115NO24	Streptomyces sp. MRI 142	Ono,J.Antibiotics 51,(1998),1019	Streptomyces	Streptomycetaceae
Metabolite_9547	1049.56	1049.56	-3.61493	C00040732	Zooxanthellamide D	C54H83NO19	Symbiodinium sp ZAD-D	Fukatsu,J.Nat.Prod.,70,(2007),497	Symbiodinium	Blastodiniaceae
Metabolite_7156	621.296	621.295	-1.29432	C00028950	Rugosanine B	C36H39N5O5	Zizyphus rugosa	Pandey,Planta Med.,56,(1990),649	0	0
Metabolite_6868	607.373	607.372	-1.79667	C00044904	Malyngamide J;(+)-Malyngamide J	C33H53NO9	Lyngbya majuscula	Nogle,J.Nat.Prod.,66,(2003),217	0	0
Metabolite_8510	759.579	759.578	-1.34082	C00032109	Palmitoyloleoylphosphatidylcholine	C42H82NO8P	Dioscorea opposita	Sautour,Chem.Pharm.Bull.,52,(2004),1235	Dioscorea	Dioscoreaceae
[truncated: 131 more rows]

## Sheet: TableS2_KEGG_Mapping
Table S2 KNApSAcK and KEGG pathway mapping of the acquired mass features
Metabolite_ID	Metabolite feature mass	Molecular mass in the KEGG database	Delta Mass (ppm)	KEGG_ID	Assigned Metabolite Name	Assigned Chemical Formula	Reaction	Pathway	Enzyme	DBLINKS
Metabolite_2499	260.03	260.03	-2.39799	C00085	D-Fructose 6-phosphate	C6H13O9P	R00756 R00758 R00760 R00761 R00762 R00763 R00764 R00765 R00766 R00767 R00768 R00769 R00770 R00771 R00772 R00876 R01067 R01140 R05339 R05805 R06073 R07133 R08406 R08575 R08947 R09031	ko00040 Pentose and glucuronate interconversions ko00680 Methane metabolism ko00710 Carbon fixation in photosynthetic organisms ko01100 Metabolic pathways	1.1.1.17 1.1.1.140 2.2.1.1 2.2.1.2 2.4.1.14 2.4.1.246 2.6.1.16 2.7.1.1 2.7.1.4 2.7.1.11 2.7.1.61 2.7.1.90 2.7.1.146 3.1.3.11 3.1.3.46 3.5.99.6 4.1.2.22 5.1.3.- 5.3.1.8 5.3.1.9 5.3.1.27	CAS: 643-13-0 PubChem: 3385 ChEBI: 15946 KNApSAcK: C00007305 3DMET: B04628 NIKKAJI: J92.807K
Metabolite_817	152.12	152.12	1.15995	C00964	(-)-trans-Carveol	C10H16O	R02468 R03114	ko00902 Monoterpenoid biosynthesis ko00903 Limonene and pinene degradation	1.1.1.243 1.14.13.48	PubChem: 4215 ChEBI: 15389 LIPIDMAPS: LMPR0102090005 KNApSAcK: C00000814 3DMET: B01361 NIKKAJI: J9.137E
Metabolite_1203	180.064	180.063	-3.46294	C00031	D-Glucose	C6H12O6	R00010 R00015 R00016 R00049 R00063 R00299 R00300 R00301 R00302 R00303 R00304 R00305 R00306 R00307 R00308 R00327 R00337 R00503 R00534 R00550 R00725 R00801 R00837 R00838 R00839 R00850 R00874 R00952 R00953 R01006 R01100 R01101 R01139 R01444 R01460 R01498 R01555 R01718 R02185 R02558 R02595 R02727 R02738 R02985 R03075 R03323 R03604 R03703 R03801 R03802 R03820 R04006 R04094 R04194 R04333 R04409 R04410 …	ko00010 Glycolysis / Gluconeogenesis ko00030 Pentose phosphate pathway ko00052 Galactose metabolism ko00500 Starch and sucrose metabolism ko00520 Amino sugar and nucleotide sugar metabolism ko00521 Streptomycin biosynthesis ko00524 Butirosin and neomycin biosynthesis ko00901 Indole alkaloid biosynthesis ko01100 Metabolic pathways ko01110 Biosynthesis of secondary metabolites ko02010 ABC transport…	1.1.1.118 1.1.1.119 1.1.1.121 1.1.3.10 1.1.5.2 1.1.99.10 1.1.99.28 2.3.1.72 2.3.1.90 2.3.1.91 2.3.1.92 2.3.1.103 2.3.1.143 2.3.1.152 2.3.1.- 2.4.1.8 2.4.1.9 2.4.1.10 2.4.1.20 2.4.1.22 2.4.1.25 2.4.1.31 2.4.1.64 2.4.1.99 2.4.1.230 2.4.1.245 2.7.1.1 2.7.1.2 2.7.1.41 2.7.1.42 2.7.1.61 2.7.1.62 2.7.1.63 2.7.1.69 2.7.1.142 2.7.1.147 3.1.1.33 3.1.3.9 3.1.3.10 3.1.3.58 3.1.4.48 3.1.6.3 3.2.1.10 3.2.1.20…	CAS: 50-99-7 PubChem: 3333 ChEBI: 4167 KNApSAcK: C00001122 3DMET: B04623 NIKKAJI: J4.109B
Metabolite_1647	204.187	204.188	3.31289	C16141	(+)-Germacrene A	C15H24	R07649	ko00909 Sesquiterpenoid biosynthesis map01062 Biosynthesis of terpenoids and steroids ko01110 Biosynthesis of secondary metabolites	4.2.3.23	CAS: 28028-64-0 PubChem: 47205451 NIKKAJI: J1.049.582B
Metabolite_810	152.047	152.047	0.502815	C00642	4-Hydroxyphenylacetate	C8H8O3	R00042 R02514 R02516 R02695 R02697 R02698 R02699 R06790 R07312 R08971	ko00350 Tyrosine metabolism ko00360 Phenylalanine metabolism	1.2.1.5 1.2.1.29 1.2.1.53 1.2.3.13 1.14.13.3 1.14.13.18 4.1.1.83 6.2.1.-	CAS: 156-38-7 PubChem: 3915 ChEBI: 18101 PDB-CCD: 4HP 3DMET: B00153 NIKKAJI: J5.873D
Metabolite_1022	168.042	168.042	1.64513	C00544	Homogentisate	C8H8O4	R02514 R02515 R02516 R02517 R02518 R02519 R02520 R02521 R05450 R07500 R08782	ko00130 Ubiquinone and other terpenoid-quinone biosynthesis ko00350 Tyrosine metabolism ko00643 Styrene degradation ko01100 Metabolic pathways	1.13.11.5 1.13.11.27 1.13.12.- 1.14.13.18 1.14.13.63 1.14.13.- 2.5.1.- 4.1.1.-	CAS: 451-13-8 PubChem: 3825 ChEBI: 44747 KNApSAcK: C00007309 PDB-CCD: OMD 3DMET: B00126 NIKKAJI: J5.750I
Metabolite_2679	272.069	272.068	-2.29188	C00509	Naringenin	C15H12O5	R02442 R02443 R02444 R02445 R02446 R02897 R06553 R06610 R07778 R08026 R08129 R08951	ko00941 Flavonoid biosynthesis ko00943 Isoflavonoid biosynthesis map01061 Biosynthesis of phenylpropanoids ko01100 Metabolic pathways ko01110 Biosynthesis of secondary metabolites	1.1.1.219 1.1.1.234 1.14.11.9 1.14.11.22 1.14.13.21 1.14.13.86 1.14.13.88 2.4.1.185 2.5.1.70 5.5.1.6	CAS: 480-41-1 PubChem: 3792 ChEBI: 17846 LIPIDMAPS: LMPK12140001 KNApSAcK: C00000982 PDB-CCD: NAR 3DMET: B01275 NIKKAJI: J325.849A
Metabolite_533	136.054	136.052	-8.99321	C01454	Toluate	C8H8O2	R05289 R05290 R05291	ko00622 Xylene degradation ko01100 Metabolic pathways	1.2.1.7 1.2.1.28 1.14.12.-	CAS: 99-94-5 PubChem: 4631 ChEBI: 36635 PDB-CCD: 4MA 3DMET: B00292 NIKKAJI: J5.162D
Metabolite_2083	230.019	230.019	2.07136	C00117	D-Ribose 5-phosphate	C5H11O8P	R00182 R00510 R01049 R01050 R01051 R01052 R01053 R01054 R01055 R01056 R01057 R01128 R01270 R01641 R02171 R02345 R06590 R06863	ko00030 Pentose phosphate pathway ko00230 Purine metabolism ko00710 Carbon fixation in photosynthetic organisms ko01100 Metabolic pathways ko01110 Biosynthesis of secondary metabolites	2.2.1.1 2.2.1.4 2.7.1.15 2.7.1.18 2.7.6.1 2.7.7.35 3.2.2.4 3.2.2.10 3.2.2.12 3.2.2.14 3.6.1.13 3.6.1.21 3.6.1.- 4.2.1.70 5.3.1.6 5.4.2.2 5.4.2.7 6.3.4.7	CAS: 4300-28-1 PubChem: 3417 ChEBI: 17797 KNApSAcK: C00007473 3DMET: B04635 NIKKAJI: J205.693C
Metabolite_940	162.053	162.053	-0.762395	C01088	(R)-3,3-Dimethylmalate	C6H10O5	R01211 R03198	ko00770 Pantothenate and CoA biosynthesis	1.1.1.84 1.2.1.33	PubChem: 4323 ChEBI: 15587 3DMET: B00238 NIKKAJI: J2.366.630H
Metabolite_536	136.125	136.125	2.76548	C00521	(-)-Limonene	C10H16	R02013 R02468 R02469 R02470	ko00902 Monoterpenoid biosynthesis ko00903 Limonene and pinene degradation map01062 Biosynthesis of terpenoids and steroids ko01100 Metabolic pathways ko01110 Biosynthesis of secondary metabolites	1.14.13.47 1.14.13.48 1.14.13.49 4.2.3.16	CAS: 5989-54-8 PubChem: 3804 ChEBI: 15383 LIPIDMAPS: LMPR0102090002 KNApSAcK: C00000803 3DMET: B01278 NIKKAJI: J85.992C
Metabolite_1167	178.048	178.048	-2.94049	C00198	D-Glucono-1,5-lactone	C6H10O6	R00300 R00305 R00874 R01519 R01520 R01521 R01522 R03861 R06620 R07147	ko00030 Pentose phosphate pathway ko01100 Metabolic pathways ko01110 Biosynthesis of secondary metabolites	1.1.1.47 1.1.1.118 1.1.1.119 1.1.1.121 1.1.3.4 1.1.3.5 1.1.5.2 1.1.99.10 1.1.99.28 2.3.1.132 2.4.1.1 (I) 3.1.1.17	CAS: 90-80-2 PubChem: 3498 ChEBI: 16217 PDB-CCD: LGC 3DMET: B01186 NIKKAJI: J1.174F
Metabolite_4554	426.39	426.386	-8.96734	C01054	(S)-2,3-Epoxysqualene	C30H50O	R02116 R02873 R02874 R03199 R03200 R03201 R06466 R06469 R06471 R08376 R08378	ko00100 Steroid biosynthesis map01060 Biosynthesis of plant secondary metabolites map01062 Biosynthesis of terpenoids and steroids map01070 Biosynthesis of plant hormones ko01100 Metabolic pathways ko01110 Biosynthesis of secondary metabolites	1.14.99.7 5.4.99.7 5.4.99.8	CAS: 7200-26-2 PubChem: 4295 ChEBI: 15441 LIPIDMAPS: LMPR0106010010 KNApSAcK: C00007282 3DMET: B01371 NIKKAJI: J39.259F
Metabolite_972	164.048	164.047	-3.19145	C00166	Phenylpyruvate	C9H8O3	R00688 R00689 R00692 R00694 R00695 R01370 R01371 R01372 R01373 R01374 R01375 R01376 R01377 R01378 R01582	ko00360 Phenylalanine metabolism ko00400 Phenylalanine, tyrosine and tryptophan biosynthesis ko00960 Tropane, piperidine and pyridine alkaloid biosynthesis map01060 Biosynthesis of plant secondary metabolites ko01100 Metabolic pathways ko01110 Biosynthesis of secondary metabolites	1.1.1.222 1.1.1.237 1.4.1.20 1.4.3.2 1.4.99.1 1.13.11.27 2.6.1.1 2.6.1.5 2.6.1.9 2.6.1.21 2.6.1.28 2.6.1.57 2.6.1.58 2.6.1.64 2.6.1.70 4.1.1.43 4.1.1.- 4.2.1.51 4.2.1.91 5.3.2.1	CAS: 156-06-9 PubChem: 3466 ChEBI: 30851 KNApSAcK: C00000751 PDB-CCD: PPY 3DMET: B00048 NIKKAJI: J11.025F
Metabolite_3589	334.216	334.214	-3.66097	C05949	12-Keto-leukotriene B4	C20H30O4	R03863 R03864	ko00590 Arachidonic acid metabolism	0	PubChem: 8233 ChEBI: 27814 LIPIDMAPS: LMFA03020024 LipidBank: XPR3111 3DMET: B01923 NIKKAJI: J662.082E
Metabolite_735	147.054	147.053	-6.96039	C00025	L-Glutamate	C5H9NO4	R00021 R00093 R00114 R00239 R00241 R00243 R00245 R00248 R00250 R00251 R00253 R00254 R00256 R00257 R00258 R00259 R00260 R00261 R00262 R00263 R00355 R00372 R00411 R00457 R00494 R00525 R00573 R00575 R00578 R00609 R00667 R00668 R00684 R00694 R00707 R00708 R00734 R00768 R00894 R00895 R00908 R00942 R00986 R01072 R01090 R01155 R01161 R01214 R01231 R01339 R01585 R01586 R01648 R01654 R01684 R01716 R01939 …	ko00250 Alanine, aspartate and glutamate metabolism ko00330 Arginine and proline metabolism ko00340 Histidine metabolism ko00471 D-Glutamine and D-glutamate metabolism ko00480 Glutathione metabolism ko00524 Butirosin and neomycin biosynthesis ko00650 Butanoate metabolism ko00660 C5-Branched dibasic acid metabolism ko00860 Porphyrin and chlorophyll metabolism ko00910 Nitrogen metabolism ko00970 Am…	1.4.1.2 1.4.1.3 1.4.1.4 1.4.1.13 1.4.1.14 1.4.3.11 1.4.7.1 1.5.1.9 1.5.1.10 1.5.1.12 1.5.99.5 2.1.1.21 2.1.2.5 2.3.1.1 2.3.1.14 2.3.1.35 2.3.2.2 2.3.2.- 2.4.2.14 2.4.2.- 2.6.1.1 2.6.1.2 2.6.1.3 2.6.1.4 2.6.1.5 2.6.1.6 2.6.1.7 2.6.1.8 2.6.1.9 2.6.1.11 2.6.1.13 2.6.1.16 2.6.1.17 2.6.1.19 2.6.1.22 2.6.1.23 2.6.1.24 2.6.1.26 2.6.1.27 2.6.1.29 2.6.1.33 2.6.1.34 2.6.1.36 2.6.1.38 2.6.1.39 2.6.1.40 2.6.…	CAS: 56-86-0 PubChem: 3327 ChEBI: 16015 KNApSAcK: C00001358 3DMET: B00007 NIKKAJI: J9.171E
Metabolite_6781	600.415	600.418	4.6242	C08585	Capsorubin	C40H56O4	R07320	ko00906 Carotenoid biosynthesis	5.3.99.8	CAS: 470-38-2 PubChem: 10778 ChEBI: 3378 KNApSAcK: C00003764 3DMET: B02243 NIKKAJI: J5.936F
Metabolite_3125	300.062	300.063	4.25394	C04293	Chrysoeriol	C16H12O6	R03587	ko00944 Flavone and flavonol biosynthesis	2.1.1.42	CAS: 491-71-4 PubChem: 6953 ChEBI: 16514 KNApSAcK: C00001029 3DMET: B00699 NIKKAJI: J90.397C
Metabolite_4397	412.369	412.37	3.5804	C05108	14-Demethyllanosterol	C29H48O	R05639 R07499 R07509	ko00100 Steroid biosynthesis ko01100 Metabolic pathways	1.3.1.70 1.3.1.72 1.14.13.72	CAS: 7448-02-4 PubChem: 7534 ChEBI: 18364 LIPIDMAPS: LMST01010176 KNApSAcK: C00023776 3DMET: B04978 NIKKAJI: J14.903I
Metabolite_2919	286.229	286.23	2.71269	C00473	Retinol	C20H30O	R02124 R02366 R02367 R02368 R02369 R07163 R08379 R08387	ko00830 Retinol metabolism ko01100 Metabolic pathways	1.1.1.1 1.1.1.105 1.1.1.- 1.3.99.23 2.3.1.76 2.3.1.135 3.1.1.21 3.1.1.64 5.2.1.7	CAS: 68-26-8 11103-57-4 PubChem: 3756 ChEBI: 17336 LIPIDMAPS: LMPR01090000 LMPR01090001 LipidBank: VVA0001 PDB-CCD: RTL 3DMET: B01255 NIKKAJI: J1.417F J203.784J
Metabolite_2940	288.066	288.063	-8.41325	C00974	Dihydrokaempferol	C15H12O6	R02444 R03123 R03124 R03125 R03126 R06540	ko00941 Flavonoid biosynthesis map01061 Biosynthesis of phenylpropanoids ko01100 Metabolic pathways ko01110 Biosynthesis of secondary metabolites	1.1.1.219 1.14.11.9 1.14.11.19 1.14.11.23 1.14.13.21 1.14.13.88	CAS: 480-20-6 PubChem: 4223 ChEBI: 15401 KNApSAcK: C00007234 3DMET: B01364 NIKKAJI: J12.461C
Metabolite_746	148.053	148.052	-5.56255	C00423	trans-Cinnamate	C9H8O2	R00697 R01426 R02252 R02253 R02254 R02255 R02256 R06745 R06781 R06783 R07796 R08422 R08423	ko00360 Phenylalanine metabolism ko00940 Phenylpropanoid biosynthesis map01060 Biosynthesis of plant secondary metabolites map01070 Biosynthesis of plant hormones ko01100 Metabolic pathways ko01110 Biosynthesis of secondary metabolites	1.3.1.31 1.14.12.19 1.14.13.11 1.14.13.14 2.4.1.177 2.8.3.17 4.3.1.24 4.3.1.25 6.2.1.12	CAS: 140-10-3 PubChem: 3713 ChEBI: 35697 KNApSAcK: C00000170 PDB-CCD: TCA 3DMET: B00108 NIKKAJI: J2.024I
Metabolite_1255	182.057	182.058	4.81414	C03672	3-(4-Hydroxyphenyl)lactate	C9H10O4	R03336 R03338 R08766	ko00130 Ubiquinone and other terpenoid-quinone biosynthesis ko00350 Tyrosine metabolism ko01110 Biosynthesis of secondary metabolites	1.1.1.222 1.1.1.237 4.2.1.-	PubChem: 6448 ChEBI: 17385 3DMET: B04909 NIKKAJI: J70.493H
Metabolite_851	156.044	156.042	-7.84113	C04112	3-Methyl-cis,cis-hexadienedioate	C7H8O4	R05299 R05300 R09229	ko00623 Toluene degradation	1.13.11.1 5.5.1.1	PubChem: 6802 3DMET: B00680 NIKKAJI: J738.331B
Metabolite_1016	167.06	167.058	-9.11987	C00250	Pyridoxal	C8H9NO3	R00173 R00174 R01707 R01708 R01709 R01710 R01711 R01712 R01713 R05839	ko00750 Vitamin B6 metabolism ko01100 Metabolic pathways	1.1.1.65 1.1.1.107 1.1.3.12 1.2.3.1 1.2.3.8 1.4.3.5 2.6.1.30 2.6.1.31 2.6.1.54 2.7.1.35 3.1.3.74	CAS: 66-72-8 PubChem: 3549 ChEBI: 17310 KNApSAcK: C00007509 PDB-CCD: PXL 3DMET: B00072 NIKKAJI: J2.361B
Metabolite_1005	166.063	166.063	0.460378	C01198	3-(2-Hydroxyphenyl)propanoate	C9H10O3	R03369 R03692 R03709 R04899 R05537	ko00360 Phenylalanine metabolism ko00624 Polycyclic aromatic hydrocarbon degradation	1.3.1.11 1.14.13.4 3.1.1.35	CAS: 495-78-3 PubChem: 4423 ChEBI: 16104 46957 KNApSAcK: C00002756 3DMET: B00259 NIKKAJI: J6.083F
Metabolite_3034	292.201	292.204	9.84399	C01226	12-OPDA	C18H28O3	R03401 R03402	ko00592 alpha-Linolenic acid metabolism ko01100 Metabolic pathways	1.3.1.42 5.3.99.6	PubChem: 4448 ChEBI: 15560 KNApSAcK: C00000365 3DMET: B01414 NIKKAJI: J264.010D
Metabolite_356	122.074	122.073	-2.65044	C05853	Phenylethyl alcohol	C8H10O	R02611	ko00360 Phenylalanine metabolism	1.1.1.90	CAS: 60-12-8 PubChem: 8146 ChEBI: 49000 KNApSAcK: C00002663 PDB-CCD: PEL 3DMET: B00869 NIKKAJI: J1.924K
Metabolite_1196	180.044	180.046	6.53419	C03089	5-Methylthio-D-ribose	C6H12O4S	R01401 R04143	ko00270 Cysteine and methionine metabolism map01060 Biosynthesis of plant secondary metabolites ko01100 Metabolic pathways	2.7.1.100 3.2.2.9 3.2.2.16	PubChem: 5987 ChEBI: 16895 3DMET: B01630 NIKKAJI: J1.615.621C
Metabolite_1198	180.043	180.042	-5.68504	C01179	3-(4-Hydroxyphenyl)pyruvate	C9H8O4	R00042 R00729 R00734 R01728 R01730 R02521 R03336 R03337 R03338 R03339 R03341 R03342 R05778 R06626 R06632 R06757 R09254	ko00130 Ubiquinone and other terpenoid-quinone biosynthesis ko00350 Tyrosine metabolism ko00400 Phenylalanine, tyrosine and tryptophan biosynthesis ko00401 Novobiocin biosynthesis ko00950 Isoquinoline alkaloid biosynthesis ko01055 Biosynthesis of vancomycin group antibiotics map01060 Biosynthesis of plant secondary metabolites map01063 Biosynthesis of alkaloids derived from shikimate pathway ko01…	1.1.1.222 1.1.1.237 1.2.3.13 1.3.1.12 1.3.1.13 1.4.3.2 1.13.11.27 1.13.11.46 2.6.1.1 2.6.1.5 2.6.1.9 2.6.1.57 2.6.1.58 4.1.1.80 5.3.2.1	CAS: 156-39-8 PubChem: 4406 ChEBI: 15999 KNApSAcK: C00007512 PDB-CCD: ENO 3DMET: B00254 NIKKAJI: J101.877I
Metabolite_4129	384.341	384.339	-4.22426	C00599	Cholest-4-en-3-one	C27H44O	R01459 R02609 R02610	ko00100 Steroid biosynthesis	1.1.3.6 1.3.1.3 1.3.1.22	CAS: 601-57-0 PubChem: 3875 ChEBI: 16175 LIPIDMAPS: LMST01010015 LipidBank: SST9045 PDB-CCD: K2B 3DMET: B01291 NIKKAJI: J73F
Metabolite_717	146.106	146.106	-1.53005	C00047	L-Lysine	C6H14N2O2	R00445 R00446 R00447 R00448 R00449 R00451 R00452 R00453 R00454 R00457 R00458 R00459 R00460 R00461 R00462 R00463 R00545 R00612 R00715 R00716 R00910 R00911 R01077 R01396 R01620 R02786 R03095 R03658 R06845 R07598 R07646	ko00300 Lysine biosynthesis ko00310 Lysine degradation ko00780 Biotin metabolism ko00960 Tropane, piperidine and pyridine alkaloid biosynthesis ko00970 Aminoacyl-tRNA biosynthesis map01060 Biosynthesis of plant secondary metabolites map01064 Biosynthesis of alkaloids derived from ornithine, lysine and nicotinic acid ko01100 Metabolic pathways ko01110 Biosynthesis of secondary metabolites ko02010 …	1.4.1.15 1.4.1.18 1.4.3.14 1.4.3.20 1.5.1.7 1.5.1.8 1.5.1.16 1.5.3.4 1.13.12.2 1.14.13.59 2.1.3.8 2.3.1.32 2.3.1.- 2.6.1.36 2.6.1.71 3.4.13.4 3.5.1.12 3.5.1.17 3.5.1.- 3.5.2.11 4.1.1.18 4.1.1.20 5.1.1.5 5.1.1.9 5.4.3.2 6.1.1.6 6.1.1.25 6.3.2.7 6.3.2.11 6.3.2.20	CAS: 56-87-1 PubChem: 3349 ChEBI: 18019 KNApSAcK: C00001378 PDB-CCD: LYS 3DMET: B00013 NIKKAJI: J9.176F
Metabolite_423	129.042	129.043	2.91727	C01877	4-Oxoproline	C5H7NO3	R03290 R03292 R07146	ko00330 Arginine and proline metabolism	1.1.1.104	PubChem: 4991 ChEBI: 37011 PDB-CCD: DPL 3DMET: B04819 NIKKAJI: J205.723I
Metabolite_1105	174.032	174.033	5.03613	C16478	3-Fluorocyclohexadiene-cis,cis-1,2-diol-1-carboxylate	C7H7FO4	R08108 R08111	ko00364 Fluorobenzoate degradation	1.3.1.25 1.14.12.10	PubChem: 47205774 NIKKAJI: J2.802.674I
Metabolite_1812	212.086	212.084	-9.54127	C01745	Pinosylvin	C14H12O2	R02505	ko00945 Stilbenoid, diarylheptanoid and gingerol biosynthesis ko01110 Biosynthesis of secondary metabolites	2.3.1.146	CAS: 102-61-4 PubChem: 4879 ChEBI: 36011 LIPIDMAPS: LMPK13090001 KNApSAcK: C00002897 3DMET: B00340 NIKKAJI: J10.798K
Metabolite_3390	318.218	318.219	5.58247	C00909	Leukotriene A4	C20H30O3	R03057 R03058 R03059 R08527	ko00590 Arachidonic acid metabolism ko01100 Metabolic pathways map07034 Eicosanoids	1.13.11.34 3.3.2.6 4.4.1.20	CAS: 72059-45-1 PubChem: 4164 ChEBI: 15651 LIPIDMAPS: LMFA03020023 LipidBank: XPR3001 3DMET: B01350 NIKKAJI: J138.393K
Metabolite_3133	300.208	300.209	3.91878	C00777	Retinoate	C20H28O2	R02123 R02125 R02902 R08390 R08391 R08392	ko00830 Retinol metabolism ko01100 Metabolic pathways ko04672 Intestinal immune network for IgA production ko05200 Pathways in cancer ko05222 Small cell lung cancer ko05223 Non-small cell lung cancer	1.2.1.36 1.2.3.11 1.14.14.1 2.4.1.17	CAS: 302-79-4 PubChem: 4038 ChEBI: 15367 35291 LipidBank: VVA0018 PDB-CCD: REA 3DMET: B00172 NIKKAJI: J1.518K
Metabolite_625	142.025	142.027	9.69151	C00682	2-Hydroxymuconate semialdehyde	C6H6O4	R00816 R02604 R02762 R02763 R05504	ko00361 Chlorocyclohexane and chlorobenzene degradation ko00362 Benzoate degradation ko01100 Metabolic pathways	1.2.1.32 1.13.11.2 1.97.1.- 3.7.1.9	CAS: 3270-98-2 PubChem: 3951 ChEBI: 17236 3DMET: B00155
Metabolite_449	130.026	130.027	5.97148	C00433	2,5-Dioxopentanoate	C5H6O4	R00264 R02278 R02279 R02280 R09186 R09253	ko00040 Pentose and glucuronate interconversions ko00053 Ascorbate and aldarate metabolism ko00330 Arginine and proline metabolism ko01100 Metabolic pathways	1.2.1.3 1.2.1.26 3.5.4.22 4.2.1.41 4.2.1.43 4.2.1.-	PubChem: 3722 ChEBI: 17415 PDB-CCD: DO4 3DMET: B00112 NIKKAJI: J2.593.782A
Metabolite_562	138.032	138.032	-3.79296	C00156	4-Hydroxybenzoate	C7H6O3	R01238 R01293 R01294 R01295 R01296 R01297 R01298 R01299 R01300 R01301 R01302 R01303 R01304 R01305 R01306 R01307 R01308 R05000 R05603 R05615 R05616 R06889 R07273 R09039 R09040 R09105	ko00130 Ubiquinone and other terpenoid-quinone biosynthesis ko00360 Phenylalanine metabolism ko00362 Benzoate degradation ko00363 Bisphenol degradation ko00623 Toluene degradation ko00627 Aminobenzoate degradation map01061 Biosynthesis of phenylpropanoids ko01100 Metabolic pathways ko01110 Biosynthesis of secondary metabolites map07110 Benzoic acid family	1.2.1.7 1.2.1.28 1.2.1.64 1.13.11.41 1.13.-.- 1.14.13.2 1.14.13.12 1.14.13.33 1.14.13.64 1.14.99.15 1.14.99.- 2.4.1.194 2.5.1.39 2.5.1.- 3.1.1.- 3.1.2.23 3.2.1.- 3.8.1.6 4.1.1.61 4.1.3.40 6.2.1.27 6.4.1.-	CAS: 99-96-7 PubChem: 3456 ChEBI: 30763 KNApSAcK: C00000856 PDB-CCD: PHB 3DMET: B00045 NIKKAJI: J43.201F
Metabolite_1080	172.037	172.037	3.35074	C02637	3-Dehydroshikimate	C7H8O5	R01627 R02413 R02415 R03084 R06847	ko00400 Phenylalanine, tyrosine and tryptophan biosynthesis map01060 Biosynthesis of plant secondary metabolites map01061 Biosynthesis of phenylpropanoids map01063 Biosynthesis of alkaloids derived from shikimate pathway ko01100 Metabolic pathways ko01110 Biosynthesis of secondary metabolites	1.1.1.25 1.1.1.282 1.1.99.25 4.2.1.10 4.2.1.-	PubChem: 5617 ChEBI: 30918 KNApSAcK: C00019663 3DMET: B01592 NIKKAJI: J412.314J
Metabolite_344	122.037	122.037	-5.10951	C00180	Benzoate	C7H6O2	R01295 R01419 R01420 R01421 R01422 R01423 R01424 R01425 R01426 R01427 R02606 R05590 R05591 R05621 R05622 R06727 R06728 R07188 R07835 R08838 R09088	ko00360 Phenylalanine metabolism ko00362 Benzoate degradation ko00621 Dioxin degradation ko00623 Toluene degradation ko00627 Aminobenzoate degradation map01063 Biosynthesis of alkaloids derived from shikimate pathway ko01100 Metabolic pathways ko01110 Biosynthesis of secondary metabolites	1.2.1.7 1.2.1.28 1.14.12.10 1.14.13.12 1.14.13.- 3.1.1.1 3.1.1.84 3.5.1.4 3.5.1.32 3.5.1.40 3.5.5.1 3.6.1.7 3.6.1.20 3.7.1.8 6.2.1.25	CAS: 65-85-0 PubChem: 3480 ChEBI: 30746 KNApSAcK: C00000207 PDB-CCD: BEZ 3DMET: B00053 NIKKAJI: J2.358B
Metabolite_914	160.053	160.052	-2.64631	C03012	Naphthalene-1,2-diol	C10H8O2	R04115 R04117 R05632 R07015 R07017 R07020 R07698 R07699	ko00624 Polycyclic aromatic hydrocarbon degradation ko00626 Naphthalene degradation ko00980 Metabolism of xenobiotics by cytochrome P450 ko01100 Metabolic pathways	1.3.1.20 1.3.1.29 1.13.11.- 1.14.13.1 1.14.14.1 1.14.99.-	CAS: 574-00-5 PubChem: 5919 ChEBI: 17435 PDB-CCD: D1N 3DMET: B00527 NIKKAJI: J135.090K
Metabolite_4488	422.086	422.082	-8.11109	C00689	alpha,alpha'-Trehalose 6-phosphate	C12H23O14P	R00836 R00837 R02168 R02737 R02778 R02780 R05767	ko00500 Starch and sucrose metabolism ko02060 Phosphotransferase system (PTS)	2.4.1.15 2.4.1.36 2.4.1.216 2.7.1.69 3.1.3.12 3.2.1.93 3.2.1.122	CAS: 4484-88-2 PubChem: 3958 ChEBI: 18283 KNApSAcK: C00007451 3DMET: B01312 NIKKAJI: J741.923F
Metabolite_54	89.0476	89.0477	0.858548	C00041	L-Alanine	C3H7NO2	R00258 R00369 R00396 R00397 R00398 R00400 R00401 R00453 R00576 R00585 R00692 R00863 R00907 R00987 R01215 R01261 R01712 R02050 R02271 R02293 R02668 R02970 R03001 R03038 R03193 R03210 R03502 R03598 R03599 R03854 R03936 R04112 R04152 R04187 R05652 R07460 R08197 R08714 R08872 R09048 R09254	ko00250 Alanine, aspartate and glutamate metabolism ko00270 Cysteine and methionine metabolism ko00430 Taurine and hypotaurine metabolism ko00450 Selenoamino acid metabolism ko00473 D-Alanine metabolism ko00710 Carbon fixation in photosynthetic organisms ko00720 Reductive carboxylate cycle (CO2 fixation) ko00970 Aminoacyl-tRNA biosynthesis map01060 Biosynthesis of plant secondary metabolites ko01…	1.4.1.1 1.5.1.17 2.3.1.47 2.6.1.2 2.6.1.12 2.6.1.15 2.6.1.18 2.6.1.30 2.6.1.37 2.6.1.40 2.6.1.41 2.6.1.43 2.6.1.44 2.6.1.46 2.6.1.47 2.6.1.51 2.6.1.56 2.6.1.58 2.6.1.66 2.6.1.71 2.6.1.77 2.6.1.84 2.6.1.- 2.8.1.7 3.5.1.28 3.7.1.3 4.1.1.12 4.1.1.64 4.4.1.16 5.1.1.1 6.1.1.7 6.3.2.8	CAS: 56-41-7 PubChem: 3343 ChEBI: 16977 KNApSAcK: C00001332 PDB-CCD: ALA 3DMET: B00011 NIKKAJI: J9.168E
Metabolite_2656	270.055	270.053	-7.86346	C01477	Apigenin	C15H10O5	R02445 R03571 R03574 R06537 R06559 R06792 R06822 R06825	ko00941 Flavonoid biosynthesis ko00943 Isoflavonoid biosynthesis ko00944 Flavone and flavonol biosynthesis map01061 Biosynthesis of phenylpropanoids ko01100 Metabolic pathways ko01110 Biosynthesis of secondary metabolites	1.14.11.22 1.14.13.21 1.14.13.86 1.14.13.88 2.1.1.75 2.4.1.81	CAS: 520-36-5 PubChem: 4649 ChEBI: 18388 LIPIDMAPS: LMPK12110005 KNApSAcK: C00003817 PDB-CCD: AGI 3DMET: B00300 NIKKAJI: J6.601J
Metabolite_1053	170.059	170.058	-7.78293	C05576	3,4-Dihydroxyphenylethyleneglycol	C8H10O4	R04880 R04881	ko00350 Tyrosine metabolism ko01100 Metabolic pathways	1.1.1.1 2.1.1.6	PubChem: 7902 3DMET: B05073 NIKKAJI: J45.947J
Metabolite_1682	207.055	207.056	5.68179	C14876	S-(2-Hydroxyethyl)-N-acetyl-L-cysteine	C7H13NO4S	R07118	ko00980 Metabolism of xenobiotics by cytochrome P450	0	CAS: 15060-26-1 PubChem: 17395874 NIKKAJI: J410.590G
Metabolite_3232	307.085	307.084	-2.35619	C12392	Stealthin C	C18H13NO4	R06672 R06673	ko01057 Biosynthesis of type II polyketide products ko01110 Biosynthesis of secondary metabolites	0	PubChem: 582782 3DMET: B05634 NIKKAJI: J767.638G
Metabolite_1000	166.028	166.027	-7.97191	C01606	Phthalate	C8H6O4	R03630 R05167 R05643 R07703 R07802 R09227	ko00624 Polycyclic aromatic hydrocarbon degradation ko01100 Metabolic pathways	1.2.1.- 1.3.1.19 1.14.12.7 1.14.12.- 3.5.1.79 3.7.1.-	CAS: 88-99-3 PubChem: 4759 ChEBI: 29069 PDB-CCD: PHT 3DMET: B00332 NIKKAJI: J3.547E
Metabolite_3654	338.246	338.246	-1.25219	C06088	Aphidicolin	C20H34O4	R06316 R06317	ko00904 Diterpenoid biosynthesis ko01110 Biosynthesis of secondary metabolites	0	CAS: 38966-21-1 PubChem: 8354 KNApSAcK: C00000873 C00023944 NIKKAJI: J19.324K
Metabolite_1939	222.056	222.056	-0.556383	C17214	2-(3'-Methylthio)propylmalic acid	C8H14O5S	R08623 R08624	ko00966 Glucosinolate biosynthesis	2.3.3.- 5.4.4.-	PubChem: 96023622 KNApSAcK: C00007646 NIKKAJI: J2.805.984A
Metabolite_3348	316.203	316.204	2.45554	C06093	Gibberellin A12 aldehyde	C20H28O3	R06295 R06297 R06328 R06341	ko00904 Diterpenoid biosynthesis map01070 Biosynthesis of plant hormones ko01110 Biosynthesis of secondary metabolites	1.14.13.79	CAS: 19436-07-8 PubChem: 8359 ChEBI: 15610 LIPIDMAPS: LMPR0104170006 LMPR0104170040 KNApSAcK: C00000886 3DMET: B05161 NIKKAJI: J555.881F
Metabolite_4853	448.097	448.101	9.09718	C03951	Luteolin 7-O-beta-D-glucoside	C21H20O11	R03588 R06829	ko00944 Flavone and flavonol biosynthesis	2.4.1.81 2.4.1.236	CAS: 5373-11-5 PubChem: 6673 ChEBI: 27994 KNApSAcK: C00004266 3DMET: B01704 NIKKAJI: J94.450E
Metabolite_383	126.032	126.032	-4.94755	C01108	1,2,3-Trihydroxybenzene	C6H6O3	R03246 R03247 R04297 R05250	ko00627 Aminobenzoate degradation map07216 Catecholamine transferase inhibitors	1.13.11.35 1.97.1.2 4.1.1.59	CAS: 87-66-1 PubChem: 4340 ChEBI: 16164 KNApSAcK: C00002670 PDB-CCD: PYG 3DMET: B00240 NIKKAJI: J3.903I
Metabolite_470	131.096	131.095	-9.33332	C00123	L-Leucine	C6H13NO2	R01088 R01089 R01090 R01091 R02552 R03657 R08411 R08664	ko00280 Valine, leucine and isoleucine degradation ko00290 Valine, leucine and isoleucine biosynthesis ko00966 Glucosinolate biosynthesis ko00970 Aminoacyl-tRNA biosynthesis map01060 Biosynthesis of plant secondary metabolites map01065 Biosynthesis of alkaloids derived from histidine and purine ko01100 Metabolic pathways ko01110 Biosynthesis of secondary metabolites ko02010 ABC transporters ko049…	1.4.1.9 1.14.13.- 2.3.1.66 2.6.1.6 2.6.1.42 2.6.1.67 3.4.13.18 (I) 3.5.1.64 5.4.3.7 6.1.1.4	CAS: 61-90-5 PubChem: 3423 ChEBI: 15603 KNApSAcK: C00001377 PDB-CCD: LEU 3DMET: B00034 NIKKAJI: J1.167C
Metabolite_3230	307.087	307.088	1.55152	C14796	(1R)-Hydroxy-(2R)-N-acetyl-L-cysteinyl-1,2-dihydronaphthalene	C15H17NO4S	R07005	ko00980 Metabolism of xenobiotics by cytochrome P450	0	PubChem: 17395794 NIKKAJI: J564.066K
Metabolite_3515	330.15	330.147	-8.8553	C11854	Gibberellin A51-catabolite	C19H22O5	R06343	ko00904 Diterpenoid biosynthesis	1.14.11.13	PubChem: 14016 LIPIDMAPS: LMPR0104170011 3DMET: B04333 NIKKAJI: J2.777.633G
Metabolite_716	146.069	146.069	2.57722	C00064	L-Glutamine	C5H10N2O3	R00021 R00093 R00114 R00253 R00256 R00257 R00573 R00575 R00576 R00577 R00578 R00579 R00768 R00986 R01072 R01149 R01231 R01375 R01716 R02576 R02781 R02895 R03652 R03905 R04011 R04212 R04463 R04558 R05224 R05225 R05815 R07456 R08244 R08855 R08890 R08891 R08897 R08903 R08956 R09195	ko00230 Purine metabolism ko00240 Pyrimidine metabolism ko00250 Alanine, aspartate and glutamate metabolism ko00330 Arginine and proline metabolism ko00471 D-Glutamine and D-glutamate metabolism ko00910 Nitrogen metabolism ko00970 Aminoacyl-tRNA biosynthesis map01060 Biosynthesis of plant secondary metabolites ko01100 Metabolic pathways ko02010 ABC transporters ko02020 Two-component system ko0496…	1.4.1.13 1.4.1.14 1.4.7.1 2.3.1.14 2.3.1.68 2.3.2.1 2.3.2.14 2.4.2.14 2.4.2.- 2.6.1.15 2.6.1.16 2.6.1.50 2.6.1.64 2.6.1.85 2.6.1.86 2.6.1.- 3.5.1.2 3.5.1.38 4.1.3.27 4.1.3.- 5.1.1.9 5.1.1.10 6.1.1.18 6.3.1.2 6.3.1.- 6.3.4.2 6.3.5.1 6.3.5.2 6.3.5.3 6.3.5.4 6.3.5.5 6.3.5.6 6.3.5.7 6.3.5.9 6.3.5.10 6.3.5.-	CAS: 56-85-9 PubChem: 3364 ChEBI: 18050 KNApSAcK: C00001359 PDB-CCD: GLN 3DMET: B00017 NIKKAJI: J9.170G
Metabolite_1680	207.054	207.053	-3.97747	C01252	4-(2-Aminophenyl)-2,4-dioxobutanoate	C10H9NO4	R01956 R01957 R03445	ko00380 Tryptophan metabolism ko01100 Metabolic pathways	2.6.1.7 2.6.1.63	PubChem: 4472 ChEBI: 17442 3DMET: B00265 NIKKAJI: J1.771.656E
Metabolite_5605	504.171	504.169	-3.41859	C00492	Raffinose	C18H32O16	R00039 R01103 R02410 R02411 R03418 R03634 R08616	ko00052 Galactose metabolism	2.4.1.67 2.4.1.82 2.4.1.166 3.2.1.22 3.2.1.26	CAS: 512-69-6 PubChem: 3775 ChEBI: 16634 KNApSAcK: C00001145 PDB-CCD: RAF 3DMET: B01266 NIKKAJI: J9.760H
Metabolite_480	132.057	132.058	2.09342	C00903	Cinnamaldehyde	C9H8O	R02506 R03054	ko00940 Phenylpropanoid biosynthesis map01060 Biosynthesis of plant secondary metabolites ko01100 Metabolic pathways ko01110 Biosynthesis of secondary metabolites	1.1.1.195 1.2.1.44	CAS: 104-55-2 PubChem: 4158 ChEBI: 16731 KNApSAcK: C00002725 3DMET: B00198 NIKKAJI: J2.850I
Metabolite_1481	194.08	194.079	-3.21286	C03619	Methyl beta-D-galactoside	C7H14O6	R04270 R06118	ko02010 ABC transporters	3.2.1.63	CAS: 1824-94-8 PubChem: 6403 ChEBI: 17540 PDB-CCD: MBG NIKKAJI: J150.777J
[truncated: 501 more rows]
