# Supplementary material for: Gene-Metabolite Network Analysis Revealed Tissue-Specific Accumulation of Therapeutic Metabolites in Mallotus japonicus
Source: Int J Mol Sci. 2021 Aug 17;22(16):8835. doi: 10.3390/ijms22168835 (PMC8396295; doi:10.3390/ijms22168835)
Supplement: Supplementary file 1 [file ijms-22-08835-s001.zip › Supplementary_Table S3_FBMN_for_positive_and_negative_ion_mode with legend.xlsx]

## Sheet: FBMN_positive_ion_mode
Table S3 Feature-based molecular networking (FBMN) for the acquired metabolome dataset.
SpectrumID	Compound_Name	Ion_Source	Instrument	Compound_Source	PI	Data_Collector	Adduct	Precursor_MZ	ExactMass	Charge	CAS_Number	Pubmed_ID	Smiles	INCHI	INCHI_AUX	Library_Class	IonMode	UpdateWorkflowName	LibraryQualityString	#Scan#	SpectrumFile	LibraryName	MQScore	Organism	TIC_Query	RT_Query	MZErrorPPM	SharedPeaks	MassDiff	LibMZ	SpecMZ	SpecCharge	FileScanUniqueID	NumberHits	tags	MoleculeExplorerDatasets	MoleculeExplorerFiles	InChIKey	InChIKey-Planar	superclass	class	subclass	npclassifier_superclass	npclassifier_class	npclassifier_pathway
CCMSLIB00000221579	Massbank:PB000202 Quercetin|2-(3,4-dihydroxyphenyl)-3,5,7-trihydroxychromen-4-one	ESI	LC-ESI-QTOF	Isolated	Putative Massbank Match	Massbank	[M+H]+	303.05	0	1	N/A	N/A	C1=CC(=C(C=C1C2=C(C(=O)C3=C(C=C(C=C3O2)O)O)O)O)O	1S/C15H10O7/c16-7-4-10(19)12-11(5-7)22-15(14(21)13(12)20)6-1-2-8(17)9(18)3-6/h1-5,16-19,21H	N/A	3	Positive	UPDATE-SINGLE-ANNOTATED-BRONZE	Bronze	1015	spectra_filtered/specs_ms.mgf	lib-00004.mgf	0.824503	MASSBANK	1832	0	50.8542	12	0.0154114	303.05	303.065	1	spectra_filtered/specs_ms.mgf1015	1		5	38	REFJWTPEDVJJIY-UHFFFAOYSA-N	REFJWTPEDVJJIY	Phenylpropanoids and polyketides	Flavonoids	Flavones	Flavonols	Flavonols	Shikimates and Phenylpropanoids
CCMSLIB00003136399	Spectral Match to Glutathione, oxidized from NIST14	ESI	Q-TOF	Isolated	Data from Gabriel Haddad	Data deposited by mjmeehan	M+2H]	307.083	0	1	27025418	N/A	N/A	N/A	N/A	3	Positive	UPDATE-SINGLE-ANNOTATED-BRONZE	Bronze	1032	spectra_filtered/specs_ms.mgf	lib-00036.mgf	0.509062	GNPS-NIST14-MATCHES	537	0	51.0808	7	0.015686	307.083	307.099	1	spectra_filtered/specs_ms.mgf1032	1		28	1677	N/A	N/A	N/A	N/A	N/A	N/A	N/A	N/A
CCMSLIB00003137533	Spectral Match to Sucrose from NIST14	ESI	Q-TOF	Isolated	Data from Suryasarathi Dasgupta	Data deposited by fevargas	M+H-H2O	325.113	0	1	57501	N/A	N/A	N/A	N/A	3	Positive	UPDATE-SINGLE-ANNOTATED-BRONZE	Bronze	1098	spectra_filtered/specs_ms.mgf	lib-00036.mgf	0.689944	GNPS-NIST14-MATCHES	481	0	48.6234	5	0.0158081	325.113	325.129	1	spectra_filtered/specs_ms.mgf1098	1		20	826	N/A	N/A	N/A	N/A	N/A	N/A	N/A	N/A
CCMSLIB00003137533	Spectral Match to Sucrose from NIST14	ESI	Q-TOF	Isolated	Data from Suryasarathi Dasgupta	Data deposited by fevargas	M+H-H2O	325.113	0	1	57501	N/A	N/A	N/A	N/A	3	Positive	UPDATE-SINGLE-ANNOTATED-BRONZE	Bronze	1099	spectra_filtered/specs_ms.mgf	lib-00036.mgf	0.619993	GNPS-NIST14-MATCHES	106	0	52.8475	3	0.0171814	325.113	325.13	1	spectra_filtered/specs_ms.mgf1099	1		20	826	N/A	N/A	N/A	N/A	N/A	N/A	N/A	N/A
CCMSLIB00004716855	Bergenin	N/A	ESI-QFT	isolated	MoNA	MoNA:VF-NPL-QEHF025792	[M+H]+	329.087	0	1	N/A	N/A	N/A	InChI=1S/C14H16O9/c1-21-11-5(16)2-4-7(9(11)18)12-13(23-14(4)20)10(19)8(17)6(3-15)22-12/h2,6,8,10,12-13,15-19H,3H2,1H3/t6-,8-,10+,12+,13-/m1/s1	N/A	3	positive	UPDATE-SINGLE-ANNOTATED-BRONZE	Bronze	1109	spectra_filtered/specs_ms.mgf	lib-00032.mgf	0.62554	MONA	9407	0	48.3144	8	0.0158997	329.087	329.103	1	spectra_filtered/specs_ms.mgf1109	1		2	129	YWJXCIXBAKGUKZ-HJJNZUOJSA-N	YWJXCIXBAKGUKZ	Benzenoids	Benzene and substituted derivatives	Benzoic acids and derivatives	N/A	N/A	N/A
CCMSLIB00000855373	NCGC00180744-03_C19H24O6_Naphtho[2,3-b]furan-9(4H)-one, 4,8-bis(acetyloxy)-4a,5,6,7,8,8a-hexahydro-3,4a,5-trimethyl-, (4S,4aR,5S,8S,8aS)-	LC-ESI	Maxis II HD Q-TOF Bruker	isolated	Jadhav/Dorrestein	lfnothias	M-H2O+H	331.153	348.157	1	n/a	n/a	C[C@H]1CC[C@H](OC(C)=O)[C@H]2C(=O)C3=C([C@@H](OC(C)=O)[C@]12C)C(=CO3)C	InChI=1S/C19H24O6/c1-9-8-23-17-14(9)18(25-12(4)21)19(5)10(2)6-7-13(24-11(3)20)15(19)16(17)22/h8,10,13,15,18H,6-7H2,1-5H3/t10-,13-,15-,18+,19+/m0/s1	N/A	1	positive	UPDATE-SINGLE-ANNOTATED-GOLD	Gold	1131	spectra_filtered/specs_ms.mgf	lib-00002.mgf	0.536456	GNPS-NIH-NATURALPRODUCTSLIBRARY_ROUND2_POSITIVE	759	0	53.0816	6	0.0175781	331.153	331.171	1	spectra_filtered/specs_ms.mgf1131	1		20	1137	FBUJYYRONHLNQF-JTGGRASYSA-N	FBUJYYRONHLNQF	Lipids and lipid-like molecules	Prenol lipids	Sesquiterpenoids	Eremophilane sesquiterpenoids	Eremophilane sesquiterpenoids	Terpenoids
CCMSLIB00000855373	NCGC00180744-03_C19H24O6_Naphtho[2,3-b]furan-9(4H)-one, 4,8-bis(acetyloxy)-4a,5,6,7,8,8a-hexahydro-3,4a,5-trimethyl-, (4S,4aR,5S,8S,8aS)-	LC-ESI	Maxis II HD Q-TOF Bruker	isolated	Jadhav/Dorrestein	lfnothias	M-H2O+H	331.153	348.157	1	n/a	n/a	C[C@H]1CC[C@H](OC(C)=O)[C@H]2C(=O)C3=C([C@@H](OC(C)=O)[C@]12C)C(=CO3)C	InChI=1S/C19H24O6/c1-9-8-23-17-14(9)18(25-12(4)21)19(5)10(2)6-7-13(24-11(3)20)15(19)16(17)22/h8,10,13,15,18H,6-7H2,1-5H3/t10-,13-,15-,18+,19+/m0/s1	N/A	1	positive	UPDATE-SINGLE-ANNOTATED-GOLD	Gold	1133	spectra_filtered/specs_ms.mgf	lib-00002.mgf	0.563238	GNPS-NIH-NATURALPRODUCTSLIBRARY_ROUND2_POSITIVE	631	0	58.7952	6	0.0194702	331.153	331.172	1	spectra_filtered/specs_ms.mgf1133	1		20	1137	FBUJYYRONHLNQF-JTGGRASYSA-N	FBUJYYRONHLNQF	Lipids and lipid-like molecules	Prenol lipids	Sesquiterpenoids	Eremophilane sesquiterpenoids	Eremophilane sesquiterpenoids	Terpenoids
CCMSLIB00003135293	Spectral Match to Lactose from NIST14	ESI	Q-TOF	Isolated	Data from Julia Gauglitz	Data deposited by fevargas	M+H	343.124	0	1	63423	N/A	N/A	N/A	N/A	3	Positive	UPDATE-SINGLE-ANNOTATED-BRONZE	Bronze	1179	spectra_filtered/specs_ms.mgf	lib-00036.mgf	0.781439	GNPS-NIST14-MATCHES	271	0	49.273	7	0.0169067	343.124	343.141	1	spectra_filtered/specs_ms.mgf1179	1		3	12	N/A	N/A	N/A	N/A	N/A	N/A	N/A	N/A
CCMSLIB00004720107	Undulatoside A	N/A	ESI-QTOF	isolated	MoNA	MoNA:VF-NPL-QTOF002280	[M+H]+	355.102	0	1	N/A	N/A	N/A	InChI=1S/C16H18O9/c1-6-2-8(18)12-9(19)3-7(4-10(12)23-6)24-16-15(22)14(21)13(20)11(5-17)25-16/h2-4,11,13-17,19-22H,5H2,1H3/t11-,13-,14+,15-,16-/m1/s1	N/A	3	positive	UPDATE-SINGLE-ANNOTATED-BRONZE	Bronze	1227	spectra_filtered/specs_ms.mgf	lib-00032.mgf	0.952952	MONA	3118	0	55.7753	3	0.0198059	355.102	355.122	1	spectra_filtered/specs_ms.mgf1227	1		0	0	BYYDEEAJCDGLER-YMILTQATSA-N	BYYDEEAJCDGLER	Organic oxygen compounds	Organooxygen compounds	Carbohydrates and carbohydrate conjugates	N/A	N/A	N/A
CCMSLIB00004697962	8-hydroxy-6-methoxy-7-[(2S,3R,4S,5S,6R)-3,4,5-trihydroxy-6-(hydroxymethyl)oxan-2-yl]oxychromen-2-one	N/A	ESI-QFT	isolated	MoNA	MoNA:VF-NPL-QEHF006899	[M+H]+	371.097	0	1	N/A	N/A	N/A	InChI=1S/C16H18O10/c1-23-7-4-6-2-3-9(18)25-14(6)13(22)15(7)26-16-12(21)11(20)10(19)8(5-17)24-16/h2-4,8,10-12,16-17,19-22H,5H2,1H3/t8-,10-,11+,12-,16+/m1/s1	N/A	3	positive	UPDATE-SINGLE-ANNOTATED-BRONZE	Bronze	1261	spectra_filtered/specs_ms.mgf	lib-00032.mgf	0.698076	MONA	448	0	51.4798	3	0.019104	371.097	371.116	1	spectra_filtered/specs_ms.mgf1261	1		0	0	RVWWDDKOKZXKCJ-ZOLYHUHESA-N	RVWWDDKOKZXKCJ	Phenylpropanoids and polyketides	Coumarins and derivatives	Coumarin glycosides	N/A	N/A	N/A
CCMSLIB00004697961	8-hydroxy-6-methoxy-7-[(2S,3R,4S,5S,6R)-3,4,5-trihydroxy-6-(hydroxymethyl)oxan-2-yl]oxychromen-2-one	N/A	ESI-QFT	isolated	MoNA	MoNA:VF-NPL-QEHF006898	[M+H]+	371.097	0	1	N/A	N/A	N/A	InChI=1S/C16H18O10/c1-23-7-4-6-2-3-9(18)25-14(6)13(22)15(7)26-16-12(21)11(20)10(19)8(5-17)24-16/h2-4,8,10-12,16-17,19-22H,5H2,1H3/t8-,10-,11+,12-,16+/m1/s1	N/A	3	positive	UPDATE-SINGLE-ANNOTATED-BRONZE	Bronze	1262	spectra_filtered/specs_ms.mgf	lib-00032.mgf	0.709323	MONA	890	0	52.5489	3	0.0195007	371.097	371.116	1	spectra_filtered/specs_ms.mgf1262	1		0	0	RVWWDDKOKZXKCJ-ZOLYHUHESA-N	RVWWDDKOKZXKCJ	Phenylpropanoids and polyketides	Coumarins and derivatives	Coumarin glycosides	N/A	N/A	N/A
CCMSLIB00003136233	Spectral Match to Arctigenin from NIST14	ESI	HCD	Isolated	Data from Pieter Dorrestein;Ajit Jadhav	Data deposited by lfnothias	M+H	373.168	0	1	7770787	N/A	N/A	N/A	N/A	3	Positive	UPDATE-SINGLE-ANNOTATED-BRONZE	Bronze	1266	spectra_filtered/specs_ms.mgf	lib-00036.mgf	0.572186	GNPS-NIST14-MATCHES	178	0	34.8382	3	0.0130005	373.168	373.181	1	spectra_filtered/specs_ms.mgf1266	1		6	30	N/A	N/A	N/A	N/A	N/A	N/A	N/A	N/A
CCMSLIB00005467722	Succinoadenosine	LC-ESI	qTof	Isolated	Claudia Maier	Armando Alcazar	M+H	384.12	0	1						3	Positive	UPDATE-SINGLE-ANNOTATED-BRONZE	Bronze	1305	spectra_filtered/specs_ms.mgf	lib-00014.mgf	0.606012	GNPS-LIBRARY	518	0	39.0884	5	0.0150146	384.12	384.135	1	spectra_filtered/specs_ms.mgf1305	1		0	0	N/A	N/A	N/A	N/A	N/A	N/A	N/A	N/A
CCMSLIB00000579261	icariside B5	LC-ESI	qTof	Isolated	TJ Ling	TJ Ling	M+H	389.216	388.21	1	114226-08-3		CC([C@@](CC[C@H](O[C@H]1[C@H](O)[C@@H](O)[C@H](O)[C@@H](CO)O1)C)(O)C(C)(C)C2)=CC2=O			3	Positive	UPDATE-SINGLE-ANNOTATED-BRONZE	Bronze	1329	spectra_filtered/specs_ms.mgf	lib-00014.mgf	0.687431	GNPS-LIBRARY	532	0	47.2799	6	0.0184021	389.216	389.234	1	spectra_filtered/specs_ms.mgf1329	1		4	67	CZYPGTRKJFYXLT-SUHXYMONSA-N	CZYPGTRKJFYXLT	Lipids and lipid-like molecules	Fatty Acyls	Fatty acyl glycosides	Apocarotenoids(ﾎｵ-)|Megastigmanes	Apocarotenoids(ﾎｵ-)|Megastigmanes	Terpenoids
CCMSLIB00005723192	NCGC00380634-01!2,3,4,9,10-pentamethoxy-6a,11a-dihydro-6H-[1]benzofuro[3,2-c]chromen-8-ol [IIN-based: Match]	LC-ESI	Orbitrap	Commercial	Pieter Dorrestein	lfnothias/robinschmid	[M+H]+	391.139	390.131	1	N/A	N/A	COC1=C(OC)C(OC)=C2OCC3C(OC4=C3C=C(O)C(OC)=C4OC)C2=C1	InChI=1S/C20H22O8/c1-22-13-7-10-14-11(8-27-15(10)19(25-4)18(13)24-3)9-6-12(21)17(23-2)20(26-5)16(9)28-14/h6-7,11,14,21H,8H2,1-5H3	N/A	3	Positive	UPDATE-SINGLE-ANNOTATED-BRONZE	Bronze	1331	spectra_filtered/specs_ms.mgf	lib-00002.mgf	0.580776	GNPS-NIH-NATURALPRODUCTSLIBRARY_ROUND2_POSITIVE	1420	0	50.3244	3	0.0196838	391.139	391.119	1	spectra_filtered/specs_ms.mgf1331	1		0	0	YBVIOLRRXMAGAE-UHFFFAOYSA-N	YBVIOLRRXMAGAE	Phenylpropanoids and polyketides	Isoflavonoids	Furanoisoflavonoids	Pterocarpan	Pterocarpan	Shikimates and Phenylpropanoids
CCMSLIB00004714872	Abruquinone B	N/A	ESI-QFT	isolated	MoNA	MoNA:VF-NPL-QEHF023809	[M+H]+	391.139	0	1	N/A	N/A	N/A	InChI=1S/C20H22O8/c1-23-14-7-10-6-11(9-28-16(10)20(27-5)18(14)25-3)12-8-13(21)17(24-2)19(26-4)15(12)22/h7-8,11H,6,9H2,1-5H3	N/A	3	positive	UPDATE-SINGLE-ANNOTATED-BRONZE	Bronze	1332	spectra_filtered/specs_ms.mgf	lib-00032.mgf	0.655727	MONA	2424	0	43.2244	5	0.0169067	391.139	391.122	1	spectra_filtered/specs_ms.mgf1332	1		0	0	TZOHVRDKXUMVIU-UHFFFAOYSA-N	TZOHVRDKXUMVIU	Phenylpropanoids and polyketides	Isoflavonoids	Isoflavanquinones	N/A	N/A	N/A
CCMSLIB00000577910	L-ASPARAGINE	LC-ESI	Q-Exactive Plus	Commercial standard	Alexandrov Theodore	Prasad	M+H	133.06	132.053	0	70-47-3	6267	O=C(N)CC(N)C(=O)O	N/A	N/A	1	Positive	UPDATE-SINGLE-ANNOTATED-GOLD	Gold	142	spectra_filtered/specs_ms.mgf	lib-00017.mgf	0.78976	GNPS-EMBL-MCF	427	0	6.07783	3	0.000808716	133.06	133.061	1	spectra_filtered/specs_ms.mgf142	1		0	0	DCXYFEDJOCDNAF-UHFFFAOYSA-N	DCXYFEDJOCDNAF	Organic acids and derivatives	Carboxylic acids and derivatives	Amino acids, peptides, and analogues	Aminoacids	Aminoacids	Amino acids and Peptides
CCMSLIB00000847004	NCGC00385259-01!3-[(2S,3R,4R,5S)-3,4-dihydroxy-5-(hydroxymethyl)oxolan-2-yl]oxy-2-(3,4-dihydroxyphenyl)-5,7-dihydroxychromen-4-one	LC-ESI	Maxis II HD Q-TOF Bruker	isolated	Jadhav/Dorrestein	lfnothias	M+H	435.092	434.085	1	n/a	n/a	OC[C@@H]1O[C@@H](OC2=C(OC3=CC(O)=CC(O)=C3C2=O)C4=CC(O)=C(O)C=C4)[C@H](O)[C@H]1O	InChI=1S/C20H18O11/c21-6-13-15(26)17(28)20(30-13)31-19-16(27)14-11(25)4-8(22)5-12(14)29-18(19)7-1-2-9(23)10(24)3-7/h1-5,13,15,17,20-26,28H,6H2/t13-,15-,17+,20-/m0/s1	N/A	1	positive	UPDATE-SINGLE-ANNOTATED-GOLD	Gold	1447	spectra_filtered/specs_ms.mgf	lib-00002.mgf	0.778587	GNPS-NIH-NATURALPRODUCTSLIBRARY_ROUND2_POSITIVE	316	0	4.55913	3	0.00198364	435.092	435.094	1	spectra_filtered/specs_ms.mgf1447	1		6	42	BDCDNTVZSILEOY-UXYNSRGZSA-N	BDCDNTVZSILEOY	Phenylpropanoids and polyketides	Flavonoids	Flavonoid glycosides	Flavonols	Flavonols	Shikimates and Phenylpropanoids
CCMSLIB00003137472	Spectral Match to (-)-Catechin gallate from NIST14	ESI	Q-TOF	Isolated	Data from Pieter Dorrestein;Ajit Jadhav	Data deposited by lfnothias	M+H	443.104	0	1	130405402	N/A	N/A	N/A	N/A	3	Positive	UPDATE-SINGLE-ANNOTATED-BRONZE	Bronze	1489	spectra_filtered/specs_ms.mgf	lib-00036.mgf	0.636536	GNPS-NIST14-MATCHES	500	0	41.9432	6	0.0185852	443.104	443.123	1	spectra_filtered/specs_ms.mgf1489	1		18	613	N/A	N/A	N/A	N/A	N/A	N/A	N/A	N/A
CCMSLIB00000214488	Massbank:FIO00580 Quercitrin	ESI	LC-ESI-QTOF	Isolated	Putative Massbank Match	Massbank	[M+H]+	449.108	0	1	522-12-3	N/A	Oc(c4)c(O)cc(c4)C(O1)=C(O[C@H](O3)[C@H](O)[C@H](O)[C@@H](O)[C@H](C)3)C(=O)c(c(O)2)c(cc(O)c2)1	1S/C21H20O11/c1-7-15(26)17(28)18(29)21(30-7)32-20-16(27)14-12(25)5-9(22)6-13(14)31-19(20)8-2-3-10(23)11(24)4-8/h2-7,15,17-18,21-26,28-29H,1H3/t7-,15-,17+,18+,21-/m0/s1	N/A	3	Positive	UPDATE-SINGLE-ANNOTATED-BRONZE	Bronze	1514	spectra_filtered/specs_ms.mgf	lib-00004.mgf	0.904294	MASSBANK	817	0	37.3733	5	0.0167847	449.108	449.125	1	spectra_filtered/specs_ms.mgf1514	1		1	5	OXGUCUVFOIWWQJ-HQBVPOQASA-N	OXGUCUVFOIWWQJ	Phenylpropanoids and polyketides	Flavonoids	Flavonoid glycosides	Flavonols	Flavonols	Shikimates and Phenylpropanoids
CCMSLIB00000085852	MLS002207177-01!Quercitrin hydrate208-322-5	LC-ESI	qTof	NIH Pharmacologically Active Library	Dorrestein	VP/LMS	M+H	449.111	448.101	1	N/A	N/A	C[C@@H]1O[C@@H](Oc2c(oc3cc(O)cc(O)c3c2=O)c4ccc(O)c(O)c4)[C@H](O)[C@H](O)[C@H]1O.O	N/A	N/A	1	Positive	UPDATE-SINGLE-ANNOTATED-GOLD	Gold	1515	spectra_filtered/specs_ms.mgf	lib-00021.mgf	0.694667	GNPS-NIH-SMALLMOLECULEPHARMACOLOGICALLYACTIVE	434	0	44.1003	3	0.0198059	449.111	449.131	1	spectra_filtered/specs_ms.mgf1515	1		0	0	UGZLJOKGLBVBHF-IKGPWECESA-N	UGZLJOKGLBVBHF	Phenylpropanoids and polyketides	Flavonoids	Flavonoid glycosides	Flavonols	Flavonols	Shikimates and Phenylpropanoids
CCMSLIB00003140088	Spectral Match to Cyanidin 3-galactoside cation from NIST14	ESI	Q-TOF	Isolated	Data from Pieter Dorrestein;Ajit Jadhav	Data deposited by lfnothias	Cat	449.112	0	1	142506261	N/A	N/A	N/A	N/A	3	Positive	UPDATE-SINGLE-ANNOTATED-BRONZE	Bronze	1516	spectra_filtered/specs_ms.mgf	lib-00036.mgf	0.931304	GNPS-NIST14-MATCHES	2302	0	42.3334	5	0.0190125	449.112	449.131	1	spectra_filtered/specs_ms.mgf1516	1		1	6	N/A	N/A	N/A	N/A	N/A	N/A	N/A	N/A
CCMSLIB00003136634	Spectral Match to Astragalin from NIST14	ESI	Q-TOF	Isolated	Data from Pieter Dorrestein	Data deposited by lfnothias	M+H	449.117	0	1	480104	N/A	N/A	N/A	N/A	3	Positive	UPDATE-SINGLE-ANNOTATED-BRONZE	Bronze	1517	spectra_filtered/specs_ms.mgf	lib-00036.mgf	0.94967	GNPS-NIST14-MATCHES	4056	0	31.393	5	0.0140991	449.117	449.131	1	spectra_filtered/specs_ms.mgf1517	1		32	1328	N/A	N/A	N/A	N/A	N/A	N/A	N/A	N/A
CCMSLIB00003139689	Spectral Match to 1-Palmitoyl-2-hydroxy-sn-glycero-3-phosphoethanolamine from NIST14	ESI	HCD	Isolated	Data from Pieter Dorrestein	Data deposited by lfnothias	M+H	454.293	0	1	53862354	N/A	N/A	N/A	N/A	3	Positive	UPDATE-SINGLE-ANNOTATED-BRONZE	Bronze	1530	spectra_filtered/specs_ms.mgf	lib-00036.mgf	0.523412	GNPS-NIST14-MATCHES	177	0	40.0369	4	0.0181885	454.293	454.311	1	spectra_filtered/specs_ms.mgf1530	1		145	10478	N/A	N/A	N/A	N/A	N/A	N/A	N/A	N/A
CCMSLIB00003138281	Spectral Match to Epigallocatechin gallate from NIST14	ESI	Q-TOF	Isolated	Data from Souard	Data deposited by souardf	M+H	459.099	0	1	989515	N/A	N/A	N/A	N/A	3	Positive	UPDATE-SINGLE-ANNOTATED-BRONZE	Bronze	1551	spectra_filtered/specs_ms.mgf	lib-00036.mgf	0.849739	GNPS-NIST14-MATCHES	783	0	39.8837	7	0.0183105	459.099	459.117	1	spectra_filtered/specs_ms.mgf1551	1		14	268	N/A	N/A	N/A	N/A	N/A	N/A	N/A	N/A
CCMSLIB00004694293	TRIGONELLINE	N/A	ESI-QFT	isolated	MoNA	MoNA:VF-NPL-QEHF003230	[M+H]+	138.055	0	1	N/A	N/A	N/A	InChI=1S/C7H7NO2/c1-8-4-2-3-6(5-8)7(9)10/h2-5H,1H3	N/A	3	positive	UPDATE-SINGLE-ANNOTATED-BRONZE	Bronze	158	spectra_filtered/specs_ms.mgf	lib-00032.mgf	0.773166	MONA	1341	0	0	3	0	138.055	138.055	1	spectra_filtered/specs_ms.mgf158	1		0	0	WWNNZCOKKKDOPX-UHFFFAOYSA-N	WWNNZCOKKKDOPX	N/A	N/A	N/A	N/A	N/A	N/A
CCMSLIB00003135906	Spectral Match to Peonidin 3-galactoside cation from NIST14	ESI	Q-TOF	Isolated	Data from Pieter Dorrestein	Data deposited by dfloros	Cat	463.136	0	1	260256266	N/A	N/A	N/A	N/A	3	Positive	UPDATE-SINGLE-ANNOTATED-BRONZE	Bronze	1583	spectra_filtered/specs_ms.mgf	lib-00036.mgf	0.685076	GNPS-NIST14-MATCHES	267	0	26.8186	3	0.0124207	463.136	463.148	1	spectra_filtered/specs_ms.mgf1583	1		7	245	N/A	N/A	N/A	N/A	N/A	N/A	N/A	N/A
CCMSLIB00003136664	Spectral Match to Isoquercitin from NIST14	ESI	Q-TOF	Isolated	Data from Pieter Dorrestein	Data deposited by lfnothias	M+H	465.111	0	1	21637252	N/A	N/A	N/A	N/A	3	Positive	UPDATE-SINGLE-ANNOTATED-BRONZE	Bronze	1593	spectra_filtered/specs_ms.mgf	lib-00036.mgf	0.919708	GNPS-NIST14-MATCHES	9267	0	33.3317	8	0.0155029	465.111	465.126	1	spectra_filtered/specs_ms.mgf1593	1		36	1338	N/A	N/A	N/A	N/A	N/A	N/A	N/A	N/A
CCMSLIB00003136664	Spectral Match to Isoquercitin from NIST14	ESI	Q-TOF	Isolated	Data from Pieter Dorrestein	Data deposited by lfnothias	M+H	465.111	0	1	21637252	N/A	N/A	N/A	N/A	3	Positive	UPDATE-SINGLE-ANNOTATED-BRONZE	Bronze	1594	spectra_filtered/specs_ms.mgf	lib-00036.mgf	0.94113	GNPS-NIST14-MATCHES	6912	0	34.6439	8	0.0161133	465.111	465.127	1	spectra_filtered/specs_ms.mgf1594	1		36	1338	N/A	N/A	N/A	N/A	N/A	N/A	N/A	N/A
CCMSLIB00000213823	Massbank:FIO00171 Kaempferol-7-neohesperidoside	ESI	LC-ESI-QTOF	Isolated	Putative Massbank Match	Massbank	[M+H]+	595.166	0	1	17353-03-6	N/A	O([C@H]5C)[C@H]([C@@H]([C@@H]([C@H]5O)O)O)O[C@H]([C@H]4O)[C@@H](O[C@@H]([C@H]4O)CO)Oc(c3)cc(O1)c(c3O)C(C(=C(c(c2)ccc(O)c2)1)O)=O	1S/C27H30O15/c1-9-17(31)20(34)23(37)26(38-9)42-25-21(35)18(32)15(8-28)41-27(25)39-12-6-13(30)16-14(7-12)40-24(22(36)19(16)33)10-2-4-11(29)5-3-10/h2-7,9,15,17-18,20-21,23,25-32,34-37H,8H2,1H3/t9-,15+,17-,18+,20+,21-,23+,25+,26-,27+/m0/s1	N/A	3	Positive	UPDATE-SINGLE-ANNOTATED-BRONZE	Bronze	1961	spectra_filtered/specs_ms.mgf	lib-00004.mgf	0.772483	MASSBANK	742	0	15.3827	3	0.00915527	595.166	595.175	1	spectra_filtered/specs_ms.mgf1961	1		1	5	ZEJXENDZTYVXDP-CSJHBIPPSA-N	ZEJXENDZTYVXDP	Phenylpropanoids and polyketides	Flavonoids	Flavonoid glycosides	Flavonols	Flavonols	Shikimates and Phenylpropanoids
CCMSLIB00000213823	Massbank:FIO00171 Kaempferol-7-neohesperidoside	ESI	LC-ESI-QTOF	Isolated	Putative Massbank Match	Massbank	[M+H]+	595.166	0	1	17353-03-6	N/A	O([C@H]5C)[C@H]([C@@H]([C@@H]([C@H]5O)O)O)O[C@H]([C@H]4O)[C@@H](O[C@@H]([C@H]4O)CO)Oc(c3)cc(O1)c(c3O)C(C(=C(c(c2)ccc(O)c2)1)O)=O	1S/C27H30O15/c1-9-17(31)20(34)23(37)26(38-9)42-25-21(35)18(32)15(8-28)41-27(25)39-12-6-13(30)16-14(7-12)40-24(22(36)19(16)33)10-2-4-11(29)5-3-10/h2-7,9,15,17-18,20-21,23,25-32,34-37H,8H2,1H3/t9-,15+,17-,18+,20+,21-,23+,25+,26-,27+/m0/s1	N/A	3	Positive	UPDATE-SINGLE-ANNOTATED-BRONZE	Bronze	1962	spectra_filtered/specs_ms.mgf	lib-00004.mgf	0.720602	MASSBANK	951	0	17.7414	3	0.0105591	595.166	595.177	1	spectra_filtered/specs_ms.mgf1962	1		1	5	ZEJXENDZTYVXDP-CSJHBIPPSA-N	ZEJXENDZTYVXDP	Phenylpropanoids and polyketides	Flavonoids	Flavonoid glycosides	Flavonols	Flavonols	Shikimates and Phenylpropanoids
CCMSLIB00000222734	Massbank:PR040086 cyanidin-3-O-rutinoside|Keracyanin|(2S,3R,4S,5S,6R)-2-[2-(3,4-dihydroxyphenyl)-5,7-dihydroxychromenylium-3-yl]oxy-6-[[(2R,3R,4R,5R,6S)-3,4,5-trihydroxy-6-methyloxan-2-yl]oxymethyl]oxane-3,4,5-triol	ESI	LC-ESI-QTOF	Isolated	Putative Massbank Match	Massbank	[M+H]	595.2	0	1	18719-76-1	N/A	c(c(c([o+1]2)c(O[C@H](O4)[C@@H]([C@H]([C@@H]([C@H]4CO[C@@H]([C@@H]5O)O[C@H]([C@@H]([C@H]5O)O)C)O)O)O)cc(c(O)3)c(cc(O)c3)2)1)c(O)c(O)cc1	1S/C27H30O15/c1-9-19(32)21(34)23(36)26(39-9)38-8-18-20(33)22(35)24(37)27(42-18)41-17-7-12-14(30)5-11(28)6-16(12)40-25(17)10-2-3-13(29)15(31)4-10/h2-7,9,18-24,26-27,32-37H,8H2,1H3,(H3-,28,29,30,31)/p+1/t9-,18+,19-,20+,21+,22-,23+,24+,26+,27+/m0/s1	N/A	3	Positive	UPDATE-SINGLE-ANNOTATED-BRONZE	Bronze	1965	spectra_filtered/specs_ms.mgf	lib-00004.mgf	0.791076	MASSBANK	3181	0	2.87128	3	0.00170898	595.2	595.198	1	spectra_filtered/specs_ms.mgf1965	1		0	0	USNPULRDBDVJAO-FXCAAIILSA-O	USNPULRDBDVJAO	Phenylpropanoids and polyketides	Flavonoids	Flavonoid glycosides	N/A	N/A	N/A
CCMSLIB00000848252	NCGC00385120-01!7-[(2S,3R,4S,5S,6R)-4,5-dihydroxy-6-(hydroxymethyl)-3-[(2S,3R,4R,5R,6S)-3,4,5-trihydroxy-6-methyloxan-2-yl]oxyoxan-2-yl]oxy-5-hydroxy-2-(4-hydroxy-3-methoxyphenyl)chromen-4-one	LC-ESI	Maxis II HD Q-TOF Bruker	isolated	Jadhav/Dorrestein	lfnothias	M+H	609.181	608.174	1	n/a	n/a	COC1=C(O)C=CC(=C1)C2=CC(=O)C3=C(O)C=C(O[C@@H]4O[C@H](CO)[C@@H](O)[C@H](O)[C@H]4O[C@@H]5O[C@@H](C)[C@H](O)[C@@H](O)[C@H]5O)C=C3O2	InChI=1S/C28H32O15/c1-10-21(33)23(35)25(37)27(39-10)43-26-24(36)22(34)19(9-29)42-28(26)40-12-6-14(31)20-15(32)8-16(41-18(20)7-12)11-3-4-13(30)17(5-11)38-2/h3-8,10,19,21-31,33-37H,9H2,1-2H3/t10-,19+,21-,22+,23+,24-,25+,26+,27-,28+/m0/s1	N/A	1	positive	UPDATE-SINGLE-ANNOTATED-GOLD	Gold	2016	spectra_filtered/specs_ms.mgf	lib-00002.mgf	0.749841	GNPS-NIH-NATURALPRODUCTSLIBRARY_ROUND2_POSITIVE	445	0	2.00384	3	0.0012207	609.181	609.18	1	spectra_filtered/specs_ms.mgf2016	1		7	27	LGOQXEQWOCSLEC-CYZBKYQRSA-N	LGOQXEQWOCSLEC	Phenylpropanoids and polyketides	Flavonoids	Flavonoid glycosides	Flavones	Flavones	Shikimates and Phenylpropanoids
CCMSLIB00000214342	Massbank:FIO00485 Hesperidin	ESI	LC-ESI-QTOF	Isolated	Putative Massbank Match	Massbank	[M+H]+	611.198	0	1	520-26-3	N/A	c(O)(c3)c(C(=O)2)c(cc3OC(O4)C(O)C(O)C(O)C(COC(O5)C(O)C(C(C5C)O)O)4)OC(C2)c(c1)ccc(c1O)OC	1S/C28H34O15/c1-10-21(32)23(34)25(36)27(40-10)39-9-19-22(33)24(35)26(37)28(43-19)41-12-6-14(30)20-15(31)8-17(42-18(20)7-12)11-3-4-16(38-2)13(29)5-11/h3-7,10,17,19,21-30,32-37H,8-9H2,1-2H3/t10-,17-,19+,21-,22+,23+,24-,25+,26+,27+,28+/m0/s1	N/A	3	Positive	UPDATE-SINGLE-ANNOTATED-BRONZE	Bronze	2033	spectra_filtered/specs_ms.mgf	lib-00004.mgf	0.873407	MASSBANK	28325	0	20.0722	10	0.0122681	611.198	611.186	1	spectra_filtered/specs_ms.mgf2033	1		3	26	QUQPHWDTPGMPEX-UHFFFAOYSA-N	QUQPHWDTPGMPEX	Phenylpropanoids and polyketides	Flavonoids	Flavonoid glycosides	Flavanones	Flavanones	Shikimates and Phenylpropanoids
CCMSLIB00005467682	Coumarin	LC-ESI	qTof	Isolated	Claudia Maier	Armando Alcazar	M+H	147.04	0	1						3	Positive	UPDATE-SINGLE-ANNOTATED-BRONZE	Bronze	211	spectra_filtered/specs_ms.mgf	lib-00014.mgf	0.541877	GNPS-LIBRARY	1319	0	27.2923	3	0.00401306	147.04	147.044	1	spectra_filtered/specs_ms.mgf211	1		0	0	N/A	N/A	N/A	N/A	N/A	N/A	N/A	N/A
CCMSLIB00005467682	Coumarin	LC-ESI	qTof	Isolated	Claudia Maier	Armando Alcazar	M+H	147.04	0	1						3	Positive	UPDATE-SINGLE-ANNOTATED-BRONZE	Bronze	213	spectra_filtered/specs_ms.mgf	lib-00014.mgf	0.809897	GNPS-LIBRARY	92	0	34.0376	3	0.00500488	147.04	147.045	1	spectra_filtered/specs_ms.mgf213	1		0	0	N/A	N/A	N/A	N/A	N/A	N/A	N/A	N/A
CCMSLIB00003140087	Spectral Match to L-Glutamine from NIST14	ESI	QqQ	Isolated	Data from Sambles	Data deposited by rsilva	M+H	147.07	0	1	56859	N/A	N/A	N/A	N/A	3	Positive	UPDATE-SINGLE-ANNOTATED-BRONZE	Bronze	215	spectra_filtered/specs_ms.mgf	lib-00036.mgf	0.788592	GNPS-NIST14-MATCHES	1058	0	43.472	3	0.00639343	147.07	147.076	1	spectra_filtered/specs_ms.mgf215	1		1	31	N/A	N/A	N/A	N/A	N/A	N/A	N/A	N/A
CCMSLIB00000221804	Massbank:PB000463 Glutamic acid|2-aminopentanedioic acid	ESI	LC-ESI-QTOF	Isolated	Putative Massbank Match	Massbank	[M+H]+	148.061	0	1	N/A	N/A	C(CC(=O)O)C(C(=O)O)N	1S/C5H9NO4/c6-3(5(9)10)1-2-4(7)8/h3H,1-2,6H2,(H,7,8)(H,9,10)	N/A	3	Positive	UPDATE-SINGLE-ANNOTATED-BRONZE	Bronze	218	spectra_filtered/specs_ms.mgf	lib-00004.mgf	0.923409	MASSBANK	674	0	3.4009	3	0.00050354	148.061	148.061	1	spectra_filtered/specs_ms.mgf218	1		0	0	WHUUTDBJXJRKMK-UHFFFAOYSA-N	WHUUTDBJXJRKMK	Organic acids and derivatives	Carboxylic acids and derivatives	Amino acids, peptides, and analogues	Aminoacids	Aminoacids	Amino acids and Peptides
CCMSLIB00004706263	[(2R,3S,4S,5R,6S)-6-[(2S,3R,4R,5R,6S)-2-[5,7-dihydroxy-2-(4-hydroxyphenyl)-4-oxochromen-3-yl]oxy-4,5-dihydroxy-6-methyloxan-3-yl]oxy-3,4,5-trihydroxyoxan-2-yl]methyl (E)-3-(4-hydroxyphenyl)prop-2-enoate	N/A	ESI-QFT	isolated	MoNA	MoNA:VF-NPL-QEHF015200	[M+H]+	741.203	0	1	N/A	N/A	N/A	InChI=1S/C36H36O17/c1-15-26(42)30(46)34(53-35-31(47)29(45)27(43)23(51-35)14-48-24(41)11-4-16-2-7-18(37)8-3-16)36(49-15)52-33-28(44)25-21(40)12-20(39)13-22(25)50-32(33)17-5-9-19(38)10-6-17/h2-13,15,23,26-27,29-31,34-40,42-43,45-47H,14H2,1H3/b11-4+/t15-,23+,26-,27+,29-,30+,31+,34+,35-,36-/m0/s1	N/A	3	positive	UPDATE-SINGLE-ANNOTATED-BRONZE	Bronze	2292	spectra_filtered/specs_ms.mgf	lib-00032.mgf	0.713763	MONA	786	0	26.6801	4	0.0197754	741.203	741.223	1	spectra_filtered/specs_ms.mgf2292	1		0	0	KAJMZANRKFVVKV-RGXKZFLBSA-N	KAJMZANRKFVVKV	Phenylpropanoids and polyketides	Flavonoids	Flavonoid glycosides	N/A	N/A	N/A
CCMSLIB00000847993	NCGC00168998-02!3-[6-[[(2R,3R,4R,5S,6S)-3,5-dihydroxy-6-methyl-4-[(2S,3R,4R,5R,6S)-3,4,5-trihydroxy-6-methyloxan-2-yl]oxyoxan-2-yl]oxymethyl]-3,4,5-trihydroxyoxan-2-yl]oxy-5-hydroxy-2-(4-hydroxyphenyl)-7-methoxychromen-4-one	LC-ESI	Maxis II HD Q-TOF Bruker	isolated	Jadhav/Dorrestein	lfnothias	M+H	755.239	754.232	1	n/a	n/a	COC1=CC2=C(C(=O)C(OC3OC(CO[C@@H]4O[C@@H](C)[C@H](O)[C@@H](O[C@@H]5O[C@@H](C)[C@H](O)[C@@H](O)[C@H]5O)[C@H]4O)C(O)C(O)C3O)=C(O2)C6=CC=C(O)C=C6)C(O)=C1	InChI=1S/C34H42O19/c1-11-20(37)24(41)26(43)33(49-11)52-30-21(38)12(2)48-32(28(30)45)47-10-18-22(39)25(42)27(44)34(51-18)53-31-23(40)19-16(36)8-15(46-3)9-17(19)50-29(31)13-4-6-14(35)7-5-13/h4-9,11-12,18,20-22,24-28,30,32-39,41-45H,10H2,1-3H3/t11-,12-,18?,20-,21-,22?,24+,25?,26+,27?,28+,30+,32+,33-,34?/m0/s1	N/A	1	positive	UPDATE-SINGLE-ANNOTATED-GOLD	Gold	2299	spectra_filtered/specs_ms.mgf	lib-00002.mgf	0.547012	GNPS-NIH-NATURALPRODUCTSLIBRARY_ROUND2_POSITIVE	349	0	2.66692	4	0.00201416	755.239	755.237	1	spectra_filtered/specs_ms.mgf2299	1		0	0	MQMTVWHXCSRCER-OHWKTECQSA-N	MQMTVWHXCSRCER	Phenylpropanoids and polyketides	Flavonoids	Flavonoid glycosides	Flavonols	Flavonols	Shikimates and Phenylpropanoids
CCMSLIB00000221719	Massbank:PB000422 Histidine|2-amino-3-(3H-imidazol-4-yl)propanoic acid	ESI	LC-ESI-QTOF	Isolated	Putative Massbank Match	Massbank	[M+H]+	156.077	0	1	N/A	N/A	C1=C(NC=N1)CC(C(=O)O)N	1S/C6H9N3O2/c7-5(6(10)11)1-4-2-8-3-9-4/h2-3,5H,1,7H2,(H,8,9)(H,10,11)	N/A	3	Positive	UPDATE-SINGLE-ANNOTATED-BRONZE	Bronze	255	spectra_filtered/specs_ms.mgf	lib-00004.mgf	0.882295	MASSBANK	522	0	3.81282	3	0.000595093	156.077	156.076	1	spectra_filtered/specs_ms.mgf255	1		0	0	HNDVDQJCIGZPNO-UHFFFAOYSA-N	HNDVDQJCIGZPNO	Organic acids and derivatives	Carboxylic acids and derivatives	Amino acids, peptides, and analogues	Aminoacids	Aminoacids	Amino acids and Peptides
CCMSLIB00005464130	N-ACETYLPROLINE	ESI	Orbitrap	Commercial	Dorrestein	Kelly Weldon	M+H	158.081	157.074	1	68-95-1	N/A	CC(=O)N1CCCC1C(=O)O	"InChI=1S/C7H11NO3/c1-5(9)8-4-2-3-6(8)7(10)11/h6H,2-4H2,1H3,(H,10,11)"	N/A	1	Positive	UPDATE-SINGLE-ANNOTATED-GOLD	Gold	261	spectra_filtered/specs_ms.mgf	lib-00016.mgf	0.611642	GNPS-MSMLS	248	0	67.085	3	0.0106049	158.081	158.092	1	spectra_filtered/specs_ms.mgf261	1		0	0	GNMSLDIYJOSUSW-UHFFFAOYSA-N	GNMSLDIYJOSUSW	Organic acids and derivatives	Carboxylic acids and derivatives	Amino acids, peptides, and analogues	Aminoacids|Dipeptides	Aminoacids|Dipeptides	Amino acids and Peptides
CCMSLIB00003139460	Spectral Match to Chicoric acid from NIST14	ESI	QqQ	Isolated	Data from Pieter Dorrestein	Data deposited by lfnothias	M+H-C13H12O9	163.039	0	1	6537800	N/A	N/A	N/A	N/A	3	Positive	UPDATE-SINGLE-ANNOTATED-BRONZE	Bronze	277	spectra_filtered/specs_ms.mgf	lib-00036.mgf	0.88099	GNPS-NIST14-MATCHES	792	0	1.8718	4	0.000305176	163.039	163.039	1	spectra_filtered/specs_ms.mgf277	1		3	40	N/A	N/A	N/A	N/A	N/A	N/A	N/A	N/A
CCMSLIB00003139305	Spectral Match to Rosmarinic acid from NIST14	ESI	QqQ	Isolated	Data from Jairam KP Vanamala, PhD	Data deposited by mjmeehan	M+H-C9H10O5	163.039	0	1	20283925	N/A	N/A	N/A	N/A	3	Positive	UPDATE-SINGLE-ANNOTATED-BRONZE	Bronze	278	spectra_filtered/specs_ms.mgf	lib-00036.mgf	0.856349	GNPS-NIST14-MATCHES	909	0	1.21667	4	0.000198364	163.039	163.039	1	spectra_filtered/specs_ms.mgf278	1		7	262	N/A	N/A	N/A	N/A	N/A	N/A	N/A	N/A
CCMSLIB00003140121	Spectral Match to L-Tyrosine from NIST14	ESI	HCD	Isolated	Data from Pieter C Dorrestein	Data deposited by negarg	M+H-NH3	165.055	0	1	60184	N/A	N/A	N/A	N/A	3	Positive	UPDATE-SINGLE-ANNOTATED-BRONZE	Bronze	292	spectra_filtered/specs_ms.mgf	lib-00036.mgf	0.880557	GNPS-NIST14-MATCHES	2228	0	4.80723	4	0.000793457	165.055	165.054	1	spectra_filtered/specs_ms.mgf292	1		81	6341	N/A	N/A	N/A	N/A	N/A	N/A	N/A	N/A
CCMSLIB00000221690	Massbank:PB000408 Phenylalanine|2-amino-3-phenylpropanoic acid	ESI	LC-ESI-QTOF	Isolated	Putative Massbank Match	Massbank	[M+H]+	166.087	0	1	N/A	N/A	C1=CC=C(C=C1)CC(C(=O)O)N	1S/C9H11NO2/c10-8(9(11)12)6-7-4-2-1-3-5-7/h1-5,8H,6,10H2,(H,11,12)	N/A	3	Positive	UPDATE-SINGLE-ANNOTATED-BRONZE	Bronze	299	spectra_filtered/specs_ms.mgf	lib-00004.mgf	0.962136	MASSBANK	1946	0	4.86923	5	0.000808716	166.087	166.086	1	spectra_filtered/specs_ms.mgf299	1		1	12	COLNVLDHVKWLRT-UHFFFAOYSA-N	COLNVLDHVKWLRT	Organic acids and derivatives	Carboxylic acids and derivatives	Amino acids, peptides, and analogues	Aminoacids	Aminoacids	Amino acids and Peptides
CCMSLIB00003135807	Spectral Match to Gallic acid from NIST14	ESI	Q-TOF	Isolated	Data from Wolfender/Litaudon	Data deposited by pmallard	M+H	171.029	0	1	149917	N/A	N/A	N/A	N/A	3	Positive	UPDATE-SINGLE-ANNOTATED-BRONZE	Bronze	312	spectra_filtered/specs_ms.mgf	lib-00036.mgf	0.666809	GNPS-NIST14-MATCHES	668	0	3.5687	3	0.000610352	171.029	171.028	1	spectra_filtered/specs_ms.mgf312	1		0	0	N/A	N/A	N/A	N/A	N/A	N/A	N/A	N/A
CCMSLIB00003135807	Spectral Match to Gallic acid from NIST14	ESI	Q-TOF	Isolated	Data from Wolfender/Litaudon	Data deposited by pmallard	M+H	171.029	0	1	149917	N/A	N/A	N/A	N/A	3	Positive	UPDATE-SINGLE-ANNOTATED-BRONZE	Bronze	313	spectra_filtered/specs_ms.mgf	lib-00036.mgf	0.740415	GNPS-NIST14-MATCHES	143	0	1.78435	4	0.000305176	171.029	171.029	1	spectra_filtered/specs_ms.mgf313	1		0	0	N/A	N/A	N/A	N/A	N/A	N/A	N/A	N/A
CCMSLIB00000205804	Massbank:CE000269 Arginine	ESI	LC-ESI-ITFT	Isolated	Putative Massbank Match	Massbank	[M+H]+	175.119	0	1	N/A	N/A	C(CC(C(=O)O)N)CN=C(N)N	1S/C6H14N4O2/c7-4(5(11)12)2-1-3-10-6(8)9/h4H,1-3,7H2,(H,11,12)(H4,8,9,10)	N/A	3	Positive	UPDATE-SINGLE-ANNOTATED-BRONZE	Bronze	330	spectra_filtered/specs_ms.mgf	lib-00004.mgf	0.927992	MASSBANK	3178	0	4.00816	5	0.000701904	175.119	175.118	1	spectra_filtered/specs_ms.mgf330	1		0	0	ODKSFYDXXFIFQN-UHFFFAOYSA-N	ODKSFYDXXFIFQN	Organic acids and derivatives	Carboxylic acids and derivatives	Amino acids, peptides, and analogues	Aminoacids	Aminoacids	Amino acids and Peptides
CCMSLIB00005464417	FERULATE	ESI	Orbitrap	Commercial	Dorrestein	Kelly Weldon	M-H2O+H	177.054	194.058	1	1135-24-6	N/A	COC1=C(O)C=CC(\C=C\C(O)=O)=C1	"InChI=1S/C10H10O4/c1-14-9-6-7(2-4-8(9)11)3-5-10(12)13/h2-6,11H,1H3,(H,12,13)/b5-3+"	N/A	1	Positive	UPDATE-SINGLE-ANNOTATED-GOLD	Gold	340	spectra_filtered/specs_ms.mgf	lib-00016.mgf	0.701781	GNPS-MSMLS	260	0	0	3	0	177.054	177.054	1	spectra_filtered/specs_ms.mgf340	1		0	0	KSEBMYQBYZTDHS-HWKANZROSA-N	KSEBMYQBYZTDHS	Phenylpropanoids and polyketides	Cinnamic acids and derivatives	Hydroxycinnamic acids and derivatives	Cinnamic acids and derivatives	Cinnamic acids and derivatives	Shikimates and Phenylpropanoids
CCMSLIB00005464417	FERULATE	ESI	Orbitrap	Commercial	Dorrestein	Kelly Weldon	M-H2O+H	177.054	194.058	1	1135-24-6	N/A	COC1=C(O)C=CC(\C=C\C(O)=O)=C1	"InChI=1S/C10H10O4/c1-14-9-6-7(2-4-8(9)11)3-5-10(12)13/h2-6,11H,1H3,(H,12,13)/b5-3+"	N/A	1	Positive	UPDATE-SINGLE-ANNOTATED-GOLD	Gold	342	spectra_filtered/specs_ms.mgf	lib-00016.mgf	0.673655	GNPS-MSMLS	300	0	2.24072	3	0.000396729	177.054	177.054	1	spectra_filtered/specs_ms.mgf342	1		0	0	KSEBMYQBYZTDHS-HWKANZROSA-N	KSEBMYQBYZTDHS	Phenylpropanoids and polyketides	Cinnamic acids and derivatives	Hydroxycinnamic acids and derivatives	Cinnamic acids and derivatives	Cinnamic acids and derivatives	Shikimates and Phenylpropanoids
CCMSLIB00003138949	Spectral Match to 3-Hydroxy-4-methoxycinnamic acid from NIST14	ESI	QqQ	Isolated	Data from PC Dorrestein	Data deposited by daniel	M+H-H2O	177.054	0	1	537735	N/A	N/A	N/A	N/A	3	Positive	UPDATE-SINGLE-ANNOTATED-BRONZE	Bronze	344	spectra_filtered/specs_ms.mgf	lib-00036.mgf	0.828162	GNPS-NIST14-MATCHES	320	0	2.24072	4	0.000396729	177.054	177.054	1	spectra_filtered/specs_ms.mgf344	1		28	1365	N/A	N/A	N/A	N/A	N/A	N/A	N/A	N/A
CCMSLIB00003139462	Spectral Match to Diethyl phthalate from NIST14	ESI	QqQ	Isolated	Data from Wolfender/Litaudon	Data deposited by pmallard	M+H-C2H6O	177.055	0	1	84662	N/A	N/A	N/A	N/A	3	Positive	UPDATE-SINGLE-ANNOTATED-BRONZE	Bronze	345	spectra_filtered/specs_ms.mgf	lib-00036.mgf	0.883497	GNPS-NIST14-MATCHES	720	0	3.36106	3	0.000595093	177.055	177.054	1	spectra_filtered/specs_ms.mgf345	1		58	3969	N/A	N/A	N/A	N/A	N/A	N/A	N/A	N/A
CCMSLIB00003135556	Spectral Match to Coniferyl aldehyde from NIST14	ESI	Q-TOF	Isolated	Data from Suryasarathi Dasgupta	Data deposited by fevargas	M+H	179.071	0	1	458366	N/A	N/A	N/A	N/A	3	Positive	UPDATE-SINGLE-ANNOTATED-BRONZE	Bronze	355	spectra_filtered/specs_ms.mgf	lib-00036.mgf	0.667156	GNPS-NIST14-MATCHES	194	0	7.24292	4	0.001297	179.071	179.07	1	spectra_filtered/specs_ms.mgf355	1		9	567	N/A	N/A	N/A	N/A	N/A	N/A	N/A	N/A
CCMSLIB00003139680	Spectral Match to L-Tyrosine from NIST14	ESI	Q-TOF	Isolated	Data from P.Dorrestein	Data deposited by amelnik	M+H	182.081	0	1	60184	N/A	N/A	N/A	N/A	3	Positive	UPDATE-SINGLE-ANNOTATED-BRONZE	Bronze	378	spectra_filtered/specs_ms.mgf	lib-00036.mgf	0.863256	GNPS-NIST14-MATCHES	2436	0	1.17323	6	0.000213623	182.081	182.081	1	spectra_filtered/specs_ms.mgf378	1		81	6341	N/A	N/A	N/A	N/A	N/A	N/A	N/A	N/A
CCMSLIB00000221550	ReSpect:PT110240 O-Phosphocholine|Phosphocholine chloride calcium salt tetrahydrate|Choline phosphate|Phosphorylcholine|N-Trimethyl-2-aminoethylphosphonate|trimethyl-(2-phosphonooxyethyl)azanium	ESI	LC-Q-TOF/MS	Isolated	Putative ReSpect Match	ReSpect	[M+H]	184.074	0	1	107-73-3	N/A	C[N+](C)(C)CCOP(=O)(O)O	1/C5H14NO4P/c1-6(2,3)4-5-10-11(7,8)9/h4-5H2,1-3H3,(H-,7,8,9)/p+1/fC5H15NO4P/h7-8H/q+1	N/A	3	Positive	UPDATE-SINGLE-ANNOTATED-BRONZE	Bronze	388	spectra_filtered/specs_ms.mgf	lib-00010.mgf	0.897189	RESPECT	268	0	17.4079	3	0.00320435	184.074	184.071	1	spectra_filtered/specs_ms.mgf388	1		0	0	YHHSONZFOIEMCP-UHFFFAOYSA-O	YHHSONZFOIEMCP	Organic nitrogen compounds	Organonitrogen compounds	Quaternary ammonium salts	N/A	N/A	N/A
CCMSLIB00003138745	Spectral Match to DL-Indole-3-lactic acid from NIST14	ESI	Q-TOF	Isolated	Data from Karin	Data deposited by aaksenov	M+H-H2O	188.07	0	1	832973	N/A	N/A	N/A	N/A	3	Positive	UPDATE-SINGLE-ANNOTATED-BRONZE	Bronze	402	spectra_filtered/specs_ms.mgf	lib-00036.mgf	0.889255	GNPS-NIST14-MATCHES	7272	0	5.84162	5	0.00109863	188.07	188.071	1	spectra_filtered/specs_ms.mgf402	1		95	8144	N/A	N/A	N/A	N/A	N/A	N/A	N/A	N/A
CCMSLIB00003135762	Spectral Match to Syringic acid from NIST14	ESI	HCD	Isolated	Data from Pieter Dorrestein	Data deposited by mwang87	M+H	199.058	0	1	530574	N/A	N/A	N/A	N/A	3	Positive	UPDATE-SINGLE-ANNOTATED-BRONZE	Bronze	471	spectra_filtered/specs_ms.mgf	lib-00036.mgf	0.548304	GNPS-NIST14-MATCHES	414	0	6.51567	3	0.001297	199.058	199.057	1	spectra_filtered/specs_ms.mgf471	1		26	1698	N/A	N/A	N/A	N/A	N/A	N/A	N/A	N/A
CCMSLIB00003138633	Spectral Match to N-Acetyl-D-glucosamine from NIST14	ESI	qTof	Isolated	Data from Pieter Dorrestein	Data deposited by daniel	M+H-H2O	204.084	0	1	7512176	N/A	CC(=O)NC1C(C(C(OC1O)CO)O)O	N/A	N/A	3	Positive	UPDATE-SINGLE-ANNOTATED-BRONZE	Bronze	488	spectra_filtered/specs_ms.mgf	lib-00036.mgf	0.862963	GNPS-NIST14-MATCHES	401	0	10.3179	4	0.00210571	204.084	204.086	1	spectra_filtered/specs_ms.mgf488	1		25	1297	OVRNDRQMDRJTHS-UHFFFAOYSA-N	OVRNDRQMDRJTHS	Organic oxygen compounds	Organooxygen compounds	Carbohydrates and carbohydrate conjugates	Aminosugars	Aminosugars	Carbohydrates
CCMSLIB00003137628	Spectral Match to L-Tryptophan from NIST14	ESI	Q-TOF	Isolated	Data from Jeffrey McLean, Xuesong He	Data deposited by aedlund	M+H	205.097	0	1	73223	N/A	N/A	N/A	N/A	3	Positive	UPDATE-SINGLE-ANNOTATED-BRONZE	Bronze	494	spectra_filtered/specs_ms.mgf	lib-00036.mgf	0.845024	GNPS-NIST14-MATCHES	2245	0	2.90152	5	0.000595093	205.097	205.098	1	spectra_filtered/specs_ms.mgf494	1		216	30170	N/A	N/A	N/A	N/A	N/A	N/A	N/A	N/A
CCMSLIB00003139265	Spectral Match to (-)-Isolongifolol from NIST14	ESI	IT/ion trap	Isolated	Data from Dr. Katherine R. Duncan	Data deposited by kduncan	M+H-H2O	205.195	0	1	1139179	N/A	N/A	N/A	N/A	3	Positive	UPDATE-SINGLE-ANNOTATED-BRONZE	Bronze	496	spectra_filtered/specs_ms.mgf	lib-00036.mgf	0.848512	GNPS-NIST14-MATCHES	698	0	1.48725	6	0.000305176	205.195	205.195	1	spectra_filtered/specs_ms.mgf496	1		12	192	N/A	N/A	N/A	N/A	N/A	N/A	N/A	N/A
CCMSLIB00003134593	Spectral Match to Farnesol from NIST14	ESI	IT/ion trap	Isolated	Data from Wiemann	Data deposited by pwiemann	M+H-H2O	205.195	0	1	4602840	N/A	N/A	N/A	N/A	3	Positive	UPDATE-SINGLE-ANNOTATED-BRONZE	Bronze	498	spectra_filtered/specs_ms.mgf	lib-00036.mgf	0.703072	GNPS-NIST14-MATCHES	258	0	1.41289	5	0.000289917	205.195	205.195	1	spectra_filtered/specs_ms.mgf498	1		4	32	N/A	N/A	N/A	N/A	N/A	N/A	N/A	N/A
CCMSLIB00003137028	Spectral Match to Pantothenic acid from NIST14	ESI	Q-TOF	Isolated	Data from Joshua Wollam	Data deposited by fevargas	M+H	220.118	0	1	599542	N/A	N/A	N/A	N/A	3	Positive	UPDATE-SINGLE-ANNOTATED-BRONZE	Bronze	582	spectra_filtered/specs_ms.mgf	lib-00036.mgf	0.815799	GNPS-NIST14-MATCHES	671	0	1.80234	7	0.000396729	220.118	220.118	1	spectra_filtered/specs_ms.mgf582	1		46	4184	N/A	N/A	N/A	N/A	N/A	N/A	N/A	N/A
CCMSLIB00000854070	NCGC00385600-01_C13H22O3_2-Cyclohexen-1-one, 4-hydroxy-4-(3-hydroxybutyl)-3,5,5-trimethyl-	LC-ESI	Maxis II HD Q-TOF Bruker	isolated	Jadhav/Dorrestein	lfnothias	M+H	227.164	226.157	1	n/a	n/a	CC(O)CCC1(O)\C(=C/C(=O)CC1(C)C)C	InChI=1S/C13H22O3/c1-9-7-11(15)8-12(3,4)13(9,16)6-5-10(2)14/h7,10,14,16H,5-6,8H2,1-4H3	N/A	1	positive	UPDATE-SINGLE-ANNOTATED-GOLD	Gold	640	spectra_filtered/specs_ms.mgf	lib-00002.mgf	0.52509	GNPS-NIH-NATURALPRODUCTSLIBRARY_ROUND2_POSITIVE	369	0	33.4511	4	0.00759888	227.164	227.172	1	spectra_filtered/specs_ms.mgf640	1		3	61	CWOFGGNDZOPNFG-UHFFFAOYSA-N	CWOFGGNDZOPNFG	Lipids and lipid-like molecules	Prenol lipids	Sesquiterpenoids	Apocarotenoids(ﾎｵ-)	Apocarotenoids(ﾎｵ-)	Terpenoids
CCMSLIB00003139580	Spectral Match to Val-Leu from NIST14	ESI	QqQ	Isolated	Data from Joshua Wollam	Data deposited by fevargas	M+H	231.17	0	1	3989977	N/A	N/A	N/A	N/A	3	Positive	UPDATE-SINGLE-ANNOTATED-BRONZE	Bronze	657	spectra_filtered/specs_ms.mgf	lib-00036.mgf	0.87748	GNPS-NIST14-MATCHES	246	0	2.57426	4	0.000595093	231.17	231.171	1	spectra_filtered/specs_ms.mgf657	1		37	952	N/A	N/A	N/A	N/A	N/A	N/A	N/A	N/A
CCMSLIB00003140084	Spectral Match to Thr-Leu from NIST14	ESI	Q-TOF	Isolated	Data from Julia Gauglitz	Data deposited by fevargas	M+H	233.149	0	1	50299122	N/A	N/A	N/A	N/A	3	Positive	UPDATE-SINGLE-ANNOTATED-BRONZE	Bronze	663	spectra_filtered/specs_ms.mgf	lib-00036.mgf	0.554228	GNPS-NIST14-MATCHES	220	0	3.40322	3	0.000793457	233.149	233.15	1	spectra_filtered/specs_ms.mgf663	1		30	2489	N/A	N/A	N/A	N/A	N/A	N/A	N/A	N/A
CCMSLIB00005719962	Olivetonide	LC-ESI	Orbitrap	Isolated	Jean-Luc WOLFENDER Pierre-Marie ALLARD	Damien OLIVIER	[M+H]	249.113	248.105	1	N/A	N/A	O=c1oc(CCCCC)cc2c1c(cc(c2)O)O	"InChI=1S/C14H16O4/c1-2-3-4-5-11-7-9-6-10(15)8-12(16)13(9)14(17)18-11/h6-8,15-16H,2-5H2,1H3"	N/A	3	Positive	UPDATE-SINGLE-ANNOTATED-BRONZE	Bronze	748	spectra_filtered/specs_ms.mgf	lib-00035.mgf	0.554964	LDB_POSITIVE	2695	0	2.02133	5	0.00050354	249.113	249.113	1	spectra_filtered/specs_ms.mgf748	1		2	13	FIMFRMRZGBUYMV-UHFFFAOYSA-N	FIMFRMRZGBUYMV	N/A	N/A	N/A	Isocoumarins	Isocoumarins	Shikimates and Phenylpropanoids
CCMSLIB00005719962	Olivetonide	LC-ESI	Orbitrap	Isolated	Jean-Luc WOLFENDER Pierre-Marie ALLARD	Damien OLIVIER	[M+H]	249.113	248.105	1	N/A	N/A	O=c1oc(CCCCC)cc2c1c(cc(c2)O)O	"InChI=1S/C14H16O4/c1-2-3-4-5-11-7-9-6-10(15)8-12(16)13(9)14(17)18-11/h6-8,15-16H,2-5H2,1H3"	N/A	3	Positive	UPDATE-SINGLE-ANNOTATED-BRONZE	Bronze	754	spectra_filtered/specs_ms.mgf	lib-00035.mgf	0.523742	LDB_POSITIVE	169	0	48.1444	3	0.0119934	249.113	249.125	1	spectra_filtered/specs_ms.mgf754	1		2	13	FIMFRMRZGBUYMV-UHFFFAOYSA-N	FIMFRMRZGBUYMV	N/A	N/A	N/A	Isocoumarins	Isocoumarins	Shikimates and Phenylpropanoids
CCMSLIB00003138137	Spectral Match to Ser-Phe from NIST14	ESI	Q-TOF	Isolated	Data from Gabriel Haddad	Data deposited by mjmeehan	M+H	253.118	0	1	N/A	N/A	N/A	N/A	N/A	3	Positive	UPDATE-SINGLE-ANNOTATED-BRONZE	Bronze	772	spectra_filtered/specs_ms.mgf	lib-00036.mgf	0.545085	GNPS-NIST14-MATCHES	176	0	1.56737	3	0.000396729	253.118	253.118	1	spectra_filtered/specs_ms.mgf772	1		26	2041	N/A	N/A	N/A	N/A	N/A	N/A	N/A	N/A
CCMSLIB00000221612	Massbank:PB000320 Caffeoylcholine|2-[(E)-3-(3,4-dihydroxyphenyl)prop-2-enoyl]oxyethyl-trimethylazanium	ESI	LC-ESI-QTOF	Isolated	Putative Massbank Match	Massbank	M+	266.139	0	1	N/A	N/A	C[N+](C)(C)CCOC(=O)C=CC1=CC(=C(C=C1)O)O	1S/C14H19NO4/c1-15(2,3)8-9-19-14(18)7-5-11-4-6-12(16)13(17)10-11/h4-7,10H,8-9H2,1-3H3,(H-,16,17,18)/p+1	N/A	3	Positive	UPDATE-SINGLE-ANNOTATED-BRONZE	Bronze	838	spectra_filtered/specs_ms.mgf	lib-00004.mgf	0.594921	MASSBANK	200	0	1.14668	4	0.000305176	266.139	266.139	1	spectra_filtered/specs_ms.mgf838	1		3	8	HLGBXKIGYXVIFU-UHFFFAOYSA-O	HLGBXKIGYXVIFU	Phenylpropanoids and polyketides	Cinnamic acids and derivatives	Hydroxycinnamic acids and derivatives	N/A	N/A	N/A
CCMSLIB00000222428	Massbank:PB006010 Adenosine|(2R,3R,4S,5R)-2-(6-aminopurin-9-yl)-5-(hydroxymethyl)oxolane-3,4-diol	ESI	LC-ESI-QTOF	Isolated	Putative Massbank Match	Massbank	[M+H]+	268.105	0	1	N/A	N/A	C1=NC2=C(C(=N1)N)N=CN2C3C(C(C(O3)CO)O)O	1S/C10H13N5O4/c11-8-5-9(13-2-12-8)15(3-14-5)10-7(18)6(17)4(1-16)19-10/h2-4,6-7,10,16-18H,1H2,(H2,11,12,13)/t4-,6-,7-,10-/m1/s1	N/A	3	Positive	UPDATE-SINGLE-ANNOTATED-BRONZE	Bronze	844	spectra_filtered/specs_ms.mgf	lib-00004.mgf	0.955999	MASSBANK	2182	0	1.93506	3	0.000518799	268.105	268.104	1	spectra_filtered/specs_ms.mgf844	1		0	0	OIRDTQYFTABQOQ-UHFFFAOYSA-N	OIRDTQYFTABQOQ	N/A	N/A	N/A	Purine nucleosides	Purine nucleosides	Carbohydrates
CCMSLIB00003139726	Spectral Match to Leu-His from NIST14	ESI	Q-TOF	Isolated	Data from Gabriel Haddad	Data deposited by mjmeehan	M+H	269.162	0	1	N/A	N/A	N/A	N/A	N/A	3	Positive	UPDATE-SINGLE-ANNOTATED-BRONZE	Bronze	846	spectra_filtered/specs_ms.mgf	lib-00036.mgf	0.676095	GNPS-NIST14-MATCHES	283	0	45.6921	3	0.0122986	269.162	269.174	1	spectra_filtered/specs_ms.mgf846	1		7	220	N/A	N/A	N/A	N/A	N/A	N/A	N/A	N/A
CCMSLIB00000851214	NCGC00179780-02_C20H32O_(5xi,9xi)-Beyer-15-en-18-ol	LC-ESI	Maxis II HD Q-TOF Bruker	isolated	Jadhav/Dorrestein	lfnothias	M-H2O+H	271.241	288.245	1	n/a	n/a	C[C@]1\2CCC3[C@]4(C)CCC[C@@](C)(CO)C4CC[C@@]3(C1)\C=C2	InChI=1S/C20H32O/c1-17-9-5-16-19(3)8-4-7-18(2,14-21)15(19)6-10-20(16,13-17)12-11-17/h11-12,15-16,21H,4-10,13-14H2,1-3H3/t15?,16?,17-,18+,19-,20+/m1/s1	N/A	1	positive	UPDATE-SINGLE-ANNOTATED-GOLD	Gold	852	spectra_filtered/specs_ms.mgf	lib-00002.mgf	0.548437	GNPS-NIH-NATURALPRODUCTSLIBRARY_ROUND2_POSITIVE	138	0	50.5174	3	0.0137024	271.241	271.255	1	spectra_filtered/specs_ms.mgf852	1		4	16	CIGQQQTZOIDQQR-SGWMQEFOSA-N	CIGQQQTZOIDQQR	Lipids and lipid-like molecules	Prenol lipids	Diterpenoids	Beyerane diterpenoids|Norkaurane diterpenoids	Beyerane diterpenoids|Norkaurane diterpenoids	Terpenoids
CCMSLIB00004719975	kaempferol	N/A	ESI-QTOF	isolated	MoNA	MoNA:VF-NPL-QTOF002169	[M+H]+	287.055	0	1	N/A	N/A	N/A	InChI=1S/C15H10O6/c16-8-3-1-7(2-4-8)15-14(20)13(19)12-10(18)5-9(17)6-11(12)21-15/h1-6,16-18,20H	N/A	3	positive	UPDATE-SINGLE-ANNOTATED-BRONZE	Bronze	932	spectra_filtered/specs_ms.mgf	lib-00032.mgf	0.617234	MONA	403	0	50.4985	8	0.0144958	287.055	287.069	1	spectra_filtered/specs_ms.mgf932	1		2	36	IYRMWMYZSQPJKC-UHFFFAOYSA-N	IYRMWMYZSQPJKC	Phenylpropanoids and polyketides	Flavonoids	Flavones	N/A	N/A	N/A
CCMSLIB00000223091	Massbank:PR100264 (-)-Epicatechin|(-)-3,3',4',5,7-Pentahydroxyflavan|EpCt_mi	ESI	LC-ESI-QTOF	Isolated	Putative Massbank Match	Massbank	[M+H]+	291.087	0	1	490-46-0	N/A	Oc(c3)c(O)cc(c3)C([H])(O1)C([H])(O)Cc(c(O)2)c(cc(O)c2)1	1S/C15H14O6/c16-8-4-11(18)9-6-13(20)15(21-14(9)5-8)7-1-2-10(17)12(19)3-7/h1-5,13,15-20H,6H2/t13-,15-/m1/s1	N/A	3	Positive	UPDATE-SINGLE-ANNOTATED-BRONZE	Bronze	951	spectra_filtered/specs_ms.mgf	lib-00004.mgf	0.963571	MASSBANK	265	0	1.36292	4	0.000396729	291.087	291.087	1	spectra_filtered/specs_ms.mgf951	1		0	0	PFTAWBLQPZVEMU-UHFFFAOYSA-N	PFTAWBLQPZVEMU	Phenylpropanoids and polyketides	Flavonoids	Flavans	Flavan-3-ols	Flavan-3-ols	Shikimates and Phenylpropanoids
CCMSLIB00000221213	ReSpect:PT104550 (+)-Catechin hydrate|Ct|Cyanidanol|Cianidanol|Catechuic Acid|Catechinic acid|catechol|trans-3,3',4',5,7-Pentahydroxyflavane|3,3',4',5,7-Flavanpentol|(2R,3S)-(+)-Catechin|2-(3,4-dihydroxyphenyl)-3,4-di	ESI	LC-Q-TOF/MS	Isolated	Putative ReSpect Match	ReSpect	[M+H]	291.087	0	1	154-23-4	N/A	C1C(C(OC2=CC(=CC(=C21)O)O)C3=CC(=C(C=C3)O)O)O	1/C15H14O6/c16-8-4-11(18)9-6-13(20)15(21-14(9)5-8)7-1-2-10(17)12(19)3-7/h1-5,13,15-20H,6H2/t13-,15+/m0/s1	N/A	3	Positive	UPDATE-SINGLE-ANNOTATED-BRONZE	Bronze	953	spectra_filtered/specs_ms.mgf	lib-00010.mgf	0.830281	RESPECT	619	0	54.3072	4	0.0158081	291.087	291.103	1	spectra_filtered/specs_ms.mgf953	1		0	0	PFTAWBLQPZVEMU-UHFFFAOYSA-N	PFTAWBLQPZVEMU	Phenylpropanoids and polyketides	Flavonoids	Flavans	Flavan-3-ols	Flavan-3-ols	Shikimates and Phenylpropanoids
CCMSLIB00000223011	Massbank:PR100182 Nicotinamide|NAM|Vitamin B3|Vitamin PP|Niacinamide|Nicotinic acid amide|Pyridine-3-carboxylic acid amide|Amide PP|Benicot|Delonin amide|Amnicotin|Endobion|Nicobion|Pelonin amide|3-Pyridinecarboxamide	ESI	LC-ESI-QTOF	Isolated	Putative Massbank Match	Massbank	[M+H]+	123.056	0	1	98-92-0	N/A	NC(=O)c(c1)cncc1	1S/C6H6N2O/c7-6(9)5-2-1-3-8-4-5/h1-4H,(H2,7,9)	N/A	3	Positive	UPDATE-SINGLE-ANNOTATED-BRONZE	Bronze	96	spectra_filtered/specs_ms.mgf	lib-00004.mgf	0.956998	MASSBANK	116	0	9.7339	4	0.00119781	123.056	123.055	1	spectra_filtered/specs_ms.mgf96	1		0	0	DFPAKSUCGFBDDF-UHFFFAOYSA-N	DFPAKSUCGFBDDF	Organoheterocyclic compounds	Pyridines and derivatives	Pyridinecarboxylic acids and derivatives	Pyridine alkaloids	Pyridine alkaloids	Alkaloids
CCMSLIB00000223011	Massbank:PR100182 Nicotinamide|NAM|Vitamin B3|Vitamin PP|Niacinamide|Nicotinic acid amide|Pyridine-3-carboxylic acid amide|Amide PP|Benicot|Delonin amide|Amnicotin|Endobion|Nicobion|Pelonin amide|3-Pyridinecarboxamide	ESI	LC-ESI-QTOF	Isolated	Putative Massbank Match	Massbank	[M+H]+	123.056	0	1	98-92-0	N/A	NC(=O)c(c1)cncc1	1S/C6H6N2O/c7-6(9)5-2-1-3-8-4-5/h1-4H,(H2,7,9)	N/A	3	Positive	UPDATE-SINGLE-ANNOTATED-BRONZE	Bronze	97	spectra_filtered/specs_ms.mgf	lib-00004.mgf	0.735454	MASSBANK	229	0	8.92791	3	0.00109863	123.056	123.055	1	spectra_filtered/specs_ms.mgf97	1		0	0	DFPAKSUCGFBDDF-UHFFFAOYSA-N	DFPAKSUCGFBDDF	Organoheterocyclic compounds	Pyridines and derivatives	Pyridinecarboxylic acids and derivatives	Pyridine alkaloids	Pyridine alkaloids	Alkaloids
CCMSLIB00000223011	Massbank:PR100182 Nicotinamide|NAM|Vitamin B3|Vitamin PP|Niacinamide|Nicotinic acid amide|Pyridine-3-carboxylic acid amide|Amide PP|Benicot|Delonin amide|Amnicotin|Endobion|Nicobion|Pelonin amide|3-Pyridinecarboxamide	ESI	LC-ESI-QTOF	Isolated	Putative Massbank Match	Massbank	[M+H]+	123.056	0	1	98-92-0	N/A	NC(=O)c(c1)cncc1	1S/C6H6N2O/c7-6(9)5-2-1-3-8-4-5/h1-4H,(H2,7,9)	N/A	3	Positive	UPDATE-SINGLE-ANNOTATED-BRONZE	Bronze	98	spectra_filtered/specs_ms.mgf	lib-00004.mgf	0.845455	MASSBANK	342	0	8.92791	3	0.00109863	123.056	123.055	1	spectra_filtered/specs_ms.mgf98	1		0	0	DFPAKSUCGFBDDF-UHFFFAOYSA-N	DFPAKSUCGFBDDF	Organoheterocyclic compounds	Pyridines and derivatives	Pyridinecarboxylic acids and derivatives	Pyridine alkaloids	Pyridine alkaloids	Alkaloids
CCMSLIB00000577895	5'-METHYLTHIOADENOSINE	LC-ESI	Q-Exactive Plus	Commercial standard	Alexandrov Theodore	Prasad	M+H	298.1	297.09	0	2457-80-9	439176	CSCC1C(C(C(O1)N2C=NC3=C2N=CN=C3N)O)O	N/A	N/A	1	Positive	UPDATE-SINGLE-ANNOTATED-GOLD	Gold	992	spectra_filtered/specs_ms.mgf	lib-00017.mgf	0.92875	GNPS-EMBL-MCF	946	0	41.5637	3	0.0123901	298.1	298.112	1	spectra_filtered/specs_ms.mgf992	1		35	2442	WUUGFSXJNOTRMR-UHFFFAOYSA-N	WUUGFSXJNOTRMR	Nucleosides, nucleotides, and analogues	5'-deoxyribonucleosides	5'-deoxy-5'-thionucleosides	Purine nucleosides	Purine nucleosides	Carbohydrates

## Sheet: FBMN_negative_ion_mode
Table S3 Feature-based molecular networking (FBMN) for the acquired metabolome dataset.
SpectrumID	Compound_Name	Ion_Source	Instrument	Compound_Source	PI	Data_Collector	Adduct	Precursor_MZ	ExactMass	Charge	CAS_Number	Pubmed_ID	Smiles	INCHI	INCHI_AUX	Library_Class	IonMode	UpdateWorkflowName	LibraryQualityString	#Scan#	SpectrumFile	LibraryName	MQScore	Organism	TIC_Query	RT_Query	MZErrorPPM	SharedPeaks	MassDiff	LibMZ	SpecMZ	SpecCharge	FileScanUniqueID	NumberHits	tags	MoleculeExplorerDatasets	MoleculeExplorerFiles	InChIKey	InChIKey-Planar	superclass	class	subclass	npclassifier_superclass	npclassifier_class	npclassifier_pathway
CCMSLIB00005467937	Caffeic acid	LC-ESI	qTof	Isolated	Claudia Maier	Armando Alcazar	M-H	179.04	0	1						3	Negative	UPDATE-SINGLE-ANNOTATED-BRONZE	Bronze	104	spectra_filtered/specs_ms.mgf	lib-00014.mgf	0.94052	GNPS-LIBRARY	133	0	31.7891	3	0.00569153	179.04	179.034	1	spectra_filtered/specs_ms.mgf104	1		4	202	N/A	N/A	N/A	N/A	N/A	N/A	N/A	N/A
CCMSLIB00005464173	CAFFEATE	ESI	Orbitrap	Commercial	Dorrestein	Kelly Weldon	M-H	179.035	180.042	-1	331-39-5	N/A	OC(=O)\C=C/C1=CC=C(O)C(O)=C1	"InChI=1S/C9H8O4/c10-7-3-1-6(5-8(7)11)2-4-9(12)13/h1-5,10-11H,(H,12,13)/b4-2-"	N/A	1	Negative	UPDATE-SINGLE-ANNOTATED-GOLD	Gold	105	spectra_filtered/specs_ms.mgf	lib-00016.mgf	0.724951	GNPS-MSMLS	291	0	3.40912	4	0.000610352	179.035	179.034	1	spectra_filtered/specs_ms.mgf105	1		8	294	QAIPRVGONGVQAS-RQOWECAXSA-N	QAIPRVGONGVQAS	Phenylpropanoids and polyketides	Cinnamic acids and derivatives	Hydroxycinnamic acids and derivatives	Cinnamic acids and derivatives	Cinnamic acids and derivatives	Shikimates and Phenylpropanoids
CCMSLIB00004683265	Glc-Glc-octadecatrienoyl-sn-glycerol (isomer 2) (PUT) - 45.8016eV	LC-ESI	impact HD	Isolated	Sumner	Sumner	M-H	721.372	0	1	N/A	N/A	N/A	N/A	N/A	3	Negative	UPDATE-SINGLE-ANNOTATED-BRONZE	Bronze	1057	spectra_filtered/specs_ms.mgf	lib-00033.mgf	0.523854	SUMNER	1291	0	12.0992	8	0.00872803	721.372	721.363	1	spectra_filtered/specs_ms.mgf1057	1		3	272	N/A	N/A	N/A	N/A	N/A	N/A	N/A	N/A
CCMSLIB00004706271	[(2R,3S,4S,5R,6S)-6-[(2S,3R,4R,5R,6S)-2-[5,7-dihydroxy-2-(4-hydroxyphenyl)-4-oxochromen-3-yl]oxy-4,5-dihydroxy-6-methyloxan-3-yl]oxy-3,4,5-trihydroxyoxan-2-yl]methyl (E)-3-(4-hydroxyphenyl)prop-2-enoate	N/A	ESI-QFT	isolated	MoNA	MoNA:VF-NPL-QEHF015208	[M-H]-	739.188	0	1	N/A	N/A	N/A	InChI=1S/C36H36O17/c1-15-26(42)30(46)34(53-35-31(47)29(45)27(43)23(51-35)14-48-24(41)11-4-16-2-7-18(37)8-3-16)36(49-15)52-33-28(44)25-21(40)12-20(39)13-22(25)50-32(33)17-5-9-19(38)10-6-17/h2-13,15,23,26-27,29-31,34-40,42-43,45-47H,14H2,1H3/b11-4+/t15-,23+,26-,27+,29-,30+,31+,34+,35-,36-/m0/s1	N/A	3	negative	UPDATE-SINGLE-ANNOTATED-BRONZE	Bronze	1066	spectra_filtered/specs_ms.mgf	lib-00032.mgf	0.591256	MONA	334	0	25.8446	7	0.019104	739.188	739.169	1	spectra_filtered/specs_ms.mgf1066	1		0	0	KAJMZANRKFVVKV-RGXKZFLBSA-N	KAJMZANRKFVVKV	Phenylpropanoids and polyketides	Flavonoids	Flavonoid glycosides	N/A	N/A	N/A
CCMSLIB00000578370	D-FRUCTOSE	LC-ESI	Q-Exactive Plus	Commercial standard	Alexandrov Theodore	Prasad	M-H	179.056	180.063	0	57-48-7	439163	OCC(=O)[C@@H](O)[C@@H](O)[C@@H](O)CO	N/A	N/A	1	Negative	UPDATE-SINGLE-ANNOTATED-GOLD	Gold	107	spectra_filtered/specs_ms.mgf	lib-00017.mgf	0.610436	GNPS-EMBL-MCF	114	0	5.62439	3	0.00100708	179.056	179.055	1	spectra_filtered/specs_ms.mgf107	1		1	36	BJHIKXHVCXFQLS-ZXEDONINSA-N	BJHIKXHVCXFQLS	Organic oxygen compounds	Organooxygen compounds	Carbohydrates and carbohydrate conjugates	Monosaccharides	Monosaccharides	Carbohydrates
CCMSLIB00004719474	1,2,3,6-tetragalloylglucose	N/A	ESI-QTOF	isolated	MoNA	MoNA:VF-NPL-QTOF001742	[M-H]-	787.1	0	1	N/A	N/A	N/A	InChI=1S/C34H28O22/c3514110(215(36)23(14)43)30(48)5292227(47)28(5431(49)11316(37)24(44)17(38)411)29(5532(50)12518(39)25(45)19(40)612)34(5322)5633(51)13720(41)26(46)21(42)813/h18,22,2729,3447H,9H2/t22,27,28+,29,34+/m1/s1	N/A	3	negative	UPDATE-SINGLE-ANNOTATED-BRONZE	Bronze	1084	spectra_filtered/specs_ms.mgf	lib-00032.mgf	0.581642	MONA	469	0	1.16317	8	0.000915527	787.1	787.101	1	spectra_filtered/specs_ms.mgf1084	1		0	0	N/A	N/A	N/A	N/A	N/A	N/A	N/A	N/A
CCMSLIB00000846084	NCGC00169133-02![(2R,3R,4S,5R,6S)-3-hydroxy-4,5,6-tris[(3,4,5-trihydroxybenzoyl)oxy]oxan-2-yl]methyl 3,4,5-trihydroxybenzoate	LC-ESI	Maxis II HD Q-TOF Bruker	isolated	Jadhav/Dorrestein	lfnothias	M-H	787.1	788.107	1	n/a	n/a	O[C@@H]1[C@@H](COC(=O)C2=CC(O)=C(O)C(O)=C2)O[C@@H](OC(=O)C3=CC(O)=C(O)C(O)=C3)[C@H](OC(=O)C4=CC(O)=C(O)C(O)=C4)[C@H]1OC(=O)C5=CC(O)=C(O)C(O)=C5	InChI=1S/C34H28O22/c35-14-1-10(2-15(36)23(14)43)30(48)52-9-22-27(47)28(54-31(49)11-3-16(37)24(44)17(38)4-11)29(55-32(50)12-5-18(39)25(45)19(40)6-12)34(53-22)56-33(51)13-7-20(41)26(46)21(42)8-13/h1-8,22,27-29,34-47H,9H2/t22-,27-,28+,29-,34+/m1/s1	N/A	1	negative	UPDATE-SINGLE-ANNOTATED-GOLD	Gold	1085	spectra_filtered/specs_ms.mgf	lib-00025.mgf	0.550423	GNPS-NIH-NATURALPRODUCTSLIBRARY_ROUND2_NEGATIVE	529	0	25.2795	10	0.0198975	787.1	787.12	1	spectra_filtered/specs_ms.mgf1085	1		2	11	RATQVALKDAUZBW-XPMKZLBQSA-N	RATQVALKDAUZBW	N/A	N/A	N/A	Gallotannins	Gallotannins	Shikimates and Phenylpropanoids
CCMSLIB00004719326	beta-penta-O-galloyl-glucose	N/A	ESI-QTOF	isolated	MoNA	MoNA:VF-NPL-QTOF001615	[M-H]-	939.111	0	1	N/A	N/A	N/A	InChI=1S/C41H32O26/c4217112(218(43)28(17)52)36(57)62112733(6437(58)13319(44)29(53)20(45)413)34(6538(59)14521(46)30(54)22(47)614)35(6639(60)15723(48)31(55)24(49)815)41(6327)6740(61)16925(50)32(56)26(51)1016/h110,27,3335,4156H,11H2/t27,33,34+,35,41+/m1/s1	N/A	3	negative	UPDATE-SINGLE-ANNOTATED-BRONZE	Bronze	1116	spectra_filtered/specs_ms.mgf	lib-00032.mgf	0.522866	MONA	830	0	1.36484	10	0.00128174	939.111	939.112	1	spectra_filtered/specs_ms.mgf1116	1		0	0	N/A	N/A	N/A	N/A	N/A	N/A	N/A	N/A
CCMSLIB00003139346	Spectral Match to Citric acid from NIST14	ESI	QqQ	Isolated	Data from Pieter Dorrestein	Data deposited by daniel	M-H	191.02	0	1	77929	N/A	N/A	N/A	N/A	3	Negative	UPDATE-SINGLE-ANNOTATED-BRONZE	Bronze	120	spectra_filtered/specs_ms.mgf	lib-00036.mgf	0.944714	GNPS-NIST14-MATCHES	1694	0	12.062	5	0.00230408	191.02	191.018	1	spectra_filtered/specs_ms.mgf120	1		4	466	N/A	N/A	N/A	N/A	N/A	N/A	N/A	N/A
CCMSLIB00003139346	Spectral Match to Citric acid from NIST14	ESI	QqQ	Isolated	Data from Pieter Dorrestein	Data deposited by daniel	M-H	191.02	0	1	77929	N/A	N/A	N/A	N/A	3	Negative	UPDATE-SINGLE-ANNOTATED-BRONZE	Bronze	124	spectra_filtered/specs_ms.mgf	lib-00036.mgf	0.912149	GNPS-NIST14-MATCHES	895	0	8.38746	4	0.00160217	191.02	191.018	1	spectra_filtered/specs_ms.mgf124	1		4	466	N/A	N/A	N/A	N/A	N/A	N/A	N/A	N/A
CCMSLIB00000479610	Citric acid	DI-ESI	Orbitrap	Commercial	Alexandrov Theodore	Prasad	M-H	191.035	192.027	1	77-92-9	19782904	N/A	"InChI=1S/C6H8O7/c7-3(8)1-6(13,5(11)12)2-4(9)10/h13H,1-2H2,(H,7,8)(H,9,10)(H,11,12)"	KRKNYBCHXYNGOX-UHFFFAOYSA-N	1	Negative	UPDATE-SINGLE-ANNOTATED-GOLD	Gold	125	spectra_filtered/specs_ms.mgf	lib-00017.mgf	0.934909	GNPS-EMBL-MCF	777	0	83.7882	5	0.0160065	191.035	191.019	1	spectra_filtered/specs_ms.mgf125	1		21	717	N/A	N/A	N/A	N/A	N/A	N/A	N/A	N/A
CCMSLIB00003139346	Spectral Match to Citric acid from NIST14	ESI	QqQ	Isolated	Data from Pieter Dorrestein	Data deposited by daniel	M-H	191.02	0	1	77929	N/A	N/A	N/A	N/A	3	Negative	UPDATE-SINGLE-ANNOTATED-BRONZE	Bronze	126	spectra_filtered/specs_ms.mgf	lib-00036.mgf	0.877216	GNPS-NIST14-MATCHES	1470	0	1.59761	4	0.000305176	191.02	191.02	1	spectra_filtered/specs_ms.mgf126	1		4	466	N/A	N/A	N/A	N/A	N/A	N/A	N/A	N/A
CCMSLIB00004702341	Ferulic Acid	N/A	ESI-QFT	isolated	MoNA	MoNA:VF-NPL-QEHF011278	[M-H]-	193.051	0	1	N/A	N/A	N/A	InChI=1S/C10H10O4/c1-14-9-6-7(2-4-8(9)11)3-5-10(12)13/h2-6,11H,1H3,(H,12,13)/b5-3+	N/A	3	negative	UPDATE-SINGLE-ANNOTATED-BRONZE	Bronze	133	spectra_filtered/specs_ms.mgf	lib-00032.mgf	0.852949	MONA	284	0	7.19266	3	0.00138855	193.051	193.05	1	spectra_filtered/specs_ms.mgf133	1		0	0	KSEBMYQBYZTDHS-HWKANZROSA-N	KSEBMYQBYZTDHS	Phenylpropanoids and polyketides	Cinnamic acids and derivatives	Hydroxycinnamic acids and derivatives	N/A	N/A	N/A
CCMSLIB00005464424	GLUCONATE	ESI	Orbitrap	Commercial	Dorrestein	Kelly Weldon	M-H	195.051	196.058	-1	527-07-1	N/A	OC[C@@H](O)[C@@H](O)[C@H](O)[C@@H](O)C(O)=O	"InChI=1S/C6H12O7/c7-1-2(8)3(9)4(10)5(11)6(12)13/h2-5,7-11H,1H2,(H,12,13)/t2-,3-,4+,5-/m1/s1"	N/A	1	Negative	UPDATE-SINGLE-ANNOTATED-GOLD	Gold	138	spectra_filtered/specs_ms.mgf	lib-00016.mgf	0.600112	GNPS-MSMLS	120	0	5.08493	4	0.000991821	195.051	195.05	1	spectra_filtered/specs_ms.mgf138	1		0	0	RGHNJXZEOKUKBD-SQOUGZDYSA-N	RGHNJXZEOKUKBD	Organic oxygen compounds	Organooxygen compounds	Carbohydrates and carbohydrate conjugates	Monosaccharides	Monosaccharides	Carbohydrates
CCMSLIB00003139340	Spectral Match to L-Tryptophan from NIST14	ESI	HCD	Isolated	Data from Pieter Dorrestein	Data deposited by daniel	M-H	203.083	0	1	73223	N/A	N/A	N/A	N/A	3	Negative	UPDATE-SINGLE-ANNOTATED-BRONZE	Bronze	160	spectra_filtered/specs_ms.mgf	lib-00036.mgf	0.880227	GNPS-NIST14-MATCHES	383	0	9.91792	3	0.00201416	203.083	203.085	1	spectra_filtered/specs_ms.mgf160	1		216	30170	N/A	N/A	N/A	N/A	N/A	N/A	N/A	N/A
CCMSLIB00000578199	GALACTARATE	LC-ESI	Q-Exactive Plus	Commercial standard	Alexandrov Theodore	Prasad	M-H	209.03	210.038	0	526-99-8	3037582	C(C(C(C(=O)O)O)O)(C(C(=O)O)O)O	N/A	N/A	1	Negative	UPDATE-SINGLE-ANNOTATED-GOLD	Gold	170	spectra_filtered/specs_ms.mgf	lib-00017.mgf	0.730622	GNPS-EMBL-MCF	191	0	6.20484	5	0.001297	209.03	209.029	1	spectra_filtered/specs_ms.mgf170	1		2	19	DSLZVSRJTYRBFB-UHFFFAOYSA-N	DSLZVSRJTYRBFB	Organic oxygen compounds	Organooxygen compounds	Carbohydrates and carbohydrate conjugates	Dicarboxylic acids	Dicarboxylic acids	Fatty acids
CCMSLIB00005464433	GALACTARATE	ESI	Orbitrap	Commercial	Dorrestein	Kelly Weldon	M-H	209.03	210.038	-1	526-99-8	N/A	O[C@@H]([C@@H](O)[C@H](O)C(O)=O)[C@@H](O)C(O)=O	"InChI=1S/C6H10O8/c7-1(3(9)5(11)12)2(8)4(10)6(13)14/h1-4,7-10H,(H,11,12)(H,13,14)/t1-,2+,3+,4-"	N/A	1	Negative	UPDATE-SINGLE-ANNOTATED-GOLD	Gold	171	spectra_filtered/specs_ms.mgf	lib-00016.mgf	0.754116	GNPS-MSMLS	92	0	4.74488	3	0.000991821	209.03	209.029	1	spectra_filtered/specs_ms.mgf171	1		2	19	DSLZVSRJTYRBFB-DUHBMQHGSA-N	DSLZVSRJTYRBFB	Organic oxygen compounds	Organooxygen compounds	Carbohydrates and carbohydrate conjugates	Dicarboxylic acids	Dicarboxylic acids	Fatty acids
CCMSLIB00000222547	ReSpect:PT210060 D-Pantothenic acid hemicalcium salt|Vitamin B5|D-Pantothenic Acid|(R)-Pantothenate|(R)-(+)-N-(2,4-Dihydroxy-3,3-dimethyl-1-oxobutyl)-beta-alanine|3-[[(2R)-2,4-dihydroxy-3,3-dimethylbutanoyl]amino]prop	ESI	LC-Q-TOF/MS	Isolated	Putative ReSpect Match	ReSpect	[M+H]	218.103	0	1	79-83-4	N/A	CC(C)(CO)C(C(=O)NCCC(=O)O)O	1/C9H17NO5/c1-9(2,5-11)7(14)8(15)10-4-3-6(12)13/h7,11,14H,3-5H2,1-2H3,(H,10,15)(H,12,13)/t7-/m0/s1/f/h10,12H	N/A	3	Positive	UPDATE-SINGLE-ANNOTATED-BRONZE	Bronze	184	spectra_filtered/specs_ms.mgf	lib-00010.mgf	0.765218	RESPECT	193	0	1.819	3	0.000396729	218.103	218.103	1	spectra_filtered/specs_ms.mgf184	1		0	0	GHOKWGTUZJEAQD-UHFFFAOYSA-N	GHOKWGTUZJEAQD	Organic acids and derivatives	Carboxylic acids and derivatives	Amino acids, peptides, and analogues	N-acyl amines	N-acyl amines	Fatty acids
CCMSLIB00004691913	N-acetyltryptophan	N/A	ESI-QFT	isolated	MoNA	MoNA:VF-NPL-QEHF000850	[M-H]-	245.093	0	1	N/A	N/A	N/A	InChI=1S/C13H14N2O3/c1-8(16)15-12(13(17)18)6-9-7-14-11-5-3-2-4-10(9)11/h2-5,7,12,14H,6H2,1H3,(H,15,16)(H,17,18)	N/A	3	negative	UPDATE-SINGLE-ANNOTATED-BRONZE	Bronze	221	spectra_filtered/specs_ms.mgf	lib-00032.mgf	0.62184	MONA	141	0	2.42803	4	0.000595093	245.093	245.092	1	spectra_filtered/specs_ms.mgf221	1		0	0	DZTHIGRZJZPRDV-UHFFFAOYSA-N	DZTHIGRZJZPRDV	Organic acids and derivatives	Carboxylic acids and derivatives	Amino acids, peptides, and analogues	N/A	N/A	N/A
CCMSLIB00005464423	MANNOSE 6-PHOSPHATE	ESI	Orbitrap	Commercial	Dorrestein	Kelly Weldon	M-H	259.022	260.03	-1	104872-94-8	N/A	O[C@@H]1O[C@H](COP(O)(O)=O)[C@@H](O)[C@H](O)[C@@H]1O	"InChI=1S/C6H13O9P/c7-3-2(1-14-16(11,12)13)15-6(10)5(9)4(3)8/h2-10H,1H2,(H2,11,12,13)/t2-,3-,4+,5+,6-/m1/s1"	N/A	1	Negative	UPDATE-SINGLE-ANNOTATED-GOLD	Gold	239	spectra_filtered/specs_ms.mgf	lib-00016.mgf	0.82319	GNPS-MSMLS	474	0	15.0808	5	0.00390625	259.022	259.026	1	spectra_filtered/specs_ms.mgf239	1		0	0	NBSCHQHZLSJFNQ-RWOPYEJCSA-N	NBSCHQHZLSJFNQ	Organic oxygen compounds	Organooxygen compounds	Carbohydrates and carbohydrate conjugates	Monosaccharides	Monosaccharides	Carbohydrates
CCMSLIB00000569449	MoNA:2849131 Abscisic acid	LC-ESI-QTOF	LC-ESI-QTOF	isolated	MoNA	MoNA	[M-H]-	263.129	0	1	N/A	N/A	N/A	InChI=1S/C15H20O4/c1-10(7-13(17)18)5-6-15(19)11(2)8-12(16)9-14(15,3)4/h5-8,19H,9H2,1-4H3,(H,17,18)	N/A	3		UPDATE-SINGLE-ANNOTATED-BRONZE	Bronze	247	spectra_filtered/specs_ms.mgf	lib-00032.mgf	0.784796	MONA	224	0	4.5232	3	0.00119019	263.129	263.128	1	spectra_filtered/specs_ms.mgf247	1		0	0	JLIDBLDQVAYHNE-UHFFFAOYSA-N	JLIDBLDQVAYHNE	Lipids and lipid-like molecules	Prenol lipids	Sesquiterpenoids	N/A	N/A	N/A
CCMSLIB00004717614	Catechin	N/A	ESI-QTOF	isolated	MoNA	MoNA:VF-NPL-QTOF000120	[M-H]-	289.072	0	1	N/A	N/A	N/A	InChI=1S/C15H14O6/c16-8-4-11(18)9-6-13(20)15(21-14(9)5-8)7-1-2-10(17)12(19)3-7/h1-5,13,15-20H,6H2/t13-,15-/m1/s1	N/A	3	negative	UPDATE-SINGLE-ANNOTATED-BRONZE	Bronze	283	spectra_filtered/specs_ms.mgf	lib-00032.mgf	0.50963	MONA	177	0	7.6011	3	0.00219727	289.072	289.07	1	spectra_filtered/specs_ms.mgf283	1		25	2254	PFTAWBLQPZVEMU-UKRRQHHQSA-N	PFTAWBLQPZVEMU	Phenylpropanoids and polyketides	Flavonoids	Flavans	N/A	N/A	N/A
CCMSLIB00004717615	Catechin	N/A	ESI-QTOF	isolated	MoNA	MoNA:VF-NPL-QTOF000121	[M-H]-	289.072	0	1	N/A	N/A	N/A	InChI=1S/C15H14O6/c16-8-4-11(18)9-6-13(20)15(21-14(9)5-8)7-1-2-10(17)12(19)3-7/h1-5,13,15-20H,6H2/t13-,15-/m1/s1	N/A	3	negative	UPDATE-SINGLE-ANNOTATED-BRONZE	Bronze	284	spectra_filtered/specs_ms.mgf	lib-00032.mgf	0.708138	MONA	684	0	2.00585	9	0.000579834	289.072	289.071	1	spectra_filtered/specs_ms.mgf284	1		25	2254	PFTAWBLQPZVEMU-UKRRQHHQSA-N	PFTAWBLQPZVEMU	Phenylpropanoids and polyketides	Flavonoids	Flavans	N/A	N/A	N/A
CCMSLIB00000081482	Epigallocatechin	DI-ESI	qTof	Isolated	Norberto Lopes	Denise Silva	M-H	305.059	306.074	1	970-74-1	N/A	OC1=C(C[C@@H](O)[C@@H](C2=CC(O)=C(O)C(O)=C2)O3)C3=CC(O)=C1	InChI=1S/C15H14O7/c16-7-3-9(17)8-5-12(20)15(22-13(8)4-7)6-1-10(18)14(21)11(19)2-6/h1-4,12,15-21H,5H2/t12-,15-/m1/s1	N/A	3	Negative	UPDATE-SINGLE-ANNOTATED-BRONZE	Bronze	308	spectra_filtered/specs_ms.mgf	lib-00014.mgf	0.56058	GNPS-LIBRARY	339	0	21.7083	3	0.00662231	305.059	305.066	1	spectra_filtered/specs_ms.mgf308	1		8	228	XMOCLSLCDHWDHP-IUODEOHRSA-N	XMOCLSLCDHWDHP	Phenylpropanoids and polyketides	Flavonoids	Flavans	Flavan-3-ols	Flavan-3-ols	Shikimates and Phenylpropanoids
CCMSLIB00004720142	(2S,3S)-2-(3,4,5-trihydroxyphenyl)-3,4-dihydro-2H-chromene-3,5,7-triol	N/A	ESI-QTOF	isolated	MoNA	MoNA:VF-NPL-QTOF002309	[M-H]-	305.067	0	1	N/A	N/A	N/A	InChI=1S/C15H14O7/c16-7-3-9(17)8-5-12(20)15(22-13(8)4-7)6-1-10(18)14(21)11(19)2-6/h1-4,12,15-21H,5H2/t12-,15-/m0/s1	N/A	3	negative	UPDATE-SINGLE-ANNOTATED-BRONZE	Bronze	309	spectra_filtered/specs_ms.mgf	lib-00032.mgf	0.743927	MONA	812	0	4.2015	8	0.00128174	305.067	305.066	1	spectra_filtered/specs_ms.mgf309	1		0	0	XMOCLSLCDHWDHP-WFASDCNBSA-N	XMOCLSLCDHWDHP	Phenylpropanoids and polyketides	Flavonoids	Flavans	N/A	N/A	N/A
CCMSLIB00004722172	12-Hydroxyjasmonate sulfate	LC-ESI	Orbitrap	Commercial	Ales Svatos	Riya Menezes	M-H	305.07	0	1						3	Negative	UPDATE-SINGLE-ANNOTATED-BRONZE	Bronze	310	spectra_filtered/specs_ms.mgf	lib-00014.mgf	0.575135	GNPS-LIBRARY	215	0	6.20215	3	0.00189209	305.07	305.068	1	spectra_filtered/specs_ms.mgf310	1		0	0	N/A	N/A	N/A	N/A	N/A	N/A	N/A	N/A
CCMSLIB00004751314	Porphyrilic acid	LC-ESI	qTof	Isolated	Joel BOUSTIE Pierre LE POGAM	Damien OLIVIER	M-H	313.03	314.043	1	N/A	N/A	OC1=CC2=C(C3=C1C(OC3)=O)C4=C(O)C=C(C)C(C(O)=O)=C4O2	N/A	N/A	3	Negative	UPDATE-SINGLE-ANNOTATED-BRONZE	Bronze	326	spectra_filtered/specs_ms.mgf	lib-00022.mgf	0.590676	LDB_NEGATIVE	145	0	7.01935	3	0.00219727	313.03	313.032	1	spectra_filtered/specs_ms.mgf326	1		0	0	QZYZPZAPRHESDA-UHFFFAOYSA-N	QZYZPZAPRHESDA	Organoheterocyclic compounds	Benzofurans	Dibenzofurans	Methyl xanthones	Methyl xanthones	Polyketides
CCMSLIB00004695277	skimmin	N/A	ESI-QFT	isolated	MoNA	MoNA:VF-NPL-QEHF004214	[M+H]+	325.092	0	1	N/A	N/A	N/A	InChI=1S/C15H16O8/c16-6-10-12(18)13(19)14(20)15(23-10)21-8-3-1-7-2-4-11(17)22-9(7)5-8/h1-5,10,12-16,18-20H,6H2/t10-,12-,13+,14-,15-/m1/s1	N/A	3	positive	UPDATE-SINGLE-ANNOTATED-BRONZE	Bronze	338	spectra_filtered/specs_ms.mgf	lib-00032.mgf	0.77213	MONA	465	0	1.22036	3	0.000396729	325.092	325.092	1	spectra_filtered/specs_ms.mgf338	1		0	0	VPAOSFFTKWUGAD-TVKJYDDYSA-N	VPAOSFFTKWUGAD	Phenylpropanoids and polyketides	Coumarins and derivatives	Coumarin glycosides	N/A	N/A	N/A
CCMSLIB00004716860	Bergenin	N/A	ESI-QFT	isolated	MoNA	MoNA:VF-NPL-QEHF025797	[M-H]-	327.072	0	1	N/A	N/A	N/A	InChI=1S/C14H16O9/c1-21-11-5(16)2-4-7(9(11)18)12-13(23-14(4)20)10(19)8(17)6(3-15)22-12/h2,6,8,10,12-13,15-19H,3H2,1H3/t6-,8-,10+,12+,13-/m1/s1	N/A	3	negative	UPDATE-SINGLE-ANNOTATED-BRONZE	Bronze	347	spectra_filtered/specs_ms.mgf	lib-00032.mgf	0.519858	MONA	329	0	0.373222	3	0.00012207	327.072	327.072	1	spectra_filtered/specs_ms.mgf347	1		2	129	YWJXCIXBAKGUKZ-HJJNZUOJSA-N	YWJXCIXBAKGUKZ	Benzenoids	Benzene and substituted derivatives	Benzoic acids and derivatives	N/A	N/A	N/A
CCMSLIB00000221851	ReSpect:PT202020 D-(+)-Trehalose dihydrate,from Saccharomyces cerevisiae|Glc(alpha1-1alpha)Glc|alpha-alpha-Trehalose|Mycose|alpha-D-Glucopyranosyl-alpha-D-glucopyranoside dihydrate|(2R,3S,4S,5R,6R)-2-(hydroxymethyl)-6	ESI	LC-Q-TOF/MS	Isolated	Putative ReSpect Match	ReSpect	[M+H]	341.108	0	1	99-20-7	N/A	C(C1C(C(C(C(O1)OC2C(C(C(C(O2)CO)O)O)O)O)O)O)O	1/C12H22O11/c13-1-3-5(15)7(17)9(19)11(21-3)23-12-10(20)8(18)6(16)4(2-14)22-12/h3-20H,1-2H2/t3-,4-,5-,6-,7+,8+,9-,10-,11-,12-/m1/s1	N/A	3	Positive	UPDATE-SINGLE-ANNOTATED-BRONZE	Bronze	382	spectra_filtered/specs_ms.mgf	lib-00010.mgf	0.723694	RESPECT	392	0	2.95238	6	0.00100708	341.108	341.107	1	spectra_filtered/specs_ms.mgf382	1		0	0	HDTRYLNUVZCQOY-UHFFFAOYSA-N	HDTRYLNUVZCQOY	Organic oxygen compounds	Organooxygen compounds	Carbohydrates and carbohydrate conjugates	Disaccharides	Disaccharides	Carbohydrates
CCMSLIB00000221851	ReSpect:PT202020 D-(+)-Trehalose dihydrate,from Saccharomyces cerevisiae|Glc(alpha1-1alpha)Glc|alpha-alpha-Trehalose|Mycose|alpha-D-Glucopyranosyl-alpha-D-glucopyranoside dihydrate|(2R,3S,4S,5R,6R)-2-(hydroxymethyl)-6	ESI	LC-Q-TOF/MS	Isolated	Putative ReSpect Match	ReSpect	[M+H]	341.108	0	1	99-20-7	N/A	C(C1C(C(C(C(O1)OC2C(C(C(C(O2)CO)O)O)O)O)O)O)O	1/C12H22O11/c13-1-3-5(15)7(17)9(19)11(21-3)23-12-10(20)8(18)6(16)4(2-14)22-12/h3-20H,1-2H2/t3-,4-,5-,6-,7+,8+,9-,10-,11-,12-/m1/s1	N/A	3	Positive	UPDATE-SINGLE-ANNOTATED-BRONZE	Bronze	383	spectra_filtered/specs_ms.mgf	lib-00010.mgf	0.555491	RESPECT	267	0	1.43146	4	0.000488281	341.108	341.108	1	spectra_filtered/specs_ms.mgf383	1		0	0	HDTRYLNUVZCQOY-UHFFFAOYSA-N	HDTRYLNUVZCQOY	Organic oxygen compounds	Organooxygen compounds	Carbohydrates and carbohydrate conjugates	Disaccharides	Disaccharides	Carbohydrates
CCMSLIB00003140029	Spectral Match to D-(+)-Trehalose from NIST14	ESI	QqQ	Isolated	Data from Sambles	Data deposited by rsilva	M-H	341.113	0	1	99207	N/A	N/A	N/A	N/A	3	Negative	UPDATE-SINGLE-ANNOTATED-BRONZE	Bronze	385	spectra_filtered/specs_ms.mgf	lib-00036.mgf	0.843257	GNPS-NIST14-MATCHES	265	0	12.8829	8	0.00439453	341.113	341.109	1	spectra_filtered/specs_ms.mgf385	1		25	927	N/A	N/A	N/A	N/A	N/A	N/A	N/A	N/A
CCMSLIB00004697697	3-[4-methoxy-2-[(2S,3R,4S,5S,6R)-3,4,5-trihydroxy-6-(hydroxymethyl)oxan-2-yl]oxyphenyl]propanoic acid	N/A	ESI-QFT	isolated	MoNA	MoNA:VF-NPL-QEHF006634	[M-H]-	357.119	0	1	N/A	N/A	N/A	InChI=1S/C16H22O9/c1-23-9-4-2-8(3-5-12(18)19)10(6-9)24-16-15(22)14(21)13(20)11(7-17)25-16/h2,4,6,11,13-17,20-22H,3,5,7H2,1H3,(H,18,19)/t11-,13-,14+,15-,16-/m1/s1	N/A	3	negative	UPDATE-SINGLE-ANNOTATED-BRONZE	Bronze	407	spectra_filtered/specs_ms.mgf	lib-00032.mgf	0.616694	MONA	178	0	6.15275	3	0.00219727	357.119	357.121	1	spectra_filtered/specs_ms.mgf407	1		0	0	LIVNOUBJFOXZOR-YMILTQATSA-N	LIVNOUBJFOXZOR	Organic oxygen compounds	Organooxygen compounds	Carbohydrates and carbohydrate conjugates	N/A	N/A	N/A
CCMSLIB00004710948	(2S,3S,4S,5R,6R)-6-(3-benzoyloxy-2-hydroxypropoxy)-3,4,5-trihydroxyoxane-2-carboxylic acid	N/A	ESI-QFT	isolated	MoNA	MoNA:VF-NPL-QEHF019885	[M-H]-	371.098	0	1	N/A	N/A	N/A	InChI=1S/C16H20O10/c17-9(6-24-15(23)8-4-2-1-3-5-8)7-25-16-12(20)10(18)11(19)13(26-16)14(21)22/h1-5,9-13,16-20H,6-7H2,(H,21,22)/t9?,10-,11-,12+,13-,16+/m0/s1	N/A	3	negative	UPDATE-SINGLE-ANNOTATED-BRONZE	Bronze	426	spectra_filtered/specs_ms.mgf	lib-00032.mgf	0.730954	MONA	72	0	1.06907	3	0.000396729	371.098	371.098	1	spectra_filtered/specs_ms.mgf426	1		0	0	DLZMKPZOEYKXHQ-MQCRQNCBSA-N	DLZMKPZOEYKXHQ	Organic oxygen compounds	Organooxygen compounds	Carbohydrates and carbohydrate conjugates	N/A	N/A	N/A
CCMSLIB00004714458	2-[2-[(Z)-pent-2-enyl]-3-[3,4,5-trihydroxy-6-(hydroxymethyl)oxan-2-yl]oxycyclopentyl]acetic acid	N/A	ESI-QFT	isolated	MoNA	MoNA:VF-NPL-QEHF023395	[M-H]-	373.187	0	1	N/A	N/A	N/A	InChI=1S/C18H30O8/c1-2-3-4-5-11-10(8-14(20)21)6-7-12(11)25-18-17(24)16(23)15(22)13(9-19)26-18/h3-4,10-13,15-19,22-24H,2,5-9H2,1H3,(H,20,21)/b4-3-	N/A	3	negative	UPDATE-SINGLE-ANNOTATED-BRONZE	Bronze	431	spectra_filtered/specs_ms.mgf	lib-00032.mgf	0.604054	MONA	130	0	6.7056	5	0.00250244	373.187	373.185	1	spectra_filtered/specs_ms.mgf431	1		0	0	GJZJZRWFRZFTEE-ARJAWSKDSA-N	GJZJZRWFRZFTEE	Lipids and lipid-like molecules	Fatty Acyls	Fatty acyl glycosides	N/A	N/A	N/A
CCMSLIB00004678830	quercetin-3-O-pentoside	LC-ESI	qTof	Crude	NPLopes	faustocn	M-H	433.072	0	1			OC1=C(O)C=C(C2=C(OC3C(O)C(O)C(O)CO3)C(C4=C(O)C=C(O)C=C4O2)=O)C=C1	InChI=1S/C20H18O11/c21-8-4-11(24)14-13(5-8)30-18(7-1-2-9(22)10(23)3-7)19(16(14)27)31-20-17(28)15(26)12(25)6-29-20/h1-5,12,15,17,20-26,28H,6H2		3	Negative	UPDATE-SINGLE-ANNOTATED-BRONZE	Bronze	517	spectra_filtered/specs_ms.mgf	lib-00014.mgf	0.793433	GNPS-LIBRARY	396	0	12.2614	4	0.00531006	433.072	433.077	1	spectra_filtered/specs_ms.mgf517	1		9	258	PZZRDJXEMZMZFD-UHFFFAOYSA-N	PZZRDJXEMZMZFD	Phenylpropanoids and polyketides	Flavonoids	Flavonoid glycosides	Flavonols	Flavonols	Shikimates and Phenylpropanoids
CCMSLIB00005464084	MALATE	ESI	Orbitrap	Commercial	Dorrestein	Kelly Weldon	M-H	133.014	134.022	-1	636-61-3	N/A	O[C@H](CC(O)=O)C(O)=O	"InChI=1S/C4H6O5/c5-2(4(8)9)1-3(6)7/h2,5H,1H2,(H,6,7)(H,8,9)/t2-/m1/s1"	N/A	1	Negative	UPDATE-SINGLE-ANNOTATED-GOLD	Gold	52	spectra_filtered/specs_ms.mgf	lib-00016.mgf	0.545796	GNPS-MSMLS	272	0	5.27692	3	0.000701904	133.014	133.013	1	spectra_filtered/specs_ms.mgf52	1		0	0	BJEPYKJPYRNKOW-UWTATZPHSA-N	BJEPYKJPYRNKOW	Organic acids and derivatives	Hydroxy acids and derivatives	Beta hydroxy acids and derivatives	Dicarboxylic acids|Hydroxy fatty acids	Dicarboxylic acids|Hydroxy fatty acids	Fatty acids
CCMSLIB00004719373	epicatechin gallate	N/A	ESI-QTOF	isolated	MoNA	MoNA:VF-NPL-QTOF001656	[M-H]-	441.083	0	1	N/A	N/A	N/A	InChI=1S/C22H18O10/c2311614(25)12819(3222(30)10416(27)20(29)17(28)510)21(3118(12)711)91213(24)15(26)39/h17,19,21,2329H,8H2/t19,21/m1/s1	N/A	3	negative	UPDATE-SINGLE-ANNOTATED-BRONZE	Bronze	532	spectra_filtered/specs_ms.mgf	lib-00032.mgf	0.66948	MONA	645	0	2.90589	3	0.00128174	441.083	441.084	1	spectra_filtered/specs_ms.mgf532	1		0	0	N/A	N/A	N/A	N/A	N/A	N/A	N/A	N/A
CCMSLIB00000222486	ReSpect:PT209350 Quercetin-3-Rhamnoside|Quer-3-Rha|Quercitrin|thujin|Quercetrin|Quercimelin|Quercitroside|quercetin-3-O-rhamnoside|Quercetin- 3-(6-deoxy-alpha-L-mannopyranoside)|3,3',4',5,7-Pentahydroxyflavone-3-L-rha	ESI	LC-Q-TOF/MS	Isolated	Putative ReSpect Match	ReSpect	[M+H]	447.093	0	1	522-12-3	N/A	CC1C(C(C(C(O1)OC2=C(OC3=CC(=CC(=C3C2=O)O)O)C4=CC(=C(C=C4)O)O)O)O)O	1/C21H20O11/c1-7-15(26)17(28)18(29)21(30-7)32-20-16(27)14-12(25)5-9(22)6-13(14)31-19(20)8-2-3-10(23)11(24)4-8/h2-7,15,17-18,21-26,28-29H,1H3/t7-,15-,17+,18+,21-/m0/s1	N/A	3	Positive	UPDATE-SINGLE-ANNOTATED-BRONZE	Bronze	547	spectra_filtered/specs_ms.mgf	lib-00010.mgf	0.834417	RESPECT	317	0	2.93508	5	0.00131226	447.093	447.094	1	spectra_filtered/specs_ms.mgf547	1		0	0	OXGUCUVFOIWWQJ-UHFFFAOYSA-N	OXGUCUVFOIWWQJ	Phenylpropanoids and polyketides	Flavonoids	Flavonoid glycosides	Flavonols	Flavonols	Shikimates and Phenylpropanoids
CCMSLIB00005464084	MALATE	ESI	Orbitrap	Commercial	Dorrestein	Kelly Weldon	M-H	133.014	134.022	-1	636-61-3	N/A	O[C@H](CC(O)=O)C(O)=O	"InChI=1S/C4H6O5/c5-2(4(8)9)1-3(6)7/h2,5H,1H2,(H,6,7)(H,8,9)/t2-/m1/s1"	N/A	1	Negative	UPDATE-SINGLE-ANNOTATED-GOLD	Gold	55	spectra_filtered/specs_ms.mgf	lib-00016.mgf	0.566784	GNPS-MSMLS	172	0	3.09732	3	0.000411987	133.014	133.014	1	spectra_filtered/specs_ms.mgf55	1		0	0	BJEPYKJPYRNKOW-UWTATZPHSA-N	BJEPYKJPYRNKOW	Organic acids and derivatives	Hydroxy acids and derivatives	Beta hydroxy acids and derivatives	Dicarboxylic acids|Hydroxy fatty acids	Dicarboxylic acids|Hydroxy fatty acids	Fatty acids
CCMSLIB00004702014	epigallocatechin gallate	N/A	ESI-QFT	isolated	MoNA	MoNA:VF-NPL-QEHF010951	[M-H]-	457.078	0	1	N/A	N/A	N/A	InChI=1S/C22H18O11/c23-10-5-12(24)11-7-18(33-22(31)9-3-15(27)20(30)16(28)4-9)21(32-17(11)6-10)8-1-13(25)19(29)14(26)2-8/h1-6,18,21,23-30H,7H2/t18-,21-/m1/s1	N/A	3	negative	UPDATE-SINGLE-ANNOTATED-BRONZE	Bronze	564	spectra_filtered/specs_ms.mgf	lib-00032.mgf	0.905168	MONA	1360	0	0.867967	6	0.000396729	457.078	457.078	1	spectra_filtered/specs_ms.mgf564	1		0	0	WMBWREPUVVBILR-WIYYLYMNSA-N	WMBWREPUVVBILR	Phenylpropanoids and polyketides	Flavonoids	Flavans	N/A	N/A	N/A
CCMSLIB00003137313	Spectral Match to Threonic acid from NIST14	ESI	HCD	Isolated	Data from Kevin Bush	Data deposited by fevargas	M-H	135.03	0	1	3909124	N/A	N/A	N/A	N/A	3	Negative	UPDATE-SINGLE-ANNOTATED-BRONZE	Bronze	58	spectra_filtered/specs_ms.mgf	lib-00036.mgf	0.818368	GNPS-NIST14-MATCHES	302	0	7.34519	3	0.000991821	135.03	135.029	1	spectra_filtered/specs_ms.mgf58	1		0	0	N/A	N/A	N/A	N/A	N/A	N/A	N/A	N/A
CCMSLIB00004718491	hyperoside	N/A	ESI-QTOF	isolated	MoNA	MoNA:VF-NPL-QTOF000900	[M-H]-	463.088	0	1	N/A	N/A	N/A	InChI=1S/C21H20O12/c22-6-13-15(27)17(29)18(30)21(32-13)33-20-16(28)14-11(26)4-8(23)5-12(14)31-19(20)7-1-2-9(24)10(25)3-7/h1-5,13,15,17-18,21-27,29-30H,6H2/t13-,15+,17+,18-,21+/m1/s1	N/A	3	negative	UPDATE-SINGLE-ANNOTATED-BRONZE	Bronze	580	spectra_filtered/specs_ms.mgf	lib-00032.mgf	0.908168	MONA	3837	0	0.659002	8	0.000305176	463.088	463.088	1	spectra_filtered/specs_ms.mgf580	1		0	0	OVSQVDMCBVZWGM-DTGCRPNFSA-N	OVSQVDMCBVZWGM	Phenylpropanoids and polyketides	Flavonoids	Flavonoid glycosides	N/A	N/A	N/A
CCMSLIB00000845354	NCGC00169402-02!2-(3,4-dihydroxyphenyl)-5,7-dihydroxy-6-[3,4,5-trihydroxy-6-(hydroxymethyl)oxan-2-yl]chromen-4-one	LC-ESI	Maxis II HD Q-TOF Bruker	isolated	Jadhav/Dorrestein	lfnothias	M+Cl	483.07	448.101	1	n/a	n/a	OCC1OC(C(O)C(O)C1O)C2=C(O)C3=C(OC(=CC3=O)C4=CC(O)=C(O)C=C4)C=C2O	InChI=1S/C21H20O11/c22-6-14-17(27)19(29)20(30)21(32-14)16-11(26)5-13-15(18(16)28)10(25)4-12(31-13)7-1-2-8(23)9(24)3-7/h1-5,14,17,19-24,26-30H,6H2	N/A	1	negative	UPDATE-SINGLE-ANNOTATED-GOLD	Gold	648	spectra_filtered/specs_ms.mgf	lib-00025.mgf	0.619585	GNPS-NIH-NATURALPRODUCTSLIBRARY_ROUND2_NEGATIVE	575	0	10.3606	6	0.00500488	483.07	483.075	1	spectra_filtered/specs_ms.mgf648	1		40	700	ODBRNZZJSYPIDI-UHFFFAOYSA-N	ODBRNZZJSYPIDI	Phenylpropanoids and polyketides	Flavonoids	Flavonoid glycosides	Flavones	Flavones	Shikimates and Phenylpropanoids
CCMSLIB00000845354	NCGC00169402-02!2-(3,4-dihydroxyphenyl)-5,7-dihydroxy-6-[3,4,5-trihydroxy-6-(hydroxymethyl)oxan-2-yl]chromen-4-one	LC-ESI	Maxis II HD Q-TOF Bruker	isolated	Jadhav/Dorrestein	lfnothias	M+Cl	483.07	448.101	1	n/a	n/a	OCC1OC(C(O)C(O)C1O)C2=C(O)C3=C(OC(=CC3=O)C4=CC(O)=C(O)C=C4)C=C2O	InChI=1S/C21H20O11/c22-6-14-17(27)19(29)20(30)21(32-14)16-11(26)5-13-15(18(16)28)10(25)4-12(31-13)7-1-2-8(23)9(24)3-7/h1-5,14,17,19-24,26-30H,6H2	N/A	1	negative	UPDATE-SINGLE-ANNOTATED-GOLD	Gold	649	spectra_filtered/specs_ms.mgf	lib-00025.mgf	0.567228	GNPS-NIH-NATURALPRODUCTSLIBRARY_ROUND2_NEGATIVE	685	0	13.4561	7	0.00650024	483.07	483.077	1	spectra_filtered/specs_ms.mgf649	1		40	700	ODBRNZZJSYPIDI-UHFFFAOYSA-N	ODBRNZZJSYPIDI	Phenylpropanoids and polyketides	Flavonoids	Flavonoid glycosides	Flavones	Flavones	Shikimates and Phenylpropanoids
CCMSLIB00004696005	[3,4,5-trihydroxy-6-(3,4,5-trihydroxybenzoyl)oxyoxan-2-yl]methyl 3,4,5-trihydroxybenzoate	N/A	ESI-QFT	isolated	MoNA	MoNA:VF-NPL-QEHF004942	[M-H]-	483.078	0	1	N/A	N/A	N/A	InChI=1S/C20H20O14/c21-8-1-6(2-9(22)13(8)25)18(30)32-5-12-15(27)16(28)17(29)20(33-12)34-19(31)7-3-10(23)14(26)11(24)4-7/h1-4,12,15-17,20-29H,5H2	N/A	3	negative	UPDATE-SINGLE-ANNOTATED-BRONZE	Bronze	650	spectra_filtered/specs_ms.mgf	lib-00032.mgf	0.808499	MONA	1992	0	1.83202	12	0.00088501	483.078	483.079	1	spectra_filtered/specs_ms.mgf650	1		0	0	LYGRISUQIZNHGM-UHFFFAOYSA-N	LYGRISUQIZNHGM	N/A	N/A	N/A	N/A	N/A	N/A
CCMSLIB00004715985	13-hydroxy-7,14-dimethoxy-6-{[(2S,3R,4S,5S,6R)-3,4,5-trihydroxy-6-(hydroxymethyl)oxan-2-yl]oxy}-2,9-dioxatetracyclo[6.6.2.0?,・ｿｽ?.0・ｿｽ・ｿｽ,・ｿｽ?]hexadeca-1(15),4(16),5,7,11,13-hexaene-3,10-dione	N/A	ESI-QFT	isolated	MoNA	MoNA:VF-NPL-QEHF024922	[M-H]-	491.083	0	1	N/A	N/A	N/A	InChI=1S/C22H20O13/c1-30-16-8(24)3-6-11-12-7(21(29)34-18(11)16)4-9(17(31-2)19(12)35-20(6)28)32-22-15(27)14(26)13(25)10(5-23)33-22/h3-4,10,13-15,22-27H,5H2,1-2H3/t10-,13-,14+,15-,22-/m1/s1	N/A	3	negative	UPDATE-SINGLE-ANNOTATED-BRONZE	Bronze	674	spectra_filtered/specs_ms.mgf	lib-00032.mgf	0.788934	MONA	737	0	0.621434	3	0.000305176	491.083	491.083	1	spectra_filtered/specs_ms.mgf674	1		0	0	PNYQFRZBMVRYFC-CGWYSGAGSA-N	PNYQFRZBMVRYFC	Phenylpropanoids and polyketides	Tannins	Hydrolyzable tannins	N/A	N/A	N/A
CCMSLIB00004715985	13-hydroxy-7,14-dimethoxy-6-{[(2S,3R,4S,5S,6R)-3,4,5-trihydroxy-6-(hydroxymethyl)oxan-2-yl]oxy}-2,9-dioxatetracyclo[6.6.2.0?,・ｿｽ?.0・ｿｽ・ｿｽ,・ｿｽ?]hexadeca-1(15),4(16),5,7,11,13-hexaene-3,10-dione	N/A	ESI-QFT	isolated	MoNA	MoNA:VF-NPL-QEHF024922	[M-H]-	491.083	0	1	N/A	N/A	N/A	InChI=1S/C22H20O13/c1-30-16-8(24)3-6-11-12-7(21(29)34-18(11)16)4-9(17(31-2)19(12)35-20(6)28)32-22-15(27)14(26)13(25)10(5-23)33-22/h3-4,10,13-15,22-27H,5H2,1-2H3/t10-,13-,14+,15-,22-/m1/s1	N/A	3	negative	UPDATE-SINGLE-ANNOTATED-BRONZE	Bronze	675	spectra_filtered/specs_ms.mgf	lib-00032.mgf	0.569364	MONA	314	0	17.2759	4	0.00848389	491.083	491.091	1	spectra_filtered/specs_ms.mgf675	1		0	0	PNYQFRZBMVRYFC-CGWYSGAGSA-N	PNYQFRZBMVRYFC	Phenylpropanoids and polyketides	Tannins	Hydrolyzable tannins	N/A	N/A	N/A
CCMSLIB00000222117	ReSpect:PT204340 Quercetin-3-O-glucose-6''-acetate|Quer-3-Glc-6pp-acetate|quercetin-3-O-beta-D-glucopyranosyl-6''-acetate|quercetin 3-(6''-acetylglucoside)	ESI	LC-Q-TOF/MS	Isolated	Putative ReSpect Match	ReSpect	[M+H]	505.098	0	1	54542-51-7	N/A	c	N/A	N/A	3	Positive	UPDATE-SINGLE-ANNOTATED-BRONZE	Bronze	713	spectra_filtered/specs_ms.mgf	lib-00010.mgf	0.746802	RESPECT	555	0	1.20838	5	0.000610352	505.098	505.099	1	spectra_filtered/specs_ms.mgf713	1		2	24	N/A	N/A	N/A	N/A	N/A	N/A	N/A	N/A
CCMSLIB00000850977	NCGC00380554-01_C22H38O10_2-(4-Methyl-3-cyclohexen-1-yl)-2-propanyl 6-O-(6-deoxy-alpha-L-mannopyranosyl)-beta-D-glucopyranoside	LC-ESI	Maxis II HD Q-TOF Bruker	isolated	Jadhav/Dorrestein	lfnothias	M+FA-H	507.245	462.246	1	n/a	n/a	C[C@@H]1O[C@@H](OC[C@H]2O[C@@H](OC(C)(C)C3CC\C(=C/C3)C)[C@H](O)[C@@H](O)[C@@H]2O)[C@H](O)[C@H](O)[C@H]1O	InChI=1S/C22H38O10/c1-10-5-7-12(8-6-10)22(3,4)32-21-19(28)17(26)15(24)13(31-21)9-29-20-18(27)16(25)14(23)11(2)30-20/h5,11-21,23-28H,6-9H2,1-4H3/t11-,12?,13+,14-,15+,16+,17-,18+,19+,20+,21-/m0/s1	N/A	1	negative	UPDATE-SINGLE-ANNOTATED-GOLD	Gold	718	spectra_filtered/specs_ms.mgf	lib-00025.mgf	0.536159	GNPS-NIH-NATURALPRODUCTSLIBRARY_ROUND2_NEGATIVE	141	0	2.76752	3	0.00140381	507.245	507.246	1	spectra_filtered/specs_ms.mgf718	1		0	0	JIDXOGPQCVBGSC-BXUICYMCSA-N	JIDXOGPQCVBGSC	Organic oxygen compounds	Organooxygen compounds	Carbohydrates and carbohydrate conjugates	Menthane monoterpenoids|Monocyclic monoterpenoids	Menthane monoterpenoids|Monocyclic monoterpenoids	Terpenoids
CCMSLIB00004683262	Hexadecanoyl-hydroxy-sn-glycerophosphocholine (PUT) - 39.0128eV	LC-ESI	impact HD	Isolated	Sumner	Sumner	M-H	540.326	0	1	N/A	N/A	N/A	N/A	N/A	3	Negative	UPDATE-SINGLE-ANNOTATED-BRONZE	Bronze	788	spectra_filtered/specs_ms.mgf	lib-00033.mgf	0.768964	SUMNER	354	0	13.5552	3	0.00732422	540.326	540.333	1	spectra_filtered/specs_ms.mgf788	1		0	0	N/A	N/A	N/A	N/A	N/A	N/A	N/A	N/A
CCMSLIB00004691741	2-hydroxycinnamic acid	N/A	ESI-QFT	isolated	MoNA	MoNA:VF-NPL-QEHF000678	[M-H]-	163.04	0	1	N/A	N/A	N/A	InChI=1S/C9H8O3/c10-8-4-2-1-3-7(8)5-6-9(11)12/h1-6,10H,(H,11,12)/b6-5+	N/A	3	negative	UPDATE-SINGLE-ANNOTATED-BRONZE	Bronze	82	spectra_filtered/specs_ms.mgf	lib-00032.mgf	0.982687	MONA	1099	0	4.86664	3	0.000793457	163.04	163.039	1	spectra_filtered/specs_ms.mgf82	1		0	0	PMOWTIHVNWZYFI-AATRIKPKSA-N	PMOWTIHVNWZYFI	Phenylpropanoids and polyketides	Cinnamic acids and derivatives	Hydroxycinnamic acids and derivatives	N/A	N/A	N/A
CCMSLIB00000850535	NCGC00380867-01_C27H46O9_9,12,15-Octadecatrienoic acid, 3-(hexopyranosyloxy)-2-hydroxypropyl ester, (9Z,12Z,15Z)-	LC-ESI	Maxis II HD Q-TOF Bruker	isolated	Jadhav/Dorrestein	lfnothias	M+FA-H	559.312	514.314	1	n/a	n/a	CC\C=C/C/C=C\C\C=C/CCCCCCCC(=O)OCC(O)COC1OC(CO)C(O)C(O)C1O	InChI=1S/C27H46O9/c1-2-3-4-5-6-7-8-9-10-11-12-13-14-15-16-17-23(30)34-19-21(29)20-35-27-26(33)25(32)24(31)22(18-28)36-27/h3-4,6-7,9-10,21-22,24-29,31-33H,2,5,8,11-20H2,1H3/b4-3-,7-6-,10-9-	N/A	1	negative	UPDATE-SINGLE-ANNOTATED-GOLD	Gold	825	spectra_filtered/specs_ms.mgf	lib-00025.mgf	0.789	GNPS-NIH-NATURALPRODUCTSLIBRARY_ROUND2_NEGATIVE	522	0	0.654752	5	0.000366211	559.312	559.312	1	spectra_filtered/specs_ms.mgf825	1		53	1945	HUSISCNTLUEZCN-PDBXOOCHSA-N	HUSISCNTLUEZCN	Lipids and lipid-like molecules	Glycerolipids	Glycosylglycerols	Glycosyldiacylglycerols	Glycosyldiacylglycerols	Fatty acids
CCMSLIB00000850535	NCGC00380867-01_C27H46O9_9,12,15-Octadecatrienoic acid, 3-(hexopyranosyloxy)-2-hydroxypropyl ester, (9Z,12Z,15Z)-	LC-ESI	Maxis II HD Q-TOF Bruker	isolated	Jadhav/Dorrestein	lfnothias	M+FA-H	559.312	514.314	1	n/a	n/a	CC\C=C/C/C=C\C\C=C/CCCCCCCC(=O)OCC(O)COC1OC(CO)C(O)C(O)C1O	InChI=1S/C27H46O9/c1-2-3-4-5-6-7-8-9-10-11-12-13-14-15-16-17-23(30)34-19-21(29)20-35-27-26(33)25(32)24(31)22(18-28)36-27/h3-4,6-7,9-10,21-22,24-29,31-33H,2,5,8,11-20H2,1H3/b4-3-,7-6-,10-9-	N/A	1	negative	UPDATE-SINGLE-ANNOTATED-GOLD	Gold	826	spectra_filtered/specs_ms.mgf	lib-00025.mgf	0.797777	GNPS-NIH-NATURALPRODUCTSLIBRARY_ROUND2_NEGATIVE	348	0	6.54752	3	0.00366211	559.312	559.316	1	spectra_filtered/specs_ms.mgf826	1		53	1945	HUSISCNTLUEZCN-PDBXOOCHSA-N	HUSISCNTLUEZCN	Lipids and lipid-like molecules	Glycerolipids	Glycosylglycerols	Glycosyldiacylglycerols	Glycosyldiacylglycerols	Fatty acids
CCMSLIB00004691739	2-hydroxycinnamic acid	N/A	ESI-QFT	isolated	MoNA	MoNA:VF-NPL-QEHF000676	[M-H]-	163.04	0	1	N/A	N/A	N/A	InChI=1S/C9H8O3/c10-8-4-2-1-3-7(8)5-6-9(11)12/h1-6,10H,(H,11,12)/b6-5+	N/A	3	negative	UPDATE-SINGLE-ANNOTATED-BRONZE	Bronze	83	spectra_filtered/specs_ms.mgf	lib-00032.mgf	0.96892	MONA	234	0	4.86664	3	0.000793457	163.04	163.039	1	spectra_filtered/specs_ms.mgf83	1		0	0	PMOWTIHVNWZYFI-AATRIKPKSA-N	PMOWTIHVNWZYFI	Phenylpropanoids and polyketides	Cinnamic acids and derivatives	Hydroxycinnamic acids and derivatives	N/A	N/A	N/A
CCMSLIB00003138076	Spectral Match to Uridine 5'-diphosphogalactose from NIST14	ESI	HCD	Isolated	Data from Katrina Waters;Yoshihiro Kawaoka;Richard Smith;Thomas Metz	Data deposited by alchemistmatt	M-H	565.05	0	1	2956163	N/A	N/A	N/A	N/A	3	Negative	UPDATE-SINGLE-ANNOTATED-BRONZE	Bronze	831	spectra_filtered/specs_ms.mgf	lib-00036.mgf	0.768422	GNPS-NIST14-MATCHES	540	0	6.48104	3	0.00366211	565.05	565.046	1	spectra_filtered/specs_ms.mgf831	1		4	79	N/A	N/A	N/A	N/A	N/A	N/A	N/A	N/A
CCMSLIB00000849959	NCGC00380475-01_C26H34O11_beta-D-Glucopyranoside, [(2R,3R)-2,3-dihydro-2-(4-hydroxy-3-methoxyphenyl)-5-(3-hydroxypropyl)-7-methoxy-3-benzofuranyl]methyl	LC-ESI	Maxis II HD Q-TOF Bruker	isolated	Jadhav/Dorrestein	lfnothias	M+FA-H	567.208	522.21	1	n/a	n/a	COC1=C(O)C=CC(=C1)[C@@H]2OC3=C(C=C(CCCO)C=C3OC)[C@@H]2CO[C@@H]4O[C@H](CO)[C@@H](O)[C@H](O)[C@H]4O	InChI=1S/C26H34O11/c1-33-18-10-14(5-6-17(18)29)24-16(12-35-26-23(32)22(31)21(30)20(11-28)36-26)15-8-13(4-3-7-27)9-19(34-2)25(15)37-24/h5-6,8-10,16,20-24,26-32H,3-4,7,11-12H2,1-2H3/t16-,20+,21+,22-,23+,24-,26+/m0/s1	N/A	1	negative	UPDATE-SINGLE-ANNOTATED-GOLD	Gold	852	spectra_filtered/specs_ms.mgf	lib-00025.mgf	0.535536	GNPS-NIH-NATURALPRODUCTSLIBRARY_ROUND2_NEGATIVE	767	0	11.0834	6	0.00628662	567.208	567.202	1	spectra_filtered/specs_ms.mgf852	1		1	7	VTKHRLZMWODHJA-QMYUBYRNSA-N	VTKHRLZMWODHJA	N/A	N/A	N/A	Neolignans	Neolignans	Shikimates and Phenylpropanoids
CCMSLIB00004684087	Procyanidin B1 - 30eV	LC-ESI	impact HD	Isolated	Sumner	Sumner	M-H	577.136	0	1	20315-25-7	N/A	c1cc(c(cc1[C@@H]2[C@H](Cc3c(cc(c(c3O2)[C@H]4c5c(cc(cc5O[C@@H]([C@@H]4O)c6ccc(c(c6)O)O)O)O)O)O)O)O)O	InChI=1S/C30H26O12/c31-13-7-20(37)24-23(8-13)41-29(12-2-4-16(33)19(36)6-12)27(40)26(24)25-21(38)10-17(34)14-9-22(39)28(42-30(14)25)11-1-3-15(32)18(35)5-11/h1-8,10,22,26-29,31-40H,9H2/t22-,26+,27+,28+,29+/m0/s1	N/A	3	Negative	UPDATE-SINGLE-ANNOTATED-BRONZE	Bronze	858	spectra_filtered/specs_ms.mgf	lib-00033.mgf	0.529612	SUMNER	530	0	0.740287	8	0.000427246	577.136	577.136	1	spectra_filtered/specs_ms.mgf858	1		0	0	XFZJEEAOWLFHDH-UKWJTHFESA-N	XFZJEEAOWLFHDH	Phenylpropanoids and polyketides	Flavonoids	Biflavonoids and polyflavonoids	Proanthocyanins	Proanthocyanins	Shikimates and Phenylpropanoids
CCMSLIB00004684085	Procyanidin B1 - 40eV	LC-ESI	impact HD	Isolated	Sumner	Sumner	M-H	577.14	0	1	20315-25-7	N/A	c1cc(c(cc1[C@@H]2[C@H](Cc3c(cc(c(c3O2)[C@H]4c5c(cc(cc5O[C@@H]([C@@H]4O)c6ccc(c(c6)O)O)O)O)O)O)O)O)O	InChI=1S/C30H26O12/c31-13-7-20(37)24-23(8-13)41-29(12-2-4-16(33)19(36)6-12)27(40)26(24)25-21(38)10-17(34)14-9-22(39)28(42-30(14)25)11-1-3-15(32)18(35)5-11/h1-8,10,22,26-29,31-40H,9H2/t22-,26+,27+,28+,29+/m0/s1	N/A	3	Negative	UPDATE-SINGLE-ANNOTATED-BRONZE	Bronze	859	spectra_filtered/specs_ms.mgf	lib-00033.mgf	0.686911	SUMNER	339	0	4.6532	7	0.00268555	577.14	577.137	1	spectra_filtered/specs_ms.mgf859	1		0	0	XFZJEEAOWLFHDH-UKWJTHFESA-N	XFZJEEAOWLFHDH	Phenylpropanoids and polyketides	Flavonoids	Biflavonoids and polyflavonoids	Proanthocyanins	Proanthocyanins	Shikimates and Phenylpropanoids
CCMSLIB00000222411	ReSpect:PT208723 Tiliroside|Kaem-3-Glc-6pp-p-Cou|Kaempferol-3-Glucoside-6-p-coumaroyl|Tribuloside|kaempferol-3-O-(6-p-coumaroyl)-glucoside|Potengriffioside A|[(2R,3S,4S,5R,6S)-6-[5,7-dihydroxy-2-(4-hydroxyphenyl)-4-ox	ESI	LC-Q-TOF/MS	Isolated	Putative ReSpect Match	ReSpect	[M+H]	593.13	0	1	20316-62-5	N/A	C1=CC(=CC=C1C=CC(=O)OCC2C(C(C(C(O2)OC3=C(OC4=CC(=CC(=C4C3=O)O)O)C5=CC=C(C=C5)O)O)O)O)O	1/C30H26O13/c31-16-6-1-14(2-7-16)3-10-22(35)40-13-21-24(36)26(38)27(39)30(42-21)43-29-25(37)23-19(34)11-18(33)12-20(23)41-28(29)15-4-8-17(32)9-5-15/h1-12,21,24,26-27,30-34,36,38-39H,13H2/b10-3+/t21-,24-,26+,27-,30+/m1/s1	N/A	3	Positive	UPDATE-SINGLE-ANNOTATED-BRONZE	Bronze	881	spectra_filtered/specs_ms.mgf	lib-00010.mgf	0.712721	RESPECT	183	0	3.49872	3	0.0020752	593.13	593.132	1	spectra_filtered/specs_ms.mgf881	1		0	0	DVGGLGXQSFURLP-UHFFFAOYSA-N	DVGGLGXQSFURLP	Phenylpropanoids and polyketides	Flavonoids	Flavonoid glycosides	Flavonols	Flavonols	Shikimates and Phenylpropanoids
CCMSLIB00004683585	Kaempferol-3-O-rutinoside - 40eV	LC-ESI	impact HD	Isolated	Sumner	Sumner	M-H	593.152	0	1	17650-84-9	N/A	C[C@H]1[C@@H]([C@H]([C@H]([C@@H](O1)OC[C@@H]2[C@H]([C@@H]([C@H]([C@@H](O2)Oc3c(=O)c4c(cc(cc4oc3c5ccc(cc5)O)O)O)O)O)O)O)O)O	InChI=1S/C27H30O15/c1-9-17(31)20(34)22(36)26(39-9)38-8-15-18(32)21(35)23(37)27(41-15)42-25-19(33)16-13(30)6-12(29)7-14(16)40-24(25)10-2-4-11(28)5-3-10/h2-7,9,15,17-18,20-23,26-32,34-37H,8H2,1H3/t9-,15+,17-,18+,20+,21-,22+,23+,26+,27-/m0/s1	N/A	3	Negative	UPDATE-SINGLE-ANNOTATED-BRONZE	Bronze	883	spectra_filtered/specs_ms.mgf	lib-00033.mgf	0.90846	SUMNER	1446	0	1.95509	4	0.00115967	593.152	593.151	1	spectra_filtered/specs_ms.mgf883	1		0	0	RTATXGUCZHCSNG-QHWHWDPRSA-N	RTATXGUCZHCSNG	Phenylpropanoids and polyketides	Flavonoids	Flavonoid glycosides	Flavonols	Flavonols	Shikimates and Phenylpropanoids
CCMSLIB00004691622	Gallic acid	N/A	ESI-QFT	isolated	MoNA	MoNA:VF-NPL-QEHF000559	[M-H]-	169.014	0	1	N/A	N/A	N/A	InChI=1S/C7H6O5/c8-4-1-3(7(11)12)2-5(9)6(4)10/h1-2,8-10H,(H,11,12)	N/A	3	negative	UPDATE-SINGLE-ANNOTATED-BRONZE	Bronze	91	spectra_filtered/specs_ms.mgf	lib-00032.mgf	0.966656	MONA	1848	0	0.631968	4	0.000106812	169.014	169.014	1	spectra_filtered/specs_ms.mgf91	1		3	50	LNTHITQWFMADLM-UHFFFAOYSA-N	LNTHITQWFMADLM	Benzenoids	Benzene and substituted derivatives	Benzoic acids and derivatives	N/A	N/A	N/A
CCMSLIB00004683572	Diosmin - 20eV	LC-ESI	impact HD	Isolated	Sumner	Sumner	M-H	607.166	0	1	520-27-4	N/A	C[C@H]1[C@@H]([C@H]([C@H]([C@@H](O1)OC[C@@H]2[C@H]([C@@H]([C@H]([C@@H](O2)Oc3cc(c4c(=O)cc(oc4c3)c5ccc(c(c5)O)OC)O)O)O)O)O)O)O	InChI=1S/C28H32O15/c1-10-21(32)23(34)25(36)27(40-10)39-9-19-22(33)24(35)26(37)28(43-19)41-12-6-14(30)20-15(31)8-17(42-18(20)7-12)11-3-4-16(38-2)13(29)5-11/h3-8,10,19,21-30,32-37H,9H2,1-2H3/t10-,19+,21-,22+,23+,24-,25+,26+,27+,28+/m0/s1	N/A	3	Negative	UPDATE-SINGLE-ANNOTATED-BRONZE	Bronze	912	spectra_filtered/specs_ms.mgf	lib-00033.mgf	0.860006	SUMNER	372	0	29.5543	3	0.0179443	607.166	607.148	1	spectra_filtered/specs_ms.mgf912	1		0	0	GZSOSUNBTXMUFQ-YFAPSIMESA-N	GZSOSUNBTXMUFQ	Phenylpropanoids and polyketides	Flavonoids	Flavonoid glycosides	Flavones	Flavones	Shikimates and Phenylpropanoids
CCMSLIB00004716513	Shikimic Acid	N/A	ESI-QFT	isolated	MoNA	MoNA:VF-NPL-QEHF025450	[M-H]-	173.046	0	1	N/A	N/A	N/A	InChI=1S/C7H10O5/c8-4-1-3(7(11)12)2-5(9)6(4)10/h1,4-6,8-10H,2H2,(H,11,12)/t4-,5-,6-/m1/s1	N/A	3	negative	UPDATE-SINGLE-ANNOTATED-BRONZE	Bronze	92	spectra_filtered/specs_ms.mgf	lib-00032.mgf	0.507877	MONA	215	0	8.72959	3	0.00151062	173.046	173.044	1	spectra_filtered/specs_ms.mgf92	1		0	0	JXOHGGNKMLTUBP-HSUXUTPPSA-N	JXOHGGNKMLTUBP	Organic oxygen compounds	Organooxygen compounds	Alcohols and polyols	N/A	N/A	N/A
CCMSLIB00000221741	ReSpect:PT200150 (-)Shikimic acid|shikimate|3,4,5-Trihydroxy-1-cyclohexene-1-carboxylic acid|(3R,4S,5R)-(?)-3,4,5-Trihydroxy-1-cyclohexenecarboxylic acid|(3R,4S,5R)-3,4,5-trihydroxycyclohexene-1-carboxylic acid	ESI	LC-Q-TOF/MS	Isolated	Putative ReSpect Match	ReSpect	[M+H]	173.045	0	1	138-59-0	N/A	C1C(C(C(C=C1C(=O)O)O)O)O	1/C7H10O5/c8-4-1-3(7(11)12)2-5(9)6(4)10/h1,4-6,8-10H,2H2,(H,11,12)/t4-,5-,6-/m1/s1/f/h11H	N/A	3	Positive	UPDATE-SINGLE-ANNOTATED-BRONZE	Bronze	93	spectra_filtered/specs_ms.mgf	lib-00010.mgf	0.8307	RESPECT	412	0	1.14632	5	0.000198364	173.045	173.045	1	spectra_filtered/specs_ms.mgf93	1		1	36	JXOHGGNKMLTUBP-UHFFFAOYSA-N	JXOHGGNKMLTUBP	Organic oxygen compounds	Organooxygen compounds	Alcohols and polyols	Simple phenolic acids	Simple phenolic acids	Shikimates and Phenylpropanoids
CCMSLIB00004719963	Rutin	N/A	ESI-QTOF	isolated	MoNA	MoNA:VF-NPL-QTOF002159	[M-H]-	609.146	0	1	N/A	N/A	N/A	InChI=1S/C27H30O16/c1-8-17(32)20(35)22(37)26(40-8)39-7-15-18(33)21(36)23(38)27(42-15)43-25-19(34)16-13(31)5-10(28)6-14(16)41-24(25)9-2-3-11(29)12(30)4-9/h2-6,8,15,17-18,20-23,26-33,35-38H,7H2,1H3/t8-,15+,17-,18+,20+,21-,22+,23+,26+,27-/m0/s1	N/A	3	negative	UPDATE-SINGLE-ANNOTATED-BRONZE	Bronze	932	spectra_filtered/specs_ms.mgf	lib-00032.mgf	0.953811	MONA	5447	0	1.30257	8	0.000793457	609.146	609.147	1	spectra_filtered/specs_ms.mgf932	1		4	53	IKGXIBQEEMLURG-NVPNHPEKSA-N	IKGXIBQEEMLURG	Phenylpropanoids and polyketides	Flavonoids	Flavonoid glycosides	N/A	N/A	N/A
CCMSLIB00004701196	(1R,21S,23R)-6,7,8,11,12,13,22,23-octahydroxy-3,16-dioxo-2,17,20-trioxatetracyclo[17.3.1.0?,?.0・ｿｽ?,・ｿｽ?]tricosa-4(9),5,7,10(15),11,13-hexaen-21-yl 3,4,5-trihydroxybenzoate	N/A	ESI-QFT	isolated	MoNA	MoNA:VF-NPL-QEHF010133	[M-H]-	633.073	0	1	N/A	N/A	N/A	InChI=1S/C27H22O18/c28-9-1-6(2-10(29)16(9)32)24(39)45-27-22(38)23-19(35)13(43-27)5-42-25(40)7-3-11(30)17(33)20(36)14(7)15-8(26(41)44-23)4-12(31)18(34)21(15)37/h1-4,13,19,22-23,27-38H,5H2/t13?,19-,22?,23-,27+/m1/s1	N/A	3	negative	UPDATE-SINGLE-ANNOTATED-BRONZE	Bronze	983	spectra_filtered/specs_ms.mgf	lib-00032.mgf	0.613974	MONA	382	0	5.20619	4	0.0032959	633.073	633.07	1	spectra_filtered/specs_ms.mgf983	1		0	0	TUSDEZXZIZRFGC-ZHQJDPFESA-N	TUSDEZXZIZRFGC	Phenylpropanoids and polyketides	Tannins	Hydrolyzable tannins	N/A	N/A	N/A
CCMSLIB00000847065	NCGC00384822-01![(2R,3S,4S,5R,6S)-3,4-dihydroxy-5,6-bis[(3,4,5-trihydroxybenzoyl)oxy]oxan-2-yl]methyl 3,4,5-trihydroxybenzoate	LC-ESI	Maxis II HD Q-TOF Bruker	isolated	Jadhav/Dorrestein	lfnothias	M-H	635.089	636.096	1	n/a	n/a	O[C@@H]1[C@@H](COC(=O)C2=CC(O)=C(O)C(O)=C2)O[C@@H](OC(=O)C3=CC(O)=C(O)C(O)=C3)[C@H](OC(=O)C4=CC(O)=C(O)C(O)=C4)[C@H]1O	InChI=1S/C27H24O18/c28-11-1-8(2-12(29)18(11)34)24(39)42-7-17-21(37)22(38)23(44-25(40)9-3-13(30)19(35)14(31)4-9)27(43-17)45-26(41)10-5-15(32)20(36)16(33)6-10/h1-6,17,21-23,27-38H,7H2/t17-,21-,22+,23-,27+/m1/s1	N/A	1	negative	UPDATE-SINGLE-ANNOTATED-GOLD	Gold	989	spectra_filtered/specs_ms.mgf	lib-00025.mgf	0.706268	GNPS-NIH-NATURALPRODUCTSLIBRARY_ROUND2_NEGATIVE	1241	0	25.1795	6	0.0159912	635.089	635.105	1	spectra_filtered/specs_ms.mgf989	1		1	1	LLENXGNWVNSBQG-VFTFQOQOSA-N	LLENXGNWVNSBQG	N/A	N/A	N/A	Gallotannins	Gallotannins	Shikimates and Phenylpropanoids
