# Supplementary material for: Gene-Metabolite Network Analysis Revealed Tissue-Specific Accumulation of Therapeutic Metabolites in Mallotus japonicus
Source: Int J Mol Sci. 2021 Aug 17;22(16):8835. doi: 10.3390/ijms22168835 (PMC8396295; doi:10.3390/ijms22168835)
Supplement: Supplementary file 1 [file ijms-22-08835-s001.zip › Supplementary_Table S4_MS2_validated_metabolites with legend_Megha.xlsx]

## Sheet: Sheet1
Table S4: MS/MS fragmentation pattern of MS2 confirmed 69 metabolites.
					Young Leaf (YL)						Mature Leaf (ML)						Young Stem (YS)						Mature Stem (MS)						Bark (BK)						Central Cylinder (CC)						Inflorescence (INF)
Metabolite_ID	Compound name	MS/MS Spectrum	m/z Value	Retention Time	YL_Biological_replicate1	YL_Biological_replicate2	YL_Biological_replicate3	YL_Biological_replicate4	YL_Biological_replicate5	Average_YL	ML_Biological_replicate1	ML_Biological_replicate2	ML_Biological_replicate3	ML_Biological_replicate4	ML_Biological_replicate5	Average_ML	YS_Biological_replicate1	YS_Biological_replicate2	YS_Biological_replicate3	YS_Biological_replicate4	YS_Biological_replicate5	Average_YS	MS_Biological_replicate1	MS_Biological_replicate2	MS_Biological_replicate3	MS_Biological_replicate4	MS_Biological_replicate5	Average_MS	BK_Biological_replicate1	BK_Biological_replicate2	BK_Biological_replicate3	BK_Biological_replicate4	BK_Biological_replicate5	Average_BK	CC_Biological_replicate1	CC_Biological_replicate2	CC_Biological_replicate3	CC_Biological_replicate4	CC_Biological_replicate5	Average_CC	INF_Biological_replicate1	INF_Biological_replicate2	INF_Biological_replicate3	INF_Biological_replicate4	INF_Biological_replicate5	Average_INF
Metabolite_361	Nicotinic acid	121.78343:16 123.05598:121 124.04073:143	124.04	1.41	4195	3518	4295	3693	3620	3864.2	1517	1389	1358	1411	1410	1417	3021	3473	3166	2996	3062	3143.6	819	782	744	828	704	775.4	283	349	230	303	269	286.8	293	286	311	236	216	268.4	1189	747	965	1119	1121	1028.2
Metabolite_381	1,3,5-Benzenetriol	69.03157:33 81.0316:67 109.02915:16 127.0415:53	127.04	1.92	3813	4143	3717	4461	4201	4067	5706	4753	5894	5376	5597	5465.2	1494	1306	1508	1972	1222	1500.4	909	1057	853	1003	835	931.4	699	798	740	752	775	752.8	559	433	501	418	556	493.4	2136	2120	2229	2296	3010	2358.2
Metabolite_480	chromene	133.05606:20 133.06615:47	133.065	3.07	306	372	342	280	249	309.8	360	341	388	309	288	337.2	223	253	239	254	215	236.8	294	277	289	286	230	275.2	205	224	300	257	218	240.8	171	135	126	148	108	137.6	1534	1896	1493	1298	1754	1595
Metabolite_491	Mallorepine	80.04769:25 92.04639:75 94.03268:16 118.93891:19 119.05072:22 133.10504:16 135.03127:24 135.05515:2143	135.056	1.89	29776	33045	31969	30589	29203	30916.4	29571	29292	28481	30085	29724	29430.6	34689	35961	34654	35732	32264	34660	20009	20849	10018	20288	9841	16201	32862	33178	16028	37333	32686	30417.4	1639	1172	1178	2156	1084	1445.8	10298	9257	10544	10073	6370	9308.4
Metabolite_779	Malloapeltine	77.02538:16 78.02986:38 78.661:16 78.9704:27 79.01622:20 79.0463:16 81.03252:24 82.02544:52 82.78362:26 91.02419:48 92.0371:17 93.01557:16 94.02874:17 97.02866:17 98.95707:16 104.03213:16 104.03854:22 105.04452:255 106.05202:914 107.0015:25 107.05659:45 110.02065:19 119.02369:17 120.03941:25 123.05109:16 123.82413:16 124.01704:18 124.03469:72 124.04097:134 133.0399:35 134.0463:1232 134.55995:39 1…	151.052	2.23	172004	174347	176245	161504	144670	165754	127054	124595	115339	125501	120940	122686	240204	261146	240532	258230	231973	246417	7670	7042	6445	7173	6961	7058.2	2534	2017	1831	2543	1854	2155.8	1322	241	227	589	295	534.8	5282	3511	5228	4832	5985	4967.6
Metabolite_1044	galic acid	58.06369:30 60.0816:54 69.02983:16 69.07072:24 89.94293:17 97.05485:25 108.01778:20 125.02498:16 127.04533:35 153.01892:78 155.95883:22	171.031	2.05	13300	10853	970	9452	8869	8688.8	8999	2639	880	8456	7725	5739.8	17215	18813	16931	21211	15956	18025.2	1272	1302	1115	858	1422	1193.8	814	877	786	739	626	768.4	387	311	318	252	416	336.8	6459	5513	3913	4002	10926	6162.6
Metabolite_1286	Methyl gallate	123.04384:41 126.02672:17 153.02074:113	185.046	3.3	1862	1384	1735	1322	2451	1750.8	1458	1039	1162	1079	1783	1304.2	545	403	690	913	656	641.4	408	632	337	441	378	439.2	185	399	272	449	378	336.6	250	237	270	212	232	240.2	518	725	188	298	298	405.4
Metabolite_1423	Isoscopoletin	68.0683:20 85.02328:17 85.02905:17 106.04443:16 109.02566:19 147.04895:17 152.96167:18 153.01743:41 177.06026:17 193.04712:517 193.08275:17 193.11124:16	193.051	3.6	573	677	581	665	706	640.4	752	664	742	702	640	700	299	396	360	420	296	354.2	362	313	310	228	215	285.6	344	269	469	457	326	373	192	131	181	126	139	153.8	12731	8474	7562	9636	10646	9809.8
Metabolite_1425	Scopoletin	155.10779:30 175.03505:20 193.04948:16	193.05	10.88	1743	1217	990	1117	1961	1405.6	1396	1087	747	1346	1447	1204.6	278	778	1563	401	553	714.6	1150	1173	547	707	631	841.6	492	168	153	1621	190	524.8	135	96	184	118	91	124.8	7100	8247	6816	7121	6616	7180
Metabolite_1478	(E)-Ferulic acid	89.03614:31 162.02536:19 177.04903:40 178.90544:62	195.066	4.32	1134	1205	988	975	1095	1079.4	1264	982	973	1080	1002	1060.2	285	386	244	477	339	346.2	252	292	246	201	220	242.2	194	218	255	189	176	206.4	116	70	86	71	146	97.8	208	181	142	205	236	194.4
Metabolite_1504	2,6-Dihydroxy-3-methyl-4-methoxyacetophenone	134.07715:21 153.05614:26 155.07629:17 179.07002:51 179.08067:35 197.09:358	197.082	9.97	212	495	461	321	422	382.2	689	399	602	528	701	583.8	125	133	136	100	113	121.4	113	109	109	144	139	122.8	59	81	85	129	136	98	114	83	84	68	93	88.4	2978	4107	1434	1487	1032	2207.6
Metabolite_1505	Phloroisobutyrophenone	96.95902:16 105.06883:32 108.62044:20 116.92865:21 137.96355:22 154.98615:28 155.06895:42 157.9967:33 176.14587:18 179.06987:21 182.08099:18 197.07021:36 197.08182:232	197.082	6.94	180	383	295	309	275	288.4	251	213	224	339	303	266	167	148	425	126	130	199.2	137	443	135	243	295	250.6	84	242	98	336	263	204.6	224	120	127	121	119	142.2	1822	2366	829	1112	1038	1433.4
Metabolite_1773	Mallophenone	67.05257:20 105.07043:23 105.07712:16 107.08344:17 135.07358:42 161.06293:22 169.08588:36 177.0537:18 178.06253:21 193.08766:175 211.09523:411	211.099	7.27	363	301	252	340	407	332.6	248	207	158	241	182	207.2	83	83	91	86	90	86.6	97	132	92	78	114	102.6	82	70	89	251	99	118.2	89	140	82	60	82	90.6	10073	10717	9070	10062	9863	9957
Metabolite_1942	2,3-Dihydro-5,7-dihydroxy-2,6,8-trimethyl-4H1-benzopyran-4-one	83.01582:24 96.40933:16 97.10169:16 135.04822:16 141.96201:17 143.95639:23 151.04036:18 153.05974:33 163.03645:29 163.04599:21 167.07028:21 182.96288:16 183.06815:17 192.0719:20 223.09938:28	223.099	11.01	6068	3628	3707	4307	6908	4923.6	4047	2988	2349	4104	3268	3351.2	1447	685	1266	1085	872	1071	1027	1556	1253	1290	1238	1272.8	319	873	351	667	1053	652.6	602	875	426	402	465	554	12082	10798	12306	13095	12523	12160.8
Metabolite_1987	Aspidinol B	132.06033:18 138.96661:21 143.96001:46 151.08217:108 166.47014:23 179.13783:25 183.06018:22 207.10423:18 225.11937:44	225.115	8.42	209	234	274	313	249	255.8	240	160	198	331	224	230.6	150	107	257	142	142	159.6	167	223	156	174	217	187.4	85	140	109	136	191	132.2	159	140	206	69	111	137	771	822	500	707	674	694.8
Metabolite_2306	Isopimpinellin	77.03664:17 106.04023:29 107.04955:23 119.03998:18 119.04841:27 121.06125:24 131.04237:17 131.04813:47 133.02267:20 145.02547:25 147.05153:17 149.05597:22 153.04984:22 159.04198:18 161.06844:17 162.03131:68 171.03181:31 175.03494:16 175.04274:63 176.03255:16 176.05043:62 177.05667:58 187.03804:33 190.03571:20 191.03326:60 191.06438:39 202.05989:17 204.04263:16 205.05251:189 208.0345:30 209.04289:…	247.063	2.9	402	544	401	298	334	395.8	264	279	351	330	304	305.6	1037	1117	999	969	960	1016.4	3218	4057	3055	3573	3206	3421.8	5073	5699	5864	6044	5733	5682.6	1734	1558	1650	1701	1275	1583.6	435	520	455	492	686	517.6
Metabolite_2403	Dehydropallidusol	65.03879:16 67.01659:64 83.00912:17 85.0783:31 99.00706:17 101.07204:16 107.05006:52 109.03426:20 111.04585:17 121.02724:211 121.06216:67 121.06909:20 122.03337:18 123.04536:16 131.04555:19 136.20442:38 137.02008:22 147.04546:34 148.05112:20 149.05434:86 149.06291:73 149.09494:20 153.05486:16 163.04047:35 167.07149:131 175.03999:20 177.01529:38 177.05612:663 177.12013:17 178.06351:64 193.05029:21…	251.126	11.01	859	951	554	789	999	830.4	1371	911	578	642	1030	906.4	205	244	320	227	299	259	286	663	454	307	410	424	240	186	227	489	218	272	392	246	196	202	217	250.6	9083	8814	8344	9427	8663	8866.2
Metabolite_2658	Apigenin	107.04584:20 173.06279:39 175.08084:25 203.07443:18 271.01166:16 271.06021:44	271.063	3.21	1330	1354	1230	1669	1645	1445.6	291	239	311	230	271	268.4	1032	1064	1181	1031	1095	1080.6	416	322	345	294	293	334	168	156	217	175	196	182.4	88	60	90	124	99	92.2	254	250	232	250	309	259
Metabolite_2730	2,3-Dihydro-5,7-dihydroxy-2,6-dimethyl-8-(3- methyl-2-butenyl)-4H-1-benzopyran-4-one	99.03945:16 147.07445:17 175.06836:17 203.06786:40 217.8623:17 221.07968:99 221.09717:19 234.06938:20 277.14413:44	277.147	12.75	718	726	4550	2971	661	1925.2	1021	1516	1476	5121	1939	2214.6	2055	184	573	552	1636	1000	404	1370	1082	601	738	839	203	3916	4174	294	2733	2264	1323	2386	2309	414	1556	1597.6	2521	2229	2287	3827	1670	2506.8
Metabolite_2743	2,3-Dihydro-5,7-dihydroxy-2,8-dimethyl-6-(3- methyl-2-butenyl)-4H-1-benzopyran-4-one	70.49107:21 147.0728:20 161.06229:16 203.07208:43 207.04886:17 207.10469:17 277.14084:65 277.15472:26	277.146	10.24	1701	4712	6192	3519	2087	3642.2	6445	3158	8751	4871	7048	6054.6	1236	246	1230	1023	621	871.2	440	825	1158	1598	1304	1065	485	745	252	530	2220	846.4	1037	2094	462	514	929	1007.2	1241	1128	918	995	688	994
Metabolite_2810	Linolenic acid	55.05533:22 67.05595:33 81.06395:24 91.04994:18 93.06779:20 95.08231:67 95.08727:40 102.06294:24 107.08252:20 111.07811:36 119.08025:29 121.06176:27 121.09782:16 123.11589:37 135.12437:21 145.09634:23 149.02072:18 149.05438:18 149.13573:18 163.04204:16 167.10434:28 171.12154:18 189.06287:16 189.16133:19 201.12302:16 221.07358:16 223.09212:16 223.10149:38 243.20844:20 259.12128:26 277.14343:16 278…	279.234	11.04	11287	6939	8543	6004	8613	8277.2	5079	3033	3312	4630	4232	4057.2	10159	4925	12599	10385	14080	10429.6	417	611	741	1606	1108	896.6	277	303	279	381	194	286.8	460	397	544	380	310	418.2	2396	2654	764	713	677	1440.8
Metabolite_3016	Brevifolin carboxylic acid	128.99554:21 163.04364:16 182.99213:22 191.03316:23 230.98169:16 231.028:21 247.02791:65 247.03786:16 275.02188:21 277.98483:16 293.03525:33	293.031	3.33	105	154	71	94	176	120	113	101	73	109	106	100.4	163	167	165	131	121	149.4	719	674	568	827	771	711.8	1378	1458	1465	1671	1501	1494.6	171	136	137	162	220	165.2	129	131	115	93	105	114.6
Metabolite_3294	Norbergenin	153.01625:32 280.42987:23	315.074	2.19	4503	4832	5005	4584	1022	3989.2	9700	8179	7499	1172	7975	6905	8632	9813	9312	10556	8766	9415.8	2808	2857	2458	2636	58396	13831	4477	4291	92044	4969	4497	22055.6	15782	11297	11337	14484	10256	12631.2	10819	13898	11355	11682	19308	13412.4
Metabolite_3482	Bergenin	107.05293:20 116.07095:16 126.03145:35 135.00807:18 163.04211:16 167.073:18 175.33464:21 177.02046:47 181.04831:88 184.99936:17 190.02995:18 191.03931:35 191.06807:18 193.03261:20 193.06245:16 199.03265:21 201.06638:25 202.02609:18 207.03542:20 209.04408:32 211.01324:17 212.01038:16 217.03644:17 226.0424:17 229.04884:16 233.15681:20 235.07138:27 241.01639:17 247.04823:17 247.06444:19 251.05008:43…	329.091	2.9	5306	5569	5680	4104	4126	4957	5076	4619	4334	5718	4378	4825	22789	28467	22508	25755	22894	24482.6	126976	115277	115085	124071	119369	120156	229277	220998	220186	248092	221871	228085	56162	45774	43469	51800	44549	48350.8	8217	9198	7632	8784	15857	9937.6
Metabolite_3554	Glucogallin	97.03693:16 109.02082:58 171.02014:18 171.03404:16 195.02409:157 219.02786:16 279.0513:41 315.07233:18 316.9902:16	333.085	1.84	2457	2826	2954	2857	2459	2710.6	3540	3867	3992	4260	4324	3996.6	3339	3725	3336	2893	3135	3285.6	267	238	222	205	207	227.8	223	341	258	383	392	319.4	98	82	86	93	93	90.4	1472	1621	1492	1383	1841	1561.8
Metabolite_3707	3,3',4-tri-O-methylellagic acid	187.05212:26 223.11882:17 313.04889:23 313.07162:16 345.0683:16 345.07977:28	345.064	5.86	541	647	569	555	583	579	461	565	304	497	407	446.8	870	760	685	928	782	805	4177	5333	4788	6509	5354	5232.2	5119	6061	4060	6616	5788	5528.8	891	636	773	878	660	767.6	4430	5264	4617	4539	5333	4836.6
Metabolite_3865	5-Hydroxy-2,6,8-trimethyl-8-(3,7-dimethyl-2, 6-octadienyl)-2H-1-benzopyran-4,7(3H,8H)-dione	149.09392:20 205.07097:23 205.07738:51 205.09029:50 218.06476:71 223.08101:34 223.09648:171 224.0981:32 250.13451:18 359.21365:17	359.225	12.52	276	308	557	592	299	406.4	356	312	360	467	471	393.2	384	108	241	194	263	238	151	360	324	313	508	331.2	107	370	496	189	478	328	337	364	236	216	490	328.6	1941	3217	1554	1837	895	1888.8
Metabolite_4029	Uzarigenin	151.09334:17 286.17593:16 375.23938:17 375.31671:24	375.255	11.19	2739	1976	1417	2571	3136	2367.8	790	689	407	947	647	696	122	147	424	141	155	197.8	167	201	214	119	184	177	108	109	100	248	197	152.4	97	129	180	155	124	137	16319	14983	15022	15382	19508	16242.8
Metabolite_4311	Malloapelin C	147.04893:17 177.0549:17 179.06989:36 208.0318:24 209.04436:18 285.11163:16 295.10031:16 345.13095:18 373.09949:29 403.10699:54	403.106	5.02	69	54	153	75	70	84.2	79	66	78	83	71	75.4	54	50	66	57	93	64	104	167	167	152	133	144.6	146	215	124	116	113	142.8	1435	684	1106	632	666	904.6	75	110	96	107	136	104.8
Metabolite_4423	Aquillochin	91.05022:20 131.04733:18 161.05336:16 162.06494:17 164.62541:16 167.06969:20 192.0715:20 197.07687:17 207.0267:20 261.78943:20 277.55618:25 399.11649:16 400.1116:18 400.12881:41 417.11633:151	417.117	5.5	98	109	119	136	129	118.2	112	108	138	164	98	124	135	139	248	102	142	153.2	492	724	655	1061	631	712.6	640	608	488	632	904	654.4	2727	1346	1983	1100	1181	1667.4	1107	1190	977	1143	1768	1237
Metabolite_4525	Taraxerone	95.08227:18 133.10286:20 145.10739:17 165.16737:44 185.11368:18 255.22467:17 409.3757:16	425.375	11.73	99	93	107	112	81	98.4	130	111	130	68	90	105.8	85	237	107	100	112	128.2	537	574	522	1586	605	764.8	3737	3371	827	6411	914	3052	98	216	139	110	104	133.4	198	134	180	155	198	173
Metabolite_4526	12-Ursen-3-one	95.08297:55 97.1014:17 165.09401:18 177.17047:18 178.13148:21 190.07454:21 201.16136:17 223.09871:30 227.18999:37 231.22226:24 254.23425:39 259.20343:26 271.23776:21 324.05359:16 411.34366:22 425.35995:41 425.38293:60	425.378	11.13	229	137	157	226	215	192.8	155	162	162	217	182	175.6	186	298	251	155	261	230.2	623	815	758	1443	746	877	2081	3053	1944	3360	1590	2405.6	149	261	158	223	210	200.2	364	280	215	365	296	304
Metabolite_4554	Lupeol	71.09283:17 139.11343:20 139.12074:33 185.11842:53 185.12837:204 203.08418:33 223.09152:40 297.25797:17 299.11661:32 315.28027:20 427.39478:20	427.397	12.6	5012	3723	3731	3472	3867	3961	4431	3476	3610	3255	3905	3735.4	4412	4926	4330	5238	4461	4673.4	4341	4102	4447	4748	3370	4201.6	5961	3331	4220	5589	3457	4511.6	4164	3728	4191	4381	3967	4086.2	4028	3517	4727	3968	5284	4304.8
Metabolite_4781	Mallopallidusol	93.06924:22 157.06287:16 225.11301:115 226.11105:16 228.11249:17 237.11644:30 431.08661:16 445.18713:68	445.185	12.02	2851	1874	927	1594	2784	2006	1993	1489	811	1096	2013	1480.4	311	296	844	350	468	453.8	503	723	562	790	788	673.2	219	223	128	712	317	319.8	446	165	234	183	117	229	6070	3832	6034	6532	3877	5269
Metabolite_4784	Mallotojaponin	121.02873:28 147.03653:19 161.05847:18 175.0345:84 179.85086:16 181.04956:16 183.04565:31 193.03947:76 193.0495:111 194.04436:21 194.05493:38 197.07137:62 197.08983:17 204.03995:27 209.07513:116 212.08519:16 236.09904:40 237.09979:17 237.11952:35 249.08565:23 249.1116:448 250.10629:18 250.13303:23 287.05542:19 287.20773:20 298.08035:17 388.11017:20 389.10065:28 389.12714:34 390.12885:23 429.05765…	445.185	9.9	112	228	203	200	140	176.6	174	188	205	476	268	262.2	155	160	148	127	94	136.8	270	145	190	75	239	183.8	64	86	74	113	150	97.4	82	101	124	59	86	90.4	185	248	183	306	206	225.6
Metabolite_4854	Quercetin 3-O-L-rhamnoside	80.05806:16 87.04937:20 93.02814:16 129.05362:54 147.05605:25 153.01927:21 258.66498:20 285.04022:17 287.04764:22 303.05014:596 304.05374:81 449.07837:32 449.09702:21	449.109	3.91	5581	6149	5992	6020	6213	5991	7124	6248	6629	7390	6898	6857.8	1034	1009	919	1191	977	1026	293	335	258	399	231	303.2	342	425	408	407	348	386	177	164	125	214	142	164.4	612	655	646	692	934	707.8
Metabolite_4909	4-hydroxy-2-methoxyphenol l-0-b-D-(6’-0-galloyl)glucoside	62.6428:16 138.05133:16 138.05815:23 281.29501:21 454.73499:16 455.09543:94 455.11972:676	455.117	0.93	14588	13464	14022	11972	12021	13213.4	9848	6667	7254	8855	7666	8058	6274	993	6096	7546	5301	5242	647	797	664	723	808	727.8	173	106	207	176	197	171.8	152	151	104	94	153	130.8	2366	1708	1626	1772	2606	2015.6
Metabolite_4951	epi-Gallocatechin 3-O-gallate	135.04129:19 139.04198:80 140.04626:36 163.03537:30 218.9743:16 247.0592:20 284.01657:18 289.06696:18 333.06839:16	459.097	3.49	79	66	53	65	49	62.4	85	54	111	93	49	78.4	53	47	56	89	49	58.8	618	768	705	827	708	725.2	3870	5019	3192	5112	4484	4335.4	82	118	62	70	94	85.2	80	81	54	106	54	75
Metabolite_4960	Mallopallidol	151.04242:37 183.06383:151 203.05019:25 222.07602:17 249.10838:20 266.11292:20 282.09058:33 292.8746:16 339.09308:24 381.06479:16 403.12567:20 403.14584:17 405.17151:20 427.16171:33 427.34543:17 428.17941:22 459.19843:65	459.201	10.38	209	275	396	388	384	330.4	392	365	368	212	440	355.4	163	57	135	79	67	100.2	59	194	986	129	928	459.2	74	119	154	156	332	167	77	132	89	54	74	85.2	196	279	142	163	113	178.6
Metabolite_5008	Mallotochromanol	155.03793:17 179.03246:30 193.05266:20 209.07684:32 225.09056:18 237.11784:40 249.11322:139 250.10994:16 267.06424:17 287.09317:16 319.11978:21 327.08374:16 331.08182:22 369.10196:21 373.07095:20 373.08475:33 373.10858:33 393.12042:41 403.13223:16 404.16476:28 405.12057:59 411.15079:16 443.18607:16 461.17245:54 461.1955:38 461.22647:16	461.182	10.36	392	1454	1118	610	593	833.4	1286	796	2406	1419	1827	1546.8	167	275	406	112	101	212.2	162	346	242	170	244	232.8	243	129	77	393	252	218.8	115	153	142	84	132	125.2	2864	5078	3012	4106	1977	3407.4
Metabolite_5009	Isomallotochromanol	133.08794:33 157.06723:16 163.04208:16 177.11909:35 205.0775:16 209.06775:17 221.07364:16 223.05888:22 225.07042:21 233.07712:22 243.20958:30 249.10983:41 251.08115:27 253.106:17 254.09917:18 261.26062:20 342.1503:16 355.16403:16 373.1011:16 392.12061:17 392.15726:19 396.11005:16 429.16202:23 431.10709:18 445.15018:17 461.32089:16	461.181	11.07	1706	1295	1287	1179	1671	1427.6	1660	998	922	1379	1852	1362.2	291	348	671	314	271	379	404	472	409	261	452	399.6	146	277	139	849	336	349.4	285	312	328	169	280	274.8	5569	6128	7481	7690	7053	6784.2
Metabolite_5010	Mallotucin B	168.05612:21 205.07695:34 208.10527:17 235.09464:16 237.1091:18 313.08179:18 321.03821:25 387.10873:17 404.15103:25 405.10318:49 405.13324:17 459.16766:20 461.17093:37	461.182	10.89	3999	2142	2827	2084	5162	3242.8	3193	2162	1512	4127	3601	2919	572	2711	3763	965	1491	1900.4	2831	1356	733	1848	843	1522.2	1233	501	475	5126	435	1554	366	249	468	276	236	319	7657	7340	9322	2896	3487	6140.4
Metabolite_5097	4-O-galloylnorbergenin	103.04491:16 153.02115:102 217.04771:20 249.04778:18 261.03458:24 287.02454:20 287.11813:20 297.05536:16 302.00272:17 313.04425:16	467.082	3.11	3479	4981	5080	4124	4226	4378	725	4125	5068	4777	4966	3932.2	5111	4902	5075	3841	5125	4810.8	1882	1894	2160	1958	1704	1919.6	3586	3535	2997	3959	3388	3493	640	585	541	770	420	591.2	1224	1432	1187	1089	1473	1281
Metabolite_5100	11-O-galloylnorbergenin	79.02082:16 125.02142:59 153.0175:1251 154.01271:46 154.02409:93 155.02217:16 162.54594:16 163.21696:20 182.77939:16 219.03517:20 237.03784:20 237.05013:42 278.0296:16 279.0408:40 279.06125:51 297.04596:31 449.02686:18 449.06183:38 449.0751:123 450.04575:20 450.09277:21 467.06995:87 467.08875:153	467.082	3.3	11296	12321	12546	12277	12107	12109.4	11394	11078	11960	12747	12494	11934.6	1544	3242	4060	4355	1521	2944.4	1956	7044	6461	7373	5989	5764.6	13042	13925	11603	13637	13365	13114.4	845	712	676	821	539	718.6	4753	3647	4077	3702	4714	4178.6
Metabolite_5182	Isobutyryl mallotojaponin	110.0704:29 176.03931:33 183.05789:36 195.06729:16 209.09642:20 220.6396:16 221.08943:17 223.10243:29 277.1373:19 302.06198:31 302.07944:22 346.07138:16 357.12555:17 359.11215:16 373.20312:18 385.11798:39 385.13174:31 386.13037:22 389.17596:23 417.1507:24 417.16574:36 441.18228:32 442.20471:27 473.17862:42 473.2128:82	473.216	10.69	160	812	262	348	386	393.6	312	527	718	488	652	539.4	168	341	248	125	102	196.8	404	522	248	210	263	329.4	1688	210	155	164	403	524	206	347	135	112	228	205.6	956	1409	1921	1608	1404	1459.6
Metabolite_5183	Homomallopallidol	188.04388:16 209.07663:18 221.08046:17 265.15097:46 277.14246:149 277.15567:47 473.20135:20	473.215	9.48	68	436	201	165	323	238.6	109	175	380	130	122	183.2	104	93	148	76	62	96.6	134	452	169	94	164	202.6	179	146	102	123	313	172.6	112	185	104	48	105	110.8	244	232	94	204	142	183.2
Metabolite_5190	Butyryl mallotojaponin	146.44188:16 191.06512:21 197.07747:20 197.08493:19 203.05917:19 203.0761:28 209.08989:16 210.08821:19 221.0506:16 221.07994:132 226.77271:18 265.15009:17 277.14502:337 375.13824:16 419.13052:16 473.22366:79	473.217	10.35	174	317	266	271	591	323.8	172	286	463	211	211	268.6	167	72	301	148	112	160	132	298	231	169	248	215.6	2575	266	166	105	2003	1023	174	273	191	97	187	184.4	223	319	155	189	117	200.6
Metabolite_5295	4-O-galloylbergenin	103.03905:22 125.0248:16 153.0072:35 153.01765:92 179.99428:80 188.87144:16 196.0336:17 208.01242:16 209.04317:27 282.06375:16 337.02869:25 463.07828:24 481.09769:61	481.097	3.3	2908	3155	2633	2447	2503	2729.2	734	669	674	760	674	702.2	10462	11916	10163	11294	9756	10718.2	1113	1264	875	1074	1104	1086	451	343	432	506	308	408	131	164	123	155	111	136.8	874	694	912	719	888	817.4
Metabolite_5296	11-O-galloylbergenin	125.02034:20 153.01581:234 155.02502:20 181.04448:34 183.05742:22 213.0434:23 234.05588:25 247.06227:32 260.03354:22 263.06442:16 264.06757:16 294.07794:16 311.02719:35 315.62579:26 375.14026:20 459.50302:17 481.10815:35	481.098	3.8	931	743	659	844	714	778.2	296	194	280	307	318	279	3688	4187	3867	4436	3833	4002.2	3516	3473	3488	3562	3201	3448	11110	11125	9930	12142	10590	10979.4	3447	2261	2263	2735	2289	2599	305	383	304	431	478	380.2
Metabolite_5332	4-hydroxy-2,6-dimethoxyphenol l-O-b-D-(6’-O-galloyl)glucoside	187.07185:25 191.07483:20 219.05988:37 219.07327:24 237.07607:142 399.12091:23 427.13409:16 485.14395:35	485.128	4.73	1802	2015	1851	2125	1955	1949.6	1518	1383	1444	1666	1717	1545.6	235	251	241	223	202	230.4	137	170	218	163	161	169.8	94	116	105	123	105	108.6	76	60	71	51	75	66.6	3145	2206	2406	2659	3327	2748.6
Metabolite_5409	Isomallotolerin	167.06677:34 177.05692:17 203.06097:21 225.03844:18 227.07463:23 227.11336:20 314.06052:16 329.09006:16 331.11423:79 337.11459:38 353.11533:16 383.10477:16 397.13416:21 401.12408:18 401.14325:56 402.11508:20 433.14233:41 488.39459:24 489.20999:147	489.212	10.7	449	631	933	613	811	687.4	1176	555	1251	820	1609	1082.2	161	215	187	123	192	175.6	308	456	295	156	336	310.2	140	200	107	125	293	173	247	174	107	86	126	148	838	1196	3906	4275	2901	2623.2
Metabolite_5410	Mallotolerin	151.03574:18 165.05273:18 167.01428:25 189.09795:16 223.09538:20 244.07016:21 247.06361:36 289.07846:16 293.07602:19 313.47134:19 331.06628:22 338.12589:22 340.0788:18 361.10159:18 385.11499:28 385.13208:20 386.12881:17 387.13632:33 397.12732:24 401.06424:17 433.12097:16 433.1449:53 433.1636:17 434.15091:23 436.17206:24 441.19504:53 459.19528:35 489.19638:38 489.22043:25 489.27924:20	489.212	10.49	303	597	881	448	556	557	763	462	872	530	745	674.4	82	85	170	81	78	99.2	164	171	210	113	207	173	160	128	72	90	255	141	108	205	99	89	85	117.2	335	593	162	299	134	304.6
Metabolite_5439	Butyryl mallotolerin	167.03731:20 206.08951:32 207.05852:22 223.09001:35 251.06897:28 318.09006:26 355.10623:16 355.1293:19 367.14148:24 405.13751:20 445.19586:29 491.18494:18	491.194	10.07	128	226	309	397	150	242	109	111	183	463	188	210.8	76	89	112	93	90	92	188	444	192	106	328	251.6	59	91	61	140	383	146.8	102	101	128	80	59	94	180	275	183	150	142	186
Metabolite_5534	Mallotophilippen A	135.12427:35 165.05087:17 176.04182:18 177.0491:28 181.04898:40 193.03749:18 193.0544:37 194.05667:52 195.06201:17 195.07599:30 196.06137:22 196.07249:16 201.09549:16 249.11281:230 250.11234:20 251.12271:39 252.14449:28 306.1853:16 355.08282:20 375.09097:16 378.19913:18 418.15955:25 499.24167:18	499.234	8.81	48	94	140	162	99	108.6	85	140	135	64	56	96	52	34	77	68	40	54.2	51	90	174	110	148	114.6	161	100	72	71	2787	638.2	65	114	70	60	120	85.8	103	160	48	111	38	92
Metabolite_5543	Ursolic acid acetate	89.06335:16 147.05255:20 149.06178:16 203.06531:16 211.14206:18 241.15224:23 243.05579:17 272.09167:18 273.23822:17 291.17313:16 404.11063:18 499.37274:35	499.379	11.07	147	123	155	124	138	137.4	167	157	121	163	153	152.2	173	158	171	140	145	157.4	618	578	498	1113	575	676.4	340	416	380	449	288	374.6	798	550	865	1037	680	786	127	195	166	133	161	156.4
Metabolite_5645	Aviculin	141.05634:18 183.05907:21 229.092:24 245.08371:17 357.1871:16 391.18073:16 402.16678:20 419.16959:16 437.17273:34 456.18823:19 465.16983:17 489.19913:16 507.21463:85 507.2308:35	507.228	8.63	639	543	814	635	1211	768.4	717	462	659	541	899	655.6	64	63	79	78	78	72.4	40	143	64	58	90	79	67	68	45	50	83	62.6	89	39	59	51	56	58.8	430	524	151	250	238	318.6
Metabolite_6129	Panoside	107.05076:16 146.05473:17 182.08206:23 183.08124:23 188.14359:59 282.11154:33 295.17047:20 310.04016:16 321.13892:18 440.211:22 468.18823:17 485.96741:19 535.29669:17 552.12067:16 553.24628:16 553.28741:36 553.30334:38	553.303	4.39	860	1075	993	825	843	919.2	1664	1823	1425	1892	1648	1690.4	530	539	534	550	516	533.8	92	66	56	74	73	72.2	54	100	81	92	57	76.8	24	74	52	26	34	42	511	449	575	530	563	525.6
Metabolite_6589	Luteolin 7-O-(4"-O-(E)-coumaroyl)- b-glucopyranoside	147.026:17 147.04791:77 287.03116:19 287.05078:382 287.06906:83 288.04623:20 288.06403:25 309.09412:21 433.1138:17 506.91809:16 595.12122:61 595.16583:57 595.2356:16	595.145	5.19	3586	3939	4105	4985	4650	4253	1778	1597	1585	1717	1861	1707.6	418	435	372	483	351	411.8	122	88	54	80	155	99.8	83	111	61	183	90	105.6	53	43	88	82	35	60.2	14059	19095	20402	21370	20728	19130.8
Metabolite_6591	vicenin2	182.06604:25 258.90079:16 307.07077:18 325.07745:23 391.08426:48 406.10657:20 439.08203:16 463.11893:22 475.11649:16 559.14856:20 577.13507:18 578.18237:23 595.14618:28 595.185:42	595.149	2.98	589	684	595	649	779	659.2	2007	1766	1855	2478	2187	2058.6	109	141	114	162	114	128	314	412	353	596	439	422.8	1026	1059	621	1214	1024	988.8	67	52	152	65	91	85.4	222	312	382	241	337	298.8
Metabolite_6594	kaempferol	70.03658:50 71.048:25 85.02834:41 95.15726:19 111.04913:20 129.05447:20 147.06111:25 147.06828:18 162.19157:16 164.34898:17 227.03163:17 287.05408:2095 288.05176:132 288.06018:224 289.05981:19 289.07745:25 309.12164:25 330.0672:17 379.36459:23 433.11536:18 434.11905:18 449.08499:16 449.10919:201 450.12115:16 509.98718:17 579.99268:34 595.13617:26 595.16937:344 595.18665:97	595.166	4.19	15079	16516	16743	16756	15700	16158.8	18327	17761	18752	20609	18618	18813.4	524	594	528	607	423	535.2	115	134	192	178	206	165	163	246	145	363	186	220.6	192	101	115	80	83	114.2	1394	1580	1561	1527	1852	1582.8
Metabolite_6874	Chrysoeriol 7-O-(4"-O-(E)- coumaroyl)-b-glucopyranoside	109.07056:23 129.05244:24 148.045:18 185.10849:17 301.06979:203 302.07175:23 577.21765:18 609.17133:18	609.162	5.57	591	588	579	765	658	636.2	310	242	266	380	312	302	202	124	179	218	269	198.4	49	59	48	73	49	55.6	57	70	62	88	55	66.4	45	53	35	85	29	49.4	1902	2490	2867	2945	2938	2628.4
Metabolite_6941	Prodelphinidin B3	127.03073:28 127.03766:16 132.99194:17 139.04025:20 175.03981:16 179.03355:55 197.05745:30 203.03851:22 213.05724:18 258.04263:18 276.05554:16 287.04916:16 290.05408:25 299.0679:19 305.06729:33 307.07791:20 315.04605:25 317.07108:16 443.0213:16 443.08154:16 443.10663:50 445.10196:26 491.10391:28 611.13293:137	611.141	2.03	60	68	53	64	112	71.4	59	43	48	53	35	47.6	63	72	91	61	79	73.2	603	672	738	835	695	708.6	3208	4123	2298	3440	3378	3289.4	37	43	68	42	37	45.4	200	134	107	100	145	137.2
Metabolite_6945	Rutin	52.30255:23 52.64082:16 70.67079:24 70.86783:16 71.04523:20 71.05064:46 71.15885:21 72.94315:17 73.02914:18 75.03894:18 76.04619:20 81.03445:24 85.02721:303 86.02825:20 96.50629:20 97.02425:23 101.31615:24 113.33259:25 120.35114:16 125.19417:17 125.87281:30 127.03258:16 127.03828:41 127.05114:17 129.00278:20 129.05312:387 131.05487:25 136.87187:42 145.04773:92 145.05516:30 147.06206:81 147.07045:…	611.163	3.9	153398	181467	169901	171667	166243	168535	187051	187381	194157	210155	191167	193982	26031	25298	23534	28052	21929	24968.8	1904	1670	1963	2412	2681	2126	2298	2693	1900	3405	2523	2563.8	1497	425	294	369	316	580.2	15722	16946	19665	19394	25937	19532.8
Metabolite_6947	Quercetin 3-O-b-neohesperoside	139.05145:53 151.04858:16 203.04622:20 229.06348:25 288.07269:41 288.08966:25 289.09073:17 305.08517:16 307.10587:81 383.0643:26 403.76492:20 425.12155:34 443.12378:29 443.13498:19 470.10791:17 485.11847:20 610.14954:20 611.18268:108	611.167	2.58	35	70	92	91	75	72.6	41	72	53	72	52	58	75	45	63	60	73	63.2	283	428	372	618	354	411	1528	1741	1029	1954	1400	1530.4	53	46	25	108	44	55.2	113	100	110	125	131	115.8
Metabolite_7362	4,11-di-O-galloylbergenin	123.0102:21 127.04421:19 141.03175:73 154.05626:39 261.04578:32 261.05911:20 262.05499:16 265.06464:17 371.06421:24 395.01236:27 415.95279:23 427.04828:27 428.04544:109 429.06329:30 447.05539:22 453.02902:20 455.70154:21 472.06213:16 495.05972:19 514.04303:38 531.07898:26 532.06494:16 615.08069:16 617.5462:33 632.11737:16 632.32318:16 633.11554:34 633.18811:16	633.108	3.09	367	450	260	351	380	361.6	158	174	243	165	223	192.6	131	159	251	130	203	174.8	1005	726	1171	941	976	963.8	1361	1684	907	1326	1330	1321.6	207	134	244	171	112	173.6	395	413	345	226	312	338.2
Metabolite_7363	3,4-di-O-galloylbergenin	109.03301:16 125.03559:18 127.04421:31 153.02434:61 190.04034:20 207.04295:20 273.02985:24 319.01114:21 319.02219:38 337.03241:128 379.04782:20 463.07199:28 633.09534:18 633.11902:58 633.1571:17	633.104	2.79	1392	1343	878	933	1173	1143.8	300	401	261	336	347	329	154	122	202	225	259	192.4	79	60	79	135	126	95.8	102	122	96	78	75	94.6	49	32	36	40	35	38.4	306	205	334	164	195	240.8
Metabolite_7642	Furosin	109.02908:16 152.99844:17 153.00784:18 153.01726:30 153.02499:40 277.03488:18 291.01129:23 313.06412:25 337.00873:54 337.04544:32 379.02646:20 406.52664:19 445.02084:16 463.03659:115 464.05685:40 481.07419:26 633.06226:16 633.08783:40 651.05597:41 651.08673:74	651.085	2.79	1587	1892	1801	2391	1733	1880.8	508	507	510	667	550	548.4	295	305	330	228	296	290.8	74	83	84	103	79	84.6	127	105	68	95	85	96	52	49	25	71	48	49	304	324	232	288	258	281.2
Metabolite_8554	Mixture of (±)-hydnocarpin 7-O-(4"-O-(E)- coumaroyl) b-glucopyranoside/(±)- hydnocarpin-D 7-O-(4"-O-(E)- coumaroyl) b-glucopyranoside	147.05417:16 165.05458:20 342.08246:21 447.09933:17 447.11191:20 465.11697:228 465.13177:64 466.0994:27 466.12375:22 468.13434:24 773.17773:27 773.21649:113 773.24615:50	773.21	6.14	604	748	590	1062	931	787	492	315	387	460	386	408	316	318	453	331	586	400.8	26	56	47	50	70	49.8	76	26	55	73	40	54	63	63	49	47	39	52.2	1710	2291	2542	2777	2404	2344.8
Metabolite_9152	Geraniin	274.9957:19 293.0253:27 316.99838:26 426.00424:20 450.1431:16 452.96494:24 455.00531:17 465.03406:16 470.99075:24 472.01001:26 472.02359:16 598.065:19 639.08496:16 665.01166:21 751.08557:22 936.04266:27 937.07959:18 951.12738:20 952.646:16 953.1142:65	953.087	3.45	359	444	508	446	440	439.4	347	321	399	455	392	382.8	496	422	460	411	451	448	1335	1900	1532	2075	1674	1703.2	1742	2015	1066	1755	1902	1696	140	107	137	148	169	140.2	1817	2153	3103	2870	2584	2505.4
