# Supplementary material for: Gene-Metabolite Network Analysis Revealed Tissue-Specific Accumulation of Therapeutic Metabolites in Mallotus japonicus
Source: Int J Mol Sci. 2021 Aug 17;22(16):8835. doi: 10.3390/ijms22168835 (PMC8396295; doi:10.3390/ijms22168835)
Supplement: Supplementary file 1 [file ijms-22-08835-s001.zip › Supplementary_Table S5_WCNA_modules_identified_using_metabolome_data with legend_Megha.xlsx]

## Sheet: MetM1
Table S5 Summary of metabolite modules and the included metabolites using WCNA analysis for MS2 confirmed metabolites in Mallotus japonicus
Metabolites	Young_Leaf	Mature_Leaf	Young_Stem	Mature_Stem	Bark	Central_Cylinder	Inflorescence
Mallopallidol	330.4	355.4	100.2	459.2	167	85.2	178.6
Homomallopallidol	238.6	183.2	96.6	202.6	172.6	110.8	183.2
Butyryl_mallotolerin	242	210.8	92	251.6	146.8	94	186
Metabolite_Black	270.333	249.8	96.2667	304.467	162.133	96.6667	182.6	Average

## Sheet: MetM2
Table S5 Summary of metabolite modules and the included metabolites using WCNA analysis for MS2 confirmed metabolites in Mallotus japonicus
Metabolites	Young_Leaf	Mature_Leaf	Young_Stem	Mature_Stem	Bark	Central_Cylinder	Inflorescence
chromene	309.8	337.2	236.8	275.2	240.8	137.6	1595
Isoscopoletin	640.4	700	354.2	285.6	373	153.8	9809.8
Scopoletin	1405.6	1204.6	714.6	841.6	524.8	124.8	7180
2_6_Dihydroxy_3_methyl_4_methoxyacetophenone	382.2	583.8	121.4	122.8	98	88.4	2207.6
Phloroisobutyrophenone	288.4	266	199.2	250.6	204.6	142.2	1433.4
Mallophenone	332.6	207.2	86.6	102.6	118.2	90.6	9957
2_3_Dihydro_5_7_dihydroxy_2_6_8_trimethyl_4H1_benzopyran_4_one	4923.6	3351.2	1071	1272.8	652.6	554	12160.8
AspidinolB	255.8	230.6	159.6	187.4	132.2	137	694.8
Dehydropallidusol	830.4	906.4	259	424	272	250.6	8866.2
5_Hydroxy_2_6_8_trimethyl_8_2H_1_benzopyran_4_7(3H_8H)_dione	406.4	393.2	238	331.2	328	328.6	1888.8
Uzarigenin	2367.8	696	197.8	177	152.4	137	16242.8
Mallopallidusol	2006	1480.4	453.8	673.2	319.8	229	5269
Mallotochromanol	833.4	1546.8	212.2	232.8	218.8	125.2	3407.4
Isomallotochromanol	1427.6	1362.2	379	399.6	349.4	274.8	6784.2
MallotucinB	3242.8	2919	1900.4	1522.2	1554	319	6140.4
Isobutyryl_mallotojaponin	393.6	539.4	196.8	329.4	524	205.6	1459.6
4_hydroxy_2_6_dimethoxyphenol l_O_b_D_galloyl_glucoside	1949.6	1545.6	230.4	169.8	108.6	66.6	2748.6
Isomallotolerin	687.4	1082.2	175.6	310.2	173	148	2623.2
Luteolin 7_O_ b_glucopyranoside	4253	1707.6	411.8	99.8	105.6	60.2	19130.8
Chrysoeriol 7_O_b_glucopyranoside	636.2	302	198.4	55.6	66.4	49.4	2628.4
hydnocarpin_D 7_O_b_glucopyranoside	787	408	400.8	49.8	54	52.2	2344.8
Metabolite_turquoise	1350.46	1036.64	390.352	386.343	312.867	174.981	5932.03	Average

## Sheet: MetM3
Table S5 Summary of metabolite modules and the included metabolites using WCNA analysis for MS2 confirmed metabolites in Mallotus japonicus
Metabolites	Young_Leaf	Mature_Leaf	Young_Stem	Mature_Stem	Bark	Central_Cylinder	Inflorescence
Nicotinic_acid	3864.2	1417	3143.6	775.4	286.8	268.4	1028.2
Malloapeltine	165754	122686	246417	7058.2	2155.8	534.8	4967.6
galic_acid	8688.8	5739.8	18025.2	1193.8	768.4	336.8	6162.6
Apigenin	1445.6	268.4	1080.6	334	182.4	92.2	259
Linolenic_acid	8277.2	4057.2	10429.6	896.6	286.8	418.2	1440.8
4_O_galloylbergenin	2729.2	702.2	10718.2	1086	408	136.8	817.4
Metabolite_magenta	31793.2	22478.4	48302.4	1890.67	681.367	297.867	2445.93	Average

## Sheet: MetM4
Metabolites	Young_Leaf	Mature_Leaf	Young_Stem	Mature_Stem	Bark	Central_Cylinder	Inflorescence
3_3'_4_tri_O_methylellagic acid	579	446.8	805	5232.2	5528.8	767.6	4836.6
Geraniin	439.4	382.8	448	1703.2	1696	140.2	2505.4
Metabolite_greenyellow	509.2	414.8	626.5	3467.7	3612.4	453.9	3671	Average

## Sheet: MetM5
Table S5 Summary of metabolite modules and the included metabolites using WCNA analysis for MS2 confirmed metabolites in Mallotus japonicus
Metabolites	Young_Leaf	Mature_Leaf	Young_Stem	Mature_Stem	Bark	Central_Cylinder	Inflorescence
Mallorepine	30916.4	29430.6	34660	16201	30417.4	1445.8	9308.4
MalloapelinC	84.2	75.4	64	144.6	142.8	904.6	104.8
Aquillochin	118.2	124	153.2	712.6	654.4	1667.4	1237
4_O_galloylnorbergenin	4378	3932.2	4810.8	1919.6	3493	591.2	1281
Metabolite_Green	8874.2	8390.55	9922	4744.45	8676.9	1152.25	2982.8	Average

## Sheet: MetM6
Table S5 Summary of metabolite modules and the included metabolites using WCNA analysis for MS2 confirmed metabolites in Mallotus japonicus
Metabolites	Young_Leaf	Mature_Leaf	Young_Stem	Mature_Stem	Bark	Central_Cylinder	Inflorescence
Isopimpinellin	395.8	305.6	1016.4	3421.8	5682.6	1583.6	517.6
Brevifolin_carboxylic_acid	120	100.4	149.4	711.8	1494.6	165.2	114.6
Norbergenin	3989.2	6905	9415.8	13831	22055.6	12631.2	13412.4
Bergenin	4957	4825	24482.6	120156	228085	48350.8	9937.6
Taraxerone	98.4	105.8	128.2	764.8	3052	133.4	173
12_Ursen_3_one	192.8	175.6	230.2	877	2405.6	200.2	304
epi_Gallocatechin 3_O_gallate	62.4	78.4	58.8	725.2	4335.4	85.2	75
Butyryl_mallotojaponin	323.8	268.6	160	215.6	1023	184.4	200.6
11_O_galloylbergenin	778.2	279	4002.2	3448	10979.4	2599	380.2
MallotophilippenA	108.6	96	54.2	114.6	638.2	85.8	92
ProdelphinidinB3	71.4	47.6	73.2	708.6	3289.4	45.4	137.2
Quercetin 3_O_b_neohesperoside	72.6	58	63.2	411	1530.4	55.2	115.8
4_11_di_O_galloylbergenin	361.6	192.6	174.8	963.8	1321.6	173.6	338.2
Metabolite_Brown	887.062	1033.66	3077.62	11257.6	21991.7	5099.46	1984.48	Average

## Sheet: MetM7
Table S5 Summary of metabolite modules and the included metabolites using WCNA analysis for MS2 confirmed metabolites in Mallotus japonicus
Metabolite	Young_Leaf	Mature_Leaf	Young_Stem	Mature_Stem	Bark	Central_Cylinder	Inflorescence
1_3_5_Benzenetriol	4067	5465.2	1500.4	931.4	752.8	493.4	2358.2
Methyl_gallate	1750.8	1304.2	641.4	439.2	336.6	240.2	405.4
Ferulic acid	1079.4	1060.2	346.2	242.2	206.4	97.8	194.4
2_3_Dihydro_5_7_dihydroxy_2_8_dimethyl_6_4H_1_benzopyran_4_one	3642.2	6054.6	871.2	1065	846.4	1007.2	994
Glucogallin	2710.6	3996.6	3285.6	227.8	319.4	90.4	1561.8
Lupeol	3961	3735.4	4673.4	4201.6	4511.6	4086.2	4304.8
Mallotojaponin	176.6	262.2	136.8	183.8	97.4	90.4	225.6
Quercetin 3_O_L_rhamnoside	5991	6857.8	1026	303.2	386	164.4	707.8
4_hydroxy_2_methoxyphenol l_0_b_D_galloyl_glucoside	13213.4	8058	5242	727.8	171.8	130.8	2015.6
Mallotolerin	557	674.4	99.2	173	141	117.2	304.6
Aviculin	768.4	655.6	72.4	79	62.6	58.8	318.6
Panoside	919.2	1690.4	533.8	72.2	76.8	42	525.6
vicenin2	659.2	2058.6	128	422.8	988.8	85.4	298.8
kaempferol	16158.8	18813.4	535.2	165	220.6	114.2	1582.8
Rutin	168535	193982	24968.8	2126	2563.8	580.2	19532.8
3_4_di_O_galloylbergenin	1143.8	329	192.4	95.8	94.6	38.4	240.8
Furosin	1880.8	548.4	290.8	84.6	96	49	281.2
Metabolite_Blue	13365.6	15032.1	2620.21	678.847	698.388	440.353	2108.99	Average

## Sheet: Unassigned
Table S5 Summary of metabolite modules and the included metabolites using WCNA analysis for MS2 confirmed metabolites in Mallotus japonicus
Metabolites	Young_Leaf	Mature_Leaf	Young_Stem	Mature_Stem	Bark	Central_Cylinder	Inflorescence
2_3_Dihydro_5_7_dihydroxy_2_6_dimethyl_8_4H_1_benzopyran_4_one	1925.2	2214.6	1000	839	2264	1597.6	2506.8
11_O_galloylnorbergenin	12109.4	11934.6	2944.4	5764.6	13114.4	718.6	4178.6
Ursolic_acid_acetate	137.4	152.2	157.4	676.4	374.6	786	156.4
Metabolite_Grey	4724	4767.13	1367.27	2426.67	5251	1034.07	2280.6	Average

## Sheet: WCNA_metabolite_module_summary
Table S5 Summary of metabolite modules and the included metabolites using WCNA analysis for MS2 confirmed metabolites in Mallotus japonicus
Metabolite	Young_Leaf	Mature_Leaf	Young_Stem	Mature_Stem	Bark	Central_Cylinder	Inflorescence
MetM7	13365.6	15032.1	2620.21	678.847	698.388	440.353	2108.99	Average value of all the metabolites in the module
MetM6	887.062	1033.66	3077.62	11257.6	21991.7	5099.46	1984.48
MetM5	8874.2	8390.55	9922	4744.45	8676.9	1152.25	2982.8
MetM4	509.2	414.8	626.5	3467.7	3612.4	453.9	3671
MetM3	31793.2	22478.4	48302.4	1890.67	681.367	297.867	2445.93
MetM2	1350.46	1036.64	390.352	386.343	312.867	174.981	5932.03
MetM1	270.333	249.8	96.2667	304.467	162.133	96.6667	182.6
	Young_Leaf	Mature_Leaf	Young_Stem	Mature_Stem	Bark	Central_Cylinder	Inflorescence	Eigen values of the identified odules
ME_MetM7	0.546686	0.626382	-0.172168	-0.251206	-0.302618	-0.334259	-0.112817
ME_MetM6	-0.226113	-0.239468	-0.188159	0.110589	0.885911	-0.158834	-0.183925
ME_MetM5	0.324527	0.282851	0.386767	-0.102324	0.141309	-0.741255	-0.291875
ME_MetM4	-0.310853	-0.335077	-0.289616	0.375098	0.398739	-0.363246	0.524955
ME_MetM3	0.433769	-0.0316369	0.700121	-0.247529	-0.325149	-0.346811	-0.182765
ME_MetM2	-0.00729883	-0.0326315	-0.202052	-0.195013	-0.210023	-0.253814	0.900831
ME_MetM1	0.430481	0.231025	-0.523459	0.477094	-0.12469	-0.494089	0.00363756
