# Supplementary material for: Gene-Metabolite Network Analysis Revealed Tissue-Specific Accumulation of Therapeutic Metabolites in Mallotus japonicus
Source: Int J Mol Sci. 2021 Aug 17;22(16):8835. doi: 10.3390/ijms22168835 (PMC8396295; doi:10.3390/ijms22168835)
Supplement: Supplementary file 1 [file ijms-22-08835-s001.zip › Supplementary_Table S7_BLAST_search_result with legend.xlsx]

## Sheet: M_japonica_annotation_top_blast
Table S7 Blastx based annotation result for all the assembled transcripts of Mallotus japonicus
Sequence name	Sequence desc.	Sequence length	Hit desc.	Hit ACC	E-Value	Similarity	Bit-Score	Alignment length	Positives
C727893	hypothetical protein SNOG_03268	198	gi|169600831|ref|XP_001793838.1|hypothetical protein SNOG_03268 [Phaeosphaeria nodorum SN15] gi|160705527|gb|EAT89999.2| hypothetical protein SNOG_03268 [Phaeosphaeria nodorum SN15]	XP_001793838, EAT89999	2.74e-07	79.5455	54.6842	44	35
C727895	---NA---	198	No Blast Hit
C727905	---NA---	198	No Blast Hit
C727911	---NA---	198	No Blast Hit
C727913	---NA---	198	No Blast Hit
C727945	---NA---	198	No Blast Hit
C727947	tir-nbs-lrr resistance protein	198	gi|317106744|dbj|BAJ53239.1|JHS03A10.2 [Jatropha curcas]	BAJ53239	2.97e-11	70.1493	66.6254	67	47
C727963	---NA---	198	No Blast Hit
C727975	vesicle-associated membrane protein	198	gi|154299768|ref|XP_001550302.1|hypothetical protein BC1G_11510 [Botryotinia fuckeliana B05.10] gi|347839232|emb|CCD53804.1| similar to vesicle-associated membrane protein 712 [Botryotinia fuckeliana]	XP_001550302, CCD53804	6.97e-27	95.9184	107.071	49	47
C727981	protocatechuate -	198	gi|398391116|ref|XP_003849018.1|protocatechuate 3,4-dioxygenase, P3,4O [Zymoseptoria tritici IPO323] gi|339468894|gb|EGP83994.1| protocatechuate 3,4-dioxygenase, P3,4O [Zymoseptoria tritici IPO323]	XP_003849018, EGP83994	4.09e-13	82.3529	68.9366	51	42
C727985	---NA---	198	No Blast Hit
C727991	hypothetical protein MELLADRAFT_93284	198	gi|328851288|gb|EGG00444.1|hypothetical protein MELLADRAFT_93284 [Melampsora larici-populina 98AG31]	EGG00444	4.02e-07	57.1429	51.2174	70	40
C727997	---NA---	198	No Blast Hit
C728003	---NA---	198	No Blast Hit
C728023	---NA---	198	No Blast Hit
C728027	aspartic proteinase asp1	198	gi|255563835|ref|XP_002522918.1|nucellin, putative [Ricinus communis] gi|223537845|gb|EEF39461.1| nucellin, putative [Ricinus communis]	XP_002522918, EEF39461	2.38e-24	84.6154	102.064	65	55
C728045	---NA---	198	No Blast Hit
C728047	---NA---	198	No Blast Hit
C728051	---NA---	198	No Blast Hit
C728067	---NA---	198	No Blast Hit
C728075	---NA---	198	No Blast Hit
C728079	---NA---	198	No Blast Hit
C728117	zinc finger	198	gi|255553464|ref|XP_002517773.1|Esterase precursor, putative [Ricinus communis] gi|223543045|gb|EEF44580.1| Esterase precursor, putative [Ricinus communis]	XP_002517773, EEF44580	3.57e-21	82.8125	92.4337	64	53
C728119	---NA---	198	No Blast Hit
C728125	---NA---	198	No Blast Hit
C728131	nematode resistance hs1pro1 protein	198	gi|255571859|ref|XP_002526872.1|conserved hypothetical protein [Ricinus communis] gi|223533771|gb|EEF35503.1| conserved hypothetical protein [Ricinus communis]	XP_002526872, EEF35503	1.97e-29	91.0448	116.316	67	61
C728133	---NA---	198	No Blast Hit
C728139	---NA---	198	No Blast Hit
C728141	---NA---	198	No Blast Hit
C728159	erd4-related membrane protein	198	gi|159473958|ref|XP_001695096.1|ERD4-related membrane protein [Chlamydomonas reinhardtii] gi|158276030|gb|EDP01804.1| ERD4-related membrane protein [Chlamydomonas reinhardtii]	XP_001695096, EDP01804	1.45e-07	70.7692	56.225	65	46
C728163	---NA---	198	No Blast Hit
C728165	n-hydroxycinnamoyl benzoyltransferase	198	gi|255538242|ref|XP_002510186.1|Anthranilate N-benzoyltransferase protein, putative [Ricinus communis] gi|223550887|gb|EEF52373.1| Anthranilate N-benzoyltransferase protein, putative [Ricinus communis]	XP_002510186, EEF52373	3.21e-33	95.3125	126.716	64	61
C728175	---NA---	198	No Blast Hit
C728177	---NA---	198	No Blast Hit
C728183	heat shock protein 70	198	gi|158515354|gb|ABW69475.1|heat shock protein 70 [Trichophyton terrestre]	ABW69475	3.04e-35	100	126.716	64	64
C728189	---NA---	198	No Blast Hit
C728193	serine threonine-protein kinase	198	gi|255564986|ref|XP_002523486.1|serine/threonine-protein kinase cx32, putative [Ricinus communis] gi|223537314|gb|EEF38945.1| serine/threonine-protein kinase cx32, putative [Ricinus communis]	XP_002523486, EEF38945	4.68e-09	63.9344	59.3066	61	39
C728195	---NA---	198	No Blast Hit
C728197	---NA---	198	No Blast Hit
C728201	---NA---	198	No Blast Hit
C728217	---NA---	198	No Blast Hit
C728227	---NA---	198	No Blast Hit
C728233	atp synthase subunit beta	198	gi|402076581|gb|EJT72004.1|ATP synthase subunit beta [Gaeumannomyces graminis var. tritici R3-111a-1]	EJT72004	2.47e-12	90	69.3218	40	36
C728235	cellulose synthase	198	gi|255576874|ref|XP_002529323.1|transferase, putative [Ricinus communis] gi|223531247|gb|EEF33092.1| transferase, putative [Ricinus communis]	XP_002529323, EEF33092	6.95e-33	92.4242	126.716	66	61
C728243	retrotransposon protein	198	gi|54261821|gb|AAV31171.1|Putative polyprotein, identical [Solanum tuberosum]	AAV31171	2.39e-09	75.5556	61.2326	45	34
C728253	porphobilinogen deaminase	198	gi|384251101|gb|EIE24579.1|porphobilinogen deaminase [Coccomyxa subellipsoidea C-169]	EIE24579	2.45e-26	94.9153	107.071	59	56
C728257	rna-binding protein 8a	198	gi|255544924|ref|XP_002513523.1|polyadenylate-binding protein, putative [Ricinus communis] gi|223547431|gb|EEF48926.1| polyadenylate-binding protein, putative [Ricinus communis]	XP_002513523, EEF48926	4.38e-15	88.8889	74.3294	45	40
C728259	---NA---	198	No Blast Hit
C728295	---NA---	198	No Blast Hit
C728303	---NA---	198	No Blast Hit
C728313	---NA---	198	No Blast Hit
C728329	---NA---	198	No Blast Hit
C728349	---NA---	198	No Blast Hit
C728355	---NA---	198	No Blast Hit
C728373	---NA---	198	No Blast Hit
C728383	hypothetical protein HMPREF1120_00776	198	gi|378726106|gb|EHY52565.1|hypothetical protein HMPREF1120_00776 [Exophiala dermatitidis NIH/UT8656]	EHY52565	4.14e-10	66.6667	61.6178	66	44
C728385	---NA---	198	No Blast Hit
C728391	---NA---	198	No Blast Hit
C728393	---NA---	198	No Blast Hit
C728401	fad dependent oxidoreductase	198	gi|90425431|ref|YP_533801.1|FAD dependent oxidoreductase [Rhodopseudomonas palustris BisB18] gi|90107445|gb|ABD89482.1| FAD dependent oxidoreductase [Rhodopseudomonas palustris BisB18]	YP_533801, ABD89482	3.01e-27	83.3333	109.768	66	55
C728403	---NA---	198	No Blast Hit
C728405	---NA---	198	No Blast Hit
C728407	---NA---	198	No Blast Hit
C728413	---NA---	198	No Blast Hit
C728429	---NA---	198	No Blast Hit
C728431	chalcone synthase	198	gi|45535387|emb|CAF04409.1|chalcone synthase [Arabidopsis lyrata subsp. lyrata]	CAF04409	3.94e-37	98.4615	135.191	65	64
C728447	calcium-dependent protein kinase	198	gi|402810034|gb|AFR11237.1|calcium dependent protein kinase 7, partial [Chenopodium album]	AFR11237	1.82e-14	94.2857	74.7146	35	33
C728455	---NA---	198	No Blast Hit
C728457	---NA---	198	No Blast Hit
C728469	---NA---	198	No Blast Hit
C728473	rna binding	198	gi|212531243|ref|XP_002145778.1|RNA binding protein, putative [Penicillium marneffei ATCC 18224] gi|212531245|ref|XP_002145779.1| RNA binding protein, putative [Penicillium marneffei ATCC 18224] gi|210071142|gb|EEA25231.1| RNA binding protein, putative [Penicillium marneffei ATCC 18224] gi|210071143|gb|EEA25232.1| RNA binding protein, putative [Penicillium marneffei ATCC 18224]	XP_002145778, XP_002145779, EEA25231, EEA25232	1.31e-20	78.125	87.4261	64	50
C728479	disease resistance protein	198	gi|255581680|ref|XP_002531643.1|Disease resistance protein RPS2, putative [Ricinus communis] gi|223528728|gb|EEF30739.1| Disease resistance protein RPS2, putative [Ricinus communis]	XP_002531643, EEF30739	6.84e-19	83.3333	88.9669	66	55
C728483	---NA---	198	No Blast Hit
C728491	---NA---	198	No Blast Hit
C728493	---NA---	198	No Blast Hit
C728499	---NA---	198	No Blast Hit
C728509	hypothetical protein VITISV_029829	198	gi|147779660|emb|CAN64955.1|hypothetical protein VITISV_029829 [Vitis vinifera]	CAN64955	4.93e-15	80	77.7962	45	36
C728545	---NA---	198	No Blast Hit
C728551	---NA---	198	No Blast Hit
C728555	---NA---	198	No Blast Hit
C728557	---NA---	198	No Blast Hit
C728561	allergen	198	gi|46135907|ref|XP_389645.1|hypothetical protein FG09469.1 [Gibberella zeae PH-1]	XP_389645	3.52e-19	81.25	87.8113	64	52
C728567	---NA---	198	No Blast Hit
C728573	---NA---	198	No Blast Hit
C728597	---NA---	198	No Blast Hit
C728621	---NA---	198	No Blast Hit
C728631	---NA---	198	No Blast Hit
C728649	membrane organization and biogenesis-related protein	198	gi|321259854|ref|XP_003194647.1|membrane organization and biogenesis-related protein [Cryptococcus gattii WM276] gi|317461119|gb|ADV22860.1| membrane organization and biogenesis-related protein, putative [Cryptococcus gattii WM276]	XP_003194647, ADV22860	1.88e-17	86.5385	80.8777	52	45
C728657	conserved hypothetical protein	198	gi|78033430|emb|CAJ30045.1|conserved hypothetical protein [Magnetospirillum gryphiswaldense MSR-1]	CAJ30045	2.22e-16	79.1045	78.5666	67	53
C728673	---NA---	198	No Blast Hit
C728675	---NA---	198	No Blast Hit
C728681	---NA---	198	No Blast Hit
C728693	hypothetical protein CH063_11575	198	gi|380482447|emb|CCF41234.1|hypothetical protein CH063_11575 [Colletotrichum higginsianum]	CCF41234	5.7e-14	86.3636	72.7886	44	38
C728697	---NA---	198	No Blast Hit
C728703	---NA---	198	No Blast Hit
C728707	---NA---	198	No Blast Hit
C728713	---NA---	198	No Blast Hit
C728715	atp binding	198	gi|255555031|ref|XP_002518553.1|ATP binding protein, putative [Ricinus communis] gi|223542398|gb|EEF43940.1| ATP binding protein, putative [Ricinus communis]	XP_002518553, EEF43940	2.18e-08	77.193	58.151	57	44
C728719	---NA---	198	No Blast Hit
C728731	---NA---	198	No Blast Hit
C728735	---NA---	198	No Blast Hit
C728739	---NA---	198	No Blast Hit
C728751	polysaccharide synthase	198	gi|242824385|ref|XP_002488247.1|polysaccharide synthase Cps1, putative [Talaromyces stipitatus ATCC 10500] gi|218713168|gb|EED12593.1| polysaccharide synthase Cps1, putative [Talaromyces stipitatus ATCC 10500]	XP_002488247, EED12593	2.25e-30	90.7692	118.627	65	59
C728757	---NA---	198	No Blast Hit
C728759	---NA---	198	No Blast Hit
C728797	---NA---	198	No Blast Hit
C728799	---NA---	198	No Blast Hit
C728809	---NA---	198	No Blast Hit
C728835	---NA---	198	No Blast Hit
C728839	atp-binding cassette	198	gi|255577264|ref|XP_002529514.1|ATP-binding cassette transporter, putative [Ricinus communis] gi|223531030|gb|EEF32883.1| ATP-binding cassette transporter, putative [Ricinus communis]	XP_002529514, EEF32883	1.13e-18	78.125	87.8113	64	50
C728841	hypothetical protein PTT_11599	198	gi|330923765|ref|XP_003300365.1|hypothetical protein PTT_11599 [Pyrenophora teres f. teres 0-1] gi|311325522|gb|EFQ91536.1| hypothetical protein PTT_11599 [Pyrenophora teres f. teres 0-1]	XP_003300365, EFQ91536	1.49e-08	96.9231	58.9214	65	63
C728851	---NA---	198	No Blast Hit
C728867	---NA---	198	No Blast Hit
C728875	---NA---	198	No Blast Hit
C728885	---NA---	198	No Blast Hit
C728887	---NA---	198	No Blast Hit
C728893	---NA---	198	No Blast Hit
C728895	---NA---	198	No Blast Hit
C728897	---NA---	198	No Blast Hit
C728899	---NA---	198	No Blast Hit
C728901	---NA---	198	No Blast Hit
C728903	---NA---	198	No Blast Hit
C728915	---NA---	198	No Blast Hit
C728921	---NA---	198	No Blast Hit
C728925	small nuclear ribonucleoprotein	198	gi|396457884|ref|XP_003833555.1|hypothetical protein LEMA_P063160.1 [Leptosphaeria maculans JN3] gi|312210103|emb|CBX90190.1| hypothetical protein LEMA_P063160.1 [Leptosphaeria maculans JN3]	XP_003833555, CBX90190	1.32e-37	100	134.035	65	65
C728929	cytochrome-c oxidase chain viic	198	gi|154292210|ref|XP_001546681.1|cytochrome-c oxidase chain VIIc [Botryotinia fuckeliana B05.10] gi|347842135|emb|CCD56707.1| hypothetical protein [Botryotinia fuckeliana]	XP_001546681, CCD56707	1.03e-26	92.7273	101.679	55	51
C728931	---NA---	198	No Blast Hit
C728935	---NA---	198	No Blast Hit
C728939	---NA---	198	No Blast Hit
C728945	---NA---	198	No Blast Hit
C728947	heat shock protein 90	198	gi|359497780|ref|XP_002277340.2|PREDICTED: heat shock protein 83-like, partial [Vitis vinifera]	XP_002277340	4.13e-28	100	105.145	55	55
C728961	---NA---	198	No Blast Hit
C728965	mitochondrial integral membrane protein	198	gi|330915392|ref|XP_003297012.1|hypothetical protein PTT_07280 [Pyrenophora teres f. teres 0-1] gi|311330545|gb|EFQ94892.1| hypothetical protein PTT_07280 [Pyrenophora teres f. teres 0-1]	XP_003297012, EFQ94892	1.69e-28	89.3939	114.775	66	59
C728977	---NA---	198	No Blast Hit
C728981	---NA---	198	No Blast Hit
C728983	---NA---	198	No Blast Hit
C728987	---NA---	198	No Blast Hit
C728989	glutathione-independent formaldehyde dehydrogenase	198	gi|378726267|gb|EHY52726.1|alcohol dehydrogenase [Exophiala dermatitidis NIH/UT8656]	EHY52726	5.59e-35	98.4615	131.339	65	64
C729001	---NA---	198	No Blast Hit
C729013	---NA---	198	No Blast Hit
C729017	---NA---	198	No Blast Hit
C729029	---NA---	198	No Blast Hit
C729031	alcohol dehydrogenase	198	gi|189205889|ref|XP_001939279.1|alcohol dehydrogenase 1 [Pyrenophora tritici-repentis Pt-1C-BFP] gi|187975372|gb|EDU41998.1| alcohol dehydrogenase 1 [Pyrenophora tritici-repentis Pt-1C-BFP]	XP_001939279, EDU41998	4.99e-19	85.1852	87.0409	54	46
C729033	---NA---	198	No Blast Hit
C729037	hexose transporter	198	gi|307105525|gb|EFN53774.1|hypothetical protein CHLNCDRAFT_136418 [Chlorella variabilis]	EFN53774	7.26e-20	83.871	90.5077	62	52
C729039	---NA---	198	No Blast Hit
C729049	---NA---	198	No Blast Hit
C729055	---NA---	198	No Blast Hit
C729057	---NA---	198	No Blast Hit
C729059	---NA---	198	No Blast Hit
C729063	---NA---	198	No Blast Hit
C729065	---NA---	198	No Blast Hit
C729079	---NA---	198	No Blast Hit
C729085	af478370_1gag-pol polyprotein	198	gi|27901696|gb|AAO26684.1|AF478370_1gag-pol polyprotein [Vitis vinifera]	AAO26684	1.22e-27	87.6923	110.153	65	57
C729087	---NA---	198	No Blast Hit
C729089	hypothetical protein COCSUDRAFT_48360	198	gi|384247181|gb|EIE20668.1|hypothetical protein COCSUDRAFT_48360 [Coccomyxa subellipsoidea C-169]	EIE20668	4.19e-23	83.5616	99.7525	73	61
C729093	---NA---	198	No Blast Hit
C729103	---NA---	198	No Blast Hit
C729105	serine-threonine protein plant-	198	gi|255571730|ref|XP_002526808.1|serine-threonine protein kinase, plant-type, putative [Ricinus communis] gi|223533812|gb|EEF35543.1| serine-threonine protein kinase, plant-type, putative [Ricinus communis]	XP_002526808, EEF35543	4.92e-07	75	54.299	48	36
C729111	---NA---	198	No Blast Hit
C729113	---NA---	198	No Blast Hit
C729127	---NA---	198	No Blast Hit
C729133	---NA---	198	No Blast Hit
C729145	---NA---	198	No Blast Hit
C729153	---NA---	198	No Blast Hit
C729177	---NA---	198	No Blast Hit
C729183	---NA---	198	No Blast Hit
C729197	tir-nbs-lrr resistance protein	198	gi|255562174|ref|XP_002522095.1|hypothetical protein RCOM_1382630 [Ricinus communis] gi|223538694|gb|EEF40295.1| hypothetical protein RCOM_1382630 [Ricinus communis]	XP_002522095, EEF40295	6.89e-29	90.7692	115.161	65	59
C729201	conserved hypothetical protein	198	gi|255557915|ref|XP_002519986.1|conserved hypothetical protein [Ricinus communis] gi|223540750|gb|EEF42310.1| conserved hypothetical protein [Ricinus communis]	XP_002519986, EEF42310	1.75e-08	59.7015	56.6102	67	40
C729217	---NA---	198	No Blast Hit
C729219	calcium calmodulin-dependent protein kinase	198	gi|378729846|gb|EHY56305.1|hypothetical protein HMPREF1120_04390 [Exophiala dermatitidis NIH/UT8656]	EHY56305	9.42e-32	93.8462	124.405	65	61
C729221	---NA---	198	No Blast Hit
C729233	---NA---	198	No Blast Hit
C729237	ubiquitin-40s ribosomal protein s31 fusion protein	198	gi|407916397|gb|EKG09770.1|Ubiquitin, partial [Macrophomina phaseolina MS6]	EKG09770	3.05e-17	100	78.9518	65	65
C729245	---NA---	198	No Blast Hit
C729253	---NA---	198	No Blast Hit
C729257	---NA---	198	No Blast Hit
C729259	bzip transcription factor	198	gi|146323428|ref|XP_754486.2|bZIP transcription factor (AtfA) [Aspergillus fumigatus Af293] gi|129558295|gb|EAL92448.2| bZIP transcription factor (AtfA), putative [Aspergillus fumigatus Af293]	XP_754486, EAL92448	1.62e-14	100	75.485	35	35
C729265	---NA---	198	No Blast Hit
C729267	---NA---	198	No Blast Hit
C729271	---NA---	198	No Blast Hit
C729281	---NA---	198	No Blast Hit
C729283	---NA---	198	No Blast Hit
C729287	udp-glycosyltransferase 85a1-like	198	gi|147841210|emb|CAN68538.1|hypothetical protein VITISV_039646 [Vitis vinifera]	CAN68538	1.03e-16	75	81.2629	60	45
C729293	conserved hypothetical protein	198	gi|255555671|ref|XP_002518871.1|conserved hypothetical protein [Ricinus communis] gi|223541858|gb|EEF43404.1| conserved hypothetical protein [Ricinus communis]	XP_002518871, EEF43404	1.18e-07	61.5385	56.225	65	40
C729295	---NA---	198	No Blast Hit
C729297	disease resistance protein at4g27190-like	198	gi|255563252|ref|XP_002522629.1|Disease resistance protein RPS5, putative [Ricinus communis] gi|223538105|gb|EEF39716.1| Disease resistance protein RPS5, putative [Ricinus communis]	XP_002522629, EEF39716	6.89e-09	62.6866	60.077	67	42
C729305	fatty acid transporter protein	198	gi|398394439|ref|XP_003850678.1|fatty acid transporter protein, partial [Zymoseptoria tritici IPO323] gi|339470557|gb|EGP85654.1| fatty acid transporter protein [Zymoseptoria tritici IPO323]	XP_003850678, EGP85654	1.14e-25	88.8889	107.071	63	56
C729309	glycoside hydrolase family 79 protein	198	gi|358392701|gb|EHK42105.1|glycoside hydrolase family 79 protein [Trichoderma atroviride IMI 206040]	EHK42105	4.23e-10	76.7442	63.1586	43	33
C729311	serine-threonine protein plant-	198	gi|255543643|ref|XP_002512884.1|serine-threonine protein kinase, plant-type, putative [Ricinus communis] gi|223547895|gb|EEF49387.1| serine-threonine protein kinase, plant-type, putative [Ricinus communis]	XP_002512884, EEF49387	1.61e-14	84.6154	75.8702	52	44
C729315	---NA---	198	No Blast Hit
C729317	ankyrin repeat-containing	198	gi|255561248|ref|XP_002521635.1|ankyrin repeat-containing protein, putative [Ricinus communis] gi|223539147|gb|EEF40742.1| ankyrin repeat-containing protein, putative [Ricinus communis]	XP_002521635, EEF40742	5.27e-12	65.1515	68.5514	66	43
C729323	---NA---	198	No Blast Hit
C729325	---NA---	198	No Blast Hit
C729335	---NA---	198	No Blast Hit
C729343	---NA---	198	No Blast Hit
C729345	---NA---	198	No Blast Hit
C729355	---NA---	198	No Blast Hit
C729361	---NA---	198	No Blast Hit
C729375	---NA---	198	No Blast Hit
C729379	---NA---	198	No Blast Hit
C729397	---NA---	198	No Blast Hit
C729403	reverse transcriptase	199	gi|47824970|gb|AAT38744.1|Putative gag-pol polyprotein, identical [Solanum demissum]	AAT38744	6.71e-31	92.4242	123.635	66	61
C729409	---NA---	199	No Blast Hit
C729411	---NA---	199	No Blast Hit
C729417	---NA---	199	No Blast Hit
C729433	---NA---	199	No Blast Hit
C729441	---NA---	199	No Blast Hit
C729451	---NA---	199	No Blast Hit
C729453	---NA---	199	No Blast Hit
C729461	60s ribosomal protein l2	199	gi|296415209|ref|XP_002837284.1|60S ribosomal protein L2 [Tuber melanosporum Mel28] gi|295633145|emb|CAZ81475.1| unnamed protein product [Tuber melanosporum]	XP_002837284, CAZ81475	1.79e-32	93.9394	122.865	66	62
C729465	flavonoid o-methyltransferase related	199	gi|255562992|ref|XP_002522500.1|o-methyltransferase, putative [Ricinus communis] gi|223538191|gb|EEF39800.1| o-methyltransferase, putative [Ricinus communis]	XP_002522500, EEF39800	2.41e-12	88.8889	67.0106	45	40
C729479	---NA---	199	No Blast Hit
C729489	---NA---	199	No Blast Hit
C729507	---NA---	199	No Blast Hit
C729509	---NA---	199	No Blast Hit
C729511	---NA---	199	No Blast Hit
C729523	---NA---	199	No Blast Hit
C729531	---NA---	199	No Blast Hit
C729539	---NA---	199	No Blast Hit
C729551	---NA---	199	No Blast Hit
C729553	proteasome regulatory particle subunit	199	gi|154091378|gb|ABS57490.1|hypothetical protein [Mycosphaerella pini]	ABS57490	1.78e-33	95.4545	127.872	66	63
C729557	---NA---	199	No Blast Hit
C729563	hypothetical protein VITISV_027351	199	gi|147797984|emb|CAN65012.1|hypothetical protein VITISV_027351 [Vitis vinifera]	CAN65012	4.72e-15	82.3529	55.8398	34	28
C729571	---NA---	199	No Blast Hit
C729573	---NA---	199	No Blast Hit
C729589	---NA---	199	No Blast Hit
C729591	---NA---	199	No Blast Hit
C729595	---NA---	199	No Blast Hit
C729597	---NA---	199	No Blast Hit
C729603	malate dehydrogenase	199	gi|396487501|ref|XP_003842656.1|similar to malate dehydrogenase [Leptosphaeria maculans JN3] gi|312219233|emb|CBX99177.1| similar to malate dehydrogenase [Leptosphaeria maculans JN3]	XP_003842656, CBX99177	1.01e-24	89.0909	102.449	55	49
C729609	---NA---	199	No Blast Hit
C729615	---NA---	199	No Blast Hit
C729617	---NA---	199	No Blast Hit
C729621	---NA---	199	No Blast Hit
C729627	---NA---	199	No Blast Hit
C729635	---NA---	199	No Blast Hit
C729639	caffeic acid 3-o-methyltransferase	199	gi|255556786|ref|XP_002519426.1|o-methyltransferase, putative [Ricinus communis] gi|223541289|gb|EEF42840.1| o-methyltransferase, putative [Ricinus communis]	XP_002519426, EEF42840	7.85e-20	80.303	88.9669	66	53
C729649	---NA---	199	No Blast Hit
C729655	---NA---	199	No Blast Hit
C729665	---NA---	199	No Blast Hit
C729667	gag-pol identical	199	gi|147865569|emb|CAN79387.1|hypothetical protein VITISV_000074 [Vitis vinifera]	CAN79387	4.04e-09	69.8113	60.4622	53	37
C729683	---NA---	199	No Blast Hit
C729695	---NA---	199	No Blast Hit
C729703	---NA---	199	No Blast Hit
C729707	---NA---	199	No Blast Hit
C729709	---NA---	199	No Blast Hit
C729711	---NA---	199	No Blast Hit
C729727	ubiquitin extension protein	199	gi|225439342|ref|XP_002270170.1|PREDICTED: ubiquitin-40S ribosomal protein S27a isoform 1 [Vitis vinifera] gi|359481049|ref|XP_003632559.1| PREDICTED: ubiquitin-40S ribosomal protein S27a isoform 2 [Vitis vinifera]	XP_002270170, XP_003632559	2.05e-34	100	124.405	56	56
C729733	---NA---	199	No Blast Hit
C729739	predicted protein	199	gi|396475785|ref|XP_003839870.1|predicted protein [Leptosphaeria maculans JN3] gi|312216440|emb|CBX96391.1| predicted protein [Leptosphaeria maculans JN3]	XP_003839870, CBX96391	2.85e-20	84	87.0409	50	42
C729741	---NA---	199	No Blast Hit
C729743	---NA---	199	No Blast Hit
C729745	---NA---	199	No Blast Hit
C729755	---NA---	199	No Blast Hit
C729757	---NA---	199	No Blast Hit
C729761	---NA---	199	No Blast Hit
C729763	---NA---	199	No Blast Hit
C729773	---NA---	199	No Blast Hit
C729779	protease complex subunit 3	199	gi|18390982|ref|NP_563836.1|ATP-dependent Clp protease proteolytic subunit-related protein 3 [Arabidopsis thaliana] gi|79317437|ref|NP_001031008.1| ATP-dependent Clp protease proteolytic subunit-related protein 3 [Arabidopsis thaliana] gi|75301131|sp|Q8L770.1|CLPR3_ARATH RecName: Full=ATP-dependent Clp protease proteolytic subunit-related protein 3, chloroplastic; Short=ClpR3; AltName: Full=nClpP…	NP_563836, NP_001031008, Q8L770, AAM97107, AAN72143, BAD42886, BAD43080, BAD43100, BAD43530, BAD43620, BAD43621, BAD44208, BAD44354, BAD44355, BAD44477, BAD44534, BAE99296, AEE28397, AEE28398	6.92e-27	89.3939	108.227	66	59
C729783	---NA---	199	No Blast Hit
C729791	---NA---	199	No Blast Hit
C729811	---NA---	199	No Blast Hit
C729825	---NA---	199	No Blast Hit
C729827	---NA---	199	No Blast Hit
C729835	---NA---	199	No Blast Hit
C729843	---NA---	199	No Blast Hit
C729849	---NA---	199	No Blast Hit
C729859	protein	199	gi|224155678|ref|XP_002337626.1|predicted protein [Populus trichocarpa] gi|222839761|gb|EEE78084.1| predicted protein [Populus trichocarpa]	XP_002337626, EEE78084	3.22e-19	77.7778	86.6557	63	49
C729867	---NA---	199	No Blast Hit
C729883	---NA---	199	No Blast Hit
C729885	---NA---	199	No Blast Hit
C729887	---NA---	199	No Blast Hit
C729889	---NA---	199	No Blast Hit
C729893	protein	199	gi|398408818|ref|XP_003855874.1|hypothetical protein MYCGRDRAFT_28809, partial [Zymoseptoria tritici IPO323] gi|339475759|gb|EGP90850.1| hypothetical protein MYCGRDRAFT_28809 [Zymoseptoria tritici IPO323]	XP_003855874, EGP90850	5.58e-22	78.7879	92.4337	66	52
C729899	nbs-lrr resistance protein	199	gi|224145649|ref|XP_002325717.1|nbs-lrr resistance protein [Populus trichocarpa] gi|222862592|gb|EEF00099.1| nbs-lrr resistance protein [Populus trichocarpa]	XP_002325717, EEF00099	5.81e-06	62.5	51.2174	56	35
C729901	---NA---	199	No Blast Hit
C729907	---NA---	199	No Blast Hit
C729917	---NA---	199	No Blast Hit
C729921	---NA---	199	No Blast Hit
C729939	protein	199	gi|105923235|gb|ABF81465.1|TIR-NBS-LRR type disease resistance protein [Populus trichocarpa]	ABF81465	3.95e-14	79.661	75.0998	59	47
C729947	---NA---	199	No Blast Hit
C729949	---NA---	199	No Blast Hit
C729955	---NA---	199	No Blast Hit
C729959	---NA---	199	No Blast Hit
C729963	---NA---	199	No Blast Hit
C729967	---NA---	199	No Blast Hit
C729969	---NA---	199	No Blast Hit
C729975	---NA---	199	No Blast Hit
C729977	u3 small nucleolar rna-associated protein 20-like	199	gi|298205222|emb|CBI17281.3|unnamed protein product [Vitis vinifera]	CBI17281	2.2e-13	83.0189	72.0182	53	44
C729985	---NA---	199	No Blast Hit
C730011	---NA---	199	No Blast Hit
C730013	AC007190_4F23N19.5	199	gi|6630448|gb|AAF19536.1|AC007190_4F23N19.5 [Arabidopsis thaliana]	AAF19536	2.97e-07	55.9322	53.1434	59	33
C730015	---NA---	199	No Blast Hit
C730023	---NA---	199	No Blast Hit
C730059	---NA---	199	No Blast Hit
C730063	---NA---	199	No Blast Hit
C730089	---NA---	199	No Blast Hit
C730115	---NA---	199	No Blast Hit
C730123	---NA---	199	No Blast Hit
C730127	tmv resistance protein n-like	199	gi|255555353|ref|XP_002518713.1|Disease resistance protein RPS2, putative [Ricinus communis] gi|223542094|gb|EEF43638.1| Disease resistance protein RPS2, putative [Ricinus communis]	XP_002518713, EEF43638	8.27e-26	86.3636	108.612	66	57
C730133	---NA---	199	No Blast Hit
C730137	---NA---	199	No Blast Hit
C730153	---NA---	199	No Blast Hit
C730161	---NA---	199	No Blast Hit
C730167	regulator of ribonuclease activity a	199	gi|218191618|gb|EEC74045.1|hypothetical protein OsI_09033 [Oryza sativa Indica Group]	EEC74045	7.74e-24	100	97.4413	46	46
C730175	gamma carbonic anhydrase 1	199	gi|225458239|ref|XP_002282034.1|PREDICTED: uncharacterized protein DDB_G0288155 isoform 2 [Vitis vinifera]	XP_002282034	2.03e-15	86.9565	75.8702	46	40
C730179	3-phosphoglycerate kinase	199	gi|211906450|gb|ACJ11718.1|phosphoglycerate kinase [Gossypium hirsutum]	ACJ11718	4.99e-33	96.9231	125.946	65	63
C730205	---NA---	199	No Blast Hit
C730207	---NA---	199	No Blast Hit
C730231	---NA---	199	No Blast Hit
C730233	---NA---	199	No Blast Hit
C730235	---NA---	199	No Blast Hit
C730243	---NA---	199	No Blast Hit
C730251	---NA---	199	No Blast Hit
C730275	---NA---	199	No Blast Hit
C730277	---NA---	199	No Blast Hit
C730285	---NA---	199	No Blast Hit
C730287	---NA---	199	No Blast Hit
C730295	gamma-interferon-inducible lysosomal thiol reductase	199	gi|225434492|ref|XP_002275283.1|PREDICTED: gamma-interferon-inducible lysosomal thiol reductase isoform 2 [Vitis vinifera] gi|297745847|emb|CBI15903.3| unnamed protein product [Vitis vinifera]	XP_002275283, CBI15903	2.93e-29	89.3939	113.62	66	59
C730299	---NA---	199	No Blast Hit
C730323	---NA---	199	No Blast Hit
C730325	---NA---	199	No Blast Hit
C730329	---NA---	199	No Blast Hit
C730341	---NA---	199	No Blast Hit
C730351	---NA---	199	No Blast Hit
C730359	hypothetical protein HMPREF1120_01643	199	gi|378726991|gb|EHY53450.1|hypothetical protein HMPREF1120_01643 [Exophiala dermatitidis NIH/UT8656]	EHY53450	1.62e-13	84.7458	68.9366	59	50
C730363	---NA---	199	No Blast Hit
C730373	---NA---	199	No Blast Hit
C730389	---NA---	199	No Blast Hit
C730391	---NA---	199	No Blast Hit
C730397	---NA---	199	No Blast Hit
C730403	---NA---	199	No Blast Hit
C730411	---NA---	199	No Blast Hit
C730417	chromodomain-helicase-dna-binding protein 1-like	199	gi|113205323|gb|AAT38747.2|Polyprotein, putative [Solanum demissum]	AAT38747	1.21e-16	72.7273	82.4185	66	48
C730421	hypothetical protein TSTA_040370	199	gi|242805359|ref|XP_002484510.1|hypothetical protein TSTA_040370 [Talaromyces stipitatus ATCC 10500] gi|218715135|gb|EED14557.1| hypothetical protein TSTA_040370 [Talaromyces stipitatus ATCC 10500]	XP_002484510, EED14557	2.3e-22	78.4615	95.5153	65	51
C730429	disease resistance protein	199	gi|255542484|ref|XP_002512305.1|phosphoprotein phosphatase, putative [Ricinus communis] gi|223548266|gb|EEF49757.1| phosphoprotein phosphatase, putative [Ricinus communis]	XP_002512305, EEF49757	3.45e-12	75.8065	69.707	62	47
C730439	---NA---	199	No Blast Hit
C730445	---NA---	199	No Blast Hit
C730447	---NA---	199	No Blast Hit
C730451	---NA---	199	No Blast Hit
C730457	disease resistance protein	199	gi|255571626|ref|XP_002526758.1|Disease resistance protein RGA2, putative [Ricinus communis] gi|223533885|gb|EEF35612.1| Disease resistance protein RGA2, putative [Ricinus communis]	XP_002526758, EEF35612	2.22e-08	66.6667	58.5362	54	36
C730463	---NA---	199	No Blast Hit
C730471	cytochrome b	199	gi|364521114|gb|AEW66871.1|cytochrome b [Melanochelys trijuga]	AEW66871	1.04e-18	79.0323	84.7297	62	49
C730483	---NA---	199	No Blast Hit
C730489	---NA---	199	No Blast Hit
C730491	---NA---	199	No Blast Hit
C730495	en spm-related transposon protein	199	gi|147794504|emb|CAN71609.1|hypothetical protein VITISV_013246 [Vitis vinifera]	CAN71609	1.61e-10	71.4286	59.3066	49	35
C730501	nadh:ubiquinone oxidoreductase subunit	199	gi|398408287|ref|XP_003855609.1|hypothetical protein MYCGRDRAFT_37523, partial [Zymoseptoria tritici IPO323] gi|339475493|gb|EGP90585.1| hypothetical protein MYCGRDRAFT_37523 [Zymoseptoria tritici IPO323]	XP_003855609, EGP90585	6.61e-29	93.2203	107.457	59	55
C730513	---NA---	199	No Blast Hit
C730523	retrotransposon ty3-gypsy subclass	199	gi|147841244|emb|CAN75615.1|hypothetical protein VITISV_010163 [Vitis vinifera]	CAN75615	3.79e-24	86.3636	98.5969	66	57
C730527	hypothetical protein BC1G_10113	199	gi|154301572|ref|XP_001551198.1|hypothetical protein BC1G_10113 [Botryotinia fuckeliana B05.10] gi|347440696|emb|CCD33617.1| hypothetical protein [Botryotinia fuckeliana]	XP_001551198, CCD33617	1.17e-07	80.4878	55.0694	41	33
C730529	retroelement pol polyprotein	199	gi|147784202|emb|CAN66153.1|hypothetical protein VITISV_035131 [Vitis vinifera]	CAN66153	5.44e-11	70	63.5438	50	35
C730533	---NA---	199	No Blast Hit
C730539	heat shock protein	199	gi|357503433|ref|XP_003622005.1|Heat shock protein [Medicago truncatula] gi|355497020|gb|AES78223.1| Heat shock protein [Medicago truncatula]	XP_003622005, AES78223	5.29e-11	67.7966	66.2402	59	40
C730543	---NA---	199	No Blast Hit
C730551	---NA---	199	No Blast Hit
C730555	---NA---	199	No Blast Hit
C730565	---NA---	199	No Blast Hit
C730571	---NA---	199	No Blast Hit
C730577	---NA---	199	No Blast Hit
C730587	---NA---	199	No Blast Hit
C730589	phosphoprotein phosphatase, putative	199	gi|255542484|ref|XP_002512305.1|phosphoprotein phosphatase, putative [Ricinus communis] gi|223548266|gb|EEF49757.1| phosphoprotein phosphatase, putative [Ricinus communis]	XP_002512305, EEF49757	1.66e-08	60.6061	58.9214	66	40
C730593	hypothetical protein MBM_10038	199	gi|406858711|gb|EKD11810.1|hypothetical protein MBM_10038 [Marssonina brunnea f. sp. 'multigermtubi' MB_m1]	EKD11810	9.98e-10	76.5957	60.8474	47	36
C730597	---NA---	199	No Blast Hit
C730603	---NA---	199	No Blast Hit
C730607	---NA---	199	No Blast Hit
C730609	---NA---	199	No Blast Hit
C730611	---NA---	199	No Blast Hit
C730613	---NA---	199	No Blast Hit
C730615	---NA---	199	No Blast Hit
C730635	---NA---	199	No Blast Hit
C730647	---NA---	199	No Blast Hit
C730665	bromodomain-containing protein	199	gi|397638411|gb|EJK73057.1|hypothetical protein THAOC_05344, partial [Thalassiosira oceanica]	EJK73057	1.85e-08	57.1429	55.8398	63	36
C730667	---NA---	199	No Blast Hit
C730673	---NA---	199	No Blast Hit
C730677	---NA---	199	No Blast Hit
C730679	---NA---	199	No Blast Hit
C730697	---NA---	199	No Blast Hit
C730701	---NA---	199	No Blast Hit
C730719	---NA---	199	No Blast Hit
C730723	---NA---	199	No Blast Hit
C730727	---NA---	199	No Blast Hit
C730737	dentin sialophospho protein	199	gi|224134512|ref|XP_002327423.1|predicted protein [Populus trichocarpa] gi|222835977|gb|EEE74398.1| predicted protein [Populus trichocarpa]	XP_002327423, EEE74398	2.34e-09	89.1892	61.2326	37	33
C730739	---NA---	199	No Blast Hit
C730741	---NA---	199	No Blast Hit
C730743	---NA---	199	No Blast Hit
C730745	---NA---	199	No Blast Hit
C730753	---NA---	199	No Blast Hit
C730761	---NA---	199	No Blast Hit
C730767	---NA---	199	No Blast Hit
C730787	---NA---	199	No Blast Hit
C730803	---NA---	199	No Blast Hit
C730807	---NA---	199	No Blast Hit
C730813	---NA---	199	No Blast Hit
C730827	---NA---	199	No Blast Hit
C730831	---NA---	199	No Blast Hit
C730847	---NA---	199	No Blast Hit
C730857	---NA---	199	No Blast Hit
C730863	---NA---	199	No Blast Hit
C730873	---NA---	199	No Blast Hit
C730885	---NA---	199	No Blast Hit
C730895	---NA---	199	No Blast Hit
C730933	---NA---	199	No Blast Hit
C730941	2-deoxyglucose-6-phosphate phosphatase, putative	199	gi|255584279|ref|XP_002532876.1|2-deoxyglucose-6-phosphate phosphatase, putative [Ricinus communis] gi|223527361|gb|EEF29505.1| 2-deoxyglucose-6-phosphate phosphatase, putative [Ricinus communis]	XP_002532876, EEF29505	7.53e-08	74.5098	55.8398	51	38
C730955	---NA---	199	No Blast Hit
C730969	---NA---	199	No Blast Hit
C730977	---NA---	199	No Blast Hit
C730981	---NA---	199	No Blast Hit
C730987	---NA---	199	No Blast Hit
C730989	---NA---	199	No Blast Hit
C730997	alpha beta fold family hydrolase	199	gi|83954714|ref|ZP_00963425.1|hypothetical protein NAS141_15873 [Sulfitobacter sp. NAS-14.1] gi|83840998|gb|EAP80169.1| hypothetical protein NAS141_15873 [Sulfitobacter sp. NAS-14.1]	ZP_00963425, EAP80169	2.44e-20	81.4815	87.8113	54	44
C731013	---NA---	199	No Blast Hit
C731017	---NA---	199	No Blast Hit
C731019	---NA---	199	No Blast Hit
C731021	---NA---	199	No Blast Hit
C731023	---NA---	199	No Blast Hit
C731025	---NA---	199	No Blast Hit
C731037	---NA---	199	No Blast Hit
C731039	antibiotic biosynthesis monooxygenase	199	gi|396473223|ref|XP_003839294.1|similar to antibiotic biosynthesis monooxygenase [Leptosphaeria maculans JN3] gi|312215863|emb|CBX95815.1| similar to antibiotic biosynthesis monooxygenase [Leptosphaeria maculans JN3]	XP_003839294, CBX95815	2.42e-12	81.8182	65.855	44	36
C731045	---NA---	199	No Blast Hit
C731047	---NA---	199	No Blast Hit
C731051	---NA---	199	No Blast Hit
C731053	---NA---	199	No Blast Hit
C731065	---NA---	199	No Blast Hit
C731075	---NA---	200	No Blast Hit
C731081	---NA---	200	No Blast Hit
C731083	60s ribosomal protein l27-a	200	gi|378727325|gb|EHY53784.1|60S ribosomal protein L27-A [Exophiala dermatitidis NIH/UT8656]	EHY53784	2.42e-36	96.9697	128.642	66	64
C731085	---NA---	200	No Blast Hit
C731117	---NA---	200	No Blast Hit
C731123	hypothetical protein VITISV_038689	200	gi|147837070|emb|CAN63637.1|hypothetical protein VITISV_038689 [Vitis vinifera]	CAN63637	2.27e-13	70.4918	72.4034	61	43
C731127	---NA---	200	No Blast Hit
C731133	---NA---	200	No Blast Hit
C731139	---NA---	200	No Blast Hit
C731141	---NA---	200	No Blast Hit
C731163	---NA---	200	No Blast Hit
C731187	---NA---	200	No Blast Hit
C731201	---NA---	200	No Blast Hit
C731237	---NA---	200	No Blast Hit
C731289	---NA---	200	No Blast Hit
C731293	---NA---	200	No Blast Hit
C731295	---NA---	200	No Blast Hit
C731297	hypothetical retrotransposon	200	gi|147780357|emb|CAN59934.1|hypothetical protein VITISV_001876 [Vitis vinifera]	CAN59934	9.98e-13	75	71.2478	60	45
C731299	---NA---	200	No Blast Hit
C731305	---NA---	200	No Blast Hit
C731311	---NA---	200	No Blast Hit
C731313	---NA---	200	No Blast Hit
C731341	---NA---	200	No Blast Hit
C731343	---NA---	200	No Blast Hit
C731345	---NA---	200	No Blast Hit
C731349	---NA---	200	No Blast Hit
C731357	---NA---	200	No Blast Hit
C731359	---NA---	200	No Blast Hit
C731377	---NA---	200	No Blast Hit
C731393	---NA---	200	No Blast Hit
C731399	unnamed protein product	200	gi|309378569|emb|CBX22841.1|unnamed protein product [Neisseria lactamica Y92-1009]	CBX22841	9.14e-08	79.4872	52.373	39	31
C731403	---NA---	200	No Blast Hit
C731409	---NA---	200	No Blast Hit
C731419	---NA---	200	No Blast Hit
C731431	---NA---	200	No Blast Hit
C731441	---NA---	200	No Blast Hit
C731445	---NA---	200	No Blast Hit
C731453	---NA---	200	No Blast Hit
C731457	---NA---	200	No Blast Hit
C731459	---NA---	200	No Blast Hit
C731475	---NA---	200	No Blast Hit
C731479	---NA---	200	No Blast Hit
C731481	---NA---	200	No Blast Hit
C731489	---NA---	200	No Blast Hit
C731499	---NA---	200	No Blast Hit
C731501	---NA---	200	No Blast Hit
C731505	scf ubiquitin ligase complex subunit	200	gi|398391190|ref|XP_003849055.1|hypothetical protein MYCGRDRAFT_76524 [Zymoseptoria tritici IPO323] gi|339468931|gb|EGP84031.1| hypothetical protein MYCGRDRAFT_76524 [Zymoseptoria tritici IPO323]	XP_003849055, EGP84031	2e-16	84.4828	79.7221	58	49
C731507	---NA---	200	No Blast Hit
C731517	---NA---	200	No Blast Hit
C731519	---NA---	200	No Blast Hit
C731527	---NA---	200	No Blast Hit
C731537	---NA---	200	No Blast Hit
C731555	---NA---	200	No Blast Hit
C731561	---NA---	200	No Blast Hit
C731565	---NA---	200	No Blast Hit
C731569	---NA---	200	No Blast Hit
C731577	---NA---	200	No Blast Hit
C731583	---NA---	200	No Blast Hit
C731593	---NA---	200	No Blast Hit
C731617	---NA---	200	No Blast Hit
C731621	---NA---	200	No Blast Hit
C731629	---NA---	200	No Blast Hit
C731633	---NA---	200	No Blast Hit
C731635	---NA---	200	No Blast Hit
C731637	---NA---	200	No Blast Hit
C731675	atp synthase subunit beta	200	gi|380488786|emb|CCF37141.1|ATP synthase subunit beta [Colletotrichum higginsianum]	CCF37141	2.61e-21	95.7447	94.7449	47	45
C731687	---NA---	200	No Blast Hit
C731699	---NA---	200	No Blast Hit
C731701	---NA---	200	No Blast Hit
C731707	---NA---	200	No Blast Hit
C731719	glyceraldehyde-3-phosphate partial	200	gi|151368249|gb|ABS10830.1|glyceraldehyde-3-phosphate dehydrogenase, partial [Ramalina menziesii] gi|151368251|gb|ABS10831.1| glyceraldehyde-3-phosphate dehydrogenase, partial [Ramalina menziesii] gi|151368253|gb|ABS10832.1| glyceraldehyde-3-phosphate dehydrogenase, partial [Ramalina menziesii] gi|151368255|gb|ABS10833.1| glyceraldehyde-3-phosphate dehydrogenase, partial [Ramalina menziesii]	ABS10830, ABS10831, ABS10832, ABS10833	1.35e-37	98.4848	133.65	66	65
C731723	---NA---	200	No Blast Hit
C731727	malate nad-dependent	200	gi|189190548|ref|XP_001931613.1|malate dehydrogenase [Pyrenophora tritici-repentis Pt-1C-BFP] gi|187973219|gb|EDU40718.1| malate dehydrogenase [Pyrenophora tritici-repentis Pt-1C-BFP]	XP_001931613, EDU40718	1.13e-28	93.9394	113.235	66	62
C731739	---NA---	200	No Blast Hit
C731745	---NA---	200	No Blast Hit
C731755	---NA---	200	No Blast Hit
C731765	cyanovirin-n family protein	200	gi|346979881|gb|EGY23333.1|hypothetical protein VDAG_04771 [Verticillium dahliae VdLs.17]	EGY23333	5.15e-07	63.2353	51.6026	68	43
C731771	---NA---	200	No Blast Hit
C731775	---NA---	200	No Blast Hit
C731785	---NA---	200	No Blast Hit
C731805	tir-nbs-lrr-tir type disease resistance protein	200	gi|28371831|gb|AAO38214.1|RCa2 [Manihot esculenta]	AAO38214	1.04e-32	93.9394	121.709	66	62
C731813	---NA---	200	No Blast Hit
C731815	leucine-rich repeat receptor protein kinase exs-like	200	gi|255547580|ref|XP_002514847.1|serine/threonine-protein kinase bri1, putative [Ricinus communis] gi|223545898|gb|EEF47401.1| serine/threonine-protein kinase bri1, putative [Ricinus communis]	XP_002514847, EEF47401	1.99e-20	80.303	93.2041	66	53
C731819	---NA---	200	No Blast Hit
C731827	polyprotein (retrotrasposon protein)	200	gi|359487104|ref|XP_002274088.2|PREDICTED: uncharacterized protein LOC100259102 [Vitis vinifera]	XP_002274088	4.35e-12	80.4878	58.9214	41	33
C731841	---NA---	200	No Blast Hit
C731853	---NA---	200	No Blast Hit
C731877	---NA---	200	No Blast Hit
C731881	---NA---	200	No Blast Hit
C731887	---NA---	200	No Blast Hit
C731897	---NA---	200	No Blast Hit
C731901	nodulin 21 -like transporter family protein	200	gi|255552658|ref|XP_002517372.1|Auxin-induced protein 5NG4, putative [Ricinus communis] gi|223543383|gb|EEF44914.1| Auxin-induced protein 5NG4, putative [Ricinus communis]	XP_002517372, EEF44914	1.88e-10	69.2308	63.5438	65	45
C731907	---NA---	200	No Blast Hit
C731917	---NA---	200	No Blast Hit
C731923	---NA---	200	No Blast Hit
C731933	---NA---	200	No Blast Hit
C731949	extracellular serine-rich protein	200	gi|336467881|gb|EGO56044.1|hypothetical protein NEUTE1DRAFT_82983 [Neurospora tetrasperma FGSC 2508] gi|350289882|gb|EGZ71107.1| Cupredoxin [Neurospora tetrasperma FGSC 2509]	EGO56044, EGZ71107	2.81e-16	86.0465	78.1814	43	37
C731955	---NA---	200	No Blast Hit
C731957	---NA---	200	No Blast Hit
C731961	---NA---	200	No Blast Hit
C731971	---NA---	200	No Blast Hit
C731975	---NA---	200	No Blast Hit
C731985	---NA---	200	No Blast Hit
C731995	---NA---	200	No Blast Hit
C732009	---NA---	200	No Blast Hit
C732015	---NA---	200	No Blast Hit
C732043	---NA---	200	No Blast Hit
C732053	---NA---	200	No Blast Hit
C732061	---NA---	200	No Blast Hit
C732067	---NA---	200	No Blast Hit
C732073	---NA---	200	No Blast Hit
C732077	---NA---	200	No Blast Hit
C732083	---NA---	200	No Blast Hit
C732089	---NA---	200	No Blast Hit
C732095	---NA---	200	No Blast Hit
C732109	---NA---	200	No Blast Hit
C732115	---NA---	200	No Blast Hit
C732117	---NA---	200	No Blast Hit
C732121	---NA---	200	No Blast Hit
C732129	---NA---	200	No Blast Hit
C732135	---NA---	200	No Blast Hit
C732147	---NA---	200	No Blast Hit
C732157	---NA---	200	No Blast Hit
C732165	retrotransposon ty1-copia subclass	200	gi|147770131|emb|CAN76612.1|hypothetical protein VITISV_040104 [Vitis vinifera]	CAN76612	8.63e-17	87.6923	77.7962	65	57
C732205	---NA---	200	No Blast Hit
C732213	---NA---	200	No Blast Hit
C732221	---NA---	200	No Blast Hit
C732223	gag-pol polyprotein	200	gi|147818439|emb|CAN60732.1|hypothetical protein VITISV_010209 [Vitis vinifera]	CAN60732	2.67e-24	90	104.76	60	54
C732237	---NA---	200	No Blast Hit
C732241	66 kda stress protein	200	gi|255580485|ref|XP_002531068.1|WD-repeat protein, putative [Ricinus communis] gi|223529363|gb|EEF31329.1| WD-repeat protein, putative [Ricinus communis]	XP_002531068, EEF31329	1.55e-17	86.2745	77.7962	51	44
C732253	allergen	200	gi|407926631|gb|EKG19598.1|hypothetical protein MPH_03462 [Macrophomina phaseolina MS6]	EKG19598	5.63e-25	83.3333	102.064	66	55
C732255	translation elongation factor 1a	200	gi|47123372|gb|AAH70131.1|EEF1A1 protein [Homo sapiens]	AAH70131	5.13e-36	93.9394	127.102	66	62
C732257	translationally-controlled tumor protein	200	gi|367050858|ref|XP_003655808.1|hypothetical protein THITE_2119921 [Thielavia terrestris NRRL 8126] gi|347003072|gb|AEO69472.1| hypothetical protein THITE_2119921 [Thielavia terrestris NRRL 8126]	XP_003655808, AEO69472	3.14e-27	83.3333	106.301	66	55
C732267	atp synthase subunit alpha	200	gi|396472469|ref|XP_003839122.1|similar to ATP synthase subunit alpha [Leptosphaeria maculans JN3] gi|312215691|emb|CBX95643.1| similar to ATP synthase subunit alpha [Leptosphaeria maculans JN3]	XP_003839122, CBX95643	2.5e-37	100	138.658	66	66
C732269	---NA---	200	No Blast Hit
C732279	---NA---	200	No Blast Hit
C732293	---NA---	200	No Blast Hit
C732297	---NA---	200	No Blast Hit
C732301	l-xylulose reductase	200	gi|320589034|gb|EFX01502.1|sorbitol xylulose reductase [Grosmannia clavigera kw1407]	EFX01502	2.46e-26	84.8485	105.916	66	56
C732303	---NA---	200	No Blast Hit
C732305	aspartic endopeptidase pep2	200	gi|407924694|gb|EKG17726.1|Peptidase A1 [Macrophomina phaseolina MS6]	EKG17726	2.11e-16	92.8571	79.7221	42	39
C732315	---NA---	200	No Blast Hit
C732317	---NA---	200	No Blast Hit
C732329	---NA---	200	No Blast Hit
C732331	---NA---	200	No Blast Hit
C732343	---NA---	200	No Blast Hit
C732349	---NA---	200	No Blast Hit
C732353	---NA---	200	No Blast Hit
C732367	Phytoene dehydrogenase, putative	200	gi|255560501|ref|XP_002521265.1|Phytoene dehydrogenase, putative [Ricinus communis] gi|223539533|gb|EEF41121.1| Phytoene dehydrogenase, putative [Ricinus communis]	XP_002521265, EEF41121	5.78e-08	75	56.9954	36	27
C732383	---NA---	200	No Blast Hit
C732403	---NA---	200	No Blast Hit
C732405	---NA---	200	No Blast Hit
C732417	---NA---	200	No Blast Hit
C732419	---NA---	200	No Blast Hit
C732431	---NA---	200	No Blast Hit
C732435	beta-glucosidase g4	200	gi|317106642|dbj|BAJ53147.1|JHL23J11.2 [Jatropha curcas]	BAJ53147	2.28e-14	93.0233	75.0998	43	40
C732439	---NA---	200	No Blast Hit
C732451	---NA---	200	No Blast Hit
C732455	---NA---	200	No Blast Hit
C732481	inorganic pyrophosphatase	200	gi|171696162|ref|XP_001913005.1|hypothetical protein [Podospora anserina S mat+] gi|170948323|emb|CAP60487.1| unnamed protein product [Podospora anserina S mat+]	XP_001913005, CAP60487	2.45e-40	98.4848	144.05	66	65
C732483	---NA---	200	No Blast Hit
C732487	---NA---	200	No Blast Hit
C732489	---NA---	200	No Blast Hit
C732491	protein disulfide isomerase	200	gi|224084900|ref|XP_002307440.1|predicted protein [Populus trichocarpa] gi|222856889|gb|EEE94436.1| predicted protein [Populus trichocarpa]	XP_002307440, EEE94436	4.34e-17	87.8788	82.8037	66	58
C732495	---NA---	200	No Blast Hit
C732501	---NA---	200	No Blast Hit
C732507	---NA---	200	No Blast Hit
C732527	---NA---	200	No Blast Hit
C732529	tir-nbs-lrr resistance protein	200	gi|255562174|ref|XP_002522095.1|hypothetical protein RCOM_1382630 [Ricinus communis] gi|223538694|gb|EEF40295.1| hypothetical protein RCOM_1382630 [Ricinus communis]	XP_002522095, EEF40295	2.59e-16	82.1429	80.4925	56	46
C732533	---NA---	200	No Blast Hit
C732543	---NA---	200	No Blast Hit
C732547	---NA---	200	No Blast Hit
C732551	---NA---	200	No Blast Hit
C732559	---NA---	200	No Blast Hit
C732571	---NA---	200	No Blast Hit
C732599	---NA---	200	No Blast Hit
C732601	---NA---	200	No Blast Hit
C732613	---NA---	201	No Blast Hit
C732615	---NA---	201	No Blast Hit
C732629	---NA---	201	No Blast Hit
C732633	af478379_1gag-pol polyprotein	201	gi|147810492|emb|CAN76556.1|hypothetical protein VITISV_034790 [Vitis vinifera]	CAN76556	3.86e-07	71.2121	54.299	66	47
C732635	---NA---	201	No Blast Hit
C732643	14-3-3 family protein	201	gi|164427149|ref|XP_964477.2|DNA damage checkpoint protein rad24 [Neurospora crassa OR74A] gi|157071627|gb|EAA35241.2| DNA damage checkpoint protein rad24 [Neurospora crassa OR74A]	XP_964477, EAA35241	4.19e-41	100	140.969	67	67
C732651	---NA---	201	No Blast Hit
C732653	---NA---	201	No Blast Hit
C732657	---NA---	201	No Blast Hit
C732659	---NA---	201	No Blast Hit
C732675	---NA---	201	No Blast Hit
C732681	60s ribosomal protein l7a	201	gi|62318663|dbj|BAD95148.1|60S ribosomal protein L7A [Arabidopsis thaliana]	BAD95148	7.78e-38	95.5224	130.954	67	64
C732685	---NA---	201	No Blast Hit
C732711	---NA---	201	No Blast Hit
C732725	opsin 1	201	gi|378725586|gb|EHY52045.1|bacteriorhodopsin [Exophiala dermatitidis NIH/UT8656]	EHY52045	5.97e-28	92.4242	110.923	66	61
C732737	---NA---	201	No Blast Hit
C732739	---NA---	201	No Blast Hit
C732741	---NA---	201	No Blast Hit
C732743	---NA---	201	No Blast Hit
C732751	---NA---	201	No Blast Hit
C732753	---NA---	201	No Blast Hit
C732755	---NA---	201	No Blast Hit
C732759	---NA---	201	No Blast Hit
C732769	---NA---	201	No Blast Hit
C732771	---NA---	201	No Blast Hit
C732775	---NA---	201	No Blast Hit
C732777	anthranilate n-benzoyltransferase	201	gi|255587870|ref|XP_002534423.1|Anthranilate N-benzoyltransferase protein, putative [Ricinus communis] gi|223525320|gb|EEF27961.1| Anthranilate N-benzoyltransferase protein, putative [Ricinus communis]	XP_002534423, EEF27961	9.9e-22	75.7576	95.1301	66	50
C732779	---NA---	201	No Blast Hit
C732785	adenylosuccinate lyase-like	201	gi|255579132|ref|XP_002530414.1|adenylosuccinate lyase, putative [Ricinus communis] gi|223530063|gb|EEF31984.1| adenylosuccinate lyase, putative [Ricinus communis]	XP_002530414, EEF31984	5.49e-27	89.3939	109.383	66	59
C732787	---NA---	201	No Blast Hit
C732799	---NA---	201	No Blast Hit
C732805	---NA---	201	No Blast Hit
C732813	---NA---	201	No Blast Hit
C732845	sugar transporter	201	gi|398407451|ref|XP_003855191.1|putative STL major facilitator superfamily sugar transporter, partial [Zymoseptoria tritici IPO323] gi|339475075|gb|EGP90167.1| putative STL major facilitator superfamily sugar transporter [Zymoseptoria tritici IPO323]	XP_003855191, EGP90167	3.29e-30	90.9091	118.242	66	60
C732865	---NA---	201	No Blast Hit
C732871	ubiquitin-protein ligase	201	gi|255586762|ref|XP_002534000.1|ubiquitin-protein ligase, putative [Ricinus communis] gi|223526002|gb|EEF28381.1| ubiquitin-protein ligase, putative [Ricinus communis]	XP_002534000, EEF28381	9.61e-16	69.863	79.7221	73	51
C732883	---NA---	201	No Blast Hit
C732887	---NA---	201	No Blast Hit
C732891	---NA---	201	No Blast Hit
C732893	phosphatidylinositol 3-kinase	201	gi|74418637|gb|ABA03135.1|phosphatidylinositol 3-kinase 1 [Phaseolus vulgaris]	ABA03135	3.25e-35	93.9394	134.806	66	62
C732917	atpase beta subunit	201	gi|399573409|gb|AFP48947.1|ATP synthase beta-subunit, partial [Xiphias gladius]	AFP48947	4.12e-36	98.4848	127.102	66	65
C732925	---NA---	201	No Blast Hit
C732927	---NA---	201	No Blast Hit
C732939	---NA---	201	No Blast Hit
C732945	hat dimerisation domain-containing	201	gi|356513789|ref|XP_003525592.1|PREDICTED: uncharacterized protein LOC100796054 [Glycine max]	XP_003525592	7.5e-18	81.8182	83.1889	55	45
C732951	---NA---	201	No Blast Hit
C732957	---NA---	201	No Blast Hit
C732965	---NA---	201	No Blast Hit
C732967	---NA---	201	No Blast Hit
C732971	---NA---	201	No Blast Hit
C732977	dead box atp-dependent rna	201	gi|255558388|ref|XP_002520221.1|dead box ATP-dependent RNA helicase, putative [Ricinus communis] gi|223540713|gb|EEF42276.1| dead box ATP-dependent RNA helicase, putative [Ricinus communis]	XP_002520221, EEF42276	6.2e-07	82.8571	53.9138	35	29
C732979	---NA---	201	No Blast Hit
C732981	---NA---	201	No Blast Hit
C732993	---NA---	201	No Blast Hit
C733001	---NA---	201	No Blast Hit
C733007	dienelactone hydrolase family protein	201	gi|398398563|ref|XP_003852739.1|hypothetical protein MYCGRDRAFT_58686 [Zymoseptoria tritici IPO323] gi|339472620|gb|EGP87715.1| hypothetical protein MYCGRDRAFT_58686 [Zymoseptoria tritici IPO323]	XP_003852739, EGP87715	4.54e-29	84.8485	112.849	66	56
C733031	---NA---	201	No Blast Hit
C733041	---NA---	201	No Blast Hit
C733047	---NA---	201	No Blast Hit
C733059	---NA---	201	No Blast Hit
C733061	---NA---	201	No Blast Hit
C733071	---NA---	201	No Blast Hit
C733073	protein	201	gi|224100293|ref|XP_002334388.1|predicted protein [Populus trichocarpa] gi|222871914|gb|EEF09045.1| predicted protein [Populus trichocarpa]	XP_002334388, EEF09045	6.76e-31	88.0597	118.627	67	59
C733079	---NA---	201	No Blast Hit
C733111	---NA---	201	No Blast Hit
C733113	---NA---	201	No Blast Hit
C733127	---NA---	201	No Blast Hit
C733129	---NA---	201	No Blast Hit
C733131	---NA---	201	No Blast Hit
C733147	---NA---	201	No Blast Hit
C733153	---NA---	201	No Blast Hit
C733159	hypothetical retrotransposon	201	gi|1167523|dbj|BAA11674.1|unnamed protein product [Nicotiana tabacum]	BAA11674	8.35e-36	92.5373	137.502	67	62
C733167	---NA---	201	No Blast Hit
C733177	---NA---	201	No Blast Hit
C733185	---NA---	201	No Blast Hit
C733199	nadh:ubiquinone oxidoreductase subunit	201	gi|378730093|gb|EHY56552.1|hypothetical protein HMPREF1120_04630 [Exophiala dermatitidis NIH/UT8656]	EHY56552	8.98e-22	83.0508	89.3521	59	49
C733201	---NA---	201	No Blast Hit
C733203	---NA---	201	No Blast Hit
C733205	60s ribosomal protein l1	201	gi|154320003|ref|XP_001559318.1|60S ribosomal protein L1 [Botryotinia fuckeliana B05.10] gi|347828301|emb|CCD43998.1| similar to 60s ribosomal protein L10A [Botryotinia fuckeliana]	XP_001559318, CCD43998	2.15e-24	96.9697	99.7525	66	64
C733207	---NA---	201	No Blast Hit
C733217	---NA---	201	No Blast Hit
C733223	---NA---	201	No Blast Hit
C733227	ycf2	201	gi|224158240|ref|XP_002337949.1|predicted protein [Populus trichocarpa] gi|222870061|gb|EEF07192.1| predicted protein [Populus trichocarpa]	XP_002337949, EEF07192	5.2e-26	91.0714	106.301	56	51
C733233	---NA---	201	No Blast Hit
C733235	---NA---	201	No Blast Hit
C733253	---NA---	201	No Blast Hit
C733259	---NA---	201	No Blast Hit
C733261	---NA---	201	No Blast Hit
C733267	---NA---	201	No Blast Hit
C733273	40s ribosomal protein s14	201	gi|413943333|gb|AFW75982.1|hypothetical protein ZEAMMB73_248650 [Zea mays]	AFW75982	2.47e-27	100	104.375	66	66
C733275	---NA---	201	No Blast Hit
C733287	---NA---	201	No Blast Hit
C733297	transcription factor	201	gi|297745334|emb|CBI40414.3|unnamed protein product [Vitis vinifera]	CBI40414	5.91e-11	64.0625	65.0846	64	41
C733303	hypothetical protein RCOM_1238660	201	gi|255582199|ref|XP_002531892.1|hypothetical protein RCOM_1238660 [Ricinus communis] gi|223528459|gb|EEF30491.1| hypothetical protein RCOM_1238660 [Ricinus communis]	XP_002531892, EEF30491	1.1e-22	76.1194	92.8189	67	51
C733319	---NA---	201	No Blast Hit
C733321	---NA---	201	No Blast Hit
C733323	---NA---	201	No Blast Hit
C733329	---NA---	201	No Blast Hit
C733337	---NA---	201	No Blast Hit
C733339	at4g35360 f23e12_80	201	gi|224102773|ref|XP_002312796.1|predicted protein [Populus trichocarpa] gi|222849204|gb|EEE86751.1| predicted protein [Populus trichocarpa]	XP_002312796, EEE86751	9.29e-09	78.9474	58.5362	38	30
C733347	---NA---	201	No Blast Hit
C733353	---NA---	201	No Blast Hit
C733361	---NA---	201	No Blast Hit
C733365	---NA---	201	No Blast Hit
C733373	protein	201	gi|255555125|ref|XP_002518600.1|S-locus-specific glycoprotein S13 precursor, putative [Ricinus communis] gi|223542445|gb|EEF43987.1| S-locus-specific glycoprotein S13 precursor, putative [Ricinus communis]	XP_002518600, EEF43987	6.65e-32	92.1875	125.561	64	59
C733375	---NA---	201	No Blast Hit
C733391	---NA---	201	No Blast Hit
C733395	---NA---	201	No Blast Hit
C733403	---NA---	201	No Blast Hit
C733413	---NA---	201	No Blast Hit
C733425	---NA---	201	No Blast Hit
C733431	---NA---	201	No Blast Hit
C733485	---NA---	201	No Blast Hit
C733487	amino acid	201	gi|406863633|gb|EKD16680.1|transketolase [Marssonina brunnea f. sp. 'multigermtubi' MB_m1]	EKD16680	5.09e-16	83.3333	80.8777	66	55
C733491	dessication-associated protein	201	gi|386857557|ref|YP_006261734.1|Dessication-associated protein [Deinococcus gobiensis I-0] gi|380001086|gb|AFD26276.1| Dessication-associated protein [Deinococcus gobiensis I-0]	YP_006261734, AFD26276	1.19e-14	68.6567	74.3294	67	46
C733495	---NA---	201	No Blast Hit
C733503	---NA---	201	No Blast Hit
C733505	---NA---	201	No Blast Hit
C733509	---NA---	201	No Blast Hit
C733513	gag-pol polyprotein	201	gi|38194929|gb|AAR13317.1|gag-pol polyprotein [Phaseolus vulgaris]	AAR13317	5.01e-14	74.2424	75.0998	66	49
C733515	---NA---	201	No Blast Hit
C733523	---NA---	201	No Blast Hit
C733531	---NA---	201	No Blast Hit
C733539	---NA---	201	No Blast Hit
C733543	---NA---	201	No Blast Hit
C733551	---NA---	201	No Blast Hit
C733557	---NA---	201	No Blast Hit
C733591	---NA---	201	No Blast Hit
C733593	---NA---	201	No Blast Hit
C733627	---NA---	201	No Blast Hit
C733633	---NA---	201	No Blast Hit
C733639	---NA---	201	No Blast Hit
C733659	---NA---	201	No Blast Hit
C733661	---NA---	201	No Blast Hit
C733667	---NA---	201	No Blast Hit
C733701	---NA---	201	No Blast Hit
C733707	---NA---	201	No Blast Hit
C733723	---NA---	201	No Blast Hit
C733727	---NA---	201	No Blast Hit
C733729	---NA---	201	No Blast Hit
C733739	---NA---	201	No Blast Hit
C733741	---NA---	201	No Blast Hit
C733755	---NA---	201	No Blast Hit
C733757	alcohol oxidase	201	gi|9082281|gb|AAF82788.1|AF275346_1alcohol oxidase [Passalora fulva]	AAF82788	7.59e-18	95.1613	85.5001	62	59
C733759	---NA---	201	No Blast Hit
C733785	---NA---	201	No Blast Hit
C733789	at3g17240-like partial	201	gi|345290881|gb|AEN81932.1|AT3G17240-like protein, partial [Capsella grandiflora] gi|345290885|gb|AEN81934.1| AT3G17240-like protein, partial [Capsella grandiflora] gi|345290887|gb|AEN81935.1| AT3G17240-like protein, partial [Capsella grandiflora] gi|345290889|gb|AEN81936.1| AT3G17240-like protein, partial [Capsella grandiflora] gi|345290891|gb|AEN81937.1| AT3G17240-like protein, partial [Capsell…	AEN81932, AEN81934, AEN81935, AEN81936, AEN81937, AEN81938, AEN81939, AEN81940, AEN81941, AEN81942, AEN81943	2e-35	96.9697	127.102	66	64
C733799	---NA---	201	No Blast Hit
C733821	---NA---	201	No Blast Hit
C733829	---NA---	201	No Blast Hit
C733833	---NA---	201	No Blast Hit
C733855	---NA---	201	No Blast Hit
C733867	atp synthase beta mitochondrial precursor	201	gi|169597039|ref|XP_001791943.1|hypothetical protein SNOG_01298 [Phaeosphaeria nodorum SN15] gi|160707434|gb|EAT90947.2| hypothetical protein SNOG_01298 [Phaeosphaeria nodorum SN15]	XP_001791943, EAT90947	2.47e-34	93.9394	129.413	66	62
C733875	---NA---	201	No Blast Hit
C733895	hypothetical protein VITISV_037415	201	gi|147842128|emb|CAN78096.1|hypothetical protein VITISV_037415 [Vitis vinifera]	CAN78096	1.11e-19	92.3077	72.0182	39	36
C733903	protein	201	gi|302418554|ref|XP_003007108.1|predicted protein [Verticillium albo-atrum VaMs.102] gi|261354710|gb|EEY17138.1| predicted protein [Verticillium albo-atrum VaMs.102]	XP_003007108, EEY17138	1.73e-10	78.0488	60.077	41	32
C733911	---NA---	201	No Blast Hit
C733913	---NA---	201	No Blast Hit
C733925	photosystem ii protein d2	201	gi|7524799|ref|NP_045801.1|photosystem II protein D2 [Chlorella vulgaris] gi|3024458|sp|P56319.1|PSBD_CHLVU RecName: Full=Photosystem II D2 protein; Short=PSII D2 protein; AltName: Full=Photosystem Q(A) protein gi|2224392|dbj|BAA57876.1| photosystem II D2 protein [Chlorella vulgaris]	NP_045801, P56319, BAA57876	4.6e-27	100	108.997	49	49
C733927	hypothetical protein MTR_1g063980	201	gi|357440373|ref|XP_003590464.1|hypothetical protein MTR_1g063980 [Medicago truncatula] gi|355479512|gb|AES60715.1| hypothetical protein MTR_1g063980 [Medicago truncatula]	XP_003590464, AES60715	2.7e-14	75.7576	72.7886	66	50
C733933	---NA---	201	No Blast Hit
C733947	cchc-type integrase	201	gi|109676362|gb|ABG37663.1|CCHC-type integrase [Populus trichocarpa]	ABG37663	1.28e-12	79.2453	70.8626	53	42
C733949	---NA---	201	No Blast Hit
C733965	---NA---	201	No Blast Hit
C733979	hypothetical protein VITISV_023048	201	gi|147820341|emb|CAN60902.1|hypothetical protein VITISV_023048 [Vitis vinifera]	CAN60902	1.98e-16	71.4286	81.2629	63	45
C733981	transcriptional regulator	201	gi|255558982|ref|XP_002520514.1|Transcriptional regulator SUPERMAN, putative [Ricinus communis] gi|223540356|gb|EEF41927.1| Transcriptional regulator SUPERMAN, putative [Ricinus communis]	XP_002520514, EEF41927	1.08e-09	82.3529	59.3066	34	28
C733985	---NA---	201	No Blast Hit
C733993	14-3-3 protein	201	gi|361131506|gb|EHL03179.1|putative 14-3-3 protein like protein [Glarea lozoyensis 74030]	EHL03179	8.15e-40	100	141.354	66	66
C733997	---NA---	201	No Blast Hit
C733999	---NA---	201	No Blast Hit
C734029	---NA---	201	No Blast Hit
C734041	---NA---	201	No Blast Hit
C734063	---NA---	201	No Blast Hit
C734079	---NA---	201	No Blast Hit
C734081	---NA---	201	No Blast Hit
C734087	cellulose synthase-like protein g2-like	201	gi|255576870|ref|XP_002529321.1|cellulose synthase, putative [Ricinus communis] gi|223531245|gb|EEF33090.1| cellulose synthase, putative [Ricinus communis]	XP_002529321, EEF33090	2.24e-23	81.8182	101.293	66	54
C734097	---NA---	201	No Blast Hit
C734103	---NA---	201	No Blast Hit
C734105	---NA---	201	No Blast Hit
C734107	---NA---	201	No Blast Hit
C734129	---NA---	201	No Blast Hit
C734133	protein	201	gi|224145829|ref|XP_002325779.1|predicted protein [Populus trichocarpa] gi|222862654|gb|EEF00161.1| predicted protein [Populus trichocarpa]	XP_002325779, EEF00161	2.21e-17	77.6119	83.9593	67	52
C734161	---NA---	202	No Blast Hit
C734165	---NA---	202	No Blast Hit
C734167	---NA---	202	No Blast Hit
C734171	---NA---	202	No Blast Hit
C734213	---NA---	202	No Blast Hit
C734241	---NA---	202	No Blast Hit
C734255	---NA---	202	No Blast Hit
C734279	---NA---	202	No Blast Hit
C734281	protein	202	gi|224120912|ref|XP_002318450.1|predicted protein [Populus trichocarpa] gi|222859123|gb|EEE96670.1| predicted protein [Populus trichocarpa]	XP_002318450, EEE96670	3.83e-15	78.7879	77.7962	66	52
C734283	---NA---	202	No Blast Hit
C734295	---NA---	202	No Blast Hit
C734301	---NA---	202	No Blast Hit
C734307	---NA---	202	No Blast Hit
C734309	60s ribosomal protein	202	gi|351723535|ref|NP_001238050.1|uncharacterized protein LOC100305619 [Glycine max] gi|255626107|gb|ACU13398.1| unknown [Glycine max]	NP_001238050, ACU13398	1.26e-29	100	113.62	55	55
C734313	translocon-associated protein trap alpha subunit	202	gi|384249777|gb|EIE23258.1|hypothetical protein COCSUDRAFT_53555 [Coccomyxa subellipsoidea C-169]	EIE23258	2.33e-09	58.209	59.3066	67	39
C734325	---NA---	202	No Blast Hit
C734343	---NA---	202	No Blast Hit
C734345	protein	202	gi|224120552|ref|XP_002318358.1|predicted protein [Populus trichocarpa] gi|222859031|gb|EEE96578.1| predicted protein [Populus trichocarpa]	XP_002318358, EEE96578	4.23e-13	86.0465	71.2478	43	37
C734347	---NA---	202	No Blast Hit
C734369	---NA---	202	No Blast Hit
C734377	---NA---	202	No Blast Hit
C734383	---NA---	202	No Blast Hit
C734393	lanthionine synthetase c-like protein 1	202	gi|169602353|ref|XP_001794598.1|hypothetical protein SNOG_04174 [Phaeosphaeria nodorum SN15] gi|111066814|gb|EAT87934.1| hypothetical protein SNOG_04174 [Phaeosphaeria nodorum SN15]	XP_001794598, EAT87934	5.39e-20	97.619	89.7373	42	41
C734397	---NA---	202	No Blast Hit
C734403	delta-aminolevulinic acid dehydratase	202	gi|1097877|prf||2114378Aaminolevulinate dehydratase	2114378A	5.27e-37	97.0149	137.117	67	65
C734407	---NA---	202	No Blast Hit
C734419	60s ribosomal protein l35	202	gi|388519795|gb|AFK47959.1|unknown [Medicago truncatula]	AFK47959	1.92e-36	100	128.642	67	67
C734425	---NA---	202	No Blast Hit
C734427	---NA---	202	No Blast Hit
C734473	---NA---	202	No Blast Hit
C734487	---NA---	202	No Blast Hit
C734497	leucine-rich repeat containing	202	gi|255555357|ref|XP_002518715.1|leucine-rich repeat-containing protein, putative [Ricinus communis] gi|223542096|gb|EEF43640.1| leucine-rich repeat-containing protein, putative [Ricinus communis]	XP_002518715, EEF43640	2.38e-12	70	70.0922	70	49
C734507	---NA---	202	No Blast Hit
C734517	---NA---	202	No Blast Hit
C734527	---NA---	202	No Blast Hit
C734535	---NA---	202	No Blast Hit
C734547	---NA---	202	No Blast Hit
C734553	---NA---	202	No Blast Hit
C734565	---NA---	202	No Blast Hit
C734589	---NA---	202	No Blast Hit
C734593	---NA---	202	No Blast Hit
C734597	---NA---	202	No Blast Hit
C734617	---NA---	202	No Blast Hit
C734639	---NA---	202	No Blast Hit
C734649	chlorophyll a-b binding protein type i	202	gi|374412428|gb|AEZ49172.1|chlorophyll a/b binding protein of LHCII type I [Wolffia australiana]	AEZ49172	1.14e-29	88.0597	114.775	67	59
C734651	---NA---	202	No Blast Hit
C734653	---NA---	202	No Blast Hit
C734665	---NA---	202	No Blast Hit
C734681	---NA---	202	No Blast Hit
C734683	---NA---	202	No Blast Hit
C734699	---NA---	202	No Blast Hit
C734709	---NA---	202	No Blast Hit
C734711	nuclease harbi1-like	202	gi|357130831|ref|XP_003567049.1|PREDICTED: uncharacterized protein LOC100824798 [Brachypodium distachyon]	XP_003567049	1.04e-13	97.1429	70.8626	35	34
C734715	---NA---	202	No Blast Hit
C734739	leucine-rich repeat transmembrane protein kinase	202	gi|255544644|ref|XP_002513383.1|ATP binding protein, putative [Ricinus communis] gi|223547291|gb|EEF48786.1| ATP binding protein, putative [Ricinus communis]	XP_002513383, EEF48786	7.17e-32	97.0149	125.946	67	65
C734747	---NA---	202	No Blast Hit
C734775	reverse transcriptase	202	gi|47824985|gb|AAT38758.1|Putative gag-pol polyprotein, identical [Solanum demissum]	AAT38758	3.08e-25	86.5672	107.457	67	58
C734779	---NA---	202	No Blast Hit
C734781	---NA---	202	No Blast Hit
C734783	---NA---	202	No Blast Hit
C734793	---NA---	202	No Blast Hit
C734805	topless-related protein 4	202	gi|356546114|ref|XP_003541476.1|PREDICTED: topless-related protein 4-like [Glycine max]	XP_003541476	3.4e-18	93.617	87.0409	47	44
C734813	---NA---	202	No Blast Hit
C734825	---NA---	202	No Blast Hit
C734837	conserved hypothetical protein	202	gi|255542568|ref|XP_002512347.1|conserved hypothetical protein [Ricinus communis] gi|223548308|gb|EEF49799.1| conserved hypothetical protein [Ricinus communis]	XP_002512347, EEF49799	1.75e-09	64.6154	61.2326	65	42
C734849	elongation factor 1-	202	gi|110681478|emb|CAL25349.1|elongation factor 1 alpha [Platanus x acerifolia]	CAL25349	1.69e-39	100	138.658	67	67
C734857	---NA---	202	No Blast Hit
C734861	---NA---	202	No Blast Hit
C734881	---NA---	202	No Blast Hit
C734883	---NA---	202	No Blast Hit
C734885	---NA---	202	No Blast Hit
C734891	---NA---	202	No Blast Hit
C734897	---NA---	202	No Blast Hit
C734901	---NA---	202	No Blast Hit
C734911	40s ribosomal protein s3	202	gi|326901586|gb|AEA10071.1|40S ribosomal protein S3 [Grosmannia sp. SMA-2010] gi|326901588|gb|AEA10072.1| 40S ribosomal protein S3 [Grosmannia sp. SMA-2010] gi|326901590|gb|AEA10073.1| 40S ribosomal protein S3 [Grosmannia sp. SMA-2010] gi|326901592|gb|AEA10074.1| 40S ribosomal protein S3 [Grosmannia sp. SMA-2010] gi|326901594|gb|AEA10075.1| 40S ribosomal protein S3 [Grosmannia sp. SMA-2010] gi|32…	AEA10071, AEA10072, AEA10073, AEA10074, AEA10075, AEA10076, AEA10077, AEA10078, AEA10080, AEA10081, AEA10082, AEA10083, AEA10084, AEA10085, AEA10086, AEA10087, AEA10088, AEA10089, AEA10090, AEA10091, AEA10092, AEA10093, AEA10094, AEA10095, AEA10096, AEA10097, AEA10098, AEA10099, AEA10100, AEA10101, AEA10102, AEA10103, AEA10104, AEA10105, AEA10106, AEA10107, AEA10108, AEA10109, AEA10110, AEA10111,…	8.39e-37	100	131.724	66	66
C734919	---NA---	202	No Blast Hit
C734929	---NA---	202	No Blast Hit
C734939	protein kinase domain-containing protein	202	gi|255567852|ref|XP_002524904.1|wall-associated kinase, putative [Ricinus communis] gi|223535867|gb|EEF37528.1| wall-associated kinase, putative [Ricinus communis]	XP_002524904, EEF37528	1.4e-25	83.5821	107.457	67	56
C734951	---NA---	202	No Blast Hit
C734961	---NA---	202	No Blast Hit
C734967	---NA---	202	No Blast Hit
C734973	---NA---	202	No Blast Hit
C734977	---NA---	202	No Blast Hit
C734983	---NA---	202	No Blast Hit
C734991	beta glucosidase 16	202	gi|255542161|ref|XP_002512144.1|beta-glucosidase, putative [Ricinus communis] gi|223548688|gb|EEF50178.1| beta-glucosidase, putative [Ricinus communis]	XP_002512144, EEF50178	1.63e-13	100	72.0182	35	35
C734997	---NA---	202	No Blast Hit
C735003	---NA---	202	No Blast Hit
C735005	cytochrome p450	202	gi|255580539|ref|XP_002531094.1|cytochrome P450, putative [Ricinus communis] gi|223529340|gb|EEF31308.1| cytochrome P450, putative [Ricinus communis]	XP_002531094, EEF31308	5.97e-18	87.8788	85.1149	66	58
C735019	---NA---	202	No Blast Hit
C735031	---NA---	202	No Blast Hit
C735033	predicted protein	202	gi|396471854|ref|XP_003838968.1|predicted protein [Leptosphaeria maculans JN3] gi|312215537|emb|CBX95489.1| predicted protein [Leptosphaeria maculans JN3]	XP_003838968, CBX95489	2.08e-24	79.1045	99.7525	67	53
C735041	---NA---	202	No Blast Hit
C735045	---NA---	202	No Blast Hit
C735055	---NA---	202	No Blast Hit
C735069	---NA---	202	No Blast Hit
C735071	---NA---	202	No Blast Hit
C735085	---NA---	202	No Blast Hit
C735087	beta actin	202	gi|126542055|gb|ABO16472.1|actin [Moniliophthora perniciosa]	ABO16472	5.2e-40	98.4848	138.272	66	65
C735093	---NA---	202	No Blast Hit
C735095	---NA---	202	No Blast Hit
C735109	---NA---	202	No Blast Hit
C735111	---NA---	202	No Blast Hit
C735113	---NA---	202	No Blast Hit
C735127	---NA---	202	No Blast Hit
C735131	bark storage protein a-like	202	gi|224119752|ref|XP_002331152.1|predicted protein [Populus trichocarpa] gi|222873235|gb|EEF10366.1| predicted protein [Populus trichocarpa]	XP_002331152, EEF10366	2.79e-18	77.6119	84.7297	67	52
C735137	---NA---	202	No Blast Hit
C735153	---NA---	202	No Blast Hit
C735177	---NA---	202	No Blast Hit
C735191	cc-nbs-lrr resistance protein	202	gi|255542484|ref|XP_002512305.1|phosphoprotein phosphatase, putative [Ricinus communis] gi|223548266|gb|EEF49757.1| phosphoprotein phosphatase, putative [Ricinus communis]	XP_002512305, EEF49757	1.75e-14	69.1176	76.6406	68	47
C735197	---NA---	202	No Blast Hit
C735199	---NA---	202	No Blast Hit
C735209	---NA---	202	No Blast Hit
C735213	---NA---	202	No Blast Hit
C735215	---NA---	202	No Blast Hit
C735231	---NA---	202	No Blast Hit
C735235	40s ribosomal protein s14	202	gi|336271277|ref|XP_003350397.1|40S ribosomal protein S14 [Sordaria macrospora k-hell] gi|380090919|emb|CCC11452.1| unnamed protein product [Sordaria macrospora k-hell]	XP_003350397, CCC11452	2.3e-38	98.4848	134.42	66	65
C735243	---NA---	202	No Blast Hit
C735249	---NA---	202	No Blast Hit
C735255	---NA---	202	No Blast Hit
C735257	---NA---	202	No Blast Hit
C735261	---NA---	202	No Blast Hit
C735277	---NA---	202	No Blast Hit
C735299	opsin-1	202	gi|396470148|ref|XP_003838574.1|similar to opsin-1 [Leptosphaeria maculans JN3] gi|312215142|emb|CBX95095.1| similar to opsin-1 [Leptosphaeria maculans JN3]	XP_003838574, CBX95095	1.48e-25	95.3846	104.375	65	62
C735303	---NA---	202	No Blast Hit
C735307	conserved hypothetical protein	202	gi|212543151|ref|XP_002151730.1|conserved hypothetical protein [Penicillium marneffei ATCC 18224] gi|210066637|gb|EEA20730.1| conserved hypothetical protein [Penicillium marneffei ATCC 18224]	XP_002151730, EEA20730	3.38e-31	93.9394	116.701	66	62
C735327	---NA---	202	No Blast Hit
C735329	pentatricopeptide repeat-containing protein	202	gi|147801111|emb|CAN75464.1|hypothetical protein VITISV_006518 [Vitis vinifera]	CAN75464	7.65e-10	83.7838	62.3882	37	31
C735347	---NA---	202	No Blast Hit
C735349	retrotransposon ty3-gypsy subclass	202	gi|113205348|gb|ABI34354.1|Retrotransposon gag protein [Solanum demissum]	ABI34354	2e-13	68.6567	73.559	67	46
C735361	---NA---	202	No Blast Hit
C735367	---NA---	202	No Blast Hit
C735371	---NA---	202	No Blast Hit
C735389	---NA---	202	No Blast Hit
C735395	---NA---	202	No Blast Hit
C735405	---NA---	202	No Blast Hit
C735427	hypothetical protein HMPREF1120_02264	202	gi|378727629|gb|EHY54088.1|hypothetical protein HMPREF1120_02264 [Exophiala dermatitidis NIH/UT8656]	EHY54088	3.44e-16	77.5862	77.7962	58	45
C735433	---NA---	202	No Blast Hit
C735437	---NA---	202	No Blast Hit
C735445	---NA---	202	No Blast Hit
C735453	---NA---	202	No Blast Hit
C735465	---NA---	202	No Blast Hit
C735481	---NA---	202	No Blast Hit
C735491	---NA---	202	No Blast Hit
C735495	---NA---	202	No Blast Hit
C735501	---NA---	202	No Blast Hit
C735505	---NA---	202	No Blast Hit
C735507	---NA---	202	No Blast Hit
C735515	60s acidic ribosomal protein p0	202	gi|225563002|gb|EEH11281.1|60S acidic ribosomal protein P0 [Ajellomyces capsulatus G186AR]	EEH11281	3.64e-34	98.4848	122.479	66	65
C735519	---NA---	202	No Blast Hit
C735523	---NA---	202	No Blast Hit
C735539	ferredoxin--nadp leaf isozyme	202	gi|242059967|ref|XP_002459129.1|hypothetical protein SORBIDRAFT_03g046340 [Sorghum bicolor] gi|241931104|gb|EES04249.1| hypothetical protein SORBIDRAFT_03g046340 [Sorghum bicolor]	XP_002459129, EES04249	2.72e-37	98.4848	136.732	66	65
C735541	---NA---	202	No Blast Hit
C735557	---NA---	202	No Blast Hit
C735568	---NA---	202	No Blast Hit
C735572	---NA---	202	No Blast Hit
C735576	---NA---	202	No Blast Hit
C735578	---NA---	202	No Blast Hit
C735588	formamidase isoform 1	202	gi|225438970|ref|XP_002284306.1|PREDICTED: formamidase isoform 1 [Vitis vinifera]	XP_002284306	6.42e-10	91.6667	62.3882	36	33
C735592	retrotransposon identical	202	gi|54261821|gb|AAV31171.1|Putative polyprotein, identical [Solanum tuberosum]	AAV31171	1.02e-07	73.8095	56.6102	42	31
C735602	---NA---	202	No Blast Hit
C735612	---NA---	202	No Blast Hit
C735620	---NA---	202	No Blast Hit
C735626	---NA---	202	No Blast Hit
C735632	---NA---	203	No Blast Hit
C735634	---NA---	203	No Blast Hit
C735636	---NA---	203	No Blast Hit
C735656	60s acidic ribosomal protein p1	203	gi|384251184|gb|EIE24662.1|ribosomal protein 60S [Coccomyxa subellipsoidea C-169]	EIE24662	1.06e-12	84.6154	66.6254	52	44
C735660	---NA---	203	No Blast Hit
C735662	---NA---	203	No Blast Hit
C735664	---NA---	203	No Blast Hit
C735666	---NA---	203	No Blast Hit
C735670	---NA---	203	No Blast Hit
C735688	---NA---	203	No Blast Hit
C735690	---NA---	203	No Blast Hit
C735694	---NA---	203	No Blast Hit
C735700	---NA---	203	No Blast Hit
C735706	adenosine kinase	203	gi|398407699|ref|XP_003855315.1|hypothetical protein MYCGRDRAFT_108301 [Zymoseptoria tritici IPO323] gi|339475199|gb|EGP90291.1| hypothetical protein MYCGRDRAFT_108301 [Zymoseptoria tritici IPO323]	XP_003855315, EGP90291	1.95e-25	80.303	104.375	66	53
C735710	low quality protein: polyadenylate-binding protein 3	203	gi|359495203|ref|XP_002263507.2|PREDICTED: LOW QUALITY PROTEIN: polyadenylate-binding protein 3 [Vitis vinifera]	XP_002263507	7.26e-16	71.2121	80.1073	66	47
C735716	---NA---	203	No Blast Hit
C735736	glyceraldehyde-3-phosphate dehydrogenase	203	gi|224925494|gb|ACN69495.1|glyceraldehyde-3-phosphate dehydrogenase [Paecilomyces sp. J18]	ACN69495	1.52e-31	88.0597	117.087	67	59
C735742	ddhd domain-containing protein	203	gi|398388856|ref|XP_003847889.1|hypothetical protein MYCGRDRAFT_106289 [Zymoseptoria tritici IPO323] gi|339467763|gb|EGP82865.1| hypothetical protein MYCGRDRAFT_106289 [Zymoseptoria tritici IPO323]	XP_003847889, EGP82865	1.9e-18	95.122	82.8037	41	39
C735746	---NA---	203	No Blast Hit
C735748	---NA---	203	No Blast Hit
C735754	protein	203	gi|255569678|ref|XP_002525804.1|pentatricopeptide repeat-containing protein, putative [Ricinus communis] gi|223534891|gb|EEF36578.1| pentatricopeptide repeat-containing protein, putative [Ricinus communis]	XP_002525804, EEF36578	1.8e-20	76.1194	87.8113	67	51
C735768	---NA---	203	No Blast Hit
C735776	---NA---	203	No Blast Hit
C735786	---NA---	203	No Blast Hit
C735796	---NA---	203	No Blast Hit
C735804	---NA---	203	No Blast Hit
C735806	---NA---	203	No Blast Hit
C735810	---NA---	203	No Blast Hit
C735812	---NA---	203	No Blast Hit
C735816	endoglucanase ii	203	gi|407917840|gb|EKG11142.1|Glycoside hydrolase family 5 [Macrophomina phaseolina MS6]	EKG11142	5e-25	81.8182	103.219	66	54
C735828	nbs resistance protein	203	gi|255555357|ref|XP_002518715.1|leucine-rich repeat-containing protein, putative [Ricinus communis] gi|223542096|gb|EEF43640.1| leucine-rich repeat-containing protein, putative [Ricinus communis]	XP_002518715, EEF43640	1.91e-18	75.3846	87.8113	65	49
C735832	---NA---	203	No Blast Hit
C735846	disease resistance protein at3g14460-like	203	gi|224106810|ref|XP_002333629.1|predicted protein [Populus trichocarpa] gi|222837837|gb|EEE76202.1| predicted protein [Populus trichocarpa]	XP_002333629, EEE76202	1.35e-07	70.3125	55.8398	64	45
C735866	---NA---	203	No Blast Hit
C735870	---NA---	203	No Blast Hit
C735890	---NA---	203	No Blast Hit
C735906	60s ribosomal protein l24	203	gi|46128597|ref|XP_388852.1|hypothetical protein FG08676.1 [Gibberella zeae PH-1] gi|408388415|gb|EKJ68100.1| hypothetical protein FPSE_11700 [Fusarium pseudograminearum CS3096]	XP_388852, EKJ68100	1.04e-30	96.4286	114.775	56	54
C735916	---NA---	203	No Blast Hit
C735920	---NA---	203	No Blast Hit
C735924	---NA---	203	No Blast Hit
C735932	---NA---	203	No Blast Hit
C735946	ferritin 2	203	gi|29839345|sp|Q8H1T3.1|FRI2_TOBACRecName: Full=Ferritin-2, chloroplastic; AltName: Full=NtFer2; Flags: Precursor gi|22859014|gb|AAN06322.1| ferritin 2 [Nicotiana tabacum]	Q8H1T3, AAN06322	2.94e-35	94.0299	129.413	67	63
C735948	alpha- partial	203	gi|52001189|gb|AAU21475.1|alpha-tubulin, partial [Camellia sinensis]	AAU21475	2.25e-18	100	81.6481	38	38
C735950	---NA---	203	No Blast Hit
C735956	momilactone a synthase-like	203	gi|255566175|ref|XP_002524075.1|short chain alcohol dehydrogenase, putative [Ricinus communis] gi|223536643|gb|EEF38285.1| short chain alcohol dehydrogenase, putative [Ricinus communis]	XP_002524075, EEF38285	3.39e-16	70.1493	77.0258	67	47
C735970	---NA---	203	No Blast Hit
C735974	---NA---	203	No Blast Hit
C735980	---NA---	203	No Blast Hit
C735986	---NA---	203	No Blast Hit
C736002	---NA---	203	No Blast Hit
C736006	---NA---	203	No Blast Hit
C736008	---NA---	203	No Blast Hit
C736024	---NA---	203	No Blast Hit
C736028	ribosomal protein l35a	203	gi|260796809|ref|XP_002593397.1|hypothetical protein BRAFLDRAFT_277091 [Branchiostoma floridae] gi|229278621|gb|EEN49408.1| hypothetical protein BRAFLDRAFT_277091 [Branchiostoma floridae]	XP_002593397, EEN49408	2.02e-18	89.5833	81.6481	48	43
C736052	retroelement pol polyprotein	203	gi|147859193|emb|CAN79684.1|hypothetical protein VITISV_003855 [Vitis vinifera]	CAN79684	7.08e-24	83.5821	100.523	67	56
C736054	---NA---	203	No Blast Hit
C736056	---NA---	203	No Blast Hit
C736066	---NA---	203	No Blast Hit
C736074	---NA---	203	No Blast Hit
C736106	---NA---	203	No Blast Hit
C736108	---NA---	203	No Blast Hit
C736110	---NA---	203	No Blast Hit
C736112	---NA---	203	No Blast Hit
C736118	hypothetical protein RCOM_0679490	203	gi|255551617|ref|XP_002516854.1|hypothetical protein RCOM_0679490 [Ricinus communis] gi|223543942|gb|EEF45468.1| hypothetical protein RCOM_0679490 [Ricinus communis]	XP_002516854, EEF45468	1.74e-12	70.1493	67.781	67	47
C736128	---NA---	203	No Blast Hit
C736134	60s ribosomal protein l1	203	gi|378729036|gb|EHY55495.1|60S ribosomal protein L10a [Exophiala dermatitidis NIH/UT8656]	EHY55495	3.51e-30	100	115.161	57	57
C736164	---NA---	203	No Blast Hit
C736168	---NA---	203	No Blast Hit
C736174	---NA---	203	No Blast Hit
C736176	---NA---	203	No Blast Hit
C736204	---NA---	203	No Blast Hit
C736206	cchc-type integrase	203	gi|109676362|gb|ABG37663.1|CCHC-type integrase [Populus trichocarpa]	ABG37663	8.1e-16	80	80.4925	60	48
C736232	---NA---	203	No Blast Hit
C736274	---NA---	203	No Blast Hit
C736280	---NA---	203	No Blast Hit
C736288	brca1 interacting protein helicase 1	203	gi|255539256|ref|XP_002510693.1|brca1 interacting protein helicase 1 brip1, putative [Ricinus communis] gi|223551394|gb|EEF52880.1| brca1 interacting protein helicase 1 brip1, putative [Ricinus communis]	XP_002510693, EEF52880	1.37e-14	94.8718	76.6406	39	37
C736292	---NA---	203	No Blast Hit
C736294	---NA---	203	No Blast Hit
C736298	---NA---	203	No Blast Hit
C736314	glucan endo- -beta-glucosidase	203	gi|255580057|ref|XP_002530862.1|Glucan endo-1,3-beta-glucosidase precursor, putative [Ricinus communis] gi|223529586|gb|EEF31536.1| Glucan endo-1,3-beta-glucosidase precursor, putative [Ricinus communis]	XP_002530862, EEF31536	2.01e-09	72	60.8474	50	36
C736322	---NA---	203	No Blast Hit
C736336	---NA---	203	No Blast Hit
C736372	---NA---	203	No Blast Hit
C736380	---NA---	203	No Blast Hit
C736388	---NA---	203	No Blast Hit
C736392	---NA---	203	No Blast Hit
C736400	conserved hypothetical protein	203	gi|255586932|ref|XP_002534066.1|conserved hypothetical protein [Ricinus communis] gi|223525893|gb|EEF28310.1| conserved hypothetical protein [Ricinus communis]	XP_002534066, EEF28310	1.3e-27	95.4545	109.768	66	63
C736402	---NA---	203	No Blast Hit
C736404	---NA---	203	No Blast Hit
C736416	---NA---	203	No Blast Hit
C736420	---NA---	203	No Blast Hit
C736444	---NA---	203	No Blast Hit
C736482	---NA---	203	No Blast Hit
C736484	serine acetyltransferase	203	gi|345332775|gb|EGW65230.1|hypothetical protein ECSTECB2F1_4404 [Escherichia coli STEC_B2F1]	EGW65230	1.16e-33	100	120.939	59	59
C736486	probable lrr receptor-like serine threonine-protein kinase at4g08850-like	203	gi|255539801|ref|XP_002510965.1|receptor protein kinase, putative [Ricinus communis] gi|223550080|gb|EEF51567.1| receptor protein kinase, putative [Ricinus communis]	XP_002510965, EEF51567	2.08e-26	95.5224	110.153	67	64
C736490	cold regulated 314 thylakoid membrane 2	203	gi|255557429|ref|XP_002519745.1|COR414-TM1, putative [Ricinus communis] gi|223541162|gb|EEF42718.1| COR414-TM1, putative [Ricinus communis]	XP_002519745, EEF42718	1.17e-07	65.3061	54.299	49	32
C736498	---NA---	203	No Blast Hit
C736502	---NA---	203	No Blast Hit
C736506	glycine hydroxymethyltransferase	203	gi|297736685|emb|CBI25702.3|unnamed protein product [Vitis vinifera]	CBI25702	6.33e-40	98.5075	141.354	67	66
C736518	---NA---	203	No Blast Hit
C736522	---NA---	203	No Blast Hit
C736524	---NA---	203	No Blast Hit
C736526	phosphatidylinositol 3-kinase	203	gi|255568784|ref|XP_002525363.1|phosphatidylinositol 3-kinase class, putative [Ricinus communis] gi|223535326|gb|EEF37001.1| phosphatidylinositol 3-kinase class, putative [Ricinus communis]	XP_002525363, EEF37001	4.22e-18	71.6418	86.2705	67	48
C736530	fk506-binding protein	203	gi|307111330|gb|EFN59564.1|hypothetical protein CHLNCDRAFT_56429 [Chlorella variabilis]	EFN59564	3.2e-22	86.3636	94.7449	66	57
C736534	cellulose synthase-like protein e1	203	gi|224061234|ref|XP_002300383.1|predicted protein [Populus trichocarpa] gi|222847641|gb|EEE85188.1| predicted protein [Populus trichocarpa]	XP_002300383, EEE85188	6.54e-17	81.8182	82.8037	55	45
C736538	---NA---	203	No Blast Hit
C736586	peptidyl-prolyl cis-trans isomerase	203	gi|408531606|emb|CCK29780.1|Peptidyl-prolyl cis-trans isomerase A [Streptomyces davawensis JCM 4913]	CCK29780	1.01e-19	93.3333	86.6557	45	42
C736590	---NA---	203	No Blast Hit
C736592	---NA---	203	No Blast Hit
C736612	---NA---	203	No Blast Hit
C736622	---NA---	203	No Blast Hit
C736636	---NA---	203	No Blast Hit
C736640	---NA---	203	No Blast Hit
C736646	---NA---	203	No Blast Hit
C736648	---NA---	203	No Blast Hit
C736654	---NA---	203	No Blast Hit
C736670	---NA---	203	No Blast Hit
C736674	amino acid permease	203	gi|398409536|ref|XP_003856233.1|hypothetical protein MYCGRDRAFT_65946 [Zymoseptoria tritici IPO323] gi|339476118|gb|EGP91209.1| hypothetical protein MYCGRDRAFT_65946 [Zymoseptoria tritici IPO323]	XP_003856233, EGP91209	2.78e-22	89.2857	97.4413	56	50
C736684	---NA---	203	No Blast Hit
C736686	---NA---	203	No Blast Hit
C736696	---NA---	203	No Blast Hit
C736710	---NA---	203	No Blast Hit
C736728	---NA---	203	No Blast Hit
C736738	#NAME?	203	gi|115401282|ref|XP_001216229.1|1,4-alpha-glucan branching enzyme [Aspergillus terreus NIH2624] gi|114190170|gb|EAU31870.1| 1,4-alpha-glucan branching enzyme [Aspergillus terreus NIH2624]	XP_001216229, EAU31870	4.54e-31	92.5373	122.865	67	62
C736740	---NA---	203	No Blast Hit
C736776	---NA---	203	No Blast Hit
C736780	synaptonemal complex protein	203	gi|255545714|ref|XP_002513917.1|Ribosome-binding protein, putative [Ricinus communis] gi|223547003|gb|EEF48500.1| Ribosome-binding protein, putative [Ricinus communis]	XP_002513917, EEF48500	2.71e-16	88.0597	81.2629	67	59
C736798	---NA---	203	No Blast Hit
C736802	---NA---	203	No Blast Hit
C736814	---NA---	203	No Blast Hit
C736816	---NA---	203	No Blast Hit
C736826	---NA---	203	No Blast Hit
C736836	---NA---	203	No Blast Hit
C736840	---NA---	203	No Blast Hit
C736850	---NA---	203	No Blast Hit
C736862	---NA---	203	No Blast Hit
C736870	---NA---	203	No Blast Hit
C736876	---NA---	203	No Blast Hit
C736888	mfs monosaccharide	203	gi|330931852|ref|XP_003303561.1|hypothetical protein PTT_15817 [Pyrenophora teres f. teres 0-1] gi|311320366|gb|EFQ88340.1| hypothetical protein PTT_15817 [Pyrenophora teres f. teres 0-1]	XP_003303561, EFQ88340	2.66e-24	85.0746	102.834	67	57
C736902	---NA---	203	No Blast Hit
C736926	---NA---	203	No Blast Hit
C736938	---NA---	203	No Blast Hit
C736940	26s protease regulatory subunit 6b	203	gi|169647183|gb|ACA61610.1|hypothetical protein AP2_E06.1 [Arabidopsis lyrata subsp. petraea]	ACA61610	3.28e-38	100	134.42	67	67
C736942	---NA---	203	No Blast Hit
C736952	mannitol dehydrogenase	203	gi|406864609|gb|EKD17653.1|mannitol dehydrogenase [Marssonina brunnea f. sp. 'multigermtubi' MB_m1]	EKD17653	3.29e-20	93.3333	89.3521	45	42
C736970	---NA---	204	No Blast Hit
C736972	rna recognition motif-containing	204	gi|255577189|ref|XP_002529477.1|RNA recognition motif-containing protein, putative [Ricinus communis] gi|223531035|gb|EEF32887.1| RNA recognition motif-containing protein, putative [Ricinus communis]	XP_002529477, EEF32887	7.24e-11	96	65.855	50	48
C736974	---NA---	204	No Blast Hit
C736980	---NA---	204	No Blast Hit
C736992	---NA---	204	No Blast Hit
C736998	chlorophyll a-b binding protein of lhcii	204	gi|55668304|gb|AAV54188.1|chloroplast major light-harvesting complex II protein m9 [Haematococcus pluvialis]	AAV54188	3.77e-32	91.0448	118.242	67	61
C737000	---NA---	204	No Blast Hit
C737022	---NA---	204	No Blast Hit
C737034	---NA---	204	No Blast Hit
C737044	40s ribosomal protein s7	204	gi|119187413|ref|XP_001244313.1|40S ribosomal protein S7 [Coccidioides immitis RS] gi|303317044|ref|XP_003068524.1| 40S ribosomal protein S7 [Coccidioides posadasii C735 delta SOWgp] gi|240108205|gb|EER26379.1| 40S ribosomal protein S7, putative [Coccidioides posadasii C735 delta SOWgp] gi|320038418|gb|EFW20354.1| 40S ribosomal protein S7 [Coccidioides posadasii str. Silveira] gi|392871038|gb|EAS…	XP_001244313, XP_003068524, EER26379, EFW20354, EAS32895	2.24e-25	91.5254	102.064	59	54
C737046	---NA---	204	No Blast Hit
C737054	---NA---	204	No Blast Hit
C737060	dna (cytosine-5)-methyltransferase	204	gi|356540854|ref|XP_003538899.1|PREDICTED: DNA (cytosine-5)-methyltransferase 1-like [Glycine max]	XP_003538899	5.7e-11	83.3333	65.855	36	30
C737062	actin	204	gi|37901017|gb|AAP46148.1|actin 2 [Pseudo-nitzschia multiseries] gi|37935564|gb|AAP46147.1| actin 1 [Pseudo-nitzschia multiseries]	AAP46148, AAP46147	3.04e-41	100	142.124	67	67
C737070	---NA---	204	No Blast Hit
C737076	---NA---	204	No Blast Hit
C737082	---NA---	204	No Blast Hit
C737092	myosin heavy chain	204	gi|124487954|gb|ABN12060.1|putative myosin heavy chain [Maconellicoccus hirsutus]	ABN12060	3.93e-30	91.1765	115.161	68	62
C737108	---NA---	204	No Blast Hit
C737112	---NA---	204	No Blast Hit
C737128	---NA---	204	No Blast Hit
C737130	---NA---	204	No Blast Hit
C737148	---NA---	204	No Blast Hit
C737162	---NA---	204	No Blast Hit
C737180	---NA---	204	No Blast Hit
C737182	---NA---	204	No Blast Hit
C737192	---NA---	204	No Blast Hit
C737204	sugar transporter stl1	204	gi|398395367|ref|XP_003851142.1|hypothetical protein MYCGRDRAFT_44863 [Zymoseptoria tritici IPO323] gi|339471021|gb|EGP86118.1| hypothetical protein MYCGRDRAFT_44863 [Zymoseptoria tritici IPO323]	XP_003851142, EGP86118	7.23e-37	98.5075	137.502	67	66
C737212	---NA---	204	No Blast Hit
C737218	---NA---	204	No Blast Hit
C737222	---NA---	204	No Blast Hit
C737244	---NA---	204	No Blast Hit
C737256	---NA---	204	No Blast Hit
C737258	---NA---	204	No Blast Hit
C737260	cytochrome p450 liketbp	204	gi|356545505|ref|XP_003541181.1|PREDICTED: uncharacterized protein LOC100819147 [Glycine max] gi|356545521|ref|XP_003541189.1| PREDICTED: uncharacterized protein LOC100777801 [Glycine max] gi|356545532|ref|XP_003541194.1| PREDICTED: uncharacterized protein LOC100781007 [Glycine max] gi|356545568|ref|XP_003541211.1| PREDICTED: uncharacterized protein LOC100791131 [Glycine max] gi|356545598|ref|XP_…	XP_003541181, XP_003541189, XP_003541194, XP_003541211, XP_003541225, XP_003541229, XP_003544037, XP_003544039	9.12e-30	86.5672	111.309	67	58
C737276	---NA---	204	No Blast Hit
C737280	---NA---	204	No Blast Hit
C737298	---NA---	204	No Blast Hit
C737300	---NA---	204	No Blast Hit
C737302	---NA---	204	No Blast Hit
C737304	---NA---	204	No Blast Hit
C737314	protein	204	gi|224097650|ref|XP_002311027.1|predicted protein [Populus trichocarpa] gi|222850847|gb|EEE88394.1| predicted protein [Populus trichocarpa]	XP_002311027, EEE88394	1.07e-27	94.0299	110.923	67	63
C737322	nbs-lrr resistance protein	204	gi|255573105|ref|XP_002527482.1|conserved hypothetical protein [Ricinus communis] gi|223533122|gb|EEF34880.1| conserved hypothetical protein [Ricinus communis]	XP_002527482, EEF34880	5.05e-16	76.1194	80.8777	67	51
C737324	---NA---	204	No Blast Hit
C737330	---NA---	204	No Blast Hit
C737346	---NA---	204	No Blast Hit
C737350	protein	204	gi|224125496|ref|XP_002319601.1|predicted protein [Populus trichocarpa] gi|222857977|gb|EEE95524.1| predicted protein [Populus trichocarpa]	XP_002319601, EEE95524	6.52e-09	86.1111	59.3066	36	31
C737358	---NA---	204	No Blast Hit
C737360	---NA---	204	No Blast Hit
C737364	---NA---	204	No Blast Hit
C737380	---NA---	204	No Blast Hit
C737382	hypothetical protein N47_G38930	204	gi|308271961|emb|CBX28569.1|hypothetical protein N47_G38930 [uncultured Desulfobacterium sp.]	CBX28569	5.34e-08	65.3061	54.299	49	32
C737394	---NA---	204	No Blast Hit
C737402	---NA---	204	No Blast Hit
C737406	pentatricopeptide repeat-containing protein	204	gi|255580733|ref|XP_002531188.1|pentatricopeptide repeat-containing protein, putative [Ricinus communis] gi|223529229|gb|EEF31203.1| pentatricopeptide repeat-containing protein, putative [Ricinus communis]	XP_002531188, EEF31203	1e-26	85.0746	110.153	67	57
C737410	---NA---	204	No Blast Hit
C737418	---NA---	204	No Blast Hit
C737420	---NA---	204	No Blast Hit
C737438	run and tbc1 domain containing	204	gi|255568456|ref|XP_002525202.1|run and tbc1 domain containing 3, plant, putative [Ricinus communis] gi|223535499|gb|EEF37168.1| run and tbc1 domain containing 3, plant, putative [Ricinus communis]	XP_002525202, EEF37168	3.3e-17	95.5224	83.9593	67	64
C737464	---NA---	204	No Blast Hit
C737466	---NA---	204	No Blast Hit
C737476	---NA---	204	No Blast Hit
C737478	---NA---	204	No Blast Hit
C737486	---NA---	204	No Blast Hit
C737488	---NA---	204	No Blast Hit
C737492	conserved hypothetical protein	204	gi|255551949|ref|XP_002517019.1|conserved hypothetical protein [Ricinus communis] gi|223543654|gb|EEF45182.1| conserved hypothetical protein [Ricinus communis]	XP_002517019, EEF45182	8.07e-10	62.1622	38.891	37	23
C737494	---NA---	204	No Blast Hit
C737510	---NA---	204	No Blast Hit
C737518	disease resistance protein at4g27190-like	204	gi|147802546|emb|CAN77665.1|hypothetical protein VITISV_007222 [Vitis vinifera]	CAN77665	5.88e-07	59.0909	54.299	66	39
C737532	---NA---	204	No Blast Hit
C737546	---NA---	204	No Blast Hit
C737550	---NA---	204	No Blast Hit
C737570	---NA---	204	No Blast Hit
C737574	---NA---	204	No Blast Hit
C737578	---NA---	204	No Blast Hit
C737582	---NA---	204	No Blast Hit
C737584	---NA---	204	No Blast Hit
C737590	---NA---	204	No Blast Hit
C737596	glycine dehydrogenase	204	gi|53828182|gb|AAU94363.1|glycine decarboxylase P-protein [Moricandia nitens]	AAU94363	2.56e-37	100	138.658	67	67
C737600	---NA---	204	No Blast Hit
C737602	peptidyl-prolyl cis-trans isomerase	204	gi|115442666|ref|XP_001218140.1|peptidyl-prolyl cis-trans isomerase, mitochondrial precursor [Aspergillus terreus NIH2624] gi|114188009|gb|EAU29709.1| peptidyl-prolyl cis-trans isomerase, mitochondrial precursor [Aspergillus terreus NIH2624]	XP_001218140, EAU29709	6.97e-31	100	115.546	55	55
C737606	---NA---	204	No Blast Hit
C737610	---NA---	204	No Blast Hit
C737612	---NA---	204	No Blast Hit
C737614	---NA---	204	No Blast Hit
C737616	---NA---	204	No Blast Hit
C737626	rna-directed dna polymerase (reverse transcriptase)	204	gi|147823313|emb|CAN77449.1|hypothetical protein VITISV_016970 [Vitis vinifera]	CAN77449	6.17e-14	84.2105	54.299	38	32
C737630	---NA---	204	No Blast Hit
C737638	---NA---	204	No Blast Hit
C737662	---NA---	204	No Blast Hit
C737692	---NA---	204	No Blast Hit
C737710	---NA---	204	No Blast Hit
C737720	---NA---	204	No Blast Hit
C737722	---NA---	204	No Blast Hit
C737724	---NA---	204	No Blast Hit
C737760	---NA---	204	No Blast Hit
C737784	translation elongation factor-1 alpha	204	gi|224593211|gb|ACN59925.1|translation elongation factor-1 alpha [Spirogyra sp. 169.80]	ACN59925	1.26e-39	97.0149	135.191	67	65
C737794	---NA---	204	No Blast Hit
C737812	---NA---	204	No Blast Hit
C737818	hypothetical protein AOL_s00004g152	204	gi|345571305|gb|EGX54119.1|hypothetical protein AOL_s00004g152 [Arthrobotrys oligospora ATCC 24927]	EGX54119	2e-19	89.7959	83.9593	49	44
C737830	---NA---	204	No Blast Hit
C737832	---NA---	204	No Blast Hit
C737836	---NA---	204	No Blast Hit
C737842	---NA---	204	No Blast Hit
C737860	---NA---	204	No Blast Hit
C737878	---NA---	204	No Blast Hit
C737892	cc-nbs-lrr resistance protein	204	gi|224059590|ref|XP_002299922.1|cc-nbs-lrr resistance protein [Populus trichocarpa] gi|222847180|gb|EEE84727.1| cc-nbs-lrr resistance protein [Populus trichocarpa]	XP_002299922, EEE84727	5.28e-11	73.5849	66.2402	53	39
C737908	---NA---	204	No Blast Hit
C737912	---NA---	204	No Blast Hit
C737930	---NA---	204	No Blast Hit
C737946	---NA---	204	No Blast Hit
C737966	cc-nbs-lrr resistance protein	204	gi|224111296|ref|XP_002332952.1|cc-nbs-lrr resistance protein [Populus trichocarpa] gi|222834264|gb|EEE72741.1| cc-nbs-lrr resistance protein [Populus trichocarpa]	XP_002332952, EEE72741	4.37e-18	70.1493	86.6557	67	47
C737978	---NA---	204	No Blast Hit
C737986	---NA---	204	No Blast Hit
C737994	---NA---	204	No Blast Hit
C737996	---NA---	204	No Blast Hit
C738002	---NA---	204	No Blast Hit
C738004	---NA---	204	No Blast Hit
C738020	succinate-semialdehyde dehydrogenase	204	gi|327305909|ref|XP_003237646.1|succinate-semialdehyde dehydrogenase [Trichophyton rubrum CBS 118892] gi|326460644|gb|EGD86097.1| succinate-semialdehyde dehydrogenase [Trichophyton rubrum CBS 118892]	XP_003237646, EGD86097	6.38e-20	77.6119	90.5077	67	52
C738032	---NA---	204	No Blast Hit
C738052	---NA---	204	No Blast Hit
C738060	---NA---	204	No Blast Hit
C738070	---NA---	204	No Blast Hit
C738074	---NA---	204	No Blast Hit
C738088	---NA---	204	No Blast Hit
C738104	---NA---	204	No Blast Hit
C738106	---NA---	204	No Blast Hit
C738110	---NA---	204	No Blast Hit
C738112	---NA---	204	No Blast Hit
C738134	---NA---	204	No Blast Hit
C738138	---NA---	204	No Blast Hit
C738148	probable receptor-like protein kinase at1g67000-like	204	gi|255567848|ref|XP_002524902.1|hypothetical protein RCOM_0725500 [Ricinus communis] gi|223535865|gb|EEF37526.1| hypothetical protein RCOM_0725500 [Ricinus communis]	XP_002524902, EEF37526	1.44e-20	79.3103	90.1225	58	46
C738150	---NA---	204	No Blast Hit
C738152	---NA---	204	No Blast Hit
C738158	---NA---	204	No Blast Hit
C738162	---NA---	204	No Blast Hit
C738168	---NA---	204	No Blast Hit
C738190	---NA---	204	No Blast Hit
C738202	---NA---	204	No Blast Hit
C738224	---NA---	204	No Blast Hit
C738240	---NA---	204	No Blast Hit
C738244	---NA---	204	No Blast Hit
C738254	---NA---	204	No Blast Hit
C738266	---NA---	204	No Blast Hit
C738276	---NA---	204	No Blast Hit
C738288	cc-nbs-lrr resistance protein	204	gi|357439641|ref|XP_003590098.1|Cc-nbs resistance protein, partial [Medicago truncatula] gi|355479146|gb|AES60349.1| Cc-nbs resistance protein, partial [Medicago truncatula]	XP_003590098, AES60349	2.26e-15	77.6119	78.9518	67	52
C738294	---NA---	204	No Blast Hit
C738306	---NA---	204	No Blast Hit
C738308	---NA---	204	No Blast Hit
C738334	---NA---	204	No Blast Hit
C738368	---NA---	205	No Blast Hit
C738370	---NA---	205	No Blast Hit
C738372	---NA---	205	No Blast Hit
C738400	actin	205	gi|224497984|gb|ACN53512.1|actin [Cladosporium tenuissimum]	ACN53512	6.32e-41	100	139.428	67	67
C738414	---NA---	205	No Blast Hit
C738416	reverse transcriptase	205	gi|22859201|emb|CAD45566.1|reverse transcriptase [Elaeis guineensis]	CAD45566	1.33e-30	90.9091	114.005	66	60
C738426	---NA---	205	No Blast Hit
C738434	---NA---	205	No Blast Hit
C738468	---NA---	205	No Blast Hit
C738472	---NA---	205	No Blast Hit
C738474	purine permease	205	gi|224084594|ref|XP_002307351.1|predicted protein [Populus trichocarpa] gi|222856800|gb|EEE94347.1| predicted protein [Populus trichocarpa]	XP_002307351, EEE94347	9.62e-32	95.5224	121.709	67	64
C738478	d-cysteine desulfhydrase	205	gi|255573527|ref|XP_002527688.1|1-aminocyclopropane-1-carboxylate deaminase, putative [Ricinus communis] gi|223532919|gb|EEF34687.1| 1-aminocyclopropane-1-carboxylate deaminase, putative [Ricinus communis]	XP_002527688, EEF34687	1.25e-26	83.0769	108.227	65	54
C738486	hypothetical protein MYCGRDRAFT_63646	205	gi|398389783|ref|XP_003848352.1|hypothetical protein MYCGRDRAFT_63646 [Zymoseptoria tritici IPO323] gi|339468227|gb|EGP83328.1| hypothetical protein MYCGRDRAFT_63646 [Zymoseptoria tritici IPO323]	XP_003848352, EGP83328	1.25e-07	72.093	52.7582	43	31
C738492	---NA---	205	No Blast Hit
C738494	---NA---	205	No Blast Hit
C738514	---NA---	205	No Blast Hit
C738524	---NA---	205	No Blast Hit
C738538	---NA---	205	No Blast Hit
C738550	---NA---	205	No Blast Hit
C738564	---NA---	205	No Blast Hit
C738566	---NA---	205	No Blast Hit
C738570	---NA---	205	No Blast Hit
C738572	---NA---	205	No Blast Hit
C738582	hypothetical protein VITISV_008296	205	gi|147819718|emb|CAN73574.1|hypothetical protein VITISV_008296 [Vitis vinifera]	CAN73574	2.85e-16	73.1343	81.2629	67	49
C738590	---NA---	205	No Blast Hit
C738594	---NA---	205	No Blast Hit
C738598	---NA---	205	No Blast Hit
C738608	---NA---	205	No Blast Hit
C738614	hypothetical protein HMPREF1120_01448	205	gi|378726795|gb|EHY53254.1|hypothetical protein HMPREF1120_01448 [Exophiala dermatitidis NIH/UT8656]	EHY53254	4.19e-27	86.5672	112.079	67	58
C738646	---NA---	205	No Blast Hit
C738648	lea domain protein	205	gi|407929162|gb|EKG21997.1|hypothetical protein MPH_00588 [Macrophomina phaseolina MS6]	EKG21997	1.84e-27	89.7059	114.005	68	61
C738674	---NA---	205	No Blast Hit
C738708	---NA---	205	No Blast Hit
C738724	---NA---	205	No Blast Hit
C738728	---NA---	205	No Blast Hit
C738732	---NA---	205	No Blast Hit
C738734	---NA---	205	No Blast Hit
C738748	eukaryotic translation initiation factor 5a-2	205	gi|258565683|ref|XP_002583586.1|eukaryotic translation initiation factor 5A-1 [Uncinocarpus reesii 1704] gi|237907287|gb|EEP81688.1| eukaryotic translation initiation factor 5A-1 [Uncinocarpus reesii 1704]	XP_002583586, EEP81688	1.74e-41	98.5294	142.895	68	67
C738754	---NA---	205	No Blast Hit
C738766	---NA---	205	No Blast Hit
C738770	---NA---	205	No Blast Hit
C738784	---NA---	205	No Blast Hit
C738790	---NA---	205	No Blast Hit
C738794	---NA---	205	No Blast Hit
C738812	---NA---	205	No Blast Hit
C738822	---NA---	205	No Blast Hit
C738834	---NA---	205	No Blast Hit
C738840	---NA---	205	No Blast Hit
C738846	protein	205	gi|224120912|ref|XP_002318450.1|predicted protein [Populus trichocarpa] gi|222859123|gb|EEE96670.1| predicted protein [Populus trichocarpa]	XP_002318450, EEE96670	2.39e-08	79.4118	58.151	68	54
C738848	---NA---	205	No Blast Hit
C738862	---NA---	205	No Blast Hit
C738866	---NA---	205	No Blast Hit
C738874	---NA---	205	No Blast Hit
C738878	---NA---	205	No Blast Hit
C738886	---NA---	205	No Blast Hit
C738910	60s ribosomal protein l13	205	gi|378726470|gb|EHY52929.1|50S ribosomal protein L13e [Exophiala dermatitidis NIH/UT8656]	EHY52929	2.73e-31	91.0448	117.857	67	61
C738916	---NA---	205	No Blast Hit
C738918	---NA---	205	No Blast Hit
C738932	---NA---	205	No Blast Hit
C738938	60s ribosomal protein l1	205	gi|378729036|gb|EHY55495.1|60S ribosomal protein L10a [Exophiala dermatitidis NIH/UT8656]	EHY55495	1.85e-29	98.2456	113.235	57	56
C738952	leunig-like protein	205	gi|255560171|ref|XP_002521103.1|WD-repeat protein, putative [Ricinus communis] gi|223539672|gb|EEF41254.1| WD-repeat protein, putative [Ricinus communis]	XP_002521103, EEF41254	1.02e-18	48.9796	88.1965	98	48
C738972	---NA---	205	No Blast Hit
C738978	ac055769_6copia-type 28768-32772	205	gi|147820839|emb|CAN65188.1|hypothetical protein VITISV_004365 [Vitis vinifera]	CAN65188	2.8e-16	76.3636	78.5666	55	42
C738982	---NA---	205	No Blast Hit
C738998	60s ribosomal protein l10a	205	gi|388858112|emb|CCF48349.1|probable ribosomal protein L10a.e, cytosolic [Ustilago hordei]	CCF48349	1.95e-26	98.1818	105.145	55	54
C739004	---NA---	205	No Blast Hit
C739006	---NA---	205	No Blast Hit
C739012	conserved hypothetical protein	205	gi|255572042|ref|XP_002526962.1|conserved hypothetical protein [Ricinus communis] gi|223533714|gb|EEF35449.1| conserved hypothetical protein [Ricinus communis]	XP_002526962, EEF35449	9.39e-16	73.2143	80.1073	56	41
C739018	---NA---	205	No Blast Hit
C739036	3-ketoacyl- synthase 4-like	205	gi|297741466|emb|CBI32597.3|unnamed protein product [Vitis vinifera]	CBI32597	5.51e-29	86.1538	112.849	65	56
C739052	---NA---	205	No Blast Hit
C739058	---NA---	205	No Blast Hit
C739060	---NA---	205	No Blast Hit
C739062	---NA---	205	No Blast Hit
C739076	---NA---	205	No Blast Hit
C739098	---NA---	205	No Blast Hit
C739106	---NA---	205	No Blast Hit
C739124	---NA---	205	No Blast Hit
C739128	---NA---	205	No Blast Hit
C739144	---NA---	205	No Blast Hit
C739164	hypothetical protein RCOM_1077370	205	gi|255547478|ref|XP_002514796.1|hypothetical protein RCOM_1077370 [Ricinus communis] gi|223545847|gb|EEF47350.1| hypothetical protein RCOM_1077370 [Ricinus communis]	XP_002514796, EEF47350	5.15e-13	63.0137	72.0182	73	46
C739212	---NA---	205	No Blast Hit
C739224	---NA---	205	No Blast Hit
C739228	---NA---	205	No Blast Hit
C739248	---NA---	205	No Blast Hit
C739260	---NA---	205	No Blast Hit
C739266	---NA---	205	No Blast Hit
C739268	---NA---	205	No Blast Hit
C739276	---NA---	205	No Blast Hit
C739282	---NA---	205	No Blast Hit
C739284	---NA---	205	No Blast Hit
C739290	---NA---	205	No Blast Hit
C739302	---NA---	205	No Blast Hit
C739316	---NA---	205	No Blast Hit
C739322	---NA---	205	No Blast Hit
C739358	---NA---	205	No Blast Hit
C739368	---NA---	205	No Blast Hit
C739394	---NA---	205	No Blast Hit
C739408	hypothetical protein VITISV_017108	205	gi|147770062|emb|CAN72141.1|hypothetical protein VITISV_017108 [Vitis vinifera]	CAN72141	4.78e-34	95.5882	132.494	68	65
C739416	mitochondrial phosphate carrier	205	gi|378727786|gb|EHY54245.1|MC family mitochondrial carrier protein [Exophiala dermatitidis NIH/UT8656]	EHY54245	2.32e-35	95.5882	132.109	68	65
C739426	leucine-rich repeat containing	205	gi|255573846|ref|XP_002527842.1|leucine-rich repeat containing protein, putative [Ricinus communis] gi|223532766|gb|EEF34545.1| leucine-rich repeat containing protein, putative [Ricinus communis]	XP_002527842, EEF34545	2.57e-11	77.7778	67.0106	54	42
C739450	---NA---	205	No Blast Hit
C739456	---NA---	205	No Blast Hit
C739458	---NA---	205	No Blast Hit
C739466	replication factor a1	205	gi|255546005|ref|XP_002514062.1|replication factor A 1, rfa1, putative [Ricinus communis] gi|223546518|gb|EEF48016.1| replication factor A 1, rfa1, putative [Ricinus communis]	XP_002514062, EEF48016	2.35e-12	82.9787	69.707	47	39
C739472	---NA---	205	No Blast Hit
C739492	---NA---	205	No Blast Hit
C739500	---NA---	205	No Blast Hit
C739502	---NA---	205	No Blast Hit
C739516	---NA---	205	No Blast Hit
C739526	---NA---	205	No Blast Hit
C739536	---NA---	205	No Blast Hit
C739544	---NA---	205	No Blast Hit
C739546	---NA---	205	No Blast Hit
C739552	---NA---	205	No Blast Hit
C739572	---NA---	205	No Blast Hit
C739588	---NA---	205	No Blast Hit
C739604	---NA---	205	No Blast Hit
C739624	---NA---	205	No Blast Hit
C739626	---NA---	205	No Blast Hit
C739630	---NA---	205	No Blast Hit
C739638	---NA---	205	No Blast Hit
C739640	---NA---	205	No Blast Hit
C739648	---NA---	205	No Blast Hit
C739660	---NA---	205	No Blast Hit
C739666	transcription factor	205	gi|255576577|ref|XP_002529179.1|transcription factor, putative [Ricinus communis] gi|223531357|gb|EEF33193.1| transcription factor, putative [Ricinus communis]	XP_002529179, EEF33193	5.26e-20	90	90.1225	50	45
C739674	retrotransposon ty3-gypsy subclass	205	gi|51854439|gb|AAU10818.1|putative polyprotein [Oryza sativa Japonica Group]	AAU10818	7.47e-19	83.7838	68.1662	37	31
C739676	---NA---	205	No Blast Hit
C739688	---NA---	205	No Blast Hit
C739692	---NA---	205	No Blast Hit
C739702	---NA---	205	No Blast Hit
C739706	---NA---	205	No Blast Hit
C739712	---NA---	205	No Blast Hit
C739726	---NA---	205	No Blast Hit
C739728	---NA---	205	No Blast Hit
C739730	---NA---	205	No Blast Hit
C739732	protein	205	gi|147783961|emb|CAN63563.1|hypothetical protein VITISV_003097 [Vitis vinifera]	CAN63563	1.37e-19	85.0746	90.8929	67	57
C739734	---NA---	205	No Blast Hit
C739742	potassium transporter	205	gi|255575894|ref|XP_002528844.1|Potassium transporter, putative [Ricinus communis] gi|223531695|gb|EEF33518.1| Potassium transporter, putative [Ricinus communis]	XP_002528844, EEF33518	1.09e-20	83.5821	93.5893	67	56
C739750	---NA---	205	No Blast Hit
C739754	---NA---	205	No Blast Hit
C739760	---NA---	205	No Blast Hit
C739766	hypothetical protein TRIATDRAFT_255346	206	gi|358399225|gb|EHK48568.1|hypothetical protein TRIATDRAFT_255346 [Trichoderma atroviride IMI 206040]	EHK48568	3.69e-18	90.2439	79.7221	41	37
C739796	---NA---	206	No Blast Hit
C739816	---NA---	206	No Blast Hit
C739844	---NA---	206	No Blast Hit
C739854	---NA---	206	No Blast Hit
C739862	partial	206	gi|229365377|dbj|BAH57949.1|actin [Pyrenochaeta lycopersici] gi|229365379|dbj|BAH57950.1| actin [Pyrenochaeta lycopersici] gi|229365381|dbj|BAH57951.1| actin [Pyrenochaeta lycopersici] gi|229365383|dbj|BAH57952.1| actin [Pyrenochaeta lycopersici] gi|229365385|dbj|BAH57953.1| actin [Pyrenochaeta lycopersici] gi|229365387|dbj|BAH57954.1| actin [Pyrenochaeta lycopersici] gi|229365389|dbj|BAH57955.1|…	BAH57949, BAH57950, BAH57951, BAH57952, BAH57953, BAH57954, BAH57955, BAH57956, BAH57957, BAH57958, BAH57959, BAH57960, BAH57961, BAH57962, BAH57963, BAH57964, BAH57965, BAH57966, BAH57967, BAH57968	5.17e-41	100	141.354	68	68
C739870	---NA---	206	No Blast Hit
C739874	---NA---	206	No Blast Hit
C739886	---NA---	206	No Blast Hit
C739888	---NA---	206	No Blast Hit
C739900	---NA---	206	No Blast Hit
C739902	---NA---	206	No Blast Hit
C739914	cuticular protein	206	gi|242004387|ref|XP_002423073.1|cutile protein, putative [Pediculus humanus corporis] gi|212506004|gb|EEB10335.1| cutile protein, putative [Pediculus humanus corporis]	XP_002423073, EEB10335	1.34e-11	77.3585	65.4698	53	41
C739918	---NA---	206	No Blast Hit
C739924	---NA---	206	No Blast Hit
C739934	---NA---	206	No Blast Hit
C739938	---NA---	206	No Blast Hit
C739942	---NA---	206	No Blast Hit
C739948	---NA---	206	No Blast Hit
C739954	imp dehydrogenase gmp	206	gi|255569922|ref|XP_002525924.1|conserved hypothetical protein [Ricinus communis] gi|223534753|gb|EEF36444.1| conserved hypothetical protein [Ricinus communis]	XP_002525924, EEF36444	5.39e-14	88.8889	71.633	36	32
C739968	---NA---	206	No Blast Hit
C739976	---NA---	206	No Blast Hit
C739990	---NA---	206	No Blast Hit
C739994	---NA---	206	No Blast Hit
C739996	---NA---	206	No Blast Hit
C740000	---NA---	206	No Blast Hit
C740008	serine glyoxylate aminotransferase	206	gi|307111546|gb|EFN59780.1|hypothetical protein CHLNCDRAFT_33614 [Chlorella variabilis]	EFN59780	1.26e-28	83.5821	114.005	67	56
C740010	ankyrin repeat domain-containing protein	206	gi|356514671|ref|XP_003526027.1|PREDICTED: ankyrin-3-like [Glycine max]	XP_003526027	2.68e-07	63.1579	54.6842	76	48
C740012	---NA---	206	No Blast Hit
C740058	---NA---	206	No Blast Hit
C740070	---NA---	206	No Blast Hit
C740086	retrotransposon ty3-gypsy subclass	206	gi|109676362|gb|ABG37663.1|CCHC-type integrase [Populus trichocarpa]	ABG37663	8.4e-11	58.9286	65.855	56	33
C740108	---NA---	206	No Blast Hit
C740112	serine-threonine protein plant-	206	gi|255543361|ref|XP_002512743.1|serine-threonine protein kinase, plant-type, putative [Ricinus communis] gi|223547754|gb|EEF49246.1| serine-threonine protein kinase, plant-type, putative [Ricinus communis]	XP_002512743, EEF49246	4.92e-07	73.913	54.6842	46	34
C740116	protein	206	gi|359487164|ref|XP_003633525.1|PREDICTED: probable leucine-rich repeat receptor-like protein kinase At1g35710-like [Vitis vinifera]	XP_003633525	3.42e-22	85.0746	98.5969	67	57
C740124	---NA---	206	No Blast Hit
C740128	---NA---	206	No Blast Hit
C740134	---NA---	206	No Blast Hit
C740138	retrotransposon ty3-gypsy subclass	206	gi|91795223|gb|ABE60891.1|putative polyprotein [Oryza sativa Japonica Group]	ABE60891	2.49e-13	75	73.1738	48	36
C740148	---NA---	206	No Blast Hit
C740152	---NA---	206	No Blast Hit
C740166	---NA---	206	No Blast Hit
C740168	---NA---	206	No Blast Hit
C740198	---NA---	206	No Blast Hit
C740208	gram domain protein	206	gi|169619567|ref|XP_001803196.1|hypothetical protein SNOG_12982 [Phaeosphaeria nodorum SN15] gi|160703855|gb|EAT79782.2| hypothetical protein SNOG_12982 [Phaeosphaeria nodorum SN15]	XP_001803196, EAT79782	4.81e-34	94.1176	132.494	68	64
C740210	---NA---	206	No Blast Hit
C740214	catalase	206	gi|32526568|emb|CAD42909.1|catalase [Prunus persica]	CAD42909	5.17e-21	100	93.5893	43	43
C740216	gag-pol precursor	206	gi|407731642|gb|AFU25705.1|gag-pol precursor [Castanea mollissima]	AFU25705	2.13e-11	64.2857	67.3958	70	45
C740220	---NA---	206	No Blast Hit
C740244	---NA---	206	No Blast Hit
C740256	---NA---	206	No Blast Hit
C740258	glycine dehydrogenase	206	gi|356564051|ref|XP_003550270.1|PREDICTED: glycine dehydrogenase [decarboxylating], mitochondrial-like [Glycine max]	XP_003550270	7.08e-40	100	148.673	68	68
C740276	conserved hypothetical protein	206	gi|255581275|ref|XP_002531449.1|conserved hypothetical protein [Ricinus communis] gi|223528942|gb|EEF30936.1| conserved hypothetical protein [Ricinus communis]	XP_002531449, EEF30936	2.04e-13	80	70.0922	50	40
C740290	---NA---	206	No Blast Hit
C740300	---NA---	206	No Blast Hit
C740306	pinus taeda anonymous locus 0_4543_02 genomic sequence	206	gi|255548618|ref|XP_002515365.1|Cyclic nucleotide-gated ion channel, putative [Ricinus communis] gi|223545309|gb|EEF46814.1| Cyclic nucleotide-gated ion channel, putative [Ricinus communis]	XP_002515365, EEF46814	4.23e-23	92.5926	100.138	54	50
C740312	amp dependent	206	gi|255556324|ref|XP_002519196.1|AMP dependent ligase, putative [Ricinus communis] gi|223541511|gb|EEF43060.1| AMP dependent ligase, putative [Ricinus communis]	XP_002519196, EEF43060	6.05e-24	75	102.449	68	51
C740314	---NA---	206	No Blast Hit
C740328	---NA---	206	No Blast Hit
C740330	glycolate oxidase	206	gi|27549566|gb|AAO17067.1|glycolate oxidase [Zantedeschia aethiopica]	AAO17067	2.42e-36	98.5294	134.42	68	67
C740340	---NA---	206	No Blast Hit
C740358	---NA---	206	No Blast Hit
C740368	---NA---	206	No Blast Hit
C740386	---NA---	206	No Blast Hit
C740390	---NA---	206	No Blast Hit
C740392	---NA---	206	No Blast Hit
C740394	---NA---	206	No Blast Hit
C740396	---NA---	206	No Blast Hit
C740398	---NA---	206	No Blast Hit
C740400	---NA---	206	No Blast Hit
C740416	---NA---	206	No Blast Hit
C740426	---NA---	206	No Blast Hit
C740430	beta-cyanoalanine synthase	206	gi|197293837|gb|ACH58417.1|beta-cyanoalanine synthase 1, partial [Prunus dulcis]	ACH58417	3.8e-41	100	141.354	68	68
C740440	---NA---	206	No Blast Hit
C740442	---NA---	206	No Blast Hit
C740464	---NA---	206	No Blast Hit
C740466	---NA---	206	No Blast Hit
C740472	---NA---	206	No Blast Hit
C740476	---NA---	206	No Blast Hit
C740486	---NA---	206	No Blast Hit
C740492	dehydroquinate dehydratase shikimate:nadp oxidoreductase	206	gi|397911052|gb|AFO68802.1|shikimate dehydrogenase, partial [Gunnera manicata]	AFO68802	6.17e-34	91.1765	127.872	68	62
C740496	---NA---	206	No Blast Hit
C740498	aquaporin	206	gi|380481524|emb|CCF41794.1|aquaporin [Colletotrichum higginsianum]	CCF41794	2.48e-07	61.194	54.6842	67	41
C740504	---NA---	206	No Blast Hit
C740512	---NA---	206	No Blast Hit
C740516	---NA---	206	No Blast Hit
C740532	hypothetical protein LEMA_P056020.1	206	gi|396463300|ref|XP_003836261.1|hypothetical protein LEMA_P056020.1 [Leptosphaeria maculans JN3] gi|312212813|emb|CBX92896.1| hypothetical protein LEMA_P056020.1 [Leptosphaeria maculans JN3]	XP_003836261, CBX92896	6.18e-19	89.7059	86.2705	68	61
C740542	---NA---	206	No Blast Hit
C740552	---NA---	206	No Blast Hit
C740564	cytochrome p450	206	gi|224115696|ref|XP_002317099.1|cytochrome P450 [Populus trichocarpa] gi|222860164|gb|EEE97711.1| cytochrome P450 [Populus trichocarpa]	XP_002317099, EEE97711	3.31e-16	77.6119	80.1073	67	52
C740572	---NA---	206	No Blast Hit
C740586	rotamase, putative	206	gi|255570207|ref|XP_002526064.1|rotamase, putative [Ricinus communis] gi|223534645|gb|EEF36341.1| rotamase, putative [Ricinus communis]	XP_002526064, EEF36341	4.21e-07	73.5849	53.5286	53	39
C740590	---NA---	206	No Blast Hit
C740592	---NA---	206	No Blast Hit
C740594	---NA---	206	No Blast Hit
C740602	---NA---	206	No Blast Hit
C740604	l-xylulose reductase	206	gi|169624457|ref|XP_001805634.1|mannitol dehydrogenase [Phaeosphaeria nodorum SN15] gi|60203003|gb|AAX14688.1| mannitol dehydrogenase [Phaeosphaeria nodorum] gi|111056033|gb|EAT77153.1| mannitol dehydrogenase [Phaeosphaeria nodorum SN15]	XP_001805634, AAX14688, EAT77153	6.24e-35	94.1176	128.642	68	64
C740628	retrotransposon ty3-gypsy subclass	206	gi|113205218|gb|AAT39297.2|Gag-pol protein, putative [Solanum demissum]	AAT39297	3.04e-15	80.3922	78.5666	51	41
C740632	---NA---	206	No Blast Hit
C740644	---NA---	206	No Blast Hit
C740660	---NA---	206	No Blast Hit
C740662	---NA---	206	No Blast Hit
C740676	---NA---	206	No Blast Hit
C740680	---NA---	206	No Blast Hit
C740686	---NA---	206	No Blast Hit
C740690	---NA---	206	No Blast Hit
C740696	---NA---	206	No Blast Hit
C740702	---NA---	206	No Blast Hit
C740714	---NA---	206	No Blast Hit
C740716	---NA---	206	No Blast Hit
C740726	---NA---	206	No Blast Hit
C740728	---NA---	206	No Blast Hit
C740748	zinc finger	206	gi|255553464|ref|XP_002517773.1|Esterase precursor, putative [Ricinus communis] gi|223543045|gb|EEF44580.1| Esterase precursor, putative [Ricinus communis]	XP_002517773, EEF44580	2.87e-14	61.4458	73.9442	83	51
C740754	---NA---	206	No Blast Hit
C740764	---NA---	206	No Blast Hit
C740776	---NA---	206	No Blast Hit
C740780	---NA---	206	No Blast Hit
C740788	---NA---	206	No Blast Hit
C740792	---NA---	206	No Blast Hit
C740804	---NA---	206	No Blast Hit
C740808	---NA---	206	No Blast Hit
C740830	---NA---	206	No Blast Hit
C740832	---NA---	206	No Blast Hit
C740854	Pc22g13630	206	gi|255949044|ref|XP_002565289.1|Pc22g13630 [Penicillium chrysogenum Wisconsin 54-1255] gi|211592306|emb|CAP98651.1| Pc22g13630 [Penicillium chrysogenum Wisconsin 54-1255]	XP_002565289, CAP98651	9.38e-07	73.1707	50.8322	41	30
C740858	---NA---	206	No Blast Hit
C740870	---NA---	206	No Blast Hit
C740888	---NA---	206	No Blast Hit
C740892	auxin-induced protein 5ng4	206	gi|255552656|ref|XP_002517371.1|conserved hypothetical protein [Ricinus communis] gi|223543382|gb|EEF44913.1| conserved hypothetical protein [Ricinus communis]	XP_002517371, EEF44913	7.97e-25	97.0588	102.834	68	66
C740902	---NA---	206	No Blast Hit
C740908	---NA---	206	No Blast Hit
C740916	sugar transporter	206	gi|212526342|ref|XP_002143328.1|galactose-proton symport, putative [Penicillium marneffei ATCC 18224] gi|210072726|gb|EEA26813.1| galactose-proton symport, putative [Penicillium marneffei ATCC 18224]	XP_002143328, EEA26813	2.59e-26	83.5821	109.383	67	56
C740920	---NA---	206	No Blast Hit
C740930	chlorophyll a b binding protein	206	gi|167997433|ref|XP_001751423.1|predicted protein [Physcomitrella patens subsp. patens] gi|162697404|gb|EDQ83740.1| predicted protein [Physcomitrella patens subsp. patens]	XP_001751423, EDQ83740	1.94e-40	97.0588	142.51	68	66
C740934	---NA---	206	No Blast Hit
C740940	---NA---	206	No Blast Hit
C740948	---NA---	206	No Blast Hit
C740954	pdr-type abc transporter 2	206	gi|374093384|gb|AEY84030.1|ABCG3, partial [Triticum aestivum]	AEY84030	2.68e-38	97.0588	134.035	68	66
C740962	---NA---	206	No Blast Hit
C740964	---NA---	206	No Blast Hit
C740976	---NA---	206	No Blast Hit
C740984	---NA---	206	No Blast Hit
C740994	---NA---	206	No Blast Hit
C740996	---NA---	206	No Blast Hit
C740998	---NA---	206	No Blast Hit
C741006	---NA---	206	No Blast Hit
C741008	---NA---	206	No Blast Hit
C741022	---NA---	206	No Blast Hit
C741026	flavonol synthase	206	gi|255545428|ref|XP_002513774.1|flavonol synthase, putative [Ricinus communis] gi|223546860|gb|EEF48357.1| flavonol synthase, putative [Ricinus communis]	XP_002513774, EEF48357	2.89e-30	91.0448	117.472	67	61
C741028	---NA---	206	No Blast Hit
C741032	---NA---	206	No Blast Hit
C741044	---NA---	206	No Blast Hit
C741048	---NA---	206	No Blast Hit
C741062	---NA---	206	No Blast Hit
C741070	---NA---	206	No Blast Hit
C741080	major facilitator superfamily transporter	206	gi|320591261|gb|EFX03700.1|major facilitator superfamily transporter multidrug resistance [Grosmannia clavigera kw1407]	EFX03700	1.29e-31	91.1765	123.635	68	62
C741084	---NA---	206	No Blast Hit
C741094	---NA---	206	No Blast Hit
C741100	cc-nbs-lrr resistance protein	206	gi|224160269|ref|XP_002338183.1|NBS resistance protein [Populus trichocarpa] gi|222871187|gb|EEF08318.1| NBS resistance protein [Populus trichocarpa]	XP_002338183, EEF08318	1.6e-10	69.1176	62.003	68	47
C741120	---NA---	206	No Blast Hit
C741124	---NA---	206	No Blast Hit
C741134	---NA---	206	No Blast Hit
C741136	---NA---	206	No Blast Hit
C741140	---NA---	207	No Blast Hit
C741150	---NA---	207	No Blast Hit
C741164	---NA---	207	No Blast Hit
C741166	---NA---	207	No Blast Hit
C741192	60s acidic ribosomal protein p1	207	gi|169604764|ref|XP_001795803.1|hypothetical protein SNOG_05397 [Phaeosphaeria nodorum SN15] gi|160706637|gb|EAT87788.2| hypothetical protein SNOG_05397 [Phaeosphaeria nodorum SN15]	XP_001795803, EAT87788	2.64e-13	72.3077	69.707	65	47
C741198	---NA---	207	No Blast Hit
C741204	---NA---	207	No Blast Hit
C741208	---NA---	207	No Blast Hit
C741220	---NA---	207	No Blast Hit
C741222	protein dicer-like 2	207	gi|255547506|ref|XP_002514810.1|ATP binding protein, putative [Ricinus communis] gi|223545861|gb|EEF47364.1| ATP binding protein, putative [Ricinus communis]	XP_002514810, EEF47364	1.62e-22	82.0896	99.7525	67	55
C741224	---NA---	207	No Blast Hit
C741226	---NA---	207	No Blast Hit
C741228	---NA---	207	No Blast Hit
C741230	---NA---	207	No Blast Hit
C741238	---NA---	207	No Blast Hit
C741250	---NA---	207	No Blast Hit
C741258	---NA---	207	No Blast Hit
C741284	---NA---	207	No Blast Hit
C741306	---NA---	207	No Blast Hit
C741312	---NA---	207	No Blast Hit
C741316	---NA---	207	No Blast Hit
C741328	---NA---	207	No Blast Hit
C741332	---NA---	207	No Blast Hit
C741336	copia-type polyprotein	207	gi|12321254|gb|AAG50698.1|AC079604_5copia-type polyprotein, putative [Arabidopsis thaliana] gi|12321387|gb|AAG50765.1|AC079131_10 copia-type polyprotein, putative [Arabidopsis thaliana]	AAG50698, AAG50765	1.65e-27	85.5072	114.005	69	59
C741342	---NA---	207	No Blast Hit
C741346	---NA---	207	No Blast Hit
C741356	---NA---	207	No Blast Hit
C741364	---NA---	207	No Blast Hit
C741374	---NA---	207	No Blast Hit
C741394	peptidyl-prolyl cis-trans isomerase	207	gi|156054872|ref|XP_001593362.1|peptidyl-prolyl cis-trans isomerase [Sclerotinia sclerotiorum 1980] gi|154704064|gb|EDO03803.1| peptidyl-prolyl cis-trans isomerase [Sclerotinia sclerotiorum 1980 UF-70]	XP_001593362, EDO03803	8.55e-31	100	115.546	68	68
C741396	---NA---	207	No Blast Hit
C741402	40s ribosomal protein s17	207	gi|350633689|gb|EHA22054.1|hypothetical protein ASPNIDRAFT_127402 [Aspergillus niger ATCC 1015]	EHA22054	1.98e-38	97.0588	135.191	68	66
C741412	---NA---	207	No Blast Hit
C741420	---NA---	207	No Blast Hit
C741422	---NA---	207	No Blast Hit
C741438	---NA---	207	No Blast Hit
C741470	---NA---	207	No Blast Hit
C741476	---NA---	207	No Blast Hit
C741478	---NA---	207	No Blast Hit
C741490	---NA---	207	No Blast Hit
C741500	---NA---	207	No Blast Hit
C741524	peptide transporter	207	gi|224146337|ref|XP_002325970.1|predicted protein [Populus trichocarpa] gi|222862845|gb|EEF00352.1| predicted protein [Populus trichocarpa]	XP_002325970, EEF00352	1.02e-10	84.6154	65.0846	39	33
C741526	ubiquinol-cytochrome c chaperone family protein	207	gi|145341022|ref|XP_001415615.1|predicted protein [Ostreococcus lucimarinus CCE9901] gi|144575838|gb|ABO93907.1| predicted protein [Ostreococcus lucimarinus CCE9901]	XP_001415615, ABO93907	2.48e-14	65.6716	72.4034	67	44
C741534	---NA---	207	No Blast Hit
C741536	---NA---	207	No Blast Hit
C741544	---NA---	207	No Blast Hit
C741564	---NA---	207	No Blast Hit
C741566	---NA---	207	No Blast Hit
C741584	---NA---	207	No Blast Hit
C741586	---NA---	207	No Blast Hit
C741600	---NA---	207	No Blast Hit
C741622	low quality protein: cell wall-associated hydrolase	207	gi|121281919|gb|ABM53543.1|conserved hypothetical protein [uncultured beta proteobacterium CBNPD1 BAC clone 578]	ABM53543	5.43e-15	71.1864	72.7886	59	42
C741624	---NA---	207	No Blast Hit
C741634	---NA---	207	No Blast Hit
C741638	---NA---	207	No Blast Hit
C741648	glutathione s-transferase	207	gi|375104343|ref|ZP_09750604.1|glutathione S-transferase [Burkholderiales bacterium JOSHI_001] gi|374665074|gb|EHR69859.1| glutathione S-transferase [Burkholderiales bacterium JOSHI_001]	ZP_09750604, EHR69859	4.11e-24	88.0597	98.9821	67	59
C741664	---NA---	207	No Blast Hit
C741668	---NA---	207	No Blast Hit
C741678	---NA---	207	No Blast Hit
C741682	---NA---	207	No Blast Hit
C741692	---NA---	207	No Blast Hit
C741698	pyruvate dehydrogenase e1 beta subunit	207	gi|384253376|gb|EIE26851.1|pyruvate dehydrogenase [Coccomyxa subellipsoidea C-169]	EIE26851	1.91e-17	91.3043	82.4185	46	42
C741700	---NA---	207	No Blast Hit
C741706	---NA---	207	No Blast Hit
C741720	---NA---	207	No Blast Hit
C741736	conserved hypothetical protein	207	gi|255572191|ref|XP_002527035.1|conserved hypothetical protein [Ricinus communis] gi|223533597|gb|EEF35335.1| conserved hypothetical protein [Ricinus communis]	XP_002527035, EEF35335	2.85e-06	55.8824	51.6026	68	38
C741742	---NA---	207	No Blast Hit
C741746	---NA---	207	No Blast Hit
C741758	---NA---	207	No Blast Hit
C741774	---NA---	207	No Blast Hit
C741776	---NA---	207	No Blast Hit
C741780	---NA---	207	No Blast Hit
C741784	---NA---	207	No Blast Hit
C741786	---NA---	207	No Blast Hit
C741790	---NA---	207	No Blast Hit
C741798	---NA---	207	No Blast Hit
C741806	---NA---	207	No Blast Hit
C741816	---NA---	207	No Blast Hit
C741824	---NA---	207	No Blast Hit
C741832	---NA---	207	No Blast Hit
C741876	---NA---	207	No Blast Hit
C741888	---NA---	207	No Blast Hit
C741896	40s ribosomal protein s9	207	gi|398388503|ref|XP_003847713.1|40S ribosomal protein S9 [Zymoseptoria tritici IPO323] gi|339467586|gb|EGP82689.1| hypothetical protein MYCGRDRAFT_106533 [Zymoseptoria tritici IPO323]	XP_003847713, EGP82689	1.95e-39	98.5294	138.272	68	67
C741902	---NA---	207	No Blast Hit
C741906	gem-like protein 4-like	207	gi|255544123|ref|XP_002513124.1|conserved hypothetical protein [Ricinus communis] gi|223548135|gb|EEF49627.1| conserved hypothetical protein [Ricinus communis]	XP_002513124, EEF49627	1.38e-33	92.5373	124.02	67	62
C741916	---NA---	207	No Blast Hit
C741922	---NA---	207	No Blast Hit
C741924	---NA---	207	No Blast Hit
C741934	---NA---	207	No Blast Hit
C741958	ribulose bisphosphate carboxylase	207	gi|255625881|gb|ACU13285.1|unknown [Glycine max]	ACU13285	1.6e-40	98.5294	140.584	68	67
C741960	---NA---	207	No Blast Hit
C741998	---NA---	207	No Blast Hit
C742004	polyprotein (retrotrasposon protein)	207	gi|313184289|emb|CBL94154.1|putative polyprotein (retrotrasposon protein) [Malus x domestica]	CBL94154	2.16e-27	79.7101	113.62	69	55
C742012	---NA---	207	No Blast Hit
C742022	---NA---	207	No Blast Hit
C742034	---NA---	207	No Blast Hit
C742036	PREDICTED: uncharacterized protein LOC100248711	207	gi|225460963|ref|XP_002279971.1|PREDICTED: uncharacterized protein LOC100248711 [Vitis vinifera] gi|297737440|emb|CBI26641.3| unnamed protein product [Vitis vinifera]	XP_002279971, CBI26641	5.24e-09	86.4865	59.3066	37	32
C742058	---NA---	207	No Blast Hit
C742060	---NA---	207	No Blast Hit
C742096	---NA---	207	No Blast Hit
C742104	40s ribosomal protein s25	207	gi|169598452|ref|XP_001792649.1|hypothetical protein SNOG_02030 [Phaeosphaeria nodorum SN15] gi|111069122|gb|EAT90242.1| hypothetical protein SNOG_02030 [Phaeosphaeria nodorum SN15]	XP_001792649, EAT90242	4.5e-18	95.3846	80.4925	65	62
C742106	---NA---	207	No Blast Hit
C742110	---NA---	207	No Blast Hit
C742116	---NA---	207	No Blast Hit
C742122	---NA---	207	No Blast Hit
C742130	protein	207	gi|307109400|gb|EFN57638.1|hypothetical protein CHLNCDRAFT_59621 [Chlorella variabilis]	EFN57638	7.97e-32	91.1765	118.627	68	62
C742138	imp dehydrogenase gmp related	207	gi|124360599|gb|ABN08598.1|IMP dehydrogenase/GMP reductase, related [Medicago truncatula]	ABN08598	9.92e-07	69.6429	51.9878	56	39
C742144	---NA---	207	No Blast Hit
C742152	---NA---	207	No Blast Hit
C742164	---NA---	207	No Blast Hit
C742166	hypothetical protein CathTA2_0037	207	gi|335041355|ref|ZP_08534440.1|hypothetical protein CathTA2_0037 [Caldalkalibacillus thermarum TA2.A1] gi|334178754|gb|EGL81434.1| hypothetical protein CathTA2_0037 [Caldalkalibacillus thermarum TA2.A1]	ZP_08534440, EGL81434	9.87e-10	62.3188	59.3066	69	43
C742178	---NA---	207	No Blast Hit
C742200	ribosomal s30 ubiquitin fusion	207	gi|239610151|gb|EEQ87138.1|predicted protein [Ajellomyces dermatitidis ER-3] gi|327356374|gb|EGE85231.1| ribosomal S30/ubiquitin fusion [Ajellomyces dermatitidis ATCC 18188]	EEQ87138, EGE85231	8.32e-13	97.0588	65.855	34	33
C742216	---NA---	207	No Blast Hit
C742234	---NA---	207	No Blast Hit
C742238	---NA---	207	No Blast Hit
C742256	---NA---	207	No Blast Hit
C742264	protein	207	gi|147794801|emb|CAN71427.1|hypothetical protein VITISV_027864 [Vitis vinifera]	CAN71427	4.31e-22	78.2609	98.2117	69	54
C742266	---NA---	207	No Blast Hit
C742272	histone h2a	207	gi|154147097|emb|CAO81982.1|histone H2A [Sordaria macrospora]	CAO81982	5.02e-21	97.0588	88.5817	68	66
C742276	---NA---	207	No Blast Hit
C742286	---NA---	207	No Blast Hit
C742288	---NA---	207	No Blast Hit
C742290	---NA---	207	No Blast Hit
C742294	---NA---	207	No Blast Hit
C742312	---NA---	207	No Blast Hit
C742322	---NA---	207	No Blast Hit
C742334	---NA---	207	No Blast Hit
C742340	---NA---	207	No Blast Hit
C742342	---NA---	207	No Blast Hit
C742344	---NA---	207	No Blast Hit
C742354	---NA---	207	No Blast Hit
C742360	---NA---	207	No Blast Hit
C742364	opsin-1	207	gi|398398493|ref|XP_003852704.1|hypothetical protein MYCGRDRAFT_104409 [Zymoseptoria tritici IPO323] gi|339472585|gb|EGP87680.1| hypothetical protein MYCGRDRAFT_104409 [Zymoseptoria tritici IPO323]	XP_003852704, EGP87680	1.48e-28	89.7059	112.464	68	61
C742368	---NA---	207	No Blast Hit
C742384	---NA---	207	No Blast Hit
C742392	alcohol dehydrogenase	207	gi|145253739|ref|XP_001398382.1|alcohol dehydrogenase 2 [Aspergillus niger CBS 513.88] gi|134083954|emb|CAK43049.1| alcohol-dehydrogenase adhA from patent WO8704464-A-Aspergillus niger gi|350634036|gb|EHA22400.1| hypothetical protein ASPNIDRAFT_204476 [Aspergillus niger ATCC 1015]	XP_001398382, CAK43049, EHA22400	1.27e-32	95.5882	124.02	68	65
C742398	cc-nbs-lrr resistance protein	207	gi|255542484|ref|XP_002512305.1|phosphoprotein phosphatase, putative [Ricinus communis] gi|223548266|gb|EEF49757.1| phosphoprotein phosphatase, putative [Ricinus communis]	XP_002512305, EEF49757	1.42e-17	75.3623	85.5001	69	52
C742426	---NA---	207	No Blast Hit
C742428	---NA---	207	No Blast Hit
C742442	---NA---	207	No Blast Hit
C742444	---NA---	207	No Blast Hit
C742446	---NA---	207	No Blast Hit
C742450	---NA---	207	No Blast Hit
C742452	---NA---	207	No Blast Hit
C742468	---NA---	207	No Blast Hit
C742484	---NA---	207	No Blast Hit
C742502	---NA---	207	No Blast Hit
C742520	---NA---	207	No Blast Hit
C742526	---NA---	207	No Blast Hit
C742570	nadh-ubiquinone oxidoreductase b18 subunit	208	gi|169614492|ref|XP_001800662.1|hypothetical protein SNOG_10391 [Phaeosphaeria nodorum SN15] gi|111060665|gb|EAT81785.1| hypothetical protein SNOG_10391 [Phaeosphaeria nodorum SN15]	XP_001800662, EAT81785	1.82e-34	98.3871	122.479	62	61
C742588	---NA---	208	No Blast Hit
C742592	---NA---	208	No Blast Hit
C742622	protein	208	gi|357505893|ref|XP_003623235.1|Receptor kinase-like protein [Medicago truncatula] gi|355498250|gb|AES79453.1| Receptor kinase-like protein [Medicago truncatula]	XP_003623235, AES79453	6.23e-15	74.2424	77.411	66	49
C742630	---NA---	208	No Blast Hit
C742632	transcription factor x1-like protein	208	gi|356553836|ref|XP_003545257.1|PREDICTED: uncharacterized protein LOC100790814 [Glycine max]	XP_003545257	3.53e-19	78.7879	89.7373	66	52
C742648	---NA---	208	No Blast Hit
C742650	---NA---	208	No Blast Hit
C742652	protein	208	gi|255552376|ref|XP_002517232.1|Protein MKS1, putative [Ricinus communis] gi|223543603|gb|EEF45132.1| Protein MKS1, putative [Ricinus communis]	XP_002517232, EEF45132	4.82e-10	82.8571	60.8474	35	29
C742682	---NA---	208	No Blast Hit
C742716	glucose-repressible protein	208	gi|389641315|ref|XP_003718290.1|glucose-repressible protein [Magnaporthe oryzae 70-15] gi|59803120|gb|AAX07712.1| glucose-repressible gene protein-like protein [Magnaporthe grisea] gi|291195727|gb|ADD84580.1| glucose-repressible protein [Magnaporthe oryzae] gi|351640843|gb|EHA48706.1| glucose-repressible protein [Magnaporthe oryzae 70-15]	XP_003718290, AAX07712, ADD84580, EHA48706	6.97e-07	64.7059	50.447	51	33
C742742	---NA---	208	No Blast Hit
C742744	---NA---	208	No Blast Hit
C742750	---NA---	208	No Blast Hit
C742752	---NA---	208	No Blast Hit
C742754	---NA---	208	No Blast Hit
C742764	tir-nbs-lrr resistance protein	208	gi|255555353|ref|XP_002518713.1|Disease resistance protein RPS2, putative [Ricinus communis] gi|223542094|gb|EEF43638.1| Disease resistance protein RPS2, putative [Ricinus communis]	XP_002518713, EEF43638	1.36e-09	80.9524	62.003	42	34
C742766	---NA---	208	No Blast Hit
C742774	---NA---	208	No Blast Hit
C742788	---NA---	208	No Blast Hit
C742794	---NA---	208	No Blast Hit
C742804	---NA---	208	No Blast Hit
C742808	---NA---	208	No Blast Hit
C742814	---NA---	208	No Blast Hit
C742834	---NA---	208	No Blast Hit
C742838	---NA---	208	No Blast Hit
C742848	---NA---	208	No Blast Hit
C742858	---NA---	208	No Blast Hit
C742862	---NA---	208	No Blast Hit
C742872	---NA---	208	No Blast Hit
C742884	---NA---	208	No Blast Hit
C742898	---NA---	208	No Blast Hit
C742914	---NA---	208	No Blast Hit
C742918	---NA---	208	No Blast Hit
C742922	---NA---	208	No Blast Hit
C742928	---NA---	208	No Blast Hit
C742931	small copii coat gtpase sar1	208	gi|398410011|ref|XP_003856461.1|hypothetical protein MYCGRDRAFT_78786 [Zymoseptoria tritici IPO323] gi|339476346|gb|EGP91437.1| hypothetical protein MYCGRDRAFT_78786 [Zymoseptoria tritici IPO323]	XP_003856461, EGP91437	4.35e-39	97.1014	137.502	69	67
C742949	conserved hypothetical protein	208	gi|255563210|ref|XP_002522608.1|conserved hypothetical protein [Ricinus communis] gi|223538084|gb|EEF39695.1| conserved hypothetical protein [Ricinus communis]	XP_002522608, EEF39695	1.59e-11	67.6923	67.781	65	44
C743001	---NA---	208	No Blast Hit
C743009	---NA---	208	No Blast Hit
C743031	---NA---	208	No Blast Hit
C743093	---NA---	208	No Blast Hit
C743095	---NA---	208	No Blast Hit
C743097	---NA---	208	No Blast Hit
C743107	---NA---	208	No Blast Hit
C743111	---NA---	208	No Blast Hit
C743115	---NA---	208	No Blast Hit
C743125	---NA---	208	No Blast Hit
C743143	cytochrome p450	208	gi|255556195|ref|XP_002519132.1|cytochrome P450, putative [Ricinus communis] gi|223541795|gb|EEF43343.1| cytochrome P450, putative [Ricinus communis]	XP_002519132, EEF43343	6.18e-31	88.2353	119.398	68	60
C743173	---NA---	208	No Blast Hit
C743191	---NA---	208	No Blast Hit
C743195	---NA---	208	No Blast Hit
C743203	---NA---	208	No Blast Hit
C743205	---NA---	208	No Blast Hit
C743215	cc-nbs-lrr resistance protein	208	gi|255542484|ref|XP_002512305.1|phosphoprotein phosphatase, putative [Ricinus communis] gi|223548266|gb|EEF49757.1| phosphoprotein phosphatase, putative [Ricinus communis]	XP_002512305, EEF49757	2.22e-15	73.913	79.337	69	51
C743221	---NA---	208	No Blast Hit
C743225	retrotransposon identical	208	gi|147790928|emb|CAN68261.1|hypothetical protein VITISV_004267 [Vitis vinifera]	CAN68261	7.94e-27	87.1429	108.612	70	61
C743235	transcription factor, putative	208	gi|255537643|ref|XP_002509888.1|transcription factor, putative [Ricinus communis] gi|223549787|gb|EEF51275.1| transcription factor, putative [Ricinus communis]	XP_002509888, EEF51275	6.87e-07	64.9123	53.9138	57	37
C743253	---NA---	208	No Blast Hit
C743267	limonoid udp-glucosyltransferase	208	gi|255555263|ref|XP_002518668.1|UDP-glucosyltransferase, putative [Ricinus communis] gi|223542049|gb|EEF43593.1| UDP-glucosyltransferase, putative [Ricinus communis]	XP_002518668, EEF43593	8.08e-38	100	140.198	68	68
C743273	---NA---	208	No Blast Hit
C743301	---NA---	208	No Blast Hit
C743315	---NA---	208	No Blast Hit
C743343	---NA---	208	No Blast Hit
C743363	---NA---	208	No Blast Hit
C743365	---NA---	208	No Blast Hit
C743371	---NA---	208	No Blast Hit
C743375	---NA---	208	No Blast Hit
C743379	hypothetical protein RCOM_0229940	208	gi|255587736|ref|XP_002534377.1|hypothetical protein RCOM_0229940 [Ricinus communis] gi|223525402|gb|EEF28001.1| hypothetical protein RCOM_0229940 [Ricinus communis]	XP_002534377, EEF28001	9.62e-10	70.1493	59.3066	67	47
C743381	rubisco activase	208	gi|342360007|gb|AEL29575.1|chloroplast rubisco activase [Chlorella pyrenoidosa]	AEL29575	1.31e-24	85.2941	102.449	68	58
C743387	40s ribosomal protein s25	208	gi|406861748|gb|EKD14801.1|40S ribosomal protein S25 [Marssonina brunnea f. sp. 'multigermtubi' MB_m1]	EKD14801	1.67e-27	88.0597	105.145	67	59
C743389	---NA---	208	No Blast Hit
C743411	histone h2b	208	gi|225473|prf||1304181Ahistone H2b	1304181A	4.28e-19	97.6744	83.1889	43	42
C743413	---NA---	208	No Blast Hit
C743447	---NA---	208	No Blast Hit
C743477	---NA---	208	No Blast Hit
C743481	---NA---	208	No Blast Hit
C743493	---NA---	208	No Blast Hit
C743495	---NA---	208	No Blast Hit
C743499	---NA---	208	No Blast Hit
C743517	---NA---	208	No Blast Hit
C743531	---NA---	208	No Blast Hit
C743535	pentatricopeptide repeat-containing protein	208	gi|255551705|ref|XP_002516898.1|pentatricopeptide repeat-containing protein, putative [Ricinus communis] gi|223543986|gb|EEF45512.1| pentatricopeptide repeat-containing protein, putative [Ricinus communis]	XP_002516898, EEF45512	5.63e-33	94.1176	125.946	68	64
C743559	---NA---	208	No Blast Hit
C743579	---NA---	208	No Blast Hit
C743599	---NA---	208	No Blast Hit
C743605	---NA---	208	No Blast Hit
C743611	---NA---	208	No Blast Hit
C743621	---NA---	208	No Blast Hit
C743625	---NA---	208	No Blast Hit
C743635	cytochrome b5	208	gi|169618611|ref|XP_001802719.1|hypothetical protein SNOG_12498 [Phaeosphaeria nodorum SN15] gi|160703651|gb|EAT80311.2| hypothetical protein SNOG_12498 [Phaeosphaeria nodorum SN15]	XP_001802719, EAT80311	2.01e-16	97.2973	77.411	37	36
C743639	---NA---	208	No Blast Hit
C743651	---NA---	208	No Blast Hit
C743661	---NA---	208	No Blast Hit
C743667	---NA---	208	No Blast Hit
C743671	---NA---	208	No Blast Hit
C743673	---NA---	208	No Blast Hit
C743677	---NA---	208	No Blast Hit
C743705	---NA---	208	No Blast Hit
C743717	pentatricopeptide repeat-containing protein chloroplastic-like	208	gi|255586885|ref|XP_002534048.1|pentatricopeptide repeat-containing protein, putative [Ricinus communis] gi|223525928|gb|EEF28334.1| pentatricopeptide repeat-containing protein, putative [Ricinus communis]	XP_002534048, EEF28334	9.5e-22	84.127	97.0561	63	53
C743727	hypothetical protein RSPPHO_03279	208	gi|384260402|ref|YP_005415588.1|hypothetical protein RSPPHO_03279 [Rhodospirillum photometricum DSM 122] gi|378401502|emb|CCG06618.1| unnamed protein product [Rhodospirillum photometricum DSM 122]	YP_005415588, CCG06618	1.7e-11	68.5185	63.5438	54	37
C743731	pinus taeda anonymous locus 2_2937_01 genomic sequence	208	gi|384245440|gb|EIE18934.1|ADP/ATP carrier protein [Coccomyxa subellipsoidea C-169]	EIE18934	4.41e-12	73.5294	68.9366	68	50
C743733	---NA---	208	No Blast Hit
C743739	resistance protein rgc2	208	gi|255581680|ref|XP_002531643.1|Disease resistance protein RPS2, putative [Ricinus communis] gi|223528728|gb|EEF30739.1| Disease resistance protein RPS2, putative [Ricinus communis]	XP_002531643, EEF30739	1.64e-20	83.3333	93.5893	66	55
C743741	hat family dimerisation domain containing protein	208	gi|84569878|gb|ABC59221.1|transposase [Zea mays]	ABC59221	2.44e-11	70.1754	67.0106	57	40
C743755	---NA---	208	No Blast Hit
C743769	---NA---	208	No Blast Hit
C743771	---NA---	208	No Blast Hit
C743775	---NA---	208	No Blast Hit
C743831	---NA---	208	No Blast Hit
C743857	---NA---	208	No Blast Hit
C743865	---NA---	208	No Blast Hit
C743867	---NA---	208	No Blast Hit
C743869	---NA---	208	No Blast Hit
C743871	---NA---	208	No Blast Hit
C743899	---NA---	208	No Blast Hit
C743905	alpha-cardiac actin	208	gi|384244614|gb|EIE18114.1|Actin/actin-like protein [Coccomyxa subellipsoidea C-169]	EIE18114	6.3e-29	98.2143	114.39	56	55
C743909	atp-dependent rna helicase sub2	208	gi|169624724|ref|XP_001805767.1|hypothetical protein SNOG_15623 [Phaeosphaeria nodorum SN15] gi|118577978|sp|Q0TXZ2.1|SUB2_PHANO RecName: Full=ATP-dependent RNA helicase SUB2 gi|111055878|gb|EAT76998.1| hypothetical protein SNOG_15623 [Phaeosphaeria nodorum SN15]	XP_001805767, Q0TXZ2, EAT76998	1.05e-36	98.5294	136.346	68	67
C743917	ubiquitin	208	gi|380490173|emb|CCF36198.1|polyubiquitin, partial [Colletotrichum higginsianum]	CCF36198	8.87e-31	100	113.235	55	55
C743923	---NA---	209	No Blast Hit
C743943	---NA---	209	No Blast Hit
C743945	nutrient reservoir, putative	209	gi|255584475|ref|XP_002532967.1|nutrient reservoir, putative [Ricinus communis] gi|223527260|gb|EEF29418.1| nutrient reservoir, putative [Ricinus communis]	XP_002532967, EEF29418	1.79e-14	90.2439	72.0182	41	37
C743953	leucine-rich repeat-containing	209	gi|255537139|ref|XP_002509636.1|leucine-rich repeat-containing protein, putative [Ricinus communis] gi|223549535|gb|EEF51023.1| leucine-rich repeat-containing protein, putative [Ricinus communis]	XP_002509636, EEF51023	2.01e-22	81.1594	99.3673	69	56
C743965	---NA---	209	No Blast Hit
C743971	---NA---	209	No Blast Hit
C743979	---NA---	209	No Blast Hit
C743993	---NA---	209	No Blast Hit
C744001	---NA---	209	No Blast Hit
C744011	alcohol dehydrogenase 1	209	gi|189206680|ref|XP_001939674.1|alcohol dehydrogenase 1 [Pyrenophora tritici-repentis Pt-1C-BFP] gi|187975767|gb|EDU42393.1| alcohol dehydrogenase 1 [Pyrenophora tritici-repentis Pt-1C-BFP]	XP_001939674, EDU42393	1.86e-06	82.3529	52.373	34	28
C744013	---NA---	209	No Blast Hit
C744029	---NA---	209	No Blast Hit
C744039	---NA---	209	No Blast Hit
C744059	---NA---	209	No Blast Hit
C744061	---NA---	209	No Blast Hit
C744071	---NA---	209	No Blast Hit
C744077	---NA---	209	No Blast Hit
C744079	gdsl-motif lipase hydrolase family protein	209	gi|255547464|ref|XP_002514789.1|zinc finger protein, putative [Ricinus communis] gi|223545840|gb|EEF47343.1| zinc finger protein, putative [Ricinus communis]	XP_002514789, EEF47343	7.8e-23	84.375	97.0561	64	54
C744085	---NA---	209	No Blast Hit
C744091	---NA---	209	No Blast Hit
C744095	---NA---	209	No Blast Hit
C744099	---NA---	209	No Blast Hit
C744101	---NA---	209	No Blast Hit
C744125	---NA---	209	No Blast Hit
C744127	---NA---	209	No Blast Hit
C744131	---NA---	209	No Blast Hit
C744139	---NA---	209	No Blast Hit
C744141	---NA---	209	No Blast Hit
C744147	---NA---	209	No Blast Hit
C744159	---NA---	209	No Blast Hit
C744205	---NA---	209	No Blast Hit
C744229	bromodomain-containing protein	209	gi|398411857|ref|XP_003857263.1|transcription initiation factor [Zymoseptoria tritici IPO323] gi|339477148|gb|EGP92239.1| transcription initiation factor [Zymoseptoria tritici IPO323]	XP_003857263, EGP92239	5.61e-27	85.5072	112.079	69	59
C744243	---NA---	209	No Blast Hit
C744259	---NA---	209	No Blast Hit
C744289	---NA---	209	No Blast Hit
C744291	---NA---	209	No Blast Hit
C744303	---NA---	209	No Blast Hit
C744305	---NA---	209	No Blast Hit
C744309	formate dehydrogenase	209	gi|330933287|ref|XP_003304122.1|hypothetical protein PTT_16560 [Pyrenophora teres f. teres 0-1] gi|311319496|gb|EFQ87783.1| hypothetical protein PTT_16560 [Pyrenophora teres f. teres 0-1]	XP_003304122, EFQ87783	1.17e-37	100	138.658	69	69
C744315	---NA---	209	No Blast Hit
C744321	60s ribosomal protein l10a	209	gi|398411118|ref|XP_003856903.1|60S ribosomal protein L1 [Zymoseptoria tritici IPO323] gi|339476788|gb|EGP91879.1| hypothetical protein MYCGRDRAFT_98880 [Zymoseptoria tritici IPO323]	XP_003856903, EGP91879	2.49e-31	98.3051	118.242	59	58
C744331	---NA---	209	No Blast Hit
C744347	---NA---	209	No Blast Hit
C744351	---NA---	209	No Blast Hit
C744383	sts14 protein	209	gi|224105801|ref|XP_002313935.1|predicted protein [Populus trichocarpa] gi|222850343|gb|EEE87890.1| predicted protein [Populus trichocarpa]	XP_002313935, EEE87890	2.59e-29	93.2203	111.309	59	55
C744395	septin	209	gi|398389172|ref|XP_003848047.1|cdc 10 like protein [Zymoseptoria tritici IPO323] gi|339467921|gb|EGP83023.1| cdc 10 like protein [Zymoseptoria tritici IPO323]	XP_003848047, EGP83023	3.47e-38	97.1014	139.043	69	67
C744409	---NA---	209	No Blast Hit
C744413	---NA---	209	No Blast Hit
C744429	---NA---	209	No Blast Hit
C744431	---NA---	209	No Blast Hit
C744433	upf0481 protein at3g47200-like	209	gi|225430232|ref|XP_002282564.1|PREDICTED: UPF0481 protein At3g47200 [Vitis vinifera]	XP_002282564	1.88e-11	61.4286	66.6254	70	43
C744435	---NA---	209	No Blast Hit
C744445	---NA---	209	No Blast Hit
C744469	---NA---	209	No Blast Hit
C744499	---NA---	209	No Blast Hit
C744523	conserved hypothetical protein	209	gi|255545830|ref|XP_002513975.1|conserved hypothetical protein [Ricinus communis] gi|223547061|gb|EEF48558.1| conserved hypothetical protein [Ricinus communis]	XP_002513975, EEF48558	4.01e-18	78.8462	83.1889	52	41
C744535	predicted protein	209	gi|224169398|ref|XP_002339263.1|predicted protein [Populus trichocarpa] gi|222874780|gb|EEF11911.1| predicted protein [Populus trichocarpa]	XP_002339263, EEF11911	1.55e-07	56.6667	53.5286	60	34
C744537	pleiotropic drug resistance protein 1-like	209	gi|413950570|gb|AFW83219.1|hypothetical protein ZEAMMB73_325100 [Zea mays]	AFW83219	6.89e-08	61.9048	53.9138	63	39
C744549	gag-pol identical	209	gi|356523789|ref|XP_003530517.1|PREDICTED: uncharacterized protein LOC100800881 [Glycine max]	XP_003530517	3.86e-30	85.0746	121.709	67	57
C744553	---NA---	209	No Blast Hit
C744561	---NA---	209	No Blast Hit
C744573	---NA---	209	No Blast Hit
C744577	---NA---	209	No Blast Hit
C744579	aquaporin pip1-2	209	gi|170791079|gb|ACB38232.1|aquaporin [Gerbera hybrid cultivar]	ACB38232	1.47e-32	98.2456	122.865	57	56
C744583	hypothetical protein VITISV_008927	209	gi|147786879|emb|CAN62309.1|hypothetical protein VITISV_008927 [Vitis vinifera]	CAN62309	2.39e-07	59.4203	53.1434	69	41
C744587	---NA---	209	No Blast Hit
C744595	---NA---	209	No Blast Hit
C744603	---NA---	209	No Blast Hit
C744613	---NA---	209	No Blast Hit
C744617	---NA---	209	No Blast Hit
C744623	---NA---	209	No Blast Hit
C744635	---NA---	209	No Blast Hit
C744663	---NA---	209	No Blast Hit
C744667	---NA---	209	No Blast Hit
C744685	---NA---	209	No Blast Hit
C744693	---NA---	209	No Blast Hit
C744697	---NA---	209	No Blast Hit
C744699	---NA---	209	No Blast Hit
C744701	---NA---	209	No Blast Hit
C744713	---NA---	209	No Blast Hit
C744741	---NA---	209	No Blast Hit
C744753	retrotransposon-like protein	209	gi|342365847|gb|AEL30380.1|hypothetical protein 205D04_20 [Arachis hypogaea]	AEL30380	5.94e-12	70.4918	69.3218	61	43
C744759	---NA---	209	No Blast Hit
C744767	---NA---	209	No Blast Hit
C744769	predicted protein	209	gi|224061791|ref|XP_002300602.1|predicted protein [Populus trichocarpa] gi|222842328|gb|EEE79875.1| predicted protein [Populus trichocarpa]	XP_002300602, EEE79875	1.13e-07	56.9231	55.8398	65	37
C744771	btb poz-like protein	209	gi|378728765|gb|EHY55224.1|hypothetical protein HMPREF1120_03369 [Exophiala dermatitidis NIH/UT8656]	EHY55224	5.71e-25	91.5254	102.834	59	54
C744779	retrotransposon ty3-gypsy subclass	209	gi|147807800|emb|CAN71056.1|hypothetical protein VITISV_016917 [Vitis vinifera]	CAN71056	1.45e-31	92.7536	120.553	69	64
C744789	---NA---	209	No Blast Hit
C744803	---NA---	209	No Blast Hit
C744809	---NA---	209	No Blast Hit
C744811	---NA---	209	No Blast Hit
C744825	hypothetical protein SERLA73DRAFT_80493	209	gi|336362832|gb|EGN91427.1|hypothetical protein SERLA73DRAFT_80493 [Serpula lacrymans var. lacrymans S7.3]	EGN91427	2.88e-11	66.6667	62.7734	57	38
C744829	---NA---	209	No Blast Hit
C744833	---NA---	209	No Blast Hit
C744837	---NA---	209	No Blast Hit
C744841	---NA---	209	No Blast Hit
C744845	---NA---	209	No Blast Hit
C744849	cytochrome p450 71d8-like	209	gi|255563804|ref|XP_002522903.1|cytochrome P450, putative [Ricinus communis] gi|223537888|gb|EEF39503.1| cytochrome P450, putative [Ricinus communis]	XP_002522903, EEF39503	4.12e-19	80	88.5817	70	56
C744851	polygalacturonase	209	gi|296084985|emb|CBI28400.3|unnamed protein product [Vitis vinifera]	CBI28400	3.05e-30	85.5072	114.005	69	59
C744875	---NA---	209	No Blast Hit
C744877	---NA---	209	No Blast Hit
C744879	---NA---	209	No Blast Hit
C744881	---NA---	209	No Blast Hit
C744889	protein	209	gi|255548694|ref|XP_002515403.1|serine/threonine-protein kinase bri1, putative [Ricinus communis] gi|223545347|gb|EEF46852.1| serine/threonine-protein kinase bri1, putative [Ricinus communis]	XP_002515403, EEF46852	3.04e-21	81.1594	95.5153	69	56
C744903	---NA---	209	No Blast Hit
C744907	---NA---	209	No Blast Hit
C744911	---NA---	209	No Blast Hit
C744925	---NA---	209	No Blast Hit
C744929	---NA---	209	No Blast Hit
C744941	---NA---	209	No Blast Hit
C744943	---NA---	209	No Blast Hit
C744947	beta- -xylosidase	209	gi|255573163|ref|XP_002527511.1|Beta-glucosidase, putative [Ricinus communis] gi|223533151|gb|EEF34909.1| Beta-glucosidase, putative [Ricinus communis]	XP_002527511, EEF34909	3.67e-11	78.2609	66.6254	69	54
C744951	---NA---	209	No Blast Hit
C744955	probable ccr4-associated factor 1 homolog 9-like	209	gi|224131812|ref|XP_002328114.1|predicted protein [Populus trichocarpa] gi|222837629|gb|EEE75994.1| predicted protein [Populus trichocarpa]	XP_002328114, EEE75994	2.26e-16	89.1304	78.5666	46	41
C744957	---NA---	209	No Blast Hit
C744975	---NA---	209	No Blast Hit
C744983	cc-nbs-lrr resistance protein	209	gi|255573844|ref|XP_002527841.1|conserved hypothetical protein [Ricinus communis] gi|223532765|gb|EEF34544.1| conserved hypothetical protein [Ricinus communis]	XP_002527841, EEF34544	3.59e-17	74.6269	81.2629	67	50
C744997	---NA---	209	No Blast Hit
C745027	---NA---	209	No Blast Hit
C745029	---NA---	209	No Blast Hit
C745031	---NA---	209	No Blast Hit
C745033	alpha beta hydrolase	209	gi|398388105|ref|XP_003847514.1|hypothetical protein MYCGRDRAFT_77672, partial [Zymoseptoria tritici IPO323] gi|339467387|gb|EGP82490.1| hypothetical protein MYCGRDRAFT_77672 [Zymoseptoria tritici IPO323]	XP_003847514, EGP82490	4.76e-26	84.058	104.76	69	58
C745041	---NA---	209	No Blast Hit
C745043	---NA---	209	No Blast Hit
C745055	hypothetical protein VITISV_026710	209	gi|147782107|emb|CAN76503.1|hypothetical protein VITISV_026710 [Vitis vinifera]	CAN76503	5.53e-08	63.1579	54.6842	57	36
C745063	---NA---	209	No Blast Hit
C745075	---NA---	209	No Blast Hit
C745083	---NA---	209	No Blast Hit
C745085	---NA---	209	No Blast Hit
C745093	---NA---	209	No Blast Hit
C745099	---NA---	209	No Blast Hit
C745131	---NA---	209	No Blast Hit
C745139	---NA---	209	No Blast Hit
C745145	superoxide dismutase	209	gi|398404456|ref|XP_003853694.1|mitochondrial superoxide dismutase [Mn] [Zymoseptoria tritici IPO323] gi|339473577|gb|EGP88670.1| hypothetical protein MYCGRDRAFT_69430 [Zymoseptoria tritici IPO323]	XP_003853694, EGP88670	1.9e-28	86.5672	110.923	67	58
C745159	---NA---	209	No Blast Hit
C745161	---NA---	209	No Blast Hit
C745173	cc-nbs-lrr resistance protein	209	gi|255574526|ref|XP_002528174.1|Disease resistance protein RFL1, putative [Ricinus communis] gi|223532386|gb|EEF34181.1| Disease resistance protein RFL1, putative [Ricinus communis]	XP_002528174, EEF34181	4.35e-17	75.3623	83.9593	69	52
C745179	---NA---	209	No Blast Hit
C745181	---NA---	209	No Blast Hit
C745191	---NA---	209	No Blast Hit
C745205	---NA---	209	No Blast Hit
C745207	retrotransposon protein	210	gi|374081772|dbj|BAL46523.1|hypothetical protein [Gentiana scabra x Gentiana triflora]	BAL46523	2.79e-29	88.4058	119.013	69	61
C745215	---NA---	210	No Blast Hit
C745233	---NA---	210	No Blast Hit
C745239	---NA---	210	No Blast Hit
C745253	---NA---	210	No Blast Hit
C745259	---NA---	210	No Blast Hit
C745275	---NA---	210	No Blast Hit
C745281	---NA---	210	No Blast Hit
C745329	retrotransposon gag protein	210	gi|113205348|gb|ABI34354.1|Retrotransposon gag protein [Solanum demissum]	ABI34354	7.02e-21	84.7458	95.1301	59	50
C745331	---NA---	210	No Blast Hit
C745353	protein	210	gi|255606387|ref|XP_002538556.1|S-locus-specific glycoprotein S13 precursor, putative [Ricinus communis] gi|223511592|gb|EEF23827.1| S-locus-specific glycoprotein S13 precursor, putative [Ricinus communis]	XP_002538556, EEF23827	3.97e-25	78.5714	103.605	70	55
C745355	potassium transporter 5-like	210	gi|255574499|ref|XP_002528161.1|Potassium transporter, putative [Ricinus communis] gi|223532418|gb|EEF34212.1| Potassium transporter, putative [Ricinus communis]	XP_002528161, EEF34212	4.49e-26	86.9565	108.997	69	60
C745367	---NA---	210	No Blast Hit
C745369	atp synthase beta	210	gi|242806501|ref|XP_002484756.1|ATP synthase F1, beta subunit, putative [Talaromyces stipitatus ATCC 10500] gi|218715381|gb|EED14803.1| ATP synthase F1, beta subunit, putative [Talaromyces stipitatus ATCC 10500]	XP_002484756, EED14803	7.73e-26	86.3636	107.071	66	57
C745375	---NA---	210	No Blast Hit
C745379	---NA---	210	No Blast Hit
C745385	---NA---	210	No Blast Hit
C745391	---NA---	210	No Blast Hit
C745401	---NA---	210	No Blast Hit
C745407	---NA---	210	No Blast Hit
C745413	---NA---	210	No Blast Hit
C745415	af478374_1gag-pol polyprotein	210	gi|113205323|gb|AAT38747.2|Polyprotein, putative [Solanum demissum]	AAT38747	9.53e-14	75.4717	74.3294	53	40
C745425	---NA---	210	No Blast Hit
C745433	---NA---	210	No Blast Hit
C745463	phosphoglycerate mutase-like protein	210	gi|255572816|ref|XP_002527340.1|catalytic, putative [Ricinus communis] gi|223533259|gb|EEF35012.1| catalytic, putative [Ricinus communis]	XP_002527340, EEF35012	6.15e-18	93.3333	83.1889	45	42
C745475	---NA---	210	No Blast Hit
C745479	---NA---	210	No Blast Hit
C745497	---NA---	210	No Blast Hit
C745511	adenylate translocator	210	gi|255553691|ref|XP_002517886.1|ADP,ATP carrier protein, putative [Ricinus communis] gi|223542868|gb|EEF44404.1| ADP,ATP carrier protein, putative [Ricinus communis]	XP_002517886, EEF44404	1.51e-25	81.1594	105.145	69	56
C745523	---NA---	210	No Blast Hit
C745527	---NA---	210	No Blast Hit
C745535	retrotransposon protein	210	gi|147775905|emb|CAN77969.1|hypothetical protein VITISV_027333 [Vitis vinifera]	CAN77969	1.39e-25	81.1594	106.686	69	56
C745537	---NA---	210	No Blast Hit
C745543	---NA---	210	No Blast Hit
C745547	---NA---	210	No Blast Hit
C745557	protein	210	gi|224078624|ref|XP_002335751.1|predicted protein [Populus trichocarpa] gi|222834671|gb|EEE73134.1| predicted protein [Populus trichocarpa]	XP_002335751, EEE73134	5.18e-17	81.1594	80.4925	69	56
C745593	60s ribosomal protein l15	210	gi|212540188|ref|XP_002150249.1|60S ribosomal protein L15 [Penicillium marneffei ATCC 18224] gi|210067548|gb|EEA21640.1| 60S ribosomal protein L15 [Penicillium marneffei ATCC 18224]	XP_002150249, EEA21640	2.79e-28	98.1481	109.768	54	53
C745603	---NA---	210	No Blast Hit
C745605	dna binding	210	gi|255573022|ref|XP_002527441.1|DNA binding protein, putative [Ricinus communis] gi|223533176|gb|EEF34933.1| DNA binding protein, putative [Ricinus communis]	XP_002527441, EEF34933	5.85e-25	84.2857	103.219	70	59
C745607	---NA---	210	No Blast Hit
C745611	cytochrome c oxidase family protein	210	gi|330915221|ref|XP_003296943.1|hypothetical protein PTT_07193 [Pyrenophora teres f. teres 0-1] gi|311330633|gb|EFQ94947.1| hypothetical protein PTT_07193 [Pyrenophora teres f. teres 0-1]	XP_003296943, EFQ94947	7.15e-24	80.6452	95.9005	62	50
C745617	---NA---	210	No Blast Hit
[truncated: 224,253+ more rows]
