# Supplementary material for: Gene-Metabolite Network Analysis Revealed Tissue-Specific Accumulation of Therapeutic Metabolites in Mallotus japonicus
Source: Int J Mol Sci. 2021 Aug 17;22(16):8835. doi: 10.3390/ijms22168835 (PMC8396295; doi:10.3390/ijms22168835)
Supplement: Supplementary file 1 [file ijms-22-08835-s001.zip › Supplementary_Table S8_KEGG_pathway_mapping_of_transcriptome_dataset with legend_Megha.xlsx]

## Sheet: One_transcript_per_row
Table S8 A comprehensive list of KEGG pathway being represented by the transcriptome of Mallotus japonicus and the number of unigenes being assigned to them.
Transcript_ID	Pathway	Pathway ID	#Enzs in Pathway	Enzyme
TR68504|c0_g1_i1	Pyruvate metabolism, Histidine metabolism, Chloroalkane and chloroalkene degradation, Ascorbate and aldarate metabolism, Lysine degradation, Fatty acid degradation, Tyrosine metabolism, Metabolism of xenobiotics by cytochrome P450, Arginine and proline metabolism, Limonene and pinene degradation, Tryptophan metabolism, Caprolactam degradation, Glycerolipid metabolism, Phenylalanine metabolism, be…	map00620, map00340, map00625, map00053, map00310, map00071, map00350, map00980, map00330, map00903, map00380, map00930, map00561, map00360, map00410, map00280, map00982, map00010, map00981	33, 13, 5, 18, 12, 14, 26, 8, 28, 2, 29, 8, 24, 22, 17, 21, 7, 28, 2	ec:4.1.1.32 - carboxykinase (GTP), ec:1.2.1.3 - dehydrogenase (NAD+), ec:1.1.1.79 - reductase (NADP+), ec:4.1.1.49 - carboxykinase (ATP), ec:2.3.1.12 - acetyltransferase, ec:1.1.2.3 - dehydrogenase (cytochrome), ec:1.1.1.37 - dehydrogenase, ec:1.1.1.28 - dehydrogenase, ec:3.1.2.1 - hydrolase, ec:2.7.9.1 - phosphate dikinase, ec:6.4.1.2 - carboxylase, ec:1.1.2.4 - dehydrogenase (cytochrome), ec:3.…
TR69856|c0_g1_i2	Aminoacyl-tRNA biosynthesis	map00970	23	ec:6.1.1.22 - ligase, ec:6.1.1.3 - ligase, ec:6.1.1.10 - ligase, ec:6.1.1.18 - ligase, ec:6.1.1.7 - ligase, ec:6.1.1.23 - ligase, ec:6.1.1.14 - ligase, ec:6.1.1.4 - ligase, ec:6.1.1.20 - ligase, ec:6.1.1.11 - ligase, ec:6.1.1.1 - ligase, ec:6.1.1.19 - ligase, ec:2.1.2.9 - formyltransferase, ec:6.1.1.9 - ligase, ec:6.1.1.15 - ligase, ec:6.1.1.5 - ligase, ec:6.1.1.21 - ligase, ec:6.1.1.12 - ligase,…
TR53622|c0_g1_i2	T cell receptor signaling pathway, Th1 and Th2 cell differentiation, PD-L1 expression and PD-1 checkpoint pathway in cancer	map04660, map04658, map05235	2, 1, 1	ec:2.7.10.2 - protein-tyrosine kinase, ec:3.1.3.16 - phosphatase, ec:3.1.3.16 - phosphatase, ec:3.1.3.16 - phosphatase
TR68649|c1_g2_i2	Fatty acid biosynthesis	map00061	12	ec:6.2.1.3 - ligase, ec:2.3.1.85 - synthase system, ec:6.4.1.2 - carboxylase, ec:3.1.2.14 - hydrolase, ec:4.2.1.59 - dehydratase, ec:2.3.1.86 - synthase system, ec:2.3.1.180 - synthase III, ec:2.3.1.39 - S-malonyltransferase, ec:2.3.1.41 - synthase I, ec:1.1.1.100 - reductase, ec:1.14.19.2 - 9-desaturase, ec:1.3.1.9 - reductase (NADH)
TR53622|c0_g1_i1	T cell receptor signaling pathway, Th1 and Th2 cell differentiation, PD-L1 expression and PD-1 checkpoint pathway in cancer	map04660, map04658, map05235	2, 1, 1	ec:2.7.10.2 - protein-tyrosine kinase, ec:3.1.3.16 - phosphatase, ec:3.1.3.16 - phosphatase, ec:3.1.3.16 - phosphatase
TR50474|c0_g2_i1	Phenylalanine, tyrosine and tryptophan biosynthesis	map00400	27	ec:1.1.1.24 - dehydrogenase, ec:4.1.1.48 - synthase, ec:2.6.1.57 - transaminase, ec:1.1.1.282 - dehydrogenase, ec:4.1.3.27 - synthase, ec:2.6.1.5 - transaminase, ec:2.6.1.79 - aminotransferase, ec:2.5.1.19 - 1-carboxyvinyltransferase, ec:1.3.1.12 - dehydrogenase, ec:4.2.3.5 - synthase, ec:2.6.1.1 - transaminase, ec:1.1.1.25 - dehydrogenase, ec:2.5.1.54 - synthase, ec:2.7.1.71 - kinase, ec:2.6.1.9…
Mj_1_GCCAAT_L005_R1_001_(paired)_trimmed_(paired)_contig_5587	Fructose and mannose metabolism	map00051	27	ec:5.3.1.5 - isomerase, ec:1.1.1.21 - reductase, ec:2.7.1.7 - mannokinase (phosphorylating), ec:5.4.2.8 - mannose phosphomutase, ec:2.7.7.22 - guanylyltransferase (GDP), ec:1.1.1.67 - 2-dehydrogenase, ec:3.2.1.78 - endo-1,4-beta-mannosidase, ec:1.1.1.122 - 1-dehydrogenase, ec:5.3.1.1 - isomerase, ec:2.7.7.13 - guanylyltransferase, ec:2.7.1.11 - phosphohexokinase, ec:2.7.1.4 - fructokinase (phosph…
scaffold11099	Thiamine metabolism, Terpenoid backbone biosynthesis	map00730, map00900	12, 27	ec:3.6.1.15 - phosphatase, ec:2.7.4.7 - kinase, ec:2.8.1.7 - desulfurase, ec:2.7.6.2 - diphosphokinase, ec:2.7.1.50 - kinase, ec:2.7.4.3 - kinase, ec:2.7.1.49 - kinase, ec:3.5.99.2 - aminohydrolase, ec:2.5.1.3 - phosphate synthase, ec:3.1.3.2 - phosphatase, ec:4.1.99.19 - synthase, ec:2.2.1.7 - synthase, ec:2.7.4.2 - kinase, ec:2.5.1.84 - diphosphate synthase [geranyl-diphosphate specific], ec:4.…
TR27690|c0_g1_i1	Lipoic acid metabolism	map00785	2	ec:2.8.1.8 - synthase, ec:2.3.1.181 - transferase
scaffold11098	Thiamine metabolism, Terpenoid backbone biosynthesis	map00730, map00900	12, 27	ec:3.6.1.15 - phosphatase, ec:2.7.4.7 - kinase, ec:2.8.1.7 - desulfurase, ec:2.7.6.2 - diphosphokinase, ec:2.7.1.50 - kinase, ec:2.7.4.3 - kinase, ec:2.7.1.49 - kinase, ec:3.5.99.2 - aminohydrolase, ec:2.5.1.3 - phosphate synthase, ec:3.1.3.2 - phosphatase, ec:4.1.99.19 - synthase, ec:2.2.1.7 - synthase, ec:2.7.4.2 - kinase, ec:2.5.1.84 - diphosphate synthase [geranyl-diphosphate specific], ec:4.…
C803168	Anthocyanin biosynthesis	map00942	4	ec:2.4.1.238 - 3,5-di-O-glucoside 3'-O-glucosyltransferase, ec:2.3.1.153 - 5-(6'''-hydroxycinnamoyltransferase), ec:2.4.1.115 - 3-O-glucosyltransferase, ec:2.3.1.171 - 6''-O-malonyltransferase
TR56426|c0_g1_i2	Drug metabolism - other enzymes	map00983	19	ec:2.7.1.48 - kinase, ec:3.5.2.2 - hydantoinase, ec:3.1.1.1 - ali-esterase, ec:1.17.4.1 - reductase, ec:1.3.1.2 - dehydrogenase (NADP+), ec:3.5.1.6 - N-carbamoyl-beta-alanine amidohydrolase, ec:3.2.1.31 - beta-glucuronide glucuronohydrolase glucuronidase, ec:3.5.4.5 - deaminase, ec:1.17.3.2 - oxidase, ec:2.7.4.14 - kinase, ec:1.1.1.205 - dehydrogenase, ec:2.4.2.10 - phosphoribosyltransferase, ec:…
Mj_1_GCCAAT_L005_R1_001_(paired)_trimmed_(paired)_contig_4251	Nicotinate and nicotinamide metabolism	map00760	17	ec:2.7.7.1 - adenylyltransferase, ec:3.6.1.9 - diphosphatase, ec:2.7.1.23 - kinase, ec:3.1.3.5 - uridine 5'-nucleotidase, ec:1.2.1.24 - dehydrogenase (NAD+), ec:1.2.1.16 - dehydrogenase [NAD(P)+], ec:3.2.2.1 - nucleosidase, ec:2.4.2.19 - diphosphorylase (carboxylating), ec:1.6.1.1 - transhydrogenase (Si-specific), ec:6.3.5.1 - synthase (glutamine-hydrolysing), ec:2.7.7.18 - adenylyltransferase, e…
TR76898|c1_g3_i1	T cell receptor signaling pathway	map04660	2	ec:2.7.10.2 - protein-tyrosine kinase, ec:3.1.3.16 - phosphatase
TR74378|c1_g3_i2	Alanine, aspartate and glutamate metabolism, Arginine biosynthesis, Nitrogen metabolism, Pyrimidine metabolism	map00250, map00220, map00910, map00240	29, 21, 18, 31	ec:1.4.1.14 - synthase (NADH), ec:4.1.1.15 - decarboxylase, ec:6.3.4.5 - synthase, ec:1.4.1.2 - dehydrogenase, ec:1.2.1.24 - dehydrogenase (NAD+), ec:6.3.1.2 - synthetase, ec:3.5.1.3 - alpha-keto acid-omega-amidase, ec:1.2.1.16 - dehydrogenase [NAD(P)+], ec:6.3.4.16 - synthase (ammonia), ec:6.3.5.5 - synthase (glutamine-hydrolysing), ec:2.6.1.1 - transaminase, ec:4.3.2.1 - lyase, ec:1.4.3.2 - oxi…
TR77917|c0_g1_i12	Aflatoxin biosynthesis, Pyruvate metabolism, Propanoate metabolism, Fatty acid biosynthesis, Carbon fixation pathways in prokaryotes	map00254, map00620, map00640, map00061, map00720	2, 33, 21, 12, 21	ec:6.4.1.2 - carboxylase, ec:2.1.1.110 - 8-O-methyltransferase, ec:4.1.1.32 - carboxykinase (GTP), ec:1.2.1.3 - dehydrogenase (NAD+), ec:1.1.1.79 - reductase (NADP+), ec:4.1.1.49 - carboxykinase (ATP), ec:2.3.1.12 - acetyltransferase, ec:1.1.2.3 - dehydrogenase (cytochrome), ec:1.1.1.37 - dehydrogenase, ec:1.1.1.28 - dehydrogenase, ec:3.1.2.1 - hydrolase, ec:2.7.9.1 - phosphate dikinase, ec:6.4.1…
TR124020|c0_g1_i1	Folate biosynthesis	map00790	17	ec:3.4.19.9 - gamma-glutamyl hydrolase, ec:2.5.1.15 - synthase, ec:1.1.1.21 - reductase, ec:6.3.2.12 - synthase, ec:2.10.1.1 - molybdotransferase, ec:4.2.1.96 - dehydratase, ec:3.5.4.25 - cyclohydrolase II, ec:3.5.4.16 - cyclohydrolase I, ec:6.3.2.17 - synthase, ec:2.7.6.3 - diphosphokinase, ec:2.6.1.85 - synthase, ec:1.1.1.184 - reductase (NADPH), ec:2.7.7.75 - adenylyltransferase, ec:4.1.2.25 -…
TR74787|c0_g2_i10	T cell receptor signaling pathway, Th1 and Th2 cell differentiation, PD-L1 expression and PD-1 checkpoint pathway in cancer	map04660, map04658, map05235	2, 1, 1	ec:2.7.10.2 - protein-tyrosine kinase, ec:3.1.3.16 - phosphatase, ec:3.1.3.16 - phosphatase, ec:3.1.3.16 - phosphatase
TR76217|c2_g1_i6	Glycerolipid metabolism	map00561	24	ec:2.3.1.20 - O-acyltransferase, ec:1.2.1.3 - dehydrogenase (NAD+), ec:2.7.1.31 - 3-kinase, ec:2.3.1.51 - O-acyltransferase, ec:2.7.7.9 - uridylyltransferase, ec:1.1.1.21 - reductase, ec:2.4.1.46 - synthase, ec:3.2.1.22 - melibiase, ec:2.7.1.107 - kinase (ATP), ec:3.1.1.23 - lipase, ec:2.3.1.22 - O-acyltransferase, ec:2.4.1.241 - synthase, ec:3.13.1.1 - synthase, ec:2.4.1.184 - galactosyltransfer…
TR77917|c0_g1_i10	Aflatoxin biosynthesis, Pyruvate metabolism, Propanoate metabolism, Fatty acid biosynthesis, Carbon fixation pathways in prokaryotes	map00254, map00620, map00640, map00061, map00720	2, 33, 21, 12, 21	ec:6.4.1.2 - carboxylase, ec:2.1.1.110 - 8-O-methyltransferase, ec:4.1.1.32 - carboxykinase (GTP), ec:1.2.1.3 - dehydrogenase (NAD+), ec:1.1.1.79 - reductase (NADP+), ec:4.1.1.49 - carboxykinase (ATP), ec:2.3.1.12 - acetyltransferase, ec:1.1.2.3 - dehydrogenase (cytochrome), ec:1.1.1.37 - dehydrogenase, ec:1.1.1.28 - dehydrogenase, ec:3.1.2.1 - hydrolase, ec:2.7.9.1 - phosphate dikinase, ec:6.4.1…
TR77917|c0_g1_i11	Aflatoxin biosynthesis, Pyruvate metabolism, Propanoate metabolism, Fatty acid biosynthesis, Carbon fixation pathways in prokaryotes	map00254, map00620, map00640, map00061, map00720	2, 33, 21, 12, 21	ec:6.4.1.2 - carboxylase, ec:2.1.1.110 - 8-O-methyltransferase, ec:4.1.1.32 - carboxykinase (GTP), ec:1.2.1.3 - dehydrogenase (NAD+), ec:1.1.1.79 - reductase (NADP+), ec:4.1.1.49 - carboxykinase (ATP), ec:2.3.1.12 - acetyltransferase, ec:1.1.2.3 - dehydrogenase (cytochrome), ec:1.1.1.37 - dehydrogenase, ec:1.1.1.28 - dehydrogenase, ec:3.1.2.1 - hydrolase, ec:2.7.9.1 - phosphate dikinase, ec:6.4.1…
TR68557|c0_g2_i5	Flavonoid biosynthesis	map00941	10	ec:1.1.1.234 - 4-reductase, ec:1.17.1.3 - reductase, ec:2.3.1.170 - synthase, ec:2.1.1.104 - O-methyltransferase, ec:2.3.1.74 - synthase, ec:5.5.1.6 - isomerase, ec:1.3.1.77 - reductase [(2R,3R)-flavan-3-ol-forming], ec:1.1.1.219 - 4-reductase, ec:2.3.1.133 - O-hydroxycinnamoyltransferase, ec:1.14.11.9 - 3-dioxygenase
TR36819|c0_g1_i1	Ascorbate and aldarate metabolism, Glutathione metabolism	map00053, map00480	18, 19	ec:1.11.1.11 - peroxidase, ec:1.2.1.3 - dehydrogenase (NAD+), ec:4.1.2.20 - aldolase, ec:1.8.5.1 - dehydrogenase (ascorbate), ec:1.1.1.122 - 1-dehydrogenase, ec:1.10.3.3 - oxidase, ec:2.7.7.44 - uridylyltransferase, ec:1.1.3.8 - oxidase, ec:1.1.1.22 - 6-dehydrogenase, ec:1.3.2.3 - dehydrogenase, ec:1.6.5.4 - reductase (NADH), ec:1.13.99.1 - oxygenase, ec:5.1.3.18 - 3,5-epimerase, ec:2.4.1.17 - 1-…
TR76217|c2_g1_i2	Glycerolipid metabolism	map00561	24	ec:2.3.1.20 - O-acyltransferase, ec:1.2.1.3 - dehydrogenase (NAD+), ec:2.7.1.31 - 3-kinase, ec:2.3.1.51 - O-acyltransferase, ec:2.7.7.9 - uridylyltransferase, ec:1.1.1.21 - reductase, ec:2.4.1.46 - synthase, ec:3.2.1.22 - melibiase, ec:2.7.1.107 - kinase (ATP), ec:3.1.1.23 - lipase, ec:2.3.1.22 - O-acyltransferase, ec:2.4.1.241 - synthase, ec:3.13.1.1 - synthase, ec:2.4.1.184 - galactosyltransfer…
C827125	Phosphatidylinositol signaling system, Inositol phosphate metabolism	map04070, map00562	20, 25	ec:2.7.1.127 - 3-kinase, ec:2.7.1.158 - 2-kinase, ec:3.1.3.56 - 5-phosphatase, ec:2.7.1.107 - kinase (ATP), ec:2.7.1.137 - 3-kinase, ec:2.7.1.151 - multikinase, ec:3.1.4.11 - phospholipase C, ec:2.7.1.159 - 5/6-kinase, ec:3.1.3.36 - 5-phosphatase, ec:2.7.11.13 - kinase C, ec:3.1.3.57 - 1-phosphatase, ec:2.7.1.67 - 4-kinase, ec:2.7.8.11 - 3-phosphatidyltransferase, ec:2.7.7.41 - cytidylyltransfera…
TR76217|c2_g1_i1	Glycerolipid metabolism	map00561	24	ec:2.3.1.20 - O-acyltransferase, ec:1.2.1.3 - dehydrogenase (NAD+), ec:2.7.1.31 - 3-kinase, ec:2.3.1.51 - O-acyltransferase, ec:2.7.7.9 - uridylyltransferase, ec:1.1.1.21 - reductase, ec:2.4.1.46 - synthase, ec:3.2.1.22 - melibiase, ec:2.7.1.107 - kinase (ATP), ec:3.1.1.23 - lipase, ec:2.3.1.22 - O-acyltransferase, ec:2.4.1.241 - synthase, ec:3.13.1.1 - synthase, ec:2.4.1.184 - galactosyltransfer…
TR68557|c0_g2_i2	alpha-Linolenic acid metabolism, Retinol metabolism, Flavonoid biosynthesis, Chloroalkane and chloroalkene degradation, Glycine, serine and threonine metabolism, Fatty acid degradation, Tyrosine metabolism, Metabolism of xenobiotics by cytochrome P450, Naphthalene degradation, Drug metabolism - cytochrome P450, Glycolysis / Gluconeogenesis	map00592, map00830, map00941, map00625, map00260, map00071, map00350, map00980, map00626, map00982, map00010	11, 6, 10, 5, 39, 14, 26, 8, 2, 7, 28	ec:4.2.1.92 - dehydratase, ec:1.3.3.6 - oxidase, ec:2.3.1.16 - C-acyltransferase, ec:3.1.1.32 - A1, ec:1.3.1.42 - reductase, ec:1.1.1.1 - dehydrogenase, ec:1.13.11.12 - 13S-lipoxygenase, ec:5.3.99.6 - cyclase, ec:4.2.1.17 - hydratase, ec:2.1.1.141 - O-methyltransferase, ec:3.1.1.4 - A2, ec:1.2.1.36 - dehydrogenase, ec:1.14.14.1 - monooxygenase, ec:1.1.1.1 - dehydrogenase, ec:1.2.3.1 - oxidase, ec…
Mj_1_GCCAAT_L005_R1_001_(paired)_trimmed_(paired)_contig_5576	Pentose and glucuronate interconversions	map00040	20	ec:2.7.1.17 - xylulokinase (phosphorylating), ec:5.1.3.1 - 3-epimerase, ec:5.3.1.5 - isomerase, ec:2.7.7.9 - uridylyltransferase, ec:1.1.1.21 - reductase, ec:3.2.1.31 - beta-glucuronide glucuronohydrolase glucuronidase, ec:1.1.1.12 - 4-dehydrogenase, ec:2.7.7.44 - uridylyltransferase, ec:1.1.1.22 - 6-dehydrogenase, ec:1.1.1.9 - reductase, ec:3.1.1.11 - pectin demethoxylase, ec:3.2.1.15 - pectin d…
TR77917|c0_g1_i16	Aflatoxin biosynthesis, Pyruvate metabolism, Propanoate metabolism, Fatty acid biosynthesis, Carbon fixation pathways in prokaryotes	map00254, map00620, map00640, map00061, map00720	2, 33, 21, 12, 21	ec:6.4.1.2 - carboxylase, ec:2.1.1.110 - 8-O-methyltransferase, ec:4.1.1.32 - carboxykinase (GTP), ec:1.2.1.3 - dehydrogenase (NAD+), ec:1.1.1.79 - reductase (NADP+), ec:4.1.1.49 - carboxykinase (ATP), ec:2.3.1.12 - acetyltransferase, ec:1.1.2.3 - dehydrogenase (cytochrome), ec:1.1.1.37 - dehydrogenase, ec:1.1.1.28 - dehydrogenase, ec:3.1.2.1 - hydrolase, ec:2.7.9.1 - phosphate dikinase, ec:6.4.1…
TR68557|c0_g2_i9	alpha-Linolenic acid metabolism, Steroid degradation, Chloroalkane and chloroalkene degradation, Glycine, serine and threonine metabolism, Fatty acid degradation, Tyrosine metabolism, Metabolism of xenobiotics by cytochrome P450, Steroid hormone biosynthesis, Retinol metabolism, Flavonoid biosynthesis, Naphthalene degradation, Drug metabolism - cytochrome P450, Glycolysis / Gluconeogenesis	map00592, map00984, map00625, map00260, map00071, map00350, map00980, map00140, map00830, map00941, map00626, map00982, map00010	11, 3, 5, 39, 14, 26, 8, 12, 6, 10, 2, 7, 28	ec:4.2.1.92 - dehydratase, ec:1.3.3.6 - oxidase, ec:2.3.1.16 - C-acyltransferase, ec:3.1.1.32 - A1, ec:1.3.1.42 - reductase, ec:1.1.1.1 - dehydrogenase, ec:1.13.11.12 - 13S-lipoxygenase, ec:5.3.99.6 - cyclase, ec:4.2.1.17 - hydratase, ec:2.1.1.141 - O-methyltransferase, ec:3.1.1.4 - A2, ec:1.1.1.51 - 17)beta-hydroxysteroid dehydrogenase, ec:1.1.1.145 - dehydrogenase, ec:1.3.99.5 - 4-dehydrogenase…
TR69279|c0_g1_i5	Pantothenate and CoA biosynthesis	map00770	19	ec:6.3.2.1 - ligase (AMP-forming), ec:3.5.2.2 - hydantoinase, ec:3.6.1.9 - diphosphatase, ec:1.3.1.2 - dehydrogenase (NADP+), ec:3.5.1.6 - N-carbamoyl-beta-alanine amidohydrolase, ec:4.2.1.9 - dehydratase, ec:6.3.2.5 - ligase (CTP), ec:1.1.1.169 - 2-reductase, ec:2.7.1.24 - kinase, ec:2.6.1.42 - transaminase, ec:1.1.1.86 - reductoisomerase (NADP+), ec:2.6.1.6 - transaminase, ec:2.2.1.6 - synthase…
Mj_1_GCCAAT_L005_R1_001_(paired)_trimmed_(paired)_contig_4248	Pyruvate metabolism, Purine metabolism, Glycolysis / Gluconeogenesis	map00620, map00230, map00010	33, 60, 28	ec:4.1.1.32 - carboxykinase (GTP), ec:1.2.1.3 - dehydrogenase (NAD+), ec:1.1.1.79 - reductase (NADP+), ec:4.1.1.49 - carboxykinase (ATP), ec:2.3.1.12 - acetyltransferase, ec:1.1.2.3 - dehydrogenase (cytochrome), ec:1.1.1.37 - dehydrogenase, ec:1.1.1.28 - dehydrogenase, ec:3.1.2.1 - hydrolase, ec:2.7.9.1 - phosphate dikinase, ec:6.4.1.2 - carboxylase, ec:1.1.2.4 - dehydrogenase (cytochrome), ec:3.…
TR68557|c0_g2_i6	alpha-Linolenic acid metabolism, Retinol metabolism, Flavonoid biosynthesis, Chloroalkane and chloroalkene degradation, Glycine, serine and threonine metabolism, Fatty acid degradation, Tyrosine metabolism, Metabolism of xenobiotics by cytochrome P450, Naphthalene degradation, Drug metabolism - cytochrome P450, Glycolysis / Gluconeogenesis	map00592, map00830, map00941, map00625, map00260, map00071, map00350, map00980, map00626, map00982, map00010	11, 6, 10, 5, 39, 14, 26, 8, 2, 7, 28	ec:4.2.1.92 - dehydratase, ec:1.3.3.6 - oxidase, ec:2.3.1.16 - C-acyltransferase, ec:3.1.1.32 - A1, ec:1.3.1.42 - reductase, ec:1.1.1.1 - dehydrogenase, ec:1.13.11.12 - 13S-lipoxygenase, ec:5.3.99.6 - cyclase, ec:4.2.1.17 - hydratase, ec:2.1.1.141 - O-methyltransferase, ec:3.1.1.4 - A2, ec:1.2.1.36 - dehydrogenase, ec:1.14.14.1 - monooxygenase, ec:1.1.1.1 - dehydrogenase, ec:1.2.3.1 - oxidase, ec…
TR69279|c0_g1_i1	Pantothenate and CoA biosynthesis	map00770	19	ec:6.3.2.1 - ligase (AMP-forming), ec:3.5.2.2 - hydantoinase, ec:3.6.1.9 - diphosphatase, ec:1.3.1.2 - dehydrogenase (NADP+), ec:3.5.1.6 - N-carbamoyl-beta-alanine amidohydrolase, ec:4.2.1.9 - dehydratase, ec:6.3.2.5 - ligase (CTP), ec:1.1.1.169 - 2-reductase, ec:2.7.1.24 - kinase, ec:2.6.1.42 - transaminase, ec:1.1.1.86 - reductoisomerase (NADP+), ec:2.6.1.6 - transaminase, ec:2.2.1.6 - synthase…
TR69279|c0_g1_i4	Pantothenate and CoA biosynthesis	map00770	19	ec:6.3.2.1 - ligase (AMP-forming), ec:3.5.2.2 - hydantoinase, ec:3.6.1.9 - diphosphatase, ec:1.3.1.2 - dehydrogenase (NADP+), ec:3.5.1.6 - N-carbamoyl-beta-alanine amidohydrolase, ec:4.2.1.9 - dehydratase, ec:6.3.2.5 - ligase (CTP), ec:1.1.1.169 - 2-reductase, ec:2.7.1.24 - kinase, ec:2.6.1.42 - transaminase, ec:1.1.1.86 - reductoisomerase (NADP+), ec:2.6.1.6 - transaminase, ec:2.2.1.6 - synthase…
Mj_1_GCCAAT_L005_R1_001_(paired)_trimmed_(paired)_contig_5573	Glycine, serine and threonine metabolism, Cysteine and methionine metabolism, Monobactam biosynthesis, Lysine biosynthesis	map00260, map00270, map00261, map00300	39, 45, 5, 12	ec:2.3.1.37 - synthase, ec:2.7.1.31 - 3-kinase, ec:1.2.1.11 - dehydrogenase, ec:4.3.1.18 - ammonia-lyase, ec:4.1.2.5 - aldolase, ec:2.7.1.39 - kinase, ec:2.1.2.1 - hydroxymethyltransferase, ec:1.1.1.81 - reductase, ec:2.1.1.5 - S-methyltransferase, ec:2.6.1.45 - transaminase, ec:1.5.3.10 - oxidase, ec:2.1.2.10 - S-aminomethyldihydrolipoylprotein:(6S)-tetrahydrofolate aminomethyltransferase (ammon…
TR77389|c2_g1_i2	Mannose type O-glycan biosynthesis, Glycosaminoglycan biosynthesis - heparan sulfate / heparin, Glycosaminoglycan biosynthesis - chondroitin sulfate / dermatan sulfate	map00515, map00534, map00532	3, 5, 3	ec:2.4.1.152 - 3-alpha-L-fucosyltransferase, ec:2.4.1.135 - 3-beta-glucuronosyltransferase, ec:2.4.1.109 - mannosyltransferase, ec:2.4.1.135 - 3-beta-glucuronosyltransferase, ec:2.4.1.223 - 4-alpha-N-acetylglucosaminyltransferase, ec:2.4.2.26 - xylosyltransferase, ec:2.4.1.224 - 4-alpha-N-acetylglucosaminyltransferase, ec:2.4.1.134 - 3-beta-galactosyltransferase, ec:2.4.1.135 - 3-beta-glucuronosy…
TR65231|c0_g1_i13	Phenylpropanoid biosynthesis	map00940	17	ec:3.2.1.126 - beta-glucosidase, ec:1.1.1.195 - dehydrogenase, ec:1.11.1.7 - lactoperoxidase, ec:2.1.1.146 - O-methyltransferase, ec:1.2.1.68 - dehydrogenase, ec:4.3.1.24 - ammonia-lyase, ec:2.1.1.104 - O-methyltransferase, ec:2.4.1.111 - glucosyltransferase, ec:2.4.1.128 - glucosyltransferase, ec:2.3.1.92 - O-sinapoyltransferase, ec:1.2.1.44 - reductase, ec:2.3.1.99 - O-hydroxycinnamoyltransfera…
Mj_1_GCCAAT_L005_R1_001_(paired)_trimmed_(paired)_contig_90299	Pyruvate metabolism	map00620	33	ec:4.1.1.32 - carboxykinase (GTP), ec:1.2.1.3 - dehydrogenase (NAD+), ec:1.1.1.79 - reductase (NADP+), ec:4.1.1.49 - carboxykinase (ATP), ec:2.3.1.12 - acetyltransferase, ec:1.1.2.3 - dehydrogenase (cytochrome), ec:1.1.1.37 - dehydrogenase, ec:1.1.1.28 - dehydrogenase, ec:3.1.2.1 - hydrolase, ec:2.7.9.1 - phosphate dikinase, ec:6.4.1.2 - carboxylase, ec:1.1.2.4 - dehydrogenase (cytochrome), ec:3.…
TR102961|c0_g1_i1	Pentose phosphate pathway, Glutathione metabolism	map00030, map00480	21, 19	ec:5.1.3.1 - 3-epimerase, ec:2.7.1.11 - phosphohexokinase, ec:5.3.1.9 - isomerase, ec:3.1.3.11 - hexose diphosphatase, ec:1.1.1.47 - 1-dehydrogenase [NAD(P)+], ec:5.3.1.6 - isomerase, ec:2.7.1.15 - deoxyribokinase, ec:2.2.1.1 - glycolaldehydetransferase, ec:4.1.2.13 - aldolase, ec:2.7.1.12 - gluconokinase (phosphorylating), ec:2.7.1.90 - 1-phosphotransferase, ec:5.4.2.2 - (alpha-D-glucose-1,6-bis…
TR18555|c0_g2_i1	Propanoate metabolism, C5-Branched dibasic acid metabolism, Carbon fixation pathways in prokaryotes, Citrate cycle (TCA cycle)	map00640, map00660, map00720, map00020	21, 5, 21, 18	ec:4.1.1.9 - decarboxylase, ec:2.3.1.168 - (2-methylpropanoyl)transferase, ec:1.3.3.6 - oxidase, ec:4.2.1.79 - dehydratase, ec:6.4.1.2 - carboxylase, ec:4.1.3.30 - lyase, ec:2.6.1.19 - transaminase, ec:6.2.1.4 - ligase (GDP-forming), ec:6.2.1.1 - ligase, ec:6.4.1.3 - carboxylase, ec:1.8.1.4 - dehydrogenase, ec:1.2.4.4 - dehydrogenase (2-methylpropanoyl-transferring), ec:2.8.3.8 - CoA-transferase,…
TR73648|c3_g2_i1	Galactose metabolism, Starch and sucrose metabolism	map00052, map00500	20, 35	ec:5.1.3.2 - 4-epimerase, ec:3.2.1.26 - invertase, ec:2.7.7.9 - uridylyltransferase, ec:1.1.1.21 - reductase, ec:3.2.1.23 - lactase (ambiguous), ec:3.2.1.22 - melibiase, ec:2.7.1.11 - phosphohexokinase, ec:2.4.1.67 - galactosyltransferase, ec:5.1.3.3 - 1-epimerase, ec:2.7.7.10 - uridylyltransferase, ec:2.7.1.1 - hexokinase type IV glucokinase, ec:2.4.1.123 - 3-alpha-galactosyltransferase, ec:2.4.…
TR34190|c0_g2_i1	Indole alkaloid biosynthesis	map00901	6	ec:1.14.11.20 - 4-hydroxylase, ec:3.1.1.78 - esterase, ec:2.4.1.219 - glucosyltransferase, ec:4.3.3.2 - synthase, ec:3.2.1.125 - beta-glucosidase, ec:3.2.1.105 - beta-glucosidase
scaffold11075	Lipoic acid metabolism	map00785	2	ec:2.8.1.8 - synthase, ec:2.3.1.181 - transferase
TR77567|c1_g1_i1	Steroid hormone biosynthesis, Drug metabolism - other enzymes, Retinol metabolism, Ascorbate and aldarate metabolism, Metabolism of xenobiotics by cytochrome P450, Pentose and glucuronate interconversions, Drug metabolism - cytochrome P450, Porphyrin and chlorophyll metabolism	map00140, map00983, map00830, map00053, map00980, map00040, map00982, map00860	12, 19, 6, 18, 8, 20, 7, 31	ec:1.1.1.51 - 17)beta-hydroxysteroid dehydrogenase, ec:1.14.14.1 - monooxygenase, ec:1.3.1.3 - 5beta-reductase, ec:2.1.1.6 - O-methyltransferase, ec:1.1.1.145 - dehydrogenase, ec:1.1.1.62 - 17-dehydrogenase, ec:2.4.1.17 - 1-naphthol glucuronyltransferase, ec:1.1.1.53 - 20beta)-hydroxysteroid dehydrogenase, ec:1.1.1.149 - dehydrogenase, ec:1.3.1.22 - 4-dehydrogenase (NADP+), ec:1.1.1.146 - dehydro…
TR77567|c1_g1_i2	Steroid hormone biosynthesis, Drug metabolism - other enzymes, Retinol metabolism, Ascorbate and aldarate metabolism, Metabolism of xenobiotics by cytochrome P450, Pentose and glucuronate interconversions, Drug metabolism - cytochrome P450, Porphyrin and chlorophyll metabolism	map00140, map00983, map00830, map00053, map00980, map00040, map00982, map00860	12, 19, 6, 18, 8, 20, 7, 31	ec:1.1.1.51 - 17)beta-hydroxysteroid dehydrogenase, ec:1.14.14.1 - monooxygenase, ec:1.3.1.3 - 5beta-reductase, ec:2.1.1.6 - O-methyltransferase, ec:1.1.1.145 - dehydrogenase, ec:1.1.1.62 - 17-dehydrogenase, ec:2.4.1.17 - 1-naphthol glucuronyltransferase, ec:1.1.1.53 - 20beta)-hydroxysteroid dehydrogenase, ec:1.1.1.149 - dehydrogenase, ec:1.3.1.22 - 4-dehydrogenase (NADP+), ec:1.1.1.146 - dehydro…
TR77567|c1_g1_i4	Steroid hormone biosynthesis, Drug metabolism - other enzymes, Retinol metabolism, Ascorbate and aldarate metabolism, Metabolism of xenobiotics by cytochrome P450, Pentose and glucuronate interconversions, Drug metabolism - cytochrome P450, Porphyrin and chlorophyll metabolism	map00140, map00983, map00830, map00053, map00980, map00040, map00982, map00860	12, 19, 6, 18, 8, 20, 7, 31	ec:1.1.1.51 - 17)beta-hydroxysteroid dehydrogenase, ec:1.14.14.1 - monooxygenase, ec:1.3.1.3 - 5beta-reductase, ec:2.1.1.6 - O-methyltransferase, ec:1.1.1.145 - dehydrogenase, ec:1.1.1.62 - 17-dehydrogenase, ec:2.4.1.17 - 1-naphthol glucuronyltransferase, ec:1.1.1.53 - 20beta)-hydroxysteroid dehydrogenase, ec:1.1.1.149 - dehydrogenase, ec:1.3.1.22 - 4-dehydrogenase (NADP+), ec:1.1.1.146 - dehydro…
TR69817|c1_g2_i5	T cell receptor signaling pathway	map04660	2	ec:2.7.10.2 - protein-tyrosine kinase, ec:3.1.3.16 - phosphatase
TR27780|c0_g1_i1	Pyruvate metabolism, Propanoate metabolism, Lysine degradation, Fatty acid degradation, Glyoxylate and dicarboxylate metabolism, Benzoate degradation, Synthesis and degradation of ketone bodies, Terpenoid backbone biosynthesis, Valine, leucine and isoleucine degradation, Butanoate metabolism, Carbon fixation pathways in prokaryotes, Tryptophan metabolism	map00620, map00640, map00310, map00071, map00630, map00362, map00072, map00900, map00280, map00650, map00720, map00380	33, 21, 12, 14, 34, 10, 4, 27, 21, 19, 21, 29	ec:4.1.1.32 - carboxykinase (GTP), ec:1.2.1.3 - dehydrogenase (NAD+), ec:1.1.1.79 - reductase (NADP+), ec:4.1.1.49 - carboxykinase (ATP), ec:2.3.1.12 - acetyltransferase, ec:1.1.2.3 - dehydrogenase (cytochrome), ec:1.1.1.37 - dehydrogenase, ec:1.1.1.28 - dehydrogenase, ec:3.1.2.1 - hydrolase, ec:2.7.9.1 - phosphate dikinase, ec:6.4.1.2 - carboxylase, ec:1.1.2.4 - dehydrogenase (cytochrome), ec:3.…
TR65448|c1_g2_i5	Fatty acid biosynthesis, Biotin metabolism	map00061, map00780	12, 9	ec:6.2.1.3 - ligase, ec:2.3.1.85 - synthase system, ec:6.4.1.2 - carboxylase, ec:3.1.2.14 - hydrolase, ec:4.2.1.59 - dehydratase, ec:2.3.1.86 - synthase system, ec:2.3.1.180 - synthase III, ec:2.3.1.39 - S-malonyltransferase, ec:2.3.1.41 - synthase I, ec:1.1.1.100 - reductase, ec:1.14.19.2 - 9-desaturase, ec:1.3.1.9 - reductase (NADH), ec:2.6.1.62 - transaminase, ec:4.2.1.59 - dehydratase, ec:2.3…
TR53458|c0_g2_i1	Phenylpropanoid biosynthesis	map00940	17	ec:3.2.1.126 - beta-glucosidase, ec:1.1.1.195 - dehydrogenase, ec:1.11.1.7 - lactoperoxidase, ec:2.1.1.146 - O-methyltransferase, ec:1.2.1.68 - dehydrogenase, ec:4.3.1.24 - ammonia-lyase, ec:2.1.1.104 - O-methyltransferase, ec:2.4.1.111 - glucosyltransferase, ec:2.4.1.128 - glucosyltransferase, ec:2.3.1.92 - O-sinapoyltransferase, ec:1.2.1.44 - reductase, ec:2.3.1.99 - O-hydroxycinnamoyltransfera…
TR68737|c0_g2_i5	Isoquinoline alkaloid biosynthesis, Phenylalanine metabolism, Tyrosine metabolism, Betalain biosynthesis, Tryptophan metabolism	map00950, map00360, map00350, map00965, map00380	17, 22, 26, 3, 29	ec:2.6.1.57 - transaminase, ec:2.1.1.128 - 6-O-methyltransferase, ec:2.6.1.5 - transaminase, ec:4.1.1.28 - decarboxylase, ec:1.1.1.247 - reductase (NADPH), ec:2.6.1.1 - transaminase, ec:2.1.1.116 - 4'-O-methyltransferase, ec:4.1.1.25 - decarboxylase, ec:1.4.3.2 - oxidase, ec:1.14.18.1 - monophenol monooxygenase, ec:1.21.3.3 - oxidase, ec:2.3.1.150 - 7-O-acetyltransferase, ec:1.1.1.248 - reductase…
scaffold12399	Geraniol degradation, Synthesis and degradation of ketone bodies, Valine, leucine and isoleucine degradation, Butanoate metabolism	map00281, map00072, map00280, map00650	4, 4, 21, 19	ec:2.3.1.16 - C-acyltransferase, ec:1.1.1.35 - dehydrogenase, ec:4.2.1.17 - hydratase, ec:4.1.3.4 - lyase, ec:1.1.1.30 - dehydrogenase, ec:2.3.3.10 - synthase, ec:2.3.1.9 - C-acetyltransferase, ec:4.1.3.4 - lyase, ec:1.2.1.3 - dehydrogenase (NAD+), ec:2.3.1.168 - (2-methylpropanoyl)transferase, ec:4.2.1.18 - hydratase, ec:2.3.1.16 - C-acyltransferase, ec:1.3.99.12 - dehydrogenase, ec:2.6.1.42 - t…
Mj_1_GCCAAT_L005_R1_001_(paired)_trimmed_(paired)_contig_5591	Purine metabolism	map00230	60	ec:3.6.1.15 - phosphatase, ec:4.6.1.2 - cyclase, ec:3.2.2.7 - nucleosidase, ec:3.6.1.9 - diphosphatase, ec:1.17.4.1 - reductase, ec:2.7.4.10 - kinase, ec:6.3.3.1 - cyclo-ligase, ec:1.7.3.3 - urate hydroxylase, ec:3.1.3.5 - uridine 5'-nucleotidase, ec:2.7.1.74 - kinase, ec:6.3.2.6 - synthase, ec:3.5.3.9 - deiminase, ec:3.2.2.1 - nucleosidase, ec:1.17.3.2 - oxidase, ec:2.7.4.3 - kinase, ec:3.5.2.17…
Mj_1_GCCAAT_L005_R1_001_(paired)_trimmed_(paired)_contig_4261	Amino sugar and nucleotide sugar metabolism	map00520	46	ec:5.1.3.2 - 4-epimerase, ec:2.4.2.24 - synthase, ec:2.7.7.9 - uridylyltransferase, ec:2.7.1.7 - mannokinase (phosphorylating), ec:5.4.2.8 - mannose phosphomutase, ec:2.7.1.44 - galacturonokinase (phosphorylating) D-galacturonic acid kinase, ec:2.7.7.22 - guanylyltransferase (GDP), ec:5.1.3.6 - 4-epimerase, ec:3.2.1.14 - ChiC, ec:2.7.7.13 - guanylyltransferase, ec:5.1.3.12 - 5'-epimerase, ec:2.7.…
scaffold12392	Anthocyanin biosynthesis	map00942	4	ec:2.4.1.238 - 3,5-di-O-glucoside 3'-O-glucosyltransferase, ec:2.3.1.153 - 5-(6'''-hydroxycinnamoyltransferase), ec:2.4.1.115 - 3-O-glucosyltransferase, ec:2.3.1.171 - 6''-O-malonyltransferase
scaffold12391	Pentose and glucuronate interconversions	map00040	20	ec:2.7.1.17 - xylulokinase (phosphorylating), ec:5.1.3.1 - 3-epimerase, ec:5.3.1.5 - isomerase, ec:2.7.7.9 - uridylyltransferase, ec:1.1.1.21 - reductase, ec:3.2.1.31 - beta-glucuronide glucuronohydrolase glucuronidase, ec:1.1.1.12 - 4-dehydrogenase, ec:2.7.7.44 - uridylyltransferase, ec:1.1.1.22 - 6-dehydrogenase, ec:1.1.1.9 - reductase, ec:3.1.1.11 - pectin demethoxylase, ec:3.2.1.15 - pectin d…
TR65448|c1_g2_i4	Fatty acid biosynthesis, Biotin metabolism	map00061, map00780	12, 9	ec:6.2.1.3 - ligase, ec:2.3.1.85 - synthase system, ec:6.4.1.2 - carboxylase, ec:3.1.2.14 - hydrolase, ec:4.2.1.59 - dehydratase, ec:2.3.1.86 - synthase system, ec:2.3.1.180 - synthase III, ec:2.3.1.39 - S-malonyltransferase, ec:2.3.1.41 - synthase I, ec:1.1.1.100 - reductase, ec:1.14.19.2 - 9-desaturase, ec:1.3.1.9 - reductase (NADH), ec:2.6.1.62 - transaminase, ec:4.2.1.59 - dehydratase, ec:2.3…
TR65448|c1_g2_i3	Fatty acid biosynthesis, Biotin metabolism	map00061, map00780	12, 9	ec:6.2.1.3 - ligase, ec:2.3.1.85 - synthase system, ec:6.4.1.2 - carboxylase, ec:3.1.2.14 - hydrolase, ec:4.2.1.59 - dehydratase, ec:2.3.1.86 - synthase system, ec:2.3.1.180 - synthase III, ec:2.3.1.39 - S-malonyltransferase, ec:2.3.1.41 - synthase I, ec:1.1.1.100 - reductase, ec:1.14.19.2 - 9-desaturase, ec:1.3.1.9 - reductase (NADH), ec:2.6.1.62 - transaminase, ec:4.2.1.59 - dehydratase, ec:2.3…
TR65448|c1_g2_i2	Fatty acid biosynthesis, Biotin metabolism	map00061, map00780	12, 9	ec:6.2.1.3 - ligase, ec:2.3.1.85 - synthase system, ec:6.4.1.2 - carboxylase, ec:3.1.2.14 - hydrolase, ec:4.2.1.59 - dehydratase, ec:2.3.1.86 - synthase system, ec:2.3.1.180 - synthase III, ec:2.3.1.39 - S-malonyltransferase, ec:2.3.1.41 - synthase I, ec:1.1.1.100 - reductase, ec:1.14.19.2 - 9-desaturase, ec:1.3.1.9 - reductase (NADH), ec:2.6.1.62 - transaminase, ec:4.2.1.59 - dehydratase, ec:2.3…
TR65448|c1_g2_i1	Fatty acid biosynthesis, Biotin metabolism	map00061, map00780	12, 9	ec:6.2.1.3 - ligase, ec:2.3.1.85 - synthase system, ec:6.4.1.2 - carboxylase, ec:3.1.2.14 - hydrolase, ec:4.2.1.59 - dehydratase, ec:2.3.1.86 - synthase system, ec:2.3.1.180 - synthase III, ec:2.3.1.39 - S-malonyltransferase, ec:2.3.1.41 - synthase I, ec:1.1.1.100 - reductase, ec:1.14.19.2 - 9-desaturase, ec:1.3.1.9 - reductase (NADH), ec:2.6.1.62 - transaminase, ec:4.2.1.59 - dehydratase, ec:2.3…
TR59391|c0_g2_i1	Sphingolipid metabolism	map00600	14	ec:3.2.1.23 - lactase (ambiguous), ec:3.2.1.22 - melibiase, ec:3.1.4.41 - phosphodiesterase D, ec:1.1.1.102 - reductase, ec:2.7.1.138 - kinase, ec:3.2.1.45 - psychosine hydrolase, ec:3.1.4.12 - phosphodiesterase, ec:2.3.1.50 - C-palmitoyltransferase, ec:3.5.1.23 - acylsphingosine deacylase, ec:2.7.1.91 - kinase, ec:2.3.1.24 - N-acyltransferase, ec:3.1.3.4 - phosphatase, ec:4.1.2.27 - aldolase, ec…
TR78913|c0_g1_i2	T cell receptor signaling pathway	map04660	2	ec:2.7.10.2 - protein-tyrosine kinase, ec:3.1.3.16 - phosphatase
TR75135|c0_g1_i1	Starch and sucrose metabolism	map00500	35	ec:3.2.1.4 - endo-1,4-beta-D-glucanase, ec:3.2.1.26 - invertase, ec:3.6.1.9 - diphosphatase, ec:2.7.7.9 - uridylyltransferase, ec:2.4.1.15 - synthase (UDP-forming), ec:3.2.1.1 - glycogenase, ec:3.2.1.39 - endo-1,3-beta-D-glucosidase, ec:2.4.1.21 - synthase (glycosyl-transferring), ec:2.4.1.12 - synthase (UDP-forming), ec:2.7.1.4 - fructokinase (phosphorylating), ec:5.3.1.9 - isomerase, ec:2.4.1.3…
TR75135|c0_g1_i2	Starch and sucrose metabolism	map00500	35	ec:3.2.1.4 - endo-1,4-beta-D-glucanase, ec:3.2.1.26 - invertase, ec:3.6.1.9 - diphosphatase, ec:2.7.7.9 - uridylyltransferase, ec:2.4.1.15 - synthase (UDP-forming), ec:3.2.1.1 - glycogenase, ec:3.2.1.39 - endo-1,3-beta-D-glucosidase, ec:2.4.1.21 - synthase (glycosyl-transferring), ec:2.4.1.12 - synthase (UDP-forming), ec:2.7.1.4 - fructokinase (phosphorylating), ec:5.3.1.9 - isomerase, ec:2.4.1.3…
TR53986|c0_g1_i1	Sphingolipid metabolism	map00600	14	ec:3.2.1.23 - lactase (ambiguous), ec:3.2.1.22 - melibiase, ec:3.1.4.41 - phosphodiesterase D, ec:1.1.1.102 - reductase, ec:2.7.1.138 - kinase, ec:3.2.1.45 - psychosine hydrolase, ec:3.1.4.12 - phosphodiesterase, ec:2.3.1.50 - C-palmitoyltransferase, ec:3.5.1.23 - acylsphingosine deacylase, ec:2.7.1.91 - kinase, ec:2.3.1.24 - N-acyltransferase, ec:3.1.3.4 - phosphatase, ec:4.1.2.27 - aldolase, ec…
TR71905|c1_g6_i1	Cysteine and methionine metabolism	map00270	45	ec:1.13.11.53 - dioxygenase (Ni2+-requiring), ec:1.2.1.11 - dehydrogenase, ec:1.13.11.20 - dioxygenase, ec:4.4.1.14 - synthase, ec:2.6.1.57 - transaminase, ec:1.1.1.37 - dehydrogenase, ec:1.14.17.4 - oxidase, ec:2.6.1.5 - transaminase, ec:4.1.1.50 - decarboxylase, ec:2.1.1.13 - synthase, ec:2.5.1.49 - aminocarboxypropyltransferase, ec:2.3.1.30 - O-acetyltransferase, ec:2.1.1.5 - S-methyltransfera…
TR53986|c0_g1_i5	Sphingolipid metabolism	map00600	14	ec:3.2.1.23 - lactase (ambiguous), ec:3.2.1.22 - melibiase, ec:3.1.4.41 - phosphodiesterase D, ec:1.1.1.102 - reductase, ec:2.7.1.138 - kinase, ec:3.2.1.45 - psychosine hydrolase, ec:3.1.4.12 - phosphodiesterase, ec:2.3.1.50 - C-palmitoyltransferase, ec:3.5.1.23 - acylsphingosine deacylase, ec:2.7.1.91 - kinase, ec:2.3.1.24 - N-acyltransferase, ec:3.1.3.4 - phosphatase, ec:4.1.2.27 - aldolase, ec…
scaffold11058	Purine metabolism, Sulfur metabolism, Monobactam biosynthesis, Selenocompound metabolism	map00230, map00920, map00261, map00450	60, 16, 5, 10	ec:3.6.1.15 - phosphatase, ec:4.6.1.2 - cyclase, ec:3.2.2.7 - nucleosidase, ec:3.6.1.9 - diphosphatase, ec:1.17.4.1 - reductase, ec:2.7.4.10 - kinase, ec:6.3.3.1 - cyclo-ligase, ec:1.7.3.3 - urate hydroxylase, ec:3.1.3.5 - uridine 5'-nucleotidase, ec:2.7.1.74 - kinase, ec:6.3.2.6 - synthase, ec:3.5.3.9 - deiminase, ec:3.2.2.1 - nucleosidase, ec:1.17.3.2 - oxidase, ec:2.7.4.3 - kinase, ec:3.5.2.17…
TR74941|c0_g1_i1	Arginine biosynthesis	map00220	21	ec:3.5.1.16 - deacetylase, ec:6.3.4.5 - synthase, ec:1.4.1.2 - dehydrogenase, ec:6.3.1.2 - synthetase, ec:2.7.2.8 - kinase, ec:6.3.4.16 - synthase (ammonia), ec:2.6.1.1 - transaminase, ec:4.3.2.1 - lyase, ec:2.6.1.11 - transaminase, ec:2.3.1.35 - N-acetyltransferase, ec:1.4.1.3 - dehydrogenase [NAD(P)+], ec:2.3.1.1 - N-acetyltransferase, ec:3.5.1.14 - acid amidohydrolase, ec:2.6.1.2 - transaminas…
scaffold11057	Purine metabolism, Sulfur metabolism, Monobactam biosynthesis, Selenocompound metabolism	map00230, map00920, map00261, map00450	60, 16, 5, 10	ec:3.6.1.15 - phosphatase, ec:4.6.1.2 - cyclase, ec:3.2.2.7 - nucleosidase, ec:3.6.1.9 - diphosphatase, ec:1.17.4.1 - reductase, ec:2.7.4.10 - kinase, ec:6.3.3.1 - cyclo-ligase, ec:1.7.3.3 - urate hydroxylase, ec:3.1.3.5 - uridine 5'-nucleotidase, ec:2.7.1.74 - kinase, ec:6.3.2.6 - synthase, ec:3.5.3.9 - deiminase, ec:3.2.2.1 - nucleosidase, ec:1.17.3.2 - oxidase, ec:2.7.4.3 - kinase, ec:3.5.2.17…
Mj_1_GCCAAT_L005_R1_001_(paired)_trimmed_(paired)_contig_105181	mTOR signaling pathway	map04150	2	ec:2.7.11.11 - protein kinase, ec:2.7.11.24 - protein kinase
TR77164|c0_g2_i2	Starch and sucrose metabolism	map00500	35	ec:3.2.1.4 - endo-1,4-beta-D-glucanase, ec:3.2.1.26 - invertase, ec:3.6.1.9 - diphosphatase, ec:2.7.7.9 - uridylyltransferase, ec:2.4.1.15 - synthase (UDP-forming), ec:3.2.1.1 - glycogenase, ec:3.2.1.39 - endo-1,3-beta-D-glucosidase, ec:2.4.1.21 - synthase (glycosyl-transferring), ec:2.4.1.12 - synthase (UDP-forming), ec:2.7.1.4 - fructokinase (phosphorylating), ec:5.3.1.9 - isomerase, ec:2.4.1.3…
Mj_1_GCCAAT_L005_R1_001_(paired)_trimmed_(paired)_contig_105182	Alanine, aspartate and glutamate metabolism, Histidine metabolism, Isoquinoline alkaloid biosynthesis, Tyrosine metabolism, Cysteine and methionine metabolism, Lysine biosynthesis, Arginine and proline metabolism, Phenylalanine, tyrosine and tryptophan biosynthesis, Carbon fixation in photosynthetic organisms, Arginine biosynthesis, Phenylalanine metabolism, Tropane, piperidine and pyridine alkal…	map00250, map00340, map00950, map00350, map00270, map00300, map00330, map00400, map00710, map00220, map00360, map00960, map00130, map00401	29, 13, 17, 26, 45, 12, 28, 27, 22, 21, 22, 11, 14, 5	ec:1.4.1.14 - synthase (NADH), ec:4.1.1.15 - decarboxylase, ec:6.3.4.5 - synthase, ec:1.4.1.2 - dehydrogenase, ec:1.2.1.24 - dehydrogenase (NAD+), ec:6.3.1.2 - synthetase, ec:3.5.1.3 - alpha-keto acid-omega-amidase, ec:1.2.1.16 - dehydrogenase [NAD(P)+], ec:6.3.4.16 - synthase (ammonia), ec:6.3.5.5 - synthase (glutamine-hydrolysing), ec:2.6.1.1 - transaminase, ec:4.3.2.1 - lyase, ec:1.4.3.2 - oxi…
TR77164|c0_g2_i3	Starch and sucrose metabolism	map00500	35	ec:3.2.1.4 - endo-1,4-beta-D-glucanase, ec:3.2.1.26 - invertase, ec:3.6.1.9 - diphosphatase, ec:2.7.7.9 - uridylyltransferase, ec:2.4.1.15 - synthase (UDP-forming), ec:3.2.1.1 - glycogenase, ec:3.2.1.39 - endo-1,3-beta-D-glucosidase, ec:2.4.1.21 - synthase (glycosyl-transferring), ec:2.4.1.12 - synthase (UDP-forming), ec:2.7.1.4 - fructokinase (phosphorylating), ec:5.3.1.9 - isomerase, ec:2.4.1.3…
TR77694|c1_g1_i1	alpha-Linolenic acid metabolism	map00592	11	ec:4.2.1.92 - dehydratase, ec:1.3.3.6 - oxidase, ec:2.3.1.16 - C-acyltransferase, ec:3.1.1.32 - A1, ec:1.3.1.42 - reductase, ec:1.1.1.1 - dehydrogenase, ec:1.13.11.12 - 13S-lipoxygenase, ec:5.3.99.6 - cyclase, ec:4.2.1.17 - hydratase, ec:2.1.1.141 - O-methyltransferase, ec:3.1.1.4 - A2
TR51953|c0_g1_i1	Ascorbate and aldarate metabolism, Pentose and glucuronate interconversions	map00053, map00040	18, 20	ec:1.11.1.11 - peroxidase, ec:1.2.1.3 - dehydrogenase (NAD+), ec:4.1.2.20 - aldolase, ec:1.8.5.1 - dehydrogenase (ascorbate), ec:1.1.1.122 - 1-dehydrogenase, ec:1.10.3.3 - oxidase, ec:2.7.7.44 - uridylyltransferase, ec:1.1.3.8 - oxidase, ec:1.1.1.22 - 6-dehydrogenase, ec:1.3.2.3 - dehydrogenase, ec:1.6.5.4 - reductase (NADH), ec:1.13.99.1 - oxygenase, ec:5.1.3.18 - 3,5-epimerase, ec:2.4.1.17 - 1-…
TR37717|c0_g1_i1	Drug metabolism - other enzymes, Metabolism of xenobiotics by cytochrome P450, Glutathione metabolism, Drug metabolism - cytochrome P450, Phenylpropanoid biosynthesis	map00983, map00980, map00480, map00982, map00940	19, 8, 19, 7, 17	ec:2.7.1.48 - kinase, ec:3.5.2.2 - hydantoinase, ec:3.1.1.1 - ali-esterase, ec:1.17.4.1 - reductase, ec:1.3.1.2 - dehydrogenase (NADP+), ec:3.5.1.6 - N-carbamoyl-beta-alanine amidohydrolase, ec:3.2.1.31 - beta-glucuronide glucuronohydrolase glucuronidase, ec:3.5.4.5 - deaminase, ec:1.17.3.2 - oxidase, ec:2.7.4.14 - kinase, ec:1.1.1.205 - dehydrogenase, ec:2.4.2.10 - phosphoribosyltransferase, ec:…
C804450	Steroid biosynthesis	map00100	10	ec:1.1.1.170 - 3-dehydrogenase (decarboxylating), ec:5.4.99.8 - synthase, ec:5.3.3.5 - Delta-isomerase, ec:1.3.1.72 - reductase, ec:2.5.1.21 - synthase, ec:2.1.1.143 - C-methyltransferase, ec:1.3.1.21 - reductase, ec:2.1.1.41 - 24-C-methyltransferase, ec:5.5.1.9 - cycloisomerase, ec:1.3.1.70 - reductase
Mj_1_GCCAAT_L005_R1_001_(paired)_trimmed_(paired)_contig_4292	Starch and sucrose metabolism	map00500	35	ec:3.2.1.4 - endo-1,4-beta-D-glucanase, ec:3.2.1.26 - invertase, ec:3.6.1.9 - diphosphatase, ec:2.7.7.9 - uridylyltransferase, ec:2.4.1.15 - synthase (UDP-forming), ec:3.2.1.1 - glycogenase, ec:3.2.1.39 - endo-1,3-beta-D-glucosidase, ec:2.4.1.21 - synthase (glycosyl-transferring), ec:2.4.1.12 - synthase (UDP-forming), ec:2.7.1.4 - fructokinase (phosphorylating), ec:5.3.1.9 - isomerase, ec:2.4.1.3…
TR51953|c0_g1_i2	Ascorbate and aldarate metabolism	map00053	18	ec:1.11.1.11 - peroxidase, ec:1.2.1.3 - dehydrogenase (NAD+), ec:4.1.2.20 - aldolase, ec:1.8.5.1 - dehydrogenase (ascorbate), ec:1.1.1.122 - 1-dehydrogenase, ec:1.10.3.3 - oxidase, ec:2.7.7.44 - uridylyltransferase, ec:1.1.3.8 - oxidase, ec:1.1.1.22 - 6-dehydrogenase, ec:1.3.2.3 - dehydrogenase, ec:1.6.5.4 - reductase (NADH), ec:1.13.99.1 - oxygenase, ec:5.1.3.18 - 3,5-epimerase, ec:2.4.1.17 - 1-…
TR68234|c0_g1_i2	Starch and sucrose metabolism	map00500	35	ec:3.2.1.4 - endo-1,4-beta-D-glucanase, ec:3.2.1.26 - invertase, ec:3.6.1.9 - diphosphatase, ec:2.7.7.9 - uridylyltransferase, ec:2.4.1.15 - synthase (UDP-forming), ec:3.2.1.1 - glycogenase, ec:3.2.1.39 - endo-1,3-beta-D-glucosidase, ec:2.4.1.21 - synthase (glycosyl-transferring), ec:2.4.1.12 - synthase (UDP-forming), ec:2.7.1.4 - fructokinase (phosphorylating), ec:5.3.1.9 - isomerase, ec:2.4.1.3…
TR1904|c0_g1_i1	Carbon fixation in photosynthetic organisms, Pyruvate metabolism, Glycolysis / Gluconeogenesis, Citrate cycle (TCA cycle)	map00710, map00620, map00010, map00020	22, 33, 28, 18	ec:5.1.3.1 - 3-epimerase, ec:4.1.1.49 - carboxykinase (ATP), ec:2.7.2.3 - kinase, ec:1.1.1.37 - dehydrogenase, ec:5.3.1.1 - isomerase, ec:2.7.9.1 - phosphate dikinase, ec:2.6.1.1 - transaminase, ec:1.2.1.12 - dehydrogenase (phosphorylating), ec:3.1.3.11 - hexose diphosphatase, ec:5.3.1.6 - isomerase, ec:2.2.1.1 - glycolaldehydetransferase, ec:4.1.2.13 - aldolase, ec:1.1.1.82 - dehydrogenase (NADP…
TR64802|c0_g1_i5	Ubiquinone and other terpenoid-quinone biosynthesis	map00130	14	ec:2.5.1.39 - polyprenyltransferase, ec:1.1.1.237 - reductase, ec:1.6.5.2 - dehydrogenase (quinone), ec:2.1.1.64 - 3-O-methyltransferase, ec:2.1.1.95 - C-methyltransferase, ec:4.1.3.36 - synthase, ec:1.13.11.27 - dioxygenase, ec:2.6.1.5 - transaminase, ec:4.2.99.20 - synthase, ec:6.2.1.26 - ligase, ec:2.2.1.9 - synthase, ec:2.1.1.114 - methyltransferase, ec:5.4.4.2 - synthase, ec:6.2.1.12 - ligase
TR64802|c0_g1_i4	Ubiquinone and other terpenoid-quinone biosynthesis	map00130	14	ec:2.5.1.39 - polyprenyltransferase, ec:1.1.1.237 - reductase, ec:1.6.5.2 - dehydrogenase (quinone), ec:2.1.1.64 - 3-O-methyltransferase, ec:2.1.1.95 - C-methyltransferase, ec:4.1.3.36 - synthase, ec:1.13.11.27 - dioxygenase, ec:2.6.1.5 - transaminase, ec:4.2.99.20 - synthase, ec:6.2.1.26 - ligase, ec:2.2.1.9 - synthase, ec:2.1.1.114 - methyltransferase, ec:5.4.4.2 - synthase, ec:6.2.1.12 - ligase
TR56209|c0_g1_i2	Steroid hormone biosynthesis, Steroid biosynthesis, Steroid degradation	map00140, map00100, map00984	12, 10, 3	ec:1.1.1.51 - 17)beta-hydroxysteroid dehydrogenase, ec:1.14.14.1 - monooxygenase, ec:1.3.1.3 - 5beta-reductase, ec:2.1.1.6 - O-methyltransferase, ec:1.1.1.145 - dehydrogenase, ec:1.1.1.62 - 17-dehydrogenase, ec:2.4.1.17 - 1-naphthol glucuronyltransferase, ec:1.1.1.53 - 20beta)-hydroxysteroid dehydrogenase, ec:1.1.1.149 - dehydrogenase, ec:1.3.1.22 - 4-dehydrogenase (NADP+), ec:1.1.1.146 - dehydro…
TR61511|c0_g1_i1	Thiamine metabolism	map00730	12	ec:3.6.1.15 - phosphatase, ec:2.7.4.7 - kinase, ec:2.8.1.7 - desulfurase, ec:2.7.6.2 - diphosphokinase, ec:2.7.1.50 - kinase, ec:2.7.4.3 - kinase, ec:2.7.1.49 - kinase, ec:3.5.99.2 - aminohydrolase, ec:2.5.1.3 - phosphate synthase, ec:3.1.3.2 - phosphatase, ec:4.1.99.19 - synthase, ec:2.2.1.7 - synthase
TR64802|c0_g1_i7	Ubiquinone and other terpenoid-quinone biosynthesis	map00130	14	ec:2.5.1.39 - polyprenyltransferase, ec:1.1.1.237 - reductase, ec:1.6.5.2 - dehydrogenase (quinone), ec:2.1.1.64 - 3-O-methyltransferase, ec:2.1.1.95 - C-methyltransferase, ec:4.1.3.36 - synthase, ec:1.13.11.27 - dioxygenase, ec:2.6.1.5 - transaminase, ec:4.2.99.20 - synthase, ec:6.2.1.26 - ligase, ec:2.2.1.9 - synthase, ec:2.1.1.114 - methyltransferase, ec:5.4.4.2 - synthase, ec:6.2.1.12 - ligase
Mj_1_GCCAAT_L005_R1_001_(paired)_trimmed_(paired)_contig_105163	Cysteine and methionine metabolism, Glutathione metabolism	map00270, map00480	45, 19	ec:1.13.11.53 - dioxygenase (Ni2+-requiring), ec:1.2.1.11 - dehydrogenase, ec:1.13.11.20 - dioxygenase, ec:4.4.1.14 - synthase, ec:2.6.1.57 - transaminase, ec:1.1.1.37 - dehydrogenase, ec:1.14.17.4 - oxidase, ec:2.6.1.5 - transaminase, ec:4.1.1.50 - decarboxylase, ec:2.1.1.13 - synthase, ec:2.5.1.49 - aminocarboxypropyltransferase, ec:2.3.1.30 - O-acetyltransferase, ec:2.1.1.5 - S-methyltransfera…
TR90828|c0_g1_i1	Pentose and glucuronate interconversions	map00040	20	ec:2.7.1.17 - xylulokinase (phosphorylating), ec:5.1.3.1 - 3-epimerase, ec:5.3.1.5 - isomerase, ec:2.7.7.9 - uridylyltransferase, ec:1.1.1.21 - reductase, ec:3.2.1.31 - beta-glucuronide glucuronohydrolase glucuronidase, ec:1.1.1.12 - 4-dehydrogenase, ec:2.7.7.44 - uridylyltransferase, ec:1.1.1.22 - 6-dehydrogenase, ec:1.1.1.9 - reductase, ec:3.1.1.11 - pectin demethoxylase, ec:3.2.1.15 - pectin d…
Mj_1_GCCAAT_L005_R1_001_(paired)_trimmed_(paired)_contig_106496	Oxidative phosphorylation	map00190	3	ec:3.6.1.1 - diphosphatase, ec:1.3.5.1 - dehydrogenase, ec:1.6.99.3 - dehydrogenase
TR64802|c0_g1_i3	Terpenoid backbone biosynthesis	map00900	27	ec:2.7.4.2 - kinase, ec:2.5.1.84 - diphosphate synthase [geranyl-diphosphate specific], ec:4.2.3.27 - synthase, ec:1.8.3.5 - oxidase, ec:2.5.1.58 - farnesyltransferase, ec:2.7.1.36 - kinase, ec:1.1.1.34 - reductase (NADPH), ec:2.1.1.100 - O-methyltransferase, ec:4.1.1.33 - decarboxylase, ec:2.5.1.30 - diphosphate synthase, ec:2.5.1.85 - diphosphate synthase [geranylgeranyl-diphosphate specific], …
C913615	Phosphatidylinositol signaling system, Glycerophospholipid metabolism	map04070, map00564	20, 33	ec:2.7.1.127 - 3-kinase, ec:2.7.1.158 - 2-kinase, ec:3.1.3.56 - 5-phosphatase, ec:2.7.1.107 - kinase (ATP), ec:2.7.1.137 - 3-kinase, ec:2.7.1.151 - multikinase, ec:3.1.4.11 - phospholipase C, ec:2.7.1.159 - 5/6-kinase, ec:3.1.3.36 - 5-phosphatase, ec:2.7.11.13 - kinase C, ec:3.1.3.57 - 1-phosphatase, ec:2.7.1.67 - 4-kinase, ec:2.7.8.11 - 3-phosphatidyltransferase, ec:2.7.7.41 - cytidylyltransfera…
scaffold12376	Steroid hormone biosynthesis, Steroid degradation, Flavonoid biosynthesis	map00140, map00984, map00941	12, 3, 10	ec:1.1.1.51 - 17)beta-hydroxysteroid dehydrogenase, ec:1.14.14.1 - monooxygenase, ec:1.3.1.3 - 5beta-reductase, ec:2.1.1.6 - O-methyltransferase, ec:1.1.1.145 - dehydrogenase, ec:1.1.1.62 - 17-dehydrogenase, ec:2.4.1.17 - 1-naphthol glucuronyltransferase, ec:1.1.1.53 - 20beta)-hydroxysteroid dehydrogenase, ec:1.1.1.149 - dehydrogenase, ec:1.3.1.22 - 4-dehydrogenase (NADP+), ec:1.1.1.146 - dehydro…
scaffold11045	Drug metabolism - other enzymes, Purine metabolism, Pyrimidine metabolism	map00983, map00230, map00240	19, 60, 31	ec:2.7.1.48 - kinase, ec:3.5.2.2 - hydantoinase, ec:3.1.1.1 - ali-esterase, ec:1.17.4.1 - reductase, ec:1.3.1.2 - dehydrogenase (NADP+), ec:3.5.1.6 - N-carbamoyl-beta-alanine amidohydrolase, ec:3.2.1.31 - beta-glucuronide glucuronohydrolase glucuronidase, ec:3.5.4.5 - deaminase, ec:1.17.3.2 - oxidase, ec:2.7.4.14 - kinase, ec:1.1.1.205 - dehydrogenase, ec:2.4.2.10 - phosphoribosyltransferase, ec:…
TR64802|c0_g1_i9	Ubiquinone and other terpenoid-quinone biosynthesis	map00130	14	ec:2.5.1.39 - polyprenyltransferase, ec:1.1.1.237 - reductase, ec:1.6.5.2 - dehydrogenase (quinone), ec:2.1.1.64 - 3-O-methyltransferase, ec:2.1.1.95 - C-methyltransferase, ec:4.1.3.36 - synthase, ec:1.13.11.27 - dioxygenase, ec:2.6.1.5 - transaminase, ec:4.2.99.20 - synthase, ec:6.2.1.26 - ligase, ec:2.2.1.9 - synthase, ec:2.1.1.114 - methyltransferase, ec:5.4.4.2 - synthase, ec:6.2.1.12 - ligase
TR64802|c0_g1_i8	Terpenoid backbone biosynthesis, Ubiquinone and other terpenoid-quinone biosynthesis	map00900, map00130	27, 14	ec:2.7.4.2 - kinase, ec:2.5.1.84 - diphosphate synthase [geranyl-diphosphate specific], ec:4.2.3.27 - synthase, ec:1.8.3.5 - oxidase, ec:2.5.1.58 - farnesyltransferase, ec:2.7.1.36 - kinase, ec:1.1.1.34 - reductase (NADPH), ec:2.1.1.100 - O-methyltransferase, ec:4.1.1.33 - decarboxylase, ec:2.5.1.30 - diphosphate synthase, ec:2.5.1.85 - diphosphate synthase [geranylgeranyl-diphosphate specific], …
TR76397|c0_g1_i5	Fatty acid biosynthesis, Biotin metabolism, Phenylalanine, tyrosine and tryptophan biosynthesis	map00061, map00780, map00400	12, 9, 27	ec:6.2.1.3 - ligase, ec:2.3.1.85 - synthase system, ec:6.4.1.2 - carboxylase, ec:3.1.2.14 - hydrolase, ec:4.2.1.59 - dehydratase, ec:2.3.1.86 - synthase system, ec:2.3.1.180 - synthase III, ec:2.3.1.39 - S-malonyltransferase, ec:2.3.1.41 - synthase I, ec:1.1.1.100 - reductase, ec:1.14.19.2 - 9-desaturase, ec:1.3.1.9 - reductase (NADH), ec:2.6.1.62 - transaminase, ec:4.2.1.59 - dehydratase, ec:2.3…
C901641	Alanine, aspartate and glutamate metabolism, Arginine biosynthesis, Nitrogen metabolism	map00250, map00220, map00910	29, 21, 18	ec:1.4.1.14 - synthase (NADH), ec:4.1.1.15 - decarboxylase, ec:6.3.4.5 - synthase, ec:1.4.1.2 - dehydrogenase, ec:1.2.1.24 - dehydrogenase (NAD+), ec:6.3.1.2 - synthetase, ec:3.5.1.3 - alpha-keto acid-omega-amidase, ec:1.2.1.16 - dehydrogenase [NAD(P)+], ec:6.3.4.16 - synthase (ammonia), ec:6.3.5.5 - synthase (glutamine-hydrolysing), ec:2.6.1.1 - transaminase, ec:4.3.2.1 - lyase, ec:1.4.3.2 - oxi…
TR76397|c0_g1_i2	Fatty acid biosynthesis, Biotin metabolism, Phenylalanine, tyrosine and tryptophan biosynthesis	map00061, map00780, map00400	12, 9, 27	ec:6.2.1.3 - ligase, ec:2.3.1.85 - synthase system, ec:6.4.1.2 - carboxylase, ec:3.1.2.14 - hydrolase, ec:4.2.1.59 - dehydratase, ec:2.3.1.86 - synthase system, ec:2.3.1.180 - synthase III, ec:2.3.1.39 - S-malonyltransferase, ec:2.3.1.41 - synthase I, ec:1.1.1.100 - reductase, ec:1.14.19.2 - 9-desaturase, ec:1.3.1.9 - reductase (NADH), ec:2.6.1.62 - transaminase, ec:4.2.1.59 - dehydratase, ec:2.3…
TR76397|c0_g1_i3	Fatty acid biosynthesis, Biotin metabolism	map00061, map00780	12, 9	ec:6.2.1.3 - ligase, ec:2.3.1.85 - synthase system, ec:6.4.1.2 - carboxylase, ec:3.1.2.14 - hydrolase, ec:4.2.1.59 - dehydratase, ec:2.3.1.86 - synthase system, ec:2.3.1.180 - synthase III, ec:2.3.1.39 - S-malonyltransferase, ec:2.3.1.41 - synthase I, ec:1.1.1.100 - reductase, ec:1.14.19.2 - 9-desaturase, ec:1.3.1.9 - reductase (NADH), ec:2.6.1.62 - transaminase, ec:4.2.1.59 - dehydratase, ec:2.3…
TR71294|c2_g1_i6	alpha-Linolenic acid metabolism, Retinol metabolism, Chloroalkane and chloroalkene degradation, Glycine, serine and threonine metabolism, Fatty acid degradation, Tyrosine metabolism, Metabolism of xenobiotics by cytochrome P450, Tropane, piperidine and pyridine alkaloid biosynthesis, Naphthalene degradation, Drug metabolism - cytochrome P450, Glycolysis / Gluconeogenesis	map00592, map00830, map00625, map00260, map00071, map00350, map00980, map00960, map00626, map00982, map00010	11, 6, 5, 39, 14, 26, 8, 11, 2, 7, 28	ec:4.2.1.92 - dehydratase, ec:1.3.3.6 - oxidase, ec:2.3.1.16 - C-acyltransferase, ec:3.1.1.32 - A1, ec:1.3.1.42 - reductase, ec:1.1.1.1 - dehydrogenase, ec:1.13.11.12 - 13S-lipoxygenase, ec:5.3.99.6 - cyclase, ec:4.2.1.17 - hydratase, ec:2.1.1.141 - O-methyltransferase, ec:3.1.1.4 - A2, ec:1.2.1.36 - dehydrogenase, ec:1.14.14.1 - monooxygenase, ec:1.1.1.1 - dehydrogenase, ec:1.2.3.1 - oxidase, ec…
TR71294|c2_g1_i5	alpha-Linolenic acid metabolism, Retinol metabolism, Chloroalkane and chloroalkene degradation, Glycine, serine and threonine metabolism, Fatty acid degradation, Tyrosine metabolism, Metabolism of xenobiotics by cytochrome P450, Tropane, piperidine and pyridine alkaloid biosynthesis, Naphthalene degradation, Drug metabolism - cytochrome P450, Glycolysis / Gluconeogenesis	map00592, map00830, map00625, map00260, map00071, map00350, map00980, map00960, map00626, map00982, map00010	11, 6, 5, 39, 14, 26, 8, 11, 2, 7, 28	ec:4.2.1.92 - dehydratase, ec:1.3.3.6 - oxidase, ec:2.3.1.16 - C-acyltransferase, ec:3.1.1.32 - A1, ec:1.3.1.42 - reductase, ec:1.1.1.1 - dehydrogenase, ec:1.13.11.12 - 13S-lipoxygenase, ec:5.3.99.6 - cyclase, ec:4.2.1.17 - hydratase, ec:2.1.1.141 - O-methyltransferase, ec:3.1.1.4 - A2, ec:1.2.1.36 - dehydrogenase, ec:1.14.14.1 - monooxygenase, ec:1.1.1.1 - dehydrogenase, ec:1.2.3.1 - oxidase, ec…
TR74544|c0_g1_i6	Drug metabolism - cytochrome P450	map00982	7	ec:1.14.14.1 - monooxygenase, ec:1.1.1.1 - dehydrogenase, ec:1.2.1.5 - dehydrogenase [NAD(P)+], ec:1.2.3.1 - oxidase, ec:2.4.1.17 - 1-naphthol glucuronyltransferase, ec:1.14.13.8 - monooxygenase, ec:2.5.1.18 - transferase
TR74544|c0_g1_i4	Drug metabolism - cytochrome P450	map00982	7	ec:1.14.14.1 - monooxygenase, ec:1.1.1.1 - dehydrogenase, ec:1.2.1.5 - dehydrogenase [NAD(P)+], ec:1.2.3.1 - oxidase, ec:2.4.1.17 - 1-naphthol glucuronyltransferase, ec:1.14.13.8 - monooxygenase, ec:2.5.1.18 - transferase
TR84196|c0_g1_i1	Carbon fixation in photosynthetic organisms, Fructose and mannose metabolism, Glycolysis / Gluconeogenesis, Inositol phosphate metabolism	map00710, map00051, map00010, map00562	22, 27, 28, 25	ec:5.1.3.1 - 3-epimerase, ec:4.1.1.49 - carboxykinase (ATP), ec:2.7.2.3 - kinase, ec:1.1.1.37 - dehydrogenase, ec:5.3.1.1 - isomerase, ec:2.7.9.1 - phosphate dikinase, ec:2.6.1.1 - transaminase, ec:1.2.1.12 - dehydrogenase (phosphorylating), ec:3.1.3.11 - hexose diphosphatase, ec:5.3.1.6 - isomerase, ec:2.2.1.1 - glycolaldehydetransferase, ec:4.1.2.13 - aldolase, ec:1.1.1.82 - dehydrogenase (NADP…
TR73867|c2_g1_i8	Steroid biosynthesis	map00100	10	ec:1.1.1.170 - 3-dehydrogenase (decarboxylating), ec:5.4.99.8 - synthase, ec:5.3.3.5 - Delta-isomerase, ec:1.3.1.72 - reductase, ec:2.5.1.21 - synthase, ec:2.1.1.143 - C-methyltransferase, ec:1.3.1.21 - reductase, ec:2.1.1.41 - 24-C-methyltransferase, ec:5.5.1.9 - cycloisomerase, ec:1.3.1.70 - reductase
TR48934|c0_g1_i1	Nitrogen metabolism	map00910	18	ec:3.5.1.49 - ec:3.5.1.49 formamidase, ec:1.4.1.14 - synthase (NADH), ec:1.7.7.1 - reductase, ec:3.5.5.1 - acetonitrilase, ec:4.2.1.1 - anhydrase, ec:1.4.1.2 - dehydrogenase, ec:4.2.1.104 - cyanate lyase, ec:6.3.1.2 - synthetase, ec:6.3.4.16 - synthase (ammonia), ec:1.7.7.2 - reductase, ec:1.4.1.3 - dehydrogenase [NAD(P)+], ec:1.4.7.1 - synthase (ferredoxin), ec:1.13.12.16 - monooxygenase, ec:1.7…
scaffold13693	Amino sugar and nucleotide sugar metabolism	map00520	46	ec:5.1.3.2 - 4-epimerase, ec:2.4.2.24 - synthase, ec:2.7.7.9 - uridylyltransferase, ec:2.7.1.7 - mannokinase (phosphorylating), ec:5.4.2.8 - mannose phosphomutase, ec:2.7.1.44 - galacturonokinase (phosphorylating) D-galacturonic acid kinase, ec:2.7.7.22 - guanylyltransferase (GDP), ec:5.1.3.6 - 4-epimerase, ec:3.2.1.14 - ChiC, ec:2.7.7.13 - guanylyltransferase, ec:5.1.3.12 - 5'-epimerase, ec:2.7.…
TR75771|c0_g1_i10	Aminoacyl-tRNA biosynthesis, Pentose and glucuronate interconversions	map00970, map00040	23, 20	ec:6.1.1.22 - ligase, ec:6.1.1.3 - ligase, ec:6.1.1.10 - ligase, ec:6.1.1.18 - ligase, ec:6.1.1.7 - ligase, ec:6.1.1.23 - ligase, ec:6.1.1.14 - ligase, ec:6.1.1.4 - ligase, ec:6.1.1.20 - ligase, ec:6.1.1.11 - ligase, ec:6.1.1.1 - ligase, ec:6.1.1.19 - ligase, ec:2.1.2.9 - formyltransferase, ec:6.1.1.9 - ligase, ec:6.1.1.15 - ligase, ec:6.1.1.5 - ligase, ec:6.1.1.21 - ligase, ec:6.1.1.12 - ligase,…
TR71294|c2_g1_i4	Tropane, piperidine and pyridine alkaloid biosynthesis	map00960	11	ec:1.1.1.237 - reductase, ec:2.6.1.57 - transaminase, ec:1.14.11.11 - (6S)-dioxygenase, ec:2.6.1.5 - transaminase, ec:2.6.1.1 - transaminase, ec:2.6.1.9 - transaminase, ec:2.6.1.58 - transaminase, ec:2.1.1.53 - N-methyltransferase, ec:1.4.3.21 - oxidase, ec:1.1.1.206 - reductase I, ec:1.1.1.236 - reductase II
C827115	Purine metabolism	map00230	60	ec:3.6.1.15 - phosphatase, ec:4.6.1.2 - cyclase, ec:3.2.2.7 - nucleosidase, ec:3.6.1.9 - diphosphatase, ec:1.17.4.1 - reductase, ec:2.7.4.10 - kinase, ec:6.3.3.1 - cyclo-ligase, ec:1.7.3.3 - urate hydroxylase, ec:3.1.3.5 - uridine 5'-nucleotidase, ec:2.7.1.74 - kinase, ec:6.3.2.6 - synthase, ec:3.5.3.9 - deiminase, ec:3.2.2.1 - nucleosidase, ec:1.17.3.2 - oxidase, ec:2.7.4.3 - kinase, ec:3.5.2.17…
scaffold11038	T cell receptor signaling pathway	map04660	2	ec:2.7.10.2 - protein-tyrosine kinase, ec:3.1.3.16 - phosphatase
scaffold12368	Pentose and glucuronate interconversions	map00040	20	ec:2.7.1.17 - xylulokinase (phosphorylating), ec:5.1.3.1 - 3-epimerase, ec:5.3.1.5 - isomerase, ec:2.7.7.9 - uridylyltransferase, ec:1.1.1.21 - reductase, ec:3.2.1.31 - beta-glucuronide glucuronohydrolase glucuronidase, ec:1.1.1.12 - 4-dehydrogenase, ec:2.7.7.44 - uridylyltransferase, ec:1.1.1.22 - 6-dehydrogenase, ec:1.1.1.9 - reductase, ec:3.1.1.11 - pectin demethoxylase, ec:3.2.1.15 - pectin d…
scaffold11034	Pyruvate metabolism, Histidine metabolism, Chloroalkane and chloroalkene degradation, Ascorbate and aldarate metabolism, Lysine degradation, Fatty acid degradation, Nitrogen metabolism, Tyrosine metabolism, Metabolism of xenobiotics by cytochrome P450, Arginine and proline metabolism, Limonene and pinene degradation, Tryptophan metabolism, Glycerolipid metabolism, Phenylalanine metabolism, beta-A…	map00620, map00340, map00625, map00053, map00310, map00071, map00910, map00350, map00980, map00330, map00903, map00380, map00561, map00360, map00410, map00280, map00982, map00010, map00981	33, 13, 5, 18, 12, 14, 18, 26, 8, 28, 2, 29, 24, 22, 17, 21, 7, 28, 2	ec:4.1.1.32 - carboxykinase (GTP), ec:1.2.1.3 - dehydrogenase (NAD+), ec:1.1.1.79 - reductase (NADP+), ec:4.1.1.49 - carboxykinase (ATP), ec:2.3.1.12 - acetyltransferase, ec:1.1.2.3 - dehydrogenase (cytochrome), ec:1.1.1.37 - dehydrogenase, ec:1.1.1.28 - dehydrogenase, ec:3.1.2.1 - hydrolase, ec:2.7.9.1 - phosphate dikinase, ec:6.4.1.2 - carboxylase, ec:1.1.2.4 - dehydrogenase (cytochrome), ec:3.…
TR93976|c0_g1_i1	Carbon fixation in photosynthetic organisms, Pyruvate metabolism, Glycolysis / Gluconeogenesis, Citrate cycle (TCA cycle)	map00710, map00620, map00010, map00020	22, 33, 28, 18	ec:5.1.3.1 - 3-epimerase, ec:4.1.1.49 - carboxykinase (ATP), ec:2.7.2.3 - kinase, ec:1.1.1.37 - dehydrogenase, ec:5.3.1.1 - isomerase, ec:2.7.9.1 - phosphate dikinase, ec:2.6.1.1 - transaminase, ec:1.2.1.12 - dehydrogenase (phosphorylating), ec:3.1.3.11 - hexose diphosphatase, ec:5.3.1.6 - isomerase, ec:2.2.1.1 - glycolaldehydetransferase, ec:4.1.2.13 - aldolase, ec:1.1.1.82 - dehydrogenase (NADP…
scaffold12365	Starch and sucrose metabolism	map00500	35	ec:3.2.1.4 - endo-1,4-beta-D-glucanase, ec:3.2.1.26 - invertase, ec:3.6.1.9 - diphosphatase, ec:2.7.7.9 - uridylyltransferase, ec:2.4.1.15 - synthase (UDP-forming), ec:3.2.1.1 - glycogenase, ec:3.2.1.39 - endo-1,3-beta-D-glucosidase, ec:2.4.1.21 - synthase (glycosyl-transferring), ec:2.4.1.12 - synthase (UDP-forming), ec:2.7.1.4 - fructokinase (phosphorylating), ec:5.3.1.9 - isomerase, ec:2.4.1.3…
TR68901|c0_g1_i3	Nicotinate and nicotinamide metabolism	map00760	17	ec:2.7.7.1 - adenylyltransferase, ec:3.6.1.9 - diphosphatase, ec:2.7.1.23 - kinase, ec:3.1.3.5 - uridine 5'-nucleotidase, ec:1.2.1.24 - dehydrogenase (NAD+), ec:1.2.1.16 - dehydrogenase [NAD(P)+], ec:3.2.2.1 - nucleosidase, ec:2.4.2.19 - diphosphorylase (carboxylating), ec:1.6.1.1 - transhydrogenase (Si-specific), ec:6.3.5.1 - synthase (glutamine-hydrolysing), ec:2.7.7.18 - adenylyltransferase, e…
scaffold11032	Thiamine metabolism, Riboflavin metabolism	map00730, map00740	12, 12	ec:3.6.1.15 - phosphatase, ec:2.7.4.7 - kinase, ec:2.8.1.7 - desulfurase, ec:2.7.6.2 - diphosphokinase, ec:2.7.1.50 - kinase, ec:2.7.4.3 - kinase, ec:2.7.1.49 - kinase, ec:3.5.99.2 - aminohydrolase, ec:2.5.1.3 - phosphate synthase, ec:3.1.3.2 - phosphatase, ec:4.1.99.19 - synthase, ec:2.2.1.7 - synthase, ec:3.6.1.9 - diphosphatase, ec:3.5.4.25 - cyclohydrolase II, ec:2.7.7.2 - synthase, ec:1.5.1.…
TR68901|c0_g1_i2	Nicotinate and nicotinamide metabolism	map00760	17	ec:2.7.7.1 - adenylyltransferase, ec:3.6.1.9 - diphosphatase, ec:2.7.1.23 - kinase, ec:3.1.3.5 - uridine 5'-nucleotidase, ec:1.2.1.24 - dehydrogenase (NAD+), ec:1.2.1.16 - dehydrogenase [NAD(P)+], ec:3.2.2.1 - nucleosidase, ec:2.4.2.19 - diphosphorylase (carboxylating), ec:1.6.1.1 - transhydrogenase (Si-specific), ec:6.3.5.1 - synthase (glutamine-hydrolysing), ec:2.7.7.18 - adenylyltransferase, e…
TR73867|c2_g1_i5	Steroid biosynthesis	map00100	10	ec:1.1.1.170 - 3-dehydrogenase (decarboxylating), ec:5.4.99.8 - synthase, ec:5.3.3.5 - Delta-isomerase, ec:1.3.1.72 - reductase, ec:2.5.1.21 - synthase, ec:2.1.1.143 - C-methyltransferase, ec:1.3.1.21 - reductase, ec:2.1.1.41 - 24-C-methyltransferase, ec:5.5.1.9 - cycloisomerase, ec:1.3.1.70 - reductase
TR73867|c2_g1_i3	Steroid biosynthesis	map00100	10	ec:1.1.1.170 - 3-dehydrogenase (decarboxylating), ec:5.4.99.8 - synthase, ec:5.3.3.5 - Delta-isomerase, ec:1.3.1.72 - reductase, ec:2.5.1.21 - synthase, ec:2.1.1.143 - C-methyltransferase, ec:1.3.1.21 - reductase, ec:2.1.1.41 - 24-C-methyltransferase, ec:5.5.1.9 - cycloisomerase, ec:1.3.1.70 - reductase
TR74544|c0_g1_i3	Drug metabolism - cytochrome P450	map00982	7	ec:1.14.14.1 - monooxygenase, ec:1.1.1.1 - dehydrogenase, ec:1.2.1.5 - dehydrogenase [NAD(P)+], ec:1.2.3.1 - oxidase, ec:2.4.1.17 - 1-naphthol glucuronyltransferase, ec:1.14.13.8 - monooxygenase, ec:2.5.1.18 - transferase
TR74544|c0_g1_i2	Drug metabolism - cytochrome P450	map00982	7	ec:1.14.14.1 - monooxygenase, ec:1.1.1.1 - dehydrogenase, ec:1.2.1.5 - dehydrogenase [NAD(P)+], ec:1.2.3.1 - oxidase, ec:2.4.1.17 - 1-naphthol glucuronyltransferase, ec:1.14.13.8 - monooxygenase, ec:2.5.1.18 - transferase
TR74544|c0_g1_i1	Drug metabolism - cytochrome P450	map00982	7	ec:1.14.14.1 - monooxygenase, ec:1.1.1.1 - dehydrogenase, ec:1.2.1.5 - dehydrogenase [NAD(P)+], ec:1.2.3.1 - oxidase, ec:2.4.1.17 - 1-naphthol glucuronyltransferase, ec:1.14.13.8 - monooxygenase, ec:2.5.1.18 - transferase
TR68958|c0_g1_i7	Amino sugar and nucleotide sugar metabolism, Galactose metabolism	map00520, map00052	46, 20	ec:5.1.3.2 - 4-epimerase, ec:2.4.2.24 - synthase, ec:2.7.7.9 - uridylyltransferase, ec:2.7.1.7 - mannokinase (phosphorylating), ec:5.4.2.8 - mannose phosphomutase, ec:2.7.1.44 - galacturonokinase (phosphorylating) D-galacturonic acid kinase, ec:2.7.7.22 - guanylyltransferase (GDP), ec:5.1.3.6 - 4-epimerase, ec:3.2.1.14 - ChiC, ec:2.7.7.13 - guanylyltransferase, ec:5.1.3.12 - 5'-epimerase, ec:2.7.…
C890439	alpha-Linolenic acid metabolism, Retinol metabolism, Chloroalkane and chloroalkene degradation, Glycine, serine and threonine metabolism, Fatty acid degradation, Tyrosine metabolism, Metabolism of xenobiotics by cytochrome P450, Naphthalene degradation, Drug metabolism - cytochrome P450, Glycolysis / Gluconeogenesis	map00592, map00830, map00625, map00260, map00071, map00350, map00980, map00626, map00982, map00010	11, 6, 5, 39, 14, 26, 8, 2, 7, 28	ec:4.2.1.92 - dehydratase, ec:1.3.3.6 - oxidase, ec:2.3.1.16 - C-acyltransferase, ec:3.1.1.32 - A1, ec:1.3.1.42 - reductase, ec:1.1.1.1 - dehydrogenase, ec:1.13.11.12 - 13S-lipoxygenase, ec:5.3.99.6 - cyclase, ec:4.2.1.17 - hydratase, ec:2.1.1.141 - O-methyltransferase, ec:3.1.1.4 - A2, ec:1.2.1.36 - dehydrogenase, ec:1.14.14.1 - monooxygenase, ec:1.1.1.1 - dehydrogenase, ec:1.2.3.1 - oxidase, ec…
TR61298|c0_g1_i2	Flavonoid biosynthesis	map00941	10	ec:1.1.1.234 - 4-reductase, ec:1.17.1.3 - reductase, ec:2.3.1.170 - synthase, ec:2.1.1.104 - O-methyltransferase, ec:2.3.1.74 - synthase, ec:5.5.1.6 - isomerase, ec:1.3.1.77 - reductase [(2R,3R)-flavan-3-ol-forming], ec:1.1.1.219 - 4-reductase, ec:2.3.1.133 - O-hydroxycinnamoyltransferase, ec:1.14.11.9 - 3-dioxygenase
TR79608|c1_g3_i2	Phenylalanine metabolism, Styrene degradation, Arginine and proline metabolism, Aminobenzoate degradation, Tryptophan metabolism	map00360, map00643, map00330, map00627, map00380	22, 6, 28, 11, 29	ec:5.3.2.1 - tautomerase, ec:1.1.1.237 - reductase, ec:2.6.1.57 - transaminase, ec:1.13.11.27 - dioxygenase, ec:1.1.1.90 - dehydrogenase, ec:2.6.1.5 - transaminase, ec:4.1.1.28 - decarboxylase, ec:2.6.1.1 - transaminase, ec:2.6.1.9 - transaminase, ec:1.4.3.2 - oxidase, ec:2.6.1.58 - transaminase, ec:1.1.1.157 - dehydrogenase, ec:4.3.1.24 - ammonia-lyase, ec:3.5.1.4 - acylamidase, ec:2.6.1.21 - tr…
scaffold13682	alpha-Linolenic acid metabolism, Lysine degradation, Fatty acid degradation, Aminobenzoate degradation, Limonene and pinene degradation, Tryptophan metabolism, Caprolactam degradation, Geraniol degradation, Propanoate metabolism, Phenylalanine metabolism, Benzoate degradation, beta-Alanine metabolism, Valine, leucine and isoleucine degradation, Butanoate metabolism, Fatty acid elongation, Carbon …	map00592, map00310, map00071, map00627, map00903, map00380, map00930, map00281, map00640, map00360, map00362, map00410, map00280, map00650, map00062, map00720	11, 12, 14, 11, 2, 29, 8, 4, 21, 22, 10, 17, 21, 19, 7, 21	ec:4.2.1.92 - dehydratase, ec:1.3.3.6 - oxidase, ec:2.3.1.16 - C-acyltransferase, ec:3.1.1.32 - A1, ec:1.3.1.42 - reductase, ec:1.1.1.1 - dehydrogenase, ec:1.13.11.12 - 13S-lipoxygenase, ec:5.3.99.6 - cyclase, ec:4.2.1.17 - hydratase, ec:2.1.1.141 - O-methyltransferase, ec:3.1.1.4 - A2, ec:1.2.1.3 - dehydrogenase (NAD+), ec:1.5.1.10 - dehydrogenase (NADP+, L-glutamate-forming), ec:1.2.4.2 - dehyd…
TR29105|c0_g1_i1	Vitamin B6 metabolism	map00750	8	ec:1.4.3.5 - 5'-phosphate synthase, ec:4.2.3.1 - synthase, ec:1.1.1.65 - 4-dehydrogenase, ec:1.2.3.1 - oxidase, ec:1.1.1.107 - 4-dehydrogenase, ec:2.7.1.35 - kinase, ec:4.3.3.6 - 5'-phosphate synthase (glutamine hydrolysing), ec:2.6.1.52 - transaminase
TR52364|c0_g1_i1	Drug metabolism - other enzymes, Metabolism of xenobiotics by cytochrome P450, Glutathione metabolism, Drug metabolism - cytochrome P450	map00983, map00980, map00480, map00982	19, 8, 19, 7	ec:2.7.1.48 - kinase, ec:3.5.2.2 - hydantoinase, ec:3.1.1.1 - ali-esterase, ec:1.17.4.1 - reductase, ec:1.3.1.2 - dehydrogenase (NADP+), ec:3.5.1.6 - N-carbamoyl-beta-alanine amidohydrolase, ec:3.2.1.31 - beta-glucuronide glucuronohydrolase glucuronidase, ec:3.5.4.5 - deaminase, ec:1.17.3.2 - oxidase, ec:2.7.4.14 - kinase, ec:1.1.1.205 - dehydrogenase, ec:2.4.2.10 - phosphoribosyltransferase, ec:…
Mj_1_GCCAAT_L005_R1_001_(paired)_trimmed_(paired)_contig_105186	Alanine, aspartate and glutamate metabolism, Nitrogen metabolism	map00250, map00910	29, 18	ec:1.4.1.14 - synthase (NADH), ec:4.1.1.15 - decarboxylase, ec:6.3.4.5 - synthase, ec:1.4.1.2 - dehydrogenase, ec:1.2.1.24 - dehydrogenase (NAD+), ec:6.3.1.2 - synthetase, ec:3.5.1.3 - alpha-keto acid-omega-amidase, ec:1.2.1.16 - dehydrogenase [NAD(P)+], ec:6.3.4.16 - synthase (ammonia), ec:6.3.5.5 - synthase (glutamine-hydrolysing), ec:2.6.1.1 - transaminase, ec:4.3.2.1 - lyase, ec:1.4.3.2 - oxi…
scaffold11027	Nitrogen metabolism	map00910	18	ec:3.5.1.49 - ec:3.5.1.49 formamidase, ec:1.4.1.14 - synthase (NADH), ec:1.7.7.1 - reductase, ec:3.5.5.1 - acetonitrilase, ec:4.2.1.1 - anhydrase, ec:1.4.1.2 - dehydrogenase, ec:4.2.1.104 - cyanate lyase, ec:6.3.1.2 - synthetase, ec:6.3.4.16 - synthase (ammonia), ec:1.7.7.2 - reductase, ec:1.4.1.3 - dehydrogenase [NAD(P)+], ec:1.4.7.1 - synthase (ferredoxin), ec:1.13.12.16 - monooxygenase, ec:1.7…
TR60163|c0_g1_i6	Ascorbate and aldarate metabolism, Glutathione metabolism, Phenylalanine, tyrosine and tryptophan biosynthesis	map00053, map00480, map00400	18, 19, 27	ec:1.11.1.11 - peroxidase, ec:1.2.1.3 - dehydrogenase (NAD+), ec:4.1.2.20 - aldolase, ec:1.8.5.1 - dehydrogenase (ascorbate), ec:1.1.1.122 - 1-dehydrogenase, ec:1.10.3.3 - oxidase, ec:2.7.7.44 - uridylyltransferase, ec:1.1.3.8 - oxidase, ec:1.1.1.22 - 6-dehydrogenase, ec:1.3.2.3 - dehydrogenase, ec:1.6.5.4 - reductase (NADH), ec:1.13.99.1 - oxygenase, ec:5.1.3.18 - 3,5-epimerase, ec:2.4.1.17 - 1-…
TR56336|c0_g1_i1	Fatty acid biosynthesis	map00061	12	ec:6.2.1.3 - ligase, ec:2.3.1.85 - synthase system, ec:6.4.1.2 - carboxylase, ec:3.1.2.14 - hydrolase, ec:4.2.1.59 - dehydratase, ec:2.3.1.86 - synthase system, ec:2.3.1.180 - synthase III, ec:2.3.1.39 - S-malonyltransferase, ec:2.3.1.41 - synthase I, ec:1.1.1.100 - reductase, ec:1.14.19.2 - 9-desaturase, ec:1.3.1.9 - reductase (NADH)
TR55923|c1_g2_i2	Phenylpropanoid biosynthesis	map00940	17	ec:3.2.1.126 - beta-glucosidase, ec:1.1.1.195 - dehydrogenase, ec:1.11.1.7 - lactoperoxidase, ec:2.1.1.146 - O-methyltransferase, ec:1.2.1.68 - dehydrogenase, ec:4.3.1.24 - ammonia-lyase, ec:2.1.1.104 - O-methyltransferase, ec:2.4.1.111 - glucosyltransferase, ec:2.4.1.128 - glucosyltransferase, ec:2.3.1.92 - O-sinapoyltransferase, ec:1.2.1.44 - reductase, ec:2.3.1.99 - O-hydroxycinnamoyltransfera…
C804484	Glycine, serine and threonine metabolism, Glyoxylate and dicarboxylate metabolism, One carbon pool by folate, Cyanoamino acid metabolism, Methane metabolism	map00260, map00630, map00670, map00460, map00680	39, 34, 14, 13, 23	ec:2.3.1.37 - synthase, ec:2.7.1.31 - 3-kinase, ec:1.2.1.11 - dehydrogenase, ec:4.3.1.18 - ammonia-lyase, ec:4.1.2.5 - aldolase, ec:2.7.1.39 - kinase, ec:2.1.2.1 - hydroxymethyltransferase, ec:1.1.1.81 - reductase, ec:2.1.1.5 - S-methyltransferase, ec:2.6.1.45 - transaminase, ec:1.5.3.10 - oxidase, ec:2.1.2.10 - S-aminomethyldihydrolipoylprotein:(6S)-tetrahydrofolate aminomethyltransferase (ammon…
TR67270|c3_g1_i1	Arginine and proline metabolism	map00330	28	ec:1.2.1.3 - dehydrogenase (NAD+), ec:1.5.3.17 - polyamine oxidase, ec:1.2.1.41 - dehydrogenase, ec:3.5.3.12 - deiminase, ec:2.3.1.64 - N4-coumaroyltransferase, ec:2.7.3.3 - kinase, ec:1.14.11.2 - 4-dioxygenase, ec:4.1.1.50 - decarboxylase, ec:3.5.1.59 - amidase, ec:4.1.1.19 - decarboxylase, ec:2.6.1.1 - transaminase, ec:2.5.1.16 - synthase, ec:2.1.1.2 - N-methyltransferase, ec:1.5.1.19 - dehydro…
TR68958|c0_g1_i5	Amino sugar and nucleotide sugar metabolism, Galactose metabolism	map00520, map00052	46, 20	ec:5.1.3.2 - 4-epimerase, ec:2.4.2.24 - synthase, ec:2.7.7.9 - uridylyltransferase, ec:2.7.1.7 - mannokinase (phosphorylating), ec:5.4.2.8 - mannose phosphomutase, ec:2.7.1.44 - galacturonokinase (phosphorylating) D-galacturonic acid kinase, ec:2.7.7.22 - guanylyltransferase (GDP), ec:5.1.3.6 - 4-epimerase, ec:3.2.1.14 - ChiC, ec:2.7.7.13 - guanylyltransferase, ec:5.1.3.12 - 5'-epimerase, ec:2.7.…
TR73241|c2_g2_i10	Amino sugar and nucleotide sugar metabolism, Galactose metabolism, Fructose and mannose metabolism, Starch and sucrose metabolism, Neomycin, kanamycin and gentamicin biosynthesis, Streptomycin biosynthesis, Glycolysis / Gluconeogenesis	map00520, map00052, map00051, map00500, map00524, map00521, map00010	46, 20, 27, 35, 2, 10, 28	ec:5.1.3.2 - 4-epimerase, ec:2.4.2.24 - synthase, ec:2.7.7.9 - uridylyltransferase, ec:2.7.1.7 - mannokinase (phosphorylating), ec:5.4.2.8 - mannose phosphomutase, ec:2.7.1.44 - galacturonokinase (phosphorylating) D-galacturonic acid kinase, ec:2.7.7.22 - guanylyltransferase (GDP), ec:5.1.3.6 - 4-epimerase, ec:3.2.1.14 - ChiC, ec:2.7.7.13 - guanylyltransferase, ec:5.1.3.12 - 5'-epimerase, ec:2.7.…
TR68958|c0_g1_i4	Amino sugar and nucleotide sugar metabolism, Galactose metabolism	map00520, map00052	46, 20	ec:5.1.3.2 - 4-epimerase, ec:2.4.2.24 - synthase, ec:2.7.7.9 - uridylyltransferase, ec:2.7.1.7 - mannokinase (phosphorylating), ec:5.4.2.8 - mannose phosphomutase, ec:2.7.1.44 - galacturonokinase (phosphorylating) D-galacturonic acid kinase, ec:2.7.7.22 - guanylyltransferase (GDP), ec:5.1.3.6 - 4-epimerase, ec:3.2.1.14 - ChiC, ec:2.7.7.13 - guanylyltransferase, ec:5.1.3.12 - 5'-epimerase, ec:2.7.…
TR68958|c0_g1_i3	Amino sugar and nucleotide sugar metabolism, Galactose metabolism	map00520, map00052	46, 20	ec:5.1.3.2 - 4-epimerase, ec:2.4.2.24 - synthase, ec:2.7.7.9 - uridylyltransferase, ec:2.7.1.7 - mannokinase (phosphorylating), ec:5.4.2.8 - mannose phosphomutase, ec:2.7.1.44 - galacturonokinase (phosphorylating) D-galacturonic acid kinase, ec:2.7.7.22 - guanylyltransferase (GDP), ec:5.1.3.6 - 4-epimerase, ec:3.2.1.14 - ChiC, ec:2.7.7.13 - guanylyltransferase, ec:5.1.3.12 - 5'-epimerase, ec:2.7.…
TR72746|c3_g3_i1	Glyoxylate and dicarboxylate metabolism	map00630	34	ec:3.5.1.9 - kynurenine formamidase, ec:4.1.3.1 - lyase, ec:1.1.1.79 - reductase (NADP+), ec:2.7.1.31 - 3-kinase, ec:3.5.1.49 - ec:3.5.1.49 formamidase, ec:4.1.1.2 - decarboxylase, ec:1.1.1.60 - reductase, ec:3.1.3.18 - phosphatase, ec:1.1.1.37 - dehydrogenase, ec:1.1.99.14 - dehydrogenase, ec:2.1.2.1 - hydroxymethyltransferase, ec:1.1.1.81 - reductase, ec:6.3.1.2 - synthetase, ec:2.6.1.45 - tran…
TR70227|c0_g1_i1	Arginine biosynthesis	map00220	21	ec:3.5.1.16 - deacetylase, ec:6.3.4.5 - synthase, ec:1.4.1.2 - dehydrogenase, ec:6.3.1.2 - synthetase, ec:2.7.2.8 - kinase, ec:6.3.4.16 - synthase (ammonia), ec:2.6.1.1 - transaminase, ec:4.3.2.1 - lyase, ec:2.6.1.11 - transaminase, ec:2.3.1.35 - N-acetyltransferase, ec:1.4.1.3 - dehydrogenase [NAD(P)+], ec:2.3.1.1 - N-acetyltransferase, ec:3.5.1.14 - acid amidohydrolase, ec:2.6.1.2 - transaminas…
TR59520|c1_g1_i2	Pantothenate and CoA biosynthesis	map00770	19	ec:6.3.2.1 - ligase (AMP-forming), ec:3.5.2.2 - hydantoinase, ec:3.6.1.9 - diphosphatase, ec:1.3.1.2 - dehydrogenase (NADP+), ec:3.5.1.6 - N-carbamoyl-beta-alanine amidohydrolase, ec:4.2.1.9 - dehydratase, ec:6.3.2.5 - ligase (CTP), ec:1.1.1.169 - 2-reductase, ec:2.7.1.24 - kinase, ec:2.6.1.42 - transaminase, ec:1.1.1.86 - reductoisomerase (NADP+), ec:2.6.1.6 - transaminase, ec:2.2.1.6 - synthase…
TR68595|c2_g3_i1	Nicotinate and nicotinamide metabolism	map00760	17	ec:2.7.7.1 - adenylyltransferase, ec:3.6.1.9 - diphosphatase, ec:2.7.1.23 - kinase, ec:3.1.3.5 - uridine 5'-nucleotidase, ec:1.2.1.24 - dehydrogenase (NAD+), ec:1.2.1.16 - dehydrogenase [NAD(P)+], ec:3.2.2.1 - nucleosidase, ec:2.4.2.19 - diphosphorylase (carboxylating), ec:1.6.1.1 - transhydrogenase (Si-specific), ec:6.3.5.1 - synthase (glutamine-hydrolysing), ec:2.7.7.18 - adenylyltransferase, e…
TR59520|c1_g1_i3	Pantothenate and CoA biosynthesis	map00770	19	ec:6.3.2.1 - ligase (AMP-forming), ec:3.5.2.2 - hydantoinase, ec:3.6.1.9 - diphosphatase, ec:1.3.1.2 - dehydrogenase (NADP+), ec:3.5.1.6 - N-carbamoyl-beta-alanine amidohydrolase, ec:4.2.1.9 - dehydratase, ec:6.3.2.5 - ligase (CTP), ec:1.1.1.169 - 2-reductase, ec:2.7.1.24 - kinase, ec:2.6.1.42 - transaminase, ec:1.1.1.86 - reductoisomerase (NADP+), ec:2.6.1.6 - transaminase, ec:2.2.1.6 - synthase…
TR77925|c0_g1_i3	Other glycan degradation	map00511	8	ec:3.2.1.23 - lactase (ambiguous), ec:3.5.1.26 - aspartylglucosylamine deaspartylase, ec:3.2.1.96 - endo-beta-N-acetylglucosaminidase, ec:3.2.1.24 - alpha-D-mannosidase, ec:3.2.1.45 - psychosine hydrolase, ec:3.2.1.51 - alpha-fucosidase, ec:3.2.1.25 - mannanase, ec:3.2.1.52 - hexosaminidase
TR77925|c0_g1_i2	Other glycan degradation	map00511	8	ec:3.2.1.23 - lactase (ambiguous), ec:3.5.1.26 - aspartylglucosylamine deaspartylase, ec:3.2.1.96 - endo-beta-N-acetylglucosaminidase, ec:3.2.1.24 - alpha-D-mannosidase, ec:3.2.1.45 - psychosine hydrolase, ec:3.2.1.51 - alpha-fucosidase, ec:3.2.1.25 - mannanase, ec:3.2.1.52 - hexosaminidase
TR68595|c2_g3_i6	Nicotinate and nicotinamide metabolism	map00760	17	ec:2.7.7.1 - adenylyltransferase, ec:3.6.1.9 - diphosphatase, ec:2.7.1.23 - kinase, ec:3.1.3.5 - uridine 5'-nucleotidase, ec:1.2.1.24 - dehydrogenase (NAD+), ec:1.2.1.16 - dehydrogenase [NAD(P)+], ec:3.2.2.1 - nucleosidase, ec:2.4.2.19 - diphosphorylase (carboxylating), ec:1.6.1.1 - transhydrogenase (Si-specific), ec:6.3.5.1 - synthase (glutamine-hydrolysing), ec:2.7.7.18 - adenylyltransferase, e…
TR77925|c0_g1_i6	Other glycan degradation	map00511	8	ec:3.2.1.23 - lactase (ambiguous), ec:3.5.1.26 - aspartylglucosylamine deaspartylase, ec:3.2.1.96 - endo-beta-N-acetylglucosaminidase, ec:3.2.1.24 - alpha-D-mannosidase, ec:3.2.1.45 - psychosine hydrolase, ec:3.2.1.51 - alpha-fucosidase, ec:3.2.1.25 - mannanase, ec:3.2.1.52 - hexosaminidase
TR77925|c0_g1_i5	Other glycan degradation	map00511	8	ec:3.2.1.23 - lactase (ambiguous), ec:3.5.1.26 - aspartylglucosylamine deaspartylase, ec:3.2.1.96 - endo-beta-N-acetylglucosaminidase, ec:3.2.1.24 - alpha-D-mannosidase, ec:3.2.1.45 - psychosine hydrolase, ec:3.2.1.51 - alpha-fucosidase, ec:3.2.1.25 - mannanase, ec:3.2.1.52 - hexosaminidase
TR77131|c2_g3_i14	Glycine, serine and threonine metabolism, One carbon pool by folate	map00260, map00670	39, 14	ec:2.3.1.37 - synthase, ec:2.7.1.31 - 3-kinase, ec:1.2.1.11 - dehydrogenase, ec:4.3.1.18 - ammonia-lyase, ec:4.1.2.5 - aldolase, ec:2.7.1.39 - kinase, ec:2.1.2.1 - hydroxymethyltransferase, ec:1.1.1.81 - reductase, ec:2.1.1.5 - S-methyltransferase, ec:2.6.1.45 - transaminase, ec:1.5.3.10 - oxidase, ec:2.1.2.10 - S-aminomethyldihydrolipoylprotein:(6S)-tetrahydrofolate aminomethyltransferase (ammon…
Mj_1_GCCAAT_L005_R1_001_(paired)_trimmed_(paired)_contig_31943	alpha-Linolenic acid metabolism, Retinol metabolism, Chloroalkane and chloroalkene degradation, Glycine, serine and threonine metabolism, Fatty acid degradation, Tyrosine metabolism, Metabolism of xenobiotics by cytochrome P450, Tropane, piperidine and pyridine alkaloid biosynthesis, Naphthalene degradation, Drug metabolism - cytochrome P450, Glycolysis / Gluconeogenesis	map00592, map00830, map00625, map00260, map00071, map00350, map00980, map00960, map00626, map00982, map00010	11, 6, 5, 39, 14, 26, 8, 11, 2, 7, 28	ec:4.2.1.92 - dehydratase, ec:1.3.3.6 - oxidase, ec:2.3.1.16 - C-acyltransferase, ec:3.1.1.32 - A1, ec:1.3.1.42 - reductase, ec:1.1.1.1 - dehydrogenase, ec:1.13.11.12 - 13S-lipoxygenase, ec:5.3.99.6 - cyclase, ec:4.2.1.17 - hydratase, ec:2.1.1.141 - O-methyltransferase, ec:3.1.1.4 - A2, ec:1.2.1.36 - dehydrogenase, ec:1.14.14.1 - monooxygenase, ec:1.1.1.1 - dehydrogenase, ec:1.2.3.1 - oxidase, ec…
C914979	Pyruvate metabolism, Propanoate metabolism, Lysine degradation, Fatty acid degradation, Glyoxylate and dicarboxylate metabolism, Benzoate degradation, Synthesis and degradation of ketone bodies, Terpenoid backbone biosynthesis, Valine, leucine and isoleucine degradation, Butanoate metabolism, Carbon fixation pathways in prokaryotes, Tryptophan metabolism	map00620, map00640, map00310, map00071, map00630, map00362, map00072, map00900, map00280, map00650, map00720, map00380	33, 21, 12, 14, 34, 10, 4, 27, 21, 19, 21, 29	ec:4.1.1.32 - carboxykinase (GTP), ec:1.2.1.3 - dehydrogenase (NAD+), ec:1.1.1.79 - reductase (NADP+), ec:4.1.1.49 - carboxykinase (ATP), ec:2.3.1.12 - acetyltransferase, ec:1.1.2.3 - dehydrogenase (cytochrome), ec:1.1.1.37 - dehydrogenase, ec:1.1.1.28 - dehydrogenase, ec:3.1.2.1 - hydrolase, ec:2.7.9.1 - phosphate dikinase, ec:6.4.1.2 - carboxylase, ec:1.1.2.4 - dehydrogenase (cytochrome), ec:3.…
Mj_1_GCCAAT_L005_R1_001_(paired)_trimmed_(paired)_contig_5504	Arginine and proline metabolism	map00330	28	ec:1.2.1.3 - dehydrogenase (NAD+), ec:1.5.3.17 - polyamine oxidase, ec:1.2.1.41 - dehydrogenase, ec:3.5.3.12 - deiminase, ec:2.3.1.64 - N4-coumaroyltransferase, ec:2.7.3.3 - kinase, ec:1.14.11.2 - 4-dioxygenase, ec:4.1.1.50 - decarboxylase, ec:3.5.1.59 - amidase, ec:4.1.1.19 - decarboxylase, ec:2.6.1.1 - transaminase, ec:2.5.1.16 - synthase, ec:2.1.1.2 - N-methyltransferase, ec:1.5.1.19 - dehydro…
Mj_1_GCCAAT_L005_R1_001_(paired)_trimmed_(paired)_contig_5503	Glycerolipid metabolism, Cutin, suberine and wax biosynthesis	map00561, map00073	24, 4	ec:2.3.1.20 - O-acyltransferase, ec:1.2.1.3 - dehydrogenase (NAD+), ec:2.7.1.31 - 3-kinase, ec:2.3.1.51 - O-acyltransferase, ec:2.7.7.9 - uridylyltransferase, ec:1.1.1.21 - reductase, ec:2.4.1.46 - synthase, ec:3.2.1.22 - melibiase, ec:2.7.1.107 - kinase (ATP), ec:3.1.1.23 - lipase, ec:2.3.1.22 - O-acyltransferase, ec:2.4.1.241 - synthase, ec:3.13.1.1 - synthase, ec:2.4.1.184 - galactosyltransfer…
TR7189|c0_g1_i1	Carbon fixation in photosynthetic organisms, Pyruvate metabolism, Glyoxylate and dicarboxylate metabolism, Cysteine and methionine metabolism, Methane metabolism, Carbon fixation pathways in prokaryotes, Citrate cycle (TCA cycle)	map00710, map00620, map00630, map00270, map00680, map00720, map00020	22, 33, 34, 45, 23, 21, 18	ec:5.1.3.1 - 3-epimerase, ec:4.1.1.49 - carboxykinase (ATP), ec:2.7.2.3 - kinase, ec:1.1.1.37 - dehydrogenase, ec:5.3.1.1 - isomerase, ec:2.7.9.1 - phosphate dikinase, ec:2.6.1.1 - transaminase, ec:1.2.1.12 - dehydrogenase (phosphorylating), ec:3.1.3.11 - hexose diphosphatase, ec:5.3.1.6 - isomerase, ec:2.2.1.1 - glycolaldehydetransferase, ec:4.1.2.13 - aldolase, ec:1.1.1.82 - dehydrogenase (NADP…
C925626	Diterpenoid biosynthesis	map00904	11	ec:1.14.11.15 - 3beta-dioxygenase, ec:4.2.3.35 - synthase, ec:4.2.3.18 - synthase, ec:4.2.3.8 - synthase, ec:4.2.3.28 - synthase, ec:2.3.1.162 - O-acetyltransferase, ec:4.2.3.19 - synthase, ec:4.2.3.33 - synthase, ec:4.2.3.34 - synthase, ec:5.5.1.13 - diphosphate synthase, ec:2.3.1.167 - III 10-O-acetyltransferase
TR67242|c0_g2_i2	Amino sugar and nucleotide sugar metabolism, Fructose and mannose metabolism	map00520, map00051	46, 27	ec:5.1.3.2 - 4-epimerase, ec:2.4.2.24 - synthase, ec:2.7.7.9 - uridylyltransferase, ec:2.7.1.7 - mannokinase (phosphorylating), ec:5.4.2.8 - mannose phosphomutase, ec:2.7.1.44 - galacturonokinase (phosphorylating) D-galacturonic acid kinase, ec:2.7.7.22 - guanylyltransferase (GDP), ec:5.1.3.6 - 4-epimerase, ec:3.2.1.14 - ChiC, ec:2.7.7.13 - guanylyltransferase, ec:5.1.3.12 - 5'-epimerase, ec:2.7.…
TR67242|c0_g2_i1	Amino sugar and nucleotide sugar metabolism, Fructose and mannose metabolism	map00520, map00051	46, 27	ec:5.1.3.2 - 4-epimerase, ec:2.4.2.24 - synthase, ec:2.7.7.9 - uridylyltransferase, ec:2.7.1.7 - mannokinase (phosphorylating), ec:5.4.2.8 - mannose phosphomutase, ec:2.7.1.44 - galacturonokinase (phosphorylating) D-galacturonic acid kinase, ec:2.7.7.22 - guanylyltransferase (GDP), ec:5.1.3.6 - 4-epimerase, ec:3.2.1.14 - ChiC, ec:2.7.7.13 - guanylyltransferase, ec:5.1.3.12 - 5'-epimerase, ec:2.7.…
TR75317|c1_g1_i4	alpha-Linolenic acid metabolism, Lysine degradation, Fatty acid degradation, Aminobenzoate degradation, Limonene and pinene degradation, Tryptophan metabolism, Caprolactam degradation, Geraniol degradation, Propanoate metabolism, Phenylalanine metabolism, Benzoate degradation, beta-Alanine metabolism, Valine, leucine and isoleucine degradation, Butanoate metabolism, Fatty acid elongation, Carbon …	map00592, map00310, map00071, map00627, map00903, map00380, map00930, map00281, map00640, map00360, map00362, map00410, map00280, map00650, map00062, map00720	11, 12, 14, 11, 2, 29, 8, 4, 21, 22, 10, 17, 21, 19, 7, 21	ec:4.2.1.92 - dehydratase, ec:1.3.3.6 - oxidase, ec:2.3.1.16 - C-acyltransferase, ec:3.1.1.32 - A1, ec:1.3.1.42 - reductase, ec:1.1.1.1 - dehydrogenase, ec:1.13.11.12 - 13S-lipoxygenase, ec:5.3.99.6 - cyclase, ec:4.2.1.17 - hydratase, ec:2.1.1.141 - O-methyltransferase, ec:3.1.1.4 - A2, ec:1.2.1.3 - dehydrogenase (NAD+), ec:1.5.1.10 - dehydrogenase (NADP+, L-glutamate-forming), ec:1.2.4.2 - dehyd…
TR75317|c1_g1_i3	alpha-Linolenic acid metabolism, Lysine degradation, Fatty acid degradation, Aminobenzoate degradation, Limonene and pinene degradation, Tryptophan metabolism, Caprolactam degradation, Geraniol degradation, Propanoate metabolism, Phenylalanine metabolism, Benzoate degradation, beta-Alanine metabolism, Valine, leucine and isoleucine degradation, Butanoate metabolism, Fatty acid elongation, Carbon …	map00592, map00310, map00071, map00627, map00903, map00380, map00930, map00281, map00640, map00360, map00362, map00410, map00280, map00650, map00062, map00720	11, 12, 14, 11, 2, 29, 8, 4, 21, 22, 10, 17, 21, 19, 7, 21	ec:4.2.1.92 - dehydratase, ec:1.3.3.6 - oxidase, ec:2.3.1.16 - C-acyltransferase, ec:3.1.1.32 - A1, ec:1.3.1.42 - reductase, ec:1.1.1.1 - dehydrogenase, ec:1.13.11.12 - 13S-lipoxygenase, ec:5.3.99.6 - cyclase, ec:4.2.1.17 - hydratase, ec:2.1.1.141 - O-methyltransferase, ec:3.1.1.4 - A2, ec:1.2.1.3 - dehydrogenase (NAD+), ec:1.5.1.10 - dehydrogenase (NADP+, L-glutamate-forming), ec:1.2.4.2 - dehyd…
TR75317|c1_g1_i2	alpha-Linolenic acid metabolism, Lysine degradation, Fatty acid degradation, Aminobenzoate degradation, Limonene and pinene degradation, Tryptophan metabolism, Caprolactam degradation, Geraniol degradation, Propanoate metabolism, Phenylalanine metabolism, Benzoate degradation, beta-Alanine metabolism, Valine, leucine and isoleucine degradation, Butanoate metabolism, Fatty acid elongation, Carbon …	map00592, map00310, map00071, map00627, map00903, map00380, map00930, map00281, map00640, map00360, map00362, map00410, map00280, map00650, map00062, map00720	11, 12, 14, 11, 2, 29, 8, 4, 21, 22, 10, 17, 21, 19, 7, 21	ec:4.2.1.92 - dehydratase, ec:1.3.3.6 - oxidase, ec:2.3.1.16 - C-acyltransferase, ec:3.1.1.32 - A1, ec:1.3.1.42 - reductase, ec:1.1.1.1 - dehydrogenase, ec:1.13.11.12 - 13S-lipoxygenase, ec:5.3.99.6 - cyclase, ec:4.2.1.17 - hydratase, ec:2.1.1.141 - O-methyltransferase, ec:3.1.1.4 - A2, ec:1.2.1.3 - dehydrogenase (NAD+), ec:1.5.1.10 - dehydrogenase (NADP+, L-glutamate-forming), ec:1.2.4.2 - dehyd…
C877461	T cell receptor signaling pathway, Th1 and Th2 cell differentiation, PD-L1 expression and PD-1 checkpoint pathway in cancer	map04660, map04658, map05235	2, 1, 1	ec:2.7.10.2 - protein-tyrosine kinase, ec:3.1.3.16 - phosphatase, ec:3.1.3.16 - phosphatase, ec:3.1.3.16 - phosphatase
TR75317|c1_g1_i1	alpha-Linolenic acid metabolism, Lysine degradation, Fatty acid degradation, Aminobenzoate degradation, Limonene and pinene degradation, Tryptophan metabolism, Caprolactam degradation, Geraniol degradation, Propanoate metabolism, Phenylalanine metabolism, Benzoate degradation, beta-Alanine metabolism, Valine, leucine and isoleucine degradation, Butanoate metabolism, Fatty acid elongation, Carbon …	map00592, map00310, map00071, map00627, map00903, map00380, map00930, map00281, map00640, map00360, map00362, map00410, map00280, map00650, map00062, map00720	11, 12, 14, 11, 2, 29, 8, 4, 21, 22, 10, 17, 21, 19, 7, 21	ec:4.2.1.92 - dehydratase, ec:1.3.3.6 - oxidase, ec:2.3.1.16 - C-acyltransferase, ec:3.1.1.32 - A1, ec:1.3.1.42 - reductase, ec:1.1.1.1 - dehydrogenase, ec:1.13.11.12 - 13S-lipoxygenase, ec:5.3.99.6 - cyclase, ec:4.2.1.17 - hydratase, ec:2.1.1.141 - O-methyltransferase, ec:3.1.1.4 - A2, ec:1.2.1.3 - dehydrogenase (NAD+), ec:1.5.1.10 - dehydrogenase (NADP+, L-glutamate-forming), ec:1.2.4.2 - dehyd…
TR67375|c1_g1_i2	Purine metabolism	map00230	60	ec:3.6.1.15 - phosphatase, ec:4.6.1.2 - cyclase, ec:3.2.2.7 - nucleosidase, ec:3.6.1.9 - diphosphatase, ec:1.17.4.1 - reductase, ec:2.7.4.10 - kinase, ec:6.3.3.1 - cyclo-ligase, ec:1.7.3.3 - urate hydroxylase, ec:3.1.3.5 - uridine 5'-nucleotidase, ec:2.7.1.74 - kinase, ec:6.3.2.6 - synthase, ec:3.5.3.9 - deiminase, ec:3.2.2.1 - nucleosidase, ec:1.17.3.2 - oxidase, ec:2.7.4.3 - kinase, ec:3.5.2.17…
Mj_1_GCCAAT_L005_R1_001_(paired)_trimmed_(paired)_contig_6821	Glycine, serine and threonine metabolism, Glyoxylate and dicarboxylate metabolism, One carbon pool by folate, Cyanoamino acid metabolism, Methane metabolism	map00260, map00630, map00670, map00460, map00680	39, 34, 14, 13, 23	ec:2.3.1.37 - synthase, ec:2.7.1.31 - 3-kinase, ec:1.2.1.11 - dehydrogenase, ec:4.3.1.18 - ammonia-lyase, ec:4.1.2.5 - aldolase, ec:2.7.1.39 - kinase, ec:2.1.2.1 - hydroxymethyltransferase, ec:1.1.1.81 - reductase, ec:2.1.1.5 - S-methyltransferase, ec:2.6.1.45 - transaminase, ec:1.5.3.10 - oxidase, ec:2.1.2.10 - S-aminomethyldihydrolipoylprotein:(6S)-tetrahydrofolate aminomethyltransferase (ammon…
C795855	Purine metabolism	map00230	60	ec:3.6.1.15 - phosphatase, ec:4.6.1.2 - cyclase, ec:3.2.2.7 - nucleosidase, ec:3.6.1.9 - diphosphatase, ec:1.17.4.1 - reductase, ec:2.7.4.10 - kinase, ec:6.3.3.1 - cyclo-ligase, ec:1.7.3.3 - urate hydroxylase, ec:3.1.3.5 - uridine 5'-nucleotidase, ec:2.7.1.74 - kinase, ec:6.3.2.6 - synthase, ec:3.5.3.9 - deiminase, ec:3.2.2.1 - nucleosidase, ec:1.17.3.2 - oxidase, ec:2.7.4.3 - kinase, ec:3.5.2.17…
TR69819|c0_g1_i4	T cell receptor signaling pathway	map04660	2	ec:2.7.10.2 - protein-tyrosine kinase, ec:3.1.3.16 - phosphatase
TR98884|c0_g1_i1	Carbon fixation in photosynthetic organisms, Pyruvate metabolism	map00710, map00620	22, 33	ec:5.1.3.1 - 3-epimerase, ec:4.1.1.49 - carboxykinase (ATP), ec:2.7.2.3 - kinase, ec:1.1.1.37 - dehydrogenase, ec:5.3.1.1 - isomerase, ec:2.7.9.1 - phosphate dikinase, ec:2.6.1.1 - transaminase, ec:1.2.1.12 - dehydrogenase (phosphorylating), ec:3.1.3.11 - hexose diphosphatase, ec:5.3.1.6 - isomerase, ec:2.2.1.1 - glycolaldehydetransferase, ec:4.1.2.13 - aldolase, ec:1.1.1.82 - dehydrogenase (NADP…
TR71669|c0_g1_i2	Starch and sucrose metabolism	map00500	35	ec:3.2.1.4 - endo-1,4-beta-D-glucanase, ec:3.2.1.26 - invertase, ec:3.6.1.9 - diphosphatase, ec:2.7.7.9 - uridylyltransferase, ec:2.4.1.15 - synthase (UDP-forming), ec:3.2.1.1 - glycogenase, ec:3.2.1.39 - endo-1,3-beta-D-glucosidase, ec:2.4.1.21 - synthase (glycosyl-transferring), ec:2.4.1.12 - synthase (UDP-forming), ec:2.7.1.4 - fructokinase (phosphorylating), ec:5.3.1.9 - isomerase, ec:2.4.1.3…
TR32702|c1_g1_i1	Pyruvate metabolism, Propanoate metabolism, Glycine, serine and threonine metabolism, Lysine degradation, Valine, leucine and isoleucine degradation, Glycolysis / Gluconeogenesis, Tryptophan metabolism, Citrate cycle (TCA cycle)	map00620, map00640, map00260, map00310, map00280, map00010, map00380, map00020	33, 21, 39, 12, 21, 28, 29, 18	ec:4.1.1.32 - carboxykinase (GTP), ec:1.2.1.3 - dehydrogenase (NAD+), ec:1.1.1.79 - reductase (NADP+), ec:4.1.1.49 - carboxykinase (ATP), ec:2.3.1.12 - acetyltransferase, ec:1.1.2.3 - dehydrogenase (cytochrome), ec:1.1.1.37 - dehydrogenase, ec:1.1.1.28 - dehydrogenase, ec:3.1.2.1 - hydrolase, ec:2.7.9.1 - phosphate dikinase, ec:6.4.1.2 - carboxylase, ec:1.1.2.4 - dehydrogenase (cytochrome), ec:3.…
TR69819|c0_g1_i5	T cell receptor signaling pathway	map04660	2	ec:2.7.10.2 - protein-tyrosine kinase, ec:3.1.3.16 - phosphatase
TR74237|c0_g1_i3	Pyruvate metabolism, Purine metabolism, Glycolysis / Gluconeogenesis	map00620, map00230, map00010	33, 60, 28	ec:4.1.1.32 - carboxykinase (GTP), ec:1.2.1.3 - dehydrogenase (NAD+), ec:1.1.1.79 - reductase (NADP+), ec:4.1.1.49 - carboxykinase (ATP), ec:2.3.1.12 - acetyltransferase, ec:1.1.2.3 - dehydrogenase (cytochrome), ec:1.1.1.37 - dehydrogenase, ec:1.1.1.28 - dehydrogenase, ec:3.1.2.1 - hydrolase, ec:2.7.9.1 - phosphate dikinase, ec:6.4.1.2 - carboxylase, ec:1.1.2.4 - dehydrogenase (cytochrome), ec:3.…
C757571	Fructose and mannose metabolism	map00051	27	ec:5.3.1.5 - isomerase, ec:1.1.1.21 - reductase, ec:2.7.1.7 - mannokinase (phosphorylating), ec:5.4.2.8 - mannose phosphomutase, ec:2.7.7.22 - guanylyltransferase (GDP), ec:1.1.1.67 - 2-dehydrogenase, ec:3.2.1.78 - endo-1,4-beta-mannosidase, ec:1.1.1.122 - 1-dehydrogenase, ec:5.3.1.1 - isomerase, ec:2.7.7.13 - guanylyltransferase, ec:2.7.1.11 - phosphohexokinase, ec:2.7.1.4 - fructokinase (phosph…
Mj_1_GCCAAT_L005_R1_001_(paired)_trimmed_(paired)_contig_42602	Amino sugar and nucleotide sugar metabolism	map00520	46	ec:5.1.3.2 - 4-epimerase, ec:2.4.2.24 - synthase, ec:2.7.7.9 - uridylyltransferase, ec:2.7.1.7 - mannokinase (phosphorylating), ec:5.4.2.8 - mannose phosphomutase, ec:2.7.1.44 - galacturonokinase (phosphorylating) D-galacturonic acid kinase, ec:2.7.7.22 - guanylyltransferase (GDP), ec:5.1.3.6 - 4-epimerase, ec:3.2.1.14 - ChiC, ec:2.7.7.13 - guanylyltransferase, ec:5.1.3.12 - 5'-epimerase, ec:2.7.…
TR69498|c1_g1_i2	Porphyrin and chlorophyll metabolism	map00860	31	ec:2.3.1.37 - synthase, ec:3.1.1.14 - CLH, ec:1.3.7.4 - oxidoreductase, ec:4.99.1.4 - ferrochelatase, ec:4.2.1.75 - synthase, ec:3.2.1.31 - beta-glucuronide glucuronohydrolase glucuronidase, ec:4.1.1.37 - decarboxylase, ec:1.3.1.75 - protochlorophyllide a 8-vinyl-reductase (NADPH), ec:4.2.1.24 - synthase, ec:5.4.3.8 - 2,1-aminomutase, ec:1.3.1.33 - reductase, ec:2.1.1.107 - C-methyltransferase, e…
TR37264|c0_g2_i2	Alanine, aspartate and glutamate metabolism, Propanoate metabolism, Arginine biosynthesis, beta-Alanine metabolism, Butanoate metabolism	map00250, map00640, map00220, map00410, map00650	29, 21, 21, 17, 19	ec:1.4.1.14 - synthase (NADH), ec:4.1.1.15 - decarboxylase, ec:6.3.4.5 - synthase, ec:1.4.1.2 - dehydrogenase, ec:1.2.1.24 - dehydrogenase (NAD+), ec:6.3.1.2 - synthetase, ec:3.5.1.3 - alpha-keto acid-omega-amidase, ec:1.2.1.16 - dehydrogenase [NAD(P)+], ec:6.3.4.16 - synthase (ammonia), ec:6.3.5.5 - synthase (glutamine-hydrolysing), ec:2.6.1.1 - transaminase, ec:4.3.2.1 - lyase, ec:1.4.3.2 - oxi…
C876115	Oxidative phosphorylation	map00190	3	ec:3.6.1.1 - diphosphatase, ec:1.3.5.1 - dehydrogenase, ec:1.6.99.3 - dehydrogenase
TR122441|c0_g1_i1	Glyoxylate and dicarboxylate metabolism, Tryptophan metabolism	map00630, map00380	34, 29	ec:3.5.1.9 - kynurenine formamidase, ec:4.1.3.1 - lyase, ec:1.1.1.79 - reductase (NADP+), ec:2.7.1.31 - 3-kinase, ec:3.5.1.49 - ec:3.5.1.49 formamidase, ec:4.1.1.2 - decarboxylase, ec:1.1.1.60 - reductase, ec:3.1.3.18 - phosphatase, ec:1.1.1.37 - dehydrogenase, ec:1.1.99.14 - dehydrogenase, ec:2.1.2.1 - hydroxymethyltransferase, ec:1.1.1.81 - reductase, ec:6.3.1.2 - synthetase, ec:2.6.1.45 - tran…
TR5681|c0_g1_i1	Lysine degradation	map00310	12	ec:1.2.1.3 - dehydrogenase (NAD+), ec:1.5.1.10 - dehydrogenase (NADP+, L-glutamate-forming), ec:1.2.4.2 - dehydrogenase (succinyl-transferring), ec:1.14.11.4 - 5-dioxygenase, ec:1.1.1.35 - dehydrogenase, ec:2.6.1.21 - transaminase, ec:2.3.1.61 - succinyltransferase, ec:1.8.1.4 - dehydrogenase, ec:1.14.11.8 - dioxygenase, ec:2.3.1.9 - C-acetyltransferase, ec:4.2.1.17 - hydratase, ec:1.5.1.8 - dehy…
TR68890|c2_g1_i8	Porphyrin and chlorophyll metabolism	map00860	31	ec:2.3.1.37 - synthase, ec:3.1.1.14 - CLH, ec:1.3.7.4 - oxidoreductase, ec:4.99.1.4 - ferrochelatase, ec:4.2.1.75 - synthase, ec:3.2.1.31 - beta-glucuronide glucuronohydrolase glucuronidase, ec:4.1.1.37 - decarboxylase, ec:1.3.1.75 - protochlorophyllide a 8-vinyl-reductase (NADPH), ec:4.2.1.24 - synthase, ec:5.4.3.8 - 2,1-aminomutase, ec:1.3.1.33 - reductase, ec:2.1.1.107 - C-methyltransferase, e…
TR68890|c2_g1_i7	Porphyrin and chlorophyll metabolism	map00860	31	ec:2.3.1.37 - synthase, ec:3.1.1.14 - CLH, ec:1.3.7.4 - oxidoreductase, ec:4.99.1.4 - ferrochelatase, ec:4.2.1.75 - synthase, ec:3.2.1.31 - beta-glucuronide glucuronohydrolase glucuronidase, ec:4.1.1.37 - decarboxylase, ec:1.3.1.75 - protochlorophyllide a 8-vinyl-reductase (NADPH), ec:4.2.1.24 - synthase, ec:5.4.3.8 - 2,1-aminomutase, ec:1.3.1.33 - reductase, ec:2.1.1.107 - C-methyltransferase, e…
TR70407|c0_g1_i6	Purine metabolism	map00230	60	ec:3.6.1.15 - phosphatase, ec:4.6.1.2 - cyclase, ec:3.2.2.7 - nucleosidase, ec:3.6.1.9 - diphosphatase, ec:1.17.4.1 - reductase, ec:2.7.4.10 - kinase, ec:6.3.3.1 - cyclo-ligase, ec:1.7.3.3 - urate hydroxylase, ec:3.1.3.5 - uridine 5'-nucleotidase, ec:2.7.1.74 - kinase, ec:6.3.2.6 - synthase, ec:3.5.3.9 - deiminase, ec:3.2.2.1 - nucleosidase, ec:1.17.3.2 - oxidase, ec:2.7.4.3 - kinase, ec:3.5.2.17…
TR116907|c0_g1_i1	Phosphatidylinositol signaling system, Streptomycin biosynthesis, Inositol phosphate metabolism	map04070, map00521, map00562	20, 10, 25	ec:2.7.1.127 - 3-kinase, ec:2.7.1.158 - 2-kinase, ec:3.1.3.56 - 5-phosphatase, ec:2.7.1.107 - kinase (ATP), ec:2.7.1.137 - 3-kinase, ec:2.7.1.151 - multikinase, ec:3.1.4.11 - phospholipase C, ec:2.7.1.159 - 5/6-kinase, ec:3.1.3.36 - 5-phosphatase, ec:2.7.11.13 - kinase C, ec:3.1.3.57 - 1-phosphatase, ec:2.7.1.67 - 4-kinase, ec:2.7.8.11 - 3-phosphatidyltransferase, ec:2.7.7.41 - cytidylyltransfera…
TR70407|c0_g1_i5	Purine metabolism	map00230	60	ec:3.6.1.15 - phosphatase, ec:4.6.1.2 - cyclase, ec:3.2.2.7 - nucleosidase, ec:3.6.1.9 - diphosphatase, ec:1.17.4.1 - reductase, ec:2.7.4.10 - kinase, ec:6.3.3.1 - cyclo-ligase, ec:1.7.3.3 - urate hydroxylase, ec:3.1.3.5 - uridine 5'-nucleotidase, ec:2.7.1.74 - kinase, ec:6.3.2.6 - synthase, ec:3.5.3.9 - deiminase, ec:3.2.2.1 - nucleosidase, ec:1.17.3.2 - oxidase, ec:2.7.4.3 - kinase, ec:3.5.2.17…
TR73556|c0_g1_i9	Oxidative phosphorylation	map00190	3	ec:3.6.1.1 - diphosphatase, ec:1.3.5.1 - dehydrogenase, ec:1.6.99.3 - dehydrogenase
TR70407|c0_g1_i2	Purine metabolism	map00230	60	ec:3.6.1.15 - phosphatase, ec:4.6.1.2 - cyclase, ec:3.2.2.7 - nucleosidase, ec:3.6.1.9 - diphosphatase, ec:1.17.4.1 - reductase, ec:2.7.4.10 - kinase, ec:6.3.3.1 - cyclo-ligase, ec:1.7.3.3 - urate hydroxylase, ec:3.1.3.5 - uridine 5'-nucleotidase, ec:2.7.1.74 - kinase, ec:6.3.2.6 - synthase, ec:3.5.3.9 - deiminase, ec:3.2.2.1 - nucleosidase, ec:1.17.3.2 - oxidase, ec:2.7.4.3 - kinase, ec:3.5.2.17…
TR68890|c2_g1_i4	Porphyrin and chlorophyll metabolism	map00860	31	ec:2.3.1.37 - synthase, ec:3.1.1.14 - CLH, ec:1.3.7.4 - oxidoreductase, ec:4.99.1.4 - ferrochelatase, ec:4.2.1.75 - synthase, ec:3.2.1.31 - beta-glucuronide glucuronohydrolase glucuronidase, ec:4.1.1.37 - decarboxylase, ec:1.3.1.75 - protochlorophyllide a 8-vinyl-reductase (NADPH), ec:4.2.1.24 - synthase, ec:5.4.3.8 - 2,1-aminomutase, ec:1.3.1.33 - reductase, ec:2.1.1.107 - C-methyltransferase, e…
Mj_1_GCCAAT_L005_R1_001_(paired)_trimmed_(paired)_contig_54609	T cell receptor signaling pathway	map04660	2	ec:2.7.10.2 - protein-tyrosine kinase, ec:3.1.3.16 - phosphatase
TR68890|c2_g1_i3	Porphyrin and chlorophyll metabolism	map00860	31	ec:2.3.1.37 - synthase, ec:3.1.1.14 - CLH, ec:1.3.7.4 - oxidoreductase, ec:4.99.1.4 - ferrochelatase, ec:4.2.1.75 - synthase, ec:3.2.1.31 - beta-glucuronide glucuronohydrolase glucuronidase, ec:4.1.1.37 - decarboxylase, ec:1.3.1.75 - protochlorophyllide a 8-vinyl-reductase (NADPH), ec:4.2.1.24 - synthase, ec:5.4.3.8 - 2,1-aminomutase, ec:1.3.1.33 - reductase, ec:2.1.1.107 - C-methyltransferase, e…
TR68890|c2_g1_i2	Porphyrin and chlorophyll metabolism	map00860	31	ec:2.3.1.37 - synthase, ec:3.1.1.14 - CLH, ec:1.3.7.4 - oxidoreductase, ec:4.99.1.4 - ferrochelatase, ec:4.2.1.75 - synthase, ec:3.2.1.31 - beta-glucuronide glucuronohydrolase glucuronidase, ec:4.1.1.37 - decarboxylase, ec:1.3.1.75 - protochlorophyllide a 8-vinyl-reductase (NADPH), ec:4.2.1.24 - synthase, ec:5.4.3.8 - 2,1-aminomutase, ec:1.3.1.33 - reductase, ec:2.1.1.107 - C-methyltransferase, e…
TR64213|c4_g1_i1	Amino sugar and nucleotide sugar metabolism	map00520	46	ec:5.1.3.2 - 4-epimerase, ec:2.4.2.24 - synthase, ec:2.7.7.9 - uridylyltransferase, ec:2.7.1.7 - mannokinase (phosphorylating), ec:5.4.2.8 - mannose phosphomutase, ec:2.7.1.44 - galacturonokinase (phosphorylating) D-galacturonic acid kinase, ec:2.7.7.22 - guanylyltransferase (GDP), ec:5.1.3.6 - 4-epimerase, ec:3.2.1.14 - ChiC, ec:2.7.7.13 - guanylyltransferase, ec:5.1.3.12 - 5'-epimerase, ec:2.7.…
TR68194|c4_g5_i2	T cell receptor signaling pathway	map04660	2	ec:2.7.10.2 - protein-tyrosine kinase, ec:3.1.3.16 - phosphatase
TR69099|c0_g1_i9	Valine, leucine and isoleucine degradation	map00280	21	ec:1.2.1.3 - dehydrogenase (NAD+), ec:2.3.1.168 - (2-methylpropanoyl)transferase, ec:4.2.1.18 - hydratase, ec:2.3.1.16 - C-acyltransferase, ec:1.3.99.12 - dehydrogenase, ec:2.6.1.42 - transaminase, ec:1.4.3.2 - oxidase, ec:2.6.1.6 - transaminase, ec:1.1.1.35 - dehydrogenase, ec:6.4.1.3 - carboxylase, ec:1.8.1.4 - dehydrogenase, ec:1.2.3.1 - oxidase, ec:1.2.4.4 - dehydrogenase (2-methylpropanoyl-t…
TR29199|c0_g1_i1	Alanine, aspartate and glutamate metabolism, Arginine biosynthesis, Nitrogen metabolism, Glyoxylate and dicarboxylate metabolism	map00250, map00220, map00910, map00630	29, 21, 18, 34	ec:1.4.1.14 - synthase (NADH), ec:4.1.1.15 - decarboxylase, ec:6.3.4.5 - synthase, ec:1.4.1.2 - dehydrogenase, ec:1.2.1.24 - dehydrogenase (NAD+), ec:6.3.1.2 - synthetase, ec:3.5.1.3 - alpha-keto acid-omega-amidase, ec:1.2.1.16 - dehydrogenase [NAD(P)+], ec:6.3.4.16 - synthase (ammonia), ec:6.3.5.5 - synthase (glutamine-hydrolysing), ec:2.6.1.1 - transaminase, ec:4.3.2.1 - lyase, ec:1.4.3.2 - oxi…
TR68194|c4_g5_i1	T cell receptor signaling pathway	map04660	2	ec:2.7.10.2 - protein-tyrosine kinase, ec:3.1.3.16 - phosphatase
TR78749|c0_g2_i1	Anthocyanin biosynthesis	map00942	4	ec:2.4.1.238 - 3,5-di-O-glucoside 3'-O-glucosyltransferase, ec:2.3.1.153 - 5-(6'''-hydroxycinnamoyltransferase), ec:2.4.1.115 - 3-O-glucosyltransferase, ec:2.3.1.171 - 6''-O-malonyltransferase
TR52507|c0_g1_i2	Flavonoid biosynthesis, Stilbenoid, diarylheptanoid and gingerol biosynthesis, Phenylpropanoid biosynthesis	map00941, map00945, map00940	10, 3, 17	ec:1.1.1.234 - 4-reductase, ec:1.17.1.3 - reductase, ec:2.3.1.170 - synthase, ec:2.1.1.104 - O-methyltransferase, ec:2.3.1.74 - synthase, ec:5.5.1.6 - isomerase, ec:1.3.1.77 - reductase [(2R,3R)-flavan-3-ol-forming], ec:1.1.1.219 - 4-reductase, ec:2.3.1.133 - O-hydroxycinnamoyltransferase, ec:1.14.11.9 - 3-dioxygenase, ec:2.1.1.104 - O-methyltransferase, ec:2.3.1.99 - O-hydroxycinnamoyltransferas…
TR52507|c0_g1_i1	Flavonoid biosynthesis, Stilbenoid, diarylheptanoid and gingerol biosynthesis, Phenylpropanoid biosynthesis	map00941, map00945, map00940	10, 3, 17	ec:1.1.1.234 - 4-reductase, ec:1.17.1.3 - reductase, ec:2.3.1.170 - synthase, ec:2.1.1.104 - O-methyltransferase, ec:2.3.1.74 - synthase, ec:5.5.1.6 - isomerase, ec:1.3.1.77 - reductase [(2R,3R)-flavan-3-ol-forming], ec:1.1.1.219 - 4-reductase, ec:2.3.1.133 - O-hydroxycinnamoyltransferase, ec:1.14.11.9 - 3-dioxygenase, ec:2.1.1.104 - O-methyltransferase, ec:2.3.1.99 - O-hydroxycinnamoyltransferas…
TR59971|c0_g1_i9	Pyruvate metabolism	map00620	33	ec:4.1.1.32 - carboxykinase (GTP), ec:1.2.1.3 - dehydrogenase (NAD+), ec:1.1.1.79 - reductase (NADP+), ec:4.1.1.49 - carboxykinase (ATP), ec:2.3.1.12 - acetyltransferase, ec:1.1.2.3 - dehydrogenase (cytochrome), ec:1.1.1.37 - dehydrogenase, ec:1.1.1.28 - dehydrogenase, ec:3.1.2.1 - hydrolase, ec:2.7.9.1 - phosphate dikinase, ec:6.4.1.2 - carboxylase, ec:1.1.2.4 - dehydrogenase (cytochrome), ec:3.…
TR59971|c0_g1_i4	Pyruvate metabolism	map00620	33	ec:4.1.1.32 - carboxykinase (GTP), ec:1.2.1.3 - dehydrogenase (NAD+), ec:1.1.1.79 - reductase (NADP+), ec:4.1.1.49 - carboxykinase (ATP), ec:2.3.1.12 - acetyltransferase, ec:1.1.2.3 - dehydrogenase (cytochrome), ec:1.1.1.37 - dehydrogenase, ec:1.1.1.28 - dehydrogenase, ec:3.1.2.1 - hydrolase, ec:2.7.9.1 - phosphate dikinase, ec:6.4.1.2 - carboxylase, ec:1.1.2.4 - dehydrogenase (cytochrome), ec:3.…
TR69099|c0_g1_i3	Propanoate metabolism, Glyoxylate and dicarboxylate metabolism, Valine, leucine and isoleucine degradation, Carbon fixation pathways in prokaryotes	map00640, map00630, map00280, map00720	21, 34, 21, 21	ec:4.1.1.9 - decarboxylase, ec:2.3.1.168 - (2-methylpropanoyl)transferase, ec:1.3.3.6 - oxidase, ec:4.2.1.79 - dehydratase, ec:6.4.1.2 - carboxylase, ec:4.1.3.30 - lyase, ec:2.6.1.19 - transaminase, ec:6.2.1.4 - ligase (GDP-forming), ec:6.2.1.1 - ligase, ec:6.4.1.3 - carboxylase, ec:1.8.1.4 - dehydrogenase, ec:1.2.4.4 - dehydrogenase (2-methylpropanoyl-transferring), ec:2.8.3.8 - CoA-transferase,…
Mj_1_GCCAAT_L005_R1_001_(paired)_trimmed_(paired)_contig_31982	Indole alkaloid biosynthesis	map00901	6	ec:1.14.11.20 - 4-hydroxylase, ec:3.1.1.78 - esterase, ec:2.4.1.219 - glucosyltransferase, ec:4.3.3.2 - synthase, ec:3.2.1.125 - beta-glucosidase, ec:3.2.1.105 - beta-glucosidase
TR69099|c0_g1_i8	Propanoate metabolism, Glyoxylate and dicarboxylate metabolism, Valine, leucine and isoleucine degradation, Carbon fixation pathways in prokaryotes	map00640, map00630, map00280, map00720	21, 34, 21, 21	ec:4.1.1.9 - decarboxylase, ec:2.3.1.168 - (2-methylpropanoyl)transferase, ec:1.3.3.6 - oxidase, ec:4.2.1.79 - dehydratase, ec:6.4.1.2 - carboxylase, ec:4.1.3.30 - lyase, ec:2.6.1.19 - transaminase, ec:6.2.1.4 - ligase (GDP-forming), ec:6.2.1.1 - ligase, ec:6.4.1.3 - carboxylase, ec:1.8.1.4 - dehydrogenase, ec:1.2.4.4 - dehydrogenase (2-methylpropanoyl-transferring), ec:2.8.3.8 - CoA-transferase,…
TR47226|c2_g1_i1	Phosphatidylinositol signaling system, Sulfur metabolism, Streptomycin biosynthesis, Inositol phosphate metabolism	map04070, map00920, map00521, map00562	20, 16, 10, 25	ec:2.7.1.127 - 3-kinase, ec:2.7.1.158 - 2-kinase, ec:3.1.3.56 - 5-phosphatase, ec:2.7.1.107 - kinase (ATP), ec:2.7.1.137 - 3-kinase, ec:2.7.1.151 - multikinase, ec:3.1.4.11 - phospholipase C, ec:2.7.1.159 - 5/6-kinase, ec:3.1.3.36 - 5-phosphatase, ec:2.7.11.13 - kinase C, ec:3.1.3.57 - 1-phosphatase, ec:2.7.1.67 - 4-kinase, ec:2.7.8.11 - 3-phosphatidyltransferase, ec:2.7.7.41 - cytidylyltransfera…
Mj_1_GCCAAT_L005_R1_001_(paired)_trimmed_(paired)_contig_5544	Porphyrin and chlorophyll metabolism	map00860	31	ec:2.3.1.37 - synthase, ec:3.1.1.14 - CLH, ec:1.3.7.4 - oxidoreductase, ec:4.99.1.4 - ferrochelatase, ec:4.2.1.75 - synthase, ec:3.2.1.31 - beta-glucuronide glucuronohydrolase glucuronidase, ec:4.1.1.37 - decarboxylase, ec:1.3.1.75 - protochlorophyllide a 8-vinyl-reductase (NADPH), ec:4.2.1.24 - synthase, ec:5.4.3.8 - 2,1-aminomutase, ec:1.3.1.33 - reductase, ec:2.1.1.107 - C-methyltransferase, e…
TR60489|c0_g1_i1	Glycerophospholipid metabolism	map00564	33	ec:3.1.4.4 - D, ec:3.1.1.52 - deacylase, ec:2.3.1.51 - O-acyltransferase, ec:2.7.8.5 - 1-phosphatidyltransferase, ec:2.1.1.17 - N-methyltransferase, ec:1.1.1.8 - dehydrogenase (NAD+), ec:2.7.8.1 - EPT, ec:2.1.1.103 - N-methyltransferase, ec:2.7.1.107 - kinase (ATP), ec:3.1.1.32 - A1, ec:3.6.1.16 - diphosphatase, ec:2.7.1.32 - kinase, ec:3.1.3.75 - phosphatase, ec:1.1.1.94 - dehydrogenase [NAD(P)+…
TR77750|c0_g5_i3	Purine metabolism	map00230	60	ec:3.6.1.15 - phosphatase, ec:4.6.1.2 - cyclase, ec:3.2.2.7 - nucleosidase, ec:3.6.1.9 - diphosphatase, ec:1.17.4.1 - reductase, ec:2.7.4.10 - kinase, ec:6.3.3.1 - cyclo-ligase, ec:1.7.3.3 - urate hydroxylase, ec:3.1.3.5 - uridine 5'-nucleotidase, ec:2.7.1.74 - kinase, ec:6.3.2.6 - synthase, ec:3.5.3.9 - deiminase, ec:3.2.2.1 - nucleosidase, ec:1.17.3.2 - oxidase, ec:2.7.4.3 - kinase, ec:3.5.2.17…
TR60489|c0_g1_i2	Glycerophospholipid metabolism	map00564	33	ec:3.1.4.4 - D, ec:3.1.1.52 - deacylase, ec:2.3.1.51 - O-acyltransferase, ec:2.7.8.5 - 1-phosphatidyltransferase, ec:2.1.1.17 - N-methyltransferase, ec:1.1.1.8 - dehydrogenase (NAD+), ec:2.7.8.1 - EPT, ec:2.1.1.103 - N-methyltransferase, ec:2.7.1.107 - kinase (ATP), ec:3.1.1.32 - A1, ec:3.6.1.16 - diphosphatase, ec:2.7.1.32 - kinase, ec:3.1.3.75 - phosphatase, ec:1.1.1.94 - dehydrogenase [NAD(P)+…
Mj_1_GCCAAT_L005_R1_001_(paired)_trimmed_(paired)_contig_6877	Steroid biosynthesis	map00100	10	ec:1.1.1.170 - 3-dehydrogenase (decarboxylating), ec:5.4.99.8 - synthase, ec:5.3.3.5 - Delta-isomerase, ec:1.3.1.72 - reductase, ec:2.5.1.21 - synthase, ec:2.1.1.143 - C-methyltransferase, ec:1.3.1.21 - reductase, ec:2.1.1.41 - 24-C-methyltransferase, ec:5.5.1.9 - cycloisomerase, ec:1.3.1.70 - reductase
TR79055|c2_g2_i6	alpha-Linolenic acid metabolism, Retinol metabolism, Flavonoid biosynthesis, Chloroalkane and chloroalkene degradation, Glycine, serine and threonine metabolism, Fatty acid degradation, Tyrosine metabolism, Metabolism of xenobiotics by cytochrome P450, Naphthalene degradation, Drug metabolism - cytochrome P450, Glycolysis / Gluconeogenesis	map00592, map00830, map00941, map00625, map00260, map00071, map00350, map00980, map00626, map00982, map00010	11, 6, 10, 5, 39, 14, 26, 8, 2, 7, 28	ec:4.2.1.92 - dehydratase, ec:1.3.3.6 - oxidase, ec:2.3.1.16 - C-acyltransferase, ec:3.1.1.32 - A1, ec:1.3.1.42 - reductase, ec:1.1.1.1 - dehydrogenase, ec:1.13.11.12 - 13S-lipoxygenase, ec:5.3.99.6 - cyclase, ec:4.2.1.17 - hydratase, ec:2.1.1.141 - O-methyltransferase, ec:3.1.1.4 - A2, ec:1.2.1.36 - dehydrogenase, ec:1.14.14.1 - monooxygenase, ec:1.1.1.1 - dehydrogenase, ec:1.2.3.1 - oxidase, ec…
TR79055|c2_g2_i5	alpha-Linolenic acid metabolism, Retinol metabolism, Flavonoid biosynthesis, Chloroalkane and chloroalkene degradation, Glycine, serine and threonine metabolism, Fatty acid degradation, Tyrosine metabolism, Metabolism of xenobiotics by cytochrome P450, Naphthalene degradation, Drug metabolism - cytochrome P450, Glycolysis / Gluconeogenesis	map00592, map00830, map00941, map00625, map00260, map00071, map00350, map00980, map00626, map00982, map00010	11, 6, 10, 5, 39, 14, 26, 8, 2, 7, 28	ec:4.2.1.92 - dehydratase, ec:1.3.3.6 - oxidase, ec:2.3.1.16 - C-acyltransferase, ec:3.1.1.32 - A1, ec:1.3.1.42 - reductase, ec:1.1.1.1 - dehydrogenase, ec:1.13.11.12 - 13S-lipoxygenase, ec:5.3.99.6 - cyclase, ec:4.2.1.17 - hydratase, ec:2.1.1.141 - O-methyltransferase, ec:3.1.1.4 - A2, ec:1.2.1.36 - dehydrogenase, ec:1.14.14.1 - monooxygenase, ec:1.1.1.1 - dehydrogenase, ec:1.2.3.1 - oxidase, ec…
TR57272|c0_g1_i5	Thiamine metabolism, Riboflavin metabolism	map00730, map00740	12, 12	ec:3.6.1.15 - phosphatase, ec:2.7.4.7 - kinase, ec:2.8.1.7 - desulfurase, ec:2.7.6.2 - diphosphokinase, ec:2.7.1.50 - kinase, ec:2.7.4.3 - kinase, ec:2.7.1.49 - kinase, ec:3.5.99.2 - aminohydrolase, ec:2.5.1.3 - phosphate synthase, ec:3.1.3.2 - phosphatase, ec:4.1.99.19 - synthase, ec:2.2.1.7 - synthase, ec:3.6.1.9 - diphosphatase, ec:3.5.4.25 - cyclohydrolase II, ec:2.7.7.2 - synthase, ec:1.5.1.…
TR79055|c2_g2_i8	alpha-Linolenic acid metabolism, Retinol metabolism, Flavonoid biosynthesis, Chloroalkane and chloroalkene degradation, Glycine, serine and threonine metabolism, Fatty acid degradation, Tyrosine metabolism, Metabolism of xenobiotics by cytochrome P450, Naphthalene degradation, Drug metabolism - cytochrome P450, Glycolysis / Gluconeogenesis	map00592, map00830, map00941, map00625, map00260, map00071, map00350, map00980, map00626, map00982, map00010	11, 6, 10, 5, 39, 14, 26, 8, 2, 7, 28	ec:4.2.1.92 - dehydratase, ec:1.3.3.6 - oxidase, ec:2.3.1.16 - C-acyltransferase, ec:3.1.1.32 - A1, ec:1.3.1.42 - reductase, ec:1.1.1.1 - dehydrogenase, ec:1.13.11.12 - 13S-lipoxygenase, ec:5.3.99.6 - cyclase, ec:4.2.1.17 - hydratase, ec:2.1.1.141 - O-methyltransferase, ec:3.1.1.4 - A2, ec:1.2.1.36 - dehydrogenase, ec:1.14.14.1 - monooxygenase, ec:1.1.1.1 - dehydrogenase, ec:1.2.3.1 - oxidase, ec…
TR77217|c0_g2_i1	Purine metabolism	map00230	60	ec:3.6.1.15 - phosphatase, ec:4.6.1.2 - cyclase, ec:3.2.2.7 - nucleosidase, ec:3.6.1.9 - diphosphatase, ec:1.17.4.1 - reductase, ec:2.7.4.10 - kinase, ec:6.3.3.1 - cyclo-ligase, ec:1.7.3.3 - urate hydroxylase, ec:3.1.3.5 - uridine 5'-nucleotidase, ec:2.7.1.74 - kinase, ec:6.3.2.6 - synthase, ec:3.5.3.9 - deiminase, ec:3.2.2.1 - nucleosidase, ec:1.17.3.2 - oxidase, ec:2.7.4.3 - kinase, ec:3.5.2.17…
TR79055|c2_g2_i4	alpha-Linolenic acid metabolism, Retinol metabolism, Flavonoid biosynthesis, Chloroalkane and chloroalkene degradation, Glycine, serine and threonine metabolism, Fatty acid degradation, Tyrosine metabolism, Metabolism of xenobiotics by cytochrome P450, Naphthalene degradation, Drug metabolism - cytochrome P450, Glycolysis / Gluconeogenesis	map00592, map00830, map00941, map00625, map00260, map00071, map00350, map00980, map00626, map00982, map00010	11, 6, 10, 5, 39, 14, 26, 8, 2, 7, 28	ec:4.2.1.92 - dehydratase, ec:1.3.3.6 - oxidase, ec:2.3.1.16 - C-acyltransferase, ec:3.1.1.32 - A1, ec:1.3.1.42 - reductase, ec:1.1.1.1 - dehydrogenase, ec:1.13.11.12 - 13S-lipoxygenase, ec:5.3.99.6 - cyclase, ec:4.2.1.17 - hydratase, ec:2.1.1.141 - O-methyltransferase, ec:3.1.1.4 - A2, ec:1.2.1.36 - dehydrogenase, ec:1.14.14.1 - monooxygenase, ec:1.1.1.1 - dehydrogenase, ec:1.2.3.1 - oxidase, ec…
TR79055|c2_g2_i3	alpha-Linolenic acid metabolism, Retinol metabolism, Flavonoid biosynthesis, Chloroalkane and chloroalkene degradation, Glycine, serine and threonine metabolism, Fatty acid degradation, Tyrosine metabolism, Metabolism of xenobiotics by cytochrome P450, Naphthalene degradation, Drug metabolism - cytochrome P450, Glycolysis / Gluconeogenesis	map00592, map00830, map00941, map00625, map00260, map00071, map00350, map00980, map00626, map00982, map00010	11, 6, 10, 5, 39, 14, 26, 8, 2, 7, 28	ec:4.2.1.92 - dehydratase, ec:1.3.3.6 - oxidase, ec:2.3.1.16 - C-acyltransferase, ec:3.1.1.32 - A1, ec:1.3.1.42 - reductase, ec:1.1.1.1 - dehydrogenase, ec:1.13.11.12 - 13S-lipoxygenase, ec:5.3.99.6 - cyclase, ec:4.2.1.17 - hydratase, ec:2.1.1.141 - O-methyltransferase, ec:3.1.1.4 - A2, ec:1.2.1.36 - dehydrogenase, ec:1.14.14.1 - monooxygenase, ec:1.1.1.1 - dehydrogenase, ec:1.2.3.1 - oxidase, ec…
TR29469|c0_g1_i1	Isoquinoline alkaloid biosynthesis	map00950	17	ec:2.6.1.57 - transaminase, ec:2.1.1.128 - 6-O-methyltransferase, ec:2.6.1.5 - transaminase, ec:4.1.1.28 - decarboxylase, ec:1.1.1.247 - reductase (NADPH), ec:2.6.1.1 - transaminase, ec:2.1.1.116 - 4'-O-methyltransferase, ec:4.1.1.25 - decarboxylase, ec:1.4.3.2 - oxidase, ec:1.14.18.1 - monophenol monooxygenase, ec:1.21.3.3 - oxidase, ec:2.3.1.150 - 7-O-acetyltransferase, ec:1.1.1.248 - reductase…
TR76774|c0_g7_i2	Vitamin B6 metabolism	map00750	8	ec:1.4.3.5 - 5'-phosphate synthase, ec:4.2.3.1 - synthase, ec:1.1.1.65 - 4-dehydrogenase, ec:1.2.3.1 - oxidase, ec:1.1.1.107 - 4-dehydrogenase, ec:2.7.1.35 - kinase, ec:4.3.3.6 - 5'-phosphate synthase (glutamine hydrolysing), ec:2.6.1.52 - transaminase
TR51902|c3_g1_i1	Pentose and glucuronate interconversions	map00040	20	ec:2.7.1.17 - xylulokinase (phosphorylating), ec:5.1.3.1 - 3-epimerase, ec:5.3.1.5 - isomerase, ec:2.7.7.9 - uridylyltransferase, ec:1.1.1.21 - reductase, ec:3.2.1.31 - beta-glucuronide glucuronohydrolase glucuronidase, ec:1.1.1.12 - 4-dehydrogenase, ec:2.7.7.44 - uridylyltransferase, ec:1.1.1.22 - 6-dehydrogenase, ec:1.1.1.9 - reductase, ec:3.1.1.11 - pectin demethoxylase, ec:3.2.1.15 - pectin d…
Mj_1_GCCAAT_L005_R1_001_(paired)_trimmed_(paired)_contig_92902	Nitrogen metabolism	map00910	18	ec:3.5.1.49 - ec:3.5.1.49 formamidase, ec:1.4.1.14 - synthase (NADH), ec:1.7.7.1 - reductase, ec:3.5.5.1 - acetonitrilase, ec:4.2.1.1 - anhydrase, ec:1.4.1.2 - dehydrogenase, ec:4.2.1.104 - cyanate lyase, ec:6.3.1.2 - synthetase, ec:6.3.4.16 - synthase (ammonia), ec:1.7.7.2 - reductase, ec:1.4.1.3 - dehydrogenase [NAD(P)+], ec:1.4.7.1 - synthase (ferredoxin), ec:1.13.12.16 - monooxygenase, ec:1.7…
TR79541|c0_g1_i2	Purine metabolism	map00230	60	ec:3.6.1.15 - phosphatase, ec:4.6.1.2 - cyclase, ec:3.2.2.7 - nucleosidase, ec:3.6.1.9 - diphosphatase, ec:1.17.4.1 - reductase, ec:2.7.4.10 - kinase, ec:6.3.3.1 - cyclo-ligase, ec:1.7.3.3 - urate hydroxylase, ec:3.1.3.5 - uridine 5'-nucleotidase, ec:2.7.1.74 - kinase, ec:6.3.2.6 - synthase, ec:3.5.3.9 - deiminase, ec:3.2.2.1 - nucleosidase, ec:1.17.3.2 - oxidase, ec:2.7.4.3 - kinase, ec:3.5.2.17…
TR58766|c0_g1_i1	Pyruvate metabolism, Histidine metabolism, Chloroalkane and chloroalkene degradation, Ascorbate and aldarate metabolism, Lysine degradation, Fatty acid degradation, Tyrosine metabolism, Metabolism of xenobiotics by cytochrome P450, Arginine and proline metabolism, Limonene and pinene degradation, Tryptophan metabolism, Glycerolipid metabolism, Phenylalanine metabolism, beta-Alanine metabolism, Va…	map00620, map00340, map00625, map00053, map00310, map00071, map00350, map00980, map00330, map00903, map00380, map00561, map00360, map00410, map00280, map00982, map00010, map00981	33, 13, 5, 18, 12, 14, 26, 8, 28, 2, 29, 24, 22, 17, 21, 7, 28, 2	ec:4.1.1.32 - carboxykinase (GTP), ec:1.2.1.3 - dehydrogenase (NAD+), ec:1.1.1.79 - reductase (NADP+), ec:4.1.1.49 - carboxykinase (ATP), ec:2.3.1.12 - acetyltransferase, ec:1.1.2.3 - dehydrogenase (cytochrome), ec:1.1.1.37 - dehydrogenase, ec:1.1.1.28 - dehydrogenase, ec:3.1.2.1 - hydrolase, ec:2.7.9.1 - phosphate dikinase, ec:6.4.1.2 - carboxylase, ec:1.1.2.4 - dehydrogenase (cytochrome), ec:3.…
Mj_1_GCCAAT_L005_R1_001_(paired)_trimmed_(paired)_contig_6863	Steroid hormone biosynthesis, Linoleic acid metabolism, Retinol metabolism, Fatty acid degradation, Arachidonic acid metabolism, Caffeine metabolism, Metabolism of xenobiotics by cytochrome P450, Drug metabolism - cytochrome P450, Aminobenzoate degradation, Tryptophan metabolism	map00140, map00591, map00830, map00071, map00590, map00232, map00980, map00982, map00627, map00380	12, 3, 6, 14, 9, 3, 8, 7, 11, 29	ec:1.1.1.51 - 17)beta-hydroxysteroid dehydrogenase, ec:1.14.14.1 - monooxygenase, ec:1.3.1.3 - 5beta-reductase, ec:2.1.1.6 - O-methyltransferase, ec:1.1.1.145 - dehydrogenase, ec:1.1.1.62 - 17-dehydrogenase, ec:2.4.1.17 - 1-naphthol glucuronyltransferase, ec:1.1.1.53 - 20beta)-hydroxysteroid dehydrogenase, ec:1.1.1.149 - dehydrogenase, ec:1.3.1.22 - 4-dehydrogenase (NADP+), ec:1.1.1.146 - dehydro…
C852135	Cysteine and methionine metabolism	map00270	45	ec:1.13.11.53 - dioxygenase (Ni2+-requiring), ec:1.2.1.11 - dehydrogenase, ec:1.13.11.20 - dioxygenase, ec:4.4.1.14 - synthase, ec:2.6.1.57 - transaminase, ec:1.1.1.37 - dehydrogenase, ec:1.14.17.4 - oxidase, ec:2.6.1.5 - transaminase, ec:4.1.1.50 - decarboxylase, ec:2.1.1.13 - synthase, ec:2.5.1.49 - aminocarboxypropyltransferase, ec:2.3.1.30 - O-acetyltransferase, ec:2.1.1.5 - S-methyltransfera…
Mj_1_GCCAAT_L005_R1_001_(paired)_trimmed_(paired)_contig_5535	Photosynthesis	map00195	1	ec:1.18.1.2 - reductase
TR79541|c0_g1_i7	Purine metabolism	map00230	60	ec:3.6.1.15 - phosphatase, ec:4.6.1.2 - cyclase, ec:3.2.2.7 - nucleosidase, ec:3.6.1.9 - diphosphatase, ec:1.17.4.1 - reductase, ec:2.7.4.10 - kinase, ec:6.3.3.1 - cyclo-ligase, ec:1.7.3.3 - urate hydroxylase, ec:3.1.3.5 - uridine 5'-nucleotidase, ec:2.7.1.74 - kinase, ec:6.3.2.6 - synthase, ec:3.5.3.9 - deiminase, ec:3.2.2.1 - nucleosidase, ec:1.17.3.2 - oxidase, ec:2.7.4.3 - kinase, ec:3.5.2.17…
TR96109|c0_g1_i1	Carbon fixation in photosynthetic organisms, Pentose phosphate pathway, Fructose and mannose metabolism, Methane metabolism, Glycolysis / Gluconeogenesis	map00710, map00030, map00051, map00680, map00010	22, 21, 27, 23, 28	ec:5.1.3.1 - 3-epimerase, ec:4.1.1.49 - carboxykinase (ATP), ec:2.7.2.3 - kinase, ec:1.1.1.37 - dehydrogenase, ec:5.3.1.1 - isomerase, ec:2.7.9.1 - phosphate dikinase, ec:2.6.1.1 - transaminase, ec:1.2.1.12 - dehydrogenase (phosphorylating), ec:3.1.3.11 - hexose diphosphatase, ec:5.3.1.6 - isomerase, ec:2.2.1.1 - glycolaldehydetransferase, ec:4.1.2.13 - aldolase, ec:1.1.1.82 - dehydrogenase (NADP…
TR79868|c0_g1_i3	Phosphatidylinositol signaling system, Inositol phosphate metabolism	map04070, map00562	20, 25	ec:2.7.1.127 - 3-kinase, ec:2.7.1.158 - 2-kinase, ec:3.1.3.56 - 5-phosphatase, ec:2.7.1.107 - kinase (ATP), ec:2.7.1.137 - 3-kinase, ec:2.7.1.151 - multikinase, ec:3.1.4.11 - phospholipase C, ec:2.7.1.159 - 5/6-kinase, ec:3.1.3.36 - 5-phosphatase, ec:2.7.11.13 - kinase C, ec:3.1.3.57 - 1-phosphatase, ec:2.7.1.67 - 4-kinase, ec:2.7.8.11 - 3-phosphatidyltransferase, ec:2.7.7.41 - cytidylyltransfera…
TR29428|c0_g2_i1	Glycerolipid metabolism, Glycerophospholipid metabolism	map00561, map00564	24, 33	ec:2.3.1.20 - O-acyltransferase, ec:1.2.1.3 - dehydrogenase (NAD+), ec:2.7.1.31 - 3-kinase, ec:2.3.1.51 - O-acyltransferase, ec:2.7.7.9 - uridylyltransferase, ec:1.1.1.21 - reductase, ec:2.4.1.46 - synthase, ec:3.2.1.22 - melibiase, ec:2.7.1.107 - kinase (ATP), ec:3.1.1.23 - lipase, ec:2.3.1.22 - O-acyltransferase, ec:2.4.1.241 - synthase, ec:3.13.1.1 - synthase, ec:2.4.1.184 - galactosyltransfer…
TR79868|c0_g1_i1	Phosphatidylinositol signaling system, Inositol phosphate metabolism	map04070, map00562	20, 25	ec:2.7.1.127 - 3-kinase, ec:2.7.1.158 - 2-kinase, ec:3.1.3.56 - 5-phosphatase, ec:2.7.1.107 - kinase (ATP), ec:2.7.1.137 - 3-kinase, ec:2.7.1.151 - multikinase, ec:3.1.4.11 - phospholipase C, ec:2.7.1.159 - 5/6-kinase, ec:3.1.3.36 - 5-phosphatase, ec:2.7.11.13 - kinase C, ec:3.1.3.57 - 1-phosphatase, ec:2.7.1.67 - 4-kinase, ec:2.7.8.11 - 3-phosphatidyltransferase, ec:2.7.7.41 - cytidylyltransfera…
TR76577|c0_g1_i1	Glycine, serine and threonine metabolism, Penicillin and cephalosporin biosynthesis, Cysteine and methionine metabolism, Selenocompound metabolism	map00260, map00311, map00270, map00450	39, 2, 45, 10	ec:2.3.1.37 - synthase, ec:2.7.1.31 - 3-kinase, ec:1.2.1.11 - dehydrogenase, ec:4.3.1.18 - ammonia-lyase, ec:4.1.2.5 - aldolase, ec:2.7.1.39 - kinase, ec:2.1.2.1 - hydroxymethyltransferase, ec:1.1.1.81 - reductase, ec:2.1.1.5 - S-methyltransferase, ec:2.6.1.45 - transaminase, ec:1.5.3.10 - oxidase, ec:2.1.2.10 - S-aminomethyldihydrolipoylprotein:(6S)-tetrahydrofolate aminomethyltransferase (ammon…
TR93523|c0_g1_i1	Carbon fixation in photosynthetic organisms, Pyruvate metabolism, Glyoxylate and dicarboxylate metabolism, Cysteine and methionine metabolism, Methane metabolism, Carbon fixation pathways in prokaryotes, Citrate cycle (TCA cycle)	map00710, map00620, map00630, map00270, map00680, map00720, map00020	22, 33, 34, 45, 23, 21, 18	ec:5.1.3.1 - 3-epimerase, ec:4.1.1.49 - carboxykinase (ATP), ec:2.7.2.3 - kinase, ec:1.1.1.37 - dehydrogenase, ec:5.3.1.1 - isomerase, ec:2.7.9.1 - phosphate dikinase, ec:2.6.1.1 - transaminase, ec:1.2.1.12 - dehydrogenase (phosphorylating), ec:3.1.3.11 - hexose diphosphatase, ec:5.3.1.6 - isomerase, ec:2.2.1.1 - glycolaldehydetransferase, ec:4.1.2.13 - aldolase, ec:1.1.1.82 - dehydrogenase (NADP…
C839170	Pyruvate metabolism, Histidine metabolism, Phenylalanine metabolism, Tyrosine metabolism, Metabolism of xenobiotics by cytochrome P450, beta-Alanine metabolism, Drug metabolism - cytochrome P450, Glycolysis / Gluconeogenesis	map00620, map00340, map00360, map00350, map00980, map00410, map00982, map00010	33, 13, 22, 26, 8, 17, 7, 28	ec:4.1.1.32 - carboxykinase (GTP), ec:1.2.1.3 - dehydrogenase (NAD+), ec:1.1.1.79 - reductase (NADP+), ec:4.1.1.49 - carboxykinase (ATP), ec:2.3.1.12 - acetyltransferase, ec:1.1.2.3 - dehydrogenase (cytochrome), ec:1.1.1.37 - dehydrogenase, ec:1.1.1.28 - dehydrogenase, ec:3.1.2.1 - hydrolase, ec:2.7.9.1 - phosphate dikinase, ec:6.4.1.2 - carboxylase, ec:1.1.2.4 - dehydrogenase (cytochrome), ec:3.…
TR76577|c0_g1_i3	Glycine, serine and threonine metabolism, Penicillin and cephalosporin biosynthesis, Cysteine and methionine metabolism, Selenocompound metabolism	map00260, map00311, map00270, map00450	39, 2, 45, 10	ec:2.3.1.37 - synthase, ec:2.7.1.31 - 3-kinase, ec:1.2.1.11 - dehydrogenase, ec:4.3.1.18 - ammonia-lyase, ec:4.1.2.5 - aldolase, ec:2.7.1.39 - kinase, ec:2.1.2.1 - hydroxymethyltransferase, ec:1.1.1.81 - reductase, ec:2.1.1.5 - S-methyltransferase, ec:2.6.1.45 - transaminase, ec:1.5.3.10 - oxidase, ec:2.1.2.10 - S-aminomethyldihydrolipoylprotein:(6S)-tetrahydrofolate aminomethyltransferase (ammon…
TR8714|c0_g2_i1	Carbon fixation pathways in prokaryotes	map00720	21	ec:1.5.1.5 - dehydrogenase (NADP+), ec:1.1.1.37 - dehydrogenase, ec:1.1.1.42 - dehydrogenase (NADP+), ec:1.3.5.1 - dehydrogenase, ec:2.7.9.1 - phosphate dikinase, ec:6.4.1.2 - carboxylase, ec:1.5.1.20 - reductase [NAD(P)H], ec:3.5.4.9 - cyclohydrolase, ec:4.2.1.3 - hydratase, ec:4.2.1.2 - hydratase, ec:1.1.1.35 - dehydrogenase, ec:6.2.1.1 - ligase, ec:6.4.1.3 - carboxylase, ec:4.1.1.31 - carboxyl…
Mj_1_GCCAAT_L005_R1_001_(paired)_trimmed_(paired)_contig_29595	Other glycan degradation	map00511	8	ec:3.2.1.23 - lactase (ambiguous), ec:3.5.1.26 - aspartylglucosylamine deaspartylase, ec:3.2.1.96 - endo-beta-N-acetylglucosaminidase, ec:3.2.1.24 - alpha-D-mannosidase, ec:3.2.1.45 - psychosine hydrolase, ec:3.2.1.51 - alpha-fucosidase, ec:3.2.1.25 - mannanase, ec:3.2.1.52 - hexosaminidase
TR79868|c0_g1_i4	Phosphatidylinositol signaling system, Inositol phosphate metabolism	map04070, map00562	20, 25	ec:2.7.1.127 - 3-kinase, ec:2.7.1.158 - 2-kinase, ec:3.1.3.56 - 5-phosphatase, ec:2.7.1.107 - kinase (ATP), ec:2.7.1.137 - 3-kinase, ec:2.7.1.151 - multikinase, ec:3.1.4.11 - phospholipase C, ec:2.7.1.159 - 5/6-kinase, ec:3.1.3.36 - 5-phosphatase, ec:2.7.11.13 - kinase C, ec:3.1.3.57 - 1-phosphatase, ec:2.7.1.67 - 4-kinase, ec:2.7.8.11 - 3-phosphatidyltransferase, ec:2.7.7.41 - cytidylyltransfera…
Mj_1_GCCAAT_L005_R1_001_(paired)_trimmed_(paired)_contig_6899	alpha-Linolenic acid metabolism, Linoleic acid metabolism	map00592, map00591	11, 3	ec:4.2.1.92 - dehydratase, ec:1.3.3.6 - oxidase, ec:2.3.1.16 - C-acyltransferase, ec:3.1.1.32 - A1, ec:1.3.1.42 - reductase, ec:1.1.1.1 - dehydrogenase, ec:1.13.11.12 - 13S-lipoxygenase, ec:5.3.99.6 - cyclase, ec:4.2.1.17 - hydratase, ec:2.1.1.141 - O-methyltransferase, ec:3.1.1.4 - A2, ec:1.14.14.1 - monooxygenase, ec:1.13.11.12 - 13S-lipoxygenase, ec:3.1.1.4 - A2
TR79236|c1_g1_i9	Monobactam biosynthesis, Lysine biosynthesis	map00261, map00300	5, 12	ec:1.2.1.11 - dehydrogenase, ec:2.7.2.4 - kinase, ec:2.7.7.4 - adenylyltransferase, ec:1.17.1.8 - reductase, ec:4.3.3.7 - synthase, ec:1.5.1.10 - dehydrogenase (NADP+, L-glutamate-forming), ec:1.2.1.11 - dehydrogenase, ec:2.6.1.57 - transaminase, ec:4.1.1.20 - decarboxylase, ec:5.1.1.7 - epimerase, ec:2.7.2.4 - kinase, ec:6.3.2.13 - ligase, ec:1.17.1.8 - reductase, ec:2.3.3.14 - synthase, ec:4.3.…
Mj_1_GCCAAT_L005_R1_001_(paired)_trimmed_(paired)_contig_5563	Phenylalanine metabolism, Tyrosine metabolism, Ubiquinone and other terpenoid-quinone biosynthesis	map00360, map00350, map00130	22, 26, 14	ec:5.3.2.1 - tautomerase, ec:1.1.1.237 - reductase, ec:2.6.1.57 - transaminase, ec:1.13.11.27 - dioxygenase, ec:1.1.1.90 - dehydrogenase, ec:2.6.1.5 - transaminase, ec:4.1.1.28 - decarboxylase, ec:2.6.1.1 - transaminase, ec:2.6.1.9 - transaminase, ec:1.4.3.2 - oxidase, ec:2.6.1.58 - transaminase, ec:1.1.1.157 - dehydrogenase, ec:4.3.1.24 - ammonia-lyase, ec:3.5.1.4 - acylamidase, ec:2.6.1.21 - tr…
TR68827|c0_g2_i2	Phosphatidylinositol signaling system, Glycerolipid metabolism, Glycerophospholipid metabolism, Nicotinate and nicotinamide metabolism, Sphingolipid metabolism	map04070, map00561, map00564, map00760, map00600	20, 24, 33, 17, 14	ec:2.7.1.127 - 3-kinase, ec:2.7.1.158 - 2-kinase, ec:3.1.3.56 - 5-phosphatase, ec:2.7.1.107 - kinase (ATP), ec:2.7.1.137 - 3-kinase, ec:2.7.1.151 - multikinase, ec:3.1.4.11 - phospholipase C, ec:2.7.1.159 - 5/6-kinase, ec:3.1.3.36 - 5-phosphatase, ec:2.7.11.13 - kinase C, ec:3.1.3.57 - 1-phosphatase, ec:2.7.1.67 - 4-kinase, ec:2.7.8.11 - 3-phosphatidyltransferase, ec:2.7.7.41 - cytidylyltransfera…
TR74364|c0_g1_i8	Thiamine metabolism, Riboflavin metabolism	map00730, map00740	12, 12	ec:3.6.1.15 - phosphatase, ec:2.7.4.7 - kinase, ec:2.8.1.7 - desulfurase, ec:2.7.6.2 - diphosphokinase, ec:2.7.1.50 - kinase, ec:2.7.4.3 - kinase, ec:2.7.1.49 - kinase, ec:3.5.99.2 - aminohydrolase, ec:2.5.1.3 - phosphate synthase, ec:3.1.3.2 - phosphatase, ec:4.1.99.19 - synthase, ec:2.2.1.7 - synthase, ec:3.6.1.9 - diphosphatase, ec:3.5.4.25 - cyclohydrolase II, ec:2.7.7.2 - synthase, ec:1.5.1.…
TR62642|c0_g2_i2	Folate biosynthesis, Arachidonic acid metabolism, Metabolism of xenobiotics by cytochrome P450	map00790, map00590, map00980	17, 9, 8	ec:3.4.19.9 - gamma-glutamyl hydrolase, ec:2.5.1.15 - synthase, ec:1.1.1.21 - reductase, ec:6.3.2.12 - synthase, ec:2.10.1.1 - molybdotransferase, ec:4.2.1.96 - dehydratase, ec:3.5.4.25 - cyclohydrolase II, ec:3.5.4.16 - cyclohydrolase I, ec:6.3.2.17 - synthase, ec:2.7.6.3 - diphosphokinase, ec:2.6.1.85 - synthase, ec:1.1.1.184 - reductase (NADPH), ec:2.7.7.75 - adenylyltransferase, ec:4.1.2.25 -…
TR62642|c0_g2_i1	Folate biosynthesis, Arachidonic acid metabolism, Metabolism of xenobiotics by cytochrome P450	map00790, map00590, map00980	17, 9, 8	ec:3.4.19.9 - gamma-glutamyl hydrolase, ec:2.5.1.15 - synthase, ec:1.1.1.21 - reductase, ec:6.3.2.12 - synthase, ec:2.10.1.1 - molybdotransferase, ec:4.2.1.96 - dehydratase, ec:3.5.4.25 - cyclohydrolase II, ec:3.5.4.16 - cyclohydrolase I, ec:6.3.2.17 - synthase, ec:2.7.6.3 - diphosphokinase, ec:2.6.1.85 - synthase, ec:1.1.1.184 - reductase (NADPH), ec:2.7.7.75 - adenylyltransferase, ec:4.1.2.25 -…
TR78482|c1_g7_i1	Phenylpropanoid biosynthesis	map00940	17	ec:3.2.1.126 - beta-glucosidase, ec:1.1.1.195 - dehydrogenase, ec:1.11.1.7 - lactoperoxidase, ec:2.1.1.146 - O-methyltransferase, ec:1.2.1.68 - dehydrogenase, ec:4.3.1.24 - ammonia-lyase, ec:2.1.1.104 - O-methyltransferase, ec:2.4.1.111 - glucosyltransferase, ec:2.4.1.128 - glucosyltransferase, ec:2.3.1.92 - O-sinapoyltransferase, ec:1.2.1.44 - reductase, ec:2.3.1.99 - O-hydroxycinnamoyltransfera…
TR68827|c0_g2_i4	Phosphatidylinositol signaling system, Glycerolipid metabolism, Glycerophospholipid metabolism, Nicotinate and nicotinamide metabolism	map04070, map00561, map00564, map00760	20, 24, 33, 17	ec:2.7.1.127 - 3-kinase, ec:2.7.1.158 - 2-kinase, ec:3.1.3.56 - 5-phosphatase, ec:2.7.1.107 - kinase (ATP), ec:2.7.1.137 - 3-kinase, ec:2.7.1.151 - multikinase, ec:3.1.4.11 - phospholipase C, ec:2.7.1.159 - 5/6-kinase, ec:3.1.3.36 - 5-phosphatase, ec:2.7.11.13 - kinase C, ec:3.1.3.57 - 1-phosphatase, ec:2.7.1.67 - 4-kinase, ec:2.7.8.11 - 3-phosphatidyltransferase, ec:2.7.7.41 - cytidylyltransfera…
C913681	Glyoxylate and dicarboxylate metabolism, Tryptophan metabolism	map00630, map00380	34, 29	ec:3.5.1.9 - kynurenine formamidase, ec:4.1.3.1 - lyase, ec:1.1.1.79 - reductase (NADP+), ec:2.7.1.31 - 3-kinase, ec:3.5.1.49 - ec:3.5.1.49 formamidase, ec:4.1.1.2 - decarboxylase, ec:1.1.1.60 - reductase, ec:3.1.3.18 - phosphatase, ec:1.1.1.37 - dehydrogenase, ec:1.1.99.14 - dehydrogenase, ec:2.1.2.1 - hydroxymethyltransferase, ec:1.1.1.81 - reductase, ec:6.3.1.2 - synthetase, ec:2.6.1.45 - tran…
TR74364|c0_g1_i1	Thiamine metabolism, Riboflavin metabolism	map00730, map00740	12, 12	ec:3.6.1.15 - phosphatase, ec:2.7.4.7 - kinase, ec:2.8.1.7 - desulfurase, ec:2.7.6.2 - diphosphokinase, ec:2.7.1.50 - kinase, ec:2.7.4.3 - kinase, ec:2.7.1.49 - kinase, ec:3.5.99.2 - aminohydrolase, ec:2.5.1.3 - phosphate synthase, ec:3.1.3.2 - phosphatase, ec:4.1.99.19 - synthase, ec:2.2.1.7 - synthase, ec:3.6.1.9 - diphosphatase, ec:3.5.4.25 - cyclohydrolase II, ec:2.7.7.2 - synthase, ec:1.5.1.…
TR58223|c0_g1_i1	Purine metabolism	map00230	60	ec:3.6.1.15 - phosphatase, ec:4.6.1.2 - cyclase, ec:3.2.2.7 - nucleosidase, ec:3.6.1.9 - diphosphatase, ec:1.17.4.1 - reductase, ec:2.7.4.10 - kinase, ec:6.3.3.1 - cyclo-ligase, ec:1.7.3.3 - urate hydroxylase, ec:3.1.3.5 - uridine 5'-nucleotidase, ec:2.7.1.74 - kinase, ec:6.3.2.6 - synthase, ec:3.5.3.9 - deiminase, ec:3.2.2.1 - nucleosidase, ec:1.17.3.2 - oxidase, ec:2.7.4.3 - kinase, ec:3.5.2.17…
TR74364|c0_g1_i3	Thiamine metabolism, Riboflavin metabolism	map00730, map00740	12, 12	ec:3.6.1.15 - phosphatase, ec:2.7.4.7 - kinase, ec:2.8.1.7 - desulfurase, ec:2.7.6.2 - diphosphokinase, ec:2.7.1.50 - kinase, ec:2.7.4.3 - kinase, ec:2.7.1.49 - kinase, ec:3.5.99.2 - aminohydrolase, ec:2.5.1.3 - phosphate synthase, ec:3.1.3.2 - phosphatase, ec:4.1.99.19 - synthase, ec:2.2.1.7 - synthase, ec:3.6.1.9 - diphosphatase, ec:3.5.4.25 - cyclohydrolase II, ec:2.7.7.2 - synthase, ec:1.5.1.…
TR95863|c0_g1_i1	Folate biosynthesis, Arachidonic acid metabolism, Metabolism of xenobiotics by cytochrome P450	map00790, map00590, map00980	17, 9, 8	ec:3.4.19.9 - gamma-glutamyl hydrolase, ec:2.5.1.15 - synthase, ec:1.1.1.21 - reductase, ec:6.3.2.12 - synthase, ec:2.10.1.1 - molybdotransferase, ec:4.2.1.96 - dehydratase, ec:3.5.4.25 - cyclohydrolase II, ec:3.5.4.16 - cyclohydrolase I, ec:6.3.2.17 - synthase, ec:2.7.6.3 - diphosphokinase, ec:2.6.1.85 - synthase, ec:1.1.1.184 - reductase (NADPH), ec:2.7.7.75 - adenylyltransferase, ec:4.1.2.25 -…
C912349	T cell receptor signaling pathway, Th1 and Th2 cell differentiation, PD-L1 expression and PD-1 checkpoint pathway in cancer	map04660, map04658, map05235	2, 1, 1	ec:2.7.10.2 - protein-tyrosine kinase, ec:3.1.3.16 - phosphatase, ec:3.1.3.16 - phosphatase, ec:3.1.3.16 - phosphatase
Mj_1_GCCAAT_L005_R1_001_(paired)_trimmed_(paired)_contig_79927	Glycine, serine and threonine metabolism, One carbon pool by folate	map00260, map00670	39, 14	ec:2.3.1.37 - synthase, ec:2.7.1.31 - 3-kinase, ec:1.2.1.11 - dehydrogenase, ec:4.3.1.18 - ammonia-lyase, ec:4.1.2.5 - aldolase, ec:2.7.1.39 - kinase, ec:2.1.2.1 - hydroxymethyltransferase, ec:1.1.1.81 - reductase, ec:2.1.1.5 - S-methyltransferase, ec:2.6.1.45 - transaminase, ec:1.5.3.10 - oxidase, ec:2.1.2.10 - S-aminomethyldihydrolipoylprotein:(6S)-tetrahydrofolate aminomethyltransferase (ammon…
Mj_1_GCCAAT_L005_R1_001_(paired)_trimmed_(paired)_contig_4228	Cysteine and methionine metabolism, Tropane, piperidine and pyridine alkaloid biosynthesis, Glutathione metabolism, Arginine and proline metabolism	map00270, map00960, map00480, map00330	45, 11, 19, 28	ec:1.13.11.53 - dioxygenase (Ni2+-requiring), ec:1.2.1.11 - dehydrogenase, ec:1.13.11.20 - dioxygenase, ec:4.4.1.14 - synthase, ec:2.6.1.57 - transaminase, ec:1.1.1.37 - dehydrogenase, ec:1.14.17.4 - oxidase, ec:2.6.1.5 - transaminase, ec:4.1.1.50 - decarboxylase, ec:2.1.1.13 - synthase, ec:2.5.1.49 - aminocarboxypropyltransferase, ec:2.3.1.30 - O-acetyltransferase, ec:2.1.1.5 - S-methyltransfera…
TR60216|c0_g1_i5	Purine metabolism	map00230	60	ec:3.6.1.15 - phosphatase, ec:4.6.1.2 - cyclase, ec:3.2.2.7 - nucleosidase, ec:3.6.1.9 - diphosphatase, ec:1.17.4.1 - reductase, ec:2.7.4.10 - kinase, ec:6.3.3.1 - cyclo-ligase, ec:1.7.3.3 - urate hydroxylase, ec:3.1.3.5 - uridine 5'-nucleotidase, ec:2.7.1.74 - kinase, ec:6.3.2.6 - synthase, ec:3.5.3.9 - deiminase, ec:3.2.2.1 - nucleosidase, ec:1.17.3.2 - oxidase, ec:2.7.4.3 - kinase, ec:3.5.2.17…
Mj_1_GCCAAT_L005_R1_001_(paired)_trimmed_(paired)_contig_5552	Nitrogen metabolism, Glyoxylate and dicarboxylate metabolism	map00910, map00630	18, 34	ec:3.5.1.49 - ec:3.5.1.49 formamidase, ec:1.4.1.14 - synthase (NADH), ec:1.7.7.1 - reductase, ec:3.5.5.1 - acetonitrilase, ec:4.2.1.1 - anhydrase, ec:1.4.1.2 - dehydrogenase, ec:4.2.1.104 - cyanate lyase, ec:6.3.1.2 - synthetase, ec:6.3.4.16 - synthase (ammonia), ec:1.7.7.2 - reductase, ec:1.4.1.3 - dehydrogenase [NAD(P)+], ec:1.4.7.1 - synthase (ferredoxin), ec:1.13.12.16 - monooxygenase, ec:1.7…
Mj_1_GCCAAT_L005_R1_001_(paired)_trimmed_(paired)_contig_6882	Ubiquinone and other terpenoid-quinone biosynthesis, Phenylpropanoid biosynthesis	map00130, map00940	14, 17	ec:2.5.1.39 - polyprenyltransferase, ec:1.1.1.237 - reductase, ec:1.6.5.2 - dehydrogenase (quinone), ec:2.1.1.64 - 3-O-methyltransferase, ec:2.1.1.95 - C-methyltransferase, ec:4.1.3.36 - synthase, ec:1.13.11.27 - dioxygenase, ec:2.6.1.5 - transaminase, ec:4.2.99.20 - synthase, ec:6.2.1.26 - ligase, ec:2.2.1.9 - synthase, ec:2.1.1.114 - methyltransferase, ec:5.4.4.2 - synthase, ec:6.2.1.12 - ligas…
Mj_1_GCCAAT_L005_R1_001_(paired)_trimmed_(paired)_contig_41338	Phosphatidylinositol signaling system, Inositol phosphate metabolism	map04070, map00562	20, 25	ec:2.7.1.127 - 3-kinase, ec:2.7.1.158 - 2-kinase, ec:3.1.3.56 - 5-phosphatase, ec:2.7.1.107 - kinase (ATP), ec:2.7.1.137 - 3-kinase, ec:2.7.1.151 - multikinase, ec:3.1.4.11 - phospholipase C, ec:2.7.1.159 - 5/6-kinase, ec:3.1.3.36 - 5-phosphatase, ec:2.7.11.13 - kinase C, ec:3.1.3.57 - 1-phosphatase, ec:2.7.1.67 - 4-kinase, ec:2.7.8.11 - 3-phosphatidyltransferase, ec:2.7.7.41 - cytidylyltransfera…
Mj_1_GCCAAT_L005_R1_001_(paired)_trimmed_(paired)_contig_92934	Fluorobenzoate degradation, Benzoate degradation, Chlorocyclohexane and chlorobenzene degradation, Toluene degradation	map00364, map00362, map00361, map00623	4, 10, 5, 6	ec:4.2.1.84 - hydratase, ec:5.5.1.1 - cycloisomerase, ec:3.1.1.45 - maleylacetate enol-lactonase, ec:1.13.11.1 - 1,2-dioxygenase, ec:2.3.1.16 - C-acyltransferase, ec:5.5.1.1 - cycloisomerase, ec:1.1.1.157 - dehydrogenase, ec:5.5.1.5 - cyclase, ec:1.1.1.35 - dehydrogenase, ec:4.1.3.17 - aldolase, ec:1.13.11.1 - 1,2-dioxygenase, ec:4.1.1.44 - decarboxylase, ec:2.3.1.9 - C-acetyltransferase, ec:4.2.…
Mj_1_GCCAAT_L005_R1_001_(paired)_trimmed_(paired)_contig_107831	Carbon fixation in photosynthetic organisms, Fructose and mannose metabolism, Glycolysis / Gluconeogenesis, Inositol phosphate metabolism	map00710, map00051, map00010, map00562	22, 27, 28, 25	ec:5.1.3.1 - 3-epimerase, ec:4.1.1.49 - carboxykinase (ATP), ec:2.7.2.3 - kinase, ec:1.1.1.37 - dehydrogenase, ec:5.3.1.1 - isomerase, ec:2.7.9.1 - phosphate dikinase, ec:2.6.1.1 - transaminase, ec:1.2.1.12 - dehydrogenase (phosphorylating), ec:3.1.3.11 - hexose diphosphatase, ec:5.3.1.6 - isomerase, ec:2.2.1.1 - glycolaldehydetransferase, ec:4.1.2.13 - aldolase, ec:1.1.1.82 - dehydrogenase (NADP…
C757615	Carbon fixation in photosynthetic organisms, Biosynthesis of ansamycins, Pentose phosphate pathway	map00710, map01051, map00030	22, 1, 21	ec:5.1.3.1 - 3-epimerase, ec:4.1.1.49 - carboxykinase (ATP), ec:2.7.2.3 - kinase, ec:1.1.1.37 - dehydrogenase, ec:5.3.1.1 - isomerase, ec:2.7.9.1 - phosphate dikinase, ec:2.6.1.1 - transaminase, ec:1.2.1.12 - dehydrogenase (phosphorylating), ec:3.1.3.11 - hexose diphosphatase, ec:5.3.1.6 - isomerase, ec:2.2.1.1 - glycolaldehydetransferase, ec:4.1.2.13 - aldolase, ec:1.1.1.82 - dehydrogenase (NADP…
Mj_1_GCCAAT_L005_R1_001_(paired)_trimmed_(paired)_contig_16266	Drug metabolism - cytochrome P450	map00982	7	ec:1.14.14.1 - monooxygenase, ec:1.1.1.1 - dehydrogenase, ec:1.2.1.5 - dehydrogenase [NAD(P)+], ec:1.2.3.1 - oxidase, ec:2.4.1.17 - 1-naphthol glucuronyltransferase, ec:1.14.13.8 - monooxygenase, ec:2.5.1.18 - transferase
TR72205|c1_g1_i7	Purine metabolism	map00230	60	ec:3.6.1.15 - phosphatase, ec:4.6.1.2 - cyclase, ec:3.2.2.7 - nucleosidase, ec:3.6.1.9 - diphosphatase, ec:1.17.4.1 - reductase, ec:2.7.4.10 - kinase, ec:6.3.3.1 - cyclo-ligase, ec:1.7.3.3 - urate hydroxylase, ec:3.1.3.5 - uridine 5'-nucleotidase, ec:2.7.1.74 - kinase, ec:6.3.2.6 - synthase, ec:3.5.3.9 - deiminase, ec:3.2.2.1 - nucleosidase, ec:1.17.3.2 - oxidase, ec:2.7.4.3 - kinase, ec:3.5.2.17…
TR77384|c1_g2_i1	Glycerolipid metabolism	map00561	24	ec:2.3.1.20 - O-acyltransferase, ec:1.2.1.3 - dehydrogenase (NAD+), ec:2.7.1.31 - 3-kinase, ec:2.3.1.51 - O-acyltransferase, ec:2.7.7.9 - uridylyltransferase, ec:1.1.1.21 - reductase, ec:2.4.1.46 - synthase, ec:3.2.1.22 - melibiase, ec:2.7.1.107 - kinase (ATP), ec:3.1.1.23 - lipase, ec:2.3.1.22 - O-acyltransferase, ec:2.4.1.241 - synthase, ec:3.13.1.1 - synthase, ec:2.4.1.184 - galactosyltransfer…
Mj_1_GCCAAT_L005_R1_001_(paired)_trimmed_(paired)_contig_17594	Thiamine metabolism, Purine metabolism	map00730, map00230	12, 60	ec:3.6.1.15 - phosphatase, ec:2.7.4.7 - kinase, ec:2.8.1.7 - desulfurase, ec:2.7.6.2 - diphosphokinase, ec:2.7.1.50 - kinase, ec:2.7.4.3 - kinase, ec:2.7.1.49 - kinase, ec:3.5.99.2 - aminohydrolase, ec:2.5.1.3 - phosphate synthase, ec:3.1.3.2 - phosphatase, ec:4.1.99.19 - synthase, ec:2.2.1.7 - synthase, ec:3.6.1.15 - phosphatase, ec:4.6.1.2 - cyclase, ec:3.2.2.7 - nucleosidase, ec:3.6.1.9 - diph…
TR72205|c1_g1_i9	Purine metabolism	map00230	60	ec:3.6.1.15 - phosphatase, ec:4.6.1.2 - cyclase, ec:3.2.2.7 - nucleosidase, ec:3.6.1.9 - diphosphatase, ec:1.17.4.1 - reductase, ec:2.7.4.10 - kinase, ec:6.3.3.1 - cyclo-ligase, ec:1.7.3.3 - urate hydroxylase, ec:3.1.3.5 - uridine 5'-nucleotidase, ec:2.7.1.74 - kinase, ec:6.3.2.6 - synthase, ec:3.5.3.9 - deiminase, ec:3.2.2.1 - nucleosidase, ec:1.17.3.2 - oxidase, ec:2.7.4.3 - kinase, ec:3.5.2.17…
Mj_1_GCCAAT_L005_R1_001_(paired)_trimmed_(paired)_contig_91609	Oxidative phosphorylation	map00190	3	ec:3.6.1.1 - diphosphatase, ec:1.3.5.1 - dehydrogenase, ec:1.6.99.3 - dehydrogenase
Mj_1_GCCAAT_L005_R1_001_(paired)_trimmed_(paired)_contig_91608	Oxidative phosphorylation	map00190	3	ec:3.6.1.1 - diphosphatase, ec:1.3.5.1 - dehydrogenase, ec:1.6.99.3 - dehydrogenase
TR77384|c1_g2_i5	Glycerolipid metabolism	map00561	24	ec:2.3.1.20 - O-acyltransferase, ec:1.2.1.3 - dehydrogenase (NAD+), ec:2.7.1.31 - 3-kinase, ec:2.3.1.51 - O-acyltransferase, ec:2.7.7.9 - uridylyltransferase, ec:1.1.1.21 - reductase, ec:2.4.1.46 - synthase, ec:3.2.1.22 - melibiase, ec:2.7.1.107 - kinase (ATP), ec:3.1.1.23 - lipase, ec:2.3.1.22 - O-acyltransferase, ec:2.4.1.241 - synthase, ec:3.13.1.1 - synthase, ec:2.4.1.184 - galactosyltransfer…
TR77384|c1_g2_i4	Glycerolipid metabolism	map00561	24	ec:2.3.1.20 - O-acyltransferase, ec:1.2.1.3 - dehydrogenase (NAD+), ec:2.7.1.31 - 3-kinase, ec:2.3.1.51 - O-acyltransferase, ec:2.7.7.9 - uridylyltransferase, ec:1.1.1.21 - reductase, ec:2.4.1.46 - synthase, ec:3.2.1.22 - melibiase, ec:2.7.1.107 - kinase (ATP), ec:3.1.1.23 - lipase, ec:2.3.1.22 - O-acyltransferase, ec:2.4.1.241 - synthase, ec:3.13.1.1 - synthase, ec:2.4.1.184 - galactosyltransfer…
TR72784|c0_g1_i3	Glycine, serine and threonine metabolism, Cysteine and methionine metabolism, Monobactam biosynthesis, Lysine biosynthesis	map00260, map00270, map00261, map00300	39, 45, 5, 12	ec:2.3.1.37 - synthase, ec:2.7.1.31 - 3-kinase, ec:1.2.1.11 - dehydrogenase, ec:4.3.1.18 - ammonia-lyase, ec:4.1.2.5 - aldolase, ec:2.7.1.39 - kinase, ec:2.1.2.1 - hydroxymethyltransferase, ec:1.1.1.81 - reductase, ec:2.1.1.5 - S-methyltransferase, ec:2.6.1.45 - transaminase, ec:1.5.3.10 - oxidase, ec:2.1.2.10 - S-aminomethyldihydrolipoylprotein:(6S)-tetrahydrofolate aminomethyltransferase (ammon…
Mj_1_GCCAAT_L005_R1_001_(paired)_trimmed_(paired)_contig_92937	Folate biosynthesis, Fructose and mannose metabolism, Arachidonic acid metabolism, Metabolism of xenobiotics by cytochrome P450, Pentose and glucuronate interconversions	map00790, map00051, map00590, map00980, map00040	17, 27, 9, 8, 20	ec:3.4.19.9 - gamma-glutamyl hydrolase, ec:2.5.1.15 - synthase, ec:1.1.1.21 - reductase, ec:6.3.2.12 - synthase, ec:2.10.1.1 - molybdotransferase, ec:4.2.1.96 - dehydratase, ec:3.5.4.25 - cyclohydrolase II, ec:3.5.4.16 - cyclohydrolase I, ec:6.3.2.17 - synthase, ec:2.7.6.3 - diphosphokinase, ec:2.6.1.85 - synthase, ec:1.1.1.184 - reductase (NADPH), ec:2.7.7.75 - adenylyltransferase, ec:4.1.2.25 -…
TR72784|c0_g1_i1	Glycine, serine and threonine metabolism, Cysteine and methionine metabolism, Monobactam biosynthesis, Lysine biosynthesis	map00260, map00270, map00261, map00300	39, 45, 5, 12	ec:2.3.1.37 - synthase, ec:2.7.1.31 - 3-kinase, ec:1.2.1.11 - dehydrogenase, ec:4.3.1.18 - ammonia-lyase, ec:4.1.2.5 - aldolase, ec:2.7.1.39 - kinase, ec:2.1.2.1 - hydroxymethyltransferase, ec:1.1.1.81 - reductase, ec:2.1.1.5 - S-methyltransferase, ec:2.6.1.45 - transaminase, ec:1.5.3.10 - oxidase, ec:2.1.2.10 - S-aminomethyldihydrolipoylprotein:(6S)-tetrahydrofolate aminomethyltransferase (ammon…
Mj_1_GCCAAT_L005_R1_001_(paired)_trimmed_(paired)_contig_91607	Starch and sucrose metabolism	map00500	35	ec:3.2.1.4 - endo-1,4-beta-D-glucanase, ec:3.2.1.26 - invertase, ec:3.6.1.9 - diphosphatase, ec:2.7.7.9 - uridylyltransferase, ec:2.4.1.15 - synthase (UDP-forming), ec:3.2.1.1 - glycogenase, ec:3.2.1.39 - endo-1,3-beta-D-glucosidase, ec:2.4.1.21 - synthase (glycosyl-transferring), ec:2.4.1.12 - synthase (UDP-forming), ec:2.7.1.4 - fructokinase (phosphorylating), ec:5.3.1.9 - isomerase, ec:2.4.1.3…
TR78644|c2_g2_i1	Glutathione metabolism, Phenylpropanoid biosynthesis	map00480, map00940	19, 17	ec:1.11.1.11 - peroxidase, ec:1.17.4.1 - reductase, ec:3.5.2.9 - (ATP-hydrolysing), ec:1.8.5.1 - dehydrogenase (ascorbate), ec:1.11.1.15 - to 1.11.1.24 and 1.11.1.25 and 1.11.1.26 and 1.11.1.27 and 1.11.1.28 and 1.11.1.29, ec:1.1.1.42 - dehydrogenase (NADP+), ec:1.11.1.12 - glutathione peroxidase, ec:2.5.1.16 - synthase, ec:6.3.2.2 - ligase, ec:1.8.1.7 - reductase, ec:3.4.19.13 - gamma-glutamate …
TR77245|c3_g1_i1	Amino sugar and nucleotide sugar metabolism	map00520	46	ec:5.1.3.2 - 4-epimerase, ec:2.4.2.24 - synthase, ec:2.7.7.9 - uridylyltransferase, ec:2.7.1.7 - mannokinase (phosphorylating), ec:5.4.2.8 - mannose phosphomutase, ec:2.7.1.44 - galacturonokinase (phosphorylating) D-galacturonic acid kinase, ec:2.7.7.22 - guanylyltransferase (GDP), ec:5.1.3.6 - 4-epimerase, ec:3.2.1.14 - ChiC, ec:2.7.7.13 - guanylyltransferase, ec:5.1.3.12 - 5'-epimerase, ec:2.7.…
TR77245|c3_g1_i2	Amino sugar and nucleotide sugar metabolism	map00520	46	ec:5.1.3.2 - 4-epimerase, ec:2.4.2.24 - synthase, ec:2.7.7.9 - uridylyltransferase, ec:2.7.1.7 - mannokinase (phosphorylating), ec:5.4.2.8 - mannose phosphomutase, ec:2.7.1.44 - galacturonokinase (phosphorylating) D-galacturonic acid kinase, ec:2.7.7.22 - guanylyltransferase (GDP), ec:5.1.3.6 - 4-epimerase, ec:3.2.1.14 - ChiC, ec:2.7.7.13 - guanylyltransferase, ec:5.1.3.12 - 5'-epimerase, ec:2.7.…
TR67196|c1_g1_i2	T cell receptor signaling pathway	map04660	2	ec:2.7.10.2 - protein-tyrosine kinase, ec:3.1.3.16 - phosphatase
TR67196|c1_g1_i4	T cell receptor signaling pathway	map04660	2	ec:2.7.10.2 - protein-tyrosine kinase, ec:3.1.3.16 - phosphatase
TR79609|c0_g2_i1	T cell receptor signaling pathway, Th1 and Th2 cell differentiation, PD-L1 expression and PD-1 checkpoint pathway in cancer	map04660, map04658, map05235	2, 1, 1	ec:2.7.10.2 - protein-tyrosine kinase, ec:3.1.3.16 - phosphatase, ec:3.1.3.16 - phosphatase, ec:3.1.3.16 - phosphatase
Mj_1_GCCAAT_L005_R1_001_(paired)_trimmed_(paired)_contig_106508	Pentose and glucuronate interconversions	map00040	20	ec:2.7.1.17 - xylulokinase (phosphorylating), ec:5.1.3.1 - 3-epimerase, ec:5.3.1.5 - isomerase, ec:2.7.7.9 - uridylyltransferase, ec:1.1.1.21 - reductase, ec:3.2.1.31 - beta-glucuronide glucuronohydrolase glucuronidase, ec:1.1.1.12 - 4-dehydrogenase, ec:2.7.7.44 - uridylyltransferase, ec:1.1.1.22 - 6-dehydrogenase, ec:1.1.1.9 - reductase, ec:3.1.1.11 - pectin demethoxylase, ec:3.2.1.15 - pectin d…
TR72205|c1_g1_i3	Purine metabolism	map00230	60	ec:3.6.1.15 - phosphatase, ec:4.6.1.2 - cyclase, ec:3.2.2.7 - nucleosidase, ec:3.6.1.9 - diphosphatase, ec:1.17.4.1 - reductase, ec:2.7.4.10 - kinase, ec:6.3.3.1 - cyclo-ligase, ec:1.7.3.3 - urate hydroxylase, ec:3.1.3.5 - uridine 5'-nucleotidase, ec:2.7.1.74 - kinase, ec:6.3.2.6 - synthase, ec:3.5.3.9 - deiminase, ec:3.2.2.1 - nucleosidase, ec:1.17.3.2 - oxidase, ec:2.7.4.3 - kinase, ec:3.5.2.17…
Mj_1_GCCAAT_L005_R1_001_(paired)_trimmed_(paired)_contig_16272	Glycine, serine and threonine metabolism, One carbon pool by folate	map00260, map00670	39, 14	ec:2.3.1.37 - synthase, ec:2.7.1.31 - 3-kinase, ec:1.2.1.11 - dehydrogenase, ec:4.3.1.18 - ammonia-lyase, ec:4.1.2.5 - aldolase, ec:2.7.1.39 - kinase, ec:2.1.2.1 - hydroxymethyltransferase, ec:1.1.1.81 - reductase, ec:2.1.1.5 - S-methyltransferase, ec:2.6.1.45 - transaminase, ec:1.5.3.10 - oxidase, ec:2.1.2.10 - S-aminomethyldihydrolipoylprotein:(6S)-tetrahydrofolate aminomethyltransferase (ammon…
TR65650|c1_g1_i2	Pyruvate metabolism, Pentose phosphate pathway, Glyoxylate and dicarboxylate metabolism, Glutathione metabolism	map00620, map00030, map00630, map00480	33, 21, 34, 19	ec:4.1.1.32 - carboxykinase (GTP), ec:1.2.1.3 - dehydrogenase (NAD+), ec:1.1.1.79 - reductase (NADP+), ec:4.1.1.49 - carboxykinase (ATP), ec:2.3.1.12 - acetyltransferase, ec:1.1.2.3 - dehydrogenase (cytochrome), ec:1.1.1.37 - dehydrogenase, ec:1.1.1.28 - dehydrogenase, ec:3.1.2.1 - hydrolase, ec:2.7.9.1 - phosphate dikinase, ec:6.4.1.2 - carboxylase, ec:1.1.2.4 - dehydrogenase (cytochrome), ec:3.…
Mj_1_GCCAAT_L005_R1_001_(paired)_trimmed_(paired)_contig_16271	Biosynthesis of siderophore group nonribosomal peptides, Ubiquinone and other terpenoid-quinone biosynthesis	map01053, map00130	3, 14	ec:1.3.1.28 - dehydrogenase, ec:3.3.2.1 - 2,3-dihydro-2,3-dihydroxybenzoate synthase, ec:5.4.4.2 - synthase, ec:2.5.1.39 - polyprenyltransferase, ec:1.1.1.237 - reductase, ec:1.6.5.2 - dehydrogenase (quinone), ec:2.1.1.64 - 3-O-methyltransferase, ec:2.1.1.95 - C-methyltransferase, ec:4.1.3.36 - synthase, ec:1.13.11.27 - dioxygenase, ec:2.6.1.5 - transaminase, ec:4.2.99.20 - synthase, ec:6.2.1.26 …
Mj_1_GCCAAT_L005_R1_001_(paired)_trimmed_(paired)_contig_16270	Pyruvate metabolism, Glycine, serine and threonine metabolism, Glyoxylate and dicarboxylate metabolism	map00620, map00260, map00630	33, 39, 34	ec:4.1.1.32 - carboxykinase (GTP), ec:1.2.1.3 - dehydrogenase (NAD+), ec:1.1.1.79 - reductase (NADP+), ec:4.1.1.49 - carboxykinase (ATP), ec:2.3.1.12 - acetyltransferase, ec:1.1.2.3 - dehydrogenase (cytochrome), ec:1.1.1.37 - dehydrogenase, ec:1.1.1.28 - dehydrogenase, ec:3.1.2.1 - hydrolase, ec:2.7.9.1 - phosphate dikinase, ec:6.4.1.2 - carboxylase, ec:1.1.2.4 - dehydrogenase (cytochrome), ec:3.…
TR65650|c1_g1_i1	Pyruvate metabolism, Pentose phosphate pathway, Glyoxylate and dicarboxylate metabolism, Glutathione metabolism	map00620, map00030, map00630, map00480	33, 21, 34, 19	ec:4.1.1.32 - carboxykinase (GTP), ec:1.2.1.3 - dehydrogenase (NAD+), ec:1.1.1.79 - reductase (NADP+), ec:4.1.1.49 - carboxykinase (ATP), ec:2.3.1.12 - acetyltransferase, ec:1.1.2.3 - dehydrogenase (cytochrome), ec:1.1.1.37 - dehydrogenase, ec:1.1.1.28 - dehydrogenase, ec:3.1.2.1 - hydrolase, ec:2.7.9.1 - phosphate dikinase, ec:6.4.1.2 - carboxylase, ec:1.1.2.4 - dehydrogenase (cytochrome), ec:3.…
TR72205|c1_g1_i5	Purine metabolism	map00230	60	ec:3.6.1.15 - phosphatase, ec:4.6.1.2 - cyclase, ec:3.2.2.7 - nucleosidase, ec:3.6.1.9 - diphosphatase, ec:1.17.4.1 - reductase, ec:2.7.4.10 - kinase, ec:6.3.3.1 - cyclo-ligase, ec:1.7.3.3 - urate hydroxylase, ec:3.1.3.5 - uridine 5'-nucleotidase, ec:2.7.1.74 - kinase, ec:6.3.2.6 - synthase, ec:3.5.3.9 - deiminase, ec:3.2.2.1 - nucleosidase, ec:1.17.3.2 - oxidase, ec:2.7.4.3 - kinase, ec:3.5.2.17…
TR57542|c0_g1_i2	Glycosylphosphatidylinositol (GPI)-anchor biosynthesis	map00563	2	ec:3.5.1.89 - deacetylase, ec:2.4.1.198 - N-acetylglucosaminyltransferase
TR78879|c0_g1_i1	Propanoate metabolism, Valine, leucine and isoleucine degradation	map00640, map00280	21, 21	ec:4.1.1.9 - decarboxylase, ec:2.3.1.168 - (2-methylpropanoyl)transferase, ec:1.3.3.6 - oxidase, ec:4.2.1.79 - dehydratase, ec:6.4.1.2 - carboxylase, ec:4.1.3.30 - lyase, ec:2.6.1.19 - transaminase, ec:6.2.1.4 - ligase (GDP-forming), ec:6.2.1.1 - ligase, ec:6.4.1.3 - carboxylase, ec:1.8.1.4 - dehydrogenase, ec:1.2.4.4 - dehydrogenase (2-methylpropanoyl-transferring), ec:2.8.3.8 - CoA-transferase,…
TR72205|c1_g1_i1	Purine metabolism	map00230	60	ec:3.6.1.15 - phosphatase, ec:4.6.1.2 - cyclase, ec:3.2.2.7 - nucleosidase, ec:3.6.1.9 - diphosphatase, ec:1.17.4.1 - reductase, ec:2.7.4.10 - kinase, ec:6.3.3.1 - cyclo-ligase, ec:1.7.3.3 - urate hydroxylase, ec:3.1.3.5 - uridine 5'-nucleotidase, ec:2.7.1.74 - kinase, ec:6.3.2.6 - synthase, ec:3.5.3.9 - deiminase, ec:3.2.2.1 - nucleosidase, ec:1.17.3.2 - oxidase, ec:2.7.4.3 - kinase, ec:3.5.2.17…
TR63183|c1_g2_i7	Glycerophospholipid metabolism	map00564	33	ec:3.1.4.4 - D, ec:3.1.1.52 - deacylase, ec:2.3.1.51 - O-acyltransferase, ec:2.7.8.5 - 1-phosphatidyltransferase, ec:2.1.1.17 - N-methyltransferase, ec:1.1.1.8 - dehydrogenase (NAD+), ec:2.7.8.1 - EPT, ec:2.1.1.103 - N-methyltransferase, ec:2.7.1.107 - kinase (ATP), ec:3.1.1.32 - A1, ec:3.6.1.16 - diphosphatase, ec:2.7.1.32 - kinase, ec:3.1.3.75 - phosphatase, ec:1.1.1.94 - dehydrogenase [NAD(P)+…
C924398	Pentose and glucuronate interconversions	map00040	20	ec:2.7.1.17 - xylulokinase (phosphorylating), ec:5.1.3.1 - 3-epimerase, ec:5.3.1.5 - isomerase, ec:2.7.7.9 - uridylyltransferase, ec:1.1.1.21 - reductase, ec:3.2.1.31 - beta-glucuronide glucuronohydrolase glucuronidase, ec:1.1.1.12 - 4-dehydrogenase, ec:2.7.7.44 - uridylyltransferase, ec:1.1.1.22 - 6-dehydrogenase, ec:1.1.1.9 - reductase, ec:3.1.1.11 - pectin demethoxylase, ec:3.2.1.15 - pectin d…
Mj_1_GCCAAT_L005_R1_001_(paired)_trimmed_(paired)_contig_17583	Riboflavin metabolism, Glyoxylate and dicarboxylate metabolism	map00740, map00630	12, 34	ec:3.6.1.9 - diphosphatase, ec:3.5.4.25 - cyclohydrolase II, ec:2.7.7.2 - synthase, ec:1.5.1.41 - reductase [NAD(P)H], ec:1.1.1.193 - reductase, ec:3.5.4.26 - deaminase, ec:3.1.3.2 - phosphatase, ec:4.1.99.12 - synthase, ec:1.5.1.30 - reductase (NADPH), ec:3.6.1.18 - diphosphatase, ec:2.7.1.26 - kinase, ec:2.5.1.9 - synthase, ec:3.5.1.9 - kynurenine formamidase, ec:4.1.3.1 - lyase, ec:1.1.1.79 - …
Mj_1_GCCAAT_L005_R1_001_(paired)_trimmed_(paired)_contig_91619	Pentose and glucuronate interconversions	map00040	20	ec:2.7.1.17 - xylulokinase (phosphorylating), ec:5.1.3.1 - 3-epimerase, ec:5.3.1.5 - isomerase, ec:2.7.7.9 - uridylyltransferase, ec:1.1.1.21 - reductase, ec:3.2.1.31 - beta-glucuronide glucuronohydrolase glucuronidase, ec:1.1.1.12 - 4-dehydrogenase, ec:2.7.7.44 - uridylyltransferase, ec:1.1.1.22 - 6-dehydrogenase, ec:1.1.1.9 - reductase, ec:3.1.1.11 - pectin demethoxylase, ec:3.2.1.15 - pectin d…
TR63183|c1_g2_i2	Glycerophospholipid metabolism	map00564	33	ec:3.1.4.4 - D, ec:3.1.1.52 - deacylase, ec:2.3.1.51 - O-acyltransferase, ec:2.7.8.5 - 1-phosphatidyltransferase, ec:2.1.1.17 - N-methyltransferase, ec:1.1.1.8 - dehydrogenase (NAD+), ec:2.7.8.1 - EPT, ec:2.1.1.103 - N-methyltransferase, ec:2.7.1.107 - kinase (ATP), ec:3.1.1.32 - A1, ec:3.6.1.16 - diphosphatase, ec:2.7.1.32 - kinase, ec:3.1.3.75 - phosphatase, ec:1.1.1.94 - dehydrogenase [NAD(P)+…
TR72927|c2_g2_i2	Indole alkaloid biosynthesis	map00901	6	ec:1.14.11.20 - 4-hydroxylase, ec:3.1.1.78 - esterase, ec:2.4.1.219 - glucosyltransferase, ec:4.3.3.2 - synthase, ec:3.2.1.125 - beta-glucosidase, ec:3.2.1.105 - beta-glucosidase
TR15718|c0_g1_i1	Carbon fixation in photosynthetic organisms, Pentose phosphate pathway, Fructose and mannose metabolism, Methane metabolism, Glycolysis / Gluconeogenesis	map00710, map00030, map00051, map00680, map00010	22, 21, 27, 23, 28	ec:5.1.3.1 - 3-epimerase, ec:4.1.1.49 - carboxykinase (ATP), ec:2.7.2.3 - kinase, ec:1.1.1.37 - dehydrogenase, ec:5.3.1.1 - isomerase, ec:2.7.9.1 - phosphate dikinase, ec:2.6.1.1 - transaminase, ec:1.2.1.12 - dehydrogenase (phosphorylating), ec:3.1.3.11 - hexose diphosphatase, ec:5.3.1.6 - isomerase, ec:2.2.1.1 - glycolaldehydetransferase, ec:4.1.2.13 - aldolase, ec:1.1.1.82 - dehydrogenase (NADP…
TR77617|c0_g1_i2	Purine metabolism	map00230	60	ec:3.6.1.15 - phosphatase, ec:4.6.1.2 - cyclase, ec:3.2.2.7 - nucleosidase, ec:3.6.1.9 - diphosphatase, ec:1.17.4.1 - reductase, ec:2.7.4.10 - kinase, ec:6.3.3.1 - cyclo-ligase, ec:1.7.3.3 - urate hydroxylase, ec:3.1.3.5 - uridine 5'-nucleotidase, ec:2.7.1.74 - kinase, ec:6.3.2.6 - synthase, ec:3.5.3.9 - deiminase, ec:3.2.2.1 - nucleosidase, ec:1.17.3.2 - oxidase, ec:2.7.4.3 - kinase, ec:3.5.2.17…
TR24599|c0_g1_i1	Steroid hormone biosynthesis, Fatty acid biosynthesis, Biotin metabolism	map00140, map00061, map00780	12, 12, 9	ec:1.1.1.51 - 17)beta-hydroxysteroid dehydrogenase, ec:1.14.14.1 - monooxygenase, ec:1.3.1.3 - 5beta-reductase, ec:2.1.1.6 - O-methyltransferase, ec:1.1.1.145 - dehydrogenase, ec:1.1.1.62 - 17-dehydrogenase, ec:2.4.1.17 - 1-naphthol glucuronyltransferase, ec:1.1.1.53 - 20beta)-hydroxysteroid dehydrogenase, ec:1.1.1.149 - dehydrogenase, ec:1.3.1.22 - 4-dehydrogenase (NADP+), ec:1.1.1.146 - dehydro…
Mj_1_GCCAAT_L005_R1_001_(paired)_trimmed_(paired)_contig_29563	Anthocyanin biosynthesis, Zeatin biosynthesis	map00942, map00908	4, 5	ec:2.4.1.238 - 3,5-di-O-glucoside 3'-O-glucosyltransferase, ec:2.3.1.153 - 5-(6'''-hydroxycinnamoyltransferase), ec:2.4.1.115 - 3-O-glucosyltransferase, ec:2.3.1.171 - 6''-O-malonyltransferase, ec:2.5.1.75 - dimethylallyltransferase, ec:2.5.1.27 - dimethylallyltransferase, ec:2.4.1.215 - O-beta-D-glucosyltransferase, ec:2.4.1.203 - O-beta-D-glucosyltransferase, ec:1.5.99.12 - dehydrogenase
TR72927|c2_g2_i6	Indole alkaloid biosynthesis	map00901	6	ec:1.14.11.20 - 4-hydroxylase, ec:3.1.1.78 - esterase, ec:2.4.1.219 - glucosyltransferase, ec:4.3.3.2 - synthase, ec:3.2.1.125 - beta-glucosidase, ec:3.2.1.105 - beta-glucosidase
C734991	Indole alkaloid biosynthesis, Cyanoamino acid metabolism	map00901, map00460	6, 13	ec:1.14.11.20 - 4-hydroxylase, ec:3.1.1.78 - esterase, ec:2.4.1.219 - glucosyltransferase, ec:4.3.3.2 - synthase, ec:3.2.1.125 - beta-glucosidase, ec:3.2.1.105 - beta-glucosidase, ec:3.5.1.49 - ec:3.5.1.49 formamidase, ec:3.5.5.1 - acetonitrilase, ec:3.2.1.118 - beta-glucosidase, ec:2.1.2.1 - hydroxymethyltransferase, ec:4.4.1.9 - synthase, ec:3.2.1.117 - beta-glucosidase, ec:4.2.1.65 - hydratase…
TR79182|c0_g1_i1	Glycosaminoglycan degradation, Other glycan degradation, Galactose metabolism, Sphingolipid metabolism, Glycosphingolipid biosynthesis - ganglio series	map00531, map00511, map00052, map00600, map00604	4, 8, 20, 14, 4	ec:3.2.1.31 - beta-glucuronide glucuronohydrolase glucuronidase, ec:3.2.1.23 - lactase (ambiguous), ec:3.2.1.50 - alpha-acetylglucosaminidase, ec:3.2.1.52 - hexosaminidase, ec:3.2.1.23 - lactase (ambiguous), ec:3.5.1.26 - aspartylglucosylamine deaspartylase, ec:3.2.1.96 - endo-beta-N-acetylglucosaminidase, ec:3.2.1.24 - alpha-D-mannosidase, ec:3.2.1.45 - psychosine hydrolase, ec:3.2.1.51 - alpha-…
Mj_1_GCCAAT_L005_R1_001_(paired)_trimmed_(paired)_contig_107855	Pentose phosphate pathway, Glutathione metabolism	map00030, map00480	21, 19	ec:5.1.3.1 - 3-epimerase, ec:2.7.1.11 - phosphohexokinase, ec:5.3.1.9 - isomerase, ec:3.1.3.11 - hexose diphosphatase, ec:1.1.1.47 - 1-dehydrogenase [NAD(P)+], ec:5.3.1.6 - isomerase, ec:2.7.1.15 - deoxyribokinase, ec:2.2.1.1 - glycolaldehydetransferase, ec:4.1.2.13 - aldolase, ec:2.7.1.12 - gluconokinase (phosphorylating), ec:2.7.1.90 - 1-phosphotransferase, ec:5.4.2.2 - (alpha-D-glucose-1,6-bis…
TR76163|c1_g1_i7	Flavonoid biosynthesis	map00941	10	ec:1.1.1.234 - 4-reductase, ec:1.17.1.3 - reductase, ec:2.3.1.170 - synthase, ec:2.1.1.104 - O-methyltransferase, ec:2.3.1.74 - synthase, ec:5.5.1.6 - isomerase, ec:1.3.1.77 - reductase [(2R,3R)-flavan-3-ol-forming], ec:1.1.1.219 - 4-reductase, ec:2.3.1.133 - O-hydroxycinnamoyltransferase, ec:1.14.11.9 - 3-dioxygenase
Mj_1_GCCAAT_L005_R1_001_(paired)_trimmed_(paired)_contig_107858	Thiamine metabolism, Vitamin B6 metabolism	map00730, map00750	12, 8	ec:3.6.1.15 - phosphatase, ec:2.7.4.7 - kinase, ec:2.8.1.7 - desulfurase, ec:2.7.6.2 - diphosphokinase, ec:2.7.1.50 - kinase, ec:2.7.4.3 - kinase, ec:2.7.1.49 - kinase, ec:3.5.99.2 - aminohydrolase, ec:2.5.1.3 - phosphate synthase, ec:3.1.3.2 - phosphatase, ec:4.1.99.19 - synthase, ec:2.2.1.7 - synthase, ec:1.4.3.5 - 5'-phosphate synthase, ec:4.2.3.1 - synthase, ec:1.1.1.65 - 4-dehydrogenase, ec:…
Mj_1_GCCAAT_L005_R1_001_(paired)_trimmed_(paired)_contig_106526	Glutathione metabolism	map00480	19	ec:1.11.1.11 - peroxidase, ec:1.17.4.1 - reductase, ec:3.5.2.9 - (ATP-hydrolysing), ec:1.8.5.1 - dehydrogenase (ascorbate), ec:1.11.1.15 - to 1.11.1.24 and 1.11.1.25 and 1.11.1.26 and 1.11.1.27 and 1.11.1.28 and 1.11.1.29, ec:1.1.1.42 - dehydrogenase (NADP+), ec:1.11.1.12 - glutathione peroxidase, ec:2.5.1.16 - synthase, ec:6.3.2.2 - ligase, ec:1.8.1.7 - reductase, ec:3.4.19.13 - gamma-glutamate …
TR76163|c1_g1_i6	Flavonoid biosynthesis	map00941	10	ec:1.1.1.234 - 4-reductase, ec:1.17.1.3 - reductase, ec:2.3.1.170 - synthase, ec:2.1.1.104 - O-methyltransferase, ec:2.3.1.74 - synthase, ec:5.5.1.6 - isomerase, ec:1.3.1.77 - reductase [(2R,3R)-flavan-3-ol-forming], ec:1.1.1.219 - 4-reductase, ec:2.3.1.133 - O-hydroxycinnamoyltransferase, ec:1.14.11.9 - 3-dioxygenase
C756309	Ubiquinone and other terpenoid-quinone biosynthesis	map00130	14	ec:2.5.1.39 - polyprenyltransferase, ec:1.1.1.237 - reductase, ec:1.6.5.2 - dehydrogenase (quinone), ec:2.1.1.64 - 3-O-methyltransferase, ec:2.1.1.95 - C-methyltransferase, ec:4.1.3.36 - synthase, ec:1.13.11.27 - dioxygenase, ec:2.6.1.5 - transaminase, ec:4.2.99.20 - synthase, ec:6.2.1.26 - ligase, ec:2.2.1.9 - synthase, ec:2.1.1.114 - methyltransferase, ec:5.4.4.2 - synthase, ec:6.2.1.12 - ligase
TR47677|c0_g1_i1	Amino sugar and nucleotide sugar metabolism, Glyoxylate and dicarboxylate metabolism, Fructose and mannose metabolism	map00520, map00630, map00051	46, 34, 27	ec:5.1.3.2 - 4-epimerase, ec:2.4.2.24 - synthase, ec:2.7.7.9 - uridylyltransferase, ec:2.7.1.7 - mannokinase (phosphorylating), ec:5.4.2.8 - mannose phosphomutase, ec:2.7.1.44 - galacturonokinase (phosphorylating) D-galacturonic acid kinase, ec:2.7.7.22 - guanylyltransferase (GDP), ec:5.1.3.6 - 4-epimerase, ec:3.2.1.14 - ChiC, ec:2.7.7.13 - guanylyltransferase, ec:5.1.3.12 - 5'-epimerase, ec:2.7.…
TR126091|c0_g1_i1	Glycine, serine and threonine metabolism, Fructose and mannose metabolism, Pentose and glucuronate interconversions	map00260, map00051, map00040	39, 27, 20	ec:2.3.1.37 - synthase, ec:2.7.1.31 - 3-kinase, ec:1.2.1.11 - dehydrogenase, ec:4.3.1.18 - ammonia-lyase, ec:4.1.2.5 - aldolase, ec:2.7.1.39 - kinase, ec:2.1.2.1 - hydroxymethyltransferase, ec:1.1.1.81 - reductase, ec:2.1.1.5 - S-methyltransferase, ec:2.6.1.45 - transaminase, ec:1.5.3.10 - oxidase, ec:2.1.2.10 - S-aminomethyldihydrolipoylprotein:(6S)-tetrahydrofolate aminomethyltransferase (ammon…
C746977	Pyruvate metabolism	map00620	33	ec:4.1.1.32 - carboxykinase (GTP), ec:1.2.1.3 - dehydrogenase (NAD+), ec:1.1.1.79 - reductase (NADP+), ec:4.1.1.49 - carboxykinase (ATP), ec:2.3.1.12 - acetyltransferase, ec:1.1.2.3 - dehydrogenase (cytochrome), ec:1.1.1.37 - dehydrogenase, ec:1.1.1.28 - dehydrogenase, ec:3.1.2.1 - hydrolase, ec:2.7.9.1 - phosphate dikinase, ec:6.4.1.2 - carboxylase, ec:1.1.2.4 - dehydrogenase (cytochrome), ec:3.…
Mj_1_GCCAAT_L005_R1_001_(paired)_trimmed_(paired)_contig_80932	T cell receptor signaling pathway, Th1 and Th2 cell differentiation, PD-L1 expression and PD-1 checkpoint pathway in cancer	map04660, map04658, map05235	2, 1, 1	ec:2.7.10.2 - protein-tyrosine kinase, ec:3.1.3.16 - phosphatase, ec:3.1.3.16 - phosphatase, ec:3.1.3.16 - phosphatase
Mj_1_GCCAAT_L005_R1_001_(paired)_trimmed_(paired)_contig_52012	Pyruvate metabolism	map00620	33	ec:4.1.1.32 - carboxykinase (GTP), ec:1.2.1.3 - dehydrogenase (NAD+), ec:1.1.1.79 - reductase (NADP+), ec:4.1.1.49 - carboxykinase (ATP), ec:2.3.1.12 - acetyltransferase, ec:1.1.2.3 - dehydrogenase (cytochrome), ec:1.1.1.37 - dehydrogenase, ec:1.1.1.28 - dehydrogenase, ec:3.1.2.1 - hydrolase, ec:2.7.9.1 - phosphate dikinase, ec:6.4.1.2 - carboxylase, ec:1.1.2.4 - dehydrogenase (cytochrome), ec:3.…
C911051	Phosphatidylinositol signaling system, Inositol phosphate metabolism	map04070, map00562	20, 25	ec:2.7.1.127 - 3-kinase, ec:2.7.1.158 - 2-kinase, ec:3.1.3.56 - 5-phosphatase, ec:2.7.1.107 - kinase (ATP), ec:2.7.1.137 - 3-kinase, ec:2.7.1.151 - multikinase, ec:3.1.4.11 - phospholipase C, ec:2.7.1.159 - 5/6-kinase, ec:3.1.3.36 - 5-phosphatase, ec:2.7.11.13 - kinase C, ec:3.1.3.57 - 1-phosphatase, ec:2.7.1.67 - 4-kinase, ec:2.7.8.11 - 3-phosphatidyltransferase, ec:2.7.7.41 - cytidylyltransfera…
Mj_1_GCCAAT_L005_R1_001_(paired)_trimmed_(paired)_contig_39053	Ascorbate and aldarate metabolism, Glutathione metabolism	map00053, map00480	18, 19	ec:1.11.1.11 - peroxidase, ec:1.2.1.3 - dehydrogenase (NAD+), ec:4.1.2.20 - aldolase, ec:1.8.5.1 - dehydrogenase (ascorbate), ec:1.1.1.122 - 1-dehydrogenase, ec:1.10.3.3 - oxidase, ec:2.7.7.44 - uridylyltransferase, ec:1.1.3.8 - oxidase, ec:1.1.1.22 - 6-dehydrogenase, ec:1.3.2.3 - dehydrogenase, ec:1.6.5.4 - reductase (NADH), ec:1.13.99.1 - oxygenase, ec:5.1.3.18 - 3,5-epimerase, ec:2.4.1.17 - 1-…
TR56281|c1_g2_i1	Anthocyanin biosynthesis	map00942	4	ec:2.4.1.238 - 3,5-di-O-glucoside 3'-O-glucosyltransferase, ec:2.3.1.153 - 5-(6'''-hydroxycinnamoyltransferase), ec:2.4.1.115 - 3-O-glucosyltransferase, ec:2.3.1.171 - 6''-O-malonyltransferase
TR79724|c3_g2_i1	T cell receptor signaling pathway, Th1 and Th2 cell differentiation, PD-L1 expression and PD-1 checkpoint pathway in cancer, Glycine, serine and threonine metabolism, Methane metabolism	map04660, map04658, map05235, map00260, map00680	2, 1, 1, 39, 23	ec:2.7.10.2 - protein-tyrosine kinase, ec:3.1.3.16 - phosphatase, ec:3.1.3.16 - phosphatase, ec:3.1.3.16 - phosphatase, ec:2.3.1.37 - synthase, ec:2.7.1.31 - 3-kinase, ec:1.2.1.11 - dehydrogenase, ec:4.3.1.18 - ammonia-lyase, ec:4.1.2.5 - aldolase, ec:2.7.1.39 - kinase, ec:2.1.2.1 - hydroxymethyltransferase, ec:1.1.1.81 - reductase, ec:2.1.1.5 - S-methyltransferase, ec:2.6.1.45 - transaminase, ec…
Mj_1_GCCAAT_L005_R1_001_(paired)_trimmed_(paired)_contig_92923	Glycine, serine and threonine metabolism	map00260	39	ec:2.3.1.37 - synthase, ec:2.7.1.31 - 3-kinase, ec:1.2.1.11 - dehydrogenase, ec:4.3.1.18 - ammonia-lyase, ec:4.1.2.5 - aldolase, ec:2.7.1.39 - kinase, ec:2.1.2.1 - hydroxymethyltransferase, ec:1.1.1.81 - reductase, ec:2.1.1.5 - S-methyltransferase, ec:2.6.1.45 - transaminase, ec:1.5.3.10 - oxidase, ec:2.1.2.10 - S-aminomethyldihydrolipoylprotein:(6S)-tetrahydrofolate aminomethyltransferase (ammon…
Mj_1_GCCAAT_L005_R1_001_(paired)_trimmed_(paired)_contig_107842	Starch and sucrose metabolism	map00500	35	ec:3.2.1.4 - endo-1,4-beta-D-glucanase, ec:3.2.1.26 - invertase, ec:3.6.1.9 - diphosphatase, ec:2.7.7.9 - uridylyltransferase, ec:2.4.1.15 - synthase (UDP-forming), ec:3.2.1.1 - glycogenase, ec:3.2.1.39 - endo-1,3-beta-D-glucosidase, ec:2.4.1.21 - synthase (glycosyl-transferring), ec:2.4.1.12 - synthase (UDP-forming), ec:2.7.1.4 - fructokinase (phosphorylating), ec:5.3.1.9 - isomerase, ec:2.4.1.3…
Mj_1_GCCAAT_L005_R1_001_(paired)_trimmed_(paired)_contig_16236	Indole alkaloid biosynthesis	map00901	6	ec:1.14.11.20 - 4-hydroxylase, ec:3.1.1.78 - esterase, ec:2.4.1.219 - glucosyltransferase, ec:4.3.3.2 - synthase, ec:3.2.1.125 - beta-glucosidase, ec:3.2.1.105 - beta-glucosidase
TR104271|c0_g1_i1	Glyoxylate and dicarboxylate metabolism, Carbon fixation pathways in prokaryotes, Citrate cycle (TCA cycle)	map00630, map00720, map00020	34, 21, 18	ec:3.5.1.9 - kynurenine formamidase, ec:4.1.3.1 - lyase, ec:1.1.1.79 - reductase (NADP+), ec:2.7.1.31 - 3-kinase, ec:3.5.1.49 - ec:3.5.1.49 formamidase, ec:4.1.1.2 - decarboxylase, ec:1.1.1.60 - reductase, ec:3.1.3.18 - phosphatase, ec:1.1.1.37 - dehydrogenase, ec:1.1.99.14 - dehydrogenase, ec:2.1.2.1 - hydroxymethyltransferase, ec:1.1.1.81 - reductase, ec:6.3.1.2 - synthetase, ec:2.6.1.45 - tran…
TR61876|c1_g1_i2	Drug metabolism - other enzymes, Isoflavonoid biosynthesis	map00983, map00943	19, 3	ec:2.7.1.48 - kinase, ec:3.5.2.2 - hydantoinase, ec:3.1.1.1 - ali-esterase, ec:1.17.4.1 - reductase, ec:1.3.1.2 - dehydrogenase (NADP+), ec:3.5.1.6 - N-carbamoyl-beta-alanine amidohydrolase, ec:3.2.1.31 - beta-glucuronide glucuronohydrolase glucuronidase, ec:3.5.4.5 - deaminase, ec:1.17.3.2 - oxidase, ec:2.7.4.14 - kinase, ec:1.1.1.205 - dehydrogenase, ec:2.4.2.10 - phosphoribosyltransferase, ec:…
Mj_1_GCCAAT_L005_R1_001_(paired)_trimmed_(paired)_contig_66651	T cell receptor signaling pathway, Th1 and Th2 cell differentiation, PD-L1 expression and PD-1 checkpoint pathway in cancer	map04660, map04658, map05235	2, 1, 1	ec:2.7.10.2 - protein-tyrosine kinase, ec:3.1.3.16 - phosphatase, ec:3.1.3.16 - phosphatase, ec:3.1.3.16 - phosphatase
C974654	Phosphatidylinositol signaling system, Inositol phosphate metabolism	map04070, map00562	20, 25	ec:2.7.1.127 - 3-kinase, ec:2.7.1.158 - 2-kinase, ec:3.1.3.56 - 5-phosphatase, ec:2.7.1.107 - kinase (ATP), ec:2.7.1.137 - 3-kinase, ec:2.7.1.151 - multikinase, ec:3.1.4.11 - phospholipase C, ec:2.7.1.159 - 5/6-kinase, ec:3.1.3.36 - 5-phosphatase, ec:2.7.11.13 - kinase C, ec:3.1.3.57 - 1-phosphatase, ec:2.7.1.67 - 4-kinase, ec:2.7.8.11 - 3-phosphatidyltransferase, ec:2.7.7.41 - cytidylyltransfera…
TR61477|c0_g1_i2	Cysteine and methionine metabolism	map00270	45	ec:1.13.11.53 - dioxygenase (Ni2+-requiring), ec:1.2.1.11 - dehydrogenase, ec:1.13.11.20 - dioxygenase, ec:4.4.1.14 - synthase, ec:2.6.1.57 - transaminase, ec:1.1.1.37 - dehydrogenase, ec:1.14.17.4 - oxidase, ec:2.6.1.5 - transaminase, ec:4.1.1.50 - decarboxylase, ec:2.1.1.13 - synthase, ec:2.5.1.49 - aminocarboxypropyltransferase, ec:2.3.1.30 - O-acetyltransferase, ec:2.1.1.5 - S-methyltransfera…
TR61477|c0_g1_i1	Indole alkaloid biosynthesis	map00901	6	ec:1.14.11.20 - 4-hydroxylase, ec:3.1.1.78 - esterase, ec:2.4.1.219 - glucosyltransferase, ec:4.3.3.2 - synthase, ec:3.2.1.125 - beta-glucosidase, ec:3.2.1.105 - beta-glucosidase
Mj_1_GCCAAT_L005_R1_001_(paired)_trimmed_(paired)_contig_92927	Propanoate metabolism, Glyoxylate and dicarboxylate metabolism	map00640, map00630	21, 34	ec:4.1.1.9 - decarboxylase, ec:2.3.1.168 - (2-methylpropanoyl)transferase, ec:1.3.3.6 - oxidase, ec:4.2.1.79 - dehydratase, ec:6.4.1.2 - carboxylase, ec:4.1.3.30 - lyase, ec:2.6.1.19 - transaminase, ec:6.2.1.4 - ligase (GDP-forming), ec:6.2.1.1 - ligase, ec:6.4.1.3 - carboxylase, ec:1.8.1.4 - dehydrogenase, ec:1.2.4.4 - dehydrogenase (2-methylpropanoyl-transferring), ec:2.8.3.8 - CoA-transferase,…
TR72928|c0_g1_i3	Steroid hormone biosynthesis, Metabolism of xenobiotics by cytochrome P450	map00140, map00980	12, 8	ec:1.1.1.51 - 17)beta-hydroxysteroid dehydrogenase, ec:1.14.14.1 - monooxygenase, ec:1.3.1.3 - 5beta-reductase, ec:2.1.1.6 - O-methyltransferase, ec:1.1.1.145 - dehydrogenase, ec:1.1.1.62 - 17-dehydrogenase, ec:2.4.1.17 - 1-naphthol glucuronyltransferase, ec:1.1.1.53 - 20beta)-hydroxysteroid dehydrogenase, ec:1.1.1.149 - dehydrogenase, ec:1.3.1.22 - 4-dehydrogenase (NADP+), ec:1.1.1.146 - dehydro…
C911067	Alanine, aspartate and glutamate metabolism, Arginine biosynthesis, Nitrogen metabolism, Glyoxylate and dicarboxylate metabolism	map00250, map00220, map00910, map00630	29, 21, 18, 34	ec:1.4.1.14 - synthase (NADH), ec:4.1.1.15 - decarboxylase, ec:6.3.4.5 - synthase, ec:1.4.1.2 - dehydrogenase, ec:1.2.1.24 - dehydrogenase (NAD+), ec:6.3.1.2 - synthetase, ec:3.5.1.3 - alpha-keto acid-omega-amidase, ec:1.2.1.16 - dehydrogenase [NAD(P)+], ec:6.3.4.16 - synthase (ammonia), ec:6.3.5.5 - synthase (glutamine-hydrolysing), ec:2.6.1.1 - transaminase, ec:4.3.2.1 - lyase, ec:1.4.3.2 - oxi…
TR72928|c0_g1_i4	Steroid hormone biosynthesis, Metabolism of xenobiotics by cytochrome P450	map00140, map00980	12, 8	ec:1.1.1.51 - 17)beta-hydroxysteroid dehydrogenase, ec:1.14.14.1 - monooxygenase, ec:1.3.1.3 - 5beta-reductase, ec:2.1.1.6 - O-methyltransferase, ec:1.1.1.145 - dehydrogenase, ec:1.1.1.62 - 17-dehydrogenase, ec:2.4.1.17 - 1-naphthol glucuronyltransferase, ec:1.1.1.53 - 20beta)-hydroxysteroid dehydrogenase, ec:1.1.1.149 - dehydrogenase, ec:1.3.1.22 - 4-dehydrogenase (NADP+), ec:1.1.1.146 - dehydro…
TR75944|c0_g2_i1	Phosphatidylinositol signaling system	map04070	20	ec:2.7.1.127 - 3-kinase, ec:2.7.1.158 - 2-kinase, ec:3.1.3.56 - 5-phosphatase, ec:2.7.1.107 - kinase (ATP), ec:2.7.1.137 - 3-kinase, ec:2.7.1.151 - multikinase, ec:3.1.4.11 - phospholipase C, ec:2.7.1.159 - 5/6-kinase, ec:3.1.3.36 - 5-phosphatase, ec:2.7.11.13 - kinase C, ec:3.1.3.57 - 1-phosphatase, ec:2.7.1.67 - 4-kinase, ec:2.7.8.11 - 3-phosphatidyltransferase, ec:2.7.7.41 - cytidylyltransfera…
Mj_1_GCCAAT_L005_R1_001_(paired)_trimmed_(paired)_contig_28212	Thiamine metabolism, Riboflavin metabolism	map00730, map00740	12, 12	ec:3.6.1.15 - phosphatase, ec:2.7.4.7 - kinase, ec:2.8.1.7 - desulfurase, ec:2.7.6.2 - diphosphokinase, ec:2.7.1.50 - kinase, ec:2.7.4.3 - kinase, ec:2.7.1.49 - kinase, ec:3.5.99.2 - aminohydrolase, ec:2.5.1.3 - phosphate synthase, ec:3.1.3.2 - phosphatase, ec:4.1.99.19 - synthase, ec:2.2.1.7 - synthase, ec:3.6.1.9 - diphosphatase, ec:3.5.4.25 - cyclohydrolase II, ec:2.7.7.2 - synthase, ec:1.5.1.…
C912395	Cysteine and methionine metabolism	map00270	45	ec:1.13.11.53 - dioxygenase (Ni2+-requiring), ec:1.2.1.11 - dehydrogenase, ec:1.13.11.20 - dioxygenase, ec:4.4.1.14 - synthase, ec:2.6.1.57 - transaminase, ec:1.1.1.37 - dehydrogenase, ec:1.14.17.4 - oxidase, ec:2.6.1.5 - transaminase, ec:4.1.1.50 - decarboxylase, ec:2.1.1.13 - synthase, ec:2.5.1.49 - aminocarboxypropyltransferase, ec:2.3.1.30 - O-acetyltransferase, ec:2.1.1.5 - S-methyltransfera…
Mj_1_GCCAAT_L005_R1_001_(paired)_trimmed_(paired)_contig_53350	Starch and sucrose metabolism	map00500	35	ec:3.2.1.4 - endo-1,4-beta-D-glucanase, ec:3.2.1.26 - invertase, ec:3.6.1.9 - diphosphatase, ec:2.7.7.9 - uridylyltransferase, ec:2.4.1.15 - synthase (UDP-forming), ec:3.2.1.1 - glycogenase, ec:3.2.1.39 - endo-1,3-beta-D-glucosidase, ec:2.4.1.21 - synthase (glycosyl-transferring), ec:2.4.1.12 - synthase (UDP-forming), ec:2.7.1.4 - fructokinase (phosphorylating), ec:5.3.1.9 - isomerase, ec:2.4.1.3…
Mj_1_GCCAAT_L005_R1_001_(paired)_trimmed_(paired)_contig_79960	Diterpenoid biosynthesis	map00904	11	ec:1.14.11.15 - 3beta-dioxygenase, ec:4.2.3.35 - synthase, ec:4.2.3.18 - synthase, ec:4.2.3.8 - synthase, ec:4.2.3.28 - synthase, ec:2.3.1.162 - O-acetyltransferase, ec:4.2.3.19 - synthase, ec:4.2.3.33 - synthase, ec:4.2.3.34 - synthase, ec:5.5.1.13 - diphosphate synthase, ec:2.3.1.167 - III 10-O-acetyltransferase
TR72389|c1_g1_i2	Purine metabolism	map00230	60	ec:3.6.1.15 - phosphatase, ec:4.6.1.2 - cyclase, ec:3.2.2.7 - nucleosidase, ec:3.6.1.9 - diphosphatase, ec:1.17.4.1 - reductase, ec:2.7.4.10 - kinase, ec:6.3.3.1 - cyclo-ligase, ec:1.7.3.3 - urate hydroxylase, ec:3.1.3.5 - uridine 5'-nucleotidase, ec:2.7.1.74 - kinase, ec:6.3.2.6 - synthase, ec:3.5.3.9 - deiminase, ec:3.2.2.1 - nucleosidase, ec:1.17.3.2 - oxidase, ec:2.7.4.3 - kinase, ec:3.5.2.17…
TR72389|c1_g1_i3	Purine metabolism	map00230	60	ec:3.6.1.15 - phosphatase, ec:4.6.1.2 - cyclase, ec:3.2.2.7 - nucleosidase, ec:3.6.1.9 - diphosphatase, ec:1.17.4.1 - reductase, ec:2.7.4.10 - kinase, ec:6.3.3.1 - cyclo-ligase, ec:1.7.3.3 - urate hydroxylase, ec:3.1.3.5 - uridine 5'-nucleotidase, ec:2.7.1.74 - kinase, ec:6.3.2.6 - synthase, ec:3.5.3.9 - deiminase, ec:3.2.2.1 - nucleosidase, ec:1.17.3.2 - oxidase, ec:2.7.4.3 - kinase, ec:3.5.2.17…
TR79162|c1_g3_i11	Anthocyanin biosynthesis, Phenylpropanoid biosynthesis	map00942, map00940	4, 17	ec:2.4.1.238 - 3,5-di-O-glucoside 3'-O-glucosyltransferase, ec:2.3.1.153 - 5-(6'''-hydroxycinnamoyltransferase), ec:2.4.1.115 - 3-O-glucosyltransferase, ec:2.3.1.171 - 6''-O-malonyltransferase, ec:3.2.1.126 - beta-glucosidase, ec:1.1.1.195 - dehydrogenase, ec:1.11.1.7 - lactoperoxidase, ec:2.1.1.146 - O-methyltransferase, ec:1.2.1.68 - dehydrogenase, ec:4.3.1.24 - ammonia-lyase, ec:2.1.1.104 - O-…
Mj_1_GCCAAT_L005_R1_001_(paired)_trimmed_(paired)_contig_92977	Vitamin B6 metabolism	map00750	8	ec:1.4.3.5 - 5'-phosphate synthase, ec:4.2.3.1 - synthase, ec:1.1.1.65 - 4-dehydrogenase, ec:1.2.3.1 - oxidase, ec:1.1.1.107 - 4-dehydrogenase, ec:2.7.1.35 - kinase, ec:4.3.3.6 - 5'-phosphate synthase (glutamine hydrolysing), ec:2.6.1.52 - transaminase
Mj_1_GCCAAT_L005_R1_001_(paired)_trimmed_(paired)_contig_91644	Ascorbate and aldarate metabolism, Glutathione metabolism	map00053, map00480	18, 19	ec:1.11.1.11 - peroxidase, ec:1.2.1.3 - dehydrogenase (NAD+), ec:4.1.2.20 - aldolase, ec:1.8.5.1 - dehydrogenase (ascorbate), ec:1.1.1.122 - 1-dehydrogenase, ec:1.10.3.3 - oxidase, ec:2.7.7.44 - uridylyltransferase, ec:1.1.3.8 - oxidase, ec:1.1.1.22 - 6-dehydrogenase, ec:1.3.2.3 - dehydrogenase, ec:1.6.5.4 - reductase (NADH), ec:1.13.99.1 - oxygenase, ec:5.1.3.18 - 3,5-epimerase, ec:2.4.1.17 - 1-…
Mj_1_GCCAAT_L005_R1_001_(paired)_trimmed_(paired)_contig_17553	Pyruvate metabolism, Propanoate metabolism, Glyoxylate and dicarboxylate metabolism, Ubiquinone and other terpenoid-quinone biosynthesis, Butanoate metabolism, Methane metabolism, Carbon fixation pathways in prokaryotes, Glycolysis / Gluconeogenesis	map00620, map00640, map00630, map00130, map00650, map00680, map00720, map00010	33, 21, 34, 14, 19, 23, 21, 28	ec:4.1.1.32 - carboxykinase (GTP), ec:1.2.1.3 - dehydrogenase (NAD+), ec:1.1.1.79 - reductase (NADP+), ec:4.1.1.49 - carboxykinase (ATP), ec:2.3.1.12 - acetyltransferase, ec:1.1.2.3 - dehydrogenase (cytochrome), ec:1.1.1.37 - dehydrogenase, ec:1.1.1.28 - dehydrogenase, ec:3.1.2.1 - hydrolase, ec:2.7.9.1 - phosphate dikinase, ec:6.4.1.2 - carboxylase, ec:1.1.2.4 - dehydrogenase (cytochrome), ec:3.…
TR60887|c0_g1_i2	Peptidoglycan biosynthesis, Terpenoid backbone biosynthesis	map00550, map00900	5, 27	ec:2.7.8.13 - MraY transferase, ec:2.4.1.227 - beta-N-acetylglucosaminyltransferase, ec:6.3.2.13 - ligase, ec:2.5.1.31 - synthase [(2E,6E)-farnesyl-diphosphate specific], ec:6.3.2.4 - ligase, ec:2.7.4.2 - kinase, ec:2.5.1.84 - diphosphate synthase [geranyl-diphosphate specific], ec:4.2.3.27 - synthase, ec:1.8.3.5 - oxidase, ec:2.5.1.58 - farnesyltransferase, ec:2.7.1.36 - kinase, ec:1.1.1.34 - re…
Mj_1_GCCAAT_L005_R1_001_(paired)_trimmed_(paired)_contig_89327	Methane metabolism, Glycolysis / Gluconeogenesis	map00680, map00010	23, 28	ec:2.2.1.3 - transketolase, ec:4.4.1.22 - synthase, ec:4.2.1.11 - hydratase, ec:1.1.1.37 - dehydrogenase, ec:2.1.2.1 - hydroxymethyltransferase, ec:2.7.1.11 - phosphohexokinase, ec:2.6.1.45 - transaminase, ec:1.2.1.46 - dehydrogenase, ec:4.1.1.25 - decarboxylase, ec:3.1.3.11 - hexose diphosphatase, ec:1.1.3.13 - oxidase, ec:4.1.2.13 - aldolase, ec:1.1.1.29 - dehydrogenase, ec:6.2.1.1 - ligase, ec…
Mj_1_GCCAAT_L005_R1_001_(paired)_trimmed_(paired)_contig_92971	Glycine, serine and threonine metabolism	map00260	39	ec:2.3.1.37 - synthase, ec:2.7.1.31 - 3-kinase, ec:1.2.1.11 - dehydrogenase, ec:4.3.1.18 - ammonia-lyase, ec:4.1.2.5 - aldolase, ec:2.7.1.39 - kinase, ec:2.1.2.1 - hydroxymethyltransferase, ec:1.1.1.81 - reductase, ec:2.1.1.5 - S-methyltransferase, ec:2.6.1.45 - transaminase, ec:1.5.3.10 - oxidase, ec:2.1.2.10 - S-aminomethyldihydrolipoylprotein:(6S)-tetrahydrofolate aminomethyltransferase (ammon…
Mj_1_GCCAAT_L005_R1_001_(paired)_trimmed_(paired)_contig_92972	Porphyrin and chlorophyll metabolism	map00860	31	ec:2.3.1.37 - synthase, ec:3.1.1.14 - CLH, ec:1.3.7.4 - oxidoreductase, ec:4.99.1.4 - ferrochelatase, ec:4.2.1.75 - synthase, ec:3.2.1.31 - beta-glucuronide glucuronohydrolase glucuronidase, ec:4.1.1.37 - decarboxylase, ec:1.3.1.75 - protochlorophyllide a 8-vinyl-reductase (NADPH), ec:4.2.1.24 - synthase, ec:5.4.3.8 - 2,1-aminomutase, ec:1.3.1.33 - reductase, ec:2.1.1.107 - C-methyltransferase, e…
TR122350|c0_g1_i1	Carbon fixation in photosynthetic organisms, Glycolysis / Gluconeogenesis	map00710, map00010	22, 28	ec:5.1.3.1 - 3-epimerase, ec:4.1.1.49 - carboxykinase (ATP), ec:2.7.2.3 - kinase, ec:1.1.1.37 - dehydrogenase, ec:5.3.1.1 - isomerase, ec:2.7.9.1 - phosphate dikinase, ec:2.6.1.1 - transaminase, ec:1.2.1.12 - dehydrogenase (phosphorylating), ec:3.1.3.11 - hexose diphosphatase, ec:5.3.1.6 - isomerase, ec:2.2.1.1 - glycolaldehydetransferase, ec:4.1.2.13 - aldolase, ec:1.1.1.82 - dehydrogenase (NADP…
TR120862|c0_g1_i1	Glyoxylate and dicarboxylate metabolism, Carbon fixation pathways in prokaryotes, Citrate cycle (TCA cycle)	map00630, map00720, map00020	34, 21, 18	ec:3.5.1.9 - kynurenine formamidase, ec:4.1.3.1 - lyase, ec:1.1.1.79 - reductase (NADP+), ec:2.7.1.31 - 3-kinase, ec:3.5.1.49 - ec:3.5.1.49 formamidase, ec:4.1.1.2 - decarboxylase, ec:1.1.1.60 - reductase, ec:3.1.3.18 - phosphatase, ec:1.1.1.37 - dehydrogenase, ec:1.1.99.14 - dehydrogenase, ec:2.1.2.1 - hydroxymethyltransferase, ec:1.1.1.81 - reductase, ec:6.3.1.2 - synthetase, ec:2.6.1.45 - tran…
Mj_1_GCCAAT_L005_R1_001_(paired)_trimmed_(paired)_contig_77338	Fatty acid biosynthesis	map00061	12	ec:6.2.1.3 - ligase, ec:2.3.1.85 - synthase system, ec:6.4.1.2 - carboxylase, ec:3.1.2.14 - hydrolase, ec:4.2.1.59 - dehydratase, ec:2.3.1.86 - synthase system, ec:2.3.1.180 - synthase III, ec:2.3.1.39 - S-malonyltransferase, ec:2.3.1.41 - synthase I, ec:1.1.1.100 - reductase, ec:1.14.19.2 - 9-desaturase, ec:1.3.1.9 - reductase (NADH)
TR60976|c0_g1_i3	Peptidoglycan biosynthesis, N-Glycan biosynthesis	map00550, map00510	5, 18	ec:2.7.8.13 - MraY transferase, ec:2.4.1.227 - beta-N-acetylglucosaminyltransferase, ec:6.3.2.13 - ligase, ec:2.5.1.31 - synthase [(2E,6E)-farnesyl-diphosphate specific], ec:6.3.2.4 - ligase, ec:2.4.1.101 - 2-beta-N-acetylglucosaminyltransferase, ec:2.4.1.117 - beta-glucosyltransferase, ec:2.4.1.259 - alpha-1,2-mannosyltransferase, ec:2.4.1.131 - alpha-1,2-mannosyltransferase, ec:2.4.1.144 - 4-be…
TR65719|c0_g1_i3	Folate biosynthesis, Caprolactam degradation, Glycerolipid metabolism, Arachidonic acid metabolism, Metabolism of xenobiotics by cytochrome P450, Monoterpenoid biosynthesis, Pentose and glucuronate interconversions, Glycolysis / Gluconeogenesis	map00790, map00930, map00561, map00590, map00980, map00902, map00040, map00010	17, 8, 24, 9, 8, 6, 20, 28	ec:3.4.19.9 - gamma-glutamyl hydrolase, ec:2.5.1.15 - synthase, ec:1.1.1.21 - reductase, ec:6.3.2.12 - synthase, ec:2.10.1.1 - molybdotransferase, ec:4.2.1.96 - dehydratase, ec:3.5.4.25 - cyclohydrolase II, ec:3.5.4.16 - cyclohydrolase I, ec:6.3.2.17 - synthase, ec:2.7.6.3 - diphosphokinase, ec:2.6.1.85 - synthase, ec:1.1.1.184 - reductase (NADPH), ec:2.7.7.75 - adenylyltransferase, ec:4.1.2.25 -…
TR62249|c0_g1_i1	Drug metabolism - other enzymes, Pyrimidine metabolism	map00983, map00240	19, 31	ec:2.7.1.48 - kinase, ec:3.5.2.2 - hydantoinase, ec:3.1.1.1 - ali-esterase, ec:1.17.4.1 - reductase, ec:1.3.1.2 - dehydrogenase (NADP+), ec:3.5.1.6 - N-carbamoyl-beta-alanine amidohydrolase, ec:3.2.1.31 - beta-glucuronide glucuronohydrolase glucuronidase, ec:3.5.4.5 - deaminase, ec:1.17.3.2 - oxidase, ec:2.7.4.14 - kinase, ec:1.1.1.205 - dehydrogenase, ec:2.4.2.10 - phosphoribosyltransferase, ec:…
TR64640|c2_g1_i20	Drug metabolism - other enzymes, Purine metabolism, Pyrimidine metabolism	map00983, map00230, map00240	19, 60, 31	ec:2.7.1.48 - kinase, ec:3.5.2.2 - hydantoinase, ec:3.1.1.1 - ali-esterase, ec:1.17.4.1 - reductase, ec:1.3.1.2 - dehydrogenase (NADP+), ec:3.5.1.6 - N-carbamoyl-beta-alanine amidohydrolase, ec:3.2.1.31 - beta-glucuronide glucuronohydrolase glucuronidase, ec:3.5.4.5 - deaminase, ec:1.17.3.2 - oxidase, ec:2.7.4.14 - kinase, ec:1.1.1.205 - dehydrogenase, ec:2.4.2.10 - phosphoribosyltransferase, ec:…
Mj_1_GCCAAT_L005_R1_001_(paired)_trimmed_(paired)_contig_90325	Arginine and proline metabolism	map00330	28	ec:1.2.1.3 - dehydrogenase (NAD+), ec:1.5.3.17 - polyamine oxidase, ec:1.2.1.41 - dehydrogenase, ec:3.5.3.12 - deiminase, ec:2.3.1.64 - N4-coumaroyltransferase, ec:2.7.3.3 - kinase, ec:1.14.11.2 - 4-dioxygenase, ec:4.1.1.50 - decarboxylase, ec:3.5.1.59 - amidase, ec:4.1.1.19 - decarboxylase, ec:2.6.1.1 - transaminase, ec:2.5.1.16 - synthase, ec:2.1.1.2 - N-methyltransferase, ec:1.5.1.19 - dehydro…
Mj_1_GCCAAT_L005_R1_001_(paired)_trimmed_(paired)_contig_92989	Pyruvate metabolism, Glyoxylate and dicarboxylate metabolism	map00620, map00630	33, 34	ec:4.1.1.32 - carboxykinase (GTP), ec:1.2.1.3 - dehydrogenase (NAD+), ec:1.1.1.79 - reductase (NADP+), ec:4.1.1.49 - carboxykinase (ATP), ec:2.3.1.12 - acetyltransferase, ec:1.1.2.3 - dehydrogenase (cytochrome), ec:1.1.1.37 - dehydrogenase, ec:1.1.1.28 - dehydrogenase, ec:3.1.2.1 - hydrolase, ec:2.7.9.1 - phosphate dikinase, ec:6.4.1.2 - carboxylase, ec:1.1.2.4 - dehydrogenase (cytochrome), ec:3.…
TR64640|c2_g1_i21	Drug metabolism - other enzymes, Purine metabolism, Pyrimidine metabolism	map00983, map00230, map00240	19, 60, 31	ec:2.7.1.48 - kinase, ec:3.5.2.2 - hydantoinase, ec:3.1.1.1 - ali-esterase, ec:1.17.4.1 - reductase, ec:1.3.1.2 - dehydrogenase (NADP+), ec:3.5.1.6 - N-carbamoyl-beta-alanine amidohydrolase, ec:3.2.1.31 - beta-glucuronide glucuronohydrolase glucuronidase, ec:3.5.4.5 - deaminase, ec:1.17.3.2 - oxidase, ec:2.7.4.14 - kinase, ec:1.1.1.205 - dehydrogenase, ec:2.4.2.10 - phosphoribosyltransferase, ec:…
Mj_1_GCCAAT_L005_R1_001_(paired)_trimmed_(paired)_contig_91658	Carbon fixation in photosynthetic organisms, Pentose phosphate pathway, Fructose and mannose metabolism, Methane metabolism, Glycolysis / Gluconeogenesis	map00710, map00030, map00051, map00680, map00010	22, 21, 27, 23, 28	ec:5.1.3.1 - 3-epimerase, ec:4.1.1.49 - carboxykinase (ATP), ec:2.7.2.3 - kinase, ec:1.1.1.37 - dehydrogenase, ec:5.3.1.1 - isomerase, ec:2.7.9.1 - phosphate dikinase, ec:2.6.1.1 - transaminase, ec:1.2.1.12 - dehydrogenase (phosphorylating), ec:3.1.3.11 - hexose diphosphatase, ec:5.3.1.6 - isomerase, ec:2.2.1.1 - glycolaldehydetransferase, ec:4.1.2.13 - aldolase, ec:1.1.1.82 - dehydrogenase (NADP…
TR22385|c0_g1_i1	Aminoacyl-tRNA biosynthesis, Selenocompound metabolism	map00970, map00450	23, 10	ec:6.1.1.22 - ligase, ec:6.1.1.3 - ligase, ec:6.1.1.10 - ligase, ec:6.1.1.18 - ligase, ec:6.1.1.7 - ligase, ec:6.1.1.23 - ligase, ec:6.1.1.14 - ligase, ec:6.1.1.4 - ligase, ec:6.1.1.20 - ligase, ec:6.1.1.11 - ligase, ec:6.1.1.1 - ligase, ec:6.1.1.19 - ligase, ec:2.1.2.9 - formyltransferase, ec:6.1.1.9 - ligase, ec:6.1.1.15 - ligase, ec:6.1.1.5 - ligase, ec:6.1.1.21 - ligase, ec:6.1.1.12 - ligase,…
Mj_1_GCCAAT_L005_R1_001_(paired)_trimmed_(paired)_contig_16210	Purine metabolism, Pyrimidine metabolism	map00230, map00240	60, 31	ec:3.6.1.15 - phosphatase, ec:4.6.1.2 - cyclase, ec:3.2.2.7 - nucleosidase, ec:3.6.1.9 - diphosphatase, ec:1.17.4.1 - reductase, ec:2.7.4.10 - kinase, ec:6.3.3.1 - cyclo-ligase, ec:1.7.3.3 - urate hydroxylase, ec:3.1.3.5 - uridine 5'-nucleotidase, ec:2.7.1.74 - kinase, ec:6.3.2.6 - synthase, ec:3.5.3.9 - deiminase, ec:3.2.2.1 - nucleosidase, ec:1.17.3.2 - oxidase, ec:2.7.4.3 - kinase, ec:3.5.2.17…
TR28967|c0_g1_i1	T cell receptor signaling pathway	map04660	2	ec:2.7.10.2 - protein-tyrosine kinase, ec:3.1.3.16 - phosphatase
Mj_1_GCCAAT_L005_R1_001_(paired)_trimmed_(paired)_contig_18872	Phenylalanine, tyrosine and tryptophan biosynthesis	map00400	27	ec:1.1.1.24 - dehydrogenase, ec:4.1.1.48 - synthase, ec:2.6.1.57 - transaminase, ec:1.1.1.282 - dehydrogenase, ec:4.1.3.27 - synthase, ec:2.6.1.5 - transaminase, ec:2.6.1.79 - aminotransferase, ec:2.5.1.19 - 1-carboxyvinyltransferase, ec:1.3.1.12 - dehydrogenase, ec:4.2.3.5 - synthase, ec:2.6.1.1 - transaminase, ec:1.1.1.25 - dehydrogenase, ec:2.5.1.54 - synthase, ec:2.7.1.71 - kinase, ec:2.6.1.9…
TR69984|c0_g1_i3	Pyruvate metabolism, Glycine, serine and threonine metabolism, Glyoxylate and dicarboxylate metabolism	map00620, map00260, map00630	33, 39, 34	ec:4.1.1.32 - carboxykinase (GTP), ec:1.2.1.3 - dehydrogenase (NAD+), ec:1.1.1.79 - reductase (NADP+), ec:4.1.1.49 - carboxykinase (ATP), ec:2.3.1.12 - acetyltransferase, ec:1.1.2.3 - dehydrogenase (cytochrome), ec:1.1.1.37 - dehydrogenase, ec:1.1.1.28 - dehydrogenase, ec:3.1.2.1 - hydrolase, ec:2.7.9.1 - phosphate dikinase, ec:6.4.1.2 - carboxylase, ec:1.1.2.4 - dehydrogenase (cytochrome), ec:3.…
Mj_1_GCCAAT_L005_R1_001_(paired)_trimmed_(paired)_contig_41391	T cell receptor signaling pathway	map04660	2	ec:2.7.10.2 - protein-tyrosine kinase, ec:3.1.3.16 - phosphatase
Mj_1_GCCAAT_L005_R1_001_(paired)_trimmed_(paired)_contig_88000	T cell receptor signaling pathway, Th1 and Th2 cell differentiation, PD-L1 expression and PD-1 checkpoint pathway in cancer	map04660, map04658, map05235	2, 1, 1	ec:2.7.10.2 - protein-tyrosine kinase, ec:3.1.3.16 - phosphatase, ec:3.1.3.16 - phosphatase, ec:3.1.3.16 - phosphatase
Mj_1_GCCAAT_L005_R1_001_(paired)_trimmed_(paired)_contig_90329	alpha-Linolenic acid metabolism, Linoleic acid metabolism	map00592, map00591	11, 3	ec:4.2.1.92 - dehydratase, ec:1.3.3.6 - oxidase, ec:2.3.1.16 - C-acyltransferase, ec:3.1.1.32 - A1, ec:1.3.1.42 - reductase, ec:1.1.1.1 - dehydrogenase, ec:1.13.11.12 - 13S-lipoxygenase, ec:5.3.99.6 - cyclase, ec:4.2.1.17 - hydratase, ec:2.1.1.141 - O-methyltransferase, ec:3.1.1.4 - A2, ec:1.14.14.1 - monooxygenase, ec:1.13.11.12 - 13S-lipoxygenase, ec:3.1.1.4 - A2
TR23374|c0_g1_i1	Pyruvate metabolism, Histidine metabolism, Chloroalkane and chloroalkene degradation, Ascorbate and aldarate metabolism, Lysine degradation, Fatty acid degradation, Arginine and proline metabolism, Limonene and pinene degradation, Tryptophan metabolism, Glycerolipid metabolism, beta-Alanine metabolism, Valine, leucine and isoleucine degradation, Glycolysis / Gluconeogenesis, Insect hormone biosyn…	map00620, map00340, map00625, map00053, map00310, map00071, map00330, map00903, map00380, map00561, map00410, map00280, map00010, map00981	33, 13, 5, 18, 12, 14, 28, 2, 29, 24, 17, 21, 28, 2	ec:4.1.1.32 - carboxykinase (GTP), ec:1.2.1.3 - dehydrogenase (NAD+), ec:1.1.1.79 - reductase (NADP+), ec:4.1.1.49 - carboxykinase (ATP), ec:2.3.1.12 - acetyltransferase, ec:1.1.2.3 - dehydrogenase (cytochrome), ec:1.1.1.37 - dehydrogenase, ec:1.1.1.28 - dehydrogenase, ec:3.1.2.1 - hydrolase, ec:2.7.9.1 - phosphate dikinase, ec:6.4.1.2 - carboxylase, ec:1.1.2.4 - dehydrogenase (cytochrome), ec:3.…
Mj_1_GCCAAT_L005_R1_001_(paired)_trimmed_(paired)_contig_52043	Other glycan degradation	map00511	8	ec:3.2.1.23 - lactase (ambiguous), ec:3.5.1.26 - aspartylglucosylamine deaspartylase, ec:3.2.1.96 - endo-beta-N-acetylglucosaminidase, ec:3.2.1.24 - alpha-D-mannosidase, ec:3.2.1.45 - psychosine hydrolase, ec:3.2.1.51 - alpha-fucosidase, ec:3.2.1.25 - mannanase, ec:3.2.1.52 - hexosaminidase
TR77699|c3_g1_i1	T cell receptor signaling pathway	map04660	2	ec:2.7.10.2 - protein-tyrosine kinase, ec:3.1.3.16 - phosphatase
TR75803|c1_g1_i1	Isoquinoline alkaloid biosynthesis	map00950	17	ec:2.6.1.57 - transaminase, ec:2.1.1.128 - 6-O-methyltransferase, ec:2.6.1.5 - transaminase, ec:4.1.1.28 - decarboxylase, ec:1.1.1.247 - reductase (NADPH), ec:2.6.1.1 - transaminase, ec:2.1.1.116 - 4'-O-methyltransferase, ec:4.1.1.25 - decarboxylase, ec:1.4.3.2 - oxidase, ec:1.14.18.1 - monophenol monooxygenase, ec:1.21.3.3 - oxidase, ec:2.3.1.150 - 7-O-acetyltransferase, ec:1.1.1.248 - reductase…
TR58132|c0_g1_i3	Glycerophospholipid metabolism	map00564	33	ec:3.1.4.4 - D, ec:3.1.1.52 - deacylase, ec:2.3.1.51 - O-acyltransferase, ec:2.7.8.5 - 1-phosphatidyltransferase, ec:2.1.1.17 - N-methyltransferase, ec:1.1.1.8 - dehydrogenase (NAD+), ec:2.7.8.1 - EPT, ec:2.1.1.103 - N-methyltransferase, ec:2.7.1.107 - kinase (ATP), ec:3.1.1.32 - A1, ec:3.6.1.16 - diphosphatase, ec:2.7.1.32 - kinase, ec:3.1.3.75 - phosphatase, ec:1.1.1.94 - dehydrogenase [NAD(P)+…
TR64640|c2_g1_i14	Drug metabolism - other enzymes, Purine metabolism, Pyrimidine metabolism	map00983, map00230, map00240	19, 60, 31	ec:2.7.1.48 - kinase, ec:3.5.2.2 - hydantoinase, ec:3.1.1.1 - ali-esterase, ec:1.17.4.1 - reductase, ec:1.3.1.2 - dehydrogenase (NADP+), ec:3.5.1.6 - N-carbamoyl-beta-alanine amidohydrolase, ec:3.2.1.31 - beta-glucuronide glucuronohydrolase glucuronidase, ec:3.5.4.5 - deaminase, ec:1.17.3.2 - oxidase, ec:2.7.4.14 - kinase, ec:1.1.1.205 - dehydrogenase, ec:2.4.2.10 - phosphoribosyltransferase, ec:…
TR67374|c0_g1_i2	Purine metabolism	map00230	60	ec:3.6.1.15 - phosphatase, ec:4.6.1.2 - cyclase, ec:3.2.2.7 - nucleosidase, ec:3.6.1.9 - diphosphatase, ec:1.17.4.1 - reductase, ec:2.7.4.10 - kinase, ec:6.3.3.1 - cyclo-ligase, ec:1.7.3.3 - urate hydroxylase, ec:3.1.3.5 - uridine 5'-nucleotidase, ec:2.7.1.74 - kinase, ec:6.3.2.6 - synthase, ec:3.5.3.9 - deiminase, ec:3.2.2.1 - nucleosidase, ec:1.17.3.2 - oxidase, ec:2.7.4.3 - kinase, ec:3.5.2.17…
TR72659|c1_g1_i1	alpha-Linolenic acid metabolism	map00592	11	ec:4.2.1.92 - dehydratase, ec:1.3.3.6 - oxidase, ec:2.3.1.16 - C-acyltransferase, ec:3.1.1.32 - A1, ec:1.3.1.42 - reductase, ec:1.1.1.1 - dehydrogenase, ec:1.13.11.12 - 13S-lipoxygenase, ec:5.3.99.6 - cyclase, ec:4.2.1.17 - hydratase, ec:2.1.1.141 - O-methyltransferase, ec:3.1.1.4 - A2
TR67374|c0_g1_i1	Purine metabolism	map00230	60	ec:3.6.1.15 - phosphatase, ec:4.6.1.2 - cyclase, ec:3.2.2.7 - nucleosidase, ec:3.6.1.9 - diphosphatase, ec:1.17.4.1 - reductase, ec:2.7.4.10 - kinase, ec:6.3.3.1 - cyclo-ligase, ec:1.7.3.3 - urate hydroxylase, ec:3.1.3.5 - uridine 5'-nucleotidase, ec:2.7.1.74 - kinase, ec:6.3.2.6 - synthase, ec:3.5.3.9 - deiminase, ec:3.2.2.1 - nucleosidase, ec:1.17.3.2 - oxidase, ec:2.7.4.3 - kinase, ec:3.5.2.17…
Mj_1_GCCAAT_L005_R1_001_(paired)_trimmed_(paired)_contig_92954	Alanine, aspartate and glutamate metabolism, Glycine, serine and threonine metabolism, Cysteine and methionine metabolism	map00250, map00260, map00270	29, 39, 45	ec:1.4.1.14 - synthase (NADH), ec:4.1.1.15 - decarboxylase, ec:6.3.4.5 - synthase, ec:1.4.1.2 - dehydrogenase, ec:1.2.1.24 - dehydrogenase (NAD+), ec:6.3.1.2 - synthetase, ec:3.5.1.3 - alpha-keto acid-omega-amidase, ec:1.2.1.16 - dehydrogenase [NAD(P)+], ec:6.3.4.16 - synthase (ammonia), ec:6.3.5.5 - synthase (glutamine-hydrolysing), ec:2.6.1.1 - transaminase, ec:4.3.2.1 - lyase, ec:1.4.3.2 - oxi…
TR73283|c2_g3_i2	Amino sugar and nucleotide sugar metabolism, Fructose and mannose metabolism	map00520, map00051	46, 27	ec:5.1.3.2 - 4-epimerase, ec:2.4.2.24 - synthase, ec:2.7.7.9 - uridylyltransferase, ec:2.7.1.7 - mannokinase (phosphorylating), ec:5.4.2.8 - mannose phosphomutase, ec:2.7.1.44 - galacturonokinase (phosphorylating) D-galacturonic acid kinase, ec:2.7.7.22 - guanylyltransferase (GDP), ec:5.1.3.6 - 4-epimerase, ec:3.2.1.14 - ChiC, ec:2.7.7.13 - guanylyltransferase, ec:5.1.3.12 - 5'-epimerase, ec:2.7.…
TR78605|c0_g1_i5	Thiamine metabolism, Riboflavin metabolism	map00730, map00740	12, 12	ec:3.6.1.15 - phosphatase, ec:2.7.4.7 - kinase, ec:2.8.1.7 - desulfurase, ec:2.7.6.2 - diphosphokinase, ec:2.7.1.50 - kinase, ec:2.7.4.3 - kinase, ec:2.7.1.49 - kinase, ec:3.5.99.2 - aminohydrolase, ec:2.5.1.3 - phosphate synthase, ec:3.1.3.2 - phosphatase, ec:4.1.99.19 - synthase, ec:2.2.1.7 - synthase, ec:3.6.1.9 - diphosphatase, ec:3.5.4.25 - cyclohydrolase II, ec:2.7.7.2 - synthase, ec:1.5.1.…
C876041	Porphyrin and chlorophyll metabolism	map00860	31	ec:2.3.1.37 - synthase, ec:3.1.1.14 - CLH, ec:1.3.7.4 - oxidoreductase, ec:4.99.1.4 - ferrochelatase, ec:4.2.1.75 - synthase, ec:3.2.1.31 - beta-glucuronide glucuronohydrolase glucuronidase, ec:4.1.1.37 - decarboxylase, ec:1.3.1.75 - protochlorophyllide a 8-vinyl-reductase (NADPH), ec:4.2.1.24 - synthase, ec:5.4.3.8 - 2,1-aminomutase, ec:1.3.1.33 - reductase, ec:2.1.1.107 - C-methyltransferase, e…
TR79337|c0_g3_i3	Glycerophospholipid metabolism	map00564	33	ec:3.1.4.4 - D, ec:3.1.1.52 - deacylase, ec:2.3.1.51 - O-acyltransferase, ec:2.7.8.5 - 1-phosphatidyltransferase, ec:2.1.1.17 - N-methyltransferase, ec:1.1.1.8 - dehydrogenase (NAD+), ec:2.7.8.1 - EPT, ec:2.1.1.103 - N-methyltransferase, ec:2.7.1.107 - kinase (ATP), ec:3.1.1.32 - A1, ec:3.6.1.16 - diphosphatase, ec:2.7.1.32 - kinase, ec:3.1.3.75 - phosphatase, ec:1.1.1.94 - dehydrogenase [NAD(P)+…
TR79337|c0_g3_i5	Glycerophospholipid metabolism	map00564	33	ec:3.1.4.4 - D, ec:3.1.1.52 - deacylase, ec:2.3.1.51 - O-acyltransferase, ec:2.7.8.5 - 1-phosphatidyltransferase, ec:2.1.1.17 - N-methyltransferase, ec:1.1.1.8 - dehydrogenase (NAD+), ec:2.7.8.1 - EPT, ec:2.1.1.103 - N-methyltransferase, ec:2.7.1.107 - kinase (ATP), ec:3.1.1.32 - A1, ec:3.6.1.16 - diphosphatase, ec:2.7.1.32 - kinase, ec:3.1.3.75 - phosphatase, ec:1.1.1.94 - dehydrogenase [NAD(P)+…
TR78194|c0_g1_i2	Steroid hormone biosynthesis, Linoleic acid metabolism, Retinol metabolism, Fatty acid degradation, Arachidonic acid metabolism, Caffeine metabolism, Metabolism of xenobiotics by cytochrome P450, Drug metabolism - cytochrome P450, Aminobenzoate degradation, Tryptophan metabolism	map00140, map00591, map00830, map00071, map00590, map00232, map00980, map00982, map00627, map00380	12, 3, 6, 14, 9, 3, 8, 7, 11, 29	ec:1.1.1.51 - 17)beta-hydroxysteroid dehydrogenase, ec:1.14.14.1 - monooxygenase, ec:1.3.1.3 - 5beta-reductase, ec:2.1.1.6 - O-methyltransferase, ec:1.1.1.145 - dehydrogenase, ec:1.1.1.62 - 17-dehydrogenase, ec:2.4.1.17 - 1-naphthol glucuronyltransferase, ec:1.1.1.53 - 20beta)-hydroxysteroid dehydrogenase, ec:1.1.1.149 - dehydrogenase, ec:1.3.1.22 - 4-dehydrogenase (NADP+), ec:1.1.1.146 - dehydro…
TR79337|c0_g3_i6	Glycerophospholipid metabolism	map00564	33	ec:3.1.4.4 - D, ec:3.1.1.52 - deacylase, ec:2.3.1.51 - O-acyltransferase, ec:2.7.8.5 - 1-phosphatidyltransferase, ec:2.1.1.17 - N-methyltransferase, ec:1.1.1.8 - dehydrogenase (NAD+), ec:2.7.8.1 - EPT, ec:2.1.1.103 - N-methyltransferase, ec:2.7.1.107 - kinase (ATP), ec:3.1.1.32 - A1, ec:3.6.1.16 - diphosphatase, ec:2.7.1.32 - kinase, ec:3.1.3.75 - phosphatase, ec:1.1.1.94 - dehydrogenase [NAD(P)+…
TR79337|c0_g3_i9	Glycerophospholipid metabolism	map00564	33	ec:3.1.4.4 - D, ec:3.1.1.52 - deacylase, ec:2.3.1.51 - O-acyltransferase, ec:2.7.8.5 - 1-phosphatidyltransferase, ec:2.1.1.17 - N-methyltransferase, ec:1.1.1.8 - dehydrogenase (NAD+), ec:2.7.8.1 - EPT, ec:2.1.1.103 - N-methyltransferase, ec:2.7.1.107 - kinase (ATP), ec:3.1.1.32 - A1, ec:3.6.1.16 - diphosphatase, ec:2.7.1.32 - kinase, ec:3.1.3.75 - phosphatase, ec:1.1.1.94 - dehydrogenase [NAD(P)+…
C769656	Biosynthesis of unsaturated fatty acids	map01040	6	ec:1.3.3.6 - oxidase, ec:2.3.1.16 - C-acyltransferase, ec:3.1.2.2 - hydrolase, ec:1.14.19.1 - 9-desaturase, ec:1.14.19.2 - 9-desaturase, ec:2.3.1.176 - C-acyltransferase
TR95286|c0_g1_i1	Methane metabolism	map00680	23	ec:2.2.1.3 - transketolase, ec:4.4.1.22 - synthase, ec:4.2.1.11 - hydratase, ec:1.1.1.37 - dehydrogenase, ec:2.1.2.1 - hydroxymethyltransferase, ec:2.7.1.11 - phosphohexokinase, ec:2.6.1.45 - transaminase, ec:1.2.1.46 - dehydrogenase, ec:4.1.1.25 - decarboxylase, ec:3.1.3.11 - hexose diphosphatase, ec:1.1.3.13 - oxidase, ec:4.1.2.13 - aldolase, ec:1.1.1.29 - dehydrogenase, ec:6.2.1.1 - ligase, ec…
TR48845|c0_g1_i1	Glycosaminoglycan biosynthesis - heparan sulfate / heparin	map00534	5	ec:2.4.1.135 - 3-beta-glucuronosyltransferase, ec:2.4.1.223 - 4-alpha-N-acetylglucosaminyltransferase, ec:2.4.2.26 - xylosyltransferase, ec:2.4.1.224 - 4-alpha-N-acetylglucosaminyltransferase, ec:2.4.1.134 - 3-beta-galactosyltransferase
Mj_1_GCCAAT_L005_R1_001_(paired)_trimmed_(paired)_contig_76028	Glycosphingolipid biosynthesis - lacto and neolacto series, Glycosphingolipid biosynthesis - globo and isoglobo series	map00601, map00603	5, 6	ec:2.4.99.4 - alpha-2,3-sialyltransferase, ec:2.4.1.152 - 3-alpha-L-fucosyltransferase, ec:2.4.1.65 - 4-alpha-L-fucosyltransferase, ec:2.4.1.228 - 4-alpha-galactosyltransferase, ec:2.4.1.69 - 1 galactoside alpha-(1,2)-fucosyltransferase, ec:2.4.99.4 - alpha-2,3-sialyltransferase, ec:2.4.1.152 - 3-alpha-L-fucosyltransferase, ec:3.2.1.22 - melibiase, ec:2.4.1.228 - 4-alpha-galactosyltransferase, ec…
TR79337|c0_g3_i2	Glycerophospholipid metabolism	map00564	33	ec:3.1.4.4 - D, ec:3.1.1.52 - deacylase, ec:2.3.1.51 - O-acyltransferase, ec:2.7.8.5 - 1-phosphatidyltransferase, ec:2.1.1.17 - N-methyltransferase, ec:1.1.1.8 - dehydrogenase (NAD+), ec:2.7.8.1 - EPT, ec:2.1.1.103 - N-methyltransferase, ec:2.7.1.107 - kinase (ATP), ec:3.1.1.32 - A1, ec:3.6.1.16 - diphosphatase, ec:2.7.1.32 - kinase, ec:3.1.3.75 - phosphatase, ec:1.1.1.94 - dehydrogenase [NAD(P)+…
TR112160|c0_g1_i1	Cysteine and methionine metabolism	map00270	45	ec:1.13.11.53 - dioxygenase (Ni2+-requiring), ec:1.2.1.11 - dehydrogenase, ec:1.13.11.20 - dioxygenase, ec:4.4.1.14 - synthase, ec:2.6.1.57 - transaminase, ec:1.1.1.37 - dehydrogenase, ec:1.14.17.4 - oxidase, ec:2.6.1.5 - transaminase, ec:4.1.1.50 - decarboxylase, ec:2.1.1.13 - synthase, ec:2.5.1.49 - aminocarboxypropyltransferase, ec:2.3.1.30 - O-acetyltransferase, ec:2.1.1.5 - S-methyltransfera…
TR70048|c0_g1_i3	Pyruvate metabolism, Glycine, serine and threonine metabolism, Glyoxylate and dicarboxylate metabolism	map00620, map00260, map00630	33, 39, 34	ec:4.1.1.32 - carboxykinase (GTP), ec:1.2.1.3 - dehydrogenase (NAD+), ec:1.1.1.79 - reductase (NADP+), ec:4.1.1.49 - carboxykinase (ATP), ec:2.3.1.12 - acetyltransferase, ec:1.1.2.3 - dehydrogenase (cytochrome), ec:1.1.1.37 - dehydrogenase, ec:1.1.1.28 - dehydrogenase, ec:3.1.2.1 - hydrolase, ec:2.7.9.1 - phosphate dikinase, ec:6.4.1.2 - carboxylase, ec:1.1.2.4 - dehydrogenase (cytochrome), ec:3.…
TR78605|c0_g1_i7	Thiamine metabolism, Riboflavin metabolism	map00730, map00740	12, 12	ec:3.6.1.15 - phosphatase, ec:2.7.4.7 - kinase, ec:2.8.1.7 - desulfurase, ec:2.7.6.2 - diphosphokinase, ec:2.7.1.50 - kinase, ec:2.7.4.3 - kinase, ec:2.7.1.49 - kinase, ec:3.5.99.2 - aminohydrolase, ec:2.5.1.3 - phosphate synthase, ec:3.1.3.2 - phosphatase, ec:4.1.99.19 - synthase, ec:2.2.1.7 - synthase, ec:3.6.1.9 - diphosphatase, ec:3.5.4.25 - cyclohydrolase II, ec:2.7.7.2 - synthase, ec:1.5.1.…
Mj_1_GCCAAT_L005_R1_001_(paired)_trimmed_(paired)_contig_39097	Purine metabolism	map00230	60	ec:3.6.1.15 - phosphatase, ec:4.6.1.2 - cyclase, ec:3.2.2.7 - nucleosidase, ec:3.6.1.9 - diphosphatase, ec:1.17.4.1 - reductase, ec:2.7.4.10 - kinase, ec:6.3.3.1 - cyclo-ligase, ec:1.7.3.3 - urate hydroxylase, ec:3.1.3.5 - uridine 5'-nucleotidase, ec:2.7.1.74 - kinase, ec:6.3.2.6 - synthase, ec:3.5.3.9 - deiminase, ec:3.2.2.1 - nucleosidase, ec:1.17.3.2 - oxidase, ec:2.7.4.3 - kinase, ec:3.5.2.17…
TR78605|c0_g1_i8	Thiamine metabolism, Riboflavin metabolism	map00730, map00740	12, 12	ec:3.6.1.15 - phosphatase, ec:2.7.4.7 - kinase, ec:2.8.1.7 - desulfurase, ec:2.7.6.2 - diphosphokinase, ec:2.7.1.50 - kinase, ec:2.7.4.3 - kinase, ec:2.7.1.49 - kinase, ec:3.5.99.2 - aminohydrolase, ec:2.5.1.3 - phosphate synthase, ec:3.1.3.2 - phosphatase, ec:4.1.99.19 - synthase, ec:2.2.1.7 - synthase, ec:3.6.1.9 - diphosphatase, ec:3.5.4.25 - cyclohydrolase II, ec:2.7.7.2 - synthase, ec:1.5.1.…
TR78605|c0_g1_i9	Aminobenzoate degradation	map00627	11	ec:1.2.1.28 - dehydrogenase (NAD+), ec:3.5.5.1 - acetonitrilase, ec:1.6.5.7 - reductase, ec:1.14.14.1 - monooxygenase, ec:4.2.1.84 - hydratase, ec:3.1.3.41 - nitrophenyl phosphatase, ec:3.6.1.7 - acetylphosphatase, ec:3.5.1.4 - acylamidase, ec:1.14.13.82 - monooxygenase, ec:2.8.3.8 - CoA-transferase, ec:4.2.1.17 - hydratase
TR56466|c1_g1_i1	Amino sugar and nucleotide sugar metabolism	map00520	46	ec:5.1.3.2 - 4-epimerase, ec:2.4.2.24 - synthase, ec:2.7.7.9 - uridylyltransferase, ec:2.7.1.7 - mannokinase (phosphorylating), ec:5.4.2.8 - mannose phosphomutase, ec:2.7.1.44 - galacturonokinase (phosphorylating) D-galacturonic acid kinase, ec:2.7.7.22 - guanylyltransferase (GDP), ec:5.1.3.6 - 4-epimerase, ec:3.2.1.14 - ChiC, ec:2.7.7.13 - guanylyltransferase, ec:5.1.3.12 - 5'-epimerase, ec:2.7.…
TR75987|c1_g1_i1	Isoquinoline alkaloid biosynthesis	map00950	17	ec:2.6.1.57 - transaminase, ec:2.1.1.128 - 6-O-methyltransferase, ec:2.6.1.5 - transaminase, ec:4.1.1.28 - decarboxylase, ec:1.1.1.247 - reductase (NADPH), ec:2.6.1.1 - transaminase, ec:2.1.1.116 - 4'-O-methyltransferase, ec:4.1.1.25 - decarboxylase, ec:1.4.3.2 - oxidase, ec:1.14.18.1 - monophenol monooxygenase, ec:1.21.3.3 - oxidase, ec:2.3.1.150 - 7-O-acetyltransferase, ec:1.1.1.248 - reductase…
TR70048|c0_g1_i1	Pyruvate metabolism, Glycine, serine and threonine metabolism, Glyoxylate and dicarboxylate metabolism	map00620, map00260, map00630	33, 39, 34	ec:4.1.1.32 - carboxykinase (GTP), ec:1.2.1.3 - dehydrogenase (NAD+), ec:1.1.1.79 - reductase (NADP+), ec:4.1.1.49 - carboxykinase (ATP), ec:2.3.1.12 - acetyltransferase, ec:1.1.2.3 - dehydrogenase (cytochrome), ec:1.1.1.37 - dehydrogenase, ec:1.1.1.28 - dehydrogenase, ec:3.1.2.1 - hydrolase, ec:2.7.9.1 - phosphate dikinase, ec:6.4.1.2 - carboxylase, ec:1.1.2.4 - dehydrogenase (cytochrome), ec:3.…
Mj_1_GCCAAT_L005_R1_001_(paired)_trimmed_(paired)_contig_17523	Arginine and proline metabolism	map00330	28	ec:1.2.1.3 - dehydrogenase (NAD+), ec:1.5.3.17 - polyamine oxidase, ec:1.2.1.41 - dehydrogenase, ec:3.5.3.12 - deiminase, ec:2.3.1.64 - N4-coumaroyltransferase, ec:2.7.3.3 - kinase, ec:1.14.11.2 - 4-dioxygenase, ec:4.1.1.50 - decarboxylase, ec:3.5.1.59 - amidase, ec:4.1.1.19 - decarboxylase, ec:2.6.1.1 - transaminase, ec:2.5.1.16 - synthase, ec:2.1.1.2 - N-methyltransferase, ec:1.5.1.19 - dehydro…
Mj_1_GCCAAT_L005_R1_001_(paired)_trimmed_(paired)_contig_66699	Retinol metabolism, Phenylpropanoid biosynthesis	map00830, map00940	6, 17	ec:1.2.1.36 - dehydrogenase, ec:1.14.14.1 - monooxygenase, ec:1.1.1.1 - dehydrogenase, ec:1.2.3.1 - oxidase, ec:2.4.1.17 - 1-naphthol glucuronyltransferase, ec:1.3.99.23 - 13,14-reductase, ec:3.2.1.126 - beta-glucosidase, ec:1.1.1.195 - dehydrogenase, ec:1.11.1.7 - lactoperoxidase, ec:2.1.1.146 - O-methyltransferase, ec:1.2.1.68 - dehydrogenase, ec:4.3.1.24 - ammonia-lyase, ec:2.1.1.104 - O-methy…
Mj_1_GCCAAT_L005_R1_001_(paired)_trimmed_(paired)_contig_92965	Phenylalanine, tyrosine and tryptophan biosynthesis	map00400	27	ec:1.1.1.24 - dehydrogenase, ec:4.1.1.48 - synthase, ec:2.6.1.57 - transaminase, ec:1.1.1.282 - dehydrogenase, ec:4.1.3.27 - synthase, ec:2.6.1.5 - transaminase, ec:2.6.1.79 - aminotransferase, ec:2.5.1.19 - 1-carboxyvinyltransferase, ec:1.3.1.12 - dehydrogenase, ec:4.2.3.5 - synthase, ec:2.6.1.1 - transaminase, ec:1.1.1.25 - dehydrogenase, ec:2.5.1.54 - synthase, ec:2.7.1.71 - kinase, ec:2.6.1.9…
Mj_1_GCCAAT_L005_R1_001_(paired)_trimmed_(paired)_contig_91635	Drug metabolism - cytochrome P450	map00982	7	ec:1.14.14.1 - monooxygenase, ec:1.1.1.1 - dehydrogenase, ec:1.2.1.5 - dehydrogenase [NAD(P)+], ec:1.2.3.1 - oxidase, ec:2.4.1.17 - 1-naphthol glucuronyltransferase, ec:1.14.13.8 - monooxygenase, ec:2.5.1.18 - transferase
TR78010|c0_g1_i1	Sphingolipid metabolism	map00600	14	ec:3.2.1.23 - lactase (ambiguous), ec:3.2.1.22 - melibiase, ec:3.1.4.41 - phosphodiesterase D, ec:1.1.1.102 - reductase, ec:2.7.1.138 - kinase, ec:3.2.1.45 - psychosine hydrolase, ec:3.1.4.12 - phosphodiesterase, ec:2.3.1.50 - C-palmitoyltransferase, ec:3.5.1.23 - acylsphingosine deacylase, ec:2.7.1.91 - kinase, ec:2.3.1.24 - N-acyltransferase, ec:3.1.3.4 - phosphatase, ec:4.1.2.27 - aldolase, ec…
Mj_1_GCCAAT_L005_R1_001_(paired)_trimmed_(paired)_contig_91632	Glyoxylate and dicarboxylate metabolism	map00630	34	ec:3.5.1.9 - kynurenine formamidase, ec:4.1.3.1 - lyase, ec:1.1.1.79 - reductase (NADP+), ec:2.7.1.31 - 3-kinase, ec:3.5.1.49 - ec:3.5.1.49 formamidase, ec:4.1.1.2 - decarboxylase, ec:1.1.1.60 - reductase, ec:3.1.3.18 - phosphatase, ec:1.1.1.37 - dehydrogenase, ec:1.1.99.14 - dehydrogenase, ec:2.1.2.1 - hydroxymethyltransferase, ec:1.1.1.81 - reductase, ec:6.3.1.2 - synthetase, ec:2.6.1.45 - tran…
Mj_1_GCCAAT_L005_R1_001_(paired)_trimmed_(paired)_contig_92960	Carbon fixation in photosynthetic organisms, Glycolysis / Gluconeogenesis	map00710, map00010	22, 28	ec:5.1.3.1 - 3-epimerase, ec:4.1.1.49 - carboxykinase (ATP), ec:2.7.2.3 - kinase, ec:1.1.1.37 - dehydrogenase, ec:5.3.1.1 - isomerase, ec:2.7.9.1 - phosphate dikinase, ec:2.6.1.1 - transaminase, ec:1.2.1.12 - dehydrogenase (phosphorylating), ec:3.1.3.11 - hexose diphosphatase, ec:5.3.1.6 - isomerase, ec:2.2.1.1 - glycolaldehydetransferase, ec:4.1.2.13 - aldolase, ec:1.1.1.82 - dehydrogenase (NADP…
Mj_1_GCCAAT_L005_R1_001_(paired)_trimmed_(paired)_contig_89315	Purine metabolism	map00230	60	ec:3.6.1.15 - phosphatase, ec:4.6.1.2 - cyclase, ec:3.2.2.7 - nucleosidase, ec:3.6.1.9 - diphosphatase, ec:1.17.4.1 - reductase, ec:2.7.4.10 - kinase, ec:6.3.3.1 - cyclo-ligase, ec:1.7.3.3 - urate hydroxylase, ec:3.1.3.5 - uridine 5'-nucleotidase, ec:2.7.1.74 - kinase, ec:6.3.2.6 - synthase, ec:3.5.3.9 - deiminase, ec:3.2.2.1 - nucleosidase, ec:1.17.3.2 - oxidase, ec:2.7.4.3 - kinase, ec:3.5.2.17…
Mj_1_GCCAAT_L005_R1_001_(paired)_trimmed_(paired)_contig_90300	Phenylpropanoid biosynthesis	map00940	17	ec:3.2.1.126 - beta-glucosidase, ec:1.1.1.195 - dehydrogenase, ec:1.11.1.7 - lactoperoxidase, ec:2.1.1.146 - O-methyltransferase, ec:1.2.1.68 - dehydrogenase, ec:4.3.1.24 - ammonia-lyase, ec:2.1.1.104 - O-methyltransferase, ec:2.4.1.111 - glucosyltransferase, ec:2.4.1.128 - glucosyltransferase, ec:2.3.1.92 - O-sinapoyltransferase, ec:1.2.1.44 - reductase, ec:2.3.1.99 - O-hydroxycinnamoyltransfera…
TR69171|c1_g1_i1	Glycerophospholipid metabolism	map00564	33	ec:3.1.4.4 - D, ec:3.1.1.52 - deacylase, ec:2.3.1.51 - O-acyltransferase, ec:2.7.8.5 - 1-phosphatidyltransferase, ec:2.1.1.17 - N-methyltransferase, ec:1.1.1.8 - dehydrogenase (NAD+), ec:2.7.8.1 - EPT, ec:2.1.1.103 - N-methyltransferase, ec:2.7.1.107 - kinase (ATP), ec:3.1.1.32 - A1, ec:3.6.1.16 - diphosphatase, ec:2.7.1.32 - kinase, ec:3.1.3.75 - phosphatase, ec:1.1.1.94 - dehydrogenase [NAD(P)+…
TR69171|c1_g1_i2	Glycerophospholipid metabolism	map00564	33	ec:3.1.4.4 - D, ec:3.1.1.52 - deacylase, ec:2.3.1.51 - O-acyltransferase, ec:2.7.8.5 - 1-phosphatidyltransferase, ec:2.1.1.17 - N-methyltransferase, ec:1.1.1.8 - dehydrogenase (NAD+), ec:2.7.8.1 - EPT, ec:2.1.1.103 - N-methyltransferase, ec:2.7.1.107 - kinase (ATP), ec:3.1.1.32 - A1, ec:3.6.1.16 - diphosphatase, ec:2.7.1.32 - kinase, ec:3.1.3.75 - phosphatase, ec:1.1.1.94 - dehydrogenase [NAD(P)+…
C963972	Glyoxylate and dicarboxylate metabolism	map00630	34	ec:3.5.1.9 - kynurenine formamidase, ec:4.1.3.1 - lyase, ec:1.1.1.79 - reductase (NADP+), ec:2.7.1.31 - 3-kinase, ec:3.5.1.49 - ec:3.5.1.49 formamidase, ec:4.1.1.2 - decarboxylase, ec:1.1.1.60 - reductase, ec:3.1.3.18 - phosphatase, ec:1.1.1.37 - dehydrogenase, ec:1.1.99.14 - dehydrogenase, ec:2.1.2.1 - hydroxymethyltransferase, ec:1.1.1.81 - reductase, ec:6.3.1.2 - synthetase, ec:2.6.1.45 - tran…
TR57722|c0_g1_i1	Ascorbate and aldarate metabolism, Inositol phosphate metabolism	map00053, map00562	18, 25	ec:1.11.1.11 - peroxidase, ec:1.2.1.3 - dehydrogenase (NAD+), ec:4.1.2.20 - aldolase, ec:1.8.5.1 - dehydrogenase (ascorbate), ec:1.1.1.122 - 1-dehydrogenase, ec:1.10.3.3 - oxidase, ec:2.7.7.44 - uridylyltransferase, ec:1.1.3.8 - oxidase, ec:1.1.1.22 - 6-dehydrogenase, ec:1.3.2.3 - dehydrogenase, ec:1.6.5.4 - reductase (NADH), ec:1.13.99.1 - oxygenase, ec:5.1.3.18 - 3,5-epimerase, ec:2.4.1.17 - 1-…
C864054	Carbon fixation in photosynthetic organisms, Pyruvate metabolism, Benzoate degradation, C5-Branched dibasic acid metabolism	map00710, map00620, map00362, map00660	22, 33, 10, 5	ec:5.1.3.1 - 3-epimerase, ec:4.1.1.49 - carboxykinase (ATP), ec:2.7.2.3 - kinase, ec:1.1.1.37 - dehydrogenase, ec:5.3.1.1 - isomerase, ec:2.7.9.1 - phosphate dikinase, ec:2.6.1.1 - transaminase, ec:1.2.1.12 - dehydrogenase (phosphorylating), ec:3.1.3.11 - hexose diphosphatase, ec:5.3.1.6 - isomerase, ec:2.2.1.1 - glycolaldehydetransferase, ec:4.1.2.13 - aldolase, ec:1.1.1.82 - dehydrogenase (NADP…
Mj_1_GCCAAT_L005_R1_001_(paired)_trimmed_(paired)_contig_91688	Glyoxylate and dicarboxylate metabolism, Tryptophan metabolism	map00630, map00380	34, 29	ec:3.5.1.9 - kynurenine formamidase, ec:4.1.3.1 - lyase, ec:1.1.1.79 - reductase (NADP+), ec:2.7.1.31 - 3-kinase, ec:3.5.1.49 - ec:3.5.1.49 formamidase, ec:4.1.1.2 - decarboxylase, ec:1.1.1.60 - reductase, ec:3.1.3.18 - phosphatase, ec:1.1.1.37 - dehydrogenase, ec:1.1.99.14 - dehydrogenase, ec:2.1.2.1 - hydroxymethyltransferase, ec:1.1.1.81 - reductase, ec:6.3.1.2 - synthetase, ec:2.6.1.45 - tran…
Mj_1_GCCAAT_L005_R1_001_(paired)_trimmed_(paired)_contig_106589	Amino sugar and nucleotide sugar metabolism	map00520	46	ec:5.1.3.2 - 4-epimerase, ec:2.4.2.24 - synthase, ec:2.7.7.9 - uridylyltransferase, ec:2.7.1.7 - mannokinase (phosphorylating), ec:5.4.2.8 - mannose phosphomutase, ec:2.7.1.44 - galacturonokinase (phosphorylating) D-galacturonic acid kinase, ec:2.7.7.22 - guanylyltransferase (GDP), ec:5.1.3.6 - 4-epimerase, ec:3.2.1.14 - ChiC, ec:2.7.7.13 - guanylyltransferase, ec:5.1.3.12 - 5'-epimerase, ec:2.7.…
TR73230|c0_g1_i2	Purine metabolism	map00230	60	ec:3.6.1.15 - phosphatase, ec:4.6.1.2 - cyclase, ec:3.2.2.7 - nucleosidase, ec:3.6.1.9 - diphosphatase, ec:1.17.4.1 - reductase, ec:2.7.4.10 - kinase, ec:6.3.3.1 - cyclo-ligase, ec:1.7.3.3 - urate hydroxylase, ec:3.1.3.5 - uridine 5'-nucleotidase, ec:2.7.1.74 - kinase, ec:6.3.2.6 - synthase, ec:3.5.3.9 - deiminase, ec:3.2.2.1 - nucleosidase, ec:1.17.3.2 - oxidase, ec:2.7.4.3 - kinase, ec:3.5.2.17…
TR73230|c0_g1_i1	Purine metabolism	map00230	60	ec:3.6.1.15 - phosphatase, ec:4.6.1.2 - cyclase, ec:3.2.2.7 - nucleosidase, ec:3.6.1.9 - diphosphatase, ec:1.17.4.1 - reductase, ec:2.7.4.10 - kinase, ec:6.3.3.1 - cyclo-ligase, ec:1.7.3.3 - urate hydroxylase, ec:3.1.3.5 - uridine 5'-nucleotidase, ec:2.7.1.74 - kinase, ec:6.3.2.6 - synthase, ec:3.5.3.9 - deiminase, ec:3.2.2.1 - nucleosidase, ec:1.17.3.2 - oxidase, ec:2.7.4.3 - kinase, ec:3.5.2.17…
TR57689|c0_g1_i1	Porphyrin and chlorophyll metabolism	map00860	31	ec:2.3.1.37 - synthase, ec:3.1.1.14 - CLH, ec:1.3.7.4 - oxidoreductase, ec:4.99.1.4 - ferrochelatase, ec:4.2.1.75 - synthase, ec:3.2.1.31 - beta-glucuronide glucuronohydrolase glucuronidase, ec:4.1.1.37 - decarboxylase, ec:1.3.1.75 - protochlorophyllide a 8-vinyl-reductase (NADPH), ec:4.2.1.24 - synthase, ec:5.4.3.8 - 2,1-aminomutase, ec:1.3.1.33 - reductase, ec:2.1.1.107 - C-methyltransferase, e…
C973398	Starch and sucrose metabolism	map00500	35	ec:3.2.1.4 - endo-1,4-beta-D-glucanase, ec:3.2.1.26 - invertase, ec:3.6.1.9 - diphosphatase, ec:2.7.7.9 - uridylyltransferase, ec:2.4.1.15 - synthase (UDP-forming), ec:3.2.1.1 - glycogenase, ec:3.2.1.39 - endo-1,3-beta-D-glucosidase, ec:2.4.1.21 - synthase (glycosyl-transferring), ec:2.4.1.12 - synthase (UDP-forming), ec:2.7.1.4 - fructokinase (phosphorylating), ec:5.3.1.9 - isomerase, ec:2.4.1.3…
TR62993|c1_g1_i1	Fructose and mannose metabolism	map00051	27	ec:5.3.1.5 - isomerase, ec:1.1.1.21 - reductase, ec:2.7.1.7 - mannokinase (phosphorylating), ec:5.4.2.8 - mannose phosphomutase, ec:2.7.7.22 - guanylyltransferase (GDP), ec:1.1.1.67 - 2-dehydrogenase, ec:3.2.1.78 - endo-1,4-beta-mannosidase, ec:1.1.1.122 - 1-dehydrogenase, ec:5.3.1.1 - isomerase, ec:2.7.7.13 - guanylyltransferase, ec:2.7.1.11 - phosphohexokinase, ec:2.7.1.4 - fructokinase (phosph…
Mj_1_GCCAAT_L005_R1_001_(paired)_trimmed_(paired)_contig_64069	Glycerolipid metabolism	map00561	24	ec:2.3.1.20 - O-acyltransferase, ec:1.2.1.3 - dehydrogenase (NAD+), ec:2.7.1.31 - 3-kinase, ec:2.3.1.51 - O-acyltransferase, ec:2.7.7.9 - uridylyltransferase, ec:1.1.1.21 - reductase, ec:2.4.1.46 - synthase, ec:3.2.1.22 - melibiase, ec:2.7.1.107 - kinase (ATP), ec:3.1.1.23 - lipase, ec:2.3.1.22 - O-acyltransferase, ec:2.4.1.241 - synthase, ec:3.13.1.1 - synthase, ec:2.4.1.184 - galactosyltransfer…
Mj_1_GCCAAT_L005_R1_001_(paired)_trimmed_(paired)_contig_105250	Cysteine and methionine metabolism	map00270	45	ec:1.13.11.53 - dioxygenase (Ni2+-requiring), ec:1.2.1.11 - dehydrogenase, ec:1.13.11.20 - dioxygenase, ec:4.4.1.14 - synthase, ec:2.6.1.57 - transaminase, ec:1.1.1.37 - dehydrogenase, ec:1.14.17.4 - oxidase, ec:2.6.1.5 - transaminase, ec:4.1.1.50 - decarboxylase, ec:2.1.1.13 - synthase, ec:2.5.1.49 - aminocarboxypropyltransferase, ec:2.3.1.30 - O-acetyltransferase, ec:2.1.1.5 - S-methyltransfera…
Mj_1_GCCAAT_L005_R1_001_(paired)_trimmed_(paired)_contig_18843	Pyruvate metabolism, Histidine metabolism, Chloroalkane and chloroalkene degradation, Ascorbate and aldarate metabolism, Lysine degradation, Fatty acid degradation, Arginine and proline metabolism, Limonene and pinene degradation, Tryptophan metabolism, Glycerolipid metabolism, beta-Alanine metabolism, Valine, leucine and isoleucine degradation, Glycolysis / Gluconeogenesis, Insect hormone biosyn…	map00620, map00340, map00625, map00053, map00310, map00071, map00330, map00903, map00380, map00561, map00410, map00280, map00010, map00981	33, 13, 5, 18, 12, 14, 28, 2, 29, 24, 17, 21, 28, 2	ec:4.1.1.32 - carboxykinase (GTP), ec:1.2.1.3 - dehydrogenase (NAD+), ec:1.1.1.79 - reductase (NADP+), ec:4.1.1.49 - carboxykinase (ATP), ec:2.3.1.12 - acetyltransferase, ec:1.1.2.3 - dehydrogenase (cytochrome), ec:1.1.1.37 - dehydrogenase, ec:1.1.1.28 - dehydrogenase, ec:3.1.2.1 - hydrolase, ec:2.7.9.1 - phosphate dikinase, ec:6.4.1.2 - carboxylase, ec:1.1.2.4 - dehydrogenase (cytochrome), ec:3.…
Mj_1_GCCAAT_L005_R1_001_(paired)_trimmed_(paired)_contig_105255	Isoquinoline alkaloid biosynthesis	map00950	17	ec:2.6.1.57 - transaminase, ec:2.1.1.128 - 6-O-methyltransferase, ec:2.6.1.5 - transaminase, ec:4.1.1.28 - decarboxylase, ec:1.1.1.247 - reductase (NADPH), ec:2.6.1.1 - transaminase, ec:2.1.1.116 - 4'-O-methyltransferase, ec:4.1.1.25 - decarboxylase, ec:1.4.3.2 - oxidase, ec:1.14.18.1 - monophenol monooxygenase, ec:1.21.3.3 - oxidase, ec:2.3.1.150 - 7-O-acetyltransferase, ec:1.1.1.248 - reductase…
Mj_1_GCCAAT_L005_R1_001_(paired)_trimmed_(paired)_contig_106586	Phenylpropanoid biosynthesis	map00940	17	ec:3.2.1.126 - beta-glucosidase, ec:1.1.1.195 - dehydrogenase, ec:1.11.1.7 - lactoperoxidase, ec:2.1.1.146 - O-methyltransferase, ec:1.2.1.68 - dehydrogenase, ec:4.3.1.24 - ammonia-lyase, ec:2.1.1.104 - O-methyltransferase, ec:2.4.1.111 - glucosyltransferase, ec:2.4.1.128 - glucosyltransferase, ec:2.3.1.92 - O-sinapoyltransferase, ec:1.2.1.44 - reductase, ec:2.3.1.99 - O-hydroxycinnamoyltransfera…
scaffold12337	Porphyrin and chlorophyll metabolism	map00860	31	ec:2.3.1.37 - synthase, ec:3.1.1.14 - CLH, ec:1.3.7.4 - oxidoreductase, ec:4.99.1.4 - ferrochelatase, ec:4.2.1.75 - synthase, ec:3.2.1.31 - beta-glucuronide glucuronohydrolase glucuronidase, ec:4.1.1.37 - decarboxylase, ec:1.3.1.75 - protochlorophyllide a 8-vinyl-reductase (NADPH), ec:4.2.1.24 - synthase, ec:5.4.3.8 - 2,1-aminomutase, ec:1.3.1.33 - reductase, ec:2.1.1.107 - C-methyltransferase, e…
TR105586|c0_g1_i1	Carbon fixation in photosynthetic organisms, Pyruvate metabolism, Glyoxylate and dicarboxylate metabolism, Cysteine and methionine metabolism, Methane metabolism, Carbon fixation pathways in prokaryotes, Citrate cycle (TCA cycle)	map00710, map00620, map00630, map00270, map00680, map00720, map00020	22, 33, 34, 45, 23, 21, 18	ec:5.1.3.1 - 3-epimerase, ec:4.1.1.49 - carboxykinase (ATP), ec:2.7.2.3 - kinase, ec:1.1.1.37 - dehydrogenase, ec:5.3.1.1 - isomerase, ec:2.7.9.1 - phosphate dikinase, ec:2.6.1.1 - transaminase, ec:1.2.1.12 - dehydrogenase (phosphorylating), ec:3.1.3.11 - hexose diphosphatase, ec:5.3.1.6 - isomerase, ec:2.2.1.1 - glycolaldehydetransferase, ec:4.1.2.13 - aldolase, ec:1.1.1.82 - dehydrogenase (NADP…
TR92392|c0_g1_i1	Sphingolipid metabolism	map00600	14	ec:3.2.1.23 - lactase (ambiguous), ec:3.2.1.22 - melibiase, ec:3.1.4.41 - phosphodiesterase D, ec:1.1.1.102 - reductase, ec:2.7.1.138 - kinase, ec:3.2.1.45 - psychosine hydrolase, ec:3.1.4.12 - phosphodiesterase, ec:2.3.1.50 - C-palmitoyltransferase, ec:3.5.1.23 - acylsphingosine deacylase, ec:2.7.1.91 - kinase, ec:2.3.1.24 - N-acyltransferase, ec:3.1.3.4 - phosphatase, ec:4.1.2.27 - aldolase, ec…
Mj_1_GCCAAT_L005_R1_001_(paired)_trimmed_(paired)_contig_90352	Valine, leucine and isoleucine biosynthesis, Pantothenate and CoA biosynthesis	map00290, map00770	9, 19	ec:1.1.1.85 - dehydrogenase, ec:4.2.1.33 - dehydratase, ec:4.2.1.9 - dehydratase, ec:4.3.1.19 - ammonia-lyase, ec:2.6.1.42 - transaminase, ec:1.1.1.86 - reductoisomerase (NADP+), ec:2.6.1.6 - transaminase, ec:2.3.3.13 - synthase, ec:2.2.1.6 - synthase, ec:6.3.2.1 - ligase (AMP-forming), ec:3.5.2.2 - hydantoinase, ec:3.6.1.9 - diphosphatase, ec:1.3.1.2 - dehydrogenase (NADP+), ec:3.5.1.6 - N-carba…
Mj_1_GCCAAT_L005_R1_001_(paired)_trimmed_(paired)_contig_77375	T cell receptor signaling pathway	map04660	2	ec:2.7.10.2 - protein-tyrosine kinase, ec:3.1.3.16 - phosphatase
TR63814|c0_g1_i1	T cell receptor signaling pathway	map04660	2	ec:2.7.10.2 - protein-tyrosine kinase, ec:3.1.3.16 - phosphatase
Mj_1_GCCAAT_L005_R1_001_(paired)_trimmed_(paired)_contig_90369	Carbon fixation in photosynthetic organisms, Pentose phosphate pathway, Fructose and mannose metabolism, Methane metabolism, Glycolysis / Gluconeogenesis	map00710, map00030, map00051, map00680, map00010	22, 21, 27, 23, 28	ec:5.1.3.1 - 3-epimerase, ec:4.1.1.49 - carboxykinase (ATP), ec:2.7.2.3 - kinase, ec:1.1.1.37 - dehydrogenase, ec:5.3.1.1 - isomerase, ec:2.7.9.1 - phosphate dikinase, ec:2.6.1.1 - transaminase, ec:1.2.1.12 - dehydrogenase (phosphorylating), ec:3.1.3.11 - hexose diphosphatase, ec:5.3.1.6 - isomerase, ec:2.2.1.1 - glycolaldehydetransferase, ec:4.1.2.13 - aldolase, ec:1.1.1.82 - dehydrogenase (NADP…
Mj_1_GCCAAT_L005_R1_001_(paired)_trimmed_(paired)_contig_18835	Methane metabolism, Glycolysis / Gluconeogenesis	map00680, map00010	23, 28	ec:2.2.1.3 - transketolase, ec:4.4.1.22 - synthase, ec:4.2.1.11 - hydratase, ec:1.1.1.37 - dehydrogenase, ec:2.1.2.1 - hydroxymethyltransferase, ec:2.7.1.11 - phosphohexokinase, ec:2.6.1.45 - transaminase, ec:1.2.1.46 - dehydrogenase, ec:4.1.1.25 - decarboxylase, ec:3.1.3.11 - hexose diphosphatase, ec:1.1.3.13 - oxidase, ec:4.1.2.13 - aldolase, ec:1.1.1.29 - dehydrogenase, ec:6.2.1.1 - ligase, ec…
Mj_1_GCCAAT_L005_R1_001_(paired)_trimmed_(paired)_contig_88046	Cysteine and methionine metabolism	map00270	45	ec:1.13.11.53 - dioxygenase (Ni2+-requiring), ec:1.2.1.11 - dehydrogenase, ec:1.13.11.20 - dioxygenase, ec:4.4.1.14 - synthase, ec:2.6.1.57 - transaminase, ec:1.1.1.37 - dehydrogenase, ec:1.14.17.4 - oxidase, ec:2.6.1.5 - transaminase, ec:4.1.1.50 - decarboxylase, ec:2.1.1.13 - synthase, ec:2.5.1.49 - aminocarboxypropyltransferase, ec:2.3.1.30 - O-acetyltransferase, ec:2.1.1.5 - S-methyltransfera…
scaffold13660	Nicotinate and nicotinamide metabolism	map00760	17	ec:2.7.7.1 - adenylyltransferase, ec:3.6.1.9 - diphosphatase, ec:2.7.1.23 - kinase, ec:3.1.3.5 - uridine 5'-nucleotidase, ec:1.2.1.24 - dehydrogenase (NAD+), ec:1.2.1.16 - dehydrogenase [NAD(P)+], ec:3.2.2.1 - nucleosidase, ec:2.4.2.19 - diphosphorylase (carboxylating), ec:1.6.1.1 - transhydrogenase (Si-specific), ec:6.3.5.1 - synthase (glutamine-hydrolysing), ec:2.7.7.18 - adenylyltransferase, e…
scaffold13662	N-Glycan biosynthesis	map00510	18	ec:2.4.1.101 - 2-beta-N-acetylglucosaminyltransferase, ec:2.4.1.117 - beta-glucosyltransferase, ec:2.4.1.259 - alpha-1,2-mannosyltransferase, ec:2.4.1.131 - alpha-1,2-mannosyltransferase, ec:2.4.1.144 - 4-beta-N-acetylglucosaminyltransferase, ec:2.4.1.261 - alpha-1,2-mannosyltransferase, ec:3.2.1.106 - glucosidase, ec:2.4.1.132 - alpha-1,3-mannosyltransferase, ec:3.6.1.43 - dolichol diphosphatase…
TR43132|c0_g4_i1	Carbon fixation in photosynthetic organisms, Pyruvate metabolism	map00710, map00620	22, 33	ec:5.1.3.1 - 3-epimerase, ec:4.1.1.49 - carboxykinase (ATP), ec:2.7.2.3 - kinase, ec:1.1.1.37 - dehydrogenase, ec:5.3.1.1 - isomerase, ec:2.7.9.1 - phosphate dikinase, ec:2.6.1.1 - transaminase, ec:1.2.1.12 - dehydrogenase (phosphorylating), ec:3.1.3.11 - hexose diphosphatase, ec:5.3.1.6 - isomerase, ec:2.2.1.1 - glycolaldehydetransferase, ec:4.1.2.13 - aldolase, ec:1.1.1.82 - dehydrogenase (NADP…
TR1507|c0_g1_i1	Pyrimidine metabolism	map00240	31	ec:2.4.2.9 - phosphoribosyltransferase, ec:2.7.1.48 - kinase, ec:3.5.2.2 - hydantoinase, ec:3.6.1.9 - diphosphatase, ec:1.17.4.1 - reductase, ec:1.3.1.2 - dehydrogenase (NADP+), ec:3.5.1.6 - N-carbamoyl-beta-alanine amidohydrolase, ec:3.5.4.12 - deaminase, ec:3.5.4.5 - deaminase, ec:3.1.3.5 - uridine 5'-nucleotidase, ec:2.7.1.74 - kinase, ec:6.3.5.5 - synthase (glutamine-hydrolysing), ec:2.7.4.14…
Mj_1_GCCAAT_L005_R1_001_(paired)_trimmed_(paired)_contig_89375	Thiamine metabolism, Vitamin B6 metabolism	map00730, map00750	12, 8	ec:3.6.1.15 - phosphatase, ec:2.7.4.7 - kinase, ec:2.8.1.7 - desulfurase, ec:2.7.6.2 - diphosphokinase, ec:2.7.1.50 - kinase, ec:2.7.4.3 - kinase, ec:2.7.1.49 - kinase, ec:3.5.99.2 - aminohydrolase, ec:2.5.1.3 - phosphate synthase, ec:3.1.3.2 - phosphatase, ec:4.1.99.19 - synthase, ec:2.2.1.7 - synthase, ec:1.4.3.5 - 5'-phosphate synthase, ec:4.2.3.1 - synthase, ec:1.1.1.65 - 4-dehydrogenase, ec:…
Mj_1_GCCAAT_L005_R1_001_(paired)_trimmed_(paired)_contig_105244	Pyruvate metabolism, Histidine metabolism, Chloroalkane and chloroalkene degradation, Ascorbate and aldarate metabolism, Lysine degradation, Fatty acid degradation, Nitrogen metabolism, Tyrosine metabolism, Metabolism of xenobiotics by cytochrome P450, Arginine and proline metabolism, Limonene and pinene degradation, Tryptophan metabolism, Glycerolipid metabolism, Phenylalanine metabolism, beta-A…	map00620, map00340, map00625, map00053, map00310, map00071, map00910, map00350, map00980, map00330, map00903, map00380, map00561, map00360, map00410, map00280, map00982, map00010, map00981	33, 13, 5, 18, 12, 14, 18, 26, 8, 28, 2, 29, 24, 22, 17, 21, 7, 28, 2	ec:4.1.1.32 - carboxykinase (GTP), ec:1.2.1.3 - dehydrogenase (NAD+), ec:1.1.1.79 - reductase (NADP+), ec:4.1.1.49 - carboxykinase (ATP), ec:2.3.1.12 - acetyltransferase, ec:1.1.2.3 - dehydrogenase (cytochrome), ec:1.1.1.37 - dehydrogenase, ec:1.1.1.28 - dehydrogenase, ec:3.1.2.1 - hydrolase, ec:2.7.9.1 - phosphate dikinase, ec:6.4.1.2 - carboxylase, ec:1.1.2.4 - dehydrogenase (cytochrome), ec:3.…
Mj_1_GCCAAT_L005_R1_001_(paired)_trimmed_(paired)_contig_88042	Phosphatidylinositol signaling system, Inositol phosphate metabolism	map04070, map00562	20, 25	ec:2.7.1.127 - 3-kinase, ec:2.7.1.158 - 2-kinase, ec:3.1.3.56 - 5-phosphatase, ec:2.7.1.107 - kinase (ATP), ec:2.7.1.137 - 3-kinase, ec:2.7.1.151 - multikinase, ec:3.1.4.11 - phospholipase C, ec:2.7.1.159 - 5/6-kinase, ec:3.1.3.36 - 5-phosphatase, ec:2.7.11.13 - kinase C, ec:3.1.3.57 - 1-phosphatase, ec:2.7.1.67 - 4-kinase, ec:2.7.8.11 - 3-phosphatidyltransferase, ec:2.7.7.41 - cytidylyltransfera…
Mj_1_GCCAAT_L005_R1_001_(paired)_trimmed_(paired)_contig_106575	Biosynthesis of unsaturated fatty acids	map01040	6	ec:1.3.3.6 - oxidase, ec:2.3.1.16 - C-acyltransferase, ec:3.1.2.2 - hydrolase, ec:1.14.19.1 - 9-desaturase, ec:1.14.19.2 - 9-desaturase, ec:2.3.1.176 - C-acyltransferase
Mj_1_GCCAAT_L005_R1_001_(paired)_trimmed_(paired)_contig_18832	T cell receptor signaling pathway	map04660	2	ec:2.7.10.2 - protein-tyrosine kinase, ec:3.1.3.16 - phosphatase
TR115631|c0_g1_i1	Carbon fixation in photosynthetic organisms, Pyruvate metabolism, Glyoxylate and dicarboxylate metabolism, Cysteine and methionine metabolism, Methane metabolism, Carbon fixation pathways in prokaryotes, Citrate cycle (TCA cycle)	map00710, map00620, map00630, map00270, map00680, map00720, map00020	22, 33, 34, 45, 23, 21, 18	ec:5.1.3.1 - 3-epimerase, ec:4.1.1.49 - carboxykinase (ATP), ec:2.7.2.3 - kinase, ec:1.1.1.37 - dehydrogenase, ec:5.3.1.1 - isomerase, ec:2.7.9.1 - phosphate dikinase, ec:2.6.1.1 - transaminase, ec:1.2.1.12 - dehydrogenase (phosphorylating), ec:3.1.3.11 - hexose diphosphatase, ec:5.3.1.6 - isomerase, ec:2.2.1.1 - glycolaldehydetransferase, ec:4.1.2.13 - aldolase, ec:1.1.1.82 - dehydrogenase (NADP…
scaffold12336	Phenylpropanoid biosynthesis	map00940	17	ec:3.2.1.126 - beta-glucosidase, ec:1.1.1.195 - dehydrogenase, ec:1.11.1.7 - lactoperoxidase, ec:2.1.1.146 - O-methyltransferase, ec:1.2.1.68 - dehydrogenase, ec:4.3.1.24 - ammonia-lyase, ec:2.1.1.104 - O-methyltransferase, ec:2.4.1.111 - glucosyltransferase, ec:2.4.1.128 - glucosyltransferase, ec:2.3.1.92 - O-sinapoyltransferase, ec:1.2.1.44 - reductase, ec:2.3.1.99 - O-hydroxycinnamoyltransfera…
TR62101|c0_g1_i1	Starch and sucrose metabolism	map00500	35	ec:3.2.1.4 - endo-1,4-beta-D-glucanase, ec:3.2.1.26 - invertase, ec:3.6.1.9 - diphosphatase, ec:2.7.7.9 - uridylyltransferase, ec:2.4.1.15 - synthase (UDP-forming), ec:3.2.1.1 - glycogenase, ec:3.2.1.39 - endo-1,3-beta-D-glucosidase, ec:2.4.1.21 - synthase (glycosyl-transferring), ec:2.4.1.12 - synthase (UDP-forming), ec:2.7.1.4 - fructokinase (phosphorylating), ec:5.3.1.9 - isomerase, ec:2.4.1.3…
scaffold12330	Drug metabolism - other enzymes, Purine metabolism, Glutathione metabolism, Pyrimidine metabolism	map00983, map00230, map00480, map00240	19, 60, 19, 31	ec:2.7.1.48 - kinase, ec:3.5.2.2 - hydantoinase, ec:3.1.1.1 - ali-esterase, ec:1.17.4.1 - reductase, ec:1.3.1.2 - dehydrogenase (NADP+), ec:3.5.1.6 - N-carbamoyl-beta-alanine amidohydrolase, ec:3.2.1.31 - beta-glucuronide glucuronohydrolase glucuronidase, ec:3.5.4.5 - deaminase, ec:1.17.3.2 - oxidase, ec:2.7.4.14 - kinase, ec:1.1.1.205 - dehydrogenase, ec:2.4.2.10 - phosphoribosyltransferase, ec:…
TR57054|c0_g1_i3	T cell receptor signaling pathway, Th1 and Th2 cell differentiation, PD-L1 expression and PD-1 checkpoint pathway in cancer	map04660, map04658, map05235	2, 1, 1	ec:2.7.10.2 - protein-tyrosine kinase, ec:3.1.3.16 - phosphatase, ec:3.1.3.16 - phosphatase, ec:3.1.3.16 - phosphatase
Mj_1_GCCAAT_L005_R1_001_(paired)_trimmed_(paired)_contig_77362	Phenylpropanoid biosynthesis	map00940	17	ec:3.2.1.126 - beta-glucosidase, ec:1.1.1.195 - dehydrogenase, ec:1.11.1.7 - lactoperoxidase, ec:2.1.1.146 - O-methyltransferase, ec:1.2.1.68 - dehydrogenase, ec:4.3.1.24 - ammonia-lyase, ec:2.1.1.104 - O-methyltransferase, ec:2.4.1.111 - glucosyltransferase, ec:2.4.1.128 - glucosyltransferase, ec:2.3.1.92 - O-sinapoyltransferase, ec:1.2.1.44 - reductase, ec:2.3.1.99 - O-hydroxycinnamoyltransfera…
Mj_1_GCCAAT_L005_R1_001_(paired)_trimmed_(paired)_contig_91667	Starch and sucrose metabolism	map00500	35	ec:3.2.1.4 - endo-1,4-beta-D-glucanase, ec:3.2.1.26 - invertase, ec:3.6.1.9 - diphosphatase, ec:2.7.7.9 - uridylyltransferase, ec:2.4.1.15 - synthase (UDP-forming), ec:3.2.1.1 - glycogenase, ec:3.2.1.39 - endo-1,3-beta-D-glucosidase, ec:2.4.1.21 - synthase (glycosyl-transferring), ec:2.4.1.12 - synthase (UDP-forming), ec:2.7.1.4 - fructokinase (phosphorylating), ec:5.3.1.9 - isomerase, ec:2.4.1.3…
Mj_1_GCCAAT_L005_R1_001_(paired)_trimmed_(paired)_contig_90335	Amino sugar and nucleotide sugar metabolism, Galactose metabolism, Fructose and mannose metabolism, Starch and sucrose metabolism, Neomycin, kanamycin and gentamicin biosynthesis, Streptomycin biosynthesis, Glycolysis / Gluconeogenesis	map00520, map00052, map00051, map00500, map00524, map00521, map00010	46, 20, 27, 35, 2, 10, 28	ec:5.1.3.2 - 4-epimerase, ec:2.4.2.24 - synthase, ec:2.7.7.9 - uridylyltransferase, ec:2.7.1.7 - mannokinase (phosphorylating), ec:5.4.2.8 - mannose phosphomutase, ec:2.7.1.44 - galacturonokinase (phosphorylating) D-galacturonic acid kinase, ec:2.7.7.22 - guanylyltransferase (GDP), ec:5.1.3.6 - 4-epimerase, ec:3.2.1.14 - ChiC, ec:2.7.7.13 - guanylyltransferase, ec:5.1.3.12 - 5'-epimerase, ec:2.7.…
TR74363|c0_g1_i1	Glycerolipid metabolism	map00561	24	ec:2.3.1.20 - O-acyltransferase, ec:1.2.1.3 - dehydrogenase (NAD+), ec:2.7.1.31 - 3-kinase, ec:2.3.1.51 - O-acyltransferase, ec:2.7.7.9 - uridylyltransferase, ec:1.1.1.21 - reductase, ec:2.4.1.46 - synthase, ec:3.2.1.22 - melibiase, ec:2.7.1.107 - kinase (ATP), ec:3.1.1.23 - lipase, ec:2.3.1.22 - O-acyltransferase, ec:2.4.1.241 - synthase, ec:3.13.1.1 - synthase, ec:2.4.1.184 - galactosyltransfer…
TR74029|c1_g4_i4	Pyruvate metabolism	map00620	33	ec:4.1.1.32 - carboxykinase (GTP), ec:1.2.1.3 - dehydrogenase (NAD+), ec:1.1.1.79 - reductase (NADP+), ec:4.1.1.49 - carboxykinase (ATP), ec:2.3.1.12 - acetyltransferase, ec:1.1.2.3 - dehydrogenase (cytochrome), ec:1.1.1.37 - dehydrogenase, ec:1.1.1.28 - dehydrogenase, ec:3.1.2.1 - hydrolase, ec:2.7.9.1 - phosphate dikinase, ec:6.4.1.2 - carboxylase, ec:1.1.2.4 - dehydrogenase (cytochrome), ec:3.…
TR74363|c0_g1_i3	Glycerolipid metabolism	map00561	24	ec:2.3.1.20 - O-acyltransferase, ec:1.2.1.3 - dehydrogenase (NAD+), ec:2.7.1.31 - 3-kinase, ec:2.3.1.51 - O-acyltransferase, ec:2.7.7.9 - uridylyltransferase, ec:1.1.1.21 - reductase, ec:2.4.1.46 - synthase, ec:3.2.1.22 - melibiase, ec:2.7.1.107 - kinase (ATP), ec:3.1.1.23 - lipase, ec:2.3.1.22 - O-acyltransferase, ec:2.4.1.241 - synthase, ec:3.13.1.1 - synthase, ec:2.4.1.184 - galactosyltransfer…
TR75812|c0_g1_i23	Porphyrin and chlorophyll metabolism	map00860	31	ec:2.3.1.37 - synthase, ec:3.1.1.14 - CLH, ec:1.3.7.4 - oxidoreductase, ec:4.99.1.4 - ferrochelatase, ec:4.2.1.75 - synthase, ec:3.2.1.31 - beta-glucuronide glucuronohydrolase glucuronidase, ec:4.1.1.37 - decarboxylase, ec:1.3.1.75 - protochlorophyllide a 8-vinyl-reductase (NADPH), ec:4.2.1.24 - synthase, ec:5.4.3.8 - 2,1-aminomutase, ec:1.3.1.33 - reductase, ec:2.1.1.107 - C-methyltransferase, e…
TR74363|c0_g1_i4	Glycerolipid metabolism	map00561	24	ec:2.3.1.20 - O-acyltransferase, ec:1.2.1.3 - dehydrogenase (NAD+), ec:2.7.1.31 - 3-kinase, ec:2.3.1.51 - O-acyltransferase, ec:2.7.7.9 - uridylyltransferase, ec:1.1.1.21 - reductase, ec:2.4.1.46 - synthase, ec:3.2.1.22 - melibiase, ec:2.7.1.107 - kinase (ATP), ec:3.1.1.23 - lipase, ec:2.3.1.22 - O-acyltransferase, ec:2.4.1.241 - synthase, ec:3.13.1.1 - synthase, ec:2.4.1.184 - galactosyltransfer…
TR74029|c1_g4_i6	Pyruvate metabolism	map00620	33	ec:4.1.1.32 - carboxykinase (GTP), ec:1.2.1.3 - dehydrogenase (NAD+), ec:1.1.1.79 - reductase (NADP+), ec:4.1.1.49 - carboxykinase (ATP), ec:2.3.1.12 - acetyltransferase, ec:1.1.2.3 - dehydrogenase (cytochrome), ec:1.1.1.37 - dehydrogenase, ec:1.1.1.28 - dehydrogenase, ec:3.1.2.1 - hydrolase, ec:2.7.9.1 - phosphate dikinase, ec:6.4.1.2 - carboxylase, ec:1.1.2.4 - dehydrogenase (cytochrome), ec:3.…
Mj_1_GCCAAT_L005_R1_001_(paired)_trimmed_(paired)_contig_92993	alpha-Linolenic acid metabolism, Retinol metabolism, Chloroalkane and chloroalkene degradation, Glycine, serine and threonine metabolism, Fatty acid degradation, Tyrosine metabolism, Metabolism of xenobiotics by cytochrome P450, Naphthalene degradation, Drug metabolism - cytochrome P450, Glycolysis / Gluconeogenesis	map00592, map00830, map00625, map00260, map00071, map00350, map00980, map00626, map00982, map00010	11, 6, 5, 39, 14, 26, 8, 2, 7, 28	ec:4.2.1.92 - dehydratase, ec:1.3.3.6 - oxidase, ec:2.3.1.16 - C-acyltransferase, ec:3.1.1.32 - A1, ec:1.3.1.42 - reductase, ec:1.1.1.1 - dehydrogenase, ec:1.13.11.12 - 13S-lipoxygenase, ec:5.3.99.6 - cyclase, ec:4.2.1.17 - hydratase, ec:2.1.1.141 - O-methyltransferase, ec:3.1.1.4 - A2, ec:1.2.1.36 - dehydrogenase, ec:1.14.14.1 - monooxygenase, ec:1.1.1.1 - dehydrogenase, ec:1.2.3.1 - oxidase, ec…
Mj_1_GCCAAT_L005_R1_001_(paired)_trimmed_(paired)_contig_18829	T cell receptor signaling pathway	map04660	2	ec:2.7.10.2 - protein-tyrosine kinase, ec:3.1.3.16 - phosphatase
TR73014|c3_g2_i6	Carbon fixation in photosynthetic organisms, Pyruvate metabolism, Glycolysis / Gluconeogenesis, Citrate cycle (TCA cycle)	map00710, map00620, map00010, map00020	22, 33, 28, 18	ec:5.1.3.1 - 3-epimerase, ec:4.1.1.49 - carboxykinase (ATP), ec:2.7.2.3 - kinase, ec:1.1.1.37 - dehydrogenase, ec:5.3.1.1 - isomerase, ec:2.7.9.1 - phosphate dikinase, ec:2.6.1.1 - transaminase, ec:1.2.1.12 - dehydrogenase (phosphorylating), ec:3.1.3.11 - hexose diphosphatase, ec:5.3.1.6 - isomerase, ec:2.2.1.1 - glycolaldehydetransferase, ec:4.1.2.13 - aldolase, ec:1.1.1.82 - dehydrogenase (NADP…
TR75812|c0_g1_i20	Porphyrin and chlorophyll metabolism	map00860	31	ec:2.3.1.37 - synthase, ec:3.1.1.14 - CLH, ec:1.3.7.4 - oxidoreductase, ec:4.99.1.4 - ferrochelatase, ec:4.2.1.75 - synthase, ec:3.2.1.31 - beta-glucuronide glucuronohydrolase glucuronidase, ec:4.1.1.37 - decarboxylase, ec:1.3.1.75 - protochlorophyllide a 8-vinyl-reductase (NADPH), ec:4.2.1.24 - synthase, ec:5.4.3.8 - 2,1-aminomutase, ec:1.3.1.33 - reductase, ec:2.1.1.107 - C-methyltransferase, e…
TR73014|c3_g2_i5	Carbon fixation in photosynthetic organisms, Pyruvate metabolism, Glycolysis / Gluconeogenesis, Citrate cycle (TCA cycle)	map00710, map00620, map00010, map00020	22, 33, 28, 18	ec:5.1.3.1 - 3-epimerase, ec:4.1.1.49 - carboxykinase (ATP), ec:2.7.2.3 - kinase, ec:1.1.1.37 - dehydrogenase, ec:5.3.1.1 - isomerase, ec:2.7.9.1 - phosphate dikinase, ec:2.6.1.1 - transaminase, ec:1.2.1.12 - dehydrogenase (phosphorylating), ec:3.1.3.11 - hexose diphosphatase, ec:5.3.1.6 - isomerase, ec:2.2.1.1 - glycolaldehydetransferase, ec:4.1.2.13 - aldolase, ec:1.1.1.82 - dehydrogenase (NADP…
TR73014|c3_g2_i8	Carbon fixation in photosynthetic organisms, Pyruvate metabolism, Glycolysis / Gluconeogenesis, Citrate cycle (TCA cycle)	map00710, map00620, map00010, map00020	22, 33, 28, 18	ec:5.1.3.1 - 3-epimerase, ec:4.1.1.49 - carboxykinase (ATP), ec:2.7.2.3 - kinase, ec:1.1.1.37 - dehydrogenase, ec:5.3.1.1 - isomerase, ec:2.7.9.1 - phosphate dikinase, ec:2.6.1.1 - transaminase, ec:1.2.1.12 - dehydrogenase (phosphorylating), ec:3.1.3.11 - hexose diphosphatase, ec:5.3.1.6 - isomerase, ec:2.2.1.1 - glycolaldehydetransferase, ec:4.1.2.13 - aldolase, ec:1.1.1.82 - dehydrogenase (NADP…
TR75812|c0_g1_i22	Porphyrin and chlorophyll metabolism	map00860	31	ec:2.3.1.37 - synthase, ec:3.1.1.14 - CLH, ec:1.3.7.4 - oxidoreductase, ec:4.99.1.4 - ferrochelatase, ec:4.2.1.75 - synthase, ec:3.2.1.31 - beta-glucuronide glucuronohydrolase glucuronidase, ec:4.1.1.37 - decarboxylase, ec:1.3.1.75 - protochlorophyllide a 8-vinyl-reductase (NADPH), ec:4.2.1.24 - synthase, ec:5.4.3.8 - 2,1-aminomutase, ec:1.3.1.33 - reductase, ec:2.1.1.107 - C-methyltransferase, e…
TR73014|c3_g2_i7	Carbon fixation in photosynthetic organisms, Pyruvate metabolism, Glycolysis / Gluconeogenesis, Citrate cycle (TCA cycle)	map00710, map00620, map00010, map00020	22, 33, 28, 18	ec:5.1.3.1 - 3-epimerase, ec:4.1.1.49 - carboxykinase (ATP), ec:2.7.2.3 - kinase, ec:1.1.1.37 - dehydrogenase, ec:5.3.1.1 - isomerase, ec:2.7.9.1 - phosphate dikinase, ec:2.6.1.1 - transaminase, ec:1.2.1.12 - dehydrogenase (phosphorylating), ec:3.1.3.11 - hexose diphosphatase, ec:5.3.1.6 - isomerase, ec:2.2.1.1 - glycolaldehydetransferase, ec:4.1.2.13 - aldolase, ec:1.1.1.82 - dehydrogenase (NADP…
TR75812|c0_g1_i21	Porphyrin and chlorophyll metabolism	map00860	31	ec:2.3.1.37 - synthase, ec:3.1.1.14 - CLH, ec:1.3.7.4 - oxidoreductase, ec:4.99.1.4 - ferrochelatase, ec:4.2.1.75 - synthase, ec:3.2.1.31 - beta-glucuronide glucuronohydrolase glucuronidase, ec:4.1.1.37 - decarboxylase, ec:1.3.1.75 - protochlorophyllide a 8-vinyl-reductase (NADPH), ec:4.2.1.24 - synthase, ec:5.4.3.8 - 2,1-aminomutase, ec:1.3.1.33 - reductase, ec:2.1.1.107 - C-methyltransferase, e…
Mj_1_GCCAAT_L005_R1_001_(paired)_trimmed_(paired)_contig_105274	Thiamine metabolism, Riboflavin metabolism	map00730, map00740	12, 12	ec:3.6.1.15 - phosphatase, ec:2.7.4.7 - kinase, ec:2.8.1.7 - desulfurase, ec:2.7.6.2 - diphosphokinase, ec:2.7.1.50 - kinase, ec:2.7.4.3 - kinase, ec:2.7.1.49 - kinase, ec:3.5.99.2 - aminohydrolase, ec:2.5.1.3 - phosphate synthase, ec:3.1.3.2 - phosphatase, ec:4.1.99.19 - synthase, ec:2.2.1.7 - synthase, ec:3.6.1.9 - diphosphatase, ec:3.5.4.25 - cyclohydrolase II, ec:2.7.7.2 - synthase, ec:1.5.1.…
TR73014|c3_g2_i1	Carbon fixation in photosynthetic organisms, Pyruvate metabolism, Glycolysis / Gluconeogenesis, Citrate cycle (TCA cycle)	map00710, map00620, map00010, map00020	22, 33, 28, 18	ec:5.1.3.1 - 3-epimerase, ec:4.1.1.49 - carboxykinase (ATP), ec:2.7.2.3 - kinase, ec:1.1.1.37 - dehydrogenase, ec:5.3.1.1 - isomerase, ec:2.7.9.1 - phosphate dikinase, ec:2.6.1.1 - transaminase, ec:1.2.1.12 - dehydrogenase (phosphorylating), ec:3.1.3.11 - hexose diphosphatase, ec:5.3.1.6 - isomerase, ec:2.2.1.1 - glycolaldehydetransferase, ec:4.1.2.13 - aldolase, ec:1.1.1.82 - dehydrogenase (NADP…
TR72816|c1_g8_i1	Phosphatidylinositol signaling system, Glycerolipid metabolism, Glycerophospholipid metabolism, Nicotinate and nicotinamide metabolism	map04070, map00561, map00564, map00760	20, 24, 33, 17	ec:2.7.1.127 - 3-kinase, ec:2.7.1.158 - 2-kinase, ec:3.1.3.56 - 5-phosphatase, ec:2.7.1.107 - kinase (ATP), ec:2.7.1.137 - 3-kinase, ec:2.7.1.151 - multikinase, ec:3.1.4.11 - phospholipase C, ec:2.7.1.159 - 5/6-kinase, ec:3.1.3.36 - 5-phosphatase, ec:2.7.11.13 - kinase C, ec:3.1.3.57 - 1-phosphatase, ec:2.7.1.67 - 4-kinase, ec:2.7.8.11 - 3-phosphatidyltransferase, ec:2.7.7.41 - cytidylyltransfera…
Mj_1_GCCAAT_L005_R1_001_(paired)_trimmed_(paired)_contig_18820	Phosphatidylinositol signaling system	map04070	20	ec:2.7.1.127 - 3-kinase, ec:2.7.1.158 - 2-kinase, ec:3.1.3.56 - 5-phosphatase, ec:2.7.1.107 - kinase (ATP), ec:2.7.1.137 - 3-kinase, ec:2.7.1.151 - multikinase, ec:3.1.4.11 - phospholipase C, ec:2.7.1.159 - 5/6-kinase, ec:3.1.3.36 - 5-phosphatase, ec:2.7.11.13 - kinase C, ec:3.1.3.57 - 1-phosphatase, ec:2.7.1.67 - 4-kinase, ec:2.7.8.11 - 3-phosphatidyltransferase, ec:2.7.7.41 - cytidylyltransfera…
TR104324|c0_g1_i1	Glyoxylate and dicarboxylate metabolism, Tryptophan metabolism	map00630, map00380	34, 29	ec:3.5.1.9 - kynurenine formamidase, ec:4.1.3.1 - lyase, ec:1.1.1.79 - reductase (NADP+), ec:2.7.1.31 - 3-kinase, ec:3.5.1.49 - ec:3.5.1.49 formamidase, ec:4.1.1.2 - decarboxylase, ec:1.1.1.60 - reductase, ec:3.1.3.18 - phosphatase, ec:1.1.1.37 - dehydrogenase, ec:1.1.99.14 - dehydrogenase, ec:2.1.2.1 - hydroxymethyltransferase, ec:1.1.1.81 - reductase, ec:6.3.1.2 - synthetase, ec:2.6.1.45 - tran…
TR73014|c3_g2_i4	Carbon fixation in photosynthetic organisms, Pyruvate metabolism, Glycolysis / Gluconeogenesis, Citrate cycle (TCA cycle)	map00710, map00620, map00010, map00020	22, 33, 28, 18	ec:5.1.3.1 - 3-epimerase, ec:4.1.1.49 - carboxykinase (ATP), ec:2.7.2.3 - kinase, ec:1.1.1.37 - dehydrogenase, ec:5.3.1.1 - isomerase, ec:2.7.9.1 - phosphate dikinase, ec:2.6.1.1 - transaminase, ec:1.2.1.12 - dehydrogenase (phosphorylating), ec:3.1.3.11 - hexose diphosphatase, ec:5.3.1.6 - isomerase, ec:2.2.1.1 - glycolaldehydetransferase, ec:4.1.2.13 - aldolase, ec:1.1.1.82 - dehydrogenase (NADP…
TR73014|c3_g2_i3	Carbon fixation in photosynthetic organisms, Pyruvate metabolism, Glycolysis / Gluconeogenesis, Citrate cycle (TCA cycle)	map00710, map00620, map00010, map00020	22, 33, 28, 18	ec:5.1.3.1 - 3-epimerase, ec:4.1.1.49 - carboxykinase (ATP), ec:2.7.2.3 - kinase, ec:1.1.1.37 - dehydrogenase, ec:5.3.1.1 - isomerase, ec:2.7.9.1 - phosphate dikinase, ec:2.6.1.1 - transaminase, ec:1.2.1.12 - dehydrogenase (phosphorylating), ec:3.1.3.11 - hexose diphosphatase, ec:5.3.1.6 - isomerase, ec:2.2.1.1 - glycolaldehydetransferase, ec:4.1.2.13 - aldolase, ec:1.1.1.82 - dehydrogenase (NADP…
Mj_1_GCCAAT_L005_R1_001_(paired)_trimmed_(paired)_contig_64090	T cell receptor signaling pathway, Th1 and Th2 cell differentiation, PD-L1 expression and PD-1 checkpoint pathway in cancer	map04660, map04658, map05235	2, 1, 1	ec:2.7.10.2 - protein-tyrosine kinase, ec:3.1.3.16 - phosphatase, ec:3.1.3.16 - phosphatase, ec:3.1.3.16 - phosphatase
Mj_1_GCCAAT_L005_R1_001_(paired)_trimmed_(paired)_contig_91660	Pentose phosphate pathway, Amino sugar and nucleotide sugar metabolism, Starch and sucrose metabolism, Glycolysis / Gluconeogenesis	map00030, map00520, map00500, map00010	21, 46, 35, 28	ec:5.1.3.1 - 3-epimerase, ec:2.7.1.11 - phosphohexokinase, ec:5.3.1.9 - isomerase, ec:3.1.3.11 - hexose diphosphatase, ec:1.1.1.47 - 1-dehydrogenase [NAD(P)+], ec:5.3.1.6 - isomerase, ec:2.7.1.15 - deoxyribokinase, ec:2.2.1.1 - glycolaldehydetransferase, ec:4.1.2.13 - aldolase, ec:2.7.1.12 - gluconokinase (phosphorylating), ec:2.7.1.90 - 1-phosphotransferase, ec:5.4.2.2 - (alpha-D-glucose-1,6-bis…
Mj_1_GCCAAT_L005_R1_001_(paired)_trimmed_(paired)_contig_92990	Steroid biosynthesis	map00100	10	ec:1.1.1.170 - 3-dehydrogenase (decarboxylating), ec:5.4.99.8 - synthase, ec:5.3.3.5 - Delta-isomerase, ec:1.3.1.72 - reductase, ec:2.5.1.21 - synthase, ec:2.1.1.143 - C-methyltransferase, ec:1.3.1.21 - reductase, ec:2.1.1.41 - 24-C-methyltransferase, ec:5.5.1.9 - cycloisomerase, ec:1.3.1.70 - reductase
TR56770|c0_g1_i2	Photosynthesis	map00195	1	ec:1.18.1.2 - reductase
Mj_1_GCCAAT_L005_R1_001_(paired)_trimmed_(paired)_contig_18813	D-Glutamine and D-glutamate metabolism, Alanine, aspartate and glutamate metabolism, Arginine biosynthesis, Nitrogen metabolism, Taurine and hypotaurine metabolism	map00471, map00250, map00220, map00910, map00430	3, 29, 21, 18, 5	ec:5.1.1.10 - racemase, ec:1.4.1.3 - dehydrogenase [NAD(P)+], ec:3.5.1.2 - glutaminase I, ec:1.4.1.14 - synthase (NADH), ec:4.1.1.15 - decarboxylase, ec:6.3.4.5 - synthase, ec:1.4.1.2 - dehydrogenase, ec:1.2.1.24 - dehydrogenase (NAD+), ec:6.3.1.2 - synthetase, ec:3.5.1.3 - alpha-keto acid-omega-amidase, ec:1.2.1.16 - dehydrogenase [NAD(P)+], ec:6.3.4.16 - synthase (ammonia), ec:6.3.5.5 - synthas…
TR114461|c0_g1_i1	Fructose and mannose metabolism	map00051	27	ec:5.3.1.5 - isomerase, ec:1.1.1.21 - reductase, ec:2.7.1.7 - mannokinase (phosphorylating), ec:5.4.2.8 - mannose phosphomutase, ec:2.7.7.22 - guanylyltransferase (GDP), ec:1.1.1.67 - 2-dehydrogenase, ec:3.2.1.78 - endo-1,4-beta-mannosidase, ec:1.1.1.122 - 1-dehydrogenase, ec:5.3.1.1 - isomerase, ec:2.7.7.13 - guanylyltransferase, ec:2.7.1.11 - phosphohexokinase, ec:2.7.1.4 - fructokinase (phosph…
TR75812|c0_g1_i18	Porphyrin and chlorophyll metabolism	map00860	31	ec:2.3.1.37 - synthase, ec:3.1.1.14 - CLH, ec:1.3.7.4 - oxidoreductase, ec:4.99.1.4 - ferrochelatase, ec:4.2.1.75 - synthase, ec:3.2.1.31 - beta-glucuronide glucuronohydrolase glucuronidase, ec:4.1.1.37 - decarboxylase, ec:1.3.1.75 - protochlorophyllide a 8-vinyl-reductase (NADPH), ec:4.2.1.24 - synthase, ec:5.4.3.8 - 2,1-aminomutase, ec:1.3.1.33 - reductase, ec:2.1.1.107 - C-methyltransferase, e…
TR75812|c0_g1_i13	Porphyrin and chlorophyll metabolism	map00860	31	ec:2.3.1.37 - synthase, ec:3.1.1.14 - CLH, ec:1.3.7.4 - oxidoreductase, ec:4.99.1.4 - ferrochelatase, ec:4.2.1.75 - synthase, ec:3.2.1.31 - beta-glucuronide glucuronohydrolase glucuronidase, ec:4.1.1.37 - decarboxylase, ec:1.3.1.75 - protochlorophyllide a 8-vinyl-reductase (NADPH), ec:4.2.1.24 - synthase, ec:5.4.3.8 - 2,1-aminomutase, ec:1.3.1.33 - reductase, ec:2.1.1.107 - C-methyltransferase, e…
TR75812|c0_g1_i12	Porphyrin and chlorophyll metabolism	map00860	31	ec:2.3.1.37 - synthase, ec:3.1.1.14 - CLH, ec:1.3.7.4 - oxidoreductase, ec:4.99.1.4 - ferrochelatase, ec:4.2.1.75 - synthase, ec:3.2.1.31 - beta-glucuronide glucuronohydrolase glucuronidase, ec:4.1.1.37 - decarboxylase, ec:1.3.1.75 - protochlorophyllide a 8-vinyl-reductase (NADPH), ec:4.2.1.24 - synthase, ec:5.4.3.8 - 2,1-aminomutase, ec:1.3.1.33 - reductase, ec:2.1.1.107 - C-methyltransferase, e…
TR95068|c0_g1_i1	Purine metabolism	map00230	60	ec:3.6.1.15 - phosphatase, ec:4.6.1.2 - cyclase, ec:3.2.2.7 - nucleosidase, ec:3.6.1.9 - diphosphatase, ec:1.17.4.1 - reductase, ec:2.7.4.10 - kinase, ec:6.3.3.1 - cyclo-ligase, ec:1.7.3.3 - urate hydroxylase, ec:3.1.3.5 - uridine 5'-nucleotidase, ec:2.7.1.74 - kinase, ec:6.3.2.6 - synthase, ec:3.5.3.9 - deiminase, ec:3.2.2.1 - nucleosidase, ec:1.17.3.2 - oxidase, ec:2.7.4.3 - kinase, ec:3.5.2.17…
TR77745|c0_g1_i3	Terpenoid backbone biosynthesis	map00900	27	ec:2.7.4.2 - kinase, ec:2.5.1.84 - diphosphate synthase [geranyl-diphosphate specific], ec:4.2.3.27 - synthase, ec:1.8.3.5 - oxidase, ec:2.5.1.58 - farnesyltransferase, ec:2.7.1.36 - kinase, ec:1.1.1.34 - reductase (NADPH), ec:2.1.1.100 - O-methyltransferase, ec:4.1.1.33 - decarboxylase, ec:2.5.1.30 - diphosphate synthase, ec:2.5.1.85 - diphosphate synthase [geranylgeranyl-diphosphate specific], …
Mj_1_GCCAAT_L005_R1_001_(paired)_trimmed_(paired)_contig_88028	Glycosylphosphatidylinositol (GPI)-anchor biosynthesis	map00563	2	ec:3.5.1.89 - deacetylase, ec:2.4.1.198 - N-acetylglucosaminyltransferase
TR74940|c0_g1_i6	Indole alkaloid biosynthesis, Starch and sucrose metabolism	map00901, map00500	6, 35	ec:1.14.11.20 - 4-hydroxylase, ec:3.1.1.78 - esterase, ec:2.4.1.219 - glucosyltransferase, ec:4.3.3.2 - synthase, ec:3.2.1.125 - beta-glucosidase, ec:3.2.1.105 - beta-glucosidase, ec:3.2.1.4 - endo-1,4-beta-D-glucanase, ec:3.2.1.26 - invertase, ec:3.6.1.9 - diphosphatase, ec:2.7.7.9 - uridylyltransferase, ec:2.4.1.15 - synthase (UDP-forming), ec:3.2.1.1 - glycogenase, ec:3.2.1.39 - endo-1,3-beta-…
TR77745|c0_g1_i2	Terpenoid backbone biosynthesis	map00900	27	ec:2.7.4.2 - kinase, ec:2.5.1.84 - diphosphate synthase [geranyl-diphosphate specific], ec:4.2.3.27 - synthase, ec:1.8.3.5 - oxidase, ec:2.5.1.58 - farnesyltransferase, ec:2.7.1.36 - kinase, ec:1.1.1.34 - reductase (NADPH), ec:2.1.1.100 - O-methyltransferase, ec:4.1.1.33 - decarboxylase, ec:2.5.1.30 - diphosphate synthase, ec:2.5.1.85 - diphosphate synthase [geranylgeranyl-diphosphate specific], …
Mj_1_GCCAAT_L005_R1_001_(paired)_trimmed_(paired)_contig_106592	Glucosinolate biosynthesis, Cysteine and methionine metabolism, Valine, leucine and isoleucine biosynthesis, Valine, leucine and isoleucine degradation, Pantothenate and CoA biosynthesis	map00966, map00270, map00290, map00280, map00770	3, 45, 9, 21, 19	ec:2.4.1.195 - S-beta-glucosyltransferase, ec:2.6.1.42 - transaminase, ec:2.8.2.24 - desulfoglucosinolate sulfotransferase, ec:1.13.11.53 - dioxygenase (Ni2+-requiring), ec:1.2.1.11 - dehydrogenase, ec:1.13.11.20 - dioxygenase, ec:4.4.1.14 - synthase, ec:2.6.1.57 - transaminase, ec:1.1.1.37 - dehydrogenase, ec:1.14.17.4 - oxidase, ec:2.6.1.5 - transaminase, ec:4.1.1.50 - decarboxylase, ec:2.1.1.1…
TR75812|c0_g1_i10	Porphyrin and chlorophyll metabolism	map00860	31	ec:2.3.1.37 - synthase, ec:3.1.1.14 - CLH, ec:1.3.7.4 - oxidoreductase, ec:4.99.1.4 - ferrochelatase, ec:4.2.1.75 - synthase, ec:3.2.1.31 - beta-glucuronide glucuronohydrolase glucuronidase, ec:4.1.1.37 - decarboxylase, ec:1.3.1.75 - protochlorophyllide a 8-vinyl-reductase (NADPH), ec:4.2.1.24 - synthase, ec:5.4.3.8 - 2,1-aminomutase, ec:1.3.1.33 - reductase, ec:2.1.1.107 - C-methyltransferase, e…
scaffold12307	Starch and sucrose metabolism	map00500	35	ec:3.2.1.4 - endo-1,4-beta-D-glucanase, ec:3.2.1.26 - invertase, ec:3.6.1.9 - diphosphatase, ec:2.7.7.9 - uridylyltransferase, ec:2.4.1.15 - synthase (UDP-forming), ec:3.2.1.1 - glycogenase, ec:3.2.1.39 - endo-1,3-beta-D-glucosidase, ec:2.4.1.21 - synthase (glycosyl-transferring), ec:2.4.1.12 - synthase (UDP-forming), ec:2.7.1.4 - fructokinase (phosphorylating), ec:5.3.1.9 - isomerase, ec:2.4.1.3…
Mj_1_GCCAAT_L005_R1_001_(paired)_trimmed_(paired)_contig_105265	Carbon fixation in photosynthetic organisms, Pyruvate metabolism, Glycolysis / Gluconeogenesis, Citrate cycle (TCA cycle)	map00710, map00620, map00010, map00020	22, 33, 28, 18	ec:5.1.3.1 - 3-epimerase, ec:4.1.1.49 - carboxykinase (ATP), ec:2.7.2.3 - kinase, ec:1.1.1.37 - dehydrogenase, ec:5.3.1.1 - isomerase, ec:2.7.9.1 - phosphate dikinase, ec:2.6.1.1 - transaminase, ec:1.2.1.12 - dehydrogenase (phosphorylating), ec:3.1.3.11 - hexose diphosphatase, ec:5.3.1.6 - isomerase, ec:2.2.1.1 - glycolaldehydetransferase, ec:4.1.2.13 - aldolase, ec:1.1.1.82 - dehydrogenase (NADP…
scaffold13643	Phosphatidylinositol signaling system, Glycerophospholipid metabolism	map04070, map00564	20, 33	ec:2.7.1.127 - 3-kinase, ec:2.7.1.158 - 2-kinase, ec:3.1.3.56 - 5-phosphatase, ec:2.7.1.107 - kinase (ATP), ec:2.7.1.137 - 3-kinase, ec:2.7.1.151 - multikinase, ec:3.1.4.11 - phospholipase C, ec:2.7.1.159 - 5/6-kinase, ec:3.1.3.36 - 5-phosphatase, ec:2.7.11.13 - kinase C, ec:3.1.3.57 - 1-phosphatase, ec:2.7.1.67 - 4-kinase, ec:2.7.8.11 - 3-phosphatidyltransferase, ec:2.7.7.41 - cytidylyltransfera…
Mj_1_GCCAAT_L005_R1_001_(paired)_trimmed_(paired)_contig_106597	Aminobenzoate degradation	map00627	11	ec:1.2.1.28 - dehydrogenase (NAD+), ec:3.5.5.1 - acetonitrilase, ec:1.6.5.7 - reductase, ec:1.14.14.1 - monooxygenase, ec:4.2.1.84 - hydratase, ec:3.1.3.41 - nitrophenyl phosphatase, ec:3.6.1.7 - acetylphosphatase, ec:3.5.1.4 - acylamidase, ec:1.14.13.82 - monooxygenase, ec:2.8.3.8 - CoA-transferase, ec:4.2.1.17 - hydratase
TR116893|c0_g1_i1	Glutathione metabolism, Phenylpropanoid biosynthesis	map00480, map00940	19, 17	ec:1.11.1.11 - peroxidase, ec:1.17.4.1 - reductase, ec:3.5.2.9 - (ATP-hydrolysing), ec:1.8.5.1 - dehydrogenase (ascorbate), ec:1.11.1.15 - to 1.11.1.24 and 1.11.1.25 and 1.11.1.26 and 1.11.1.27 and 1.11.1.28 and 1.11.1.29, ec:1.1.1.42 - dehydrogenase (NADP+), ec:1.11.1.12 - glutathione peroxidase, ec:2.5.1.16 - synthase, ec:6.3.2.2 - ligase, ec:1.8.1.7 - reductase, ec:3.4.19.13 - gamma-glutamate …
TR77745|c0_g1_i5	Terpenoid backbone biosynthesis	map00900	27	ec:2.7.4.2 - kinase, ec:2.5.1.84 - diphosphate synthase [geranyl-diphosphate specific], ec:4.2.3.27 - synthase, ec:1.8.3.5 - oxidase, ec:2.5.1.58 - farnesyltransferase, ec:2.7.1.36 - kinase, ec:1.1.1.34 - reductase (NADPH), ec:2.1.1.100 - O-methyltransferase, ec:4.1.1.33 - decarboxylase, ec:2.5.1.30 - diphosphate synthase, ec:2.5.1.85 - diphosphate synthase [geranylgeranyl-diphosphate specific], …
TR74940|c0_g1_i1	Indole alkaloid biosynthesis, Starch and sucrose metabolism	map00901, map00500	6, 35	ec:1.14.11.20 - 4-hydroxylase, ec:3.1.1.78 - esterase, ec:2.4.1.219 - glucosyltransferase, ec:4.3.3.2 - synthase, ec:3.2.1.125 - beta-glucosidase, ec:3.2.1.105 - beta-glucosidase, ec:3.2.1.4 - endo-1,4-beta-D-glucanase, ec:3.2.1.26 - invertase, ec:3.6.1.9 - diphosphatase, ec:2.7.7.9 - uridylyltransferase, ec:2.4.1.15 - synthase (UDP-forming), ec:3.2.1.1 - glycogenase, ec:3.2.1.39 - endo-1,3-beta-…
TR77745|c0_g1_i7	Terpenoid backbone biosynthesis	map00900	27	ec:2.7.4.2 - kinase, ec:2.5.1.84 - diphosphate synthase [geranyl-diphosphate specific], ec:4.2.3.27 - synthase, ec:1.8.3.5 - oxidase, ec:2.5.1.58 - farnesyltransferase, ec:2.7.1.36 - kinase, ec:1.1.1.34 - reductase (NADPH), ec:2.1.1.100 - O-methyltransferase, ec:4.1.1.33 - decarboxylase, ec:2.5.1.30 - diphosphate synthase, ec:2.5.1.85 - diphosphate synthase [geranylgeranyl-diphosphate specific], …
Mj_1_GCCAAT_L005_R1_001_(paired)_trimmed_(paired)_contig_90340	Carbon fixation in photosynthetic organisms, Pyruvate metabolism, Glyoxylate and dicarboxylate metabolism, Cysteine and methionine metabolism, Methane metabolism, Carbon fixation pathways in prokaryotes, Citrate cycle (TCA cycle)	map00710, map00620, map00630, map00270, map00680, map00720, map00020	22, 33, 34, 45, 23, 21, 18	ec:5.1.3.1 - 3-epimerase, ec:4.1.1.49 - carboxykinase (ATP), ec:2.7.2.3 - kinase, ec:1.1.1.37 - dehydrogenase, ec:5.3.1.1 - isomerase, ec:2.7.9.1 - phosphate dikinase, ec:2.6.1.1 - transaminase, ec:1.2.1.12 - dehydrogenase (phosphorylating), ec:3.1.3.11 - hexose diphosphatase, ec:5.3.1.6 - isomerase, ec:2.2.1.1 - glycolaldehydetransferase, ec:4.1.2.13 - aldolase, ec:1.1.1.82 - dehydrogenase (NADP…
TR65537|c1_g2_i2	Cyanoamino acid metabolism, Starch and sucrose metabolism, Phenylpropanoid biosynthesis	map00460, map00500, map00940	13, 35, 17	ec:3.5.1.49 - ec:3.5.1.49 formamidase, ec:3.5.5.1 - acetonitrilase, ec:3.2.1.118 - beta-glucosidase, ec:2.1.2.1 - hydroxymethyltransferase, ec:4.4.1.9 - synthase, ec:3.2.1.117 - beta-glucosidase, ec:4.2.1.65 - hydratase, ec:3.2.1.21 - gentiobiase, ec:4.1.2.10 - lyase, ec:2.3.2.2 - glutamyl transpeptidase, ec:6.3.1.1 - ligase, ec:3.5.1.1 - asparaginase II, ec:3.5.5.4 - nitrilase, ec:3.2.1.4 - endo…
TR65537|c1_g2_i1	Cyanoamino acid metabolism, Starch and sucrose metabolism, Phenylpropanoid biosynthesis	map00460, map00500, map00940	13, 35, 17	ec:3.5.1.49 - ec:3.5.1.49 formamidase, ec:3.5.5.1 - acetonitrilase, ec:3.2.1.118 - beta-glucosidase, ec:2.1.2.1 - hydroxymethyltransferase, ec:4.4.1.9 - synthase, ec:3.2.1.117 - beta-glucosidase, ec:4.2.1.65 - hydratase, ec:3.2.1.21 - gentiobiase, ec:4.1.2.10 - lyase, ec:2.3.2.2 - glutamyl transpeptidase, ec:6.3.1.1 - ligase, ec:3.5.1.1 - asparaginase II, ec:3.5.5.4 - nitrilase, ec:3.2.1.4 - endo…
TR77745|c0_g1_i8	Terpenoid backbone biosynthesis	map00900	27	ec:2.7.4.2 - kinase, ec:2.5.1.84 - diphosphate synthase [geranyl-diphosphate specific], ec:4.2.3.27 - synthase, ec:1.8.3.5 - oxidase, ec:2.5.1.58 - farnesyltransferase, ec:2.7.1.36 - kinase, ec:1.1.1.34 - reductase (NADPH), ec:2.1.1.100 - O-methyltransferase, ec:4.1.1.33 - decarboxylase, ec:2.5.1.30 - diphosphate synthase, ec:2.5.1.85 - diphosphate synthase [geranylgeranyl-diphosphate specific], …
TR78915|c1_g1_i1	Starch and sucrose metabolism	map00500	35	ec:3.2.1.4 - endo-1,4-beta-D-glucanase, ec:3.2.1.26 - invertase, ec:3.6.1.9 - diphosphatase, ec:2.7.7.9 - uridylyltransferase, ec:2.4.1.15 - synthase (UDP-forming), ec:3.2.1.1 - glycogenase, ec:3.2.1.39 - endo-1,3-beta-D-glucosidase, ec:2.4.1.21 - synthase (glycosyl-transferring), ec:2.4.1.12 - synthase (UDP-forming), ec:2.7.1.4 - fructokinase (phosphorylating), ec:5.3.1.9 - isomerase, ec:2.4.1.3…
Mj_1_GCCAAT_L005_R1_001_(paired)_trimmed_(paired)_contig_107877	Arachidonic acid metabolism, Glutathione metabolism	map00590, map00480	9, 19	ec:1.1.1.189 - 9-reductase, ec:3.3.2.10 - epoxide hydrolase, ec:1.14.14.1 - monooxygenase, ec:1.1.1.184 - reductase (NADPH), ec:5.3.99.2 - synthase, ec:3.3.2.6 - hydrolase, ec:1.11.1.9 - peroxidase, ec:1.14.99.1 - synthase, ec:3.1.1.4 - A2, ec:1.11.1.11 - peroxidase, ec:1.17.4.1 - reductase, ec:3.5.2.9 - (ATP-hydrolysing), ec:1.8.5.1 - dehydrogenase (ascorbate), ec:1.11.1.15 - to 1.11.1.24 and 1.…
TR78915|c1_g1_i2	Starch and sucrose metabolism	map00500	35	ec:3.2.1.4 - endo-1,4-beta-D-glucanase, ec:3.2.1.26 - invertase, ec:3.6.1.9 - diphosphatase, ec:2.7.7.9 - uridylyltransferase, ec:2.4.1.15 - synthase (UDP-forming), ec:3.2.1.1 - glycogenase, ec:3.2.1.39 - endo-1,3-beta-D-glucosidase, ec:2.4.1.21 - synthase (glycosyl-transferring), ec:2.4.1.12 - synthase (UDP-forming), ec:2.7.1.4 - fructokinase (phosphorylating), ec:5.3.1.9 - isomerase, ec:2.4.1.3…
TR78915|c1_g1_i4	Starch and sucrose metabolism	map00500	35	ec:3.2.1.4 - endo-1,4-beta-D-glucanase, ec:3.2.1.26 - invertase, ec:3.6.1.9 - diphosphatase, ec:2.7.7.9 - uridylyltransferase, ec:2.4.1.15 - synthase (UDP-forming), ec:3.2.1.1 - glycogenase, ec:3.2.1.39 - endo-1,3-beta-D-glucosidase, ec:2.4.1.21 - synthase (glycosyl-transferring), ec:2.4.1.12 - synthase (UDP-forming), ec:2.7.1.4 - fructokinase (phosphorylating), ec:5.3.1.9 - isomerase, ec:2.4.1.3…
TR78915|c1_g1_i5	Starch and sucrose metabolism	map00500	35	ec:3.2.1.4 - endo-1,4-beta-D-glucanase, ec:3.2.1.26 - invertase, ec:3.6.1.9 - diphosphatase, ec:2.7.7.9 - uridylyltransferase, ec:2.4.1.15 - synthase (UDP-forming), ec:3.2.1.1 - glycogenase, ec:3.2.1.39 - endo-1,3-beta-D-glucosidase, ec:2.4.1.21 - synthase (glycosyl-transferring), ec:2.4.1.12 - synthase (UDP-forming), ec:2.7.1.4 - fructokinase (phosphorylating), ec:5.3.1.9 - isomerase, ec:2.4.1.3…
TR67605|c0_g1_i4	Flavonoid biosynthesis	map00941	10	ec:1.1.1.234 - 4-reductase, ec:1.17.1.3 - reductase, ec:2.3.1.170 - synthase, ec:2.1.1.104 - O-methyltransferase, ec:2.3.1.74 - synthase, ec:5.5.1.6 - isomerase, ec:1.3.1.77 - reductase [(2R,3R)-flavan-3-ol-forming], ec:1.1.1.219 - 4-reductase, ec:2.3.1.133 - O-hydroxycinnamoyltransferase, ec:1.14.11.9 - 3-dioxygenase
C734939	T cell receptor signaling pathway	map04660	2	ec:2.7.10.2 - protein-tyrosine kinase, ec:3.1.3.16 - phosphatase
TR67605|c0_g1_i1	Flavonoid biosynthesis	map00941	10	ec:1.1.1.234 - 4-reductase, ec:1.17.1.3 - reductase, ec:2.3.1.170 - synthase, ec:2.1.1.104 - O-methyltransferase, ec:2.3.1.74 - synthase, ec:5.5.1.6 - isomerase, ec:1.3.1.77 - reductase [(2R,3R)-flavan-3-ol-forming], ec:1.1.1.219 - 4-reductase, ec:2.3.1.133 - O-hydroxycinnamoyltransferase, ec:1.14.11.9 - 3-dioxygenase
TR67427|c0_g1_i4	Isoquinoline alkaloid biosynthesis, Glycine, serine and threonine metabolism, Phenylalanine metabolism, Tyrosine metabolism, Tropane, piperidine and pyridine alkaloid biosynthesis, beta-Alanine metabolism	map00950, map00260, map00360, map00350, map00960, map00410	17, 39, 22, 26, 11, 17	ec:2.6.1.57 - transaminase, ec:2.1.1.128 - 6-O-methyltransferase, ec:2.6.1.5 - transaminase, ec:4.1.1.28 - decarboxylase, ec:1.1.1.247 - reductase (NADPH), ec:2.6.1.1 - transaminase, ec:2.1.1.116 - 4'-O-methyltransferase, ec:4.1.1.25 - decarboxylase, ec:1.4.3.2 - oxidase, ec:1.14.18.1 - monophenol monooxygenase, ec:1.21.3.3 - oxidase, ec:2.3.1.150 - 7-O-acetyltransferase, ec:1.1.1.248 - reductase…
TR69497|c0_g1_i2	Folate biosynthesis	map00790	17	ec:3.4.19.9 - gamma-glutamyl hydrolase, ec:2.5.1.15 - synthase, ec:1.1.1.21 - reductase, ec:6.3.2.12 - synthase, ec:2.10.1.1 - molybdotransferase, ec:4.2.1.96 - dehydratase, ec:3.5.4.25 - cyclohydrolase II, ec:3.5.4.16 - cyclohydrolase I, ec:6.3.2.17 - synthase, ec:2.7.6.3 - diphosphokinase, ec:2.6.1.85 - synthase, ec:1.1.1.184 - reductase (NADPH), ec:2.7.7.75 - adenylyltransferase, ec:4.1.2.25 -…
TR69497|c0_g1_i1	Folate biosynthesis	map00790	17	ec:3.4.19.9 - gamma-glutamyl hydrolase, ec:2.5.1.15 - synthase, ec:1.1.1.21 - reductase, ec:6.3.2.12 - synthase, ec:2.10.1.1 - molybdotransferase, ec:4.2.1.96 - dehydratase, ec:3.5.4.25 - cyclohydrolase II, ec:3.5.4.16 - cyclohydrolase I, ec:6.3.2.17 - synthase, ec:2.7.6.3 - diphosphokinase, ec:2.6.1.85 - synthase, ec:1.1.1.184 - reductase (NADPH), ec:2.7.7.75 - adenylyltransferase, ec:4.1.2.25 -…
TR77396|c0_g3_i3	Phenylpropanoid biosynthesis	map00940	17	ec:3.2.1.126 - beta-glucosidase, ec:1.1.1.195 - dehydrogenase, ec:1.11.1.7 - lactoperoxidase, ec:2.1.1.146 - O-methyltransferase, ec:1.2.1.68 - dehydrogenase, ec:4.3.1.24 - ammonia-lyase, ec:2.1.1.104 - O-methyltransferase, ec:2.4.1.111 - glucosyltransferase, ec:2.4.1.128 - glucosyltransferase, ec:2.3.1.92 - O-sinapoyltransferase, ec:1.2.1.44 - reductase, ec:2.3.1.99 - O-hydroxycinnamoyltransfera…
TR63093|c0_g1_i2	Pentose and glucuronate interconversions	map00040	20	ec:2.7.1.17 - xylulokinase (phosphorylating), ec:5.1.3.1 - 3-epimerase, ec:5.3.1.5 - isomerase, ec:2.7.7.9 - uridylyltransferase, ec:1.1.1.21 - reductase, ec:3.2.1.31 - beta-glucuronide glucuronohydrolase glucuronidase, ec:1.1.1.12 - 4-dehydrogenase, ec:2.7.7.44 - uridylyltransferase, ec:1.1.1.22 - 6-dehydrogenase, ec:1.1.1.9 - reductase, ec:3.1.1.11 - pectin demethoxylase, ec:3.2.1.15 - pectin d…
TR70447|c1_g1_i2	Thiamine metabolism, Riboflavin metabolism	map00730, map00740	12, 12	ec:3.6.1.15 - phosphatase, ec:2.7.4.7 - kinase, ec:2.8.1.7 - desulfurase, ec:2.7.6.2 - diphosphokinase, ec:2.7.1.50 - kinase, ec:2.7.4.3 - kinase, ec:2.7.1.49 - kinase, ec:3.5.99.2 - aminohydrolase, ec:2.5.1.3 - phosphate synthase, ec:3.1.3.2 - phosphatase, ec:4.1.99.19 - synthase, ec:2.2.1.7 - synthase, ec:3.6.1.9 - diphosphatase, ec:3.5.4.25 - cyclohydrolase II, ec:2.7.7.2 - synthase, ec:1.5.1.…
scaffold12300	alpha-Linolenic acid metabolism, Linoleic acid metabolism	map00592, map00591	11, 3	ec:4.2.1.92 - dehydratase, ec:1.3.3.6 - oxidase, ec:2.3.1.16 - C-acyltransferase, ec:3.1.1.32 - A1, ec:1.3.1.42 - reductase, ec:1.1.1.1 - dehydrogenase, ec:1.13.11.12 - 13S-lipoxygenase, ec:5.3.99.6 - cyclase, ec:4.2.1.17 - hydratase, ec:2.1.1.141 - O-methyltransferase, ec:3.1.1.4 - A2, ec:1.14.14.1 - monooxygenase, ec:1.13.11.12 - 13S-lipoxygenase, ec:3.1.1.4 - A2
TR53263|c0_g1_i1	Sulfur metabolism, Cysteine and methionine metabolism, Selenocompound metabolism	map00920, map00270, map00450	16, 45, 10	ec:1.8.1.2 - sulfite reductase (NADPH), ec:3.6.2.1 - adenosine 5-phosphosulfate sulfohydrolase, ec:1.8.4.9 - reductase (glutathione), ec:1.13.11.18 - dioxygenase, ec:2.3.1.30 - O-acetyltransferase, ec:1.8.7.1 - sulfite reductase (ferredoxin), ec:2.8.1.1 - sulfurtransferase, ec:1.8.99.2 - reductase, ec:2.7.7.4 - adenylyltransferase, ec:2.5.1.47 - synthase, ec:2.7.1.25 - kinase, ec:3.1.3.7 - nucleo…
scaffold13629	T cell receptor signaling pathway, Th1 and Th2 cell differentiation, PD-L1 expression and PD-1 checkpoint pathway in cancer	map04660, map04658, map05235	2, 1, 1	ec:2.7.10.2 - protein-tyrosine kinase, ec:3.1.3.16 - phosphatase, ec:3.1.3.16 - phosphatase, ec:3.1.3.16 - phosphatase
TR67605|c0_g1_i7	Flavonoid biosynthesis	map00941	10	ec:1.1.1.234 - 4-reductase, ec:1.17.1.3 - reductase, ec:2.3.1.170 - synthase, ec:2.1.1.104 - O-methyltransferase, ec:2.3.1.74 - synthase, ec:5.5.1.6 - isomerase, ec:1.3.1.77 - reductase [(2R,3R)-flavan-3-ol-forming], ec:1.1.1.219 - 4-reductase, ec:2.3.1.133 - O-hydroxycinnamoyltransferase, ec:1.14.11.9 - 3-dioxygenase
TR67605|c0_g1_i6	Steroid hormone biosynthesis, Steroid degradation, Flavonoid biosynthesis	map00140, map00984, map00941	12, 3, 10	ec:1.1.1.51 - 17)beta-hydroxysteroid dehydrogenase, ec:1.14.14.1 - monooxygenase, ec:1.3.1.3 - 5beta-reductase, ec:2.1.1.6 - O-methyltransferase, ec:1.1.1.145 - dehydrogenase, ec:1.1.1.62 - 17-dehydrogenase, ec:2.4.1.17 - 1-naphthol glucuronyltransferase, ec:1.1.1.53 - 20beta)-hydroxysteroid dehydrogenase, ec:1.1.1.149 - dehydrogenase, ec:1.3.1.22 - 4-dehydrogenase (NADP+), ec:1.1.1.146 - dehydro…
TR51377|c0_g1_i1	Fluorobenzoate degradation, Cyanoamino acid metabolism, Styrene degradation, Aminobenzoate degradation, Tryptophan metabolism	map00364, map00460, map00643, map00627, map00380	4, 13, 6, 11, 29	ec:4.2.1.84 - hydratase, ec:5.5.1.1 - cycloisomerase, ec:3.1.1.45 - maleylacetate enol-lactonase, ec:1.13.11.1 - 1,2-dioxygenase, ec:3.5.1.49 - ec:3.5.1.49 formamidase, ec:3.5.5.1 - acetonitrilase, ec:3.2.1.118 - beta-glucosidase, ec:2.1.2.1 - hydroxymethyltransferase, ec:4.4.1.9 - synthase, ec:3.2.1.117 - beta-glucosidase, ec:4.2.1.65 - hydratase, ec:3.2.1.21 - gentiobiase, ec:4.1.2.10 - lyase, …
TR78915|c1_g1_i8	Starch and sucrose metabolism	map00500	35	ec:3.2.1.4 - endo-1,4-beta-D-glucanase, ec:3.2.1.26 - invertase, ec:3.6.1.9 - diphosphatase, ec:2.7.7.9 - uridylyltransferase, ec:2.4.1.15 - synthase (UDP-forming), ec:3.2.1.1 - glycogenase, ec:3.2.1.39 - endo-1,3-beta-D-glucosidase, ec:2.4.1.21 - synthase (glycosyl-transferring), ec:2.4.1.12 - synthase (UDP-forming), ec:2.7.1.4 - fructokinase (phosphorylating), ec:5.3.1.9 - isomerase, ec:2.4.1.3…
TR63544|c0_g1_i2	N-Glycan biosynthesis, Various types of N-glycan biosynthesis	map00510, map00513	18, 15	ec:2.4.1.101 - 2-beta-N-acetylglucosaminyltransferase, ec:2.4.1.117 - beta-glucosyltransferase, ec:2.4.1.259 - alpha-1,2-mannosyltransferase, ec:2.4.1.131 - alpha-1,2-mannosyltransferase, ec:2.4.1.144 - 4-beta-N-acetylglucosaminyltransferase, ec:2.4.1.261 - alpha-1,2-mannosyltransferase, ec:3.2.1.106 - glucosidase, ec:2.4.1.132 - alpha-1,3-mannosyltransferase, ec:3.6.1.43 - dolichol diphosphatase…
C959056	T cell receptor signaling pathway	map04660	2	ec:2.7.10.2 - protein-tyrosine kinase, ec:3.1.3.16 - phosphatase
TR41725|c0_g1_i2	Glutathione metabolism, Carbon fixation pathways in prokaryotes, Citrate cycle (TCA cycle)	map00480, map00720, map00020	19, 21, 18	ec:1.11.1.11 - peroxidase, ec:1.17.4.1 - reductase, ec:3.5.2.9 - (ATP-hydrolysing), ec:1.8.5.1 - dehydrogenase (ascorbate), ec:1.11.1.15 - to 1.11.1.24 and 1.11.1.25 and 1.11.1.26 and 1.11.1.27 and 1.11.1.28 and 1.11.1.29, ec:1.1.1.42 - dehydrogenase (NADP+), ec:1.11.1.12 - glutathione peroxidase, ec:2.5.1.16 - synthase, ec:6.3.2.2 - ligase, ec:1.8.1.7 - reductase, ec:3.4.19.13 - gamma-glutamate …
TR75082|c0_g1_i2	Purine metabolism	map00230	60	ec:3.6.1.15 - phosphatase, ec:4.6.1.2 - cyclase, ec:3.2.2.7 - nucleosidase, ec:3.6.1.9 - diphosphatase, ec:1.17.4.1 - reductase, ec:2.7.4.10 - kinase, ec:6.3.3.1 - cyclo-ligase, ec:1.7.3.3 - urate hydroxylase, ec:3.1.3.5 - uridine 5'-nucleotidase, ec:2.7.1.74 - kinase, ec:6.3.2.6 - synthase, ec:3.5.3.9 - deiminase, ec:3.2.2.1 - nucleosidase, ec:1.17.3.2 - oxidase, ec:2.7.4.3 - kinase, ec:3.5.2.17…
Mj_1_GCCAAT_L005_R1_001_(paired)_trimmed_(paired)_contig_106537	Sulfur metabolism, Cysteine and methionine metabolism	map00920, map00270	16, 45	ec:1.8.1.2 - sulfite reductase (NADPH), ec:3.6.2.1 - adenosine 5-phosphosulfate sulfohydrolase, ec:1.8.4.9 - reductase (glutathione), ec:1.13.11.18 - dioxygenase, ec:2.3.1.30 - O-acetyltransferase, ec:1.8.7.1 - sulfite reductase (ferredoxin), ec:2.8.1.1 - sulfurtransferase, ec:1.8.99.2 - reductase, ec:2.7.7.4 - adenylyltransferase, ec:2.5.1.47 - synthase, ec:2.7.1.25 - kinase, ec:3.1.3.7 - nucleo…
TR77977|c0_g2_i1	Starch and sucrose metabolism	map00500	35	ec:3.2.1.4 - endo-1,4-beta-D-glucanase, ec:3.2.1.26 - invertase, ec:3.6.1.9 - diphosphatase, ec:2.7.7.9 - uridylyltransferase, ec:2.4.1.15 - synthase (UDP-forming), ec:3.2.1.1 - glycogenase, ec:3.2.1.39 - endo-1,3-beta-D-glucosidase, ec:2.4.1.21 - synthase (glycosyl-transferring), ec:2.4.1.12 - synthase (UDP-forming), ec:2.7.1.4 - fructokinase (phosphorylating), ec:5.3.1.9 - isomerase, ec:2.4.1.3…
Mj_1_GCCAAT_L005_R1_001_(paired)_trimmed_(paired)_contig_105208	Drug metabolism - other enzymes, Pyrimidine metabolism	map00983, map00240	19, 31	ec:2.7.1.48 - kinase, ec:3.5.2.2 - hydantoinase, ec:3.1.1.1 - ali-esterase, ec:1.17.4.1 - reductase, ec:1.3.1.2 - dehydrogenase (NADP+), ec:3.5.1.6 - N-carbamoyl-beta-alanine amidohydrolase, ec:3.2.1.31 - beta-glucuronide glucuronohydrolase glucuronidase, ec:3.5.4.5 - deaminase, ec:1.17.3.2 - oxidase, ec:2.7.4.14 - kinase, ec:1.1.1.205 - dehydrogenase, ec:2.4.2.10 - phosphoribosyltransferase, ec:…
scaffold13613	Pentose phosphate pathway, Amino sugar and nucleotide sugar metabolism, Fructose and mannose metabolism, Starch and sucrose metabolism	map00030, map00520, map00051, map00500	21, 46, 27, 35	ec:5.1.3.1 - 3-epimerase, ec:2.7.1.11 - phosphohexokinase, ec:5.3.1.9 - isomerase, ec:3.1.3.11 - hexose diphosphatase, ec:1.1.1.47 - 1-dehydrogenase [NAD(P)+], ec:5.3.1.6 - isomerase, ec:2.7.1.15 - deoxyribokinase, ec:2.2.1.1 - glycolaldehydetransferase, ec:4.1.2.13 - aldolase, ec:2.7.1.12 - gluconokinase (phosphorylating), ec:2.7.1.90 - 1-phosphotransferase, ec:5.4.2.2 - (alpha-D-glucose-1,6-bis…
scaffold13614	Amino sugar and nucleotide sugar metabolism, Fructose and mannose metabolism, Starch and sucrose metabolism	map00520, map00051, map00500	46, 27, 35	ec:5.1.3.2 - 4-epimerase, ec:2.4.2.24 - synthase, ec:2.7.7.9 - uridylyltransferase, ec:2.7.1.7 - mannokinase (phosphorylating), ec:5.4.2.8 - mannose phosphomutase, ec:2.7.1.44 - galacturonokinase (phosphorylating) D-galacturonic acid kinase, ec:2.7.7.22 - guanylyltransferase (GDP), ec:5.1.3.6 - 4-epimerase, ec:3.2.1.14 - ChiC, ec:2.7.7.13 - guanylyltransferase, ec:5.1.3.12 - 5'-epimerase, ec:2.7.…
TR76937|c0_g1_i3	T cell receptor signaling pathway	map04660	2	ec:2.7.10.2 - protein-tyrosine kinase, ec:3.1.3.16 - phosphatase
TR99386|c0_g1_i1	Drug metabolism - cytochrome P450	map00982	7	ec:1.14.14.1 - monooxygenase, ec:1.1.1.1 - dehydrogenase, ec:1.2.1.5 - dehydrogenase [NAD(P)+], ec:1.2.3.1 - oxidase, ec:2.4.1.17 - 1-naphthol glucuronyltransferase, ec:1.14.13.8 - monooxygenase, ec:2.5.1.18 - transferase
TR76937|c0_g1_i7	T cell receptor signaling pathway	map04660	2	ec:2.7.10.2 - protein-tyrosine kinase, ec:3.1.3.16 - phosphatase
TR105132|c0_g1_i1	Starch and sucrose metabolism	map00500	35	ec:3.2.1.4 - endo-1,4-beta-D-glucanase, ec:3.2.1.26 - invertase, ec:3.6.1.9 - diphosphatase, ec:2.7.7.9 - uridylyltransferase, ec:2.4.1.15 - synthase (UDP-forming), ec:3.2.1.1 - glycogenase, ec:3.2.1.39 - endo-1,3-beta-D-glucosidase, ec:2.4.1.21 - synthase (glycosyl-transferring), ec:2.4.1.12 - synthase (UDP-forming), ec:2.7.1.4 - fructokinase (phosphorylating), ec:5.3.1.9 - isomerase, ec:2.4.1.3…
C972022	Aminoacyl-tRNA biosynthesis	map00970	23	ec:6.1.1.22 - ligase, ec:6.1.1.3 - ligase, ec:6.1.1.10 - ligase, ec:6.1.1.18 - ligase, ec:6.1.1.7 - ligase, ec:6.1.1.23 - ligase, ec:6.1.1.14 - ligase, ec:6.1.1.4 - ligase, ec:6.1.1.20 - ligase, ec:6.1.1.11 - ligase, ec:6.1.1.1 - ligase, ec:6.1.1.19 - ligase, ec:2.1.2.9 - formyltransferase, ec:6.1.1.9 - ligase, ec:6.1.1.15 - ligase, ec:6.1.1.5 - ligase, ec:6.1.1.21 - ligase, ec:6.1.1.12 - ligase,…
TR34463|c0_g1_i2	Starch and sucrose metabolism	map00500	35	ec:3.2.1.4 - endo-1,4-beta-D-glucanase, ec:3.2.1.26 - invertase, ec:3.6.1.9 - diphosphatase, ec:2.7.7.9 - uridylyltransferase, ec:2.4.1.15 - synthase (UDP-forming), ec:3.2.1.1 - glycogenase, ec:3.2.1.39 - endo-1,3-beta-D-glucosidase, ec:2.4.1.21 - synthase (glycosyl-transferring), ec:2.4.1.12 - synthase (UDP-forming), ec:2.7.1.4 - fructokinase (phosphorylating), ec:5.3.1.9 - isomerase, ec:2.4.1.3…
TR34463|c0_g1_i3	Starch and sucrose metabolism	map00500	35	ec:3.2.1.4 - endo-1,4-beta-D-glucanase, ec:3.2.1.26 - invertase, ec:3.6.1.9 - diphosphatase, ec:2.7.7.9 - uridylyltransferase, ec:2.4.1.15 - synthase (UDP-forming), ec:3.2.1.1 - glycogenase, ec:3.2.1.39 - endo-1,3-beta-D-glucosidase, ec:2.4.1.21 - synthase (glycosyl-transferring), ec:2.4.1.12 - synthase (UDP-forming), ec:2.7.1.4 - fructokinase (phosphorylating), ec:5.3.1.9 - isomerase, ec:2.4.1.3…
TR66781|c0_g1_i1	Terpenoid backbone biosynthesis	map00900	27	ec:2.7.4.2 - kinase, ec:2.5.1.84 - diphosphate synthase [geranyl-diphosphate specific], ec:4.2.3.27 - synthase, ec:1.8.3.5 - oxidase, ec:2.5.1.58 - farnesyltransferase, ec:2.7.1.36 - kinase, ec:1.1.1.34 - reductase (NADPH), ec:2.1.1.100 - O-methyltransferase, ec:4.1.1.33 - decarboxylase, ec:2.5.1.30 - diphosphate synthase, ec:2.5.1.85 - diphosphate synthase [geranylgeranyl-diphosphate specific], …
TR75932|c1_g1_i2	Phosphatidylinositol signaling system	map04070	20	ec:2.7.1.127 - 3-kinase, ec:2.7.1.158 - 2-kinase, ec:3.1.3.56 - 5-phosphatase, ec:2.7.1.107 - kinase (ATP), ec:2.7.1.137 - 3-kinase, ec:2.7.1.151 - multikinase, ec:3.1.4.11 - phospholipase C, ec:2.7.1.159 - 5/6-kinase, ec:3.1.3.36 - 5-phosphatase, ec:2.7.11.13 - kinase C, ec:3.1.3.57 - 1-phosphatase, ec:2.7.1.67 - 4-kinase, ec:2.7.8.11 - 3-phosphatidyltransferase, ec:2.7.7.41 - cytidylyltransfera…
TR75932|c1_g1_i3	Phosphatidylinositol signaling system	map04070	20	ec:2.7.1.127 - 3-kinase, ec:2.7.1.158 - 2-kinase, ec:3.1.3.56 - 5-phosphatase, ec:2.7.1.107 - kinase (ATP), ec:2.7.1.137 - 3-kinase, ec:2.7.1.151 - multikinase, ec:3.1.4.11 - phospholipase C, ec:2.7.1.159 - 5/6-kinase, ec:3.1.3.36 - 5-phosphatase, ec:2.7.11.13 - kinase C, ec:3.1.3.57 - 1-phosphatase, ec:2.7.1.67 - 4-kinase, ec:2.7.8.11 - 3-phosphatidyltransferase, ec:2.7.7.41 - cytidylyltransfera…
TR66781|c0_g1_i3	Terpenoid backbone biosynthesis	map00900	27	ec:2.7.4.2 - kinase, ec:2.5.1.84 - diphosphate synthase [geranyl-diphosphate specific], ec:4.2.3.27 - synthase, ec:1.8.3.5 - oxidase, ec:2.5.1.58 - farnesyltransferase, ec:2.7.1.36 - kinase, ec:1.1.1.34 - reductase (NADPH), ec:2.1.1.100 - O-methyltransferase, ec:4.1.1.33 - decarboxylase, ec:2.5.1.30 - diphosphate synthase, ec:2.5.1.85 - diphosphate synthase [geranylgeranyl-diphosphate specific], …
TR66781|c0_g1_i2	Terpenoid backbone biosynthesis	map00900	27	ec:2.7.4.2 - kinase, ec:2.5.1.84 - diphosphate synthase [geranyl-diphosphate specific], ec:4.2.3.27 - synthase, ec:1.8.3.5 - oxidase, ec:2.5.1.58 - farnesyltransferase, ec:2.7.1.36 - kinase, ec:1.1.1.34 - reductase (NADPH), ec:2.1.1.100 - O-methyltransferase, ec:4.1.1.33 - decarboxylase, ec:2.5.1.30 - diphosphate synthase, ec:2.5.1.85 - diphosphate synthase [geranylgeranyl-diphosphate specific], …
Mj_1_GCCAAT_L005_R1_001_(paired)_trimmed_(paired)_contig_107899	Starch and sucrose metabolism	map00500	35	ec:3.2.1.4 - endo-1,4-beta-D-glucanase, ec:3.2.1.26 - invertase, ec:3.6.1.9 - diphosphatase, ec:2.7.7.9 - uridylyltransferase, ec:2.4.1.15 - synthase (UDP-forming), ec:3.2.1.1 - glycogenase, ec:3.2.1.39 - endo-1,3-beta-D-glucosidase, ec:2.4.1.21 - synthase (glycosyl-transferring), ec:2.4.1.12 - synthase (UDP-forming), ec:2.7.1.4 - fructokinase (phosphorylating), ec:5.3.1.9 - isomerase, ec:2.4.1.3…
Mj_1_GCCAAT_L005_R1_001_(paired)_trimmed_(paired)_contig_90376	Pyruvate metabolism, Propanoate metabolism, Glyoxylate and dicarboxylate metabolism, Methane metabolism, Carbon fixation pathways in prokaryotes, Glycolysis / Gluconeogenesis	map00620, map00640, map00630, map00680, map00720, map00010	33, 21, 34, 23, 21, 28	ec:4.1.1.32 - carboxykinase (GTP), ec:1.2.1.3 - dehydrogenase (NAD+), ec:1.1.1.79 - reductase (NADP+), ec:4.1.1.49 - carboxykinase (ATP), ec:2.3.1.12 - acetyltransferase, ec:1.1.2.3 - dehydrogenase (cytochrome), ec:1.1.1.37 - dehydrogenase, ec:1.1.1.28 - dehydrogenase, ec:3.1.2.1 - hydrolase, ec:2.7.9.1 - phosphate dikinase, ec:6.4.1.2 - carboxylase, ec:1.1.2.4 - dehydrogenase (cytochrome), ec:3.…
TR75948|c0_g1_i1	Glycerolipid metabolism, Cutin, suberine and wax biosynthesis	map00561, map00073	24, 4	ec:2.3.1.20 - O-acyltransferase, ec:1.2.1.3 - dehydrogenase (NAD+), ec:2.7.1.31 - 3-kinase, ec:2.3.1.51 - O-acyltransferase, ec:2.7.7.9 - uridylyltransferase, ec:1.1.1.21 - reductase, ec:2.4.1.46 - synthase, ec:3.2.1.22 - melibiase, ec:2.7.1.107 - kinase (ATP), ec:3.1.1.23 - lipase, ec:2.3.1.22 - O-acyltransferase, ec:2.4.1.241 - synthase, ec:3.13.1.1 - synthase, ec:2.4.1.184 - galactosyltransfer…
Mj_1_GCCAAT_L005_R1_001_(paired)_trimmed_(paired)_contig_89383	Pyrimidine metabolism	map00240	31	ec:2.4.2.9 - phosphoribosyltransferase, ec:2.7.1.48 - kinase, ec:3.5.2.2 - hydantoinase, ec:3.6.1.9 - diphosphatase, ec:1.17.4.1 - reductase, ec:1.3.1.2 - dehydrogenase (NADP+), ec:3.5.1.6 - N-carbamoyl-beta-alanine amidohydrolase, ec:3.5.4.12 - deaminase, ec:3.5.4.5 - deaminase, ec:3.1.3.5 - uridine 5'-nucleotidase, ec:2.7.1.74 - kinase, ec:6.3.5.5 - synthase (glutamine-hydrolysing), ec:2.7.4.14…
Mj_1_GCCAAT_L005_R1_001_(paired)_trimmed_(paired)_contig_89381	Glycine, serine and threonine metabolism, Glyoxylate and dicarboxylate metabolism, Methane metabolism	map00260, map00630, map00680	39, 34, 23	ec:2.3.1.37 - synthase, ec:2.7.1.31 - 3-kinase, ec:1.2.1.11 - dehydrogenase, ec:4.3.1.18 - ammonia-lyase, ec:4.1.2.5 - aldolase, ec:2.7.1.39 - kinase, ec:2.1.2.1 - hydroxymethyltransferase, ec:1.1.1.81 - reductase, ec:2.1.1.5 - S-methyltransferase, ec:2.6.1.45 - transaminase, ec:1.5.3.10 - oxidase, ec:2.1.2.10 - S-aminomethyldihydrolipoylprotein:(6S)-tetrahydrofolate aminomethyltransferase (ammon…
Mj_1_GCCAAT_L005_R1_001_(paired)_trimmed_(paired)_contig_106560	Phenylpropanoid biosynthesis	map00940	17	ec:3.2.1.126 - beta-glucosidase, ec:1.1.1.195 - dehydrogenase, ec:1.11.1.7 - lactoperoxidase, ec:2.1.1.146 - O-methyltransferase, ec:1.2.1.68 - dehydrogenase, ec:4.3.1.24 - ammonia-lyase, ec:2.1.1.104 - O-methyltransferase, ec:2.4.1.111 - glucosyltransferase, ec:2.4.1.128 - glucosyltransferase, ec:2.3.1.92 - O-sinapoyltransferase, ec:1.2.1.44 - reductase, ec:2.3.1.99 - O-hydroxycinnamoyltransfera…
TR66781|c0_g1_i4	Terpenoid backbone biosynthesis	map00900	27	ec:2.7.4.2 - kinase, ec:2.5.1.84 - diphosphate synthase [geranyl-diphosphate specific], ec:4.2.3.27 - synthase, ec:1.8.3.5 - oxidase, ec:2.5.1.58 - farnesyltransferase, ec:2.7.1.36 - kinase, ec:1.1.1.34 - reductase (NADPH), ec:2.1.1.100 - O-methyltransferase, ec:4.1.1.33 - decarboxylase, ec:2.5.1.30 - diphosphate synthase, ec:2.5.1.85 - diphosphate synthase [geranylgeranyl-diphosphate specific], …
Mj_1_GCCAAT_L005_R1_001_(paired)_trimmed_(paired)_contig_106565	Pentose and glucuronate interconversions	map00040	20	ec:2.7.1.17 - xylulokinase (phosphorylating), ec:5.1.3.1 - 3-epimerase, ec:5.3.1.5 - isomerase, ec:2.7.7.9 - uridylyltransferase, ec:1.1.1.21 - reductase, ec:3.2.1.31 - beta-glucuronide glucuronohydrolase glucuronidase, ec:1.1.1.12 - 4-dehydrogenase, ec:2.7.7.44 - uridylyltransferase, ec:1.1.1.22 - 6-dehydrogenase, ec:1.1.1.9 - reductase, ec:3.1.1.11 - pectin demethoxylase, ec:3.2.1.15 - pectin d…
TR17822|c0_g1_i1	Pyruvate metabolism, Histidine metabolism, Chloroalkane and chloroalkene degradation, Ascorbate and aldarate metabolism, Lysine degradation, Fatty acid degradation, Arginine and proline metabolism, Limonene and pinene degradation, Tryptophan metabolism, Glycerolipid metabolism, beta-Alanine metabolism, Valine, leucine and isoleucine degradation, Glycolysis / Gluconeogenesis, Insect hormone biosyn…	map00620, map00340, map00625, map00053, map00310, map00071, map00330, map00903, map00380, map00561, map00410, map00280, map00010, map00981	33, 13, 5, 18, 12, 14, 28, 2, 29, 24, 17, 21, 28, 2	ec:4.1.1.32 - carboxykinase (GTP), ec:1.2.1.3 - dehydrogenase (NAD+), ec:1.1.1.79 - reductase (NADP+), ec:4.1.1.49 - carboxykinase (ATP), ec:2.3.1.12 - acetyltransferase, ec:1.1.2.3 - dehydrogenase (cytochrome), ec:1.1.1.37 - dehydrogenase, ec:1.1.1.28 - dehydrogenase, ec:3.1.2.1 - hydrolase, ec:2.7.9.1 - phosphate dikinase, ec:6.4.1.2 - carboxylase, ec:1.1.2.4 - dehydrogenase (cytochrome), ec:3.…
TR66079|c0_g1_i1	Purine metabolism, Pentose phosphate pathway	map00230, map00030	60, 21	ec:3.6.1.15 - phosphatase, ec:4.6.1.2 - cyclase, ec:3.2.2.7 - nucleosidase, ec:3.6.1.9 - diphosphatase, ec:1.17.4.1 - reductase, ec:2.7.4.10 - kinase, ec:6.3.3.1 - cyclo-ligase, ec:1.7.3.3 - urate hydroxylase, ec:3.1.3.5 - uridine 5'-nucleotidase, ec:2.7.1.74 - kinase, ec:6.3.2.6 - synthase, ec:3.5.3.9 - deiminase, ec:3.2.2.1 - nucleosidase, ec:1.17.3.2 - oxidase, ec:2.7.4.3 - kinase, ec:3.5.2.17…
TR130837|c0_g1_i1	Glyoxylate and dicarboxylate metabolism, Carbon fixation pathways in prokaryotes, Citrate cycle (TCA cycle)	map00630, map00720, map00020	34, 21, 18	ec:3.5.1.9 - kynurenine formamidase, ec:4.1.3.1 - lyase, ec:1.1.1.79 - reductase (NADP+), ec:2.7.1.31 - 3-kinase, ec:3.5.1.49 - ec:3.5.1.49 formamidase, ec:4.1.1.2 - decarboxylase, ec:1.1.1.60 - reductase, ec:3.1.3.18 - phosphatase, ec:1.1.1.37 - dehydrogenase, ec:1.1.99.14 - dehydrogenase, ec:2.1.2.1 - hydroxymethyltransferase, ec:1.1.1.81 - reductase, ec:6.3.1.2 - synthetase, ec:2.6.1.45 - tran…
TR68778|c0_g1_i1	alpha-Linolenic acid metabolism, Lysine degradation, Fatty acid degradation, Aminobenzoate degradation, Limonene and pinene degradation, Tryptophan metabolism, Caprolactam degradation, Geraniol degradation, Propanoate metabolism, Phenylalanine metabolism, Benzoate degradation, beta-Alanine metabolism, Valine, leucine and isoleucine degradation, Butanoate metabolism, Fatty acid elongation, Carbon …	map00592, map00310, map00071, map00627, map00903, map00380, map00930, map00281, map00640, map00360, map00362, map00410, map00280, map00650, map00062, map00720	11, 12, 14, 11, 2, 29, 8, 4, 21, 22, 10, 17, 21, 19, 7, 21	ec:4.2.1.92 - dehydratase, ec:1.3.3.6 - oxidase, ec:2.3.1.16 - C-acyltransferase, ec:3.1.1.32 - A1, ec:1.3.1.42 - reductase, ec:1.1.1.1 - dehydrogenase, ec:1.13.11.12 - 13S-lipoxygenase, ec:5.3.99.6 - cyclase, ec:4.2.1.17 - hydratase, ec:2.1.1.141 - O-methyltransferase, ec:3.1.1.4 - A2, ec:1.2.1.3 - dehydrogenase (NAD+), ec:1.5.1.10 - dehydrogenase (NADP+, L-glutamate-forming), ec:1.2.4.2 - dehyd…
Mj_1_GCCAAT_L005_R1_001_(paired)_trimmed_(paired)_contig_107887	Galactose metabolism, Starch and sucrose metabolism	map00052, map00500	20, 35	ec:5.1.3.2 - 4-epimerase, ec:3.2.1.26 - invertase, ec:2.7.7.9 - uridylyltransferase, ec:1.1.1.21 - reductase, ec:3.2.1.23 - lactase (ambiguous), ec:3.2.1.22 - melibiase, ec:2.7.1.11 - phosphohexokinase, ec:2.4.1.67 - galactosyltransferase, ec:5.1.3.3 - 1-epimerase, ec:2.7.7.10 - uridylyltransferase, ec:2.7.1.1 - hexokinase type IV glucokinase, ec:2.4.1.123 - 3-alpha-galactosyltransferase, ec:2.4.…
C732301	Folate biosynthesis, Fructose and mannose metabolism, Arachidonic acid metabolism, Metabolism of xenobiotics by cytochrome P450, Pentose and glucuronate interconversions	map00790, map00051, map00590, map00980, map00040	17, 27, 9, 8, 20	ec:3.4.19.9 - gamma-glutamyl hydrolase, ec:2.5.1.15 - synthase, ec:1.1.1.21 - reductase, ec:6.3.2.12 - synthase, ec:2.10.1.1 - molybdotransferase, ec:4.2.1.96 - dehydratase, ec:3.5.4.25 - cyclohydrolase II, ec:3.5.4.16 - cyclohydrolase I, ec:6.3.2.17 - synthase, ec:2.7.6.3 - diphosphokinase, ec:2.6.1.85 - synthase, ec:1.1.1.184 - reductase (NADPH), ec:2.7.7.75 - adenylyltransferase, ec:4.1.2.25 -…
TR75237|c0_g3_i6	Starch and sucrose metabolism	map00500	35	ec:3.2.1.4 - endo-1,4-beta-D-glucanase, ec:3.2.1.26 - invertase, ec:3.6.1.9 - diphosphatase, ec:2.7.7.9 - uridylyltransferase, ec:2.4.1.15 - synthase (UDP-forming), ec:3.2.1.1 - glycogenase, ec:3.2.1.39 - endo-1,3-beta-D-glucosidase, ec:2.4.1.21 - synthase (glycosyl-transferring), ec:2.4.1.12 - synthase (UDP-forming), ec:2.7.1.4 - fructokinase (phosphorylating), ec:5.3.1.9 - isomerase, ec:2.4.1.3…
Mj_1_GCCAAT_L005_R1_001_(paired)_trimmed_(paired)_contig_106551	Methane metabolism, Glycolysis / Gluconeogenesis	map00680, map00010	23, 28	ec:2.2.1.3 - transketolase, ec:4.4.1.22 - synthase, ec:4.2.1.11 - hydratase, ec:1.1.1.37 - dehydrogenase, ec:2.1.2.1 - hydroxymethyltransferase, ec:2.7.1.11 - phosphohexokinase, ec:2.6.1.45 - transaminase, ec:1.2.1.46 - dehydrogenase, ec:4.1.1.25 - decarboxylase, ec:3.1.3.11 - hexose diphosphatase, ec:1.1.3.13 - oxidase, ec:4.1.2.13 - aldolase, ec:1.1.1.29 - dehydrogenase, ec:6.2.1.1 - ligase, ec…
TR81790|c0_g1_i1	Glyoxylate and dicarboxylate metabolism, Citrate cycle (TCA cycle)	map00630, map00020	34, 18	ec:3.5.1.9 - kynurenine formamidase, ec:4.1.3.1 - lyase, ec:1.1.1.79 - reductase (NADP+), ec:2.7.1.31 - 3-kinase, ec:3.5.1.49 - ec:3.5.1.49 formamidase, ec:4.1.1.2 - decarboxylase, ec:1.1.1.60 - reductase, ec:3.1.3.18 - phosphatase, ec:1.1.1.37 - dehydrogenase, ec:1.1.99.14 - dehydrogenase, ec:2.1.2.1 - hydroxymethyltransferase, ec:1.1.1.81 - reductase, ec:6.3.1.2 - synthetase, ec:2.6.1.45 - tran…
Mj_1_GCCAAT_L005_R1_001_(paired)_trimmed_(paired)_contig_89397	Methane metabolism	map00680	23	ec:2.2.1.3 - transketolase, ec:4.4.1.22 - synthase, ec:4.2.1.11 - hydratase, ec:1.1.1.37 - dehydrogenase, ec:2.1.2.1 - hydroxymethyltransferase, ec:2.7.1.11 - phosphohexokinase, ec:2.6.1.45 - transaminase, ec:1.2.1.46 - dehydrogenase, ec:4.1.1.25 - decarboxylase, ec:3.1.3.11 - hexose diphosphatase, ec:1.1.3.13 - oxidase, ec:4.1.2.13 - aldolase, ec:1.1.1.29 - dehydrogenase, ec:6.2.1.1 - ligase, ec…
Mj_1_GCCAAT_L005_R1_001_(paired)_trimmed_(paired)_contig_105221	Alanine, aspartate and glutamate metabolism, Glycine, serine and threonine metabolism, Cysteine and methionine metabolism	map00250, map00260, map00270	29, 39, 45	ec:1.4.1.14 - synthase (NADH), ec:4.1.1.15 - decarboxylase, ec:6.3.4.5 - synthase, ec:1.4.1.2 - dehydrogenase, ec:1.2.1.24 - dehydrogenase (NAD+), ec:6.3.1.2 - synthetase, ec:3.5.1.3 - alpha-keto acid-omega-amidase, ec:1.2.1.16 - dehydrogenase [NAD(P)+], ec:6.3.4.16 - synthase (ammonia), ec:6.3.5.5 - synthase (glutamine-hydrolysing), ec:2.6.1.1 - transaminase, ec:4.3.2.1 - lyase, ec:1.4.3.2 - oxi…
TR73457|c2_g2_i11	Amino sugar and nucleotide sugar metabolism, Galactose metabolism, Fructose and mannose metabolism, Starch and sucrose metabolism, Neomycin, kanamycin and gentamicin biosynthesis, Streptomycin biosynthesis, Glycolysis / Gluconeogenesis	map00520, map00052, map00051, map00500, map00524, map00521, map00010	46, 20, 27, 35, 2, 10, 28	ec:5.1.3.2 - 4-epimerase, ec:2.4.2.24 - synthase, ec:2.7.7.9 - uridylyltransferase, ec:2.7.1.7 - mannokinase (phosphorylating), ec:5.4.2.8 - mannose phosphomutase, ec:2.7.1.44 - galacturonokinase (phosphorylating) D-galacturonic acid kinase, ec:2.7.7.22 - guanylyltransferase (GDP), ec:5.1.3.6 - 4-epimerase, ec:3.2.1.14 - ChiC, ec:2.7.7.13 - guanylyltransferase, ec:5.1.3.12 - 5'-epimerase, ec:2.7.…
TR75237|c0_g3_i1	Starch and sucrose metabolism	map00500	35	ec:3.2.1.4 - endo-1,4-beta-D-glucanase, ec:3.2.1.26 - invertase, ec:3.6.1.9 - diphosphatase, ec:2.7.7.9 - uridylyltransferase, ec:2.4.1.15 - synthase (UDP-forming), ec:3.2.1.1 - glycogenase, ec:3.2.1.39 - endo-1,3-beta-D-glucosidase, ec:2.4.1.21 - synthase (glycosyl-transferring), ec:2.4.1.12 - synthase (UDP-forming), ec:2.7.1.4 - fructokinase (phosphorylating), ec:5.3.1.9 - isomerase, ec:2.4.1.3…
TR73457|c2_g2_i13	Amino sugar and nucleotide sugar metabolism, Galactose metabolism, Fructose and mannose metabolism, Starch and sucrose metabolism, Neomycin, kanamycin and gentamicin biosynthesis, Streptomycin biosynthesis, Glycolysis / Gluconeogenesis	map00520, map00052, map00051, map00500, map00524, map00521, map00010	46, 20, 27, 35, 2, 10, 28	ec:5.1.3.2 - 4-epimerase, ec:2.4.2.24 - synthase, ec:2.7.7.9 - uridylyltransferase, ec:2.7.1.7 - mannokinase (phosphorylating), ec:5.4.2.8 - mannose phosphomutase, ec:2.7.1.44 - galacturonokinase (phosphorylating) D-galacturonic acid kinase, ec:2.7.7.22 - guanylyltransferase (GDP), ec:5.1.3.6 - 4-epimerase, ec:3.2.1.14 - ChiC, ec:2.7.7.13 - guanylyltransferase, ec:5.1.3.12 - 5'-epimerase, ec:2.7.…
TR69402|c0_g1_i8	Pyruvate metabolism, Histidine metabolism, Chloroalkane and chloroalkene degradation, Ascorbate and aldarate metabolism, Lysine degradation, Fatty acid degradation, Tyrosine metabolism, Metabolism of xenobiotics by cytochrome P450, Arginine and proline metabolism, Limonene and pinene degradation, Tryptophan metabolism, Glycerolipid metabolism, Phenylalanine metabolism, beta-Alanine metabolism, Va…	map00620, map00340, map00625, map00053, map00310, map00071, map00350, map00980, map00330, map00903, map00380, map00561, map00360, map00410, map00280, map00982, map00010, map00981	33, 13, 5, 18, 12, 14, 26, 8, 28, 2, 29, 24, 22, 17, 21, 7, 28, 2	ec:4.1.1.32 - carboxykinase (GTP), ec:1.2.1.3 - dehydrogenase (NAD+), ec:1.1.1.79 - reductase (NADP+), ec:4.1.1.49 - carboxykinase (ATP), ec:2.3.1.12 - acetyltransferase, ec:1.1.2.3 - dehydrogenase (cytochrome), ec:1.1.1.37 - dehydrogenase, ec:1.1.1.28 - dehydrogenase, ec:3.1.2.1 - hydrolase, ec:2.7.9.1 - phosphate dikinase, ec:6.4.1.2 - carboxylase, ec:1.1.2.4 - dehydrogenase (cytochrome), ec:3.…
TR75237|c0_g3_i4	Starch and sucrose metabolism	map00500	35	ec:3.2.1.4 - endo-1,4-beta-D-glucanase, ec:3.2.1.26 - invertase, ec:3.6.1.9 - diphosphatase, ec:2.7.7.9 - uridylyltransferase, ec:2.4.1.15 - synthase (UDP-forming), ec:3.2.1.1 - glycogenase, ec:3.2.1.39 - endo-1,3-beta-D-glucosidase, ec:2.4.1.21 - synthase (glycosyl-transferring), ec:2.4.1.12 - synthase (UDP-forming), ec:2.7.1.4 - fructokinase (phosphorylating), ec:5.3.1.9 - isomerase, ec:2.4.1.3…
Mj_1_GCCAAT_L005_R1_001_(paired)_trimmed_(paired)_contig_88070	Carbon fixation in photosynthetic organisms, Pyruvate metabolism, Glyoxylate and dicarboxylate metabolism, Cysteine and methionine metabolism, Methane metabolism, Carbon fixation pathways in prokaryotes, Citrate cycle (TCA cycle)	map00710, map00620, map00630, map00270, map00680, map00720, map00020	22, 33, 34, 45, 23, 21, 18	ec:5.1.3.1 - 3-epimerase, ec:4.1.1.49 - carboxykinase (ATP), ec:2.7.2.3 - kinase, ec:1.1.1.37 - dehydrogenase, ec:5.3.1.1 - isomerase, ec:2.7.9.1 - phosphate dikinase, ec:2.6.1.1 - transaminase, ec:1.2.1.12 - dehydrogenase (phosphorylating), ec:3.1.3.11 - hexose diphosphatase, ec:5.3.1.6 - isomerase, ec:2.2.1.1 - glycolaldehydetransferase, ec:4.1.2.13 - aldolase, ec:1.1.1.82 - dehydrogenase (NADP…
TR69402|c0_g1_i7	Pyruvate metabolism, Histidine metabolism, Chloroalkane and chloroalkene degradation, Ascorbate and aldarate metabolism, Lysine degradation, Fatty acid degradation, Tyrosine metabolism, Metabolism of xenobiotics by cytochrome P450, Arginine and proline metabolism, Limonene and pinene degradation, Tryptophan metabolism, Glycerolipid metabolism, Phenylalanine metabolism, beta-Alanine metabolism, Va…	map00620, map00340, map00625, map00053, map00310, map00071, map00350, map00980, map00330, map00903, map00380, map00561, map00360, map00410, map00280, map00982, map00010, map00981	33, 13, 5, 18, 12, 14, 26, 8, 28, 2, 29, 24, 22, 17, 21, 7, 28, 2	ec:4.1.1.32 - carboxykinase (GTP), ec:1.2.1.3 - dehydrogenase (NAD+), ec:1.1.1.79 - reductase (NADP+), ec:4.1.1.49 - carboxykinase (ATP), ec:2.3.1.12 - acetyltransferase, ec:1.1.2.3 - dehydrogenase (cytochrome), ec:1.1.1.37 - dehydrogenase, ec:1.1.1.28 - dehydrogenase, ec:3.1.2.1 - hydrolase, ec:2.7.9.1 - phosphate dikinase, ec:6.4.1.2 - carboxylase, ec:1.1.2.4 - dehydrogenase (cytochrome), ec:3.…
C888083	Carbon fixation in photosynthetic organisms, Pyruvate metabolism, Glycolysis / Gluconeogenesis, Citrate cycle (TCA cycle)	map00710, map00620, map00010, map00020	22, 33, 28, 18	ec:5.1.3.1 - 3-epimerase, ec:4.1.1.49 - carboxykinase (ATP), ec:2.7.2.3 - kinase, ec:1.1.1.37 - dehydrogenase, ec:5.3.1.1 - isomerase, ec:2.7.9.1 - phosphate dikinase, ec:2.6.1.1 - transaminase, ec:1.2.1.12 - dehydrogenase (phosphorylating), ec:3.1.3.11 - hexose diphosphatase, ec:5.3.1.6 - isomerase, ec:2.2.1.1 - glycolaldehydetransferase, ec:4.1.2.13 - aldolase, ec:1.1.1.82 - dehydrogenase (NADP…
TR9435|c0_g1_i1	Carbon fixation in photosynthetic organisms, Pyruvate metabolism, Glyoxylate and dicarboxylate metabolism, Cysteine and methionine metabolism, Methane metabolism, Carbon fixation pathways in prokaryotes, Citrate cycle (TCA cycle)	map00710, map00620, map00630, map00270, map00680, map00720, map00020	22, 33, 34, 45, 23, 21, 18	ec:5.1.3.1 - 3-epimerase, ec:4.1.1.49 - carboxykinase (ATP), ec:2.7.2.3 - kinase, ec:1.1.1.37 - dehydrogenase, ec:5.3.1.1 - isomerase, ec:2.7.9.1 - phosphate dikinase, ec:2.6.1.1 - transaminase, ec:1.2.1.12 - dehydrogenase (phosphorylating), ec:3.1.3.11 - hexose diphosphatase, ec:5.3.1.6 - isomerase, ec:2.2.1.1 - glycolaldehydetransferase, ec:4.1.2.13 - aldolase, ec:1.1.1.82 - dehydrogenase (NADP…
TR69402|c0_g1_i4	Pyruvate metabolism, Histidine metabolism, Chloroalkane and chloroalkene degradation, Ascorbate and aldarate metabolism, Lysine degradation, Fatty acid degradation, Tyrosine metabolism, Metabolism of xenobiotics by cytochrome P450, Arginine and proline metabolism, Limonene and pinene degradation, Tryptophan metabolism, Glycerolipid metabolism, Phenylalanine metabolism, beta-Alanine metabolism, Va…	map00620, map00340, map00625, map00053, map00310, map00071, map00350, map00980, map00330, map00903, map00380, map00561, map00360, map00410, map00280, map00982, map00010, map00981	33, 13, 5, 18, 12, 14, 26, 8, 28, 2, 29, 24, 22, 17, 21, 7, 28, 2	ec:4.1.1.32 - carboxykinase (GTP), ec:1.2.1.3 - dehydrogenase (NAD+), ec:1.1.1.79 - reductase (NADP+), ec:4.1.1.49 - carboxykinase (ATP), ec:2.3.1.12 - acetyltransferase, ec:1.1.2.3 - dehydrogenase (cytochrome), ec:1.1.1.37 - dehydrogenase, ec:1.1.1.28 - dehydrogenase, ec:3.1.2.1 - hydrolase, ec:2.7.9.1 - phosphate dikinase, ec:6.4.1.2 - carboxylase, ec:1.1.2.4 - dehydrogenase (cytochrome), ec:3.…
TR69402|c0_g1_i3	Histidine metabolism, Phenylalanine metabolism, Tyrosine metabolism, Metabolism of xenobiotics by cytochrome P450, beta-Alanine metabolism, Drug metabolism - cytochrome P450, Glycolysis / Gluconeogenesis	map00340, map00360, map00350, map00980, map00410, map00982, map00010	13, 22, 26, 8, 17, 7, 28	ec:1.2.1.3 - dehydrogenase (NAD+), ec:2.1.1.8 - N-methyltransferase, ec:4.2.1.19 - dehydratase, ec:3.5.4.19 - cyclohydrolase, ec:5.3.1.16 - isomerase, ec:2.6.1.9 - transaminase, ec:3.1.3.15 - histidinol phosphate phosphatase, ec:1.2.1.5 - dehydrogenase [NAD(P)+], ec:3.6.1.31 - diphosphatase, ec:2.4.2.17 - phosphoribosyltransferase, ec:1.1.1.23 - dehydrogenase, ec:4.1.1.22 - decarboxylase, ec:1.4.…
TR69402|c0_g1_i5	Pyruvate metabolism, Histidine metabolism, Chloroalkane and chloroalkene degradation, Ascorbate and aldarate metabolism, Lysine degradation, Fatty acid degradation, Tyrosine metabolism, Metabolism of xenobiotics by cytochrome P450, Arginine and proline metabolism, Limonene and pinene degradation, Tryptophan metabolism, Glycerolipid metabolism, Phenylalanine metabolism, beta-Alanine metabolism, Va…	map00620, map00340, map00625, map00053, map00310, map00071, map00350, map00980, map00330, map00903, map00380, map00561, map00360, map00410, map00280, map00982, map00010, map00981	33, 13, 5, 18, 12, 14, 26, 8, 28, 2, 29, 24, 22, 17, 21, 7, 28, 2	ec:4.1.1.32 - carboxykinase (GTP), ec:1.2.1.3 - dehydrogenase (NAD+), ec:1.1.1.79 - reductase (NADP+), ec:4.1.1.49 - carboxykinase (ATP), ec:2.3.1.12 - acetyltransferase, ec:1.1.2.3 - dehydrogenase (cytochrome), ec:1.1.1.37 - dehydrogenase, ec:1.1.1.28 - dehydrogenase, ec:3.1.2.1 - hydrolase, ec:2.7.9.1 - phosphate dikinase, ec:6.4.1.2 - carboxylase, ec:1.1.2.4 - dehydrogenase (cytochrome), ec:3.…
TR73457|c2_g2_i14	Amino sugar and nucleotide sugar metabolism, Galactose metabolism, Fructose and mannose metabolism, Starch and sucrose metabolism, Neomycin, kanamycin and gentamicin biosynthesis, Streptomycin biosynthesis, Glycolysis / Gluconeogenesis	map00520, map00052, map00051, map00500, map00524, map00521, map00010	46, 20, 27, 35, 2, 10, 28	ec:5.1.3.2 - 4-epimerase, ec:2.4.2.24 - synthase, ec:2.7.7.9 - uridylyltransferase, ec:2.7.1.7 - mannokinase (phosphorylating), ec:5.4.2.8 - mannose phosphomutase, ec:2.7.1.44 - galacturonokinase (phosphorylating) D-galacturonic acid kinase, ec:2.7.7.22 - guanylyltransferase (GDP), ec:5.1.3.6 - 4-epimerase, ec:3.2.1.14 - ChiC, ec:2.7.7.13 - guanylyltransferase, ec:5.1.3.12 - 5'-epimerase, ec:2.7.…
Mj_1_GCCAAT_L005_R1_001_(paired)_trimmed_(paired)_contig_90381	Valine, leucine and isoleucine biosynthesis, C5-Branched dibasic acid metabolism, Butanoate metabolism, Pantothenate and CoA biosynthesis	map00290, map00660, map00650, map00770	9, 5, 19, 19	ec:1.1.1.85 - dehydrogenase, ec:4.2.1.33 - dehydratase, ec:4.2.1.9 - dehydratase, ec:4.3.1.19 - ammonia-lyase, ec:2.6.1.42 - transaminase, ec:1.1.1.86 - reductoisomerase (NADP+), ec:2.6.1.6 - transaminase, ec:2.3.3.13 - synthase, ec:2.2.1.6 - synthase, ec:1.1.1.85 - dehydrogenase, ec:2.2.1.6 - synthase, ec:4.1.3.17 - aldolase, ec:4.1.3.22 - lyase, ec:6.2.1.5 - ligase (ADP-forming), ec:4.1.1.15 - …
TR34245|c0_g1_i1	Porphyrin and chlorophyll metabolism	map00860	31	ec:2.3.1.37 - synthase, ec:3.1.1.14 - CLH, ec:1.3.7.4 - oxidoreductase, ec:4.99.1.4 - ferrochelatase, ec:4.2.1.75 - synthase, ec:3.2.1.31 - beta-glucuronide glucuronohydrolase glucuronidase, ec:4.1.1.37 - decarboxylase, ec:1.3.1.75 - protochlorophyllide a 8-vinyl-reductase (NADPH), ec:4.2.1.24 - synthase, ec:5.4.3.8 - 2,1-aminomutase, ec:1.3.1.33 - reductase, ec:2.1.1.107 - C-methyltransferase, e…
TR72060|c0_g2_i12	Alanine, aspartate and glutamate metabolism, Cyanoamino acid metabolism	map00250, map00460	29, 13	ec:1.4.1.14 - synthase (NADH), ec:4.1.1.15 - decarboxylase, ec:6.3.4.5 - synthase, ec:1.4.1.2 - dehydrogenase, ec:1.2.1.24 - dehydrogenase (NAD+), ec:6.3.1.2 - synthetase, ec:3.5.1.3 - alpha-keto acid-omega-amidase, ec:1.2.1.16 - dehydrogenase [NAD(P)+], ec:6.3.4.16 - synthase (ammonia), ec:6.3.5.5 - synthase (glutamine-hydrolysing), ec:2.6.1.1 - transaminase, ec:4.3.2.1 - lyase, ec:1.4.3.2 - oxi…
TR70803|c0_g1_i3	Phosphatidylinositol signaling system	map04070	20	ec:2.7.1.127 - 3-kinase, ec:2.7.1.158 - 2-kinase, ec:3.1.3.56 - 5-phosphatase, ec:2.7.1.107 - kinase (ATP), ec:2.7.1.137 - 3-kinase, ec:2.7.1.151 - multikinase, ec:3.1.4.11 - phospholipase C, ec:2.7.1.159 - 5/6-kinase, ec:3.1.3.36 - 5-phosphatase, ec:2.7.11.13 - kinase C, ec:3.1.3.57 - 1-phosphatase, ec:2.7.1.67 - 4-kinase, ec:2.7.8.11 - 3-phosphatidyltransferase, ec:2.7.7.41 - cytidylyltransfera…
TR70803|c0_g1_i4	Phosphatidylinositol signaling system	map04070	20	ec:2.7.1.127 - 3-kinase, ec:2.7.1.158 - 2-kinase, ec:3.1.3.56 - 5-phosphatase, ec:2.7.1.107 - kinase (ATP), ec:2.7.1.137 - 3-kinase, ec:2.7.1.151 - multikinase, ec:3.1.4.11 - phospholipase C, ec:2.7.1.159 - 5/6-kinase, ec:3.1.3.36 - 5-phosphatase, ec:2.7.11.13 - kinase C, ec:3.1.3.57 - 1-phosphatase, ec:2.7.1.67 - 4-kinase, ec:2.7.8.11 - 3-phosphatidyltransferase, ec:2.7.7.41 - cytidylyltransfera…
TR70803|c0_g1_i5	Phosphatidylinositol signaling system	map04070	20	ec:2.7.1.127 - 3-kinase, ec:2.7.1.158 - 2-kinase, ec:3.1.3.56 - 5-phosphatase, ec:2.7.1.107 - kinase (ATP), ec:2.7.1.137 - 3-kinase, ec:2.7.1.151 - multikinase, ec:3.1.4.11 - phospholipase C, ec:2.7.1.159 - 5/6-kinase, ec:3.1.3.36 - 5-phosphatase, ec:2.7.11.13 - kinase C, ec:3.1.3.57 - 1-phosphatase, ec:2.7.1.67 - 4-kinase, ec:2.7.8.11 - 3-phosphatidyltransferase, ec:2.7.7.41 - cytidylyltransfera…
TR72060|c0_g2_i13	Alanine, aspartate and glutamate metabolism, Cyanoamino acid metabolism	map00250, map00460	29, 13	ec:1.4.1.14 - synthase (NADH), ec:4.1.1.15 - decarboxylase, ec:6.3.4.5 - synthase, ec:1.4.1.2 - dehydrogenase, ec:1.2.1.24 - dehydrogenase (NAD+), ec:6.3.1.2 - synthetase, ec:3.5.1.3 - alpha-keto acid-omega-amidase, ec:1.2.1.16 - dehydrogenase [NAD(P)+], ec:6.3.4.16 - synthase (ammonia), ec:6.3.5.5 - synthase (glutamine-hydrolysing), ec:2.6.1.1 - transaminase, ec:4.3.2.1 - lyase, ec:1.4.3.2 - oxi…
TR70803|c0_g1_i6	Phosphatidylinositol signaling system	map04070	20	ec:2.7.1.127 - 3-kinase, ec:2.7.1.158 - 2-kinase, ec:3.1.3.56 - 5-phosphatase, ec:2.7.1.107 - kinase (ATP), ec:2.7.1.137 - 3-kinase, ec:2.7.1.151 - multikinase, ec:3.1.4.11 - phospholipase C, ec:2.7.1.159 - 5/6-kinase, ec:3.1.3.36 - 5-phosphatase, ec:2.7.11.13 - kinase C, ec:3.1.3.57 - 1-phosphatase, ec:2.7.1.67 - 4-kinase, ec:2.7.8.11 - 3-phosphatidyltransferase, ec:2.7.7.41 - cytidylyltransfera…
TR70803|c0_g1_i7	Phosphatidylinositol signaling system	map04070	20	ec:2.7.1.127 - 3-kinase, ec:2.7.1.158 - 2-kinase, ec:3.1.3.56 - 5-phosphatase, ec:2.7.1.107 - kinase (ATP), ec:2.7.1.137 - 3-kinase, ec:2.7.1.151 - multikinase, ec:3.1.4.11 - phospholipase C, ec:2.7.1.159 - 5/6-kinase, ec:3.1.3.36 - 5-phosphatase, ec:2.7.11.13 - kinase C, ec:3.1.3.57 - 1-phosphatase, ec:2.7.1.67 - 4-kinase, ec:2.7.8.11 - 3-phosphatidyltransferase, ec:2.7.7.41 - cytidylyltransfera…
TR61115|c0_g1_i1	Pyruvate metabolism	map00620	33	ec:4.1.1.32 - carboxykinase (GTP), ec:1.2.1.3 - dehydrogenase (NAD+), ec:1.1.1.79 - reductase (NADP+), ec:4.1.1.49 - carboxykinase (ATP), ec:2.3.1.12 - acetyltransferase, ec:1.1.2.3 - dehydrogenase (cytochrome), ec:1.1.1.37 - dehydrogenase, ec:1.1.1.28 - dehydrogenase, ec:3.1.2.1 - hydrolase, ec:2.7.9.1 - phosphate dikinase, ec:6.4.1.2 - carboxylase, ec:1.1.2.4 - dehydrogenase (cytochrome), ec:3.…
TR61115|c0_g1_i2	Pyruvate metabolism	map00620	33	ec:4.1.1.32 - carboxykinase (GTP), ec:1.2.1.3 - dehydrogenase (NAD+), ec:1.1.1.79 - reductase (NADP+), ec:4.1.1.49 - carboxykinase (ATP), ec:2.3.1.12 - acetyltransferase, ec:1.1.2.3 - dehydrogenase (cytochrome), ec:1.1.1.37 - dehydrogenase, ec:1.1.1.28 - dehydrogenase, ec:3.1.2.1 - hydrolase, ec:2.7.9.1 - phosphate dikinase, ec:6.4.1.2 - carboxylase, ec:1.1.2.4 - dehydrogenase (cytochrome), ec:3.…
TR67372|c0_g1_i1	Starch and sucrose metabolism	map00500	35	ec:3.2.1.4 - endo-1,4-beta-D-glucanase, ec:3.2.1.26 - invertase, ec:3.6.1.9 - diphosphatase, ec:2.7.7.9 - uridylyltransferase, ec:2.4.1.15 - synthase (UDP-forming), ec:3.2.1.1 - glycogenase, ec:3.2.1.39 - endo-1,3-beta-D-glucosidase, ec:2.4.1.21 - synthase (glycosyl-transferring), ec:2.4.1.12 - synthase (UDP-forming), ec:2.7.1.4 - fructokinase (phosphorylating), ec:5.3.1.9 - isomerase, ec:2.4.1.3…
Mj_1_GCCAAT_L005_R1_001_(paired)_trimmed_(paired)_contig_6797	Lipopolysaccharide biosynthesis	map00540	6	ec:2.3.1.129 - O-acyltransferase, ec:2.7.7.38 - cytidylyltransferase, ec:2.5.1.55 - synthase, ec:2.7.1.130 - 4'-kinase, ec:5.3.1.13 - isomerase, ec:2.4.1.182 - synthase
Mj_1_GCCAAT_L005_R1_001_(paired)_trimmed_(paired)_contig_4134	Thiamine metabolism, Riboflavin metabolism	map00730, map00740	12, 12	ec:3.6.1.15 - phosphatase, ec:2.7.4.7 - kinase, ec:2.8.1.7 - desulfurase, ec:2.7.6.2 - diphosphokinase, ec:2.7.1.50 - kinase, ec:2.7.4.3 - kinase, ec:2.7.1.49 - kinase, ec:3.5.99.2 - aminohydrolase, ec:2.5.1.3 - phosphate synthase, ec:3.1.3.2 - phosphatase, ec:4.1.99.19 - synthase, ec:2.2.1.7 - synthase, ec:3.6.1.9 - diphosphatase, ec:3.5.4.25 - cyclohydrolase II, ec:2.7.7.2 - synthase, ec:1.5.1.…
TR93561|c0_g1_i1	Aminoacyl-tRNA biosynthesis	map00970	23	ec:6.1.1.22 - ligase, ec:6.1.1.3 - ligase, ec:6.1.1.10 - ligase, ec:6.1.1.18 - ligase, ec:6.1.1.7 - ligase, ec:6.1.1.23 - ligase, ec:6.1.1.14 - ligase, ec:6.1.1.4 - ligase, ec:6.1.1.20 - ligase, ec:6.1.1.11 - ligase, ec:6.1.1.1 - ligase, ec:6.1.1.19 - ligase, ec:2.1.2.9 - formyltransferase, ec:6.1.1.9 - ligase, ec:6.1.1.15 - ligase, ec:6.1.1.5 - ligase, ec:6.1.1.21 - ligase, ec:6.1.1.12 - ligase,…
TR9704|c0_g1_i1	Purine metabolism	map00230	60	ec:3.6.1.15 - phosphatase, ec:4.6.1.2 - cyclase, ec:3.2.2.7 - nucleosidase, ec:3.6.1.9 - diphosphatase, ec:1.17.4.1 - reductase, ec:2.7.4.10 - kinase, ec:6.3.3.1 - cyclo-ligase, ec:1.7.3.3 - urate hydroxylase, ec:3.1.3.5 - uridine 5'-nucleotidase, ec:2.7.1.74 - kinase, ec:6.3.2.6 - synthase, ec:3.5.3.9 - deiminase, ec:3.2.2.1 - nucleosidase, ec:1.17.3.2 - oxidase, ec:2.7.4.3 - kinase, ec:3.5.2.17…
Mj_1_GCCAAT_L005_R1_001_(paired)_trimmed_(paired)_contig_4139	N-Glycan biosynthesis, Various types of N-glycan biosynthesis	map00510, map00513	18, 15	ec:2.4.1.101 - 2-beta-N-acetylglucosaminyltransferase, ec:2.4.1.117 - beta-glucosyltransferase, ec:2.4.1.259 - alpha-1,2-mannosyltransferase, ec:2.4.1.131 - alpha-1,2-mannosyltransferase, ec:2.4.1.144 - 4-beta-N-acetylglucosaminyltransferase, ec:2.4.1.261 - alpha-1,2-mannosyltransferase, ec:3.2.1.106 - glucosidase, ec:2.4.1.132 - alpha-1,3-mannosyltransferase, ec:3.6.1.43 - dolichol diphosphatase…
Mj_1_GCCAAT_L005_R1_001_(paired)_trimmed_(paired)_contig_4133	Glutathione metabolism, Phenylpropanoid biosynthesis	map00480, map00940	19, 17	ec:1.11.1.11 - peroxidase, ec:1.17.4.1 - reductase, ec:3.5.2.9 - (ATP-hydrolysing), ec:1.8.5.1 - dehydrogenase (ascorbate), ec:1.11.1.15 - to 1.11.1.24 and 1.11.1.25 and 1.11.1.26 and 1.11.1.27 and 1.11.1.28 and 1.11.1.29, ec:1.1.1.42 - dehydrogenase (NADP+), ec:1.11.1.12 - glutathione peroxidase, ec:2.5.1.16 - synthase, ec:6.3.2.2 - ligase, ec:1.8.1.7 - reductase, ec:3.4.19.13 - gamma-glutamate …
TR58660|c1_g1_i2	Pentose and glucuronate interconversions	map00040	20	ec:2.7.1.17 - xylulokinase (phosphorylating), ec:5.1.3.1 - 3-epimerase, ec:5.3.1.5 - isomerase, ec:2.7.7.9 - uridylyltransferase, ec:1.1.1.21 - reductase, ec:3.2.1.31 - beta-glucuronide glucuronohydrolase glucuronidase, ec:1.1.1.12 - 4-dehydrogenase, ec:2.7.7.44 - uridylyltransferase, ec:1.1.1.22 - 6-dehydrogenase, ec:1.1.1.9 - reductase, ec:3.1.1.11 - pectin demethoxylase, ec:3.2.1.15 - pectin d…
TR76494|c0_g4_i2	Pentose and glucuronate interconversions	map00040	20	ec:2.7.1.17 - xylulokinase (phosphorylating), ec:5.1.3.1 - 3-epimerase, ec:5.3.1.5 - isomerase, ec:2.7.7.9 - uridylyltransferase, ec:1.1.1.21 - reductase, ec:3.2.1.31 - beta-glucuronide glucuronohydrolase glucuronidase, ec:1.1.1.12 - 4-dehydrogenase, ec:2.7.7.44 - uridylyltransferase, ec:1.1.1.22 - 6-dehydrogenase, ec:1.1.1.9 - reductase, ec:3.1.1.11 - pectin demethoxylase, ec:3.2.1.15 - pectin d…
TR76494|c0_g4_i4	Pentose and glucuronate interconversions	map00040	20	ec:2.7.1.17 - xylulokinase (phosphorylating), ec:5.1.3.1 - 3-epimerase, ec:5.3.1.5 - isomerase, ec:2.7.7.9 - uridylyltransferase, ec:1.1.1.21 - reductase, ec:3.2.1.31 - beta-glucuronide glucuronohydrolase glucuronidase, ec:1.1.1.12 - 4-dehydrogenase, ec:2.7.7.44 - uridylyltransferase, ec:1.1.1.22 - 6-dehydrogenase, ec:1.1.1.9 - reductase, ec:3.1.1.11 - pectin demethoxylase, ec:3.2.1.15 - pectin d…
TR76494|c0_g4_i6	Pentose and glucuronate interconversions	map00040	20	ec:2.7.1.17 - xylulokinase (phosphorylating), ec:5.1.3.1 - 3-epimerase, ec:5.3.1.5 - isomerase, ec:2.7.7.9 - uridylyltransferase, ec:1.1.1.21 - reductase, ec:3.2.1.31 - beta-glucuronide glucuronohydrolase glucuronidase, ec:1.1.1.12 - 4-dehydrogenase, ec:2.7.7.44 - uridylyltransferase, ec:1.1.1.22 - 6-dehydrogenase, ec:1.1.1.9 - reductase, ec:3.1.1.11 - pectin demethoxylase, ec:3.2.1.15 - pectin d…
TR76494|c0_g4_i5	Pentose and glucuronate interconversions	map00040	20	ec:2.7.1.17 - xylulokinase (phosphorylating), ec:5.1.3.1 - 3-epimerase, ec:5.3.1.5 - isomerase, ec:2.7.7.9 - uridylyltransferase, ec:1.1.1.21 - reductase, ec:3.2.1.31 - beta-glucuronide glucuronohydrolase glucuronidase, ec:1.1.1.12 - 4-dehydrogenase, ec:2.7.7.44 - uridylyltransferase, ec:1.1.1.22 - 6-dehydrogenase, ec:1.1.1.9 - reductase, ec:3.1.1.11 - pectin demethoxylase, ec:3.2.1.15 - pectin d…
TR51557|c0_g1_i1	Pentose phosphate pathway, Amino sugar and nucleotide sugar metabolism, Starch and sucrose metabolism, Glycolysis / Gluconeogenesis	map00030, map00520, map00500, map00010	21, 46, 35, 28	ec:5.1.3.1 - 3-epimerase, ec:2.7.1.11 - phosphohexokinase, ec:5.3.1.9 - isomerase, ec:3.1.3.11 - hexose diphosphatase, ec:1.1.1.47 - 1-dehydrogenase [NAD(P)+], ec:5.3.1.6 - isomerase, ec:2.7.1.15 - deoxyribokinase, ec:2.2.1.1 - glycolaldehydetransferase, ec:4.1.2.13 - aldolase, ec:2.7.1.12 - gluconokinase (phosphorylating), ec:2.7.1.90 - 1-phosphotransferase, ec:5.4.2.2 - (alpha-D-glucose-1,6-bis…
TR65848|c0_g1_i2	Terpenoid backbone biosynthesis	map00900	27	ec:2.7.4.2 - kinase, ec:2.5.1.84 - diphosphate synthase [geranyl-diphosphate specific], ec:4.2.3.27 - synthase, ec:1.8.3.5 - oxidase, ec:2.5.1.58 - farnesyltransferase, ec:2.7.1.36 - kinase, ec:1.1.1.34 - reductase (NADPH), ec:2.1.1.100 - O-methyltransferase, ec:4.1.1.33 - decarboxylase, ec:2.5.1.30 - diphosphate synthase, ec:2.5.1.85 - diphosphate synthase [geranylgeranyl-diphosphate specific], …
TR65848|c0_g1_i1	Terpenoid backbone biosynthesis	map00900	27	ec:2.7.4.2 - kinase, ec:2.5.1.84 - diphosphate synthase [geranyl-diphosphate specific], ec:4.2.3.27 - synthase, ec:1.8.3.5 - oxidase, ec:2.5.1.58 - farnesyltransferase, ec:2.7.1.36 - kinase, ec:1.1.1.34 - reductase (NADPH), ec:2.1.1.100 - O-methyltransferase, ec:4.1.1.33 - decarboxylase, ec:2.5.1.30 - diphosphate synthase, ec:2.5.1.85 - diphosphate synthase [geranylgeranyl-diphosphate specific], …
TR66619|c0_g1_i8	Flavonoid biosynthesis, Phenylpropanoid biosynthesis	map00941, map00940	10, 17	ec:1.1.1.234 - 4-reductase, ec:1.17.1.3 - reductase, ec:2.3.1.170 - synthase, ec:2.1.1.104 - O-methyltransferase, ec:2.3.1.74 - synthase, ec:5.5.1.6 - isomerase, ec:1.3.1.77 - reductase [(2R,3R)-flavan-3-ol-forming], ec:1.1.1.219 - 4-reductase, ec:2.3.1.133 - O-hydroxycinnamoyltransferase, ec:1.14.11.9 - 3-dioxygenase, ec:3.2.1.126 - beta-glucosidase, ec:1.1.1.195 - dehydrogenase, ec:1.11.1.7 - l…
TR66619|c0_g1_i9	Flavonoid biosynthesis, Phenylpropanoid biosynthesis	map00941, map00940	10, 17	ec:1.1.1.234 - 4-reductase, ec:1.17.1.3 - reductase, ec:2.3.1.170 - synthase, ec:2.1.1.104 - O-methyltransferase, ec:2.3.1.74 - synthase, ec:5.5.1.6 - isomerase, ec:1.3.1.77 - reductase [(2R,3R)-flavan-3-ol-forming], ec:1.1.1.219 - 4-reductase, ec:2.3.1.133 - O-hydroxycinnamoyltransferase, ec:1.14.11.9 - 3-dioxygenase, ec:3.2.1.126 - beta-glucosidase, ec:1.1.1.195 - dehydrogenase, ec:1.11.1.7 - l…
TR126324|c0_g1_i1	Fructose and mannose metabolism	map00051	27	ec:5.3.1.5 - isomerase, ec:1.1.1.21 - reductase, ec:2.7.1.7 - mannokinase (phosphorylating), ec:5.4.2.8 - mannose phosphomutase, ec:2.7.7.22 - guanylyltransferase (GDP), ec:1.1.1.67 - 2-dehydrogenase, ec:3.2.1.78 - endo-1,4-beta-mannosidase, ec:1.1.1.122 - 1-dehydrogenase, ec:5.3.1.1 - isomerase, ec:2.7.7.13 - guanylyltransferase, ec:2.7.1.11 - phosphohexokinase, ec:2.7.1.4 - fructokinase (phosph…
TR66619|c0_g1_i6	Flavonoid biosynthesis, Phenylpropanoid biosynthesis	map00941, map00940	10, 17	ec:1.1.1.234 - 4-reductase, ec:1.17.1.3 - reductase, ec:2.3.1.170 - synthase, ec:2.1.1.104 - O-methyltransferase, ec:2.3.1.74 - synthase, ec:5.5.1.6 - isomerase, ec:1.3.1.77 - reductase [(2R,3R)-flavan-3-ol-forming], ec:1.1.1.219 - 4-reductase, ec:2.3.1.133 - O-hydroxycinnamoyltransferase, ec:1.14.11.9 - 3-dioxygenase, ec:3.2.1.126 - beta-glucosidase, ec:1.1.1.195 - dehydrogenase, ec:1.11.1.7 - l…
TR66619|c0_g1_i7	Flavonoid biosynthesis, Phenylpropanoid biosynthesis	map00941, map00940	10, 17	ec:1.1.1.234 - 4-reductase, ec:1.17.1.3 - reductase, ec:2.3.1.170 - synthase, ec:2.1.1.104 - O-methyltransferase, ec:2.3.1.74 - synthase, ec:5.5.1.6 - isomerase, ec:1.3.1.77 - reductase [(2R,3R)-flavan-3-ol-forming], ec:1.1.1.219 - 4-reductase, ec:2.3.1.133 - O-hydroxycinnamoyltransferase, ec:1.14.11.9 - 3-dioxygenase, ec:3.2.1.126 - beta-glucosidase, ec:1.1.1.195 - dehydrogenase, ec:1.11.1.7 - l…
TR73103|c0_g1_i2	Drug metabolism - other enzymes, Pyrimidine metabolism	map00983, map00240	19, 31	ec:2.7.1.48 - kinase, ec:3.5.2.2 - hydantoinase, ec:3.1.1.1 - ali-esterase, ec:1.17.4.1 - reductase, ec:1.3.1.2 - dehydrogenase (NADP+), ec:3.5.1.6 - N-carbamoyl-beta-alanine amidohydrolase, ec:3.2.1.31 - beta-glucuronide glucuronohydrolase glucuronidase, ec:3.5.4.5 - deaminase, ec:1.17.3.2 - oxidase, ec:2.7.4.14 - kinase, ec:1.1.1.205 - dehydrogenase, ec:2.4.2.10 - phosphoribosyltransferase, ec:…
TR9564|c0_g1_i1	Starch and sucrose metabolism	map00500	35	ec:3.2.1.4 - endo-1,4-beta-D-glucanase, ec:3.2.1.26 - invertase, ec:3.6.1.9 - diphosphatase, ec:2.7.7.9 - uridylyltransferase, ec:2.4.1.15 - synthase (UDP-forming), ec:3.2.1.1 - glycogenase, ec:3.2.1.39 - endo-1,3-beta-D-glucosidase, ec:2.4.1.21 - synthase (glycosyl-transferring), ec:2.4.1.12 - synthase (UDP-forming), ec:2.7.1.4 - fructokinase (phosphorylating), ec:5.3.1.9 - isomerase, ec:2.4.1.3…
TR66619|c0_g1_i2	Flavonoid biosynthesis, Phenylpropanoid biosynthesis	map00941, map00940	10, 17	ec:1.1.1.234 - 4-reductase, ec:1.17.1.3 - reductase, ec:2.3.1.170 - synthase, ec:2.1.1.104 - O-methyltransferase, ec:2.3.1.74 - synthase, ec:5.5.1.6 - isomerase, ec:1.3.1.77 - reductase [(2R,3R)-flavan-3-ol-forming], ec:1.1.1.219 - 4-reductase, ec:2.3.1.133 - O-hydroxycinnamoyltransferase, ec:1.14.11.9 - 3-dioxygenase, ec:3.2.1.126 - beta-glucosidase, ec:1.1.1.195 - dehydrogenase, ec:1.11.1.7 - l…
TR80221|c0_g1_i1	Methane metabolism, Glycolysis / Gluconeogenesis	map00680, map00010	23, 28	ec:2.2.1.3 - transketolase, ec:4.4.1.22 - synthase, ec:4.2.1.11 - hydratase, ec:1.1.1.37 - dehydrogenase, ec:2.1.2.1 - hydroxymethyltransferase, ec:2.7.1.11 - phosphohexokinase, ec:2.6.1.45 - transaminase, ec:1.2.1.46 - dehydrogenase, ec:4.1.1.25 - decarboxylase, ec:3.1.3.11 - hexose diphosphatase, ec:1.1.3.13 - oxidase, ec:4.1.2.13 - aldolase, ec:1.1.1.29 - dehydrogenase, ec:6.2.1.1 - ligase, ec…
TR57454|c0_g1_i11	Vitamin B6 metabolism	map00750	8	ec:1.4.3.5 - 5'-phosphate synthase, ec:4.2.3.1 - synthase, ec:1.1.1.65 - 4-dehydrogenase, ec:1.2.3.1 - oxidase, ec:1.1.1.107 - 4-dehydrogenase, ec:2.7.1.35 - kinase, ec:4.3.3.6 - 5'-phosphate synthase (glutamine hydrolysing), ec:2.6.1.52 - transaminase
TR60668|c0_g1_i1	Glyoxylate and dicarboxylate metabolism	map00630	34	ec:3.5.1.9 - kynurenine formamidase, ec:4.1.3.1 - lyase, ec:1.1.1.79 - reductase (NADP+), ec:2.7.1.31 - 3-kinase, ec:3.5.1.49 - ec:3.5.1.49 formamidase, ec:4.1.1.2 - decarboxylase, ec:1.1.1.60 - reductase, ec:3.1.3.18 - phosphatase, ec:1.1.1.37 - dehydrogenase, ec:1.1.99.14 - dehydrogenase, ec:2.1.2.1 - hydroxymethyltransferase, ec:1.1.1.81 - reductase, ec:6.3.1.2 - synthetase, ec:2.6.1.45 - tran…
Mj_1_GCCAAT_L005_R1_001_(paired)_trimmed_(paired)_contig_5489	Glycosaminoglycan degradation, Other glycan degradation, Galactose metabolism, Sphingolipid metabolism, Glycosphingolipid biosynthesis - ganglio series	map00531, map00511, map00052, map00600, map00604	4, 8, 20, 14, 4	ec:3.2.1.31 - beta-glucuronide glucuronohydrolase glucuronidase, ec:3.2.1.23 - lactase (ambiguous), ec:3.2.1.50 - alpha-acetylglucosaminidase, ec:3.2.1.52 - hexosaminidase, ec:3.2.1.23 - lactase (ambiguous), ec:3.5.1.26 - aspartylglucosylamine deaspartylase, ec:3.2.1.96 - endo-beta-N-acetylglucosaminidase, ec:3.2.1.24 - alpha-D-mannosidase, ec:3.2.1.45 - psychosine hydrolase, ec:3.2.1.51 - alpha-…
Mj_1_GCCAAT_L005_R1_001_(paired)_trimmed_(paired)_contig_5488	Ubiquinone and other terpenoid-quinone biosynthesis, Phenylpropanoid biosynthesis	map00130, map00940	14, 17	ec:2.5.1.39 - polyprenyltransferase, ec:1.1.1.237 - reductase, ec:1.6.5.2 - dehydrogenase (quinone), ec:2.1.1.64 - 3-O-methyltransferase, ec:2.1.1.95 - C-methyltransferase, ec:4.1.3.36 - synthase, ec:1.13.11.27 - dioxygenase, ec:2.6.1.5 - transaminase, ec:4.2.99.20 - synthase, ec:6.2.1.26 - ligase, ec:2.2.1.9 - synthase, ec:2.1.1.114 - methyltransferase, ec:5.4.4.2 - synthase, ec:6.2.1.12 - ligas…
scaffold11195	Carbon fixation in photosynthetic organisms, Biosynthesis of ansamycins, Pyruvate metabolism, Pentose phosphate pathway, Glycolysis / Gluconeogenesis, Citrate cycle (TCA cycle)	map00710, map01051, map00620, map00030, map00010, map00020	22, 1, 33, 21, 28, 18	ec:5.1.3.1 - 3-epimerase, ec:4.1.1.49 - carboxykinase (ATP), ec:2.7.2.3 - kinase, ec:1.1.1.37 - dehydrogenase, ec:5.3.1.1 - isomerase, ec:2.7.9.1 - phosphate dikinase, ec:2.6.1.1 - transaminase, ec:1.2.1.12 - dehydrogenase (phosphorylating), ec:3.1.3.11 - hexose diphosphatase, ec:5.3.1.6 - isomerase, ec:2.2.1.1 - glycolaldehydetransferase, ec:4.1.2.13 - aldolase, ec:1.1.1.82 - dehydrogenase (NADP…
TR73103|c0_g1_i8	Drug metabolism - other enzymes, Pyrimidine metabolism	map00983, map00240	19, 31	ec:2.7.1.48 - kinase, ec:3.5.2.2 - hydantoinase, ec:3.1.1.1 - ali-esterase, ec:1.17.4.1 - reductase, ec:1.3.1.2 - dehydrogenase (NADP+), ec:3.5.1.6 - N-carbamoyl-beta-alanine amidohydrolase, ec:3.2.1.31 - beta-glucuronide glucuronohydrolase glucuronidase, ec:3.5.4.5 - deaminase, ec:1.17.3.2 - oxidase, ec:2.7.4.14 - kinase, ec:1.1.1.205 - dehydrogenase, ec:2.4.2.10 - phosphoribosyltransferase, ec:…
Mj_1_GCCAAT_L005_R1_001_(paired)_trimmed_(paired)_contig_4154	Alanine, aspartate and glutamate metabolism, Histidine metabolism, Isoquinoline alkaloid biosynthesis, Tyrosine metabolism, Cysteine and methionine metabolism, Lysine biosynthesis, Arginine and proline metabolism, Phenylalanine, tyrosine and tryptophan biosynthesis, Carbon fixation in photosynthetic organisms, Arginine biosynthesis, Phenylalanine metabolism, Tropane, piperidine and pyridine alkal…	map00250, map00340, map00950, map00350, map00270, map00300, map00330, map00400, map00710, map00220, map00360, map00960, map00130, map00401	29, 13, 17, 26, 45, 12, 28, 27, 22, 21, 22, 11, 14, 5	ec:1.4.1.14 - synthase (NADH), ec:4.1.1.15 - decarboxylase, ec:6.3.4.5 - synthase, ec:1.4.1.2 - dehydrogenase, ec:1.2.1.24 - dehydrogenase (NAD+), ec:6.3.1.2 - synthetase, ec:3.5.1.3 - alpha-keto acid-omega-amidase, ec:1.2.1.16 - dehydrogenase [NAD(P)+], ec:6.3.4.16 - synthase (ammonia), ec:6.3.5.5 - synthase (glutamine-hydrolysing), ec:2.6.1.1 - transaminase, ec:4.3.2.1 - lyase, ec:1.4.3.2 - oxi…
TR73103|c0_g1_i5	Drug metabolism - other enzymes, Pyrimidine metabolism	map00983, map00240	19, 31	ec:2.7.1.48 - kinase, ec:3.5.2.2 - hydantoinase, ec:3.1.1.1 - ali-esterase, ec:1.17.4.1 - reductase, ec:1.3.1.2 - dehydrogenase (NADP+), ec:3.5.1.6 - N-carbamoyl-beta-alanine amidohydrolase, ec:3.2.1.31 - beta-glucuronide glucuronohydrolase glucuronidase, ec:3.5.4.5 - deaminase, ec:1.17.3.2 - oxidase, ec:2.7.4.14 - kinase, ec:1.1.1.205 - dehydrogenase, ec:2.4.2.10 - phosphoribosyltransferase, ec:…
scaffold11191	Fructose and mannose metabolism	map00051	27	ec:5.3.1.5 - isomerase, ec:1.1.1.21 - reductase, ec:2.7.1.7 - mannokinase (phosphorylating), ec:5.4.2.8 - mannose phosphomutase, ec:2.7.7.22 - guanylyltransferase (GDP), ec:1.1.1.67 - 2-dehydrogenase, ec:3.2.1.78 - endo-1,4-beta-mannosidase, ec:1.1.1.122 - 1-dehydrogenase, ec:5.3.1.1 - isomerase, ec:2.7.7.13 - guanylyltransferase, ec:2.7.1.11 - phosphohexokinase, ec:2.7.1.4 - fructokinase (phosph…
TR73103|c0_g1_i4	Drug metabolism - other enzymes, Pyrimidine metabolism	map00983, map00240	19, 31	ec:2.7.1.48 - kinase, ec:3.5.2.2 - hydantoinase, ec:3.1.1.1 - ali-esterase, ec:1.17.4.1 - reductase, ec:1.3.1.2 - dehydrogenase (NADP+), ec:3.5.1.6 - N-carbamoyl-beta-alanine amidohydrolase, ec:3.2.1.31 - beta-glucuronide glucuronohydrolase glucuronidase, ec:3.5.4.5 - deaminase, ec:1.17.3.2 - oxidase, ec:2.7.4.14 - kinase, ec:1.1.1.205 - dehydrogenase, ec:2.4.2.10 - phosphoribosyltransferase, ec:…
Mj_1_GCCAAT_L005_R1_001_(paired)_trimmed_(paired)_contig_4155	Drug metabolism - other enzymes	map00983	19	ec:2.7.1.48 - kinase, ec:3.5.2.2 - hydantoinase, ec:3.1.1.1 - ali-esterase, ec:1.17.4.1 - reductase, ec:1.3.1.2 - dehydrogenase (NADP+), ec:3.5.1.6 - N-carbamoyl-beta-alanine amidohydrolase, ec:3.2.1.31 - beta-glucuronide glucuronohydrolase glucuronidase, ec:3.5.4.5 - deaminase, ec:1.17.3.2 - oxidase, ec:2.7.4.14 - kinase, ec:1.1.1.205 - dehydrogenase, ec:2.4.2.10 - phosphoribosyltransferase, ec:…
Mj_1_GCCAAT_L005_R1_001_(paired)_trimmed_(paired)_contig_5483	alpha-Linolenic acid metabolism, Retinol metabolism, Chloroalkane and chloroalkene degradation, Glycine, serine and threonine metabolism, Fatty acid degradation, Tyrosine metabolism, Metabolism of xenobiotics by cytochrome P450, Naphthalene degradation, Drug metabolism - cytochrome P450, Methane metabolism, Glycolysis / Gluconeogenesis	map00592, map00830, map00625, map00260, map00071, map00350, map00980, map00626, map00982, map00680, map00010	11, 6, 5, 39, 14, 26, 8, 2, 7, 23, 28	ec:4.2.1.92 - dehydratase, ec:1.3.3.6 - oxidase, ec:2.3.1.16 - C-acyltransferase, ec:3.1.1.32 - A1, ec:1.3.1.42 - reductase, ec:1.1.1.1 - dehydrogenase, ec:1.13.11.12 - 13S-lipoxygenase, ec:5.3.99.6 - cyclase, ec:4.2.1.17 - hydratase, ec:2.1.1.141 - O-methyltransferase, ec:3.1.1.4 - A2, ec:1.2.1.36 - dehydrogenase, ec:1.14.14.1 - monooxygenase, ec:1.1.1.1 - dehydrogenase, ec:1.2.3.1 - oxidase, ec…
TR73103|c0_g1_i6	Drug metabolism - other enzymes, Pyrimidine metabolism	map00983, map00240	19, 31	ec:2.7.1.48 - kinase, ec:3.5.2.2 - hydantoinase, ec:3.1.1.1 - ali-esterase, ec:1.17.4.1 - reductase, ec:1.3.1.2 - dehydrogenase (NADP+), ec:3.5.1.6 - N-carbamoyl-beta-alanine amidohydrolase, ec:3.2.1.31 - beta-glucuronide glucuronohydrolase glucuronidase, ec:3.5.4.5 - deaminase, ec:1.17.3.2 - oxidase, ec:2.7.4.14 - kinase, ec:1.1.1.205 - dehydrogenase, ec:2.4.2.10 - phosphoribosyltransferase, ec:…
TR102168|c0_g1_i1	Drug metabolism - other enzymes, Purine metabolism, Pyrimidine metabolism	map00983, map00230, map00240	19, 60, 31	ec:2.7.1.48 - kinase, ec:3.5.2.2 - hydantoinase, ec:3.1.1.1 - ali-esterase, ec:1.17.4.1 - reductase, ec:1.3.1.2 - dehydrogenase (NADP+), ec:3.5.1.6 - N-carbamoyl-beta-alanine amidohydrolase, ec:3.2.1.31 - beta-glucuronide glucuronohydrolase glucuronidase, ec:3.5.4.5 - deaminase, ec:1.17.3.2 - oxidase, ec:2.7.4.14 - kinase, ec:1.1.1.205 - dehydrogenase, ec:2.4.2.10 - phosphoribosyltransferase, ec:…
TR55650|c0_g2_i1	Starch and sucrose metabolism	map00500	35	ec:3.2.1.4 - endo-1,4-beta-D-glucanase, ec:3.2.1.26 - invertase, ec:3.6.1.9 - diphosphatase, ec:2.7.7.9 - uridylyltransferase, ec:2.4.1.15 - synthase (UDP-forming), ec:3.2.1.1 - glycogenase, ec:3.2.1.39 - endo-1,3-beta-D-glucosidase, ec:2.4.1.21 - synthase (glycosyl-transferring), ec:2.4.1.12 - synthase (UDP-forming), ec:2.7.1.4 - fructokinase (phosphorylating), ec:5.3.1.9 - isomerase, ec:2.4.1.3…
TR66885|c1_g3_i6	Aminoacyl-tRNA biosynthesis	map00970	23	ec:6.1.1.22 - ligase, ec:6.1.1.3 - ligase, ec:6.1.1.10 - ligase, ec:6.1.1.18 - ligase, ec:6.1.1.7 - ligase, ec:6.1.1.23 - ligase, ec:6.1.1.14 - ligase, ec:6.1.1.4 - ligase, ec:6.1.1.20 - ligase, ec:6.1.1.11 - ligase, ec:6.1.1.1 - ligase, ec:6.1.1.19 - ligase, ec:2.1.2.9 - formyltransferase, ec:6.1.1.9 - ligase, ec:6.1.1.15 - ligase, ec:6.1.1.5 - ligase, ec:6.1.1.21 - ligase, ec:6.1.1.12 - ligase,…
TR72205|c0_g1_i7	Purine metabolism	map00230	60	ec:3.6.1.15 - phosphatase, ec:4.6.1.2 - cyclase, ec:3.2.2.7 - nucleosidase, ec:3.6.1.9 - diphosphatase, ec:1.17.4.1 - reductase, ec:2.7.4.10 - kinase, ec:6.3.3.1 - cyclo-ligase, ec:1.7.3.3 - urate hydroxylase, ec:3.1.3.5 - uridine 5'-nucleotidase, ec:2.7.1.74 - kinase, ec:6.3.2.6 - synthase, ec:3.5.3.9 - deiminase, ec:3.2.2.1 - nucleosidase, ec:1.17.3.2 - oxidase, ec:2.7.4.3 - kinase, ec:3.5.2.17…
TR71975|c0_g1_i1	Glycine, serine and threonine metabolism, Methane metabolism	map00260, map00680	39, 23	ec:2.3.1.37 - synthase, ec:2.7.1.31 - 3-kinase, ec:1.2.1.11 - dehydrogenase, ec:4.3.1.18 - ammonia-lyase, ec:4.1.2.5 - aldolase, ec:2.7.1.39 - kinase, ec:2.1.2.1 - hydroxymethyltransferase, ec:1.1.1.81 - reductase, ec:2.1.1.5 - S-methyltransferase, ec:2.6.1.45 - transaminase, ec:1.5.3.10 - oxidase, ec:2.1.2.10 - S-aminomethyldihydrolipoylprotein:(6S)-tetrahydrofolate aminomethyltransferase (ammon…
TR71975|c0_g1_i2	Glycine, serine and threonine metabolism, Methane metabolism	map00260, map00680	39, 23	ec:2.3.1.37 - synthase, ec:2.7.1.31 - 3-kinase, ec:1.2.1.11 - dehydrogenase, ec:4.3.1.18 - ammonia-lyase, ec:4.1.2.5 - aldolase, ec:2.7.1.39 - kinase, ec:2.1.2.1 - hydroxymethyltransferase, ec:1.1.1.81 - reductase, ec:2.1.1.5 - S-methyltransferase, ec:2.6.1.45 - transaminase, ec:1.5.3.10 - oxidase, ec:2.1.2.10 - S-aminomethyldihydrolipoylprotein:(6S)-tetrahydrofolate aminomethyltransferase (ammon…
TR72205|c0_g1_i5	Purine metabolism	map00230	60	ec:3.6.1.15 - phosphatase, ec:4.6.1.2 - cyclase, ec:3.2.2.7 - nucleosidase, ec:3.6.1.9 - diphosphatase, ec:1.17.4.1 - reductase, ec:2.7.4.10 - kinase, ec:6.3.3.1 - cyclo-ligase, ec:1.7.3.3 - urate hydroxylase, ec:3.1.3.5 - uridine 5'-nucleotidase, ec:2.7.1.74 - kinase, ec:6.3.2.6 - synthase, ec:3.5.3.9 - deiminase, ec:3.2.2.1 - nucleosidase, ec:1.17.3.2 - oxidase, ec:2.7.4.3 - kinase, ec:3.5.2.17…
TR72205|c0_g1_i4	Purine metabolism	map00230	60	ec:3.6.1.15 - phosphatase, ec:4.6.1.2 - cyclase, ec:3.2.2.7 - nucleosidase, ec:3.6.1.9 - diphosphatase, ec:1.17.4.1 - reductase, ec:2.7.4.10 - kinase, ec:6.3.3.1 - cyclo-ligase, ec:1.7.3.3 - urate hydroxylase, ec:3.1.3.5 - uridine 5'-nucleotidase, ec:2.7.1.74 - kinase, ec:6.3.2.6 - synthase, ec:3.5.3.9 - deiminase, ec:3.2.2.1 - nucleosidase, ec:1.17.3.2 - oxidase, ec:2.7.4.3 - kinase, ec:3.5.2.17…
TR72205|c0_g1_i1	Purine metabolism	map00230	60	ec:3.6.1.15 - phosphatase, ec:4.6.1.2 - cyclase, ec:3.2.2.7 - nucleosidase, ec:3.6.1.9 - diphosphatase, ec:1.17.4.1 - reductase, ec:2.7.4.10 - kinase, ec:6.3.3.1 - cyclo-ligase, ec:1.7.3.3 - urate hydroxylase, ec:3.1.3.5 - uridine 5'-nucleotidase, ec:2.7.1.74 - kinase, ec:6.3.2.6 - synthase, ec:3.5.3.9 - deiminase, ec:3.2.2.1 - nucleosidase, ec:1.17.3.2 - oxidase, ec:2.7.4.3 - kinase, ec:3.5.2.17…
TR61696|c0_g1_i3	mTOR signaling pathway	map04150	2	ec:2.7.11.11 - protein kinase, ec:2.7.11.24 - protein kinase
TR78282|c0_g1_i1	Cysteine and methionine metabolism	map00270	45	ec:1.13.11.53 - dioxygenase (Ni2+-requiring), ec:1.2.1.11 - dehydrogenase, ec:1.13.11.20 - dioxygenase, ec:4.4.1.14 - synthase, ec:2.6.1.57 - transaminase, ec:1.1.1.37 - dehydrogenase, ec:1.14.17.4 - oxidase, ec:2.6.1.5 - transaminase, ec:4.1.1.50 - decarboxylase, ec:2.1.1.13 - synthase, ec:2.5.1.49 - aminocarboxypropyltransferase, ec:2.3.1.30 - O-acetyltransferase, ec:2.1.1.5 - S-methyltransfera…
TR64009|c0_g1_i1	T cell receptor signaling pathway	map04660	2	ec:2.7.10.2 - protein-tyrosine kinase, ec:3.1.3.16 - phosphatase
TR59573|c0_g1_i3	T cell receptor signaling pathway, Th1 and Th2 cell differentiation, PD-L1 expression and PD-1 checkpoint pathway in cancer	map04660, map04658, map05235	2, 1, 1	ec:2.7.10.2 - protein-tyrosine kinase, ec:3.1.3.16 - phosphatase, ec:3.1.3.16 - phosphatase, ec:3.1.3.16 - phosphatase
Mj_1_GCCAAT_L005_R1_001_(paired)_trimmed_(paired)_contig_5476	Glycine, serine and threonine metabolism, Arginine biosynthesis, Cysteine and methionine metabolism, Monobactam biosynthesis, Lysine biosynthesis	map00260, map00220, map00270, map00261, map00300	39, 21, 45, 5, 12	ec:2.3.1.37 - synthase, ec:2.7.1.31 - 3-kinase, ec:1.2.1.11 - dehydrogenase, ec:4.3.1.18 - ammonia-lyase, ec:4.1.2.5 - aldolase, ec:2.7.1.39 - kinase, ec:2.1.2.1 - hydroxymethyltransferase, ec:1.1.1.81 - reductase, ec:2.1.1.5 - S-methyltransferase, ec:2.6.1.45 - transaminase, ec:1.5.3.10 - oxidase, ec:2.1.2.10 - S-aminomethyldihydrolipoylprotein:(6S)-tetrahydrofolate aminomethyltransferase (ammon…
TR59573|c0_g1_i1	T cell receptor signaling pathway, Th1 and Th2 cell differentiation, PD-L1 expression and PD-1 checkpoint pathway in cancer	map04660, map04658, map05235	2, 1, 1	ec:2.7.10.2 - protein-tyrosine kinase, ec:3.1.3.16 - phosphatase, ec:3.1.3.16 - phosphatase, ec:3.1.3.16 - phosphatase
TR66691|c0_g1_i5	Alanine, aspartate and glutamate metabolism, Arginine biosynthesis, Nitrogen metabolism	map00250, map00220, map00910	29, 21, 18	ec:1.4.1.14 - synthase (NADH), ec:4.1.1.15 - decarboxylase, ec:6.3.4.5 - synthase, ec:1.4.1.2 - dehydrogenase, ec:1.2.1.24 - dehydrogenase (NAD+), ec:6.3.1.2 - synthetase, ec:3.5.1.3 - alpha-keto acid-omega-amidase, ec:1.2.1.16 - dehydrogenase [NAD(P)+], ec:6.3.4.16 - synthase (ammonia), ec:6.3.5.5 - synthase (glutamine-hydrolysing), ec:2.6.1.1 - transaminase, ec:4.3.2.1 - lyase, ec:1.4.3.2 - oxi…
TR66691|c0_g1_i6	Alanine, aspartate and glutamate metabolism, Arginine biosynthesis, Nitrogen metabolism	map00250, map00220, map00910	29, 21, 18	ec:1.4.1.14 - synthase (NADH), ec:4.1.1.15 - decarboxylase, ec:6.3.4.5 - synthase, ec:1.4.1.2 - dehydrogenase, ec:1.2.1.24 - dehydrogenase (NAD+), ec:6.3.1.2 - synthetase, ec:3.5.1.3 - alpha-keto acid-omega-amidase, ec:1.2.1.16 - dehydrogenase [NAD(P)+], ec:6.3.4.16 - synthase (ammonia), ec:6.3.5.5 - synthase (glutamine-hydrolysing), ec:2.6.1.1 - transaminase, ec:4.3.2.1 - lyase, ec:1.4.3.2 - oxi…
TR61696|c0_g1_i4	mTOR signaling pathway	map04150	2	ec:2.7.11.11 - protein kinase, ec:2.7.11.24 - protein kinase
scaffold11184	Glycerolipid metabolism, Glycerophospholipid metabolism	map00561, map00564	24, 33	ec:2.3.1.20 - O-acyltransferase, ec:1.2.1.3 - dehydrogenase (NAD+), ec:2.7.1.31 - 3-kinase, ec:2.3.1.51 - O-acyltransferase, ec:2.7.7.9 - uridylyltransferase, ec:1.1.1.21 - reductase, ec:2.4.1.46 - synthase, ec:3.2.1.22 - melibiase, ec:2.7.1.107 - kinase (ATP), ec:3.1.1.23 - lipase, ec:2.3.1.22 - O-acyltransferase, ec:2.4.1.241 - synthase, ec:3.13.1.1 - synthase, ec:2.4.1.184 - galactosyltransfer…
scaffold11183	Glycerolipid metabolism, Glycerophospholipid metabolism	map00561, map00564	24, 33	ec:2.3.1.20 - O-acyltransferase, ec:1.2.1.3 - dehydrogenase (NAD+), ec:2.7.1.31 - 3-kinase, ec:2.3.1.51 - O-acyltransferase, ec:2.7.7.9 - uridylyltransferase, ec:1.1.1.21 - reductase, ec:2.4.1.46 - synthase, ec:3.2.1.22 - melibiase, ec:2.7.1.107 - kinase (ATP), ec:3.1.1.23 - lipase, ec:2.3.1.22 - O-acyltransferase, ec:2.4.1.241 - synthase, ec:3.13.1.1 - synthase, ec:2.4.1.184 - galactosyltransfer…
TR61696|c0_g1_i6	mTOR signaling pathway	map04150	2	ec:2.7.11.11 - protein kinase, ec:2.7.11.24 - protein kinase
TR61696|c0_g1_i7	mTOR signaling pathway	map04150	2	ec:2.7.11.11 - protein kinase, ec:2.7.11.24 - protein kinase
TR66885|c1_g3_i1	Aminoacyl-tRNA biosynthesis	map00970	23	ec:6.1.1.22 - ligase, ec:6.1.1.3 - ligase, ec:6.1.1.10 - ligase, ec:6.1.1.18 - ligase, ec:6.1.1.7 - ligase, ec:6.1.1.23 - ligase, ec:6.1.1.14 - ligase, ec:6.1.1.4 - ligase, ec:6.1.1.20 - ligase, ec:6.1.1.11 - ligase, ec:6.1.1.1 - ligase, ec:6.1.1.19 - ligase, ec:2.1.2.9 - formyltransferase, ec:6.1.1.9 - ligase, ec:6.1.1.15 - ligase, ec:6.1.1.5 - ligase, ec:6.1.1.21 - ligase, ec:6.1.1.12 - ligase,…
Mj_1_GCCAAT_L005_R1_001_(paired)_trimmed_(paired)_contig_4144	Carbon fixation in photosynthetic organisms, Pyruvate metabolism, Glyoxylate and dicarboxylate metabolism, Cysteine and methionine metabolism, Methane metabolism, Carbon fixation pathways in prokaryotes, Citrate cycle (TCA cycle)	map00710, map00620, map00630, map00270, map00680, map00720, map00020	22, 33, 34, 45, 23, 21, 18	ec:5.1.3.1 - 3-epimerase, ec:4.1.1.49 - carboxykinase (ATP), ec:2.7.2.3 - kinase, ec:1.1.1.37 - dehydrogenase, ec:5.3.1.1 - isomerase, ec:2.7.9.1 - phosphate dikinase, ec:2.6.1.1 - transaminase, ec:1.2.1.12 - dehydrogenase (phosphorylating), ec:3.1.3.11 - hexose diphosphatase, ec:5.3.1.6 - isomerase, ec:2.2.1.1 - glycolaldehydetransferase, ec:4.1.2.13 - aldolase, ec:1.1.1.82 - dehydrogenase (NADP…
TR72205|c0_g1_i9	Purine metabolism	map00230	60	ec:3.6.1.15 - phosphatase, ec:4.6.1.2 - cyclase, ec:3.2.2.7 - nucleosidase, ec:3.6.1.9 - diphosphatase, ec:1.17.4.1 - reductase, ec:2.7.4.10 - kinase, ec:6.3.3.1 - cyclo-ligase, ec:1.7.3.3 - urate hydroxylase, ec:3.1.3.5 - uridine 5'-nucleotidase, ec:2.7.1.74 - kinase, ec:6.3.2.6 - synthase, ec:3.5.3.9 - deiminase, ec:3.2.2.1 - nucleosidase, ec:1.17.3.2 - oxidase, ec:2.7.4.3 - kinase, ec:3.5.2.17…
TR72205|c0_g1_i8	Purine metabolism	map00230	60	ec:3.6.1.15 - phosphatase, ec:4.6.1.2 - cyclase, ec:3.2.2.7 - nucleosidase, ec:3.6.1.9 - diphosphatase, ec:1.17.4.1 - reductase, ec:2.7.4.10 - kinase, ec:6.3.3.1 - cyclo-ligase, ec:1.7.3.3 - urate hydroxylase, ec:3.1.3.5 - uridine 5'-nucleotidase, ec:2.7.1.74 - kinase, ec:6.3.2.6 - synthase, ec:3.5.3.9 - deiminase, ec:3.2.2.1 - nucleosidase, ec:1.17.3.2 - oxidase, ec:2.7.4.3 - kinase, ec:3.5.2.17…
TR84991|c0_g1_i1	Purine metabolism	map00230	60	ec:3.6.1.15 - phosphatase, ec:4.6.1.2 - cyclase, ec:3.2.2.7 - nucleosidase, ec:3.6.1.9 - diphosphatase, ec:1.17.4.1 - reductase, ec:2.7.4.10 - kinase, ec:6.3.3.1 - cyclo-ligase, ec:1.7.3.3 - urate hydroxylase, ec:3.1.3.5 - uridine 5'-nucleotidase, ec:2.7.1.74 - kinase, ec:6.3.2.6 - synthase, ec:3.5.3.9 - deiminase, ec:3.2.2.1 - nucleosidase, ec:1.17.3.2 - oxidase, ec:2.7.4.3 - kinase, ec:3.5.2.17…
C888207	Phosphatidylinositol signaling system, Inositol phosphate metabolism	map04070, map00562	20, 25	ec:2.7.1.127 - 3-kinase, ec:2.7.1.158 - 2-kinase, ec:3.1.3.56 - 5-phosphatase, ec:2.7.1.107 - kinase (ATP), ec:2.7.1.137 - 3-kinase, ec:2.7.1.151 - multikinase, ec:3.1.4.11 - phospholipase C, ec:2.7.1.159 - 5/6-kinase, ec:3.1.3.36 - 5-phosphatase, ec:2.7.11.13 - kinase C, ec:3.1.3.57 - 1-phosphatase, ec:2.7.1.67 - 4-kinase, ec:2.7.8.11 - 3-phosphatidyltransferase, ec:2.7.7.41 - cytidylyltransfera…
TR67010|c1_g1_i5	Steroid hormone biosynthesis, Steroid degradation, Primary bile acid biosynthesis	map00140, map00984, map00120	12, 3, 3	ec:1.1.1.51 - 17)beta-hydroxysteroid dehydrogenase, ec:1.14.14.1 - monooxygenase, ec:1.3.1.3 - 5beta-reductase, ec:2.1.1.6 - O-methyltransferase, ec:1.1.1.145 - dehydrogenase, ec:1.1.1.62 - 17-dehydrogenase, ec:2.4.1.17 - 1-naphthol glucuronyltransferase, ec:1.1.1.53 - 20beta)-hydroxysteroid dehydrogenase, ec:1.1.1.149 - dehydrogenase, ec:1.3.1.22 - 4-dehydrogenase (NADP+), ec:1.1.1.146 - dehydro…
TR67010|c1_g1_i8	Steroid hormone biosynthesis, Steroid degradation, Primary bile acid biosynthesis	map00140, map00984, map00120	12, 3, 3	ec:1.1.1.51 - 17)beta-hydroxysteroid dehydrogenase, ec:1.14.14.1 - monooxygenase, ec:1.3.1.3 - 5beta-reductase, ec:2.1.1.6 - O-methyltransferase, ec:1.1.1.145 - dehydrogenase, ec:1.1.1.62 - 17-dehydrogenase, ec:2.4.1.17 - 1-naphthol glucuronyltransferase, ec:1.1.1.53 - 20beta)-hydroxysteroid dehydrogenase, ec:1.1.1.149 - dehydrogenase, ec:1.3.1.22 - 4-dehydrogenase (NADP+), ec:1.1.1.146 - dehydro…
TR8229|c0_g1_i1	Fatty acid biosynthesis	map00061	12	ec:6.2.1.3 - ligase, ec:2.3.1.85 - synthase system, ec:6.4.1.2 - carboxylase, ec:3.1.2.14 - hydrolase, ec:4.2.1.59 - dehydratase, ec:2.3.1.86 - synthase system, ec:2.3.1.180 - synthase III, ec:2.3.1.39 - S-malonyltransferase, ec:2.3.1.41 - synthase I, ec:1.1.1.100 - reductase, ec:1.14.19.2 - 9-desaturase, ec:1.3.1.9 - reductase (NADH)
TR78165|c1_g4_i1	Biosynthesis of siderophore group nonribosomal peptides, Ubiquinone and other terpenoid-quinone biosynthesis	map01053, map00130	3, 14	ec:1.3.1.28 - dehydrogenase, ec:3.3.2.1 - 2,3-dihydro-2,3-dihydroxybenzoate synthase, ec:5.4.4.2 - synthase, ec:2.5.1.39 - polyprenyltransferase, ec:1.1.1.237 - reductase, ec:1.6.5.2 - dehydrogenase (quinone), ec:2.1.1.64 - 3-O-methyltransferase, ec:2.1.1.95 - C-methyltransferase, ec:4.1.3.36 - synthase, ec:1.13.11.27 - dioxygenase, ec:2.6.1.5 - transaminase, ec:4.2.99.20 - synthase, ec:6.2.1.26 …
TR24093|c0_g1_i1	Amino sugar and nucleotide sugar metabolism	map00520	46	ec:5.1.3.2 - 4-epimerase, ec:2.4.2.24 - synthase, ec:2.7.7.9 - uridylyltransferase, ec:2.7.1.7 - mannokinase (phosphorylating), ec:5.4.2.8 - mannose phosphomutase, ec:2.7.1.44 - galacturonokinase (phosphorylating) D-galacturonic acid kinase, ec:2.7.7.22 - guanylyltransferase (GDP), ec:5.1.3.6 - 4-epimerase, ec:3.2.1.14 - ChiC, ec:2.7.7.13 - guanylyltransferase, ec:5.1.3.12 - 5'-epimerase, ec:2.7.…
Mj_1_GCCAAT_L005_R1_001_(paired)_trimmed_(paired)_contig_106383	Other glycan degradation	map00511	8	ec:3.2.1.23 - lactase (ambiguous), ec:3.5.1.26 - aspartylglucosylamine deaspartylase, ec:3.2.1.96 - endo-beta-N-acetylglucosaminidase, ec:3.2.1.24 - alpha-D-mannosidase, ec:3.2.1.45 - psychosine hydrolase, ec:3.2.1.51 - alpha-fucosidase, ec:3.2.1.25 - mannanase, ec:3.2.1.52 - hexosaminidase
TR78240|c0_g3_i1	Phenylpropanoid biosynthesis	map00940	17	ec:3.2.1.126 - beta-glucosidase, ec:1.1.1.195 - dehydrogenase, ec:1.11.1.7 - lactoperoxidase, ec:2.1.1.146 - O-methyltransferase, ec:1.2.1.68 - dehydrogenase, ec:4.3.1.24 - ammonia-lyase, ec:2.1.1.104 - O-methyltransferase, ec:2.4.1.111 - glucosyltransferase, ec:2.4.1.128 - glucosyltransferase, ec:2.3.1.92 - O-sinapoyltransferase, ec:1.2.1.44 - reductase, ec:2.3.1.99 - O-hydroxycinnamoyltransfera…
TR109828|c0_g1_i1	N-Glycan biosynthesis, Various types of N-glycan biosynthesis	map00510, map00513	18, 15	ec:2.4.1.101 - 2-beta-N-acetylglucosaminyltransferase, ec:2.4.1.117 - beta-glucosyltransferase, ec:2.4.1.259 - alpha-1,2-mannosyltransferase, ec:2.4.1.131 - alpha-1,2-mannosyltransferase, ec:2.4.1.144 - 4-beta-N-acetylglucosaminyltransferase, ec:2.4.1.261 - alpha-1,2-mannosyltransferase, ec:3.2.1.106 - glucosidase, ec:2.4.1.132 - alpha-1,3-mannosyltransferase, ec:3.6.1.43 - dolichol diphosphatase…
TR79018|c0_g1_i4	Phosphatidylinositol signaling system, Inositol phosphate metabolism	map04070, map00562	20, 25	ec:2.7.1.127 - 3-kinase, ec:2.7.1.158 - 2-kinase, ec:3.1.3.56 - 5-phosphatase, ec:2.7.1.107 - kinase (ATP), ec:2.7.1.137 - 3-kinase, ec:2.7.1.151 - multikinase, ec:3.1.4.11 - phospholipase C, ec:2.7.1.159 - 5/6-kinase, ec:3.1.3.36 - 5-phosphatase, ec:2.7.11.13 - kinase C, ec:3.1.3.57 - 1-phosphatase, ec:2.7.1.67 - 4-kinase, ec:2.7.8.11 - 3-phosphatidyltransferase, ec:2.7.7.41 - cytidylyltransfera…
TR78240|c0_g3_i2	Phenylpropanoid biosynthesis	map00940	17	ec:3.2.1.126 - beta-glucosidase, ec:1.1.1.195 - dehydrogenase, ec:1.11.1.7 - lactoperoxidase, ec:2.1.1.146 - O-methyltransferase, ec:1.2.1.68 - dehydrogenase, ec:4.3.1.24 - ammonia-lyase, ec:2.1.1.104 - O-methyltransferase, ec:2.4.1.111 - glucosyltransferase, ec:2.4.1.128 - glucosyltransferase, ec:2.3.1.92 - O-sinapoyltransferase, ec:1.2.1.44 - reductase, ec:2.3.1.99 - O-hydroxycinnamoyltransfera…
TR79018|c0_g1_i1	Phosphatidylinositol signaling system, Inositol phosphate metabolism	map04070, map00562	20, 25	ec:2.7.1.127 - 3-kinase, ec:2.7.1.158 - 2-kinase, ec:3.1.3.56 - 5-phosphatase, ec:2.7.1.107 - kinase (ATP), ec:2.7.1.137 - 3-kinase, ec:2.7.1.151 - multikinase, ec:3.1.4.11 - phospholipase C, ec:2.7.1.159 - 5/6-kinase, ec:3.1.3.36 - 5-phosphatase, ec:2.7.11.13 - kinase C, ec:3.1.3.57 - 1-phosphatase, ec:2.7.1.67 - 4-kinase, ec:2.7.8.11 - 3-phosphatidyltransferase, ec:2.7.7.41 - cytidylyltransfera…
TR79018|c0_g1_i7	Phosphatidylinositol signaling system, Inositol phosphate metabolism	map04070, map00562	20, 25	ec:2.7.1.127 - 3-kinase, ec:2.7.1.158 - 2-kinase, ec:3.1.3.56 - 5-phosphatase, ec:2.7.1.107 - kinase (ATP), ec:2.7.1.137 - 3-kinase, ec:2.7.1.151 - multikinase, ec:3.1.4.11 - phospholipase C, ec:2.7.1.159 - 5/6-kinase, ec:3.1.3.36 - 5-phosphatase, ec:2.7.11.13 - kinase C, ec:3.1.3.57 - 1-phosphatase, ec:2.7.1.67 - 4-kinase, ec:2.7.8.11 - 3-phosphatidyltransferase, ec:2.7.7.41 - cytidylyltransfera…
TR75949|c1_g1_i2	Thiamine metabolism, Riboflavin metabolism	map00730, map00740	12, 12	ec:3.6.1.15 - phosphatase, ec:2.7.4.7 - kinase, ec:2.8.1.7 - desulfurase, ec:2.7.6.2 - diphosphokinase, ec:2.7.1.50 - kinase, ec:2.7.4.3 - kinase, ec:2.7.1.49 - kinase, ec:3.5.99.2 - aminohydrolase, ec:2.5.1.3 - phosphate synthase, ec:3.1.3.2 - phosphatase, ec:4.1.99.19 - synthase, ec:2.2.1.7 - synthase, ec:3.6.1.9 - diphosphatase, ec:3.5.4.25 - cyclohydrolase II, ec:2.7.7.2 - synthase, ec:1.5.1.…
TR58278|c0_g1_i1	Ascorbate and aldarate metabolism	map00053	18	ec:1.11.1.11 - peroxidase, ec:1.2.1.3 - dehydrogenase (NAD+), ec:4.1.2.20 - aldolase, ec:1.8.5.1 - dehydrogenase (ascorbate), ec:1.1.1.122 - 1-dehydrogenase, ec:1.10.3.3 - oxidase, ec:2.7.7.44 - uridylyltransferase, ec:1.1.3.8 - oxidase, ec:1.1.1.22 - 6-dehydrogenase, ec:1.3.2.3 - dehydrogenase, ec:1.6.5.4 - reductase (NADH), ec:1.13.99.1 - oxygenase, ec:5.1.3.18 - 3,5-epimerase, ec:2.4.1.17 - 1-…
Mj_1_GCCAAT_L005_R1_001_(paired)_trimmed_(paired)_contig_106392	Glycine, serine and threonine metabolism, Phenylalanine, tyrosine and tryptophan biosynthesis	map00260, map00400	39, 27	ec:2.3.1.37 - synthase, ec:2.7.1.31 - 3-kinase, ec:1.2.1.11 - dehydrogenase, ec:4.3.1.18 - ammonia-lyase, ec:4.1.2.5 - aldolase, ec:2.7.1.39 - kinase, ec:2.1.2.1 - hydroxymethyltransferase, ec:1.1.1.81 - reductase, ec:2.1.1.5 - S-methyltransferase, ec:2.6.1.45 - transaminase, ec:1.5.3.10 - oxidase, ec:2.1.2.10 - S-aminomethyldihydrolipoylprotein:(6S)-tetrahydrofolate aminomethyltransferase (ammon…
scaffold11172	T cell receptor signaling pathway	map04660	2	ec:2.7.10.2 - protein-tyrosine kinase, ec:3.1.3.16 - phosphatase
TR78240|c0_g3_i3	Phenylpropanoid biosynthesis	map00940	17	ec:3.2.1.126 - beta-glucosidase, ec:1.1.1.195 - dehydrogenase, ec:1.11.1.7 - lactoperoxidase, ec:2.1.1.146 - O-methyltransferase, ec:1.2.1.68 - dehydrogenase, ec:4.3.1.24 - ammonia-lyase, ec:2.1.1.104 - O-methyltransferase, ec:2.4.1.111 - glucosyltransferase, ec:2.4.1.128 - glucosyltransferase, ec:2.3.1.92 - O-sinapoyltransferase, ec:1.2.1.44 - reductase, ec:2.3.1.99 - O-hydroxycinnamoyltransfera…
Mj_1_GCCAAT_L005_R1_001_(paired)_trimmed_(paired)_contig_4175	Folate biosynthesis, Riboflavin metabolism	map00790, map00740	17, 12	ec:3.4.19.9 - gamma-glutamyl hydrolase, ec:2.5.1.15 - synthase, ec:1.1.1.21 - reductase, ec:6.3.2.12 - synthase, ec:2.10.1.1 - molybdotransferase, ec:4.2.1.96 - dehydratase, ec:3.5.4.25 - cyclohydrolase II, ec:3.5.4.16 - cyclohydrolase I, ec:6.3.2.17 - synthase, ec:2.7.6.3 - diphosphokinase, ec:2.6.1.85 - synthase, ec:1.1.1.184 - reductase (NADPH), ec:2.7.7.75 - adenylyltransferase, ec:4.1.2.25 -…
TR130692|c0_g1_i1	Starch and sucrose metabolism	map00500	35	ec:3.2.1.4 - endo-1,4-beta-D-glucanase, ec:3.2.1.26 - invertase, ec:3.6.1.9 - diphosphatase, ec:2.7.7.9 - uridylyltransferase, ec:2.4.1.15 - synthase (UDP-forming), ec:3.2.1.1 - glycogenase, ec:3.2.1.39 - endo-1,3-beta-D-glucosidase, ec:2.4.1.21 - synthase (glycosyl-transferring), ec:2.4.1.12 - synthase (UDP-forming), ec:2.7.1.4 - fructokinase (phosphorylating), ec:5.3.1.9 - isomerase, ec:2.4.1.3…
Mj_1_GCCAAT_L005_R1_001_(paired)_trimmed_(paired)_contig_105048	Pyruvate metabolism, Histidine metabolism, Chloroalkane and chloroalkene degradation, Ascorbate and aldarate metabolism, Lysine degradation, Fatty acid degradation, Tyrosine metabolism, Metabolism of xenobiotics by cytochrome P450, Arginine and proline metabolism, Limonene and pinene degradation, Tryptophan metabolism, Glycerolipid metabolism, Phenylalanine metabolism, beta-Alanine metabolism, Va…	map00620, map00340, map00625, map00053, map00310, map00071, map00350, map00980, map00330, map00903, map00380, map00561, map00360, map00410, map00280, map00982, map00010, map00981	33, 13, 5, 18, 12, 14, 26, 8, 28, 2, 29, 24, 22, 17, 21, 7, 28, 2	ec:4.1.1.32 - carboxykinase (GTP), ec:1.2.1.3 - dehydrogenase (NAD+), ec:1.1.1.79 - reductase (NADP+), ec:4.1.1.49 - carboxykinase (ATP), ec:2.3.1.12 - acetyltransferase, ec:1.1.2.3 - dehydrogenase (cytochrome), ec:1.1.1.37 - dehydrogenase, ec:1.1.1.28 - dehydrogenase, ec:3.1.2.1 - hydrolase, ec:2.7.9.1 - phosphate dikinase, ec:6.4.1.2 - carboxylase, ec:1.1.2.4 - dehydrogenase (cytochrome), ec:3.…
Mj_1_GCCAAT_L005_R1_001_(paired)_trimmed_(paired)_contig_105041	Pyruvate metabolism, Carbon fixation pathways in prokaryotes, Citrate cycle (TCA cycle)	map00620, map00720, map00020	33, 21, 18	ec:4.1.1.32 - carboxykinase (GTP), ec:1.2.1.3 - dehydrogenase (NAD+), ec:1.1.1.79 - reductase (NADP+), ec:4.1.1.49 - carboxykinase (ATP), ec:2.3.1.12 - acetyltransferase, ec:1.1.2.3 - dehydrogenase (cytochrome), ec:1.1.1.37 - dehydrogenase, ec:1.1.1.28 - dehydrogenase, ec:3.1.2.1 - hydrolase, ec:2.7.9.1 - phosphate dikinase, ec:6.4.1.2 - carboxylase, ec:1.1.2.4 - dehydrogenase (cytochrome), ec:3.…
Mj_1_GCCAAT_L005_R1_001_(paired)_trimmed_(paired)_contig_106373	Propanoate metabolism, C5-Branched dibasic acid metabolism, Carbon fixation pathways in prokaryotes, Citrate cycle (TCA cycle)	map00640, map00660, map00720, map00020	21, 5, 21, 18	ec:4.1.1.9 - decarboxylase, ec:2.3.1.168 - (2-methylpropanoyl)transferase, ec:1.3.3.6 - oxidase, ec:4.2.1.79 - dehydratase, ec:6.4.1.2 - carboxylase, ec:4.1.3.30 - lyase, ec:2.6.1.19 - transaminase, ec:6.2.1.4 - ligase (GDP-forming), ec:6.2.1.1 - ligase, ec:6.4.1.3 - carboxylase, ec:1.8.1.4 - dehydrogenase, ec:1.2.4.4 - dehydrogenase (2-methylpropanoyl-transferring), ec:2.8.3.8 - CoA-transferase,…
TR96545|c0_g1_i1	Carbon fixation in photosynthetic organisms, Pyruvate metabolism, Glyoxylate and dicarboxylate metabolism, Cysteine and methionine metabolism, Methane metabolism, Carbon fixation pathways in prokaryotes, Citrate cycle (TCA cycle)	map00710, map00620, map00630, map00270, map00680, map00720, map00020	22, 33, 34, 45, 23, 21, 18	ec:5.1.3.1 - 3-epimerase, ec:4.1.1.49 - carboxykinase (ATP), ec:2.7.2.3 - kinase, ec:1.1.1.37 - dehydrogenase, ec:5.3.1.1 - isomerase, ec:2.7.9.1 - phosphate dikinase, ec:2.6.1.1 - transaminase, ec:1.2.1.12 - dehydrogenase (phosphorylating), ec:3.1.3.11 - hexose diphosphatase, ec:5.3.1.6 - isomerase, ec:2.2.1.1 - glycolaldehydetransferase, ec:4.1.2.13 - aldolase, ec:1.1.1.82 - dehydrogenase (NADP…
TR65718|c0_g1_i2	Aminoacyl-tRNA biosynthesis	map00970	23	ec:6.1.1.22 - ligase, ec:6.1.1.3 - ligase, ec:6.1.1.10 - ligase, ec:6.1.1.18 - ligase, ec:6.1.1.7 - ligase, ec:6.1.1.23 - ligase, ec:6.1.1.14 - ligase, ec:6.1.1.4 - ligase, ec:6.1.1.20 - ligase, ec:6.1.1.11 - ligase, ec:6.1.1.1 - ligase, ec:6.1.1.19 - ligase, ec:2.1.2.9 - formyltransferase, ec:6.1.1.9 - ligase, ec:6.1.1.15 - ligase, ec:6.1.1.5 - ligase, ec:6.1.1.21 - ligase, ec:6.1.1.12 - ligase,…
TR67429|c1_g1_i2	Thiamine metabolism, Terpenoid backbone biosynthesis	map00730, map00900	12, 27	ec:3.6.1.15 - phosphatase, ec:2.7.4.7 - kinase, ec:2.8.1.7 - desulfurase, ec:2.7.6.2 - diphosphokinase, ec:2.7.1.50 - kinase, ec:2.7.4.3 - kinase, ec:2.7.1.49 - kinase, ec:3.5.99.2 - aminohydrolase, ec:2.5.1.3 - phosphate synthase, ec:3.1.3.2 - phosphatase, ec:4.1.99.19 - synthase, ec:2.2.1.7 - synthase, ec:2.7.4.2 - kinase, ec:2.5.1.84 - diphosphate synthase [geranyl-diphosphate specific], ec:4.…
TR67429|c1_g1_i1	Thiamine metabolism, Terpenoid backbone biosynthesis	map00730, map00900	12, 27	ec:3.6.1.15 - phosphatase, ec:2.7.4.7 - kinase, ec:2.8.1.7 - desulfurase, ec:2.7.6.2 - diphosphokinase, ec:2.7.1.50 - kinase, ec:2.7.4.3 - kinase, ec:2.7.1.49 - kinase, ec:3.5.99.2 - aminohydrolase, ec:2.5.1.3 - phosphate synthase, ec:3.1.3.2 - phosphatase, ec:4.1.99.19 - synthase, ec:2.2.1.7 - synthase, ec:2.7.4.2 - kinase, ec:2.5.1.84 - diphosphate synthase [geranyl-diphosphate specific], ec:4.…
TR67429|c1_g1_i4	Thiamine metabolism, Terpenoid backbone biosynthesis	map00730, map00900	12, 27	ec:3.6.1.15 - phosphatase, ec:2.7.4.7 - kinase, ec:2.8.1.7 - desulfurase, ec:2.7.6.2 - diphosphokinase, ec:2.7.1.50 - kinase, ec:2.7.4.3 - kinase, ec:2.7.1.49 - kinase, ec:3.5.99.2 - aminohydrolase, ec:2.5.1.3 - phosphate synthase, ec:3.1.3.2 - phosphatase, ec:4.1.99.19 - synthase, ec:2.2.1.7 - synthase, ec:2.7.4.2 - kinase, ec:2.5.1.84 - diphosphate synthase [geranyl-diphosphate specific], ec:4.…
Mj_1_GCCAAT_L005_R1_001_(paired)_trimmed_(paired)_contig_30707	Glycosylphosphatidylinositol (GPI)-anchor biosynthesis	map00563	2	ec:3.5.1.89 - deacetylase, ec:2.4.1.198 - N-acetylglucosaminyltransferase
TR63547|c1_g1_i5	alpha-Linolenic acid metabolism, Lysine degradation, Fatty acid degradation, Aminobenzoate degradation, Limonene and pinene degradation, Tryptophan metabolism, Caprolactam degradation, Geraniol degradation, Propanoate metabolism, Phenylalanine metabolism, Benzoate degradation, beta-Alanine metabolism, Valine, leucine and isoleucine degradation, Butanoate metabolism, Fatty acid elongation, Carbon …	map00592, map00310, map00071, map00627, map00903, map00380, map00930, map00281, map00640, map00360, map00362, map00410, map00280, map00650, map00062, map00720	11, 12, 14, 11, 2, 29, 8, 4, 21, 22, 10, 17, 21, 19, 7, 21	ec:4.2.1.92 - dehydratase, ec:1.3.3.6 - oxidase, ec:2.3.1.16 - C-acyltransferase, ec:3.1.1.32 - A1, ec:1.3.1.42 - reductase, ec:1.1.1.1 - dehydrogenase, ec:1.13.11.12 - 13S-lipoxygenase, ec:5.3.99.6 - cyclase, ec:4.2.1.17 - hydratase, ec:2.1.1.141 - O-methyltransferase, ec:3.1.1.4 - A2, ec:1.2.1.3 - dehydrogenase (NAD+), ec:1.5.1.10 - dehydrogenase (NADP+, L-glutamate-forming), ec:1.2.4.2 - dehyd…
TR63547|c1_g1_i4	alpha-Linolenic acid metabolism, Lysine degradation, Fatty acid degradation, Nitrogen metabolism, Aminobenzoate degradation, Limonene and pinene degradation, Tryptophan metabolism, Caprolactam degradation, Geraniol degradation, Propanoate metabolism, Phenylalanine metabolism, Benzoate degradation, beta-Alanine metabolism, Valine, leucine and isoleucine degradation, Butanoate metabolism, Fatty aci…	map00592, map00310, map00071, map00910, map00627, map00903, map00380, map00930, map00281, map00640, map00360, map00362, map00410, map00280, map00650, map00062, map00720	11, 12, 14, 18, 11, 2, 29, 8, 4, 21, 22, 10, 17, 21, 19, 7, 21	ec:4.2.1.92 - dehydratase, ec:1.3.3.6 - oxidase, ec:2.3.1.16 - C-acyltransferase, ec:3.1.1.32 - A1, ec:1.3.1.42 - reductase, ec:1.1.1.1 - dehydrogenase, ec:1.13.11.12 - 13S-lipoxygenase, ec:5.3.99.6 - cyclase, ec:4.2.1.17 - hydratase, ec:2.1.1.141 - O-methyltransferase, ec:3.1.1.4 - A2, ec:1.2.1.3 - dehydrogenase (NAD+), ec:1.5.1.10 - dehydrogenase (NADP+, L-glutamate-forming), ec:1.2.4.2 - dehyd…
TR55060|c0_g1_i1	T cell receptor signaling pathway, Th1 and Th2 cell differentiation, PD-L1 expression and PD-1 checkpoint pathway in cancer	map04660, map04658, map05235	2, 1, 1	ec:2.7.10.2 - protein-tyrosine kinase, ec:3.1.3.16 - phosphatase, ec:3.1.3.16 - phosphatase, ec:3.1.3.16 - phosphatase
TR63547|c1_g1_i1	alpha-Linolenic acid metabolism, Lysine degradation, Fatty acid degradation, Aminobenzoate degradation, Limonene and pinene degradation, Tryptophan metabolism, Caprolactam degradation, Geraniol degradation, Propanoate metabolism, Phenylalanine metabolism, Benzoate degradation, beta-Alanine metabolism, Valine, leucine and isoleucine degradation, Butanoate metabolism, Fatty acid elongation, Carbon …	map00592, map00310, map00071, map00627, map00903, map00380, map00930, map00281, map00640, map00360, map00362, map00410, map00280, map00650, map00062, map00720	11, 12, 14, 11, 2, 29, 8, 4, 21, 22, 10, 17, 21, 19, 7, 21	ec:4.2.1.92 - dehydratase, ec:1.3.3.6 - oxidase, ec:2.3.1.16 - C-acyltransferase, ec:3.1.1.32 - A1, ec:1.3.1.42 - reductase, ec:1.1.1.1 - dehydrogenase, ec:1.13.11.12 - 13S-lipoxygenase, ec:5.3.99.6 - cyclase, ec:4.2.1.17 - hydratase, ec:2.1.1.141 - O-methyltransferase, ec:3.1.1.4 - A2, ec:1.2.1.3 - dehydrogenase (NAD+), ec:1.5.1.10 - dehydrogenase (NADP+, L-glutamate-forming), ec:1.2.4.2 - dehyd…
TR85148|c0_g1_i1	Galactose metabolism, Starch and sucrose metabolism	map00052, map00500	20, 35	ec:5.1.3.2 - 4-epimerase, ec:3.2.1.26 - invertase, ec:2.7.7.9 - uridylyltransferase, ec:1.1.1.21 - reductase, ec:3.2.1.23 - lactase (ambiguous), ec:3.2.1.22 - melibiase, ec:2.7.1.11 - phosphohexokinase, ec:2.4.1.67 - galactosyltransferase, ec:5.1.3.3 - 1-epimerase, ec:2.7.7.10 - uridylyltransferase, ec:2.7.1.1 - hexokinase type IV glucokinase, ec:2.4.1.123 - 3-alpha-galactosyltransferase, ec:2.4.…
TR79847|c3_g9_i3	Anthocyanin biosynthesis	map00942	4	ec:2.4.1.238 - 3,5-di-O-glucoside 3'-O-glucosyltransferase, ec:2.3.1.153 - 5-(6'''-hydroxycinnamoyltransferase), ec:2.4.1.115 - 3-O-glucosyltransferase, ec:2.3.1.171 - 6''-O-malonyltransferase
TR34375|c0_g1_i1	Glutathione metabolism, Phenylpropanoid biosynthesis	map00480, map00940	19, 17	ec:1.11.1.11 - peroxidase, ec:1.17.4.1 - reductase, ec:3.5.2.9 - (ATP-hydrolysing), ec:1.8.5.1 - dehydrogenase (ascorbate), ec:1.11.1.15 - to 1.11.1.24 and 1.11.1.25 and 1.11.1.26 and 1.11.1.27 and 1.11.1.28 and 1.11.1.29, ec:1.1.1.42 - dehydrogenase (NADP+), ec:1.11.1.12 - glutathione peroxidase, ec:2.5.1.16 - synthase, ec:6.3.2.2 - ligase, ec:1.8.1.7 - reductase, ec:3.4.19.13 - gamma-glutamate …
TR71483|c1_g3_i1	Porphyrin and chlorophyll metabolism	map00860	31	ec:2.3.1.37 - synthase, ec:3.1.1.14 - CLH, ec:1.3.7.4 - oxidoreductase, ec:4.99.1.4 - ferrochelatase, ec:4.2.1.75 - synthase, ec:3.2.1.31 - beta-glucuronide glucuronohydrolase glucuronidase, ec:4.1.1.37 - decarboxylase, ec:1.3.1.75 - protochlorophyllide a 8-vinyl-reductase (NADPH), ec:4.2.1.24 - synthase, ec:5.4.3.8 - 2,1-aminomutase, ec:1.3.1.33 - reductase, ec:2.1.1.107 - C-methyltransferase, e…
TR128572|c0_g1_i1	Purine metabolism, Nicotinate and nicotinamide metabolism, Pyrimidine metabolism	map00230, map00760, map00240	60, 17, 31	ec:3.6.1.15 - phosphatase, ec:4.6.1.2 - cyclase, ec:3.2.2.7 - nucleosidase, ec:3.6.1.9 - diphosphatase, ec:1.17.4.1 - reductase, ec:2.7.4.10 - kinase, ec:6.3.3.1 - cyclo-ligase, ec:1.7.3.3 - urate hydroxylase, ec:3.1.3.5 - uridine 5'-nucleotidase, ec:2.7.1.74 - kinase, ec:6.3.2.6 - synthase, ec:3.5.3.9 - deiminase, ec:3.2.2.1 - nucleosidase, ec:1.17.3.2 - oxidase, ec:2.7.4.3 - kinase, ec:3.5.2.17…
Mj_1_GCCAAT_L005_R1_001_(paired)_trimmed_(paired)_contig_105075	Pentose and glucuronate interconversions	map00040	20	ec:2.7.1.17 - xylulokinase (phosphorylating), ec:5.1.3.1 - 3-epimerase, ec:5.3.1.5 - isomerase, ec:2.7.7.9 - uridylyltransferase, ec:1.1.1.21 - reductase, ec:3.2.1.31 - beta-glucuronide glucuronohydrolase glucuronidase, ec:1.1.1.12 - 4-dehydrogenase, ec:2.7.7.44 - uridylyltransferase, ec:1.1.1.22 - 6-dehydrogenase, ec:1.1.1.9 - reductase, ec:3.1.1.11 - pectin demethoxylase, ec:3.2.1.15 - pectin d…
C839210	Starch and sucrose metabolism	map00500	35	ec:3.2.1.4 - endo-1,4-beta-D-glucanase, ec:3.2.1.26 - invertase, ec:3.6.1.9 - diphosphatase, ec:2.7.7.9 - uridylyltransferase, ec:2.4.1.15 - synthase (UDP-forming), ec:3.2.1.1 - glycogenase, ec:3.2.1.39 - endo-1,3-beta-D-glucosidase, ec:2.4.1.21 - synthase (glycosyl-transferring), ec:2.4.1.12 - synthase (UDP-forming), ec:2.7.1.4 - fructokinase (phosphorylating), ec:5.3.1.9 - isomerase, ec:2.4.1.3…
TR69171|c0_g1_i2	Glycerophospholipid metabolism	map00564	33	ec:3.1.4.4 - D, ec:3.1.1.52 - deacylase, ec:2.3.1.51 - O-acyltransferase, ec:2.7.8.5 - 1-phosphatidyltransferase, ec:2.1.1.17 - N-methyltransferase, ec:1.1.1.8 - dehydrogenase (NAD+), ec:2.7.8.1 - EPT, ec:2.1.1.103 - N-methyltransferase, ec:2.7.1.107 - kinase (ATP), ec:3.1.1.32 - A1, ec:3.6.1.16 - diphosphatase, ec:2.7.1.32 - kinase, ec:3.1.3.75 - phosphatase, ec:1.1.1.94 - dehydrogenase [NAD(P)+…
TR75081|c0_g1_i1	Purine metabolism	map00230	60	ec:3.6.1.15 - phosphatase, ec:4.6.1.2 - cyclase, ec:3.2.2.7 - nucleosidase, ec:3.6.1.9 - diphosphatase, ec:1.17.4.1 - reductase, ec:2.7.4.10 - kinase, ec:6.3.3.1 - cyclo-ligase, ec:1.7.3.3 - urate hydroxylase, ec:3.1.3.5 - uridine 5'-nucleotidase, ec:2.7.1.74 - kinase, ec:6.3.2.6 - synthase, ec:3.5.3.9 - deiminase, ec:3.2.2.1 - nucleosidase, ec:1.17.3.2 - oxidase, ec:2.7.4.3 - kinase, ec:3.5.2.17…
TR76611|c0_g1_i1	Thiamine metabolism, Glycerolipid metabolism, Riboflavin metabolism, Glycerophospholipid metabolism, Sphingolipid metabolism, Ether lipid metabolism	map00730, map00561, map00740, map00564, map00600, map00565	12, 24, 12, 33, 14, 7	ec:3.6.1.15 - phosphatase, ec:2.7.4.7 - kinase, ec:2.8.1.7 - desulfurase, ec:2.7.6.2 - diphosphokinase, ec:2.7.1.50 - kinase, ec:2.7.4.3 - kinase, ec:2.7.1.49 - kinase, ec:3.5.99.2 - aminohydrolase, ec:2.5.1.3 - phosphate synthase, ec:3.1.3.2 - phosphatase, ec:4.1.99.19 - synthase, ec:2.2.1.7 - synthase, ec:2.3.1.20 - O-acyltransferase, ec:1.2.1.3 - dehydrogenase (NAD+), ec:2.7.1.31 - 3-kinase, e…
TR69441|c0_g1_i2	Phenylalanine, tyrosine and tryptophan biosynthesis	map00400	27	ec:1.1.1.24 - dehydrogenase, ec:4.1.1.48 - synthase, ec:2.6.1.57 - transaminase, ec:1.1.1.282 - dehydrogenase, ec:4.1.3.27 - synthase, ec:2.6.1.5 - transaminase, ec:2.6.1.79 - aminotransferase, ec:2.5.1.19 - 1-carboxyvinyltransferase, ec:1.3.1.12 - dehydrogenase, ec:4.2.3.5 - synthase, ec:2.6.1.1 - transaminase, ec:1.1.1.25 - dehydrogenase, ec:2.5.1.54 - synthase, ec:2.7.1.71 - kinase, ec:2.6.1.9…
TR76560|c2_g1_i3	T cell receptor signaling pathway, Th1 and Th2 cell differentiation, PD-L1 expression and PD-1 checkpoint pathway in cancer	map04660, map04658, map05235	2, 1, 1	ec:2.7.10.2 - protein-tyrosine kinase, ec:3.1.3.16 - phosphatase, ec:3.1.3.16 - phosphatase, ec:3.1.3.16 - phosphatase
scaffold11158	Aminoacyl-tRNA biosynthesis, Pentose and glucuronate interconversions	map00970, map00040	23, 20	ec:6.1.1.22 - ligase, ec:6.1.1.3 - ligase, ec:6.1.1.10 - ligase, ec:6.1.1.18 - ligase, ec:6.1.1.7 - ligase, ec:6.1.1.23 - ligase, ec:6.1.1.14 - ligase, ec:6.1.1.4 - ligase, ec:6.1.1.20 - ligase, ec:6.1.1.11 - ligase, ec:6.1.1.1 - ligase, ec:6.1.1.19 - ligase, ec:2.1.2.9 - formyltransferase, ec:6.1.1.9 - ligase, ec:6.1.1.15 - ligase, ec:6.1.1.5 - ligase, ec:6.1.1.21 - ligase, ec:6.1.1.12 - ligase,…
TR76560|c2_g1_i5	T cell receptor signaling pathway, Th1 and Th2 cell differentiation, PD-L1 expression and PD-1 checkpoint pathway in cancer	map04660, map04658, map05235	2, 1, 1	ec:2.7.10.2 - protein-tyrosine kinase, ec:3.1.3.16 - phosphatase, ec:3.1.3.16 - phosphatase, ec:3.1.3.16 - phosphatase
TR79213|c1_g8_i1	Thiamine metabolism, Purine metabolism	map00730, map00230	12, 60	ec:3.6.1.15 - phosphatase, ec:2.7.4.7 - kinase, ec:2.8.1.7 - desulfurase, ec:2.7.6.2 - diphosphokinase, ec:2.7.1.50 - kinase, ec:2.7.4.3 - kinase, ec:2.7.1.49 - kinase, ec:3.5.99.2 - aminohydrolase, ec:2.5.1.3 - phosphate synthase, ec:3.1.3.2 - phosphatase, ec:4.1.99.19 - synthase, ec:2.2.1.7 - synthase, ec:3.6.1.15 - phosphatase, ec:4.6.1.2 - cyclase, ec:3.2.2.7 - nucleosidase, ec:3.6.1.9 - diph…
TR76560|c2_g1_i4	T cell receptor signaling pathway, Th1 and Th2 cell differentiation, PD-L1 expression and PD-1 checkpoint pathway in cancer	map04660, map04658, map05235	2, 1, 1	ec:2.7.10.2 - protein-tyrosine kinase, ec:3.1.3.16 - phosphatase, ec:3.1.3.16 - phosphatase, ec:3.1.3.16 - phosphatase
TR56371|c0_g2_i1	Diterpenoid biosynthesis	map00904	11	ec:1.14.11.15 - 3beta-dioxygenase, ec:4.2.3.35 - synthase, ec:4.2.3.18 - synthase, ec:4.2.3.8 - synthase, ec:4.2.3.28 - synthase, ec:2.3.1.162 - O-acetyltransferase, ec:4.2.3.19 - synthase, ec:4.2.3.33 - synthase, ec:4.2.3.34 - synthase, ec:5.5.1.13 - diphosphate synthase, ec:2.3.1.167 - III 10-O-acetyltransferase
Mj_1_GCCAAT_L005_R1_001_(paired)_trimmed_(paired)_contig_105082	Alanine, aspartate and glutamate metabolism, beta-Alanine metabolism, Butanoate metabolism, Taurine and hypotaurine metabolism	map00250, map00410, map00650, map00430	29, 17, 19, 5	ec:1.4.1.14 - synthase (NADH), ec:4.1.1.15 - decarboxylase, ec:6.3.4.5 - synthase, ec:1.4.1.2 - dehydrogenase, ec:1.2.1.24 - dehydrogenase (NAD+), ec:6.3.1.2 - synthetase, ec:3.5.1.3 - alpha-keto acid-omega-amidase, ec:1.2.1.16 - dehydrogenase [NAD(P)+], ec:6.3.4.16 - synthase (ammonia), ec:6.3.5.5 - synthase (glutamine-hydrolysing), ec:2.6.1.1 - transaminase, ec:4.3.2.1 - lyase, ec:1.4.3.2 - oxi…
Mj_1_GCCAAT_L005_R1_001_(paired)_trimmed_(paired)_contig_4195	Alanine, aspartate and glutamate metabolism, Arginine biosynthesis	map00250, map00220	29, 21	ec:1.4.1.14 - synthase (NADH), ec:4.1.1.15 - decarboxylase, ec:6.3.4.5 - synthase, ec:1.4.1.2 - dehydrogenase, ec:1.2.1.24 - dehydrogenase (NAD+), ec:6.3.1.2 - synthetase, ec:3.5.1.3 - alpha-keto acid-omega-amidase, ec:1.2.1.16 - dehydrogenase [NAD(P)+], ec:6.3.4.16 - synthase (ammonia), ec:6.3.5.5 - synthase (glutamine-hydrolysing), ec:2.6.1.1 - transaminase, ec:4.3.2.1 - lyase, ec:1.4.3.2 - oxi…
Mj_1_GCCAAT_L005_R1_001_(paired)_trimmed_(paired)_contig_4199	Terpenoid backbone biosynthesis	map00900	27	ec:2.7.4.2 - kinase, ec:2.5.1.84 - diphosphate synthase [geranyl-diphosphate specific], ec:4.2.3.27 - synthase, ec:1.8.3.5 - oxidase, ec:2.5.1.58 - farnesyltransferase, ec:2.7.1.36 - kinase, ec:1.1.1.34 - reductase (NADPH), ec:2.1.1.100 - O-methyltransferase, ec:4.1.1.33 - decarboxylase, ec:2.5.1.30 - diphosphate synthase, ec:2.5.1.85 - diphosphate synthase [geranylgeranyl-diphosphate specific], …
TR76560|c2_g1_i1	T cell receptor signaling pathway, Th1 and Th2 cell differentiation, PD-L1 expression and PD-1 checkpoint pathway in cancer	map04660, map04658, map05235	2, 1, 1	ec:2.7.10.2 - protein-tyrosine kinase, ec:3.1.3.16 - phosphatase, ec:3.1.3.16 - phosphatase, ec:3.1.3.16 - phosphatase
Mj_1_GCCAAT_L005_R1_001_(paired)_trimmed_(paired)_contig_4196	Nitrogen metabolism	map00910	18	ec:3.5.1.49 - ec:3.5.1.49 formamidase, ec:1.4.1.14 - synthase (NADH), ec:1.7.7.1 - reductase, ec:3.5.5.1 - acetonitrilase, ec:4.2.1.1 - anhydrase, ec:1.4.1.2 - dehydrogenase, ec:4.2.1.104 - cyanate lyase, ec:6.3.1.2 - synthetase, ec:6.3.4.16 - synthase (ammonia), ec:1.7.7.2 - reductase, ec:1.4.1.3 - dehydrogenase [NAD(P)+], ec:1.4.7.1 - synthase (ferredoxin), ec:1.13.12.16 - monooxygenase, ec:1.7…
TR74725|c0_g1_i1	T cell receptor signaling pathway, Th1 and Th2 cell differentiation, PD-L1 expression and PD-1 checkpoint pathway in cancer	map04660, map04658, map05235	2, 1, 1	ec:2.7.10.2 - protein-tyrosine kinase, ec:3.1.3.16 - phosphatase, ec:3.1.3.16 - phosphatase, ec:3.1.3.16 - phosphatase
Mj_1_GCCAAT_L005_R1_001_(paired)_trimmed_(paired)_contig_4197	Thiamine metabolism, Riboflavin metabolism	map00730, map00740	12, 12	ec:3.6.1.15 - phosphatase, ec:2.7.4.7 - kinase, ec:2.8.1.7 - desulfurase, ec:2.7.6.2 - diphosphokinase, ec:2.7.1.50 - kinase, ec:2.7.4.3 - kinase, ec:2.7.1.49 - kinase, ec:3.5.99.2 - aminohydrolase, ec:2.5.1.3 - phosphate synthase, ec:3.1.3.2 - phosphatase, ec:4.1.99.19 - synthase, ec:2.2.1.7 - synthase, ec:3.6.1.9 - diphosphatase, ec:3.5.4.25 - cyclohydrolase II, ec:2.7.7.2 - synthase, ec:1.5.1.…
TR74674|c1_g1_i9	Steroid hormone biosynthesis, Drug metabolism - other enzymes, Retinol metabolism, Ascorbate and aldarate metabolism, Metabolism of xenobiotics by cytochrome P450, Pentose and glucuronate interconversions, Drug metabolism - cytochrome P450, Glycosaminoglycan biosynthesis - heparan sulfate / heparin, Glycosaminoglycan biosynthesis - chondroitin sulfate / dermatan sulfate, Porphyrin and chlorophyll…	map00140, map00983, map00830, map00053, map00980, map00040, map00982, map00534, map00532, map00860	12, 19, 6, 18, 8, 20, 7, 5, 3, 31	ec:1.1.1.51 - 17)beta-hydroxysteroid dehydrogenase, ec:1.14.14.1 - monooxygenase, ec:1.3.1.3 - 5beta-reductase, ec:2.1.1.6 - O-methyltransferase, ec:1.1.1.145 - dehydrogenase, ec:1.1.1.62 - 17-dehydrogenase, ec:2.4.1.17 - 1-naphthol glucuronyltransferase, ec:1.1.1.53 - 20beta)-hydroxysteroid dehydrogenase, ec:1.1.1.149 - dehydrogenase, ec:1.3.1.22 - 4-dehydrogenase (NADP+), ec:1.1.1.146 - dehydro…
TR12952|c0_g1_i1	Sulfur metabolism, Cysteine and methionine metabolism	map00920, map00270	16, 45	ec:1.8.1.2 - sulfite reductase (NADPH), ec:3.6.2.1 - adenosine 5-phosphosulfate sulfohydrolase, ec:1.8.4.9 - reductase (glutathione), ec:1.13.11.18 - dioxygenase, ec:2.3.1.30 - O-acetyltransferase, ec:1.8.7.1 - sulfite reductase (ferredoxin), ec:2.8.1.1 - sulfurtransferase, ec:1.8.99.2 - reductase, ec:2.7.7.4 - adenylyltransferase, ec:2.5.1.47 - synthase, ec:2.7.1.25 - kinase, ec:3.1.3.7 - nucleo…
Mj_1_GCCAAT_L005_R1_001_(paired)_trimmed_(paired)_contig_105063	Methane metabolism	map00680	23	ec:2.2.1.3 - transketolase, ec:4.4.1.22 - synthase, ec:4.2.1.11 - hydratase, ec:1.1.1.37 - dehydrogenase, ec:2.1.2.1 - hydroxymethyltransferase, ec:2.7.1.11 - phosphohexokinase, ec:2.6.1.45 - transaminase, ec:1.2.1.46 - dehydrogenase, ec:4.1.1.25 - decarboxylase, ec:3.1.3.11 - hexose diphosphatase, ec:1.1.3.13 - oxidase, ec:4.1.2.13 - aldolase, ec:1.1.1.29 - dehydrogenase, ec:6.2.1.1 - ligase, ec…
TR67337|c1_g1_i1	Starch and sucrose metabolism	map00500	35	ec:3.2.1.4 - endo-1,4-beta-D-glucanase, ec:3.2.1.26 - invertase, ec:3.6.1.9 - diphosphatase, ec:2.7.7.9 - uridylyltransferase, ec:2.4.1.15 - synthase (UDP-forming), ec:3.2.1.1 - glycogenase, ec:3.2.1.39 - endo-1,3-beta-D-glucosidase, ec:2.4.1.21 - synthase (glycosyl-transferring), ec:2.4.1.12 - synthase (UDP-forming), ec:2.7.1.4 - fructokinase (phosphorylating), ec:5.3.1.9 - isomerase, ec:2.4.1.3…
Mj_1_GCCAAT_L005_R1_001_(paired)_trimmed_(paired)_contig_106395	Aminoacyl-tRNA biosynthesis	map00970	23	ec:6.1.1.22 - ligase, ec:6.1.1.3 - ligase, ec:6.1.1.10 - ligase, ec:6.1.1.18 - ligase, ec:6.1.1.7 - ligase, ec:6.1.1.23 - ligase, ec:6.1.1.14 - ligase, ec:6.1.1.4 - ligase, ec:6.1.1.20 - ligase, ec:6.1.1.11 - ligase, ec:6.1.1.1 - ligase, ec:6.1.1.19 - ligase, ec:2.1.2.9 - formyltransferase, ec:6.1.1.9 - ligase, ec:6.1.1.15 - ligase, ec:6.1.1.5 - ligase, ec:6.1.1.21 - ligase, ec:6.1.1.12 - ligase,…
TR74592|c0_g3_i1	Monoterpenoid biosynthesis, Pantothenate and CoA biosynthesis	map00902, map00770	6, 19	ec:4.2.3.15 - synthase, ec:1.1.1.208 - dehydrogenase, ec:4.2.3.20 - synthase, ec:1.3.1.81 - reductase, ec:4.2.3.25 - synthase, ec:1.1.1.207 - dehydrogenase, ec:6.3.2.1 - ligase (AMP-forming), ec:3.5.2.2 - hydantoinase, ec:3.6.1.9 - diphosphatase, ec:1.3.1.2 - dehydrogenase (NADP+), ec:3.5.1.6 - N-carbamoyl-beta-alanine amidohydrolase, ec:4.2.1.9 - dehydratase, ec:6.3.2.5 - ligase (CTP), ec:1.1.1.…
Mj_1_GCCAAT_L005_R1_001_(paired)_trimmed_(paired)_contig_30720	Glyoxylate and dicarboxylate metabolism	map00630	34	ec:3.5.1.9 - kynurenine formamidase, ec:4.1.3.1 - lyase, ec:1.1.1.79 - reductase (NADP+), ec:2.7.1.31 - 3-kinase, ec:3.5.1.49 - ec:3.5.1.49 formamidase, ec:4.1.1.2 - decarboxylase, ec:1.1.1.60 - reductase, ec:3.1.3.18 - phosphatase, ec:1.1.1.37 - dehydrogenase, ec:1.1.99.14 - dehydrogenase, ec:2.1.2.1 - hydroxymethyltransferase, ec:1.1.1.81 - reductase, ec:6.3.1.2 - synthetase, ec:2.6.1.45 - tran…
TR74674|c1_g1_i8	Glycosaminoglycan biosynthesis - heparan sulfate / heparin, Glycosaminoglycan biosynthesis - chondroitin sulfate / dermatan sulfate	map00534, map00532	5, 3	ec:2.4.1.135 - 3-beta-glucuronosyltransferase, ec:2.4.1.223 - 4-alpha-N-acetylglucosaminyltransferase, ec:2.4.2.26 - xylosyltransferase, ec:2.4.1.224 - 4-alpha-N-acetylglucosaminyltransferase, ec:2.4.1.134 - 3-beta-galactosyltransferase, ec:2.4.1.135 - 3-beta-glucuronosyltransferase, ec:2.4.2.26 - xylosyltransferase, ec:2.4.1.134 - 3-beta-galactosyltransferase
scaffold12475	Glycerophospholipid metabolism	map00564	33	ec:3.1.4.4 - D, ec:3.1.1.52 - deacylase, ec:2.3.1.51 - O-acyltransferase, ec:2.7.8.5 - 1-phosphatidyltransferase, ec:2.1.1.17 - N-methyltransferase, ec:1.1.1.8 - dehydrogenase (NAD+), ec:2.7.8.1 - EPT, ec:2.1.1.103 - N-methyltransferase, ec:2.7.1.107 - kinase (ATP), ec:3.1.1.32 - A1, ec:3.6.1.16 - diphosphatase, ec:2.7.1.32 - kinase, ec:3.1.3.75 - phosphatase, ec:1.1.1.94 - dehydrogenase [NAD(P)+…
scaffold11143	Glycine, serine and threonine metabolism, Methane metabolism	map00260, map00680	39, 23	ec:2.3.1.37 - synthase, ec:2.7.1.31 - 3-kinase, ec:1.2.1.11 - dehydrogenase, ec:4.3.1.18 - ammonia-lyase, ec:4.1.2.5 - aldolase, ec:2.7.1.39 - kinase, ec:2.1.2.1 - hydroxymethyltransferase, ec:1.1.1.81 - reductase, ec:2.1.1.5 - S-methyltransferase, ec:2.6.1.45 - transaminase, ec:1.5.3.10 - oxidase, ec:2.1.2.10 - S-aminomethyldihydrolipoylprotein:(6S)-tetrahydrofolate aminomethyltransferase (ammon…
TR62287|c0_g1_i3	Phosphatidylinositol signaling system, Inositol phosphate metabolism	map04070, map00562	20, 25	ec:2.7.1.127 - 3-kinase, ec:2.7.1.158 - 2-kinase, ec:3.1.3.56 - 5-phosphatase, ec:2.7.1.107 - kinase (ATP), ec:2.7.1.137 - 3-kinase, ec:2.7.1.151 - multikinase, ec:3.1.4.11 - phospholipase C, ec:2.7.1.159 - 5/6-kinase, ec:3.1.3.36 - 5-phosphatase, ec:2.7.11.13 - kinase C, ec:3.1.3.57 - 1-phosphatase, ec:2.7.1.67 - 4-kinase, ec:2.7.8.11 - 3-phosphatidyltransferase, ec:2.7.7.41 - cytidylyltransfera…
TR62287|c0_g1_i1	Phosphatidylinositol signaling system, Inositol phosphate metabolism	map04070, map00562	20, 25	ec:2.7.1.127 - 3-kinase, ec:2.7.1.158 - 2-kinase, ec:3.1.3.56 - 5-phosphatase, ec:2.7.1.107 - kinase (ATP), ec:2.7.1.137 - 3-kinase, ec:2.7.1.151 - multikinase, ec:3.1.4.11 - phospholipase C, ec:2.7.1.159 - 5/6-kinase, ec:3.1.3.36 - 5-phosphatase, ec:2.7.11.13 - kinase C, ec:3.1.3.57 - 1-phosphatase, ec:2.7.1.67 - 4-kinase, ec:2.7.8.11 - 3-phosphatidyltransferase, ec:2.7.7.41 - cytidylyltransfera…
TR79039|c0_g6_i7	Purine metabolism, Sulfur metabolism, Monobactam biosynthesis, Selenocompound metabolism	map00230, map00920, map00261, map00450	60, 16, 5, 10	ec:3.6.1.15 - phosphatase, ec:4.6.1.2 - cyclase, ec:3.2.2.7 - nucleosidase, ec:3.6.1.9 - diphosphatase, ec:1.17.4.1 - reductase, ec:2.7.4.10 - kinase, ec:6.3.3.1 - cyclo-ligase, ec:1.7.3.3 - urate hydroxylase, ec:3.1.3.5 - uridine 5'-nucleotidase, ec:2.7.1.74 - kinase, ec:6.3.2.6 - synthase, ec:3.5.3.9 - deiminase, ec:3.2.2.1 - nucleosidase, ec:1.17.3.2 - oxidase, ec:2.7.4.3 - kinase, ec:3.5.2.17…
TR122819|c0_g1_i1	Folate biosynthesis, Glycerolipid metabolism, Galactose metabolism, Fructose and mannose metabolism, Pentose and glucuronate interconversions	map00790, map00561, map00052, map00051, map00040	17, 24, 20, 27, 20	ec:3.4.19.9 - gamma-glutamyl hydrolase, ec:2.5.1.15 - synthase, ec:1.1.1.21 - reductase, ec:6.3.2.12 - synthase, ec:2.10.1.1 - molybdotransferase, ec:4.2.1.96 - dehydratase, ec:3.5.4.25 - cyclohydrolase II, ec:3.5.4.16 - cyclohydrolase I, ec:6.3.2.17 - synthase, ec:2.7.6.3 - diphosphokinase, ec:2.6.1.85 - synthase, ec:1.1.1.184 - reductase (NADPH), ec:2.7.7.75 - adenylyltransferase, ec:4.1.2.25 -…
TR65072|c0_g1_i1	Biosynthesis of unsaturated fatty acids, Fatty acid elongation	map01040, map00062	6, 7	ec:1.3.3.6 - oxidase, ec:2.3.1.16 - C-acyltransferase, ec:3.1.2.2 - hydrolase, ec:1.14.19.1 - 9-desaturase, ec:1.14.19.2 - 9-desaturase, ec:2.3.1.176 - C-acyltransferase, ec:2.3.1.16 - C-acyltransferase, ec:3.1.2.2 - hydrolase, ec:1.3.1.38 - reductase (NADPH), ec:1.1.1.35 - dehydrogenase, ec:4.2.1.74 - hydratase, ec:4.2.1.17 - hydratase, ec:3.1.2.22 - hydrolase
TR65072|c0_g1_i2	Biosynthesis of unsaturated fatty acids, Fatty acid elongation	map01040, map00062	6, 7	ec:1.3.3.6 - oxidase, ec:2.3.1.16 - C-acyltransferase, ec:3.1.2.2 - hydrolase, ec:1.14.19.1 - 9-desaturase, ec:1.14.19.2 - 9-desaturase, ec:2.3.1.176 - C-acyltransferase, ec:2.3.1.16 - C-acyltransferase, ec:3.1.2.2 - hydrolase, ec:1.3.1.38 - reductase (NADPH), ec:1.1.1.35 - dehydrogenase, ec:4.2.1.74 - hydratase, ec:4.2.1.17 - hydratase, ec:3.1.2.22 - hydrolase
TR131376|c0_g1_i1	Oxidative phosphorylation	map00190	3	ec:3.6.1.1 - diphosphatase, ec:1.3.5.1 - dehydrogenase, ec:1.6.99.3 - dehydrogenase
TR74812|c0_g1_i6	Pyruvate metabolism, beta-Lactam resistance, Penicillin and cephalosporin biosynthesis, Glycerophospholipid metabolism	map00620, map01501, map00311, map00564	33, 1, 2, 33	ec:4.1.1.32 - carboxykinase (GTP), ec:1.2.1.3 - dehydrogenase (NAD+), ec:1.1.1.79 - reductase (NADP+), ec:4.1.1.49 - carboxykinase (ATP), ec:2.3.1.12 - acetyltransferase, ec:1.1.2.3 - dehydrogenase (cytochrome), ec:1.1.1.37 - dehydrogenase, ec:1.1.1.28 - dehydrogenase, ec:3.1.2.1 - hydrolase, ec:2.7.9.1 - phosphate dikinase, ec:6.4.1.2 - carboxylase, ec:1.1.2.4 - dehydrogenase (cytochrome), ec:3.…
TR58854|c0_g2_i6	Pentose and glucuronate interconversions	map00040	20	ec:2.7.1.17 - xylulokinase (phosphorylating), ec:5.1.3.1 - 3-epimerase, ec:5.3.1.5 - isomerase, ec:2.7.7.9 - uridylyltransferase, ec:1.1.1.21 - reductase, ec:3.2.1.31 - beta-glucuronide glucuronohydrolase glucuronidase, ec:1.1.1.12 - 4-dehydrogenase, ec:2.7.7.44 - uridylyltransferase, ec:1.1.1.22 - 6-dehydrogenase, ec:1.1.1.9 - reductase, ec:3.1.1.11 - pectin demethoxylase, ec:3.2.1.15 - pectin d…
TR58854|c0_g2_i3	Pentose and glucuronate interconversions	map00040	20	ec:2.7.1.17 - xylulokinase (phosphorylating), ec:5.1.3.1 - 3-epimerase, ec:5.3.1.5 - isomerase, ec:2.7.7.9 - uridylyltransferase, ec:1.1.1.21 - reductase, ec:3.2.1.31 - beta-glucuronide glucuronohydrolase glucuronidase, ec:1.1.1.12 - 4-dehydrogenase, ec:2.7.7.44 - uridylyltransferase, ec:1.1.1.22 - 6-dehydrogenase, ec:1.1.1.9 - reductase, ec:3.1.1.11 - pectin demethoxylase, ec:3.2.1.15 - pectin d…
TR74812|c0_g1_i2	Pyruvate metabolism, beta-Lactam resistance, Penicillin and cephalosporin biosynthesis, Glycerophospholipid metabolism	map00620, map01501, map00311, map00564	33, 1, 2, 33	ec:4.1.1.32 - carboxykinase (GTP), ec:1.2.1.3 - dehydrogenase (NAD+), ec:1.1.1.79 - reductase (NADP+), ec:4.1.1.49 - carboxykinase (ATP), ec:2.3.1.12 - acetyltransferase, ec:1.1.2.3 - dehydrogenase (cytochrome), ec:1.1.1.37 - dehydrogenase, ec:1.1.1.28 - dehydrogenase, ec:3.1.2.1 - hydrolase, ec:2.7.9.1 - phosphate dikinase, ec:6.4.1.2 - carboxylase, ec:1.1.2.4 - dehydrogenase (cytochrome), ec:3.…
TR58854|c0_g2_i4	Pentose and glucuronate interconversions	map00040	20	ec:2.7.1.17 - xylulokinase (phosphorylating), ec:5.1.3.1 - 3-epimerase, ec:5.3.1.5 - isomerase, ec:2.7.7.9 - uridylyltransferase, ec:1.1.1.21 - reductase, ec:3.2.1.31 - beta-glucuronide glucuronohydrolase glucuronidase, ec:1.1.1.12 - 4-dehydrogenase, ec:2.7.7.44 - uridylyltransferase, ec:1.1.1.22 - 6-dehydrogenase, ec:1.1.1.9 - reductase, ec:3.1.1.11 - pectin demethoxylase, ec:3.2.1.15 - pectin d…
TR79649|c0_g1_i2	Arachidonic acid metabolism, Glutathione metabolism	map00590, map00480	9, 19	ec:1.1.1.189 - 9-reductase, ec:3.3.2.10 - epoxide hydrolase, ec:1.14.14.1 - monooxygenase, ec:1.1.1.184 - reductase (NADPH), ec:5.3.99.2 - synthase, ec:3.3.2.6 - hydrolase, ec:1.11.1.9 - peroxidase, ec:1.14.99.1 - synthase, ec:3.1.1.4 - A2, ec:1.11.1.11 - peroxidase, ec:1.17.4.1 - reductase, ec:3.5.2.9 - (ATP-hydrolysing), ec:1.8.5.1 - dehydrogenase (ascorbate), ec:1.11.1.15 - to 1.11.1.24 and 1.…
C938834	Phosphatidylinositol signaling system, Inositol phosphate metabolism	map04070, map00562	20, 25	ec:2.7.1.127 - 3-kinase, ec:2.7.1.158 - 2-kinase, ec:3.1.3.56 - 5-phosphatase, ec:2.7.1.107 - kinase (ATP), ec:2.7.1.137 - 3-kinase, ec:2.7.1.151 - multikinase, ec:3.1.4.11 - phospholipase C, ec:2.7.1.159 - 5/6-kinase, ec:3.1.3.36 - 5-phosphatase, ec:2.7.11.13 - kinase C, ec:3.1.3.57 - 1-phosphatase, ec:2.7.1.67 - 4-kinase, ec:2.7.8.11 - 3-phosphatidyltransferase, ec:2.7.7.41 - cytidylyltransfera…
TR65689|c0_g2_i11	Drug metabolism - other enzymes	map00983	19	ec:2.7.1.48 - kinase, ec:3.5.2.2 - hydantoinase, ec:3.1.1.1 - ali-esterase, ec:1.17.4.1 - reductase, ec:1.3.1.2 - dehydrogenase (NADP+), ec:3.5.1.6 - N-carbamoyl-beta-alanine amidohydrolase, ec:3.2.1.31 - beta-glucuronide glucuronohydrolase glucuronidase, ec:3.5.4.5 - deaminase, ec:1.17.3.2 - oxidase, ec:2.7.4.14 - kinase, ec:1.1.1.205 - dehydrogenase, ec:2.4.2.10 - phosphoribosyltransferase, ec:…
TR79649|c0_g1_i5	Arachidonic acid metabolism, Glutathione metabolism	map00590, map00480	9, 19	ec:1.1.1.189 - 9-reductase, ec:3.3.2.10 - epoxide hydrolase, ec:1.14.14.1 - monooxygenase, ec:1.1.1.184 - reductase (NADPH), ec:5.3.99.2 - synthase, ec:3.3.2.6 - hydrolase, ec:1.11.1.9 - peroxidase, ec:1.14.99.1 - synthase, ec:3.1.1.4 - A2, ec:1.11.1.11 - peroxidase, ec:1.17.4.1 - reductase, ec:3.5.2.9 - (ATP-hydrolysing), ec:1.8.5.1 - dehydrogenase (ascorbate), ec:1.11.1.15 - to 1.11.1.24 and 1.…
Mj_1_GCCAAT_L005_R1_001_(paired)_trimmed_(paired)_contig_6715	Drug metabolism - other enzymes	map00983	19	ec:2.7.1.48 - kinase, ec:3.5.2.2 - hydantoinase, ec:3.1.1.1 - ali-esterase, ec:1.17.4.1 - reductase, ec:1.3.1.2 - dehydrogenase (NADP+), ec:3.5.1.6 - N-carbamoyl-beta-alanine amidohydrolase, ec:3.2.1.31 - beta-glucuronide glucuronohydrolase glucuronidase, ec:3.5.4.5 - deaminase, ec:1.17.3.2 - oxidase, ec:2.7.4.14 - kinase, ec:1.1.1.205 - dehydrogenase, ec:2.4.2.10 - phosphoribosyltransferase, ec:…
TR72659|c0_g1_i1	alpha-Linolenic acid metabolism	map00592	11	ec:4.2.1.92 - dehydratase, ec:1.3.3.6 - oxidase, ec:2.3.1.16 - C-acyltransferase, ec:3.1.1.32 - A1, ec:1.3.1.42 - reductase, ec:1.1.1.1 - dehydrogenase, ec:1.13.11.12 - 13S-lipoxygenase, ec:5.3.99.6 - cyclase, ec:4.2.1.17 - hydratase, ec:2.1.1.141 - O-methyltransferase, ec:3.1.1.4 - A2
TR65689|c0_g2_i19	Drug metabolism - other enzymes	map00983	19	ec:2.7.1.48 - kinase, ec:3.5.2.2 - hydantoinase, ec:3.1.1.1 - ali-esterase, ec:1.17.4.1 - reductase, ec:1.3.1.2 - dehydrogenase (NADP+), ec:3.5.1.6 - N-carbamoyl-beta-alanine amidohydrolase, ec:3.2.1.31 - beta-glucuronide glucuronohydrolase glucuronidase, ec:3.5.4.5 - deaminase, ec:1.17.3.2 - oxidase, ec:2.7.4.14 - kinase, ec:1.1.1.205 - dehydrogenase, ec:2.4.2.10 - phosphoribosyltransferase, ec:…
TR79039|c0_g6_i1	Purine metabolism, Sulfur metabolism, Monobactam biosynthesis, Selenocompound metabolism	map00230, map00920, map00261, map00450	60, 16, 5, 10	ec:3.6.1.15 - phosphatase, ec:4.6.1.2 - cyclase, ec:3.2.2.7 - nucleosidase, ec:3.6.1.9 - diphosphatase, ec:1.17.4.1 - reductase, ec:2.7.4.10 - kinase, ec:6.3.3.1 - cyclo-ligase, ec:1.7.3.3 - urate hydroxylase, ec:3.1.3.5 - uridine 5'-nucleotidase, ec:2.7.1.74 - kinase, ec:6.3.2.6 - synthase, ec:3.5.3.9 - deiminase, ec:3.2.2.1 - nucleosidase, ec:1.17.3.2 - oxidase, ec:2.7.4.3 - kinase, ec:3.5.2.17…
TR66240|c0_g1_i4	T cell receptor signaling pathway, Th1 and Th2 cell differentiation, PD-L1 expression and PD-1 checkpoint pathway in cancer	map04660, map04658, map05235	2, 1, 1	ec:2.7.10.2 - protein-tyrosine kinase, ec:3.1.3.16 - phosphatase, ec:3.1.3.16 - phosphatase, ec:3.1.3.16 - phosphatase
TR65689|c0_g2_i18	Drug metabolism - other enzymes	map00983	19	ec:2.7.1.48 - kinase, ec:3.5.2.2 - hydantoinase, ec:3.1.1.1 - ali-esterase, ec:1.17.4.1 - reductase, ec:1.3.1.2 - dehydrogenase (NADP+), ec:3.5.1.6 - N-carbamoyl-beta-alanine amidohydrolase, ec:3.2.1.31 - beta-glucuronide glucuronohydrolase glucuronidase, ec:3.5.4.5 - deaminase, ec:1.17.3.2 - oxidase, ec:2.7.4.14 - kinase, ec:1.1.1.205 - dehydrogenase, ec:2.4.2.10 - phosphoribosyltransferase, ec:…
TR65689|c0_g2_i17	Drug metabolism - other enzymes	map00983	19	ec:2.7.1.48 - kinase, ec:3.5.2.2 - hydantoinase, ec:3.1.1.1 - ali-esterase, ec:1.17.4.1 - reductase, ec:1.3.1.2 - dehydrogenase (NADP+), ec:3.5.1.6 - N-carbamoyl-beta-alanine amidohydrolase, ec:3.2.1.31 - beta-glucuronide glucuronohydrolase glucuronidase, ec:3.5.4.5 - deaminase, ec:1.17.3.2 - oxidase, ec:2.7.4.14 - kinase, ec:1.1.1.205 - dehydrogenase, ec:2.4.2.10 - phosphoribosyltransferase, ec:…
TR65689|c0_g2_i16	Drug metabolism - other enzymes	map00983	19	ec:2.7.1.48 - kinase, ec:3.5.2.2 - hydantoinase, ec:3.1.1.1 - ali-esterase, ec:1.17.4.1 - reductase, ec:1.3.1.2 - dehydrogenase (NADP+), ec:3.5.1.6 - N-carbamoyl-beta-alanine amidohydrolase, ec:3.2.1.31 - beta-glucuronide glucuronohydrolase glucuronidase, ec:3.5.4.5 - deaminase, ec:1.17.3.2 - oxidase, ec:2.7.4.14 - kinase, ec:1.1.1.205 - dehydrogenase, ec:2.4.2.10 - phosphoribosyltransferase, ec:…
TR65689|c0_g2_i15	Drug metabolism - other enzymes	map00983	19	ec:2.7.1.48 - kinase, ec:3.5.2.2 - hydantoinase, ec:3.1.1.1 - ali-esterase, ec:1.17.4.1 - reductase, ec:1.3.1.2 - dehydrogenase (NADP+), ec:3.5.1.6 - N-carbamoyl-beta-alanine amidohydrolase, ec:3.2.1.31 - beta-glucuronide glucuronohydrolase glucuronidase, ec:3.5.4.5 - deaminase, ec:1.17.3.2 - oxidase, ec:2.7.4.14 - kinase, ec:1.1.1.205 - dehydrogenase, ec:2.4.2.10 - phosphoribosyltransferase, ec:…
TR65689|c0_g2_i14	Drug metabolism - other enzymes	map00983	19	ec:2.7.1.48 - kinase, ec:3.5.2.2 - hydantoinase, ec:3.1.1.1 - ali-esterase, ec:1.17.4.1 - reductase, ec:1.3.1.2 - dehydrogenase (NADP+), ec:3.5.1.6 - N-carbamoyl-beta-alanine amidohydrolase, ec:3.2.1.31 - beta-glucuronide glucuronohydrolase glucuronidase, ec:3.5.4.5 - deaminase, ec:1.17.3.2 - oxidase, ec:2.7.4.14 - kinase, ec:1.1.1.205 - dehydrogenase, ec:2.4.2.10 - phosphoribosyltransferase, ec:…
TR65701|c0_g1_i2	Drug metabolism - other enzymes, Metabolism of xenobiotics by cytochrome P450, Glutathione metabolism, Drug metabolism - cytochrome P450, Phenylpropanoid biosynthesis	map00983, map00980, map00480, map00982, map00940	19, 8, 19, 7, 17	ec:2.7.1.48 - kinase, ec:3.5.2.2 - hydantoinase, ec:3.1.1.1 - ali-esterase, ec:1.17.4.1 - reductase, ec:1.3.1.2 - dehydrogenase (NADP+), ec:3.5.1.6 - N-carbamoyl-beta-alanine amidohydrolase, ec:3.2.1.31 - beta-glucuronide glucuronohydrolase glucuronidase, ec:3.5.4.5 - deaminase, ec:1.17.3.2 - oxidase, ec:2.7.4.14 - kinase, ec:1.1.1.205 - dehydrogenase, ec:2.4.2.10 - phosphoribosyltransferase, ec:…
Mj_1_GCCAAT_L005_R1_001_(paired)_trimmed_(paired)_contig_42721	Glycerolipid metabolism, Cutin, suberine and wax biosynthesis	map00561, map00073	24, 4	ec:2.3.1.20 - O-acyltransferase, ec:1.2.1.3 - dehydrogenase (NAD+), ec:2.7.1.31 - 3-kinase, ec:2.3.1.51 - O-acyltransferase, ec:2.7.7.9 - uridylyltransferase, ec:1.1.1.21 - reductase, ec:2.4.1.46 - synthase, ec:3.2.1.22 - melibiase, ec:2.7.1.107 - kinase (ATP), ec:3.1.1.23 - lipase, ec:2.3.1.22 - O-acyltransferase, ec:2.4.1.241 - synthase, ec:3.13.1.1 - synthase, ec:2.4.1.184 - galactosyltransfer…
TR65701|c0_g1_i3	Drug metabolism - other enzymes, Metabolism of xenobiotics by cytochrome P450, Glutathione metabolism, Drug metabolism - cytochrome P450, Phenylpropanoid biosynthesis	map00983, map00980, map00480, map00982, map00940	19, 8, 19, 7, 17	ec:2.7.1.48 - kinase, ec:3.5.2.2 - hydantoinase, ec:3.1.1.1 - ali-esterase, ec:1.17.4.1 - reductase, ec:1.3.1.2 - dehydrogenase (NADP+), ec:3.5.1.6 - N-carbamoyl-beta-alanine amidohydrolase, ec:3.2.1.31 - beta-glucuronide glucuronohydrolase glucuronidase, ec:3.5.4.5 - deaminase, ec:1.17.3.2 - oxidase, ec:2.7.4.14 - kinase, ec:1.1.1.205 - dehydrogenase, ec:2.4.2.10 - phosphoribosyltransferase, ec:…
TR38831|c0_g1_i1	Steroid hormone biosynthesis, Linoleic acid metabolism, Retinol metabolism, Fatty acid degradation, Arachidonic acid metabolism, Caffeine metabolism, Metabolism of xenobiotics by cytochrome P450, Drug metabolism - cytochrome P450, Aminobenzoate degradation, Tryptophan metabolism	map00140, map00591, map00830, map00071, map00590, map00232, map00980, map00982, map00627, map00380	12, 3, 6, 14, 9, 3, 8, 7, 11, 29	ec:1.1.1.51 - 17)beta-hydroxysteroid dehydrogenase, ec:1.14.14.1 - monooxygenase, ec:1.3.1.3 - 5beta-reductase, ec:2.1.1.6 - O-methyltransferase, ec:1.1.1.145 - dehydrogenase, ec:1.1.1.62 - 17-dehydrogenase, ec:2.4.1.17 - 1-naphthol glucuronyltransferase, ec:1.1.1.53 - 20beta)-hydroxysteroid dehydrogenase, ec:1.1.1.149 - dehydrogenase, ec:1.3.1.22 - 4-dehydrogenase (NADP+), ec:1.1.1.146 - dehydro…
TR67197|c1_g1_i1	Ubiquinone and other terpenoid-quinone biosynthesis	map00130	14	ec:2.5.1.39 - polyprenyltransferase, ec:1.1.1.237 - reductase, ec:1.6.5.2 - dehydrogenase (quinone), ec:2.1.1.64 - 3-O-methyltransferase, ec:2.1.1.95 - C-methyltransferase, ec:4.1.3.36 - synthase, ec:1.13.11.27 - dioxygenase, ec:2.6.1.5 - transaminase, ec:4.2.99.20 - synthase, ec:6.2.1.26 - ligase, ec:2.2.1.9 - synthase, ec:2.1.1.114 - methyltransferase, ec:5.4.4.2 - synthase, ec:6.2.1.12 - ligase
TR76950|c1_g1_i14	Diterpenoid biosynthesis	map00904	11	ec:1.14.11.15 - 3beta-dioxygenase, ec:4.2.3.35 - synthase, ec:4.2.3.18 - synthase, ec:4.2.3.8 - synthase, ec:4.2.3.28 - synthase, ec:2.3.1.162 - O-acetyltransferase, ec:4.2.3.19 - synthase, ec:4.2.3.33 - synthase, ec:4.2.3.34 - synthase, ec:5.5.1.13 - diphosphate synthase, ec:2.3.1.167 - III 10-O-acetyltransferase
TR27923|c1_g1_i1	Carbon fixation in photosynthetic organisms, Glyoxylate and dicarboxylate metabolism	map00710, map00630	22, 34	ec:5.1.3.1 - 3-epimerase, ec:4.1.1.49 - carboxykinase (ATP), ec:2.7.2.3 - kinase, ec:1.1.1.37 - dehydrogenase, ec:5.3.1.1 - isomerase, ec:2.7.9.1 - phosphate dikinase, ec:2.6.1.1 - transaminase, ec:1.2.1.12 - dehydrogenase (phosphorylating), ec:3.1.3.11 - hexose diphosphatase, ec:5.3.1.6 - isomerase, ec:2.2.1.1 - glycolaldehydetransferase, ec:4.1.2.13 - aldolase, ec:1.1.1.82 - dehydrogenase (NADP…
Mj_1_GCCAAT_L005_R1_001_(paired)_trimmed_(paired)_contig_6701	Cyanoamino acid metabolism, Starch and sucrose metabolism, Phenylpropanoid biosynthesis	map00460, map00500, map00940	13, 35, 17	ec:3.5.1.49 - ec:3.5.1.49 formamidase, ec:3.5.5.1 - acetonitrilase, ec:3.2.1.118 - beta-glucosidase, ec:2.1.2.1 - hydroxymethyltransferase, ec:4.4.1.9 - synthase, ec:3.2.1.117 - beta-glucosidase, ec:4.2.1.65 - hydratase, ec:3.2.1.21 - gentiobiase, ec:4.1.2.10 - lyase, ec:2.3.2.2 - glutamyl transpeptidase, ec:6.3.1.1 - ligase, ec:3.5.1.1 - asparaginase II, ec:3.5.5.4 - nitrilase, ec:3.2.1.4 - endo…
TR69855|c0_g1_i3	Aminoacyl-tRNA biosynthesis	map00970	23	ec:6.1.1.22 - ligase, ec:6.1.1.3 - ligase, ec:6.1.1.10 - ligase, ec:6.1.1.18 - ligase, ec:6.1.1.7 - ligase, ec:6.1.1.23 - ligase, ec:6.1.1.14 - ligase, ec:6.1.1.4 - ligase, ec:6.1.1.20 - ligase, ec:6.1.1.11 - ligase, ec:6.1.1.1 - ligase, ec:6.1.1.19 - ligase, ec:2.1.2.9 - formyltransferase, ec:6.1.1.9 - ligase, ec:6.1.1.15 - ligase, ec:6.1.1.5 - ligase, ec:6.1.1.21 - ligase, ec:6.1.1.12 - ligase,…
TR77206|c2_g1_i1	Vitamin B6 metabolism	map00750	8	ec:1.4.3.5 - 5'-phosphate synthase, ec:4.2.3.1 - synthase, ec:1.1.1.65 - 4-dehydrogenase, ec:1.2.3.1 - oxidase, ec:1.1.1.107 - 4-dehydrogenase, ec:2.7.1.35 - kinase, ec:4.3.3.6 - 5'-phosphate synthase (glutamine hydrolysing), ec:2.6.1.52 - transaminase
TR65701|c0_g1_i5	Drug metabolism - other enzymes, Metabolism of xenobiotics by cytochrome P450, Glutathione metabolism, Drug metabolism - cytochrome P450, Phenylpropanoid biosynthesis	map00983, map00980, map00480, map00982, map00940	19, 8, 19, 7, 17	ec:2.7.1.48 - kinase, ec:3.5.2.2 - hydantoinase, ec:3.1.1.1 - ali-esterase, ec:1.17.4.1 - reductase, ec:1.3.1.2 - dehydrogenase (NADP+), ec:3.5.1.6 - N-carbamoyl-beta-alanine amidohydrolase, ec:3.2.1.31 - beta-glucuronide glucuronohydrolase glucuronidase, ec:3.5.4.5 - deaminase, ec:1.17.3.2 - oxidase, ec:2.7.4.14 - kinase, ec:1.1.1.205 - dehydrogenase, ec:2.4.2.10 - phosphoribosyltransferase, ec:…
TR112031|c0_g1_i1	Other glycan degradation	map00511	8	ec:3.2.1.23 - lactase (ambiguous), ec:3.5.1.26 - aspartylglucosylamine deaspartylase, ec:3.2.1.96 - endo-beta-N-acetylglucosaminidase, ec:3.2.1.24 - alpha-D-mannosidase, ec:3.2.1.45 - psychosine hydrolase, ec:3.2.1.51 - alpha-fucosidase, ec:3.2.1.25 - mannanase, ec:3.2.1.52 - hexosaminidase
TR129489|c0_g1_i1	T cell receptor signaling pathway, Th1 and Th2 cell differentiation, PD-L1 expression and PD-1 checkpoint pathway in cancer	map04660, map04658, map05235	2, 1, 1	ec:2.7.10.2 - protein-tyrosine kinase, ec:3.1.3.16 - phosphatase, ec:3.1.3.16 - phosphatase, ec:3.1.3.16 - phosphatase
C901527	Drug metabolism - cytochrome P450	map00982	7	ec:1.14.14.1 - monooxygenase, ec:1.1.1.1 - dehydrogenase, ec:1.2.1.5 - dehydrogenase [NAD(P)+], ec:1.2.3.1 - oxidase, ec:2.4.1.17 - 1-naphthol glucuronyltransferase, ec:1.14.13.8 - monooxygenase, ec:2.5.1.18 - transferase
C782637	Carbon fixation in photosynthetic organisms, Pyruvate metabolism, Glycolysis / Gluconeogenesis, Citrate cycle (TCA cycle)	map00710, map00620, map00010, map00020	22, 33, 28, 18	ec:5.1.3.1 - 3-epimerase, ec:4.1.1.49 - carboxykinase (ATP), ec:2.7.2.3 - kinase, ec:1.1.1.37 - dehydrogenase, ec:5.3.1.1 - isomerase, ec:2.7.9.1 - phosphate dikinase, ec:2.6.1.1 - transaminase, ec:1.2.1.12 - dehydrogenase (phosphorylating), ec:3.1.3.11 - hexose diphosphatase, ec:5.3.1.6 - isomerase, ec:2.2.1.1 - glycolaldehydetransferase, ec:4.1.2.13 - aldolase, ec:1.1.1.82 - dehydrogenase (NADP…
TR69717|c3_g1_i2	Sulfur metabolism	map00920	16	ec:1.8.1.2 - sulfite reductase (NADPH), ec:3.6.2.1 - adenosine 5-phosphosulfate sulfohydrolase, ec:1.8.4.9 - reductase (glutathione), ec:1.13.11.18 - dioxygenase, ec:2.3.1.30 - O-acetyltransferase, ec:1.8.7.1 - sulfite reductase (ferredoxin), ec:2.8.1.1 - sulfurtransferase, ec:1.8.99.2 - reductase, ec:2.7.7.4 - adenylyltransferase, ec:2.5.1.47 - synthase, ec:2.7.1.25 - kinase, ec:3.1.3.7 - nucleo…
TR69717|c3_g1_i1	Sulfur metabolism	map00920	16	ec:1.8.1.2 - sulfite reductase (NADPH), ec:3.6.2.1 - adenosine 5-phosphosulfate sulfohydrolase, ec:1.8.4.9 - reductase (glutathione), ec:1.13.11.18 - dioxygenase, ec:2.3.1.30 - O-acetyltransferase, ec:1.8.7.1 - sulfite reductase (ferredoxin), ec:2.8.1.1 - sulfurtransferase, ec:1.8.99.2 - reductase, ec:2.7.7.4 - adenylyltransferase, ec:2.5.1.47 - synthase, ec:2.7.1.25 - kinase, ec:3.1.3.7 - nucleo…
TR57771|c1_g3_i1	Phenylalanine metabolism, Tyrosine metabolism, Starch and sucrose metabolism	map00360, map00350, map00500	22, 26, 35	ec:5.3.2.1 - tautomerase, ec:1.1.1.237 - reductase, ec:2.6.1.57 - transaminase, ec:1.13.11.27 - dioxygenase, ec:1.1.1.90 - dehydrogenase, ec:2.6.1.5 - transaminase, ec:4.1.1.28 - decarboxylase, ec:2.6.1.1 - transaminase, ec:2.6.1.9 - transaminase, ec:1.4.3.2 - oxidase, ec:2.6.1.58 - transaminase, ec:1.1.1.157 - dehydrogenase, ec:4.3.1.24 - ammonia-lyase, ec:3.5.1.4 - acylamidase, ec:2.6.1.21 - tr…
C876241	Purine metabolism	map00230	60	ec:3.6.1.15 - phosphatase, ec:4.6.1.2 - cyclase, ec:3.2.2.7 - nucleosidase, ec:3.6.1.9 - diphosphatase, ec:1.17.4.1 - reductase, ec:2.7.4.10 - kinase, ec:6.3.3.1 - cyclo-ligase, ec:1.7.3.3 - urate hydroxylase, ec:3.1.3.5 - uridine 5'-nucleotidase, ec:2.7.1.74 - kinase, ec:6.3.2.6 - synthase, ec:3.5.3.9 - deiminase, ec:3.2.2.1 - nucleosidase, ec:1.17.3.2 - oxidase, ec:2.7.4.3 - kinase, ec:3.5.2.17…
TR76897|c0_g3_i4	Histidine metabolism	map00340	13	ec:1.2.1.3 - dehydrogenase (NAD+), ec:2.1.1.8 - N-methyltransferase, ec:4.2.1.19 - dehydratase, ec:3.5.4.19 - cyclohydrolase, ec:5.3.1.16 - isomerase, ec:2.6.1.9 - transaminase, ec:3.1.3.15 - histidinol phosphate phosphatase, ec:1.2.1.5 - dehydrogenase [NAD(P)+], ec:3.6.1.31 - diphosphatase, ec:2.4.2.17 - phosphoribosyltransferase, ec:1.1.1.23 - dehydrogenase, ec:4.1.1.22 - decarboxylase, ec:1.4.…
Mj_1_GCCAAT_L005_R1_001_(paired)_trimmed_(paired)_contig_28192	Glycine, serine and threonine metabolism	map00260	39	ec:2.3.1.37 - synthase, ec:2.7.1.31 - 3-kinase, ec:1.2.1.11 - dehydrogenase, ec:4.3.1.18 - ammonia-lyase, ec:4.1.2.5 - aldolase, ec:2.7.1.39 - kinase, ec:2.1.2.1 - hydroxymethyltransferase, ec:1.1.1.81 - reductase, ec:2.1.1.5 - S-methyltransferase, ec:2.6.1.45 - transaminase, ec:1.5.3.10 - oxidase, ec:2.1.2.10 - S-aminomethyldihydrolipoylprotein:(6S)-tetrahydrofolate aminomethyltransferase (ammon…
TR76897|c0_g3_i3	Histidine metabolism	map00340	13	ec:1.2.1.3 - dehydrogenase (NAD+), ec:2.1.1.8 - N-methyltransferase, ec:4.2.1.19 - dehydratase, ec:3.5.4.19 - cyclohydrolase, ec:5.3.1.16 - isomerase, ec:2.6.1.9 - transaminase, ec:3.1.3.15 - histidinol phosphate phosphatase, ec:1.2.1.5 - dehydrogenase [NAD(P)+], ec:3.6.1.31 - diphosphatase, ec:2.4.2.17 - phosphoribosyltransferase, ec:1.1.1.23 - dehydrogenase, ec:4.1.1.22 - decarboxylase, ec:1.4.…
TR76897|c0_g3_i2	Histidine metabolism	map00340	13	ec:1.2.1.3 - dehydrogenase (NAD+), ec:2.1.1.8 - N-methyltransferase, ec:4.2.1.19 - dehydratase, ec:3.5.4.19 - cyclohydrolase, ec:5.3.1.16 - isomerase, ec:2.6.1.9 - transaminase, ec:3.1.3.15 - histidinol phosphate phosphatase, ec:1.2.1.5 - dehydrogenase [NAD(P)+], ec:3.6.1.31 - diphosphatase, ec:2.4.2.17 - phosphoribosyltransferase, ec:1.1.1.23 - dehydrogenase, ec:4.1.1.22 - decarboxylase, ec:1.4.…
TR76897|c0_g3_i1	Histidine metabolism	map00340	13	ec:1.2.1.3 - dehydrogenase (NAD+), ec:2.1.1.8 - N-methyltransferase, ec:4.2.1.19 - dehydratase, ec:3.5.4.19 - cyclohydrolase, ec:5.3.1.16 - isomerase, ec:2.6.1.9 - transaminase, ec:3.1.3.15 - histidinol phosphate phosphatase, ec:1.2.1.5 - dehydrogenase [NAD(P)+], ec:3.6.1.31 - diphosphatase, ec:2.4.2.17 - phosphoribosyltransferase, ec:1.1.1.23 - dehydrogenase, ec:4.1.1.22 - decarboxylase, ec:1.4.…
Mj_1_GCCAAT_L005_R1_001_(paired)_trimmed_(paired)_contig_6733	Phosphatidylinositol signaling system	map04070	20	ec:2.7.1.127 - 3-kinase, ec:2.7.1.158 - 2-kinase, ec:3.1.3.56 - 5-phosphatase, ec:2.7.1.107 - kinase (ATP), ec:2.7.1.137 - 3-kinase, ec:2.7.1.151 - multikinase, ec:3.1.4.11 - phospholipase C, ec:2.7.1.159 - 5/6-kinase, ec:3.1.3.36 - 5-phosphatase, ec:2.7.11.13 - kinase C, ec:3.1.3.57 - 1-phosphatase, ec:2.7.1.67 - 4-kinase, ec:2.7.8.11 - 3-phosphatidyltransferase, ec:2.7.7.41 - cytidylyltransfera…
Mj_1_GCCAAT_L005_R1_001_(paired)_trimmed_(paired)_contig_5401	Thiamine metabolism	map00730	12	ec:3.6.1.15 - phosphatase, ec:2.7.4.7 - kinase, ec:2.8.1.7 - desulfurase, ec:2.7.6.2 - diphosphokinase, ec:2.7.1.50 - kinase, ec:2.7.4.3 - kinase, ec:2.7.1.49 - kinase, ec:3.5.99.2 - aminohydrolase, ec:2.5.1.3 - phosphate synthase, ec:3.1.3.2 - phosphatase, ec:4.1.99.19 - synthase, ec:2.2.1.7 - synthase
TR62594|c0_g1_i6	Aminobenzoate degradation	map00627	11	ec:1.2.1.28 - dehydrogenase (NAD+), ec:3.5.5.1 - acetonitrilase, ec:1.6.5.7 - reductase, ec:1.14.14.1 - monooxygenase, ec:4.2.1.84 - hydratase, ec:3.1.3.41 - nitrophenyl phosphatase, ec:3.6.1.7 - acetylphosphatase, ec:3.5.1.4 - acylamidase, ec:1.14.13.82 - monooxygenase, ec:2.8.3.8 - CoA-transferase, ec:4.2.1.17 - hydratase
TR78955|c2_g1_i5	Nicotinate and nicotinamide metabolism	map00760	17	ec:2.7.7.1 - adenylyltransferase, ec:3.6.1.9 - diphosphatase, ec:2.7.1.23 - kinase, ec:3.1.3.5 - uridine 5'-nucleotidase, ec:1.2.1.24 - dehydrogenase (NAD+), ec:1.2.1.16 - dehydrogenase [NAD(P)+], ec:3.2.2.1 - nucleosidase, ec:2.4.2.19 - diphosphorylase (carboxylating), ec:1.6.1.1 - transhydrogenase (Si-specific), ec:6.3.5.1 - synthase (glutamine-hydrolysing), ec:2.7.7.18 - adenylyltransferase, e…
TR62594|c0_g1_i4	Aminobenzoate degradation	map00627	11	ec:1.2.1.28 - dehydrogenase (NAD+), ec:3.5.5.1 - acetonitrilase, ec:1.6.5.7 - reductase, ec:1.14.14.1 - monooxygenase, ec:4.2.1.84 - hydratase, ec:3.1.3.41 - nitrophenyl phosphatase, ec:3.6.1.7 - acetylphosphatase, ec:3.5.1.4 - acylamidase, ec:1.14.13.82 - monooxygenase, ec:2.8.3.8 - CoA-transferase, ec:4.2.1.17 - hydratase
TR62594|c0_g1_i3	Aminobenzoate degradation	map00627	11	ec:1.2.1.28 - dehydrogenase (NAD+), ec:3.5.5.1 - acetonitrilase, ec:1.6.5.7 - reductase, ec:1.14.14.1 - monooxygenase, ec:4.2.1.84 - hydratase, ec:3.1.3.41 - nitrophenyl phosphatase, ec:3.6.1.7 - acetylphosphatase, ec:3.5.1.4 - acylamidase, ec:1.14.13.82 - monooxygenase, ec:2.8.3.8 - CoA-transferase, ec:4.2.1.17 - hydratase
TR78955|c2_g1_i7	Nicotinate and nicotinamide metabolism	map00760	17	ec:2.7.7.1 - adenylyltransferase, ec:3.6.1.9 - diphosphatase, ec:2.7.1.23 - kinase, ec:3.1.3.5 - uridine 5'-nucleotidase, ec:1.2.1.24 - dehydrogenase (NAD+), ec:1.2.1.16 - dehydrogenase [NAD(P)+], ec:3.2.2.1 - nucleosidase, ec:2.4.2.19 - diphosphorylase (carboxylating), ec:1.6.1.1 - transhydrogenase (Si-specific), ec:6.3.5.1 - synthase (glutamine-hydrolysing), ec:2.7.7.18 - adenylyltransferase, e…
TR78955|c2_g1_i6	Nicotinate and nicotinamide metabolism	map00760	17	ec:2.7.7.1 - adenylyltransferase, ec:3.6.1.9 - diphosphatase, ec:2.7.1.23 - kinase, ec:3.1.3.5 - uridine 5'-nucleotidase, ec:1.2.1.24 - dehydrogenase (NAD+), ec:1.2.1.16 - dehydrogenase [NAD(P)+], ec:3.2.2.1 - nucleosidase, ec:2.4.2.19 - diphosphorylase (carboxylating), ec:1.6.1.1 - transhydrogenase (Si-specific), ec:6.3.5.1 - synthase (glutamine-hydrolysing), ec:2.7.7.18 - adenylyltransferase, e…
TR69717|c3_g1_i3	Sulfur metabolism	map00920	16	ec:1.8.1.2 - sulfite reductase (NADPH), ec:3.6.2.1 - adenosine 5-phosphosulfate sulfohydrolase, ec:1.8.4.9 - reductase (glutathione), ec:1.13.11.18 - dioxygenase, ec:2.3.1.30 - O-acetyltransferase, ec:1.8.7.1 - sulfite reductase (ferredoxin), ec:2.8.1.1 - sulfurtransferase, ec:1.8.99.2 - reductase, ec:2.7.7.4 - adenylyltransferase, ec:2.5.1.47 - synthase, ec:2.7.1.25 - kinase, ec:3.1.3.7 - nucleo…
Mj_1_GCCAAT_L005_R1_001_(paired)_trimmed_(paired)_contig_41407	alpha-Linolenic acid metabolism, Propanoate metabolism, Fatty acid degradation, beta-Alanine metabolism, Biosynthesis of unsaturated fatty acids	map00592, map00640, map00071, map00410, map01040	11, 21, 14, 17, 6	ec:4.2.1.92 - dehydratase, ec:1.3.3.6 - oxidase, ec:2.3.1.16 - C-acyltransferase, ec:3.1.1.32 - A1, ec:1.3.1.42 - reductase, ec:1.1.1.1 - dehydrogenase, ec:1.13.11.12 - 13S-lipoxygenase, ec:5.3.99.6 - cyclase, ec:4.2.1.17 - hydratase, ec:2.1.1.141 - O-methyltransferase, ec:3.1.1.4 - A2, ec:4.1.1.9 - decarboxylase, ec:2.3.1.168 - (2-methylpropanoyl)transferase, ec:1.3.3.6 - oxidase, ec:4.2.1.79 - …
TR62594|c0_g1_i9	Aminobenzoate degradation	map00627	11	ec:1.2.1.28 - dehydrogenase (NAD+), ec:3.5.5.1 - acetonitrilase, ec:1.6.5.7 - reductase, ec:1.14.14.1 - monooxygenase, ec:4.2.1.84 - hydratase, ec:3.1.3.41 - nitrophenyl phosphatase, ec:3.6.1.7 - acetylphosphatase, ec:3.5.1.4 - acylamidase, ec:1.14.13.82 - monooxygenase, ec:2.8.3.8 - CoA-transferase, ec:4.2.1.17 - hydratase
TR62594|c0_g1_i8	Aminobenzoate degradation	map00627	11	ec:1.2.1.28 - dehydrogenase (NAD+), ec:3.5.5.1 - acetonitrilase, ec:1.6.5.7 - reductase, ec:1.14.14.1 - monooxygenase, ec:4.2.1.84 - hydratase, ec:3.1.3.41 - nitrophenyl phosphatase, ec:3.6.1.7 - acetylphosphatase, ec:3.5.1.4 - acylamidase, ec:1.14.13.82 - monooxygenase, ec:2.8.3.8 - CoA-transferase, ec:4.2.1.17 - hydratase
TR32578|c0_g1_i2	Drug metabolism - other enzymes	map00983	19	ec:2.7.1.48 - kinase, ec:3.5.2.2 - hydantoinase, ec:3.1.1.1 - ali-esterase, ec:1.17.4.1 - reductase, ec:1.3.1.2 - dehydrogenase (NADP+), ec:3.5.1.6 - N-carbamoyl-beta-alanine amidohydrolase, ec:3.2.1.31 - beta-glucuronide glucuronohydrolase glucuronidase, ec:3.5.4.5 - deaminase, ec:1.17.3.2 - oxidase, ec:2.7.4.14 - kinase, ec:1.1.1.205 - dehydrogenase, ec:2.4.2.10 - phosphoribosyltransferase, ec:…
TR68503|c0_g1_i1	Sulfur metabolism	map00920	16	ec:1.8.1.2 - sulfite reductase (NADPH), ec:3.6.2.1 - adenosine 5-phosphosulfate sulfohydrolase, ec:1.8.4.9 - reductase (glutathione), ec:1.13.11.18 - dioxygenase, ec:2.3.1.30 - O-acetyltransferase, ec:1.8.7.1 - sulfite reductase (ferredoxin), ec:2.8.1.1 - sulfurtransferase, ec:1.8.99.2 - reductase, ec:2.7.7.4 - adenylyltransferase, ec:2.5.1.47 - synthase, ec:2.7.1.25 - kinase, ec:3.1.3.7 - nucleo…
TR81353|c0_g1_i1	Purine metabolism	map00230	60	ec:3.6.1.15 - phosphatase, ec:4.6.1.2 - cyclase, ec:3.2.2.7 - nucleosidase, ec:3.6.1.9 - diphosphatase, ec:1.17.4.1 - reductase, ec:2.7.4.10 - kinase, ec:6.3.3.1 - cyclo-ligase, ec:1.7.3.3 - urate hydroxylase, ec:3.1.3.5 - uridine 5'-nucleotidase, ec:2.7.1.74 - kinase, ec:6.3.2.6 - synthase, ec:3.5.3.9 - deiminase, ec:3.2.2.1 - nucleosidase, ec:1.17.3.2 - oxidase, ec:2.7.4.3 - kinase, ec:3.5.2.17…
TR124562|c0_g1_i1	Cysteine and methionine metabolism, One carbon pool by folate, Selenocompound metabolism	map00270, map00670, map00450	45, 14, 10	ec:1.13.11.53 - dioxygenase (Ni2+-requiring), ec:1.2.1.11 - dehydrogenase, ec:1.13.11.20 - dioxygenase, ec:4.4.1.14 - synthase, ec:2.6.1.57 - transaminase, ec:1.1.1.37 - dehydrogenase, ec:1.14.17.4 - oxidase, ec:2.6.1.5 - transaminase, ec:4.1.1.50 - decarboxylase, ec:2.1.1.13 - synthase, ec:2.5.1.49 - aminocarboxypropyltransferase, ec:2.3.1.30 - O-acetyltransferase, ec:2.1.1.5 - S-methyltransfera…
TR74101|c0_g3_i4	Fatty acid biosynthesis, Biotin metabolism	map00061, map00780	12, 9	ec:6.2.1.3 - ligase, ec:2.3.1.85 - synthase system, ec:6.4.1.2 - carboxylase, ec:3.1.2.14 - hydrolase, ec:4.2.1.59 - dehydratase, ec:2.3.1.86 - synthase system, ec:2.3.1.180 - synthase III, ec:2.3.1.39 - S-malonyltransferase, ec:2.3.1.41 - synthase I, ec:1.1.1.100 - reductase, ec:1.14.19.2 - 9-desaturase, ec:1.3.1.9 - reductase (NADH), ec:2.6.1.62 - transaminase, ec:4.2.1.59 - dehydratase, ec:2.3…
C767036	alpha-Linolenic acid metabolism, Propanoate metabolism, Fatty acid degradation, beta-Alanine metabolism, Biosynthesis of unsaturated fatty acids	map00592, map00640, map00071, map00410, map01040	11, 21, 14, 17, 6	ec:4.2.1.92 - dehydratase, ec:1.3.3.6 - oxidase, ec:2.3.1.16 - C-acyltransferase, ec:3.1.1.32 - A1, ec:1.3.1.42 - reductase, ec:1.1.1.1 - dehydrogenase, ec:1.13.11.12 - 13S-lipoxygenase, ec:5.3.99.6 - cyclase, ec:4.2.1.17 - hydratase, ec:2.1.1.141 - O-methyltransferase, ec:3.1.1.4 - A2, ec:4.1.1.9 - decarboxylase, ec:2.3.1.168 - (2-methylpropanoyl)transferase, ec:1.3.3.6 - oxidase, ec:4.2.1.79 - …
[truncated: 16,645 more rows]

## Sheet: One_pathway_per_row
Table S8 A comprehensive list of KEGG pathway being represented by the transcriptome of Mallotus japonicus and the number of unigenes being assigned to them.
[truncated: 140 more rows]
