# Supplementary material for: Gene-Metabolite Network Analysis Revealed Tissue-Specific Accumulation of Therapeutic Metabolites in Mallotus japonicus
Source: Int J Mol Sci. 2021 Aug 17;22(16):8835. doi: 10.3390/ijms22168835 (PMC8396295; doi:10.3390/ijms22168835)
Supplement: Supplementary file 1 [file ijms-22-08835-s001.zip › Supplementary_Table S9_FPKM_values_for_assembled_transcripts_of_Mallotus_japonicus_Megha.xlsx]

## Sheet: Sheet1
Table S9 FPKM values of all the assembled transcripts of Mallotus japonicus.
Transcript_id	FPKM_Young_Leaf	FPKM_Mature_Leaf	FPKM_Young_Stem	FPKM_Mature_Stem	FPKM_Bark	FPKM_Central_Cylinder	FPKM_Inflorescence
C727893	0	0	0	3.92	0	0	0
C727895	5.19	0	0	0	0	0	0
C727905	0	0	0	0	3.62	0	0
C727911	2.59	0	0	0	0	0	0
C727913	2.59	0	6.1	0	3.62	0	0
C727945	0	0	0	3.92	0	0	2.44
C727947	0	0	3.05	0	0	0	0
C727963	0	0	0	0	0	0	0
C727975	0	0	0	0	7.23	0	0
C727981	0	0	0	0	7.23	0	0
C727985	0	0	0	0	0	5.32	0
C727991	0	0	0	3.92	7.23	0	0
C727997	0	0	0	0	0	0	0
C728003	0	0	0	3.92	0	0	0
C728023	0	0	0	3.92	0	0	0
C728027	0	0	0	0	3.62	0	0
C728045	0	0	0	0	0	0	2.44
C728047	0	0	0	3.92	0	0	0
C728051	0	0	0	3.92	0	0	0
C728067	0	0	0	0	0	0	0
C728075	0	0	0	0	0	0	2.44
C728079	0	0	0	0	0	0	2.44
C728117	0	0	0	0	0	0	0
C728119	0	0	0	3.92	0	0	0
C728125	0	0	0	0	0	0	0
C728131	2.59	5.26	3.05	35.26	10.85	15.96	36.64
C728133	0	0	0	0	0	0	0
C728139	0	0	0	0	0	0	0
C728141	2.59	2.63	3.05	15.67	0	0	0
C728159	0	0	0	0	7.23	0	0
C728163	0	0	0	0	0	0	0
C728165	0	0	0	0	0	0	2.44
C728175	0	2.63	0	0	0	0	0
C728177	0	0	0	0	0	0	0
C728183	0	0	0	0	0	0	2.44
C728189	0	2.63	0	0	0	0	4.89
C728193	2.59	0	0	0	0	0	0
C728195	0	0	0	0	0	0	0
C728197	0	0	0	3.92	10.85	0	0
C728201	0	0	0	0	0	0	2.44
C728217	0	0	0	0	0	0	0
C728227	5.19	0	0	0	0	0	0
C728233	0	0	0	3.92	7.23	0	0
C728235	0	0	3.05	7.84	0	15.96	2.44
C728243	0	0	0	0	0	0	0
C728253	0	0	0	3.92	0	0	0
C728257	2.59	0	0	0	0	0	0
C728259	0	0	3.05	0	3.62	5.32	0
C728295	0	0	0	0	7.23	0	0
C728303	5.19	0	0	0	0	0	0
C728313	0	0	0	0	0	0	0
C728329	0	0	0	0	3.62	7.98	0
C728349	0	0	0	0	0	0	4.89
C728355	2.59	2.63	0	0	0	0	0
C728373	0	0	3.05	0	0	2.66	0
C728383	0	0	0	3.92	10.85	0	0
C728385	0	5.26	3.05	0	0	2.66	0
C728391	0	0	0	0	10.85	2.66	0
C728393	5.19	5.26	3.05	0	0	0	0
C728401	0	0	0	0	0	0	0
C728403	2.59	5.26	0	0	0	0	0
C728405	2.59	2.63	0	0	7.23	0	0
C728407	0	0	0	0	0	0	0
C728413	0	2.63	0	0	3.62	2.66	0
C728429	0	0	0	0	0	2.66	0
C728431	0	0	0	0	0	0	21.99
C728447	0	0	0	0	0	0	0
C728455	2.59	2.63	0	3.92	0	0	0
C728457	0	2.63	0	0	3.62	2.66	0
C728469	0	0	0	0	0	0	0
C728473	0	0	0	0	0	0	0
C728479	2.59	0	0	0	0	0	0
C728483	0	0	0	0	0	2.66	0
C728491	0	2.63	0	3.92	0	0	0
C728493	2.59	0	0	0	0	0	0
C728499	0	0	0	0	0	2.66	0
C728509	0	0	3.05	3.92	0	0	2.44
C728545	33.71	21.04	45.74	19.59	28.94	18.62	43.97
C728551	0	0	0	0	0	0	0
C728555	0	0	0	0	0	0	0
C728557	0	0	3.05	0	0	0	0
C728561	0	0	0	0	3.62	0	0
C728567	0	0	0	3.92	0	0	0
C728573	0	0	0	0	0	0	0
C728597	0	0	0	3.92	0	0	0
C728621	0	0	0	0	0	5.32	0
C728631	2.59	5.26	9.15	3.92	10.85	2.66	2.44
C728649	0	0	0	0	7.23	0	2.44
C728657	0	0	0	0	3.62	0	0
C728673	0	0	0	0	0	0	0
C728675	2.59	0	0	0	0	0	4.89
C728681	2.59	0	6.1	0	0	0	2.44
C728693	0	0	0	0	0	0	0
C728697	0	0	0	0	0	0	0
C728703	0	0	0	0	0	0	0
C728707	0	0	0	0	0	0	0
C728713	0	0	0	0	3.62	0	0
C728715	0	0	0	0	0	0	0
C728719	0	0	0	0	0	0	0
C728731	0	0	0	0	0	2.66	0
C728735	0	0	0	0	0	0	0
C728739	0	0	0	3.92	0	0	0
C728751	0	0	0	0	7.23	0	0
C728757	0	0	0	0	0	0	0
C728759	0	0	0	3.92	0	0	2.44
C728797	0	0	0	0	0	0	0
C728799	5.19	0	0	0	0	0	0
C728809	0	0	0	0	3.62	0	0
C728835	2.59	2.63	0	0	0	0	0
C728839	0	2.63	3.05	0	0	0	2.44
C728841	0	0	0	0	0	0	0
C728851	2.59	0	0	0	7.23	0	0
C728867	0	0	0	0	7.23	10.64	0
C728875	0	0	0	0	0	0	0
C728885	0	2.63	0	0	0	0	0
C728887	0	0	0	0	0	0	0
C728893	0	0	0	0	0	2.66	0
C728895	0	0	3.05	0	0	2.66	0
C728897	0	0	0	0	0	5.32	0
C728899	0	0	0	3.92	0	2.66	0
C728901	0	0	0	0	0	0	0
C728903	0	0	3.05	0	3.62	0	0
C728915	0	0	0	0	0	0	0
C728921	0	0	0	7.84	0	0	0
C728925	0	0	0	0	3.62	0	0
C728929	0	0	0	0	10.85	0	0
C728931	0	0	0	3.92	0	0	2.44
C728935	0	0	0	0	0	0	2.44
C728939	0	0	0	0	0	0	0
C728945	0	0	0	0	0	2.66	0
C728947	0	0	3.05	0	0	0	0
C728961	0	0	0	0	0	0	0
C728965	0	0	0	0	3.62	0	0
C728977	2.59	2.63	6.1	3.92	0	7.98	2.44
C728981	0	0	0	0	0	2.66	0
C728983	0	0	0	0	0	2.66	0
C728987	0	0	0	0	0	0	0
C728989	0	0	0	0	3.62	0	0
C729001	0	2.63	0	3.92	0	2.66	0
C729013	0	2.63	3.05	3.92	0	0	0
C729017	0	0	0	3.92	0	0	4.89
C729029	0	0	0	0	7.23	0	0
C729031	0	0	0	0	3.62	0	0
C729033	2.59	0	0	3.92	0	0	0
C729037	0	0	0	0	0	0	0
C729039	0	0	0	3.92	7.23	0	0
C729049	10.37	2.63	0	3.92	0	10.64	19.54
C729055	0	0	3.05	0	0	0	0
C729057	0	0	0	0	3.62	0	0
C729059	0	0	3.05	0	0	0	0
C729063	2.59	0	0	0	0	0	2.44
C729065	0	0	0	0	0	0	0
C729079	0	0	0	0	0	0	2.44
C729085	0	0	0	3.92	3.62	0	0
C729087	0	0	3.05	0	0	0	2.44
C729089	0	0	0	3.92	3.62	0	0
C729093	0	0	3.05	0	0	0	0
C729103	0	0	3.05	0	0	2.66	0
C729105	0	0	0	0	0	0	0
C729111	0	0	0	0	0	0	0
C729113	0	2.63	3.05	0	0	0	0
C729127	0	0	3.05	0	0	0	0
C729133	0	0	3.05	3.92	0	2.66	0
C729145	0	0	0	3.92	0	0	0
C729153	0	2.63	0	0	0	10.64	0
C729177	0	0	0	7.84	3.62	0	0
C729183	0	0	0	0	0	2.66	0
C729197	0	0	0	0	3.62	0	0
C729201	0	0	0	0	0	0	0
C729217	0	0	0	0	0	0	0
C729219	0	0	0	0	0	0	0
C729221	0	0	0	3.92	0	0	2.44
C729233	2.59	0	0	0	0	0	0
C729237	0	0	0	3.92	14.47	0	0
C729245	0	0	0	0	0	0	4.89
C729253	0	0	0	0	0	2.66	0
C729257	0	0	3.05	0	0	0	0
C729259	0	0	0	0	7.23	0	0
C729265	0	0	0	0	0	0	0
C729267	0	0	0	0	0	0	0
C729271	0	0	0	0	3.62	5.32	0
C729281	0	0	3.05	7.84	0	0	0
C729283	2.59	5.26	0	3.92	0	0	0
C729287	0	0	0	3.92	3.62	0	0
C729293	0	0	0	0	0	0	2.44
C729295	0	0	0	0	0	2.66	0
C729297	0	0	3.05	0	0	0	0
C729305	0	0	0	3.92	3.62	0	0
C729309	0	0	0	0	0	0	0
C729311	5.19	2.63	0	0	0	0	0
C729315	0	0	0	0	0	0	0
C729317	0	0	0	0	0	0	7.33
C729323	0	0	0	0	0	0	0
C729325	0	0	0	7.84	3.62	0	0
C729335	0	0	0	0	3.62	0	0
C729343	0	0	0	0	3.62	0	0
C729345	0	0	0	0	0	0	0
C729355	0	0	0	0	0	0	0
C729361	0	0	0	3.92	0	0	0
C729375	0	0	0	0	7.23	0	0
C729379	0	5.26	0	0	0	0	0
C729397	2.59	0	3.05	0	0	5.32	0
C729403	0	0	0	0	0	0	2.4
C729409	0	2.58	0	0	0	0	0
C729411	0	0	0	0	0	0	0
C729417	0	7.73	5.98	0	0	0	2.4
C729433	0	0	0	0	0	2.61	0
C729441	0	0	0	0	0	0	0
C729451	0	0	0	3.84	3.55	0	0
C729453	2.54	0	2.99	0	3.55	2.61	0
C729461	0	0	0	3.84	3.55	0	0
C729465	0	0	0	0	0	0	2.4
C729479	0	0	2.99	0	0	0	0
C729489	0	2.58	0	0	0	5.22	0
C729507	0	0	0	7.68	0	0	0
C729509	0	0	0	0	0	0	0
C729511	0	0	0	0	3.55	7.83	0
C729523	0	0	2.99	0	0	2.61	0
C729531	7.62	0	8.97	7.68	7.1	0	14.38
C729539	0	0	0	0	0	0	2.4
C729551	0	0	0	3.84	3.55	0	0
C729553	0	0	0	0	0	0	0
C729557	2.54	5.15	0	0	0	0	0
C729563	0	0	0	0	0	5.22	0
C729571	0	2.58	2.99	0	0	0	0
C729573	33.04	18.03	32.88	30.73	42.57	39.14	45.52
C729589	0	0	0	0	0	2.61	0
C729591	12.71	15.46	5.98	3.84	0	0	0
C729595	0	0	0	7.68	3.55	0	0
C729597	0	0	0	0	0	0	0
C729603	0	0	0	0	0	0	0
C729609	0	0	0	0	0	0	0
C729615	0	2.58	0	0	0	0	0
C729617	0	0	0	0	0	0	0
C729621	0	0	0	3.84	0	0	0
C729627	0	0	0	0	0	0	2.4
C729635	0	0	0	3.84	0	0	0
C729639	0	0	0	0	0	0	0
C729649	0	0	0	3.84	0	0	0
C729655	0	0	0	3.84	0	0	0
C729665	0	0	0	0	0	2.61	0
C729667	2.54	0	0	0	0	0	0
C729683	0	0	0	0	0	2.61	0
C729695	0	2.58	0	0	0	2.61	0
C729703	0	0	0	0	0	0	9.58
C729707	2.54	0	0	0	3.55	0	0
C729709	0	0	0	0	0	0	0
C729711	0	0	2.99	0	0	0	2.4
C729727	0	0	0	0	0	2.61	0
C729733	0	0	0	0	0	0	0
C729739	0	0	0	7.68	3.55	0	0
C729741	0	0	0	3.84	0	0	0
C729743	0	0	0	0	0	0	0
C729745	0	0	0	0	0	0	0
C729755	0	2.58	2.99	0	0	0	2.4
C729757	0	0	2.99	0	0	0	2.4
C729761	0	0	0	3.84	0	0	0
C729763	0	0	0	0	0	2.61	0
C729773	0	0	0	0	3.55	0	0
C729779	0	0	0	0	0	2.61	0
C729783	2.54	0	0	0	0	5.22	0
C729791	0	0	0	0	3.55	0	0
C729811	0	0	0	0	0	2.61	2.4
C729825	0	0	0	0	0	0	0
C729827	0	0	0	0	3.55	2.61	0
C729835	0	0	0	0	0	0	0
C729843	0	0	0	0	0	0	4.79
C729849	2.54	0	0	0	0	0	0
C729859	0	0	0	0	0	0	4.79
C729867	5.08	0	2.99	0	0	0	0
C729883	0	0	0	0	0	0	0
C729885	0	0	0	3.84	0	0	0
C729887	0	0	0	0	0	0	0
C729889	20.33	18.03	11.96	7.68	24.84	20.87	31.15
C729893	0	0	0	3.84	3.55	0	0
C729899	2.54	7.73	0	0	0	0	2.4
C729901	0	0	0	0	3.55	0	0
C729907	0	0	0	0	0	0	0
C729917	0	0	0	3.84	0	0	2.4
C729921	0	2.58	2.99	0	3.55	0	0
C729939	0	0	0	0	0	0	4.79
C729947	0	0	0	0	0	0	0
C729949	2.54	2.58	0	0	0	0	0
C729955	0	0	0	7.68	0	2.61	0
C729959	0	0	0	0	0	0	0
C729963	2.54	0	0	0	3.55	0	0
C729967	2.54	0	5.98	0	0	0	0
C729969	0	0	0	3.84	0	0	0
C729975	0	0	0	0	0	5.22	0
C729977	0	0	0	0	3.55	0	2.4
C729985	2.54	0	0	0	3.55	2.61	0
C730011	0	0	8.97	0	0	5.22	0
C730013	0	0	2.99	0	0	0	4.79
C730015	0	0	0	0	0	0	2.4
C730023	0	0	2.99	0	3.55	2.61	4.79
C730059	0	0	0	0	0	0	0
C730063	0	0	0	0	0	0	4.79
C730089	0	0	0	0	0	0	0
C730115	0	0	5.98	0	0	2.61	0
C730123	0	0	0	0	0	0	0
C730127	0	0	0	0	0	0	0
C730133	0	0	0	3.84	0	0	0
C730137	5.08	2.58	0	0	0	0	0
C730153	0	2.58	0	0	0	2.61	0
C730161	0	0	0	7.68	3.55	0	0
C730167	0	0	0	0	0	2.61	0
C730175	2.54	12.88	5.98	15.37	3.55	7.83	16.77
C730179	0	0	0	0	0	2.61	0
C730205	0	0	0	0	7.1	0	0
C730207	2.54	0	0	0	0	0	0
C730231	0	0	0	0	0	0	2.4
C730233	0	2.58	0	0	3.55	2.61	0
C730235	2.54	0	0	0	0	0	0
C730243	0	0	0	0	0	0	0
C730251	0	0	0	0	0	0	2.4
C730275	0	0	0	0	0	0	0
C730277	0	0	0	0	3.55	0	0
C730285	0	0	0	0	0	0	0
C730287	2.54	0	2.99	0	0	0	2.4
C730295	0	0	0	0	0	5.22	0
C730299	0	0	0	0	0	0	0
C730323	5.08	0	0	0	0	0	0
C730325	0	0	0	3.84	0	0	0
C730329	20.33	7.73	2.99	0	0	7.83	4.79
C730341	0	0	0	0	0	0	0
C730351	0	0	0	3.84	3.55	2.61	0
C730359	0	0	0	0	3.55	0	0
C730363	2.54	0	0	0	0	0	0
C730373	0	0	0	0	0	0	2.4
C730389	17.79	7.73	0	0	0	0	4.79
C730391	0	2.58	0	0	0	2.61	0
C730397	0	0	0	0	0	2.61	4.79
C730403	0	0	2.99	3.84	0	0	0
C730411	0	0	0	0	0	0	2.4
C730417	0	0	0	3.84	0	0	0
C730421	0	0	0	7.68	0	0	0
C730429	2.54	0	0	0	0	0	0
C730439	0	0	5.98	0	3.55	0	2.4
C730445	0	0	0	0	0	0	0
C730447	0	0	0	0	3.55	2.61	0
C730451	0	0	0	3.84	0	2.61	0
C730457	0	2.58	0	0	3.55	0	0
C730463	2.54	2.58	0	0	0	0	0
C730471	0	0	0	0	0	0	0
C730483	2.54	0	0	3.84	0	0	0
C730489	0	0	0	0	0	0	0
C730491	0	0	0	3.84	0	0	0
C730495	0	0	0	0	0	0	0
C730501	0	0	0	11.52	0	0	0
C730513	2.54	2.58	0	0	0	0	0
C730523	0	0	2.99	3.84	0	2.61	0
C730527	0	0	0	0	7.1	0	0
C730529	0	0	0	0	0	0	2.4
C730533	5.08	0	0	0	0	2.61	0
C730539	0	0	0	0	0	2.61	0
C730543	2.54	0	0	3.84	0	0	2.4
C730551	0	0	0	7.68	3.55	0	0
C730555	2.54	0	0	0	0	0	0
C730565	0	0	0	0	0	5.22	0
C730571	0	0	0	0	0	0	0
C730577	0	2.58	0	0	3.55	0	0
C730587	0	2.58	0	3.84	3.55	0	0
C730589	0	2.58	0	3.84	0	0	0
C730593	0	0	0	0	7.1	0	0
C730597	0	0	0	0	0	0	0
C730603	0	0	0	0	3.55	0	2.4
C730607	2.54	0	0	0	0	0	0
C730609	0	2.58	0	0	0	0	0
C730611	0	0	0	0	3.55	0	0
C730613	0	0	0	0	3.55	0	0
C730615	0	0	0	0	10.64	0	0
C730635	0	2.58	0	0	0	0	0
C730647	0	0	0	3.84	0	2.61	2.4
C730665	0	0	0	3.84	3.55	0	0
C730667	0	0	0	0	3.55	0	0
C730673	0	0	0	0	0	0	0
C730677	0	0	0	0	7.1	0	0
C730679	0	0	0	0	0	0	2.4
C730697	0	0	0	0	0	0	7.19
C730701	0	0	0	0	0	0	7.19
C730719	0	0	0	0	0	5.22	0
C730723	0	0	0	0	7.1	5.22	0
C730727	2.54	0	0	0	0	0	0
C730737	5.08	0	0	0	10.64	5.22	0
C730739	0	2.58	0	0	0	0	0
C730741	0	0	0	0	0	2.61	0
C730743	0	0	0	3.84	3.55	5.22	0
C730745	0	0	0	0	0	0	2.4
C730753	0	0	0	0	0	0	0
C730761	0	0	0	3.84	3.55	5.22	0
C730767	0	0	0	0	0	0	0
C730787	0	0	0	0	0	0	0
C730803	0	0	0	0	0	0	0
C730807	0	0	0	0	0	0	2.4
C730813	0	0	0	0	0	0	0
C730827	0	0	0	0	0	0	0
C730831	0	0	0	0	0	0	0
C730847	0	0	0	0	0	0	0
C730857	0	0	0	0	0	0	0
C730863	0	0	0	0	3.55	10.44	2.4
C730873	0	0	0	0	0	0	0
C730885	0	0	5.98	0	10.64	5.22	2.4
C730895	0	0	0	0	0	0	0
C730933	2.54	2.58	0	0	7.1	0	2.4
C730941	2.54	0	2.99	0	0	0	0
C730955	2.54	0	2.99	0	3.55	0	2.4
C730969	0	2.58	0	3.84	0	2.61	0
C730977	0	0	0	3.84	0	0	0
C730981	0	0	0	3.84	0	2.61	0
C730987	0	0	0	0	0	0	0
C730989	0	2.58	0	0	0	0	0
C730997	0	0	0	3.84	7.1	0	0
C731013	0	2.58	0	0	0	0	2.4
C731017	0	0	0	3.84	0	0	0
C731019	0	0	0	0	3.55	0	2.4
C731021	2.54	0	0	0	0	0	0
C731023	2.54	0	0	0	0	0	9.58
C731025	0	0	0	0	0	0	4.79
C731037	0	0	5.98	0	0	2.61	4.79
C731039	0	0	0	3.84	0	0	0
C731045	0	0	0	0	0	5.22	2.4
C731047	2.54	2.58	0	0	0	0	2.4
C731051	0	0	0	0	0	0	0
C731053	0	0	2.99	0	0	2.61	2.4
C731065	0	2.58	2.99	0	0	0	0
C731075	59.8	35.34	11.72	0	0	7.68	18.8
C731081	0	0	0	0	0	0	0
C731083	0	0	0	3.77	6.96	0	0
C731085	0	0	0	3.77	0	0	0
C731117	0	0	0	0	0	0	0
C731123	0	0	0	0	0	0	0
C731127	0	2.52	0	0	0	0	0
C731133	0	0	0	3.77	0	0	0
C731139	0	0	2.93	0	3.48	2.56	0
C731141	0	0	0	0	3.48	2.56	0
C731163	0	2.52	0	0	0	0	0
C731187	2.49	0	0	0	0	2.56	0
C731201	4.98	7.57	5.86	0	6.96	5.12	0
C731237	7.48	0	2.93	3.77	0	0	7.05
C731289	0	0	0	0	0	2.56	0
C731293	2.49	0	0	0	0	0	0
C731295	0	0	0	3.77	0	0	0
C731297	0	0	2.93	0	0	0	0
C731299	0	0	0	0	0	0	2.35
C731305	0	0	0	3.77	3.48	0	0
C731311	0	0	0	0	0	0	0
C731313	0	0	2.93	3.77	3.48	5.12	0
C731341	0	0	0	0	0	0	2.35
C731343	0	0	0	0	0	2.56	2.35
C731345	0	0	0	0	3.48	0	0
C731349	0	0	0	0	0	0	0
C731357	2.49	0	0	0	0	2.56	0
C731359	0	2.52	0	7.54	3.48	0	0
C731377	0	2.52	0	0	0	0	0
C731393	0	0	0	3.77	0	0	2.35
C731399	0	0	0	0	3.48	0	0
C731403	0	0	0	0	0	0	0
C731409	2.49	5.05	0	0	0	0	2.35
C731419	0	2.52	0	0	0	2.56	0
C731431	0	0	0	0	0	2.56	0
C731441	0	0	0	0	0	0	0
C731445	0	0	0	0	0	0	0
C731453	0	5.05	0	0	0	2.56	0
C731457	4.98	5.05	11.72	0	3.48	5.12	11.75
C731459	0	0	0	0	0	2.56	2.35
C731475	0	0	0	0	0	0	0
C731479	0	0	2.93	0	0	0	0
C731481	0	0	0	0	0	0	0
C731489	0	0	0	3.77	0	0	2.35
C731499	0	0	0	3.77	0	0	0
C731501	2.49	0	0	0	0	0	0
C731505	0	0	0	7.54	3.48	0	0
C731507	0	0	0	0	6.96	0	0
C731517	0	0	0	0	0	0	0
C731519	0	2.52	2.93	3.77	6.96	5.12	4.7
C731527	0	0	2.93	0	0	0	0
C731537	0	0	0	3.77	6.96	2.56	0
C731555	0	0	0	0	0	0	0
C731561	0	0	0	0	0	2.56	0
C731565	0	0	0	0	0	2.56	0
C731569	2.49	0	0	0	0	0	2.35
C731577	0	0	0	0	0	0	0
C731583	4.98	0	0	0	0	0	0
C731593	4.98	2.52	2.93	3.77	10.44	12.8	0
C731617	0	2.52	0	0	0	0	2.35
C731621	0	0	0	3.77	3.48	2.56	0
C731629	0	0	0	0	0	0	0
C731633	0	0	0	0	0	0	0
C731635	0	0	0	3.77	3.48	2.56	0
C731637	0	0	2.93	0	3.48	0	0
C731675	0	0	0	0	0	0	0
C731687	0	0	0	0	0	2.56	0
C731699	0	0	0	3.77	0	0	0
C731701	0	0	0	3.77	0	2.56	0
C731707	0	0	0	0	0	0	0
C731719	0	0	0	3.77	6.96	0	0
C731723	0	0	0	3.77	0	0	0
C731727	0	0	0	3.77	0	0	0
C731739	2.49	0	0	0	0	0	0
C731745	0	0	0	0	6.96	0	0
C731755	0	0	0	0	0	0	0
C731765	0	0	0	0	6.96	0	0
C731771	7.48	17.67	14.65	15.07	6.96	17.92	16.45
C731775	0	0	2.93	0	0	0	0
C731785	0	0	0	0	0	0	4.7
C731805	0	0	0	0	0	0	0
C731813	0	0	0	3.77	0	0	0
C731815	0	0	2.93	3.77	0	0	2.35
C731819	2.49	0	5.86	0	0	0	0
C731827	2.49	0	2.93	0	0	0	0
C731841	2.49	0	2.93	3.77	0	0	0
C731853	4.98	5.05	2.93	0	0	0	0
C731877	0	0	0	0	0	0	0
C731881	0	0	0	0	0	0	0
C731887	2.49	0	0	0	0	0	2.35
C731897	2.49	0	0	0	0	0	0
C731901	0	0	0	0	13.92	0	7.05
C731907	0	0	0	0	0	0	0
C731917	0	0	0	0	0	2.56	0
C731923	0	0	0	0	0	2.56	0
C731933	0	0	0	0	3.48	0	0
C731949	0	0	0	0	10.44	0	0
C731955	2.49	0	5.86	3.77	3.48	10.24	7.05
C731957	0	0	2.93	0	0	0	4.7
C731961	0	0	0	3.77	0	2.56	0
C731971	0	2.52	2.93	0	0	0	0
C731975	0	0	0	0	0	0	0
C731985	0	0	0	0	0	0	0
C731995	0	2.52	2.93	0	0	0	0
C732009	4.98	0	0	3.77	3.48	0	0
C732015	2.49	0	2.93	3.77	3.48	7.68	7.05
C732043	0	0	0	0	0	0	0
C732053	0	2.52	2.93	0	0	0	2.35
C732061	0	0	0	0	0	0	0
C732067	0	0	2.93	0	0	0	0
C732073	0	0	0	0	0	0	4.7
C732077	2.49	0	0	0	0	0	0
C732083	0	0	2.93	0	0	2.56	0
C732089	9.97	15.14	14.65	3.77	0	0	7.05
C732095	0	2.52	2.93	0	0	2.56	0
C732109	0	5.05	2.93	0	3.48	0	2.35
C732115	0	0	0	0	0	0	0
C732117	0	2.52	0	0	0	0	0
C732121	0	0	0	3.77	0	0	0
C732129	0	0	2.93	0	0	0	0
C732135	4.98	5.05	2.93	41.45	52.21	15.36	21.15
C732147	0	0	2.93	3.77	0	0	0
C732157	2.49	0	5.86	0	0	0	0
C732165	0	0	0	0	0	0	2.35
C732205	2.49	2.52	0	0	0	0	0
C732213	0	2.52	0	0	0	0	0
C732221	2.49	2.52	0	0	0	0	0
C732223	0	0	2.93	0	0	0	0
C732237	0	0	0	0	0	0	0
C732241	0	2.52	0	3.77	0	0	0
C732253	0	0	0	7.54	0	0	0
C732255	0	0	0	0	0	0	4.7
C732257	0	0	0	0	0	0	2.35
C732267	0	0	0	11.3	3.48	0	0
C732269	0	0	0	0	0	0	0
C732279	2.49	5.05	5.86	7.54	3.48	2.56	7.05
C732293	2.49	0	0	0	0	0	0
C732297	0	2.52	0	0	0	0	2.35
C732301	0	0	0	7.54	3.48	0	0
C732303	0	2.52	0	0	0	0	0
C732305	0	0	0	0	0	0	0
C732315	2.49	27.76	0	0	0	0	0
C732317	2.49	0	2.93	3.77	6.96	0	4.7
C732329	0	0	0	0	3.48	0	0
C732331	0	0	0	3.77	0	2.56	0
C732343	0	0	0	3.77	0	0	0
C732349	2.49	2.52	0	0	3.48	0	0
C732353	2.49	5.05	0	0	6.96	2.56	9.4
C732367	0	5.05	0	0	0	0	2.35
C732383	0	0	0	0	0	0	0
C732403	2.49	0	0	0	0	2.56	0
C732405	0	0	0	0	0	0	0
C732417	0	0	0	0	3.48	0	2.35
C732419	0	0	0	0	10.44	0	0
C732431	0	2.52	2.93	0	3.48	0	2.35
C732435	7.48	0	8.79	3.77	3.48	0	4.7
C732439	0	0	0	0	3.48	0	0
C732451	0	0	0	3.77	0	0	0
C732455	0	0	0	0	0	0	9.4
C732481	0	0	0	0	3.48	2.56	0
C732483	2.49	0	0	0	0	0	0
C732487	0	0	0	0	0	2.56	0
C732489	0	0	0	7.54	6.96	5.12	4.7
C732491	0	0	0	0	0	2.56	0
C732495	0	0	0	0	6.96	0	0
C732501	0	0	0	0	0	0	2.35
C732507	0	0	0	0	0	0	0
C732527	0	0	0	0	0	0	2.35
C732529	2.49	2.52	0	0	6.96	0	0
C732533	0	0	0	0	0	0	0
C732543	2.49	0	0	0	0	0	0
C732547	0	0	0	0	0	2.56	0
C732551	0	0	0	0	0	2.56	2.35
C732559	0	0	0	0	0	0	0
C732571	0	0	0	0	0	0	0
C732599	0	2.52	0	3.77	0	0	0
C732601	0	2.52	0	0	0	0	0
C732613	0	0	0	0	0	2.51	0
C732615	0	0	0	0	3.42	0	0
C732629	2.44	2.47	2.87	3.7	3.42	5.03	4.61
C732633	2.44	0	0	0	3.42	5.03	0
C732635	0	0	0	7.39	0	0	0
C732643	0	0	0	3.7	3.42	0	0
C732651	0	2.47	0	0	0	0	0
C732653	0	0	0	0	0	2.51	0
C732657	0	2.47	0	0	0	0	0
C732659	0	0	0	0	0	0	0
C732675	0	0	0	0	0	0	2.31
C732681	0	0	0	0	0	2.51	0
C732685	0	0	0	0	0	2.51	0
C732711	0	2.47	2.87	0	0	0	0
C732725	0	0	0	3.7	13.66	0	0
C732737	0	2.47	0	0	0	0	2.31
C732739	0	0	2.87	0	3.42	0	4.61
C732741	0	2.47	0	0	0	0	0
C732743	0	0	0	0	0	2.51	0
C732751	0	0	0	11.09	0	5.03	0
C732753	0	0	0	3.7	3.42	0	0
C732755	2.44	2.47	0	0	0	0	0
C732759	0	0	0	0	6.83	0	0
C732769	0	19.79	8.62	0	0	0	13.84
C732771	0	0	0	0	0	0	0
C732775	0	0	0	0	3.42	0	2.31
C732777	0	0	0	0	0	0	2.31
C732779	4.89	0	2.87	0	0	0	2.31
C732785	2.44	2.47	2.87	0	3.42	7.54	0
C732787	0	2.47	0	0	0	0	0
C732799	0	0	0	0	3.42	0	0
C732805	0	0	0	0	0	0	2.31
C732813	0	4.95	0	0	3.42	0	0
C732845	0	0	0	3.7	3.42	0	0
C732865	0	0	2.87	0	0	0	0
C732871	0	0	0	0	0	2.51	2.31
C732883	0	0	0	0	3.42	0	0
C732887	0	0	0	0	3.42	0	0
C732891	0	0	0	3.7	0	0	0
C732893	0	0	0	3.7	3.42	2.51	2.31
C732917	0	0	0	0	3.42	0	0
C732925	0	0	0	0	0	0	0
C732927	2.44	0	2.87	0	0	0	0
C732939	0	0	0	0	3.42	0	0
C732945	0	0	0	0	0	2.51	0
C732951	0	0	0	0	0	0	0
C732957	2.44	0	0	0	0	0	0
C732965	0	0	0	0	0	0	0
C732967	0	0	0	0	0	0	4.61
C732971	0	0	0	0	0	5.03	0
C732977	0	0	0	0	0	0	0
C732979	0	0	0	0	0	2.51	0
C732981	0	0	2.87	3.7	0	0	6.92
C732993	0	0	0	3.7	0	0	0
C733001	0	0	0	0	0	2.51	0
C733007	0	0	0	0	0	0	0
C733031	0	0	0	0	0	2.51	0
C733041	0	0	0	0	0	0	0
C733047	0	0	0	0	0	0	0
C733059	0	0	0	0	0	0	0
C733061	0	0	0	0	0	0	0
C733071	0	0	0	0	0	5.03	2.31
C733073	0	0	0	0	0	0	0
C733079	2.44	4.95	0	0	0	0	2.31
C733111	2.44	0	2.87	0	0	0	0
C733113	0	0	0	0	0	0	2.31
C733127	0	0	0	0	0	0	2.31
C733129	4.89	0	0	0	0	0	0
C733131	0	0	0	0	0	5.03	0
C733147	0	2.47	0	0	0	2.51	0
C733153	0	0	0	0	6.83	0	0
C733159	0	0	2.87	0	0	2.51	0
C733167	0	0	0	0	0	0	0
C733177	0	0	2.87	0	0	2.51	0
C733185	0	0	2.87	7.39	0	0	0
C733199	0	0	0	0	6.83	0	0
C733201	0	4.95	0	0	3.42	0	2.31
C733203	0	0	2.87	0	3.42	0	0
C733205	0	0	0	3.7	0	0	0
C733207	0	0	0	0	0	5.03	0
C733217	0	0	2.87	3.7	3.42	0	2.31
C733223	0	0	0	0	3.42	0	0
C733227	0	0	2.87	0	0	0	0
C733233	0	0	0	0	0	0	2.31
C733235	0	0	0	0	0	0	2.31
C733253	0	0	0	0	0	0	2.31
C733259	0	2.47	0	0	3.42	0	0
C733261	0	0	0	0	0	0	2.31
C733267	0	2.47	0	0	0	0	2.31
C733273	0	2.47	0	0	0	2.51	0
C733275	0	0	2.87	0	0	0	0
C733287	0	0	0	0	3.42	2.51	0
C733297	0	0	0	0	0	0	2.31
C733303	2.44	0	0	0	0	0	6.92
C733319	0	2.47	0	0	6.83	2.51	2.31
C733321	0	0	0	0	0	0	0
C733323	2.44	0	2.87	0	0	5.03	0
C733329	0	0	0	0	0	0	0
C733337	0	0	0	0	0	0	2.31
C733339	2.44	0	0	0	3.42	0	2.31
C733347	0	0	0	0	0	0	2.31
C733353	2.44	0	2.87	7.39	3.42	5.03	6.92
C733361	0	0	0	0	0	0	0
C733365	0	0	0	0	3.42	0	0
C733373	0	0	2.87	0	0	0	0
C733375	0	0	0	0	0	0	0
C733391	0	0	2.87	0	0	0	0
C733395	0	0	0	0	0	0	4.61
C733403	0	0	0	0	6.83	2.51	0
C733413	0	0	0	0	0	0	0
C733425	0	0	0	0	0	0	0
C733431	0	2.47	0	0	0	0	2.31
C733485	0	2.47	0	3.7	0	0	0
C733487	0	0	0	0	3.42	0	0
C733491	0	0	0	0	3.42	0	0
C733495	0	0	0	0	0	0	0
C733503	0	0	0	3.7	0	0	0
C733505	19.55	0	2.87	3.7	3.42	7.54	0
C733509	0	0	0	3.7	0	0	0
C733513	0	7.42	0	3.7	0	0	0
C733515	0	0	8.62	0	0	0	0
C733523	0	0	0	0	6.83	0	0
C733531	2.44	0	5.75	0	0	2.51	2.31
C733539	0	0	0	0	0	0	0
C733543	0	0	0	0	0	0	0
C733551	9.77	0	11.5	7.39	0	2.51	6.92
C733557	4.89	0	0	0	0	0	0
C733591	0	0	0	0	0	2.51	0
C733593	0	2.47	0	0	0	0	2.31
C733627	0	0	2.87	0	6.83	5.03	0
C733633	0	0	0	3.7	0	0	0
C733639	0	0	0	0	3.42	0	0
C733659	0	0	0	0	0	0	0
C733661	0	0	0	0	0	0	0
C733667	0	0	0	0	0	2.51	0
C733701	0	0	0	0	0	0	0
C733707	0	0	0	0	3.42	2.51	0
C733723	0	0	2.87	0	0	0	0
C733727	0	0	0	0	0	2.51	0
C733729	0	0	0	0	0	0	0
C733739	0	0	2.87	3.7	0	0	0
C733741	0	0	0	0	0	0	2.31
C733755	0	0	0	3.7	0	0	0
C733757	0	0	0	3.7	6.83	0	0
C733759	2.44	0	0	0	0	0	2.31
C733785	0	0	0	0	0	0	0
C733789	0	0	0	0	0	2.51	0
C733799	0	2.47	0	0	0	0	0
C733821	0	0	0	0	0	0	0
C733829	0	0	0	0	0	2.51	0
C733833	0	0	0	0	0	0	2.31
C733855	0	0	0	7.39	0	5.03	2.31
C733867	0	0	0	0	3.42	0	0
C733875	0	0	0	3.7	0	2.51	0
C733895	0	0	0	0	0	0	2.31
C733903	0	0	0	0	3.42	0	0
C733911	4.89	0	0	0	0	0	2.31
C733913	0	0	0	0	0	0	2.31
C733925	0	0	0	0	0	0	0
C733927	0	0	0	0	0	0	0
C733933	0	0	2.87	0	0	0	0
C733947	0	0	0	0	0	0	0
C733949	0	0	0	0	0	2.51	0
C733965	0	2.47	0	0	3.42	0	0
C733979	2.44	0	0	3.7	0	0	0
C733981	0	2.47	0	0	0	0	4.61
C733985	0	0	0	0	3.42	2.51	0
C733993	0	0	0	0	0	0	0
C733997	0	0	0	3.7	0	2.51	2.31
C733999	0	0	0	0	3.42	0	0
C734029	0	0	0	0	0	15.08	0
C734041	0	0	0	0	0	0	4.61
C734063	0	0	0	3.7	0	0	0
C734079	0	0	0	0	0	0	2.31
C734081	0	0	0	0	0	2.51	0
C734087	2.44	14.84	0	0	0	2.51	0
C734097	0	0	2.87	0	3.42	0	0
C734103	0	0	0	0	0	0	0
C734105	0	0	0	0	3.42	0	0
C734107	0	0	0	0	0	0	0
C734129	0	0	2.87	0	0	0	0
C734133	0	0	0	0	0	5.03	4.61
C734161	0	0	0	0	0	2.47	2.26
C734165	0	0	0	0	0	0	0
C734167	0	0	0	0	0	0	0
C734171	0	0	0	3.63	6.71	0	0
C734213	4.79	0	2.82	7.26	0	12.34	2.26
C734241	2.4	0	0	0	0	0	0
C734255	0	0	8.46	0	0	0	0
C734279	0	0	0	0	0	0	2.26
C734281	0	0	0	0	0	0	0
C734283	0	0	0	0	0	2.47	2.26
C734295	4.79	0	0	0	0	0	0
C734301	0	0	0	0	3.35	0	0
C734307	2.4	0	0	0	0	2.47	0
C734309	0	0	0	0	0	0	2.26
C734313	0	0	0	0	3.35	0	0
C734325	0	0	0	3.63	0	0	0
C734343	0	0	0	0	0	0	0
C734345	0	0	11.28	0	3.35	0	0
C734347	0	0	0	0	3.35	0	0
C734369	0	0	0	0	3.35	0	0
C734377	0	0	0	0	3.35	0	6.79
C734383	0	0	0	0	3.35	0	0
C734393	0	0	0	0	0	0	0
C734397	0	0	0	0	0	0	0
C734403	0	0	0	0	0	2.47	0
C734407	0	0	0	0	0	0	0
C734419	0	0	0	0	0	4.93	0
C734425	0	0	0	0	0	0	2.26
C734427	0	0	0	0	0	0	0
C734473	2.4	0	0	0	0	0	0
C734487	0	0	0	0	3.35	0	0
C734497	0	0	0	0	3.35	2.47	0
C734507	0	2.42	2.82	0	0	2.47	0
C734517	0	0	2.82	0	0	0	0
C734527	0	0	0	0	0	0	0
C734535	0	0	0	3.63	0	0	0
C734547	0	0	0	0	0	0	0
C734553	0	0	0	0	0	0	0
C734565	0	0	0	3.63	0	0	0
C734589	0	0	0	3.63	3.35	0	0
C734593	0	0	0	3.63	3.35	0	0
C734597	0	0	0	3.63	0	2.47	0
C734617	0	0	0	0	0	0	0
C734639	0	0	0	3.63	0	0	0
C734649	0	0	0	7.26	0	0	0
C734651	0	0	0	3.63	0	2.47	0
C734653	0	0	0	0	3.35	0	0
C734665	0	0	0	0	0	0	2.26
C734681	0	0	0	7.26	0	0	0
C734683	0	0	0	0	0	0	0
C734699	2.4	0	0	3.63	0	0	0
C734709	2.4	4.85	0	0	0	0	2.26
C734711	0	0	0	0	0	2.47	2.26
C734715	0	0	0	0	0	2.47	0
C734739	2.4	0	2.82	3.63	0	4.93	2.26
C734747	2.4	0	0	0	0	0	0
C734775	0	0	0	0	0	2.47	0
C734779	21.57	21.82	8.46	10.88	10.06	12.34	15.85
C734781	0	0	0	0	0	7.4	0
C734783	0	0	5.64	3.63	0	0	0
C734793	0	0	0	0	6.71	0	0
C734805	0	0	0	0	3.35	0	2.26
C734813	0	0	0	0	3.35	0	2.26
C734825	0	0	0	3.63	0	2.47	0
C734837	0	0	0	0	3.35	0	0
C734849	0	4.85	0	0	0	2.47	2.26
C734857	0	0	0	0	0	0	0
C734861	0	0	0	0	0	0	0
C734881	0	0	5.64	0	3.35	7.4	2.26
C734883	0	0	0	0	0	2.47	0
C734885	0	7.27	0	0	0	0	0
C734891	0	0	0	0	6.71	0	0
C734897	0	2.42	0	0	0	0	0
C734901	0	0	0	0	0	0	0
C734911	0	0	0	0	0	0	0
C734919	0	2.42	0	0	0	2.47	0
C734929	0	0	0	0	0	0	0
C734939	0	0	0	7.26	0	0	0
C734951	0	0	0	0	0	0	0
C734961	0	0	0	0	0	0	0
C734967	0	0	0	0	0	0	2.26
C734973	0	2.42	0	0	0	2.47	2.26
C734977	0	2.42	0	0	0	0	0
C734983	0	0	0	0	0	0	0
C734991	0	0	0	0	0	0	0
C734997	0	0	0	0	0	0	0
C735003	0	0	0	0	0	0	0
C735005	0	0	0	0	0	0	4.53
C735019	0	0	0	0	0	2.47	0
C735031	0	0	0	0	0	0	0
C735033	0	0	0	0	6.71	0	0
C735041	0	0	0	0	0	0	0
C735045	0	2.42	2.82	0	0	0	0
C735055	2.4	2.42	0	0	0	4.93	0
C735069	0	0	0	0	0	0	2.26
C735071	0	2.42	2.82	0	3.35	0	2.26
C735085	0	2.42	2.82	0	0	0	0
C735087	0	0	0	0	3.35	0	0
C735093	0	0	2.82	0	0	0	2.26
C735095	0	0	0	0	0	0	0
C735109	0	0	0	0	0	0	0
C735111	0	0	0	3.63	0	2.47	0
C735113	35.96	16.97	25.37	7.26	13.41	4.93	22.64
C735127	2.4	0	0	0	0	0	2.26
C735131	0	0	0	0	0	0	9.06
C735137	0	0	0	0	0	0	0
C735153	2.4	0	2.82	3.63	0	0	0
C735177	0	0	0	0	0	0	4.53
C735191	0	0	0	0	0	0	0
C735197	0	0	0	0	3.35	0	0
C735199	0	0	0	0	0	0	0
C735209	0	0	0	0	0	0	0
C735213	0	4.85	2.82	0	0	0	0
C735215	2.4	0	0	0	3.35	0	0
C735231	7.19	7.27	11.28	0	3.35	9.87	4.53
C735235	0	0	0	0	3.35	0	0
C735243	0	0	0	3.63	10.06	2.47	0
C735249	0	0	0	3.63	0	0	4.53
C735255	0	2.42	0	3.63	0	0	0
C735257	2.4	2.42	0	0	0	0	0
C735261	28.77	4.85	2.82	25.39	6.71	24.67	9.06
C735277	0	0	5.64	0	3.35	2.47	0
C735299	0	0	0	3.63	0	0	0
C735303	0	0	0	0	3.35	2.47	0
C735307	0	0	0	3.63	3.35	0	0
C735327	2.4	0	0	0	0	0	0
C735329	0	0	0	0	0	0	0
C735347	0	0	0	0	0	4.93	0
C735349	0	0	2.82	0	0	0	0
C735361	7.19	9.7	8.46	18.14	3.35	7.4	15.85
C735367	0	0	2.82	0	0	2.47	0
C735371	0	0	2.82	3.63	0	0	0
C735389	0	0	0	0	0	9.87	0
C735395	0	0	2.82	0	0	0	0
C735405	0	0	0	0	0	4.93	0
C735427	0	0	0	7.26	0	0	0
C735433	0	0	0	0	0	0	0
C735437	0	0	5.64	0	3.35	0	4.53
C735445	2.4	0	0	0	0	0	0
C735453	0	0	0	0	0	0	0
C735465	0	0	0	0	0	0	0
C735481	0	0	0	10.88	0	2.47	0
C735491	0	2.42	5.64	0	0	0	0
C735495	0	0	0	10.88	3.35	0	0
C735501	0	4.85	0	0	3.35	0	0
C735505	0	0	0	0	3.35	0	0
C735507	0	0	0	0	3.35	0	2.26
C735515	0	0	0	0	10.06	0	0
C735519	0	2.42	0	0	0	0	0
C735523	0	0	0	0	0	0	0
C735539	0	0	0	0	0	2.47	0
C735541	0	0	0	0	0	0	0
C735557	0	0	0	0	6.71	0	0
C735568	0	0	0	0	0	0	0
C735572	0	0	0	0	0	0	0
C735576	0	0	0	0	0	0	0
C735578	0	0	0	0	0	2.47	0
C735588	0	2.42	0	0	0	0	0
C735592	0	0	0	0	0	0	0
C735602	0	0	0	0	0	0	0
C735612	0	0	0	0	0	0	2.26
C735620	0	0	0	0	0	2.47	2.26
C735626	2.4	0	2.82	0	0	0	0
C735632	0	0	0	0	0	0	0
C735634	2.35	0	0	0	0	0	0
C735636	0	0	2.77	3.56	0	4.85	0
C735656	0	0	0	0	9.88	0	0
C735660	2.35	0	0	0	0	2.42	0
C735662	0	0	2.77	0	0	0	0
C735664	0	0	0	3.56	0	0	0
C735666	0	4.76	2.77	0	0	0	0
C735670	0	0	0	0	0	2.42	0
C735688	0	0	0	3.56	3.29	0	0
C735690	0	0	5.53	0	0	0	0
C735694	0	0	2.77	0	0	2.42	2.22
C735700	0	0	0	0	0	0	2.22
C735706	0	0	0	3.56	0	0	0
C735710	0	0	0	3.56	0	0	0
C735716	0	0	0	0	3.29	0	0
C735736	0	0	0	0	6.58	0	0
C735742	0	0	0	0	6.58	0	0
C735746	0	2.38	0	3.56	0	0	0
C735748	0	0	0	0	0	0	0
C735754	0	4.76	0	0	0	0	2.22
C735768	0	0	0	0	0	0	0
C735776	0	0	0	0	0	0	0
C735786	0	0	0	0	6.58	7.27	0
C735796	2.35	0	0	0	0	0	0
C735804	0	4.76	0	0	0	0	0
C735806	0	0	0	0	6.58	0	0
C735810	0	0	2.77	3.56	0	0	0
C735812	0	0	5.53	3.56	6.58	2.42	0
C735816	0	0	0	7.12	3.29	0	0
C735828	0	7.13	2.77	3.56	6.58	12.11	6.67
C735832	7.06	0	5.53	0	0	0	0
C735846	0	0	0	0	0	12.11	0
C735866	2.35	0	0	0	0	0	0
C735870	0	0	0	0	0	0	0
C735890	0	0	0	3.56	0	0	2.22
C735906	0	0	0	7.12	0	0	0
C735916	0	2.38	0	0	3.29	0	0
C735920	0	0	0	0	0	0	0
C735924	0	0	0	0	0	0	0
C735932	7.06	0	8.3	7.12	6.58	4.85	2.22
C735946	2.35	2.38	0	0	0	0	0
C735948	0	0	0	3.56	0	0	0
C735950	0	0	2.77	0	0	0	2.22
C735956	0	0	0	3.56	3.29	0	4.45
C735970	0	0	0	0	0	2.42	0
C735974	0	0	2.77	3.56	0	2.42	2.22
C735980	0	0	0	0	6.58	2.42	2.22
C735986	0	0	0	0	0	2.42	0
C736002	0	0	0	0	0	0	0
C736006	0	0	0	0	0	0	0
C736008	0	0	0	0	0	0	0
C736024	0	0	0	3.56	0	2.42	0
C736028	0	0	0	0	0	0	0
C736052	0	0	0	0	0	0	2.22
C736054	23.52	4.76	5.53	0	0	2.42	0
C736056	0	4.76	0	0	3.29	0	0
C736066	0	0	0	7.12	6.58	2.42	0
C736074	0	2.38	0	0	0	0	0
C736106	0	0	0	3.56	0	0	0
C736108	2.35	0	0	0	0	0	4.45
C736110	0	0	2.77	0	0	0	0
C736112	0	4.76	0	3.56	0	0	0
C736118	14.11	19.02	19.36	7.12	6.58	31.5	13.34
C736128	0	0	2.77	0	0	2.42	0
C736134	0	0	0	0	6.58	0	0
C736164	0	2.38	0	0	0	2.42	0
C736168	2.35	2.38	0	0	0	0	0
C736174	0	0	0	0	0	2.42	0
C736176	0	0	0	0	6.58	0	0
C736204	0	0	0	0	6.58	0	0
C736206	0	0	0	7.12	0	0	0
C736232	0	0	0	0	0	0	2.22
C736274	4.7	0	0	0	0	0	0
C736280	0	0	2.77	0	0	0	0
C736288	0	4.76	0	0	3.29	2.42	2.22
C736292	0	0	0	0	0	0	0
C736294	0	0	0	3.56	0	0	0
C736298	0	0	0	0	0	0	0
C736314	2.35	2.38	0	0	3.29	0	2.22
C736322	0	2.38	2.77	0	3.29	0	0
C736336	0	0	0	0	0	0	0
C736372	0	0	0	0	0	4.85	0
C736380	0	0	0	0	0	2.42	0
C736388	0	4.76	2.77	0	0	0	0
C736392	0	4.76	0	0	0	0	0
C736400	4.7	0	2.77	0	0	2.42	0
C736402	0	2.38	2.77	3.56	0	2.42	0
C736404	0	0	0	7.12	6.58	0	0
C736416	2.35	0	0	0	0	14.54	0
C736420	2.35	2.38	2.77	0	0	2.42	2.22
C736444	2.35	0	0	0	0	0	0
C736482	0	0	0	0	0	2.42	0
C736484	0	0	0	0	3.29	2.42	0
C736486	0	0	0	0	0	2.42	0
C736490	4.7	0	0	0	0	0	2.22
C736498	0	0	0	0	0	0	0
C736502	0	7.13	2.77	3.56	0	0	6.67
C736506	0	0	0	0	0	2.42	0
C736518	0	0	0	0	0	0	4.45
C736522	0	0	0	3.56	0	0	0
C736524	0	0	0	0	0	0	4.45
C736526	0	0	0	3.56	0	2.42	0
C736530	0	0	0	3.56	0	0	0
C736534	7.06	11.89	0	3.56	3.29	2.42	2.22
C736538	0	0	2.77	0	0	2.42	0
C736586	0	0	0	0	9.88	0	0
C736590	0	0	0	0	0	2.42	0
C736592	0	0	2.77	0	0	0	0
C736612	2.35	0	0	0	0	0	0
C736622	0	2.38	0	0	0	0	0
C736636	0	0	0	0	3.29	0	0
C736640	0	0	0	0	0	0	0
C736646	0	0	0	0	0	2.42	0
C736648	2.35	0	0	0	0	0	0
C736654	2.35	0	0	0	0	0	2.22
C736670	0	0	0	0	0	2.42	2.22
C736674	0	0	0	0	6.58	0	0
C736684	0	0	0	0	0	2.42	0
C736686	0	2.38	0	3.56	0	0	0
C736696	0	2.38	0	0	0	0	0
C736710	0	2.38	0	0	0	2.42	0
C736728	0	0	0	3.56	3.29	0	0
C736738	0	0	0	10.68	0	0	0
C736740	0	0	0	0	0	2.42	0
C736776	0	0	0	3.56	0	0	2.22
C736780	0	0	0	0	0	0	0
C736798	2.35	0	0	0	0	0	0
C736802	0	2.38	0	0	0	0	2.22
C736814	14.11	2.38	0	0	0	0	2.22
C736816	0	0	0	0	0	2.42	0
C736826	2.35	0	0	0	0	2.42	0
C736836	2.35	0	0	0	0	2.42	4.45
C736840	0	0	0	0	3.29	0	0
C736850	0	2.38	2.77	0	13.17	4.85	0
C736862	0	0	0	3.56	3.29	0	0
C736870	0	0	0	0	0	7.27	2.22
C736876	0	0	0	0	0	0	0
C736888	0	0	0	0	0	0	0
C736902	0	0	0	0	3.29	0	0
C736926	0	4.76	8.3	3.56	0	21.81	17.78
C736938	0	0	0	0	0	0	0
C736940	0	0	0	0	6.58	0	0
C736942	0	0	0	0	0	0	0
C736952	0	0	0	3.56	0	0	0
C736970	0	0	0	0	3.23	0	0
C736972	18.47	18.66	13.57	24.47	22.63	21.42	17.46
C736974	0	0	0	0	0	0	0
C736980	13.85	2.33	5.43	6.99	0	9.52	0
C736992	2.31	2.33	0	3.5	0	2.38	6.55
C736998	0	0	0	0	3.23	0	0
C737000	0	0	0	0	3.23	0	0
C737022	0	2.33	0	3.5	0	0	2.18
C737034	4.62	0	2.71	0	0	0	0
C737044	0	0	0	3.5	3.23	0	0
C737046	0	2.33	0	3.5	0	2.38	0
C737054	0	0	5.43	0	0	0	0
C737060	0	0	0	0	0	2.38	0
C737062	0	0	0	3.5	0	0	0
C737070	0	0	0	0	0	0	2.18
C737076	2.31	0	0	0	0	0	0
C737082	0	0	2.71	0	3.23	0	0
C737092	0	0	0	0	0	4.76	0
C737108	0	0	0	0	0	0	2.18
C737112	2.31	0	0	0	0	0	0
C737128	0	0	0	0	0	0	0
C737130	0	0	0	0	0	0	2.18
C737148	0	0	0	0	0	0	0
C737162	0	2.33	0	0	0	0	0
C737180	0	0	5.43	3.5	0	0	0
C737182	0	0	0	6.99	0	0	0
C737192	0	0	2.71	0	0	0	0
C737204	0	0	0	0	6.47	0	0
C737212	0	0	0	0	3.23	0	0
C737218	0	0	0	3.5	0	0	0
C737222	0	0	2.71	0	0	0	0
C737244	20.78	13.99	27.15	6.99	22.63	23.8	13.1
C737256	0	0	0	3.5	0	0	0
C737258	0	0	0	0	0	0	0
C737260	0	0	0	0	3.23	0	0
C737276	0	0	0	6.99	3.23	0	0
C737280	0	0	0	0	0	2.38	0
C737298	0	0	0	3.5	3.23	0	0
C737300	0	0	0	0	0	2.38	0
C737302	0	2.33	0	0	0	0	0
C737304	4.62	0	2.71	0	0	0	0
C737314	0	2.33	0	3.5	0	0	0
C737322	4.62	2.33	2.71	0	0	0	2.18
C737324	0	0	0	0	0	2.38	0
C737330	0	0	0	0	0	0	2.18
C737346	0	0	2.71	0	0	0	2.18
C737350	0	4.66	2.71	0	3.23	0	0
C737358	0	0	0	0	0	0	2.18
C737360	0	0	8.14	0	3.23	0	10.91
C737364	0	2.33	0	0	3.23	0	0
C737380	0	0	0	0	0	0	0
C737382	0	0	0	3.5	0	0	0
C737394	0	0	0	0	3.23	0	0
C737402	0	0	0	0	3.23	0	0
C737406	0	0	0	0	0	0	4.37
C737410	4.62	2.33	0	0	0	0	0
C737418	2.31	2.33	2.71	3.5	0	2.38	2.18
C737420	0	2.33	0	0	0	0	0
C737438	2.31	0	0	0	0	0	0
C737464	0	0	0	0	0	0	0
C737466	0	0	2.71	0	0	0	0
C737476	0	0	0	0	0	2.38	0
C737478	4.62	4.66	5.43	3.5	3.23	2.38	4.37
C737486	0	0	0	0	0	0	0
C737488	0	0	2.71	3.5	3.23	2.38	0
C737492	0	0	0	3.5	0	0	0
C737494	2.31	2.33	0	0	0	0	0
C737510	0	0	0	0	6.47	0	0
C737518	0	0	0	0	0	2.38	0
C737532	0	2.33	0	0	0	2.38	0
C737546	0	0	0	0	3.23	0	0
C737550	0	0	0	3.5	0	0	0
C737570	0	0	0	0	0	0	0
C737574	0	2.33	0	0	0	0	6.55
C737578	0	0	0	0	0	0	0
C737582	0	0	0	3.5	0	2.38	2.18
C737584	0	0	0	0	0	0	0
C737590	0	0	0	0	0	7.14	0
C737596	0	0	0	0	0	4.76	0
C737600	0	0	2.71	0	0	0	0
C737602	0	0	0	3.5	3.23	0	0
C737606	0	0	0	0	3.23	0	0
C737610	0	2.33	0	6.99	0	4.76	0
C737612	2.31	0	0	0	0	0	2.18
C737614	0	0	0	0	0	0	2.18
C737616	0	0	0	0	0	0	4.37
C737626	0	0	0	0	0	0	2.18
C737630	0	0	0	0	0	0	2.18
C737638	0	0	0	0	0	0	0
C737662	0	2.33	2.71	0	3.23	0	0
C737692	0	0	0	0	0	0	0
C737710	0	0	5.43	0	0	2.38	0
C737720	0	0	2.71	3.5	0	0	0
C737722	6.93	0	2.71	0	3.23	4.76	4.37
C737724	0	2.33	0	3.5	0	0	0
C737760	0	0	0	0	0	2.38	0
C737784	0	0	0	0	3.23	0	0
C737794	0	0	5.43	3.5	0	0	8.73
C737812	0	0	0	0	0	0	0
C737818	0	0	0	10.49	0	0	0
C737830	2.31	2.33	0	0	0	2.38	0
C737832	0	0	0	0	0	0	0
C737836	0	0	0	0	0	2.38	0
C737842	0	0	0	3.5	3.23	0	0
C737860	0	0	0	3.5	3.23	2.38	0
C737878	0	0	2.71	0	0	0	0
C737892	0	0	0	0	0	0	2.18
C737908	0	0	5.43	0	0	0	2.18
C737912	0	0	0	0	0	0	0
C737930	0	0	0	6.99	6.47	2.38	0
C737946	0	0	0	0	0	0	0
C737966	0	0	0	3.5	0	0	0
C737978	0	0	0	0	0	0	0
C737986	0	0	0	0	0	2.38	0
C737994	0	0	0	3.5	0	0	2.18
C737996	0	0	0	0	0	2.38	0
C738002	0	0	0	0	3.23	2.38	0
C738004	0	0	0	0	0	0	0
C738020	0	0	0	0	3.23	0	0
C738032	2.31	9.33	5.43	6.99	9.7	0	6.55
C738052	0	2.33	0	3.5	3.23	2.38	0
C738060	0	0	0	0	3.23	0	0
C738070	2.31	0	5.43	0	0	0	0
C738074	2.31	0	2.71	0	0	4.76	0
C738088	0	0	0	0	6.47	0	0
C738104	2.31	0	0	0	0	0	0
C738106	2.31	0	0	0	0	0	0
C738110	0	0	0	0	3.23	2.38	0
C738112	0	0	0	3.5	3.23	0	0
C738134	0	0	0	0	0	0	2.18
C738138	2.31	0	0	0	0	0	0
C738148	0	0	0	0	0	2.38	4.37
C738150	2.31	2.33	5.43	10.49	22.63	16.66	4.37
C738152	0	0	0	0	0	2.38	0
C738158	0	0	0	0	0	0	0
C738162	0	0	0	3.5	3.23	0	0
C738168	0	0	0	0	0	0	0
C738190	2.31	0	0	0	0	0	0
C738202	2.31	0	0	0	3.23	0	2.18
C738224	0	0	2.71	0	0	0	0
C738240	2.31	0	0	0	0	2.38	0
C738244	0	0	0	0	3.23	2.38	0
C738254	0	0	0	0	0	2.38	0
C738266	0	0	0	0	0	4.76	0
C738276	0	0	0	0	0	0	0
C738288	2.31	2.33	2.71	6.99	3.23	9.52	2.18
C738294	0	0	0	3.5	0	0	0
C738306	0	0	0	0	3.23	2.38	0
C738308	0	0	0	3.5	3.23	0	0
C738334	2.31	2.33	0	0	0	0	0
C738368	4.53	0	5.33	3.43	0	2.34	0
C738370	0	2.29	0	0	3.18	0	0
C738372	0	2.29	0	0	0	0	0
C738400	0	0	0	3.43	6.35	0	0
C738414	0	0	0	10.3	12.7	0	0
C738416	0	4.58	0	3.43	3.18	0	0
C738426	0	2.29	0	0	0	0	0
C738434	0	0	0	0	0	0	0
C738468	0	0	0	0	0	0	0
C738472	0	0	0	0	0	0	0
C738474	2.27	0	0	0	0	0	0
C738478	0	2.29	2.67	0	0	0	2.14
C738486	0	0	0	3.43	9.53	0	0
C738492	0	0	2.67	0	0	0	0
C738494	2.27	0	0	0	0	0	0
C738514	0	0	0	0	0	0	0
C738524	0	2.29	0	0	0	0	2.14
C738538	4.53	0	18.66	0	0	2.34	4.29
C738550	4.53	2.29	2.67	0	0	2.34	0
C738564	6.8	11.44	18.66	3.43	0	9.35	12.86
C738566	0	0	0	0	0	0	2.14
C738570	0	2.29	0	0	0	0	0
C738572	0	2.29	0	6.87	6.35	7.02	6.43
C738582	0	0	0	0	0	2.34	0
C738590	0	0	0	0	0	0	0
C738594	2.27	4.58	2.67	0	0	0	0
C738598	0	0	2.67	0	0	0	0
C738608	0	0	0	0	0	0	2.14
C738614	0	0	0	3.43	3.18	0	0
C738646	0	0	0	0	3.18	0	6.43
C738648	0	0	0	0	3.18	0	0
C738674	2.27	4.58	0	0	0	0	0
C738708	0	0	0	0	3.18	0	0
C738724	0	0	0	0	0	4.68	2.14
C738728	0	2.29	0	0	0	0	2.14
C738732	0	0	2.67	0	3.18	0	0
C738734	0	0	0	0	0	0	0
C738748	0	0	0	6.87	0	0	0
C738754	0	0	0	0	0	0	0
C738766	4.53	0	0	0	0	0	0
C738770	2.27	0	0	0	0	0	0
C738784	0	0	0	0	3.18	0	2.14
C738790	0	0	0	3.43	0	0	0
C738794	0	0	0	0	0	2.34	0
C738812	0	0	0	0	0	0	0
C738822	0	0	5.33	0	0	0	0
C738834	0	0	0	0	0	0	0
C738840	0	0	0	3.43	3.18	0	0
C738846	0	2.29	2.67	6.87	9.53	0	0
C738848	0	2.29	0	0	0	0	0
C738862	0	0	0	3.43	0	0	0
C738866	0	0	0	0	0	0	2.14
C738874	0	0	2.67	0	0	0	0
C738878	0	0	0	0	0	0	4.29
C738886	0	0	0	0	0	0	0
C738910	0	0	0	3.43	3.18	0	0
C738916	0	0	0	0	0	0	4.29
C738918	2.27	0	2.67	0	0	0	0
C738932	0	0	0	3.43	0	0	0
C738938	0	0	0	3.43	0	0	0
C738952	4.53	0	2.67	0	0	0	0
C738972	0	0	0	0	0	2.34	2.14
C738978	0	2.29	0	0	0	0	0
C738982	0	0	0	0	0	4.68	2.14
C738998	0	0	0	0	3.18	0	0
C739004	2.27	11.44	0	0	0	0	0
C739006	0	2.29	0	0	3.18	0	0
C739012	4.53	4.58	5.33	3.43	0	0	0
C739018	2.27	0	5.33	3.43	0	0	0
C739036	4.53	4.58	5.33	3.43	0	2.34	0
C739052	2.27	2.29	13.33	44.64	54	51.44	25.72
C739058	0	0	0	0	0	2.34	0
C739060	0	2.29	0	3.43	0	0	0
C739062	0	0	0	0	0	0	0
C739076	0	2.29	0	0	6.35	2.34	0
C739098	0	0	0	0	3.18	0	0
C739106	0	0	0	0	0	0	4.29
C739124	2.27	2.29	5.33	0	0	2.34	2.14
C739128	2.27	2.29	0	0	0	0	4.29
C739144	0	0	0	0	6.35	0	0
C739164	0	0	0	0	0	0	0
C739212	0	0	0	0	0	4.68	0
C739224	0	0	0	0	0	0	0
C739228	0	0	0	0	3.18	0	0
C739248	0	0	2.67	0	0	0	0
C739260	6.8	4.58	0	0	0	0	6.43
C739266	0	0	0	0	0	2.34	0
C739268	2.27	0	0	0	0	0	0
C739276	0	0	0	0	0	0	0
C739282	0	0	2.67	0	0	0	0
C739284	2.27	0	2.67	0	3.18	0	8.57
C739290	2.27	0	0	0	3.18	0	0
C739302	0	0	0	0	3.18	2.34	0
C739316	0	0	0	0	0	0	2.14
C739322	0	0	0	0	0	0	0
C739358	2.27	0	0	0	0	0	0
C739368	0	2.29	0	0	0	0	0
C739394	0	0	0	0	0	0	0
C739408	0	0	0	0	0	0	2.14
C739416	0	0	0	3.43	3.18	0	0
C739426	0	0	0	3.43	0	2.34	2.14
C739450	0	0	0	0	0	0	0
C739456	0	0	0	3.43	0	0	0
C739458	0	0	0	0	3.18	0	0
C739466	2.27	0	0	0	0	0	2.14
C739472	0	2.29	0	0	0	0	0
C739492	6.8	2.29	8	10.3	15.88	16.37	2.14
C739500	0	0	0	0	0	0	0
C739502	0	0	0	3.43	0	2.34	0
C739516	0	0	2.67	0	0	0	0
C739526	0	0	0	0	0	0	0
C739536	0	0	0	3.43	0	0	2.14
C739544	2.27	0	0	0	0	0	0
C739546	0	0	0	0	0	2.34	0
C739552	0	0	0	3.43	3.18	0	0
C739572	2.27	2.29	0	0	0	0	2.14
C739588	2.27	0	0	0	0	0	0
C739604	0	0	0	0	3.18	0	0
C739624	0	0	0	0	0	0	2.14
C739626	0	0	2.67	0	0	2.34	0
C739630	33.99	29.74	13.33	0	0	0	8.57
C739638	0	0	0	0	3.18	0	0
C739640	0	2.29	0	0	0	0	2.14
C739648	0	0	0	0	0	0	0
C739660	0	0	0	0	0	0	0
C739666	4.53	0	0	0	0	0	2.14
C739674	0	0	0	0	0	0	2.14
C739676	2.27	0	0	0	0	0	0
C739688	0	0	0	0	0	2.34	0
C739692	0	0	0	0	0	2.34	0
C739702	2.27	0	0	17.17	0	7.02	10.72
C739706	0	0	0	0	9.53	0	0
C739712	0	2.29	0	0	0	0	0
C739726	0	0	0	3.43	0	2.34	2.14
C739728	2.27	0	2.67	0	0	0	0
C739730	0	0	0	0	0	2.34	0
C739732	0	0	0	3.43	0	0	0
C739734	0	2.29	2.67	0	3.18	0	0
C739742	0	0	0	0	0	0	8.57
C739750	0	0	0	3.43	0	0	2.14
C739754	2.27	0	0	0	0	0	0
C739760	2.27	2.29	2.67	0	0	0	0
C739766	0	2.25	0	256.34	196.61	0	6.32
C739796	0	0	0	0	6.24	0	0
C739816	4.45	4.49	0	0	6.24	2.3	0
C739844	0	2.25	0	0	0	0	0
C739854	0	0	0	0	0	0	0
C739862	0	0	0	0	6.24	0	0
C739870	0	0	0	0	6.24	0	0
C739874	0	0	0	0	0	0	0
C739886	0	4.49	0	0	0	0	0
C739888	0	0	0	0	0	0	0
C739900	0	0	0	0	3.12	0	2.11
C739902	0	0	2.62	0	0	0	0
C739914	0	0	0	0	0	0	0
C739918	0	0	0	6.75	3.12	0	0
C739924	2.23	6.74	5.23	3.37	0	0	0
C739934	2.23	0	0	0	0	4.6	0
C739938	2.23	0	0	0	0	0	0
C739942	0	0	0	0	0	0	2.11
C739948	2.23	2.25	0	0	0	0	0
C739954	0	2.25	0	0	9.36	0	0
C739968	0	0	0	3.37	0	0	0
C739976	0	0	0	3.37	0	0	0
C739990	2.23	2.25	0	0	0	0	0
C739994	0	0	5.23	0	0	0	0
C739996	0	0	2.62	0	0	0	0
C740000	2.23	0	2.62	3.37	6.24	4.6	2.11
C740008	0	0	0	3.37	0	0	0
C740010	0	0	0	0	3.12	0	0
C740012	0	0	0	0	0	2.3	0
C740058	0	0	0	0	0	0	4.21
C740070	0	0	2.62	0	18.72	0	0
C740086	2.23	0	0	0	0	0	2.11
C740108	0	4.49	0	0	0	0	0
C740112	0	0	0	0	0	0	0
C740116	0	0	0	0	0	2.3	2.11
C740124	0	0	0	0	0	0	0
C740128	2.23	2.25	2.62	0	0	0	0
C740134	0	0	0	0	0	2.3	4.21
C740138	0	0	0	3.37	0	4.6	0
C740148	0	0	2.62	0	0	0	0
C740152	2.23	0	5.23	3.37	0	2.3	2.11
C740166	0	0	0	0	0	0	0
C740168	0	0	0	3.37	0	0	0
C740198	0	0	2.62	0	6.24	0	4.21
C740208	0	0	0	0	3.12	0	0
C740210	0	0	0	0	0	0	4.21
C740214	0	0	0	0	0	0	0
C740216	0	0	0	0	0	6.89	0
C740220	0	0	0	0	0	0	0
C740244	2.23	0	0	0	0	0	0
C740256	0	2.25	0	0	0	0	2.11
C740258	0	0	0	0	0	6.89	0
C740276	4.45	0	0	0	6.24	0	0
C740290	0	0	0	0	0	2.3	2.11
C740300	0	2.25	0	0	0	0	2.11
C740306	0	0	0	0	9.36	0	6.32
C740312	0	0	2.62	0	0	0	0
C740314	0	0	0	0	0	0	0
C740328	0	0	0	0	0	6.89	0
C740330	0	0	0	0	0	0	2.11
C740340	2.23	0	0	0	0	2.3	0
C740358	0	0	2.62	0	0	0	0
C740368	2.23	2.25	0	0	3.12	0	0
C740386	0	0	0	0	0	0	0
C740390	0	0	0	0	0	2.3	0
C740392	0	0	0	0	0	0	2.11
C740394	2.23	0	0	0	0	0	2.11
C740396	0	0	0	3.37	3.12	0	0
C740398	0	2.25	5.23	0	3.12	0	2.11
C740400	0	0	0	0	6.24	0	0
C740416	0	0	0	0	0	0	0
C740426	0	0	0	6.75	0	0	0
C740430	0	0	2.62	0	0	4.6	0
C740440	0	0	2.62	6.75	3.12	2.3	0
C740442	2.23	0	0	0	0	0	0
C740464	2.23	0	0	10.12	3.12	0	0
C740466	0	0	0	0	0	4.6	0
C740472	0	0	0	0	0	0	2.11
C740476	0	0	0	0	0	0	0
C740486	0	0	0	0	0	0	0
C740492	0	4.49	0	0	0	0	0
C740496	6.68	0	0	0	0	0	0
C740498	0	0	0	10.12	0	0	0
C740504	4.45	6.74	7.85	0	3.12	0	0
C740512	6.68	0	0	6.75	3.12	0	2.11
C740516	0	0	0	0	0	0	0
C740532	0	0	0	3.37	3.12	0	0
C740542	0	0	0	3.37	6.24	6.89	2.11
C740552	0	0	2.62	0	0	0	2.11
C740564	0	0	0	3.37	3.12	2.3	0
C740572	0	0	2.62	0	0	0	2.11
C740586	8.9	6.74	5.23	6.75	6.24	6.89	0
C740590	0	0	0	0	0	0	2.11
C740592	0	0	0	0	0	2.3	0
C740594	2.23	0	0	0	0	0	0
C740602	0	2.25	0	0	0	2.3	2.11
C740604	0	0	0	0	0	0	0
C740628	0	4.49	2.62	0	0	0	0
C740632	0	0	0	0	3.12	0	0
C740644	2.23	2.25	10.47	16.86	31.21	0	2.11
C740660	0	0	0	0	0	2.3	2.11
C740662	0	2.25	0	0	3.12	0	0
C740676	0	0	0	3.37	0	0	0
C740680	0	0	0	3.37	0	2.3	0
C740686	0	0	5.23	0	0	0	0
C740690	0	0	0	0	3.12	4.6	0
C740696	4.45	0	0	0	0	0	0
C740702	0	2.25	0	0	0	0	0
C740714	0	0	2.62	0	0	0	2.11
C740716	0	0	0	3.37	0	0	0
C740726	2.23	0	0	0	0	0	0
C740728	0	0	0	3.37	6.24	6.89	2.11
C740748	0	0	0	0	6.24	0	0
C740754	2.23	0	0	3.37	0	2.3	0
C740764	0	0	0	0	0	0	4.21
C740776	0	0	0	6.75	0	4.6	6.32
C740780	0	0	2.62	3.37	0	0	0
C740788	0	0	0	0	0	6.89	0
C740792	0	0	0	0	3.12	0	0
C740804	0	2.25	0	0	0	2.3	0
C740808	4.45	4.49	0	0	0	0	0
C740830	0	0	2.62	0	0	0	0
C740832	0	0	0	6.75	6.24	0	0
C740854	0	0	0	0	6.24	0	0
C740858	0	0	0	6.75	6.24	0	2.11
C740870	0	2.25	0	3.37	3.12	0	0
C740888	0	0	0	0	0	2.3	0
C740892	0	4.49	0	0	0	0	6.32
C740902	0	0	2.62	3.37	0	2.3	2.11
C740908	0	4.49	0	0	0	0	0
C740916	0	0	0	0	3.12	0	0
C740920	0	0	0	0	0	0	0
C740930	0	0	0	0	0	0	2.11
C740934	0	0	0	0	0	2.3	0
C740940	4.45	2.25	0	0	0	0	0
C740948	0	2.25	0	0	3.12	2.3	10.53
C740954	0	0	2.62	0	0	0	2.11
C740962	0	0	0	0	3.12	2.3	0
C740964	0	0	0	0	0	0	0
C740976	2.23	0	0	0	0	0	2.11
C740984	0	2.25	0	0	0	2.3	0
C740994	0	0	0	3.37	0	2.3	0
C740996	0	0	0	0	0	0	2.11
C740998	0	0	0	3.37	0	2.3	0
C741006	2.23	4.49	0	0	0	0	0
C741008	0	0	0	0	9.36	0	0
C741022	0	0	0	0	6.24	0	2.11
C741026	0	0	2.62	0	0	6.89	2.11
C741028	0	0	0	0	0	4.6	2.11
C741032	0	0	0	0	12.48	2.3	0
C741044	0	0	0	0	0	0	0
C741048	0	0	2.62	0	0	0	2.11
C741062	2.23	2.25	0	0	0	0	0
C741070	2.23	0	0	0	0	0	0
C741080	0	0	0	0	3.12	0	0
C741084	0	0	0	0	3.12	0	0
C741094	0	0	0	0	3.12	4.6	0
C741100	0	0	2.62	3.37	0	0	4.21
C741120	0	0	0	0	0	0	6.32
C741124	0	0	0	0	0	0	0
C741134	4.45	0	2.62	0	0	0	0
C741136	0	0	0	3.37	0	0	0
C741140	0	0	0	0	0	2.26	0
C741150	0	0	0	3.31	0	0	0
C741164	0	0	0	0	6.13	0	0
C741166	0	0	0	0	0	0	0
C741192	0	0	0	0	0	0	0
C741198	0	0	0	0	0	0	2.07
C741204	0	0	0	3.31	0	0	0
C741208	0	0	0	0	0	0	0
C741220	0	0	0	0	0	2.26	0
C741222	13.11	4.41	10.28	0	0	2.26	8.28
C741224	2.19	0	2.57	0	3.07	0	0
C741226	0	0	0	0	0	2.26	0
C741228	0	0	10.28	3.31	3.07	0	0
C741230	45.9	46.28	17.99	16.57	12.27	22.59	16.56
C741238	0	0	0	0	0	0	0
C741250	0	0	0	3.31	0	0	0
C741258	0	0	0	0	0	0	0
C741284	0	0	0	0	0	2.26	0
C741306	0	0	0	0	0	0	0
C741312	0	2.2	0	0	0	0	2.07
C741316	2.19	6.61	10.28	16.57	21.47	4.52	14.49
C741328	0	2.2	0	0	0	0	2.07
C741332	0	0	0	0	0	0	2.07
C741336	0	6.61	0	0	0	0	0
C741342	0	0	0	0	0	0	0
C741346	0	0	0	0	3.07	0	0
C741356	0	0	2.57	0	0	2.26	0
C741364	0	0	0	0	0	0	0
C741374	0	0	0	0	0	0	2.07
C741394	0	0	0	3.31	6.13	0	0
C741396	0	0	0	0	0	0	0
C741402	0	0	0	0	3.07	0	0
C741412	2.19	2.2	0	3.31	0	2.26	0
C741420	0	0	0	0	0	0	2.07
C741422	0	0	2.57	6.63	0	0	0
C741438	0	0	0	0	3.07	0	2.07
C741470	2.19	0	2.57	0	0	6.78	2.07
C741476	2.19	0	0	0	0	0	2.07
C741478	0	0	0	0	0	2.26	0
C741490	0	0	0	3.31	0	0	0
C741500	0	0	0	0	0	0	0
C741524	0	0	0	0	3.07	0	0
C741526	0	0	0	0	9.2	0	0
C741534	0	0	0	0	6.13	0	4.14
C741536	0	0	0	3.31	0	0	0
C741544	0	4.41	0	0	0	0	0
C741564	0	0	0	0	0	0	0
C741566	0	0	2.57	0	0	0	2.07
C741584	0	0	0	0	0	0	0
C741586	0	0	0	3.31	0	2.26	2.07
C741600	0	0	0	0	0	2.26	2.07
C741622	0	0	0	0	6.13	4.52	0
C741624	0	0	2.57	0	0	2.26	0
C741634	0	0	0	0	0	2.26	0
C741638	0	4.41	0	0	0	0	0
C741648	0	0	0	0	0	0	0
C741664	0	0	0	3.31	0	0	0
C741668	0	0	0	3.31	0	0	0
C741678	0	0	0	0	0	0	0
C741682	0	0	0	0	0	0	0
C741692	0	0	2.57	3.31	0	4.52	0
C741698	0	0	0	3.31	3.07	0	0
C741700	0	0	0	0	0	0	0
C741706	0	0	0	3.31	0	0	2.07
C741720	0	0	0	0	0	0	2.07
C741736	2.19	0	0	3.31	0	0	0
C741742	0	0	2.57	0	3.07	2.26	0
C741746	0	0	2.57	0	0	4.52	0
C741758	0	0	0	3.31	6.13	2.26	0
C741774	0	0	0	6.63	0	0	0
C741776	2.19	0	2.57	0	0	2.26	0
C741780	0	0	5.14	0	3.07	0	6.21
C741784	0	0	0	0	0	0	0
C741786	0	0	0	0	0	0	6.21
C741790	0	0	0	0	0	4.52	2.07
C741798	2.19	2.2	5.14	0	0	2.26	6.21
C741806	0	4.41	0	0	0	0	2.07
C741816	2.19	4.41	0	0	0	0	0
C741824	0	0	0	0	0	0	2.07
C741832	0	0	0	0	0	0	0
C741876	0	0	0	6.63	0	0	0
C741888	48.09	22.04	17.99	33.14	18.4	38.4	24.84
C741896	0	0	0	0	0	0	0
C741902	2.19	0	0	0	3.07	2.26	2.07
C741906	0	0	0	0	0	0	2.07
C741916	0	0	0	0	0	0	0
C741922	0	0	0	0	0	0	0
C741924	0	0	0	0	0	0	0
C741934	0	0	0	0	0	2.26	0
C741958	2.19	0	0	0	0	0	0
C741960	0	0	0	9.94	3.07	18.07	0
C741998	0	0	0	0	0	0	2.07
C742004	2.19	0	0	0	0	0	0
C742012	0	0	0	0	0	0	2.07
C742022	0	0	0	0	0	0	2.07
C742034	0	0	0	3.31	0	0	0
C742036	0	0	2.57	0	0	0	0
C742058	0	0	0	0	0	2.26	0
C742060	2.19	2.2	2.57	0	3.07	0	0
C742096	0	0	2.57	0	0	0	0
C742104	0	0	0	0	0	0	0
C742106	0	2.2	0	0	0	2.26	0
C742110	0	0	0	0	0	0	0
C742116	0	0	0	0	0	0	0
C742122	0	0	0	0	6.13	0	0
C742130	0	0	0	0	6.13	0	0
C742138	2.19	0	0	0	3.07	0	0
C742144	0	0	0	0	0	0	0
C742152	0	2.2	2.57	0	0	0	0
C742164	2.19	0	10.28	0	0	0	0
C742166	0	0	0	3.31	0	0	0
C742178	2.19	0	2.57	0	0	0	6.21
C742200	0	0	0	3.31	0	0	0
C742216	4.37	13.22	2.57	9.94	18.4	22.59	8.28
C742234	0	0	5.14	0	0	0	2.07
C742238	0	0	2.57	3.31	0	0	0
C742256	4.37	0	0	0	0	0	0
C742264	2.19	0	0	0	0	0	0
C742266	0	0	0	0	0	0	0
C742272	0	0	0	3.31	3.07	0	0
C742276	0	0	0	0	0	0	0
C742286	0	0	0	0	0	2.26	0
C742288	0	0	2.57	0	0	0	0
C742290	2.19	0	0	0	0	0	0
C742294	0	2.2	0	23.2	27.6	0	2.07
C742312	0	0	0	0	0	2.26	0
C742322	0	0	0	0	3.07	0	0
C742334	0	0	0	0	0	0	0
C742340	0	2.2	0	0	0	0	0
C742342	0	0	0	0	0	0	0
C742344	0	0	0	0	0	0	0
C742354	0	0	0	3.31	0	0	0
C742360	0	2.2	2.57	0	0	0	0
C742364	0	0	0	3.31	3.07	0	0
C742368	0	0	0	3.31	0	2.26	0
C742384	0	0	0	0	0	2.26	0
C742392	0	0	0	0	6.13	0	0
C742398	0	0	0	0	0	4.52	2.07
C742426	0	2.2	2.57	0	0	0	2.07
C742428	2.19	2.2	0	0	0	0	2.07
C742442	0	4.41	0	0	0	0	0
C742444	0	0	0	3.31	0	2.26	0
C742446	0	0	0	0	0	6.78	0
C742450	0	0	0	0	0	0	2.07
C742452	6.56	0	2.57	0	0	0	0
C742468	2.19	11.02	17.99	3.31	18.4	0	14.49
C742484	2.19	0	0	3.31	0	0	0
C742502	0	0	0	0	3.07	0	0
C742520	0	0	0	0	0	4.52	0
C742526	4.37	0	0	0	0	0	0
C742570	0	0	0	3.26	0	0	0
C742588	0	0	2.53	0	0	4.44	2.03
C742592	0	0	2.53	0	6.03	0	2.03
C742622	0	0	0	0	6.03	0	0
C742630	0	0	0	3.26	0	0	0
C742632	0	0	2.53	0	0	0	0
C742648	2.15	0	0	0	0	0	0
C742650	0	0	2.53	0	0	0	0
C742652	2.15	0	0	0	0	0	2.03
C742682	0	0	0	3.26	3.01	2.22	0
C742716	0	0	0	0	12.06	0	0
C742742	0	0	0	0	0	2.22	2.03
C742744	2.15	0	0	0	0	0	0
C742750	0	2.16	5.05	0	0	0	0
C742752	0	0	2.53	6.51	0	0	0
C742754	0	0	0	0	6.03	0	0
C742764	0	0	0	0	3.01	0	0
C742766	0	0	2.53	0	0	0	0
C742774	0	0	0	0	0	0	0
C742788	0	0	0	0	0	0	2.03
C742794	0	0	0	0	0	2.22	0
C742804	0	0	0	0	0	0	0
C742808	0	0	0	0	0	2.22	0
C742814	0	0	0	3.26	0	2.22	0
C742834	0	0	0	0	0	0	2.03
C742838	0	0	0	0	0	2.22	0
C742848	2.15	0	0	0	0	0	0
C742858	0	0	0	0	3.01	2.22	0
C742862	0	0	0	0	0	0	4.07
C742872	0	2.16	0	0	0	0	0
C742884	0	0	0	0	0	0	0
C742898	0	0	2.53	0	0	0	0
C742914	2.15	0	0	0	0	0	0
C742918	2.15	0	2.53	0	0	0	8.14
C742922	0	0	2.53	0	3.01	2.22	2.03
C742928	0	0	0	0	0	0	0
C742931	0	0	0	0	6.03	0	0
C742949	0	0	0	0	0	0	2.03
C743001	0	0	0	0	0	0	0
C743009	0	0	0	0	0	0	0
C743031	2.15	0	5.05	0	0	0	0
C743093	0	0	0	0	0	0	0
C743095	0	2.16	0	0	0	0	0
C743097	0	0	0	0	0	0	2.03
C743107	0	0	0	0	0	2.22	0
C743111	0	0	0	0	0	4.44	0
C743115	0	2.16	0	0	0	0	2.03
C743125	2.15	0	0	0	3.01	0	0
C743143	6.44	2.16	2.53	0	0	0	4.07
C743173	0	0	0	3.26	6.03	0	0
C743191	0	0	0	0	0	0	0
C743195	4.29	0	0	6.51	0	0	0
C743203	0	0	0	3.26	3.01	0	0
C743205	0	0	2.53	0	0	0	0
C743215	2.15	0	0	0	0	0	0
C743221	0	0	0	3.26	0	2.22	0
C743225	0	0	0	0	0	0	0
C743235	0	0	0	0	3.01	0	0
C743253	4.29	0	0	0	0	4.44	4.07
C743267	64.42	177.4	40.4	6.51	27.13	8.88	40.68
C743273	0	0	0	0	0	0	2.03
C743301	0	0	0	0	0	0	0
C743315	0	0	0	0	0	0	0
C743343	0	0	0	0	0	0	0
C743363	0	2.16	12.63	3.26	24.12	4.44	8.14
C743365	2.15	0	0	0	0	0	0
C743371	0	2.16	2.53	0	0	2.22	4.07
C743375	0	0	0	0	0	0	0
C743379	0	2.16	0	0	0	0	0
C743381	0	0	0	3.26	3.01	0	0
C743387	0	0	0	6.51	6.03	0	0
C743389	0	2.16	0	0	0	0	0
C743411	0	0	0	0	3.01	0	0
C743413	0	0	0	0	0	0	0
C743447	0	0	0	3.26	6.03	0	0
C743477	0	2.16	0	0	0	0	0
C743481	0	2.16	0	0	0	0	2.03
C743493	2.15	4.33	2.53	0	0	0	4.07
C743495	0	0	0	0	0	0	0
C743499	0	0	0	0	0	0	2.03
C743517	0	0	2.53	0	0	2.22	4.07
C743531	4.29	0	0	0	0	4.44	0
C743535	2.15	0	2.53	3.26	0	0	0
C743559	0	0	2.53	0	0	2.22	2.03
C743579	0	0	0	0	6.03	0	0
C743599	0	0	2.53	0	0	0	0
C743605	2.15	0	0	0	0	0	0
C743611	0	0	0	3.26	0	0	0
C743621	0	2.16	0	0	0	0	0
C743625	0	0	2.53	0	0	0	0
C743635	0	0	0	0	3.01	0	0
C743639	0	0	0	0	0	2.22	0
C743651	0	0	0	3.26	0	0	0
C743661	0	0	0	0	3.01	0	2.03
C743667	0	4.33	5.05	6.51	3.01	0	4.07
C743671	0	0	0	0	0	0	0
C743673	0	0	0	0	0	2.22	2.03
C743677	0	0	2.53	3.26	0	2.22	0
C743705	0	2.16	0	0	0	2.22	0
C743717	0	0	0	6.51	9.04	0	0
C743727	0	0	0	3.26	6.03	0	0
C743731	0	0	0	0	3.01	0	0
C743733	0	0	2.53	0	0	2.22	2.03
C743739	0	0	2.53	0	0	0	0
C743741	0	2.16	2.53	3.26	0	0	0
C743755	0	4.33	0	0	0	0	0
C743769	0	0	2.53	0	0	0	2.03
C743771	0	0	0	0	0	0	0
C743775	0	0	0	0	0	0	2.03
C743831	0	0	0	0	0	0	0
C743857	0	0	0	0	0	2.22	0
C743865	0	0	2.53	3.26	0	0	0
C743867	8.59	0	5.05	3.26	9.04	0	14.24
C743869	0	0	0	0	0	0	0
C743871	2.15	2.16	0	0	3.01	2.22	0
C743899	4.29	2.16	7.58	0	0	2.22	4.07
C743905	0	0	0	0	9.04	0	0
C743909	0	0	0	0	6.03	0	0
C743917	0	0	0	0	3.01	0	0
C743923	0	2.12	0	0	0	0	0
C743943	0	0	0	0	0	2.18	0
C743945	37.98	21.25	14.89	0	5.93	0	34
C743953	0	4.25	0	0	0	0	0
C743965	0	0	0	0	0	0	0
C743971	0	0	0	0	0	4.37	0
C743979	2.11	0	0	0	0	0	0
C743993	2.11	2.12	2.48	0	0	2.18	2
C744001	0	0	2.48	0	0	0	2
C744011	0	0	0	3.2	0	0	0
C744013	0	0	0	0	0	0	0
C744029	0	0	0	0	0	0	0
C744039	2.11	0	0	0	2.96	0	0
C744059	0	6.37	0	0	0	0	0
C744061	0	2.12	0	0	0	0	0
C744071	0	0	0	0	0	0	4
C744077	0	0	0	0	0	0	0
C744079	2.11	0	0	0	0	0	2
C744085	0	0	0	3.2	14.82	0	0
C744091	0	0	0	0	0	4.37	0
C744095	0	0	2.48	0	0	0	2
C744099	0	0	0	3.2	2.96	2.18	0
C744101	0	2.12	0	3.2	2.96	0	0
C744125	0	0	0	0	8.89	0	0
C744127	0	2.12	0	0	0	0	0
C744131	0	0	0	0	5.93	0	0
C744139	0	0	0	3.2	2.96	2.18	4
C744141	0	0	0	0	0	0	0
C744147	0	0	0	0	0	0	0
C744159	0	0	0	3.2	0	0	0
C744205	0	0	0	0	0	0	0
C744229	0	0	0	3.2	0	0	0
C744243	0	0	0	9.6	2.96	0	0
C744259	0	0	0	0	2.96	0	0
C744289	2.11	4.25	0	0	0	0	4
C744291	0	0	2.48	0	0	6.55	0
C744303	0	0	0	3.2	0	0	0
C744305	4.22	0	4.96	3.2	2.96	6.55	4
C744309	0	0	0	0	5.93	0	0
C744315	0	0	0	0	0	2.18	0
C744321	0	0	0	0	2.96	0	0
C744331	0	0	0	0	2.96	0	0
C744347	0	0	0	6.4	0	4.37	0
C744351	0	0	0	3.2	0	0	0
C744383	2.11	6.37	0	0	0	0	2
C744395	0	0	0	6.4	5.93	0	0
C744409	2.11	0	0	0	0	0	0
C744413	0	0	0	0	0	0	0
C744429	0	0	0	6.4	0	2.18	2
C744431	0	0	0	3.2	2.96	0	0
C744433	4.22	0	0	0	0	0	2
C744435	0	0	0	0	0	0	0
C744445	0	0	0	3.2	0	0	0
C744469	0	0	0	0	0	0	0
C744499	0	0	0	0	0	0	0
C744523	0	0	0	0	0	0	2
C744535	0	0	0	0	2.96	0	2
C744537	0	0	0	0	0	0	0
C744549	2.11	0	0	3.2	0	0	0
C744553	0	0	0	0	0	0	0
C744561	0	0	0	0	0	6.55	0
C744573	0	0	0	3.2	0	2.18	0
C744577	0	0	0	3.2	0	0	0
C744579	0	0	0	0	0	2.18	0
C744583	0	0	0	0	0	2.18	0
C744587	0	0	0	0	2.96	0	2
C744595	0	0	0	0	0	0	0
C744603	2.11	0	0	0	2.96	0	0
C744613	2.11	8.5	7.44	6.4	20.75	10.92	2
C744617	0	0	0	0	0	2.18	0
C744623	0	0	2.48	0	0	0	0
C744635	2.11	0	0	0	0	0	0
C744663	2.11	0	2.48	0	0	6.55	0
C744667	0	2.12	0	0	0	0	0
C744685	0	0	2.48	0	0	0	0
C744693	0	0	0	3.2	0	0	2
C744697	2.11	0	0	3.2	0	0	0
C744699	0	4.25	0	0	0	2.18	0
C744701	0	0	2.48	0	0	0	2
C744713	0	0	0	0	5.93	0	0
C744741	0	0	0	0	0	0	0
C744753	0	0	0	0	0	0	0
C744759	2.11	0	0	0	0	0	0
C744767	0	0	0	3.2	0	0	0
C744769	2.11	2.12	0	0	0	0	0
C744771	0	0	0	0	0	0	0
C744779	0	2.12	2.48	0	0	0	0
C744789	0	0	0	0	0	0	4
C744803	0	2.12	2.48	0	5.93	0	0
C744809	0	2.12	2.48	0	0	0	0
C744811	0	0	0	0	0	6.55	0
C744825	0	0	0	0	2.96	0	0
C744829	0	0	2.48	0	0	0	2
C744833	0	0	0	0	0	0	0
C744837	0	0	2.48	0	0	0	2
C744841	4.22	2.12	14.89	9.6	0	2.18	4
C744845	0	0	2.48	0	0	0	0
C744849	0	0	0	0	0	0	2
C744851	0	0	0	0	2.96	0	0
C744875	4.22	0	0	0	0	0	0
C744877	0	0	0	0	0	0	0
C744879	0	2.12	0	0	0	0	2
C744881	0	2.12	0	0	0	0	2
C744889	0	0	0	0	8.89	0	0
C744903	0	2.12	0	0	0	2.18	0
C744907	0	0	0	0	0	0	2
C744911	0	2.12	0	0	0	0	0
C744925	2.11	0	2.48	0	0	0	0
C744929	0	4.25	0	0	0	0	0
C744941	0	0	0	0	0	0	0
C744943	0	0	2.48	0	0	0	0
C744947	0	0	0	0	0	0	2
C744951	0	0	0	3.2	0	0	0
C744955	2.11	4.25	2.48	3.2	8.89	4.37	4
C744957	0	0	0	0	0	0	0
C744975	0	0	0	0	0	0	0
C744983	0	0	2.48	0	0	0	0
C744997	0	0	0	0	0	0	0
C745027	0	0	0	3.2	2.96	0	0
C745029	2.11	2.12	0	0	0	0	0
C745031	0	0	0	0	2.96	2.18	0
C745033	0	0	0	6.4	0	0	0
C745041	0	0	0	0	0	0	0
C745043	2.11	0	7.44	0	0	0	0
C745055	0	2.12	0	0	0	0	2
C745063	0	0	0	0	2.96	2.18	0
C745075	0	0	2.48	3.2	0	0	0
C745083	0	0	0	0	0	0	0
C745085	0	0	2.48	0	2.96	0	0
C745093	0	2.12	0	0	0	0	2
C745099	0	2.12	2.48	3.2	0	0	2
C745131	0	0	0	0	0	0	0
C745139	0	0	0	0	0	4.37	0
C745145	0	0	0	3.2	0	0	0
C745159	0	2.12	0	0	0	0	2
C745161	4.22	0	0	0	2.96	0	0
C745173	0	0	0	3.2	2.96	0	0
C745179	0	0	0	0	0	0	0
C745181	0	0	2.48	0	0	0	2
C745191	0	0	0	0	0	0	2
C745205	2.11	0	4.96	0	0	0	4
C745207	6.22	0	2.44	0	0	4.3	5.9
C745215	0	0	0	0	0	0	0
C745233	0	0	0	3.15	0	0	0
C745239	0	0	0	0	0	2.15	1.97
C745253	0	0	0	0	0	0	0
C745259	0	4.17	0	0	0	0	0
C745275	0	0	0	0	2.92	0	0
C745281	0	0	0	3.15	0	0	0
C745329	0	0	0	0	0	0	0
C745331	2.07	2.09	0	0	0	0	0
C745353	0	0	0	3.15	0	0	3.93
C745355	0	0	0	0	0	0	0
C745367	0	0	2.44	0	0	0	1.97
C745369	0	0	0	3.15	5.83	0	0
C745375	0	0	0	9.44	0	0	0
C745379	2.07	4.17	4.88	3.15	0	0	13.77
C745385	2.07	0	0	0	0	0	1.97
C745391	2.07	0	2.44	0	0	0	0
C745401	0	0	0	0	5.83	0	0
C745407	0	0	0	3.15	8.75	4.3	0
C745413	0	0	0	0	0	0	0
C745415	0	0	0	0	0	0	0
C745425	2.07	0	0	0	0	2.15	0
C745433	0	0	0	0	0	0	0
C745463	0	2.09	0	0	0	0	1.97
C745475	2.07	0	0	0	0	0	0
C745479	0	0	0	0	0	2.15	0
C745497	2.07	0	0	0	0	2.15	0
C745511	0	0	0	0	2.92	0	0
C745523	2.07	0	0	0	0	0	1.97
C745527	0	0	2.44	0	0	0	0
C745535	0	0	0	0	0	2.15	1.97
C745537	0	0	0	3.15	0	0	1.97
C745543	0	0	0	0	0	0	0
C745547	0	0	0	0	0	0	0
C745557	49.77	181.55	146.33	188.85	186.56	118.13	84.56
C745593	0	0	0	3.15	5.83	0	0
C745603	0	0	0	0	0	0	0
C745605	0	0	0	3.15	2.92	2.15	1.97
C745607	0	0	0	0	0	0	0
C745611	0	0	0	6.3	14.58	0	0
C745617	0	0	0	0	0	2.15	0
[truncated: 224,253+ more rows]
