# Supplementary material for: Gene-Metabolite Network Analysis Revealed Tissue-Specific Accumulation of Therapeutic Metabolites in Mallotus japonicus
Source: Int J Mol Sci. 2021 Aug 17;22(16):8835. doi: 10.3390/ijms22168835 (PMC8396295; doi:10.3390/ijms22168835)
Supplement: Supplementary file 1 [file ijms-22-08835-s001.zip › Supplementary_Table S10_Transcripts_used_for_WGCNA_analysis with legend_Megha.xlsx]

## Sheet: Final_list_used_for_WGCNA
Table S10 Highly expressed transcripts of Mallotus japonicus used for WCNA analysis.
Sequence name	FPKM_Young_Leaf	FPKM_Mature_Leaf	FPKM_Young_Stem	FPKM_Mature_Stem	FPKM_Bark	FPKM_Central_Cylinder	FPKM_Inflorescence	Desc	Hits
Mj_1_GCCAAT_L005_R1_001_(paired)_trimmed_(paired)_contig_12934	3.21	1.84	1.7	3.56	2.16	6.58	2.53	sucrose phosphate synthase	gi|9945034|gb|AAG01888.1|sucrose phosphate synthase [Ipomoea batatas]
TR64204|c0_g1_i2	0	0	0	10.36	12.45	0.1	0	opsin-1	gi|9858875|gb|AAG01180.1|AF290180_1opsin [Leptosphaeria maculans] gi|282892265|gb|ADB03112.1| Mac [synthetic construct]
TR68047|c0_g1_i7	7.56	7	3.98	2.01	3.89	3.55	5.24	patatin group a-3-like	gi|9794870|gb|AAF98369.1|AF158253_1patatin-like protein 3 [Nicotiana tabacum]
TR44976|c0_g1_i1	15.17	11.72	2.29	0.62	2.61	0.43	3.06	protein	gi|9759602|dbj|BAB11390.1|unnamed protein product [Arabidopsis thaliana]
TR66678|c0_g1_i2	3.05	2.97	7.51	4.24	3.42	3.65	4.81	udp-n-acetylglucosamine pyrophosphorylase	gi|9755397|gb|AAF98204.1|AC000107_27F17F8.1 [Arabidopsis thaliana]
TR66678|c0_g1_i5	3.2	4.06	6.58	3.61	3.8	2.53	5.53	udp-n-acetylglucosamine pyrophosphorylase	gi|9755397|gb|AAF98204.1|AC000107_27F17F8.1 [Arabidopsis thaliana]
TR66678|c0_g1_i9	2.42	2.89	5.41	3.62	1.87	2.92	4.39	udp-n-acetylglucosamine pyrophosphorylase	gi|9755397|gb|AAF98204.1|AC000107_27F17F8.1 [Arabidopsis thaliana]
C956916	15.63	9.8	22.76	11.29	16.5	12.71	0	mads-box protein	gi|95103172|gb|ABF51526.1|MADS box transcription factor [Populus tomentosa]
TR53854|c0_g1_i1	17.04	9.09	21.98	12.55	12.95	15.05	0.12	mads-box protein	gi|95103172|gb|ABF51526.1|MADS box transcription factor [Populus tomentosa]
TR61501|c1_g1_i1	59.37	39.46	27.56	21.22	20.47	23.75	43.83	translocon tic40	gi|94449066|gb|ABF19057.1|plastid Tic40 [Ricinus communis]
TR77895|c1_g1_i1	2.21	1.97	1.27	44.92	19.85	11.65	10.96	riboflavin biosynthesis protein chloroplastic-like	gi|940383|dbj|BAA08113.1|GTP cyclohydrolase II [Arabidopsis thaliana]
TR50929|c1_g1_i1	0	0	0	4.83	12.35	2.17	0	alpha- partial	gi|9188543|dbj|BAA99561.1|alpha-tubulin [Chlorella vulgaris]
TR50244|c0_g1_i1	9.89	18.29	9.21	0.36	0.34	0.25	14.71	copper-zinc superoxide dismutase partial	gi|90823174|gb|ABE01089.1|putative cytosolic copper/zinc superoxide dismutase [Gossypium hirsutum]
TR64340|c2_g3_i4	0	0	0	6.46	10.14	0.19	0	aldehyde dehydrogenase	gi|9082283|gb|AAF82789.1|AF275347_1aldehyde dehydrogenase [Passalora fulva]
TR77310|c2_g3_i1	0	0	0	24.73	36.97	0.36	0.06	aldehyde dehydrogenase	gi|9082283|gb|AAF82789.1|AF275347_1aldehyde dehydrogenase [Passalora fulva]
TR77310|c2_g3_i12	0	0	0	21.46	43.35	0.43	0.13	aldehyde dehydrogenase	gi|9082283|gb|AAF82789.1|AF275347_1aldehyde dehydrogenase [Passalora fulva]
TR77310|c2_g3_i7	0	0	0	11.14	32.27	0.62	0.28	acetaldehyde dehydrogenase	gi|9082283|gb|AAF82789.1|AF275347_1aldehyde dehydrogenase [Passalora fulva]
TR79292|c3_g4_i2	0	0	0	8.05	18.19	0	0	aldehyde dehydrogenase	gi|9082283|gb|AAF82789.1|AF275347_1aldehyde dehydrogenase [Passalora fulva]
TR79292|c3_g4_i5	0	0	0	6.66	22.63	0.26	0	aldehyde dehydrogenase	gi|9082283|gb|AAF82789.1|AF275347_1aldehyde dehydrogenase [Passalora fulva]
C904749	0	0	0	1.4	6.15	0	0	alcohol oxidase	gi|9082281|gb|AAF82788.1|AF275346_1alcohol oxidase [Passalora fulva]
C943636	0	0	0	1.18	5.13	0	0	alcohol oxidase	gi|9082281|gb|AAF82788.1|AF275346_1alcohol oxidase [Passalora fulva]
Mj_1_GCCAAT_L005_R1_001_(paired)_trimmed_(paired)_contig_48499	0.05	0	0	7.58	11.15	0.16	0	alcohol oxidase	gi|9082281|gb|AAF82788.1|AF275346_1alcohol oxidase [Passalora fulva]
TR40445|c0_g1_i1	0	0	0	2.54	5.05	0	0	alcohol oxidase	gi|9082281|gb|AAF82788.1|AF275346_1alcohol oxidase [Passalora fulva]
TR74647|c1_g1_i1	0	0	0	7.17	9.44	0.21	0	alcohol oxidase	gi|9082281|gb|AAF82788.1|AF275346_1alcohol oxidase [Passalora fulva]
TR67372|c0_g1_i1	115.72	11.58	233.43	376.79	216.47	166.61	159.91	sucrose synthase 1	gi|90655945|gb|ABD96570.1|sucrose synthase [Manihot esculenta]
TR42593|c0_g2_i1	21.41	22.8	17.37	20.32	25.14	20.77	24.34	small gtpase	gi|90101445|sp|Q6EP31.2|RAC5_ORYSJRecName: Full=Rac-like GTP-binding protein 5; AltName: Full=GTPase protein RacD; AltName: Full=OsRac5; Flags: Precursor gi|6822324|gb|AAF28764.1|AF218381_1 small GTP binding protein RACDP [Oryza sativa Japonica Group] gi|13487163|gb|AAK27450.1|AF329814_1 small GTP binding protein RACDP [Oryza sativa Japonica Group] gi|50251425|dbj|BAD28463.1| putative RacD protei…
Mj_1_GCCAAT_L005_R1_001_(paired)_trimmed_(paired)_contig_488	141.59	69.08	129.73	177.24	101.82	122.23	83.24	beta tubulin	gi|8928412|sp|Q40106.1|TBB2_LUPALRecName: Full=Tubulin beta-2 chain; AltName: Full=Beta-2-tubulin gi|1399450|gb|AAB03267.1| beta-tubulin 2 [Lupinus albus]
TR55766|c0_g1_i2	37.63	28.17	61.66	73.11	75.34	72.94	53.07	protein	gi|89258500|gb|ABD65463.1|DNA binding/zinc ion binding protein [Gossypium hirsutum]
TR74368|c0_g1_i2	4.67	2.18	1.93	4.37	5.75	4.87	1.96	t7 bacteriophage-type single subunit rna polymerase	gi|88933966|sp|Q8L6J3.2|RPO2B_TOBACRecName: Full=DNA-directed RNA polymerase 2B, chloroplastic/mitochondrial; AltName: Full=NictaRpoT2-tom; AltName: Full=T7 bacteriophage-type single subunit RNA polymerase 2B; Flags: Precursor gi|21425665|emb|CAC95020.1| mitochondrial and chloroplast RNA polymerase [Nicotiana tabacum]
TR77045|c3_g1_i6	3.82	2.62	5.06	5.7	8.59	6.91	2.48	dna-directed rna polymerase chloroplast mitochondrial	gi|88933964|sp|Q8L6J4.2|RPO1A_TOBACRecName: Full=DNA-directed RNA polymerase 1A; AltName: Full=NictaRpoT1-syl; AltName: Full=T7 bacteriophage-type single subunit RNA polymerase 1A
TR70889|c1_g1_i1	3.71	3.92	5.24	4.2	2.23	2.3	4.64	diacylglycerol acyltransferase	gi|86279632|gb|ABC94471.1|type 1 diacylglycerol acyltransferase [Vernicia fordii] gi|86279634|gb|ABC94472.1| type 1 diacylglycerol acyltransferase [Vernicia fordii]
Mj_1_GCCAAT_L005_R1_001_(paired)_trimmed_(paired)_contig_100032	0	0	0	0.14	6.81	0	0	p-type atpase	gi|85109074|ref|XP_962732.1|hypothetical protein NCU07649 [Neurospora crassa OR74A] gi|28924355|gb|EAA33496.1| predicted protein [Neurospora crassa OR74A] gi|336470466|gb|EGO58627.1| hypothetical protein NEUTE1DRAFT_77999 [Neurospora tetrasperma FGSC 2508] gi|350291510|gb|EGZ72705.1| hypothetical protein NEUTE2DRAFT_106553 [Neurospora tetrasperma FGSC 2509]
TR76360|c0_g1_i1	3.2	8.02	4.08	0.42	3	0.44	4.74	myb-like protein	gi|84181140|gb|ABC54979.1|MYB-like protein [Vitis vinifera]
Mj_1_GCCAAT_L005_R1_001_(paired)_trimmed_(paired)_contig_5617	3.5	2.94	2.11	4.04	5.09	4.04	4.7	acyl- synthetase	gi|83320527|gb|ABC02882.1|ACS4 [Ricinus communis]
Mj_1_GCCAAT_L005_R1_001_(paired)_trimmed_(paired)_contig_99	93.43	57.39	98.82	84.72	93.38	71.69	79.89	protein	gi|82623405|gb|ABB87117.1|unknown [Solanum tuberosum]
TR55932|c0_g1_i2	88.86	56.17	96.56	81.19	82.49	60.22	71.99	protein	gi|82623405|gb|ABB87117.1|unknown [Solanum tuberosum]
scaffold12032	95.09	53.91	105.05	106.95	88.43	86.89	72.84	40s ribosomal protein s13	gi|82621170|gb|ABB86273.1|cytoplasmic ribosomal protein S13-like [Solanum tuberosum]
TR76707|c3_g1_i1	2.95	2.26	1.86	5.49	4.1	4.57	3.27	ubiquitin-conjugating enzyme e2 33	gi|79330462|ref|NP_001032049.1|putative ubiquitin-conjugating enzyme E2 33 [Arabidopsis thaliana] gi|332008562|gb|AED95945.1| putative ubiquitin-conjugating enzyme E2 33 [Arabidopsis thaliana]
TR71229|c1_g2_i2	3.41	4.28	7.27	6.74	6.66	4.24	4.19	aminoalcoholphosphotransferase	gi|79313441|ref|NP_001030766.1|aminoalcoholphosphotransferase [Arabidopsis thaliana] gi|332643516|gb|AEE77037.1| aminoalcoholphosphotransferase [Arabidopsis thaliana]
Mj_1_GCCAAT_L005_R1_001_(paired)_trimmed_(paired)_contig_84	156.09	168.9	134.79	23.57	27.66	5.3	73.71	flavonoid 3 -hydroxylase	gi|78183422|dbj|BAE47005.1|flavonoid 3'-hydroxylase [Vitis vinifera]
TR61599|c3_g3_i2	0	0.26	0.95	1.7	7.59	0.3	0	conserved protein	gi|78033430|emb|CAJ30045.1|conserved hypothetical protein [Magnetospirillum gryphiswaldense MSR-1]
Mj_1_GCCAAT_L005_R1_001_(paired)_trimmed_(paired)_contig_37070	0.67	0.43	0.79	3.43	4.45	8.97	0.58	putative protein	gi|7801683|emb|CAB91603.1|putative protein [Arabidopsis thaliana]
TR27507|c0_g1_i1	0	0	0	2.51	5.79	1.95	0	serine hydroxymethyltransferase	gi|77550705|gb|ABA93502.1|Serine hydroxymethyltransferase, mitochondrial precursor, putative, expressed [Oryza sativa Japonica Group] gi|215701123|dbj|BAG92547.1| unnamed protein product [Oryza sativa Japonica Group] gi|215715319|dbj|BAG95070.1| unnamed protein product [Oryza sativa Japonica Group] gi|215740988|dbj|BAG97483.1| unnamed protein product [Oryza sativa Japonica Group]
Mj_1_GCCAAT_L005_R1_001_(paired)_trimmed_(paired)_contig_45970	0.65	2.02	0	0.52	12.39	0.36	0.16	ribulose- -bisphosphate carboxylase oxygenase small subunit	gi|77157637|dbj|BAE46384.1|ribulose-1,5-bisphosphate carboxylase/oxygenase small subunit [Panax ginseng]
TR63373|c0_g1_i3	3.12	2.4	3.95	5.72	3.59	3.87	6.03	shikimate kinase	gi|76782196|gb|ABA54868.1|putative shikimate kinase [Fagus sylvatica]
scaffold14221	5.79	5.04	7.88	6.84	6.82	7.92	8.98	mitogen-activated protein kinase	gi|7649153|gb|AAF65766.1|AF242308_1mitogen-activated protein kinase [Euphorbia esula]
TR48846|c0_g1_i1	0.13	0	0	0	0	0	95.84	agamous-like protein	gi|76152076|gb|ABA39727.1|AGAMOUS-like protein [Theobroma cacao]
TR79230|c1_g1_i7	4.72	4.38	5.19	5.13	5.35	7.22	5.99	probable udp-n-acetylglucosamine--peptide n-acetylglucosaminyltransferase spindly-like	gi|75318818|sp|O82039.1|SPY_PETHYRecName: Full=Probable UDP-N-acetylglucosamine--peptide N-acetylglucosaminyltransferase SPINDLY; AltName: Full=PhSPY gi|3319682|emb|CAA76834.1| SPINDLY protein [Petunia x hybrida]
TR79230|c1_g1_i9	4.32	3.13	4.77	4.42	5.27	5.84	5.08	probable udp-n-acetylglucosamine--peptide n-acetylglucosaminyltransferase spindly-like	gi|75318818|sp|O82039.1|SPY_PETHYRecName: Full=Probable UDP-N-acetylglucosamine--peptide N-acetylglucosaminyltransferase SPINDLY; AltName: Full=PhSPY gi|3319682|emb|CAA76834.1| SPINDLY protein [Petunia x hybrida]
Mj_1_GCCAAT_L005_R1_001_(paired)_trimmed_(paired)_contig_50253	0	0	0	1.78	11.76	0.83	5.55	cytochrome p450	gi|75312214|sp|Q9M7B8.1|C79D1_MANESRecName: Full=Valine N-monooxygenase 1; AltName: Full=Cytochrome P450 79D1 gi|6739527|gb|AAF27289.1|AF140613_1 N-hydroxylating cytochrome P450 [Manihot esculenta]
TR74381|c0_g1_i2	0.18	0	0	1.13	5.32	0	16.15	cytochrome p450	gi|75312214|sp|Q9M7B8.1|C79D1_MANESRecName: Full=Valine N-monooxygenase 1; AltName: Full=Cytochrome P450 79D1 gi|6739527|gb|AAF27289.1|AF140613_1 N-hydroxylating cytochrome P450 [Manihot esculenta]
Mj_1_GCCAAT_L005_R1_001_(paired)_trimmed_(paired)_contig_7411	12.67	2.9	2.3	9.34	1.29	5.4	34.69	s-adenosylmethionine synthetase	gi|75297911|sp|Q84MM2.1|METK_LITCNRecName: Full=S-adenosylmethionine synthase; Short=AdoMet synthase; AltName: Full=Methionine adenosyltransferase; Short=MAT gi|30142157|gb|AAP13994.1| S-adenosylmethionine synthetase [Litchi chinensis]
TR67602|c0_g1_i1	6.51	3.93	10.26	1.75	4.27	1.33	11.14	aldo keto reductase	gi|75266185|sp|Q9SQ64.1|COR2_PAPSORecName: Full=Non-functional NADPH-dependent codeinone reductase 2 gi|6478216|gb|AAF13742.1|AF108438_1 putative NADPH-dependent oxidoreductase [Papaver somniferum]
TR67602|c0_g1_i3	4.45	4.4	6.54	1.91	4.88	2.29	8.87	aldo keto reductase	gi|75266185|sp|Q9SQ64.1|COR2_PAPSORecName: Full=Non-functional NADPH-dependent codeinone reductase 2 gi|6478216|gb|AAF13742.1|AF108438_1 putative NADPH-dependent oxidoreductase [Papaver somniferum]
TR79053|c0_g1_i2	7.74	2.96	1.28	2.46	2.54	3.09	4.12	ring-box protein	gi|75214626|gb|ABA18098.1|putative ring-box Roc1/Rbx1/Hrt1 protein [Olimarabidopsis pumila]
TR79053|c0_g1_i3	12.24	5.6	3.13	5.63	5.56	2.95	9.61	ring-box protein	gi|75214626|gb|ABA18098.1|putative ring-box Roc1/Rbx1/Hrt1 protein [Olimarabidopsis pumila]
TR41900|c0_g2_i1	0	0	0	0	0	0	6.43	larval cuticle protein a3a-like	gi|74778856|sp|P82166.1|CU198_LOCMIRecName: Full=Cuticle protein 19.8; AltName: Full=LmNCP19.8
TR79065|c1_g3_i8	308.98	236.89	382.61	431.59	248.64	356.57	265.77	elongation factor 1-	gi|74486744|gb|ABA12225.1|translation elongation factor 1A-9 [Gossypium hirsutum]
TR76779|c1_g4_i1	5.87	7.05	7.94	4.63	3.05	4.2	4.61	sucrose proton symporter	gi|74476789|gb|ABA08445.1|sucrose transporter type 2 [Manihot esculenta]
TR65773|c0_g1_i2	16.05	12.36	28.03	30.65	23.17	32.33	20.99	neutral alkaline invertase	gi|74476783|gb|ABA08442.1|neutral/alkaline invertase [Manihot esculenta]
TR52797|c0_g1_i2	15.77	24.89	13.98	29.51	35.72	29.69	33.07	nitrilase 1	gi|74273635|gb|ABA01485.1|nitrilase-like protein NIT [Gossypium hirsutum]
TR37648|c0_g1_i1	0	0	0	2.3	8.41	0.81	0	2-cys peroxiredoxin	gi|74272711|gb|ABA01151.1|chloroplast thioredoxin peroxidase [Chlamydomonas incerta]
TR62225|c0_g1_i1	0	0	0	1.11	9.73	1.29	0	rieske iron-sulfur subunit of the cytochrome b6f chloroplast precursor	gi|74272703|gb|ABA01147.1|chloroplast cytochrome B6/F complex rieske iron-sulfur protein [Chlamydomonas incerta]
TR77908|c0_g1_i1	1.57	2.66	0.89	53.23	13.12	3.12	4.27	atpase subunit 1	gi|74181742|dbj|BAE32582.1|unnamed protein product [Mus musculus]
TR77830|c0_g1_i2	3.83	4.99	6.32	1.57	3.26	2.86	4.49	tobamovirus multiplication 1	gi|74038605|dbj|BAE43836.1|tobamovirus multiplication 1 [Nicotiana tabacum]
Mj_1_GCCAAT_L005_R1_001_(paired)_trimmed_(paired)_contig_24984	0	0.03	0.04	6.57	3.04	9.76	0.35	beta-amyrin synthase	gi|73991374|dbj|BAE43642.1|beta-amyrin synthase [Euphorbia tirucalli]
TR55301|c0_g1_i2	0	0.1	0.13	5.46	3.65	9.95	0.36	beta-amyrin synthase	gi|73991374|dbj|BAE43642.1|beta-amyrin synthase [Euphorbia tirucalli]
TR55301|c0_g1_i8	0.22	0	0	5.65	3.32	6.91	0	beta-amyrin synthase	gi|73991374|dbj|BAE43642.1|beta-amyrin synthase [Euphorbia tirucalli]
TR62295|c3_g1_i2	603.14	516.35	1060.6	791.23	519.96	284.93	847.43	polyubiquitin 10	gi|7267292|emb|CAB81074.1|polyubiquitin (ubq10) [Arabidopsis thaliana]
TR62295|c4_g2_i1	327.41	278.49	546.09	455.18	286.53	160.64	497.08	multidrug resistance protein abc transporter family	gi|7267292|emb|CAB81074.1|polyubiquitin (ubq10) [Arabidopsis thaliana]
TR62295|c4_g2_i3	327.97	249.92	458.05	407.02	294.75	198.64	595.02	multidrug resistance protein abc transporter family	gi|7267292|emb|CAB81074.1|polyubiquitin (ubq10) [Arabidopsis thaliana]
TR69770|c0_g1_i3	1.9	1.03	1.81	5.76	4.62	8.88	2.95	sensitive to freezing 6 protein	gi|7267251|emb|CAB81034.1|hypothetical protein [Arabidopsis thaliana]
Mj_1_GCCAAT_L005_R1_001_(paired)_trimmed_(paired)_contig_6976	10.05	10.11	26.75	16.64	15.54	23.09	13.69	serine threonine-protein phosphatase pp2a catalytic subunit-like	gi|7248359|dbj|BAA92697.1|type 2A protein phosphatase-1 [Vicia faba]
TR50923|c0_g1_i1	9.96	9.81	26.21	16.77	15.2	24.63	15.2	serine threonine-protein phosphatase pp2a catalytic subunit-like	gi|7248359|dbj|BAA92697.1|type 2A protein phosphatase-1 [Vicia faba]
TR71383|c2_g3_i7	3.03	1.85	3.57	3.59	5.48	5.02	3.84	ribosomal rna methyltransferase 1	gi|6759446|emb|CAB69851.1|cell division-like protein [Arabidopsis thaliana]
C919758	0	0	0	2.59	6.96	0	0	histone h2a	gi|67526021|ref|XP_661072.1|H2A_EMENI Histone H2A [Aspergillus nidulans FGSC A4] gi|255945229|ref|XP_002563382.1| Pc20g08590 [Penicillium chrysogenum Wisconsin 54-1255] gi|121996|sp|P08844.2|H2A_EMENI RecName: Full=Histone H2A gi|168053|gb|AAA33309.1| histone H2A [Emericella nidulans] gi|40743822|gb|EAA63008.1| H2A_EMENI Histone H2A [Aspergillus nidulans FGSC A4] gi|211588117|emb|CAP86188.1| Pc20…
Mj_1_GCCAAT_L005_R1_001_(paired)_trimmed_(paired)_contig_90943	0	0	0	3.69	5.06	0.12	0	alpha beta fold family hydrolase	gi|67524525|ref|XP_660324.1|hypothetical protein AN2720.2 [Aspergillus nidulans FGSC A4] gi|40743832|gb|EAA63018.1| hypothetical protein AN2720.2 [Aspergillus nidulans FGSC A4] gi|259486369|tpe|CBF84151.1| TPA: conserved hypothetical protein [Aspergillus nidulans FGSC A4]
Mj_1_GCCAAT_L005_R1_001_(paired)_trimmed_(paired)_contig_91061	0	0	0	2.77	5.7	0	0	alpha beta fold family hydrolase	gi|67524525|ref|XP_660324.1|hypothetical protein AN2720.2 [Aspergillus nidulans FGSC A4] gi|40743832|gb|EAA63018.1| hypothetical protein AN2720.2 [Aspergillus nidulans FGSC A4] gi|259486369|tpe|CBF84151.1| TPA: conserved hypothetical protein [Aspergillus nidulans FGSC A4]
Mj_1_GCCAAT_L005_R1_001_(paired)_trimmed_(paired)_contig_92505	0	0	0	1.87	7.24	0.13	0.12	alpha beta fold family hydrolase	gi|67524525|ref|XP_660324.1|hypothetical protein AN2720.2 [Aspergillus nidulans FGSC A4] gi|40743832|gb|EAA63018.1| hypothetical protein AN2720.2 [Aspergillus nidulans FGSC A4] gi|259486369|tpe|CBF84151.1| TPA: conserved hypothetical protein [Aspergillus nidulans FGSC A4]
TR65646|c2_g3_i23	0	0.24	0	7.81	8.82	0	0.49	histone h4	gi|67516905|ref|XP_658338.1|H4_NEUCR Histone H4 [Aspergillus nidulans FGSC A4] gi|40746220|gb|EAA65376.1| H4_NEUCR Histone H4 [Aspergillus nidulans FGSC A4]
TR65646|c3_g2_i15	0	0	0	0.79	8.12	0.55	0.49	histone h4	gi|67516905|ref|XP_658338.1|H4_NEUCR Histone H4 [Aspergillus nidulans FGSC A4] gi|40746220|gb|EAA65376.1| H4_NEUCR Histone H4 [Aspergillus nidulans FGSC A4]
TR62192|c1_g1_i4	4.23	4.03	8.95	4.37	4.75	3.65	5.53	protein	gi|6730745|gb|AAF27135.1|AC018849_23unknown protein; 47435-46588 [Arabidopsis thaliana] gi|32815883|gb|AAP88335.1| At1g80500 [Arabidopsis thaliana]
TR63359|c1_g1_i3	2.93	2.3	3.14	5.06	2.77	5.88	1.84	er lumen protein retaining receptor	gi|6685428|sp|Q9ZTN2.1|ERD2_PETHYRecName: Full=ER lumen protein retaining receptor; AltName: Full=HDEL receptor; AltName: Full=PGP169-12 gi|4105782|gb|AAD02548.1| PGPS/D6 [Petunia x hybrida]
Mj_1_GCCAAT_L005_R1_001_(paired)_trimmed_(paired)_contig_805	15.67	15.59	21.78	35.76	23.22	35.05	22.77	nadph cytochrome p450 reductase	gi|6503253|gb|AAC09468.2|putative NADPH-cytochrome P450 reductase [Pisum sativum]
TR72710|c0_g1_i1	7.36	8.41	14.92	22.33	17.67	17.41	11.87	rab2 -family small gtpase	gi|642121|gb|AAA61831.1|small GTP-binding protein [Oryza sativa Indica Group]
Mj_1_GCCAAT_L005_R1_001_(paired)_trimmed_(paired)_contig_18104	3.26	0.55	3.16	2.74	5.15	4.25	8.5	allene oxide synthase	gi|63029720|gb|AAY27751.1|allene oxide synthase [Hevea brasiliensis]
Mj_1_GCCAAT_L005_R1_001_(paired)_trimmed_(paired)_contig_21786	2.59	3.6	5.08	4.31	4.86	5.33	3.94	glucan endo- -beta-glucosidase	gi|62999433|gb|AAY25165.1|beta-1,3-glucanase 1 [Ziziphus jujuba]
Mj_1_GCCAAT_L005_R1_001_(paired)_trimmed_(paired)_contig_1296	46.1	38.74	46.81	43.27	49.83	53.51	49.68	cullin 1	gi|62321756|dbj|BAD95380.1|putative cullin-like 1 protein [Arabidopsis thaliana]
TR79594|c3_g3_i4	10.74	7.56	15.03	12.19	14.5	15.93	11.17	cullin 1	gi|62321756|dbj|BAD95380.1|putative cullin-like 1 protein [Arabidopsis thaliana]
TR79701|c2_g7_i2	15.29	9.77	12.28	16.13	14.14	12.55	13.91	cullin 1	gi|62321756|dbj|BAD95380.1|putative cullin-like 1 protein [Arabidopsis thaliana]
TR63466|c0_g1_i1	16.45	14.36	17.9	18.8	16.45	36.19	18.25	dead-box atp-dependent rna helicase 56	gi|62320763|dbj|BAD95431.1|DEAD BOX RNA helicase RH15 - like protein [Arabidopsis thaliana]
TR63466|c0_g1_i4	14.78	11.83	15.85	19.9	21.91	28.35	18.14	dead-box atp-dependent rna helicase 56	gi|62319895|dbj|BAD93957.1|DEAD BOX RNA helicase RH15 - like protein [Arabidopsis thaliana]
TR71021|c1_g2_i1	6.22	6.45	6.45	3.4	6.54	5.58	5.59	ribose-phosphate pyrophosphokinase chloroplastic-like	gi|62286954|sp|Q9XG98.1|KPRS1_SPIOLRecName: Full=Ribose-phosphate pyrophosphokinase 1; AltName: Full=Phosphoribosyl pyrophosphate synthase 1 gi|4902849|emb|CAB43599.1| phosphoribosyl pyrophosphate synthase [Spinacia oleracea]
TR77666|c1_g5_i2	4.56	4.28	5.65	1.16	2.92	2.71	6.54	granule-bound starch partial	gi|61393875|gb|AAX45508.1|waxy [Banksia pulchella]
TR67214|c0_g2_i1	4.91	5.36	5.99	6.54	7.39	5.89	9.14	sodium hydrogen exchanger 6-like	gi|60932228|gb|AAX37333.1|Na+/H+ antiporter [Populus tomentosa]
TR66059|c0_g1_i1	6.43	3.58	7.16	4.03	0.82	3.51	7.03	core-2 i-branching beta- -n-acetylglucosaminyltransferase family protein	gi|60657604|gb|AAX33323.1|secondary cell wall-related glycosyltransferase family 14 [Populus tremula x Populus tremuloides]
Mj_1_GCCAAT_L005_R1_001_(paired)_trimmed_(paired)_contig_6702	4.66	6.69	5.23	11.91	1.07	43.49	4.55	endo- -beta-xylanase a-like	gi|60656567|gb|AAX33301.1|putative endo-1,4-beta-xylanase [Populus tremula x Populus tremuloides]
TR69858|c0_g1_i1	3.51	5.13	5.03	10.35	1.42	36.48	3.65	endo- -beta-xylanase a-like	gi|60656567|gb|AAX33301.1|putative endo-1,4-beta-xylanase [Populus tremula x Populus tremuloides]
scaffold11653	3.27	4.12	27.09	9.14	5.87	1.16	25.02	mip tip subfamily	gi|60498697|dbj|BAD90703.1|tonoplast intrinsic protein 1;2 [Mimosa pudica]
TR45671|c1_g1_i2	0	0	0	4.73	12.4	0	0	cnd01770-like protein	gi|58266208|ref|XP_570260.1|hypothetical protein [Cryptococcus neoformans var. neoformans JEC21] gi|134111172|ref|XP_775728.1| hypothetical protein CNBD4570 [Cryptococcus neoformans var. neoformans B-3501A] gi|50258392|gb|EAL21081.1| hypothetical protein CNBD4570 [Cryptococcus neoformans var. neoformans B-3501A] gi|57226493|gb|AAW42953.1| expressed protein [Cryptococcus neoformans var. neoformans…
TR56774|c0_g1_i1	116.5	10.36	69.88	8.26	4.49	5.55	32.98	alpha- partial	gi|5757892|gb|AAD50628.1|AF106570_1alpha-tubulin [Gossypium hirsutum]
TR56774|c0_g1_i2	105.75	7.49	63.15	3.44	2.91	5.76	36.55	alpha- partial	gi|5757892|gb|AAD50628.1|AF106570_1alpha-tubulin [Gossypium hirsutum]
Mj_1_GCCAAT_L005_R1_001_(paired)_trimmed_(paired)_contig_67565	0	0.53	21.4	28.55	30.07	23.06	2.41	cinnamyl alcohol dehydrogenase-like protein	gi|57229665|gb|AAW45741.1|sinapyl alcohol dehydrogenase-like protein [Populus tremula x Populus tremuloides]
TR57340|c0_g2_i1	0.09	0.53	30.54	33.14	47.14	30.55	5.05	cinnamyl alcohol dehydrogenase-like protein	gi|57229665|gb|AAW45741.1|sinapyl alcohol dehydrogenase-like protein [Populus tremula x Populus tremuloides]
Mj_1_GCCAAT_L005_R1_001_(paired)_trimmed_(paired)_contig_28654	1.2	0.76	2.95	6.86	13.68	5.47	1.29	orf101b	gi|57013963|ref|YP_173435.1|hypothetical protein NitaMp096 [Nicotiana tabacum] gi|56806599|dbj|BAD83500.1| hypothetical protein (mitochondrion) [Nicotiana tabacum]
Mj_1_GCCAAT_L005_R1_001_(paired)_trimmed_(paired)_contig_25533	1.47	0.62	5.17	17.05	52.79	19.51	6.9	orf3 gene product	gi|57013950|ref|YP_173422.1|hypothetical protein NitaMp080 [Nicotiana tabacum] gi|56806586|dbj|BAD83487.1| hypothetical protein (mitochondrion) [Nicotiana tabacum]
TR42614|c0_g1_i1	21.54	3.06	164.76	12.48	44.03	12.84	46.75	gibberellin-regulated protein	gi|56236464|gb|AAV84588.1|Gip1-like protein [Populus tomentosa] gi|56236466|gb|AAV84589.1| Gip1-like protein [Populus tomentosa]
TR42625|c0_g1_i1	26.73	4.95	220.07	15.93	56.88	19.41	69.94	gibberellin-regulated protein	gi|56236464|gb|AAV84588.1|Gip1-like protein [Populus tomentosa] gi|56236466|gb|AAV84589.1| Gip1-like protein [Populus tomentosa]
TR57170|c0_g1_i1	0	0	1.05	113	207.36	114.65	7.15	kn1-like protein	gi|56236458|gb|AAV84585.1|knotted-like homeobox protein [Populus tomentosa]
Mj_1_GCCAAT_L005_R1_001_(paired)_trimmed_(paired)_contig_1013	559.36	1580.44	127.96	25.75	37.71	15.83	241.14	plastidic aldolase	gi|56122688|gb|AAV74407.1|chloroplast latex aldolase-like protein [Manihot esculenta]
TR57286|c0_g1_i2	12.72	16.83	10.08	4.3	5.7	4	12.57	glycerophosphoryl diester phosphodiesterase	gi|56122686|gb|AAV74406.1|glycerophosphodiester phosphodiesterase-like protein [Manihot esculenta]
TR68338|c1_g1_i1	29.83	25.88	30.48	21.11	15.65	18.34	34.33	nadh-cytochrome b5 reductase	gi|55979111|gb|AAV69019.1|NADH:cytochrome b5 reductase [Vernicia fordii] gi|55979115|gb|AAV69021.1| NADH:cytochrome b5 reductase [Vernicia fordii]
scaffold12067	22.26	16.03	18.49	14.26	12.38	12.22	23.37	nadh-cytochrome b5 reductase	gi|55979111|gb|AAV69019.1|NADH:cytochrome b5 reductase [Vernicia fordii] gi|55979115|gb|AAV69021.1| NADH:cytochrome b5 reductase [Vernicia fordii]
scaffold12068	13.97	11.25	16.02	8.89	8.25	12.35	19.85	nadh-cytochrome b5 reductase	gi|55979111|gb|AAV69019.1|NADH:cytochrome b5 reductase [Vernicia fordii] gi|55979115|gb|AAV69021.1| NADH:cytochrome b5 reductase [Vernicia fordii]
scaffold14472	0.54	1.18	0.32	11.11	4.81	0.73	1.23	cytochrome c oxidase subunit 1	gi|55975988|gb|AAV68252.1|cytochrome oxidase subunit 1-2 [Daucus carota]
TR72004|c1_g1_i1	7.76	10.81	10.13	114.29	69.32	7.67	105.45	pollen ole e 1 allergen and extensin family protein	gi|559237|gb|AAA98492.1|tyrosine-rich hydroxyproline-rich glycoprotein, partial [Petroselinum crispum]
TR72004|c3_g4_i1	3.87	10.94	8.02	142.19	95.08	8.24	102.22	pollen ole e 1 allergen and extensin family protein	gi|559237|gb|AAA98492.1|tyrosine-rich hydroxyproline-rich glycoprotein, partial [Petroselinum crispum]
Mj_1_GCCAAT_L005_R1_001_(paired)_trimmed_(paired)_contig_75149	0	0.48	2.06	1.58	0	5.79	0	lipid transfer protein precursor	gi|55774584|gb|AAV64877.1|non-specific lipid transfer protein [Prunus persica] gi|190613923|gb|ACE80965.1| putative allergen Pru p 3.01 [Prunus dulcis x Prunus persica] gi|313575718|gb|ADR66939.1| non-specific lipid transfer protein [Prunus persica] gi|313575720|gb|ADR66940.1| non-specific lipid transfer protein [Prunus persica var. nucipersica] gi|313575722|gb|ADR66941.1| non-specific lipid tran…
TR57485|c1_g1_i2	0.74	0.8	0.33	12.61	5.01	0.94	1.19	cytochrome c oxidase subunit 1	gi|55591516|gb|AAV54057.1|cytochrome oxidase subunit I [Daucus carota]
TR55970|c0_g2_i1	0	0	0	2.57	8.6	1	0	thioredoxin h	gi|53801490|gb|AAU93947.1|thioredoxin H [Helicosporidium sp. ex Simulium jonesi]
TR54718|c0_g1_i1	17.2	42.87	26.09	32.56	60.49	27.94	43.71	hypothetical protein	gi|52745118|emb|CAH56540.1|hypothetical protein [Ricinus communis]
Mj_1_GCCAAT_L005_R1_001_(paired)_trimmed_(paired)_contig_30545	0.79	1.53	0.45	25.41	6.47	1.09	2.46	apocytochrome b	gi|52082696|gb|AAU25941.1|cytochrome b [Vitis vinifera]
TR72920|c1_g2_i1	0.62	0.99	0.39	10.65	3.49	0.63	1.83	apocytochrome b	gi|52082696|gb|AAU25941.1|cytochrome b [Vitis vinifera]
Mj_1_GCCAAT_L005_R1_001_(paired)_trimmed_(paired)_contig_4909	2.74	10.63	10.08	19.16	23.2	37.61	15.21	sucrose transporter	gi|52078041|gb|AAU21439.1|putative sucrose carrier [Ricinus communis]
TR58048|c3_g1_i1	117.76	7.5	69.21	3.85	2.51	5.38	31.62	alpha- partial	gi|52001189|gb|AAU21475.1|alpha-tubulin, partial [Camellia sinensis]
TR42491|c0_g1_i1	0.71	1.43	9.95	894.27	212.26	0.2	1.11	rna-dependent rna polymerase	gi|51980898|ref|YP_077186.1|RNA-dependent RNA polymerase [Carrot red leaf virus] gi|51492439|gb|AAU04781.1| RNA-dependent RNA polymerase [Carrot red leaf virus]
TR69345|c0_g3_i8	2.88	3.68	2.26	2.65	4.99	5.3	3.3	yippee-like zinc-binding protein	gi|51970424|dbj|BAD43904.1|zinc-binding protein-like [Arabidopsis thaliana]
TR60806|c1_g1_i1	10.56	10.4	17.84	12.04	11.52	10.21	6.91	cytochrome b5	gi|50844679|gb|AAT84461.1|cytochrome b5 isoform Cb5-D [Vernicia fordii]
scaffold11027	8.44	9.41	15.11	8.31	9.97	8.73	5.04	cytochrome b5	gi|50844679|gb|AAT84461.1|cytochrome b5 isoform Cb5-D [Vernicia fordii]
TR53991|c0_g1_i1	19.77	18.42	27.38	26.36	23.83	23.77	26.86	cytochrome b5	gi|50844675|gb|AAT84459.1|cytochrome b5 isoform Cb5-B [Vernicia fordii]
Mj_1_GCCAAT_L005_R1_001_(paired)_trimmed_(paired)_contig_94745	0	0	0	1.57	5.9	0	0	protein rds1	gi|50417629|ref|XP_457712.1|DEHA2C00726p [Debaryomyces hansenii CBS767] gi|49653378|emb|CAG85738.1| DEHA2C00726p [Debaryomyces hansenii CBS767]
TR66298|c0_g1_i1	0.12	0	1.03	2.99	5.91	2.37	0.74	endo- -beta-glucanase	gi|50346664|gb|AAT75042.1|Cel9B [Populus tremula x Populus tremuloides]
scaffold12365	10.44	13.5	11.73	43.66	23.45	51.14	31.05	inactive beta-amylase 9	gi|5031285|gb|AAD38148.1|AF139501_1beta-amylase [Prunus armeniaca]
TR40333|c1_g1_i1	0	0	0	1.61	8.91	0.84	0	heat shock protein 70	gi|498775|emb|CAA55184.1|heat shock protein 70 kDa [Zea mays]
TR79039|c0_g6_i12	151.53	121.25	170.6	186.2	103.18	150.01	139.94	elongation factor 1-	gi|48527431|gb|AAT45847.1|elongation factor 1-alpha 1 [Elaeis guineensis] gi|192913028|gb|ACF06622.1| elongation factor 1-alpha 1 [Elaeis guineensis]
TR79039|c0_g6_i8	285.82	206.38	305.81	301.92	172.81	227.35	214.61	elongation factor 1-	gi|48527431|gb|AAT45847.1|elongation factor 1-alpha 1 [Elaeis guineensis] gi|192913028|gb|ACF06622.1| elongation factor 1-alpha 1 [Elaeis guineensis]
TR79807|c5_g2_i1	1.82	1.39	2.4	5.46	2.3	2.6	2.59	retrotransposon ty3-gypsy subclass	gi|47824970|gb|AAT38744.1|Putative gag-pol polyprotein, identical [Solanum demissum]
TR79807|c5_g1_i5	3.33	3.03	2.61	6.61	2.39	3.12	3.1	retrotransposon ty3-gypsy subclass	gi|47824950|gb|AAT38724.1|Putative retrotransposon protein, identical [Solanum demissum]
Mj_1_GCCAAT_L005_R1_001_(paired)_trimmed_(paired)_contig_8952	13.41	17.24	49.9	113.53	204.03	378.36	113.89	abscisic stress ripening	gi|47575681|gb|AAT35818.1|abscisic stress ripening protein-like protein [Musa acuminata]
TR69942|c0_g2_i3	7.25	0.71	3.06	2.06	0.83	1.85	5.86	ribonucleoside-diphosphate alpha subunit	gi|47497381|dbj|BAD19419.1|putative ribonucleotide reductase [Oryza sativa Japonica Group] gi|125584063|gb|EAZ24994.1| hypothetical protein OsJ_08774 [Oryza sativa Japonica Group] gi|186920366|gb|ACC95436.1| ribonucleotide diphosphate reductase large subunit 2 [Oryza sativa Japonica Group]
Mj_1_GCCAAT_L005_R1_001_(paired)_trimmed_(paired)_contig_1728	200.58	5.36	84.38	5.79	8.34	4.29	50.63	histone h3	gi|47225158|emb|CAF98785.1|unnamed protein product [Tetraodon nigroviridis]
TR79053|c0_g1_i1	6.02	2.91	1.35	2.58	1.58	2.13	4.34	ring-box protein	gi|47087614|gb|AAT10276.1|putative ring-box protein [Fragaria x ananassa]
TR60487|c1_g1_i1	254.84	208.06	546.34	720.78	2076.39	694	553.82	type 2 metallothionein	gi|47076850|dbj|BAD18375.1|type 2 metallothionein [Vigna radiata var. radiata]
TR64122|c2_g1_i6	2.33	1.66	12.32	4.25	2.26	1.42	0.8	glucose-6-phosphate phosphate translocator chloroplastic-like	gi|47027063|gb|AAT08746.1|glucose-6-phosphate/phosphate-translocator [Hyacinthus orientalis]
Mj_1_GCCAAT_L005_R1_001_(paired)_trimmed_(paired)_contig_10379	2.05	2.93	3.96	3.48	6.57	4.39	3.46	aspartic proteinase	gi|47027053|gb|AAT08741.1|aspartic proteinase [Hyacinthus orientalis]
Mj_1_GCCAAT_L005_R1_001_(paired)_trimmed_(paired)_contig_691	102.31	112.79	255.08	279.88	446.79	531.32	306.8	adp-ribosylation factor	gi|47026845|gb|AAT08648.1|ADP-ribosylation factor [Hyacinthus orientalis]
Mj_1_GCCAAT_L005_R1_001_(paired)_trimmed_(paired)_contig_21169	0.3	0.06	3.23	28.55	24.54	12.65	2.47	sucrose proton symporter	gi|468562|emb|CAA83436.1|sucrose carrier [Ricinus communis]
TR76345|c0_g2_i2	0.35	0.05	5.54	40.21	32.81	15.7	2.13	sucrose proton symporter	gi|468562|emb|CAA83436.1|sucrose carrier [Ricinus communis]
TR76345|c0_g2_i3	0.3	0.14	7.1	38.46	31.52	18.82	3.23	sucrose proton symporter	gi|468562|emb|CAA83436.1|sucrose carrier [Ricinus communis]
TR45918|c0_g1_i1	270.73	130.18	350.91	329.85	434.43	365.23	240.86	60s ribosomal protein l35-like	gi|46397044|sp|Q9M5L0.1|RL35_EUPESRecName: Full=60S ribosomal protein L35 gi|6984224|gb|AAF34800.1|AF227980_1 60S ribosomal protein L35 [Euphorbia esula]
scaffold11810	129.84	61.83	174.78	167.45	219.76	183.97	127.33	60s ribosomal protein l35-like	gi|46397044|sp|Q9M5L0.1|RL35_EUPESRecName: Full=60S ribosomal protein L35 gi|6984224|gb|AAF34800.1|AF227980_1 60S ribosomal protein L35 [Euphorbia esula]
Mj_1_GCCAAT_L005_R1_001_(paired)_trimmed_(paired)_contig_104238	0	0	0	0.28	7.28	0	0	secretory phospholipase a2	gi|46116138|ref|XP_384087.1|hypothetical protein FG03911.1 [Gibberella zeae PH-1]
C937446	0	0	0.2	5.42	6.89	0	0	calmodulin	gi|46110018|ref|XP_382067.1|CALM_NEUCR Calmodulin (CaM) [Gibberella zeae PH-1] gi|116198243|ref|XP_001224933.1| calmodulin [Chaetomium globosum CBS 148.51] gi|164426548|ref|XP_961276.2| calmodulin [Neurospora crassa OR74A] gi|171694241|ref|XP_001912045.1| hypothetical protein [Podospora anserina S mat+] gi|302404642|ref|XP_003000158.1| calmodulin [Verticillium albo-atrum VaMs.102] gi|302897869|re…
TR45830|c0_g1_i1	0	0	0	1.93	9.8	0.81	0	fk506-binding protein	gi|46019950|emb|CAG25527.1|putative FK506-binding protein [Suberites ficus]
scaffold14461	12.64	6.05	11.61	10.71	9.11	8.47	9.67	ribosomal protein l34	gi|45725013|emb|CAG23918.1|LIN1 protein [Cicer arietinum]
TR53884|c0_g1_i2	44.36	24.97	71.74	52.31	52.61	42.49	53.17	cyclin-dependent protein kinase p34cdc2	gi|454980|emb|CAA54746.1|cdc2Pa [Picea abies] gi|116778762|gb|ABK20983.1| unknown [Picea sitchensis]
Mj_1_GCCAAT_L005_R1_001_(paired)_trimmed_(paired)_contig_1479	42.15	64.72	23.02	54.5	22.73	89.15	18.75	vacuolar h+-translocating inorganic pyrophosphatase	gi|45479863|gb|AAS66771.1|PPase [Hevea brasiliensis]
TR71743|c0_g1_i1	68.74	114.9	48.6	96.08	44.36	163.28	31.83	vacuolar h+-translocating inorganic pyrophosphatase	gi|45479863|gb|AAS66771.1|PPase [Hevea brasiliensis]
Mj_1_GCCAAT_L005_R1_001_(paired)_trimmed_(paired)_contig_13081	4.3	2.06	0.92	7.13	5.25	2.17	2.51	polyprotein	gi|4544415|gb|AAD22324.1|putative retroelement pol polyprotein [Arabidopsis thaliana]
Mj_1_GCCAAT_L005_R1_001_(paired)_trimmed_(paired)_contig_3128	73.89	96.12	39.02	46.93	38.95	39.75	50.78	peptide methionine sulfoxide reductase	gi|42795445|gb|AAS46232.1|methionine sulfoxide reductase A [Populus trichocarpa x Populus deltoides]
TR78259|c3_g2_i2	0.9	1.29	2.39	5.7	5.03	53.78	2.44	nodulin 21 -like transporter family protein	gi|42568214|ref|NP_198840.2|nodulin MtN21 /EamA-like transporter family protein [Arabidopsis thaliana] gi|10177511|dbj|BAB10905.1| nodulin-like protein [Arabidopsis thaliana] gi|30725298|gb|AAP37671.1| At5g40240 [Arabidopsis thaliana] gi|110743630|dbj|BAE99652.1| hypothetical protein [Arabidopsis thaliana] gi|332007140|gb|AED94523.1| nodulin MtN21 /EamA-like transporter family protein [Arabidopsi…
TR78413|c0_g7_i3	1.06	1.92	1.24	2.44	6.33	9.93	2.94	nodulin 21 -like transporter family protein	gi|42568214|ref|NP_198840.2|nodulin MtN21 /EamA-like transporter family protein [Arabidopsis thaliana] gi|10177511|dbj|BAB10905.1| nodulin-like protein [Arabidopsis thaliana] gi|30725298|gb|AAP37671.1| At5g40240 [Arabidopsis thaliana] gi|110743630|dbj|BAE99652.1| hypothetical protein [Arabidopsis thaliana] gi|332007140|gb|AED94523.1| nodulin MtN21 /EamA-like transporter family protein [Arabidopsi…
TR62888|c0_g1_i1	2.02	2.32	3.33	0.64	2.71	2.23	5.17	aldo keto reductase	gi|4249390|gb|AAD14487.1|Similar to gb|AF039182 probable aldo-keto reductase from Fragaria x ananassa. This gene may be cut off. EST gb|U74151 comes from this gene, partial [Arabidopsis thaliana]
scaffold12156	0.43	0.41	5.47	19.26	21.07	4.09	8.33	amino acid permease	gi|4164408|emb|CAA10608.1|amino acid carrier [Ricinus communis]
scaffold12355	178.13	105.35	162.63	146.4	228.42	161.23	233.02	histone h3	gi|413953368|gb|AFW86017.1|histone H3 [Zea mays]
TR64724|c0_g1_i2	8.46	5.78	12.53	7.12	5.37	7.42	7.86	pyrophosphate--fructose-6-phosphate 1-phosphotransferase	gi|413952528|gb|AFW85177.1|hypothetical protein ZEAMMB73_337200 [Zea mays]
TR67878|c0_g2_i2	7.43	3.16	11.91	2.62	2.46	6.63	4.27	shaggy-related protein kinase eta	gi|413947709|gb|AFW80358.1|putative glycogen synthase kinase family protein [Zea mays]
TR73788|c0_g1_i1	3.67	1.04	6.36	2.05	1.29	3.11	2.34	shaggy-related protein kinase	gi|413947709|gb|AFW80358.1|putative glycogen synthase kinase family protein [Zea mays]
TR73788|c0_g1_i3	4.93	1.07	8.18	2.48	5.68	3.72	3.53	shaggy-related protein kinase	gi|413947709|gb|AFW80358.1|putative glycogen synthase kinase family protein [Zea mays]
TR31043|c0_g3_i1	46.8	88.16	3.8	12.66	2.7	0.75	2.37	hypothetical protein ZEAMMB73_233690	gi|413939054|gb|AFW73605.1|hypothetical protein ZEAMMB73_233690 [Zea mays]
TR68890|c2_g1_i13	6.62	5.42	6.42	4.69	6.26	3.28	6.54	serine threonine-protein kinase afc2	gi|413937599|gb|AFW72150.1|putative protein kinase superfamily protein [Zea mays]
TR57832|c2_g2_i1	361.37	218.82	214.26	257.3	375.58	245.01	297.97	histone h3	gi|413937382|gb|AFW71933.1|histone H3, partial [Zea mays]
Mj_1_GCCAAT_L005_R1_001_(paired)_trimmed_(paired)_contig_23723	3.58	2.05	5.27	4.26	6.95	7.94	6	heat shock protein 60	gi|413934099|gb|AFW68650.1|chaperonin 1 [Zea mays]
TR42890|c0_g1_i2	3.73	2.32	8.13	6.21	10.3	4.34	6.25	hypothetical protein ZEAMMB73_191710, partial	gi|413926862|gb|AFW66794.1|hypothetical protein ZEAMMB73_191710, partial [Zea mays]
TR106109|c0_g1_i1	18.44	15.84	2.37	5.66	1.39	0.69	2.14	hypothetical protein ZEAMMB73_166360	gi|413922626|gb|AFW62558.1|hypothetical protein ZEAMMB73_166360 [Zea mays]
Mj_1_GCCAAT_L005_R1_001_(paired)_trimmed_(paired)_contig_36926	3.21	3.92	11.13	5.94	6.39	3.56	7.03	adp-ribosylation factor 3	gi|413921018|gb|AFW60950.1|hypothetical protein ZEAMMB73_156310 [Zea mays]
Mj_1_GCCAAT_L005_R1_001_(paired)_trimmed_(paired)_contig_2060	25.9	20.98	43.18	31.57	22.41	8.55	35.07	wd40-like beta propeller repeat family expressed	gi|413917762|gb|AFW57694.1|putative WD40-like beta propeller repeat family protein [Zea mays]
scaffold10369	176.59	13.27	87.75	8.45	4.64	7.39	46.38	alpha-tubulin	gi|410964336|ref|XP_003988711.1|PREDICTED: tubulin alpha-1C chain [Felis catus]
Mj_1_GCCAAT_L005_R1_001_(paired)_trimmed_(paired)_contig_10590	9.92	5.28	0.41	0.73	0.17	0.51	39.73	(-)-germacrene d synthase	gi|41058926|gb|AAR99061.1|(-)-germacrene D synthase [Populus trichocarpa x Populus deltoides]
Mj_1_GCCAAT_L005_R1_001_(paired)_trimmed_(paired)_contig_7710	2.47	3.75	9.13	43.42	7.07	14.25	4.55	(-)-germacrene d synthase	gi|41058926|gb|AAR99061.1|(-)-germacrene D synthase [Populus trichocarpa x Populus deltoides]
Mj_1_GCCAAT_L005_R1_001_(paired)_trimmed_(paired)_contig_7718	3.2	2.01	0.92	3.23	0.94	1.05	58.98	(-)-germacrene d synthase	gi|41058926|gb|AAR99061.1|(-)-germacrene D synthase [Populus trichocarpa x Populus deltoides]
TR77737|c0_g1_i1	10.83	3.52	0.24	0	0	0	38.83	(-)-germacrene d synthase	gi|41058926|gb|AAR99061.1|(-)-germacrene D synthase [Populus trichocarpa x Populus deltoides]
TR77737|c2_g3_i7	3.58	4.36	9.97	32.8	6.81	15.17	5.46	(-)-germacrene d synthase	gi|41058926|gb|AAR99061.1|(-)-germacrene D synthase [Populus trichocarpa x Populus deltoides]
TR78346|c0_g2_i2	7.39	8.31	22.5	70.07	19.32	26.44	9.02	(-)-germacrene d synthase	gi|41058926|gb|AAR99061.1|(-)-germacrene D synthase [Populus trichocarpa x Populus deltoides]
TR78346|c0_g3_i2	2.99	2.93	5.93	20.2	4.76	8.21	10.32	(-)-germacrene d synthase	gi|41058926|gb|AAR99061.1|(-)-germacrene D synthase [Populus trichocarpa x Populus deltoides]
TR78346|c0_g3_i3	2.76	2.35	5.91	16.29	2.95	8.44	10.4	(-)-germacrene d synthase	gi|41058926|gb|AAR99061.1|(-)-germacrene D synthase [Populus trichocarpa x Populus deltoides]
TR78346|c0_g3_i5	0.92	0.7	2.81	16.61	5.21	5.7	3.26	(-)-germacrene d synthase	gi|41058926|gb|AAR99061.1|(-)-germacrene D synthase [Populus trichocarpa x Populus deltoides]
TR78346|c0_g5_i1	17.06	11.49	1.25	0.98	0.5	0.25	58.56	(-)-germacrene d synthase	gi|41058926|gb|AAR99061.1|(-)-germacrene D synthase [Populus trichocarpa x Populus deltoides]
TR18066|c0_g2_i1	0	0	0	5.39	6.63	0.58	0	plasma membrane proteolipid 3	gi|410516918|sp|Q4HXT6.2|PMP3_GIBZERecName: Full=Plasma membrane proteolipid 3
TR67896|c4_g1_i1	0	0	0	45.39	131.03	0.63	0	glucose-repressible protein	gi|408396578|gb|EKJ75734.1|hypothetical protein FPSE_04116 [Fusarium pseudograminearum CS3096]
TR71146|c1_g1_i1	5.84	11.82	5.51	3.89	2.65	3.1	5.5	hexokinase protein hxk7	gi|408362903|gb|AFU56883.1|hexokinase [Malus x domestica]
Mj_1_GCCAAT_L005_R1_001_(paired)_trimmed_(paired)_contig_2643	10.53	7.86	14.52	9.13	16.46	7.48	0	short vegetative phase protein	gi|40806814|gb|AAR92206.1|MADS box transcription factor [Populus tomentosa]
TR60516|c2_g3_i1	11.78	6.88	16.75	9.87	23.68	13.89	0.12	mads-box protein svp	gi|40806814|gb|AAR92206.1|MADS box transcription factor [Populus tomentosa]
TR60516|c2_g3_i4	15.65	9.18	20.26	8.03	20.94	12.82	0.66	mads-box protein svp	gi|40806814|gb|AAR92206.1|MADS box transcription factor [Populus tomentosa]
TR60971|c4_g1_i1	38.3	21.49	46.11	19.07	47.36	24.65	0.26	agl24 mads-box transcription factor	gi|40806814|gb|AAR92206.1|MADS box transcription factor [Populus tomentosa]
TR85307|c0_g1_i1	7.47	5.37	18.13	7.01	10.42	5.42	2.98	actin	gi|407955611|dbj|BAM48917.1|actin, partial [Eriobotrya japonica]
TR46983|c1_g1_i1	0	0	0	2.74	7.41	0.24	0	formate dehydrogenase	gi|407928190|gb|EKG21060.1|hypothetical protein MPH_01604 [Macrophomina phaseolina MS6]
Mj_1_GCCAAT_L005_R1_001_(paired)_trimmed_(paired)_contig_99484	0	0	0	2.45	5.37	0	0	hypothetical protein MPH_03787	gi|407925998|gb|EKG18970.1|hypothetical protein MPH_03787 [Macrophomina phaseolina MS6]
C962990	0	0	0	1.69	5.04	0.09	0	gtp-binding protein	gi|407925175|gb|EKG18194.1|hypothetical protein MPH_04583 [Macrophomina phaseolina MS6]
TR75437|c1_g1_i1	0	0	0	6.3	7.56	0.27	0	elongation factor 1-alpha	gi|407924233|gb|EKG17287.1|HR1 repeat rho-binding protein [Macrophomina phaseolina MS6]
Mj_1_GCCAAT_L005_R1_001_(paired)_trimmed_(paired)_contig_104780	0	0	0	0	6.29	0	0	protocatechuate -dioxygenase beta subunit	gi|407921181|gb|EKG14344.1|hypothetical protein MPH_08524 [Macrophomina phaseolina MS6]
C920298	0	0	0	0.73	5.88	0	0	60s ribosomal protein l9	gi|407917381|gb|EKG10690.1|Ribosomal protein L6 [Macrophomina phaseolina MS6]
Mj_1_GCCAAT_L005_R1_001_(paired)_trimmed_(paired)_contig_91423	0	0	0	5.41	2.12	0	0	non-classical export protein	gi|407916763|gb|EKG10094.1|hypothetical protein MPH_12825 [Macrophomina phaseolina MS6]
TR78390|c2_g1_i1	6.97	7.8	10.26	2.91	4.44	3.88	8.26	tobamovirus multiplication 1	gi|407728579|dbj|BAM48560.1|tobamovirus multiplication 1 [Solanum habrochaites]
TR78390|c2_g1_i3	5.24	4.88	8.52	1.21	3.82	2.23	5.82	tobamovirus multiplication 1	gi|407728579|dbj|BAM48560.1|tobamovirus multiplication 1 [Solanum habrochaites]
TR78390|c2_g1_i2	10.83	10.6	19.07	3.6	9	4.69	10.39	tobamovirus multiplication 1	gi|407728573|dbj|BAM48557.1|tobamovirus multiplication 1 [Solanum habrochaites] gi|407728583|dbj|BAM48562.1| tobamovirus multiplication 1 [Solanum habrochaites]
TR58462|c0_g1_i2	0	0	0	4.27	11.81	0.19	0	alcohol oxidase	gi|406866895|gb|EKD19934.1|alcohol oxidase p68 [Marssonina brunnea f. sp. 'multigermtubi' MB_m1]
C920920	0	0	0	0	5.47	0	0	pectate lyase a	gi|406866595|gb|EKD19634.1|pectate lyase 1 [Marssonina brunnea f. sp. 'multigermtubi' MB_m1]
Mj_1_GCCAAT_L005_R1_001_(paired)_trimmed_(paired)_contig_105118	0	0	0	0	6.34	0	0	pectate lyase b	gi|406866595|gb|EKD19634.1|pectate lyase 1 [Marssonina brunnea f. sp. 'multigermtubi' MB_m1]
Mj_1_GCCAAT_L005_R1_001_(paired)_trimmed_(paired)_contig_104761	0	0	0	0	9.25	0	0	mismatched base pair and cruciform dna recognition	gi|406863979|gb|EKD17025.1|mismatched base pair and cruciform DNA recognition [Marssonina brunnea f. sp. 'multigermtubi' MB_m1]
C936276	0	0	0	0	5.74	0	0	pectate lyase	gi|406863100|gb|EKD16148.1|pectate lyase [Marssonina brunnea f. sp. 'multigermtubi' MB_m1]
Mj_1_GCCAAT_L005_R1_001_(paired)_trimmed_(paired)_contig_88850	0	0	0	0	5.36	0	0	pectate lyase	gi|406863100|gb|EKD16148.1|pectate lyase [Marssonina brunnea f. sp. 'multigermtubi' MB_m1]
Mj_1_GCCAAT_L005_R1_001_(paired)_trimmed_(paired)_contig_105162	0	0	0	0	6.26	0	0	stress response protein	gi|406862767|gb|EKD15816.1|hypothetical protein MBM_05827 [Marssonina brunnea f. sp. 'multigermtubi' MB_m1]
TR49616|c1_g1_i1	0	0	0	1.27	5.72	0	0	histone h2b	gi|406862070|gb|EKD15122.1|histone H2B [Marssonina brunnea f. sp. 'multigermtubi' MB_m1]
TR49616|c1_g1_i7	0	0	0	2.23	5.25	0.26	0	histone h2b	gi|406862070|gb|EKD15122.1|histone H2B [Marssonina brunnea f. sp. 'multigermtubi' MB_m1]
C932788	0	0	0	4.45	6.15	0	0.74	upf0591 membrane protein	gi|406860848|gb|EKD13905.1|hypothetical protein MBM_08106 [Marssonina brunnea f. sp. 'multigermtubi' MB_m1]
TR58113|c1_g1_i1	0	0	0	6.34	11.92	0	0.26	upf0591 membrane protein	gi|406860848|gb|EKD13905.1|hypothetical protein MBM_08106 [Marssonina brunnea f. sp. 'multigermtubi' MB_m1]
TR8706|c0_g1_i1	0	0	0	0	22.95	0	0	upf0591 membrane protein	gi|406860848|gb|EKD13905.1|hypothetical protein MBM_08106 [Marssonina brunnea f. sp. 'multigermtubi' MB_m1]
C919594	0	0	0	0	5.58	0	0.23	superoxide dismutase	gi|406859434|gb|EKD12500.1|superoxide dismutase Cu-Zn [Marssonina brunnea f. sp. 'multigermtubi' MB_m1]
C964814	0	0	0	0.36	8.96	0	0	extracellular dioxygenase	gi|406859138|gb|EKD12207.1|extracellular dioxygenase [Marssonina brunnea f. sp. 'multigermtubi' MB_m1]
TR11939|c0_g1_i1	0	0	0	4.86	6.01	0.42	0	superoxide dismutase	gi|405779433|gb|AFS18597.1|Cu/Zn superoxide dismutase [Setosphaeria turcica]
TR49230|c0_g1_i1	0	0	0	2.04	5.52	0.53	0	heat shock protein 70	gi|405778181|dbj|BAM44861.1|heat shock protein, partial [Botryococcus braunii]
TR75875|c0_g1_i4	0.2	0.22	0.07	6.38	2.02	0.42	0.55	cytochrome c oxidase subunit 2	gi|404481707|ref|YP_006666139.1|cytochrome c oxidase subunit II (mitochondrion) [Malus x domestica] gi|401661942|emb|CBX33403.1| cox2 (mitochondrion) [Malus x domestica]
TR70204|c1_g1_i2	4.08	3.63	1.66	5.44	6.34	5.53	8.8	leucoanthocyanidin reductase	gi|403406444|dbj|BAM42672.1|leucoanthocyanidin reductase [Vaccinium ashei]
TR62394|c0_g1_i12	0	0	0	6.95	5.72	0	0.27	ylr154w-a-like protein	gi|403334965|gb|EJY66653.1|hypothetical protein OXYTRI_13058 [Oxytricha trifallax]
TR62394|c0_g1_i4	0	0	0	5.79	2.08	0	0.51	rrna intron-encoded homing endonuclease	gi|403334965|gb|EJY66653.1|hypothetical protein OXYTRI_13058 [Oxytricha trifallax]
TR62394|c0_g1_i7	0	0	0	5.26	1.3	0	0.34	protein	gi|403334965|gb|EJY66653.1|hypothetical protein OXYTRI_13058 [Oxytricha trifallax]
Mj_1_GCCAAT_L005_R1_001_(paired)_trimmed_(paired)_contig_3109	5.8	3.85	4.12	12.82	10.94	19.6	5.14	acyl- oxidase	gi|402715752|gb|AFQ93694.1|acyl-CoA oxidase 2 [Prunus persica]
TR73609|c2_g1_i2	2.54	2.41	2.17	2.71	2.45	6.46	3.78	sucrose phosphate synthase	gi|402534430|dbj|BAM37540.1|sucrose phosphate synthase [Mangifera indica]
TR73609|c2_g1_i5	3.16	2.61	2.5	3.32	2.16	8.19	3.54	sucrose phosphate synthase	gi|402534430|dbj|BAM37540.1|sucrose phosphate synthase [Mangifera indica]
Mj_1_GCCAAT_L005_R1_001_(paired)_trimmed_(paired)_contig_99470	0	0	0	0.46	7.74	0	0	duf636 domain protein	gi|400600470|gb|EJP68144.1|DUF636 domain protein [Beauveria bassiana ARSEF 2860]
TR50211|c0_g1_i1	7.48	2.42	9.51	12.51	9.89	15.26	9.09	somatic embryogenesis receptor-like kinase	gi|400532041|gb|AFP87140.1|somatic embryogenesis receptor-like kinase [Camellia nitidissima]
scaffold12804	9.06	3.91	10.92	16.26	15.53	21.07	12.55	somatic embryogenesis receptor-like kinase	gi|400532041|gb|AFP87140.1|somatic embryogenesis receptor-like kinase [Camellia nitidissima]
TR56284|c1_g1_i1	0	0	0	3.56	8.69	0.83	0	adp atp	gi|399014|sp|P31692.1|ADT_CHLKERecName: Full=ADP,ATP carrier protein; AltName: Full=ADP/ATP translocase; AltName: Full=Adenine nucleotide translocator; Short=ANT gi|516597|gb|AAA33027.1| ATP/ADP translocator [Parachlorella kessleri]
TR25973|c0_g1_i1	0	0	0	2.59	6.09	0	0	alcohol dehydrogenase	gi|398411236|ref|XP_003856960.1|hypothetical protein MYCGRDRAFT_67342 [Zymoseptoria tritici IPO323] gi|339476845|gb|EGP91936.1| hypothetical protein MYCGRDRAFT_67342 [Zymoseptoria tritici IPO323]
Mj_1_GCCAAT_L005_R1_001_(paired)_trimmed_(paired)_contig_90111	0	0	0	4.88	6.57	0	0.14	peptidyl-prolyl cis-trans isomerase	gi|398408832|ref|XP_003855881.1|hypothetical protein MYCGRDRAFT_64952 [Zymoseptoria tritici IPO323] gi|339475766|gb|EGP90857.1| hypothetical protein MYCGRDRAFT_64952 [Zymoseptoria tritici IPO323]
TR110405|c0_g1_i1	0	0	0	6.01	11.03	0	0	propanediol utilization protein	gi|398408818|ref|XP_003855874.1|hypothetical protein MYCGRDRAFT_28809, partial [Zymoseptoria tritici IPO323] gi|339475759|gb|EGP90850.1| hypothetical protein MYCGRDRAFT_28809 [Zymoseptoria tritici IPO323]
TR2906|c0_g1_i1	0	0	0	0.8	6.37	0.28	0	propanediol utilization protein	gi|398408818|ref|XP_003855874.1|hypothetical protein MYCGRDRAFT_28809, partial [Zymoseptoria tritici IPO323] gi|339475759|gb|EGP90850.1| hypothetical protein MYCGRDRAFT_28809 [Zymoseptoria tritici IPO323]
TR95948|c0_g1_i1	0	0	0	2.28	6.43	0.32	0	propanediol utilization protein	gi|398408818|ref|XP_003855874.1|hypothetical protein MYCGRDRAFT_28809, partial [Zymoseptoria tritici IPO323] gi|339475759|gb|EGP90850.1| hypothetical protein MYCGRDRAFT_28809 [Zymoseptoria tritici IPO323]
TR67057|c1_g1_i1	0	0	0	3.3	12.34	0.07	0	btb poz-like protein	gi|398406487|ref|XP_003854709.1|hypothetical protein MYCGRDRAFT_103011 [Zymoseptoria tritici IPO323] gi|339474593|gb|EGP89685.1| hypothetical protein MYCGRDRAFT_103011 [Zymoseptoria tritici IPO323]
TR112662|c0_g1_i1	0	0	0	3.56	5.69	0.25	0	opsin-1	gi|398398493|ref|XP_003852704.1|hypothetical protein MYCGRDRAFT_104409 [Zymoseptoria tritici IPO323] gi|339472585|gb|EGP87680.1| hypothetical protein MYCGRDRAFT_104409 [Zymoseptoria tritici IPO323]
TR50076|c2_g1_i1	0	0	0	6.68	6.05	0.18	0	opsin-1	gi|398398493|ref|XP_003852704.1|hypothetical protein MYCGRDRAFT_104409 [Zymoseptoria tritici IPO323] gi|339472585|gb|EGP87680.1| hypothetical protein MYCGRDRAFT_104409 [Zymoseptoria tritici IPO323]
TR50076|c2_g1_i2	0	0	0	2.92	5.76	0	0	opsin-1	gi|398398493|ref|XP_003852704.1|hypothetical protein MYCGRDRAFT_104409 [Zymoseptoria tritici IPO323] gi|339472585|gb|EGP87680.1| hypothetical protein MYCGRDRAFT_104409 [Zymoseptoria tritici IPO323]
TR50076|c2_g1_i6	0	0	0	3.5	5.33	0	0	opsin-1	gi|398398493|ref|XP_003852704.1|hypothetical protein MYCGRDRAFT_104409 [Zymoseptoria tritici IPO323] gi|339472585|gb|EGP87680.1| hypothetical protein MYCGRDRAFT_104409 [Zymoseptoria tritici IPO323]
TR69456|c1_g1_i5	0	0	0	3.31	7.7	0.27	0	tpa_inf: gpr1 fun34 -class plasma membrane protein	gi|398398241|ref|XP_003852578.1|hypothetical protein MYCGRDRAFT_42411 [Zymoseptoria tritici IPO323] gi|339472459|gb|EGP87554.1| hypothetical protein MYCGRDRAFT_42411 [Zymoseptoria tritici IPO323]
TR69456|c1_g1_i6	0	0	0	1.55	5.99	0.12	0	tpa_inf: gpr1 fun34 -class plasma membrane protein	gi|398398241|ref|XP_003852578.1|hypothetical protein MYCGRDRAFT_42411 [Zymoseptoria tritici IPO323] gi|339472459|gb|EGP87554.1| hypothetical protein MYCGRDRAFT_42411 [Zymoseptoria tritici IPO323]
TR47496|c1_g1_i2	0	0	0	2.66	5.94	0.46	0	plasma membrane h+-atpase pma1	gi|398397503|ref|XP_003852209.1|H(+)-exporting P2-type ATPase [Zymoseptoria tritici IPO323] gi|339472090|gb|EGP87185.1| hypothetical protein MYCGRDRAFT_59052 [Zymoseptoria tritici IPO323]
C969056	0	0	0	3.41	6.35	0.07	0.06	steroid monooxygenase	gi|398396862|ref|XP_003851889.1|hypothetical protein MYCGRDRAFT_43176 [Zymoseptoria tritici IPO323] gi|339471769|gb|EGP86865.1| hypothetical protein MYCGRDRAFT_43176 [Zymoseptoria tritici IPO323]
TR27217|c0_g1_i1	0	0	0	2.27	5.56	0.32	0	60s ribosomal protein l19	gi|398396152|ref|XP_003851534.1|60S ribosomal protein L19 [Zymoseptoria tritici IPO323] gi|339471414|gb|EGP86510.1| hypothetical protein MYCGRDRAFT_104898 [Zymoseptoria tritici IPO323]
Mj_1_GCCAAT_L005_R1_001_(paired)_trimmed_(paired)_contig_95940	0	0	0	0.39	6.26	0	0	#NAME?	gi|398393826|ref|XP_003850372.1|hypothetical protein MYCGRDRAFT_61630 [Zymoseptoria tritici IPO323] gi|339470250|gb|EGP85348.1| hypothetical protein MYCGRDRAFT_61630 [Zymoseptoria tritici IPO323]
TR38219|c0_g1_i1	0	0	0	3.13	10.8	0.24	0	cipc-like antibiotic response protein	gi|398393826|ref|XP_003850372.1|hypothetical protein MYCGRDRAFT_61630 [Zymoseptoria tritici IPO323] gi|339470250|gb|EGP85348.1| hypothetical protein MYCGRDRAFT_61630 [Zymoseptoria tritici IPO323]
Mj_1_GCCAAT_L005_R1_001_(paired)_trimmed_(paired)_contig_93016	0	0	0	3.45	5.52	0	0	hypothetical protein MYCGRDRAFT_46257	gi|398393512|ref|XP_003850215.1|hypothetical protein MYCGRDRAFT_46257 [Zymoseptoria tritici IPO323] gi|339470093|gb|EGP85191.1| hypothetical protein MYCGRDRAFT_46257 [Zymoseptoria tritici IPO323]
TR38489|c0_g1_i1	0	0	0	3.77	6.13	0.48	1.28	hypothetical protein MYCGRDRAFT_46257	gi|398393512|ref|XP_003850215.1|hypothetical protein MYCGRDRAFT_46257 [Zymoseptoria tritici IPO323] gi|339470093|gb|EGP85191.1| hypothetical protein MYCGRDRAFT_46257 [Zymoseptoria tritici IPO323]
TR21073|c0_g1_i1	0	0	0	2.95	6.58	0	0	alcohol dehydrogenase	gi|398392523|ref|XP_003849721.1|hypothetical protein MYCGRDRAFT_101210 [Zymoseptoria tritici IPO323] gi|339469598|gb|EGP84697.1| hypothetical protein MYCGRDRAFT_101210 [Zymoseptoria tritici IPO323]
TR68882|c2_g1_i1	0	0	0	7.93	10.94	0	0	alcohol dehydrogenase	gi|398392523|ref|XP_003849721.1|hypothetical protein MYCGRDRAFT_101210 [Zymoseptoria tritici IPO323] gi|339469598|gb|EGP84697.1| hypothetical protein MYCGRDRAFT_101210 [Zymoseptoria tritici IPO323]
TR68882|c2_g1_i10	0	0	0	5.65	18.88	0.36	0	alcohol dehydrogenase	gi|398392523|ref|XP_003849721.1|hypothetical protein MYCGRDRAFT_101210 [Zymoseptoria tritici IPO323] gi|339469598|gb|EGP84697.1| hypothetical protein MYCGRDRAFT_101210 [Zymoseptoria tritici IPO323]
TR68882|c2_g1_i2	0	0	0	8.58	15.88	0	0.18	alcohol dehydrogenase 1	gi|398392523|ref|XP_003849721.1|hypothetical protein MYCGRDRAFT_101210 [Zymoseptoria tritici IPO323] gi|339469598|gb|EGP84697.1| hypothetical protein MYCGRDRAFT_101210 [Zymoseptoria tritici IPO323]
TR68882|c2_g1_i4	0	0	0	6.4	13.42	0.41	0	alcohol dehydrogenase	gi|398392523|ref|XP_003849721.1|hypothetical protein MYCGRDRAFT_101210 [Zymoseptoria tritici IPO323] gi|339469598|gb|EGP84697.1| hypothetical protein MYCGRDRAFT_101210 [Zymoseptoria tritici IPO323]
TR76723|c3_g2_i4	0	0	0	2.8	5.6	0.73	0	alcohol dehydrogenase 1	gi|398392523|ref|XP_003849721.1|hypothetical protein MYCGRDRAFT_101210 [Zymoseptoria tritici IPO323] gi|339469598|gb|EGP84697.1| hypothetical protein MYCGRDRAFT_101210 [Zymoseptoria tritici IPO323]
C955526	0	0	0	10.09	3.71	0	0	allergen	gi|398391699|ref|XP_003849309.1|hypothetical protein MYCGRDRAFT_105661 [Zymoseptoria tritici IPO323] gi|339469186|gb|EGP84285.1| hypothetical protein MYCGRDRAFT_105661 [Zymoseptoria tritici IPO323]
Mj_1_GCCAAT_L005_R1_001_(paired)_trimmed_(paired)_contig_89496	0	0	0	3.52	7.05	0	0	allergen	gi|398391699|ref|XP_003849309.1|hypothetical protein MYCGRDRAFT_105661 [Zymoseptoria tritici IPO323] gi|339469186|gb|EGP84285.1| hypothetical protein MYCGRDRAFT_105661 [Zymoseptoria tritici IPO323]
Mj_1_GCCAAT_L005_R1_001_(paired)_trimmed_(paired)_contig_94300	0	0	0	1.71	5	0.13	0	allergen	gi|398391699|ref|XP_003849309.1|hypothetical protein MYCGRDRAFT_105661 [Zymoseptoria tritici IPO323] gi|339469186|gb|EGP84285.1| hypothetical protein MYCGRDRAFT_105661 [Zymoseptoria tritici IPO323]
TR45380|c0_g1_i1	0	0	0	1.83	5.19	0	0	allergen	gi|398391699|ref|XP_003849309.1|hypothetical protein MYCGRDRAFT_105661 [Zymoseptoria tritici IPO323] gi|339469186|gb|EGP84285.1| hypothetical protein MYCGRDRAFT_105661 [Zymoseptoria tritici IPO323]
TR52360|c1_g1_i3	0	0	0	7.24	2.79	0	0	hypothetical protein MYCGRDRAFT_105661	gi|398391699|ref|XP_003849309.1|hypothetical protein MYCGRDRAFT_105661 [Zymoseptoria tritici IPO323] gi|339469186|gb|EGP84285.1| hypothetical protein MYCGRDRAFT_105661 [Zymoseptoria tritici IPO323]
TR58202|c0_g1_i1	0	0	0	4.33	9.45	0	0	hypothetical protein MYCGRDRAFT_105661	gi|398391699|ref|XP_003849309.1|hypothetical protein MYCGRDRAFT_105661 [Zymoseptoria tritici IPO323] gi|339469186|gb|EGP84285.1| hypothetical protein MYCGRDRAFT_105661 [Zymoseptoria tritici IPO323]
TR9951|c0_g1_i1	0	0	0	9.69	21.32	0.34	0	allergen	gi|398391699|ref|XP_003849309.1|hypothetical protein MYCGRDRAFT_105661 [Zymoseptoria tritici IPO323] gi|339469186|gb|EGP84285.1| hypothetical protein MYCGRDRAFT_105661 [Zymoseptoria tritici IPO323]
TR64531|c0_g5_i1	0	0	0	8.53	9.69	0	0	histone h2a	gi|398390199|ref|XP_003848560.1|histone 2A [Zymoseptoria tritici IPO323] gi|339468435|gb|EGP83536.1| histone 2A [Zymoseptoria tritici IPO323]
TR64531|c0_g5_i2	0	0	0	2.38	6.16	0	0	histone h2a	gi|398390199|ref|XP_003848560.1|histone 2A [Zymoseptoria tritici IPO323] gi|339468435|gb|EGP83536.1| histone 2A [Zymoseptoria tritici IPO323]
C917958	0	0	0	3.05	5.73	0	0	40s ribosomal protein s20	gi|398390187|ref|XP_003848554.1|40S ribosomal protein S20 [Zymoseptoria tritici IPO323] gi|339468429|gb|EGP83530.1| hypothetical protein MYCGRDRAFT_88095 [Zymoseptoria tritici IPO323]
TR49616|c1_g1_i4	0	0	0	2.82	5.05	0	0	histone h2b	gi|398389909|ref|XP_003848415.1|histone 2B [Zymoseptoria tritici IPO323] gi|339468290|gb|EGP83391.1| histone 2B [Zymoseptoria tritici IPO323]
TR44257|c0_g3_i1	0	0	0	12.21	28.89	0.66	0	chaperone heat shock protein	gi|398389783|ref|XP_003848352.1|hypothetical protein MYCGRDRAFT_63646 [Zymoseptoria tritici IPO323] gi|339468227|gb|EGP83328.1| hypothetical protein MYCGRDRAFT_63646 [Zymoseptoria tritici IPO323]
TR65566|c1_g1_i1	0	0	0	6.02	12.19	0	0	chaperone heat shock protein	gi|398389783|ref|XP_003848352.1|hypothetical protein MYCGRDRAFT_63646 [Zymoseptoria tritici IPO323] gi|339468227|gb|EGP83328.1| hypothetical protein MYCGRDRAFT_63646 [Zymoseptoria tritici IPO323]
TR16962|c0_g1_i1	0	0	0	2.04	5.55	0.16	0	glutathione s-transferase	gi|398388557|ref|XP_003847740.1|hypothetical protein MYCGRDRAFT_77856 [Zymoseptoria tritici IPO323] gi|339467613|gb|EGP82716.1| hypothetical protein MYCGRDRAFT_77856 [Zymoseptoria tritici IPO323]
TR17801|c0_g1_i1	0	0	0	1.87	5.27	0	0	glutathione s-transferase-like protein	gi|398388557|ref|XP_003847740.1|hypothetical protein MYCGRDRAFT_77856 [Zymoseptoria tritici IPO323] gi|339467613|gb|EGP82716.1| hypothetical protein MYCGRDRAFT_77856 [Zymoseptoria tritici IPO323]
TR76537|c2_g2_i18	0	0	0	4.36	5.96	0.31	0	elongation factor 1-alpha	gi|397781880|gb|AFO66284.1|elongation factor-1a [Pyrenophora teres f. maculata]
TR76537|c2_g2_i4	0	0	0	3.74	5.29	0.22	0.19	elongation factor 1-alpha	gi|397781880|gb|AFO66284.1|elongation factor-1a [Pyrenophora teres f. maculata]
TR78195|c1_g3_i11	0	0	0	7.22	8.7	0	0.36	translation elongation factor partial	gi|397781880|gb|AFO66284.1|elongation factor-1a [Pyrenophora teres f. maculata]
Mj_1_GCCAAT_L005_R1_001_(paired)_trimmed_(paired)_contig_3378	21.55	20.6	35.04	76.8	62.29	177.17	48.87	abc transporter family protein	gi|397770484|gb|AFO64340.1|ABC transporter GCN1 [Hevea brasiliensis]
TR77849|c2_g2_i2	23.83	21.38	36.48	84.23	70.81	178.17	49.76	abc transporter family protein	gi|397770484|gb|AFO64340.1|ABC transporter GCN1 [Hevea brasiliensis]
scaffold12587	6.58	3.9	4.72	3.96	4.7	2.95	3.89	nadp-dependent d-sorbitol-6-phosphate dehydrogenase	gi|397746965|gb|AFO63538.1|NADPH-dependent mannose-6-phosphate reductase [Gossypium hirsutum]
TR72105|c0_g1_i2	8.12	3.54	12.04	8.14	10.83	8.15	19.01	mads-box transcription factor 18	gi|397133609|gb|AFO10123.1|MADS-box domain protein [Camellia sinensis]
TR72105|c1_g3_i2	3.54	2.37	6.25	6.46	8.46	6.09	11.87	flowering locus c-like protein	gi|397133609|gb|AFO10123.1|MADS-box domain protein [Camellia sinensis]
Mj_1_GCCAAT_L005_R1_001_(paired)_trimmed_(paired)_contig_86886	0	0	0.11	4.48	6.54	0.1	0.18	peroxisomal catalase	gi|396500981|ref|XP_003845863.1|similar to peroxisomal catalase [Leptosphaeria maculans JN3] gi|312222444|emb|CBY02384.1| similar to peroxisomal catalase [Leptosphaeria maculans JN3]
Mj_1_GCCAAT_L005_R1_001_(paired)_trimmed_(paired)_contig_87583	0	0	0.28	5.23	4.92	0.26	0	peroxisomal catalase	gi|396500981|ref|XP_003845863.1|similar to peroxisomal catalase [Leptosphaeria maculans JN3] gi|312222444|emb|CBY02384.1| similar to peroxisomal catalase [Leptosphaeria maculans JN3]
TR36591|c0_g1_i1	0	0.24	0.59	2.79	5.25	0.28	0	60s ribosomal protein l44	gi|396500717|ref|XP_003845789.1|similar to 60S ribosomal protein L44 [Leptosphaeria maculans JN3] gi|312222370|emb|CBY02310.1| similar to 60S ribosomal protein L44 [Leptosphaeria maculans JN3]
TR43012|c0_g1_i1	0	0	0	3.41	6.55	0.27	0	aspartic endopeptidase pep2	gi|396499231|ref|XP_003845423.1|similar to Vacuolar aspartyl protease (proteinase A) [Leptosphaeria maculans JN3] gi|21914374|gb|AAM81358.1|AF522873_1 aspartyl proteinase [Leptosphaeria maculans] gi|312222004|emb|CBY01944.1| similar to Vacuolar aspartyl protease (proteinase A) [Leptosphaeria maculans JN3]
TR50612|c0_g2_i1	0	0	0	4.8	8	0.26	0	mannitol dehydrogenase	gi|396497613|ref|XP_003845019.1|similar to L-xylulose reductase [Leptosphaeria maculans JN3] gi|312221600|emb|CBY01540.1| similar to L-xylulose reductase [Leptosphaeria maculans JN3]
TR81160|c0_g1_i1	0	0	0	3.19	6	0	0	60s ribosomal protein l33	gi|396495264|ref|XP_003844504.1|hypothetical protein LEMA_P021550.1 [Leptosphaeria maculans JN3] gi|312221084|emb|CBY01025.1| hypothetical protein LEMA_P021550.1 [Leptosphaeria maculans JN3]
Mj_1_GCCAAT_L005_R1_001_(paired)_trimmed_(paired)_contig_87868	0	0	0.38	5.9	6.53	0.27	0	exoglucanase 3 precursor	gi|396494299|ref|XP_003844271.1|similar to cellobiohydrolase II precursor [Leptosphaeria maculans JN3] gi|312220851|emb|CBY00792.1| similar to cellobiohydrolase II precursor [Leptosphaeria maculans JN3]
Mj_1_GCCAAT_L005_R1_001_(paired)_trimmed_(paired)_contig_96696	0	0	0	5.09	0.37	0	0.49	glutathione-dependent formaldehyde-activating	gi|396492821|ref|XP_003843889.1|similar to glutathione-dependent formaldehyde-activating [Leptosphaeria maculans JN3] gi|312220469|emb|CBY00410.1| similar to glutathione-dependent formaldehyde-activating [Leptosphaeria maculans JN3]
TR49401|c0_g1_i1	0	0	0	6.8	31.38	0.68	0.2	glutathione-dependent formaldehyde-activating	gi|396492821|ref|XP_003843889.1|similar to glutathione-dependent formaldehyde-activating [Leptosphaeria maculans JN3] gi|312220469|emb|CBY00410.1| similar to glutathione-dependent formaldehyde-activating [Leptosphaeria maculans JN3]
TR54475|c2_g5_i2	0	0	0	2.56	8.04	0	0	40s ribosomal protein s18	gi|396489279|ref|XP_003843065.1|hypothetical protein LEMA_P088250.1 [Leptosphaeria maculans JN3] gi|312219643|emb|CBX99586.1| hypothetical protein LEMA_P088250.1 [Leptosphaeria maculans JN3]
TR39124|c0_g1_i1	0	0	0	6.1	0.68	0	0	60s ribosomal protein l5	gi|396485824|ref|XP_003842266.1|similar to 60S ribosomal protein L5 [Leptosphaeria maculans JN3] gi|312218842|emb|CBX98787.1| similar to 60S ribosomal protein L5 [Leptosphaeria maculans JN3]
TR31292|c0_g1_i1	0	0	0.23	9.61	22.47	0.22	0	predicted protein	gi|396485527|ref|XP_003842193.1|predicted protein [Leptosphaeria maculans JN3] gi|312218769|emb|CBX98714.1| predicted protein [Leptosphaeria maculans JN3]
TR37769|c0_g1_i1	0	0.23	0	7.29	9.39	0.27	0.24	40s ribosomal protein s20	gi|396483910|ref|XP_003841819.1|similar to 40s ribosomal protein s20 [Leptosphaeria maculans JN3] gi|312218394|emb|CBX98340.1| similar to 40s ribosomal protein s20 [Leptosphaeria maculans JN3]
TR81457|c0_g1_i1	0	0	0	4.06	6.69	0	0	40s ribosomal protein s26	gi|396483811|ref|XP_003841795.1|hypothetical protein LEMA_P097250.1 [Leptosphaeria maculans JN3] gi|312218370|emb|CBX98316.1| hypothetical protein LEMA_P097250.1 [Leptosphaeria maculans JN3]
TR46870|c1_g1_i1	0	0	0	1.84	6.9	0	0	hypothetical protein LEMA_P095170.1	gi|396482950|ref|XP_003841587.1|hypothetical protein LEMA_P095170.1 [Leptosphaeria maculans JN3] gi|312218162|emb|CBX98108.1| hypothetical protein LEMA_P095170.1 [Leptosphaeria maculans JN3]
Mj_1_GCCAAT_L005_R1_001_(paired)_trimmed_(paired)_contig_91029	0	0	0	13.11	17.41	0	0	rna binding protein	gi|396481730|ref|XP_003841309.1|similar to RNA binding protein [Leptosphaeria maculans JN3] gi|312217883|emb|CBX97830.1| similar to RNA binding protein [Leptosphaeria maculans JN3]
Mj_1_GCCAAT_L005_R1_001_(paired)_trimmed_(paired)_contig_87244	0	0	0.11	4.32	5.75	0.1	0	zinc knuckle domain protein	gi|396477991|ref|XP_003840426.1|similar to zinc knuckle domain-containing protein [Leptosphaeria maculans JN3] gi|312216998|emb|CBX96947.1| similar to zinc knuckle domain-containing protein [Leptosphaeria maculans JN3]
Mj_1_GCCAAT_L005_R1_001_(paired)_trimmed_(paired)_contig_51163	0.25	0.24	0	142.75	119.76	0.55	3.7	rrna intron-encoded homing endonuclease	gi|396475785|ref|XP_003839870.1|predicted protein [Leptosphaeria maculans JN3] gi|312216440|emb|CBX96391.1| predicted protein [Leptosphaeria maculans JN3]
Mj_1_GCCAAT_L005_R1_001_(paired)_trimmed_(paired)_contig_84761	0	0	0.21	5.1	4.27	0.2	0	60s ribosomal protein l18	gi|396473449|ref|XP_003839342.1|similar to 60S ribosomal protein L18 [Leptosphaeria maculans JN3] gi|312215911|emb|CBX95863.1| similar to 60S ribosomal protein L18 [Leptosphaeria maculans JN3]
TR124352|c0_g1_i1	0	0	0	3.42	8.44	0.3	0	hypothetical protein LEMA_P030000.1	gi|396473383|ref|XP_003839327.1|hypothetical protein LEMA_P030000.1 [Leptosphaeria maculans JN3] gi|312215896|emb|CBX95848.1| hypothetical protein LEMA_P030000.1 [Leptosphaeria maculans JN3]
TR35721|c0_g1_i2	0	0	0	4.56	5.15	0	0	40s ribosomal protein s15	gi|396472247|ref|XP_003839060.1|similar to 40s ribosomal protein S15 [Leptosphaeria maculans JN3] gi|312215629|emb|CBX95581.1| similar to 40s ribosomal protein S15 [Leptosphaeria maculans JN3]
Mj_1_GCCAAT_L005_R1_001_(paired)_trimmed_(paired)_contig_89132	0	0	0.16	3.03	6.33	0.15	0	cortical patch protein	gi|396469894|ref|XP_003838517.1|hypothetical protein LEMA_P114530.1 [Leptosphaeria maculans JN3] gi|312215085|emb|CBX95038.1| hypothetical protein LEMA_P114530.1 [Leptosphaeria maculans JN3]
scaffold11515	0	0	0	4.78	5.75	0	0	40s ribosomal protein s9	gi|396468840|ref|XP_003838270.1|similar to 40S ribosomal protein S9 [Leptosphaeria maculans JN3] gi|312214837|emb|CBX94791.1| similar to 40S ribosomal protein S9 [Leptosphaeria maculans JN3]
TR54750|c0_g1_i1	0	0	0	10.26	16.48	0.13	0	non-classical export protein	gi|396466904|ref|XP_003837794.1|hypothetical protein LEMA_P121140.1 [Leptosphaeria maculans JN3] gi|312214358|emb|CBX94350.1| hypothetical protein LEMA_P121140.1 [Leptosphaeria maculans JN3]
Mj_1_GCCAAT_L005_R1_001_(paired)_trimmed_(paired)_contig_86332	0	0	0.31	6.27	2.75	0.29	0.26	60s ribosomal protein l2	gi|396466269|ref|XP_003837654.1|similar to 60S ribosomal protein L2/L8 [Leptosphaeria maculans JN3] gi|312214216|emb|CBX94210.1| similar to 60S ribosomal protein L2/L8 [Leptosphaeria maculans JN3]
TR32939|c0_g1_i3	0	0.33	0	5.5	7.25	0	0	60s ribosomal protein l9	gi|396465638|ref|XP_003837427.1|similar to 60s ribosomal protein l9 [Leptosphaeria maculans JN3] gi|312213985|emb|CBX93987.1| similar to 60s ribosomal protein l9 [Leptosphaeria maculans JN3]
Mj_1_GCCAAT_L005_R1_001_(paired)_trimmed_(paired)_contig_88380	0	0	0.46	2.76	5.78	0	0	60s ribosomal protein l6	gi|396465620|ref|XP_003837418.1|similar to 60S ribosomal protein L6 [Leptosphaeria maculans JN3] gi|312213976|emb|CBX93978.1| similar to 60S ribosomal protein L6 [Leptosphaeria maculans JN3]
TR40573|c0_g1_i1	0	0	0.44	5	4.98	0.21	0	hypothetical protein LEMA_P033300.1	gi|396464976|ref|XP_003837096.1|hypothetical protein LEMA_P033300.1 [Leptosphaeria maculans JN3] gi|312213654|emb|CBX93656.1| hypothetical protein LEMA_P033300.1 [Leptosphaeria maculans JN3]
TR60470|c0_g1_i1	0	0	0	10.3	17.65	0.33	0	hypothetical protein LEMA_P044580.1	gi|396464623|ref|XP_003836922.1|hypothetical protein LEMA_P044580.1 [Leptosphaeria maculans JN3] gi|312213475|emb|CBX93557.1| hypothetical protein LEMA_P044580.1 [Leptosphaeria maculans JN3]
TR41987|c0_g1_i1	0	0	0	7.79	14.13	0.2	0	hypothetical protein LEMA_P043150.1	gi|396464337|ref|XP_003836779.1|hypothetical protein LEMA_P043150.1 [Leptosphaeria maculans JN3] gi|312213332|emb|CBX93414.1| hypothetical protein LEMA_P043150.1 [Leptosphaeria maculans JN3]
Mj_1_GCCAAT_L005_R1_001_(paired)_trimmed_(paired)_contig_90574	0	0	0	5.39	9.9	0.38	0.17	hypothetical protein LEMA_P040130.1	gi|396463733|ref|XP_003836477.1|hypothetical protein LEMA_P040130.1 [Leptosphaeria maculans JN3] gi|312213030|emb|CBX93112.1| hypothetical protein LEMA_P040130.1 [Leptosphaeria maculans JN3]
C929414	0	0	0	1.58	5.05	0.22	0	40s ribosomal protein s8	gi|396463683|ref|XP_003836452.1|similar to 40S ribosomal protein S8 [Leptosphaeria maculans JN3] gi|312213005|emb|CBX93087.1| similar to 40S ribosomal protein S8 [Leptosphaeria maculans JN3]
TR28977|c0_g1_i1	0	0	0	2.43	5.84	0.15	0	covalently-linked cell wall protein	gi|396463551|ref|XP_003836386.1|similar to covalently-linked cell wall protein [Leptosphaeria maculans JN3] gi|312212939|emb|CBX93021.1| similar to covalently-linked cell wall protein [Leptosphaeria maculans JN3]
C913093	0	0	0	9.07	0.39	0	0.51	chaperone heat shock protein hsp12	gi|396463529|ref|XP_003836375.1|similar to chaperone/heat shock protein Hsp12 [Leptosphaeria maculans JN3] gi|312212928|emb|CBX93010.1| similar to chaperone/heat shock protein Hsp12 [Leptosphaeria maculans JN3]
Mj_1_GCCAAT_L005_R1_001_(paired)_trimmed_(paired)_contig_95170	0	0	0	0.74	8.03	0	0	chaperone heat shock protein hsp12	gi|396463529|ref|XP_003836375.1|similar to chaperone/heat shock protein Hsp12 [Leptosphaeria maculans JN3] gi|312212928|emb|CBX93010.1| similar to chaperone/heat shock protein Hsp12 [Leptosphaeria maculans JN3]
TR18269|c0_g1_i1	0	0	0	3.42	6.43	0	0	chaperone heat shock protein hsp12	gi|396463529|ref|XP_003836375.1|similar to chaperone/heat shock protein Hsp12 [Leptosphaeria maculans JN3] gi|312212928|emb|CBX93010.1| similar to chaperone/heat shock protein Hsp12 [Leptosphaeria maculans JN3]
TR74795|c0_g1_i3	0	0	0	2.64	6.37	0.12	0	allergen-like protein	gi|396463300|ref|XP_003836261.1|hypothetical protein LEMA_P056020.1 [Leptosphaeria maculans JN3] gi|312212813|emb|CBX92896.1| hypothetical protein LEMA_P056020.1 [Leptosphaeria maculans JN3]
TR74795|c1_g1_i1	0	0	0	3.36	5.5	0.24	0	allergen-like protein	gi|396463300|ref|XP_003836261.1|hypothetical protein LEMA_P056020.1 [Leptosphaeria maculans JN3] gi|312212813|emb|CBX92896.1| hypothetical protein LEMA_P056020.1 [Leptosphaeria maculans JN3]
TR74795|c1_g1_i6	0	0	0	6.43	2.89	0	0	allergen-like protein	gi|396463300|ref|XP_003836261.1|hypothetical protein LEMA_P056020.1 [Leptosphaeria maculans JN3] gi|312212813|emb|CBX92896.1| hypothetical protein LEMA_P056020.1 [Leptosphaeria maculans JN3]
Mj_1_GCCAAT_L005_R1_001_(paired)_trimmed_(paired)_contig_91781	0	0	0	4.35	5.36	0	0	60s ribosomal protein l35	gi|396462716|ref|XP_003835969.1|similar to 60S ribosomal protein L35 [Leptosphaeria maculans JN3] gi|312212521|emb|CBX92604.1| similar to 60S ribosomal protein L35 [Leptosphaeria maculans JN3]
TR53089|c3_g2_i1	0	0	0	6.61	8.04	0.58	0	60s ribosomal protein l10a	gi|396462458|ref|XP_003835840.1|similar to 60s ribosomal protein L10A [Leptosphaeria maculans JN3] gi|312212392|emb|CBX92475.1| similar to 60s ribosomal protein L10A [Leptosphaeria maculans JN3]
TR25547|c0_g1_i2	0	0	0	3.63	5.7	0	0	60s acidic ribosomal protein p1	gi|396461879|ref|XP_003835551.1|similar to 60S acidic ribosomal protein P1 [Leptosphaeria maculans JN3] gi|312212102|emb|CBX92186.1| similar to 60S acidic ribosomal protein P1 [Leptosphaeria maculans JN3]
TR49235|c1_g1_i2	0	0	0	4.19	8.54	0	0	predicted protein	gi|396461351|ref|XP_003835287.1|predicted protein [Leptosphaeria maculans JN3] gi|312211838|emb|CBX91922.1| predicted protein [Leptosphaeria maculans JN3]
TR35923|c0_g1_i1	0	0	0	2.56	7.71	0	0	f1f0-atp synthase regulatory factor stf2	gi|396461157|ref|XP_003835190.1|predicted protein [Leptosphaeria maculans JN3] gi|312211741|emb|CBX91825.1| predicted protein [Leptosphaeria maculans JN3]
TR76537|c2_g2_i1	0	0	0	7.57	8.33	0.44	0.1	elongation factor 1-alpha	gi|396461042|ref|XP_003835133.1|similar to translation elongation factor 1 alpha [Leptosphaeria maculans JN3] gi|312211683|emb|CBX91768.1| similar to translation elongation factor 1 alpha [Leptosphaeria maculans JN3]
TR76537|c2_g2_i14	0	0	0	4.21	6.18	0.33	0.19	elongation factor 1-alpha	gi|396461042|ref|XP_003835133.1|similar to translation elongation factor 1 alpha [Leptosphaeria maculans JN3] gi|312211683|emb|CBX91768.1| similar to translation elongation factor 1 alpha [Leptosphaeria maculans JN3]
TR78195|c0_g2_i1	0	0.46	0	11.34	18.11	0	0.48	elongation factor 1-alpha	gi|396461042|ref|XP_003835133.1|similar to translation elongation factor 1 alpha [Leptosphaeria maculans JN3] gi|312211683|emb|CBX91768.1| similar to translation elongation factor 1 alpha [Leptosphaeria maculans JN3]
TR52649|c1_g1_i1	0	0	0	7.6	7.41	0.19	0	40s ribosomal protein s12	gi|396460990|ref|XP_003835107.1|similar to 40S ribosomal protein S12 [Leptosphaeria maculans JN3] gi|312211657|emb|CBX91742.1| similar to 40S ribosomal protein S12 [Leptosphaeria maculans JN3]
Mj_1_GCCAAT_L005_R1_001_(paired)_trimmed_(paired)_contig_96208	0	0	0	1.33	12.24	0	0	duf636 domain protein	gi|396460346|ref|XP_003834785.1|predicted protein [Leptosphaeria maculans JN3] gi|312211335|emb|CBX91420.1| predicted protein [Leptosphaeria maculans JN3]
Mj_1_GCCAAT_L005_R1_001_(paired)_trimmed_(paired)_contig_89360	0	0	0.21	5.29	8.65	0	0.17	peptidyl-prolyl cis-trans isomerase	gi|396459343|ref|XP_003834284.1|similar to peptidyl-prolyl cis-trans isomerase [Leptosphaeria maculans JN3] gi|312210833|emb|CBX90919.1| similar to peptidyl-prolyl cis-trans isomerase [Leptosphaeria maculans JN3]
TR47187|c0_g1_i1	0	0	0	12.33	15.4	0	0	peptidyl-prolyl cis-trans isomerase	gi|396459343|ref|XP_003834284.1|similar to peptidyl-prolyl cis-trans isomerase [Leptosphaeria maculans JN3] gi|312210833|emb|CBX90919.1| similar to peptidyl-prolyl cis-trans isomerase [Leptosphaeria maculans JN3]
Mj_1_GCCAAT_L005_R1_001_(paired)_trimmed_(paired)_contig_89815	0	0	0	10.19	6.37	0.08	0	exoglucanase 1 precursor	gi|396457830|ref|XP_003833528.1|similar to 1,4-beta-D-glucan cellobiohydrolase [Leptosphaeria maculans JN3] gi|312210076|emb|CBX90163.1| similar to 1,4-beta-D-glucan cellobiohydrolase [Leptosphaeria maculans JN3]
Mj_1_GCCAAT_L005_R1_001_(paired)_trimmed_(paired)_contig_2134	23.96	24.61	22.41	11.07	15.37	3.15	34.07	flavanone 3-hydroxylase	gi|395760140|gb|AFN70721.1|flavanone 3-hydroxylase [Ampelopsis grossedentata]
Mj_1_GCCAAT_L005_R1_001_(paired)_trimmed_(paired)_contig_14743	4.12	7.12	1.98	3.7	2.18	1.81	1.43	ribosomal protein s12	gi|394831161|ref|YP_006503815.1|ribosomal protein S12 (chloroplast) [Datura stramonium] gi|350996572|gb|AEQ37083.1| ribosomal protein S12 [Datura stramonium]
TR63973|c0_g1_i2	0	0	0	3.69	19.1	0.26	0	12 kda heat shock protein (glucose and lipid-regulated protein)	gi|392575475|gb|EIW68608.1|hypothetical protein TREMEDRAFT_57155 [Tremella mesenterica DSM 1558]
TR63973|c0_g1_i5	0	0	0	3.54	12.96	0	0	12 kda heat shock protein (glucose and lipid-regulated protein)	gi|392575475|gb|EIW68608.1|hypothetical protein TREMEDRAFT_57155 [Tremella mesenterica DSM 1558]
TR63973|c1_g1_i1	0	0	0	2.92	8.23	0.29	0	12 kda heat shock protein (glucose and lipid-regulated protein)	gi|392575475|gb|EIW68608.1|hypothetical protein TREMEDRAFT_57155 [Tremella mesenterica DSM 1558]
TR47729|c0_g1_i3	0	0	0	4.88	7.27	0	0	protein	gi|392574347|gb|EIW67483.1|hypothetical protein TREMEDRAFT_33295 [Tremella mesenterica DSM 1558] gi|392574355|gb|EIW67491.1| hypothetical protein TREMEDRAFT_33486 [Tremella mesenterica DSM 1558]
TR69054|c1_g2_i2	3.28	3.68	2.91	4.2	3.44	9.01	5.24	sucrose phosphate synthase	gi|3915023|sp|O22060.1|SPS1_CITUNRecName: Full=Probable sucrose-phosphate synthase 1; AltName: Full=UDP-glucose-fructose-phosphate glucosyltransferase 1 gi|2588888|dbj|BAA23213.1| sucrose-phosphate synthase [Citrus unshiu]
Mj_1_GCCAAT_L005_R1_001_(paired)_trimmed_(paired)_contig_105704	0	0	0	0	7.19	0	0	lipid transfer protein	gi|390985898|gb|AFM35695.1|nonspecific lipid transfer protein [Vitis pseudoreticulata]
Mj_1_GCCAAT_L005_R1_001_(paired)_trimmed_(paired)_contig_89998	0	0	0	10.27	12.08	0.22	0	pentatricopeptide repeat-containing protein mitochondrial-like	gi|390338472|ref|XP_798189.2|PREDICTED: pentatricopeptide repeat-containing protein 3, mitochondrial-like [Strongylocentrotus purpuratus]
TR73605|c0_g1_i7	1.29	1.23	5.32	3.59	1.69	1.25	2.86	dynamin-related protein 1a	gi|390136233|pdb|3T34|AChain A, Arabidopsis Thaliana Dynamin-Related Protein 1a (Atdrp1a) In Prefission State gi|390136234|pdb|3T34|B Chain B, Arabidopsis Thaliana Dynamin-Related Protein 1a (Atdrp1a) In Prefission State gi|390136235|pdb|3T35|A Chain A, Arabidopsis Thaliana Dynamin-Related Protein 1a In Postfission State gi|390136236|pdb|3T35|B Chain B, Arabidopsis Thaliana Dynamin-Related Protei…
TR73605|c0_g1_i9	4.62	2.69	6.86	2.23	1.8	1.33	2.57	dynamin-related protein 1a	gi|390136233|pdb|3T34|AChain A, Arabidopsis Thaliana Dynamin-Related Protein 1a (Atdrp1a) In Prefission State gi|390136234|pdb|3T34|B Chain B, Arabidopsis Thaliana Dynamin-Related Protein 1a (Atdrp1a) In Prefission State gi|390136235|pdb|3T35|A Chain A, Arabidopsis Thaliana Dynamin-Related Protein 1a In Postfission State gi|390136236|pdb|3T35|B Chain B, Arabidopsis Thaliana Dynamin-Related Protei…
TR47653|c0_g1_i1	278.75	309.36	449.17	288.4	308.31	211.01	324.18	triosephosphate isomerase	gi|390098824|gb|AFL48185.1|triose phosphate isomerase cytosolic isoform-like protein [Capsicum annuum]
TR75576|c2_g2_i11	0	0.09	0	2.75	6.28	1.82	0.18	abscisic acid 8 -hydroxylase 1-like	gi|388827891|gb|AFK79028.1|cytochrome P450 CYP707A67 [Bupleurum chinense]
TR75576|c2_g2_i9	0.07	0	0	3.9	5.52	0.68	0.2	abscisic acid 8 -hydroxylase 1-like	gi|388827891|gb|AFK79028.1|cytochrome P450 CYP707A67 [Bupleurum chinense]
TR56907|c0_g1_i1	71.97	32.55	48.06	21.27	31.62	5.39	29.94	pii protein	gi|3885941|gb|AAC78332.1|PII protein [Ricinus communis]
TR51744|c0_g1_i1	65.39	29.29	78.91	33.37	34.85	19	44.69	protein	gi|388522287|gb|AFK49205.1|unknown [Lotus japonicus]
scaffold12958	24.5	9.45	31.97	13.84	13.32	7.78	20.58	protein	gi|388522287|gb|AFK49205.1|unknown [Lotus japonicus]
Mj_1_GCCAAT_L005_R1_001_(paired)_trimmed_(paired)_contig_7348	18.4	14.24	18.37	12.94	13.03	7.07	18.49	60s ribosomal protein l22-like protein	gi|388521565|gb|AFK48844.1|unknown [Lotus japonicus]
TR49479|c0_g1_i1	5.05	1.9	1.49	5.72	4.31	3.8	4.09	ribose-phosphate pyrophosphokinase 1	gi|388520703|gb|AFK48413.1|unknown [Lotus japonicus]
TR55841|c0_g1_i1	25.57	27.26	55.05	47.44	59.47	42.8	53.69	protein	gi|388520377|gb|AFK48250.1|unknown [Lotus japonicus]
TR55841|c0_g1_i2	34.88	35.94	68.2	54.51	70.08	54.71	72.85	protein	gi|388520377|gb|AFK48250.1|unknown [Lotus japonicus]
TR69439|c0_g1_i4	12.26	10.98	17.15	12.39	14.06	9.34	13.55	nadh dehydrogenase	gi|388520273|gb|AFK48198.1|unknown [Lotus japonicus]
TR59414|c0_g1_i2	7.54	9.95	5.44	3.51	2.67	2.22	4.57	lipoic acid synthase	gi|388520169|gb|AFK48146.1|unknown [Medicago truncatula]
TR61044|c0_g1_i2	6.48	7.22	5.81	3.52	1.99	2.63	3.2	lipoic acid synthase	gi|388520169|gb|AFK48146.1|unknown [Medicago truncatula]
TR62381|c1_g1_i2	3.9	1.76	6.41	5.72	5.24	2.86	7.1	chloroplast processing peptidase	gi|388519903|gb|AFK48013.1|unknown [Lotus japonicus]
Mj_1_GCCAAT_L005_R1_001_(paired)_trimmed_(paired)_contig_388	0.74	0.24	0.58	1.17	1.46	9.77	1.21	act domain-containing protein 3	gi|388519119|gb|AFK47621.1|unknown [Lotus japonicus]
scaffold13045	4.25	8.09	3.24	2.54	4.65	0.7	2.72	flavonol synthase flavanone 3-	gi|388518317|gb|AFK47220.1|unknown [Lotus japonicus]
Mj_1_GCCAAT_L005_R1_001_(paired)_trimmed_(paired)_contig_419	20.23	24.34	13.04	7.98	10.22	8.16	19.19	grx_s14 - glutaredoxin subgroup ii	gi|388518093|gb|AFK47108.1|unknown [Lotus japonicus]
TR54846|c0_g1_i1	26.76	25.91	15.67	14.03	14.01	9.96	20.54	grx_s14 - glutaredoxin subgroup ii	gi|388518093|gb|AFK47108.1|unknown [Lotus japonicus]
TR54846|c0_g1_i2	25.91	25.79	15.47	11.73	12.93	9.74	17.17	grx_s14 - glutaredoxin subgroup ii	gi|388518093|gb|AFK47108.1|unknown [Lotus japonicus]
Mj_1_GCCAAT_L005_R1_001_(paired)_trimmed_(paired)_contig_194	5.53	2.47	3.72	12.55	14.53	6.4	5.01	low quality protein: upf0468 protein cg5343-like	gi|388517243|gb|AFK46683.1|unknown [Lotus japonicus]
TR74383|c0_g2_i5	4.84	3.31	4.64	7.03	9.14	4.15	6.2	low quality protein: upf0468 protein cg5343-like	gi|388517243|gb|AFK46683.1|unknown [Lotus japonicus]
Mj_1_GCCAAT_L005_R1_001_(paired)_trimmed_(paired)_contig_9577	9.62	7.59	5.44	1.02	0.96	0	7.72	pyruvate kinase	gi|388517047|gb|AFK46585.1|unknown [Lotus japonicus]
TR59210|c0_g1_i4	5.85	7.08	1.01	0.45	1.07	0	2.39	fk506 binding	gi|388514903|gb|AFK45513.1|unknown [Lotus japonicus]
TR60131|c0_g1_i3	12.93	13.7	3.07	1.07	1.45	0.64	2.48	fk506 binding	gi|388514903|gb|AFK45513.1|unknown [Lotus japonicus]
TR57782|c1_g1_i3	0	0	0.44	0	0.28	1.65	6.62	plant-specific domain tigr01589 family protein	gi|388513881|gb|AFK45002.1|unknown [Lotus japonicus]
TR57782|c1_g1_i4	0	0	1.32	0	0.48	2.83	7.87	plant-specific domain tigr01589 family protein	gi|388513881|gb|AFK45002.1|unknown [Lotus japonicus]
Mj_1_GCCAAT_L005_R1_001_(paired)_trimmed_(paired)_contig_2810	7.76	4.01	12.87	11.06	13.09	14.91	19.93	heavy-metal-associated domain-containing protein	gi|388513605|gb|AFK44864.1|unknown [Lotus japonicus]
scaffold13056	13.33	5.25	19.16	15.53	23.1	28.23	32.05	heavy-metal-associated domain-containing protein	gi|388513605|gb|AFK44864.1|unknown [Lotus japonicus]
TR53003|c0_g1_i2	2.71	2.11	3.04	5.67	6.27	4.79	5.95	protein	gi|388512091|gb|AFK44107.1|unknown [Lotus japonicus]
TR69087|c0_g2_i1	20.61	14.58	3.19	1.71	1.21	0.6	6.4	cmv 1a interacting protein 1	gi|388511995|gb|AFK44059.1|unknown [Medicago truncatula]
TR69087|c0_g2_i3	19.56	13.81	7.6	1.5	2.55	1.05	7.11	cmv 1a interacting protein 1	gi|388511995|gb|AFK44059.1|unknown [Medicago truncatula]
TR54758|c0_g1_i2	14.91	11.64	31.31	10.04	18.62	2.19	17.17	cytochrome b reductase	gi|388511491|gb|AFK43807.1|unknown [Lotus japonicus]
C907925	2.82	1.9	5.32	1.34	3.35	5.6	4.99	protein sec13 homolog	gi|388511445|gb|AFK43784.1|unknown [Lotus japonicus]
scaffold10898	0.41	0.16	0.77	4.93	3.3	1.18	29.08	protein	gi|388510212|gb|AFK43172.1|unknown [Medicago truncatula]
TR54470|c0_g1_i1	19.68	8.54	9.4	9.62	9.68	8.26	5.97	50s ribosomal protein l18	gi|388509934|gb|AFK43033.1|unknown [Lotus japonicus]
TR50574|c0_g1_i1	143.69	72.23	180.34	129.47	199.22	123.98	139.06	60s ribosomal protein l29-1	gi|388509690|gb|AFK42911.1|unknown [Medicago truncatula]
TR50574|c0_g1_i2	62.91	36.97	86.68	74.08	115.36	100.08	63.2	60s ribosomal protein l29-1	gi|388509690|gb|AFK42911.1|unknown [Medicago truncatula]
Mj_1_GCCAAT_L005_R1_001_(paired)_trimmed_(paired)_contig_12144	0.5	0.95	1.37	3.7	5.22	6.65	1.15	amino acid transporter	gi|388509686|gb|AFK42909.1|unknown [Lotus japonicus]
TR55896|c0_g1_i1	21.82	9.17	27.46	29.81	33.68	22.92	17.42	h aca ribonucleoprotein complex subunit 3-like protein	gi|388509584|gb|AFK42858.1|unknown [Lotus japonicus]
TR55896|c0_g1_i2	24.46	10.76	30.66	29.37	41.78	25.34	13.6	h aca ribonucleoprotein complex subunit 3-like protein	gi|388509584|gb|AFK42858.1|unknown [Lotus japonicus]
TR56395|c0_g1_i1	12.97	4.74	16.59	16.51	24.41	14.39	9.63	h aca ribonucleoprotein complex subunit 3-like protein	gi|388509584|gb|AFK42858.1|unknown [Lotus japonicus]
TR47156|c0_g1_i1	9.18	5.27	12.72	12.27	16.72	11.51	7.43	unknown	gi|388508884|gb|AFK42508.1|unknown [Lotus japonicus]
TR47156|c0_g1_i2	8.46	4.68	12.84	9.54	14.87	8.54	5.37	unknown	gi|388508884|gb|AFK42508.1|unknown [Lotus japonicus]
TR57310|c1_g2_i2	4.76	6.54	5.6	6.88	5.86	5.73	6.52	protein	gi|388508718|gb|AFK42425.1|unknown [Lotus japonicus]
TR55725|c3_g4_i3	6.5	4.98	11.17	8.47	13.26	10.08	10.42	polyubiquitin 2	gi|388508634|gb|AFK42383.1|unknown [Medicago truncatula]
TR71731|c0_g4_i3	10.54	6.08	17.12	9.22	9.22	10.88	12.35	transport protein particle subunit	gi|388508112|gb|AFK42122.1|unknown [Lotus japonicus]
TR61360|c0_g1_i1	2.04	1.17	23.1	4.39	33.09	0.23	24.82	glutathione s-	gi|388507750|gb|AFK41941.1|unknown [Lotus japonicus]
Mj_1_GCCAAT_L005_R1_001_(paired)_trimmed_(paired)_contig_24382	3.31	5.12	7.24	4.76	5.9	7	4.04	developmentally-regulated gtp-binding protein 1	gi|388507608|gb|AFK41870.1|unknown [Lotus japonicus]
TR64848|c0_g1_i1	5.45	8.34	5.57	5.92	10.72	4.46	8.76	2-on-2 hemoglobin	gi|388506100|gb|AFK41116.1|unknown [Medicago truncatula]
TR65647|c0_g1_i1	2.1	1.12	2.2	2.21	3.13	6.45	0.92	zn-finger containing protein	gi|388504524|gb|AFK40328.1|unknown [Medicago truncatula]
TR42929|c0_g1_i1	40.76	14.21	27.92	29.27	55.84	22.19	40.19	rna polymerase ii transcriptional coactivator kiwi	gi|388504274|gb|AFK40203.1|unknown [Lotus japonicus]
TR69552|c1_g1_i6	3.39	3.45	5.99	4.7	4.11	7.97	7.3	aldehyde dimeric nadp-preferring	gi|388504192|gb|AFK40162.1|unknown [Lotus japonicus]
TR55733|c0_g1_i1	73.14	74.61	199.48	130.1	190.11	162.36	110.48	eukaryotic translation initiation factor 1a-like	gi|388503528|gb|AFK39830.1|unknown [Lotus japonicus]
TR62862|c0_g1_i1	76.15	36.05	52.9	54.47	71.07	76.75	83.15	alba dna rna-binding protein	gi|388502700|gb|AFK39416.1|unknown [Lotus japonicus]
scaffold12593	66.84	27.9	45.21	49.18	59.87	63.94	70.79	ribonuclease p protein subunit p25	gi|388502700|gb|AFK39416.1|unknown [Lotus japonicus]
TR68790|c0_g4_i1	11.39	6	2.93	0.42	0.2	0.44	2.58	chalcone isomerase-like protein	gi|388502054|gb|AFK39093.1|unknown [Medicago truncatula]
TR44582|c1_g1_i1	102.19	77.58	186.25	212.2	59.84	187.13	80.61	s-adenosylmethionine synthetase	gi|388501380|gb|AFK38756.1|unknown [Medicago truncatula]
TR35443|c0_g1_i1	74.53	54.65	100.73	109.02	93.14	144.96	68.66	pinus taeda anonymous locus 2_4109_02 genomic sequence	gi|388501272|gb|AFK38702.1|unknown [Lotus japonicus]
TR45356|c0_g1_i1	22.98	27.99	136.51	70.18	40.3	43.6	19.3	pinus taeda anonymous locus 2_4109_02 genomic sequence	gi|388501272|gb|AFK38702.1|unknown [Lotus japonicus]
TR75777|c0_g2_i5	2.69	2.87	4.71	5.43	4.63	5.49	7.52	ghmp kinase family protein	gi|388501044|gb|AFK38588.1|unknown [Medicago truncatula]
TR75777|c0_g2_i7	2.27	1.75	4	5.3	5.85	6.71	5.32	ghmp kinase family protein	gi|388501044|gb|AFK38588.1|unknown [Medicago truncatula]
Mj_1_GCCAAT_L005_R1_001_(paired)_trimmed_(paired)_contig_61070	13.07	12.17	2.12	0.52	0.98	2.17	2.09	thylakoid membrane phosphoprotein 14 chloroplast	gi|388500696|gb|AFK38414.1|unknown [Lotus japonicus]
Mj_1_GCCAAT_L005_R1_001_(paired)_trimmed_(paired)_contig_4352	67.28	56.75	102.99	60.5	59.05	39.86	84.47	cytosolic malate dehydrogenase	gi|388500096|gb|AFK38114.1|unknown [Lotus japonicus]
TR52515|c0_g1_i1	15.55	11.04	39.49	16.01	28.96	13.35	27.2	malate dehydrogenase	gi|388500096|gb|AFK38114.1|unknown [Lotus japonicus]
TR52515|c0_g1_i2	12.88	8.98	31.53	13.81	24.08	11.12	23.41	malate dehydrogenase	gi|388500096|gb|AFK38114.1|unknown [Lotus japonicus]
scaffold1453	9.92	7.22	25.73	10.4	17.56	8.9	17.29	malate dehydrogenase	gi|388500096|gb|AFK38114.1|unknown [Lotus japonicus]
TR53587|c0_g1_i1	45.97	23.82	49.58	42.57	66.29	29.96	45.48	protein	gi|388498294|gb|AFK37213.1|unknown [Medicago truncatula]
TR73867|c2_g1_i8	5.04	7.12	13.69	8.73	10.9	7.27	6.88	7-dehydrocholesterol reductase	gi|388497924|gb|AFK37028.1|unknown [Lotus japonicus]
TR54361|c0_g1_i1	2.99	2.25	5.02	5.74	5.4	6.37	4.62	clathrin coat assembly protein ap-	gi|388497840|gb|AFK36986.1|unknown [Lotus japonicus]
TR68871|c0_g4_i1	10.31	3.01	2.9	0.35	0	0	5.29	myb transcription factor	gi|388497636|gb|AFK36884.1|unknown [Medicago truncatula]
TR59739|c0_g1_i1	12.31	9.14	12.33	2.04	6.04	2.85	11.05	ureidoglycolate hydrolase	gi|388497408|gb|AFK36770.1|unknown [Lotus japonicus]
TR69007|c0_g1_i6	5.07	5.29	5.59	6.28	8.99	7.03	4.68	pre-mrna-splicing factor atp-dependent rna helicase dhx16	gi|388496206|gb|AFK36169.1|unknown [Lotus japonicus]
TR58609|c0_g1_i1	1.64	1.34	2.48	8.14	14.28	12.41	1.61	ubiquitin-conjugating enzyme	gi|388496158|gb|AFK36145.1|unknown [Lotus japonicus]
Mj_1_GCCAAT_L005_R1_001_(paired)_trimmed_(paired)_contig_12127	6.38	4.6	7	6.86	9.96	8.26	11.15	ubiquitin-like protein smt3	gi|388495914|gb|AFK36023.1|unknown [Lotus japonicus]
TR47442|c0_g1_i1	18.52	11.51	7.27	44.34	80.9	83.73	22.61	histone 2	gi|388495876|gb|AFK36004.1|unknown [Lotus japonicus]
TR72710|c1_g4_i1	17.74	19.49	37.85	39.77	39.29	35.83	27.29	gtp-binding rab2a like protein	gi|388495178|gb|AFK35655.1|unknown [Lotus japonicus]
TR69703|c0_g1_i1	5.36	2.9	7.78	10.48	13.34	9.71	8.28	n-carbamoylputrescine amidase	gi|388494892|gb|AFK35512.1|unknown [Medicago truncatula]
TR69703|c0_g1_i2	6.02	3.45	9.32	9.28	16.45	13.55	9.66	n-carbamoylputrescine amidase	gi|388494892|gb|AFK35512.1|unknown [Medicago truncatula]
TR48942|c0_g1_i2	2.83	3.2	10.89	2.44	4.96	1.42	7.58	v0 subunit e	gi|388494592|gb|AFK35362.1|unknown [Lotus japonicus]
Mj_1_GCCAAT_L005_R1_001_(paired)_trimmed_(paired)_contig_17411	17.28	11.55	25.99	14.03	25.67	25.67	18.71	u6 snrna-associated sm-like protein lsm3	gi|388493932|gb|AFK35032.1|unknown [Lotus japonicus] gi|388511495|gb|AFK43809.1| unknown [Lotus japonicus]
TR58710|c0_g1_i3	1.69	2.81	4.37	4.16	4.56	2.54	6.5	tvp38 tmem64 family membrane protein slr0305-like	gi|388493816|gb|AFK34974.1|unknown [Medicago truncatula]
C915879	4.49	2.15	7.35	1.97	4.45	3.31	2.21	ww domain-containing oxidoreductase-like isoform 1	gi|388493540|gb|AFK34836.1|unknown [Lotus japonicus]
TR76981|c2_g3_i5	6.51	6.61	3	3.14	4.23	2.51	4.46	alpha beta fold family protein	gi|388492690|gb|AFK34411.1|unknown [Lotus japonicus]
TR61676|c0_g1_i4	10.31	10.28	15.7	1.51	2.41	1.9	7.1	zinc finger protein lsd1	gi|388492562|gb|AFK34347.1|unknown [Lotus japonicus]
TR55770|c0_g1_i1	14.05	10.83	25.7	2.78	6.72	3.6	22.2	adp-ribosylation factor-like protein	gi|388491766|gb|AFK33949.1|unknown [Lotus japonicus]
TR71357|c0_g1_i1	22.89	23.2	67.52	60.55	41.09	74.02	41.94	protein	gi|388491146|gb|AFK33639.1|unknown [Medicago truncatula]
scaffold10309	15.67	14.83	45.12	37.62	27.3	44.25	25.22	clathrin light chain 1-like	gi|388491146|gb|AFK33639.1|unknown [Medicago truncatula]
Mj_1_GCCAAT_L005_R1_001_(paired)_trimmed_(paired)_contig_12839	12.33	11.74	10.34	9.68	10.65	8.57	13.18	cullin 1	gi|386688468|gb|AFJ21664.1|cullin 1-like protein A [Prunus avium]
TR64233|c4_g1_i1	0.45	0.07	0.35	6.09	12.85	0.08	5.93	transcription factor rax3-like	gi|385845759|gb|AFI81248.1|R2R3-MYB transcription factor MYB1.1 [Quercus suber]
C972538	48.9	48.71	4.95	12.5	17.45	20.33	15.11	transcription factor ice1	gi|385251598|gb|AFI49627.1|inducer of CBF expression 1 [Vitis vinifera]
TR66380|c0_g1_i1	42	30.36	51.77	46.41	46.65	40.89	33.9	aspartyl aminopeptidase	gi|385178691|sp|B9RAJ0.2|DNPEP_RICCORecName: Full=Probable aspartyl aminopeptidase
TR53259|c0_g1_i2	4.4	2.09	0.32	1.28	0.24	8.44	0.53	myc-like anthocyanin regulatory protein	gi|38490129|gb|AAR21674.1|myc-like anthocyanin regulatory protein [Cornus alternifolia]
TR41155|c0_g1_i1	4.82	6.32	15.82	11.62	14.32	8.39	11.22	dehydration-responsive element binding protein 2	gi|384563931|gb|AFI08637.1|AP2/ERF type transcription factor [Ricinus communis]
TR51712|c0_g2_i1	72.46	73.97	257.24	93.11	94.96	47.83	100.59	glyceraldehyde-3-phosphate dehydrogenase	gi|384392523|gb|AFH88395.1|glyceraldehyde-3-phosphate dehydrogenase, partial [Eriobotrya japonica]
TR73765|c0_g4_i6	0	0	0.32	6.85	10.48	0	0	hypothetical protein RSPPHO_03274, partial	gi|384260397|ref|YP_005415583.1|hypothetical protein RSPPHO_03274, partial [Rhodospirillum photometricum DSM 122] gi|378401497|emb|CCG06613.1| Putative uncharacterized protein, partial [Rhodospirillum photometricum DSM 122]
TR75718|c0_g4_i4	0	0	0.62	6.24	8.21	2.32	0	conserved protein	gi|384260388|ref|YP_005415574.1|hypothetical protein RSPPHO_03265, partial [Rhodospirillum photometricum DSM 122] gi|378401488|emb|CCG06604.1| Putative uncharacterized protein, partial [Rhodospirillum photometricum DSM 122]
TR75718|c0_g5_i1	0.25	0.24	0	6.02	7.94	0.84	0.5	conserved protein	gi|384260388|ref|YP_005415574.1|hypothetical protein RSPPHO_03265, partial [Rhodospirillum photometricum DSM 122] gi|378401488|emb|CCG06604.1| Putative uncharacterized protein, partial [Rhodospirillum photometricum DSM 122]
TR75718|c0_g5_i2	0	0.24	0	5.22	10.96	0	0.5	conserved protein	gi|384260388|ref|YP_005415574.1|hypothetical protein RSPPHO_03265, partial [Rhodospirillum photometricum DSM 122] gi|378401488|emb|CCG06604.1| Putative uncharacterized protein, partial [Rhodospirillum photometricum DSM 122]
TR75088|c2_g3_i3	0	0	0	8.87	5.41	0.18	0	conserved protein	gi|384260387|ref|YP_005415573.1|hypothetical protein RSPPHO_03264, partial [Rhodospirillum photometricum DSM 122] gi|378401487|emb|CCG06603.1| unnamed protein product, partial [Rhodospirillum photometricum DSM 122]
TR73765|c0_g2_i1	0	0	0.29	2.69	6.14	0.8	0	conserved domain protein	gi|384260386|ref|YP_005415572.1|hypothetical protein RSPPHO_03263, partial [Rhodospirillum photometricum DSM 122] gi|378401486|emb|CCG06602.1| Putative uncharacterized protein, partial [Rhodospirillum photometricum DSM 122]
Mj_1_GCCAAT_L005_R1_001_(paired)_trimmed_(paired)_contig_92500	0	0	0	2.34	7.72	1.64	0	protein	gi|384254311|gb|EIE27785.1|CSD-domain-containing protein [Coccomyxa subellipsoidea C-169]
TR63358|c0_g1_i4	0	0	0	2.35	5.95	0.82	0	cold-shock dna binding protein	gi|384254311|gb|EIE27785.1|CSD-domain-containing protein [Coccomyxa subellipsoidea C-169]
TR66251|c0_g2_i1	0	0	0	2.47	7.66	1.07	0	nucleic acid binding protein	gi|384254311|gb|EIE27785.1|CSD-domain-containing protein [Coccomyxa subellipsoidea C-169]
TR66251|c0_g2_i2	0	0	0	1.72	5.8	0.8	0	nucleic acid binding protein	gi|384254311|gb|EIE27785.1|CSD-domain-containing protein [Coccomyxa subellipsoidea C-169]
Mj_1_GCCAAT_L005_R1_001_(paired)_trimmed_(paired)_contig_90615	0	0	0	1.84	5.43	0.55	0	60s ribosomal protein l18a	gi|384254262|gb|EIE27736.1|60S ribosomal protein L18a-2 [Coccomyxa subellipsoidea C-169]
TR55238|c0_g1_i1	0	0	0	1.34	8.65	0.78	0	protein	gi|384254077|gb|EIE27551.1|V-type ATPase [Coccomyxa subellipsoidea C-169]
TR61144|c0_g2_i1	0	0	0	4.21	8.16	0.8	0	h+-or na+-translocating f- v-type and a-type atpase superfamily	gi|384254058|gb|EIE27532.1|ATP synthase gamma-subunit [Coccomyxa subellipsoidea C-169]
TR50688|c1_g3_i1	0	0	0	1.45	7.84	1.01	0	protein	gi|384253576|gb|EIE27050.1|ribosomal protein S2 component of cytosolic 80S ribosome and 40S small subunit [Coccomyxa subellipsoidea C-169]
TR53676|c0_g1_i2	0	0	0	1.84	7.09	1.28	0	protein	gi|384253530|gb|EIE27005.1|hypothetical protein COCSUDRAFT_27353 [Coccomyxa subellipsoidea C-169]
Mj_1_GCCAAT_L005_R1_001_(paired)_trimmed_(paired)_contig_65407	0.84	0.3	1.86	5.03	8.38	2.35	1.67	alpha tubulin	gi|384253441|gb|EIE26916.1|tubulin alpha chain [Coccomyxa subellipsoidea C-169]
TR59714|c1_g2_i1	0	0	0	4.49	6.9	1.51	0	alpha tubulin 1	gi|384253441|gb|EIE26916.1|tubulin alpha chain [Coccomyxa subellipsoidea C-169]
TR64616|c1_g1_i3	0	0	0	6.1	7.53	1.76	0	alpha tubulin	gi|384253441|gb|EIE26916.1|tubulin alpha chain [Coccomyxa subellipsoidea C-169]
C949272	0	0	0	10.66	9.08	0.14	0	chlorophyll a b-binding protein	gi|384253398|gb|EIE26873.1|chlorophyll a/b-binding protein [Coccomyxa subellipsoidea C-169]
TR72280|c0_g1_i2	0	0	0	24.71	20.44	0.26	0	chlorophyll a b-binding protein	gi|384253398|gb|EIE26873.1|chlorophyll a/b-binding protein [Coccomyxa subellipsoidea C-169]
TR72475|c0_g8_i1	0	0	0	5.3	4.99	0.23	0	major light-harvesting chlorophyll a b protein	gi|384253398|gb|EIE26873.1|chlorophyll a/b-binding protein [Coccomyxa subellipsoidea C-169]
Mj_1_GCCAAT_L005_R1_001_(paired)_trimmed_(paired)_contig_91705	0	0	0	7.16	11.1	0.59	0	photosystem i subunit chloroplast precursor	gi|384253247|gb|EIE26722.1|hypothetical protein COCSUDRAFT_27193 [Coccomyxa subellipsoidea C-169]
TR61592|c0_g1_i2	0	0	0	9.79	22.74	2.32	0	photosystem i subunit iii	gi|384253247|gb|EIE26722.1|hypothetical protein COCSUDRAFT_27193 [Coccomyxa subellipsoidea C-169]
TR50763|c1_g3_i1	0	0	0	3.37	17.62	2.62	0	60s ribosomal protein l23	gi|384253137|gb|EIE26612.1|ribosomal protein L14b/L23e [Coccomyxa subellipsoidea C-169]
TR76330|c0_g1_i1	0	0	0	4.39	14.48	1.61	0	rubisco activase	gi|384253108|gb|EIE26583.1|Rubisco activase [Coccomyxa subellipsoidea C-169]
TR76330|c0_g1_i2	0	0	0	4.01	6.27	1.16	0	ribulose bisphosphate carboxylase oxygenase activase	gi|384253108|gb|EIE26583.1|Rubisco activase [Coccomyxa subellipsoidea C-169]
TR57436|c0_g1_i1	0	0	0	9.05	16.55	2.05	0	protein	gi|384253059|gb|EIE26534.1|chlorophyll a/b-binding protein P25 [Coccomyxa subellipsoidea C-169]
TR42344|c1_g1_i1	0	0	0	2.16	10.53	0.69	0	thioredoxin	gi|384252983|gb|EIE26458.1|thioredoxin Ch2 [Coccomyxa subellipsoidea C-169]
TR54985|c0_g1_i1	0	0	0	4.03	9.6	0.89	0	protein	gi|384252733|gb|EIE26209.1|plastid acyl carrier protein [Coccomyxa subellipsoidea C-169]
scaffold11809	0	0	0	1.4	6.33	0.2	0	acyl carrier protein	gi|384252733|gb|EIE26209.1|plastid acyl carrier protein [Coccomyxa subellipsoidea C-169]
TR66229|c1_g3_i1	0	0	0	8.35	17.72	1.1	0	photosystem i reaction center subunit xi	gi|384252680|gb|EIE26156.1|PsaL-domain-containing protein [Coccomyxa subellipsoidea C-169]
TR36431|c1_g2_i1	0	0	0	0.82	5.04	0.58	0	protein	gi|384252566|gb|EIE26042.1|hypothetical protein COCSUDRAFT_64948 [Coccomyxa subellipsoidea C-169]
TR27255|c0_g1_i1	0	0	0	1.78	6.46	0.89	0	peroxiredoxin 5	gi|384252463|gb|EIE25939.1|thioredoxin-like protein [Coccomyxa subellipsoidea C-169]
C929902	0	0	0	4.37	10	1.31	0	elongation factor 1- partial	gi|384252431|gb|EIE25907.1|translation elongation factor [Coccomyxa subellipsoidea C-169]
TR58089|c1_g1_i1	0	0	0	4.82	13.29	1.69	0.21	elongation factor 1-alpha	gi|384252431|gb|EIE25907.1|translation elongation factor [Coccomyxa subellipsoidea C-169]
TR54038|c0_g2_i2	0	0	0	3.73	12.23	0.79	0	oxygen-evolving enhancer protein chloroplast precursor	gi|384252375|gb|EIE25851.1|photosystem II oxygen evolving complex protein PsbQ [Coccomyxa subellipsoidea C-169]
TR38300|c0_g1_i1	0	0	0	1.7	5.2	0.59	0	protein	gi|384252369|gb|EIE25845.1|hypothetical protein COCSUDRAFT_52595 [Coccomyxa subellipsoidea C-169]
Mj_1_GCCAAT_L005_R1_001_(paired)_trimmed_(paired)_contig_89195	0	0	0	2.76	8.05	0.64	0	60s acidic ribosomal protein p0	gi|384252058|gb|EIE25535.1|hypothetical protein COCSUDRAFT_52908 [Coccomyxa subellipsoidea C-169]
Mj_1_GCCAAT_L005_R1_001_(paired)_trimmed_(paired)_contig_91661	0	0	0	0.48	7.43	0	0	60s ribosomal protein l29-1	gi|384252037|gb|EIE25514.1|hypothetical protein COCSUDRAFT_52899 [Coccomyxa subellipsoidea C-169]
TR42305|c0_g2_i1	0	0	0	2.51	5.06	0.63	0	60s ribosomal protein l10a-1	gi|384251854|gb|EIE25331.1|60S ribosomal protein L10a [Coccomyxa subellipsoidea C-169]
Mj_1_GCCAAT_L005_R1_001_(paired)_trimmed_(paired)_contig_91064	0	0	0	3.58	5.33	0.83	0	protein	gi|384251528|gb|EIE25005.1|photosystem II oxygen evolving complex protein PsbP [Coccomyxa subellipsoidea C-169]
TR63030|c1_g1_i1	0	0	0	3.75	7.06	1.05	0	photosystem ii oxygen-evolving complex 23 kda chloroplast precursor	gi|384251528|gb|EIE25005.1|photosystem II oxygen evolving complex protein PsbP [Coccomyxa subellipsoidea C-169]
TR63030|c2_g1_i1	0	0	0	2.13	6.71	0.25	0	photosystem ii oxygen-evolving complex 23 kda chloroplast precursor	gi|384251528|gb|EIE25005.1|photosystem II oxygen evolving complex protein PsbP [Coccomyxa subellipsoidea C-169]
TR63030|c2_g1_i2	0	0	0	3.86	8.41	0.52	0	photosystem ii oxygen-evolving complex 23 kda chloroplast precursor	gi|384251528|gb|EIE25005.1|photosystem II oxygen evolving complex protein PsbP [Coccomyxa subellipsoidea C-169]
TR45047|c0_g1_i3	0	0	0	0.98	5.76	0.34	0	60s ribosomal protein l35	gi|384251370|gb|EIE24848.1|hypothetical protein COCSUDRAFT_28397 [Coccomyxa subellipsoidea C-169]
TR49397|c1_g1_i3	0	0	0	2.32	5	0.23	0	protein	gi|384251307|gb|EIE24785.1|hypothetical protein COCSUDRAFT_14019, partial [Coccomyxa subellipsoidea C-169]
Mj_1_GCCAAT_L005_R1_001_(paired)_trimmed_(paired)_contig_90456	0	0	0	2.76	12.22	1.34	0	psi-h precursor	gi|384251275|gb|EIE24753.1|photosystem I reaction centre subunit VI [Coccomyxa subellipsoidea C-169]
TR59366|c0_g1_i3	0	0	0	2.54	7.01	0.59	0	psi-h precursor	gi|384251275|gb|EIE24753.1|photosystem I reaction centre subunit VI [Coccomyxa subellipsoidea C-169]
TR60938|c1_g1_i2	0	0	0	1.97	9.76	0.86	0	60s acidic ribosomal protein p1	gi|384251184|gb|EIE24662.1|ribosomal protein 60S [Coccomyxa subellipsoidea C-169]
TR60938|c1_g1_i4	0	0	0	1.1	9.91	0.92	0	60s acidic ribosomal protein p1	gi|384251184|gb|EIE24662.1|ribosomal protein 60S [Coccomyxa subellipsoidea C-169]
Mj_1_GCCAAT_L005_R1_001_(paired)_trimmed_(paired)_contig_91489	0	0	0	2.07	6	0.83	0	protein	gi|384251103|gb|EIE24581.1|L30e-like protein [Coccomyxa subellipsoidea C-169]
Mj_1_GCCAAT_L005_R1_001_(paired)_trimmed_(paired)_contig_90934	0	0	0	8.13	9.69	1.51	0	thiazole biosynthetic enzyme	gi|384250907|gb|EIE24385.1|thiazole biosynthetic enzyme [Coccomyxa subellipsoidea C-169]
TR70273|c0_g1_i1	0	0	0	9.63	19.71	1.64	0	thiazole biosynthetic enzyme	gi|384250907|gb|EIE24385.1|thiazole biosynthetic enzyme [Coccomyxa subellipsoidea C-169]
TR48396|c1_g1_i1	0	0	0	3.17	5.45	0.26	0	glycolate dehydrogenase	gi|384250702|gb|EIE24181.1|glycolate dehydrogenase [Coccomyxa subellipsoidea C-169]
TR63377|c0_g1_i4	0	0	0	6.34	16.34	1.3	0	pinus taeda anonymous locus 2_114_01 genomic sequence	gi|384250630|gb|EIE24109.1|chlorophyll a/b-binding protein [Coccomyxa subellipsoidea C-169]
Mj_1_GCCAAT_L005_R1_001_(paired)_trimmed_(paired)_contig_48117	0	0	0	3.49	5.34	1.22	0	beta tubulin	gi|384250595|gb|EIE24074.1|beta tubulin [Coccomyxa subellipsoidea C-169]
TR43729|c0_g1_i1	0	0	0	3.55	6.31	0.55	0	40s ribosomal protein s9	gi|384250459|gb|EIE23938.1|ribosomal protein S9 component of cytosolic 80S ribosome and 40S small subunit [Coccomyxa subellipsoidea C-169]
Mj_1_GCCAAT_L005_R1_001_(paired)_trimmed_(paired)_contig_92786	0	0	0	2.49	7.04	0.44	0	chloroplast atp synthase subunit ii	gi|384250314|gb|EIE23794.1|chloroplast ATP synthase subunit II [Coccomyxa subellipsoidea C-169]
TR54107|c1_g1_i1	0	0	0	2.58	6.69	0.6	0	calmodulin mutant syncam9	gi|384250284|gb|EIE23764.1|EF-hand [Coccomyxa subellipsoidea C-169]
TR7617|c0_g1_i1	0	0	0	2.19	6.52	0.76	0	protein	gi|384249978|gb|EIE23458.1|hypothetical protein COCSUDRAFT_33078 [Coccomyxa subellipsoidea C-169]
TR57289|c0_g1_i3	0	0	0	4.04	5.63	0.49	0	hypothetical protein COCSUDRAFT_65911	gi|384249947|gb|EIE23427.1|hypothetical protein COCSUDRAFT_65911 [Coccomyxa subellipsoidea C-169]
TR72525|c1_g1_i1	0	0	0	14.01	29.6	3.83	0	stress-related chlorophyll a b binding protein 2	gi|384249936|gb|EIE23416.1|hypothetical protein COCSUDRAFT_65904 [Coccomyxa subellipsoidea C-169]
Mj_1_GCCAAT_L005_R1_001_(paired)_trimmed_(paired)_contig_92643	0	0	0	1.29	5.79	0.68	0	protein	gi|384249744|gb|EIE23225.1|hypothetical protein COCSUDRAFT_63581 [Coccomyxa subellipsoidea C-169]
TR50351|c0_g1_i1	0	0	0	2.9	7.34	0.53	0	60s ribosomal protein l11	gi|384249657|gb|EIE23138.1|ribosomal protein L5 [Coccomyxa subellipsoidea C-169]
TR46881|c0_g1_i1	0	0	0	1.34	6.29	0	0	udp-galactopyranose mutase	gi|384249606|gb|EIE23087.1|FAD/NAD(P)-binding domain-containing protein [Coccomyxa subellipsoidea C-169]
TR58118|c1_g2_i1	0	0	0	2.1	7.12	1.08	0	60s ribosomal protein l10-3	gi|384249500|gb|EIE22981.1|ribosomal protein L10e [Coccomyxa subellipsoidea C-169]
Mj_1_GCCAAT_L005_R1_001_(paired)_trimmed_(paired)_contig_89816	0	0	0	3.08	5.23	0.43	0	glutamate dehydrogenase	gi|384249427|gb|EIE22909.1|putative glutamate dehydrogenase [Coccomyxa subellipsoidea C-169]
TR55165|c0_g1_i1	0	0	0	4.28	5.58	0.69	0	glutamate dehydrogenase	gi|384249427|gb|EIE22909.1|putative glutamate dehydrogenase [Coccomyxa subellipsoidea C-169]
TR53496|c1_g1_i1	0	0	0	2.19	7.14	0.42	0	ribosomal protein l39	gi|384249336|gb|EIE22818.1|60S ribosomal protein L39 [Coccomyxa subellipsoidea C-169]
TR56806|c0_g1_i1	0	0	0	4.68	8.55	1.15	0	photosystem i subunit o	gi|384249293|gb|EIE22775.1|photosystem I PsaO [Coccomyxa subellipsoidea C-169]
TR56806|c0_g1_i3	0	0	0	8.62	14.21	1.88	0	photosystem i subunit o	gi|384249293|gb|EIE22775.1|photosystem I PsaO [Coccomyxa subellipsoidea C-169]
TR47851|c0_g1_i1	0	0	0	1.81	9.59	0.95	0	protein	gi|384249241|gb|EIE22723.1|L30e-like protein [Coccomyxa subellipsoidea C-169]
TR72673|c0_g1_i1	0	0	0	9.22	17.83	1.7	0	photosystem i reaction center subunit chloroplast	gi|384249013|gb|EIE22496.1|PSI-D1 precursor [Coccomyxa subellipsoidea C-169]
TR38751|c0_g1_i1	0	0	0	1.18	5.54	0.41	0	protein	gi|384248699|gb|EIE22182.1|elongation factor 2 [Coccomyxa subellipsoidea C-169]
TR46166|c1_g1_i1	0	0	0	1.34	5.55	0.19	0	protein	gi|384248529|gb|EIE22013.1|ribosomal protein L17 component of cytosolic 80S ribosome and 60S large subunit [Coccomyxa subellipsoidea C-169]
TR70911|c0_g1_i2	0	0	0	4.83	13.93	0.8	0	hypothetical protein COCSUDRAFT_48009	gi|384248495|gb|EIE21979.1|hypothetical protein COCSUDRAFT_48009 [Coccomyxa subellipsoidea C-169]
TR39555|c0_g3_i1	0	0	0	0	6.37	0	0	ribosomal protein l13e	gi|384248456|gb|EIE21940.1|ribosomal protein L13e [Coccomyxa subellipsoidea C-169]
C968352	0	0	0	6.66	3.93	0.49	0	light-harvesting protein of photosystem i	gi|384248319|gb|EIE21803.1|chlorophyll a/b-binding protein [Coccomyxa subellipsoidea C-169]
Mj_1_GCCAAT_L005_R1_001_(paired)_trimmed_(paired)_contig_91812	0	0	0	6.35	1.77	0.3	0	light-harvesting protein of photosystem i	gi|384248319|gb|EIE21803.1|chlorophyll a/b-binding protein [Coccomyxa subellipsoidea C-169]
TR57870|c0_g2_i1	0	0	0	9.81	8.87	1.04	0.08	light-harvesting protein of photosystem i	gi|384248319|gb|EIE21803.1|chlorophyll a/b-binding protein [Coccomyxa subellipsoidea C-169]
TR40028|c0_g1_i1	0	0	0	5.69	10.25	1.06	0	light-harvesting complex	gi|384248209|gb|EIE21694.1|hypothetical protein COCSUDRAFT_67011 [Coccomyxa subellipsoidea C-169]
TR67600|c2_g1_i1	0	0	0	5.17	11.71	1.78	0	chlorophyll a-b binding protein	gi|384248209|gb|EIE21694.1|hypothetical protein COCSUDRAFT_67011 [Coccomyxa subellipsoidea C-169]
Mj_1_GCCAAT_L005_R1_001_(paired)_trimmed_(paired)_contig_92293	0	0	0	1.55	5.1	0.9	0	protein	gi|384248089|gb|EIE21574.1|ribosomal protein L15e [Coccomyxa subellipsoidea C-169]
TR49154|c1_g1_i1	0	0	0	2.8	5.5	0.33	0	hypothetical protein COCSUDRAFT_56707	gi|384248009|gb|EIE21494.1|hypothetical protein COCSUDRAFT_56707 [Coccomyxa subellipsoidea C-169]
C928136	0	0	0	2.26	5.47	0.23	0	40s ribosomal protein s20-2	gi|384247700|gb|EIE21186.1|ribosomal protein S1 [Coccomyxa subellipsoidea C-169] gi|384251195|gb|EIE24673.1| ribosomal protein S1 [Coccomyxa subellipsoidea C-169]
TR45213|c0_g1_i1	0	0	0	1.13	6.62	0.79	0	40s ribosomal protein s20-2	gi|384247700|gb|EIE21186.1|ribosomal protein S1 [Coccomyxa subellipsoidea C-169] gi|384251195|gb|EIE24673.1| ribosomal protein S1 [Coccomyxa subellipsoidea C-169]
Mj_1_GCCAAT_L005_R1_001_(paired)_trimmed_(paired)_contig_91276	0	0	0	0.96	5.41	0.67	0	translation factor	gi|384247458|gb|EIE20945.1|translation initiation factor SU [Coccomyxa subellipsoidea C-169]
TR33650|c0_g1_i1	0	0	0	2.04	8.26	0.71	0	eukaryotic initiation factor	gi|384247340|gb|EIE20827.1|eukaryotic initiation factor [Coccomyxa subellipsoidea C-169]
TR53079|c0_g2_i1	0	0	0	2.95	7.55	0.59	0	60s ribosomal protein	gi|384247333|gb|EIE20820.1|hypothetical protein COCSUDRAFT_30453 [Coccomyxa subellipsoidea C-169]
C954604	0	0	0	1.59	5.81	0.62	0	40s ribosomal protein s28	gi|384247236|gb|EIE20723.1|ribosomal protein S28e [Coccomyxa subellipsoidea C-169]
TR51662|c0_g1_i1	0	0	0	6.26	10.8	1.21	0	chlorophyll a-b binding protein 6a	gi|384247026|gb|EIE20514.1|light harvesting complex protein I-20 [Coccomyxa subellipsoidea C-169]
TR55868|c0_g1_i1	0	0	0	4.26	13.69	0.74	0	light-harvesting protein of photosystem i	gi|384247026|gb|EIE20514.1|light harvesting complex protein I-20 [Coccomyxa subellipsoidea C-169]
C956082	0	0	0	9.25	16.65	1.41	0	light-harvesting protein of photosystem i	gi|384247025|gb|EIE20513.1|light-harvesting complex I protein [Coccomyxa subellipsoidea C-169]
Mj_1_GCCAAT_L005_R1_001_(paired)_trimmed_(paired)_contig_89459	0	0	0	6.53	5.73	0.79	0	chloroplast precursor	gi|384246945|gb|EIE20433.1|chloroplast ferredoxin [Coccomyxa subellipsoidea C-169]
Mj_1_GCCAAT_L005_R1_001_(paired)_trimmed_(paired)_contig_89801	0	0	0	12.64	24.1	3.54	0	ferredoxin	gi|384246945|gb|EIE20433.1|chloroplast ferredoxin [Coccomyxa subellipsoidea C-169]
TR74255|c1_g1_i1	0	0	0	3.6	5.94	0.9	0	light-harvesting complex i chlorophyll a b binding protein 3	gi|384246844|gb|EIE20333.1|light-harvesting chlorophyll a/b-binding protein Lhca2 [Coccomyxa subellipsoidea C-169]
TR74255|c2_g1_i5	0	0	0	3.76	5.82	0.94	0	light-harvesting complex i chlorophyll a b binding protein 3	gi|384246844|gb|EIE20333.1|light-harvesting chlorophyll a/b-binding protein Lhca2 [Coccomyxa subellipsoidea C-169]
Mj_1_GCCAAT_L005_R1_001_(paired)_trimmed_(paired)_contig_90373	0	0	0	3.49	5.74	1.12	0	protein	gi|384246787|gb|EIE20276.1|eukaryotic initiation factor 4A-like protein [Coccomyxa subellipsoidea C-169]
TR47254|c0_g3_i1	0	0	0	0.99	6.24	1.16	0	brown planthopper-induced resistance protein 1	gi|384246764|gb|EIE20253.1|CBS-domain-containing protein [Coccomyxa subellipsoidea C-169]
TR69512|c0_g2_i2	0	0	0	8.37	10.14	0.93	0	33kda oxygen evolving protein of photosystem ii	gi|384246540|gb|EIE20030.1|33kDa oxygen evolving protein of photosystem II [Coccomyxa subellipsoidea C-169]
TR74710|c0_g1_i1	0	0	0	4.84	7.37	0.52	0	33kda oxygen evolving protein of photosystem ii	gi|384246540|gb|EIE20030.1|33kDa oxygen evolving protein of photosystem II [Coccomyxa subellipsoidea C-169]
TR74710|c0_g1_i3	0	0	0	7.86	10.73	1.48	0	33kda oxygen evolving protein of photosystem ii	gi|384246540|gb|EIE20030.1|33kDa oxygen evolving protein of photosystem II [Coccomyxa subellipsoidea C-169]
TR71749|c2_g2_i1	0	0	0	34.54	39.72	4.56	0	chlorophyll a b-binding protein	gi|384246503|gb|EIE19993.1|chlorophyll a/b-binding protein [Coccomyxa subellipsoidea C-169]
TR71749|c2_g2_i3	0	0	0	40.34	76.35	8.84	0	chlorophyll a b-binding protein	gi|384246503|gb|EIE19993.1|chlorophyll a/b-binding protein [Coccomyxa subellipsoidea C-169]
TR72280|c0_g1_i5	0	0	0	35.08	75.62	8.26	0	chlorophyll a b-binding protein	gi|384246503|gb|EIE19993.1|chlorophyll a/b-binding protein [Coccomyxa subellipsoidea C-169]
TR72475|c0_g6_i3	0	0	0	13.15	9.87	0.47	0	major light-harvesting chlorophyll a b protein	gi|384246503|gb|EIE19993.1|chlorophyll a/b-binding protein [Coccomyxa subellipsoidea C-169]
TR72475|c0_g6_i4	0	0	0	47	76.04	8.6	0	chlorophyll a b-binding protein	gi|384246503|gb|EIE19993.1|chlorophyll a/b-binding protein [Coccomyxa subellipsoidea C-169]
TR72475|c1_g2_i2	0	0	0	16.04	22.66	3.18	0	chlorophyll a b-binding protein	gi|384246503|gb|EIE19993.1|chlorophyll a/b-binding protein [Coccomyxa subellipsoidea C-169]
TR72475|c1_g2_i4	0	0	0	15.4	12	1.06	0	chlorophyll a b-binding protein	gi|384246503|gb|EIE19993.1|chlorophyll a/b-binding protein [Coccomyxa subellipsoidea C-169]
TR56770|c0_g1_i2	0	0	0	1.58	7.12	0.66	0	protein	gi|384246110|gb|EIE19601.1|ferredoxin-NADP+ reductase [Coccomyxa subellipsoidea C-169]
TR56770|c1_g1_i1	0	0	0	2.2	7.4	0.48	0	ferredoxin--nadp+ reductase	gi|384246110|gb|EIE19601.1|ferredoxin-NADP+ reductase [Coccomyxa subellipsoidea C-169]
TR49091|c0_g1_i2	0	0	0	1.21	5.01	0.85	0	protein	gi|384246071|gb|EIE19562.1|ribosomal protein L30 [Coccomyxa subellipsoidea C-169]
TR10824|c0_g1_i2	0	0	0	3.38	6.03	0.75	0	40s ribosomal protein s15	gi|384245975|gb|EIE19467.1|ribosomal protein S19 [Coccomyxa subellipsoidea C-169]
Mj_1_GCCAAT_L005_R1_001_(paired)_trimmed_(paired)_contig_90958	0	0	0	1.6	5.27	0.56	0	protein	gi|384245868|gb|EIE19360.1|PspA/IM30 [Coccomyxa subellipsoidea C-169]
TR63245|c0_g1_i1	0	0	0	0.6	8.48	0.42	0	serine hydroxymethyltransferase	gi|384245679|gb|EIE19172.1|SHMT-domain-containing protein [Coccomyxa subellipsoidea C-169]
TR63245|c1_g1_i3	0	0	0	3.97	8.76	0.77	0	serine hydroxymethyltransferase	gi|384245679|gb|EIE19172.1|SHMT-domain-containing protein [Coccomyxa subellipsoidea C-169]
TR55684|c1_g1_i1	0	0	0	4.97	11.54	0.67	0	adp-ribosylation factor	gi|384245653|gb|EIE19146.1|ADP-ribosylation factor 1 [Coccomyxa subellipsoidea C-169]
TR63065|c0_g1_i6	0	0	0	3.13	9.52	1.18	0	cyclophilin-like protein	gi|384245442|gb|EIE18936.1|cyclophilin-like protein [Coccomyxa subellipsoidea C-169]
Mj_1_GCCAAT_L005_R1_001_(paired)_trimmed_(paired)_contig_95267	0	0	0	1	5.18	0.35	0	40s ribosomal protein s11	gi|384245271|gb|EIE18766.1|ribosomal protein S11 component of cytosolic 80S ribosome and 40S small subunit [Coccomyxa subellipsoidea C-169]
TR63355|c2_g1_i1	0	0	0	1.65	5.65	0.43	0	lhc-related protein	gi|384245226|gb|EIE18721.1|hypothetical protein COCSUDRAFT_60029 [Coccomyxa subellipsoidea C-169]
TR58893|c1_g2_i2	0	0	0	3.02	8.42	0.58	0	transketolase	gi|384245218|gb|EIE18713.1|transketolase 7 [Coccomyxa subellipsoidea C-169]
TR62873|c1_g1_i1	0	0	0	1.95	6.13	1.25	0	aldehyde dehydrogenase	gi|384244944|gb|EIE18440.1|aldehyde dehydrogenase [Coccomyxa subellipsoidea C-169]
TR69135|c0_g1_i4	0	0	0	11.08	26.78	3	0	chloroplast precursor	gi|384244823|gb|EIE18320.1|Plastocyanin, chloroplastic [Coccomyxa subellipsoidea C-169]
scaffold13396	0	0	0	7.56	9.31	0.41	0	chloroplast precursor	gi|384244823|gb|EIE18320.1|Plastocyanin, chloroplastic [Coccomyxa subellipsoidea C-169]
TR47875|c0_g1_i2	0	0	0	2.03	5.16	0.28	0	sedoheptulose- -bisphosphatase	gi|384244700|gb|EIE18198.1|sedoheptulose-1,7-bisphosphatase [Coccomyxa subellipsoidea C-169]
TR39527|c0_g1_i1	0	0	0	1.42	5.1	0	0	geranylgeranyl reductase	gi|384244672|gb|EIE18171.1|putative plastid geranylgeranyl reductase precursor [Coccomyxa subellipsoidea C-169]
TR37456|c0_g1_i1	37.64	14.72	117.52	0	1.11	0.27	113.02	gibberellin induced protein	gi|383932364|gb|AFH57279.1|GASA-like protein [Gossypium hirsutum]
TR74358|c1_g2_i6	4.18	10.49	39.26	3.53	4.15	0.89	36.75	peroxidase 2	gi|383081963|dbj|BAM05634.1|peroxidase 2 [Eucalyptus pilularis] gi|383081967|dbj|BAM05636.1| peroxidase 2 [Eucalyptus pyrocarpa]
TR74358|c1_g2_i7	8.39	10.41	140.04	20.42	21.33	1.09	82.59	peroxidase 2	gi|383081963|dbj|BAM05634.1|peroxidase 2 [Eucalyptus pilularis] gi|383081967|dbj|BAM05636.1| peroxidase 2 [Eucalyptus pyrocarpa]
TR76840|c0_g1_i4	5.55	19.96	64.75	6.84	4.58	0	71.27	peroxidase 2	gi|383081963|dbj|BAM05634.1|peroxidase 2 [Eucalyptus pilularis] gi|383081967|dbj|BAM05636.1| peroxidase 2 [Eucalyptus pyrocarpa]
TR66062|c0_g1_i2	9.12	12.98	6.34	0.87	3.13	2.44	4.01	glucose-6-phosphate dehydrogenase	gi|380862996|gb|AFF18791.1|glucose-6-phosphate 1-dehydrogenase, partial [Dimocarpus longan]
Mj_1_GCCAAT_L005_R1_001_(paired)_trimmed_(paired)_contig_102367	0	0	0	0.28	0	16.5	0	early light-inducible protein	gi|380504946|gb|AFD62760.1|ELIP, partial [Citrus sinensis]
TR43756|c0_g1_i1	0	0	0	2.32	7.64	0	0	alcohol oxidase	gi|380490449|emb|CCF36001.1|alcohol oxidase, partial [Colletotrichum higginsianum]
TR55986|c0_g1_i2	0	0	0	6.2	15.82	0.26	0	hypothetical protein CH063_00278	gi|380487054|emb|CCF38292.1|hypothetical protein CH063_00278 [Colletotrichum higginsianum]
TR59915|c3_g4_i6	0.14	0.14	0	7.52	2.36	0	0	hypothetical protein, partial	gi|380446936|gb|AFD53814.1|hypothetical protein, partial [Trichoderma harzianum]
TR68795|c1_g1_i1	18.09	16.67	3.68	0.93	1.61	1.52	1.74	superoxide dismutase	gi|380085077|gb|AFD34189.1|Fe superoxide dismutase [Jatropha curcas]
TR62642|c0_g2_i2	14.67	26.76	28.54	18.22	17.45	13.35	25.89	dehydrogenase reductase sdr family member 4	gi|380039554|gb|AFD32321.1|tropinone reductase-like 3 [Erythroxylum coca]
scaffold13234	0	0	0	0	0	0	7.16	clone 205-like	gi|380025506|ref|XP_003696514.1|PREDICTED: actin, indirect flight muscle-like isoform 2 [Apis florea]
Mj_1_GCCAAT_L005_R1_001_(paired)_trimmed_(paired)_contig_23485	8.54	7.65	5.94	1.23	2.13	4.17	4.85	protein	gi|380006413|gb|AFD29597.1|caprice [Gossypium arboreum] gi|380006419|gb|AFD29600.1| CPC-like protein [Gossypium hirsutum]
TR62307|c0_g2_i5	6.09	5.44	5.98	5.79	7.23	3.94	5.02	phosphoribosylaminoimidazole-succinocarboxamide synthase	gi|37983622|gb|AAR06292.1|SAICAR synthetase [Nicotiana tabacum]
TR62104|c1_g1_i3	0	0	0	4.51	7.63	0	0	cell wall-associated hydrolase	gi|379708635|ref|YP_005263840.1|hypothetical protein NOCYR_2433 [Nocardia cyriacigeorgica GUH-2] gi|374846134|emb|CCF63204.1| conserved protein of unknown function [Nocardia cyriacigeorgica GUH-2]
Mj_1_GCCAAT_L005_R1_001_(paired)_trimmed_(paired)_contig_95804	0	0	0	0.84	6.33	0	0	hypothetical protein HMPREF1120_08580	gi|378734168|gb|EHY60627.1|hypothetical protein HMPREF1120_08580 [Exophiala dermatitidis NIH/UT8656]
Mj_1_GCCAAT_L005_R1_001_(paired)_trimmed_(paired)_contig_92300	0	0	0	1.23	6.26	0.09	0	tpa_inf: gpr1 fun34 -class plasma membrane protein	gi|378733290|gb|EHY59749.1|hypothetical protein HMPREF1120_07732 [Exophiala dermatitidis NIH/UT8656]
TR84732|c0_g1_i1	0	0	0	3.84	5.62	0.3	0	cyanate hydratase	gi|378732878|gb|EHY59337.1|cyanate hydratase [Exophiala dermatitidis NIH/UT8656]
Mj_1_GCCAAT_L005_R1_001_(paired)_trimmed_(paired)_contig_90045	0	0	0	2.89	6.8	0	0	non-classical export protein	gi|378731855|gb|EHY58314.1|hypothetical protein HMPREF1120_06326 [Exophiala dermatitidis NIH/UT8656]
TR37844|c1_g1_i1	0	0	0	3.12	6.46	0	0	non-classical export protein	gi|378731855|gb|EHY58314.1|hypothetical protein HMPREF1120_06326 [Exophiala dermatitidis NIH/UT8656]
TR50334|c0_g1_i1	0	0	0	2.22	6.27	0.17	0	non-classical export protein	gi|378731855|gb|EHY58314.1|hypothetical protein HMPREF1120_06326 [Exophiala dermatitidis NIH/UT8656]
Mj_1_GCCAAT_L005_R1_001_(paired)_trimmed_(paired)_contig_90732	0	0	0	3.9	14.41	0.39	0	duf636 domain protein	gi|378731672|gb|EHY58131.1|hypothetical protein HMPREF1120_06149 [Exophiala dermatitidis NIH/UT8656]
Mj_1_GCCAAT_L005_R1_001_(paired)_trimmed_(paired)_contig_92330	0	0	0	4.02	6.42	0	0	duf636 domain protein	gi|378731672|gb|EHY58131.1|hypothetical protein HMPREF1120_06149 [Exophiala dermatitidis NIH/UT8656]
TR106577|c0_g1_i1	0	0	0	4.35	9.73	0	0.17	duf636 domain protein	gi|378731672|gb|EHY58131.1|hypothetical protein HMPREF1120_06149 [Exophiala dermatitidis NIH/UT8656]
TR25981|c0_g1_i1	0	0	0	3.08	12.08	1.97	0	duf636 domain protein	gi|378731672|gb|EHY58131.1|hypothetical protein HMPREF1120_06149 [Exophiala dermatitidis NIH/UT8656]
TR51257|c2_g2_i1	0	0	0	4.15	5.02	0.83	0	60s ribosomal protein l10	gi|378731470|gb|EHY57929.1|60S ribosomal protein L10-A [Exophiala dermatitidis NIH/UT8656]
TR44164|c0_g1_i1	0	0	0	6.76	23.09	0.5	0	hypothetical protein HMPREF1120_05862	gi|378731379|gb|EHY57838.1|hypothetical protein HMPREF1120_05862 [Exophiala dermatitidis NIH/UT8656]
scaffold12530	0	0	0	3.72	8.11	0	0	peptidyl-prolyl cis-trans isomerase	gi|378729867|gb|EHY56326.1|peptidylprolyl isomerase [Exophiala dermatitidis NIH/UT8656]
Mj_1_GCCAAT_L005_R1_001_(paired)_trimmed_(paired)_contig_94281	0	0	0	2.19	5.99	0.15	0	hypothetical protein HMPREF1120_04120	gi|378729555|gb|EHY56014.1|hypothetical protein HMPREF1120_04120 [Exophiala dermatitidis NIH/UT8656]
TR52925|c0_g1_i1	0	0	0	9.8	16.73	1.07	0	ddhd domain-containing protein	gi|378729467|gb|EHY55926.1|hypothetical protein HMPREF1120_04035 [Exophiala dermatitidis NIH/UT8656]
TR62178|c0_g3_i2	0	0	0	5.88	11.08	1.03	0	ddhd domain-containing protein	gi|378729467|gb|EHY55926.1|hypothetical protein HMPREF1120_04035 [Exophiala dermatitidis NIH/UT8656]
TR62178|c0_g4_i2	0	0	0	5.81	8.2	0.76	0	upf0591 membrane protein	gi|378729467|gb|EHY55926.1|hypothetical protein HMPREF1120_04035 [Exophiala dermatitidis NIH/UT8656]
TR62178|c1_g1_i1	0	0	0	2.74	9.44	0.85	0.38	upf0591 membrane protein	gi|378729467|gb|EHY55926.1|hypothetical protein HMPREF1120_04035 [Exophiala dermatitidis NIH/UT8656]
TR62178|c1_g1_i3	0	0	0	6.91	12.75	0.39	0	upf0591 membrane protein	gi|378729467|gb|EHY55926.1|hypothetical protein HMPREF1120_04035 [Exophiala dermatitidis NIH/UT8656]
Mj_1_GCCAAT_L005_R1_001_(paired)_trimmed_(paired)_contig_89591	0	0	0	14.72	11.59	0.28	0	alcohol oxidase	gi|378729152|gb|EHY55611.1|alcohol oxidase [Exophiala dermatitidis NIH/UT8656]
TR71876|c0_g1_i1	0	0	0	15.33	20.83	0.5	0	alcohol oxidase	gi|378729152|gb|EHY55611.1|alcohol oxidase [Exophiala dermatitidis NIH/UT8656]
TR74647|c1_g1_i3	0	0	0	5.42	7.71	0.23	0	alcohol oxidase	gi|378729152|gb|EHY55611.1|alcohol oxidase [Exophiala dermatitidis NIH/UT8656]
Mj_1_GCCAAT_L005_R1_001_(paired)_trimmed_(paired)_contig_94438	0	0	0	1.48	5.24	0	0	#NAME?	gi|378728469|gb|EHY54928.1|hypothetical protein HMPREF1120_03087 [Exophiala dermatitidis NIH/UT8656]
TR64582|c4_g3_i7	0	0	0	4.74	9.68	0.55	0.12	atp synthase subunit beta	gi|378728418|gb|EHY54877.1|ATP synthase subunit beta, mitochondrial [Exophiala dermatitidis NIH/UT8656]
TR55987|c5_g1_i2	0	0	0	4.44	5.63	0.36	0	allergen	gi|378728116|gb|EHY54575.1|hypothetical protein HMPREF1120_02743 [Exophiala dermatitidis NIH/UT8656]
TR57891|c1_g1_i1	0	0	0	4.25	8.85	0.12	0	allergen-like protein	gi|378728116|gb|EHY54575.1|hypothetical protein HMPREF1120_02743 [Exophiala dermatitidis NIH/UT8656]
TR58443|c1_g1_i1	0	0	0	4.97	6.02	0.2	0	allergen	gi|378728116|gb|EHY54575.1|hypothetical protein HMPREF1120_02743 [Exophiala dermatitidis NIH/UT8656]
TR58443|c1_g1_i2	0	0	0	5.33	7.16	0.34	0	allergen	gi|378728116|gb|EHY54575.1|hypothetical protein HMPREF1120_02743 [Exophiala dermatitidis NIH/UT8656]
Mj_1_GCCAAT_L005_R1_001_(paired)_trimmed_(paired)_contig_72851	0	0.13	0	8.6	11.26	0.59	0.52	elongation factor 1-alpha	gi|378728030|gb|EHY54489.1|elongation factor 1-alpha [Exophiala dermatitidis NIH/UT8656]
Mj_1_GCCAAT_L005_R1_001_(paired)_trimmed_(paired)_contig_91326	0	0	0	2.66	6.06	0	0	scp-like extracellular	gi|378727934|gb|EHY54393.1|hypothetical protein HMPREF1120_02562 [Exophiala dermatitidis NIH/UT8656]
TR677|c0_g1_i1	0	0	0	3.88	5.11	0	0	hypothetical protein HMPREF1120_02264	gi|378727629|gb|EHY54088.1|hypothetical protein HMPREF1120_02264 [Exophiala dermatitidis NIH/UT8656]
TR45457|c0_g1_i1	0	0	0	3.18	5.56	0.32	0	plasma membrane h+-atpase pma1	gi|378727478|gb|EHY53937.1|H+-transporting ATPase [Exophiala dermatitidis NIH/UT8656]
TR46752|c1_g1_i1	0	0	0	2.28	5.36	0	0	plasma membrane h+-atpase pma1	gi|378727478|gb|EHY53937.1|H+-transporting ATPase [Exophiala dermatitidis NIH/UT8656]
Mj_1_GCCAAT_L005_R1_001_(paired)_trimmed_(paired)_contig_103293	0	0	0	0.82	8.49	0	0	hypothetical protein HMPREF1120_01918	gi|378727275|gb|EHY53734.1|hypothetical protein HMPREF1120_01918 [Exophiala dermatitidis NIH/UT8656]
Mj_1_GCCAAT_L005_R1_001_(paired)_trimmed_(paired)_contig_98978	0	0	0	0.99	5.58	0	0	mitochondrial atpase subunit	gi|378726906|gb|EHY53365.1|ATP synthase subunit 4, mitochondrial [Exophiala dermatitidis NIH/UT8656]
C915615	0	0	0	3.57	7.09	0.28	0	aldehyde dehydrogenase	gi|378726445|gb|EHY52904.1|aldehyde dehydrogenase [Exophiala dermatitidis NIH/UT8656]
TR64039|c0_g1_i1	0	0	0	10.37	13.27	0.19	0	acetaldehyde dehydrogenase	gi|378726445|gb|EHY52904.1|aldehyde dehydrogenase [Exophiala dermatitidis NIH/UT8656]
TR64039|c0_g1_i3	0	0	0	8.61	9.87	1.05	0	acetaldehyde dehydrogenase	gi|378726445|gb|EHY52904.1|aldehyde dehydrogenase [Exophiala dermatitidis NIH/UT8656]
TR64039|c0_g1_i5	0	0	0	7.18	10.01	0.19	0	acetaldehyde dehydrogenase	gi|378726445|gb|EHY52904.1|aldehyde dehydrogenase [Exophiala dermatitidis NIH/UT8656]
TR64340|c1_g1_i10	0	0	0	4.15	6.24	0	0	aldehyde dehydrogenase	gi|378726445|gb|EHY52904.1|aldehyde dehydrogenase [Exophiala dermatitidis NIH/UT8656]
TR64340|c2_g1_i1	0	0	0	6.82	3.38	0.5	0	aldehyde dehydrogenase	gi|378726445|gb|EHY52904.1|aldehyde dehydrogenase [Exophiala dermatitidis NIH/UT8656]
TR66779|c3_g1_i1	0	0	0	5	6.2	0	0	aldehyde dehydrogenase	gi|378726445|gb|EHY52904.1|aldehyde dehydrogenase [Exophiala dermatitidis NIH/UT8656]
TR66779|c3_g5_i1	0	0	0	3.74	6.17	0.22	0.19	aldehyde dehydrogenase	gi|378726445|gb|EHY52904.1|aldehyde dehydrogenase [Exophiala dermatitidis NIH/UT8656]
TR66779|c3_g5_i11	0	0	0	8.35	6.55	0	0	aldehyde dehydrogenase	gi|378726445|gb|EHY52904.1|aldehyde dehydrogenase [Exophiala dermatitidis NIH/UT8656]
TR66779|c3_g5_i5	0	0	0	5.64	8.95	0.49	0	aldehyde dehydrogenase	gi|378726445|gb|EHY52904.1|aldehyde dehydrogenase [Exophiala dermatitidis NIH/UT8656]
TR82671|c0_g1_i1	0	0	0	2.59	5.28	0.3	0	hypothetical protein HMPREF1120_01022	gi|378726356|gb|EHY52815.1|hypothetical protein HMPREF1120_01022 [Exophiala dermatitidis NIH/UT8656]
Mj_1_GCCAAT_L005_R1_001_(paired)_trimmed_(paired)_contig_89731	0	0	0	2.1	5.52	0	0	glutathione-independent formaldehyde dehydrogenase	gi|378726267|gb|EHY52726.1|alcohol dehydrogenase [Exophiala dermatitidis NIH/UT8656]
TR39252|c1_g1_i1	0	0	0	3.24	5.77	0	0	hypothetical protein HMPREF1120_00834	gi|378726165|gb|EHY52624.1|hypothetical protein HMPREF1120_00834 [Exophiala dermatitidis NIH/UT8656]
Mj_1_GCCAAT_L005_R1_001_(paired)_trimmed_(paired)_contig_91674	0	0	0	2.07	5.25	0.22	0	actin cortical patch protein	gi|378726065|gb|EHY52524.1|hypothetical protein HMPREF1120_00735 [Exophiala dermatitidis NIH/UT8656]
Mj_1_GCCAAT_L005_R1_001_(paired)_trimmed_(paired)_contig_91243	0	0	0	3.96	6.09	0	0	hypothetical protein HMPREF1120_00350	gi|378725674|gb|EHY52133.1|hypothetical protein HMPREF1120_00350 [Exophiala dermatitidis NIH/UT8656]
C933752	0	0	0	8.74	9.88	0.2	0	opsin 1	gi|378725586|gb|EHY52045.1|bacteriorhodopsin [Exophiala dermatitidis NIH/UT8656]
TR72370|c4_g1_i3	0	0	0	6.99	8.09	0.55	0	opsin-1	gi|378725586|gb|EHY52045.1|bacteriorhodopsin [Exophiala dermatitidis NIH/UT8656]
TR77302|c1_g5_i16	0	0	0	3.05	5.39	0.18	0	opsin-1	gi|378725586|gb|EHY52045.1|bacteriorhodopsin [Exophiala dermatitidis NIH/UT8656]
TR77302|c1_g5_i18	0	0	0	5.41	5.09	0.16	0	opsin-1	gi|378725586|gb|EHY52045.1|bacteriorhodopsin [Exophiala dermatitidis NIH/UT8656]
TR77302|c1_g5_i7	0	0	0	3.44	6.36	0.09	0	opsin-1	gi|378725586|gb|EHY52045.1|bacteriorhodopsin [Exophiala dermatitidis NIH/UT8656]
TR50189|c1_g1_i1	0	0	0.23	5.94	1.44	0	0	conserved domain protein	gi|378725307|gb|EHY51766.1|hypothetical protein HMPREF1120_11008 (mitochondrion) [Exophiala dermatitidis NIH/UT8656]
TR57678|c0_g1_i1	0	0.17	0	5.54	1.83	0	0	hypothetical protein HMPREF1120_11008 (mitochondrion)	gi|378725307|gb|EHY51766.1|hypothetical protein HMPREF1120_11008 (mitochondrion) [Exophiala dermatitidis NIH/UT8656]
Mj_1_GCCAAT_L005_R1_001_(paired)_trimmed_(paired)_contig_79617	0	0	0	12.06	15.02	0.5	0.22	conserved domain protein	gi|378401482|emb|CCG06598.1|Putative uncharacterized protein, partial [Rhodospirillum photometricum DSM 122]
TR59454|c8_g3_i2	0	0	0	11.21	8.09	0.52	0	conserved domain protein	gi|378401482|emb|CCG06598.1|Putative uncharacterized protein, partial [Rhodospirillum photometricum DSM 122]
TR47518|c0_g1_i1	1.34	2.36	5.27	4.25	2	2.23	2.64	protein phsophatase-	gi|375152268|gb|AFA36592.1|PP2Ac-3-phosphatase 2A isoform 3, partial [Lolium perenne]
TR64532|c3_g1_i1	0.19	1.1	0.9	3.94	4.28	12.93	0.38	hypersensitive-induced response protein	gi|375152064|gb|AFA36490.1|hypersensitive induced response protein 3, partial [Lolium perenne]
Mj_1_GCCAAT_L005_R1_001_(paired)_trimmed_(paired)_contig_775	31.82	174.13	3.68	73.54	14.74	2.11	6.49	photosystem ii cp43 chlorophyll partial	gi|374974647|gb|AFA27417.1|photosystem II CP43 chlorophyll apoprotein, partial [Brocchinia micrantha]
TR58003|c0_g1_i1	5.75	4.94	3.15	1.69	1.76	0.5	2.98	glycerol-3-phosphate dehydrogenase	gi|374671169|gb|AEZ56250.1|plastid glycerol-3-phosphate dehydrogenase [Jatropha curcas]
TR58003|c0_g1_i2	5.2	5.41	4.29	2.29	1.98	0.87	2.07	glycerol-3-phosphate dehydrogenase	gi|374671169|gb|AEZ56250.1|plastid glycerol-3-phosphate dehydrogenase [Jatropha curcas]
Mj_1_GCCAAT_L005_R1_001_(paired)_trimmed_(paired)_contig_9923	12.35	24.59	4.69	5.98	8.24	4.64	6.05	pinus taeda anonymous locus 2_1716_01 genomic sequence	gi|373943293|gb|AEY80143.1|lipoic acid synthase [Jatropha curcas]
TR54154|c0_g1_i2	11.97	17.39	15.13	8.75	15.16	11.65	34.67	methionine sulfoxide reductase type	gi|372864100|gb|AEX99755.1|methionine sulfoxide reductase [Morus alba var. multicaulis]
TR55267|c0_g2_i1	22.07	21.4	7.48	55.11	19.65	6.66	16.5	ribosomal protein s12	gi|372450279|ref|YP_005090462.1|rps12 gene product (mitochondrion) [Millettia pinnata] gi|372450318|ref|YP_005090500.1| ribosomal protein S12 (mitochondrion) [Lotus japonicus] gi|316996005|dbj|BAD83444.2| ribosomal protein S12 (mitochondrion) [Nicotiana tabacum] gi|357197325|gb|AET62922.1| ribosomal protein S12 (mitochondrion) [Millettia pinnata] gi|357197364|gb|AET62960.1| ribosomal protein S12 …
TR70872|c1_g1_i6	0.32	0.42	0.58	6.23	6.8	2.12	0.98	nadh dehydrogenase subunit 5	gi|372450265|ref|YP_005090448.1|nad1 gene product (mitochondrion) [Millettia pinnata] gi|357197311|gb|AET62908.1| NADH dehydrogenase subunit 5 (mitochondrion) [Millettia pinnata]
TR72681|c0_g3_i7	0.44	0.24	0.52	6.35	3.14	1.06	0.5	nadh dehydrogenase subunit 5	gi|372450265|ref|YP_005090448.1|nad1 gene product (mitochondrion) [Millettia pinnata] gi|357197311|gb|AET62908.1| NADH dehydrogenase subunit 5 (mitochondrion) [Millettia pinnata]
scaffold10174	0.18	0.16	0.19	7.04	2.03	0.82	0.22	nadh dehydrogenase subunit 5	gi|372450265|ref|YP_005090448.1|nad1 gene product (mitochondrion) [Millettia pinnata] gi|357197311|gb|AET62908.1| NADH dehydrogenase subunit 5 (mitochondrion) [Millettia pinnata]
TR50959|c1_g1_i2	11.1	41.04	0.49	2.5	0.51	0.31	0.86	nadh-plastoquinone oxidoreductase subunit 7	gi|372450196|ref|YP_005090234.1|ndhH gene product (chloroplast) [Ricinus communis] gi|339516222|gb|AEJ82612.1| NADH dehydrogenase subunit 7 [Ricinus communis]
TR29621|c0_g1_i1	8.39	15.88	1.23	0.42	0.2	0.15	0.52	ribosomal protein l32	gi|372450188|ref|YP_005090226.1|rpl32 gene product (chloroplast) [Ricinus communis] gi|339516214|gb|AEJ82604.1| ribosomal protein L32 [Ricinus communis]
TR72157|c1_g4_i1	3.57	5.84	0.44	1.59	0.44	0.19	0.57	nadh-plastoquinone oxidoreductase subunit 5	gi|372450187|ref|YP_005090225.1|ndhF gene product (chloroplast) [Ricinus communis] gi|339516213|gb|AEJ82603.1| NADH dehydrogenase subunit 5 [Ricinus communis]
TR68142|c3_g2_i1	11.18	24.5	2.34	8.7	1.89	1.29	1.73	hypothetical chloroplast rf21	gi|372450183|ref|YP_005090221.1|ycf2 gene product (chloroplast) [Ricinus communis] gi|372450201|ref|YP_005090239.1| ycf2 gene product (chloroplast) [Ricinus communis] gi|339516209|gb|AEJ82599.1| Ycf2 [Ricinus communis] gi|339516227|gb|AEJ82617.1| Ycf2 [Ricinus communis]
TR68142|c3_g2_i2	6.24	14.37	1.21	4.5	1.6	1.02	1.23	hypothetical chloroplast rf21	gi|372450183|ref|YP_005090221.1|ycf2 gene product (chloroplast) [Ricinus communis] gi|372450201|ref|YP_005090239.1| ycf2 gene product (chloroplast) [Ricinus communis] gi|339516209|gb|AEJ82599.1| Ycf2 [Ricinus communis] gi|339516227|gb|AEJ82617.1| Ycf2 [Ricinus communis]
TR75875|c0_g3_i1	0.65	0.85	0.21	5.62	2.05	0.55	0.79	hypothetical chloroplast rf2	gi|372450183|ref|YP_005090221.1|ycf2 gene product (chloroplast) [Ricinus communis] gi|372450201|ref|YP_005090239.1| ycf2 gene product (chloroplast) [Ricinus communis] gi|339516209|gb|AEJ82599.1| Ycf2 [Ricinus communis] gi|339516227|gb|AEJ82617.1| Ycf2 [Ricinus communis]
TR50635|c1_g1_i2	2.67	7.04	0.5	6.92	2.05	0.24	1.04	photosystem ii 47 kda protein	gi|372450166|ref|YP_005090204.1|psbB gene product (chloroplast) [Ricinus communis] gi|339516192|gb|AEJ82582.1| photosystem II 47 kDa protein [Ricinus communis]
TR53352|c1_g1_i1	2.82	7.98	0.56	9.89	2.45	0.12	0.92	photosystem ii 47 kda protein	gi|372450166|ref|YP_005090204.1|psbB gene product (chloroplast) [Ricinus communis] gi|339516192|gb|AEJ82582.1| photosystem II 47 kDa protein [Ricinus communis]
TR53352|c1_g1_i2	1.91	7.66	0.35	8.02	1.89	0.08	0.84	photosystem ii 47 kda protein	gi|372450166|ref|YP_005090204.1|psbB gene product (chloroplast) [Ricinus communis] gi|339516192|gb|AEJ82582.1| photosystem II 47 kDa protein [Ricinus communis]
TR53352|c1_g1_i3	2.51	7.18	0.28	8.18	1.98	0.16	0.95	photosystem ii 47 kda protein	gi|372450166|ref|YP_005090204.1|psbB gene product (chloroplast) [Ricinus communis] gi|339516192|gb|AEJ82582.1| photosystem II 47 kDa protein [Ricinus communis]
TR53352|c1_g1_i4	2.34	8.11	0.38	9	2.26	0.29	1.12	photosystem ii 47 kda protein	gi|372450166|ref|YP_005090204.1|psbB gene product (chloroplast) [Ricinus communis] gi|339516192|gb|AEJ82582.1| photosystem II 47 kDa protein [Ricinus communis]
TR53352|c1_g1_i5	2.13	7.29	0.35	9.36	1.75	0.27	0.99	photosystem ii 47 kda protein	gi|372450166|ref|YP_005090204.1|psbB gene product (chloroplast) [Ricinus communis] gi|339516192|gb|AEJ82582.1| photosystem II 47 kDa protein [Ricinus communis]
TR53352|c1_g1_i8	2.31	8.22	0.58	8.93	2.46	0.3	1.13	photosystem ii 47 kda protein	gi|372450166|ref|YP_005090204.1|psbB gene product (chloroplast) [Ricinus communis] gi|339516192|gb|AEJ82582.1| photosystem II 47 kDa protein [Ricinus communis]
scaffold10618	5.82	14.59	0.78	6.91	1.42	0.37	0.96	photosystem ii 47 kda protein	gi|372450166|ref|YP_005090204.1|psbB gene product (chloroplast) [Ricinus communis] gi|339516192|gb|AEJ82582.1| photosystem II 47 kDa protein [Ricinus communis]
TR53352|c0_g1_i1	3.99	12.26	0.74	19.59	4.04	0.43	2.25	photosystem i p700 apoprotein a2	gi|372450138|ref|YP_005090177.1|psaB gene product (chloroplast) [Ricinus communis] gi|339516164|gb|AEJ82554.1| photosystem I P700 chlorophyll a [Ricinus communis]
TR53352|c0_g1_i2	4.35	12.94	0.72	19.4	4.06	0.46	1.9	photosystem i p700 apoprotein a2	gi|372450138|ref|YP_005090177.1|psaB gene product (chloroplast) [Ricinus communis] gi|339516164|gb|AEJ82554.1| photosystem I P700 chlorophyll a [Ricinus communis]
Mj_1_GCCAAT_L005_R1_001_(paired)_trimmed_(paired)_contig_6753	4.32	20.36	0.4	2.64	0.54	0.18	0.42	rna polymerase beta subunit	gi|372450129|ref|YP_005090168.1|rpoC2 gene product (chloroplast) [Ricinus communis] gi|339516155|gb|AEJ82545.1| RNA polymerase beta subunit [Ricinus communis]
TR72220|c0_g2_i1	7.96	6.31	4.76	5.36	6.46	4.5	8.52	granule-bound starch partial	gi|371940669|dbj|BAL45308.1|granule-bound starch synthase, partial [Mitella stylosa var. stylosa]
TR58864|c0_g2_i4	0	0	0	7.05	2.73	0	0	conserved domain protein	gi|371552241|gb|EHN79496.1|hypothetical protein SMCF_951 [Streptomyces coelicoflavus ZG0656]
TR77785|c0_g7_i1	16.25	10.21	5.31	3.07	5.41	4.01	7.38	peroxidase 10	gi|369794151|gb|AEX20392.1|putative class III peroxidase [Coffea arabica x Coffea canephora]
TR78406|c0_g5_i7	16.04	9.58	8.36	5.64	6.24	3.81	10.64	peroxidase 10	gi|369794151|gb|AEX20392.1|putative class III peroxidase [Coffea arabica x Coffea canephora]
Mj_1_GCCAAT_L005_R1_001_(paired)_trimmed_(paired)_contig_94011	0	0	0	2.27	7.75	0	0	superoxide dismutase	gi|367021508|ref|XP_003660039.1|hypothetical protein MYCTH_2297816 [Myceliophthora thermophila ATCC 42464] gi|347007306|gb|AEO54794.1| hypothetical protein MYCTH_2297816 [Myceliophthora thermophila ATCC 42464]
Mj_1_GCCAAT_L005_R1_001_(paired)_trimmed_(paired)_contig_3910	47.34	48.17	47.4	47.49	53.13	60.96	37.13	casein kinase ii alpha subunit	gi|363814459|ref|NP_001242864.1|uncharacterized protein LOC100820471 precursor [Glycine max] gi|255638871|gb|ACU19738.1| unknown [Glycine max]
TR59365|c0_g2_i1	72.08	73.79	73.13	74.8	78.6	89.2	56.18	casein kinase ii subunit alpha-2-like	gi|363814459|ref|NP_001242864.1|uncharacterized protein LOC100820471 precursor [Glycine max] gi|255638871|gb|ACU19738.1| unknown [Glycine max]
scaffold11686	35.52	34.55	34.71	37.7	34.74	44.69	26.53	casein kinase ii subunit alpha-2-like	gi|363814459|ref|NP_001242864.1|uncharacterized protein LOC100820471 precursor [Glycine max] gi|255638871|gb|ACU19738.1| unknown [Glycine max]
TR59849|c1_g2_i2	6.82	7.13	10.89	13.66	11.87	13.18	14.75	protein	gi|363808300|ref|NP_001242244.1|uncharacterized protein LOC100783451 [Glycine max] gi|255641128|gb|ACU20842.1| unknown [Glycine max]
TR47839|c0_g1_i1	21.03	12.65	25.77	12.64	17.44	9.82	22.19	tryptophan rna-binding attenuator protein	gi|363808166|ref|NP_001242226.1|uncharacterized protein LOC100799063 [Glycine max] gi|255639877|gb|ACU20231.1| unknown [Glycine max] gi|255640131|gb|ACU20356.1| unknown [Glycine max]
Mj_1_GCCAAT_L005_R1_001_(paired)_trimmed_(paired)_contig_18228	10.91	5	9.89	7.72	7.64	8.11	6.87	elongation factor 1-gamma	gi|363808162|ref|NP_001242737.1|uncharacterized protein LOC100810452 [Glycine max] gi|255635419|gb|ACU18062.1| unknown [Glycine max]
TR64626|c1_g1_i7	8.13	5.41	5.14	2.09	2.88	2.34	3.19	translin-associated protein x	gi|363807852|ref|NP_001242186.1|uncharacterized protein LOC100776523 [Glycine max] gi|255644471|gb|ACU22739.1| unknown [Glycine max]
TR65123|c0_g1_i1	2.01	11.76	13.78	1.03	1.62	0.16	6.81	gdsl esterase lipase exl3-like	gi|363807102|ref|NP_001242335.1|uncharacterized protein LOC100810354 [Glycine max] gi|255638862|gb|ACU19734.1| unknown [Glycine max]
TR62635|c3_g1_i2	5.93	4.17	12.85	3.96	8.16	4.15	14.15	upf0451 protein c17orf61 homolog	gi|363806728|ref|NP_001242016.1|uncharacterized protein LOC100816932 [Glycine max] gi|255640740|gb|ACU20654.1| unknown [Glycine max]
Mj_1_GCCAAT_L005_R1_001_(paired)_trimmed_(paired)_contig_20469	4.33	4	16.76	7.54	10.23	2.17	7.43	protein	gi|363497940|gb|AEW24433.1|ubiquitin-conjugating enzyme E2 [Camellia sinensis]
Mj_1_GCCAAT_L005_R1_001_(paired)_trimmed_(paired)_contig_94909	0	0	0	0.13	11.3	0	0	polygalacturonase 1	gi|361132085|gb|EHL03700.1|putative endo-polygalacturonase [Glarea lozoyensis 74030]
Mj_1_GCCAAT_L005_R1_001_(paired)_trimmed_(paired)_contig_98050	0	0	0	0	5.42	0	0	hypothetical protein M7I_0707	gi|361131523|gb|EHL03196.1|hypothetical protein M7I_0707 [Glarea lozoyensis 74030]
C959408	0	0	0	0.15	5.52	0	0	alcohol zinc-	gi|361129287|gb|EHL01199.1|putative Sorbitol dehydrogenase [Glarea lozoyensis 74030]
TR78195|c1_g3_i5	0	0	0	5.24	11.5	0	0	translation elongation factor partial	gi|361129097|gb|EHL01016.1|putative Elongation factor 1-alpha [Glarea lozoyensis 74030]
Mj_1_GCCAAT_L005_R1_001_(paired)_trimmed_(paired)_contig_105233	0	0	0	0	5.85	0	0	60s ribosomal protein l14	gi|361128868|gb|EHL00793.1|putative Nascent polypeptide-associated complex subunit alpha [Glarea lozoyensis 74030]
C966588	0	0	0	0	8.3	0	0	covalently-linked cell wall protein	gi|361128209|gb|EHL00155.1|putative Cell wall mannoprotein PIR3 [Glarea lozoyensis 74030]
TR10959|c0_g1_i1	0	0	0	5.94	10.92	0	0.18	upf0591 membrane protein	gi|361127728|gb|EHK99687.1|putative UPF0591 membrane protein C15E1.02c [Glarea lozoyensis 74030]
TR86321|c0_g1_i1	0	0	0	0	7.74	0	0	opsin 1	gi|361127554|gb|EHK99518.1|putative Opsin-1 [Glarea lozoyensis 74030]
TR32482|c0_g3_i1	0	0	0	0	6.05	0	0	60s acidic ribosomal protein p2	gi|361126868|gb|EHK98854.1|putative 60S acidic ribosomal protein P2 [Glarea lozoyensis 74030]
TR788|c0_g1_i1	0	0	0	9.56	9.32	0.24	0	60s acidic ribosomal protein p2	gi|361126868|gb|EHK98854.1|putative 60S acidic ribosomal protein P2 [Glarea lozoyensis 74030]
TR117421|c0_g1_i1	0	0	0	0	13.19	0	0	hypothetical protein M7I_5576	gi|361126594|gb|EHK98587.1|hypothetical protein M7I_5576 [Glarea lozoyensis 74030]
TR105682|c0_g1_i1	0	0	0	0	15.37	0	0	#NAME?	gi|361125935|gb|EHK97954.1|hypothetical protein M7I_6295 [Glarea lozoyensis 74030]
C928286	2.64	2.91	2.39	4.5	3.03	7.42	2.4	eukaryotic translation initiation factor 2 subunit 3	gi|359811337|ref|NP_001241486.1|uncharacterized protein LOC100784099 [Glycine max] gi|255637109|gb|ACU18886.1| unknown [Glycine max]
TR12488|c0_g1_i1	15.36	14.73	23.29	27.55	18.57	26.42	15.87	eukaryotic translation initiation factor 2 subunit 3	gi|359811337|ref|NP_001241486.1|uncharacterized protein LOC100784099 [Glycine max] gi|255637109|gb|ACU18886.1| unknown [Glycine max]
TR63910|c0_g2_i1	19.17	14.51	25.32	33.48	27.63	31.43	19	eukaryotic translation initiation factor 2 subunit 3	gi|359811337|ref|NP_001241486.1|uncharacterized protein LOC100784099 [Glycine max] gi|255637109|gb|ACU18886.1| unknown [Glycine max]
TR63910|c0_g2_i3	15.57	11.83	14.12	23.17	18.88	22.41	13.93	eukaryotic translation initiation factor 2 subunit 3	gi|359811337|ref|NP_001241486.1|uncharacterized protein LOC100784099 [Glycine max] gi|255637109|gb|ACU18886.1| unknown [Glycine max]
TR74843|c2_g1_i1	15.9	11.13	25.27	25.26	25.39	22.97	14.9	50s ribosomal protein l17	gi|359807620|ref|NP_001240907.1|uncharacterized protein LOC100785280 [Glycine max] gi|255640336|gb|ACU20456.1| unknown [Glycine max]
TR74843|c2_g1_i2	8.12	6.06	15.09	10.74	15.41	13.18	8.02	50s ribosomal protein l17	gi|359807620|ref|NP_001240907.1|uncharacterized protein LOC100785280 [Glycine max] gi|255640336|gb|ACU20456.1| unknown [Glycine max]
TR61321|c2_g1_i3	0	0	0	1.63	10.29	0.65	0	40s ribosomal protein s25-4	gi|359807542|ref|NP_001241406.1|40S ribosomal protein S25 [Glycine max] gi|255626191|gb|ACU13440.1| unknown [Glycine max] gi|255647156|gb|ACU24046.1| unknown [Glycine max]
TR49205|c0_g1_i1	24.91	16.79	27	26.03	23.07	24.47	22.88	co-chaperone protein sba1	gi|359807469|ref|NP_001241395.1|uncharacterized protein LOC100796372 [Glycine max] gi|255644738|gb|ACU22871.1| unknown [Glycine max]
scaffold13384	16.03	28.6	15.52	7.52	11.94	2.02	30.02	haloacid dehalogenase-like hydrolase domain-containing protein	gi|359807365|ref|NP_001241637.1|uncharacterized protein LOC100795391 [Glycine max] gi|255640503|gb|ACU20537.1| unknown [Glycine max]
TR41813|c0_g1_i1	151.24	70.08	130.56	103.36	117.76	82.06	109.79	60s ribosomal protein	gi|359806725|ref|NP_001241295.1|uncharacterized protein LOC100818880 [Glycine max] gi|255647307|gb|ACU24120.1| unknown [Glycine max]
TR57577|c0_g1_i1	113.83	59.7	111.35	85.48	111.55	95.53	116.93	small nuclear ribonucleoprotein d2	gi|359806642|ref|NP_001241022.1|uncharacterized protein LOC100793233 [Glycine max] gi|255633912|gb|ACU17317.1| unknown [Glycine max]
TR79475|c1_g1_i3	11.26	10.62	13.74	14.44	13.4	19.45	9.77	vascular protein	gi|359497569|ref|XP_002266558.2|PREDICTED: uncharacterized protein LOC100254837, partial [Vitis vinifera] gi|296087031|emb|CBI33295.3| unnamed protein product [Vitis vinifera]
Mj_1_GCCAAT_L005_R1_001_(paired)_trimmed_(paired)_contig_1933	1.9	1.24	2.21	1.93	1.56	2.73	5.59	pentatricopeptide repeat-containing protein	gi|359497567|ref|XP_002265980.2|PREDICTED: pentatricopeptide repeat-containing protein At4g16835, mitochondrial-like, partial [Vitis vinifera]
TR58176|c0_g5_i4	4.15	2.29	4.7	5.32	4.53	5.67	1.42	PREDICTED: uncharacterized protein LOC100854766 isoform 1	gi|359496852|ref|XP_003635355.1|PREDICTED: uncharacterized protein LOC100854766 isoform 1 [Vitis vinifera]
Mj_1_GCCAAT_L005_R1_001_(paired)_trimmed_(paired)_contig_11872	4.5	4.32	5.01	0.79	2.23	2.49	1.97	nudix hydrolase	gi|359496846|ref|XP_002272372.2|PREDICTED: uncharacterized protein LOC100258406 [Vitis vinifera]
TR46219|c0_g1_i1	9.76	5.36	13.14	25.99	25.69	11.99	15.35	malate glyoxysomal	gi|359496625|ref|XP_002263670.2|PREDICTED: malate dehydrogenase, glyoxysomal [Vitis vinifera] gi|297739396|emb|CBI29427.3| unnamed protein product [Vitis vinifera]
TR68731|c1_g1_i1	4.68	8.46	5.89	4.09	4.85	4.04	3.97	plac8 domain-containing protein	gi|359496529|ref|XP_002272810.2|PREDICTED: protein MID1-COMPLEMENTING ACTIVITY 1-like [Vitis vinifera]
TR68731|c1_g1_i2	8.62	12.86	10.32	8.39	7.83	9.96	10.06	plac8 domain-containing protein	gi|359496529|ref|XP_002272810.2|PREDICTED: protein MID1-COMPLEMENTING ACTIVITY 1-like [Vitis vinifera]
scaffold13457	5.35	9.19	6.12	5.96	5.19	5.05	6.39	plac8 domain-containing protein	gi|359496529|ref|XP_002272810.2|PREDICTED: protein MID1-COMPLEMENTING ACTIVITY 1-like [Vitis vinifera]
TR62594|c0_g1_i3	6.84	9.77	1.01	0.11	0.32	0.16	1.41	phosphoglycerate bisphosphoglycerate mutase family protein	gi|359496158|ref|XP_002262974.2|PREDICTED: probable phosphoglycerate mutase gpmB-like, partial [Vitis vinifera]
TR61356|c2_g1_i7	3.03	7.95	2.32	8.98	9.07	10.45	3.33	oligopeptide transporter opt family	gi|359496107|ref|XP_002273768.2|PREDICTED: oligopeptide transporter 3-like [Vitis vinifera]
TR43199|c0_g2_i1	0.12	0.11	0.97	3.55	9.87	1.31	2.56	polyneuridine-aldehyde esterase	gi|359496065|ref|XP_002263026.2|PREDICTED: polyneuridine-aldehyde esterase-like [Vitis vinifera]
TR43199|c0_g2_i2	0.43	0.2	0.63	3.4	9.14	1.79	1.79	polyneuridine-aldehyde esterase	gi|359496065|ref|XP_002263026.2|PREDICTED: polyneuridine-aldehyde esterase-like [Vitis vinifera]
TR63164|c0_g1_i3	2.47	1.57	3.96	3.28	7.53	2.84	4.28	meiotically up-regulated gene 66 protein	gi|359496063|ref|XP_002270399.2|PREDICTED: autophagy-related protein 101 [Vitis vinifera] gi|297735844|emb|CBI18564.3| unnamed protein product [Vitis vinifera]
TR65618|c0_g1_i2	2.26	1.81	4.47	3.59	6.05	1.72	4.34	meiotically up-regulated gene 66 protein	gi|359496063|ref|XP_002270399.2|PREDICTED: autophagy-related protein 101 [Vitis vinifera] gi|297735844|emb|CBI18564.3| unnamed protein product [Vitis vinifera]
TR79884|c1_g3_i2	11	13.73	11.98	24.32	13.07	21.83	9.19	af478371_1gag-pol polyprotein	gi|359495786|ref|XP_002272586.2|PREDICTED: uncharacterized protein LOC100248980 [Vitis vinifera]
Mj_1_GCCAAT_L005_R1_001_(paired)_trimmed_(paired)_contig_8280	38.07	27.65	7.65	3.04	2.93	3.53	5.06	pentatricopeptide repeat-containing protein chloroplastic-like	gi|359495626|ref|XP_002269600.2|PREDICTED: pentatricopeptide repeat-containing protein At4g16390, chloroplastic [Vitis vinifera]
TR75239|c1_g1_i7	4.8	4.9	10.72	13.13	17.07	23.88	6.53	eto1-like protein 1-like	gi|359495432|ref|XP_002280519.2|PREDICTED: ETO1-like protein 1-like [Vitis vinifera] gi|296084480|emb|CBI25039.3| unnamed protein product [Vitis vinifera]
TR69769|c1_g1_i7	4.4	4.75	7.56	3.22	4.83	5.02	8.66	galactosyltransferase family protein	gi|359494044|ref|XP_002279814.2|PREDICTED: probable beta-1,3-galactosyltransferase 2-like isoform 1 [Vitis vinifera] gi|297737446|emb|CBI26647.3| unnamed protein product [Vitis vinifera]
TR75213|c0_g1_i3	7.91	8.13	9.31	6.43	5.53	6.14	9.02	protein club	gi|359493878|ref|XP_002281921.2|PREDICTED: uncharacterized protein LOC100253761 [Vitis vinifera]
TR70953|c1_g2_i6	9.17	7.64	1.52	1.03	2.13	0.72	0.89	leucine-rich repeat-containing protein	gi|359493861|ref|XP_003634682.1|PREDICTED: leucine-rich repeat-containing protein 40-like isoform 2 [Vitis vinifera] gi|302143032|emb|CBI20327.3| unnamed protein product [Vitis vinifera]
TR72544|c1_g1_i1	11.08	9.42	13.16	19.14	14.75	16.24	15.54	protein	gi|359493461|ref|XP_002265921.2|PREDICTED: uncharacterized protein LOC100249450 [Vitis vinifera]
TR68159|c0_g1_i1	23.73	23.04	10.58	10.67	12.19	11.77	17.91	adenylate kinase	gi|359493416|ref|XP_003634590.1|PREDICTED: probable adenylate kinase 2, chloroplastic-like [Vitis vinifera]
scaffold14345	10.67	10.99	3.93	3.17	5.98	4.62	6.08	adenylate kinase	gi|359493416|ref|XP_003634590.1|PREDICTED: probable adenylate kinase 2, chloroplastic-like [Vitis vinifera]
TR59403|c0_g1_i2	13.5	8.92	10.88	12.84	12.27	15.95	13.28	polypyrimidine tract-binding protein 3	gi|359493143|ref|XP_002264763.2|PREDICTED: polypyrimidine tract-binding protein homolog 3 isoform 2 [Vitis vinifera]
Mj_1_GCCAAT_L005_R1_001_(paired)_trimmed_(paired)_contig_6044	15.65	18.68	46	17.75	31.33	8.4	109.03	isoliquiritigenin 2 -o-methyltransferase	gi|359493096|ref|XP_002270704.2|PREDICTED: caffeic acid 3-O-methyltransferase-like isoform 2 [Vitis vinifera]
TR60801|c0_g1_i1	56.37	77.47	154.73	65.1	98.65	29.99	410.73	caffeic acid o-methyltransferase	gi|359493096|ref|XP_002270704.2|PREDICTED: caffeic acid 3-O-methyltransferase-like isoform 2 [Vitis vinifera]
scaffold13579	23.2	28.36	57.51	25.39	38.21	11.9	152.64	caffeic acid o-methyltransferase	gi|359493096|ref|XP_002270704.2|PREDICTED: caffeic acid 3-O-methyltransferase-like isoform 2 [Vitis vinifera]
TR74420|c0_g1_i7	16.88	11.2	13.62	16.46	13.76	21.28	13.18	translation initiation factor eif-5b	gi|359493041|ref|XP_002267014.2|PREDICTED: uncharacterized protein LOC100242745 [Vitis vinifera]
Mj_1_GCCAAT_L005_R1_001_(paired)_trimmed_(paired)_contig_27666	5.85	4.36	5.71	4.08	7.9	8.24	10.98	atp binding protein	gi|359493032|ref|XP_002264745.2|PREDICTED: serine/threonine-protein kinase HT1-like [Vitis vinifera]
Mj_1_GCCAAT_L005_R1_001_(paired)_trimmed_(paired)_contig_1269	102.94	58.62	203.71	205.94	145.71	181.68	88.57	14-3-3 protein	gi|359492889|ref|XP_003634479.1|PREDICTED: 14-3-3 protein [Vitis vinifera]
TR43292|c0_g1_i1	132.97	72.03	286.22	256.19	201.57	241.7	112.01	14-3-3 protein	gi|359492889|ref|XP_003634479.1|PREDICTED: 14-3-3 protein [Vitis vinifera]
Mj_1_GCCAAT_L005_R1_001_(paired)_trimmed_(paired)_contig_4429	6.08	13.55	2.88	0.77	1.17	1.02	3.51	pentatricopeptide repeat-containing protein	gi|359492783|ref|XP_002278486.2|PREDICTED: pentatricopeptide repeat-containing protein At3g21470 [Vitis vinifera]
Mj_1_GCCAAT_L005_R1_001_(paired)_trimmed_(paired)_contig_7838	0.62	0.2	4.65	1.55	3.44	0.85	5.89	dihydroflavonol 4-reductase	gi|359492685|ref|XP_002281758.2|PREDICTED: dihydroflavonol-4-reductase-like [Vitis vinifera]
TR69323|c0_g1_i2	0.61	0.23	3.82	2.05	3.78	1.71	6.66	dihydroflavonol 4-reductase	gi|359492685|ref|XP_002281758.2|PREDICTED: dihydroflavonol-4-reductase-like [Vitis vinifera]
TR69323|c0_g1_i3	0.42	0.32	3.97	1.34	3.04	1.13	5.91	dihydroflavonol 4-reductase	gi|359492685|ref|XP_002281758.2|PREDICTED: dihydroflavonol-4-reductase-like [Vitis vinifera]
TR69323|c0_g1_i4	0.71	0.81	4.5	2.18	2.56	1.32	5.18	dihydroflavonol 4-reductase	gi|359492685|ref|XP_002281758.2|PREDICTED: dihydroflavonol-4-reductase-like [Vitis vinifera]
TR69323|c0_g1_i5	0.45	0.37	4.11	2.78	3.79	1.59	7.29	dihydroflavonol 4-reductase	gi|359492685|ref|XP_002281758.2|PREDICTED: dihydroflavonol-4-reductase-like [Vitis vinifera]
TR64898|c0_g4_i1	5.95	4.1	0.28	0	0	0	0.94	caffeic acid 3-o-methyltransferase	gi|359492542|ref|XP_003634428.1|PREDICTED: caffeic acid 3-O-methyltransferase-like [Vitis vinifera]
TR77639|c1_g2_i1	6.26	5.2	0.49	0	0	0	1.85	caffeic acid methyltransferase	gi|359492542|ref|XP_003634428.1|PREDICTED: caffeic acid 3-O-methyltransferase-like [Vitis vinifera]
TR33456|c0_g1_i1	8.37	4.73	4.05	0	0.96	0.48	4.02	PREDICTED: uncharacterized protein LOC100260890	gi|359492530|ref|XP_002283504.2|PREDICTED: uncharacterized protein LOC100260890 [Vitis vinifera]
TR63515|c0_g2_i2	6.88	4.1	1.47	0.4	1.97	0.07	3.15	alcohol dehydrogenase-like 1	gi|359492460|ref|XP_002285748.2|PREDICTED: alcohol dehydrogenase-like 1 [Vitis vinifera]
TR59421|c0_g3_i1	10.57	9.87	18.27	21.25	16.37	27.55	10.9	protein	gi|359492453|ref|XP_002284086.2|PREDICTED: serine/threonine-protein phosphatase 2A activator-like [Vitis vinifera]
TR67083|c1_g1_i2	15.6	12.43	20.56	31.66	21.45	32.79	14.29	protein	gi|359492453|ref|XP_002284086.2|PREDICTED: serine/threonine-protein phosphatase 2A activator-like [Vitis vinifera]
Mj_1_GCCAAT_L005_R1_001_(paired)_trimmed_(paired)_contig_5535	60.96	124.99	9.43	2.5	3.21	2.22	18.2	ferredoxin--nadp+ reductase	gi|359492254|ref|XP_002274366.2|PREDICTED: ferredoxin--NADP reductase, leaf isozyme, chloroplastic-like [Vitis vinifera] gi|302142677|emb|CBI19880.3| unnamed protein product [Vitis vinifera]
TR79005|c1_g10_i3	18.6	19.34	20.29	25.84	29.04	23.07	15.85	tetratricopeptide repeat protein 33-like	gi|359492242|ref|XP_002284637.2|PREDICTED: tetratricopeptide repeat protein 33-like [Vitis vinifera]
TR75523|c1_g4_i1	3.79	1.42	5.58	2.15	4.26	2.86	2.67	5 -3 exoribonuclease 3-like	gi|359492219|ref|XP_002280236.2|PREDICTED: 5'-3' exoribonuclease 3-like [Vitis vinifera]
TR48509|c0_g1_i1	4.57	2.49	20.93	1.81	4.14	0	3.05	saur family protein	gi|359492215|ref|XP_003634383.1|PREDICTED: indole-3-acetic acid-induced protein ARG7 [Vitis vinifera] gi|147807620|emb|CAN73226.1| hypothetical protein VITISV_026201 [Vitis vinifera]
Mj_1_GCCAAT_L005_R1_001_(paired)_trimmed_(paired)_contig_25046	1.46	1.48	2.06	4.18	8.76	7.59	4.9	bifunctional nuclease in basal defense response 1	gi|359492154|ref|XP_003634371.1|PREDICTED: uncharacterized protein LOC100855103 [Vitis vinifera]
Mj_1_GCCAAT_L005_R1_001_(paired)_trimmed_(paired)_contig_10656	7.31	4.81	4.59	1.12	1.64	1.26	4.83	protein far1-related sequence 5-like	gi|359491925|ref|XP_002273512.2|PREDICTED: protein FAR1-RELATED SEQUENCE 5-like [Vitis vinifera]
Mj_1_GCCAAT_L005_R1_001_(paired)_trimmed_(paired)_contig_8061	5.89	6.56	4.25	13.7	9.93	17.5	7.22	nf-x1-type zinc finger protein nfxl1-like	gi|359491532|ref|XP_002279249.2|PREDICTED: NF-X1-type zinc finger protein NFXL1-like [Vitis vinifera]
Mj_1_GCCAAT_L005_R1_001_(paired)_trimmed_(paired)_contig_2376	3.25	2.49	2.81	1.71	4.2	3.59	7.68	partial	gi|359491528|ref|XP_002279128.2|PREDICTED: transcription factor WER-like [Vitis vinifera] gi|297733776|emb|CBI15023.3| unnamed protein product [Vitis vinifera]
TR74835|c3_g1_i1	7.17	2.09	6.12	4.23	5.02	3.99	1.48	glabrous 1	gi|359491528|ref|XP_002279128.2|PREDICTED: transcription factor WER-like [Vitis vinifera] gi|297733776|emb|CBI15023.3| unnamed protein product [Vitis vinifera]
scaffold13747	5.21	1.77	3.96	0.53	3.27	2.24	0.66	myb transcription factor	gi|359491528|ref|XP_002279128.2|PREDICTED: transcription factor WER-like [Vitis vinifera] gi|297733776|emb|CBI15023.3| unnamed protein product [Vitis vinifera]
Mj_1_GCCAAT_L005_R1_001_(paired)_trimmed_(paired)_contig_17908	3.22	2.83	2.18	3.91	4.35	3.46	7.2	ketose-bisphosphate aldolase class-ii-like protein	gi|359491523|ref|XP_002278967.2|PREDICTED: uncharacterized protein LOC100262718 [Vitis vinifera]
TR78722|c0_g1_i1	5.51	4.97	5.99	7.37	7.91	6.64	12.97	ketose-bisphosphate aldolase class-ii-like protein	gi|359491523|ref|XP_002278967.2|PREDICTED: uncharacterized protein LOC100262718 [Vitis vinifera]
TR78722|c0_g1_i3	2.98	2.94	2.18	5.25	4.23	3.87	8.18	ketose-bisphosphate aldolase class-ii-like protein	gi|359491523|ref|XP_002278967.2|PREDICTED: uncharacterized protein LOC100262718 [Vitis vinifera]
Mj_1_GCCAAT_L005_R1_001_(paired)_trimmed_(paired)_contig_20606	3.07	1.59	1.94	3.49	3.79	5.97	3.56	protein kinase	gi|359491503|ref|XP_003634285.1|PREDICTED: uncharacterized protein LOC100854850 [Vitis vinifera]
TR79259|c0_g1_i1	3.74	2.8	3.07	6.8	6.81	10.04	4.17	protein kinase	gi|359491503|ref|XP_003634285.1|PREDICTED: uncharacterized protein LOC100854850 [Vitis vinifera]
TR60358|c0_g1_i2	3.32	8.04	3.21	9.98	12.15	19.3	12.17	cytochrome p450	gi|359491185|ref|XP_002276558.2|PREDICTED: cytochrome P450 71A1-like [Vitis vinifera]
TR66231|c0_g1_i3	5.89	2.25	2.57	5.03	3.56	4.13	1.62	zinc finger protein chloroplastic-like	gi|359491033|ref|XP_002278671.2|PREDICTED: zinc finger protein VAR3, chloroplastic-like [Vitis vinifera] gi|297734333|emb|CBI15580.3| unnamed protein product [Vitis vinifera]
TR66231|c0_g1_i4	6.63	2.05	2.47	4.27	4.37	4.87	1.73	zinc finger protein chloroplastic-like	gi|359491033|ref|XP_002278671.2|PREDICTED: zinc finger protein VAR3, chloroplastic-like [Vitis vinifera] gi|297734333|emb|CBI15580.3| unnamed protein product [Vitis vinifera]
TR56865|c0_g1_i1	23.46	20.89	111.34	235.16	504.68	243.71	24.96	lipid transfer protein	gi|359490972|ref|XP_002279379.2|PREDICTED: non-specific lipid-transfer protein 2-like [Vitis vinifera]
TR59393|c0_g1_i1	12.8	12.44	21.11	15.52	16.85	13.97	19.69	rna binding protein	gi|359490714|ref|XP_002276446.2|PREDICTED: probable RNA-binding protein EIF1AD-like [Vitis vinifera]
TR72523|c0_g2_i1	3.13	2.23	1	2.49	3.24	4.59	6.89	kinase family protein	gi|359490160|ref|XP_002266973.2|PREDICTED: U-box domain-containing protein 35-like [Vitis vinifera]
TR73771|c0_g1_i1	3.27	4.03	5.62	5.81	7.49	4.7	8.76	u-box domain-containing protein 33-like	gi|359489801|ref|XP_002274993.2|PREDICTED: U-box domain-containing protein 33-like [Vitis vinifera] gi|297745303|emb|CBI40383.3| unnamed protein product [Vitis vinifera]
Mj_1_GCCAAT_L005_R1_001_(paired)_trimmed_(paired)_contig_22735	4.67	2.04	3.88	4.7	3.74	5.52	2.04	pentatricopeptide repeat-containing protein	gi|359489786|ref|XP_002271725.2|PREDICTED: pentatricopeptide repeat-containing protein At5g16860-like [Vitis vinifera]
Mj_1_GCCAAT_L005_R1_001_(paired)_trimmed_(paired)_contig_66559	0.06	0	0	0.09	0	0	5	kdel motif-containing protein 1	gi|359489773|ref|XP_002273091.2|PREDICTED: O-glucosyltransferase rumi-like [Vitis vinifera]
TR67923|c2_g2_i11	8.91	11.21	2.72	2.03	3.34	2.04	5.89	golgin candidate 1	gi|359489475|ref|XP_002267721.2|PREDICTED: conserved oligomeric Golgi complex subunit 4-like [Vitis vinifera]
TR77408|c0_g1_i3	21.95	18.96	20.07	27.69	15.23	41.42	22.94	translation initiation factor eif-4f	gi|359489318|ref|XP_002269466.2|PREDICTED: eukaryotic translation initiation factor 4G-like [Vitis vinifera]
TR52682|c0_g1_i1	1.09	0	2.95	0.09	0	0.06	5.44	protein wax2-like	gi|359489252|ref|XP_002263787.2|PREDICTED: protein WAX2-like [Vitis vinifera]
Mj_1_GCCAAT_L005_R1_001_(paired)_trimmed_(paired)_contig_283	66.4	43.69	80.39	93.43	86.38	76.77	78.13	rna binding	gi|359489211|ref|XP_002272562.2|PREDICTED: uncharacterized protein LOC100259885 [Vitis vinifera]
TR67764|c0_g1_i3	6.27	3.72	8.09	6.01	5.97	6.01	7.06	cop9 signalosome complex subunit 7	gi|359489202|ref|XP_003633896.1|PREDICTED: COP9 signalosome complex subunit 7 isoform 2 [Vitis vinifera]
TR67764|c0_g1_i5	6.36	4.49	8.99	5.37	7.76	5.59	6.58	cop9 signalosome complex subunit 7	gi|359489202|ref|XP_003633896.1|PREDICTED: COP9 signalosome complex subunit 7 isoform 2 [Vitis vinifera]
TR53884|c0_g1_i1	9.89	7.08	15.79	9.28	16.8	11.36	11.51	cyclin-dependent kinase a	gi|359489125|ref|XP_002266125.2|PREDICTED: cell division control protein 2 homolog [Vitis vinifera] gi|297744790|emb|CBI38058.3| unnamed protein product [Vitis vinifera]
TR71298|c0_g1_i2	12.88	11.57	6.73	6.37	6.01	6.32	4.78	rubisco methyltransferase family protein	gi|359488614|ref|XP_003633789.1|PREDICTED: histone-lysine N-methyltransferase setd3 isoform 2 [Vitis vinifera]
TR73859|c0_g2_i2	15.32	23.95	19.26	13.61	12.64	8.58	16.37	yellow stripe-like protein	gi|359488468|ref|XP_003633761.1|PREDICTED: probable metal-nicotianamine transporter YSL6-like isoform 2 [Vitis vinifera]
TR45115|c0_g1_i1	12.51	2.32	9.27	7.67	12.64	8.04	9.54	60s ribosomal protein l7a	gi|359488461|ref|XP_002274777.2|PREDICTED: 60S ribosomal protein L7a-like [Vitis vinifera]
TR67747|c4_g1_i1	2.16	1.7	0.66	5.39	1.41	1.99	1.67	PREDICTED: uncharacterized protein LOC100852570	gi|359488408|ref|XP_003633755.1|PREDICTED: uncharacterized protein LOC100852570 [Vitis vinifera]
TR79726|c0_g1_i1	4.04	3.92	4.47	9.41	6.66	13.93	5.35	e3 ubiquitin-protein ligase ubr4	gi|359488327|ref|XP_003633742.1|PREDICTED: LOW QUALITY PROTEIN: auxin transport protein BIG-like [Vitis vinifera]
TR64012|c0_g1_i1	0.07	0.31	10.34	0.11	0	0	0.39	protein	gi|359488216|ref|XP_003633721.1|PREDICTED: uncharacterized protein LOC100852994 [Vitis vinifera]
TR59150|c2_g1_i1	23.55	20.52	5.04	0.75	1.42	1.05	3.04	sugar transporter erd6-like 5-like	gi|359487982|ref|XP_002263320.2|PREDICTED: sugar transporter ERD6-like 5-like [Vitis vinifera]
TR67749|c0_g1_i3	4.79	3.51	2.44	2.28	2.15	8.15	3.78	erd6-like transporter	gi|359487977|ref|XP_002263553.2|PREDICTED: sugar transporter ERD6-like 5-like [Vitis vinifera]
TR52352|c0_g1_i3	10.47	3.85	9.98	7.78	10.43	7.02	5.91	flap endonuclease 1a	gi|359487708|ref|XP_002278964.2|PREDICTED: flap endonuclease 1-like [Vitis vinifera]
TR63213|c0_g1_i1	3.56	3.32	4.5	4.97	4.52	5.56	2.53	translation initiation factor if-2	gi|359487636|ref|XP_002279490.2|PREDICTED: translation initiation factor IF-2-like [Vitis vinifera] gi|296089697|emb|CBI39516.3| unnamed protein product [Vitis vinifera]
TR63213|c0_g1_i2	3.66	3	4.16	5.44	3.72	6.14	2.11	translation initiation factor if-2	gi|359487636|ref|XP_002279490.2|PREDICTED: translation initiation factor IF-2-like [Vitis vinifera] gi|296089697|emb|CBI39516.3| unnamed protein product [Vitis vinifera]
TR63213|c0_g1_i3	3.63	2.62	4.13	4.76	4.32	6.16	2.2	translation initiation factor if-2	gi|359487636|ref|XP_002279490.2|PREDICTED: translation initiation factor IF-2-like [Vitis vinifera] gi|296089697|emb|CBI39516.3| unnamed protein product [Vitis vinifera]
TR63213|c0_g1_i4	3.34	3.17	2.82	4.76	4.24	5.79	2.28	translation initiation factor if-2	gi|359487636|ref|XP_002279490.2|PREDICTED: translation initiation factor IF-2-like [Vitis vinifera] gi|296089697|emb|CBI39516.3| unnamed protein product [Vitis vinifera]
Mj_1_GCCAAT_L005_R1_001_(paired)_trimmed_(paired)_contig_12612	2.85	2.72	2.75	3.09	5.05	4.76	3.84	protein	gi|359487460|ref|XP_002273408.2|PREDICTED: uncharacterized protein LOC100263217 [Vitis vinifera]
TR68068|c1_g3_i1	3.73	3.35	4.52	3.14	6.58	3.91	3.03	hop-interacting protein thi115	gi|359487460|ref|XP_002273408.2|PREDICTED: uncharacterized protein LOC100263217 [Vitis vinifera]
Mj_1_GCCAAT_L005_R1_001_(paired)_trimmed_(paired)_contig_7690	3.25	2.58	6.6	5.06	4.47	5.73	6.18	probable carboxylesterase 18-like	gi|359487356|ref|XP_003633575.1|PREDICTED: uncharacterized protein LOC100855398 [Vitis vinifera]
Mj_1_GCCAAT_L005_R1_001_(paired)_trimmed_(paired)_contig_5619	24.08	18.7	41.95	68.35	68.9	65.2	39.04	translation initiation factor eif-2b beta subunit	gi|359487218|ref|XP_002272876.2|PREDICTED: translation initiation factor eIF-2B subunit beta-like isoform 1 [Vitis vinifera] gi|359487220|ref|XP_003633538.1| PREDICTED: translation initiation factor eIF-2B subunit beta-like isoform 2 [Vitis vinifera] gi|297742689|emb|CBI35142.3| unnamed protein product [Vitis vinifera]
TR65227|c0_g1_i1	8.33	1.65	2.91	4.88	3.9	5.79	2.97	dna gyrase subunit a	gi|359487079|ref|XP_002271674.2|PREDICTED: DNA gyrase subunit A, chloroplastic/mitochondrial-like [Vitis vinifera]
TR65227|c0_g1_i2	8.59	1.51	2.94	4.13	4.15	6.29	3.63	dna gyrase subunit a	gi|359487079|ref|XP_002271674.2|PREDICTED: DNA gyrase subunit A, chloroplastic/mitochondrial-like [Vitis vinifera]
TR77268|c0_g1_i2	15.72	13.34	4.47	4.7	5.68	6.49	4.71	protein	gi|359487063|ref|XP_002270806.2|PREDICTED: valyl-tRNA synthetase-like [Vitis vinifera]
TR68055|c1_g1_i1	5.33	5.08	5.67	2.01	5.51	4.37	5.63	armadillo beta-catenin-like repeat-containing protein	gi|359486357|ref|XP_002274126.2|PREDICTED: uncharacterized protein LOC100243287 [Vitis vinifera] gi|297736530|emb|CBI25401.3| unnamed protein product [Vitis vinifera]
TR74645|c1_g6_i1	5.31	5.37	11.77	11.16	11.44	12.66	11.86	atp binding	gi|359486325|ref|XP_003633430.1|PREDICTED: probable inactive serine/threonine-protein kinase scy1 [Vitis vinifera]
Mj_1_GCCAAT_L005_R1_001_(paired)_trimmed_(paired)_contig_7901	1.48	1.43	3.64	7.51	1.16	10.98	2.73	probable serine threonine-protein kinase at1g54610-like	gi|359486237|ref|XP_002264491.2|PREDICTED: probable serine/threonine-protein kinase At1g54610-like [Vitis vinifera] gi|297739502|emb|CBI29684.3| unnamed protein product [Vitis vinifera]
Mj_1_GCCAAT_L005_R1_001_(paired)_trimmed_(paired)_contig_118	1051.25	1506.75	412.37	26.08	45.82	31.9	425.19	light-harvesting complex ii protein lhcb2	gi|359485813|ref|XP_003633340.1|PREDICTED: pentatricopeptide repeat-containing protein At2g29760, chloroplastic-like [Vitis vinifera]
TR75771|c0_g1_i5	6.55	8.01	2.43	2.74	3.87	3.49	3.82	threonyl-trna synthetase	gi|359485807|ref|XP_002270988.2|PREDICTED: threonyl-tRNA synthetase-like [Vitis vinifera]
TR73788|c0_g4_i4	4.57	4.94	6.1	4.04	3.2	2.49	6.02	shaggy-related protein kinase iota	gi|359485302|ref|XP_002281788.2|PREDICTED: shaggy-related protein kinase zeta-like [Vitis vinifera]
TR71941|c0_g1_i2	4.69	2.95	5.35	6.26	6.21	5.92	3.81	serine threonine-protein phosphatase 5	gi|359485158|ref|XP_002280111.2|PREDICTED: serine/threonine-protein phosphatase 5-like [Vitis vinifera]
TR75145|c3_g2_i19	4.45	2.89	4.7	4.84	4.11	5.42	3	serine threonine-protein phosphatase 5	gi|359485158|ref|XP_002280111.2|PREDICTED: serine/threonine-protein phosphatase 5-like [Vitis vinifera]
scaffold10306	5.09	5.09	4.18	7.11	7.67	11.59	6.43	protein mei2-like 2-like	gi|359485142|ref|XP_002279792.2|PREDICTED: protein MEI2-like 2-like [Vitis vinifera]
scaffold10307	3.6	5.2	4.39	5.23	6.84	10.55	7.15	protein mei2-like 2-like	gi|359485142|ref|XP_002279792.2|PREDICTED: protein MEI2-like 2-like [Vitis vinifera]
TR65281|c0_g1_i1	8.76	9.63	13.93	8.11	9.64	11.33	9.49	villin 4	gi|359485106|ref|XP_002268471.2|PREDICTED: LOW QUALITY PROTEIN: villin-4 [Vitis vinifera]
TR65281|c0_g1_i3	8.44	8.74	13.26	8.33	8.22	10.23	9.65	villin 4	gi|359485106|ref|XP_002268471.2|PREDICTED: LOW QUALITY PROTEIN: villin-4 [Vitis vinifera]
TR66086|c0_g1_i4	6.11	5.74	7.66	5.96	5.42	6.75	6.47	villin 4	gi|359485106|ref|XP_002268471.2|PREDICTED: LOW QUALITY PROTEIN: villin-4 [Vitis vinifera]
Mj_1_GCCAAT_L005_R1_001_(paired)_trimmed_(paired)_contig_3794	36.89	64.84	17.68	1.4	1.85	0.49	14.92	serine	gi|359485100|ref|XP_002268642.2|PREDICTED: serine carboxypeptidase-like 18-like [Vitis vinifera]
TR66244|c0_g1_i1	46.73	88.27	21.87	1.47	1.75	0.89	15.33	serine carboxypeptidase-like 18-like	gi|359485100|ref|XP_002268642.2|PREDICTED: serine carboxypeptidase-like 18-like [Vitis vinifera]
TR70271|c0_g1_i6	1.73	4.38	3.08	1.25	4.25	1.29	10.76	cbl-interacting serine threonine-protein	gi|359485045|ref|XP_002277405.2|PREDICTED: CBL-interacting serine/threonine-protein kinase 21 [Vitis vinifera] gi|229609829|gb|ACQ83530.1| CBL-interacting protein kinase 14 [Vitis vinifera] gi|297735329|emb|CBI17769.3| unnamed protein product [Vitis vinifera]
Mj_1_GCCAAT_L005_R1_001_(paired)_trimmed_(paired)_contig_12954	4.38	3.17	4.63	3.05	5.75	4.14	5.33	general transcription factor iie subunit 1-like	gi|359484994|ref|XP_003633196.1|PREDICTED: general transcription factor IIE subunit 1-like [Vitis vinifera] gi|297735317|emb|CBI17757.3| unnamed protein product [Vitis vinifera]
Mj_1_GCCAAT_L005_R1_001_(paired)_trimmed_(paired)_contig_12955	3.5	2.55	4.25	4.1	4.33	8.03	5.19	general transcription factor iie subunit 1-like	gi|359484994|ref|XP_003633196.1|PREDICTED: general transcription factor IIE subunit 1-like [Vitis vinifera] gi|297735317|emb|CBI17757.3| unnamed protein product [Vitis vinifera]
TR71831|c1_g1_i3	3.56	2.4	4.39	2.01	3.28	3.14	6.24	general transcription factor iie subunit 1-like	gi|359484994|ref|XP_003633196.1|PREDICTED: general transcription factor IIE subunit 1-like [Vitis vinifera] gi|297735317|emb|CBI17757.3| unnamed protein product [Vitis vinifera]
TR72626|c1_g3_i2	3.59	1.55	2.92	3.81	3.21	5.34	3.8	general transcription factor iie subunit 1-like	gi|359484994|ref|XP_003633196.1|PREDICTED: general transcription factor IIE subunit 1-like [Vitis vinifera] gi|297735317|emb|CBI17757.3| unnamed protein product [Vitis vinifera]
TR72626|c1_g3_i3	4.93	2.61	3.87	3.92	3.97	5.59	5.86	general transcription factor iie subunit 1-like	gi|359484994|ref|XP_003633196.1|PREDICTED: general transcription factor IIE subunit 1-like [Vitis vinifera] gi|297735317|emb|CBI17757.3| unnamed protein product [Vitis vinifera]
TR72626|c1_g3_i7	4.48	2.19	2.84	3.38	5.14	6.38	4.25	general transcription factor iie subunit 1-like	gi|359484994|ref|XP_003633196.1|PREDICTED: general transcription factor IIE subunit 1-like [Vitis vinifera] gi|297735317|emb|CBI17757.3| unnamed protein product [Vitis vinifera]
scaffold13030	3.46	2.51	2.51	2.4	5.19	3.51	3.91	general transcription factor iie subunit 1-like	gi|359484994|ref|XP_003633196.1|PREDICTED: general transcription factor IIE subunit 1-like [Vitis vinifera] gi|297735317|emb|CBI17757.3| unnamed protein product [Vitis vinifera]
TR66993|c0_g1_i5	2.83	2.04	2.58	3.42	3.71	6.22	3.38	cyclic nucleotide gated channel	gi|359484957|ref|XP_002264416.2|PREDICTED: probable cyclic nucleotide-gated ion channel 17-like [Vitis vinifera]
TR73454|c2_g9_i1	4.24	4.26	8.22	5.83	5.49	6.5	5.76	sec34-like protein	gi|359484460|ref|XP_002273836.2|PREDICTED: conserved oligomeric Golgi complex subunit 3-like [Vitis vinifera] gi|297738499|emb|CBI27744.3| unnamed protein product [Vitis vinifera]
TR73454|c2_g9_i2	3.82	2.65	4.23	4.24	2.95	5.93	4.46	sec34-like protein	gi|359484460|ref|XP_002273836.2|PREDICTED: conserved oligomeric Golgi complex subunit 3-like [Vitis vinifera] gi|297738499|emb|CBI27744.3| unnamed protein product [Vitis vinifera]
TR51924|c0_g1_i2	53.67	29.04	96.13	47.47	71.57	52.53	44.36	40s ribosomal protein s29	gi|359484283|ref|XP_003633092.1|PREDICTED: 40S ribosomal protein S29-like isoform 2 [Vitis vinifera] gi|297738544|emb|CBI27789.3| unnamed protein product [Vitis vinifera]
TR52324|c0_g1_i1	62.49	35.57	108.01	58.18	84.49	54.85	50.76	40s ribosomal protein s29	gi|359484283|ref|XP_003633092.1|PREDICTED: 40S ribosomal protein S29-like isoform 2 [Vitis vinifera] gi|297738544|emb|CBI27789.3| unnamed protein product [Vitis vinifera]
TR72813|c0_g1_i4	2.91	2.73	4.67	4.64	4.44	5.66	3.09	protein argonaute 2-like	gi|359484080|ref|XP_002274220.2|PREDICTED: protein argonaute 2-like [Vitis vinifera]
TR75765|c0_g1_i3	3.83	3.59	3.77	4.86	6.23	5.71	4.25	probable lysine-specific demethylase jmj14-like	gi|359483996|ref|XP_002271515.2|PREDICTED: probable lysine-specific demethylase JMJ14-like [Vitis vinifera]
TR78659|c0_g1_i1	15.4	4.78	12.84	5.2	5.35	5.27	9.79	air9 protein	gi|359483669|ref|XP_002274947.2|PREDICTED: uncharacterized protein LOC100253161 [Vitis vinifera] gi|297740810|emb|CBI30992.3| unnamed protein product [Vitis vinifera]
TR78726|c0_g3_i1	12.75	4.91	10.62	5.03	5	4.69	9.1	air9 protein	gi|359483669|ref|XP_002274947.2|PREDICTED: uncharacterized protein LOC100253161 [Vitis vinifera] gi|297740810|emb|CBI30992.3| unnamed protein product [Vitis vinifera]
TR78006|c0_g1_i2	6.07	3.32	3.83	2.35	4.19	0.64	6.27	glycogen phosphorylase 1	gi|359483492|ref|XP_002273615.2|PREDICTED: glycogen phosphorylase 1-like [Vitis vinifera]
TR48256|c0_g1_i1	7.38	9.12	6.44	3.39	6.37	4.99	7.26	probable rhamnogalacturonate lyase b-like	gi|359483426|ref|XP_003632957.1|PREDICTED: probable rhamnogalacturonate lyase B-like [Vitis vinifera] gi|302144126|emb|CBI23231.3| unnamed protein product [Vitis vinifera]
TR72766|c0_g1_i3	28.85	25.12	34.47	41	30.82	29.78	40.42	pyrophosphate-energized membrane proton pump 2	gi|359483296|ref|XP_002265811.2|PREDICTED: pyrophosphate-energized membrane proton pump 3 [Vitis vinifera]
C936498	5.92	4.16	7.18	2.76	2.86	2.32	4.46	rossmann-fold nad -binding domain-containing protein	gi|359483167|ref|XP_002263272.2|PREDICTED: uncharacterized protein C1A6.10-like [Vitis vinifera] gi|298204697|emb|CBI25195.3| unnamed protein product [Vitis vinifera]
TR51220|c1_g1_i2	5.26	5.02	4.01	4.91	6.01	4.29	8.7	calcium-transporting atpase plasma membrane-type-like	gi|359483154|ref|XP_002275074.2|PREDICTED: calcium-transporting ATPase 9, plasma membrane-type-like [Vitis vinifera]
TR51220|c1_g1_i5	2.29	2.27	3.93	3.49	2.86	2.87	6.31	ca2+-transporting atpase	gi|359483154|ref|XP_002275074.2|PREDICTED: calcium-transporting ATPase 9, plasma membrane-type-like [Vitis vinifera]
TR51220|c1_g1_i6	4.24	3.17	3.24	3.46	1.2	2.55	7.47	ca2+-transporting atpase	gi|359483154|ref|XP_002275074.2|PREDICTED: calcium-transporting ATPase 9, plasma membrane-type-like [Vitis vinifera]
TR72803|c1_g1_i2	5.49	3.61	7.04	4.27	6.58	9.63	5.54	dna repair protein rad23-1-like	gi|359483130|ref|XP_002270323.2|PREDICTED: putative DNA repair protein RAD23-1-like [Vitis vinifera]
Mj_1_GCCAAT_L005_R1_001_(paired)_trimmed_(paired)_contig_13502	10.82	7.06	8.29	15.52	16.93	21.52	13.71	nucleosome assembly	gi|359482848|ref|XP_002280211.2|PREDICTED: nucleosome assembly protein 1-like 1-like isoform 1 [Vitis vinifera] gi|297743095|emb|CBI35962.3| unnamed protein product [Vitis vinifera]
Mj_1_GCCAAT_L005_R1_001_(paired)_trimmed_(paired)_contig_22489	1.5	2.16	2.91	4.72	10.31	9.38	6.46	quinone oxidoreductase 1	gi|359482805|ref|XP_002271007.2|PREDICTED: quinone oxidoreductase 1 [Vitis vinifera]
Mj_1_GCCAAT_L005_R1_001_(paired)_trimmed_(paired)_contig_1284	16.64	21.82	3.74	2.48	1.97	3.41	8.07	tetratricopeptide-like helical domain-containing protein	gi|359482723|ref|XP_003632816.1|PREDICTED: protein KIAA0664 homolog [Vitis vinifera]
TR78239|c3_g1_i4	29.74	37.02	9.26	3.27	3.95	5.09	13.86	tetratricopeptide-like helical domain-containing protein	gi|359482723|ref|XP_003632816.1|PREDICTED: protein KIAA0664 homolog [Vitis vinifera]
TR73492|c0_g1_i3	21.79	1.58	16.25	0.82	0.71	0.4	4.89	protein	gi|359482658|ref|XP_002285224.2|PREDICTED: uncharacterized protein LOC100251511 [Vitis vinifera]
TR69854|c0_g1_i2	34.48	36.13	31.04	59.28	41.04	40.31	34.52	alanine aminotransferase	gi|359482440|ref|XP_002265294.2|PREDICTED: alanine aminotransferase 2 [Vitis vinifera]
TR58626|c0_g1_i3	5.06	4.58	2.45	1.03	0.78	0	3.2	pyruvate cytosolic isozyme-like	gi|359482228|ref|XP_003632737.1|PREDICTED: pyruvate kinase, cytosolic isozyme-like [Vitis vinifera] gi|297739915|emb|CBI30097.3| unnamed protein product [Vitis vinifera]
TR79449|c0_g1_i2	3.08	5.45	5.75	4.82	4.92	9.25	3.5	protein	gi|359481863|ref|XP_003632681.1|PREDICTED: uncharacterized protein LOC100257222 [Vitis vinifera]
TR69109|c0_g1_i1	13.9	49.77	33.33	8.37	4.02	6.13	21.72	peptidase s41 family protein	gi|359481833|ref|XP_002277512.2|PREDICTED: carboxyl-terminal-processing protease-like [Vitis vinifera]
TR69051|c1_g1_i2	3.83	2.09	2.53	3.34	7.64	8.01	3.99	poly-glutamine tract-binding protein	gi|359481578|ref|XP_002278437.2|PREDICTED: uncharacterized protein LOC100263596 [Vitis vinifera]
TR77742|c0_g2_i4	2.23	2.01	2.89	3.47	2.94	5.31	2.63	nt domain of poly polymerase and terminal uridylyl transferase-containing protein	gi|359481238|ref|XP_002266958.2|PREDICTED: uncharacterized protein LOC100258499 [Vitis vinifera]
TR68692|c0_g5_i2	45.42	29.67	4.46	0.38	0	0.39	72.26	transcription factor	gi|359481063|ref|XP_002263154.2|PREDICTED: putative axial regulator YABBY 2-like [Vitis vinifera] gi|296089363|emb|CBI39135.3| unnamed protein product [Vitis vinifera]
TR65450|c0_g1_i1	9.54	4.71	2.17	1.6	1.82	1.18	1.56	cysteine synthase	gi|359480989|ref|XP_002271966.2|PREDICTED: probable cysteine synthase, chloroplastic-like [Vitis vinifera] gi|296085861|emb|CBI31185.3| unnamed protein product [Vitis vinifera]
TR65450|c0_g1_i2	10.33	3.01	2.35	2.1	2.71	2.07	1.97	cysteine synthase	gi|359480989|ref|XP_002271966.2|PREDICTED: probable cysteine synthase, chloroplastic-like [Vitis vinifera] gi|296085861|emb|CBI31185.3| unnamed protein product [Vitis vinifera]
TR65450|c0_g1_i4	9.32	3.8	2.03	1.73	2.15	2.09	2.05	cysteine synthase	gi|359480989|ref|XP_002271966.2|PREDICTED: probable cysteine synthase, chloroplastic-like [Vitis vinifera] gi|296085861|emb|CBI31185.3| unnamed protein product [Vitis vinifera]
TR54199|c0_g1_i2	10.22	5.6	28.25	2.49	2.06	1.46	3.53	beta-galactosidase 3-like	gi|359480881|ref|XP_003632537.1|PREDICTED: beta-galactosidase 3-like [Vitis vinifera] gi|296082595|emb|CBI21600.3| unnamed protein product [Vitis vinifera]
TR68787|c0_g2_i1	11.97	15.67	2.8	1.54	3.38	1.15	7.31	aldehyde dehydrogenase family 3 member h1	gi|359480760|ref|XP_002273730.2|PREDICTED: aldehyde dehydrogenase family 3 member I1, chloroplastic-like [Vitis vinifera]
Mj_1_GCCAAT_L005_R1_001_(paired)_trimmed_(paired)_contig_21319	0.76	0.41	2.19	39.59	48.45	28.37	13.01	heat shock transcription factor hsf4	gi|359480674|ref|XP_002277765.2|PREDICTED: heat shock factor protein HSF24-like [Vitis vinifera] gi|296082424|emb|CBI21429.3| unnamed protein product [Vitis vinifera]
TR68963|c0_g1_i1	1.03	0.71	2.77	50.95	69.7	37.99	14.18	heat shock transcription factor hsf4	gi|359480674|ref|XP_002277765.2|PREDICTED: heat shock factor protein HSF24-like [Vitis vinifera] gi|296082424|emb|CBI21429.3| unnamed protein product [Vitis vinifera]
Mj_1_GCCAAT_L005_R1_001_(paired)_trimmed_(paired)_contig_16748	0.86	0.83	10.79	8.14	4.25	5.05	12.38	hydroxyproline-rich glycoprotein	gi|359480520|ref|XP_003632481.1|PREDICTED: uncharacterized protein At5g65660-like [Vitis vinifera] gi|297735867|emb|CBI18621.3| unnamed protein product [Vitis vinifera]
Mj_1_GCCAAT_L005_R1_001_(paired)_trimmed_(paired)_contig_6009	2.64	3.12	5.01	3.43	5.88	5.73	4.98	lmbr1 domain-containing protein 2 homolog a-like	gi|359480489|ref|XP_002264408.2|PREDICTED: LMBR1 domain-containing protein 2 homolog A-like [Vitis vinifera] gi|297741834|emb|CBI33147.3| unnamed protein product [Vitis vinifera]
TR55480|c0_g1_i1	3.89	5.99	18.21	0	0	0.09	1.96	protein	gi|359479965|ref|XP_003632380.1|PREDICTED: LOW QUALITY PROTEIN: probable pectinesterase 53-like [Vitis vinifera]
TR74247|c0_g1_i1	15.08	6.95	9.61	8.44	10.33	10.42	12.41	sister-chromatide cohesion protein	gi|359479838|ref|XP_002270509.2|PREDICTED: cohesin subunit SA-1-like [Vitis vinifera]
TR71349|c2_g2_i2	4.37	3.31	3.64	2.02	1.9	1.82	6.1	centromere protein	gi|359479667|ref|XP_003632326.1|PREDICTED: uncharacterized protein LOC100852899 [Vitis vinifera]
TR68542|c1_g2_i7	4.74	6.29	1.02	0.23	0.54	0.32	0.5	aryl-alcohol dehydrogenase -like	gi|359479534|ref|XP_003632286.1|PREDICTED: putative aryl-alcohol dehydrogenase C977.14c isoform 2 [Vitis vinifera]
TR74292|c0_g1_i2	8.28	3.44	4.83	5.63	4.71	6.54	7.07	nuclear cap-binding protein	gi|359479295|ref|XP_003632252.1|PREDICTED: nuclear cap-binding protein subunit 1-like isoform 2 [Vitis vinifera] gi|296083820|emb|CBI24208.3| unnamed protein product [Vitis vinifera]
TR51339|c1_g1_i1	36.58	44.63	140.18	183.72	197.09	130.42	63.77	calmodulin	gi|359479174|ref|XP_003632230.1|PREDICTED: calmodulin-related protein isoform 4 [Vitis vinifera]
TR73788|c0_g3_i3	5.72	1.55	1.25	0.89	1.69	1.69	1.28	chloroplast biogenesis partial	gi|359479098|ref|XP_002274209.2|PREDICTED: pentatricopeptide repeat-containing protein At1g05750, chloroplastic-like [Vitis vinifera]
Mj_1_GCCAAT_L005_R1_001_(paired)_trimmed_(paired)_contig_19121	15.5	14.57	34.31	18.61	20.79	14.11	18.83	pdi-like 5-1	gi|359479048|ref|XP_002264005.2|PREDICTED: protein disulfide-isomerase 5-1 [Vitis vinifera]
Mj_1_GCCAAT_L005_R1_001_(paired)_trimmed_(paired)_contig_16453	2.17	1.06	1.93	0.21	1.58	0.07	6.04	probable leucine-rich repeat receptor-like protein kinase at4g00330-like	gi|359478876|ref|XP_002280660.2|PREDICTED: probable leucine-rich repeat receptor-like protein kinase At4g00330-like [Vitis vinifera] gi|297745952|emb|CBI16008.3| unnamed protein product [Vitis vinifera]
TR71303|c1_g1_i2	2.36	1	1.47	0.52	1.48	0	5.5	probable leucine-rich repeat receptor-like protein kinase at4g00330-like	gi|359478876|ref|XP_002280660.2|PREDICTED: probable leucine-rich repeat receptor-like protein kinase At4g00330-like [Vitis vinifera] gi|297745952|emb|CBI16008.3| unnamed protein product [Vitis vinifera]
TR75826|c0_g1_i1	2.75	3.76	3.33	2.6	8.24	1.72	5.93	cytochrome p450	gi|359478809|ref|XP_003632173.1|PREDICTED: LOW QUALITY PROTEIN: cytochrome P450 716B2-like [Vitis vinifera]
TR73328|c0_g1_i2	8.1	7.88	10.56	10.08	8.4	15.09	8.96	rna recognition motif-containing protein	gi|359478673|ref|XP_002281895.2|PREDICTED: uncharacterized protein LOC100267264 [Vitis vinifera]
TR46618|c0_g1_i1	1.29	2.73	7.01	5.32	3.46	2.57	3.56	protein	gi|359478531|ref|XP_003632128.1|PREDICTED: uncharacterized protein LOC100251809 isoform 2 [Vitis vinifera]
TR70678|c1_g1_i2	2.11	2.14	4.65	3.97	3.35	2.63	5.32	tbp-associated factor 7	gi|359478454|ref|XP_002285704.2|PREDICTED: transcription initiation factor TFIID subunit 7-like [Vitis vinifera]
TR69649|c0_g1_i4	5.45	3.14	3.11	2.9	2.73	2.15	3.43	5 -3 exonuclease-like protein	gi|359478321|ref|XP_002275974.2|PREDICTED: DNA polymerase I-like [Vitis vinifera] gi|296084279|emb|CBI24667.3| unnamed protein product [Vitis vinifera]
TR73563|c1_g2_i2	31.64	63.94	9.34	1.42	2.98	1.49	13.58	protein	gi|359478275|ref|XP_002274820.2|PREDICTED: uncharacterized protein LOC100249037 [Vitis vinifera] gi|296084312|emb|CBI24700.3| unnamed protein product [Vitis vinifera]
TR73563|c1_g2_i4	20.68	43.96	7.01	1.86	2.49	1.23	8.31	protein	gi|359478275|ref|XP_002274820.2|PREDICTED: uncharacterized protein LOC100249037 [Vitis vinifera] gi|296084312|emb|CBI24700.3| unnamed protein product [Vitis vinifera]
TR74075|c0_g3_i6	15.72	33.31	5.22	1.09	1.11	0.65	6.67	protein	gi|359478275|ref|XP_002274820.2|PREDICTED: uncharacterized protein LOC100249037 [Vitis vinifera] gi|296084312|emb|CBI24700.3| unnamed protein product [Vitis vinifera]
TR71398|c0_g2_i2	16.18	13.51	2.76	0.53	0.67	0	2.75	probable fkbp-type peptidyl-prolyl cis-trans isomerase chloroplastic-like	gi|359478215|ref|XP_002274062.2|PREDICTED: probable FKBP-type peptidyl-prolyl cis-trans isomerase 2, chloroplastic-like [Vitis vinifera] gi|296084250|emb|CBI24638.3| unnamed protein product [Vitis vinifera]
TR63359|c1_g1_i1	2.26	0.65	1.59	5.36	2.69	5.74	1.33	er lumen protein retaining receptor	gi|359477883|ref|XP_002266203.2|PREDICTED: ER lumen protein retaining receptor-like [Vitis vinifera]
TR63359|c1_g2_i3	10.22	9.74	18.88	10.3	9.55	10.63	11.6	er lumen protein retaining receptor-like	gi|359477883|ref|XP_002266203.2|PREDICTED: ER lumen protein retaining receptor-like [Vitis vinifera]
TR63359|c2_g1_i2	13.48	13.42	23.16	15.89	12.88	11.23	12.33	er lumen protein retaining receptor-like	gi|359477883|ref|XP_002266203.2|PREDICTED: ER lumen protein retaining receptor-like [Vitis vinifera]
TR63359|c2_g1_i6	9.92	7.51	17.19	7.23	9.65	8.57	9.25	er lumen protein retaining receptor-like	gi|359477883|ref|XP_002266203.2|PREDICTED: ER lumen protein retaining receptor-like [Vitis vinifera]
TR69528|c1_g1_i1	3.46	3.6	3.73	0.91	0.43	2.22	7.64	casp-like protein at3g23200-like	gi|359477783|ref|XP_003632021.1|PREDICTED: CASP-like protein At3g23200 [Vitis vinifera]
Mj_1_GCCAAT_L005_R1_001_(paired)_trimmed_(paired)_contig_16498	2.23	0.84	1.31	2.14	3.35	5.06	1.41	pentatricopeptide repeat-containing protein	gi|359477774|ref|XP_002282129.2|PREDICTED: pentatricopeptide repeat-containing protein At4g02750-like [Vitis vinifera]
TR78513|c0_g1_i3	0.76	1.06	1.61	3.71	5.94	5.26	4.31	protein	gi|359477643|ref|XP_002266393.2|PREDICTED: pleiotropic drug resistance protein 3-like [Vitis vinifera]
TR78929|c0_g3_i1	0.94	0.84	1.56	2.69	5.02	3.93	3.44	pleiotropic drug resistance protein 3-like	gi|359477643|ref|XP_002266393.2|PREDICTED: pleiotropic drug resistance protein 3-like [Vitis vinifera]
TR78929|c0_g3_i4	1.21	0.9	1.81	3.44	5.15	4.44	3.46	pleiotropic drug resistance protein 3-like	gi|359477643|ref|XP_002266393.2|PREDICTED: pleiotropic drug resistance protein 3-like [Vitis vinifera]
TR79730|c2_g1_i1	16.31	5.88	7.37	3.37	2.91	4.22	12.89	stomatin-like protein	gi|359477310|ref|XP_003631962.1|PREDICTED: uncharacterized protein LOC100855226 [Vitis vinifera]
TR79730|c2_g1_i3	15.77	5.39	5.5	2.42	1.96	3.27	12.02	retroelement polyprotein	gi|359477310|ref|XP_003631962.1|PREDICTED: uncharacterized protein LOC100855226 [Vitis vinifera]
TR51518|c0_g1_i1	1.17	8.41	0	0	0	0	0.07	bahd family clade v	gi|359477285|ref|XP_003631959.1|PREDICTED: LOW QUALITY PROTEIN: omega-hydroxypalmitate O-feruloyl transferase-like [Vitis vinifera]
TR65339|c0_g1_i4	4.98	4.12	4.69	3.68	4.71	4.23	7.03	calmodulin-binding transcription activator	gi|359477127|ref|XP_002272118.2|PREDICTED: calmodulin-binding transcription activator 5-like [Vitis vinifera] gi|296083270|emb|CBI22906.3| unnamed protein product [Vitis vinifera]
TR77687|c0_g2_i1	2.47	3	3.02	1.99	2.77	0.12	9.37	kinase-like protein	gi|359477048|ref|XP_002275811.2|PREDICTED: G-type lectin S-receptor-like serine/threonine-protein kinase RLK1-like [Vitis vinifera]
TR63767|c2_g1_i5	15.32	10.77	13.06	13.24	15.88	17.26	18.85	splicing factor u2af large subunit b	gi|359476715|ref|XP_002271463.2|PREDICTED: splicing factor U2af large subunit B-like [Vitis vinifera]
TR77781|c1_g1_i6	18.42	13.5	12.28	13.79	15.3	20.28	19.07	splicing factor u2af large subunit b	gi|359476715|ref|XP_002271463.2|PREDICTED: splicing factor U2af large subunit B-like [Vitis vinifera]
TR70220|c1_g1_i1	3.26	4.59	16.14	6.89	9.73	7.7	9.85	protein	gi|359476700|ref|XP_002266907.2|PREDICTED: CRAL-TRIO domain-containing protein C23B6.04c [Vitis vinifera]
Mj_1_GCCAAT_L005_R1_001_(paired)_trimmed_(paired)_contig_13014	23.98	13.78	32.88	21.64	29.97	31.79	15.32	PREDICTED: uncharacterized protein LOC100854904	gi|359476364|ref|XP_003631825.1|PREDICTED: uncharacterized protein LOC100854904 [Vitis vinifera] gi|296081875|emb|CBI20880.3| unnamed protein product [Vitis vinifera]
TR67990|c0_g1_i2	6.54	2.22	3.34	2.99	1.52	9.84	4.41	zinc finger protein nutcracker-like	gi|359475946|ref|XP_002278933.2|PREDICTED: zinc finger protein NUTCRACKER-like [Vitis vinifera]
TR70348|c0_g1_i1	2.89	2.93	3.41	2.46	2.93	5.31	3.58	casein kinase	gi|359475913|ref|XP_002272679.2|PREDICTED: uncharacterized protein LOC100254265 [Vitis vinifera]
TR70348|c0_g1_i2	3.68	3.12	3.78	3.54	3.04	5.78	4.33	casein kinase	gi|359475913|ref|XP_002272679.2|PREDICTED: uncharacterized protein LOC100254265 [Vitis vinifera]
TR78496|c0_g1_i2	8.12	8.33	8.02	11.81	9.66	18.76	10.09	cgs1 mrna stability	gi|359475831|ref|XP_002282789.2|PREDICTED: uncharacterized protein LOC100259525 [Vitis vinifera] gi|296082057|emb|CBI21062.3| unnamed protein product [Vitis vinifera]
TR62209|c0_g1_i6	7.52	6.11	5.39	5.86	6.41	6.79	7.52	peptidylprolyl isomerase	gi|359475799|ref|XP_002285000.2|PREDICTED: uncharacterized protein LOC100264514 [Vitis vinifera]
Mj_1_GCCAAT_L005_R1_001_(paired)_trimmed_(paired)_contig_28440	1.18	1.31	10.14	9.74	10.86	12.83	9.68	cytochrome p450 76c4	gi|359475605|ref|XP_002263073.2|PREDICTED: LOW QUALITY PROTEIN: 7-ethoxycoumarin O-deethylase-like [Vitis vinifera]
TR77725|c0_g1_i5	1.89	5.39	10.82	0.37	1.59	0.66	4.3	serine carboxypeptidase-like 18-like	gi|359475474|ref|XP_002266354.2|PREDICTED: serine carboxypeptidase-like 18-like [Vitis vinifera]
Mj_1_GCCAAT_L005_R1_001_(paired)_trimmed_(paired)_contig_28041	12.16	9.5	22.2	11.17	14.39	8.43	16.09	protein unc-50 homolog	gi|359475413|ref|XP_002282581.2|PREDICTED: protein unc-50 homolog [Vitis vinifera]
TR48702|c0_g1_i2	7.35	3.83	5.98	5.09	7.2	8.46	6.2	50s ribosomal protein l27	gi|359475326|ref|XP_003631656.1|PREDICTED: 50S ribosomal protein L27-like [Vitis vinifera]
scaffold11865	13.74	11.61	9.36	12.41	12.4	23.92	7.93	serine threonine-protein kinase	gi|359475220|ref|XP_003631616.1|PREDICTED: serine/threonine-protein kinase SAPK10 isoform 2 [Vitis vinifera]
TR56805|c0_g1_i1	35.83	35.14	50.64	59	72.89	61.13	50.26	coiled-coil domain-containing protein	gi|359474801|ref|XP_002279494.2|PREDICTED: coiled-coil domain-containing protein 124-A-like [Vitis vinifera]
scaffold14200	10.57	13.06	16.87	21.63	29.17	25.85	19.73	coiled-coil domain-containing protein	gi|359474801|ref|XP_002279494.2|PREDICTED: coiled-coil domain-containing protein 124-A-like [Vitis vinifera]
TR66889|c0_g1_i5	0.48	1.6	1.4	1.13	6.02	1.84	1.64	histidine triad family protein	gi|359474401|ref|XP_002266460.2|PREDICTED: histidine triad nucleotide-binding protein 3-like [Vitis vinifera]
TR79763|c1_g1_i4	5.03	5.48	9.44	7.23	7.89	7.86	5.55	haloacid dehalogenase-like hydrolase domain-containing protein	gi|359474381|ref|XP_003631447.1|PREDICTED: trehalose-phosphate phosphatase-like [Vitis vinifera]
TR47269|c0_g1_i1	1.22	0.95	2.09	0.71	1.17	0.62	7.03	24 kda seed maturation protein	gi|359474299|ref|XP_002277080.2|PREDICTED: uncharacterized protein LOC100267262 [Vitis vinifera]
TR76220|c1_g2_i1	5.9	12.19	6.26	4.66	3.07	3.9	21.45	protein	gi|359474041|ref|XP_003631392.1|PREDICTED: LOW QUALITY PROTEIN: (+)-neomenthol dehydrogenase-like [Vitis vinifera]
TR63680|c0_g1_i1	9.68	12.2	11.33	10.86	11.95	1.16	2.1	heparan-alpha-glucosaminide n-acetyltransferase-like	gi|359473865|ref|XP_002275105.2|PREDICTED: heparan-alpha-glucosaminide N-acetyltransferase-like [Vitis vinifera] gi|296085565|emb|CBI29297.3| unnamed protein product [Vitis vinifera]
TR70333|c2_g1_i2	0.67	0.49	2.62	16.49	0	39.04	1.18	protein	gi|359473541|ref|XP_002268359.2|PREDICTED: transcription factor bHLH111 [Vitis vinifera] gi|297738310|emb|CBI27511.3| unnamed protein product [Vitis vinifera]
TR48502|c0_g1_i2	15.6	24.48	4	1.18	3.5	1.3	9.43	protein	gi|359473495|ref|XP_002269529.2|PREDICTED: uncharacterized protein LOC100253004 [Vitis vinifera]
TR73379|c0_g1_i4	6.32	2.35	0.88	0.34	0	0	1.27	2-phytyl- -naphtoquinone chloroplastic-like	gi|359473246|ref|XP_002269864.2|PREDICTED: 2-phytyl-1,4-naphtoquinone methyltransferase, chloroplastic-like [Vitis vinifera] gi|297739088|emb|CBI28577.3| unnamed protein product [Vitis vinifera]
scaffold12219	1.45	1.25	3.94	7.27	6.73	6.74	1.71	histidine kinase 4-like	gi|359473065|ref|XP_002285117.2|PREDICTED: histidine kinase 4-like [Vitis vinifera]
TR64950|c0_g1_i3	2.16	1.28	2.63	1.31	5.15	1.25	2.06	tetratricopeptide repeat protein 5-like	gi|359472891|ref|XP_002280284.2|PREDICTED: tetratricopeptide repeat protein 5 isoform 1 [Vitis vinifera]
TR76752|c0_g3_i1	6.13	4.95	5.69	4.48	5.32	5.51	5.25	protein	gi|359472780|ref|XP_002275485.2|PREDICTED: probable RNA-binding protein 19-like [Vitis vinifera]
Mj_1_GCCAAT_L005_R1_001_(paired)_trimmed_(paired)_contig_13061	2.73	5.73	1.98	4.24	4.95	1.41	2.7	#NAME?	gi|359472684|ref|XP_003631185.1|PREDICTED: CRAL-TRIO domain-containing protein YKL091C-like [Vitis vinifera]
TR54354|c0_g1_i2	1.91	5.12	2.47	3.63	7.13	1.48	3.39	#NAME?	gi|359472684|ref|XP_003631185.1|PREDICTED: CRAL-TRIO domain-containing protein YKL091C-like [Vitis vinifera]
TR66656|c0_g1_i1	0.9	1.94	0	0	0.34	0	39.07	agamous-like protein partial	gi|359472558|ref|XP_002263410.2|PREDICTED: MADS-box protein CMB1 isoform 1 [Vitis vinifera] gi|297738118|emb|CBI27319.3| unnamed protein product [Vitis vinifera]
scaffold11734	1.04	1.29	0	0	0	0	34.35	mads-box protein cmb1 isoform 1	gi|359472558|ref|XP_002263410.2|PREDICTED: MADS-box protein CMB1 isoform 1 [Vitis vinifera] gi|297738118|emb|CBI27319.3| unnamed protein product [Vitis vinifera]
Mj_1_GCCAAT_L005_R1_001_(paired)_trimmed_(paired)_contig_25887	5.69	2.17	3.35	7.11	7.8	10.05	4.89	repressor of rna polymerase iii transcription maf1-like protein	gi|359386138|gb|AEV43358.1|MAF1-like protein [Citrus sinensis]
TR25764|c0_g1_i1	0	0	0	0.11	11.32	0	0	glycoside hydrolase family 7 protein	gi|359385376|emb|CCA94938.1|putative glycoside hydrolase family 7 [uncultured eukaryote]
TR25353|c0_g1_i1	0	0.29	0	0	0	0	6.18	hypothetical protein TRIATDRAFT_255346	gi|358399225|gb|EHK48568.1|hypothetical protein TRIATDRAFT_255346 [Trichoderma atroviride IMI 206040]
Mj_1_GCCAAT_L005_R1_001_(paired)_trimmed_(paired)_contig_74149	0	0	0	0	9.55	0	0	histone h2b	gi|358385634|gb|EHK23230.1|hypothetical protein TRIVIDRAFT_92198 [Trichoderma virens Gv29-8]
C942700	0	0	0	3.38	5.23	0	0	mannitol dehydrogenase	gi|358373854|dbj|GAA90450.1|sorbitol/xylulose reductase [Aspergillus kawachii IFO 4308]
Mj_1_GCCAAT_L005_R1_001_(paired)_trimmed_(paired)_contig_8595	7.92	9.21	7.81	5.72	7.6	8.62	7.19	probable atp-dependent rna helicase dhx36-like	gi|358348435|ref|XP_003638252.1|ATP-dependent RNA helicase A-like protein, partial [Medicago truncatula] gi|355504187|gb|AES85390.1| ATP-dependent RNA helicase A-like protein, partial [Medicago truncatula]
Mj_1_GCCAAT_L005_R1_001_(paired)_trimmed_(paired)_contig_955	99.1	162.49	13.4	69.48	42.55	9.28	28.92	cell wall-associated hydrolase	gi|358346026|ref|XP_003637074.1|Cell wall-associated hydrolase, partial [Medicago truncatula] gi|355503009|gb|AES84212.1| Cell wall-associated hydrolase, partial [Medicago truncatula]
TR45307|c1_g3_i1	143.55	240.97	27.11	138.99	92.11	18.79	52.24	cell wall-associated hydrolase	gi|358346026|ref|XP_003637074.1|Cell wall-associated hydrolase, partial [Medicago truncatula] gi|355503009|gb|AES84212.1| Cell wall-associated hydrolase, partial [Medicago truncatula]
TR70456|c1_g2_i1	4.44	1.09	3.04	0	0.21	0.16	6.64	casp-like protein 6	gi|358248678|ref|NP_001239666.1|CASP-like protein 6 [Glycine max] gi|288559192|sp|C6TBD0.1|CSPL6_SOYBN RecName: Full=CASP-like protein 6 gi|255637615|gb|ACU19132.1| unknown [Glycine max]
TR74531|c0_g3_i2	7.45	4.78	9.41	5.12	4.12	4.98	7.2	protein	gi|358248676|ref|NP_001240177.1|uncharacterized protein LOC100805734 [Glycine max] gi|255634620|gb|ACU17672.1| unknown [Glycine max]
TR74531|c0_g3_i3	4.69	3.81	6.4	3.28	3.27	3.07	5.94	ring u-box domain-containing protein	gi|358248676|ref|NP_001240177.1|uncharacterized protein LOC100805734 [Glycine max] gi|255634620|gb|ACU17672.1| unknown [Glycine max]
TR53571|c0_g1_i6	1.58	1.73	2.65	2.14	1.68	2.24	7.76	actin depolymerizing factor 6	gi|358248624|ref|NP_001239657.1|uncharacterized protein LOC100819975 [Glycine max] gi|255638235|gb|ACU19431.1| unknown [Glycine max]
TR64027|c0_g1_i1	13.6	11.28	9.04	4.42	8.24	5.63	8.6	fructokinase 3	gi|358248484|ref|NP_001240145.1|uncharacterized protein LOC100797023 [Glycine max] gi|255641428|gb|ACU20990.1| unknown [Glycine max]
TR64027|c0_g1_i3	8.72	6.94	3.55	3.87	5.16	2.8	4.22	fructokinase 3	gi|358248484|ref|NP_001240145.1|uncharacterized protein LOC100797023 [Glycine max] gi|255641428|gb|ACU20990.1| unknown [Glycine max]
TR66881|c1_g1_i2	12.08	9.13	9	4.49	5.85	4.34	6.17	fructokinase 3	gi|358248484|ref|NP_001240145.1|uncharacterized protein LOC100797023 [Glycine max] gi|255641428|gb|ACU20990.1| unknown [Glycine max]
Mj_1_GCCAAT_L005_R1_001_(paired)_trimmed_(paired)_contig_9948	7.46	6.92	10.85	13.99	13.38	11.12	10.47	mrna-decapping enzyme-like protein	gi|358248438|ref|NP_001239626.1|uncharacterized protein LOC100783361 [Glycine max] gi|255636473|gb|ACU18575.1| unknown [Glycine max] gi|255641041|gb|ACU20800.1| unknown [Glycine max]
Mj_1_GCCAAT_L005_R1_001_(paired)_trimmed_(paired)_contig_4930	84.8	97.47	235.45	97	83.38	47.66	103.65	glyceraldehyde-3-phosphate dehydrogenase	gi|358248010|ref|NP_001240046.1|uncharacterized protein LOC100782924 [Glycine max] gi|255647735|gb|ACU24328.1| unknown [Glycine max]
TR74846|c0_g1_i1	12.1	9.27	11.63	13.15	13.92	14.97	15.98	zinc finger protein	gi|357521469|ref|XP_003631023.1|Zinc finger protein [Medicago truncatula] gi|355525045|gb|AET05499.1| Zinc finger protein [Medicago truncatula]
TR74846|c0_g1_i2	13.35	10.75	13.11	14.1	15.54	18.38	16.69	zinc finger protein	gi|357521469|ref|XP_003631023.1|Zinc finger protein [Medicago truncatula] gi|355525045|gb|AET05499.1| Zinc finger protein [Medicago truncatula]
C951852	2.89	3.68	6.95	6.89	5.59	9.38	5.83	protein	gi|357520899|ref|XP_003630738.1|Protein phosphatase 1 regulatory subunit [Medicago truncatula] gi|355524760|gb|AET05214.1| Protein phosphatase 1 regulatory subunit [Medicago truncatula]
TR60306|c2_g1_i2	2.62	3.67	4.78	5.04	5.89	8.6	4.08	protein	gi|357520899|ref|XP_003630738.1|Protein phosphatase 1 regulatory subunit [Medicago truncatula] gi|355524760|gb|AET05214.1| Protein phosphatase 1 regulatory subunit [Medicago truncatula]
TR75813|c2_g1_i1	2.29	2.02	3.53	1.12	3.69	3.33	5.04	protein	gi|357520899|ref|XP_003630738.1|Protein phosphatase 1 regulatory subunit [Medicago truncatula] gi|355524760|gb|AET05214.1| Protein phosphatase 1 regulatory subunit [Medicago truncatula]
TR75813|c2_g1_i3	2.74	2.02	3.73	5.35	4.72	6.07	3.53	protein	gi|357520899|ref|XP_003630738.1|Protein phosphatase 1 regulatory subunit [Medicago truncatula] gi|355524760|gb|AET05214.1| Protein phosphatase 1 regulatory subunit [Medicago truncatula]
TR74303|c1_g1_i1	29.1	42.52	10.29	4.88	8.23	3.11	13.31	rossmann-fold nad -binding domain-containing protein	gi|357519077|ref|XP_003629827.1|UOS1 [Medicago truncatula] gi|355523849|gb|AET04303.1| UOS1 [Medicago truncatula]
TR53266|c0_g1_i2	3.24	1.72	1.48	0.72	0.95	5.82	2.05	zinc finger protein	gi|357513641|ref|XP_003627109.1|Zinc finger protein [Medicago truncatula] gi|355521131|gb|AET01585.1| Zinc finger protein [Medicago truncatula]
TR67990|c0_g1_i4	6.8	2.03	3.24	2.62	1.94	8.33	4.52	zinc finger protein	gi|357513641|ref|XP_003627109.1|Zinc finger protein [Medicago truncatula] gi|355521131|gb|AET01585.1| Zinc finger protein [Medicago truncatula]
TR53525|c0_g1_i2	16.98	18.64	18.87	17.12	18.35	19.61	17.28	protein	gi|357512497|ref|XP_003626537.1|Ubiquitin carrier protein [Medicago truncatula] gi|355501552|gb|AES82755.1| Ubiquitin carrier protein [Medicago truncatula]
TR63763|c0_g1_i1	47.75	41.08	91.77	92.49	114.5	91.78	83.48	protein	gi|357512495|ref|XP_003626536.1|Ubiquitin carrier protein [Medicago truncatula] gi|355501551|gb|AES82754.1| Ubiquitin carrier protein [Medicago truncatula]
Mj_1_GCCAAT_L005_R1_001_(paired)_trimmed_(paired)_contig_4842	120.71	52.38	157.93	109.61	145.28	113.97	111.33	60s ribosomal protein l23	gi|357510141|ref|XP_003625359.1|60S ribosomal protein L23 [Medicago truncatula] gi|355500374|gb|AES81577.1| 60S ribosomal protein L23 [Medicago truncatula]
TR47837|c0_g1_i1	259.11	127.47	332.11	249.64	334.03	270.47	249.73	60s ribosomal protein l23	gi|357510141|ref|XP_003625359.1|60S ribosomal protein L23 [Medicago truncatula] gi|355500374|gb|AES81577.1| 60S ribosomal protein L23 [Medicago truncatula]
TR61011|c0_g3_i5	1.84	1.17	1.92	4.53	6.4	7.92	1.41	ap2 domain-containing transcription factor	gi|357505625|ref|XP_003623101.1|Spikelet1-like AP2 transcription factor [Medicago truncatula] gi|355498116|gb|AES79319.1| Spikelet1-like AP2 transcription factor [Medicago truncatula]
C970332	6.7	6.37	9.35	7.37	6.71	4.62	8.56	protein	gi|357504853|ref|XP_003622715.1|hypothetical protein MTR_7g051210 [Medicago truncatula] gi|355497730|gb|AES78933.1| hypothetical protein MTR_7g051210 [Medicago truncatula]
Mj_1_GCCAAT_L005_R1_001_(paired)_trimmed_(paired)_contig_10438	3.99	5.13	9.09	3.18	5.4	4.45	7.23	protein	gi|357504853|ref|XP_003622715.1|hypothetical protein MTR_7g051210 [Medicago truncatula] gi|355497730|gb|AES78933.1| hypothetical protein MTR_7g051210 [Medicago truncatula]
TR47645|c0_g1_i2	7.02	6.29	9.84	9.19	8.97	5.97	9.07	protein	gi|357504853|ref|XP_003622715.1|hypothetical protein MTR_7g051210 [Medicago truncatula] gi|355497730|gb|AES78933.1| hypothetical protein MTR_7g051210 [Medicago truncatula]
TR58790|c2_g1_i1	6.6	4.96	8.42	5.53	7.51	4.42	6.66	protein	gi|357504853|ref|XP_003622715.1|hypothetical protein MTR_7g051210 [Medicago truncatula] gi|355497730|gb|AES78933.1| hypothetical protein MTR_7g051210 [Medicago truncatula]
Mj_1_GCCAAT_L005_R1_001_(paired)_trimmed_(paired)_contig_393	141.85	5.47	103.34	6.84	11.64	7.85	43.67	histone h3	gi|357502337|ref|XP_003621457.1|Histone H3 [Medicago truncatula] gi|355496472|gb|AES77675.1| Histone H3 [Medicago truncatula]
TR53792|c0_g1_i2	171.66	7.29	104.11	5.14	14.5	6.88	52.25	histone h3	gi|357502337|ref|XP_003621457.1|Histone H3 [Medicago truncatula] gi|355496472|gb|AES77675.1| Histone H3 [Medicago truncatula]
TR68167|c1_g1_i6	5.46	5.79	4.06	1.36	0.43	0.63	5.64	mrp-like protein	gi|357500511|ref|XP_003620544.1|Mrp-like protein [Medicago truncatula] gi|355495559|gb|AES76762.1| Mrp-like protein [Medicago truncatula]
TR62295|c4_g2_i5	386.31	349.59	533.56	499.3	277.46	165.69	518.03	ubiquitin-like protein	gi|357498827|ref|XP_003619702.1|Ubiquitin-like protein [Medicago truncatula] gi|355494717|gb|AES75920.1| Ubiquitin-like protein [Medicago truncatula]
TR69618|c2_g2_i3	3.37	3.41	4.43	5.65	7.98	3.95	5.66	crt homolog 1-like	gi|357493893|ref|XP_003617235.1|Crt-like protein [Medicago truncatula] gi|355518570|gb|AET00194.1| Crt-like protein [Medicago truncatula]
scaffold13668	4.4	3.58	7.05	4.31	4.21	4.1	4.35	probable dolichyl pyrophosphate glc1man9 c2 alpha- -glucosyltransferase-like	gi|357491875|ref|XP_003616225.1|Dolichyl pyrophosphate Glc1Man9GlcNAc2 alpha-1,3-glucosyltransferase [Medicago truncatula] gi|355517560|gb|AES99183.1| Dolichyl pyrophosphate Glc1Man9GlcNAc2 alpha-1,3-glucosyltransferase [Medicago truncatula]
Mj_1_GCCAAT_L005_R1_001_(paired)_trimmed_(paired)_contig_13246	7.87	0.92	0.08	0.1	0	0.22	0.38	ttf-type zinc finger protein with hat dimerisation domain	gi|357490617|ref|XP_003615596.1|Zinc finger MYM-type protein [Medicago truncatula] gi|355516931|gb|AES98554.1| Zinc finger MYM-type protein [Medicago truncatula]
Mj_1_GCCAAT_L005_R1_001_(paired)_trimmed_(paired)_contig_71551	0.98	0.7	2.88	9.67	13.1	8.91	0.72	xylan 1 4-beta-xylosidase	gi|357489437|ref|XP_003615006.1|Xylan 1 4-beta-xylosidase [Medicago truncatula] gi|355516341|gb|AES97964.1| Xylan 1 4-beta-xylosidase [Medicago truncatula]
TR48433|c10_g2_i1	515.6	816.92	878.35	8910.99	7946.43	2131.43	2355	rrna intron-encoded homing endonuclease	gi|357488191|ref|XP_003614383.1|hypothetical protein MTR_5g051000 [Medicago truncatula] gi|355515718|gb|AES97341.1| hypothetical protein MTR_5g051000 [Medicago truncatula]
TR76137|c0_g1_i1	11.16	8.83	8.41	6.75	5.43	9.08	9.43	rna-binding protein	gi|357485911|ref|XP_003613243.1|RNA-binding protein [Medicago truncatula] gi|355514578|gb|AES96201.1| RNA-binding protein [Medicago truncatula]
TR76137|c0_g1_i2	10	8.24	6.62	6.09	5.02	9.87	8.12	rna-binding protein	gi|357485911|ref|XP_003613243.1|RNA-binding protein [Medicago truncatula] gi|355514578|gb|AES96201.1| RNA-binding protein [Medicago truncatula]
TR76345|c0_g3_i8	11.59	9.82	10.14	7.27	6.91	12.38	11.02	rna-binding protein	gi|357485911|ref|XP_003613243.1|RNA-binding protein [Medicago truncatula] gi|355514578|gb|AES96201.1| RNA-binding protein [Medicago truncatula]
TR43930|c0_g1_i1	1.88	1.48	5.87	0.26	1.84	0.27	12.27	flavonol synthase flavanone 3-hydroxylase	gi|357485645|ref|XP_003613110.1|1-aminocyclopropane-1-carboxylate oxidase [Medicago truncatula] gi|355514445|gb|AES96068.1| 1-aminocyclopropane-1-carboxylate oxidase [Medicago truncatula]
TR47584|c0_g1_i1	0.76	0.73	2.92	0.3	1.43	0.21	6.4	flavonol synthase flavanone 3-hydroxylase	gi|357485645|ref|XP_003613110.1|1-aminocyclopropane-1-carboxylate oxidase [Medicago truncatula] gi|355514445|gb|AES96068.1| 1-aminocyclopropane-1-carboxylate oxidase [Medicago truncatula]
TR44701|c0_g1_i1	3.11	1.12	3.91	1.02	1.45	0.48	5.71	ovarian cancer-associated gene 2 protein	gi|357485613|ref|XP_003613094.1|Ovarian cancer-associated gene 2 protein-like protein [Medicago truncatula] gi|355514429|gb|AES96052.1| Ovarian cancer-associated gene 2 protein-like protein [Medicago truncatula]
TR49791|c0_g1_i1	5.48	1.91	1.47	3.54	0.74	4.67	4.16	transcription initiation factor tfiid subunit 1-a	gi|357484597|ref|XP_003612586.1|Transcription initiation factor TFIID subunit 1-A [Medicago truncatula] gi|355513921|gb|AES95544.1| Transcription initiation factor TFIID subunit 1-A [Medicago truncatula]
TR52344|c0_g1_i1	21.65	18.14	41.25	63.43	78.82	62.9	44.15	ubiquitin carrier protein	gi|357483627|ref|XP_003612100.1|Ubiquitin carrier protein [Medicago truncatula] gi|355513435|gb|AES95058.1| Ubiquitin carrier protein [Medicago truncatula] gi|388496074|gb|AFK36103.1| unknown [Medicago truncatula]
TR76479|c1_g2_i3	10.42	11.85	16.15	4.33	8.15	3.63	12.67	peroxisomal acyl- oxidase 1a	gi|357482107|ref|XP_003611339.1|Peroxisomal acyl-CoA oxidase 1A [Medicago truncatula] gi|355512674|gb|AES94297.1| Peroxisomal acyl-CoA oxidase 1A [Medicago truncatula]
TR70817|c0_g1_i1	19.71	11.37	11.88	15.97	16.5	13.4	16.76	sgt1	gi|357481533|ref|XP_003611052.1|Small glutamine-rich tetratricopeptide repeat-containing protein [Medicago truncatula] gi|355512387|gb|AES94010.1| Small glutamine-rich tetratricopeptide repeat-containing protein [Medicago truncatula]
scaffold13265	51.35	9.01	1.85	0.19	0	0.4	10.16	protein yabby	gi|357476951|ref|XP_003608761.1|Protein YABBY [Medicago truncatula] gi|355509816|gb|AES90958.1| Protein YABBY [Medicago truncatula]
TR61041|c2_g1_i5	0.12	0	1.15	400.71	160.27	126.33	13.5	14 kda proline-rich protein	gi|357476915|ref|XP_003608743.1|14 kDa proline-rich protein DC2.15 [Medicago truncatula] gi|355509798|gb|AES90940.1| 14 kDa proline-rich protein DC2.15 [Medicago truncatula] gi|388508650|gb|AFK42391.1| unknown [Medicago truncatula]
TR47829|c0_g2_i1	107.49	60.73	128.85	116.39	124.98	100.66	91.85	40s ribosomal protein s30	gi|357476845|ref|XP_003608708.1|40S ribosomal protein S30 [Medicago truncatula] gi|357482045|ref|XP_003611308.1| 40S ribosomal protein S30 [Medicago truncatula] gi|355509763|gb|AES90905.1| 40S ribosomal protein S30 [Medicago truncatula] gi|355512643|gb|AES94266.1| 40S ribosomal protein S30 [Medicago truncatula]
Mj_1_GCCAAT_L005_R1_001_(paired)_trimmed_(paired)_contig_10396	3	6.35	2.98	4.48	5.63	2.4	4.82	protein	gi|357475655|ref|XP_003608113.1|hypothetical protein MTR_4g087740 [Medicago truncatula] gi|355509168|gb|AES90310.1| hypothetical protein MTR_4g087740 [Medicago truncatula]
scaffold12585	11.23	7.17	6.43	3.77	4.02	4.24	6.41	nadp-dependent d-sorbitol-6-phosphate dehydrogenase	gi|357473591|ref|XP_003607080.1|NADP-dependent D-sorbitol-6-phosphate dehydrogenase [Medicago truncatula] gi|355508135|gb|AES89277.1| NADP-dependent D-sorbitol-6-phosphate dehydrogenase [Medicago truncatula] gi|388507144|gb|AFK41638.1| unknown [Medicago truncatula]
TR79537|c3_g2_i2	9.77	11.46	9.7	6.68	10.03	12.55	14.88	b3 domain-containing transcription factor vrn1-like	gi|357473115|ref|XP_003606842.1|B3 domain-containing transcription factor VRN1 [Medicago truncatula] gi|355507897|gb|AES89039.1| B3 domain-containing transcription factor VRN1 [Medicago truncatula]
TR79537|c3_g2_i7	9.27	10.14	6.12	5.29	8.49	10.26	13.51	b3 domain-containing transcription factor vrn1-like	gi|357473115|ref|XP_003606842.1|B3 domain-containing transcription factor VRN1 [Medicago truncatula] gi|355507897|gb|AES89039.1| B3 domain-containing transcription factor VRN1 [Medicago truncatula]
TR59577|c0_g1_i1	14.1	8.08	17.46	9.64	10.3	4.36	8.38	e3 ubiquitin-protein ligase	gi|357472995|ref|XP_003606782.1|E3 ubiquitin-protein ligase [Medicago truncatula] gi|355507837|gb|AES88979.1| E3 ubiquitin-protein ligase [Medicago truncatula]
Mj_1_GCCAAT_L005_R1_001_(paired)_trimmed_(paired)_contig_3315	471.6	18.25	222.84	29.39	48.46	25.35	132.09	histone h2b	gi|357472685|ref|XP_003606627.1|Histone H2B [Medicago truncatula] gi|357472689|ref|XP_003606629.1| Histone H2B [Medicago truncatula] gi|355507682|gb|AES88824.1| Histone H2B [Medicago truncatula] gi|355507684|gb|AES88826.1| Histone H2B [Medicago truncatula] gi|388495180|gb|AFK35656.1| unknown [Medicago truncatula]
TR49063|c0_g1_i1	608.37	23.62	278.39	37.72	59.89	29.86	181.34	histone h2b	gi|357472685|ref|XP_003606627.1|Histone H2B [Medicago truncatula] gi|357472689|ref|XP_003606629.1| Histone H2B [Medicago truncatula] gi|355507682|gb|AES88824.1| Histone H2B [Medicago truncatula] gi|355507684|gb|AES88826.1| Histone H2B [Medicago truncatula] gi|388495180|gb|AFK35656.1| unknown [Medicago truncatula]
Mj_1_GCCAAT_L005_R1_001_(paired)_trimmed_(paired)_contig_3518	18.36	41.66	1.95	8.44	2.47	1.37	2.26	rna polymerase alpha subunit	gi|357471543|ref|XP_003606056.1|30S ribosomal protein S11 [Medicago truncatula] gi|355507111|gb|AES88253.1| 30S ribosomal protein S11 [Medicago truncatula]
TR68159|c0_g1_i2	18.29	18.83	7.27	9.44	5.81	8.54	15.38	adenylate kinase	gi|357470697|ref|XP_003605633.1|Adenylate kinase [Medicago truncatula] gi|355506688|gb|AES87830.1| Adenylate kinase [Medicago truncatula] gi|388493354|gb|AFK34743.1| unknown [Medicago truncatula]
TR62730|c1_g1_i3	2.01	2.18	3.13	4.66	5.49	8.77	3.71	spoc domain transcription elongation factor s-ii protein	gi|357466369|ref|XP_003603469.1|Transcription elongation factor A protein [Medicago truncatula] gi|355492517|gb|AES73720.1| Transcription elongation factor A protein [Medicago truncatula]
TR62730|c1_g2_i1	4.24	3.12	4.42	3.88	5.12	5.79	4.18	spoc domain transcription elongation factor s-ii protein	gi|357466369|ref|XP_003603469.1|Transcription elongation factor A protein [Medicago truncatula] gi|355492517|gb|AES73720.1| Transcription elongation factor A protein [Medicago truncatula]
TR64259|c0_g1_i3	2.97	4.72	4.38	0.1	0	0.07	17.27	pleiotropic drug resistance protein 1-like	gi|357466341|ref|XP_003603455.1|Pleiotropic drug resistance protein [Medicago truncatula] gi|355492503|gb|AES73706.1| Pleiotropic drug resistance protein [Medicago truncatula]
TR77325|c3_g2_i1	4.37	5.35	6.38	6.38	3.92	3.1	5.17	subtilisin-like protease	gi|357466001|ref|XP_003603285.1|hypothetical protein MTR_3g105890 [Medicago truncatula] gi|355492333|gb|AES73536.1| hypothetical protein MTR_3g105890 [Medicago truncatula]
TR69337|c0_g1_i3	2.34	0.16	3.54	5.83	9.98	7.22	5.43	protein	gi|357465501|ref|XP_003603035.1|Laccase-15 [Medicago truncatula] gi|355492083|gb|AES73286.1| Laccase-15 [Medicago truncatula]
scaffold1039	3.81	4.31	10.13	6.72	20.88	0	5.84	gpi-anchored protein	gi|357462943|ref|XP_003601753.1|hypothetical protein MTR_3g085020 [Medicago truncatula] gi|355490801|gb|AES72004.1| hypothetical protein MTR_3g085020 [Medicago truncatula]
TR76360|c0_g1_i2	5.12	8.39	4.52	1.16	3.55	1.22	6.3	myb transcription factor	gi|357462655|ref|XP_003601609.1|Myb transcription factor [Medicago truncatula] gi|355490657|gb|AES71860.1| Myb transcription factor [Medicago truncatula]
TR75587|c1_g1_i2	24.73	17.27	39.19	27.79	33.03	24.01	41.39	subtilisin-like protease	gi|357460305|ref|XP_003600434.1|Subtilisin-like protease [Medicago truncatula] gi|355489482|gb|AES70685.1| Subtilisin-like protease [Medicago truncatula]
TR74649|c0_g1_i3	1.2	1.97	0.4	4.89	5.12	7.03	1.35	telomere repeat-binding protein 5-like	gi|357454167|ref|XP_003597364.1|Telomeric repeat-binding protein [Medicago truncatula] gi|355486412|gb|AES67615.1| Telomeric repeat-binding protein [Medicago truncatula]
Mj_1_GCCAAT_L005_R1_001_(paired)_trimmed_(paired)_contig_16464	1.38	1.98	0.49	3.96	2.48	5.23	1.64	otu-like cysteine type protease	gi|357453181|ref|XP_003596867.1|OTU domain-containing protein [Medicago truncatula] gi|355485915|gb|AES67118.1| OTU domain-containing protein [Medicago truncatula]
scaffold12902	5.4	5.36	13.92	9.85	7.27	8.93	6.82	gtp-binding protein sar1a	gi|357449027|ref|XP_003594789.1|GTP-binding protein SAR1A [Medicago truncatula] gi|355483837|gb|AES65040.1| GTP-binding protein SAR1A [Medicago truncatula] gi|388509862|gb|AFK42997.1| unknown [Medicago truncatula] gi|388516193|gb|AFK46158.1| unknown [Medicago truncatula]
TR75546|c0_g1_i4	9.19	8.46	8.34	7.56	8.76	8.91	12.11	methylmalonate-semialdehyde dehydrogenase	gi|357446015|ref|XP_003593285.1|Methylmalonate-semialdehyde dehydrogenase [Medicago truncatula] gi|355482333|gb|AES63536.1| Methylmalonate-semialdehyde dehydrogenase [Medicago truncatula]
scaffold14016	144.09	62.27	128.42	160.87	103.78	118.06	79.1	tubulin beta-2 beta-3 chain	gi|357444013|ref|XP_003592284.1|Tubulin beta chain [Medicago truncatula] gi|355481332|gb|AES62535.1| Tubulin beta chain [Medicago truncatula]
TR59739|c0_g1_i2	16.73	15.07	16.22	7.48	12.33	7.63	11.63	ureidoglycolate hydrolase	gi|357443405|ref|XP_003591980.1|hypothetical protein MTR_1g095890 [Medicago truncatula] gi|355481028|gb|AES62231.1| hypothetical protein MTR_1g095890 [Medicago truncatula]
TR61701|c0_g1_i2	0.37	0.26	0.98	5.88	0.28	4.42	0	loc100158653 protein	gi|357443319|ref|XP_003591937.1|Serotransferrin [Medicago truncatula] gi|355480985|gb|AES62188.1| Serotransferrin [Medicago truncatula]
TR64263|c0_g1_i1	0.17	0.22	0.6	5.97	0.17	4.37	0.56	melanotransferrin precursor	gi|357443319|ref|XP_003591937.1|Serotransferrin [Medicago truncatula] gi|355480985|gb|AES62188.1| Serotransferrin [Medicago truncatula]
TR74683|c1_g2_i3	5.93	3.79	1.03	0.7	0.98	1.21	2.38	rna recognition motif-containing protein	gi|357442985|ref|XP_003591770.1|RNA-binding protein [Medicago truncatula] gi|355480818|gb|AES62021.1| RNA-binding protein [Medicago truncatula]
Mj_1_GCCAAT_L005_R1_001_(paired)_trimmed_(paired)_contig_4532	23.36	18.03	16.29	10.05	15.54	13.54	24.55	translationally-controlled tumor protein	gi|357441745|ref|XP_003591150.1|Translationally-controlled tumor protein-like protein [Medicago truncatula] gi|355480198|gb|AES61401.1| Translationally-controlled tumor protein-like protein [Medicago truncatula]
TR70904|c1_g2_i1	13.49	11.63	19.54	13.8	26.6	10.52	12.79	ggamma-subunit 1	gi|357440557|ref|XP_003590556.1|hypothetical protein MTR_1g071100 [Medicago truncatula] gi|355479604|gb|AES60807.1| hypothetical protein MTR_1g071100 [Medicago truncatula]
TR62131|c0_g1_i1	3.83	5.48	9.5	4.13	8.19	4.71	11.88	hypothetical protein MTR_1g045660	gi|357439809|ref|XP_003590182.1|hypothetical protein MTR_1g045660 [Medicago truncatula] gi|355479230|gb|AES60433.1| hypothetical protein MTR_1g045660 [Medicago truncatula] gi|388494976|gb|AFK35554.1| unknown [Medicago truncatula]
TR62131|c0_g1_i2	2.06	3.58	7.06	2.38	6.99	1.87	8.67	hypothetical protein MTR_1g045660	gi|357439809|ref|XP_003590182.1|hypothetical protein MTR_1g045660 [Medicago truncatula] gi|355479230|gb|AES60433.1| hypothetical protein MTR_1g045660 [Medicago truncatula] gi|388494976|gb|AFK35554.1| unknown [Medicago truncatula]
TR45307|c1_g1_i1	7.9	13.13	7.31	225.88	83.82	15.48	31.34	cell wall-associated hydrolase	gi|357436159|ref|XP_003588355.1|Mitochondrial protein, putative [Medicago truncatula] gi|355477403|gb|AES58606.1| Mitochondrial protein, putative [Medicago truncatula]
TR68433|c1_g1_i3	0.3	0.16	0.7	6.33	4.42	1.46	0.86	nadh dehydrogenase subunit 2	gi|357436153|ref|XP_003588352.1|NADH dehydrogenase subunit [Medicago truncatula] gi|355477400|gb|AES58603.1| NADH dehydrogenase subunit [Medicago truncatula]
TR70872|c1_g1_i1	0.34	0.1	0.35	6.77	2.72	0.72	0.26	nadh dehydrogenase subunit 5	gi|357436143|ref|XP_003588347.1|NADH-ubiquinone oxidoreductase chain [Medicago truncatula] gi|355477395|gb|AES58598.1| NADH-ubiquinone oxidoreductase chain [Medicago truncatula]
TR72681|c0_g1_i1	0.23	0	0.55	7.73	1.73	0	0.69	nadh dehydrogenase subunit 5	gi|357436143|ref|XP_003588347.1|NADH-ubiquinone oxidoreductase chain [Medicago truncatula] gi|355477395|gb|AES58598.1| NADH-ubiquinone oxidoreductase chain [Medicago truncatula]
Mj_1_GCCAAT_L005_R1_001_(paired)_trimmed_(paired)_contig_3148	2.54	7.38	0.57	10.26	3.02	1.03	1.08	nadh dehydrogenase subunit 4	gi|357435979|ref|XP_003588265.1|NADH-ubiquinone oxidoreductase chain [Medicago truncatula] gi|355477313|gb|AES58516.1| NADH-ubiquinone oxidoreductase chain [Medicago truncatula]
TR74294|c1_g1_i6	2.15	4.33	4.05	18.06	10.58	37.62	10.17	protein	gi|357165308|ref|XP_003580339.1|PREDICTED: uncharacterized protein LOC100826618 [Brachypodium distachyon]
Mj_1_GCCAAT_L005_R1_001_(paired)_trimmed_(paired)_contig_741	54.39	34.96	110.19	51.68	64.59	25.54	77	inosine triphosphate pyrophosphatase	gi|357146474|ref|XP_003574005.1|PREDICTED: inosine triphosphate pyrophosphatase-like [Brachypodium distachyon]
TR76753|c0_g1_i1	8.43	3.45	9.48	5.21	4.13	4.01	4.23	at5g65440 mna5_17	gi|357143820|ref|XP_003573066.1|PREDICTED: uncharacterized protein LOC100836262 [Brachypodium distachyon]
scaffold10212	3.07	4.63	2.71	3.05	3.83	2.84	5.93	gaba receptor-associated	gi|357139629|ref|XP_003571383.1|PREDICTED: autophagy-related protein 8C-like [Brachypodium distachyon]
scaffold12624	39.32	29.91	58.35	65.64	50.39	55.05	48.06	26s protease regulatory subunit 6a	gi|357125108|ref|XP_003564237.1|PREDICTED: 26S protease regulatory subunit 6A homolog isoform 1 [Brachypodium distachyon]
TR66223|c0_g2_i1	8.61	4.2	8.69	8.64	8.92	6.24	6.06	PREDICTED: uncharacterized protein DDB_G0288155-like	gi|357121737|ref|XP_003562574.1|PREDICTED: uncharacterized protein DDB_G0288155-like [Brachypodium distachyon]
TR59719|c0_g1_i4	2.49	2.37	5.48	2.79	5.17	1.88	3.46	26s proteasome non-atpase regulatory subunit 10	gi|357114816|ref|XP_003559190.1|PREDICTED: 26S proteasome non-ATPase regulatory subunit 10-like [Brachypodium distachyon]
TR56987|c0_g1_i2	20.79	9.91	11.52	8.83	9.38	8.99	9.57	PREDICTED: uncharacterized protein LOC100804019	gi|356577710|ref|XP_003556967.1|PREDICTED: uncharacterized protein LOC100804019 [Glycine max]
Mj_1_GCCAAT_L005_R1_001_(paired)_trimmed_(paired)_contig_17724	4.26	4.14	5.29	7.12	12.09	4.26	5.57	crt homolog 1-like	gi|356577341|ref|XP_003556785.1|PREDICTED: crt homolog 1-like [Glycine max]
TR70405|c1_g1_i2	3.46	4.4	5.31	2.84	5.51	8.06	10.05	crt homolog 1-like	gi|356577341|ref|XP_003556785.1|PREDICTED: crt homolog 1-like [Glycine max]
TR54560|c0_g1_i1	66.66	45.47	99.66	103.77	99.24	85.27	78.67	26s proteasome aaa-atpase subunit rpt5a	gi|356576799|ref|XP_003556517.1|PREDICTED: 26S protease regulatory subunit 6A homolog A-like [Glycine max]
Mj_1_GCCAAT_L005_R1_001_(paired)_trimmed_(paired)_contig_1790	31.06	5.37	5.1	2.22	2.72	2.36	7.27	nucleoside nucleotide kinase domain-containing protein	gi|356576489|ref|XP_003556363.1|PREDICTED: uncharacterized protein LOC100796923 [Glycine max]
TR71711|c1_g1_i6	5.46	4.41	0.55	0.58	0.77	1.09	1.48	nucleoside nucleotide kinase domain-containing protein	gi|356576489|ref|XP_003556363.1|PREDICTED: uncharacterized protein LOC100796923 [Glycine max]
TR65555|c1_g1_i2	2.57	3.33	6.47	4.55	4.71	8.12	3.31	ring u-box domain-containing protein	gi|356576355|ref|XP_003556298.1|PREDICTED: uncharacterized protein LOC100805607 [Glycine max]
TR65858|c0_g2_i1	181.42	82.47	161.01	206.44	126.06	150.46	100.35	beta chain	gi|356575969|ref|XP_003556108.1|PREDICTED: tubulin beta-1 chain-like [Glycine max]
Mj_1_GCCAAT_L005_R1_001_(paired)_trimmed_(paired)_contig_5264	13.78	10.97	15.51	18.77	17.14	21.65	17.46	abc transporter family protein	gi|356575104|ref|XP_003555682.1|PREDICTED: ABC transporter F family member 3-like [Glycine max]
TR52193|c0_g1_i2	1.18	0.37	0.46	0	0	0	11.22	gdsl esterase lipase	gi|356574859|ref|XP_003555561.1|PREDICTED: GDSL esterase/lipase At5g33370-like [Glycine max]
TR57101|c0_g1_i2	3.55	3.58	3.44	5.31	9.07	9.75	7.21	inositol-tetrakisphosphate 1-kinase 2	gi|356574337|ref|XP_003555305.1|PREDICTED: inositol-tetrakisphosphate 1-kinase 2-like [Glycine max]
TR58612|c0_g1_i1	3.09	2.27	2.66	3.78	3.2	7.27	3.99	inositol-tetrakisphosphate 1-kinase 2	gi|356574337|ref|XP_003555305.1|PREDICTED: inositol-tetrakisphosphate 1-kinase 2-like [Glycine max]
Mj_1_GCCAAT_L005_R1_001_(paired)_trimmed_(paired)_contig_54444	0.42	0.8	45.91	1	0	6.73	8.46	non-specific lipid-transfer protein 2-like	gi|356573851|ref|XP_003555069.1|PREDICTED: probable non-specific lipid-transfer protein AKCS9-like [Glycine max]
TR48057|c0_g1_i1	0.39	2.43	86.16	2.79	0	12.57	14.45	non-specific lipid-transfer protein 2-like	gi|356573851|ref|XP_003555069.1|PREDICTED: probable non-specific lipid-transfer protein AKCS9-like [Glycine max]
TR55225|c0_g1_i2	4.54	3.88	5.35	3.01	4.54	2.42	5.33	hat family dimerization domain containing protein	gi|356573522|ref|XP_003554907.1|PREDICTED: uncharacterized protein LOC100795132 [Glycine max]
scaffold1448	4.58	4.25	6.36	6.76	6.63	9.66	6.92	amp-activated protein gamma regulatory	gi|356573006|ref|XP_003554656.1|PREDICTED: sucrose nonfermenting 4-like protein-like isoform 1 [Glycine max]
Mj_1_GCCAAT_L005_R1_001_(paired)_trimmed_(paired)_contig_5959	85.31	55.98	13.03	6.35	6.43	6.01	17.86	33 kda chloroplastic-like	gi|356572637|ref|XP_003554474.1|PREDICTED: 33 kDa ribonucleoprotein, chloroplastic-like [Glycine max]
TR53523|c0_g1_i1	0.93	3.28	0.31	3.99	0.4	3.82	11.23	b-type cyclin	gi|356572600|ref|XP_003554456.1|PREDICTED: uncharacterized protein LOC100805043 [Glycine max]
TR53523|c0_g1_i2	3.21	7	1.98	13.34	1.14	8.99	24.71	b-type cyclin	gi|356572600|ref|XP_003554456.1|PREDICTED: uncharacterized protein LOC100805043 [Glycine max]
TR64723|c0_g1_i1	7.94	23.34	0.46	1.42	0.92	0.25	13.78	glucosyl transferase	gi|356572494|ref|XP_003554403.1|PREDICTED: UDP-glycosyltransferase 73C2-like [Glycine max]
TR65293|c0_g2_i2	3.36	4.29	5.06	5.77	5.19	5.47	3.96	two-component response regulator arr	gi|356572282|ref|XP_003554298.1|PREDICTED: uncharacterized protein LOC100810560 [Glycine max]
C974508	0	0.23	0.22	2.91	2.84	5.17	1.27	plasma membrane h+-atpase	gi|356572262|ref|XP_003554288.1|PREDICTED: ATPase 11, plasma membrane-type-like [Glycine max]
TR73391|c0_g1_i1	6.14	3.7	5.04	4.14	4.33	3.92	4.79	actin-related protein 5	gi|356569368|ref|XP_003552874.1|PREDICTED: actin-related protein 5-like [Glycine max]
TR74419|c0_g1_i1	6.2	4.2	5.9	4.14	3.96	4.06	5.1	actin-related protein 5	gi|356569368|ref|XP_003552874.1|PREDICTED: actin-related protein 5-like [Glycine max]
TR74419|c0_g1_i3	6.05	4.34	5.25	4.42	4.11	4.02	4.38	actin-related protein 5	gi|356569368|ref|XP_003552874.1|PREDICTED: actin-related protein 5-like [Glycine max]
Mj_1_GCCAAT_L005_R1_001_(paired)_trimmed_(paired)_contig_87138	0	0	2.12	2.03	0.38	6.25	0	lipid transfer protein	gi|356569045|ref|XP_003552717.1|PREDICTED: probable non-specific lipid-transfer protein AKCS9 [Glycine max]
TR67435|c0_g2_i2	2.92	0.37	5.72	0.62	1.45	0.65	1.92	protein	gi|356568738|ref|XP_003552567.1|PREDICTED: serine carboxypeptidase-like 25-like isoform 2 [Glycine max]
Mj_1_GCCAAT_L005_R1_001_(paired)_trimmed_(paired)_contig_12177	34.02	57.93	29.55	17.85	24.75	4.16	63.79	haloacid dehalogenase-like hydrolase domain-containing protein	gi|356567951|ref|XP_003552178.1|PREDICTED: uncharacterized protein LOC100777400 [Glycine max]
TR75553|c0_g1_i3	26.05	41.63	22.67	14.4	17.72	3.97	41.53	haloacid dehalogenase-like hydrolase domain-containing protein	gi|356567951|ref|XP_003552178.1|PREDICTED: uncharacterized protein LOC100777400 [Glycine max]
TR62259|c0_g1_i3	75.65	32.75	415.85	11.43	17.44	11.93	27.39	expansin	gi|356567941|ref|XP_003552173.1|PREDICTED: expansin-A4-like [Glycine max]
TR69205|c0_g1_i3	5.2	3.77	4.51	3.2	5.21	5.7	4.1	cyclin family protein	gi|356567806|ref|XP_003552106.1|PREDICTED: cyclin-C1-2-like isoform 1 [Glycine max]
TR72495|c1_g1_i1	5.12	4.22	4.53	3.92	6.98	6.6	5.33	cyclin family protein	gi|356567806|ref|XP_003552106.1|PREDICTED: cyclin-C1-2-like isoform 1 [Glycine max]
TR72495|c1_g1_i2	4.86	4.78	5.18	5.28	6.05	6.64	5.05	cyclin family protein	gi|356567806|ref|XP_003552106.1|PREDICTED: cyclin-C1-2-like isoform 1 [Glycine max]
TR75060|c4_g1_i2	16.43	16.9	7.51	3.56	4.82	5.41	8.34	geminivirus rep-interacting motor	gi|356567769|ref|XP_003552088.1|PREDICTED: geminivirus Rep-interacting motor protein-like [Glycine max]
C957126	10.01	7.88	25.6	20.3	19.74	14.43	16.43	at1g16240 f3o9_4	gi|356567068|ref|XP_003551745.1|PREDICTED: syntaxin-51-like [Glycine max]
Mj_1_GCCAAT_L005_R1_001_(paired)_trimmed_(paired)_contig_15087	17.76	13.09	41.82	26.51	30.05	20.86	26.36	at1g16240 f3o9_4	gi|356567068|ref|XP_003551745.1|PREDICTED: syntaxin-51-like [Glycine max]
TR54938|c0_g1_i1	14.67	12.48	38.21	27.22	28	21.88	23.84	at1g16240 f3o9_4	gi|356567068|ref|XP_003551745.1|PREDICTED: syntaxin-51-like [Glycine max]
TR69866|c0_g5_i15	3.72	2.49	6.57	0.88	3.61	4.12	3.85	eukaryotic initiation factor 4a-11-like	gi|356564782|ref|XP_003550627.1|PREDICTED: uncharacterized protein LOC100806423 [Glycine max]
TR73295|c0_g1_i4	1.96	4.68	10.58	8.55	8.54	6.34	4.83	amsh-like ubiquitin thiolesterase 3-like	gi|356564628|ref|XP_003550553.1|PREDICTED: AMSH-like ubiquitin thiolesterase 3-like [Glycine max]
TR57817|c0_g1_i5	3.5	1.44	8.69	2.41	2.55	0.21	5.79	pollen-specific protein sf21-like	gi|356564067|ref|XP_003550278.1|PREDICTED: pollen-specific protein SF21-like isoform 1 [Glycine max]
TR70931|c1_g1_i5	4.6	3.89	5.91	1.5	2.51	3.26	6.51	protein	gi|356563541|ref|XP_003550020.1|PREDICTED: uncharacterized protein At2g23090 [Glycine max] gi|255626773|gb|ACU13731.1| unknown [Glycine max]
scaffold11769	2.92	1.62	5.79	7.08	3.45	5.29	2.58	PREDICTED: uncharacterized protein LOC100808179	gi|356563332|ref|XP_003549918.1|PREDICTED: uncharacterized protein LOC100808179 [Glycine max]
TR73183|c0_g1_i1	3.49	5.19	5.07	3.56	3.77	3.83	3.34	membrane bound o-acyl transferase family protein	gi|356563222|ref|XP_003549863.1|PREDICTED: membrane-bound O-acyltransferase domain-containing protein 2-like [Glycine max]
Mj_1_GCCAAT_L005_R1_001_(paired)_trimmed_(paired)_contig_1744	42.33	40.9	21.09	4.26	6.11	2.55	38.9	nadp-dependent glyceraldehyde-3-phosphate dehydrogenase	gi|356562585|ref|XP_003549550.1|PREDICTED: NADP-dependent glyceraldehyde-3-phosphate dehydrogenase-like [Glycine max]
TR58964|c1_g1_i1	58.8	57.1	31.46	4.68	7.12	1.94	63.01	nadp-dependent glyceraldehyde-3-phosphate dehydrogenase	gi|356562585|ref|XP_003549550.1|PREDICTED: NADP-dependent glyceraldehyde-3-phosphate dehydrogenase-like [Glycine max]
TR58964|c1_g1_i2	60.45	59.54	33.37	5.44	8.77	2.21	61.82	nadp-dependent glyceraldehyde-3-phosphate dehydrogenase	gi|356562585|ref|XP_003549550.1|PREDICTED: NADP-dependent glyceraldehyde-3-phosphate dehydrogenase-like [Glycine max]
Mj_1_GCCAAT_L005_R1_001_(paired)_trimmed_(paired)_contig_13538	10.81	9.52	31.96	22.77	13.66	24.73	17.02	protein yipf6-like	gi|356562445|ref|XP_003549482.1|PREDICTED: protein YIPF6-like [Glycine max]
TR57775|c1_g1_i2	7.34	8.24	20.84	13.94	11.41	19.82	8.66	yip1 domain family member 6	gi|356562445|ref|XP_003549482.1|PREDICTED: protein YIPF6-like [Glycine max]
TR70971|c0_g2_i1	4.6	0.41	5.92	0.23	0	0.32	2.83	protein	gi|356562413|ref|XP_003549466.1|PREDICTED: pathogenesis-related protein 5-like, partial [Glycine max]
TR64818|c0_g1_i1	6.74	3.21	13.84	4.98	5.43	5.77	7.39	syntaxin	gi|356561098|ref|XP_003548822.1|PREDICTED: syntaxin-22-like [Glycine max]
TR64818|c0_g1_i3	5.53	5.34	15.74	6.24	6	6.85	6.98	syntaxin related protein am3p	gi|356561098|ref|XP_003548822.1|PREDICTED: syntaxin-22-like [Glycine max]
TR64818|c1_g1_i1	3.98	4.53	14.2	5.71	5.76	4.85	6.33	syntaxin homologue	gi|356561098|ref|XP_003548822.1|PREDICTED: syntaxin-22-like [Glycine max]
TR64818|c1_g1_i4	1.8	2.11	5.04	2.85	3.72	5.07	1.77	syntaxin homologue	gi|356561098|ref|XP_003548822.1|PREDICTED: syntaxin-22-like [Glycine max]
Mj_1_GCCAAT_L005_R1_001_(paired)_trimmed_(paired)_contig_68731	0.05	2.07	29.52	20.86	0	49.33	0.1	solute carrier family 22 member 3-like	gi|356560049|ref|XP_003548308.1|PREDICTED: solute carrier family 22 member 3-like isoform 1 [Glycine max] gi|356560051|ref|XP_003548309.1| PREDICTED: solute carrier family 22 member 3-like isoform 2 [Glycine max]
TR73307|c0_g1_i1	3.34	2.42	3	6.65	4.65	6.88	3.95	dead box atp-dependent rna	gi|356558103|ref|XP_003547347.1|PREDICTED: DEAD-box ATP-dependent RNA helicase 40-like [Glycine max]
TR73307|c0_g1_i3	2.83	2.05	3.39	6.61	5.48	6.92	3.52	dead box atp-dependent rna	gi|356558103|ref|XP_003547347.1|PREDICTED: DEAD-box ATP-dependent RNA helicase 40-like [Glycine max]
TR74084|c0_g1_i3	3.21	2.38	2.71	6.97	3.85	7.74	3.77	dead box atp-dependent rna	gi|356558103|ref|XP_003547347.1|PREDICTED: DEAD-box ATP-dependent RNA helicase 40-like [Glycine max]
scaffold10421	2.89	2.49	2.53	5.48	4.28	6.71	3.03	dead box atp-dependent rna	gi|356558103|ref|XP_003547347.1|PREDICTED: DEAD-box ATP-dependent RNA helicase 40-like [Glycine max]
scaffold10422	2.03	1.71	2.34	5.23	4.41	6.86	3.13	dead box atp-dependent rna	gi|356558103|ref|XP_003547347.1|PREDICTED: DEAD-box ATP-dependent RNA helicase 40-like [Glycine max]
TR55427|c0_g1_i1	14.06	16.76	16.35	25.88	26.96	31.56	13	pumilio 2	gi|356557841|ref|XP_003547219.1|PREDICTED: pumilio homolog 2-like [Glycine max]
Mj_1_GCCAAT_L005_R1_001_(paired)_trimmed_(paired)_contig_6551	10.59	6.25	5.17	19.62	15.37	53.45	12.31	callose synthase 11-like	gi|356557685|ref|XP_003547144.1|PREDICTED: callose synthase 11-like [Glycine max]
TR77351|c0_g2_i1	5.79	3.59	0.51	1.38	2.17	1.13	1.14	probable plastid-lipid-associated protein chloroplastic-like	gi|356557505|ref|XP_003547056.1|PREDICTED: probable plastid-lipid-associated protein 4, chloroplastic-like [Glycine max]
Mj_1_GCCAAT_L005_R1_001_(paired)_trimmed_(paired)_contig_2864	11.62	10.41	15.75	12.74	13.04	21.64	12.5	serine threonine protein phosphatase 2a 55 kda regulatory subunit b beta isoform-like	gi|356556686|ref|XP_003546654.1|PREDICTED: serine/threonine protein phosphatase 2A 55 kDa regulatory subunit B beta isoform-like [Glycine max]
TR44079|c1_g1_i1	31.88	10.41	37.27	3.36	2.46	1.83	12.78	kinesin-like protein kif2a-like	gi|356556177|ref|XP_003546403.1|PREDICTED: kinesin-like protein KIF2A-like [Glycine max]
TR70652|c2_g3_i1	1.18	1.33	1.77	2.39	4.51	2.27	5.94	gdsl esterase lipase	gi|356555400|ref|XP_003546020.1|PREDICTED: GDSL esterase/lipase At5g45920-like [Glycine max]
Mj_1_GCCAAT_L005_R1_001_(paired)_trimmed_(paired)_contig_21734	11.84	14.02	5.61	5.83	6.31	4.84	5.64	molecular chaperone hsp40 -like protein	gi|356554947|ref|XP_003545802.1|PREDICTED: chaperone protein DnaJ-like isoform 2 [Glycine max]
scaffold1174	2.08	5.69	1.31	0.66	1.24	1.39	1.91	molecular chaperone hsp40 -like protein	gi|356554945|ref|XP_003545801.1|PREDICTED: chaperone protein DnaJ-like isoform 1 [Glycine max]
TR49409|c0_g1_i2	19.32	29.59	3.54	4.36	4.85	3.6	8.14	protein	gi|356554217|ref|XP_003545445.1|PREDICTED: uncharacterized protein LOC100810445 [Glycine max]
TR71165|c0_g5_i1	2.47	2.35	1.98	3.3	4.6	7.04	2.64	12-oxophytodienoate reductase 11-like	gi|356553315|ref|XP_003545002.1|PREDICTED: 12-oxophytodienoate reductase 1-like [Glycine max]
TR68081|c2_g1_i9	2.35	0.6	1.85	6.47	19.68	0.87	3.71	cohesin loading complex subunit scc4-like protein	gi|356553202|ref|XP_003544947.1|PREDICTED: uncharacterized protein LOC100780498 [Glycine max]
TR61263|c1_g5_i2	6.23	12.37	4.33	3.3	4.54	5.32	5.36	probable nadh dehydrogenase-like	gi|356553084|ref|XP_003544888.1|PREDICTED: probable NADH dehydrogenase-like [Glycine max]
TR65726|c2_g1_i1	1.54	1.65	1.81	8.87	9.66	6.1	13.1	pirin-like protein	gi|356552737|ref|XP_003544719.1|PREDICTED: pirin-like protein-like [Glycine max]
TR65816|c0_g1_i3	2.22	1.53	3.05	4.51	7.21	1.92	1.58	transcription factor bhlh74-like	gi|356552284|ref|XP_003544498.1|PREDICTED: transcription factor bHLH74-like [Glycine max]
TR67369|c2_g1_i2	1.36	1.95	2.66	3.22	3.03	5.25	1.34	PREDICTED: uncharacterized protein LOC100306476	gi|356552216|ref|XP_003544465.1|PREDICTED: uncharacterized protein LOC100306476 [Glycine max]
TR73419|c3_g2_i8	13	7.95	16.36	6.03	8.68	5.21	11.25	rossmann-fold nad -binding domain-containing protein	gi|356552007|ref|XP_003544363.1|PREDICTED: uncharacterized protein C1A6.10-like [Glycine max]
TR20775|c0_g2_i1	0.41	2.96	6.9	0.19	0.35	0.52	3.94	signal recognition particle 54 kda protein 2-like	gi|356550626|ref|XP_003543686.1|PREDICTED: signal recognition particle 54 kDa protein 2-like [Glycine max]
TR70326|c0_g1_i1	12.21	10.22	18.43	14.91	18.2	23.13	15.15	serine threonine protein phosphatase 2a 55 kda regulatory subunit b beta isoform-like	gi|356550460|ref|XP_003543605.1|PREDICTED: serine/threonine protein phosphatase 2A 55 kDa regulatory subunit B beta isoform-like [Glycine max]
TR54342|c0_g2_i1	974.32	28.48	388.47	27.39	45.07	21.45	251.83	histone h2a	gi|356550263|ref|XP_003543507.1|PREDICTED: histone H2A-like [Glycine max]
TR56083|c2_g1_i1	739.28	22.25	286.31	20.16	40.09	14.1	202.41	histone h2a	gi|356550263|ref|XP_003543507.1|PREDICTED: histone H2A-like [Glycine max]
TR65372|c2_g1_i1	3.64	4.29	37.52	56.79	68.86	38.97	16.17	caffeic acid 3-o-methyltransferase	gi|356549592|ref|XP_003543176.1|PREDICTED: caffeic acid 3-O-methyltransferase-like [Glycine max]
Mj_1_GCCAAT_L005_R1_001_(paired)_trimmed_(paired)_contig_80735	0	0.13	0.96	6.5	1.43	10.16	0.4	abscisic acid receptor pyl6	gi|356549232|ref|XP_003543001.1|PREDICTED: abscisic acid receptor PYL6-like [Glycine max]
TR51001|c0_g1_i1	0	0	0.32	4.12	1.84	6.68	0.13	abscisic acid receptor pyl6	gi|356549232|ref|XP_003543001.1|PREDICTED: abscisic acid receptor PYL6-like [Glycine max]
Mj_1_GCCAAT_L005_R1_001_(paired)_trimmed_(paired)_contig_13223	6.98	7.02	11.87	31.37	15.84	26.63	8.05	integrin-linked protein kinase family protein	gi|356549162|ref|XP_003542966.1|PREDICTED: probable serine/threonine-protein kinase drkA-like [Glycine max]
Mj_1_GCCAAT_L005_R1_001_(paired)_trimmed_(paired)_contig_59687	0.35	0.11	0.97	7.64	6.68	8.35	3.7	peptidoglycan-binding domain-containing protein	gi|356548405|ref|XP_003542592.1|PREDICTED: uncharacterized protein LOC100786697 [Glycine max]
TR58907|c0_g1_i2	13.68	23.54	2.87	0.18	0.67	0.49	4.32	fkbp-like peptidyl-prolyl cis-trans isomerase-like protein	gi|356548345|ref|XP_003542563.1|PREDICTED: LOW QUALITY PROTEIN: probable FKBP-type peptidyl-prolyl cis-trans isomerase 1, chloroplastic-like [Glycine max]
Mj_1_GCCAAT_L005_R1_001_(paired)_trimmed_(paired)_contig_9237	3.87	2.23	1.46	5.85	3.6	6.68	2.93	protein	gi|356548025|ref|XP_003542404.1|PREDICTED: uncharacterized protein LOC100776940 [Glycine max]
TR76529|c0_g3_i2	3.97	2.62	2.29	6.39	4.75	6.74	3.12	protein	gi|356548025|ref|XP_003542404.1|PREDICTED: uncharacterized protein LOC100776940 [Glycine max]
scaffold10599	5.54	3.25	3.12	6.22	5.42	8.38	3.83	protein	gi|356548025|ref|XP_003542404.1|PREDICTED: uncharacterized protein LOC100776940 [Glycine max]
Mj_1_GCCAAT_L005_R1_001_(paired)_trimmed_(paired)_contig_5184	8.53	4.63	13.52	15.15	12.7	15.48	6.68	protein strubbelig-receptor family 3-like	gi|356547026|ref|XP_003541919.1|PREDICTED: protein STRUBBELIG-RECEPTOR FAMILY 3-like [Glycine max]
TR79730|c2_g2_i1	9.62	7.98	7.51	2.8	5.67	2.75	8.93	protein strubbelig-receptor family 3-like	gi|356547026|ref|XP_003541919.1|PREDICTED: protein STRUBBELIG-RECEPTOR FAMILY 3-like [Glycine max]
TR57735|c0_g1_i1	12.35	12.28	30.75	24.07	14.85	23.03	17.05	protein yipf6-like	gi|356546830|ref|XP_003541825.1|PREDICTED: protein YIPF6-like [Glycine max]
TR49790|c0_g1_i1	0.88	1.68	7.27	4.43	6.16	2.77	2.75	clathrin assembly protein	gi|356546112|ref|XP_003541475.1|PREDICTED: putative clathrin assembly protein At2g25430-like [Glycine max]
TR79537|c3_g2_i12	6.85	10.36	6.19	4.35	6.14	8.9	9.36	b3 domain-containing transcription factor vrn1-like	gi|356545379|ref|XP_003541121.1|PREDICTED: B3 domain-containing transcription factor VRN1-like [Glycine max]
TR66470|c0_g1_i1	14.82	1.89	7.55	0.51	0.77	0.79	3.3	targeting protein for xklp2	gi|356544988|ref|XP_003540928.1|PREDICTED: uncharacterized protein LOC100783702 [Glycine max]
TR72872|c1_g1_i10	13.67	1.63	6.5	0.84	0.79	0.51	4.22	targeting protein for xklp2	gi|356544988|ref|XP_003540928.1|PREDICTED: uncharacterized protein LOC100783702 [Glycine max]
TR78644|c2_g2_i1	49.17	1.93	21.38	0.4	0.75	0.28	8.18	targeting protein for xklp2	gi|356544988|ref|XP_003540928.1|PREDICTED: uncharacterized protein LOC100783702 [Glycine max]
TR55877|c0_g2_i1	0.78	22.7	2.46	26.17	30.33	0.29	1.42	ubiquitin-conjugating enzyme e2 10	gi|356544896|ref|XP_003540883.1|PREDICTED: ubiquitin-conjugating enzyme E2 10-like [Glycine max]
TR68530|c0_g1_i1	0.06	0	1.22	2.91	5.65	0.09	0.11	g-type lectin s-receptor-like serine threonine-protein kinase at4g03230-like	gi|356544860|ref|XP_003540865.1|PREDICTED: G-type lectin S-receptor-like serine/threonine-protein kinase At4g03230-like [Glycine max]
TR52008|c0_g1_i2	26.76	20.39	57.78	15.23	30.46	10.66	41.87	nadh dehydrogenase	gi|356544248|ref|XP_003540566.1|PREDICTED: NADH dehydrogenase [ubiquinone] 1 beta subcomplex subunit 2 [Glycine max]
Mj_1_GCCAAT_L005_R1_001_(paired)_trimmed_(paired)_contig_31687	2.1	1.34	0	0	0	0	27.93	cytochrome p450	gi|356544194|ref|XP_003540539.1|PREDICTED: cytochrome P450 705A20-like [Glycine max]
TR66430|c0_g2_i3	2.29	5.87	3.6	4.03	5.68	4.78	4.01	at1g53450 t3f20_17	gi|356544120|ref|XP_003540503.1|PREDICTED: uncharacterized protein LOC100815050 [Glycine max]
TR61044|c0_g1_i1	5.46	6.33	3.98	2.7	2.54	1.89	4.16	lipoic acid synthase	gi|356543805|ref|XP_003540350.1|PREDICTED: lipoyl synthase 2, mitochondrial-like [Glycine max]
scaffold11539	10.72	9.17	27.24	11.03	19.08	16.88	16.67	cox viia-like protein	gi|356543560|ref|XP_003540228.1|PREDICTED: uncharacterized protein LOC100800807 [Glycine max]
TR75888|c3_g1_i4	5.62	4.78	3.02	3.11	3.48	7.61	5.79	exportin-1-like isoform 2	gi|356543440|ref|XP_003540168.1|PREDICTED: exportin-1-like isoform 2 [Glycine max]
TR77774|c0_g1_i6	6.18	7.48	2.24	0	0	0	2.82	fatty acyl- reductase 3-like	gi|356542728|ref|XP_003539817.1|PREDICTED: fatty acyl-CoA reductase 3-like isoform 1 [Glycine max]
TR73785|c0_g1_i1	0	0.1	0.31	9.28	15.43	23.5	3.12	isoflavone 2 -hydroxylase-like	gi|356540926|ref|XP_003538935.1|PREDICTED: cytochrome P450 81D1-like [Glycine max]
TR75425|c0_g1_i2	0.13	0	0.31	2.11	7.37	10.5	1.58	cytochrome p450	gi|356540926|ref|XP_003538935.1|PREDICTED: cytochrome P450 81D1-like [Glycine max]
TR75425|c0_g1_i6	0	0	0.08	3.52	4.6	8.9	0.92	cytochrome p450	gi|356540926|ref|XP_003538935.1|PREDICTED: cytochrome P450 81D1-like [Glycine max]
TR79582|c0_g3_i8	2.79	2.05	3.53	4.75	2.23	5.93	5.91	copii coat assembly protein sec16	gi|356540520|ref|XP_003538736.1|PREDICTED: uncharacterized protein LOC100810562 [Glycine max]
TR64448|c0_g1_i3	3.19	3.17	1.74	2.65	3.15	3.19	5.22	regulator of g-protein signaling 1	gi|356540199|ref|XP_003538577.1|PREDICTED: uncharacterized protein LOC100813598 [Glycine max]
TR44290|c0_g1_i1	1.15	0.55	3.73	6.82	1.28	3.17	2.26	myb-related transcription factor	gi|356539820|ref|XP_003538391.1|PREDICTED: transcription factor MYB32-like [Glycine max]
TR79129|c4_g1_i1	3.7	3.62	4.82	6.67	6.89	5.67	3.75	serine threonine-protein phosphatase bsl3	gi|356539201|ref|XP_003538088.1|PREDICTED: serine/threonine-protein phosphatase BSL2-like [Glycine max]
TR73221|c0_g2_i1	4.07	3.12	2.87	0.86	2.42	2.39	5.6	isovaleryl- dehydrogenase	gi|356539122|ref|XP_003538049.1|PREDICTED: isovaleryl-CoA dehydrogenase 1, mitochondrial-like [Glycine max]
TR73221|c0_g3_i9	0.74	0.88	1.3	2.92	4.96	5.32	2.91	isovaleryl- dehydrogenase	gi|356539122|ref|XP_003538049.1|PREDICTED: isovaleryl-CoA dehydrogenase 1, mitochondrial-like [Glycine max]
TR57372|c0_g1_i1	303.63	134.14	306.89	292.56	297.28	222.04	237.89	protein	gi|356539066|ref|XP_003538021.1|PREDICTED: 60S ribosomal protein L23A-like [Glycine max]
Mj_1_GCCAAT_L005_R1_001_(paired)_trimmed_(paired)_contig_3827	7.12	5.32	12.72	6.79	9.25	5.94	11.25	dolichol phosphate-mannose biosynthesis regulatory protein	gi|356537234|ref|XP_003537134.1|PREDICTED: dolichol phosphate-mannose biosynthesis regulatory protein [Glycine max] gi|255632149|gb|ACU16428.1| unknown [Glycine max]
TR54011|c0_g1_i2	5.4	4.01	8.2	5.91	7.55	5.74	4.98	dolichol phosphate-mannose biosynthesis regulatory protein	gi|356537234|ref|XP_003537134.1|PREDICTED: dolichol phosphate-mannose biosynthesis regulatory protein [Glycine max] gi|255632149|gb|ACU16428.1| unknown [Glycine max]
Mj_1_GCCAAT_L005_R1_001_(paired)_trimmed_(paired)_contig_11003	10.74	10.03	19.16	28.98	26.83	35.25	24.63	pinus taeda anonymous locus 0_10618_01 genomic sequence	gi|356536435|ref|XP_003536743.1|PREDICTED: E3 ubiquitin-protein ligase CIP8-like isoform 1 [Glycine max] gi|356536437|ref|XP_003536744.1| PREDICTED: E3 ubiquitin-protein ligase CIP8-like isoform 2 [Glycine max]
TR79387|c1_g3_i5	4.38	7.41	6.37	1.63	1.53	0.57	8.61	na+ h+ antiporter precursor	gi|356536180|ref|XP_003536617.1|PREDICTED: uncharacterized protein LOC100779521 isoform 2 [Glycine max]
TR69524|c0_g1_i2	6.15	4.11	3.84	3.62	2.15	5.97	5.32	type i inositol- -trisphosphate 5-phosphatase cvp2-like	gi|356535991|ref|XP_003536524.1|PREDICTED: type I inositol-1,4,5-trisphosphate 5-phosphatase CVP2-like [Glycine max]
scaffold12080	15.55	12.52	42.07	16.65	18.12	11.15	13.01	serine decarboxylase	gi|356534053|ref|XP_003535572.1|PREDICTED: histidine decarboxylase-like [Glycine max]
Mj_1_GCCAAT_L005_R1_001_(paired)_trimmed_(paired)_contig_17112	6.52	18.66	4.76	114.54	67.14	263.45	21.1	heavy metal transport detoxification domain-containing protein	gi|356533189|ref|XP_003535150.1|PREDICTED: copper-transporting ATPase 2-like [Glycine max]
Mj_1_GCCAAT_L005_R1_001_(paired)_trimmed_(paired)_contig_1617	71.73	57.68	89.11	114.56	83.25	143.28	76.21	beta chain	gi|356533102|ref|XP_003535107.1|PREDICTED: tubulin beta-3 chain-like [Glycine max]
TR52405|c0_g1_i1	13.23	14.91	56.8	37.2	71.26	34.86	74.33	protein	gi|356532867|ref|XP_003534991.1|PREDICTED: uncharacterized protein At4g26485-like [Glycine max]
TR51819|c0_g1_i1	0.08	0.24	0	0.8	0	0.19	246.27	cationic peroxidase 1-like	gi|356532187|ref|XP_003534655.1|PREDICTED: cationic peroxidase 1-like [Glycine max]
Mj_1_GCCAAT_L005_R1_001_(paired)_trimmed_(paired)_contig_880	117.98	86.78	239.07	502.33	763.99	1621.67	387.89	ubiquitin-conjugating enzyme e2 28	gi|356532141|ref|XP_003534632.1|PREDICTED: ubiquitin-conjugating enzyme E2 28-like isoform 2 [Glycine max]
TR57727|c0_g1_i5	3.54	5.09	2.04	1.92	2.6	2.6	1.34	beta-amylase 7-like	gi|356532004|ref|XP_003534564.1|PREDICTED: beta-amylase 7-like [Glycine max]
TR51073|c0_g1_i1	47.69	30.9	53.88	40.15	53.36	29.91	41.78	dna-directed rna polymerase ii subunit rpb11	gi|356531671|ref|XP_003534400.1|PREDICTED: DNA-directed RNA polymerase II subunit RPB11 [Glycine max]
TR70554|c0_g2_i2	2.79	5.35	5.48	14.73	17.67	9	9.16	PREDICTED: uncharacterized protein LOC100804987	gi|356531471|ref|XP_003534301.1|PREDICTED: uncharacterized protein LOC100804987 [Glycine max]
TR73070|c0_g1_i8	6.86	2.75	1.91	6.61	10.02	7.54	14.62	nudix hydrolase	gi|356531134|ref|XP_003534133.1|PREDICTED: nudix hydrolase 4 [Glycine max] gi|255631614|gb|ACU16174.1| unknown [Glycine max]
Mj_1_GCCAAT_L005_R1_001_(paired)_trimmed_(paired)_contig_16514	4.86	4.48	10.43	15.6	18.71	13.02	12.86	n-acetylglucosaminyltransferase-like protein	gi|356530927|ref|XP_003534030.1|PREDICTED: exostosin-2-like [Glycine max]
TR62844|c0_g1_i2	3.51	2.52	6.91	11.4	12.25	7.74	9.69	n-acetylglucosaminyltransferase-like protein	gi|356530927|ref|XP_003534030.1|PREDICTED: exostosin-2-like [Glycine max]
TR64381|c1_g1_i1	5.13	4.09	12.32	17.77	18.94	12.44	15.96	n-acetylglucosaminyltransferase-like protein	gi|356530927|ref|XP_003534030.1|PREDICTED: exostosin-2-like [Glycine max]
C914707	10.67	8.04	23.64	11.25	12.09	11.22	12.75	protein	gi|356530830|ref|XP_003533983.1|PREDICTED: UPF0326 protein At4g17486-like [Glycine max]
TR76109|c2_g1_i4	4.03	3.09	6.85	4.27	5.36	6.97	4.42	protein	gi|356530830|ref|XP_003533983.1|PREDICTED: UPF0326 protein At4g17486-like [Glycine max]
TR67705|c1_g1_i2	10.6	8.44	20.17	11.23	12.5	10.98	10.18	probable sugar phosphate phosphate translocator at3g17430-like	gi|356530491|ref|XP_003533814.1|PREDICTED: probable sugar phosphate/phosphate translocator At3g17430-like [Glycine max]
TR67705|c1_g1_i4	7.3	5.55	14.09	8.91	7.22	6.34	7.47	probable sugar phosphate phosphate translocator at3g17430-like	gi|356530491|ref|XP_003533814.1|PREDICTED: probable sugar phosphate/phosphate translocator At3g17430-like [Glycine max]
TR67705|c2_g3_i3	5.87	5.2	12.84	7.53	8.17	6.56	6.47	probable sugar phosphate phosphate translocator at3g17430-like	gi|356530491|ref|XP_003533814.1|PREDICTED: probable sugar phosphate/phosphate translocator At3g17430-like [Glycine max]
TR69866|c0_g1_i1	20.9	6.53	13.68	4.32	4.98	2.15	8.27	protein	gi|356530401|ref|XP_003533770.1|PREDICTED: eukaryotic initiation factor 4A-15-like isoform 1 [Glycine max] gi|356530403|ref|XP_003533771.1| PREDICTED: eukaryotic initiation factor 4A-15-like isoform 2 [Glycine max]
TR77537|c2_g2_i7	1.25	1.1	1.25	4.45	9.25	0.75	1.24	glutamate receptor	gi|356529661|ref|XP_003533407.1|PREDICTED: glutamate receptor 3.6-like [Glycine max]
TR77328|c1_g2_i1	6.79	2.85	1.36	1.38	2.44	1.81	1.11	thioredoxin family protein	gi|356528320|ref|XP_003532752.1|PREDICTED: uncharacterized protein LOC100784488 [Glycine max]
TR77355|c2_g2_i6	8.03	2.7	1.53	0.34	1.94	0.72	0.21	thioredoxin family protein	gi|356528320|ref|XP_003532752.1|PREDICTED: uncharacterized protein LOC100784488 [Glycine max]
TR67594|c2_g1_i3	15.1	21.95	4.69	1.76	3.96	1.37	10.01	aldehyde dehydrogenase family 3 member h1	gi|356526936|ref|XP_003532071.1|PREDICTED: aldehyde dehydrogenase family 3 member I1, chloroplastic-like [Glycine max]
TR75443|c1_g2_i1	6.19	4.31	14.59	8.92	14.85	8.32	6.1	protein	gi|356526926|ref|XP_003532066.1|PREDICTED: uncharacterized protein LOC100798056 [Glycine max]
TR75443|c1_g2_i2	5.62	4.64	14.48	10.36	15.21	10.79	6.89	protein	gi|356526926|ref|XP_003532066.1|PREDICTED: uncharacterized protein LOC100798056 [Glycine max]
TR77333|c1_g1_i1	7.18	2.77	12.05	9.21	13.71	6.95	6.18	protein	gi|356526926|ref|XP_003532066.1|PREDICTED: uncharacterized protein LOC100798056 [Glycine max]
TR73455|c0_g1_i2	14.08	13.14	7.03	3.01	3.79	4.41	6.61	geminivirus rep-interacting motor	gi|356526755|ref|XP_003531982.1|PREDICTED: geminivirus Rep-interacting motor protein-like [Glycine max]
TR75060|c4_g1_i3	15.5	16.94	8.14	3.77	5.34	5.09	8.07	geminivirus rep-interacting motor	gi|356526755|ref|XP_003531982.1|PREDICTED: geminivirus Rep-interacting motor protein-like [Glycine max]
TR59512|c0_g1_i1	9.84	7.46	4.71	3.05	3	1.3	5.52	peptide deformylase 1a	gi|356526200|ref|XP_003531707.1|PREDICTED: peptide deformylase 1A, chloroplastic-like [Glycine max]
TR64634|c1_g1_i1	6.87	6.54	13.43	9.08	12.47	12.49	5.82	coatomer subunit beta -1	gi|356526153|ref|XP_003531684.1|PREDICTED: protein SYS1 homolog [Glycine max]
Mj_1_GCCAAT_L005_R1_001_(paired)_trimmed_(paired)_contig_11105	18.19	17.47	21.97	32.75	26.46	32.4	16.71	eukaryotic translation initiation factor 2 subunit 3	gi|356525780|ref|XP_003531501.1|PREDICTED: eukaryotic translation initiation factor 2 subunit 3 [Glycine max]
TR67775|c0_g1_i1	5.22	3.29	5.58	4.16	4.84	3.19	4.44	atp gtp binding protein	gi|356525529|ref|XP_003531377.1|PREDICTED: uncharacterized protein LOC100782686 [Glycine max]
TR67775|c0_g1_i6	3.94	3.07	5.98	3.88	2.69	3.11	3.25	atp gtp binding protein	gi|356525529|ref|XP_003531377.1|PREDICTED: uncharacterized protein LOC100782686 [Glycine max]
scaffold1075	3.76	1.9	5.15	2.08	4.03	2.31	3.34	protein	gi|356525529|ref|XP_003531377.1|PREDICTED: uncharacterized protein LOC100782686 [Glycine max]
TR60314|c4_g2_i5	4.62	2.77	5.55	3.98	4.59	2.68	4.48	nucleotide-sugar transporter family protein	gi|356525475|ref|XP_003531350.1|PREDICTED: UDP-N-acetylglucosamine transporter-like [Glycine max]
TR53121|c0_g1_i2	2.71	2.46	2	6.13	6.16	1.48	3.74	serine threonine-protein kinase sapk2-like isoform 1	gi|356525451|ref|XP_003531338.1|PREDICTED: serine/threonine-protein kinase SAPK2-like isoform 1 [Glycine max]
TR53121|c0_g1_i3	2.29	2.63	2.22	3.22	6.47	0.9	3.52	serine threonine-protein kinase sapk2-like isoform 1	gi|356525451|ref|XP_003531338.1|PREDICTED: serine/threonine-protein kinase SAPK2-like isoform 1 [Glycine max]
TR57721|c0_g1_i2	1.87	2.7	1.36	3.18	5.32	1.29	3.69	serine threonine-protein kinase sapk2-like	gi|356525451|ref|XP_003531338.1|PREDICTED: serine/threonine-protein kinase SAPK2-like isoform 1 [Glycine max]
TR65643|c0_g1_i2	2.92	3.1	8.37	3.58	3.12	3.03	6.32	udp-n-acetylglucosamine pyrophosphorylase	gi|356524976|ref|XP_003531103.1|PREDICTED: probable UDP-N-acetylglucosamine pyrophosphorylase-like [Glycine max]
TR66678|c0_g1_i11	3.14	2.84	7.38	3.67	2.28	2.74	4.6	udp-n-acetylglucosamine pyrophosphorylase	gi|356524976|ref|XP_003531103.1|PREDICTED: probable UDP-N-acetylglucosamine pyrophosphorylase-like [Glycine max]
TR66678|c0_g1_i3	4.92	3.88	11.18	5.73	3.11	2.97	7.44	udp-n-acetylglucosamine pyrophosphorylase	gi|356524976|ref|XP_003531103.1|PREDICTED: probable UDP-N-acetylglucosamine pyrophosphorylase-like [Glycine max]
TR66678|c0_g1_i6	4.56	4.51	7.53	4.72	2.31	3.17	6.44	udp-n-acetylglucosamine pyrophosphorylase	gi|356524976|ref|XP_003531103.1|PREDICTED: probable UDP-N-acetylglucosamine pyrophosphorylase-like [Glycine max]
TR66678|c0_g1_i8	4.31	3.7	9.71	6.05	3.07	2.43	7.27	udp-n-acetylglucosamine pyrophosphorylase	gi|356524976|ref|XP_003531103.1|PREDICTED: probable UDP-N-acetylglucosamine pyrophosphorylase-like [Glycine max]
TR72756|c0_g2_i1	30.01	15.95	26.13	18.93	26.65	18.42	30	at5g64160 mhj24_14	gi|356524842|ref|XP_003531037.1|PREDICTED: uncharacterized protein LOC100780521 [Glycine max]
TR73908|c1_g1_i1	12.32	9.49	13.02	29.34	23.25	30.32	20.44	protein topless	gi|356522325|ref|XP_003529797.1|PREDICTED: topless-related protein 1-like [Glycine max]
TR73908|c1_g1_i2	5.85	4.92	10.17	23.91	22.31	23.38	9.62	protein topless	gi|356522325|ref|XP_003529797.1|PREDICTED: topless-related protein 1-like [Glycine max]
TR73908|c1_g1_i4	8.24	8.29	10.4	25.94	24.66	25.34	12.49	protein topless	gi|356522325|ref|XP_003529797.1|PREDICTED: topless-related protein 1-like [Glycine max]
TR54586|c0_g1_i1	15.52	19.89	15.27	11.42	14.51	6.78	28.84	cytochrome p450	gi|356521096|ref|XP_003529194.1|PREDICTED: cytochrome P450 71D11-like [Glycine max]
Mj_1_GCCAAT_L005_R1_001_(paired)_trimmed_(paired)_contig_11556	6.66	3.86	3.67	1.63	2.73	2.07	2.5	protein	gi|356521038|ref|XP_003529165.1|PREDICTED: protein SCO1 homolog 1, mitochondrial-like [Glycine max]
TR71917|c0_g1_i2	5.04	3.33	5.76	2.12	2.42	2.03	3.04	sco1 protein	gi|356521038|ref|XP_003529165.1|PREDICTED: protein SCO1 homolog 1, mitochondrial-like [Glycine max]
Mj_1_GCCAAT_L005_R1_001_(paired)_trimmed_(paired)_contig_73152	0.35	0.22	40.73	22.56	2.11	46.44	0.35	protease inhibitor seed storage lipid transfer protein family protein	gi|356520960|ref|XP_003529127.1|PREDICTED: uncharacterized protein LOC100810277 [Glycine max]
TR76218|c3_g5_i2	0	0	0.99	3.21	0	13.29	0.17	wrky transcription factor 12	gi|356520758|ref|XP_003529027.1|PREDICTED: probable WRKY transcription factor 12-like [Glycine max]
TR75223|c0_g1_i2	5.08	4.13	3.68	3.17	4.88	4.53	3.86	dead-box atp-dependent rna helicase 13	gi|356520440|ref|XP_003528870.1|PREDICTED: DEAD-box ATP-dependent RNA helicase 13-like [Glycine max]
scaffold12697	7.39	6.5	6.63	10.4	8.37	16.58	8.69	cgs1 mrna stability	gi|356518240|ref|XP_003527787.1|PREDICTED: uncharacterized protein LOC100788511 [Glycine max]
TR72789|c0_g1_i2	9.99	5.64	14.49	12.02	9.3	9.06	6.88	hva22-like protein i	gi|356517980|ref|XP_003527662.1|PREDICTED: HVA22-like protein i-like [Glycine max]
TR77176|c0_g1_i1	6.75	7.32	13.01	6.71	6.32	6.99	11.47	kh domain-containing protein	gi|356517802|ref|XP_003527575.1|PREDICTED: KH domain-containing protein At5g56140-like [Glycine max]
scaffold13097	3.72	2.43	4.63	9.06	5.25	10.08	4.83	universal stress protein family protein	gi|356517215|ref|XP_003527284.1|PREDICTED: uncharacterized protein LOC100817735 [Glycine max]
Mj_1_GCCAAT_L005_R1_001_(paired)_trimmed_(paired)_contig_15455	7.82	9.18	20.09	15.78	18.04	19.31	20.84	signal recognition particle receptor subunit alpha	gi|356517002|ref|XP_003527179.1|PREDICTED: signal recognition particle receptor subunit alpha-like [Glycine max]
TR63074|c1_g1_i2	28.14	24.71	34.53	21.88	45.51	21.44	33.58	vacuolar protein sorting-associated protein 24 homolog 1-like	gi|356516916|ref|XP_003527138.1|PREDICTED: vacuolar protein sorting-associated protein 24 homolog 1-like [Glycine max]
TR57647|c0_g1_i1	16.49	15.72	11.97	5.77	10.11	13.39	5.73	saur family protein	gi|356516834|ref|XP_003527098.1|PREDICTED: auxin-induced protein 15A-like [Glycine max]
scaffold1100	12.24	10.32	6.1	0.33	2.47	0.69	1.23	saur family protein	gi|356516834|ref|XP_003527098.1|PREDICTED: auxin-induced protein 15A-like [Glycine max]
TR48421|c0_g1_i2	31.49	32.6	52.17	92.69	84.14	68.33	53.24	protein	gi|356516007|ref|XP_003526688.1|PREDICTED: ubiquitin-conjugating enzyme E2 10-like [Glycine max]
Mj_1_GCCAAT_L005_R1_001_(paired)_trimmed_(paired)_contig_9736	18.57	26.48	17.97	9.58	10.36	8.59	13.49	thylakoid-bound ascorbate peroxidase	gi|356515910|ref|XP_003526640.1|PREDICTED: L-ascorbate peroxidase T, chloroplastic-like isoform 2 [Glycine max]
TR60767|c0_g1_i1	39.87	50.36	37.78	25.19	21.63	24.12	32.96	thylakoid-bound ascorbate peroxidase	gi|356515910|ref|XP_003526640.1|PREDICTED: L-ascorbate peroxidase T, chloroplastic-like isoform 2 [Glycine max]
TR60767|c0_g1_i2	50.91	65.62	38.97	24.73	21.61	24.07	35.48	thylakoid-bound ascorbate peroxidase	gi|356515910|ref|XP_003526640.1|PREDICTED: L-ascorbate peroxidase T, chloroplastic-like isoform 2 [Glycine max]
TR69653|c0_g1_i4	0.85	0.68	1.84	4.07	5.11	5.06	2.95	mads box interactor-like	gi|356515696|ref|XP_003526534.1|PREDICTED: uncharacterized protein LOC100817903 [Glycine max]
TR60359|c0_g1_i1	48.86	56.39	42.02	14	21.36	10.26	30.93	probable protein pop3-like	gi|356515595|ref|XP_003526484.1|PREDICTED: probable protein Pop3-like [Glycine max]
TR60359|c0_g1_i2	75.29	80.36	66.52	18.97	22.51	9.82	50.35	probable protein pop3-like	gi|356515595|ref|XP_003526484.1|PREDICTED: probable protein Pop3-like [Glycine max]
TR63043|c0_g1_i1	23.83	16.96	14.41	24.57	21.17	27.81	19.37	transcriptional corepressor leunig	gi|356515484|ref|XP_003526430.1|PREDICTED: transcriptional corepressor LEUNIG-like [Glycine max]
TR64556|c0_g1_i3	6.32	7.14	2.25	1.21	1.14	0.42	3.39	protein	gi|356514733|ref|XP_003526058.1|PREDICTED: uncharacterized protein LOC100787776 [Glycine max]
TR64556|c0_g1_i4	7.24	10.6	2.76	1.01	3.49	0.71	2.72	protein	gi|356514733|ref|XP_003526058.1|PREDICTED: uncharacterized protein LOC100787776 [Glycine max]
scaffold14258	4.12	4.42	4.1	4.63	3.93	4.65	6.94	aspartyl protease family protein	gi|356514298|ref|XP_003525843.1|PREDICTED: aspartic proteinase-like protein 1-like [Glycine max]
TR75084|c2_g4_i1	9.02	6.86	8.3	5.15	9.28	5.95	9.32	zinc finger c-x8-c-x5-c-x3-h type family protein	gi|356513935|ref|XP_003525663.1|PREDICTED: zinc finger CCCH domain-containing protein 34-like [Glycine max]
TR39082|c0_g1_i1	260.06	280.6	33.04	64.95	42.82	50.9	64.05	elongation factor chloroplastic-like	gi|356513781|ref|XP_003525588.1|PREDICTED: elongation factor Tu, chloroplastic-like [Glycine max]
TR72754|c2_g5_i2	2.53	0.97	3.88	4.81	4.52	5.88	2.74	e3 ubiquitin-protein ligase sis3-like	gi|356513598|ref|XP_003525499.1|PREDICTED: E3 ubiquitin-protein ligase SIS3-like [Glycine max]
scaffold14311	11.78	4.19	4.05	0.11	0.52	0	10.62	d-cysteine desulfhydrase	gi|356512946|ref|XP_003525175.1|PREDICTED: putative 1-aminocyclopropane-1-carboxylate deaminase-like [Glycine max]
TR59525|c0_g1_i1	47.13	40.39	61.32	64.39	91.39	58.09	44.07	af385728_1at3g47831 t23j7	gi|356512833|ref|XP_003525120.1|PREDICTED: uncharacterized protein LOC100527671 [Glycine max]
Mj_1_GCCAAT_L005_R1_001_(paired)_trimmed_(paired)_contig_1991	14.18	1.74	11.46	3.07	2.6	2.7	9.28	ribonucleoside-diphosphate reductase large subunit	gi|356512785|ref|XP_003525096.1|PREDICTED: ribonucleoside-diphosphate reductase large subunit [Glycine max] gi|27261142|gb|AAN87547.1|AF118784_1 ribonucleotide reductase large subunit A [Glycine max]
TR73003|c0_g3_i1	11.87	9.8	18.02	9.9	4.63	3.5	8.89	nad -binding rossmann-fold-containing protein	gi|356512181|ref|XP_003524799.1|PREDICTED: uncharacterized protein At2g34460, chloroplastic-like [Glycine max]
TR73003|c0_g3_i2	11.03	8.48	13.53	6.66	4.66	3.41	8.95	nad -binding rossmann-fold-containing protein	gi|356512181|ref|XP_003524799.1|PREDICTED: uncharacterized protein At2g34460, chloroplastic-like [Glycine max]
TR56826|c0_g1_i2	0	0	0	5.64	10.31	0.72	0	ribulose-phosphate 3-epimerase	gi|356511994|ref|XP_003524706.1|PREDICTED: ribulose-phosphate 3-epimerase, chloroplastic-like [Glycine max]
TR68414|c0_g3_i2	4.05	3.9	4.94	4.84	4.08	6.29	3.77	sphingoid long-chain bases kinase 1	gi|356511728|ref|XP_003524575.1|PREDICTED: sphingoid long-chain bases kinase 1-like [Glycine max]
TR68827|c0_g2_i2	6.28	5.85	7.91	8.9	6.42	8.32	6.24	sphingoid long-chain bases kinase 1	gi|356511728|ref|XP_003524575.1|PREDICTED: sphingoid long-chain bases kinase 1-like [Glycine max]
TR68827|c0_g2_i4	2.22	2.52	2.03	3.73	2.13	5.57	2.5	sphingoid long-chain bases kinase 1	gi|356511728|ref|XP_003524575.1|PREDICTED: sphingoid long-chain bases kinase 1-like [Glycine max]
scaffold12709	4.01	3.01	4.41	5.29	4.03	5.7	3.82	sphingoid long-chain bases kinase 1	gi|356511728|ref|XP_003524575.1|PREDICTED: sphingoid long-chain bases kinase 1-like [Glycine max]
Mj_1_GCCAAT_L005_R1_001_(paired)_trimmed_(paired)_contig_8846	28.98	36.42	6.99	27.63	27.72	38.38	14.84	peptidase m1 family protein	gi|356511482|ref|XP_003524455.1|PREDICTED: aminopeptidase N-like [Glycine max]
TR70399|c1_g4_i5	8.72	5.5	3.28	2.35	3.32	2.67	3.29	carbon catabolite repressor protein 4-like 3	gi|356511339|ref|XP_003524384.1|PREDICTED: carbon catabolite repressor protein 4 homolog 3-like [Glycine max]
TR65765|c0_g3_i2	3	1.66	4.11	2.77	5.67	1.62	3.16	PREDICTED: uncharacterized protein LOC100814166	gi|356511299|ref|XP_003524364.1|PREDICTED: uncharacterized protein LOC100814166 [Glycine max]
TR77355|c2_g2_i3	6.4	2.96	0.24	0	0.62	0.46	1.02	thioredoxin family protein	gi|356510961|ref|XP_003524201.1|PREDICTED: uncharacterized protein LOC100805437 [Glycine max]
TR52075|c0_g1_i2	11.61	11.61	38.56	23.26	38.46	28.09	24.13	protein	gi|356510600|ref|XP_003524025.1|PREDICTED: sorcin-like isoform 1 [Glycine max]
TR77301|c0_g1_i1	5	5.04	8.48	4.81	4.92	5.88	6.72	kh domain-containing protein	gi|356508160|ref|XP_003522828.1|PREDICTED: KH domain-containing protein At5g56140-like [Glycine max]
TR60138|c0_g1_i1	2.01	2.51	3.55	6	5.38	4.69	6.95	monoglyceride lipase	gi|356507933|ref|XP_003522717.1|PREDICTED: monoglyceride lipase-like [Glycine max]
TR60138|c0_g1_i3	12.22	16.09	8.94	3.75	4.66	2.4	11.72	monoglyceride lipase	gi|356507933|ref|XP_003522717.1|PREDICTED: monoglyceride lipase-like [Glycine max]
TR77384|c1_g2_i1	2.18	2.67	2.42	4.07	4.87	4.31	6.53	monoglyceride lipase	gi|356507933|ref|XP_003522717.1|PREDICTED: monoglyceride lipase-like [Glycine max]
Mj_1_GCCAAT_L005_R1_001_(paired)_trimmed_(paired)_contig_2644	64.26	48.18	69.08	69.26	53.48	62.53	46.17	eukaryotic translation initiation factor 3 subunit l-like	gi|356507889|ref|XP_003522695.1|PREDICTED: eukaryotic translation initiation factor 3 subunit L-like [Glycine max]
TR59648|c0_g1_i1	2.66	2.54	5.27	4	8.38	5.6	7.59	PREDICTED: uncharacterized protein LOC100807540	gi|356506934|ref|XP_003522228.1|PREDICTED: uncharacterized protein LOC100807540 [Glycine max]
TR59648|c0_g1_i2	4.26	4.06	9.31	8.51	16.04	8.39	12.13	PREDICTED: uncharacterized protein LOC100807540	gi|356506934|ref|XP_003522228.1|PREDICTED: uncharacterized protein LOC100807540 [Glycine max]
TR59648|c0_g1_i3	6.71	7.78	15.95	12.01	21.01	11.6	16.21	PREDICTED: uncharacterized protein LOC100807540	gi|356506934|ref|XP_003522228.1|PREDICTED: uncharacterized protein LOC100807540 [Glycine max]
TR59648|c0_g1_i4	4.11	6.94	12.72	10.27	18.65	10.32	15.41	PREDICTED: uncharacterized protein LOC100807540	gi|356506934|ref|XP_003522228.1|PREDICTED: uncharacterized protein LOC100807540 [Glycine max]
TR63332|c0_g1_i1	50.32	32.84	9.93	5.85	3.95	4.28	12.3	rna-binding protein cp33	gi|356505441|ref|XP_003521499.1|PREDICTED: 33 kDa ribonucleoprotein, chloroplastic-like [Glycine max]
scaffold13435	31.21	21.32	4.71	4.04	2	2.68	7.91	rna-binding protein cp33	gi|356505441|ref|XP_003521499.1|PREDICTED: 33 kDa ribonucleoprotein, chloroplastic-like [Glycine max]
TR71869|c0_g1_i3	5.1	6.24	7.18	4.58	4.58	4.64	6.78	wd repeat-containing protein 20-like	gi|356505212|ref|XP_003521386.1|PREDICTED: WD repeat-containing protein 20-like [Glycine max]
TR71872|c0_g1_i3	5.88	6.11	6.16	5.4	3.72	4.21	8.77	transducin wd-40 repeat-containing protein	gi|356505212|ref|XP_003521386.1|PREDICTED: WD repeat-containing protein 20-like [Glycine max]
TR59413|c0_g1_i2	4.9	3.21	6.61	11.37	10.41	18.98	4.94	eto1-like protein 1-like	gi|356504961|ref|XP_003521261.1|PREDICTED: ETO1-like protein 1-like [Glycine max]
TR75040|c0_g1_i2	5.68	5.59	8.55	17.94	10.62	28.64	6.53	eto1-like protein 1-like	gi|356504961|ref|XP_003521261.1|PREDICTED: ETO1-like protein 1-like [Glycine max]
TR66828|c0_g1_i1	18.7	5.32	19.26	25.91	12.65	28.09	8.29	anthranilate phosphoribosyltransferase-like protein	gi|356504837|ref|XP_003521201.1|PREDICTED: multiple C2 and transmembrane domain-containing protein 2-like isoform 1 [Glycine max] gi|356504839|ref|XP_003521202.1| PREDICTED: multiple C2 and transmembrane domain-containing protein 2-like isoform 2 [Glycine max]
TR79693|c0_g1_i3	2.11	2.02	1.78	5.03	5.19	7.2	2.53	dna-binding protein smubp-2-like	gi|356504807|ref|XP_003521186.1|PREDICTED: DNA-binding protein SMUBP-2-like [Glycine max]
TR68756|c0_g3_i7	0.32	0	3.82	3.44	0	16.03	0.38	wrky transcription factor 12	gi|356504553|ref|XP_003521060.1|PREDICTED: probable WRKY transcription factor 12-like [Glycine max]
TR66695|c1_g5_i1	83.35	53.73	186.14	101.68	169.28	131.31	113.51	40s ribosomal protein s28	gi|356503875|ref|XP_003520726.1|PREDICTED: 40S ribosomal protein S28-like [Glycine max]
TR79355|c2_g1_i1	5.99	4.22	5.22	2.58	3.42	4.14	4.32	cell division control protein	gi|356502624|ref|XP_003520118.1|PREDICTED: cell division control protein 48 homolog B-like [Glycine max]
Mj_1_GCCAAT_L005_R1_001_(paired)_trimmed_(paired)_contig_21948	3.76	2.3	4.11	2.34	3.82	1.04	5.82	auxilin-related protein 2-like	gi|356502169|ref|XP_003519893.1|PREDICTED: auxilin-related protein 1-like [Glycine max]
TR1140|c0_g1_i1	0.13	0	0.31	0	0	5.87	0	chlorophyll a-b binding protein	gi|356501755|ref|XP_003519689.1|PREDICTED: chlorophyll a-b binding protein 3, chloroplastic-like [Glycine max]
scaffold12516	2.56	1.28	3.52	10.99	10.66	3.98	1.24	rhamnogalacturonate lyase-like protein	gi|356500777|ref|XP_003519207.1|PREDICTED: rhamnogalacturonate lyase B-like [Glycine max]
TR77354|c5_g1_i3	3.09	4.91	10.18	5.2	4.74	6.27	8.5	beta-hexosaminidase subunit b2-like	gi|356499675|ref|XP_003518662.1|PREDICTED: beta-hexosaminidase subunit B2-like [Glycine max]
TR72911|c0_g1_i1	11.68	5.51	15.17	12.48	14.88	18.98	15.76	protein	gi|356499663|ref|XP_003518656.1|PREDICTED: uncharacterized protein LOC100787520 [Glycine max]
TR58967|c0_g1_i1	22.18	19.08	40.59	24.29	24.23	21.93	28.68	ras-related protein rabe1c-like	gi|356499659|ref|XP_003518654.1|PREDICTED: ras-related protein RABE1c-like [Glycine max]
Mj_1_GCCAAT_L005_R1_001_(paired)_trimmed_(paired)_contig_10105	11.52	18.32	6.36	0.38	0.36	0.4	3.79	protein	gi|356499538|ref|XP_003518596.1|PREDICTED: trans-2,3-enoyl-CoA reductase-like [Glycine max]
Mj_1_GCCAAT_L005_R1_001_(paired)_trimmed_(paired)_contig_19029	21.48	34.97	33.89	6.9	9.59	3.43	38.45	protein	gi|356499538|ref|XP_003518596.1|PREDICTED: trans-2,3-enoyl-CoA reductase-like [Glycine max]
TR51811|c1_g1_i1	8.63	12.02	2.76	0	0.22	0.32	1.59	protein	gi|356499538|ref|XP_003518596.1|PREDICTED: trans-2,3-enoyl-CoA reductase-like [Glycine max]
scaffold10775	7.61	13.77	11.45	1.67	4.73	1.64	19.57	protein	gi|356499538|ref|XP_003518596.1|PREDICTED: trans-2,3-enoyl-CoA reductase-like [Glycine max]
Mj_1_GCCAAT_L005_R1_001_(paired)_trimmed_(paired)_contig_30971	3.54	4.13	8.46	2.51	2.07	2.3	2.62	glucan endo- -beta-glucosidase-like protein	gi|356499352|ref|XP_003518505.1|PREDICTED: glucan endo-1,3-beta-glucosidase-like protein 1-like [Glycine max]
scaffold12262	1.46	2.94	5.08	2.21	1.27	1.55	1.68	glucan endo- -beta-glucosidase-like protein	gi|356499352|ref|XP_003518505.1|PREDICTED: glucan endo-1,3-beta-glucosidase-like protein 1-like [Glycine max]
TR58221|c0_g1_i1	47.46	41.91	68.69	55.83	53.52	68.73	41.9	eukaryotic peptide chain release factor subunit 1-3-like	gi|356498653|ref|XP_003518164.1|PREDICTED: eukaryotic peptide chain release factor subunit 1-3-like [Glycine max]
C920728	6.92	5.08	5.16	6.93	5.49	5.1	14.52	pyruvate cytosolic isozyme-like	gi|356498397|ref|XP_003518039.1|PREDICTED: probable pyruvate kinase, cytosolic isozyme-like [Glycine max]
TR74100|c1_g1_i1	1.12	1.06	1.78	5.69	5.8	6.8	4.06	actin cross-linking protein	gi|356498130|ref|XP_003517906.1|PREDICTED: uncharacterized protein LOC100811752 [Glycine max]
TR74100|c1_g1_i3	1.12	0.9	2.69	6.74	6.62	8.77	4.82	actin cross-linking protein	gi|356498130|ref|XP_003517906.1|PREDICTED: uncharacterized protein LOC100811752 [Glycine max]
TR74100|c1_g1_i7	1.02	1.18	2.66	8.96	7.66	9.19	5.3	actin cross-linking protein	gi|356498130|ref|XP_003517906.1|PREDICTED: uncharacterized protein LOC100811752 [Glycine max]
TR71666|c0_g1_i1	23.73	16.27	4.67	2.53	5.53	6.38	7.95	endoribonuclease e-like protein	gi|356497669|ref|XP_003517682.1|PREDICTED: uncharacterized protein At4g37920, chloroplastic-like [Glycine max]
TR71666|c0_g1_i3	28.74	21.35	7.27	4.3	6.04	9.04	10.97	endoribonuclease e-like protein	gi|356497669|ref|XP_003517682.1|PREDICTED: uncharacterized protein At4g37920, chloroplastic-like [Glycine max]
TR60516|c2_g2_i2	5.26	1.56	7.03	3.49	3.05	4.83	0.7	mads-box protein svp	gi|356497113|ref|XP_003517407.1|PREDICTED: MADS-box protein SVP-like [Glycine max]
TR70931|c1_g1_i4	7.82	10.08	6.91	2.28	7.42	6.23	17.88	protein	gi|356496961|ref|XP_003517333.1|PREDICTED: uncharacterized protein At2g23090 [Glycine max]
TR69248|c0_g1_i3	4.25	5.41	1.18	1.2	2.07	1.05	1.48	protein	gi|356496878|ref|XP_003517292.1|PREDICTED: methionine aminopeptidase 1D, chloroplastic/mitochondrial-like [Glycine max]
scaffold13087	9.06	4.45	7.19	10.33	6.8	7.15	7.53	hydroxyproline-rich glycoprotein family protein	gi|356496828|ref|XP_003517267.1|PREDICTED: uncharacterized protein LOC100776992 [Glycine max]
TR77224|c0_g1_i5	9.69	14.27	15.92	17.7	24.18	18.81	19.39	protein da1-related 1-like	gi|356496816|ref|XP_003517261.1|PREDICTED: protein DA1-related 1-like isoform 2 [Glycine max]
Mj_1_GCCAAT_L005_R1_001_(paired)_trimmed_(paired)_contig_19132	2.01	6.01	4.73	15.86	7.83	39.05	9.13	zinc finger protein	gi|356496771|ref|XP_003517239.1|PREDICTED: uncharacterized protein LOC100806404 [Glycine max]
TR74654|c0_g1_i5	1.8	3.39	4.91	5.28	6.17	5.43	3.2	mlo-like protein	gi|356496539|ref|XP_003517124.1|PREDICTED: MLO-like protein 8-like isoform 2 [Glycine max]
TR74654|c0_g1_i6	1.99	3.34	5.63	5.2	5.67	4.29	3.23	mlo-like protein	gi|356496539|ref|XP_003517124.1|PREDICTED: MLO-like protein 8-like isoform 2 [Glycine max]
TR64320|c0_g1_i2	10.03	10.18	19.59	12.9	16.51	12.84	13.43	protein	gi|356496342|ref|XP_003517027.1|PREDICTED: uncharacterized membrane protein At4g09580-like [Glycine max]
TR67103|c4_g4_i3	3.86	3.48	5.07	1.79	0.34	1.25	5.13	protein transport protein sec61 subunit beta	gi|356496312|ref|XP_003517012.1|PREDICTED: protein transport protein Sec61 subunit beta [Glycine max] gi|356506563|ref|XP_003522049.1| PREDICTED: protein transport protein Sec61 subunit beta-like [Glycine max] gi|255630067|gb|ACU15387.1| unknown [Glycine max]
TR70512|c0_g1_i1	23.49	52.44	41.36	58.27	50.62	18.19	77.56	probable nitrite transporter at1g68570-like	gi|356495939|ref|XP_003516828.1|PREDICTED: probable nitrite transporter At1g68570-like [Glycine max]
TR76490|c0_g1_i2	9.8	6.16	9.16	12.48	11.24	11.17	6.96	elongation factor g	gi|356495893|ref|XP_003516805.1|PREDICTED: elongation factor G, mitochondrial-like [Glycine max]
TR72680|c0_g2_i1	0.34	2.77	0.72	2.08	1.79	5.09	1.33	serine threonine kinase	gi|356495657|ref|XP_003516691.1|PREDICTED: uncharacterized protein LOC100813707 [Glycine max]
TR67104|c1_g3_i4	3.16	2.52	4.65	0.42	7.04	1.45	7.24	metacaspase 9	gi|356463704|gb|AET08890.1|metacaspase 9 [Aegilops speltoides]
TR75014|c1_g3_i4	3.28	3.32	3.63	1.53	3.74	5.13	4.37	metacaspase 9	gi|356463704|gb|AET08890.1|metacaspase 9 [Aegilops speltoides]
C951890	0	0.11	0	0.57	0	14.72	0	chlorophyll a b binding protein	gi|3560529|gb|AAC34983.1|light harvesting chlorophyll A/B binding protein [Prunus persica]
TR70180|c0_g1_i1	2.69	2.46	0.24	0	0	0	24.27	agamous-like protein	gi|354683684|gb|AER34989.1|AGAMOUS-like protein [Mangifera indica]
TR70180|c0_g1_i5	2.06	1.96	0.53	0.14	0.67	0	29.95	agamous-like protein	gi|354683684|gb|AER34989.1|AGAMOUS-like protein [Mangifera indica]
TR70180|c1_g1_i2	2.97	2.27	0.34	0.23	0.43	0.08	28.81	agamous-like protein	gi|354683684|gb|AER34989.1|AGAMOUS-like protein [Mangifera indica]
TR70180|c1_g1_i4	2.77	2.02	0.1	0.13	0.24	0	29.22	agamous-like protein	gi|354683684|gb|AER34989.1|AGAMOUS-like protein [Mangifera indica]
scaffold12428	2.46	1.33	0.13	0.17	0.16	0	17.1	agamous-like protein	gi|354683684|gb|AER34989.1|AGAMOUS-like protein [Mangifera indica]
TR56309|c0_g1_i1	1109.8	3345.62	271.02	51.29	70.08	32.16	478.05	plastidic aldolase	gi|354464671|gb|AER26531.1|fructose 1,6 bisphosphate aldolase class 1 [Carica papaya]
TR55893|c0_g1_i2	0	0.07	0.13	7.95	2.92	10.9	0.62	beta-amyrin synthase	gi|353678016|sp|A8CDT2.1|BAS_BRUGYRecName: Full=Beta-amyrin synthase; Short=BgbAS gi|157679391|dbj|BAF80443.1| beta amyrin synthase [Bruguiera gymnorhiza]
TR55893|c0_g1_i4	0.07	0	0.09	6.32	3.43	8.78	0.33	beta-amyrin synthase	gi|353678016|sp|A8CDT2.1|BAS_BRUGYRecName: Full=Beta-amyrin synthase; Short=BgbAS gi|157679391|dbj|BAF80443.1| beta amyrin synthase [Bruguiera gymnorhiza]
TR55893|c0_g1_i9	0.04	0.04	0.14	6.19	3.27	9.41	0.38	beta-amyrin synthase	gi|353678016|sp|A8CDT2.1|BAS_BRUGYRecName: Full=Beta-amyrin synthase; Short=BgbAS gi|157679391|dbj|BAF80443.1| beta amyrin synthase [Bruguiera gymnorhiza]
TR67868|c0_g1_i5	2.82	3.14	4.07	6.79	5.68	6	6.58	alpha-galactosidase	gi|353441550|gb|AEQ94270.1|alpha galacdosidase 3 [Cucumis sativus]
TR62266|c0_g1_i2	3.36	4.07	5.39	3.89	6.61	3.95	5.37	sand family protein	gi|353259719|gb|AEQ75498.1|SAND family protein [Rosa multiflora]
TR48268|c0_g1_i1	0.26	0.13	0.62	18.12	24.14	1.89	5.43	s-norcoclaurine synthase-like	gi|351727799|ref|NP_001237429.1|uncharacterized protein LOC100305838 [Glycine max] gi|255626741|gb|ACU13715.1| unknown [Glycine max]
TR64167|c0_g3_i1	0.71	0.97	2.15	4.2	8.98	6.78	2.61	fad nad binding	gi|351727751|ref|NP_001235124.1|uncharacterized protein LOC100306443 [Glycine max] gi|356509220|ref|XP_003523349.1| PREDICTED: protein yippee-like At4g27745-like [Glycine max] gi|255628561|gb|ACU14625.1| unknown [Glycine max]
TR67321|c1_g1_i2	1.62	1.83	3.3	3.28	5.07	3.77	3.34	ubiquitin carboxyl-terminal partial	gi|351727152|ref|NP_001236383.1|uncharacterized protein LOC100305765 [Glycine max] gi|255626553|gb|ACU13621.1| unknown [Glycine max]
TR52729|c0_g1_i1	2.46	1.72	7.53	1.82	3.18	1.64	2.58	actin-related protein 2 3 complex subunit 4-like	gi|351726864|ref|NP_001236629.1|uncharacterized protein LOC100527736 [Glycine max] gi|255633080|gb|ACU16895.1| unknown [Glycine max]
Mj_1_GCCAAT_L005_R1_001_(paired)_trimmed_(paired)_contig_2994	165.11	70.86	216.9	186.96	225.08	197.46	187.89	60s ribosomal protein	gi|351726632|ref|NP_001237389.1|uncharacterized protein LOC100527275 [Glycine max] gi|255631934|gb|ACU16334.1| unknown [Glycine max]
TR53084|c0_g1_i1	127.63	62.27	167.97	147.33	192.56	170.02	150	60s ribosomal protein	gi|351726632|ref|NP_001237389.1|uncharacterized protein LOC100527275 [Glycine max] gi|255631934|gb|ACU16334.1| unknown [Glycine max]
TR48421|c0_g1_i1	43.38	50.02	81.5	129.07	123.03	116.65	82.02	protein	gi|351726353|ref|NP_001235332.1|uncharacterized protein LOC100305945 [Glycine max] gi|224058407|ref|XP_002299494.1| predicted protein [Populus trichocarpa] gi|225426040|ref|XP_002274274.1| PREDICTED: ubiquitin-conjugating enzyme E2-17 kDa-like isoform 1 [Vitis vinifera] gi|225462705|ref|XP_002267153.1| PREDICTED: ubiquitin-conjugating enzyme E2-17 kDa-like [Vitis vinifera] gi|356573195|ref|XP_003…
scaffold14293	16.82	19.04	32.23	51.97	48.29	41.63	28.32	protein	gi|351726353|ref|NP_001235332.1|uncharacterized protein LOC100305945 [Glycine max] gi|224058407|ref|XP_002299494.1| predicted protein [Populus trichocarpa] gi|225426040|ref|XP_002274274.1| PREDICTED: ubiquitin-conjugating enzyme E2-17 kDa-like isoform 1 [Vitis vinifera] gi|225462705|ref|XP_002267153.1| PREDICTED: ubiquitin-conjugating enzyme E2-17 kDa-like [Vitis vinifera] gi|356573195|ref|XP_003…
TR75097|c0_g1_i1	14.45	6.82	18.34	15.17	19.33	16.01	8.88	nucleolar protein family a member 2	gi|351726206|ref|NP_001235327.1|uncharacterized protein LOC100499993 [Glycine max] gi|255628377|gb|ACU14533.1| unknown [Glycine max]
TR62381|c1_g1_i1	3.75	3.21	10.97	7.8	7.06	3.85	9.87	protein	gi|351725865|ref|NP_001237875.1|uncharacterized protein LOC100306121 [Glycine max] gi|255627617|gb|ACU14153.1| unknown [Glycine max]
Mj_1_GCCAAT_L005_R1_001_(paired)_trimmed_(paired)_contig_11035	3.29	24.47	7.1	1.16	2.73	0.2	1.44	cytoplasmic dynein light	gi|351725823|ref|NP_001236082.1|uncharacterized protein LOC100527181 [Glycine max] gi|255631730|gb|ACU16232.1| unknown [Glycine max]
TR54203|c0_g1_i1	128.18	54.19	209.86	74.73	84.19	73.71	113.75	cyclin-dependent kinases regulatory subunit	gi|351725771|ref|NP_001237104.1|cyclin-dependent kinases regulatory subunit [Glycine max] gi|356542684|ref|XP_003539796.1| PREDICTED: cyclin-dependent kinases regulatory subunit 2-like [Glycine max] gi|42362268|gb|AAS13367.1| cyclin-dependent kinases regulatory subunit [Glycine max] gi|255628843|gb|ACU14766.1| unknown [Glycine max] gi|388501782|gb|AFK38957.1| unknown [Lotus japonicus]
TR57287|c2_g1_i1	11.5	7.44	54.44	46.09	39.77	52.89	36.32	glycine cleavage system h protein	gi|351725115|ref|NP_001237081.1|uncharacterized protein LOC100305815 [Glycine max] gi|255626687|gb|ACU13688.1| unknown [Glycine max]
TR68645|c0_g2_i6	0.45	0.14	0.53	5.77	4.53	0.67	7.31	xyloglucan endotransglucosylase hydrolase	gi|351724937|ref|NP_001237075.1|syringolide-induced protein 19-1-5 precursor [Glycine max] gi|19911573|dbj|BAB86890.1| syringolide-induced protein 19-1-5 [Glycine max]
TR64267|c1_g1_i3	12.82	9.39	12.4	11.6	13.57	14.17	17.31	rna-binding (rrm rbd rnp motifs) family protein	gi|351724785|ref|NP_001238605.1|uncharacterized protein LOC100527350 [Glycine max] gi|255632145|gb|ACU16425.1| unknown [Glycine max]
TR64267|c1_g1_i4	13.65	10.97	11.22	13.47	14.56	13.4	17.32	rna-binding (rrm rbd rnp motifs) family protein	gi|351724785|ref|NP_001238605.1|uncharacterized protein LOC100527350 [Glycine max] gi|255632145|gb|ACU16425.1| unknown [Glycine max]
Mj_1_GCCAAT_L005_R1_001_(paired)_trimmed_(paired)_contig_20165	13.26	12.3	20.98	26.32	24.04	29.36	14.46	ubiquitin-conjugating enzyme e2 7	gi|351724365|ref|NP_001237055.1|uncharacterized protein LOC100305813 [Glycine max] gi|255626685|gb|ACU13687.1| unknown [Glycine max]
TR70405|c0_g1_i1	19.72	15.11	38.79	44.06	35.91	50.29	20.58	ubiquitin-conjugating enzyme e2 7	gi|351724365|ref|NP_001237055.1|uncharacterized protein LOC100305813 [Glycine max] gi|255626685|gb|ACU13687.1| unknown [Glycine max]
TR54136|c0_g1_i1	74.16	6.83	59.6	39.8	36.21	39.45	37.22	histone h2a	gi|351724209|ref|NP_001235770.1|uncharacterized protein LOC100305465 [Glycine max] gi|255625587|gb|ACU13138.1| unknown [Glycine max]
C944840	110.51	66.87	197.69	150.11	190.66	185.2	121.13	elongation factor 1-beta	gi|351724085|ref|NP_001238069.1|uncharacterized protein LOC100306132 [Glycine max] gi|255627641|gb|ACU14165.1| unknown [Glycine max]
TR70021|c0_g1_i3	9.81	8.15	8.12	4.19	5.52	4.68	12.52	malonyl- :acyl carrier protein transacylase	gi|351723705|ref|NP_001238312.1|malonyltransferase [Glycine max] gi|82618886|gb|ABB85235.1| malonyltransferase [Glycine max]
TR64452|c0_g2_i7	2.92	2.61	5.52	4.79	4.12	4.04	3.76	rab5-interacting family protein	gi|351723465|ref|NP_001236256.1|uncharacterized protein LOC100526939 [Glycine max] gi|255631191|gb|ACU15961.1| unknown [Glycine max]
TR52400|c0_g1_i1	25.14	22.56	52.92	26.04	26.38	15.64	31.67	dynein light chain cytoplasmic-like	gi|351723219|ref|NP_001238295.1|uncharacterized protein LOC100527842 [Glycine max] gi|255633354|gb|ACU17034.1| unknown [Glycine max]
TR63813|c0_g1_i4	4.54	2.96	5.08	5.46	6.47	3.7	5.57	nac domain protein	gi|351722859|ref|NP_001234955.1|uncharacterized protein LOC100527616 precursor [Glycine max] gi|255632782|gb|ACU16744.1| unknown [Glycine max]
C958844	1.16	0.37	7.6	2.45	1.16	0.54	0.57	protein kinase 3	gi|351722755|ref|NP_001236743.1|protein kinase 3 [Glycine max] gi|310582|gb|AAB68961.1| protein kinase 3 [Glycine max]
TR75419|c3_g1_i1	85.28	52.17	146.26	81.52	124.99	76.06	98.39	40s ribosomal protein	gi|351722029|ref|NP_001235950.1|uncharacterized protein LOC100499781 [Glycine max] gi|255626483|gb|ACU13586.1| unknown [Glycine max]
Mj_1_GCCAAT_L005_R1_001_(paired)_trimmed_(paired)_contig_11687	10.18	7.08	9.3	12.18	10.4	7.99	12.05	u6 snrna-associated sm-like protein lsm1	gi|351721438|ref|NP_001237465.1|uncharacterized protein LOC100306352 [Glycine max] gi|255628281|gb|ACU14485.1| unknown [Glycine max]
TR65236|c1_g1_i7	4.84	1.9	5.57	3.01	1.89	2.22	3.63	hit-type zinc finger protein	gi|351721106|ref|NP_001238734.1|uncharacterized protein LOC100527614 [Glycine max] gi|255632778|gb|ACU16742.1| unknown [Glycine max]
TR44967|c0_g1_i1	326.07	151.57	302.53	346.94	293.84	292.1	228.76	60s ribosomal protein l8	gi|350539037|ref|NP_001234115.1|60S ribosomal protein L8 [Solanum lycopersicum] gi|266944|sp|P29766.1|RL8_SOLLC RecName: Full=60S ribosomal protein L8; AltName: Full=L2; AltName: Full=Ribosomal protein TL2 gi|19343|emb|CAA45863.1| ribosomal protein L2 [Solanum lycopersicum]
TR84465|c0_g1_i1	1.09	5.02	4.69	0	0.27	1	3.39	a chain x-ray structural investigation of structure of acetate-ferrileghemoglobin at a resolution of angstroms	gi|350538955|ref|NP_001234111.1|non-symbiotic hemoglobin 2 [Solanum lycopersicum] gi|22001641|sp|Q941P9.1|HBL2_SOLLC RecName: Full=Non-symbiotic hemoglobin 2; AltName: Full=Hb2; AltName: Full=SOLly GLB2 gi|15809398|gb|AAK07677.1| non-symbiotic hemoglobin class 2 [Solanum lycopersicum]
TR56577|c3_g1_i1	6.45	9.65	23.81	6.28	12.49	6.35	14.16	v0 subunit e	gi|350538935|ref|NP_001234110.1|similar to ATP synthase subunit H protein precursor [Solanum lycopersicum] gi|62751089|dbj|BAD95792.1| similar to ATP synthase subunit H protein [Solanum lycopersicum]
TR64279|c0_g1_i5	4.12	5.46	0.95	1	3.76	1.1	1.77	stress regulated protein	gi|350537327|ref|NP_001233778.1|stress regulated protein [Solanum lycopersicum] gi|58198163|gb|AAW65813.1| stress regulated protein [Solanum lycopersicum]
TR63915|c1_g1_i5	6.53	3.83	2.66	1.79	2.07	2.51	4.21	bile acid na+ symporter family protein	gi|350537205|ref|NP_001234028.1|involved in inorganic sulfate assimilation [Solanum lycopersicum] gi|51457946|gb|AAU03362.1| putative anion:sodium symporter [Solanum lycopersicum]
TR72120|c0_g1_i3	1.32	2.22	0.96	16.45	11.45	4.78	3.11	metal-nicotianamine transporter ysl3	gi|350285881|gb|AEQ28192.1|yellow stripe-like protein 3 [Malus xiaojinensis]
Mj_1_GCCAAT_L005_R1_001_(paired)_trimmed_(paired)_contig_2068	14.75	14.16	15.27	5.82	5.96	6.52	11.16	yellow stripe-like protein	gi|350285879|gb|AEQ28191.1|yellow stripe-like protein 6 [Malus xiaojinensis]
TR59769|c0_g1_i1	1.75	0.26	0	0	0	0	27.92	alpha-farnesene synthase	gi|350284790|gb|AEQ27768.1|alpha-farnesene synthase [Ricinus communis]
TR59769|c0_g1_i2	0.12	0	0	0	0	0	13.26	alpha-farnesene synthase	gi|350284790|gb|AEQ27768.1|alpha-farnesene synthase [Ricinus communis]
Mj_1_GCCAAT_L005_R1_001_(paired)_trimmed_(paired)_contig_311	1.22	0.1	0.24	0.49	1.76	0	40.39	casbene chloroplast	gi|350284788|gb|AEQ27767.1|sesquiterpene synthase [Ricinus communis]
TR57445|c0_g1_i3	1.09	0.07	0.51	0.23	0.77	0	21	casbene chloroplast	gi|350284788|gb|AEQ27767.1|sesquiterpene synthase [Ricinus communis]
TR78353|c1_g4_i6	17.09	13.53	15.02	12.98	14.59	17.88	13.45	translationally controlled tumor protein	gi|349891716|gb|AEQ20639.1|translationally controlled tumor protein [Hevea brasiliensis]
TR56633|c0_g1_i2	1.62	1.03	2.54	10.52	6.67	7.96	1.2	ring-h2 finger protein	gi|349891714|gb|AEQ20638.1|RING-H2 zinc finger protein [Manihot esculenta]
TR56995|c1_g1_i1	3.09	1.48	0.91	8.27	11.25	9.42	1.71	ring-h2 finger protein	gi|349891714|gb|AEQ20638.1|RING-H2 zinc finger protein [Manihot esculenta]
C907612	0	0	0	0.45	0	5.62	0	glycine dehydrogenase	gi|349592199|gb|AEP95751.1|glycine decarboxylase complex subunit P [Cicer arietinum]
TR52657|c0_g1_i1	0	0	0	2.7	5.68	0.26	0	phosphoribulokinase precursor	gi|349585018|dbj|BAL03266.1|chloroplast phosphoribulokinase [Closterium peracerosum-strigosum-littorale complex]
Mj_1_GCCAAT_L005_R1_001_(paired)_trimmed_(paired)_contig_101225	0	0	0	0.1	7.16	0	0	chitin- domain 3	gi|347838402|emb|CCD52974.1|hypothetical protein [Botryotinia fuckeliana]
Mj_1_GCCAAT_L005_R1_001_(paired)_trimmed_(paired)_contig_95172	0	0	0	0.45	5.7	0	0	hypothetical protein	gi|347836479|emb|CCD51051.1|hypothetical protein [Botryotinia fuckeliana]
TR105884|c0_g1_i1	0	0	0	1.37	27.1	0	0	hydrophobin precursor	gi|347831925|emb|CCD47622.1|Bhp2, hydrophobin class II [Botryotinia fuckeliana]
Mj_1_GCCAAT_L005_R1_001_(paired)_trimmed_(paired)_contig_104726	0	0	0	0	5.14	0	0	glycoside hydrolase family 6 protein	gi|347828648|emb|CCD44345.1|glycoside hydrolase family 6 protein [Botryotinia fuckeliana]
TR64527|c0_g1_i1	7.95	4	3.21	0.18	0.26	0.06	4.15	endo- -beta-glucanase	gi|347466569|gb|AEO97197.1|endo-1,4-beta-glucanase [Populus trichocarpa] gi|347466623|gb|AEO97224.1| endo-1,4-beta-glucanase [Populus trichocarpa]
TR38105|c0_g1_i1	0	0	0	2.4	7.16	0	0	60s ribosomal protein l15	gi|347441870|emb|CCD34791.1|hypothetical protein [Botryotinia fuckeliana]
TR77418|c1_g2_i3	4.56	2.85	5.37	1.89	3.55	2.86	5.08	hypothetical_protein	gi|346703243|emb|CBX25341.1|hypothetical_protein [Oryza brachyantha]
Mj_1_GCCAAT_L005_R1_001_(paired)_trimmed_(paired)_contig_2124	178.64	180.08	532.95	518.13	513.37	517.76	276.75	calmodulin	gi|346466069|gb|AEO32879.1|hypothetical protein [Amblyomma maculatum]
TR54562|c0_g1_i1	147.51	131.08	412.8	391.77	384.42	384.99	210.31	calmodulin	gi|346466069|gb|AEO32879.1|hypothetical protein [Amblyomma maculatum]
TR42257|c0_g1_i1	0	0	0	4.08	5.54	0	0	duf636 domain protein	gi|346326562|gb|EGX96158.1|DUF636 domain protein [Cordyceps militaris CM01]
TR58575|c3_g2_i1	0	0.24	0.3	33.34	30.99	0.84	11.5	hypothetical protein AOL_s00004g152	gi|345571305|gb|EGX54119.1|hypothetical protein AOL_s00004g152 [Arthrobotrys oligospora ATCC 24927]
Mj_1_GCCAAT_L005_R1_001_(paired)_trimmed_(paired)_contig_104839	0	0	0	0	13.57	0	0	cutinase precursor	gi|345569500|gb|EGX52366.1|hypothetical protein AOL_s00043g155 [Arthrobotrys oligospora ATCC 24927]
scaffold11489	2.29	1.29	2.7	8.14	7.67	13.79	4.66	cinnamyl alcohol dehydrogenase	gi|345451026|gb|AEN94093.1|cinnamyl alcohol dehydrogenase [Pyrus pyrifolia]
TR78780|c1_g3_i1	0.36	0	15.24	0.57	0	1.47	3.9	glutathione s-transferase	gi|345423135|gb|AEN84869.1|GST-like protein [Malus x domestica] gi|345423137|gb|AEN84870.1| GST-like protein [Malus x domestica]
C912373	0	0	0	0.42	0.39	0	58.62	transcription factor	gi|345132118|gb|AEN75254.1|transcription factor MADS3 [Prunus avium]
TR37500|c0_g1_i1	0	0	0	0	0	0	5	40s ribosomal protein s2	gi|344190580|gb|AEM97964.1|40S ribosomal protein S2, putative [Dipetalogaster maximus]
Mj_1_GCCAAT_L005_R1_001_(paired)_trimmed_(paired)_contig_80513	0	0.24	0	0.4	0	10.25	0	ultraviolet-b-repressible protein	gi|343887314|dbj|BAK61860.1|hypothetical protein [Citrus unshiu]
TR113773|c0_g1_i1	9.84	10.05	4.38	2.77	4.56	1.93	6.89	bi- major isoform	gi|343485961|dbj|BAK61738.1|ubiquitin [Larcopyle butschlii]
TR70958|c0_g2_i5	5.87	4.31	3.36	1.43	2.47	3.67	3.86	3-hydroxyacyl- dehydratase pasticcino 2	gi|343173225|gb|AEL99315.1|3-hydroxyacyl-CoA dehydratase, partial [Silene latifolia]
TR74294|c1_g1_i4	7.08	7.09	7.65	20.02	13.57	46.81	13.34	c2h2-like zinc finger partial	gi|343172708|gb|AEL99057.1|C2H2-like zinc finger protein, partial [Silene latifolia]
Mj_1_GCCAAT_L005_R1_001_(paired)_trimmed_(paired)_contig_8897	7.06	7.21	8.31	4.42	6.21	6.31	6.72	ccr4-not transcription complex subunit 2	gi|343171878|gb|AEL98643.1|VIRE2 interacting protein, partial [Silene latifolia]
Mj_1_GCCAAT_L005_R1_001_(paired)_trimmed_(paired)_contig_9032	2.37	4.59	11.54	31.96	34.57	32.41	8.64	calmodulin-binding protein	gi|343157316|gb|AEL95441.1|calmodulin-binding protein [Populus euphratica]
scaffold13941	1.83	2.67	7.77	22.96	23.78	21.27	4.93	calmodulin-binding protein	gi|343157316|gb|AEL95441.1|calmodulin-binding protein [Populus euphratica]
TR43982|c0_g1_i1	4.54	3.66	6.01	0.23	2.97	0.32	43.78	integral membrane	gi|341958686|sp|B9IM09.2|CSPLG_POPTRRecName: Full=CASP-like protein POPTRDRAFT_578614
Mj_1_GCCAAT_L005_R1_001_(paired)_trimmed_(paired)_contig_91176	0	0	0	2.5	6.83	0	0	carbohydrate-binding module family 18 protein	gi|340959410|gb|EGS20591.1|deacetylase-like protein [Chaetomium thermophilum var. thermophilum DSM 1495]
TR20986|c0_g1_i1	0	0	0	0	0	0	8.91	myosin light chain 2	gi|340726424|ref|XP_003401558.1|PREDICTED: myosin regulatory light chain 2-like [Bombus terrestris]
Mj_1_GCCAAT_L005_R1_001_(paired)_trimmed_(paired)_contig_3433	26.21	31.77	55.75	35.93	60.12	72.78	38.85	cryptochrome 1 protein 2	gi|340007733|gb|AEK26572.1|cryptochrome 1.2 [Populus tremula]
TR74895|c0_g4_i1	27.07	38.65	58.98	41.12	61.8	71.88	45.99	cryptochrome 1 protein 2	gi|340007733|gb|AEK26572.1|cryptochrome 1.2 [Populus tremula]
TR88387|c0_g1_i1	0	0.25	0	0.41	0	5.4	0	photosystem ii 22 kda protein	gi|340002457|gb|AEK26371.1|chloroplast photosystem II subunit [Sedum alfredii]
scaffold13828	18.35	22.43	34.67	24.61	35.3	46.82	26.09	cryptochrome 1 protein 2	gi|339777721|gb|AEK05698.1|cryptochrome 1 protein 2 [Populus balsamifera] gi|339777727|gb|AEK05701.1| cryptochrome 1 protein 2 [Populus balsamifera] gi|339777729|gb|AEK05702.1| cryptochrome 1 protein 2 [Populus balsamifera] gi|339777731|gb|AEK05703.1| cryptochrome 1 protein 2 [Populus balsamifera] gi|339777733|gb|AEK05704.1| cryptochrome 1 protein 2 [Populus balsamifera] gi|339777735|gb|AEK05705.…
TR72029|c0_g1_i1	1.45	1.9	4.06	11.75	15.74	3.15	18.6	galactinol synthase	gi|339655352|gb|AEJ87260.1|galactinol synthase 2-1 [Populus trichocarpa]
TR54965|c1_g1_i1	90.22	56.48	138.94	119.97	131.6	103.13	91.44	protein	gi|338227614|gb|AEI90836.1|RBX1 [Hevea brasiliensis]
TR51231|c0_g1_i1	3.94	3.94	9.43	8.26	6.51	11.57	10.44	calcium-dependent protein kinase	gi|337729587|gb|AEI70328.1|calcium-dependent protein kinase [Hevea brasiliensis]
TR52551|c0_g1_i3	4.22	2.22	3.96	2.06	2.07	0.29	6.56	purple acid phosphatase	gi|336442427|gb|ADM16565.2|purple acid phosphatase precursor [Euphorbia characias]
TR71532|c1_g1_i2	0.32	1.66	3.99	8.69	13.36	0.12	25.27	myrcene chloroplastic	gi|336318895|gb|AEI52904.1|terpene synthase 4 [Populus trichocarpa]
Mj_1_GCCAAT_L005_R1_001_(paired)_trimmed_(paired)_contig_46332	0.78	0.49	0.67	5.29	5.15	1.04	22.11	( )-nerolidol synthase chloroplastic-like	gi|336318893|gb|AEI52903.1|terpene synthase 3 [Populus trichocarpa]
TR77737|c2_g3_i3	6.62	3.06	0.24	0	0	0	37.3	(-)-germacrene d synthase	gi|336318889|gb|AEI52901.1|terpene synthase 1 [Populus trichocarpa]
TR78346|c0_g4_i1	1.97	0.4	0.33	0	0	0	39.19	(-)-germacrene d synthase	gi|336318889|gb|AEI52901.1|terpene synthase 1 [Populus trichocarpa]
TR61321|c1_g2_i2	0	0	0	1.26	7.1	0	0	40s ribosomal protein s25-4	gi|33590374|gb|AAQ22726.1|40S ribosomal protein S25 [Glycine max]
TR70556|c1_g2_i2	0	0	0	3.69	5.4	0.86	0	carrier protein	gi|335345898|gb|AEH41529.1|ADP,ATP carrier protein [Endocarpon pusillum]
TR57758|c0_g1_i1	19.03	8.87	21.36	18.47	22.91	9.07	22.35	cyclin d3-2	gi|33517432|gb|AAQ19972.1|cyclin D3-2 [Euphorbia esula]
TR71316|c0_g1_i1	247.31	196.34	478.74	338.15	278.19	169.59	469.72	polyubiquitin	gi|334186377|ref|NP_001190681.1|ubiquitin 11 [Arabidopsis thaliana] gi|357512383|ref|XP_003626480.1| Ubiquitin-like protein [Medicago truncatula] gi|40287484|gb|AAR83856.1| hexameric polyubiquitin 6PU11 [Capsicum annuum] gi|147802377|emb|CAN77120.1| hypothetical protein VITISV_031666 [Vitis vinifera] gi|217074820|gb|ACJ85770.1| unknown [Medicago truncatula] gi|332657071|gb|AEE82471.1| ubiquitin 1…
TR54745|c1_g2_i3	6.09	6.11	5.86	3.06	3.29	1.83	5.44	katanin p80 wd40 repeat-containing subunit b1 homolog 1-like	gi|334183466|ref|NP_001185277.1|transducin/WD-40 repeat-containing protein [Arabidopsis thaliana] gi|332195683|gb|AEE33804.1| transducin/WD-40 repeat-containing protein [Arabidopsis thaliana]
Mj_1_GCCAAT_L005_R1_001_(paired)_trimmed_(paired)_contig_89771	0	0	0	0.26	15.72	0	0	peptidyl-prolyl cis-trans isomerase	gi|33357681|gb|AAQ16572.1|putative mitochondrial cyclophilin 1 [Botryotinia fuckeliana] gi|347838875|emb|CCD53447.1| BCP1, peptidyl-prolylisomerase, cyclophilin A [Botryotinia fuckeliana]
TR46262|c0_g2_i1	0	0	0	1.86	5.71	0.16	0.14	peptidyl-prolyl cis-trans isomerase	gi|33357681|gb|AAQ16572.1|putative mitochondrial cyclophilin 1 [Botryotinia fuckeliana] gi|347838875|emb|CCD53447.1| BCP1, peptidyl-prolylisomerase, cyclophilin A [Botryotinia fuckeliana]
TR112134|c0_g1_i1	0.28	0.26	0.97	1.74	0.41	22.14	0	metallothionein-like protein	gi|3334263|sp|O48951.1|MT3_PRUAVRecName: Full=Metallothionein-like protein 1; Short=MT-1 gi|2736264|gb|AAC04612.1| metallothionein-like protein [Prunus avium]
TR57553|c0_g2_i1	123.3	107.85	289.81	181.64	246.64	251.78	158.22	eukaryotic translation initiation factor 5a3	gi|333108569|gb|AEF15868.1|eukaryotic translation initiation factor 5A3 [Populus tremula x Populus alba]
TR57565|c0_g1_i2	103.73	101.09	225.75	150.12	220.21	209.48	138.31	eukaryotic translation initiation factor 5a3	gi|333108569|gb|AEF15868.1|eukaryotic translation initiation factor 5A3 [Populus tremula x Populus alba]
C927978	335.71	282.78	636.79	455.31	578.51	590.52	418.49	eukaryotic translation initiation factor 5a4	gi|333108555|gb|AEF15861.1|eukaryotic translation initiation factor 5A1 [Populus tomentosa]
TR57565|c0_g2_i1	278.24	253.1	580.14	371.62	493.24	493.95	349.74	eukaryotic translation initiation factor 5a4	gi|333108555|gb|AEF15861.1|eukaryotic translation initiation factor 5A1 [Populus tomentosa]
TR67400|c0_g1_i1	7.23	6.04	12.06	61.29	5.86	70.63	8.33	cellulose synthase	gi|332356341|gb|AEE60894.1|cellulose synthase [Populus tomentosa]
scaffold14397	14.21	12.49	54.52	20.92	12.53	6.31	21.29	cellulose synthase catalytic subunit	gi|33186651|gb|AAP97495.1|cellulose synthase [Solanum tuberosum]
TR52357|c0_g1_i1	0	0	0	35.09	79.07	1.99	0	glucose-repressible protein	gi|331221016|ref|XP_003323183.1|hypothetical protein PGTG_04720 [Puccinia graminis f. sp. tritici CRL 75-36-700-3] gi|309302173|gb|EFP78764.1| hypothetical protein PGTG_04720 [Puccinia graminis f. sp. tritici CRL 75-36-700-3]
C917512	0	0	0	9.98	9.03	0	0	hypothetical protein PTT_20340	gi|330947968|ref|XP_003307019.1|hypothetical protein PTT_20340 [Pyrenophora teres f. teres 0-1] gi|311315198|gb|EFQ84906.1| hypothetical protein PTT_20340 [Pyrenophora teres f. teres 0-1]
TR50297|c0_g1_i2	0	0	0	6.96	8.73	0.23	0	hypothetical protein PTT_20340	gi|330947968|ref|XP_003307019.1|hypothetical protein PTT_20340 [Pyrenophora teres f. teres 0-1] gi|311315198|gb|EFQ84906.1| hypothetical protein PTT_20340 [Pyrenophora teres f. teres 0-1]
TR68069|c0_g3_i3	0	0	0	14.77	25.6	0.64	0	hypothetical protein PTT_19105	gi|330941693|ref|XP_003306078.1|hypothetical protein PTT_19105 [Pyrenophora teres f. teres 0-1] gi|311316603|gb|EFQ85824.1| hypothetical protein PTT_19105 [Pyrenophora teres f. teres 0-1]
TR68069|c0_g3_i8	0	0	0	15.65	18.94	0.26	0	hypothetical protein PTT_19105	gi|330941693|ref|XP_003306078.1|hypothetical protein PTT_19105 [Pyrenophora teres f. teres 0-1] gi|311316603|gb|EFQ85824.1| hypothetical protein PTT_19105 [Pyrenophora teres f. teres 0-1]
TR45848|c0_g1_i1	0	0	0	4.92	5.24	0.46	0.2	mfs monosaccharide	gi|330931852|ref|XP_003303561.1|hypothetical protein PTT_15817 [Pyrenophora teres f. teres 0-1] gi|311320366|gb|EFQ88340.1| hypothetical protein PTT_15817 [Pyrenophora teres f. teres 0-1]
Mj_1_GCCAAT_L005_R1_001_(paired)_trimmed_(paired)_contig_88414	0	0	0.25	8.11	6.04	0.47	0	thioredoxin	gi|330931477|ref|XP_003303420.1|hypothetical protein PTT_15618 [Pyrenophora teres f. teres 0-1] gi|311320594|gb|EFQ88475.1| hypothetical protein PTT_15618 [Pyrenophora teres f. teres 0-1]
Mj_1_GCCAAT_L005_R1_001_(paired)_trimmed_(paired)_contig_91150	0	0	0	0.84	5.91	0	0	hypothetical protein PTT_15325	gi|330930923|ref|XP_003303195.1|hypothetical protein PTT_15325 [Pyrenophora teres f. teres 0-1] gi|311320935|gb|EFQ88709.1| hypothetical protein PTT_15325 [Pyrenophora teres f. teres 0-1]
TR42442|c0_g1_i1	0	0	0.33	5.36	7.98	0.31	0	hypothetical protein PTT_15016	gi|330930365|ref|XP_003303004.1|hypothetical protein PTT_15016 [Pyrenophora teres f. teres 0-1] gi|311321306|gb|EFQ88904.1| hypothetical protein PTT_15016 [Pyrenophora teres f. teres 0-1]
Mj_1_GCCAAT_L005_R1_001_(paired)_trimmed_(paired)_contig_90590	0	0	0	5.87	6.73	0.36	0	protein bli-3	gi|330929739|ref|XP_003302758.1|hypothetical protein PTT_14694 [Pyrenophora teres f. teres 0-1] gi|311321689|gb|EFQ89153.1| hypothetical protein PTT_14694 [Pyrenophora teres f. teres 0-1]
TR52925|c0_g2_i1	0	0	0	19.6	27.54	0.42	0	upf0591 membrane protein	gi|330929107|ref|XP_003302522.1|hypothetical protein PTT_14363 [Pyrenophora teres f. teres 0-1] gi|311322077|gb|EFQ89381.1| hypothetical protein PTT_14363 [Pyrenophora teres f. teres 0-1]
Mj_1_GCCAAT_L005_R1_001_(paired)_trimmed_(paired)_contig_85726	0	0.2	0	3.59	5.84	0	0	atp synthase d mitochondrial	gi|330928826|ref|XP_003302413.1|hypothetical protein PTT_14217 [Pyrenophora teres f. teres 0-1] gi|311322232|gb|EFQ89473.1| hypothetical protein PTT_14217 [Pyrenophora teres f. teres 0-1]
TR64582|c4_g2_i1	0	0	0	5.12	3.1	0	0.23	atp synthase subunit beta	gi|330928210|ref|XP_003302169.1|hypothetical protein PTT_13892 [Pyrenophora teres f. teres 0-1] gi|311322642|gb|EFQ89755.1| hypothetical protein PTT_13892 [Pyrenophora teres f. teres 0-1]
TR34071|c0_g1_i1	0	0	0.16	5.16	4.46	0	0	g-protein comlpex beta subunit	gi|330927238|ref|XP_003301795.1|hypothetical protein PTT_13386 [Pyrenophora teres f. teres 0-1] gi|396465762|ref|XP_003837489.1| similar to guanine nucleotide-binding protein subunit beta-2-like 1 [Leptosphaeria maculans JN3] gi|311323213|gb|EFQ90102.1| hypothetical protein PTT_13386 [Pyrenophora teres f. teres 0-1] gi|312214047|emb|CBX94049.1| similar to guanine nucleotide-binding protein subuni…
Mj_1_GCCAAT_L005_R1_001_(paired)_trimmed_(paired)_contig_93055	0	0	0	2.97	6.22	0	0	superoxide dismutase	gi|330917667|ref|XP_003297908.1|hypothetical protein PTT_08464 [Pyrenophora teres f. teres 0-1] gi|311329209|gb|EFQ94039.1| hypothetical protein PTT_08464 [Pyrenophora teres f. teres 0-1]
TR58450|c1_g1_i1	0	0	0	4.24	15.6	0	0	elongation factor 1-alpha	gi|330917621|ref|XP_003297885.1|hypothetical protein PTT_08441 [Pyrenophora teres f. teres 0-1] gi|311329186|gb|EFQ94016.1| hypothetical protein PTT_08441 [Pyrenophora teres f. teres 0-1]
TR9663|c0_g1_i1	0	0	0	4.69	6.98	0	0	hypothetical protein PTT_07610	gi|330916041|ref|XP_003297272.1|hypothetical protein PTT_07610 [Pyrenophora teres f. teres 0-1] gi|311330171|gb|EFQ94647.1| hypothetical protein PTT_07610 [Pyrenophora teres f. teres 0-1]
TR61710|c0_g1_i6	62.75	79.84	360.99	377.55	256.42	355.25	443.44	plasma membrane intrinsic protein	gi|330717899|gb|AEC45513.1|plasma membrane intrinsic protein [Hevea brasiliensis]
scaffold13780	8.46	6.55	3.08	3.22	2.58	4.09	8.94	dna glycosylase	gi|330370553|gb|AEC12446.1|repressor of gene silencing 1 [Gossypium hirsutum]
TR61167|c0_g1_i1	9.19	5.15	15.11	7.87	11.13	11.02	10.36	peptidase-s24 s26 domain-containing protein	gi|330318674|gb|AEC10997.1|hypothetical protein [Camellia sinensis]
TR61851|c0_g4_i3	606.41	153.41	445.67	241.95	296.51	449.66	296.23	histone h2b	gi|330318558|gb|AEC10951.1|histone H2B.2 [Camellia sinensis]
Mj_1_GCCAAT_L005_R1_001_(paired)_trimmed_(paired)_contig_1110	157.05	29.67	77.02	26.85	31.8	25.84	76.47	histone h2a	gi|330318556|gb|AEC10950.1|histone H2A [Camellia sinensis]
TR54342|c0_g2_i3	391.69	82.43	188.63	64.67	82.25	60.99	174.75	histone h2a	gi|330318556|gb|AEC10950.1|histone H2A [Camellia sinensis]
TR68664|c1_g3_i1	7.69	4.2	9.8	9.72	10.09	8.71	6.19	thioredoxin m	gi|329750619|gb|AEC03325.1|mitochondrial thioredoxin 2 [Hevea brasiliensis]
TR68700|c0_g1_i5	3.83	1.7	3.06	5.21	4.91	4.86	3.91	thioredoxin m	gi|329750619|gb|AEC03325.1|mitochondrial thioredoxin 2 [Hevea brasiliensis]
TR76648|c5_g1_i2	113.45	94.11	217.06	260.98	341.13	159.75	122.12	thioredoxin h	gi|329750603|gb|AEC03317.1|thioredoxin H-type 3 [Hevea brasiliensis]
TR76648|c6_g1_i1	164.3	137.8	286.64	384.11	445.17	221.96	172.95	thioredoxin h	gi|329750603|gb|AEC03317.1|thioredoxin H-type 3 [Hevea brasiliensis]
Mj_1_GCCAAT_L005_R1_001_(paired)_trimmed_(paired)_contig_24826	12.96	11.92	32.15	10.02	14.34	13.68	15.72	cc-nbs-lrr resistance protein	gi|328447252|gb|AEB06130.1|Rpp4 candidate R9 [Glycine max]
TR74895|c1_g3_i2	2.21	4.34	10.24	7.01	13.8	20.78	4.87	cryptochrome 1 protein 2	gi|327342142|gb|AEA50858.1|cry1-1 [Populus tremula]
TR53253|c1_g1_i2	0	0	0	3.44	8.83	1.53	0	heat shock protein 90	gi|327164445|dbj|BAK08742.1|heat shock protein 90 [Chara braunii]
scaffold11503	0.12	0.24	0.29	0	0	0	118.6	agamous-like protein	gi|326910844|gb|AEA11211.1|AGAMOUS-like protein [Jatropha curcas]
Mj_1_GCCAAT_L005_R1_001_(paired)_trimmed_(paired)_contig_6815	4.86	12.52	0.4	1.15	0.42	0.13	0.42	hypothetical chloroplast rf19	gi|326909448|ref|YP_004327719.1|hypothetical chloroplast RF1 [Hevea brasiliensis] gi|308523562|gb|ADO33612.1| hypothetical chloroplast RF1 [Hevea brasiliensis]
TR71326|c1_g2_i2	7.14	5.67	6.96	10.96	12.61	16.25	11.57	hypothetical chloroplast rf19	gi|326909448|ref|YP_004327719.1|hypothetical chloroplast RF1 [Hevea brasiliensis] gi|308523562|gb|ADO33612.1| hypothetical chloroplast RF1 [Hevea brasiliensis]
TR72157|c1_g1_i1	7.36	29.23	0.52	3.79	1.07	0.23	0.85	hypothetical chloroplast rf1	gi|326909448|ref|YP_004327719.1|hypothetical chloroplast RF1 [Hevea brasiliensis] gi|308523562|gb|ADO33612.1| hypothetical chloroplast RF1 [Hevea brasiliensis]
TR64038|c1_g2_i7	4.48	12.7	0.6	8.87	1.78	0.27	0.64	atp-dependent clp protease proteolytic subunit	gi|326909417|ref|YP_004327687.1|ATP-dependent Clp protease proteolytic subunit [Hevea brasiliensis] gi|308523531|gb|ADO33581.1| ATP-dependent Clp protease proteolytic subunit [Hevea brasiliensis]
Mj_1_GCCAAT_L005_R1_001_(paired)_trimmed_(paired)_contig_7433	20.71	123.74	2.34	16.7	2.99	0.61	3.04	atp synthase cf1 alpha subunit	gi|326909387|ref|YP_004327656.1|ATP synthase CF1 alpha subunit [Hevea brasiliensis] gi|308523501|gb|ADO33551.1| ATP synthase CF1 alpha subunit [Hevea brasiliensis]
scaffold13429	17.61	100.14	1.95	14.04	2.83	0.76	2.49	atp synthase cf1 alpha subunit	gi|326909387|ref|YP_004327656.1|ATP synthase CF1 alpha subunit [Hevea brasiliensis] gi|308523501|gb|ADO33551.1| ATP synthase CF1 alpha subunit [Hevea brasiliensis]
Mj_1_GCCAAT_L005_R1_001_(paired)_trimmed_(paired)_contig_41473	3.56	3.68	7.09	3.89	3.66	3.62	5.91	serine threonine protein phosphatase 2a 55 kda regulatory subunit b beta isoform-like	gi|326519516|dbj|BAK00131.1|predicted protein [Hordeum vulgare subsp. vulgare]
TR51543|c1_g2_i1	0	0	0	5.46	7.27	0	0	40s ribosomal protein s25	gi|326512730|dbj|BAK03272.1|predicted protein [Hordeum vulgare subsp. vulgare]
TR43894|c0_g1_i1	0	0	0	1.94	5.48	0.27	0.24	plasma membrane h+-atpase pma1	gi|326508144|dbj|BAJ99339.1|predicted protein [Hordeum vulgare subsp. vulgare]
TR55000|c0_g2_i3	0	0	0	3.94	5.67	0.32	0.14	plasma membrane h+-atpase pma1	gi|326508144|dbj|BAJ99339.1|predicted protein [Hordeum vulgare subsp. vulgare]
TR57450|c1_g1_i3	0	0	0	7.62	10.25	0.76	0	alcohol dehydrogenase	gi|326501504|dbj|BAK02541.1|predicted protein [Hordeum vulgare subsp. vulgare]
TR72553|c2_g1_i1	0	0	0	3.08	9.11	0.31	0	alcohol dehydrogenase	gi|326501504|dbj|BAK02541.1|predicted protein [Hordeum vulgare subsp. vulgare]
TR72553|c3_g1_i1	0	0	0	9.3	7.02	0.11	0	alcohol dehydrogenase	gi|326501504|dbj|BAK02541.1|predicted protein [Hordeum vulgare subsp. vulgare]
TR72553|c3_g1_i13	0	0	0	6.09	3.75	0.16	0.15	alcohol dehydrogenase 1	gi|326501504|dbj|BAK02541.1|predicted protein [Hordeum vulgare subsp. vulgare]
TR72553|c3_g1_i16	0	0	0	2.72	5.39	0	0	alcohol dehydrogenase	gi|326501504|dbj|BAK02541.1|predicted protein [Hordeum vulgare subsp. vulgare]
TR72553|c3_g1_i17	0	0	0	3.79	8.52	1.02	0	alcohol dehydrogenase	gi|326501504|dbj|BAK02541.1|predicted protein [Hordeum vulgare subsp. vulgare]
TR72553|c3_g1_i3	0	0	0	7.61	12.16	0	0	alcohol dehydrogenase 1	gi|326501504|dbj|BAK02541.1|predicted protein [Hordeum vulgare subsp. vulgare]
TR72553|c3_g1_i7	0	0.23	0	7.57	8.38	0	0	alcohol dehydrogenase	gi|326501504|dbj|BAK02541.1|predicted protein [Hordeum vulgare subsp. vulgare]
TR76723|c3_g3_i1	0	0	0	11.9	24.8	0.31	0.18	alcohol dehydrogenase 1	gi|326501504|dbj|BAK02541.1|predicted protein [Hordeum vulgare subsp. vulgare]
TR76723|c3_g3_i5	0	0	0	2.77	5.57	0.13	0.11	alcohol dehydrogenase 1	gi|326501504|dbj|BAK02541.1|predicted protein [Hordeum vulgare subsp. vulgare]
TR76723|c3_g5_i1	0	0	0	5.88	6.41	0	0	alcohol dehydrogenase 1	gi|326501504|dbj|BAK02541.1|predicted protein [Hordeum vulgare subsp. vulgare]
TR67641|c6_g3_i9	1.4	1.57	1.93	3.7	7.31	4.39	5.98	escrt-ii complex subunit vps22	gi|326496727|dbj|BAJ98390.1|predicted protein [Hordeum vulgare subsp. vulgare]
TR69561|c0_g1_i2	3.92	2.28	4.82	3.79	5.09	3.59	4.37	tetratricopeptide repeat domain-containing protein	gi|326496052|dbj|BAJ90647.1|predicted protein [Hordeum vulgare subsp. vulgare]
TR72637|c4_g1_i1	0.94	3.38	6.8	2.59	2.3	9.62	4.7	abc transporter b family member	gi|325977001|gb|ADZ48235.1|multidrug/pheromone exporter protein [Hevea brasiliensis]
TR63185|c0_g1_i3	0	0	0	1.75	7.2	0.89	0	cold-regulated protein 1	gi|325611166|gb|ADZ36804.1|hypothetical protein [Chlorella vulgaris]
TR69963|c0_g1_i1	7.2	8.98	10.27	17.61	19.17	9.41	5.58	beta-carotene hydroxylase	gi|325461582|gb|ADZ14893.1|beta-carotene hydroxylase [Carica papaya]
Mj_1_GCCAAT_L005_R1_001_(paired)_trimmed_(paired)_contig_51167	0	0	0	2.39	51.75	0	0.25	protein	gi|325089337|gb|EGC42647.1|transcript antisense to ribosomal RNA protein [Ajellomyces capsulatus H88]
C974856	0.08	0.18	0.09	8.55	1.96	0.21	0.5	ribosomal protein s1	gi|323649906|ref|YP_004237279.1|ribosomal protein S1 (mitochondrion) [Ricinus communis] gi|322394286|gb|ADW96043.1| ribosomal protein S1 (mitochondrion) [Ricinus communis]
Mj_1_GCCAAT_L005_R1_001_(paired)_trimmed_(paired)_contig_49566	0.11	0.23	0.06	5.97	1.53	0.27	0.24	ribosomal protein s1	gi|323649906|ref|YP_004237279.1|ribosomal protein S1 (mitochondrion) [Ricinus communis] gi|322394286|gb|ADW96043.1| ribosomal protein S1 (mitochondrion) [Ricinus communis]
TR57485|c0_g1_i1	0.23	0.44	0	23.65	6.16	0.76	1.36	ribosomal protein s1	gi|323649906|ref|YP_004237279.1|ribosomal protein S1 (mitochondrion) [Ricinus communis] gi|322394286|gb|ADW96043.1| ribosomal protein S1 (mitochondrion) [Ricinus communis]
TR70872|c1_g1_i10	0.38	0.85	0.06	13.32	2.89	0.26	0.6	ribosomal protein s3	gi|323649895|ref|YP_004237268.1|ribosomal protein S3 (mitochondrion) [Ricinus communis] gi|322394275|gb|ADW96032.1| ribosomal protein S3 (mitochondrion) [Ricinus communis]
TR70872|c1_g1_i9	0.39	1.01	0.17	15.48	2.89	0.44	0.67	ribosomal protein s3	gi|323649895|ref|YP_004237268.1|ribosomal protein S3 (mitochondrion) [Ricinus communis] gi|322394275|gb|ADW96032.1| ribosomal protein S3 (mitochondrion) [Ricinus communis]
TR38405|c0_g1_i2	0	0	0	2.27	7.02	0.45	0	high mobility group protein	gi|323456782|gb|EGB12648.1|hypothetical protein AURANDRAFT_17678, partial [Aureococcus anophagefferens]
TR68111|c0_g3_i3	0.56	0.18	0.28	5.18	4.6	1.37	1.26	nadh dehydrogenase subunit 2	gi|323435045|ref|YP_004222261.1|hypothetical protein BevumaM_p022 [Beta vulgaris subsp. maritima] gi|346683138|ref|YP_004842068.1| hypothetical protein BemaM_p020 [Beta macrocarpa] gi|317905698|emb|CBX33237.1| hypothetical protein [Beta vulgaris subsp. maritima] gi|319439778|emb|CBX33289.1| hypothetical protein [Beta vulgaris subsp. maritima] gi|320148010|emb|CBJ20676.1| hypothetical protein [Bet…
Mj_1_GCCAAT_L005_R1_001_(paired)_trimmed_(paired)_contig_102177	0	0	0	1.15	5.79	1.07	0	glutathione-dependent formaldehyde-activating	gi|322702679|gb|EFY94309.1|DUF636 domain protein [Metarhizium anisopliae ARSEF 23]
TR35158|c0_g1_i1	0	0	0	2.75	23.62	1.2	0	glutathione-dependent formaldehyde-activating	gi|322702679|gb|EFY94309.1|DUF636 domain protein [Metarhizium anisopliae ARSEF 23]
TR50300|c0_g2_i1	0	0	0	3.31	12.13	1.39	0	plasma membrane proteolipid 3	gi|321253028|ref|XP_003192603.1|cation transport-related protein [Cryptococcus gattii WM276] gi|317459072|gb|ADV20816.1| cation transport-related protein, putative [Cryptococcus gattii WM276] gi|405123028|gb|AFR97793.1| hypothetical protein CNAG_01588 [Cryptococcus neoformans var. grubii H99]
Mj_1_GCCAAT_L005_R1_001_(paired)_trimmed_(paired)_contig_97421	0	0	0	0.43	9.58	0	0	xyloglucan-specific endo-beta- -glucanase a	gi|320589096|gb|EFX01560.1|cell 12a endoglucanase [Grosmannia clavigera kw1407]
Mj_1_GCCAAT_L005_R1_001_(paired)_trimmed_(paired)_contig_50339	0	0.2	0	0	0	0	27.33	chalcone synthase	gi|320117902|gb|ADW11243.1|chalcone synthase 2 [Camellia chekiangoleosa] gi|378749112|gb|AFC37243.1| chalcone synthase 2 [Camellia chekiangoleosa]
TR77503|c3_g1_i4	59.82	103.15	182.98	99.91	49.55	42.94	90.53	cellulose synthase	gi|319659269|gb|ADV58936.1|cellulose synthase [Populus ussuriensis]
scaffold13034	93.84	43.44	141.39	110.99	137.89	125.47	116.33	60s ribosomal protein	gi|319428655|gb|ADV56679.1|60S ribosomal protein [Phaseolus vulgaris] gi|319428672|gb|ADV56695.1| 60S ribosomal protein [Phaseolus vulgaris]
TR53503|c0_g1_i1	7.02	8.69	14.52	4.78	6.55	4.41	10.64	adp-ribosylation factor 3	gi|3182922|sp|Q96361.3|ARF1_BRARPRecName: Full=ADP-ribosylation factor 1 gi|1654142|gb|AAB17725.1| small GTP-binding protein ARF [Brassica rapa subsp. campestris]
TR53503|c0_g1_i2	5.17	6.39	9.41	4.6	5.25	3.97	8.03	adp-ribosylation factor 3	gi|3182922|sp|Q96361.3|ARF1_BRARPRecName: Full=ADP-ribosylation factor 1 gi|1654142|gb|AAB17725.1| small GTP-binding protein ARF [Brassica rapa subsp. campestris]
TR55444|c0_g3_i1	4.68	5.5	11.16	2.29	4.5	3.07	7.34	adp-ribosylation factor 3	gi|3182922|sp|Q96361.3|ARF1_BRARPRecName: Full=ADP-ribosylation factor 1 gi|1654142|gb|AAB17725.1| small GTP-binding protein ARF [Brassica rapa subsp. campestris]
TR73988|c1_g3_i1	8.54	42.66	3.02	19.33	5.07	1.26	5.6	photosystem ii d2 protein	gi|31745675|gb|AAP56262.1|PSII D2 [Pyrus communis]
Mj_1_GCCAAT_L005_R1_001_(paired)_trimmed_(paired)_contig_229	15.95	10.48	22.18	21.31	22.25	27.27	19.79	nicotiana eukaryotic translation initiation factor 4a	gi|317159565|gb|ADV04057.1|DEAD box RNA helicase RH2a [Hevea brasiliensis]
Mj_1_GCCAAT_L005_R1_001_(paired)_trimmed_(paired)_contig_87737	0	0	0	0.3	10.24	0	0.19	histone h3	gi|317137109|ref|XP_001727504.2|histone H3 [Aspergillus oryzae RIB40]
TR54798|c0_g4_i16	0	0	0	5.04	8.09	0.41	0.18	histone h3	gi|317137109|ref|XP_001727504.2|histone H3 [Aspergillus oryzae RIB40]
TR58148|c1_g2_i18	0	0	0	1.92	6.45	0	0	histone h3	gi|317137109|ref|XP_001727504.2|histone H3 [Aspergillus oryzae RIB40]
TR58148|c1_g2_i5	0	0	0	2.49	8.21	0.87	0.26	histone h3	gi|317137109|ref|XP_001727504.2|histone H3 [Aspergillus oryzae RIB40]
Mj_1_GCCAAT_L005_R1_001_(paired)_trimmed_(paired)_contig_2242	8.46	3.37	3.47	3.76	6.6	7.46	3.24	elongation factor family protein	gi|317106769|dbj|BAJ53261.1|JMS10C05.4 [Jatropha curcas]
Mj_1_GCCAAT_L005_R1_001_(paired)_trimmed_(paired)_contig_16587	2.97	0.74	9.62	9.04	9.48	8.32	4.02	seed imbibition protein	gi|317106767|dbj|BAJ53259.1|JMS10C05.2 [Jatropha curcas]
TR71761|c0_g1_i2	3.34	0.83	15.54	14.57	13.81	13.93	9.71	galactinol--sucrose galactosyltransferase 2	gi|317106767|dbj|BAJ53259.1|JMS10C05.2 [Jatropha curcas]
TR71761|c0_g1_i4	2.11	0.77	11.3	15.47	16.74	15.37	8.58	seed imbibition protein	gi|317106767|dbj|BAJ53259.1|JMS10C05.2 [Jatropha curcas]
TR72011|c0_g1_i1	2.3	0.22	13.54	10.79	13.45	12.41	5.91	imbibition protein homolog	gi|317106767|dbj|BAJ53259.1|JMS10C05.2 [Jatropha curcas]
TR72011|c0_g1_i5	2.17	0.19	15.33	10.94	19.12	13.76	10.49	imbibition protein homolog	gi|317106767|dbj|BAJ53259.1|JMS10C05.2 [Jatropha curcas]
scaffold13822	1.35	0.55	8.14	8.59	9.12	8.02	4.31	galactinol--sucrose galactosyltransferase 2	gi|317106767|dbj|BAJ53259.1|JMS10C05.2 [Jatropha curcas]
scaffold13823	1.2	0.4	8.19	9.12	9.3	8.51	4.43	galactinol--sucrose galactosyltransferase 2	gi|317106767|dbj|BAJ53259.1|JMS10C05.2 [Jatropha curcas]
TR57009|c0_g1_i1	2.82	6.84	3.18	3.36	3.35	1.83	1.86	thiol-disulphide oxidoreductase dcc	gi|317106732|dbj|BAJ53228.1|JHL06P13.8 [Jatropha curcas]
TR60548|c0_g3_i1	2.46	5.16	2.32	1.88	2.36	1.86	2.24	thiol-disulphide oxidoreductase dcc	gi|317106732|dbj|BAJ53228.1|JHL06P13.8 [Jatropha curcas]
TR63466|c0_g1_i3	63.64	44.73	62.03	73.48	65.67	84.95	47.08	dead-box atp-dependent rna helicase 56	gi|317106728|dbj|BAJ53224.1|JHL06P13.3 [Jatropha curcas]
scaffold10027	44.24	29.94	38.85	51.74	41.64	58.95	30.24	protein	gi|317106728|dbj|BAJ53224.1|JHL06P13.3 [Jatropha curcas]
Mj_1_GCCAAT_L005_R1_001_(paired)_trimmed_(paired)_contig_72543	0.22	0	10.95	0.09	0.65	0	40.06	casbene chloroplast	gi|317106722|dbj|BAJ53219.1|JHL17M24.3 [Jatropha curcas]
Mj_1_GCCAAT_L005_R1_001_(paired)_trimmed_(paired)_contig_5874	7.73	7.05	13.25	11.65	11.47	10.57	11.86	transcription initiation factor iib-2	gi|317106705|dbj|BAJ53205.1|JHL06B08.6 [Jatropha curcas]
TR75423|c0_g1_i2	13.94	10.86	12.96	4.85	4.47	5.15	12.93	autoinhibited calcium atpase	gi|317106700|dbj|BAJ53200.1|JHL06B08.1 [Jatropha curcas]
scaffold14238	8.97	6.86	8.09	3.19	2.9	3.07	7.98	autoinhibited calcium atpase	gi|317106700|dbj|BAJ53200.1|JHL06B08.1 [Jatropha curcas]
TR53750|c0_g1_i1	53.72	43.78	75.43	81.8	83.87	64.73	93.68	ubiquitin-conjugating enzyme e2 i	gi|317106698|dbj|BAJ53199.1|JHL03K20.8 [Jatropha curcas]
scaffold10475	11.94	11	14.85	21.74	14.76	13.69	19.5	ubiquitin-conjugating enzyme e2 i	gi|317106698|dbj|BAJ53199.1|JHL03K20.8 [Jatropha curcas]
Mj_1_GCCAAT_L005_R1_001_(paired)_trimmed_(paired)_contig_1088	72.13	46.12	38.79	20.72	19.81	20.54	42.1	polyadenylate-binding protein 2-like	gi|317106694|dbj|BAJ53195.1|JHL03K20.4 [Jatropha curcas]
TR38700|c0_g1_i1	63.17	48.17	31.3	16.97	14.88	19.94	36.47	polyadenylate-binding protein 2-like	gi|317106694|dbj|BAJ53195.1|JHL03K20.4 [Jatropha curcas]
TR60596|c0_g1_i1	63.02	39.76	36.79	19.38	20.74	16.87	39.16	polyadenylate-binding protein 2-like	gi|317106694|dbj|BAJ53195.1|JHL03K20.4 [Jatropha curcas]
TR75669|c1_g2_i2	6.34	3.77	5.64	3.26	4.25	3.79	32.98	transcription factor apetala2	gi|317106692|dbj|BAJ53193.1|JHL03K20.2 [Jatropha curcas]
TR62080|c0_g1_i4	15.39	6.83	7.84	11.9	12.99	15.42	4.53	gtpase obg-like	gi|317106668|dbj|BAJ53171.1|JHL18I08.5 [Jatropha curcas]
Mj_1_GCCAAT_L005_R1_001_(paired)_trimmed_(paired)_contig_23607	12.1	9.18	9.66	9.49	15.16	9.16	10.96	upf0559 protein v1g247787-like	gi|317106667|dbj|BAJ53170.1|JHL18I08.4 [Jatropha curcas]
TR62125|c0_g1_i1	3.18	3.3	6.02	8.44	7.43	6.04	10.18	xylem bark cysteine peptidase 3	gi|317106666|dbj|BAJ53169.1|JHL18I08.3 [Jatropha curcas]
TR62125|c0_g1_i2	2.92	2.84	3.65	6.4	5.03	4.62	8.12	xylem bark cysteine peptidase 3	gi|317106666|dbj|BAJ53169.1|JHL18I08.3 [Jatropha curcas]
TR64141|c0_g1_i1	45.39	51.79	9.8	27.98	21.58	14.83	17.43	atp-dependent protease la domain-containing protein	gi|317106665|dbj|BAJ53168.1|JHL18I08.2 [Jatropha curcas]
Mj_1_GCCAAT_L005_R1_001_(paired)_trimmed_(paired)_contig_45265	0.45	0	0.11	0.43	0	0.1	31.75	strictosidine synthase	gi|317106655|dbj|BAJ53159.1|JHL10I11.5 [Jatropha curcas]
scaffold13563	0.22	0	0.13	0.17	0	0.12	19.26	strictosidine synthase 1-like	gi|317106655|dbj|BAJ53159.1|JHL10I11.5 [Jatropha curcas]
TR66652|c1_g2_i3	5.98	4.54	2.89	5.84	5.27	4.08	3.63	2-aminoethanethiol dioxygenase-like	gi|317106653|dbj|BAJ53157.1|JHL10I11.3 [Jatropha curcas]
TR66652|c1_g2_i4	2.75	3.15	2.28	5.6	4.52	4.38	3.83	2-aminoethanethiol dioxygenase-like	gi|317106653|dbj|BAJ53157.1|JHL10I11.3 [Jatropha curcas]
TR69723|c0_g1_i1	7.51	4.36	5.65	4.05	6.22	5.48	8.62	splicing factor u2af-associated	gi|317106644|dbj|BAJ53149.1|JHL23J11.4 [Jatropha curcas]
TR69723|c0_g1_i2	7.28	4.97	6.21	4	8.24	6.06	8.76	splicing factor u2af-associated	gi|317106644|dbj|BAJ53149.1|JHL23J11.4 [Jatropha curcas]
Mj_1_GCCAAT_L005_R1_001_(paired)_trimmed_(paired)_contig_11033	7.92	5.39	10.23	7.67	5.32	7.61	6.78	pre-mrna splicing factor prp38	gi|317106643|dbj|BAJ53148.1|JHL23J11.3 [Jatropha curcas]
TR47765|c0_g1_i1	20.92	13.71	16.51	18.02	13.3	17.94	20.3	pre-mrna-splicing factor 38a	gi|317106643|dbj|BAJ53148.1|JHL23J11.3 [Jatropha curcas]
TR47765|c0_g1_i2	11.7	8.82	10.89	11.84	8.13	13.26	12.18	pre-mrna-splicing factor 38a	gi|317106643|dbj|BAJ53148.1|JHL23J11.3 [Jatropha curcas]
scaffold12983	9.4	6.74	7.01	6.72	7.5	6.26	8.5	pre-mrna-splicing factor 38a	gi|317106643|dbj|BAJ53148.1|JHL23J11.3 [Jatropha curcas]
Mj_1_GCCAAT_L005_R1_001_(paired)_trimmed_(paired)_contig_11253	12.55	8.4	14.33	9.37	10.16	11.83	14.02	poly polymerase	gi|317106636|dbj|BAJ53142.1|JHL05D22.13 [Jatropha curcas]
TR68467|c2_g5_i1	11.18	6.85	10.78	7.64	11.25	11.75	12.37	poly polymerase	gi|317106636|dbj|BAJ53142.1|JHL05D22.13 [Jatropha curcas]
TR64491|c0_g1_i1	30.25	19.2	42.39	26.34	26.44	29.63	29.1	alpha- -galacturonosyltransferase 1-like	gi|317106631|dbj|BAJ53137.1|JHL05D22.8 [Jatropha curcas]
TR53915|c0_g1_i1	4.71	11.31	4.04	0.48	0.45	0.33	20.22	aspartate semialdehyde	gi|317106613|dbj|BAJ53120.1|JHL07K02.10 [Jatropha curcas]
TR53915|c0_g1_i2	5.25	11.23	4.57	0.22	0.31	0.15	19.67	aspartate semialdehyde	gi|317106613|dbj|BAJ53120.1|JHL07K02.10 [Jatropha curcas]
TR53915|c0_g1_i3	7	15.2	3.85	0.85	1.03	0.08	26.97	aspartate semialdehyde	gi|317106613|dbj|BAJ53120.1|JHL07K02.10 [Jatropha curcas]
TR62745|c0_g1_i1	8.63	6.27	6.33	4.53	4.27	3.85	6.77	transferring glycosyl	gi|317106610|dbj|BAJ53117.1|JHL07K02.7 [Jatropha curcas]
TR62745|c0_g1_i4	7.69	5.11	5.72	3	2.83	4.85	6.45	transferring glycosyl	gi|317106610|dbj|BAJ53117.1|JHL07K02.7 [Jatropha curcas]
TR64647|c0_g1_i2	10.41	7.8	12.25	10.05	7.06	8.46	5.57	protein	gi|317106596|dbj|BAJ53104.1|JHL20J20.11 [Jatropha curcas]
TR61156|c0_g1_i1	13.41	12.16	20.78	50.73	32.35	53.06	22.36	lateral signaling target protein	gi|317106594|dbj|BAJ53102.1|JHL20J20.9 [Jatropha curcas]
TR69891|c0_g1_i1	0.04	0.04	1.67	3.3	0.35	5.96	0.15	subtilisin-like serine endopeptidase-like protein	gi|317106589|dbj|BAJ53097.1|JHL20J20.3 [Jatropha curcas]
TR70272|c0_g1_i3	0.12	0	1.22	2.73	0.18	5.29	0.16	subtilisin-like protease-like	gi|317106589|dbj|BAJ53097.1|JHL20J20.3 [Jatropha curcas]
TR65744|c0_g1_i6	7.61	6.04	2.78	2.07	3.51	2.03	2.32	fructose-6-phosphate 2-kinase fructose- -bisphosphatase	gi|3170230|gb|AAC18055.1|fructose-6-phosphate 2-kinase /fructose-2,6-bisphosphatase [Spinacia oleracea]
TR65153|c0_g6_i2	0.75	0.95	1.18	10.35	3.29	0.63	0.99	nadh dehydrogenase subunit 4	gi|316996017|dbj|BAD83480.2|NADH dehydrogenase subunit 4 (mitochondrion) [Nicotiana tabacum]
TR68433|c1_g1_i2	0.47	0.45	0.42	8.08	2.13	0.26	1.05	nadh dehydrogenase subunit 2	gi|316996002|dbj|BAD83439.2|NADH dehydrogenase subunit 2 (mitochondrion) [Nicotiana tabacum]
TR34150|c0_g1_i1	2.16	1.04	3.31	2.4	4.83	3.83	33.83	transcription factor	gi|316890746|gb|ADU56819.1|MADS-box protein AGL2 subfamily [Coffea arabica]
C911521	5.62	6.67	25.2	11.83	11.13	6.2	8.94	gpi-anchored protein	gi|315937292|gb|ADU56196.1|hypothetical protein [Jatropha curcas]
TR52322|c0_g2_i1	76.88	57.27	206.9	65.64	102.06	79.7	84.14	nadh dehydrogenase	gi|315937238|gb|ADU56177.1|hypothetical protein [Jatropha curcas]
Mj_1_GCCAAT_L005_R1_001_(paired)_trimmed_(paired)_contig_10313	34.67	29.55	69.36	52.01	54.54	42.17	38.25	hypothetical protein	gi|315937234|gb|ADU56175.1|hypothetical protein [Jatropha curcas]
scaffold10964	24.14	19.45	43.34	32.33	32.94	29.65	29.31	hypothetical protein	gi|315937234|gb|ADU56175.1|hypothetical protein [Jatropha curcas]
TR39048|c0_g1_i2	0	0.24	0.58	0.59	0.74	0.96	11.08	myb transcription factor eobii	gi|315177951|gb|ADT82939.1|non-opening 1 [Nicotiana attenuata]
TR64645|c0_g3_i2	0.27	0	0.94	22.69	16.21	0.88	0	conserved protein	gi|315078257|gb|EFT50296.1|hypothetical protein HMPREF9565_01483 [Propionibacterium acnes HL053PA2]
TR64645|c0_g4_i5	0	0	0	5.03	4.34	0	0	pg1 homology to homo sapiens	gi|315078257|gb|EFT50296.1|hypothetical protein HMPREF9565_01483 [Propionibacterium acnes HL053PA2]
TR59317|c2_g1_i2	0	0	0	2.64	5.39	1.23	0	tubulin beta-2c chain	gi|314998968|gb|ADT65425.1|beta-tubulin [Ignatius tetrasporus]
TR62104|c0_g2_i3	0	0.38	0.23	7.5	15.3	0	0	cell wall-associated hydrolase	gi|314916672|gb|EFS80503.1|hypothetical protein HMPREF9597_00208 [Propionibacterium acnes HL005PA4]
TR62104|c1_g1_i2	0	0	0.66	19.45	24.42	0.82	0	cell wall-associated hydrolase	gi|314916672|gb|EFS80503.1|hypothetical protein HMPREF9597_00208 [Propionibacterium acnes HL005PA4]
TR62104|c1_g1_i7	0	0	0	7.51	4.61	0.68	0	conserved protein	gi|314916672|gb|EFS80503.1|hypothetical protein HMPREF9597_00208 [Propionibacterium acnes HL005PA4]
C944340	0	0	0	0	0	0.16	15.03	sepallata1-like protein	gi|313907147|gb|ADR83588.1|Sepallata 1-like protein [Platanus x acerifolia]
TR63683|c6_g2_i1	19.02	12.65	30.85	29.39	32.69	28.61	27.43	at1g08480 t27g7_10	gi|313586603|gb|ADR71312.1|hypothetical protein 33 [Hevea brasiliensis]
Mj_1_GCCAAT_L005_R1_001_(paired)_trimmed_(paired)_contig_2264	87.79	56.83	116.25	86.1	114.65	82.2	73.73	protein	gi|313586601|gb|ADR71311.1|40S ribosomal protein S12A [Hevea brasiliensis]
TR53739|c0_g1_i1	179.94	93.22	201.88	121.1	148.38	119.01	120.94	protein	gi|313586601|gb|ADR71311.1|40S ribosomal protein S12A [Hevea brasiliensis]
scaffold13954	47.61	25.19	50.67	37.72	39.35	28.93	34.07	protein	gi|313586601|gb|ADR71311.1|40S ribosomal protein S12A [Hevea brasiliensis]
scaffold13955	64.85	35.03	75.21	44.96	52.88	40.86	41.83	protein	gi|313586601|gb|ADR71311.1|40S ribosomal protein S12A [Hevea brasiliensis]
Mj_1_GCCAAT_L005_R1_001_(paired)_trimmed_(paired)_contig_12327	19.46	15.62	37.75	32.61	45.18	42.49	28.19	hypothetical protein 32	gi|313586599|gb|ADR71310.1|hypothetical protein 32 [Hevea brasiliensis]
TR48264|c0_g1_i1	37.4	29.79	82.92	68.54	98.86	87.61	63.24	hypothetical protein 32	gi|313586599|gb|ADR71310.1|hypothetical protein 32 [Hevea brasiliensis]
scaffold11123	10.79	10.05	28.59	22.05	33.66	35.7	24.85	hypothetical protein 32	gi|313586599|gb|ADR71310.1|hypothetical protein 32 [Hevea brasiliensis]
TR64002|c0_g1_i1	5.69	8.78	37.1	14.82	20.95	29.81	14.67	pinus taeda anonymous locus cl3702contig1_01 genomic sequence	gi|313586595|gb|ADR71308.1|hypothetical protein 30 [Hevea brasiliensis]
TR55611|c0_g1_i1	31.27	29.89	65.47	55.88	73.75	55.97	56.28	protein	gi|313586593|gb|ADR71307.1|hypothetical protein 29 [Hevea brasiliensis]
scaffold10975	15.21	14.09	36.88	27.27	35.01	33.76	28.19	cp protein	gi|313586593|gb|ADR71307.1|hypothetical protein 29 [Hevea brasiliensis]
scaffold11837	38.73	21.83	45.72	55.38	56.63	77.87	45.74	40s ribosomal protein	gi|313586561|gb|ADR71291.1|40S ribosomal protein S6A [Hevea brasiliensis]
TR57884|c0_g1_i1	137.97	84.14	188.03	154.75	159.33	121.72	119.67	40s ribosomal protein s5	gi|313586551|gb|ADR71286.1|40S ribosomal protein S5A [Hevea brasiliensis]
scaffold10237	128.75	75.24	178.76	136.18	146.53	115.03	116.69	40s ribosomal protein s5	gi|313586551|gb|ADR71286.1|40S ribosomal protein S5A [Hevea brasiliensis]
TR47946|c0_g1_i1	143.23	77.61	216.02	146.96	176.35	178.86	151.46	40s ribosomal protein s16	gi|313586545|gb|ADR71283.1|40S ribosomal protein S16A [Hevea brasiliensis]
TR59559|c0_g1_i1	550.46	223.97	653.7	594.33	776.34	543.9	406.8	60s ribosomal protein l17-2-like	gi|313586527|gb|ADR71274.1|60S ribosomal protein L17A [Hevea brasiliensis]
TR47165|c0_g1_i1	248.6	163.89	237.2	307.12	263.62	246.53	197.99	60s ribosomal protein l10	gi|313586525|gb|ADR71273.1|60S ribosomal protein L10B [Hevea brasiliensis]
scaffold1000	107.61	67.56	110.34	126.1	127.64	106.18	77.69	60s ribosomal protein l10-like	gi|313586525|gb|ADR71273.1|60S ribosomal protein L10B [Hevea brasiliensis]
TR55343|c0_g1_i1	330.23	177.52	433.14	314.61	447.54	318.89	291.69	60s ribosomal protein l10a	gi|313586521|gb|ADR71271.1|60S ribosomal protein L10aA [Hevea brasiliensis]
Mj_1_GCCAAT_L005_R1_001_(paired)_trimmed_(paired)_contig_2290	52.32	22.7	73.67	54.71	54.02	47.16	30.84	60s ribosomal protein l12	gi|313586509|gb|ADR71265.1|60S ribosomal protein L12A [Hevea brasiliensis]
TR52458|c0_g1_i1	28.58	14.31	39.47	30.4	33.03	23.32	25.29	50s ribosomal protein l33	gi|313586503|gb|ADR71262.1|50S ribosomal protein L33A [Hevea brasiliensis]
C961116	80.29	40.88	129.64	79.69	103.09	75.37	71.09	small nuclear ribonucleoprotein e	gi|313586495|gb|ADR71258.1|small nuclear ribonucleoprotein E [Hevea brasiliensis]
TR49501|c0_g1_i1	211.81	102.97	335.09	217.14	305.31	206.48	160.94	60s ribosomal protein l35a	gi|313586489|gb|ADR71255.1|60S ribosomal protein L35aA [Hevea brasiliensis]
TR53630|c1_g1_i1	212.26	99.67	300.41	265.28	399.58	379.61	276.81	40s ribosomal protein s15a	gi|313586479|gb|ADR71250.1|40S ribosomal protein S15C [Hevea brasiliensis]
TR21840|c0_g1_i1	156.77	98.6	283.03	110.26	132.95	91.03	118.88	60s ribosomal protein l34	gi|313586463|gb|ADR71242.1|60S ribosomal protein L34B [Hevea brasiliensis]
TR51225|c0_g1_i1	89.68	44.84	112.5	101.9	141.29	142.88	114.17	60s ribosomal protein l34	gi|313586463|gb|ADR71242.1|60S ribosomal protein L34B [Hevea brasiliensis]
Mj_1_GCCAAT_L005_R1_001_(paired)_trimmed_(paired)_contig_2861	121.57	50.92	106.17	86.17	102.12	71.46	67.61	60s ribosomal protein l5-like	gi|313586431|gb|ADR71226.1|60S ribosomal protein L5B [Hevea brasiliensis]
TR57201|c0_g1_i1	78.17	38.1	80.67	56.5	75.56	48.13	48.29	60s ribosomal protein l5-like	gi|313586429|gb|ADR71225.1|60S ribosomal protein L5A [Hevea brasiliensis]
Mj_1_GCCAAT_L005_R1_001_(paired)_trimmed_(paired)_contig_6486	111.8	118.5	18.84	10.21	15.82	6.66	26.65	30s ribosomal protein s13	gi|312985275|gb|ADR30788.1|chloroplast 30S ribosomal protein S13 [Hevea brasiliensis]
scaffold13522	61.51	66.62	11.81	6.5	9.68	4.55	13.28	30s ribosomal protein s13	gi|312985275|gb|ADR30788.1|chloroplast 30S ribosomal protein S13 [Hevea brasiliensis]
TR54186|c0_g1_i1	1.25	0	0.49	24.08	53.71	28.12	30.55	hypothetical protein 2	gi|312985267|gb|ADR30784.1|hypothetical protein 2 [Hevea brasiliensis]
TR67878|c0_g4_i2	3.73	3.37	6.09	1.98	3.16	2.67	6.9	shaggy-related protein kinase eta	gi|312282053|dbj|BAJ33892.1|unnamed protein product [Thellungiella halophila]
TR106792|c0_g1_i1	0	0	0	0	0	8.85	0	cytochrome c oxidase subunit iii	gi|312233428|ref|YP_004021830.1|cytochrome c oxidase subunit III [Opilio parietinus] gi|298677219|gb|ADI92912.1| cytochrome c oxidase subunit III [Opilio parietinus]
TR54698|c1_g1_i2	0	0	0	2.11	6.64	1.64	0	elongation factor 1-	gi|310877183|gb|ADP36952.1|hypothetical protein [Asterochloris sp. DA2]
TR54698|c1_g1_i3	0	0	0	1.83	5.9	0.18	0	translation elongation factor-1 alpha	gi|310877183|gb|ADP36952.1|hypothetical protein [Asterochloris sp. DA2]
Mj_1_GCCAAT_L005_R1_001_(paired)_trimmed_(paired)_contig_96080	0	0	0	2.38	6.43	0.21	0	hypothetical protein GLRG_11922	gi|310801883|gb|EFQ36776.1|hypothetical protein GLRG_11922 [Glomerella graminicola M1.001]
Mj_1_GCCAAT_L005_R1_001_(paired)_trimmed_(paired)_contig_105505	0	0	0	0	5.76	0	0	steroid monooxygenase	gi|310799712|gb|EFQ34605.1|HK97 family phage prohead protease [Glomerella graminicola M1.001]
TR21821|c0_g1_i1	0	0	0	1.53	6.61	0	0	cis3p	gi|310795969|gb|EFQ31430.1|covalently-linked cell wall protein [Glomerella graminicola M1.001]
Mj_1_GCCAAT_L005_R1_001_(paired)_trimmed_(paired)_contig_105441	0	0	0	0	5.55	0	0	duf636 domain protein	gi|310793713|gb|EFQ29174.1|glutathione-dependent formaldehyde-activating enzyme [Glomerella graminicola M1.001]
TR64882|c0_g2_i1	71.96	70.75	65.36	34.92	41.91	7.13	96.19	flavanone 3-hydroxylase	gi|309951612|gb|ADO95201.1|flavanone 3-hydroxylase [Litchi chinensis]
TR49481|c1_g2_i2	9.42	7.17	16.74	15.83	20.07	16.39	15.9	ap-2 complex subunit sigma-1	gi|30983940|gb|AAP40645.1|clathrin coat assembly protein [Gossypium barbadense]
TR64456|c2_g2_i1	2489.66	1451.57	2220	2068.53	2435.67	2320.47	1473.17	high mobility group family	gi|308569654|gb|ADO34793.1|high mobility group box 2 protein [Gossypium hirsutum]
TR57088|c0_g1_i1	3.17	69.48	140.6	22.43	28.64	0.97	104.55	xyloglucan endotransglucosylase hydrolase	gi|308229784|gb|ADO24300.1|xyloglucan endotransglucosylase/hydrolase [Gossypium hirsutum]
TR49167|c0_g1_i2	1.6	1.53	1.49	5.64	4.43	5.36	1.25	leunig-like protein	gi|308080181|ref|NP_001183236.1|uncharacterized protein LOC100501624 [Zea mays] gi|238010218|gb|ACR36144.1| unknown [Zea mays]
C904655	6.22	1.99	11.85	2.34	0.88	0.33	4.36	adp-ribosylation factor	gi|308044373|ref|NP_001183665.1|uncharacterized protein LOC100502259 [Zea mays] gi|238013762|gb|ACR37916.1| unknown [Zea mays] gi|413923564|gb|AFW63496.1| hypothetical protein ZEAMMB73_172210 [Zea mays]
Mj_1_GCCAAT_L005_R1_001_(paired)_trimmed_(paired)_contig_2588	21.09	33.43	7.27	5.44	6.15	7.6	12.16	carotenoid cleavage dioxygenase 1	gi|307592509|gb|ADN65332.1|carotenoid cleavage dioxygenase 1 [Manihot esculenta]
TR61657|c0_g1_i1	39.11	60.93	17.6	9.79	12.18	11.63	24.04	carotenoid cleavage dioxygenase 1	gi|307592509|gb|ADN65332.1|carotenoid cleavage dioxygenase 1 [Manihot esculenta]
scaffold10872	30.74	49.49	11.97	6.2	9.27	6.82	17.64	carotenoid cleavage dioxygenase 1	gi|307592509|gb|ADN65332.1|carotenoid cleavage dioxygenase 1 [Manihot esculenta]
scaffold10873	26.2	41.95	9.53	4.03	6.47	6.22	15.78	carotenoid cleavage dioxygenase 1	gi|307592509|gb|ADN65332.1|carotenoid cleavage dioxygenase 1 [Manihot esculenta]
TR71730|c0_g1_i1	11.8	8.62	6.09	6.3	4	6.53	5.71	biotin carboxyl carrier protein subunit	gi|307566894|gb|ADN52613.1|acetyl-CoA carboxylase BCCP subunit [Jatropha curcas]
TR71730|c0_g1_i2	5.64	4.26	2.21	2.43	1.94	1.57	2.44	chloroplast acetyl- carboxylase biotin-containing subunit	gi|307566894|gb|ADN52613.1|acetyl-CoA carboxylase BCCP subunit [Jatropha curcas]
Mj_1_GCCAAT_L005_R1_001_(paired)_trimmed_(paired)_contig_265	357.77	468.31	2408.91	293.12	570.82	53.85	1107.38	peroxidase	gi|307136213|gb|ADN34050.1|peroxidase [Cucumis melo subsp. melo]
TR56833|c1_g1_i1	187.01	249.43	1225.72	171.73	310.22	29.75	583.67	peroxidase	gi|307136213|gb|ADN34050.1|peroxidase [Cucumis melo subsp. melo]
Mj_1_GCCAAT_L005_R1_001_(paired)_trimmed_(paired)_contig_11501	6.28	4.77	7.09	6.31	4.8	6.41	8.34	acyl:coa ligase	gi|307136108|gb|ADN33954.1|4-coumarate-CoA ligase [Cucumis melo subsp. melo]
TR73885|c0_g4_i1	4.64	4.81	3.75	3.16	5.36	4.72	7.46	protein trigalactosyldiacylglycerol chloroplastic-like	gi|307135993|gb|ADN33851.1|ABC-transporter [Cucumis melo subsp. melo]
Mj_1_GCCAAT_L005_R1_001_(paired)_trimmed_(paired)_contig_5655	22.6	15.09	56.89	33.66	40.82	0.51	9.31	serine-threonine protein plant-	gi|307135855|gb|ADN33724.1|LRR-family protein [Cucumis melo subsp. melo]
TR62284|c0_g1_i1	24.38	18.16	60.32	34.46	43.37	0.76	9.11	serine-threonine protein plant-	gi|307135855|gb|ADN33724.1|LRR-family protein [Cucumis melo subsp. melo]
TR53155|c2_g2_i2	0	0	0	4.44	15.32	1.03	0	ubiquitin extension protein	gi|307111770|gb|EFN60004.1|hypothetical protein CHLNCDRAFT_48072 [Chlorella variabilis]
TR43341|c0_g1_i1	0	0	0	1.79	8.67	0.72	0	protein	gi|307111583|gb|EFN59817.1|hypothetical protein CHLNCDRAFT_29353 [Chlorella variabilis]
TR42432|c0_g1_i1	0	0	0	1.6	6.23	1.6	0	protein	gi|307111418|gb|EFN59652.1|hypothetical protein CHLNCDRAFT_133134 [Chlorella variabilis]
Mj_1_GCCAAT_L005_R1_001_(paired)_trimmed_(paired)_contig_92379	0	0	0	3.34	7.68	1.3	0	60s ribosomal protein l24	gi|307110971|gb|EFN59206.1|hypothetical protein CHLNCDRAFT_29622 [Chlorella variabilis]
Mj_1_GCCAAT_L005_R1_001_(paired)_trimmed_(paired)_contig_71686	0	0	0	1.44	6.57	0.67	0	60s ribosomal protein l37a	gi|307110271|gb|EFN58507.1|60S ribosomal protein L37a [Chlorella variabilis]
TR46287|c0_g1_i1	0	0	0	1.75	5.9	0.88	0	protein	gi|307109968|gb|EFN58205.1|hypothetical protein CHLNCDRAFT_30036 [Chlorella variabilis]
TR30362|c0_g1_i2	0	0	0	1.15	9.34	0.8	0	ribosomal protein s4	gi|307109802|gb|EFN58039.1|hypothetical protein CHLNCDRAFT_59606 [Chlorella variabilis]
TR54475|c1_g1_i1	0	0	0	1.3	8.15	0.91	0	40s ribosomal protein s18	gi|307109786|gb|EFN58023.1|40S ribosomal protein S18 [Chlorella variabilis]
TR54646|c0_g1_i2	0	0	0	1.73	5.99	0.61	0	40s ribosomal protein s30	gi|307109777|gb|EFN58014.1|hypothetical protein CHLNCDRAFT_142204 [Chlorella variabilis]
TR48836|c0_g1_i1	0	0	0	1.81	6.12	0.25	0	60s ribosomal protein l9	gi|307109400|gb|EFN57638.1|hypothetical protein CHLNCDRAFT_59621 [Chlorella variabilis]
Mj_1_GCCAAT_L005_R1_001_(paired)_trimmed_(paired)_contig_91289	0	0	0	1.74	7.37	1.01	0	10 kda photosystem ii polypeptide	gi|307107577|gb|EFN55819.1|hypothetical protein CHLNCDRAFT_35273 [Chlorella variabilis]
TR55067|c0_g1_i1	0	0	0	11.13	23.12	2.51	0.12	10 kda photosystem ii polypeptide	gi|307107577|gb|EFN55819.1|hypothetical protein CHLNCDRAFT_35273 [Chlorella variabilis]
TR49024|c0_g1_i1	0	0	0	1.54	7.03	0.77	0	expressed protein	gi|307107297|gb|EFN55540.1|expressed protein [Chlorella variabilis]
TR53982|c1_g1_i3	0	0	0	2.31	7.7	1.03	0	protein	gi|307106909|gb|EFN55153.1|hypothetical protein CHLNCDRAFT_35552 [Chlorella variabilis]
TR63185|c1_g1_i1	0	0	0	5.36	10.61	1.25	0	cold-regulated protein 1	gi|307106157|gb|EFN54404.1|hypothetical protein CHLNCDRAFT_135735 [Chlorella variabilis]
Mj_1_GCCAAT_L005_R1_001_(paired)_trimmed_(paired)_contig_41818	0	0	0	1.46	5.05	0.51	0	ran-family small gtpase	gi|307106020|gb|EFN54267.1|GTP-binding protein [Chlorella variabilis]
TR58051|c1_g1_i1	0	0	0	4.68	11.13	0.94	0	glycine decarboxylase multi-enzyme h subunit	gi|307105019|gb|EFN53270.1|hypothetical protein CHLNCDRAFT_32297 [Chlorella variabilis]
TR30134|c0_g1_i1	0	0	0	0.43	5.3	0.3	0	rna-binding protein	gi|307104990|gb|EFN53241.1|hypothetical protein CHLNCDRAFT_36589 [Chlorella variabilis]
TR58911|c0_g1_i1	0	0	0	8.98	15.4	2.09	0	photosystem i reaction center subunit n	gi|307104372|gb|EFN52626.1|hypothetical protein CHLNCDRAFT_32470 [Chlorella variabilis]
Mj_1_GCCAAT_L005_R1_001_(paired)_trimmed_(paired)_contig_89578	0	0	0	5.51	16.22	0.8	0	photosystem i reaction centre subunit iv	gi|307104098|gb|EFN52354.1|hypothetical protein CHLNCDRAFT_36926 [Chlorella variabilis]
TR55260|c0_g2_i1	0	0	0	6.66	11.29	0.37	0	photosystem i reaction centre subunit iv	gi|307104098|gb|EFN52354.1|hypothetical protein CHLNCDRAFT_36926 [Chlorella variabilis]
TR72428|c1_g1_i5	0	0	0	2.44	5.14	0.66	0	fructose bisphosphate aldolase	gi|307103579|gb|EFN51838.1|hypothetical protein CHLNCDRAFT_37179 [Chlorella variabilis]
Mj_1_GCCAAT_L005_R1_001_(paired)_trimmed_(paired)_contig_68094	0	0	0	6.74	3.55	0.56	0	33kda oxygen evolving protein of photosystem ii	gi|307103502|gb|EFN51761.1|hypothetical protein CHLNCDRAFT_32868 [Chlorella variabilis]
TR54881|c1_g1_i1	0	0	0	1.43	6.92	0.57	0	protein	gi|307103363|gb|EFN51624.1|hypothetical protein CHLNCDRAFT_37334 [Chlorella variabilis]
TR61147|c1_g1_i2	72.06	49.45	112.07	158.09	189.71	276.59	95.04	14-3-3-like protein gf14 lambda	gi|30698122|ref|NP_851274.1|14-3-3-like protein GF14 kappa [Arabidopsis thaliana] gi|12643286|sp|P48348.2|14338_ARATH RecName: Full=14-3-3-like protein GF14 kappa; AltName: Full=General regulatory factor 8 gi|5802794|gb|AAD51783.1|AF145300_1 14-3-3 protein GF14 kappa [Arabidopsis thaliana] gi|15293125|gb|AAK93673.1| putative 14-3-3 protein GF14kappa grf8 [Arabidopsis thaliana] gi|19310701|gb|AAL8…
TR70845|c1_g1_i2	21.29	19.73	38.28	19.24	25.77	21.71	26.01	uncharacterized protein	gi|30680359|ref|NP_850535.1|uncharacterized protein [Arabidopsis thaliana] gi|17065402|gb|AAL32855.1| Unknown protein [Arabidopsis thaliana] gi|20148611|gb|AAM10196.1| unknown protein [Arabidopsis thaliana] gi|21554046|gb|AAM63127.1| unknown [Arabidopsis thaliana] gi|332641045|gb|AEE74566.1| uncharacterized protein [Arabidopsis thaliana]
TR75084|c2_g4_i2	8.56	7.38	12.51	8.99	13.42	8.59	11.3	uncharacterized protein	gi|30680359|ref|NP_850535.1|uncharacterized protein [Arabidopsis thaliana] gi|17065402|gb|AAL32855.1| Unknown protein [Arabidopsis thaliana] gi|20148611|gb|AAM10196.1| unknown protein [Arabidopsis thaliana] gi|21554046|gb|AAM63127.1| unknown [Arabidopsis thaliana] gi|332641045|gb|AEE74566.1| uncharacterized protein [Arabidopsis thaliana]
TR57423|c0_g1_i1	2.07	1.52	6.52	3.4	3.81	4.25	4.16	somatic embryogenesis receptor-like kinase	gi|306489670|gb|ADM94278.1|somatic embryogenesis receptor-like kinase [Rosa canina]
TR57423|c0_g1_i3	3.68	2.43	7.42	4.47	3.84	7.1	4.69	somatic embryogenesis receptor kinase 1	gi|306489670|gb|ADM94278.1|somatic embryogenesis receptor-like kinase [Rosa canina]
TR65360|c3_g2_i3	66.17	132.23	153.61	62.11	33.84	11.96	87.44	polyubiquitin containing 7 ubiquitin monomers	gi|30523391|gb|AAP31578.1|ubiquitin [Hevea brasiliensis]
TR61991|c0_g1_i1	0.91	0.54	0.6	26.52	25.01	0.19	11.13	flavonoid 3 -hydroxylase	gi|30421433|gb|AAP31058.1|flavonoid 3',5'-hydroxylase [Gossypium hirsutum]
TR60021|c0_g1_i1	0	0	0	2.54	12.16	0.65	0	subunit of the chloroplast cytochrome b6f complex	gi|303283764|ref|XP_003061173.1|cytochrome b6-f complex subunit [Micromonas pusilla CCMP1545] gi|226457524|gb|EEH54823.1| cytochrome b6-f complex subunit [Micromonas pusilla CCMP1545]
scaffold14033	0	0	0	7.12	8.39	0.25	0	alcohol dehydrogenase 1	gi|302899964|ref|XP_003048166.1|predicted protein [Nectria haematococca mpVI 77-13-4] gi|256729098|gb|EEU42453.1| predicted protein [Nectria haematococca mpVI 77-13-4]
TR50871|c0_g2_i2	0	0	0	1.05	5.61	0	0	60s ribosomal protein	gi|302840792|ref|XP_002951942.1|component of cytosolic 80S ribosome and 60S large subunit [Volvox carteri f. nagariensis] gi|300262843|gb|EFJ47047.1| component of cytosolic 80S ribosome and 60S large subunit [Volvox carteri f. nagariensis]
TR69841|c1_g1_i3	2.22	1.59	1.31	1.64	1.67	2.57	5.33	dihydropyrimidinase	gi|302838161|ref|XP_002950639.1|hypothetical protein VOLCADRAFT_60577 [Volvox carteri f. nagariensis] gi|300264188|gb|EFJ48385.1| hypothetical protein VOLCADRAFT_60577 [Volvox carteri f. nagariensis]
TR58580|c1_g1_i2	0	0	0	3.25	12.48	1.75	0	60s acidic ribosomal protein p2	gi|302838109|ref|XP_002950613.1|hypothetical protein VOLCADRAFT_120883 [Volvox carteri f. nagariensis] gi|300264162|gb|EFJ48359.1| hypothetical protein VOLCADRAFT_120883 [Volvox carteri f. nagariensis]
TR58912|c0_g4_i3	0	0	0	2.56	6.69	0.4	0	light-harvesting protein of photosystem i	gi|302837618|ref|XP_002950368.1|light harvesting complex a protein [Volvox carteri f. nagariensis] gi|5902598|gb|AAD55569.1|AF110787_1 light harvesting complex a protein [Volvox carteri f. nagariensis] gi|300264373|gb|EFJ48569.1| light harvesting complex a protein [Volvox carteri f. nagariensis]
TR58912|c1_g1_i2	0	0	0	5.03	11.77	0.79	0	light-harvesting protein of photosystem i	gi|302837618|ref|XP_002950368.1|light harvesting complex a protein [Volvox carteri f. nagariensis] gi|5902598|gb|AAD55569.1|AF110787_1 light harvesting complex a protein [Volvox carteri f. nagariensis] gi|300264373|gb|EFJ48569.1| light harvesting complex a protein [Volvox carteri f. nagariensis]
TR40833|c0_g1_i1	0	0	0	2	5.87	0.62	0	60s ribosomal protein l27	gi|302836371|ref|XP_002949746.1|component of cytosolic 80S ribosome and 60S large subunit [Volvox carteri f. nagariensis] gi|300265105|gb|EFJ49298.1| component of cytosolic 80S ribosome and 60S large subunit [Volvox carteri f. nagariensis]
TR57955|c0_g2_i3	0	0	0	4.5	10.03	1.86	0	light-harvesting chlorophyll-a b binding protein lhcb5	gi|302835678|ref|XP_002949400.1|hypothetical protein VOLCADRAFT_104309 [Volvox carteri f. nagariensis] gi|300265227|gb|EFJ49419.1| hypothetical protein VOLCADRAFT_104309 [Volvox carteri f. nagariensis]
Mj_1_GCCAAT_L005_R1_001_(paired)_trimmed_(paired)_contig_91897	0	0	0	2.8	5.94	0.33	0	thylakoid-bound ascorbate peroxidase	gi|302835670|ref|XP_002949396.1|hypothetical protein VOLCADRAFT_74218 [Volvox carteri f. nagariensis] gi|300265223|gb|EFJ49415.1| hypothetical protein VOLCADRAFT_74218 [Volvox carteri f. nagariensis]
TR52997|c1_g1_i2	0	0	0	1.14	5.37	0.8	0	60s ribosomal protein l31a	gi|302833585|ref|XP_002948356.1|component of cytosolic 80S ribosome and 60S large subunit [Volvox carteri f. nagariensis] gi|300266576|gb|EFJ50763.1| component of cytosolic 80S ribosome and 60S large subunit [Volvox carteri f. nagariensis]
Mj_1_GCCAAT_L005_R1_001_(paired)_trimmed_(paired)_contig_91670	0	0	0	0.67	5.27	0.63	0	protein	gi|302832948|ref|XP_002948038.1|component of cytosolic 80S ribosome and 40S small subunit [Volvox carteri f. nagariensis] gi|300266840|gb|EFJ51026.1| component of cytosolic 80S ribosome and 40S small subunit [Volvox carteri f. nagariensis]
TR32583|c0_g1_i1	0	0	0	2.1	6.43	0.37	0	protein	gi|302831245|ref|XP_002947188.1|component of cytosolic 80S ribosome and 40S small subunit [Volvox carteri f. nagariensis] gi|300267595|gb|EFJ51778.1| component of cytosolic 80S ribosome and 40S small subunit [Volvox carteri f. nagariensis]
TR72428|c0_g1_i2	0	0	0	3.63	6.44	0.82	0	fructose-bisphosphate aldolase	gi|302831241|ref|XP_002947186.1|hypothetical protein VOLCADRAFT_79447 [Volvox carteri f. nagariensis] gi|300267593|gb|EFJ51776.1| hypothetical protein VOLCADRAFT_79447 [Volvox carteri f. nagariensis]
TR49757|c1_g1_i1	0	0	0	2.59	6.5	0.8	0	40s ribosomal protein sa	gi|302830943|ref|XP_002947037.1|component of cytosolic 80S ribosome and 40S small subunit [Volvox carteri f. nagariensis] gi|300267444|gb|EFJ51627.1| component of cytosolic 80S ribosome and 40S small subunit [Volvox carteri f. nagariensis]
TR51547|c0_g1_i2	7.93	7.28	9	8.76	15.67	13.62	7.98	fertilization-independent endosperm protein	gi|302800570|ref|XP_002982042.1|hypothetical protein SELMODRAFT_179301 [Selaginella moellendorffii] gi|300150058|gb|EFJ16710.1| hypothetical protein SELMODRAFT_179301 [Selaginella moellendorffii]
scaffold11135	4.99	5.15	9.54	11.41	17.45	10.18	8.72	mps one binder kinase activator-like 1a	gi|302773131|ref|XP_002969983.1|hypothetical protein SELMODRAFT_231406 [Selaginella moellendorffii] gi|302799388|ref|XP_002981453.1| hypothetical protein SELMODRAFT_233736 [Selaginella moellendorffii] gi|300150993|gb|EFJ17641.1| hypothetical protein SELMODRAFT_233736 [Selaginella moellendorffii] gi|300162494|gb|EFJ29107.1| hypothetical protein SELMODRAFT_231406 [Selaginella moellendorffii]
scaffold11136	2.6	2.21	4.75	5.9	5.4	4.26	3.33	mps one binder kinase activator-like 1a	gi|302773131|ref|XP_002969983.1|hypothetical protein SELMODRAFT_231406 [Selaginella moellendorffii] gi|302799388|ref|XP_002981453.1| hypothetical protein SELMODRAFT_233736 [Selaginella moellendorffii] gi|300150993|gb|EFJ17641.1| hypothetical protein SELMODRAFT_233736 [Selaginella moellendorffii] gi|300162494|gb|EFJ29107.1| hypothetical protein SELMODRAFT_231406 [Selaginella moellendorffii]
TR69540|c2_g2_i4	4.9	2.6	4.7	2.59	3.79	4.22	5.72	anaphase-promoting complex subunit 11	gi|302595936|sp|Q9M9L0.2|APC11_ARATHRecName: Full=Anaphase-promoting complex subunit 11; AltName: Full=Cyclosome subunit 11 gi|16197625|gb|AAL13436.1| anaphase promoting complex subunit 11 [Arabidopsis thaliana]
TR69540|c2_g2_i9	10.69	6.25	11.08	8.36	8.11	10.45	10.7	anaphase-promoting complex subunit 11	gi|302595936|sp|Q9M9L0.2|APC11_ARATHRecName: Full=Anaphase-promoting complex subunit 11; AltName: Full=Cyclosome subunit 11 gi|16197625|gb|AAL13436.1| anaphase promoting complex subunit 11 [Arabidopsis thaliana]
Mj_1_GCCAAT_L005_R1_001_(paired)_trimmed_(paired)_contig_84721	0	0	0	7.82	19.2	0	3.24	glucose-repressible protein	gi|302416907|ref|XP_003006285.1|glucose-repressible gene protein [Verticillium albo-atrum VaMs.102] gi|261355701|gb|EEY18129.1| glucose-repressible gene protein [Verticillium albo-atrum VaMs.102]
Mj_1_GCCAAT_L005_R1_001_(paired)_trimmed_(paired)_contig_20070	7.29	8.26	0.27	4.35	6.83	4.06	1.69	zinc finger protein	gi|302398661|gb|ADL36625.1|C2H2L domain class transcription factor [Malus x domestica]
Mj_1_GCCAAT_L005_R1_001_(paired)_trimmed_(paired)_contig_7125	7.94	7.5	7.27	10.91	13.36	15.87	8.32	bzip protein	gi|302398613|gb|ADL36601.1|BZIP domain class transcription factor [Malus x domestica]
TR67203|c0_g1_i5	0	0	0	2.12	5.73	0	0	elongation factor 1-alpha	gi|3023693|sp|Q00251.1|EF1A_AURPURecName: Full=Elongation factor 1-alpha; Short=EF-1-alpha gi|643455|gb|AAA91636.1| translation elongation factor 1-alpha [Aureobasidium pullulans]
TR59445|c0_g3_i1	4.81	6.7	25.75	103.03	26.59	66.34	15.17	inorganic phosphate	gi|302353424|gb|ADL27918.1|phosphate transporter 1 [Hevea brasiliensis]
TR50952|c0_g1_i3	119.6	608.83	0.39	0.53	0.12	4.17	0.41	aquaporin pip2-7	gi|302320873|gb|ADL16407.1|aquaporin [Dianthus caryophyllus] gi|379067426|gb|AFC90119.1| pip2 [Dianthus caryophyllus]
TR54772|c1_g1_i1	122.36	643.13	0.48	0.52	0	4	0.16	aquaporin pip2-7	gi|302320873|gb|ADL16407.1|aquaporin [Dianthus caryophyllus] gi|379067426|gb|AFC90119.1| pip2 [Dianthus caryophyllus]
TR58072|c0_g1_i1	1.4	2.17	3.31	15.5	8.95	5.87	10.31	saur family protein	gi|302143962|emb|CBI23067.3|unnamed protein product [Vitis vinifera]
TR70503|c0_g3_i10	5.7	5.06	3.89	3.03	4.35	4.52	4.41	skp1-like protein 21-like	gi|302143834|emb|CBI22695.3|unnamed protein product [Vitis vinifera]
TR73788|c0_g4_i1	3.65	2.32	4.95	3.87	4.15	2.83	5.25	shaggy-related protein kinase iota	gi|302143450|emb|CBI22011.3|unnamed protein product [Vitis vinifera]
TR66089|c0_g1_i7	4.08	2.35	8.65	0.43	1.21	0.9	1.87	tpr repeat-containing thioredoxin ttl1-like	gi|302143417|emb|CBI21978.3|unnamed protein product [Vitis vinifera]
TR75170|c1_g1_i3	1.32	1.75	4.85	4.68	4.55	5.83	2.51	natural resistance-associated macrophage protein	gi|302142234|emb|CBI19437.3|unnamed protein product [Vitis vinifera]
TR75170|c1_g1_i4	2.05	1.96	5.3	3.24	2.44	3.85	2.82	natural resistance-associated macrophage protein	gi|302142234|emb|CBI19437.3|unnamed protein product [Vitis vinifera]
TR55551|c0_g1_i3	8.04	6.62	9.04	9.68	20.62	12.2	14.07	protein	gi|302142034|emb|CBI19237.3|unnamed protein product [Vitis vinifera]
TR75198|c0_g2_i5	66.39	59.57	17.41	2.85	4.68	1.55	13.83	thylakoid lumenal 29 kda chloroplastic-like	gi|302141995|emb|CBI19198.3|unnamed protein product [Vitis vinifera]
TR75198|c0_g2_i6	28.7	28.72	7.73	1.53	2.97	1.53	7.65	seryl-trna synthetase	gi|302141995|emb|CBI19198.3|unnamed protein product [Vitis vinifera]
TR33295|c0_g1_i2	0	0	0	10.33	0.26	0	2.87	flowering locus t	gi|302140575|gb|ADK95113.1|flowering locus T-like protein [Gossypium hirsutum] gi|363498047|gb|AEW24444.1| flowering locus T-like protein 1 [Gossypium barbadense]
TR48853|c0_g1_i3	821.08	22.69	323.39	24.34	47.92	22.76	215.23	histone h3	gi|300681467|emb|CBH32561.1|histone H3, expressed [Triticum aestivum] gi|326487534|dbj|BAJ89751.1| predicted protein [Hordeum vulgare subsp. vulgare] gi|326489785|dbj|BAK01873.1| predicted protein [Hordeum vulgare subsp. vulgare] gi|326502060|dbj|BAK06522.1| predicted protein [Hordeum vulgare subsp. vulgare] gi|326518594|dbj|BAJ88326.1| predicted protein [Hordeum vulgare subsp. vulgare] gi|326520…
TR51364|c0_g1_i1	1192.42	36.67	640.55	57.29	104.42	66.56	381.89	histone h3	gi|300681467|emb|CBH32561.1|histone H3, expressed [Triticum aestivum] gi|326487534|dbj|BAJ89751.1| predicted protein [Hordeum vulgare subsp. vulgare] gi|326489785|dbj|BAK01873.1| predicted protein [Hordeum vulgare subsp. vulgare] gi|326502060|dbj|BAK06522.1| predicted protein [Hordeum vulgare subsp. vulgare] gi|326518594|dbj|BAJ88326.1| predicted protein [Hordeum vulgare subsp. vulgare] gi|326520…
TR73568|c1_g2_i1	7.52	7.17	15.58	7.98	7.97	4.91	7.13	aspartic proteinase nepenthesin-1-like	gi|300078619|gb|ADJ67210.1|aspartic proteinase nepenthesin-1 precursor [Jatropha curcas]
TR79535|c0_g2_i5	4.66	3.16	3.52	4.88	5.55	10.82	3.39	protein	gi|298205222|emb|CBI17281.3|unnamed protein product [Vitis vinifera]
TR69828|c0_g1_i6	2.88	2.51	4.01	5.37	5.83	7.51	1.8	mitochondrial inner membrane translocase subunit tim44-related protein	gi|298205045|emb|CBI34352.3|unnamed protein product [Vitis vinifera]
scaffold1171	51.54	23.53	62.86	52.73	71.38	45.87	48.33	40s ribosomal protein	gi|298204905|emb|CBI34212.3|unnamed protein product [Vitis vinifera]
Mj_1_GCCAAT_L005_R1_001_(paired)_trimmed_(paired)_contig_44738	0.18	0	0	2.3	1.63	5.64	0.18	transcription factor une12-like	gi|298204851|emb|CBI34158.3|unnamed protein product [Vitis vinifera]
TR62605|c1_g1_i3	7.84	3.76	1.44	0	0	0.27	2.89	pinus taeda anonymous locus umn_3055_01 genomic sequence	gi|298204391|emb|CBI16871.3|unnamed protein product [Vitis vinifera]
TR61917|c0_g1_i3	1.75	4.7	3.35	7.49	5.42	8.17	5.19	histidine phosphotransfer protein	gi|298103712|emb|CBM42557.1|putative histidine phosphotransfer protein 9 [Populus x canadensis]
TR59869|c0_g1_i1	64.8	38	26.33	18.25	14.31	12.48	19.88	protein	gi|297851884|ref|XP_002893823.1|EMB3003 [Arabidopsis lyrata subsp. lyrata] gi|297339665|gb|EFH70082.1| EMB3003 [Arabidopsis lyrata subsp. lyrata]
TR58481|c0_g1_i2	16.57	13.84	13.67	17.3	26.27	17.08	24.71	peptidyl-prolyl cis-trans isomerase-like 3	gi|297848310|ref|XP_002892036.1|peptidyl-prolyl cis-trans isomerase cyclophilin-type family protein [Arabidopsis lyrata subsp. lyrata] gi|297337878|gb|EFH68295.1| peptidyl-prolyl cis-trans isomerase cyclophilin-type family protein [Arabidopsis lyrata subsp. lyrata]
TR70832|c0_g1_i1	8.88	9.43	27.49	20.35	23.84	22.26	17.51	hypothetical protein ARALYDRAFT_888210	gi|297843764|ref|XP_002889763.1|hypothetical protein ARALYDRAFT_888210 [Arabidopsis lyrata subsp. lyrata] gi|297335605|gb|EFH66022.1| hypothetical protein ARALYDRAFT_888210 [Arabidopsis lyrata subsp. lyrata]
TR49744|c1_g1_i1	523.29	256.74	357.09	453.54	241.75	277.62	622.05	polyubiquitin	gi|297841025|ref|XP_002888394.1|hexaubiquitin protein [Arabidopsis lyrata subsp. lyrata] gi|297334235|gb|EFH64653.1| hexaubiquitin protein [Arabidopsis lyrata subsp. lyrata]
TR63359|c1_g1_i2	2.48	3.46	0.8	3.21	2.35	5.49	2	er lumen protein retaining receptor	gi|297831374|ref|XP_002883569.1|hypothetical protein ARALYDRAFT_480012 [Arabidopsis lyrata subsp. lyrata] gi|297329409|gb|EFH59828.1| hypothetical protein ARALYDRAFT_480012 [Arabidopsis lyrata subsp. lyrata]
TR51220|c1_g1_i1	1.89	2.7	3.13	3.55	3.09	3.06	5	ca2+-transporting atpase	gi|297830818|ref|XP_002883291.1|Ca2+-transporting ATPase [Arabidopsis lyrata subsp. lyrata] gi|297329131|gb|EFH59550.1| Ca2+-transporting ATPase [Arabidopsis lyrata subsp. lyrata]
TR68978|c0_g1_i1	4.63	3.56	7.14	4.09	3.41	4.46	5.26	probable dolichyl pyrophosphate glc1man9 c2 alpha- -glucosyltransferase-like	gi|297828181|ref|XP_002881973.1|hypothetical protein ARALYDRAFT_903892 [Arabidopsis lyrata subsp. lyrata] gi|297327812|gb|EFH58232.1| hypothetical protein ARALYDRAFT_903892 [Arabidopsis lyrata subsp. lyrata]
Mj_1_GCCAAT_L005_R1_001_(paired)_trimmed_(paired)_contig_5325	10.69	3.45	6.11	1.75	2.59	1.75	6.51	protein argonaute 4	gi|297825985|ref|XP_002880875.1|hypothetical protein ARALYDRAFT_481584 [Arabidopsis lyrata subsp. lyrata] gi|297326714|gb|EFH57134.1| hypothetical protein ARALYDRAFT_481584 [Arabidopsis lyrata subsp. lyrata]
TR79118|c0_g1_i4	4.17	4.63	3.11	4.3	5.03	7.53	5.51	embryo defective 2410 protein	gi|297825619|ref|XP_002880692.1|hypothetical protein ARALYDRAFT_901212 [Arabidopsis lyrata subsp. lyrata] gi|297326531|gb|EFH56951.1| hypothetical protein ARALYDRAFT_901212 [Arabidopsis lyrata subsp. lyrata]
TR72250|c1_g4_i10	5.41	3.23	1.82	2.3	1.78	1.95	2.9	pseudouridine synthase family protein	gi|297823807|ref|XP_002879786.1|pseudouridine synthase family protein [Arabidopsis lyrata subsp. lyrata] gi|297325625|gb|EFH56045.1| pseudouridine synthase family protein [Arabidopsis lyrata subsp. lyrata]
TR77128|c1_g1_i7	6.02	8.36	2.16	0.53	1	0.28	2.31	hypothetical protein ARALYDRAFT_900555	gi|297821333|ref|XP_002878549.1|hypothetical protein ARALYDRAFT_900555 [Arabidopsis lyrata subsp. lyrata] gi|297324388|gb|EFH54808.1| hypothetical protein ARALYDRAFT_900555 [Arabidopsis lyrata subsp. lyrata]
Mj_1_GCCAAT_L005_R1_001_(paired)_trimmed_(paired)_contig_4737	8.55	0.37	5.6	1.24	0.58	1.3	4.89	deoxyuridine 5 -triphosphate nucleotidohydrolase-like	gi|297819298|ref|XP_002877532.1|hypothetical protein ARALYDRAFT_905922 [Arabidopsis lyrata subsp. lyrata] gi|297323370|gb|EFH53791.1| hypothetical protein ARALYDRAFT_905922 [Arabidopsis lyrata subsp. lyrata]
TR40474|c0_g6_i1	10.85	13.99	23.88	43.72	18.65	25.17	14.03	udp-glucose dehydrogenase	gi|297818586|ref|XP_002877176.1|hypothetical protein ARALYDRAFT_905242 [Arabidopsis lyrata subsp. lyrata] gi|297323014|gb|EFH53435.1| hypothetical protein ARALYDRAFT_905242 [Arabidopsis lyrata subsp. lyrata]
TR79594|c3_g2_i3	10.58	5.86	5.26	7.81	8.05	16.1	13.64	cullin 1	gi|297814051|ref|XP_002874909.1|ATCUL1 [Arabidopsis lyrata subsp. lyrata] gi|297320746|gb|EFH51168.1| ATCUL1 [Arabidopsis lyrata subsp. lyrata]
TR79701|c2_g3_i4	35.9	26.45	27.98	23.95	26.23	29.53	30.41	cullin 1	gi|297814051|ref|XP_002874909.1|ATCUL1 [Arabidopsis lyrata subsp. lyrata] gi|297320746|gb|EFH51168.1| ATCUL1 [Arabidopsis lyrata subsp. lyrata]
Mj_1_GCCAAT_L005_R1_001_(paired)_trimmed_(paired)_contig_12118	44	31.17	35.23	32.98	26.38	32.33	33.96	tcp-1 cpn60 chaperonin family protein	gi|297812853|ref|XP_002874310.1|hypothetical protein ARALYDRAFT_489475 [Arabidopsis lyrata subsp. lyrata] gi|297320147|gb|EFH50569.1| hypothetical protein ARALYDRAFT_489475 [Arabidopsis lyrata subsp. lyrata]
TR56343|c0_g1_i3	6.22	4.47	7.72	8.05	9.54	8.58	8.24	dna binding	gi|297810879|ref|XP_002873323.1|predicted protein [Arabidopsis lyrata subsp. lyrata] gi|297319160|gb|EFH49582.1| predicted protein [Arabidopsis lyrata subsp. lyrata]
TR64906|c1_g1_i4	4.16	3.46	6.38	5.44	4.05	4.81	3.03	abc transporter family protein	gi|297810323|ref|XP_002873045.1|non-intrinsic abc protein 9 [Arabidopsis lyrata subsp. lyrata] gi|297318882|gb|EFH49304.1| non-intrinsic abc protein 9 [Arabidopsis lyrata subsp. lyrata]
Mj_1_GCCAAT_L005_R1_001_(paired)_trimmed_(paired)_contig_2508	18.23	19.46	19.66	50.33	27.11	19.56	14.65	polyubiquitin	gi|297809843|ref|XP_002872805.1|hypothetical protein ARALYDRAFT_490270 [Arabidopsis lyrata subsp. lyrata] gi|297318642|gb|EFH49064.1| hypothetical protein ARALYDRAFT_490270 [Arabidopsis lyrata subsp. lyrata]
Mj_1_GCCAAT_L005_R1_001_(paired)_trimmed_(paired)_contig_676	133.02	95.82	207.61	174.14	127.48	83.33	243.79	polyubiquitin	gi|297809843|ref|XP_002872805.1|hypothetical protein ARALYDRAFT_490270 [Arabidopsis lyrata subsp. lyrata] gi|297318642|gb|EFH49064.1| hypothetical protein ARALYDRAFT_490270 [Arabidopsis lyrata subsp. lyrata]
TR62295|c4_g2_i6	397.28	315.76	617.54	521.87	333.64	172.12	546.29	polyubiquitin	gi|297809843|ref|XP_002872805.1|hypothetical protein ARALYDRAFT_490270 [Arabidopsis lyrata subsp. lyrata] gi|297318642|gb|EFH49064.1| hypothetical protein ARALYDRAFT_490270 [Arabidopsis lyrata subsp. lyrata]
TR65360|c3_g2_i2	66.46	106.69	151.47	313.82	167.08	69.49	300.52	polyubiquitin	gi|297809843|ref|XP_002872805.1|hypothetical protein ARALYDRAFT_490270 [Arabidopsis lyrata subsp. lyrata] gi|297318642|gb|EFH49064.1| hypothetical protein ARALYDRAFT_490270 [Arabidopsis lyrata subsp. lyrata]
TR59976|c0_g1_i1	4.44	4.68	6.85	4.86	7.55	5.95	6.64	hypothetical protein ARALYDRAFT_488628	gi|297807783|ref|XP_002871775.1|hypothetical protein ARALYDRAFT_488628 [Arabidopsis lyrata subsp. lyrata] gi|297317612|gb|EFH48034.1| hypothetical protein ARALYDRAFT_488628 [Arabidopsis lyrata subsp. lyrata]
TR59976|c0_g1_i2	3.99	7.32	15.67	8.8	10.44	10.26	9.4	hypothetical protein ARALYDRAFT_488628	gi|297807783|ref|XP_002871775.1|hypothetical protein ARALYDRAFT_488628 [Arabidopsis lyrata subsp. lyrata] gi|297317612|gb|EFH48034.1| hypothetical protein ARALYDRAFT_488628 [Arabidopsis lyrata subsp. lyrata]
TR59976|c0_g1_i3	6.7	9.07	17.73	10.15	10.98	11.3	13.01	hypothetical protein ARALYDRAFT_488628	gi|297807783|ref|XP_002871775.1|hypothetical protein ARALYDRAFT_488628 [Arabidopsis lyrata subsp. lyrata] gi|297317612|gb|EFH48034.1| hypothetical protein ARALYDRAFT_488628 [Arabidopsis lyrata subsp. lyrata]
TR62338|c0_g1_i3	5.11	4.5	13.41	7.49	10.97	10.91	9.94	hypothetical protein ARALYDRAFT_488628	gi|297807783|ref|XP_002871775.1|hypothetical protein ARALYDRAFT_488628 [Arabidopsis lyrata subsp. lyrata] gi|297317612|gb|EFH48034.1| hypothetical protein ARALYDRAFT_488628 [Arabidopsis lyrata subsp. lyrata]
TR62338|c0_g1_i4	2.42	3.67	5.46	2.88	3.91	2.9	4.57	hypothetical protein ARALYDRAFT_488628	gi|297807783|ref|XP_002871775.1|hypothetical protein ARALYDRAFT_488628 [Arabidopsis lyrata subsp. lyrata] gi|297317612|gb|EFH48034.1| hypothetical protein ARALYDRAFT_488628 [Arabidopsis lyrata subsp. lyrata]
TR66807|c0_g1_i1	10.1	8.59	12.15	9.67	15.63	18.61	11.04	elongation factor family protein	gi|297807389|ref|XP_002871578.1|elongation factor family protein [Arabidopsis lyrata subsp. lyrata] gi|297317415|gb|EFH47837.1| elongation factor family protein [Arabidopsis lyrata subsp. lyrata]
TR56894|c1_g1_i1	10.46	10.49	2.01	0.45	0.32	0.63	2.67	short-chain dehydrogenase reductase sdr	gi|297806477|ref|XP_002871122.1|short-chain dehydrogenase/reductase family protein [Arabidopsis lyrata subsp. lyrata] gi|297316959|gb|EFH47381.1| short-chain dehydrogenase/reductase family protein [Arabidopsis lyrata subsp. lyrata]
TR57880|c0_g1_i1	6.66	6.98	14.22	7.26	7.45	4.38	9.43	cytokinin riboside 5 -monophosphate phosphoribohydrolase log5	gi|297802436|ref|XP_002869102.1|hypothetical protein ARALYDRAFT_912862 [Arabidopsis lyrata subsp. lyrata] gi|297314938|gb|EFH45361.1| hypothetical protein ARALYDRAFT_912862 [Arabidopsis lyrata subsp. lyrata]
TR68295|c1_g2_i3	4.97	5.22	4.69	2.76	2.26	1.8	4.34	iaa-amino acid hydrolase	gi|297793177|ref|XP_002864473.1|hypothetical protein ARALYDRAFT_495757 [Arabidopsis lyrata subsp. lyrata] gi|297310308|gb|EFH40732.1| hypothetical protein ARALYDRAFT_495757 [Arabidopsis lyrata subsp. lyrata]
TR67369|c2_g1_i1	3.76	3.59	6.65	8.19	10.99	11.25	5.38	hypothetical protein ARALYDRAFT_357185	gi|297792193|ref|XP_002863981.1|hypothetical protein ARALYDRAFT_357185 [Arabidopsis lyrata subsp. lyrata] gi|297309816|gb|EFH40240.1| hypothetical protein ARALYDRAFT_357185 [Arabidopsis lyrata subsp. lyrata]
scaffold10616	2.44	3.84	5.75	7.93	11.13	11.46	3.88	at1g73940 f2p9_19	gi|297792193|ref|XP_002863981.1|hypothetical protein ARALYDRAFT_357185 [Arabidopsis lyrata subsp. lyrata] gi|297309816|gb|EFH40240.1| hypothetical protein ARALYDRAFT_357185 [Arabidopsis lyrata subsp. lyrata]
TR59636|c0_g1_i1	33.1	31.62	86.62	36.48	70.58	43.86	72.58	ubiquitin-like protein 5	gi|297791835|ref|XP_002863802.1|ubiquitin family protein [Arabidopsis lyrata subsp. lyrata] gi|297309637|gb|EFH40061.1| ubiquitin family protein [Arabidopsis lyrata subsp. lyrata]
TR59636|c1_g2_i1	26.58	21.47	67.91	29	59.9	46.87	41.3	ubiquitin-like protein 5	gi|297791835|ref|XP_002863802.1|ubiquitin family protein [Arabidopsis lyrata subsp. lyrata] gi|297309637|gb|EFH40061.1| ubiquitin family protein [Arabidopsis lyrata subsp. lyrata]
TR71173|c1_g1_i1	2.48	2.74	2.02	3.02	2.56	6.76	1.5	amino acid transporter	gi|297789990|ref|XP_002862912.1|hypothetical protein ARALYDRAFT_359293 [Arabidopsis lyrata subsp. lyrata] gi|297308682|gb|EFH39171.1| hypothetical protein ARALYDRAFT_359293 [Arabidopsis lyrata subsp. lyrata]
TR63783|c0_g1_i1	3.62	7.3	8.31	43.14	51.76	54.53	24.03	mitogen-activated protein kinase 3	gi|297748119|gb|ADI52626.1|mitogen-activated protein kinase 3 [Gossypium hirsutum]
TR63783|c0_g1_i3	3.12	6.05	7.04	32.46	39.51	45.6	19.46	mitogen-activated protein kinase 3	gi|297748119|gb|ADI52626.1|mitogen-activated protein kinase 3 [Gossypium hirsutum]
TR66524|c1_g1_i2	3.16	6.94	2.42	2.26	2.13	0.35	3.74	myb-like protein	gi|297746469|emb|CBI16525.3|unnamed protein product [Vitis vinifera]
Mj_1_GCCAAT_L005_R1_001_(paired)_trimmed_(paired)_contig_14986	3.11	6.26	13.98	0.87	2.65	2.99	0.54	transcription factor jumonji domain-containing protein	gi|297746369|emb|CBI16425.3|unnamed protein product [Vitis vinifera]
TR69885|c1_g2_i3	3.95	7.96	13.67	1.26	4.9	4.64	0.89	transcription factor jumonji domain-containing protein	gi|297746369|emb|CBI16425.3|unnamed protein product [Vitis vinifera]
TR73328|c0_g1_i1	8.75	8.12	10.61	10.31	9.22	15.5	9.27	rna recognition motif-containing protein	gi|297746185|emb|CBI16241.3|unnamed protein product [Vitis vinifera]
TR46980|c0_g2_i1	0	0	1.06	0.57	0.27	0	6.94	3-ketoacyl- synthase	gi|297746148|emb|CBI16204.3|unnamed protein product [Vitis vinifera]
TR75283|c0_g2_i2	1.71	3.24	5.19	5.16	4.87	8.94	4.89	cral trio domain containing protein	gi|297746108|emb|CBI16164.3|unnamed protein product [Vitis vinifera]
Mj_1_GCCAAT_L005_R1_001_(paired)_trimmed_(paired)_contig_5174	15.6	10.08	9.64	7.76	12.98	13.12	13.36	zinc finger ccch domain-containing protein 40-like	gi|297745955|emb|CBI16011.3|unnamed protein product [Vitis vinifera]
TR55094|c0_g1_i2	5.07	5.04	4.57	14.58	11.32	16.45	5.11	zinc finger ccch domain-containing protein 40-like	gi|297745955|emb|CBI16011.3|unnamed protein product [Vitis vinifera]
TR71414|c0_g1_i3	2.5	2.51	2.36	2.83	3.02	3.02	5.11	protein	gi|297745884|emb|CBI15940.3|unnamed protein product [Vitis vinifera]
TR47867|c0_g1_i1	40.93	32.85	69.95	58.83	63.84	62.74	44.98	translation initiation factor eif-2 beta subunit	gi|297745750|emb|CBI15806.3|unnamed protein product [Vitis vinifera]
TR45763|c0_g1_i1	7.71	3.93	4.24	2.18	1.54	1.33	5.24	catalytic pyridoxal phosphate binding protein	gi|297745688|emb|CBI40973.3|unnamed protein product [Vitis vinifera]
Mj_1_GCCAAT_L005_R1_001_(paired)_trimmed_(paired)_contig_733	13.26	3.76	4.21	4.32	4.27	6.2	9.32	auxin response factor 11	gi|297745485|emb|CBI40565.3|unnamed protein product [Vitis vinifera]
TR37685|c0_g1_i1	108.16	63.06	166.28	74.71	108.17	58.95	80.91	60s ribosomal protein l36	gi|297745282|emb|CBI40362.3|unnamed protein product [Vitis vinifera]
TR54470|c0_g1_i2	14.52	9.33	5.58	5.25	6.23	5.43	4.11	50s ribosomal protein l18	gi|297744840|emb|CBI38108.3|unnamed protein product [Vitis vinifera]
TR47750|c0_g2_i3	2.07	5.46	0.3	0	0.77	0	2.29	3-hydroxybenzoate 6-hydroxylase 1-like	gi|297744589|emb|CBI37851.3|unnamed protein product [Vitis vinifera]
TR59605|c0_g1_i3	1.85	1.7	0.97	4.16	2.68	7.1	1.45	act-like protein tyrosine kinase family protein	gi|297744550|emb|CBI37812.3|unnamed protein product [Vitis vinifera]
TR59605|c0_g1_i4	2.37	2.81	0.55	5.08	2.26	7.82	1.37	act-like protein tyrosine kinase family protein	gi|297744550|emb|CBI37812.3|unnamed protein product [Vitis vinifera]
TR60126|c0_g4_i3	1.59	1.64	0.65	2.86	2.28	6	1.84	protein	gi|297744550|emb|CBI37812.3|unnamed protein product [Vitis vinifera]
TR78034|c0_g1_i6	3.75	2.87	4.16	3.87	4.86	6.73	3.78	calcium-binding ef-hand-containing protein	gi|297744473|emb|CBI37735.3|unnamed protein product [Vitis vinifera]
C964920	8.71	6.36	13.08	7.65	9.13	6.2	5.42	cmp-sialic acid	gi|297744466|emb|CBI37728.3|unnamed protein product [Vitis vinifera]
Mj_1_GCCAAT_L005_R1_001_(paired)_trimmed_(paired)_contig_9949	7.99	7.53	16.53	11.49	11.76	7.96	9.2	cmp-sialic acid	gi|297744466|emb|CBI37728.3|unnamed protein product [Vitis vinifera]
TR77186|c0_g2_i2	23.46	22.39	15.43	22.57	14.66	30.05	22.05	clip-associating protein	gi|297744270|emb|CBI37240.3|unnamed protein product [Vitis vinifera]
Mj_1_GCCAAT_L005_R1_001_(paired)_trimmed_(paired)_contig_10509	17.84	15.21	16.27	13.52	17.7	21.16	15.27	multidrug resistance protein abc transporter family	gi|297744248|emb|CBI37218.3|unnamed protein product [Vitis vinifera]
TR61183|c0_g1_i1	11.01	11.66	8.11	9.16	10.79	11.1	10.15	abc transporter c family member 5-like	gi|297744248|emb|CBI37218.3|unnamed protein product [Vitis vinifera]
TR79238|c0_g2_i3	5.17	8.75	5.02	5.54	4.06	3.73	4.46	glutathione s-transferase family protein	gi|297744206|emb|CBI37176.3|unnamed protein product [Vitis vinifera]
TR76179|c0_g1_i2	24.11	51.53	12.94	3.03	4.72	7.38	5.75	probable glutamyl chloroplastic-like	gi|297743980|emb|CBI36950.3|unnamed protein product [Vitis vinifera]
Mj_1_GCCAAT_L005_R1_001_(paired)_trimmed_(paired)_contig_3082	8.6	8.31	9.81	9.05	9.89	15.09	11.98	protein far1-related sequence 6-like	gi|297743489|emb|CBI36356.3|unnamed protein product [Vitis vinifera]
C972360	4.68	3.11	4.65	3.91	5.19	6.24	7.19	protein far1-related sequence 6-like	gi|297743488|emb|CBI36355.3|unnamed protein product [Vitis vinifera]
TR76187|c0_g4_i1	5.25	3.38	4.47	2.95	3.61	3.74	4.15	brca1 brca2-containing complex subunit 3	gi|297743401|emb|CBI36268.3|unnamed protein product [Vitis vinifera]
TR79204|c1_g1_i7	2.26	1	3.07	3.58	10.11	6.16	6.16	eukaryotic protein	gi|297743237|emb|CBI36104.3|unnamed protein product [Vitis vinifera]
TR76589|c0_g1_i2	9.32	9.26	6.02	5.5	1.91	7.7	7.2	nuclear poly polymerase	gi|297743180|emb|CBI36047.3|unnamed protein product [Vitis vinifera]
Mj_1_GCCAAT_L005_R1_001_(paired)_trimmed_(paired)_contig_40696	0.32	0.15	0.19	1.27	7.17	2.66	1.58	puromycin-sensitive aminopeptidase-like	gi|297743057|emb|CBI35924.3|unnamed protein product [Vitis vinifera]
Mj_1_GCCAAT_L005_R1_001_(paired)_trimmed_(paired)_contig_4826	7.4	6.54	5.58	8.41	5.71	10.11	10.18	oligouridylate binding protein 1b	gi|297742974|emb|CBI35841.3|unnamed protein product [Vitis vinifera]
TR76403|c3_g1_i1	5.62	2.87	4.19	3.86	3.08	4.98	7.2	transcription factor	gi|297742957|emb|CBI35824.3|unnamed protein product [Vitis vinifera]
TR73723|c0_g1_i3	0.68	2.38	1.06	1.43	2.35	0.25	7.78	receptor-like serine threonine-protein kinase sd1-8-like	gi|297742753|emb|CBI35387.3|unnamed protein product [Vitis vinifera]
TR79507|c0_g1_i3	6.84	5.11	2.94	3.75	4.86	6.23	5.74	lysine-specific demethylase 5d	gi|297742526|emb|CBI34675.3|unnamed protein product [Vitis vinifera]
TR65933|c1_g1_i5	4.42	9.32	0	1.05	3.62	1.96	2.39	peptidase m1 family protein	gi|297742500|emb|CBI34649.3|unnamed protein product [Vitis vinifera]
TR59600|c0_g1_i1	5.67	5.71	6.86	6.32	6.65	4.59	5.44	spc97 spc98 family of spindle pole body component	gi|297742396|emb|CBI34545.3|unnamed protein product [Vitis vinifera]
Mj_1_GCCAAT_L005_R1_001_(paired)_trimmed_(paired)_contig_14602	1.52	1.19	3.58	3.51	2.69	2.15	7.77	hydroquinone glucosyltransferase	gi|297742314|emb|CBI34463.3|unnamed protein product [Vitis vinifera]
TR75835|c1_g3_i5	10.16	2.9	1.25	0.24	0.45	0.34	0.45	pre-mrna-splicing factor clf1	gi|297742306|emb|CBI34455.3|unnamed protein product [Vitis vinifera]
TR74712|c0_g1_i6	2.39	1.8	1.29	3.8	5.67	4.43	1.57	protein spa1-related 2-like	gi|297742304|emb|CBI34453.3|unnamed protein product [Vitis vinifera]
Mj_1_GCCAAT_L005_R1_001_(paired)_trimmed_(paired)_contig_36848	0.37	1.78	20.83	2.07	1.11	8.46	0.55	cation proton exchanger	gi|297742277|emb|CBI34426.3|unnamed protein product [Vitis vinifera]
TR67711|c0_g1_i2	13.13	25.11	2.71	1.12	1.35	0.11	6.92	phosphoglycerate mutase det1-like	gi|297742223|emb|CBI34372.3|unnamed protein product [Vitis vinifera]
TR61268|c1_g1_i10	4.76	2.96	4.5	2.69	4.95	5.46	5.01	protein	gi|297742216|emb|CBI34365.3|unnamed protein product [Vitis vinifera]
TR60061|c0_g1_i3	6.26	7.16	0.57	0.76	1.08	0.27	1.9	protein	gi|297742118|emb|CBI33905.3|unnamed protein product [Vitis vinifera]
TR41557|c0_g1_i1	2.41	2.83	6.11	2.64	7.46	5.95	6.2	serine threonine protein	gi|297741916|emb|CBI33351.3|unnamed protein product [Vitis vinifera]
TR79625|c3_g2_i7	5.07	3.08	4.71	1.95	2.99	3.58	3.64	serine incorporator 3-like	gi|297741897|emb|CBI33332.3|unnamed protein product [Vitis vinifera]
TR71623|c1_g2_i1	124.09	234.63	204.14	87.39	23.93	37.66	37.57	beta chain	gi|297741676|emb|CBI32808.3|unnamed protein product [Vitis vinifera]
Mj_1_GCCAAT_L005_R1_001_(paired)_trimmed_(paired)_contig_15261	0.96	3.64	4.27	1.22	0.86	10.75	1.13	udp-glycosyltransferase-like protein	gi|297741634|emb|CBI32766.3|unnamed protein product [Vitis vinifera]
TR67874|c0_g1_i1	24.33	28.75	2.71	2.83	5.33	1.98	13.6	unnamed protein product	gi|297741487|emb|CBI32619.3|unnamed protein product [Vitis vinifera]
Mj_1_GCCAAT_L005_R1_001_(paired)_trimmed_(paired)_contig_15201	32.58	56.94	11.27	5.53	9.68	3.46	12.64	tvp38 tmem64 family membrane protein slr0305	gi|297740945|emb|CBI31257.3|unnamed protein product [Vitis vinifera]
TR59034|c0_g1_i4	0.23	0.77	0.14	11.35	3.11	0.38	0.68	atpase subunit 8	gi|297740930|emb|CBI31112.3|unnamed protein product [Vitis vinifera]
TR64885|c0_g1_i3	13.29	5.92	11.82	5.16	8.39	3.94	5.39	probable beta- -galactosyltransferase 20-like	gi|297740771|emb|CBI30953.3|unnamed protein product [Vitis vinifera]
TR63204|c1_g1_i1	21.01	17.36	39.69	32.81	42.08	30.7	29.78	nonclathrin coat protein zeta2-cop	gi|297740639|emb|CBI30821.3|unnamed protein product [Vitis vinifera]
TR53287|c0_g1_i2	0	0.63	0.51	0	0.65	0	16.53	atp binding	gi|297740564|emb|CBI30746.3|unnamed protein product [Vitis vinifera]
TR53287|c0_g1_i6	5.46	4.26	4.52	0	1.81	0.22	8.16	protein	gi|297740564|emb|CBI30746.3|unnamed protein product [Vitis vinifera]
TR79810|c4_g2_i8	4.29	3.35	10.82	3.09	3.99	0.11	20.04	atp binding	gi|297740564|emb|CBI30746.3|unnamed protein product [Vitis vinifera]
scaffold12193	42.88	36.11	5.61	5.5	6.69	5.61	7.97	50s ribosomal protein l34	gi|297740487|emb|CBI30669.3|unnamed protein product [Vitis vinifera]
TR53224|c0_g1_i1	19.33	23.12	72.78	34.13	53.15	41.69	35.1	protein	gi|297740396|emb|CBI30578.3|unnamed protein product [Vitis vinifera]
Mj_1_GCCAAT_L005_R1_001_(paired)_trimmed_(paired)_contig_8801	2.36	8.67	4.36	0.71	1.18	0	4.65	tropinone reductase i	gi|297740326|emb|CBI30508.3|unnamed protein product [Vitis vinifera]
TR56408|c0_g1_i2	4.76	8.82	4.02	0.43	0.94	0.2	8.43	tropinone reductase homolog isoform 1	gi|297740326|emb|CBI30508.3|unnamed protein product [Vitis vinifera]
TR72022|c1_g1_i2	11.19	6.6	11.87	14.92	15.37	15.63	12.76	mip18 family protein at1g68310-like	gi|297740269|emb|CBI30451.3|unnamed protein product [Vitis vinifera]
C933024	2.61	2.32	2.86	1.18	1.67	1.24	8.82	solute carrier family 35 member f1-like	gi|297740093|emb|CBI30275.3|unnamed protein product [Vitis vinifera]
C967198	1.33	2.09	2.9	1.06	3.51	0.15	5.07	solute carrier family 35 member f1-like	gi|297740093|emb|CBI30275.3|unnamed protein product [Vitis vinifera]
TR79650|c1_g4_i6	1.8	3.09	5.07	1.24	1.36	1.2	3.74	btb poz domain-containing protein fbl11-like	gi|297740092|emb|CBI30274.3|unnamed protein product [Vitis vinifera]
TR76615|c0_g5_i1	1.96	2.12	2.6	5.04	4.38	4.33	2.89	calcineurin-like phosphoesterase	gi|297740080|emb|CBI30262.3|unnamed protein product [Vitis vinifera]
Mj_1_GCCAAT_L005_R1_001_(paired)_trimmed_(paired)_contig_14549	27.98	13.44	29.54	36.45	37.36	37.58	19.25	pentatricopeptide repeat-containing protein	gi|297739953|emb|CBI30135.3|unnamed protein product [Vitis vinifera]
TR66524|c1_g1_i4	3.89	7.91	4.14	3.1	4.95	3.17	8.73	protein	gi|297739773|emb|CBI29955.3|unnamed protein product [Vitis vinifera]
TR61566|c1_g1_i1	3.48	2.4	2.07	3.64	5.3	3.4	2.59	pinus taeda anonymous locus umn_777_01 genomic sequence	gi|297739762|emb|CBI29944.3|unnamed protein product [Vitis vinifera]
TR61566|c2_g1_i3	3.61	3.04	2.93	2.83	4.35	5.33	4.62	pinus taeda anonymous locus umn_777_01 genomic sequence	gi|297739762|emb|CBI29944.3|unnamed protein product [Vitis vinifera]
scaffold11478	0.42	0	2.31	2.67	6.07	10.42	4.28	transparent testa 1	gi|297739699|emb|CBI29881.3|unnamed protein product [Vitis vinifera]
TR58348|c0_g1_i1	6.28	7.21	3.65	1.84	2.6	2.01	3.21	atp phosphoribosyl transferase	gi|297739543|emb|CBI29725.3|unnamed protein product [Vitis vinifera]
TR58348|c0_g1_i5	4.13	5.97	3	1.62	2.04	2.59	3.63	atp phosphoribosyl transferase	gi|297739543|emb|CBI29725.3|unnamed protein product [Vitis vinifera]
Mj_1_GCCAAT_L005_R1_001_(paired)_trimmed_(paired)_contig_23497	6.89	4.3	6.3	9.75	5.01	10.94	4.88	protein strubbelig-receptor family 3-like	gi|297739262|emb|CBI28913.3|unnamed protein product [Vitis vinifera]
TR57712|c0_g2_i6	3.55	5.12	0.51	0	0.16	0	0.42	plant-specific domain tigr01589 family protein	gi|297739070|emb|CBI28559.3|unnamed protein product [Vitis vinifera]
TR64575|c0_g3_i2	2.59	2.23	1.84	4.63	0.38	16.79	1.95	protein	gi|297739065|emb|CBI28554.3|unnamed protein product [Vitis vinifera]
Mj_1_GCCAAT_L005_R1_001_(paired)_trimmed_(paired)_contig_6137	9.59	4.61	5.16	5.6	6.31	7.36	8.11	nuclear pore complex protein nup205-like	gi|297738947|emb|CBI28192.3|unnamed protein product [Vitis vinifera]
TR75377|c0_g1_i3	9.36	3.78	5.86	5.61	7.19	6.52	7.41	nuclear pore complex protein nup205-like	gi|297738947|emb|CBI28192.3|unnamed protein product [Vitis vinifera]
TR61237|c0_g1_i2	4.14	1.9	3.78	2.62	2.9	2.07	6.14	glycine-rich rna-binding	gi|297738892|emb|CBI28137.3|unnamed protein product [Vitis vinifera]
Mj_1_GCCAAT_L005_R1_001_(paired)_trimmed_(paired)_contig_264	17.41	10.59	5.45	5.6	8.48	4.75	11.8	bile acid na+ symporter family protein	gi|297738888|emb|CBI28133.3|unnamed protein product [Vitis vinifera]
TR63719|c0_g1_i2	14.93	10.21	5.65	6.37	7.01	4.24	13.3	bile acid na+ symporter family protein	gi|297738888|emb|CBI28133.3|unnamed protein product [Vitis vinifera]
TR63915|c1_g1_i4	13.45	10.35	5.17	4.33	5.65	3.58	11.43	bile acid na+ symporter family protein	gi|297738888|emb|CBI28133.3|unnamed protein product [Vitis vinifera]
TR63915|c1_g1_i8	15.57	13.93	5.71	3.11	8.04	3.22	10.25	bile acid na+ symporter family protein	gi|297738888|emb|CBI28133.3|unnamed protein product [Vitis vinifera]
TR50638|c0_g1_i2	7.5	4.12	6.39	8.61	7.39	9.74	6.76	transcriptional corepressor leunig-like	gi|297738887|emb|CBI28132.3|unnamed protein product [Vitis vinifera]
TR49292|c0_g1_i1	11.27	4.68	7.38	2.53	4.41	1.68	8.31	unnamed protein product	gi|297738696|emb|CBI27941.3|unnamed protein product [Vitis vinifera]
Mj_1_GCCAAT_L005_R1_001_(paired)_trimmed_(paired)_contig_33806	1.15	0.94	4.65	4.7	5.42	2.19	3.57	protein kinase family protein	gi|297738688|emb|CBI27933.3|unnamed protein product [Vitis vinifera]
TR76213|c1_g1_i4	3.14	2.85	5.91	9.22	19.95	7.84	9.6	kinase family protein	gi|297738688|emb|CBI27933.3|unnamed protein product [Vitis vinifera]
TR73217|c0_g1_i1	4.46	3.38	3.82	2.77	3.63	3.12	5.15	potassium efflux antiporter	gi|297738684|emb|CBI27929.3|unnamed protein product [Vitis vinifera]
Mj_1_GCCAAT_L005_R1_001_(paired)_trimmed_(paired)_contig_3277	4	3.31	4.19	2.9	6.39	4.94	9.53	kinase family protein	gi|297738630|emb|CBI27875.3|unnamed protein product [Vitis vinifera]
TR73311|c2_g1_i2	2.54	2.63	2.62	4.72	6.51	11.32	5.55	denn (aex-3) domain-containing protein	gi|297738574|emb|CBI27819.3|unnamed protein product [Vitis vinifera]
TR73311|c2_g1_i7	2.41	3.36	3.97	9.46	6.63	15.75	7.77	denn (aex-3) domain-containing protein	gi|297738574|emb|CBI27819.3|unnamed protein product [Vitis vinifera]
TR64626|c1_g1_i1	7.36	5.64	3.85	1.41	2.56	1.6	5.12	translin-associated protein x-like isoform 1	gi|297738200|emb|CBI27401.3|unnamed protein product [Vitis vinifera]
TR72113|c0_g1_i5	5.08	3.69	5.83	4.31	4.18	5.62	4.61	protein nap1	gi|297737983|emb|CBI27184.3|unnamed protein product [Vitis vinifera]
Mj_1_GCCAAT_L005_R1_001_(paired)_trimmed_(paired)_contig_4469	264.02	138.61	358.74	205.65	359.9	281.87	236.51	60s ribosomal protein l44	gi|297737946|emb|CBI27147.3|unnamed protein product [Vitis vinifera]
TR55084|c0_g1_i3	6.58	5.98	7.39	10.94	6.87	9.54	4.23	atp-dependent clp protease proteolytic subunit	gi|297737943|emb|CBI27144.3|unnamed protein product [Vitis vinifera]
Mj_1_GCCAAT_L005_R1_001_(paired)_trimmed_(paired)_contig_15849	7.07	5.56	7.1	7.97	8.02	8.27	7.69	phytochrome and flowering time regulatory protein 1	gi|297737854|emb|CBI27055.3|unnamed protein product [Vitis vinifera]
TR71266|c0_g2_i4	3.69	2.14	2.27	1.78	1.92	5.34	4.11	unnamed protein product	gi|297737020|emb|CBI26221.3|unnamed protein product [Vitis vinifera]
Mj_1_GCCAAT_L005_R1_001_(paired)_trimmed_(paired)_contig_2080	118.97	79.49	372.69	255.43	213.63	175.69	165.11	adp-ribosylation factor	gi|297736783|emb|CBI25984.3|unnamed protein product [Vitis vinifera]
Mj_1_GCCAAT_L005_R1_001_(paired)_trimmed_(paired)_contig_7311	84.73	97.66	208.23	250.23	168.63	179.48	126.82	adp-ribosylation factor	gi|297736783|emb|CBI25984.3|unnamed protein product [Vitis vinifera]
TR51443|c1_g1_i1	56.65	57.54	172.12	102.3	85.38	93.23	67.82	adp-ribosylation factor	gi|297736783|emb|CBI25984.3|unnamed protein product [Vitis vinifera]
TR72230|c5_g3_i1	63.12	67.17	197.54	123.25	98.26	113.8	72.32	adp-ribosylation factor	gi|297736783|emb|CBI25984.3|unnamed protein product [Vitis vinifera]
TR72230|c5_g3_i2	40.55	45.96	123.12	98.71	137.37	159	94.02	adp-ribosylation factor	gi|297736783|emb|CBI25984.3|unnamed protein product [Vitis vinifera]
TR72230|c5_g3_i3	42.11	40.76	134.22	81.12	67.32	76.07	48.63	adp-ribosylation factor	gi|297736783|emb|CBI25984.3|unnamed protein product [Vitis vinifera]
TR56138|c0_g1_i1	19.52	27.18	7.62	0.32	1.21	1.8	5.19	bolting time control 1	gi|297736458|emb|CBI25329.3|unnamed protein product [Vitis vinifera]
TR72658|c0_g2_i1	4.57	3.06	4.56	8.84	9.57	16.44	5.77	u4 u6 small nuclear ribonucleoprotein prp3-like	gi|297736440|emb|CBI25311.3|unnamed protein product [Vitis vinifera]
TR73645|c0_g2_i1	4.1	3.26	3.57	7.6	6.87	14.34	4.25	u4 u6 small nuclear ribonucleoprotein prp3-like	gi|297736440|emb|CBI25311.3|unnamed protein product [Vitis vinifera]
TR73645|c0_g2_i2	3.64	3.9	4.22	7.6	6.62	10.7	4.56	u4 u6 small nuclear ribonucleoprotein prp3-like	gi|297736440|emb|CBI25311.3|unnamed protein product [Vitis vinifera]
TR73645|c0_g2_i4	3.54	1.8	3.55	6.67	7.14	11.52	3.97	u4 u6 small nuclear ribonucleoprotein prp3-like	gi|297736440|emb|CBI25311.3|unnamed protein product [Vitis vinifera]
TR71729|c0_g1_i2	0.6	2.43	9.82	1.49	2.04	1.42	0.34	siroheme synthase-like	gi|297736203|emb|CBI24841.3|unnamed protein product [Vitis vinifera]
TR78953|c0_g2_i2	1.76	1.51	3.31	5.3	5.25	5.26	1.39	protein	gi|297735822|emb|CBI18542.3|unnamed protein product [Vitis vinifera]
TR78626|c1_g2_i10	4.2	2.61	5.94	3.33	6.58	2.09	3.1	breast cancer type 2 susceptibility protein	gi|297735615|emb|CBI18109.3|unnamed protein product [Vitis vinifera]
TR78970|c0_g4_i2	3.55	5.59	0.9	0	1.13	0.28	2.74	protein	gi|297735528|emb|CBI18022.3|unnamed protein product [Vitis vinifera]
TR72566|c2_g1_i3	4.34	2.75	3.46	3.3	6.01	4.79	4.19	cd2 antigen cytoplasmic tail-binding protein 2	gi|297735379|emb|CBI17819.3|unnamed protein product [Vitis vinifera]
TR51411|c3_g1_i1	262.57	167.26	439.97	323.15	460.23	326.06	248.73	60s ribosomal protein l38	gi|297735234|emb|CBI17596.3|unnamed protein product [Vitis vinifera]
TR63767|c2_g1_i1	15.57	9.98	12.22	12	13.05	16.29	18.26	splicing factor u2af large subunit b	gi|297735185|emb|CBI17547.3|unnamed protein product [Vitis vinifera]
TR63767|c2_g1_i2	11.88	8.93	8.18	9.7	11.41	14.84	13.17	splicing factor u2af large subunit b	gi|297735185|emb|CBI17547.3|unnamed protein product [Vitis vinifera]
TR79610|c1_g1_i5	2.55	3.43	2.41	2.83	4.56	5.64	4.27	vam6 vps39-like protein	gi|297735158|emb|CBI17520.3|unnamed protein product [Vitis vinifera]
Mj_1_GCCAAT_L005_R1_001_(paired)_trimmed_(paired)_contig_11744	6.46	7.07	6.27	8.87	6.79	7.02	13.96	upf0183 protein at3g51130-like	gi|297735048|emb|CBI17410.3|unnamed protein product [Vitis vinifera]
TR60722|c0_g1_i1	317.89	208.81	339.49	334.53	344.67	277.95	262.24	60s acidic ribosomal protein	gi|297734823|emb|CBI17057.3|unnamed protein product [Vitis vinifera]
TR66319|c0_g1_i6	3.72	1.29	1.99	2.8	5.28	1.96	2.27	protein aatf	gi|297734589|emb|CBI16640.3|unnamed protein product [Vitis vinifera]
TR63415|c1_g1_i3	5.72	4.28	4.72	3.12	4.05	3.37	4.44	serine threonine-protein kinase rio1	gi|297734420|emb|CBI15667.3|unnamed protein product [Vitis vinifera]
C961240	5.98	4.69	10.87	7.42	11.08	7.35	8.51	protein	gi|297734258|emb|CBI15505.3|unnamed protein product [Vitis vinifera]
TR79440|c2_g1_i1	6.65	6.99	9.32	6.69	7.04	6.31	13.8	plant synaptotagmin	gi|297734213|emb|CBI15460.3|unnamed protein product [Vitis vinifera]
TR79136|c2_g2_i7	5.03	2.1	1.01	3.32	2.3	1.92	2.79	retrotransposon ty1-copia subclass	gi|297726629|ref|NP_001175678.1|Os08g0544300 [Oryza sativa Japonica Group] gi|255678617|dbj|BAH94406.1| Os08g0544300 [Oryza sativa Japonica Group]
TR62659|c0_g1_i1	1.42	0.91	0.56	0.5	0.24	0	5.92	patatin group a-3-like	gi|297608743|ref|NP_001062044.2|Os08g0477500 [Oryza sativa Japonica Group] gi|255678529|dbj|BAF23958.2| Os08g0477500 [Oryza sativa Japonica Group]
Mj_1_GCCAAT_L005_R1_001_(paired)_trimmed_(paired)_contig_12660	4.86	2.26	5.28	0.79	1.68	1.94	3.81	#NAME?	gi|297606819|ref|NP_001059031.2|Os07g0178900 [Oryza sativa Japonica Group] gi|255677559|dbj|BAF20945.2| Os07g0178900 [Oryza sativa Japonica Group]
TR59454|c8_g1_i1	0	0	0	12.67	7.96	0.18	0.16	conserved protein	gi|297183232|gb|ADI19371.1|hypothetical protein [uncultured Spirochaetales bacterium HF0500_06B09]
TR73503|c2_g2_i1	0	0	0	8.68	11.21	0.17	0.31	conserved protein	gi|297181029|gb|ADI17229.1|hypothetical protein [uncultured alpha proteobacterium HF0070_14E07]
TR73503|c2_g2_i3	0.15	0	0	6.01	7.24	0	0	conserved protein	gi|297181029|gb|ADI17229.1|hypothetical protein [uncultured alpha proteobacterium HF0070_14E07]
TR73503|c2_g3_i5	0	0.38	0.7	4.71	5.32	0.44	1.95	retrotransposon protein	gi|297181029|gb|ADI17229.1|hypothetical protein [uncultured alpha proteobacterium HF0070_14E07]
TR73503|c2_g3_i6	0	0	0.42	3.7	9.91	0.8	0.35	cell wall-associated partial	gi|297181029|gb|ADI17229.1|hypothetical protein [uncultured alpha proteobacterium HF0070_14E07]
TR73862|c1_g6_i1	12.84	4.68	12.1	10.96	4.58	6.52	6.82	haus augmin-like complex subunit	gi|296090667|emb|CBI41067.3|unnamed protein product [Vitis vinifera]
TR67272|c0_g1_i1	5.19	3.99	5.94	3.43	4.31	3.68	6.26	probable purine permease 5-like	gi|296090570|emb|CBI40933.3|unnamed protein product [Vitis vinifera]
Mj_1_GCCAAT_L005_R1_001_(paired)_trimmed_(paired)_contig_7074	7.21	5.87	11.91	10.83	12.94	6.83	14.31	pyruvate kinase	gi|296090381|emb|CBI40200.3|unnamed protein product [Vitis vinifera]
TR64161|c3_g1_i6	8.55	6.97	9.92	8.66	7.61	5.65	12.84	uracil phosphoribosyltransferase	gi|296090229|emb|CBI40048.3|unnamed protein product [Vitis vinifera]
TR57497|c0_g1_i1	7.2	7.35	8.3	7.78	6.39	5.72	5.11	protein	gi|296089619|emb|CBI39438.3|unnamed protein product [Vitis vinifera]
TR57497|c0_g1_i4	5.99	7.82	6.59	6.63	6.85	5.91	5.73	protein	gi|296089619|emb|CBI39438.3|unnamed protein product [Vitis vinifera]
TR65025|c0_g1_i1	5.69	3.83	6	2.55	3.83	2.65	4.16	n2227-like domain-containing protein	gi|296089545|emb|CBI39364.3|unnamed protein product [Vitis vinifera]
TR65025|c0_g1_i2	5.51	3.61	6.49	3.66	3.28	2.76	5.9	n2227-like domain-containing protein	gi|296089545|emb|CBI39364.3|unnamed protein product [Vitis vinifera]
TR72991|c2_g2_i2	10.94	1.21	3.32	1.77	1.26	1.2	2.45	subtilase family protein	gi|296089234|emb|CBI39006.3|unnamed protein product [Vitis vinifera]
TR46974|c0_g1_i2	1.78	7.07	0.3	0	0.38	0	3.5	caffeic acid o-methyltransferase	gi|296089018|emb|CBI38721.3|unnamed protein product [Vitis vinifera]
TR60144|c0_g1_i1	3.35	5.17	15.34	10.66	13.71	7.89	6.11	methyltransferase pmt20	gi|296088461|emb|CBI37452.3|unnamed protein product [Vitis vinifera]
TR72784|c0_g1_i3	4.74	5.58	5.8	8.67	6.26	6.27	6.65	aspartokinase chloroplastic-like	gi|296088176|emb|CBI35668.3|unnamed protein product [Vitis vinifera]
TR77318|c0_g1_i4	4.8	3.55	6.35	4.77	4.6	4.23	3.09	dna polymerase v	gi|296088084|emb|CBI35443.3|unnamed protein product [Vitis vinifera]
TR78259|c3_g2_i11	0.31	3.42	1.46	2.96	6.51	6.73	3.37	nodulin 21 -like transporter family protein	gi|296087698|emb|CBI34954.3|unnamed protein product [Vitis vinifera]
TR78259|c3_g2_i7	1.26	3.74	2.23	3.22	4.54	20.1	3.87	nodulin 21 -like transporter family protein	gi|296087698|emb|CBI34954.3|unnamed protein product [Vitis vinifera]
TR78259|c3_g2_i9	1.38	4.61	2.44	2.85	8.88	15.64	3.4	nodulin 21 -like transporter family protein	gi|296087698|emb|CBI34954.3|unnamed protein product [Vitis vinifera]
TR78413|c0_g7_i5	1.35	6.87	3.4	3.83	13.56	9.11	5.7	nodulin 21 -like transporter family protein	gi|296087698|emb|CBI34954.3|unnamed protein product [Vitis vinifera]
Mj_1_GCCAAT_L005_R1_001_(paired)_trimmed_(paired)_contig_36530	0.38	2.16	3.26	10.2	21.48	1.12	1.37	homeobox-leucine zipper protein hat5	gi|296087684|emb|CBI34940.3|unnamed protein product [Vitis vinifera]
TR77421|c0_g5_i3	0.52	1.12	3.7	9.77	20.38	1.16	1.94	homeobox-leucine zipper protein hat5	gi|296087684|emb|CBI34940.3|unnamed protein product [Vitis vinifera]
TR79730|c1_g1_i1	9.84	8.23	5.68	34.98	26.38	16.42	34.04	riboflavin biosynthesis protein chloroplastic-like	gi|296087438|emb|CBI34027.3|unnamed protein product [Vitis vinifera]
TR66806|c0_g1_i2	2.58	1.03	0.78	7.56	5.68	18.69	6.82	protein phosphatase	gi|296087354|emb|CBI33728.3|unnamed protein product [Vitis vinifera]
TR67484|c1_g1_i2	4.35	4.32	8.81	7.65	9.9	7.71	3.04	protein	gi|296087256|emb|CBI33630.3|unnamed protein product [Vitis vinifera]
C960984	2.31	3.8	4.6	4.09	5.99	3.16	4.03	pyridoxal kinase	gi|296087176|emb|CBI33550.3|unnamed protein product [Vitis vinifera]
Mj_1_GCCAAT_L005_R1_001_(paired)_trimmed_(paired)_contig_20739	6	2.69	3.25	2.75	3.73	1.46	4.77	ubiquitin carboxyl-terminal hydrolase 15-like	gi|296086860|emb|CBI33027.3|unnamed protein product [Vitis vinifera]
TR76839|c0_g1_i2	2.18	2.17	2.59	5.99	6.39	9.57	3.36	structural constituent of ribosome	gi|296086711|emb|CBI32346.3|unnamed protein product [Vitis vinifera]
TR76933|c1_g1_i11	1.85	0.93	1.66	4.34	4.15	5.6	2.26	structural constituent of ribosome	gi|296086711|emb|CBI32346.3|unnamed protein product [Vitis vinifera]
scaffold11103	0.97	1.09	1.66	4.07	3.17	5.3	1.65	structural constituent of ribosome	gi|296086711|emb|CBI32346.3|unnamed protein product [Vitis vinifera]
TR58983|c0_g1_i1	9.46	9.33	20.64	27.85	30.42	34.05	19.33	btb poz and math domain-containing protein 2-like	gi|296086694|emb|CBI32329.3|unnamed protein product [Vitis vinifera]
TR70456|c1_g2_i10	3.65	1.36	2.43	0	0.24	0	5	integral membrane family protein	gi|296086627|emb|CBI32262.3|unnamed protein product [Vitis vinifera]
scaffold12034	16.42	11.67	17.27	21.47	22.41	24.36	20.27	u4 u6 small nuclear ribonucleoprotein prp31-like	gi|296086542|emb|CBI32131.3|unnamed protein product [Vitis vinifera]
TR78805|c0_g1_i1	8.5	5.71	4.61	9.21	4.98	11.78	7.77	embryo defective 2016 protein	gi|296086497|emb|CBI32086.3|unnamed protein product [Vitis vinifera]
Mj_1_GCCAAT_L005_R1_001_(paired)_trimmed_(paired)_contig_7874	4.87	8.14	14.81	12.57	8.68	7.16	5.44	ubiquitin carrier protein	gi|296086416|emb|CBI32005.3|unnamed protein product [Vitis vinifera]
TR72118|c1_g2_i2	22.79	28.24	68.36	47.34	49.25	40.59	24.94	ubiquitin-conjugating enzyme	gi|296086416|emb|CBI32005.3|unnamed protein product [Vitis vinifera]
TR72118|c1_g2_i3	28.8	30.84	57.27	62.93	53.32	52.6	32.15	ubiquitin-conjugating enzyme	gi|296086416|emb|CBI32005.3|unnamed protein product [Vitis vinifera]
TR72118|c1_g2_i4	86.51	63.07	120.15	192.79	148.39	170.99	86.23	ubiquitin-conjugating enzyme	gi|296086416|emb|CBI32005.3|unnamed protein product [Vitis vinifera]
scaffold14110	19.99	24.64	53.06	39.89	37.93	34.93	20.05	ubiquitin-conjugating enzyme	gi|296086416|emb|CBI32005.3|unnamed protein product [Vitis vinifera]
Mj_1_GCCAAT_L005_R1_001_(paired)_trimmed_(paired)_contig_58173	0.13	0	0.46	3.14	1.97	0.88	11.43	glutathione s-transferase	gi|296086371|emb|CBI31960.3|unnamed protein product [Vitis vinifera]
Mj_1_GCCAAT_L005_R1_001_(paired)_trimmed_(paired)_contig_66046	0	0	0	8.85	17.38	0	13.97	glutathione s-	gi|296086371|emb|CBI31960.3|unnamed protein product [Vitis vinifera]
TR76646|c0_g1_i2	11.29	9.36	10.99	20.62	26.85	36.03	20.73	protein mei2-like 2-like	gi|296086311|emb|CBI31752.3|unnamed protein product [Vitis vinifera]
TR73040|c1_g1_i2	2.38	2.32	5.61	5.65	5.33	4.61	5.86	mitochondrial substrate carrier family protein q-like	gi|296086092|emb|CBI31533.3|unnamed protein product [Vitis vinifera]
TR69877|c0_g3_i3	2.81	1.59	0.61	3.31	2.81	8.57	1.23	amino acid permease	gi|296085988|emb|CBI31429.3|unnamed protein product [Vitis vinifera]
TR69877|c0_g3_i4	2.44	1.07	0.77	2.09	2.39	8.77	1.39	amino acid transporter	gi|296085988|emb|CBI31429.3|unnamed protein product [Vitis vinifera]
TR54419|c0_g3_i3	7.06	15.65	7.82	3.17	1.87	4.07	4.92	peptide transporter-like protein	gi|296085541|emb|CBI29273.3|unnamed protein product [Vitis vinifera]
TR61540|c1_g1_i2	9.97	7.38	11.06	14.99	11.74	15.64	9.61	rnase l inhibitor-like protein	gi|296085461|emb|CBI29193.3|unnamed protein product [Vitis vinifera]
TR61540|c1_g1_i3	8.16	7.17	10.72	12.97	10.48	16.8	9.65	rnase l inhibitor-like protein	gi|296085461|emb|CBI29193.3|unnamed protein product [Vitis vinifera]
TR61540|c2_g1_i1	10.08	8.34	12.23	14.01	11.45	15.96	9.08	rnase l inhibitor-like protein	gi|296085461|emb|CBI29193.3|unnamed protein product [Vitis vinifera]
TR61540|c2_g1_i2	8.67	7.47	10.12	12.47	11.38	16.2	8.72	rnase l inhibitor-like protein	gi|296085461|emb|CBI29193.3|unnamed protein product [Vitis vinifera]
scaffold11600	9.2	7.06	11.08	12.2	10.58	15.16	9.56	rnase l inhibitor-like protein	gi|296085461|emb|CBI29193.3|unnamed protein product [Vitis vinifera]
TR67545|c0_g1_i1	5.54	0.67	2.34	3	3.58	4.6	2.74	dna gyrase subunit a	gi|296085401|emb|CBI29133.3|unnamed protein product [Vitis vinifera]
TR67545|c0_g1_i4	5.2	1.24	2.36	3.08	3.44	4.01	2.5	dna gyrase subunit a	gi|296085401|emb|CBI29133.3|unnamed protein product [Vitis vinifera]
TR66062|c0_g1_i3	10.94	18.56	6.86	2.74	4.55	1.77	5.63	glucose-6-phosphate dehydrogenase	gi|296085025|emb|CBI28440.3|unnamed protein product [Vitis vinifera]
Mj_1_GCCAAT_L005_R1_001_(paired)_trimmed_(paired)_contig_4832	6.11	6.35	2.3	1.31	3.63	2.52	3.35	threonyl-trna synthetase	gi|296084987|emb|CBI28402.3|unnamed protein product [Vitis vinifera]
TR76427|c3_g2_i4	14.84	21.38	4.55	4.58	5.64	5.26	5.64	transcription factor e2f	gi|296084860|emb|CBI28269.3|unnamed protein product [Vitis vinifera]
TR79192|c0_g3_i1	2.73	1.68	1.61	2.78	5.24	5.84	2.69	tetratricopeptide repeat-containing protein	gi|296084812|emb|CBI27694.3|unnamed protein product [Vitis vinifera]
Mj_1_GCCAAT_L005_R1_001_(paired)_trimmed_(paired)_contig_5919	7.38	9.39	22.21	12.11	8.39	8.74	7.98	at5g21070 t10f18_100	gi|296083971|emb|CBI24359.3|unnamed protein product [Vitis vinifera]
TR62133|c0_g1_i1	14.66	16.34	52.32	23.78	20.64	21.73	15.93	at5g21070 t10f18_100	gi|296083971|emb|CBI24359.3|unnamed protein product [Vitis vinifera]
TR72000|c0_g1_i5	3	3.14	3.03	3.41	5.99	7.15	4.66	superkiller viralicidic activity 2-like 2	gi|296083960|emb|CBI24348.3|unnamed protein product [Vitis vinifera]
TR68252|c0_g1_i2	2.8	1.78	2.72	4.64	7.52	8.1	4.68	protein kinase chloroplastic-like	gi|296083955|emb|CBI24343.3|unnamed protein product [Vitis vinifera]
TR68252|c1_g1_i3	2.48	0.94	1.85	3.94	5.82	5.52	5.38	protein kinase 2b	gi|296083955|emb|CBI24343.3|unnamed protein product [Vitis vinifera]
Mj_1_GCCAAT_L005_R1_001_(paired)_trimmed_(paired)_contig_3977	8.68	5.55	6.57	4.33	4.84	6.84	6.84	replication factor c subunit 1-like	gi|296083902|emb|CBI24290.3|unnamed protein product [Vitis vinifera]
TR77474|c0_g1_i1	11.45	7.4	8.19	6.81	6.18	8.06	9.41	replication factor c subunit 1-like	gi|296083902|emb|CBI24290.3|unnamed protein product [Vitis vinifera]
TR77686|c0_g1_i2	6.69	4.28	5.16	3.72	3.88	4.97	6.13	replication factor c subunit 1-like	gi|296083902|emb|CBI24290.3|unnamed protein product [Vitis vinifera]
TR46842|c0_g1_i1	111.17	79.35	146.95	128.1	183.31	142.67	163.89	histone h3	gi|296083584|emb|CBI23573.3|unnamed protein product [Vitis vinifera]
TR52523|c1_g1_i1	90.58	62.91	110.05	91.72	131.47	115.01	127.43	histone h3	gi|296083584|emb|CBI23573.3|unnamed protein product [Vitis vinifera]
TR79671|c1_g3_i2	15.75	2.44	7.97	2.01	1.87	3.11	4.46	pentatricopeptide repeat-containing protein	gi|296083564|emb|CBI23556.3|unnamed protein product [Vitis vinifera]
TR58948|c0_g1_i1	25.63	27.36	17.38	8.64	6.46	4.56	4.35	myb-like transcription factor 2	gi|296083498|emb|CBI23467.3|unnamed protein product [Vitis vinifera]
TR68099|c0_g1_i2	6.88	7.65	14.19	5.41	8.24	8.7	9.47	protein	gi|296083414|emb|CBI23367.3|unnamed protein product [Vitis vinifera]
scaffold12901	2.68	1.82	4.5	4.57	2.87	5.12	3.47	gtp-binding protein sar1a	gi|296083269|emb|CBI22905.3|unnamed protein product [Vitis vinifera]
Mj_1_GCCAAT_L005_R1_001_(paired)_trimmed_(paired)_contig_15388	2.01	2.05	5.24	4.46	5.61	4.32	4.75	membrane-anchored ubiquitin-fold protein 2	gi|296082984|emb|CBI22285.3|unnamed protein product [Vitis vinifera]
TR77866|c0_g4_i9	1.81	1.72	5.98	0.41	1.16	2.3	1.44	molybdenum cofactor sulfurase	gi|296082731|emb|CBI21736.3|unnamed protein product [Vitis vinifera]
TR61045|c0_g1_i1	5.46	4.18	8.61	5.9	7.32	8.37	9.44	protein	gi|296082348|emb|CBI21353.3|unnamed protein product [Vitis vinifera]
TR73191|c0_g1_i1	4.66	3.87	6.08	3.28	2.82	0.97	5.92	unnamed protein product	gi|296082310|emb|CBI21315.3|unnamed protein product [Vitis vinifera]
TR75500|c0_g2_i1	3.43	5.25	0.81	0.54	0.26	0.95	1.52	pentatricopeptide repeat-containing protein	gi|296081889|emb|CBI20894.3|unnamed protein product [Vitis vinifera]
TR64783|c0_g1_i2	3.31	5.78	3.26	1.42	2.38	0.11	7.91	g-type lectin s-receptor-like serine threonine-protein kinase at1g34300-like	gi|296081766|emb|CBI20771.3|unnamed protein product [Vitis vinifera]
TR70096|c4_g1_i6	2.45	2.97	2.62	2.3	1.67	5.82	2.09	protein kinase	gi|296081672|emb|CBI20677.3|unnamed protein product [Vitis vinifera]
Mj_1_GCCAAT_L005_R1_001_(paired)_trimmed_(paired)_contig_13186	2.77	3.33	5.81	6.69	9.91	9.64	6.89	helicase and zinc finger domain-containing protein	gi|296080908|emb|CBI18752.3|unnamed protein product [Vitis vinifera]
TR56255|c0_g3_i1	0	0	4.32	5.79	15.5	19.91	0.55	probable mannitol dehydrogenase-like	gi|296080873|emb|CBI18802.3|unnamed protein product [Vitis vinifera]
TR62723|c0_g2_i1	37.38	30.93	54.48	44.24	57.67	46.64	48.04	transcriptional coactivator-like protein	gi|295913448|gb|ADG57975.1|transcription factor [Lycoris longituba] gi|295913679|gb|ADG58081.1| transcription factor [Lycoris longituba] gi|295913683|gb|ADG58083.1| transcription factor [Lycoris longituba]
TR62723|c1_g2_i2	58.01	48.57	87.55	65.84	77.87	68.91	80.61	transcriptional coactivator-like protein	gi|295913448|gb|ADG57975.1|transcription factor [Lycoris longituba] gi|295913679|gb|ADG58081.1| transcription factor [Lycoris longituba] gi|295913683|gb|ADG58083.1| transcription factor [Lycoris longituba]
TR62723|c1_g2_i4	45.22	38.07	67.5	55.59	63.16	55.18	57.7	transcriptional coactivator-like protein	gi|295913448|gb|ADG57975.1|transcription factor [Lycoris longituba] gi|295913679|gb|ADG58081.1| transcription factor [Lycoris longituba] gi|295913683|gb|ADG58083.1| transcription factor [Lycoris longituba]
Mj_1_GCCAAT_L005_R1_001_(paired)_trimmed_(paired)_contig_68740	0	0	0.23	0.46	0.15	7.48	0	thiamin biosynthetic enzyme	gi|295687239|gb|ADG27845.1|thiazole biosynthetic enzyme [Gossypium hirsutum]
TR65373|c0_g1_i1	138.58	92.28	126.04	34.11	49.02	9.41	389.08	chalcone isomerase	gi|295687229|gb|ADG27840.1|chalcone isomerase [Gossypium hirsutum]
TR65373|c0_g1_i2	169.52	116.15	189.32	46.22	64.73	9.92	478.04	chalcone isomerase	gi|295687229|gb|ADG27840.1|chalcone isomerase [Gossypium hirsutum]
TR65789|c0_g2_i3	69.97	54.87	75.31	18.25	24.97	3.62	142.78	chalcone isomerase	gi|295687229|gb|ADG27840.1|chalcone isomerase [Gossypium hirsutum]
TR78846|c2_g1_i6	0.36	0.22	0.75	6.18	4.8	2.95	0.41	nadh dehydrogenase subunit 7	gi|295311695|ref|YP_003587352.1|NADH dehydrogenase subunit 7 [Cucurbita pepo] gi|259156823|gb|ACV96684.1| NADH dehydrogenase subunit 7 [Cucurbita pepo]
TR58869|c1_g2_i1	0.4	0.38	0	11.81	4.35	0.23	0.33	ribosomal protein s4	gi|295311663|ref|YP_003587235.1|ribosomal protein S4 [Citrullus lanatus] gi|259156791|gb|ACV96653.1| ribosomal protein S4 [Citrullus lanatus]
TR78846|c3_g1_i1	0.26	0.37	0.43	7.35	3	1.56	0.64	nadh dehydrogenase subunit 7	gi|295311652|ref|YP_003587260.1|NADH dehydrogenase subunit 7 [Citrullus lanatus] gi|259156780|gb|ACV96642.1| NADH dehydrogenase subunit 7 [Citrullus lanatus]
TR78846|c3_g1_i8	0.33	0.62	0.19	5.45	2.2	0.45	0.4	nadh dehydrogenase subunit 7	gi|295311652|ref|YP_003587260.1|NADH dehydrogenase subunit 7 [Citrullus lanatus] gi|259156780|gb|ACV96642.1| NADH dehydrogenase subunit 7 [Citrullus lanatus]
TR70872|c1_g1_i7	0.79	0.42	1.52	10.22	20.86	7.97	2.28	nadh dehydrogenase subunit 5	gi|295311650|ref|YP_003587253.1|NADH dehydrogenase subunit 5 [Citrullus lanatus] gi|259156778|gb|ACV96640.1| NADH dehydrogenase subunit 5 [Citrullus lanatus]
Mj_1_GCCAAT_L005_R1_001_(paired)_trimmed_(paired)_contig_25306	0.23	0.8	0.27	12.59	3.93	0.73	1.15	atpase subunit 4	gi|295311634|ref|YP_003587262.1|ATPase subunit 4 [Citrullus lanatus] gi|259156762|gb|ACV96624.1| ATPase subunit 4 [Citrullus lanatus]
TR72913|c0_g2_i1	0.63	0.85	0.56	16.52	5.14	0.88	1.92	atpase subunit 4	gi|295311634|ref|YP_003587262.1|ATPase subunit 4 [Citrullus lanatus] gi|259156762|gb|ACV96624.1| ATPase subunit 4 [Citrullus lanatus]
TR77908|c0_g1_i2	1.68	4.9	0.77	88.11	16.28	1.47	6.92	atpase subunit 1	gi|295311633|ref|YP_003587244.1|ATPase subunit 1 [Citrullus lanatus] gi|259156761|gb|ACV96623.1| ATPase subunit 1 [Citrullus lanatus]
TR77023|c2_g1_i1	125.88	75.08	192.43	127.57	159.95	117.45	117.13	transcription factor	gi|295002526|gb|ADF59041.1|putative NAC transcription factor [Jatropha curcas]
Mj_1_GCCAAT_L005_R1_001_(paired)_trimmed_(paired)_contig_37219	0.14	0	0	0.46	0	5.93	0	photosystem i reaction center subunit xi	gi|29468504|gb|AAO85557.1|photosystem I subunit XI [Nicotiana attenuata]
TR74101|c0_g3_i4	18.2	26.26	15.34	15.29	13.05	12.67	21.45	beta-ketoacyl-acp synthase ii	gi|294666|gb|AAA33872.1|chloroplast beta-ketoacyl-ACP synthase precursor [Ricinus communis] gi|148645269|gb|ABR01158.1| plastid 3-keto-acyl-ACP synthase II [Ricinus communis]
C937384	0.68	0.33	2.62	2.44	4.35	1.9	5.4	protein	gi|294461799|gb|ADE76458.1|unknown [Picea sitchensis]
Mj_1_GCCAAT_L005_R1_001_(paired)_trimmed_(paired)_contig_4534	170.24	79.09	169.09	115.11	152.71	93.87	115.21	60s ribosomal protein l7	gi|294438964|gb|ACV83305.2|hypothetical protein UP-4 [Dimocarpus longan]
Mj_1_GCCAAT_L005_R1_001_(paired)_trimmed_(paired)_contig_850	87.18	39.12	93.96	69.82	78.76	60.96	50.8	60s ribosomal protein l7	gi|294438964|gb|ACV83305.2|hypothetical protein UP-4 [Dimocarpus longan]
TR70714|c1_g3_i1	111.37	53.52	129.85	92.96	108.52	74.18	64.07	60s ribosomal protein l7	gi|294438964|gb|ACV83305.2|hypothetical protein UP-4 [Dimocarpus longan]
TR70714|c1_g3_i5	126.61	66.16	117.43	75.9	93.74	62.97	87.43	60s ribosomal protein l7	gi|294438964|gb|ACV83305.2|hypothetical protein UP-4 [Dimocarpus longan]
Mj_1_GCCAAT_L005_R1_001_(paired)_trimmed_(paired)_contig_6392	46.41	45.32	104	55.11	59.43	46.79	63.39	vacuolar atp synthase 21 kda proteolipid subunit	gi|29423617|gb|AAO73433.1|vacuolar membrane ATPase subunit c'' [Citrus limon]
Mj_1_GCCAAT_L005_R1_001_(paired)_trimmed_(paired)_contig_4335	20.89	21.51	32.57	32.31	25.98	28.02	32.94	sterol 14-demethylase	gi|293333061|ref|NP_001168886.1|uncharacterized protein LOC100382691 [Zea mays] gi|223973487|gb|ACN30931.1| unknown [Zea mays]
TR65858|c0_g1_i3	71.75	78.64	184.57	45.31	27.12	29.37	47.1	tubulin beta chain	gi|293331107|ref|NP_001167651.1|uncharacterized protein LOC100381281 [Zea mays] gi|194702760|gb|ACF85464.1| unknown [Zea mays]
TR53792|c0_g1_i1	175.11	4.16	91.88	6.38	13.3	2.23	50.25	histone h3	gi|291395639|ref|XP_002714192.1|PREDICTED: histone cluster 1, H3f-like [Oryctolagus cuniculus]
TR54862|c0_g1_i1	437.48	10.7	229.01	11.27	22.89	11.33	133.56	histone h3	gi|291395639|ref|XP_002714192.1|PREDICTED: histone cluster 1, H3f-like [Oryctolagus cuniculus]
TR47497|c0_g1_i1	193.94	152.66	337.24	400.01	401.8	322.95	382.23	14-3-3 protein	gi|291162643|gb|ADD79961.1|14-3-3 family protein [Dimocarpus longan] gi|291162645|gb|ADD79962.1| 14-3-3 family protein [Dimocarpus longan]
TR49188|c0_g1_i2	63.19	86.92	168.71	283.02	386.1	317.15	148.14	copper chaperone	gi|290886187|gb|ADD69807.1|copper transport protein ATOX1 [Hevea brasiliensis]
Mj_1_GCCAAT_L005_R1_001_(paired)_trimmed_(paired)_contig_35722	10.36	13.39	95.07	23.57	38.76	0.46	17.96	anthocyanidin synthase	gi|290579519|gb|ADD51355.1|anthocyanidin synthase [Theobroma cacao]
TR52034|c0_g1_i1	0.14	0	0	0	0	0	6.87	mads box protein	gi|290465691|gb|ADD25190.1|SEP1 [Nelumbo nucifera]
TR58140|c0_g1_i1	2.05	0.93	2.04	1.38	1.78	4.69	36.29	chitinase	gi|289719778|gb|ACH92946.2|class I chitinase [Dimocarpus longan] gi|301323233|gb|ADK70388.1| class I chitinase [Dimocarpus longan]
TR64252|c0_g2_i1	0.84	0.98	2.21	1.79	3.09	6.27	1.48	with no lysine kinase	gi|28874836|emb|CAC84087.1|ZIK1 protein [Medicago sativa]
TR76686|c1_g2_i3	1.97	5.22	0.45	6.3	1.22	0.33	0.56	nadh-plastoquinone oxidoreductase subunit 2	gi|288558990|sp|P0CC99.1|NU2C2_TOBACRecName: Full=NAD(P)H-quinone oxidoreductase subunit 2 B, chloroplastic; AltName: Full=NAD(P)H dehydrogenase, subunit 2 B; AltName: Full=NADH-plastoquinone oxidoreductase subunit 2 B gi|288561983|sp|P0CC98.1|NU2C1_TOBAC RecName: Full=NAD(P)H-quinone oxidoreductase subunit 2 A, chloroplastic; AltName: Full=NAD(P)H dehydrogenase, subunit 2 A; AltName: Full=NADH-p…
TR76686|c1_g2_i4	2.26	5.13	0.42	6.11	1.25	0.45	0.69	nadh-plastoquinone oxidoreductase subunit 2	gi|288558990|sp|P0CC99.1|NU2C2_TOBACRecName: Full=NAD(P)H-quinone oxidoreductase subunit 2 B, chloroplastic; AltName: Full=NAD(P)H dehydrogenase, subunit 2 B; AltName: Full=NADH-plastoquinone oxidoreductase subunit 2 B gi|288561983|sp|P0CC98.1|NU2C1_TOBAC RecName: Full=NAD(P)H-quinone oxidoreductase subunit 2 A, chloroplastic; AltName: Full=NAD(P)H dehydrogenase, subunit 2 A; AltName: Full=NADH-p…
TR51330|c0_g1_i1	201.16	30	1312.48	155.64	499.71	10.34	837.13	protease inhibitor ii	gi|28624546|gb|AAL85480.1|defensin protein 1 [Prunus persica]
Mj_1_GCCAAT_L005_R1_001_(paired)_trimmed_(paired)_contig_23217	8.25	4.65	2.94	10.92	20.03	11.26	19.73	stem-specific protein	gi|284521002|gb|ADB93076.1|stem-specific protein tsjt1, putative [Jatropha curcas]
TR59562|c0_g1_i1	7.98	3.92	2.79	10.7	18.11	9.56	16.61	stem-specific protein	gi|284521002|gb|ADB93076.1|stem-specific protein tsjt1, putative [Jatropha curcas]
TR63343|c0_g1_i1	6.78	3.46	4.28	10.2	21.22	8.21	16.49	stem-specific protein	gi|284521002|gb|ADB93076.1|stem-specific protein tsjt1, putative [Jatropha curcas]
TR73084|c1_g6_i1	12.58	9.64	19.81	27.18	33.92	22.91	26.7	upf0587 protein c1orf123 homolog	gi|284520996|gb|ADB93073.1|conserved hypothetical protein [Jatropha curcas]
Mj_1_GCCAAT_L005_R1_001_(paired)_trimmed_(paired)_contig_1541	56.87	79.66	199.27	115.02	145.64	113.5	80.48	profilin	gi|284520994|gb|ADB93072.1|profilin-1 [Jatropha curcas]
TR56314|c0_g1_i1	120.89	158.76	359.72	219.44	258.03	204.97	162.16	profilin	gi|284520994|gb|ADB93072.1|profilin-1 [Jatropha curcas]
TR52769|c0_g1_i1	29.91	33	126.44	88.62	100.25	91.05	50.93	erwinia induced protein 2	gi|284520992|gb|ADB93071.1|conserved hypothetical protein [Jatropha curcas]
Mj_1_GCCAAT_L005_R1_001_(paired)_trimmed_(paired)_contig_10087	45.48	39.27	132.46	49.04	81.9	42.85	61.68	conserved hypothetical protein	gi|284520986|gb|ADB93068.1|conserved hypothetical protein [Jatropha curcas]
TR60571|c0_g1_i1	178.97	197	861.98	228.08	186.86	168.69	217.42	tonoplast intrinsic protein	gi|284520984|gb|ADB93067.1|aquaporin [Jatropha curcas]
C966066	3.77	12.47	0.67	0.57	1.6	0.16	5.91	catechol o-methyltransferase	gi|284437809|gb|ADB85561.1|O-methyltransferase-like protein [Prunus mume]
TR33763|c0_g1_i2	3.43	6.75	0.13	0.36	0.68	0	4.4	caffeic acid 3-o-methyltransferase	gi|284437809|gb|ADB85561.1|O-methyltransferase-like protein [Prunus mume]
TR46974|c0_g1_i3	2.22	8.51	0.26	0	1.65	0.25	2.84	catechol o-methyltransferase	gi|284437809|gb|ADB85561.1|O-methyltransferase-like protein [Prunus mume]
TR55202|c1_g1_i1	13.32	30.27	48.24	653.82	885.39	1105.05	83.82	translation factor	gi|284433802|gb|ADB85107.1|translation initiation factor-like protein [Jatropha curcas]
TR75504|c0_g6_i1	8.78	0.77	16.6	17.23	11.07	7.34	7.06	protein in2-1 homolog b-like	gi|284433794|gb|ADB85103.1|glutathione S-transferase omega [Jatropha curcas]
TR75504|c0_g7_i1	19.97	29.38	44.15	55.55	36.27	20.46	68.68	protein in2-1 homolog b-like	gi|284433794|gb|ADB85103.1|glutathione S-transferase omega [Jatropha curcas]
TR75504|c0_g7_i2	11.23	14.56	18.59	36.49	25.27	17.5	41.8	protein in2-1 homolog b-like	gi|284433794|gb|ADB85103.1|glutathione S-transferase omega [Jatropha curcas]
TR60623|c0_g1_i1	7.98	4.58	14.83	11.81	11.39	11.8	11.36	erg28 like protein	gi|284433790|gb|ADB85101.1|hypothetical protein [Jatropha curcas]
TR60623|c0_g1_i2	12.56	5.14	41.6	7.68	9.91	5.77	16.26	erg28 like protein	gi|284433790|gb|ADB85101.1|hypothetical protein [Jatropha curcas]
TR60623|c1_g1_i1	6.71	3.72	10.95	7.34	7.68	9.12	5.84	erg28 like protein	gi|284433790|gb|ADB85101.1|hypothetical protein [Jatropha curcas]
TR57998|c0_g3_i1	1.29	0.35	0.43	12.26	65.14	0	3.08	protease inhibitor	gi|284433788|gb|ADB85100.1|proteinase inhibitor [Jatropha curcas]
TR57699|c1_g1_i2	39.51	76.92	20.93	34.72	38.4	17.85	35.13	glutathione peroxidase	gi|284433780|gb|ADB85096.1|putative glutathione peroxidase [Jatropha curcas]
TR57699|c1_g1_i3	15.07	26.41	9.46	12.67	16.01	5.94	12.59	glutathione peroxidase	gi|284433780|gb|ADB85096.1|putative glutathione peroxidase [Jatropha curcas]
Mj_1_GCCAAT_L005_R1_001_(paired)_trimmed_(paired)_contig_2419	22.88	43.67	88.11	134.54	161.4	118.89	55.71	actin depolymerizing	gi|284433764|gb|ADB85088.1|actin-depolymerizing factor 6 [Jatropha curcas]
TR47047|c0_g1_i1	24.59	47.61	95.89	144.5	163.03	122.47	57.88	actin depolymerizing factor 6	gi|284433764|gb|ADB85088.1|actin-depolymerizing factor 6 [Jatropha curcas]
scaffold12981	348.53	169.54	263.85	315.82	177.46	202.57	427.72	polyubiquitin	gi|28436481|gb|AAO43307.1|putative polyubiquitin [Arabidopsis thaliana]
Mj_1_GCCAAT_L005_R1_001_(paired)_trimmed_(paired)_contig_1239	348.22	280.49	283.05	143.48	107.85	3.9	144.23	chalcone synthase	gi|283827864|gb|ADB44077.1|chalcone synthase [Litchi chinensis]
TR61683|c1_g1_i2	505.63	402	426.7	197.11	155.33	7.56	202.02	chalcone synthase	gi|283827864|gb|ADB44077.1|chalcone synthase [Litchi chinensis]
TR58683|c0_g1_i1	23.23	29.94	66.7	73.67	41.57	44.83	32.44	udp-glucose dehydrogenase	gi|283488489|gb|ADB24766.1|UDP-D-glucose dehydrogenase [Gossypium hirsutum]
[truncated: 28,511 more rows]
