# Supplementary material for: Gene-Metabolite Network Analysis Revealed Tissue-Specific Accumulation of Therapeutic Metabolites in Mallotus japonicus
Source: Int J Mol Sci. 2021 Aug 17;22(16):8835. doi: 10.3390/ijms22168835 (PMC8396295; doi:10.3390/ijms22168835)
Supplement: Supplementary file 1 [file ijms-22-08835-s001.zip › Supplementary_Table S11_WCNA_modules_identified_using_transcript_data with legend_Megha.xlsx]

## Sheet: TransM1
Table S11 Summary of transcript modules and the included transcripts using WCNA analysis for highly expressed transcripts in Mallotus japonicus.
Sequence_Name	FPKM_Young_Leaf	FPKM_Mature_Leaf	FPKM_Young_Stem	FPKM_Mature_Stem	FPKM_Bark	FPKM_Central_Cylinder	FPKM_Inflorescence
TR71229|c1_g2_i2	3.41	4.28	7.27	6.74	6.66	4.24	4.19
TR62209|c0_g1_i6	7.52	6.11	5.39	5.86	6.41	6.79	7.52
Mj_1_GCCAAT_L005_R1_001_(paired)_trimmed_(paired)_contig_5655	22.6	15.09	56.89	33.66	40.82	0.51	9.31
TR62284|c0_g1_i1	24.38	18.16	60.32	34.46	43.37	0.76	9.11
TR77186|c0_g2_i2	23.46	22.39	15.43	22.57	14.66	30.05	22.05
TR79507|c0_g1_i3	6.84	5.11	2.94	3.75	4.86	6.23	5.74
TR59924|c0_g1_i2	2.92	3.76	10.09	5.19	9.65	0.19	1.95
Mj_1_GCCAAT_L005_R1_001_(paired)_trimmed_(paired)_contig_11455	13.19	10.11	24.55	14.9	22.52	4.73	5.86
TR73168|c0_g1_i1	10.41	9	23.8	16.17	24.17	5.1	5.12
TR73168|c0_g2_i2	8.25	7.45	11.96	10.19	12.25	3.17	2.5
TR76227|c0_g2_i1	13.49	9	23.28	14.64	20.17	4.72	5.1
TR76227|c0_g2_i3	12.68	9.51	21.76	15.68	21.76	4.3	4.62
TR55334|c0_g3_i1	0.69	1.12	5.46	2.76	5.3	0.15	0.27
TR60405|c0_g1_i1	5.16	1.93	0.79	1.78	2.02	4.12	3.55
TR49762|c0_g1_i1	0.32	1.36	4.1	1	5.44	0	0.94
TR71257|c1_g1_i2	0.27	1.26	8.75	5.67	9.58	0.12	1.42
Mj_1_GCCAAT_L005_R1_001_(paired)_trimmed_(paired)_contig_25323	4.91	4.25	2.49	3.37	1.34	5.95	3.96
TR74421|c0_g1_i4	4.91	4.49	3.76	4.81	3.25	5.48	4.76
TR73878|c0_g2_i3	12.35	8.76	6.65	4.87	8.33	10.87	11.53
TR76268|c0_g3_i3	6.85	6.02	7.85	6.75	8.84	5.75	6.2
TR76952|c1_g1_i1	5.08	5.69	10.7	6.39	9.22	0.91	0.89
Mj_1_GCCAAT_L005_R1_001_(paired)_trimmed_(paired)_contig_28625	5.99	9.65	33.02	42.45	32.46	2.12	9.2
Mj_1_GCCAAT_L005_R1_001_(paired)_trimmed_(paired)_contig_24386	7.2	8.47	12.38	11.7	10.74	7.56	7.63
TR79258|c1_g1_i2	8.32	5.49	5.32	5.75	4.92	8.75	7.61
TR63799|c0_g1_i1	1.43	2.57	5.88	4.67	3.57	2.12	2.04
TR48669|c0_g1_i2	30.51	29.49	57.81	46.33	52.47	29.74	36.03
TR77484|c2_g2_i2	18.73	10.62	10.51	9.51	12.2	16.75	17.32
Mj_1_GCCAAT_L005_R1_001_(paired)_trimmed_(paired)_contig_5263	6.09	4.49	3.14	3.81	2.26	7.55	3.99
TR79297|c1_g1_i2	4.45	3.41	2.9	3.59	2.72	5.33	4.46
TR64046|c0_g1_i1	2.26	1.74	12.91	7.69	13.7	1.2	2.44
Mj_1_GCCAAT_L005_R1_001_(paired)_trimmed_(paired)_contig_52	14.28	13.02	11.19	12.94	11.26	15.03	12.76
TR73324|c0_g1_i1	16.07	15.55	13.23	14.08	12.41	17.18	15.43
scaffold10944	4.28	8.34	11.08	7.6	14.57	1.33	1.69
TR61289|c1_g1_i1	1.74	3.77	8.09	8.61	7.65	0.1	0.79
TR72243|c0_g1_i2	2.17	4.05	5.16	3.52	4.18	0.81	0.64
TR68413|c0_g1_i7	10.87	8.95	6.21	7.19	6.5	10.21	9.3
TR76246|c0_g1_i1	10.39	9.2	5.89	5.43	4.77	9.99	9.2
TR45384|c0_g1_i4	1.63	5.55	11.75	8.63	6.23	2.61	1.79
TR54152|c0_g1_i1	9.3	24.54	56.03	53.18	60.43	12.09	16.21
TR72596|c0_g1_i5	8.41	4.97	1.19	3.75	4.8	6.09	6.56
TR70327|c1_g1_i1	12.23	18.42	19.9	16.57	16.74	15.88	12.99
Mj_1_GCCAAT_L005_R1_001_(paired)_trimmed_(paired)_contig_3382	8.69	5.01	3.41	4.12	5.59	6.07	8.26
C952822	4.22	3.57	3.31	4.66	2.46	4.95	5.09
TR45676|c0_g1_i1	1.45	6.65	9.39	4.37	8.03	0	1
Mj_1_GCCAAT_L005_R1_001_(paired)_trimmed_(paired)_contig_7332	6.91	6.05	5.78	6.38	4.57	8.17	8.33
TR75189|c0_g1_i2	2.92	1.23	4.85	3.59	6.53	1.2	2.66
Mj_1_GCCAAT_L005_R1_001_(paired)_trimmed_(paired)_contig_6197	4.97	4.63	3.92	4.41	3.45	5.76	4.82
TR62368|c0_g1_i2	5.06	3.53	8.4	8.01	7.88	2.8	2.49
TR79154|c0_g1_i3	3.38	4.01	7.34	4.19	6.23	0.63	4.48
TR57143|c0_g1_i1	5.21	4.87	9.96	7.35	9.73	5.04	5.34
TR62491|c0_g1_i1	11.35	31.08	55.61	34.61	44.53	32.03	11.7
Mj_1_GCCAAT_L005_R1_001_(paired)_trimmed_(paired)_contig_522	20.36	20.11	14.1	14.88	14.23	22.13	17.19
TR58871|c1_g1_i1	17.6	16.38	12.61	14.44	12.44	21.01	15.76
Mj_1_GCCAAT_L005_R1_001_(paired)_trimmed_(paired)_contig_7830	9.9	8.16	5.97	8.15	7.06	9.17	9.91
TR74547|c0_g2_i8	10.38	8.65	6.59	8.25	7.89	9.98	10.79
Mj_1_GCCAAT_L005_R1_001_(paired)_trimmed_(paired)_contig_15311	2.27	5.57	11.89	8.38	8.26	4.07	2.84
TR79348|c3_g4_i4	3.31	8.76	16.79	16.22	16.17	4.99	5.96
TR79348|c3_g4_i5	2.76	6.71	16.12	10.66	11.25	4.7	4.25
TR79348|c3_g4_i6	3.74	7.59	17.23	12.11	11.87	3.8	5.37
TR79386|c0_g2_i5	2.37	5.65	14.26	13.61	11.95	4.44	4.27
TR64703|c0_g1_i3	1.09	2.78	4.49	6.05	3.8	0.81	1.43
TR64703|c1_g1_i1	3.95	6.14	11.7	13.69	10.27	1.3	3.17
TR48961|c0_g1_i2	7	5.6	3.78	4.6	3.03	6.75	6.3
scaffold11424	5.08	5.12	7.95	6.72	7.2	3.74	5.09
scaffold11425	5.28	6.4	13.08	10.03	11.49	4.93	6.55
TR42322|c0_g1_i1	31.59	34.01	28.48	34.18	22.48	37.63	39.52
Mj_1_GCCAAT_L005_R1_001_(paired)_trimmed_(paired)_contig_32587	4.02	8.06	24.43	14.06	17.49	5.94	8.29
Mj_1_GCCAAT_L005_R1_001_(paired)_trimmed_(paired)_contig_7841	13.02	12.02	8.08	9.67	9.24	13.63	15.36
scaffold1385	4.8	4.01	3.47	3.48	3.79	5.07	5.49
TR59842|c0_g1_i3	2.01	2.57	12.64	11.68	15.99	2.23	2.86
TR79561|c2_g4_i11	7.35	5.18	3.87	4.9	6.06	6.42	6.85
TR59420|c1_g2_i1	5.39	8.93	12.49	9.73	12.37	4.25	8.06
TR39992|c0_g1_i1	0.97	5.01	4.72	6.8	6	0.15	1.09
TR46096|c0_g1_i1	3.07	10.64	15.13	6.38	20.03	0	3.02
TR46096|c0_g1_i2	2.32	11.09	20.37	14.14	20.77	0.2	3.69
TR79868|c0_g1_i1	7.74	6.49	4.09	6.7	4.39	8.43	8.25
Mj_1_GCCAAT_L005_R1_001_(paired)_trimmed_(paired)_contig_21532	7.79	4.53	4.13	5.23	5.09	7.41	8.39
TR68482|c1_g2_i2	5.41	2.03	6.09	6.69	7	1.56	1.62
TR57815|c0_g1_i2	17	12.92	21.84	17.66	24.97	11.74	15.24
TR71466|c1_g2_i2	0.7	4.04	7.17	3.84	5.05	3.04	0.88
Mj_1_GCCAAT_L005_R1_001_(paired)_trimmed_(paired)_contig_51242	3.77	8.7	19.41	9.72	21.82	0.52	2.79
TR53874|c0_g1_i1	2.04	5.52	8.28	5.95	9.18	0	0.45
TR73252|c0_g3_i2	10.54	15.84	22.59	17.68	16.95	9.1	12.01
TR67696|c0_g1_i6	6.08	4.22	13.54	9.32	10.61	1.97	6.22
TR79027|c1_g1_i1	28.38	17.86	17.11	17.4	19.39	26.36	27.15
scaffold12362	13.06	8.64	6.12	9.14	7.94	11.61	12.06
TR71191|c0_g1_i13	1.24	3.78	5.7	3.86	4.2	2.98	1.17
TR71191|c0_g1_i6	1.09	3.78	6.22	4.21	5.49	2.69	1.46
TR71431|c0_g2_i5	0.97	3.81	6.07	4.64	5.2	3.05	2.1
Mj_1_GCCAAT_L005_R1_001_(paired)_trimmed_(paired)_contig_153	8.31	5.53	4.95	4.84	4.99	8.44	8.21
TR75279|c0_g1_i3	5.63	5.92	19.26	13.13	18.73	0.89	1.58
TR75279|c1_g1_i2	6.54	6.87	22.95	15.48	21.27	0.41	2.33
scaffold13188	5.44	5.91	15.03	14.17	16.58	0.16	2.55
TR41606|c0_g2_i1	22.61	12.53	12.03	11.71	11.92	22.74	20.21
Mj_1_GCCAAT_L005_R1_001_(paired)_trimmed_(paired)_contig_13588	6.46	5.5	16.33	16.26	15.3	4.23	7.29
Mj_1_GCCAAT_L005_R1_001_(paired)_trimmed_(paired)_contig_6701	8.97	5.95	33.86	23.7	25.66	7.23	10.47
TR66689|c0_g1_i1	7.3	5.59	28.26	22.56	24.07	7.07	8.54
scaffold13805	6.83	4.56	22.15	19.12	18.75	6.29	7.11
scaffold13806	4.8	3.46	15.83	15.4	17.97	5.25	5.61
TR73042|c1_g1_i2	8.15	6.91	16.6	12.95	17.81	0.14	3.7
TR73042|c2_g1_i2	10.39	5.71	22.38	10.77	19.38	0.98	2.33
TR79821|c0_g1_i2	6.71	5.5	4.61	4.7	4.18	6.47	6.5
Mj_1_GCCAAT_L005_R1_001_(paired)_trimmed_(paired)_contig_20256	3.23	5.4	9.83	8.35	7.66	2.99	4.52
TR58375|c1_g1_i1	11.11	8.41	15.5	10.19	19.73	3.69	6.22
TR76650|c1_g1_i6	6.16	6.79	5.21	5.15	4.86	7.45	6.72
TR56675|c0_g1_i2	41.69	27.49	10.86	32.24	13.2	49.79	28.24
TR56675|c0_g1_i3	30.04	21.37	9.29	30.08	11.44	38.11	24.94
TR77555|c1_g1_i1	7.93	6.63	4.44	5.08	4.5	8.83	6.21
scaffold10743	7.06	5.99	5.91	5.89	5.68	7.47	7.91
TR73778|c0_g2_i1	62.23	66.4	8.64	36.68	23.72	60.68	53.22
TR64763|c1_g1_i1	11.14	8.4	5.86	8.12	9.08	9.19	11.48
scaffold11253	9.08	5.12	5.3	5.88	5.55	8.16	8.17
TR75526|c0_g2_i2	16.79	10.94	7.25	11.9	12.3	14.51	18
Mj_1_GCCAAT_L005_R1_001_(paired)_trimmed_(paired)_contig_5489	8.12	9.14	32.41	36.83	33.54	2.78	6.74
Mj_1_GCCAAT_L005_R1_001_(paired)_trimmed_(paired)_contig_8266	2.12	3.58	6.71	5.68	8.51	0.36	2.25
TR56267|c0_g1_i1	2.94	1.84	5.09	3.66	5.8	0.2	1.45
TR56267|c0_g1_i2	5.14	3.82	8.24	8.85	9.83	0.32	4.37
TR68732|c2_g1_i1	6.42	6.46	14.41	15.3	18.34	0.79	4.93
TR79522|c1_g3_i8	5.32	4.08	2.27	2.72	2.84	4.8	4.17
TR69007|c0_g1_i4	10.23	8.9	7.47	8.59	7.48	9.78	10.24
Mj_1_GCCAAT_L005_R1_001_(paired)_trimmed_(paired)_contig_598	14.08	10.16	8.19	11.1	6.72	14.32	11.6
TR60144|c0_g1_i2	8.39	10.68	20.95	19.63	16.34	9.18	10.58
TR64979|c1_g1_i3	8.73	10.37	21.1	18.06	15.96	9.33	9.17
TR64979|c1_g1_i6	7.94	9.51	17.4	14.85	15.35	8.68	8.69
Mj_1_GCCAAT_L005_R1_001_(paired)_trimmed_(paired)_contig_17177	7.01	5.84	40.83	36.75	42.93	3.59	9.74
TR79126|c1_g2_i4	30.09	27.79	21.96	20.54	26.91	35.61	36.44
TR49513|c0_g1_i4	2.15	1.45	5.2	3.61	5.3	1.68	1.74
TR73750|c1_g1_i2	13.65	9.33	6.11	11.67	8.1	15.33	10.2
C972610	10.02	10.57	23.03	19.63	20.37	10.11	11.82
TR73352|c0_g1_i1	13.55	12.36	25.15	15.75	22.46	9.85	13.67
TR79290|c1_g1_i5	4.22	2.95	2.27	2.02	1.68	3.86	5.12
Mj_1_GCCAAT_L005_R1_001_(paired)_trimmed_(paired)_contig_878	5	16.8	18.12	16.98	16.02	3.72	6.39
TR51808|c0_g1_i1	9.25	8.79	17.25	12.15	14.22	6.46	8.5
TR54088|c0_g1_i2	6.75	7.31	12.84	10.52	11.64	5.12	8.16
TR76516|c0_g1_i11	2.66	2.14	5.28	4.68	4.19	0.31	1.8
TR79868|c0_g1_i3	31.7	30.23	23.55	26.52	25.87	36.79	41.46
Mj_1_GCCAAT_L005_R1_001_(paired)_trimmed_(paired)_contig_40765	1.78	0.46	8.93	6.4	9.41	0.18	1.43
Mj_1_GCCAAT_L005_R1_001_(paired)_trimmed_(paired)_contig_3485	15.64	11.89	8.09	9.3	7.72	16.36	14.12
TR78115|c0_g2_i1	5.81	4.69	2.02	3.37	2.12	6.15	5.44
Mj_1_GCCAAT_L005_R1_001_(paired)_trimmed_(paired)_contig_5051	25.31	46.63	58.2	41.59	45.41	22.66	20.59
TR74684|c3_g1_i1	6.68	7.52	182.23	124.83	192.58	7.79	0.79
TR74684|c3_g1_i2	9.14	15.18	111.97	63.62	102.02	9.08	4.09
TR75429|c0_g3_i2	9.65	11.85	152.3	140.15	193.57	14.06	3.02
TR77646|c1_g3_i2	2.78	2.35	3.85	2.6	5.87	0.18	2.26
scaffold13571	8.35	7.4	6.67	7.35	6.63	8.91	8.83
TR59626|c0_g1_i1	40.49	64.38	97.26	67	76.7	46.51	33.6
TR70388|c1_g1_i5	6.66	8.27	11.95	9.7	11.34	1.63	2.41
coral_Transcript	1358.01	1382.67	2470.02	2111.1	2410.71	1218.68	1229.61	Sum
coral_Transcript	9.23816	9.40592	16.8029	14.3612	16.3994	8.29034	8.36469	Average

## Sheet: TransM2
Table S11 Summary of transcript modules and the included transcripts using WCNA analysis for highly expressed transcripts in Mallotus japonicus.
Sequence_name	FPKM_Young_Leaf	FPKM_Mature_Leaf	FPKM_Young_Stem	FPKM_Mature_Stem	FPKM_Bark	FPKM_Central_Cylinder	FPKM_Inflorescence
TR79065|c1_g3_i8	308.98	236.89	382.61	431.59	248.64	356.57	265.77
Mj_1_GCCAAT_L005_R1_001_(paired)_trimmed_(paired)_contig_6976	10.05	10.11	26.75	16.64	15.54	23.09	13.69
TR50923|c0_g1_i1	9.96	9.81	26.21	16.77	15.2	24.63	15.2
TR79594|c3_g3_i4	10.74	7.56	15.03	12.19	14.5	15.93	11.17
Mj_1_GCCAAT_L005_R1_001_(paired)_trimmed_(paired)_contig_75149	0	0.48	2.06	1.58	0	5.79	0
TR79039|c0_g6_i12	151.53	121.25	170.6	186.2	103.18	150.01	139.94
C907925	2.82	1.9	5.32	1.34	3.35	5.6	4.99
Mj_1_GCCAAT_L005_R1_001_(paired)_trimmed_(paired)_contig_24382	3.31	5.12	7.24	4.76	5.9	7	4.04
TR44582|c1_g1_i1	102.19	77.58	186.25	212.2	59.84	187.13	80.61
TR35443|c0_g1_i1	74.53	54.65	100.73	109.02	93.14	144.96	68.66
Mj_1_GCCAAT_L005_R1_001_(paired)_trimmed_(paired)_contig_17411	17.28	11.55	25.99	14.03	25.67	25.67	18.71
TR76981|c2_g3_i5	6.51	6.61	3	3.14	4.23	2.51	4.46
TR71357|c0_g1_i1	22.89	23.2	67.52	60.55	41.09	74.02	41.94
scaffold10309	15.67	14.83	45.12	37.62	27.3	44.25	25.22
TR47518|c0_g1_i1	1.34	2.36	5.27	4.25	2	2.23	2.64
TR12488|c0_g1_i1	15.36	14.73	23.29	27.55	18.57	26.42	15.87
Mj_1_GCCAAT_L005_R1_001_(paired)_trimmed_(paired)_contig_1269	102.94	58.62	203.71	205.94	145.71	181.68	88.57
TR43292|c0_g1_i1	132.97	72.03	286.22	256.19	201.57	241.7	112.01
TR59421|c0_g3_i1	10.57	9.87	18.27	21.25	16.37	27.55	10.9
TR73454|c2_g9_i1	4.24	4.26	8.22	5.83	5.49	6.5	5.76
TR72803|c1_g1_i2	5.49	3.61	7.04	4.27	6.58	9.63	5.54
TR77742|c0_g2_i4	2.23	2.01	2.89	3.47	2.94	5.31	2.63
TR73328|c0_g1_i2	8.1	7.88	10.56	10.08	8.4	15.09	8.96
TR46618|c0_g1_i1	1.29	2.73	7.01	5.32	3.46	2.57	3.56
TR79763|c1_g1_i4	5.03	5.48	9.44	7.23	7.89	7.86	5.55
C951852	2.89	3.68	6.95	6.89	5.59	9.38	5.83
TR53525|c0_g1_i2	16.98	18.64	18.87	17.12	18.35	19.61	17.28
TR65555|c1_g1_i2	2.57	3.33	6.47	4.55	4.71	8.12	3.31
scaffold1448	4.58	4.25	6.36	6.76	6.63	9.66	6.92
Mj_1_GCCAAT_L005_R1_001_(paired)_trimmed_(paired)_contig_87138	0	0	2.12	2.03	0.38	6.25	0
Mj_1_GCCAAT_L005_R1_001_(paired)_trimmed_(paired)_contig_15087	17.76	13.09	41.82	26.51	30.05	20.86	26.36
TR54938|c0_g1_i1	14.67	12.48	38.21	27.22	28	21.88	23.84
TR73295|c0_g1_i4	1.96	4.68	10.58	8.55	8.54	6.34	4.83
scaffold11769	2.92	1.62	5.79	7.08	3.45	5.29	2.58
Mj_1_GCCAAT_L005_R1_001_(paired)_trimmed_(paired)_contig_13538	10.81	9.52	31.96	22.77	13.66	24.73	17.02
TR57775|c1_g1_i2	7.34	8.24	20.84	13.94	11.41	19.82	8.66
TR64818|c1_g1_i4	1.8	2.11	5.04	2.85	3.72	5.07	1.77
Mj_1_GCCAAT_L005_R1_001_(paired)_trimmed_(paired)_contig_68731	0.05	2.07	29.52	20.86	0	49.33	0.1
Mj_1_GCCAAT_L005_R1_001_(paired)_trimmed_(paired)_contig_2864	11.62	10.41	15.75	12.74	13.04	21.64	12.5
TR70326|c0_g1_i1	12.21	10.22	18.43	14.91	18.2	23.13	15.15
TR57735|c0_g1_i1	12.35	12.28	30.75	24.07	14.85	23.03	17.05
TR76109|c2_g1_i4	4.03	3.09	6.85	4.27	5.36	6.97	4.42
Mj_1_GCCAAT_L005_R1_001_(paired)_trimmed_(paired)_contig_73152	0.35	0.22	40.73	22.56	2.11	46.44	0.35
TR68414|c0_g3_i2	4.05	3.9	4.94	4.84	4.08	6.29	3.77
TR68827|c0_g2_i2	6.28	5.85	7.91	8.9	6.42	8.32	6.24
TR58221|c0_g1_i1	47.46	41.91	68.69	55.83	53.52	68.73	41.9
TR64452|c0_g2_i7	2.92	2.61	5.52	4.79	4.12	4.04	3.76
Mj_1_GCCAAT_L005_R1_001_(paired)_trimmed_(paired)_contig_3433	26.21	31.77	55.75	35.93	60.12	72.78	38.85
TR74895|c0_g4_i1	27.07	38.65	58.98	41.12	61.8	71.88	45.99
scaffold13828	18.35	22.43	34.67	24.61	35.3	46.82	26.09
TR57553|c0_g2_i1	123.3	107.85	289.81	181.64	246.64	251.78	158.22
C927978	335.71	282.78	636.79	455.31	578.51	590.52	418.49
TR57565|c0_g2_i1	278.24	253.1	580.14	371.62	493.24	493.95	349.74
TR72637|c4_g1_i1	0.94	3.38	6.8	2.59	2.3	9.62	4.7
Mj_1_GCCAAT_L005_R1_001_(paired)_trimmed_(paired)_contig_229	15.95	10.48	22.18	21.31	22.25	27.27	19.79
Mj_1_GCCAAT_L005_R1_001_(paired)_trimmed_(paired)_contig_10313	34.67	29.55	69.36	52.01	54.54	42.17	38.25
scaffold10964	24.14	19.45	43.34	32.33	32.94	29.65	29.31
TR64002|c0_g1_i1	5.69	8.78	37.1	14.82	20.95	29.81	14.67
scaffold10975	15.21	14.09	36.88	27.27	35.01	33.76	28.19
TR57423|c0_g1_i3	3.68	2.43	7.42	4.47	3.84	7.1	4.69
TR75170|c1_g1_i4	2.05	1.96	5.3	3.24	2.44	3.85	2.82
TR70832|c0_g1_i1	8.88	9.43	27.49	20.35	23.84	22.26	17.51
TR64906|c1_g1_i4	4.16	3.46	6.38	5.44	4.05	4.81	3.03
TR62338|c0_g1_i3	5.11	4.5	13.41	7.49	10.97	10.91	9.94
TR73328|c0_g1_i1	8.75	8.12	10.61	10.31	9.22	15.5	9.27
TR75283|c0_g2_i2	1.71	3.24	5.19	5.16	4.87	8.94	4.89
TR61183|c0_g1_i1	11.01	11.66	8.11	9.16	10.79	11.1	10.15
Mj_1_GCCAAT_L005_R1_001_(paired)_trimmed_(paired)_contig_15261	0.96	3.64	4.27	1.22	0.86	10.75	1.13
TR53224|c0_g1_i1	19.33	23.12	72.78	34.13	53.15	41.69	35.1
TR72113|c0_g1_i5	5.08	3.69	5.83	4.31	4.18	5.62	4.61
Mj_1_GCCAAT_L005_R1_001_(paired)_trimmed_(paired)_contig_2080	118.97	79.49	372.69	255.43	213.63	175.69	165.11
Mj_1_GCCAAT_L005_R1_001_(paired)_trimmed_(paired)_contig_7311	84.73	97.66	208.23	250.23	168.63	179.48	126.82
TR72230|c5_g3_i2	40.55	45.96	123.12	98.71	137.37	159	94.02
Mj_1_GCCAAT_L005_R1_001_(paired)_trimmed_(paired)_contig_7874	4.87	8.14	14.81	12.57	8.68	7.16	5.44
TR72118|c1_g2_i2	22.79	28.24	68.36	47.34	49.25	40.59	24.94
TR72118|c1_g2_i3	28.8	30.84	57.27	62.93	53.32	52.6	32.15
scaffold14110	19.99	24.64	53.06	39.89	37.93	34.93	20.05
scaffold12901	2.68	1.82	4.5	4.57	2.87	5.12	3.47
Mj_1_GCCAAT_L005_R1_001_(paired)_trimmed_(paired)_contig_1541	56.87	79.66	199.27	115.02	145.64	113.5	80.48
TR56314|c0_g1_i1	120.89	158.76	359.72	219.44	258.03	204.97	162.16
TR52769|c0_g1_i1	29.91	33	126.44	88.62	100.25	91.05	50.93
TR58683|c0_g1_i1	23.23	29.94	66.7	73.67	41.57	44.83	32.44
TR46743|c0_g1_i1	7.18	6.16	11.56	9.07	5.26	9.76	4.77
TR66072|c0_g1_i1	5.51	6.55	19.77	19.9	6.63	9.84	3.87
scaffold13765	0.95	1.54	4.81	1.66	1.43	6.46	0.47
TR77063|c1_g1_i2	3.84	6.06	10.37	5.72	1.34	10.23	4.89
TR57994|c0_g1_i1	32.29	30.85	62.45	63.5	80.98	94.48	56.67
Mj_1_GCCAAT_L005_R1_001_(paired)_trimmed_(paired)_contig_45273	4.81	7.05	30.83	25.38	21.28	58.64	9.04
scaffold11506	3.69	2.12	9.01	6.61	5.89	7.13	4.73
TR50438|c0_g2_i1	2.38	1.28	4.39	3.79	3.34	8.27	2.94
TR79052|c0_g2_i7	0	0	6.81	1.83	3.17	2.35	0.19
Mj_1_GCCAAT_L005_R1_001_(paired)_trimmed_(paired)_contig_18053	4.15	4.06	6.72	4.68	5.63	5.92	5.64
TR61502|c0_g2_i2	4.87	8.76	1.84	1.54	9.01	1.08	4.22
TR76168|c0_g3_i2	5.78	6.08	4.25	4.34	5.43	5.46	6.32
TR67787|c0_g1_i2	1.23	1.54	4.88	4.34	4.48	9.11	4.61
TR70175|c0_g1_i7	10.13	6.77	16.21	9.85	9.35	16.05	12.64
Mj_1_GCCAAT_L005_R1_001_(paired)_trimmed_(paired)_contig_19346	5.5	6.45	16.74	12.78	12.97	19.04	9.06
TR65555|c1_g1_i1	5.28	6.19	18.08	13.09	13.87	18.4	9.45
TR71587|c0_g3_i2	6.03	6.58	34.72	50.95	15.44	57.47	7.5
TR70350|c1_g1_i2	13.04	9.38	19.73	20.74	24.96	29.89	17
Mj_1_GCCAAT_L005_R1_001_(paired)_trimmed_(paired)_contig_827	14.41	12.71	22.5	21.59	25.05	31.69	19.12
TR74039|c0_g1_i3	17.03	14.68	27.06	26.1	30.06	36.66	21.38
TR74039|c0_g1_i4	8.82	8.5	16.04	18.49	20.58	24.54	14.34
Mj_1_GCCAAT_L005_R1_001_(paired)_trimmed_(paired)_contig_15800	22.2	19.05	56.34	51.07	41.08	27.29	31.7
TR58861|c0_g1_i6	2.21	3.04	5.49	5.27	4.96	9.28	4.12
Mj_1_GCCAAT_L005_R1_001_(paired)_trimmed_(paired)_contig_5646	2.73	1.85	6.78	5.31	4.65	6.9	3.18
TR59601|c0_g1_i3	3.51	4.33	17.89	13.76	11.8	14.63	6.29
TR59601|c0_g1_i6	4.19	5.29	16.54	11.17	9.85	12.73	7.83
TR59601|c0_g1_i7	4.51	6.61	21.37	11.97	8.93	15.22	10.52
scaffold12063	2.69	4.16	12.13	8.16	7.13	12.13	4.57
TR113999|c0_g1_i1	6.56	4.98	7.95	8.25	5.76	10.26	6.65
TR64160|c0_g1_i1	1.52	1.39	3.95	3.93	4.38	6.29	3.32
TR76212|c0_g1_i6	3.76	3.41	8.64	5.55	5.51	9.09	5.53
TR76212|c0_g1_i9	2.06	0.88	5.92	4.7	3.74	8.58	2.25
TR62442|c2_g1_i1	88.26	88.4	201.13	123.99	122.3	167.6	85.4
Mj_1_GCCAAT_L005_R1_001_(paired)_trimmed_(paired)_contig_16179	3.3	6.83	7.78	8.03	11.34	14.87	7.75
TR70597|c0_g1_i2	2.24	3.2	6.5	3.95	3.97	4.73	3.96
TR70597|c0_g1_i6	3.79	2.91	5.88	5.89	3.89	3.92	3.29
TR76263|c0_g1_i1	6.25	5.57	4.32	2.84	5.95	4.42	7.15
TR76785|c2_g1_i2	6.59	5.91	3.84	3.21	5.63	3.49	6.16
TR76785|c2_g1_i3	5.43	4.01	1.57	3.1	4.46	3.2	4.35
TR76785|c2_g1_i4	5.6	5.67	2.61	4.3	4.85	3.01	6.21
TR65313|c0_g1_i1	23.24	18.24	27.95	26.24	21.19	24.86	17.45
TR59707|c0_g1_i2	2.14	1.62	6.59	6.39	2.06	14.22	3.26
TR60217|c0_g1_i2	2.88	2.26	8.54	8.12	2.91	14.65	3.34
TR56899|c0_g1_i1	3.15	2.36	18.94	20.21	2.53	20.4	5
TR77325|c3_g1_i2	8.32	6.96	10.48	9.45	10.11	11.62	8.94
Mj_1_GCCAAT_L005_R1_001_(paired)_trimmed_(paired)_contig_10265	45.79	42.69	189.9	196.39	94.83	141.42	59.63
TR70786|c1_g1_i1	70.96	60.52	313.05	295.25	153.31	222.76	97.52
TR74341|c0_g1_i1	2.31	2.95	5.67	4.13	3.59	4.09	2.99
TR75554|c1_g2_i1	1.04	2.38	8.85	2.77	0	11.02	1.65
TR76749|c0_g1_i3	6.4	5.24	4.09	3.9	5.78	2.09	5.27
TR72242|c2_g1_i1	4.02	1.75	6.3	4.58	4.37	8.31	3.29
TR62831|c0_g1_i1	4.49	6.72	23.72	13.77	9.12	34.4	2.16
TR71148|c0_g1_i3	5.91	5.25	8.49	7.61	6.69	9.75	6.64
TR71864|c0_g7_i5	4.74	3.37	6.07	3.69	3.75	6.31	5.06
TR78024|c0_g1_i1	10.22	8.57	28.39	16.85	10.72	19.76	13.51
TR76764|c0_g1_i1	158.3	177.48	514.59	257.9	305.14	359.65	208.35
TR76764|c0_g1_i3	51.85	46.43	245.29	123.58	146.17	155.39	96.49
TR79137|c0_g1_i7	4.04	3.98	6.9	6.62	4.87	6.22	4.11
TR75517|c0_g1_i1	4.28	6.42	7.22	7.82	7.28	10.67	6.95
TR76773|c0_g1_i3	12.98	13.04	18.83	16.41	14.67	20.99	13.96
TR57985|c0_g1_i5	5.03	4.8	8.26	7.25	6.31	8.07	6.12
TR60897|c0_g1_i1	20.97	26.06	13.12	12.45	20.62	1.26	31.96
TR60897|c1_g1_i3	10.62	13.17	5.19	10.52	19.23	1.67	14.54
TR71486|c0_g1_i1	9.8	8.97	16.5	10.76	15.59	16.73	11.79
C958830	4.15	3.03	6.13	3.68	4.49	7.52	4.86
TR66284|c0_g2_i2	10.03	13.8	20.05	11.15	22.71	19.52	10.62
Mj_1_GCCAAT_L005_R1_001_(paired)_trimmed_(paired)_contig_29130	2.98	3.04	5.01	4.63	3.41	5.14	4.28
TR57591|c2_g1_i2	5.29	4.29	9.06	9.67	6.23	8.36	5.85
TR58789|c0_g1_i5	7.3	5.32	13.72	7.41	5.48	11.23	5.12
Mj_1_GCCAAT_L005_R1_001_(paired)_trimmed_(paired)_contig_7504	6.02	6.65	9.53	11.42	11.01	15.31	9.37
TR60925|c5_g1_i1	2.86	3.14	4.11	3.48	3.58	5.42	3.36
Mj_1_GCCAAT_L005_R1_001_(paired)_trimmed_(paired)_contig_8390	9.66	8.41	15.5	10.94	12.12	12.22	9.18
TR71064|c1_g1_i5	2.57	3.65	4.33	3.14	4.32	6.36	3.39
scaffold13879	3.09	2.62	5.65	7.61	4.87	9.32	4.05
TR71150|c1_g1_i7	10.7	10.9	18.65	15.35	15.55	17.63	10.53
TR72566|c3_g1_i2	16.44	17.06	25.64	20.61	19.78	26.23	18.46
TR72566|c3_g1_i5	15.04	14.01	20.09	19.83	17.12	25.15	16.78
scaffold11057	4.46	6.15	6.93	6.04	5.7	8.04	5.53
scaffold11058	9.87	8.4	16.37	14.64	15.38	18.42	10.64
Mj_1_GCCAAT_L005_R1_001_(paired)_trimmed_(paired)_contig_6220	3.12	2.64	6.69	4.42	6.35	6.96	4.11
scaffold13761	5.87	4.8	7.23	7.34	7.17	8.94	5.91
TR78392|c1_g1_i2	1.92	1.5	5.75	4.7	4.17	4.26	2.92
TR73427|c1_g2_i9	5.99	4.44	11.3	10.29	7.99	7.84	6.85
Mj_1_GCCAAT_L005_R1_001_(paired)_trimmed_(paired)_contig_19109	7.62	6.16	22.67	15.39	13.73	21.68	14.5
scaffold10400	4.17	4.58	13.3	10.03	7.18	5	5.92
TR70833|c0_g1_i2	3.09	2.62	5.39	3.09	2.91	5.09	4.29
TR60145|c0_g1_i2	6.1	6.14	11.62	8.28	10.22	11.03	7.15
TR77697|c0_g2_i11	2.64	2.51	7.45	9.18	6.75	17.4	3.31
Mj_1_GCCAAT_L005_R1_001_(paired)_trimmed_(paired)_contig_18150	9.03	7.55	30.74	29.66	23.6	49.89	7.31
TR77697|c0_g2_i1	20.04	15.71	48.52	55.57	38.41	99.84	15.58
TR54099|c0_g1_i1	5.53	5.48	9.54	5.64	10.91	10.72	6.03
TR72502|c1_g1_i2	7.28	4.79	8.57	7.47	8.94	14.42	5.99
TR67606|c0_g1_i2	13.65	12.68	21.02	18.37	17.45	22.34	14.31
TR62431|c0_g1_i1	11.39	10.21	13.83	8.74	10.39	13.91	12.61
TR60155|c0_g1_i1	3.3	4.4	10.54	7.06	8.06	11.59	6.18
TR60155|c0_g1_i3	1.89	3	8.16	6.09	6.38	10.06	4.94
TR60155|c0_g1_i4	1.87	2.51	6.99	4.73	5.21	7.79	3.26
TR60155|c0_g1_i5	1.84	1.8	6.48	2.93	3.39	6.44	4.1
TR60234|c0_g1_i1	2.64	1.4	6.14	7.25	3.53	14.82	2.69
TR67051|c0_g1_i2	2.72	0.69	4.68	6.23	2.89	13.01	1.83
Mj_1_GCCAAT_L005_R1_001_(paired)_trimmed_(paired)_contig_8109	0.98	2.55	4.88	2.37	0.63	7.83	2.3
TR77799|c0_g1_i1	0.76	2.55	5.37	2.49	0.78	8.14	2.22
TR77799|c0_g1_i2	1.15	2.55	6.62	2.65	1.25	10.12	3.91
TR78201|c0_g1_i1	1.79	3.28	6.55	3.51	1.19	9.2	3.04
TR78201|c0_g1_i7	1.06	2.04	5.06	2.44	0.58	8.53	2.59
TR75600|c0_g1_i1	4.54	7.23	15.84	14.14	14.07	21.64	9.94
TR75668|c0_g1_i1	10.83	14.83	24.76	20.58	16.84	22.33	15.41
TR63082|c1_g2_i3	16.26	18.49	61.73	34.65	49.07	45.31	30.61
TR63082|c1_g2_i5	10.99	9.94	31.21	20.72	22.92	21.81	15.1
TR61554|c0_g1_i4	4.77	6.75	11.38	9.35	10.54	13.97	5.3
TR61554|c0_g1_i5	3.54	3.37	7.58	6.22	9.64	10.25	4.61
TR61818|c0_g1_i3	7.05	8.51	17.41	13.14	15.35	18.68	9.26
TR79440|c2_g1_i11	9.35	8.39	5.74	5.25	10.47	9.28	11.9
TR67359|c2_g1_i12	4.73	6.99	11	11.08	9.85	15.58	6.48
TR71771|c2_g1_i1	7.4	9.92	15.87	24.37	10.22	21.8	8.78
TR77119|c0_g1_i2	3.9	2.92	5.07	3.29	2.52	4.76	3.73
TR59340|c0_g1_i1	39.75	55.46	205.07	172.18	57.73	173.98	68.68
Mj_1_GCCAAT_L005_R1_001_(paired)_trimmed_(paired)_contig_12198	17.88	15	5.58	5.2	10.89	1.01	16.53
TR61511|c0_g1_i1	27.03	27.56	34.42	33.84	33.14	43.71	31.48
TR64648|c0_g1_i2	2.03	1.95	4.44	1.83	3.01	5.75	3.13
TR69180|c0_g1_i1	5.25	5.14	8.21	8.18	6.57	6.4	7.53
TR45355|c0_g1_i1	1.95	0.83	4.08	1.37	1.94	6.47	2.99
TR59040|c2_g1_i1	109.1	134.85	203.88	202.32	121.51	144.02	96.01
C966308	5.55	4.01	12.74	11.41	13.3	17.94	8.75
Mj_1_GCCAAT_L005_R1_001_(paired)_trimmed_(paired)_contig_15033	4.33	2.11	10.12	9.13	12.3	16.12	7.51
TR62387|c1_g1_i1	2.31	1.58	5.25	3.67	4.69	8.62	3.75
Mj_1_GCCAAT_L005_R1_001_(paired)_trimmed_(paired)_contig_24360	4.38	4.04	12.8	8.75	0.42	8.47	2.65
TR61235|c0_g1_i2	4.51	3.46	6.81	5.06	5.62	7.15	5.67
TR60436|c0_g1_i2	4.06	4.41	9.56	7.26	6.74	8.9	5.21
TR65162|c0_g1_i1	13.51	12.68	24.44	19.6	22.78	38.93	19.41
TR75970|c1_g1_i6	3.03	2.91	7.14	3.89	5.3	6.7	4.2
TR75970|c1_g1_i7	2.94	2.84	7.91	4.76	6.64	7.29	6.22
Mj_1_GCCAAT_L005_R1_001_(paired)_trimmed_(paired)_contig_20823	5.49	6.61	15.08	8.27	10.98	16.62	9.22
TR54023|c0_g1_i1	14.8	16.42	37.14	24.32	24.68	33.61	23.17
TR70419|c0_g1_i8	7.98	3.09	0.89	3.01	7.08	2.1	4.3
TR44660|c0_g1_i1	0.2	0.39	10.8	4.52	3.34	5.87	2.01
scaffold13883	0.24	0.4	20.12	8.88	4.9	14.82	3.36
Mj_1_GCCAAT_L005_R1_001_(paired)_trimmed_(paired)_contig_8628	4.19	4.12	6.81	5.82	4.73	4.44	4.68
TR54541|c0_g1_i1	7.38	9.55	0.38	2.81	4.57	1.79	11.25
TR55097|c0_g1_i1	11.69	11.67	0.85	3.46	6.29	1.62	13.86
TR55097|c0_g1_i2	9.59	9.71	1.06	2.31	5.39	2	12.2
TR71383|c2_g3_i3	1.78	2.77	3.92	5.11	4.38	6.7	3.7
TR60847|c1_g1_i1	0.99	1.9	4.48	2.88	2.72	6.6	3.75
TR56181|c0_g1_i3	6.33	5.29	10.16	10.36	8.26	9.24	6.49
scaffold12693	4.36	4.2	5.94	5.87	4.85	4.81	4.59
TR63073|c0_g1_i1	4.66	4.47	10.06	9.88	6.55	13.46	8.96
Mj_1_GCCAAT_L005_R1_001_(paired)_trimmed_(paired)_contig_49595	3.36	2.96	17.33	15.19	4.25	23.26	3.82
TR70683|c1_g1_i5	1.47	1.79	3.03	3.39	3.82	5.13	3.09
TR60580|c0_g1_i4	2.25	1.76	4.83	5.58	4.37	5.31	1.63
TR63940|c0_g1_i1	9.37	6.35	18.49	10.31	9.01	12.86	9.59
TR60447|c0_g2_i1	18.64	18.15	38.35	28.21	23.72	20.15	20.81
TR67433|c0_g1_i1	6.46	7.93	21.62	16.65	15.61	18.66	14.62
scaffold11930	5.49	5.16	19.9	14.32	13.39	13.37	11.77
scaffold13952	7.59	4.88	16.83	12.51	13.31	12.96	9.78
TR72136|c0_g1_i1	4.34	8.03	13.85	14.48	14.9	24.55	9.4
TR67283|c0_g1_i2	5.26	4.86	7.93	7.63	5.3	6.52	5.62
Mj_1_GCCAAT_L005_R1_001_(paired)_trimmed_(paired)_contig_10573	2.79	2.9	4.93	2.58	4.85	5.92	2.75
TR76176|c0_g3_i11	4.78	3.35	6.26	4.95	4.22	5.8	3.84
TR60330|c0_g1_i3	15.79	22.74	8.42	11.38	10.87	8.17	15.04
TR76918|c0_g1_i2	18.03	18.12	24.55	23.31	21.49	29.85	22.51
TR70652|c1_g1_i2	4.15	5	17.84	7.58	6.15	29.2	4.92
TR65935|c0_g1_i2	3.7	4.13	8.96	8.14	4.29	3.87	3.44
TR57677|c0_g1_i4	3.2	2.79	7.98	5.61	6.58	7.33	4.64
TR59449|c0_g1_i1	3.98	2.6	10.67	6	6.5	4.97	5.2
Mj_1_GCCAAT_L005_R1_001_(paired)_trimmed_(paired)_contig_14733	10.02	9.79	20.74	18.42	13.86	17.89	13.73
TR75176|c2_g1_i5	11.51	12.76	21.12	18.87	14.23	19.2	15.99
TR65809|c0_g1_i1	29.12	32.94	55.26	54.01	34.84	48.64	45.14
TR57696|c0_g1_i4	6.38	7.36	16.17	12.43	11.05	13	6.3
TR59628|c0_g1_i2	5.06	2.8	25.76	18.38	15.75	34.83	14.84
TR59628|c0_g1_i3	3.17	1.73	11.12	8.7	8.03	20.11	7.6
TR59628|c0_g1_i5	2.97	1.53	12.97	9.96	7.63	20.1	9
TR75017|c0_g1_i4	7.4	5.71	8.57	8.79	7.89	10.16	7.78
TR77153|c1_g4_i1	13.55	11.18	26.13	17.74	18.76	15.2	15.73
TR64653|c0_g1_i1	27.74	21.61	43.16	34.78	31.69	50.48	24.39
scaffold10769	17.93	12.67	30.65	27.31	19.32	34.12	19.51
TR76777|c2_g1_i1	5.34	5.73	10.19	9.62	13.41	13.88	9.03
TR77291|c0_g3_i3	3.45	6.84	14.71	9.84	9.82	9.29	8.52
TR79221|c1_g3_i3	7.58	5.71	11.63	6.85	9.83	11.9	9.04
TR60825|c0_g1_i2	5.83	3.57	7.04	4.49	6.91	7.45	5.08
scaffold14250	3.33	4.1	30.66	13.61	14	10.57	4.38
TR69526|c0_g1_i1	1.03	1.6	8.62	9.34	8.49	26.08	3.66
TR54723|c0_g2_i1	23.6	22.02	66.46	55.1	48.6	61.73	45.41
Mj_1_GCCAAT_L005_R1_001_(paired)_trimmed_(paired)_contig_14456	3.31	4.41	6.57	4.82	3.74	9.49	3.45
TR62034|c0_g1_i1	15.45	9.3	27.65	18.14	29.79	37.38	27.11
TR74197|c1_g1_i1	2.8	3.24	7.37	4.36	3.65	5.63	4.21
scaffold13691	6.9	6.27	5.64	6.44	7.38	5.48	6.33
TR59124|c1_g1_i3	7.17	8.76	23.7	20.99	23.36	25.04	16.14
Mj_1_GCCAAT_L005_R1_001_(paired)_trimmed_(paired)_contig_16239	2.86	3.22	19.44	14.7	16.86	21.3	1.66
TR66936|c0_g1_i4	4.03	6.86	11.3	4.43	5.76	9.3	1.52
scaffold1093	1.77	1.52	8.66	5.92	6.25	7.21	1.49
TR74999|c0_g2_i1	15.41	11.49	19.33	22.84	13.4	18.2	13.33
TR72173|c0_g3_i3	3.4	4.14	8.45	7.51	6.51	9.04	5.41
TR62108|c0_g1_i1	47.29	70.65	102.3	67.4	72.9	82.84	63.18
TR73876|c0_g1_i3	6.58	6.43	15.71	15.7	10.99	18.75	10.82
TR35223|c0_g1_i1	8.34	6.83	12.43	12.42	9.15	19.26	8.39
TR74947|c1_g1_i6	3.34	2.24	6.25	4.52	4.44	6.32	4.76
Mj_1_GCCAAT_L005_R1_001_(paired)_trimmed_(paired)_contig_5570	13.81	11.51	24.14	16.65	16.9	24.03	16.7
TR67168|c0_g1_i1	9.57	7.48	11.21	10.1	10.39	11.52	8.64
Mj_1_GCCAAT_L005_R1_001_(paired)_trimmed_(paired)_contig_3242	10.26	10.44	19.75	18.41	17.26	18.94	11.36
Mj_1_GCCAAT_L005_R1_001_(paired)_trimmed_(paired)_contig_1295	29.18	25.9	62.24	42.17	40.99	42.74	36.73
TR69503|c0_g1_i2	5.15	4.68	10.51	8.2	10.57	12.49	8.3
TR69503|c0_g1_i3	4.91	3.87	8.47	7.01	8.64	10.66	6.53
TR76610|c0_g1_i1	0.7	1.37	7.63	9.9	8.24	13.12	5.71
C936132	2.1	2.51	9.69	7.5	1.05	13.59	1.04
TR55102|c1_g1_i4	1.4	0.67	7.11	5.35	0.42	8.11	1.52
TR68490|c1_g1_i1	11.73	9.13	15.45	17.18	11.45	21.35	12.87
TR64215|c0_g1_i1	6.13	7.63	19.13	17.11	15.14	12.04	9.7
TR64215|c0_g1_i2	5.58	7.82	17.18	18.66	15.5	13.46	9.65
Mj_1_GCCAAT_L005_R1_001_(paired)_trimmed_(paired)_contig_2487	11.55	8.51	16.67	12.38	13.53	13.27	10.94
TR69907|c1_g1_i1	11.45	9.42	15.93	15.12	10.62	11.49	10.25
TR69907|c1_g1_i2	8.11	8.08	13.4	12.7	10.88	10.77	9.08
Mj_1_GCCAAT_L005_R1_001_(paired)_trimmed_(paired)_contig_9560	3.27	3.81	7.49	4.42	5.64	5.09	3.87
TR74831|c1_g1_i1	7.73	6.51	14.9	12.25	7.75	6.73	8.42
TR74831|c1_g1_i2	3.04	2.6	8.44	6.1	6.67	4.88	3.54
TR74831|c1_g1_i4	2.5	1.57	5.89	5.44	3.42	4.38	2.75
TR74831|c1_g1_i6	4.03	3.93	8.95	10.17	5.3	5.87	5
TR56605|c1_g1_i3	4.04	3.19	7	3.76	6.02	12.09	6.79
Mj_1_GCCAAT_L005_R1_001_(paired)_trimmed_(paired)_contig_12546	6.59	5.39	4.83	4.33	3.91	2.9	4.91
TR60950|c1_g1_i1	5.59	6.9	9.14	6.67	8.12	11.38	8.71
TR43682|c0_g1_i1	7.02	6.91	9.58	9.04	11.19	13.52	8.69
TR49998|c0_g1_i1	6.45	7.49	11.08	9.35	4	12.16	9.25
Mj_1_GCCAAT_L005_R1_001_(paired)_trimmed_(paired)_contig_16749	9.17	10.76	19.19	14.24	14.21	15.73	11.81
Mj_1_GCCAAT_L005_R1_001_(paired)_trimmed_(paired)_contig_835	13.16	3.55	39.85	30.04	9.99	21.64	15.35
TR75856|c1_g1_i3	4.91	5.38	23.64	17.74	10.84	42.05	4.55
scaffold10091	1.97	2.9	8.21	6.74	4.08	15.15	1.79
TR71968|c0_g1_i2	3.06	3.19	5.4	3.54	4.3	4.13	3.22
TR55582|c0_g1_i1	46.08	37.66	130.89	110.33	84.96	116.2	39.67
Mj_1_GCCAAT_L005_R1_001_(paired)_trimmed_(paired)_contig_2442	33.72	31.82	64.29	49.74	43.77	52.28	41.6
TR52552|c0_g1_i1	63.43	55.44	121.17	83.59	82.76	92.59	71.82
Mj_1_GCCAAT_L005_R1_001_(paired)_trimmed_(paired)_contig_3754	38.07	34.85	86.74	68.34	37.2	55.24	44.74
TR74342|c0_g4_i2	19.04	15.94	24.71	23.33	12.78	19.08	17.12
TR68591|c0_g1_i2	7.05	5.41	19.78	18.91	9.87	49.22	8.27
TR56565|c1_g6_i3	43.46	39.19	53.11	54.84	49.18	61.98	45.68
Mj_1_GCCAAT_L005_R1_001_(paired)_trimmed_(paired)_contig_2473	5.22	7.59	10.18	7.5	6.34	9.57	6.36
TR73143|c2_g1_i1	5.57	8.29	16.97	12.32	10.58	13.55	7.55
TR56118|c0_g1_i1	28.64	41.52	21.18	38.14	32.84	20.72	24.95
TR69075|c0_g1_i1	23.67	25.31	47.56	42.67	27.33	46.24	33.26
TR63486|c0_g1_i2	8.93	9.42	12.35	12.06	5.94	13.07	6.37
TR65090|c0_g1_i2	2.39	5	6.66	7.58	2.27	4.33	2.57
Mj_1_GCCAAT_L005_R1_001_(paired)_trimmed_(paired)_contig_6349	31.02	19.49	56.56	55.48	35.66	72.73	38.44
TR72076|c4_g1_i4	25.36	14.39	39.58	44.37	31.53	61.87	27.11
scaffold10688	8.68	12	18.64	15.19	16.26	19.44	11.61
TR53043|c0_g1_i1	19.18	29.36	8.35	9.42	10.02	0.21	17.38
TR50029|c0_g1_i1	30.6	24.22	56.26	52.61	34.84	41.99	31.81
TR50029|c0_g1_i2	15.39	11.27	25.59	23.57	18.38	22.95	14.2
TR52338|c1_g2_i1	18.37	15.99	34.09	32.14	27.07	26.46	19.86
TR52338|c1_g3_i1	16.02	11.38	29.73	26.71	20.35	22.29	18.92
Mj_1_GCCAAT_L005_R1_001_(paired)_trimmed_(paired)_contig_15460	1.37	0.39	4.02	3.69	1.23	6.38	1.08
TR40443|c0_g1_i1	1.91	1.17	8.19	5.63	3.06	13.34	2.56
TR68016|c0_g1_i1	22.97	24.09	49.41	51.43	36.61	70.27	32.49
TR68092|c0_g1_i3	2.93	2.65	5.39	3.04	4.46	5.22	3.43
TR77867|c0_g1_i2	6.15	4.46	11.49	7.74	8.11	10.72	7.84
TR78771|c1_g4_i3	7.14	5.66	14.19	8.82	9.02	14.61	10.74
TR67051|c1_g1_i5	0.72	0.26	3.81	4.01	5.95	7.93	3.2
Mj_1_GCCAAT_L005_R1_001_(paired)_trimmed_(paired)_contig_1645	97.23	64.55	172.27	224.13	113.9	193.99	107.77
TR60183|c1_g1_i1	93.66	69.29	203.29	232.63	132.33	208.18	113.68
TR60004|c0_g1_i3	12.38	11.01	19.84	22.03	13.93	17.33	10.94
TR61717|c0_g1_i1	23.31	15.91	37.61	35.77	23.32	30.55	27.4
Mj_1_GCCAAT_L005_R1_001_(paired)_trimmed_(paired)_contig_19397	6.61	7.74	21.23	21.97	20.08	31.42	17.57
TR65587|c0_g1_i1	7.33	8.67	20.07	20.02	18.76	28.46	17.07
TR61696|c0_g1_i7	2.37	3.4	4.81	3.35	3.95	6.3	4.29
TR53630|c0_g1_i1	94.33	59.45	186.12	115.78	133.35	109.28	72.3
Mj_1_GCCAAT_L005_R1_001_(paired)_trimmed_(paired)_contig_1571	21.78	19.71	28.26	33.68	27.47	27.62	24.09
TR66057|c0_g1_i2	23.85	18.67	39.76	37.03	24.26	31.2	29.83
TR66057|c1_g1_i5	16.54	12.96	31.68	27.43	17.19	22.78	21.78
TR74296|c0_g1_i3	5.04	5.8	3.73	3.88	5.61	5.25	4.58
TR52318|c0_g1_i1	19.77	20.29	61.54	62.97	56.63	109.64	24.15
TR66919|c6_g1_i1	4.87	3	46.36	31.04	11.03	58.7	3.59
scaffold10045	0.8	0.15	6.42	3.56	0.72	5.87	0.16
scaffold10046	2.45	1.05	21.31	14.68	4.7	25.46	1.5
TR79242|c2_g12_i4	4.25	5.02	2.88	3.38	4.84	4.17	4.71
Mj_1_GCCAAT_L005_R1_001_(paired)_trimmed_(paired)_contig_20444	3.73	5.34	10.53	3.84	3.61	8.67	5.5
TR73601|c0_g1_i1	5.39	6.9	11.84	6.98	6.69	11.45	7.59
TR79540|c0_g1_i1	2.92	3.04	5.03	4.4	4.72	7	3.42
Mj_1_GCCAAT_L005_R1_001_(paired)_trimmed_(paired)_contig_1094	15.74	14.93	26.57	22.91	18.74	28.7	18.27
TR67809|c0_g1_i2	17.67	15.55	33.02	26.78	20.61	33.69	20.2
TR67809|c0_g1_i3	14.47	11.69	24.34	16.75	16	21.09	16.32
TR68617|c0_g1_i2	18.51	17.3	27.84	21.92	19.52	27.56	19.62
TR54800|c0_g1_i1	2.35	4.71	159.09	26.74	0.32	113.77	8.21
TR73530|c0_g1_i5	3.17	2.58	5.71	4.9	4.62	6.13	3.69
TR46748|c0_g1_i1	1.8	2.87	18.74	12.4	7.41	30.18	5.92
TR46748|c0_g1_i2	1.7	2.52	25	15	5.79	40.08	7.33
TR76969|c0_g1_i1	9.67	10.74	18.32	18.27	17.24	23.13	13.74
scaffold10809	7.97	8.89	14.75	14.48	12.58	19.44	11.57
TR68696|c2_g3_i1	38.71	37.35	63.81	46.11	51.47	55.2	45.59
Mj_1_GCCAAT_L005_R1_001_(paired)_trimmed_(paired)_contig_5162	12.13	10.88	16.19	14.54	13.43	19.81	11.12
TR76272|c0_g1_i2	7.41	9.13	17.13	11.51	11.93	18.32	8.3
TR58977|c0_g1_i1	11.93	9.72	5.83	9.79	6.29	6.57	8.83
TR62485|c1_g4_i1	0	0	11.68	2.52	0.3	15.16	1.17
TR75825|c0_g1_i11	2.37	2.04	3.07	3.86	3.71	5.1	3.04
TR67229|c0_g1_i1	9.71	8.58	20.46	14.94	21.27	22	17.08
TR67229|c0_g2_i1	10.31	9.19	17.78	14.02	16.41	19.33	12.5
Mj_1_GCCAAT_L005_R1_001_(paired)_trimmed_(paired)_contig_15256	1.63	1.68	9.93	4.07	3.74	7.38	4.11
TR79103|c0_g1_i1	1.71	1.86	8.96	4.85	4.92	8.79	4.18
TR68607|c0_g1_i2	3.98	3.52	5.23	4.43	4.46	5.22	3.71
TR70134|c0_g1_i1	11.69	10.77	16.22	16.93	14.99	27.74	11.89
TR70134|c0_g1_i2	11.13	11.66	16.16	16.91	13.88	26.43	11.72
TR61073|c0_g1_i4	5.15	4.91	10.35	5.3	7.27	6.64	4.19
TR56166|c0_g1_i1	32.17	28.97	92.8	77.08	79.25	67.44	44.92
Mj_1_GCCAAT_L005_R1_001_(paired)_trimmed_(paired)_contig_7292	3.88	8.68	12.32	5.09	3.2	10.9	8.42
Mj_1_GCCAAT_L005_R1_001_(paired)_trimmed_(paired)_contig_1993	9.77	14.4	6.02	11.39	11.28	6.99	6.87
TR65223|c1_g1_i3	3.99	3.19	5.74	4.94	6.38	6.97	4.78
TR68171|c0_g4_i1	33.87	27.86	39.5	28.32	33.64	45.17	35.36
TR60176|c0_g1_i1	8.23	7.18	14.59	16.14	12.74	14.29	8.82
TR59898|c0_g1_i5	2.4	3.42	5.47	4.06	4.61	6.43	4.44
TR72781|c0_g1_i5	8.66	10.17	15.07	15.59	14.09	22.89	14.15
TR75998|c0_g1_i1	21.51	20.31	46.68	34.11	31.76	40.66	31.1
scaffold14434	10.71	10.47	25.97	21.28	18.55	21.08	15.61
scaffold14435	8.64	8.21	24.41	17.23	16.72	18.25	14.49
TR66975|c2_g1_i1	6.15	6.42	0	4.22	7.55	2.07	2.1
TR59655|c0_g1_i1	1.33	2.75	3.38	0.7	1.32	5.13	1.74
TR59655|c0_g1_i2	2.53	5.94	10.76	5.32	2.01	9.2	2.57
TR65726|c1_g1_i2	3.94	6.07	10.48	4.62	3.09	11.79	4.63
TR71355|c0_g1_i2	6.87	6.77	9.14	5.32	7.71	11.28	8.32
TR76504|c0_g1_i3	11.08	13.21	15.02	12.55	10.47	14.75	13.79
TR65603|c0_g1_i1	26.31	26.36	47.48	35.07	20.3	38.42	22.69
TR74167|c0_g1_i3	1.97	2.22	3.62	3.43	3.29	5.78	3.37
TR52923|c0_g1_i1	1.83	1.96	8.88	2.91	5.99	3.43	0.68
Mj_1_GCCAAT_L005_R1_001_(paired)_trimmed_(paired)_contig_4544	9.52	7.34	10.62	6.89	7.98	12.04	5.93
TR57704|c0_g1_i3	1.46	2.46	7.14	3.6	4.37	4.15	2.24
TR78216|c1_g1_i3	2.89	2.25	4.87	4.33	4.05	6.62	3.82
TR78216|c1_g1_i5	2.88	1.65	5.52	3.9	4.01	6.75	4.2
TR49565|c0_g1_i1	20.65	17.01	45.06	27.02	32.55	26.33	24.94
TR61556|c0_g1_i1	11.63	12.02	17.46	18.98	12.26	21.18	12.46
TR54667|c0_g1_i1	11.27	10.6	21	19.45	17.77	15.85	12.62
scaffold12268	7.62	12.52	2.3	5.26	4.66	3.03	7.5
Mj_1_GCCAAT_L005_R1_001_(paired)_trimmed_(paired)_contig_10144	12.61	10.82	18.15	15.24	16.55	18.55	12.55
C937864	0	0.16	4.39	2.95	0	8.45	1.34
TR62988|c0_g1_i3	5.81	5.09	2.69	4.01	4.75	0.82	4.66
TR62988|c0_g1_i5	5.99	7.22	3.73	3.21	3.86	0.67	4.63
TR55876|c0_g1_i2	4.64	3.75	11.97	8.48	9.06	6.53	6.15
TR60029|c0_g3_i3	5.15	5.79	3.11	2.31	5.53	2.49	4.04
TR73330|c0_g1_i1	1.06	2.37	6.45	1.96	2.38	4.7	1.57
TR73330|c0_g1_i2	3.37	5.81	11.64	6.52	4.28	9.48	5.53
TR73330|c0_g1_i5	3.12	5.12	10.23	5.44	3.47	9.82	4.13
TR67937|c0_g1_i1	17.11	16.49	22.34	23.84	19.67	19.6	18.15
TR75131|c2_g1_i7	6.29	5.79	4.24	3.55	5.88	5.53	4.36
TR74138|c0_g1_i1	38.89	31.53	43.18	43.66	31.29	41.22	35.6
scaffold14551	27.08	22.39	30.88	31.04	22.56	29.02	25.03
TR60699|c0_g1_i3	4.23	3.19	5.86	3.49	3.35	5.31	3.73
TR56009|c0_g1_i1	9.08	8.89	19.64	17.96	15.97	22.42	11.14
TR68548|c0_g1_i1	4	3.58	6.95	6.46	5.97	9.41	4.69
TR68548|c0_g1_i2	3.76	3.04	6.05	6.04	6.07	8.03	4.24
scaffold10591	12.69	7.94	22.6	21.16	15.38	39.4	11.67
TR64363|c1_g1_i1	49.31	46.56	116.77	89.12	75.99	89.81	61.17
TR75270|c0_g1_i2	5.61	6.51	9.35	8.12	10.4	12.67	8.16
TR75270|c0_g1_i3	5.18	6.23	9.96	8.18	10.58	12.9	8.95
TR75270|c0_g1_i5	4.3	5.39	6.5	5.37	6.46	8.48	6.02
TR66628|c0_g1_i7	7.48	6.94	11.39	8.23	7.19	14.94	6.15
TR54449|c0_g1_i1	35.12	31.23	91.93	55.69	61.99	69.44	40.72
Mj_1_GCCAAT_L005_R1_001_(paired)_trimmed_(paired)_contig_47317	3.83	4.15	16.31	11.09	6.2	11.94	9.53
Mj_1_GCCAAT_L005_R1_001_(paired)_trimmed_(paired)_contig_9841	2.67	1.17	7.96	7.99	5.23	6.28	4.15
TR76611|c0_g1_i1	6.26	4.85	10.21	9.9	7.17	7.98	8.77
TR75656|c0_g1_i3	3.82	5.04	7.83	7.38	6.96	9.62	5.59
TR75656|c0_g1_i6	4.78	5.59	8.81	7.47	7.12	11.15	6.13
scaffold11331	5.61	4.24	7.27	7.6	5.05	10.57	5.96
scaffold11333	3.92	4.6	6.77	4.98	5.61	7.91	3.92
TR61229|c0_g1_i4	4.19	3.15	5.74	5.43	4.7	7.04	4.82
TR65581|c0_g1_i2	1.12	4.67	15.5	23.55	5.81	26.27	3.23
TR73550|c0_g1_i2	4.98	3.65	7.62	5.26	5.7	11.04	5.56
TR74724|c0_g6_i1	4.34	4.89	8.55	6.41	5.46	8.27	5.79
Mj_1_GCCAAT_L005_R1_001_(paired)_trimmed_(paired)_contig_11019	3.43	4.6	8.07	7.22	7.73	10.39	6.3
TR71279|c0_g3_i3	11.26	12.78	22.71	19.2	24.38	24.82	17.87
TR73485|c0_g1_i2	2.88	2.99	5.89	5.13	7.33	8.35	4.18
TR76154|c1_g1_i3	8.72	13.93	3.97	5.84	6.01	2.47	10.24
TR76154|c1_g1_i4	6.9	9.06	3.05	4.26	5.78	2.36	8.7
TR75384|c0_g1_i1	3.48	3.54	5.76	5.03	4.38	4.83	4.4
TR74034|c1_g2_i5	7.7	9.75	13.59	9.27	8.57	11.62	6.3
TR52035|c1_g1_i1	8.75	14.56	4.46	5.52	14.71	8.67	11.17
Mj_1_GCCAAT_L005_R1_001_(paired)_trimmed_(paired)_contig_9668	6.56	4.12	10.08	6.16	5.78	14.29	8.67
TR79262|c0_g1_i1	7.22	5.02	12.35	7.09	7.66	16.18	10.6
TR79589|c0_g2_i1	7.2	5.59	11.08	6.88	7.36	14.5	10.12
scaffold11767	1.34	2.29	3.08	3.04	4.14	5.6	3.28
TR73823|c0_g1_i3	10.84	7.78	13.53	12.52	17.17	19.33	12.5
TR63986|c0_g1_i1	26.53	18.15	7.58	9.47	26.28	14.46	13
TR64343|c0_g1_i1	12.14	7.11	2.03	5.8	9.31	2.07	8.53
TR69573|c2_g1_i1	2.51	2.33	4.21	3.88	4.05	5.31	3.15
Mj_1_GCCAAT_L005_R1_001_(paired)_trimmed_(paired)_contig_22875	7.64	9.01	4.81	6.2	6.9	3.94	8.58
TR79605|c1_g2_i2	6.8	7.06	3.58	4.52	3.78	3.08	5.6
TR56288|c0_g1_i1	21	11.06	43.73	37.68	25.13	26.63	24.31
TR74340|c1_g3_i4	1.17	1.95	2.76	3.26	3.81	5.33	2.99
scaffold13604	2.23	2.72	5.8	5.32	5.98	9.35	5.5
Mj_1_GCCAAT_L005_R1_001_(paired)_trimmed_(paired)_contig_10079	7.79	7.37	3.64	4.09	6.26	1.87	8.97
TR61098|c0_g1_i2	10.04	12.09	5.03	4.71	9.09	3.04	11.14
TR73549|c1_g1_i2	9.31	9.45	4.27	5.14	6.89	4.66	10.8
TR72159|c0_g1_i4	4.39	5.54	1.7	2.9	2.57	0.96	3.28
TR72025|c0_g1_i1	14.13	11.93	20.68	22.3	19.44	33.05	14.45
TR72025|c0_g1_i2	4.77	2.41	11.82	7.53	11.19	16.89	6.17
TR79763|c1_g2_i1	21.57	22.98	28.51	28.53	22.56	21.31	20.81
TR59434|c0_g1_i3	4.85	3.95	2.52	1.81	3.63	4.28	5.35
TR78516|c3_g2_i3	4.69	4.13	7.07	4.76	8.68	8.94	5.55
TR61909|c0_g2_i1	24.18	19.76	39.2	31.56	28.38	28.34	29.92
TR76802|c1_g2_i3	8.35	5.28	12.16	7.01	11.97	12.61	9.38
TR76802|c1_g2_i5	7.61	5.46	11	7.29	10.85	15.32	8.09
scaffold12091	5.73	3.84	8.08	6.72	6.72	8.08	5.67
TR77056|c0_g1_i1	2.6	1.21	3.79	0.86	0.81	5.41	1.2
TR74302|c1_g5_i3	8.84	7.11	4.5	2.86	6.89	1.56	7.52
Mj_1_GCCAAT_L005_R1_001_(paired)_trimmed_(paired)_contig_5780	5.51	4.79	8.21	5.16	6.69	9.31	6.17
TR64009|c0_g1_i1	3.06	3.54	6.87	4.76	3.94	7.4	4.69
TR63936|c0_g1_i2	5.19	3.3	7.68	7.82	6.97	10.79	6.83
TR55317|c0_g2_i1	0.93	1.01	5.45	5.46	2.97	10.57	1.17
Mj_1_GCCAAT_L005_R1_001_(paired)_trimmed_(paired)_contig_9172	1.96	1.79	7.13	6.66	5.25	8.37	4.55
TR72167|c0_g2_i3	4.16	2.69	14.48	6.98	5	10.15	5.42
TR72167|c0_g2_i6	3.12	1.81	8.44	4.51	5.28	7.08	4.49
scaffold11897	4.7	2.42	12.77	4.87	3.24	8.81	5.16
TR69962|c2_g1_i2	3.2	2.65	8.71	5.38	4.36	7.53	5.56
TR76279|c3_g1_i4	4.32	2.42	5.67	4.77	5.5	6.99	3.78
Mj_1_GCCAAT_L005_R1_001_(paired)_trimmed_(paired)_contig_3843	9.87	10.54	3.5	4.48	5.19	3.7	8.97
TR77677|c0_g3_i4	1.74	1.03	3.75	3.35	4.78	6.43	2.14
TR70571|c1_g1_i6	5.48	3.51	2.89	3.61	5.25	3.05	4.2
TR49337|c0_g1_i5	4.88	4.9	8.92	3.47	6.35	9.85	6.46
TR78051|c0_g2_i1	5.01	4.91	1.6	3.76	3.23	3.43	5.02
Mj_1_GCCAAT_L005_R1_001_(paired)_trimmed_(paired)_contig_16497	10.74	9.3	15.85	17.79	9.9	17.65	10.08
TR69413|c0_g1_i1	30.65	31.99	68.91	52.16	31.46	60.8	34.16
TR65170|c0_g1_i6	5.12	2.86	10.81	7.9	6.36	6.09	4.24
TR65170|c1_g1_i8	3.56	2.77	7.53	5.21	6.11	4.62	3.52
Mj_1_GCCAAT_L005_R1_001_(paired)_trimmed_(paired)_contig_269	21.4	26.61	6.61	20.1	21.92	11.94	19.32
TR57916|c0_g1_i1	20.49	25.28	6.88	17.94	23.85	11.67	17.51
TR76066|c0_g5_i1	6.67	8.15	13.81	14.56	13.01	11.19	8.15
TR72587|c3_g1_i2	5.61	7.21	72.87	27.14	42.99	31.98	10.27
scaffold14299	2.29	3.34	46.93	14	25.93	19.08	6
TR77315|c0_g2_i2	5.9	4.41	9.06	7.24	8.47	10.45	8.25
TR78085|c0_g4_i2	2.02	12	14.75	8.8	4.32	25.42	4.84
TR78085|c0_g4_i3	1.52	10.8	14.07	7.51	5.6	29.1	3.16
Mj_1_GCCAAT_L005_R1_001_(paired)_trimmed_(paired)_contig_1389	7.1	7.02	19.65	5.85	12.59	21.91	4.15
TR75013|c0_g1_i1	14.46	16.75	38.66	18.17	25	38.26	9.03
TR75408|c0_g1_i4	10.39	12.83	35.45	11.17	21.21	28.07	6.94
TR75408|c0_g1_i5	3.89	4.73	15.69	6.72	12.43	17.07	3.27
Mj_1_GCCAAT_L005_R1_001_(paired)_trimmed_(paired)_contig_10615	3.87	4.56	10.19	8.18	6.76	12.04	4.45
TR69182|c0_g1_i3	4.89	5.94	12.36	11.41	8.42	11.63	5.12
Mj_1_GCCAAT_L005_R1_001_(paired)_trimmed_(paired)_contig_11477	4.32	2.91	7.27	4.13	4.49	9.48	5.64
TR73356|c3_g1_i1	7.46	6.11	11.73	9.81	10.81	15.26	9.15
TR73356|c3_g1_i2	3.13	3.27	4.69	2.86	3.64	7.05	3.86
scaffold13001	3.77	2.15	4.55	4.21	3.83	5.74	3.87
TR79791|c2_g1_i3	3.09	3.39	4.76	3.58	4.51	6.19	4.74
TR73349|c0_g2_i4	4.78	3.55	5.52	5.33	4.45	7.24	3.68
TR70796|c0_g1_i3	5.27	5.3	6.7	5.51	6.42	9.33	4.48
TR58024|c0_g1_i2	27.4	24.97	16	12.37	22.66	14.76	25.42
Mj_1_GCCAAT_L005_R1_001_(paired)_trimmed_(paired)_contig_6768	10.2	5.25	16.69	16.87	16.82	23.95	13.69
TR77077|c0_g3_i2	3.95	3.33	6.78	5.23	4.33	5.2	4.47
TR66880|c0_g1_i1	6.59	6.57	9.42	7.62	8.24	8.13	6.67
TR67277|c1_g2_i2	6.74	7.19	17.86	20.46	18.92	26.27	15.87
TR71724|c0_g1_i3	5.85	4.31	8.28	6.66	5.75	9.94	6.13
TR72479|c2_g1_i3	8.29	6.13	9.93	8.13	7.28	12.19	8.86
Mj_1_GCCAAT_L005_R1_001_(paired)_trimmed_(paired)_contig_8549	12.94	5.62	61.9	39.51	28.24	58.3	37.81
TR38429|c0_g1_i1	21.77	7.44	91.53	51.78	41.63	73.29	55.24
TR53028|c0_g2_i1	0.18	0.17	18.46	23.66	0.27	20.23	1.18
TR70816|c0_g1_i1	7	6.83	15.47	7.79	10.48	16.58	8.56
TR70816|c0_g1_i2	6.88	7.56	16.24	10.28	12.83	17.48	8.73
TR46516|c0_g1_i1	41.22	31.56	56.96	54.58	35.17	41.53	46.51
TR55903|c0_g1_i1	71.89	55.89	162.52	92.45	108.81	160.39	75.07
Mj_1_GCCAAT_L005_R1_001_(paired)_trimmed_(paired)_contig_29643	2.54	1.56	18.54	9.75	12.22	3.83	2.66
TR64323|c1_g1_i1	2.54	0.66	18.73	12.77	13.04	6.37	2.27
TR76011|c0_g1_i4	13.37	14.75	28.7	25.25	14.63	27.03	18.54
TR76612|c1_g1_i2	22.14	26.27	44.74	40.35	24.05	40.92	30.03
TR62682|c0_g4_i2	7.05	6.14	8.73	6.38	6.91	9.1	8.21
TR67732|c2_g1_i2	5.03	4.55	8.26	5.89	6.73	5.88	3.39
TR67732|c2_g1_i7	8.91	8.02	16.18	16.18	12.96	13.87	6.66
TR67402|c0_g1_i1	55.08	41.76	94.56	82.74	69	77.01	57.59
TR70892|c2_g1_i2	5.65	5.92	9.25	8.32	6.19	7.5	6.52
TR63346|c1_g1_i3	2.52	3.46	4.61	4.65	5.41	6.38	4.31
TR63346|c1_g1_i4	3	2.89	4.22	4.6	4.28	6.32	4.32
Mj_1_GCCAAT_L005_R1_001_(paired)_trimmed_(paired)_contig_19255	8.02	7.54	14.31	7.15	13.11	13.52	8.28
Mj_1_GCCAAT_L005_R1_001_(paired)_trimmed_(paired)_contig_1715	13.96	12.8	21.26	23.36	16.36	22	14.43
TR63388|c0_g1_i1	14.42	13.71	22.22	19.7	19.17	20.26	16.85
TR73409|c0_g1_i2	5.16	3.71	6.51	6.91	4.68	7.42	4.57
TR65980|c0_g1_i1	37.16	36.57	78.38	53.2	54.55	55.78	45.29
Mj_1_GCCAAT_L005_R1_001_(paired)_trimmed_(paired)_contig_7022	16.29	14.08	22.74	24.26	15.98	27.78	15.75
TR77341|c0_g1_i1	20.16	15.23	31.08	28.6	19.47	31.47	18.47
TR61241|c0_g2_i1	2.04	2.39	6.68	5.38	1.35	5.52	1.12
TR73647|c0_g2_i4	5.91	4.64	8.41	9.34	9.27	11.08	7.88
TR73647|c0_g2_i6	3.8	2.3	5.55	3.66	5.34	6.4	4.2
TR65241|c0_g1_i1	5.87	5.38	10.11	6.54	5.77	9.65	9.85
Mj_1_GCCAAT_L005_R1_001_(paired)_trimmed_(paired)_contig_5740	9.73	10.87	44.17	34.65	35.32	74.75	23.01
TR64860|c0_g1_i2	6.14	6.38	29.17	26.11	21.03	49.66	14.17
Mj_1_GCCAAT_L005_R1_001_(paired)_trimmed_(paired)_contig_6842	4.67	7.91	9.93	4.48	4.67	9.88	5.5
Mj_1_GCCAAT_L005_R1_001_(paired)_trimmed_(paired)_contig_4883	31.26	27.53	51.01	54.48	43.41	77.94	40.97
TR69332|c0_g1_i7	2.83	2.32	5.22	3.98	3.92	3.65	2.63
Mj_1_GCCAAT_L005_R1_001_(paired)_trimmed_(paired)_contig_6821	70.7	80.88	170.99	150.4	53.4	125.73	79.7
TR66480|c0_g1_i1	82.27	97.5	204.06	179.97	62.35	146.08	100.34
TR65534|c1_g1_i3	157.65	201.47	494.52	592.44	177.42	496.68	198.49
TR72343|c1_g2_i3	102.28	122.94	319.57	377.69	118.23	296.64	126.9
TR73207|c2_g1_i1	10.61	13.2	16.39	11.63	10.81	14.9	13.19
TR73207|c2_g1_i2	7.69	9.94	11.33	8.45	8.34	10.97	9.71
TR79037|c2_g1_i3	3.35	5.86	1.97	2.79	4.91	0.51	6.69
TR53364|c0_g1_i1	5.68	5.65	17.3	20.74	25.82	29.97	15.26
TR60121|c0_g1_i2	6.25	4.32	11.74	11.61	10.5	15.85	9.48
Mj_1_GCCAAT_L005_R1_001_(paired)_trimmed_(paired)_contig_3585	15.41	11.82	20.82	21.1	19.25	27.31	14.37
Mj_1_GCCAAT_L005_R1_001_(paired)_trimmed_(paired)_contig_21233	1.91	3.12	9.58	4.81	5.58	10.5	5.18
TR57717|c1_g1_i1	7.06	11.92	36.92	17.66	24.1	34.76	23.3
TR69548|c0_g1_i5	0.89	1.09	4.04	5.25	5.14	9.19	3.14
Mj_1_GCCAAT_L005_R1_001_(paired)_trimmed_(paired)_contig_16687	2.58	2.91	7.77	5.64	2.89	7.64	2.25
Mj_1_GCCAAT_L005_R1_001_(paired)_trimmed_(paired)_contig_1977	76.12	61.72	95.12	108.61	65.05	95.62	66.61
TR67978|c1_g1_i1	88.1	69.67	105.58	116.65	70.57	99.55	71.1
TR67978|c2_g1_i3	39.6	27.2	61.32	51.01	40.76	59.01	35.29
TR65814|c0_g1_i1	47.19	30.22	110.43	92.05	104.88	154.97	62.57
TR72142|c2_g1_i1	63.32	63.76	128.18	113.24	121.42	138.55	98.01
TR50563|c0_g1_i4	3.65	5.37	1.18	1.87	2.03	0.72	3.2
Mj_1_GCCAAT_L005_R1_001_(paired)_trimmed_(paired)_contig_15669	1.5	1.54	7.88	6.24	5.02	10.92	3.53
TR75566|c1_g1_i2	1.78	1	4.76	5.66	3.52	6.84	2.16
TR75721|c0_g1_i1	1.67	1.5	8.8	7.67	3.83	13.03	3.3
TR75721|c0_g1_i3	2.48	1.57	8.36	9.17	7.14	13.72	4.31
scaffold13950	5.56	5	10.4	8.05	8.07	9.26	4.03
TR58979|c0_g1_i1	12.79	21.87	39.55	64.2	60.33	99.58	46.98
TR72657|c0_g1_i7	7.42	6.94	11.7	11.7	8.42	15.97	10.59
TR73871|c0_g1_i2	6.3	6.71	9.86	10.17	7.85	15.14	10.2
TR73871|c0_g1_i7	5.64	7.2	9.29	10.4	8.62	14.05	9.91
Mj_1_GCCAAT_L005_R1_001_(paired)_trimmed_(paired)_contig_6775	15.16	11.96	18.9	16.32	13.19	24.45	15.79
TR71192|c0_g1_i2	20.74	16.76	23.48	22.1	19.62	32.24	19.63
TR66534|c0_g1_i1	0.97	2.35	32.34	17.43	20.59	15.12	9.18
scaffold10460	0.76	1.09	16.11	9.21	10.25	8.34	5.5
scaffold10413	3.88	3.71	6.63	5.54	6.37	6.88	5.16
TR72235|c1_g1_i2	1.16	0.61	4.51	2.5	2.01	7.12	0.57
Mj_1_GCCAAT_L005_R1_001_(paired)_trimmed_(paired)_contig_3787	48.19	53.72	85.74	99.58	62.73	88.71	59.8
TR72979|c1_g1_i1	70.38	76.07	133.13	133.12	80.37	124.33	88.41
C973034	1.59	1.67	3.2	4.67	4.34	6.4	3.31
TR63017|c0_g1_i1	1.36	1.42	4.39	5.19	7.44	9.01	3.82
TR63017|c0_g1_i2	1.81	1.65	4.64	4.37	6.73	7.61	3.04
TR47394|c0_g1_i1	3.39	5.34	60.01	55.6	1.77	107.42	4.34
TR47394|c0_g1_i2	2.29	1.8	32.31	31.63	1.21	56.36	3.45
TR76749|c0_g1_i10	7.21	5.27	2.65	3.85	5.39	1.07	4.61
TR76749|c0_g1_i2	6.16	4.91	1.96	2.22	4.93	0.6	3.64
TR76749|c0_g1_i8	5.41	5.22	3.32	4.17	5.35	1.9	4.62
TR72946|c1_g1_i3	2.41	2.42	4.78	4.03	3.04	5.5	3.13
TR54535|c0_g1_i1	5.17	3.13	16.01	5.15	4.44	12.3	5.08
TR54535|c1_g1_i1	2.74	1.6	6.44	3.14	3.64	9.28	4.05
TR74321|c0_g1_i2	3.78	3.69	9.01	5.7	7.56	11.11	6.51
C972558	2.43	2.52	4	4.58	4.52	5.97	3.67
TR75953|c0_g5_i4	1.86	1.85	3.29	4.2	3.15	5.19	2.3
TR72613|c0_g1_i7	4	2.37	6.27	4.52	2.84	6.11	4.5
TR79610|c1_g1_i4	5.57	6.55	8.17	7.29	7.42	9.11	7.74
TR79698|c0_g1_i3	6.74	6.42	9.45	8.04	8.69	12.11	8.83
TR63856|c1_g2_i5	3.55	3.47	4.43	3.6	4.04	5.88	4.3
Mj_1_GCCAAT_L005_R1_001_(paired)_trimmed_(paired)_contig_6804	7.32	4.93	13.36	9.82	10.01	7.29	8.09
TR57901|c0_g1_i2	7.9	5.72	16.11	10.55	10.89	9.02	9.36
TR68978|c0_g1_i3	3.1	3.03	5.24	4.58	4.18	5.04	3.56
TR52807|c0_g1_i1	21.2	19.32	35.32	28.99	29.94	27.02	23.15
TR67462|c0_g1_i1	6.55	6.6	11.32	7.98	9.44	10.67	10
TR66402|c0_g1_i2	8.42	8.7	12.67	10.41	10.34	17.7	11.09
TR66402|c0_g1_i4	13.18	14.44	23.67	15.98	19.22	30.72	22.33
TR66402|c0_g1_i5	7.99	7.49	15.58	9.03	12.54	18.9	12.2
TR74474|c0_g1_i5	2.89	2.89	4.85	4.36	4.75	6.06	4.49
TR49356|c0_g1_i1	8.33	6.42	58.48	25.05	36.49	26.93	19.88
TR77492|c0_g6_i1	11.64	11.89	19.52	19.59	16.26	16.73	12.54
Mj_1_GCCAAT_L005_R1_001_(paired)_trimmed_(paired)_contig_11336	5.44	3.75	11.53	9.99	12.32	17.09	9.85
TR56179|c0_g1_i1	4.83	5.44	18.75	12.4	16.63	21.39	12.04
TR77639|c0_g1_i3	11.47	11.41	14.03	9.1	9.06	21.87	12.69
Mj_1_GCCAAT_L005_R1_001_(paired)_trimmed_(paired)_contig_806	7.47	7.13	9.14	8.52	7.25	10.54	8.13
Mj_1_GCCAAT_L005_R1_001_(paired)_trimmed_(paired)_contig_3765	3.67	3.29	5.76	3.18	1.17	10.52	1.32
Mj_1_GCCAAT_L005_R1_001_(paired)_trimmed_(paired)_contig_567	16.27	12.66	21.14	24.27	16.14	25.63	15.8
TR51615|c0_g1_i1	18.5	14.74	37.9	37.47	14.16	25.72	22.84
TR71785|c0_g1_i3	19.75	12.93	35.22	34.18	13.48	27.95	20.53
TR70589|c0_g1_i1	4.7	4.93	7.94	5.06	5.56	8.98	5.42
TR70589|c0_g1_i2	3.74	2.74	10.61	5.04	6.33	9.19	5.21
TR73099|c1_g1_i1	5.6	5.82	12.57	8.38	7.77	10.47	8.32
TR73099|c1_g1_i2	5.55	5.08	8.66	6.23	6.13	10.64	6.8
TR73099|c1_g1_i3	3.65	3.81	5.73	4.61	3.9	7.15	4.87
TR69938|c0_g1_i1	3.42	3.12	6.47	6.48	5.25	5.41	3.52
Mj_1_GCCAAT_L005_R1_001_(paired)_trimmed_(paired)_contig_7549	2.75	2.66	5.41	6.37	4.07	7.39	4
TR61910|c0_g1_i4	31.17	32.74	54.69	32.94	32.96	60.9	32.96
TR58044|c0_g1_i1	1.96	1.89	7.27	5.76	2.92	3.09	2.76
scaffold13696	4.46	3.81	4.93	5.5	3.82	4.66	4.49
TR64055|c0_g1_i1	35.13	22.37	43.94	47.35	43.73	61.73	36.23
TR78153|c0_g3_i2	6.02	6.15	7.67	5.95	4.61	7.96	5.01
Mj_1_GCCAAT_L005_R1_001_(paired)_trimmed_(paired)_contig_4748	24.77	23.67	46.14	40.11	38.7	37.62	32.6
TR65714|c0_g1_i1	18.69	15.76	29.95	24.13	19.81	24.08	21.26
TR67395|c0_g1_i1	24.99	24.87	49.76	39.66	36.94	39.74	33.19
scaffold120	14.71	14.22	26.35	25.54	19.88	22.49	18.72
TR59199|c0_g1_i1	24.68	23.42	50.95	41.41	31.08	34.24	27.23
Mj_1_GCCAAT_L005_R1_001_(paired)_trimmed_(paired)_contig_17845	17.28	16.11	51.86	25.45	31.4	25.35	17.42
Mj_1_GCCAAT_L005_R1_001_(paired)_trimmed_(paired)_contig_17412	3.57	2.28	6.61	7.02	3.81	5.29	3.69
scaffold13393	3.21	3.8	6.51	7.39	2.82	6.89	4.26
TR65300|c4_g1_i1	4.24	2.83	7.15	6.57	8.61	10.55	7.25
TR56762|c0_g1_i2	9.33	11.19	21.7	17.1	11.51	35.89	14.51
TR56762|c0_g1_i3	11.9	11.93	21.01	19.1	15.64	37.93	14.86
TR78744|c0_g2_i8	6.6	4.47	8.64	6.87	4.86	7.91	7.95
TR71250|c0_g1_i2	2.49	3.45	5.76	3.26	2.4	4.87	4.1
TR63638|c1_g1_i2	7.85	7.17	9.15	9.44	10.1	10.99	8.95
Mj_1_GCCAAT_L005_R1_001_(paired)_trimmed_(paired)_contig_2755	2.66	2.96	6.51	8.02	6.38	11.29	6.37
scaffold10903	1.42	1.38	2.78	3.62	3.65	5.63	2.96
TR64593|c0_g2_i1	7.17	7.58	4.49	4.36	7.07	5.76	6.47
TR54699|c0_g2_i1	22.13	15.1	35.2	27.43	33.63	38.62	24.8
TR60557|c0_g1_i2	5.9	4.94	7.31	5.26	5.08	8.68	7.23
TR60557|c1_g1_i1	5.21	5.03	10.39	6.75	8.04	6.98	5.84
Mj_1_GCCAAT_L005_R1_001_(paired)_trimmed_(paired)_contig_18483	28.45	33.46	41.39	41.97	35.58	37.25	34.34
TR68920|c0_g1_i4	11.83	7.35	14.26	10.14	14.74	16.52	12.35
TR63710|c0_g1_i2	5.28	3.89	2.02	4.63	4.31	2.18	2.38
TR77548|c0_g1_i1	18.16	20.99	7.68	7.43	18.04	6.93	13.85
Mj_1_GCCAAT_L005_R1_001_(paired)_trimmed_(paired)_contig_13587	3.97	4.4	8.85	7.01	6.68	6.81	6.08
TR68653|c0_g1_i1	5.91	7.35	12.21	8.88	9.4	8.35	7.94
TR68653|c0_g1_i2	2.85	2.95	6.44	4.72	5.52	5.55	3.75
TR70147|c0_g1_i2	2.67	2.2	4.96	5.2	6.6	7.88	5.04
TR67316|c0_g1_i2	4.15	3.84	5.9	6.71	7.19	8.3	5.87
TR68238|c0_g2_i1	8.09	6.86	11.48	8.62	8.51	9.93	9.68
TR77311|c2_g5_i3	0.4	0	5.71	0.96	0.3	4.7	0.4
TR74897|c2_g1_i4	2.66	4.04	6.56	8.74	2.25	7.14	4.44
TR72149|c0_g1_i1	18.78	21.58	53.26	26.11	30.94	43.93	26.67
TR74251|c1_g1_i2	26.41	32.21	66.62	35.22	39.17	62.07	36.03
TR79462|c3_g1_i5	3.99	5.03	9.18	6.61	9.48	10.05	5.54
TR79462|c3_g2_i9	2.5	1.75	3.33	2.9	2.98	5.54	2.62
TR57543|c0_g1_i1	0.24	0.54	5.57	1.43	0.74	4	0.32
Mj_1_GCCAAT_L005_R1_001_(paired)_trimmed_(paired)_contig_12557	7.1	8.39	3.93	2.31	6.22	4.62	7.81
TR79464|c1_g1_i7	6.55	6.29	9.47	6.32	9.16	8.85	8.46
Mj_1_GCCAAT_L005_R1_001_(paired)_trimmed_(paired)_contig_37608	4.26	5.5	13.53	10.45	7.3	6.59	6.71
Mj_1_GCCAAT_L005_R1_001_(paired)_trimmed_(paired)_contig_7012	23.99	25.76	18.86	15.26	12.66	8.97	18.33
TR56121|c0_g1_i3	4.75	4.78	8.38	9	7.89	11.13	7.02
Mj_1_GCCAAT_L005_R1_001_(paired)_trimmed_(paired)_contig_11876	1.9	2.79	4.14	3.03	2.02	5.09	2.73
Mj_1_GCCAAT_L005_R1_001_(paired)_trimmed_(paired)_contig_20922	6.22	5.16	13.29	5.97	9.29	8.35	5.32
TR60386|c1_g1_i5	3.84	4.35	6.67	5.24	5.95	6.05	4.94
TR61131|c0_g1_i1	13.3	10.41	28.45	16.7	19.58	15.27	15.6
Mj_1_GCCAAT_L005_R1_001_(paired)_trimmed_(paired)_contig_505	70.27	64.59	179.72	156.97	34.12	118.34	48.77
TR66386|c0_g1_i1	80.47	75.86	193.35	176.03	36.78	135.13	56.08
Mj_1_GCCAAT_L005_R1_001_(paired)_trimmed_(paired)_contig_1090	107.04	89.34	123	141.53	116.79	150.64	107.57
TR69865|c0_g1_i1	9.18	8.15	15.91	9.11	11.64	18.42	11.32
Mj_1_GCCAAT_L005_R1_001_(paired)_trimmed_(paired)_contig_32257	3.92	2.62	10.39	4.84	6.47	8.52	5.03
TR69161|c0_g1_i1	4.68	2.79	14.52	10.08	17.39	21.58	10.82
TR69161|c0_g1_i5	4.02	2.78	11.84	7.38	12.29	12.77	7.99
TR69161|c0_g1_i6	5.48	3.39	16.94	10.71	17.59	18.21	10.93
TR69718|c0_g1_i5	5.69	4.64	17.47	13.29	18.96	19.93	11.75
scaffold13984	3.38	3.14	10.42	8.33	11.35	11.84	7.63
Mj_1_GCCAAT_L005_R1_001_(paired)_trimmed_(paired)_contig_4018	16.86	22.89	58.2	63.01	22.15	40.23	31.51
TR68783|c0_g1_i1	19.99	27.14	66.68	67.75	28.34	45.34	37.78
C932162	1.71	4.71	18.52	9.01	8.48	8.82	7.84
Mj_1_GCCAAT_L005_R1_001_(paired)_trimmed_(paired)_contig_13313	4.47	7.93	25.28	15.43	15.69	12.93	11.1
TR60151|c0_g1_i2	1.45	1.94	5.98	4.61	2.61	4.52	1.86
TR73170|c6_g2_i4	7.1	8.88	26.04	14.21	16.92	15.58	12.05
C968596	5.22	4.44	0.51	6.16	5.9	0.68	3.82
TR48463|c0_g1_i1	5.15	5.48	0.43	5.89	6.47	0.61	3
TR63045|c0_g1_i1	11.51	7.03	17.62	11.02	15.89	18.33	11.11
TR63045|c0_g1_i2	9.47	5.77	17.12	9.07	12.45	13.23	9.34
TR53493|c0_g1_i1	4.26	3.93	11.81	7.64	8.43	10.99	5.56
TR71524|c0_g1_i1	28.08	24.58	49.15	50.29	44.45	57.66	35.87
TR58879|c0_g1_i1	3.2	2.29	6.41	6.88	5.65	10.53	6.17
Mj_1_GCCAAT_L005_R1_001_(paired)_trimmed_(paired)_contig_3876	7.32	6.19	18.2	15.94	14.14	13.26	8.27
TR54621|c1_g1_i1	13.31	13.75	30.71	22.4	24.87	26.06	13.3
TR54621|c1_g1_i2	9.53	9.99	24.88	18.49	17.88	16.26	10.07
TR56329|c0_g2_i1	8.11	6.57	16.7	13.26	10.86	11.55	6.63
TR56329|c0_g2_i2	6.1	6.59	16.84	12.67	10.41	13.91	7.1
TR67438|c0_g1_i1	27.98	22.1	48.44	43.3	36.15	37.95	24.25
scaffold13893	24.33	18.12	38.25	29.74	28.42	32.08	20.79
TR73767|c0_g1_i1	3.24	3.47	5.39	4.23	2.56	8.45	1.13
TR73767|c0_g1_i2	3.58	5.31	5.27	3.12	4.01	8.93	4.23
TR62458|c0_g1_i1	14.19	16.06	8.02	9.06	10.05	8.37	12.17
Mj_1_GCCAAT_L005_R1_001_(paired)_trimmed_(paired)_contig_10553	14.71	13.53	18.99	17.43	17.64	21.91	12.32
TR75905|c1_g1_i6	6.78	6.98	7.65	4.11	4.04	16.06	5.54
Mj_1_GCCAAT_L005_R1_001_(paired)_trimmed_(paired)_contig_23567	20.44	24.48	68.24	48.67	41.05	42.17	37.45
TR67899|c3_g2_i1	14.17	10.59	20.19	15.34	13.87	21.49	14.85
TR69698|c0_g2_i1	3.69	5.3	12.08	14.62	11.32	19.3	9.9
TR65976|c0_g1_i2	0.6	0.91	7.89	5.71	2.69	1.2	1.89
scaffold13083	3.31	3.79	8.58	7.23	6.26	7.52	5.03
Mj_1_GCCAAT_L005_R1_001_(paired)_trimmed_(paired)_contig_17698	4.85	5.92	8.31	5.24	5.26	8.54	6.51
TR53279|c0_g2_i1	102.73	91.12	250.96	172.52	193.52	172.31	139.57
TR76572|c1_g2_i1	12.58	10.84	16.63	13.39	13.36	17.01	12.37
Mj_1_GCCAAT_L005_R1_001_(paired)_trimmed_(paired)_contig_6076	21.75	17.74	28.88	20.14	22.25	38.5	23.57
TR75510|c0_g1_i1	18.02	16.85	27.25	17.54	21.45	29.72	19.71
TR67981|c1_g1_i2	9.61	6.97	21.89	27.42	14.56	20.66	6.11
TR68597|c4_g1_i1	16.17	10.71	32.4	36.22	23.09	31.89	9.55
TR57583|c0_g1_i1	23.32	39.74	146.49	133.46	75.08	151.19	102.93
TR30726|c0_g1_i1	0.16	0.77	4	5.13	2.17	7	0
TR66716|c0_g1_i5	8.6	11.68	2.17	7.77	11.55	2.02	1.72
scaffold10215	11.6	9.59	21.4	19.4	16.11	15.21	17.1
Mj_1_GCCAAT_L005_R1_001_(paired)_trimmed_(paired)_contig_6348	4.68	4.54	5.45	4.56	4.15	5.37	5.08
TR72736|c0_g1_i4	4.02	4.09	5.53	3.95	3.94	5.93	4.01
TR75192|c1_g2_i1	3.98	3.22	6.05	4.76	3.74	6.82	4.2
TR71236|c0_g2_i6	4.24	3.99	6.02	5.71	3.77	5.31	4.65
TR77318|c0_g1_i1	6.86	6.39	7.45	5.73	6.45	8.05	5.6
TR60069|c0_g1_i1	13.14	11.54	21.6	25.79	30.91	33.57	19.7
TR63507|c0_g1_i1	0.76	0.76	3.77	3.45	2.71	5.41	1.03
TR69024|c0_g1_i1	26.65	52.6	10.77	24.75	13.83	4.87	35.33
Mj_1_GCCAAT_L005_R1_001_(paired)_trimmed_(paired)_contig_14455	4.89	4.87	6.61	6.23	5.36	8.81	5.36
TR58708|c0_g1_i1	15.87	11.41	34.27	32.68	27.74	42.93	24.61
TR55614|c0_g1_i1	3.96	1.41	5.08	3.04	3.08	6.31	2.45
Mj_1_GCCAAT_L005_R1_001_(paired)_trimmed_(paired)_contig_699	327.82	248.22	442.47	410.69	248.57	332.39	291.38
TR79039|c0_g6_i7	165.77	135.22	207.77	193.92	126.09	158.12	162.66
TR79065|c1_g3_i1	410.07	317.78	627.54	656.81	398.21	536	371.56
TR79039|c0_g6_i13	214.26	165.28	343.65	409.23	242.78	314.32	166.43
Mj_1_GCCAAT_L005_R1_001_(paired)_trimmed_(paired)_contig_29094	2.03	1.2	6.52	5.7	2.42	2.03	2.98
TR75781|c0_g1_i1	2.22	1.4	4.03	4.26	3.74	5.68	1.49
Mj_1_GCCAAT_L005_R1_001_(paired)_trimmed_(paired)_contig_435	37.26	27.9	49.53	49.08	31.53	44.45	33.41
TR52568|c0_g1_i1	9.29	6.38	12.97	10.9	8.33	12.37	8.61
Mj_1_GCCAAT_L005_R1_001_(paired)_trimmed_(paired)_contig_43801	2.64	2.57	6.5	2.99	7.77	7.8	5.17
TR52752|c0_g2_i2	5.78	7.18	2.79	1.31	4.79	0.34	7.95
TR71840|c0_g1_i1	14.9	10.66	7.32	4.85	12.36	6.21	9.73
TR74484|c0_g1_i1	17.91	14.4	21.83	21.93	20.01	25.7	19.13
TR75699|c0_g1_i6	4.89	4.6	6.13	4.15	5.11	6.11	5.83
Mj_1_GCCAAT_L005_R1_001_(paired)_trimmed_(paired)_contig_15598	4.06	4.22	9.47	7.9	5.08	7.04	3.71
TR63662|c0_g1_i2	3.14	2.78	5.98	5.67	2.43	5.66	2.45
TR64660|c0_g2_i1	9.08	7.53	13.92	12.71	6.4	12.73	7.34
Mj_1_GCCAAT_L005_R1_001_(paired)_trimmed_(paired)_contig_6176	37.64	44.52	48.82	51.24	27.38	50.51	36.1
TR76722|c2_g2_i4	1.75	3.02	4.9	2.01	1.73	5.01	4.17
TR62516|c0_g1_i3	5.8	4.91	13.07	7.76	9.25	8.07	7.64
Mj_1_GCCAAT_L005_R1_001_(paired)_trimmed_(paired)_contig_7829	11.13	11.78	18.78	13.96	11.56	22.6	9.48
TR54333|c1_g1_i1	13.07	14.4	21.47	14.27	12.88	23.86	13.46
TR71801|c2_g1_i5	6.24	5.62	4.08	5.15	5.02	4.89	5.36
Mj_1_GCCAAT_L005_R1_001_(paired)_trimmed_(paired)_contig_10015	47.27	43.29	15.06	38.4	48.92	16.98	12.64
TR78060|c2_g1_i3	11.96	8.37	16.64	12.11	15.36	18.37	14.77
TR71873|c0_g1_i6	0.8	1.73	3.31	2.22	3.89	5.55	2.37
TR76109|c1_g2_i5	8.49	7.63	13.84	10.66	8.39	11.54	7.62
TR76109|c1_g2_i6	6.57	5.36	9.1	6.74	6.63	8.56	8
TR61380|c0_g1_i1	3.43	3.46	7.99	4.79	5.57	5.23	4.22
TR40381|c1_g1_i1	6.32	6.41	2.8	3	4.31	4.02	5.59
TR71435|c0_g1_i3	5.22	4.77	2.87	2.77	3.77	3.26	4.2
Mj_1_GCCAAT_L005_R1_001_(paired)_trimmed_(paired)_contig_20435	3.43	0.39	11.88	13.74	1.5	12.06	2.58
TR47169|c0_g1_i1	3.99	1.9	22.87	19.45	1.99	17.6	4.59
TR47169|c0_g1_i2	1.64	0.26	5.46	3.88	0	3.91	1.88
Mj_1_GCCAAT_L005_R1_001_(paired)_trimmed_(paired)_contig_1384	4.11	5.18	7.57	6.83	6.61	9.24	5.55
TR77078|c3_g1_i1	5.47	5.7	7.73	8.02	6.67	9.77	7.09
TR77078|c3_g1_i2	4.33	5.92	8.43	6.62	6.46	9.28	6.55
scaffold13967	3.14	4.27	5.95	5.06	4.13	6.24	4.77
TR63250|c0_g1_i1	18.04	11.21	22.77	21.72	14.13	26.83	15.24
TR70724|c0_g3_i3	3.49	2.44	5.2	2.59	2.44	5.17	5.05
Mj_1_GCCAAT_L005_R1_001_(paired)_trimmed_(paired)_contig_4792	46.95	33.15	70.42	78.04	53.37	57.41	45.72
scaffold14002	40.12	24.49	62.7	59.48	42.49	42.28	36.73
TR66687|c1_g1_i10	2.55	1.47	3.9	1.61	3.03	7.59	3.76
TR61893|c0_g1_i1	3.65	1.81	6.54	4.18	2.94	6.14	6.56
Mj_1_GCCAAT_L005_R1_001_(paired)_trimmed_(paired)_contig_8114	3.05	3.8	15.58	7.08	10.53	16.55	3.24
TR73216|c0_g2_i2	6.75	9.46	38.51	16.82	30.87	33.23	11.49
TR73216|c0_g2_i3	4.61	4.8	21.72	7.31	16.75	18.87	4.34
TR73216|c1_g1_i1	6.28	4.3	17.19	7.58	18.38	23.65	7.13
TR73216|c1_g1_i3	14.1	10.2	61.96	25.88	50.47	62.63	15.48
TR67894|c0_g3_i2	9.16	8.32	30.5	23.19	21.66	23.8	7.23
TR67894|c0_g3_i4	9.4	8.88	27.72	21.93	20.49	23.07	8.71
TR75046|c1_g1_i1	12.94	12.99	25.82	17.87	14.76	20.74	19.27
TR75954|c0_g1_i1	10.14	10.98	10.94	12.52	9.5	11.97	11.09
TR60090|c0_g1_i1	10.08	6.67	18.9	12.15	15.83	18.16	10.42
TR60090|c1_g1_i2	5.57	3.49	8.53	6.65	8.36	9.96	4.99
TR65815|c0_g1_i1	49.02	36.3	62.05	48.2	50.02	69.65	54.63
TR66024|c0_g1_i3	3.46	2.36	5.76	5.62	2.94	3.28	4.71
Mj_1_GCCAAT_L005_R1_001_(paired)_trimmed_(paired)_contig_7553	10.92	9.02	16.24	20.52	19.58	27.3	15.06
TR76666|c0_g4_i1	12.35	11.22	20.09	18.45	24.37	33.3	18.85
scaffold11369	2.92	3.74	5.47	4.27	4.21	5.32	4.47
TR42709|c0_g1_i1	10.31	12.42	9.16	9.13	10.79	5.52	13.45
TR48740|c0_g1_i2	18.09	16.43	52.04	35.82	27.28	36.17	25.62
TR48740|c0_g1_i3	13.44	12.61	38.5	25.85	22.64	25.97	17.07
TR49653|c0_g1_i3	17.21	13.73	47	29.2	22.55	33.58	20.8
TR49502|c0_g1_i1	8.05	7.13	12.56	7.65	8.41	11.81	9.52
TR55140|c0_g1_i1	4.22	5.17	1.79	2.43	3.53	3.19	4.56
TR76936|c1_g3_i6	2.14	2.94	5.21	4.68	3.21	5.21	4.36
TR78349|c0_g1_i2	7.88	8.08	10.36	8.24	6.16	10.91	9.01
Mj_1_GCCAAT_L005_R1_001_(paired)_trimmed_(paired)_contig_26652	3.85	3.88	6.37	6.66	5.11	7.28	4.22
TR72031|c2_g1_i2	3.73	4.45	9.15	6.23	7.04	8.43	5.21
Mj_1_GCCAAT_L005_R1_001_(paired)_trimmed_(paired)_contig_15082	4.4	7.33	9.49	14.13	1.65	11.93	8.23
TR54234|c0_g1_i1	6.95	11.21	17.25	23.32	2.67	21.04	12.46
TR73118|c0_g1_i2	3.77	5.26	1.23	2.31	2.59	0.66	2.65
TR64782|c3_g1_i5	9.92	14.49	42.68	16.15	23.11	30.5	13.41
TR62868|c1_g1_i1	9.71	11.64	28.87	21.77	19.55	25.78	11.61
Mj_1_GCCAAT_L005_R1_001_(paired)_trimmed_(paired)_contig_10294	7.81	8.38	13.24	12.23	13.02	17.72	12.17
TR79601|c0_g2_i2	9.02	8.41	15.86	15.24	18.53	23.02	15.52
TR79601|c0_g2_i4	6.84	4.04	14.25	16.21	16.03	24.09	9.83
TR79652|c0_g3_i3	14.16	10.6	19.44	23.36	17.03	29.76	16.7
TR75314|c0_g1_i3	5.64	5.18	8.12	5.94	5.95	7.69	5.37
Mj_1_GCCAAT_L005_R1_001_(paired)_trimmed_(paired)_contig_908	3.77	4.72	6.94	6.43	2.4	8.46	4.95
TR74693|c1_g1_i2	2.94	3.43	4.24	6.2	1.1	4.83	4.21
TR74693|c2_g1_i2	3.93	4.03	9.14	7.06	2.57	6.62	4.18
TR67829|c2_g1_i1	4.19	1.26	5.24	4.55	3.89	7.51	2.32
TR54001|c0_g1_i1	13.16	11.94	20.26	17.48	16.49	13.28	14.39
TR67781|c0_g1_i3	0.94	1.87	3.49	1.5	1.41	5.88	1.32
TR68494|c0_g1_i3	1.63	2.15	3.83	1.26	1.26	5.81	1.51
TR71576|c1_g1_i1	4.42	6.06	1.77	3.96	3.65	3.84	5.02
TR71576|c1_g1_i3	4.58	6.24	1.77	3.98	3.71	3.94	5.22
TR67848|c1_g1_i2	2.7	2.84	5.96	4.64	4.48	7.11	4.45
TR67848|c1_g1_i5	4.22	4.08	6.27	6.12	8.44	8.66	5.99
TR70096|c4_g1_i7	4.15	2.99	5.75	5.11	5.52	6.86	4.96
scaffold11517	4.01	3.46	7.59	5.59	5.46	9.01	6.75
C968544	22.66	22.9	43.11	40.41	30.34	52.88	23.49
Mj_1_GCCAAT_L005_R1_001_(paired)_trimmed_(paired)_contig_1595	19.62	19.34	36.83	31.01	24.8	42.82	22
TR65147|c0_g1_i1	22.87	24.19	39.29	33.6	24.97	45.58	23.53
Mj_1_GCCAAT_L005_R1_001_(paired)_trimmed_(paired)_contig_13239	17.76	18.22	12.27	11.42	22.83	14.83	22.43
TR76446|c1_g1_i6	9.25	7.13	13.8	9.79	8.88	13.23	11.79
TR76511|c0_g1_i1	11.53	9.62	15.9	11.87	10.64	16.52	12.8
TR66495|c0_g1_i1	46.38	47.15	97.83	95.18	71.1	82.92	47.83
TR76770|c0_g1_i2	2.75	1.63	5.65	3.61	3.5	3.98	2.24
TR61881|c0_g1_i1	13.51	12.47	17.08	13.97	14.49	15.87	15.3
TR68856|c0_g1_i4	4.97	5.01	9.17	7.44	8.76	15.4	7.6
Mj_1_GCCAAT_L005_R1_001_(paired)_trimmed_(paired)_contig_20960	5.1	4.06	9.8	8.97	10.75	13.63	4.78
TR62119|c0_g1_i1	6.02	4.49	10.5	9.93	10.56	13.42	7.24
TR59751|c2_g2_i2	2.05	1.61	3.67	2.83	4.54	5.35	3.43
TR59751|c2_g2_i3	1.75	2.78	4.39	4.81	6.11	6.99	4.02
scaffold13817	14.36	12.91	19.8	18.57	12.97	25.48	12.89
TR72183|c0_g1_i1	2.63	1.84	5.36	2.78	5.23	5.44	4.14
TR62997|c0_g1_i1	7.88	5.75	10.58	8.79	10.19	16.6	8
TR78002|c1_g1_i5	4.61	3.38	5.61	3.66	3.22	5.12	4.09
C958672	3.98	4.71	9.02	6.33	5.53	7.24	5.27
TR67052|c0_g1_i1	3.94	3.33	7.55	6.73	4.38	5.37	4.25
TR69574|c0_g1_i3	4.88	4.47	7.54	6	4.67	8.24	5.94
TR70131|c0_g1_i1	3.8	3.58	6.94	5.49	4.14	6.54	4.93
TR76948|c0_g1_i10	6.22	4.69	7.36	5.14	4.79	7.34	4.8
TR60764|c0_g1_i1	22.55	19.81	38.73	36.99	33.44	40.73	28.46
TR71878|c4_g2_i7	4.82	5.41	3.78	4.26	5.14	3.46	4.87
Mj_1_GCCAAT_L005_R1_001_(paired)_trimmed_(paired)_contig_441	141.95	96.88	202.45	265.11	72.18	207.97	100.03
TR61931|c0_g1_i1	1.31	0.16	3.68	5.35	2.82	12	2.02
Mj_1_GCCAAT_L005_R1_001_(paired)_trimmed_(paired)_contig_15729	6.3	4.38	14.95	14.15	7.05	12.8	5.63
TR61590|c1_g3_i3	12.53	8.51	19.73	17.53	8.4	18.25	10.29
TR61590|c1_g3_i4	7.73	4	11.8	11.93	7.62	15.95	6.85
TR61590|c2_g1_i1	9.84	5.3	16.61	14.29	6.08	13.12	8.86
TR56357|c2_g1_i4	8.45	7.26	4.48	3.99	7.52	3	7.61
TR56740|c0_g1_i1	10.33	9.1	5.57	6.91	8.1	2.47	9.05
TR73284|c0_g1_i3	2.2	3.1	4.38	4.6	5.71	6.32	4.32
Mj_1_GCCAAT_L005_R1_001_(paired)_trimmed_(paired)_contig_57665	0.2	0.47	7.72	4.36	1.91	1.53	1.74
TR72141|c0_g1_i1	8.97	7.31	9.62	9.79	9.57	13.22	7.47
TR72141|c0_g1_i3	7.55	6.2	11.34	10.64	6.77	11.41	8.49
TR51997|c0_g2_i2	11.37	7.84	13.05	14.72	7.36	10.92	7.16
Mj_1_GCCAAT_L005_R1_001_(paired)_trimmed_(paired)_contig_18509	15.13	14.55	48.27	30.59	30.88	26.96	27.63
scaffold14389	5.36	2.34	16.16	8.52	10.2	7.95	7.27
TR72222|c0_g1_i1	33.01	37.53	90.02	110.29	104.26	178.03	83.44
TR59983|c0_g1_i1	11.73	8.86	17.42	15.18	12.4	14.18	12
TR59983|c0_g1_i2	13.26	9.33	19.09	17.26	12.15	18.35	13
Mj_1_GCCAAT_L005_R1_001_(paired)_trimmed_(paired)_contig_1910	52.36	38.99	142.54	94.81	104.82	152.16	78.91
TR56128|c0_g1_i1	80.7	63.51	229.26	131.65	155.64	231.74	122.87
TR57115|c1_g1_i2	58.02	41.35	159.91	96.03	112.77	166.63	88.31
Mj_1_GCCAAT_L005_R1_001_(paired)_trimmed_(paired)_contig_4284	17.63	15.76	40.12	35.58	24.41	20.25	20.82
TR59662|c0_g1_i1	19.4	15.74	48.54	37.58	28.85	22.93	19.66
TR56968|c0_g1_i1	4.94	6.71	20.37	12.51	13.92	16.18	11.78
TR70057|c0_g1_i1	12.19	9.12	29.29	30.18	22.65	24.94	9.59
TR72611|c0_g2_i9	2.63	3.48	5.68	6.75	3.84	6.84	4.77
TR61068|c0_g1_i1	8.15	9.38	25.53	15.82	14.63	21.41	12.53
TR79240|c1_g3_i10	1.07	1.13	4.88	5.36	2.72	4.17	3.65
TR79240|c1_g3_i2	1.73	1.1	9.26	9.73	4.01	5.31	6.42
Mj_1_GCCAAT_L005_R1_001_(paired)_trimmed_(paired)_contig_1064	12.24	9.5	16.4	13.5	9.62	23.94	12.85
Mj_1_GCCAAT_L005_R1_001_(paired)_trimmed_(paired)_contig_11863	3.89	4.21	4.76	3.52	4.12	5.78	4.22
TR79721|c1_g1_i2	2.42	2.21	6.17	4.17	6.2	11.78	3.58
TR72642|c0_g2_i4	2.64	3.42	4.23	4.21	3.57	5.96	4.39
TR63473|c1_g1_i3	6.05	7.29	3.9	5.72	5.39	5.92	6.82
TR78337|c1_g1_i3	2.46	2.82	4	3.21	2.46	5.48	3.55
TR74672|c1_g1_i1	5.41	7.39	10.89	9.37	7.31	10.57	7.44
TR55222|c0_g1_i3	2.54	2.42	5.46	4.15	4.2	3.97	3.58
scaffold10109	4.31	4.27	2.59	2.12	3.93	1.79	5.07
TR58731|c0_g1_i2	7.81	5.29	3.99	4.41	5.54	1.49	5.07
TR49989|c0_g1_i1	71.17	60.77	150.35	135.59	114.51	131.9	88.21
TR69876|c1_g1_i1	15.23	11.94	19.69	20.26	19.43	26.38	17.19
TR49903|c0_g1_i1	26.43	24.14	73.82	50.11	61.49	53.16	43.01
C964704	213.14	182.3	245.06	230.87	235	283.35	222.56
Mj_1_GCCAAT_L005_R1_001_(paired)_trimmed_(paired)_contig_8001	6.24	5.12	8.84	8.81	9.02	10.92	8.51
Mj_1_GCCAAT_L005_R1_001_(paired)_trimmed_(paired)_contig_12649	5.52	5.46	3.37	4.23	3.83	2.28	6.57
TR74813|c0_g1_i2	19.98	17.53	21.06	16.08	17.52	28.47	16.37
TR55673|c0_g1_i1	15.83	7.17	46.61	36.87	41.52	65.13	35.59
TR62190|c1_g1_i2	10.51	12.81	20.64	16.19	15.7	20.21	16.93
TR72418|c0_g1_i1	2.19	2.55	9.26	6.45	3.29	11.66	4.33
TR72418|c0_g1_i3	0.94	1.25	3.74	3.87	2.1	6.77	1.57
TR72418|c0_g1_i6	2.08	3.18	10.4	8.51	3.57	9.77	3.37
TR72605|c1_g2_i3	0.98	1.49	4.48	3.42	1.46	5.44	2.51
TR72605|c1_g2_i4	1.81	2.16	6.67	4.09	2.95	10.78	2.91
TR72605|c1_g2_i7	0.59	1.6	4.28	3.11	2.46	5.68	1.48
TR70611|c1_g1_i1	5.32	3.68	2.13	3.06	3.98	1.66	3.76
TR55901|c0_g1_i2	18.91	12.73	32.44	21.8	25.72	24.32	20.12
TR56534|c0_g2_i3	9.8	5.91	14.12	7.79	10.19	17.81	7.5
TR58373|c1_g1_i1	38.94	40.33	122.91	61.34	81.25	63.68	53.41
scaffold11056	31.44	28.2	72.9	47.79	56.74	45.87	33.27
scaffold11697	13.2	10.52	9.3	15.72	12.26	7.3	11.71
TR58822|c1_g1_i2	6.93	6.21	13.69	8.49	5.66	11.87	5.06
Mj_1_GCCAAT_L005_R1_001_(paired)_trimmed_(paired)_contig_4028	24.43	29.9	14.28	11.69	12.35	2.4	21.32
TR75782|c0_g3_i4	5.36	5.75	3.66	4.48	5.14	4.06	5.77
Mj_1_GCCAAT_L005_R1_001_(paired)_trimmed_(paired)_contig_55756	0.24	0.54	3.72	4.51	1.58	9.56	0.8
TR56841|c0_g1_i1	0.22	0.14	3.05	3.66	1.22	6.28	0.07
TR38031|c0_g1_i1	0.74	0.8	24.42	17.42	8.84	0.47	0.73
TR64066|c2_g1_i1	2.62	7.82	10.21	3.63	5.62	11.25	5.81
TR72264|c1_g1_i1	0.3	2.03	3.35	2.59	1.83	5.43	0.7
TR74895|c0_g3_i1	4	5.43	9.35	7.74	11.44	12.74	7.33
TR74895|c1_g5_i1	3.38	5.84	9.88	7.28	11.29	12.44	6.07
TR76569|c0_g1_i4	1.26	0.8	3.29	2.66	3.13	5.58	2.89
TR58529|c0_g1_i1	4.26	4.67	7.15	7	5.24	6.85	5.94
TR71619|c1_g1_i2	11.71	10.44	15.79	11.33	14.36	15.29	12.74
TR51531|c0_g1_i1	1.26	5.67	47.99	57.67	6.97	88.16	1.07
TR54914|c0_g1_i1	2.43	8.6	72.61	71.67	7.96	116.79	2.77
TR54914|c0_g1_i2	0.57	1.21	21.98	21.78	3.17	47.6	1.12
TR72590|c2_g3_i11	2.31	3.31	4.95	1.67	3	5.15	5.09
Mj_1_GCCAAT_L005_R1_001_(paired)_trimmed_(paired)_contig_3108	34.25	37.52	11.6	22.78	29.58	23.71	29.36
TR61465|c0_g1_i2	41.07	44.07	11.9	24.99	30.04	26.95	34.34
TR62253|c0_g1_i2	32.49	38.04	11.09	21.27	28.67	23.26	29.99
Mj_1_GCCAAT_L005_R1_001_(paired)_trimmed_(paired)_contig_6257	34.02	39.06	104.37	63.71	66.85	70.9	54.39
scaffold1079	35.14	40.06	118.65	69.94	71.29	73.82	58.02
scaffold1080	4.51	4.12	14.25	13	8.57	14.76	8.89
Mj_1_GCCAAT_L005_R1_001_(paired)_trimmed_(paired)_contig_7437	4.12	3.92	4.92	4.22	3.8	5.12	3.78
TR56401|c0_g1_i1	40.22	56.66	88.5	87.48	53.97	51.13	43.95
TR66842|c0_g1_i1	35.4	47.7	66.12	46.97	63.51	76.57	62.32
TR75248|c0_g1_i2	5.79	6.22	3.24	4.3	4.9	2.24	5.51
TR78943|c2_g1_i1	5.21	5.28	3.4	4.01	4.1	1.79	5.13
TR74271|c0_g1_i2	6.66	5.44	10.96	13.6	8.76	9.58	8.28
TR75328|c3_g1_i3	4.88	3.82	7.1	6.59	5.44	5.26	5.45
TR75328|c3_g1_i4	3.99	3.1	7.18	6.48	4.88	5.98	4.9
Mj_1_GCCAAT_L005_R1_001_(paired)_trimmed_(paired)_contig_13634	19.07	11.14	11.46	17.28	15.68	7.08	19.13
Mj_1_GCCAAT_L005_R1_001_(paired)_trimmed_(paired)_contig_18556	7.61	8.36	4.2	3.08	3.39	0.54	6.07
TR77044|c0_g1_i1	3.48	2.92	1.49	2.77	3.32	0.11	5.45
Mj_1_GCCAAT_L005_R1_001_(paired)_trimmed_(paired)_contig_45031	4.09	3.23	0.69	2.97	3.85	0	5.54
TR78908|c2_g1_i4	2.52	2.3	3.61	2.96	3.28	5.12	2.59
TR77549|c3_g4_i21	2.18	2.34	7.46	1.05	1.84	6.22	3.55
TR78049|c0_g1_i1	9.81	7.61	11.76	10.98	10.76	13.25	9.33
TR75560|c1_g1_i6	2.24	1.27	3.96	2.56	2.52	5.86	2.42
TR77340|c0_g2_i3	1.87	1.56	4.54	2.17	3.58	5.31	3.03
TR76473|c0_g1_i13	5.02	4.93	8.78	7.39	8.34	11.96	7.97
TR76473|c0_g1_i17	3.17	3.72	4.58	4.12	5.39	6.08	4.41
TR46519|c0_g1_i1	25.45	23.22	34.76	34.61	44.38	48.73	31.06
TR61823|c0_g2_i1	95.59	76.89	180.13	140.97	124.05	105.46	106.97
TR73800|c0_g3_i2	8.68	7.89	16.11	11.78	7.89	13.95	12.02
TR67861|c1_g1_i3	4.78	3.95	6.63	5.07	4.62	6.15	5.66
TR67167|c0_g2_i1	28.38	21.97	42.24	35.27	43.51	54.45	28.34
TR57187|c2_g1_i6	4.41	4.37	8.2	4.77	7.8	7.46	6.97
TR73736|c0_g1_i1	5.42	6	8.53	7.58	8.22	10.23	6.33
TR73736|c0_g1_i5	6.04	5.92	6.76	6.57	6.33	8.05	5.35
TR62792|c0_g1_i1	10.6	9.99	14.64	12.91	16.75	18.48	11.72
TR59347|c0_g1_i1	9.25	7.41	14.77	12.09	11.13	9.89	8.5
TR59588|c0_g1_i3	0	0	8.81	3.5	1.98	4.73	0.58
scaffold11636	0	0	7.54	2.96	2.23	6.93	0.83
C968664	9.78	12.1	6.19	7.6	8.82	3	11.18
TR69540|c2_g3_i2	6.05	4.79	8.06	5.8	8.55	8	6.53
Mj_1_GCCAAT_L005_R1_001_(paired)_trimmed_(paired)_contig_8489	16.51	17.46	26.4	20.7	15.07	24.96	16.53
Mj_1_GCCAAT_L005_R1_001_(paired)_trimmed_(paired)_contig_9898	8.01	7.36	12.91	6.98	6.72	12	10.73
TR78789|c0_g1_i3	15.43	15.76	23.21	20.1	12.92	25.14	15.24
TR78789|c0_g1_i4	10.68	9.53	19.63	13	11.27	16.2	11.68
Mj_1_GCCAAT_L005_R1_001_(paired)_trimmed_(paired)_contig_18593	10.25	7.57	16.62	12.41	11.94	12.08	9.61
TR78077|c0_g1_i1	3.13	3.52	4.69	5.28	4.69	6.86	4.59
Mj_1_GCCAAT_L005_R1_001_(paired)_trimmed_(paired)_contig_1497	29.55	25.55	57.28	37.72	40.99	37.52	36.76
TR54276|c0_g1_i1	43.88	38.42	93.16	65.94	66.55	49.77	60.62
TR50361|c0_g1_i1	37.24	30.43	47.37	44.44	31.06	36.48	36.86
TR63547|c1_g1_i1	3.52	3.49	7.66	6.46	6.69	6.92	3.74
TR62620|c0_g1_i1	5.52	4.08	39.38	14.33	10.63	24.06	3.67
TR62620|c0_g1_i2	4.95	6.6	37.28	14.51	10.05	24.47	5.64
TR53291|c0_g1_i1	2.72	3.57	24.38	33.57	17.21	57.58	8.71
TR72803|c1_g3_i1	15.95	13.21	18.54	15.31	15.74	17.64	16.02
TR53070|c0_g1_i1	10.61	22.47	93.23	44.28	67.04	38.01	24.73
TR67887|c0_g1_i3	6.75	4.88	9.94	6.52	9.07	8.62	7.06
TR59811|c0_g1_i1	29.93	29.72	81.89	72.99	50.1	47.09	37.43
TR68954|c0_g1_i1	11.98	7.58	12.81	9.96	10.49	15.99	9.22
Mj_1_GCCAAT_L005_R1_001_(paired)_trimmed_(paired)_contig_22358	11.7	13.71	6.04	3.72	8.37	0.5	11.64
TR56168|c1_g1_i5	18.89	16.94	33.47	32.14	27.8	31.08	24.3
TR67408|c1_g1_i3	7.18	8.08	10.71	7.6	8.59	9.39	6.76
TR78486|c0_g1_i1	7.03	6.11	10.34	8.81	7.12	9.1	5.64
Mj_1_GCCAAT_L005_R1_001_(paired)_trimmed_(paired)_contig_5101	210.12	234.37	1050.42	955.24	337.57	348.13	312.54
TR48890|c0_g1_i1	2.07	2.56	5.02	2.79	3.85	8.27	5.11
TR22320|c0_g1_i1	1.15	0.94	44.77	11.7	23.02	36.37	4.85
TR22320|c0_g1_i2	1.72	1.31	43.88	17.16	21.8	47.8	4.06
Mj_1_GCCAAT_L005_R1_001_(paired)_trimmed_(paired)_contig_9267	20.41	22.13	30.18	30.85	27.6	43.7	29.77
scaffold12356	3.14	4.8	5.54	6.73	7.74	9.23	5.57
Mj_1_GCCAAT_L005_R1_001_(paired)_trimmed_(paired)_contig_3744	28.04	20.53	50.63	47.99	31.73	49.14	33.51
TR70186|c0_g1_i1	25.29	20.9	45.8	46.82	32.97	40.94	28.54
TR69245|c0_g1_i2	3.53	6.1	16.33	10.46	6.04	11.44	6.57
TR69245|c0_g1_i7	2.48	5.57	12.02	7.87	5.67	8.91	5.75
TR69245|c0_g1_i8	3.06	4.93	14.09	12.73	5.4	12.75	7.73
TR73380|c0_g1_i1	10.64	8.1	12.87	10.3	10.85	13.48	11.56
TR73380|c0_g1_i2	10.73	8.22	13.22	12.47	12.39	14.54	11.23
Mj_1_GCCAAT_L005_R1_001_(paired)_trimmed_(paired)_contig_23384	5.04	5.59	11.87	10.92	8.68	13.45	7.76
TR62925|c2_g1_i1	10.1	9.54	24.71	19.77	17.8	24.38	17.65
TR78315|c1_g1_i4	2.28	3.07	4.79	1.77	1.81	5.17	3.78
TR59829|c0_g1_i5	1.66	2.54	4.9	3.7	5.47	5.17	3.12
Mj_1_GCCAAT_L005_R1_001_(paired)_trimmed_(paired)_contig_2283	8.65	11.79	18.81	10.35	14.21	18.44	10.83
TR53492|c0_g1_i4	3.52	5.68	5.99	4.5	4.44	9.53	5.15
TR75360|c2_g1_i1	3.7	4.69	7.88	6.39	6.29	10.47	6.31
scaffold11626	13.24	11.98	18.07	13.62	11.83	18.32	14.16
C948782	6.54	6.99	18.93	9.97	16.44	17.73	9.16
Mj_1_GCCAAT_L005_R1_001_(paired)_trimmed_(paired)_contig_7373	2.83	3.31	5.18	3.42	3.11	4.66	3.86
TR69931|c0_g1_i2	3.54	3.94	6.65	4.44	3.51	5.55	4.17
TR69931|c0_g1_i3	3.31	2.97	5.52	4.06	3.33	5.16	3.67
TR70058|c0_g1_i6	3.13	3.44	5.5	3.67	3.52	4.8	4.14
TR72745|c0_g1_i1	3.06	4.14	6.52	3.74	4.88	10.56	5.48
TR72162|c0_g1_i1	4.48	4.83	19.89	12.64	3.8	11.67	6.34
TR76674|c1_g1_i3	7.88	7.01	14.05	12.73	10.95	10.06	8.65
TR46156|c0_g1_i1	1.09	0.45	9.2	2.23	6.07	11.44	2.46
TR27068|c0_g1_i1	0	0	2.44	1.26	0.95	5.13	0
TR69608|c1_g2_i1	2.87	2.16	5.31	3.25	3.06	7.49	4.65
TR70699|c0_g1_i1	2.98	2.36	4.13	3.85	3.36	5.75	3.9
Mj_1_GCCAAT_L005_R1_001_(paired)_trimmed_(paired)_contig_22201	3.62	2.58	4.59	3.15	2.63	7.13	2.74
TR66023|c1_g2_i2	2.22	0.99	2.88	2.12	1	6.94	1.03
TR66687|c1_g2_i5	4.42	2.7	7.08	5.04	3.96	13.91	3.31
TR68744|c0_g1_i2	9.11	9.05	17.04	12.37	11.62	11.04	4.58
TR70358|c0_g2_i1	7.04	7.68	13.82	11.87	8.62	10.27	4.29
TR70358|c0_g2_i3	6.6	7.36	13.23	9.9	9.56	9.85	3.65
TR64862|c0_g1_i2	2.4	2.62	4.36	3.45	4.62	5.24	3.39
TR64862|c0_g1_i3	2.72	2.96	5.6	3.79	4	6.26	4.31
TR63572|c2_g1_i2	4.95	2.9	5.74	4.51	4.99	8.82	3.54
TR71391|c0_g1_i3	13.43	10.25	8.8	9.21	13.19	8.65	11.82
Mj_1_GCCAAT_L005_R1_001_(paired)_trimmed_(paired)_contig_519	10.3	11.61	19	14.05	17.44	21.12	14.02
TR53402|c0_g1_i1	9.2	8.41	5.27	6.09	4.78	2.42	4.92
TR57533|c0_g1_i5	4.66	5.57	1.57	1.3	2.33	2.23	3.73
TR67876|c1_g1_i3	0.39	0.48	5.34	4.28	3.03	1.31	2.1
TR73847|c2_g2_i10	1.01	0.59	5.89	4.3	3.38	1.82	2
TR73847|c2_g2_i3	0.52	0.5	5.89	4.03	3.94	1.17	2.03
TR71907|c0_g1_i1	11.45	12.09	5.73	9.21	8	5.49	7.24
TR71122|c0_g1_i7	2.29	1.54	5.77	3.91	2.44	2.04	3.12
TR53719|c0_g1_i1	4.55	3.59	7.8	5.98	4.28	7.07	6.15
Mj_1_GCCAAT_L005_R1_001_(paired)_trimmed_(paired)_contig_7786	7.55	8.05	11.49	12.15	9.42	18.41	8.68
TR76163|c1_g1_i7	3.95	3.76	10.05	8.48	6.89	7.88	4.81
TR78823|c0_g2_i2	5.5	5.28	6.28	5.67	4.7	7.16	5.33
TR52211|c0_g1_i1	0.91	8.93	61.29	64.74	25.39	0.75	4.25
TR72118|c0_g1_i1	14.39	16.95	38.8	32.9	31.24	25.42	16.49
TR69121|c0_g1_i2	4.33	2.88	7.8	5.86	5.4	5.65	2.5
TR69239|c0_g1_i1	4.75	4.73	7.48	8.26	4.72	6.44	4.48
TR70898|c0_g1_i3	1.64	0.88	3.73	3.41	4.75	5.69	3.23
TR70913|c0_g2_i2	4.76	2.86	6.43	5.11	4.37	5.54	3.96
TR79268|c0_g1_i2	1.43	1.58	3.27	3.06	3.86	5.1	2.92
TR66684|c0_g1_i3	10.84	9.88	6.98	5.09	4.92	2.35	6.86
Mj_1_GCCAAT_L005_R1_001_(paired)_trimmed_(paired)_contig_12244	7.79	6.31	10.61	7.9	9.87	13.93	8.91
TR78933|c0_g1_i3	12.37	11.11	16.53	11.92	13.11	21.35	13.76
Mj_1_GCCAAT_L005_R1_001_(paired)_trimmed_(paired)_contig_10549	3.53	4.16	5.43	3	5.64	4.79	2.93
TR77095|c0_g1_i1	6.66	5.1	9.88	8.83	8.72	12.32	8.34
Mj_1_GCCAAT_L005_R1_001_(paired)_trimmed_(paired)_contig_8446	2.72	9.28	0.67	8.64	7.46	1.38	4.47
TR58476|c0_g2_i1	37.77	28.44	54.3	64.59	49.26	54.49	42.15
scaffold13942	30.72	24.98	43.92	50.78	40.25	42.61	34.9
TR78404|c0_g1_i2	4.39	6.28	2.16	3.07	3.97	1.53	4.02
TR78404|c0_g1_i4	4	5.68	1.81	2.53	2.8	0.86	3.47
TR78654|c1_g1_i1	4.82	5.17	1.8	2.55	2.99	0.87	3.42
TR78654|c1_g1_i2	5.07	6.08	2.47	4.22	3.73	1.05	3.43
TR78654|c1_g1_i4	4.6	5.67	2.06	2.71	3.21	0.83	3.19
TR52285|c0_g1_i1	35.13	28.69	53.4	62.67	44.47	49.72	37.66
C937314	10.27	12.92	32.24	32.03	25.31	26.95	17.54
TR47108|c0_g1_i1	6.6	7.27	23.61	13.53	13.82	16.2	10.82
Mj_1_GCCAAT_L005_R1_001_(paired)_trimmed_(paired)_contig_1100	9.68	7.27	20.75	20.05	13.23	19.83	9.95
TR70282|c1_g5_i2	9.15	7.32	15.83	14.45	10.71	16	8.1
TR70282|c1_g5_i3	7.45	7.53	12.65	13.59	8.98	13.03	7.48
TR69585|c1_g1_i1	20.49	18.74	38.95	33.24	24.43	39.34	18.37
TR69585|c1_g1_i2	19.52	16.75	38.53	30.1	24.19	38.03	16.73
scaffold11190	20.33	20.46	39.08	33.59	24.12	38.9	19.52
TR71838|c0_g2_i1	8.15	7.36	12.76	15.17	14.31	21.6	11.56
TR34913|c0_g1_i1	40.87	31.02	85.94	58.47	80.72	86.8	64.86
TR21118|c0_g2_i1	3.39	2.03	7.74	9.73	4.74	6.8	7.72
TR72023|c0_g1_i1	12.7	10.19	27.06	23.6	19.33	22.5	14.21
TR74008|c1_g1_i6	3.54	6.08	0.45	5.24	6.27	1.91	3.56
TR62468|c0_g2_i1	2.73	9.71	27.09	17.48	11.15	16.13	11.84
TR62468|c0_g2_i2	0.28	2	7.42	5.56	4.82	4.04	3.59
TR79820|c4_g2_i10	1.61	4.71	9.85	6.9	4.84	5.95	6.07
TR60177|c0_g1_i1	7.94	8.16	11.95	11.18	8.33	7.06	8.73
TR51824|c0_g2_i2	8.13	9.75	31.12	13.66	25.7	22.16	7.25
TR74293|c0_g1_i6	3.8	3.72	6.87	5.63	5.95	4.48	4.45
Mj_1_GCCAAT_L005_R1_001_(paired)_trimmed_(paired)_contig_719	24.19	22.2	57.77	46.05	40.68	57.23	43.65
TR66109|c1_g1_i4	2.53	1.49	4.81	5.55	2.9	6.46	2.68
TR74000|c0_g1_i2	1.71	1.93	3.46	2.9	2.9	5.55	2.91
TR74345|c0_g1_i2	2.53	3.56	5.81	6.57	4.91	8.62	5.22
TR64113|c2_g4_i1	4.86	3.89	9.59	8.07	8.03	7.71	6.07
TR64113|c2_g4_i4	5.91	5.34	10.53	7.83	8.64	9.48	7.98
TR76148|c2_g2_i1	12.97	14.24	4.04	6.75	9.09	9.04	14.85
TR76148|c2_g2_i3	7.82	8.62	3.66	5.45	8.41	7.92	10.09
TR76148|c2_g2_i4	10.49	13.17	5.52	5.19	10.78	9.55	13.53
Mj_1_GCCAAT_L005_R1_001_(paired)_trimmed_(paired)_contig_14421	26.18	30.34	11.51	16.8	22.96	8.44	38.52
TR65016|c0_g2_i2	15.39	15.66	11.43	9.74	10.22	4.97	12.81
Mj_1_GCCAAT_L005_R1_001_(paired)_trimmed_(paired)_contig_16256	2.69	3.09	5.55	3.85	3.63	7.04	3.99
Mj_1_GCCAAT_L005_R1_001_(paired)_trimmed_(paired)_contig_10272	6.3	11.26	17.87	10.25	7	16.66	15.44
scaffold1454	1.9	2.59	4.61	3.02	3.32	6.28	4.06
scaffold1456	2.7	4.9	7.87	5.78	4.06	7.87	6.53
Mj_1_GCCAAT_L005_R1_001_(paired)_trimmed_(paired)_contig_53517	0.49	1.59	7.49	11.99	4.7	13.18	2.22
TR67671|c0_g1_i1	1.6	2.28	10.85	20.88	7.71	19.95	2.63
TR75663|c1_g1_i3	2.69	3.06	5.74	2.45	4.99	4.71	3.92
TR57629|c0_g1_i2	0.46	0.55	6.28	3.84	0.17	10.88	0.79
TR57629|c0_g1_i5	0.26	0.7	3.83	2.26	0.39	9.01	0.67
TR63522|c0_g1_i1	0.49	0.62	4.37	2.7	0	11.53	0.54
TR63522|c0_g1_i2	0.27	0.73	4.44	2.44	0.08	10	0.38
TR63522|c0_g1_i4	0.29	0.46	3.9	2.72	0.15	8.31	0.38
Mj_1_GCCAAT_L005_R1_001_(paired)_trimmed_(paired)_contig_222	5.89	8.44	2.91	3.69	6.76	3.53	5.46
Mj_1_GCCAAT_L005_R1_001_(paired)_trimmed_(paired)_contig_8659	10.97	9.95	19.22	12.24	13.48	17.07	12.18
TR70844|c1_g2_i1	13.56	11.56	26.17	17.98	18.77	22.69	16.21
Mj_1_GCCAAT_L005_R1_001_(paired)_trimmed_(paired)_contig_13263	5.34	3.45	6.7	6.59	4.66	8.26	5.53
TR68392|c0_g1_i1	5.85	4.84	9.53	8.72	5.72	7.6	5.78
TR75149|c0_g1_i3	6.25	3.31	3.03	4.02	5.31	1.74	3.74
TR70270|c0_g3_i4	5.41	4.02	7.24	6.72	4.68	11.96	4.44
Mj_1_GCCAAT_L005_R1_001_(paired)_trimmed_(paired)_contig_2813	10.32	7.8	19.36	10.58	12.02	16.91	15.43
Mj_1_GCCAAT_L005_R1_001_(paired)_trimmed_(paired)_contig_23131	4.24	9.4	14.37	17.09	2.73	13.7	9.83
TR67522|c0_g1_i1	1.79	7.63	18.14	16.52	3.4	14.08	6.48
TR67983|c2_g1_i2	5.97	9.76	15.66	19.95	4.57	15.61	12.06
TR74466|c0_g1_i2	4.27	4.16	6.3	5.09	6.81	7.93	5.45
TR76932|c0_g1_i4	17.22	13.99	31.69	22.35	25.2	23.93	20
TR74562|c0_g1_i1	7.52	5.65	19.23	20.66	10.32	9.06	8.02
TR77363|c0_g1_i2	4.99	4.52	14.66	13.52	8.59	6.22	6.39
TR66938|c1_g1_i3	8.91	7.72	11.09	8.31	8.38	10.87	10.96
Mj_1_GCCAAT_L005_R1_001_(paired)_trimmed_(paired)_contig_7723	5.97	6.05	0.52	4.23	6.12	0.15	2.01
TR65296|c0_g1_i1	6.49	7.41	0.89	4.97	7.35	0.19	3.62
TR65296|c0_g1_i3	7.43	8.09	0.56	5.23	6.63	0.14	3.97
TR65296|c0_g1_i4	6.53	8.81	0.88	4.97	6.07	0.09	2.3
TR65296|c0_g1_i6	8.12	9.11	0.88	5.14	8.63	0.1	3.62
Mj_1_GCCAAT_L005_R1_001_(paired)_trimmed_(paired)_contig_2663	20.17	9.56	30.19	28.98	15.62	25.62	20.55
TR73605|c0_g4_i3	21.97	10.57	33.56	32.88	17.28	31.22	21.76
scaffold10434	5.18	7.5	2.48	3.07	3.53	1.34	4.35
TR39040|c0_g1_i1	1.43	0.51	5.28	1.14	0	5.37	0.53
scaffold12433	40.65	37	100.2	71.34	77.11	70.74	66.41
Mj_1_GCCAAT_L005_R1_001_(paired)_trimmed_(paired)_contig_3783	97.17	105.28	168.69	149.96	143.91	144.42	117.3
TR64964|c0_g1_i1	150.1	163.57	235.91	224.01	208.12	213.61	177.08
TR65118|c0_g1_i1	16.29	11.41	32.22	24.16	19.89	25.06	13.92
TR67494|c0_g1_i4	1.33	0.32	4.51	5.29	7.47	8.69	3.78
TR75722|c0_g3_i1	7.68	7	10.9	7.39	7.8	10.28	10.09
Mj_1_GCCAAT_L005_R1_001_(paired)_trimmed_(paired)_contig_20182	4.62	6.45	9.57	14.21	11.72	20.34	11.73
TR72780|c0_g1_i6	2.64	1.87	5.12	2.97	3.97	6.71	2
C974434	0.81	1.62	7.44	5.98	3.45	6.79	1.41
TR67144|c0_g1_i1	5.94	5.19	9.03	8.09	6.9	12.3	8.76
TR67144|c0_g1_i10	2.88	3.46	4.01	3.86	4.42	5.21	4.05
TR60039|c1_g1_i1	18.62	15.05	41.88	31.71	16.41	35.18	17.97
TR64293|c0_g1_i1	17.67	14.25	26.73	19.48	22.54	27.39	22.46
TR65238|c0_g1_i6	4.72	4.98	7.14	5.9	6.23	6.98	4.61
TR62409|c0_g1_i1	2.28	2.41	5.11	5.06	3.06	5.55	2.25
Mj_1_GCCAAT_L005_R1_001_(paired)_trimmed_(paired)_contig_21430	0.89	2.15	6.68	4.77	1.34	16.19	1.51
TR70305|c0_g1_i1	5.67	3.52	10.1	9.96	4.78	11.05	7.12
TR74815|c0_g1_i3	5.13	4.89	7.05	5.82	7.68	8.69	6.75
Mj_1_GCCAAT_L005_R1_001_(paired)_trimmed_(paired)_contig_25437	1.37	0.56	5.54	8.39	3.51	9.34	1.35
TR56743|c0_g1_i1	5.37	4.22	7.23	7.6	5.15	7.86	4.16
TR68615|c0_g1_i2	4.81	4.08	6.77	6.17	4.8	6.48	5.12
Mj_1_GCCAAT_L005_R1_001_(paired)_trimmed_(paired)_contig_5737	20.06	15.63	37.84	29.01	34.11	35.16	26.74
TR57419|c0_g1_i1	9.4	9.43	48.16	37.31	6.79	39.66	14.99
Mj_1_GCCAAT_L005_R1_001_(paired)_trimmed_(paired)_contig_6407	2.65	3.24	9.4	4.64	5.09	7.73	4.34
scaffold10843	2.75	2.47	5.71	3.08	1.69	5.74	3.19
TR30882|c0_g1_i1	6.34	8.36	24.84	28.05	21.77	64.79	15.03
Mj_1_GCCAAT_L005_R1_001_(paired)_trimmed_(paired)_contig_4956	4.51	3.54	8.85	7.31	6.06	5.73	4.22
TR77361|c0_g1_i3	5.53	4.09	10.37	8.98	6.77	9.42	6.58
TR75966|c0_g2_i1	12.24	12.8	16.5	17.39	12.65	18.5	11.28
TR39783|c0_g1_i1	35.69	37.43	91.96	97.26	69.85	78.29	52.92
TR72929|c4_g1_i4	9.98	6.9	42.73	23.23	23.03	21.04	19.58
TR70851|c0_g1_i1	12.29	11.31	7.68	9.91	8.58	7.75	9.87
TR58381|c0_g1_i2	2.87	1.7	5	4.72	3.26	9.25	3.22
TR59910|c0_g1_i1	23.56	19.07	51.93	30.27	36.04	33.55	28.14
TR77213|c3_g3_i5	18.31	15.64	38	32.11	26.32	41.95	20.85
TR75170|c1_g1_i2	1.56	2.11	7.34	4.07	4.41	5.59	3.36
TR75653|c0_g1_i7	2.13	0.98	5	4.76	3.97	6.15	3.52
TR50710|c2_g1_i4	6.62	5.24	23.12	17.16	6.71	7.25	4.12
TR66095|c2_g1_i1	5.05	4.45	12.86	9.61	9.95	10.52	7.57
TR67475|c0_g1_i4	3.52	3.5	6.73	4.65	3.73	7.32	4.77
TR62371|c0_g1_i2	6.08	4.51	9.89	5.83	8.85	8.76	6.62
TR65808|c0_g1_i1	5.81	6.36	2.79	2.05	6.13	4.07	3.08
TR63006|c1_g1_i2	7.77	5.33	12.86	12.99	12.89	16.83	10.76
TR64363|c2_g1_i8	8.21	7.91	11.78	13.08	12.7	16.94	10.69
TR54415|c0_g1_i2	22.1	29.98	62.44	68.83	46.8	45.71	33.54
TR73037|c0_g1_i2	2.76	3.56	5.9	7.16	7.53	9.51	6.54
TR73037|c0_g1_i4	1.99	2.38	3.82	4.95	4.29	6.51	3.69
Mj_1_GCCAAT_L005_R1_001_(paired)_trimmed_(paired)_contig_8928	0.71	1.47	4.46	1.39	1.07	7.8	0.61
TR74343|c1_g4_i2	3.52	2.39	4.56	3.65	3.29	5.38	3.14
TR52179|c0_g1_i1	6.32	8	3.46	3.57	6.05	5.99	5.11
TR55929|c0_g1_i1	1.68	2.46	6.38	2.87	4.25	5.45	3.31
Mj_1_GCCAAT_L005_R1_001_(paired)_trimmed_(paired)_contig_320	33.27	19.42	46	36.63	27.95	38.98	24.07
TR51273|c1_g1_i1	6.54	5.41	12.48	10.38	10.43	16.93	4.3
TR62056|c0_g1_i2	10.16	7.78	14.91	15.4	14.99	19.03	11.23
TR71015|c2_g1_i2	10.26	12.19	5.21	2.99	5.56	2.73	11.79
TR75283|c0_g2_i1	2.42	4.26	6.86	7.86	6.07	13.36	7.8
TR75283|c0_g2_i5	3.51	4.68	9.32	7.47	6.2	12.5	7.78
TR78204|c0_g2_i3	4.72	3.41	6.56	5.22	5.34	6.98	5.92
TR57179|c0_g1_i2	5.61	2.68	9.77	6.01	7.31	12.07	6.86
Mj_1_GCCAAT_L005_R1_001_(paired)_trimmed_(paired)_contig_19895	3.17	1.07	4.94	1.95	4.75	5.24	3.23
Mj_1_GCCAAT_L005_R1_001_(paired)_trimmed_(paired)_contig_2086	20.87	16.62	32.7	24.47	25.55	30.87	22.07
TR53975|c0_g1_i2	18.57	17.15	35.98	26.72	24.17	28.81	24
TR59482|c0_g1_i1	6.79	6.09	18.55	11.44	13.01	9.51	9.92
TR59482|c0_g1_i2	6.41	5.87	13.06	9.98	9.4	9.5	6.99
TR62581|c1_g2_i2	0.92	1.09	5.13	3.65	3.44	4.21	3.29
TR71066|c0_g1_i3	5.45	3.67	10.37	13.53	12.77	17.39	8.51
TR70380|c1_g2_i2	2.8	3.41	5.69	2.41	3.02	5.05	2
TR77377|c2_g2_i3	0.94	0.9	3.82	5.66	3.14	6.29	1.03
TR51768|c0_g1_i1	48.75	44.6	143.91	83.59	104.65	119.18	77.06
TR77189|c0_g1_i3	2.95	2.87	7.11	5.29	5.79	5.19	4.27
TR66993|c0_g1_i6	3.11	2.89	4.76	4.91	4.93	7.51	4.23
TR63269|c0_g1_i1	0.32	0.6	5.35	4.54	3.8	9.06	0.63
TR59527|c0_g3_i5	1.15	1.14	5.96	3.96	3.02	5.5	3.4
TR76113|c0_g6_i1	14.16	20.84	25.53	24.19	10.6	26.02	14.1
TR76113|c0_g6_i4	13.65	20.88	25.17	25.64	10.3	20.62	14.16
TR74223|c0_g1_i3	2.77	3.42	5.26	4.1	4.38	5.1	3.46
TR73802|c2_g3_i1	15.03	13.02	22.82	21.03	16.12	21.61	15.2
TR74297|c0_g1_i3	80.21	61.11	89.29	88.95	56.12	75.24	68.47
Mj_1_GCCAAT_L005_R1_001_(paired)_trimmed_(paired)_contig_16024	10.43	9.81	23.18	17.32	18.01	15.35	12.5
TR75484|c0_g1_i1	7.12	6.15	5.12	4.41	4.03	3.12	4.83
TR67795|c0_g1_i3	24.79	26.56	30.49	22.41	21.73	29.63	21.67
Mj_1_GCCAAT_L005_R1_001_(paired)_trimmed_(paired)_contig_32001	3.22	0.17	9.7	4.26	2.67	11.11	4.06
TR72298|c2_g1_i2	3.46	2.86	4.66	4.73	3.97	5.99	4.49
scaffold11090	11.84	9.74	15.97	14.44	13.44	22.5	12.8
Mj_1_GCCAAT_L005_R1_001_(paired)_trimmed_(paired)_contig_5677	4.55	3.33	5.75	3.73	4.02	5.22	4.05
Mj_1_GCCAAT_L005_R1_001_(paired)_trimmed_(paired)_contig_16528	13.88	9.43	16.71	9.55	11.53	16.26	12.47
TR72648|c0_g1_i2	38.18	27.36	48.45	44.55	34.75	55.54	30.6
TR67044|c0_g2_i1	5.37	5.81	8.02	4.14	6.07	10.31	6.86
TR63732|c0_g5_i1	7.73	8.49	9.84	10.76	7.74	9.87	7.43
Mj_1_GCCAAT_L005_R1_001_(paired)_trimmed_(paired)_contig_5545	10.28	7.53	18.71	15.61	10.57	17.98	15.16
TR68630|c2_g1_i1	13.96	10.78	18.47	15.56	11.78	19.61	16.83
TR38673|c0_g1_i1	4.59	3.64	5.33	2.88	2.93	7.53	3.37
TR38673|c0_g1_i2	4.97	3.82	5.69	3.25	4.5	7.52	4.64
TR75970|c1_g1_i4	2.61	2.77	6.2	3.75	5.31	6.03	5.15
scaffold11782	2.27	2.35	5.39	3.45	4.77	4.67	3.61
TR72309|c1_g4_i1	5	4.8	3.1	0.83	4.69	2.32	4.91
TR74319|c0_g1_i2	4.03	4.75	6	5.69	4.52	7.85	5.14
TR77698|c2_g1_i2	3.47	3.21	5	4.19	3.53	5.1	4.33
TR50853|c0_g1_i1	39.73	36.04	191.56	88.75	157.62	175.2	76.38
TR53005|c0_g1_i1	15.37	14.54	28.11	30.09	23.44	22.04	10.74
TR78611|c0_g1_i1	5.98	4.42	7.03	5.44	5.49	8.63	3.05
TR77363|c0_g1_i1	3.97	3.86	11.96	10.63	7.18	5.36	4.6
Mj_1_GCCAAT_L005_R1_001_(paired)_trimmed_(paired)_contig_4923	15.13	14.31	12.37	12.8	16.1	14.6	16.1
TR55495|c0_g1_i1	26.65	21.44	63.13	54.55	43.65	47.94	24.81
TR66130|c0_g2_i1	9.05	5.86	3.18	8.56	5.54	1.24	6.62
TR60759|c0_g1_i1	1.3	0.83	6.63	3.21	5.18	7.05	1.71
TR55102|c1_g1_i3	1.82	2.77	11.12	7.89	1.09	16.7	2.75
TR46411|c0_g1_i3	6.87	6.37	10.37	6.8	8	10.21	8.88
TR46543|c0_g1_i1	2.12	3.45	5.74	5.7	7.58	8.91	5.22
TR49004|c0_g1_i1	6.87	4.61	17.52	14.49	8.18	8.35	6.31
Mj_1_GCCAAT_L005_R1_001_(paired)_trimmed_(paired)_contig_16503	13.07	13.29	28.26	21.01	20.36	21.53	16.32
TR71079|c0_g1_i4	1.91	6.83	11.92	8.64	3.25	12.97	7.8
TR50631|c0_g1_i1	5.11	5.82	12.02	9.89	7.09	17.17	5.9
Mj_1_GCCAAT_L005_R1_001_(paired)_trimmed_(paired)_contig_2995	20.29	12.81	34	32.43	31.22	45.55	26.02
TR77831|c0_g1_i1	3.96	5.57	9.63	9.59	8.23	17.75	9.08
Mj_1_GCCAAT_L005_R1_001_(paired)_trimmed_(paired)_contig_2266	5.37	4	8.88	6.81	7.08	7.28	5.95
Mj_1_GCCAAT_L005_R1_001_(paired)_trimmed_(paired)_contig_6495	7.22	7.44	10.87	10.95	6.32	11.54	6.22
TR72240|c3_g4_i2	10.51	9.72	14.01	16.27	10.29	13.55	7.87
TR72240|c3_g4_i3	6.8	6.03	11.59	11.89	7.2	11.55	6.76
Mj_1_GCCAAT_L005_R1_001_(paired)_trimmed_(paired)_contig_6899	18.18	19.65	7.19	10.3	10.84	11.05	18.66
TR74737|c0_g1_i1	19.1	19.1	8.25	10.36	11.98	12.09	19.66
TR73371|c1_g2_i2	15.25	17.83	6.33	9.99	15.92	7.55	14.86
Mj_1_GCCAAT_L005_R1_001_(paired)_trimmed_(paired)_contig_10598	3.84	0.18	7.64	11.79	4.49	7.83	4.12
TR68472|c0_g1_i2	4.53	0.57	9.3	12.6	4.28	11.6	3.85
TR77101|c0_g1_i1	7.89	8.28	18.07	10.89	9.15	14.35	11.36
TR50329|c0_g1_i1	48.44	38.2	128.85	68.48	81.98	65.79	64.81
scaffold11042	23.29	20.78	57.26	38.3	29.69	27.56	28.41
TR60271|c0_g1_i1	3.84	3.81	7.82	6.09	6.18	6.39	5.24
TR65866|c0_g1_i1	2.06	2.8	5.06	3	4.37	7.82	4.24
TR62195|c0_g1_i5	5.53	4.08	2.99	2.69	5.57	4.13	3.6
TR54703|c0_g1_i3	4.8	3.6	11.91	8.7	7.68	8.17	5.24
TR71098|c1_g1_i4	4.55	3.3	7.86	8.59	7.52	11.35	5.35
TR68394|c0_g1_i1	14.82	14.44	13	15.03	13.86	11.62	12.99
scaffold13562	10.25	8.73	7.22	9.12	9.13	5.45	9.6
TR60306|c2_g1_i1	4.25	3.97	7.11	7.45	8.81	11.94	6.64
TR76129|c2_g3_i1	8.56	9.57	4.61	4.47	11.72	4.76	9.29
TR77800|c0_g1_i3	4.38	4.55	9.38	6.45	5.79	7.33	5.32
scaffold11789	3.03	3.84	6.31	5.32	3.73	3.98	3.53
TR69530|c0_g1_i3	1.85	2.13	5.45	3.52	4.42	4.51	2.37
Mj_1_GCCAAT_L005_R1_001_(paired)_trimmed_(paired)_contig_20105	11.06	12.41	27.12	20.65	20.87	18.38	18.06
TR73388|c0_g1_i1	7.04	6.6	11.64	11.78	8.6	13.85	7.13
TR73388|c0_g1_i3	7.54	6.8	13.43	11.94	9.72	11.97	8.47
Mj_1_GCCAAT_L005_R1_001_(paired)_trimmed_(paired)_contig_16075	17.81	17.51	31.55	33.63	23.57	26.9	15.38
TR67965|c0_g1_i1	23.85	19.87	26.79	19.88	18.58	39.57	23.74
TR77844|c0_g2_i2	7.59	6.33	10.86	10.47	8.62	8.41	9.26
TR53543|c0_g1_i1	3.2	4.75	15.42	5.74	4.59	21.83	1.38
TR53543|c0_g1_i2	3.32	3.56	11.22	6.04	4.12	20.81	2.76
TR55961|c0_g1_i2	3.15	0.92	7.52	5.9	0.51	4.08	3.49
TR77428|c1_g1_i5	2.18	1.37	5.87	2.77	2.56	4.79	3.73
TR77461|c0_g1_i3	2.28	2.06	6.18	2.91	3.09	5.16	4.52
TR69641|c0_g1_i3	5.92	5.24	10.71	5.21	9.99	11.89	8.98
TR77763|c0_g1_i3	26.99	25.94	32.95	35.3	31.44	39.65	29.1
TR76568|c0_g2_i4	7.33	6.66	10.6	9.06	9.97	11.53	8.42
TR77361|c0_g1_i2	7.43	7.92	12.45	12.28	10.35	12.74	9.43
Mj_1_GCCAAT_L005_R1_001_(paired)_trimmed_(paired)_contig_3180	17.34	20.1	3.51	9.41	9.78	16.39	13.61
Mj_1_GCCAAT_L005_R1_001_(paired)_trimmed_(paired)_contig_3362	4.71	4.75	7.68	7.27	6.92	10.88	7.09
TR77865|c1_g5_i1	4.66	4.64	6.12	5.48	4.32	7.1	5.65
TR78550|c3_g2_i4	11.38	12.93	18.12	14.31	13.36	16.68	10.27
TR68507|c0_g1_i10	6.88	4.84	10.13	7.74	8.65	10.34	7.32
Mj_1_GCCAAT_L005_R1_001_(paired)_trimmed_(paired)_contig_10240	40.09	47.29	21.6	25.6	36.27	32.98	34.21
TR35581|c0_g1_i1	95.81	83.36	216.22	155.68	154.53	146.01	145.14
TR61480|c0_g1_i1	84.25	85.73	262.44	146.77	150.08	165.36	127.94
TR62354|c0_g1_i1	84.79	83.34	4.71	11.7	52.07	3.63	67.92
TR74027|c0_g1_i2	8.83	10.94	17.81	11.99	11.58	15.68	12.94
Mj_1_GCCAAT_L005_R1_001_(paired)_trimmed_(paired)_contig_12076	40.75	31.33	56.75	45.96	41.63	49.55	36.03
TR55661|c0_g1_i1	5.63	4.4	9.04	6.51	8.05	8.96	6.31
TR76312|c0_g1_i4	2.81	2.4	4.28	2.15	3.26	5.69	3.71
TR58125|c0_g1_i1	5.06	4.12	8.93	7.79	4.9	6.28	4.84
TR45721|c0_g1_i1	5.55	6.52	3.36	2.86	4.53	1.82	5.48
TR69698|c0_g2_i2	2.2	2.41	4.11	4.74	3.35	6.64	4.79
TR76732|c0_g1_i2	3.29	2.47	6.78	5.05	4.93	7.06	4.76
Mj_1_GCCAAT_L005_R1_001_(paired)_trimmed_(paired)_contig_1339	9.3	5.76	13.38	9.16	9.12	11.72	9.55
TR42395|c0_g1_i1	82.59	69.46	156.09	118.49	131.73	137.52	110.92
TR52807|c0_g1_i2	12.93	10.2	21.59	18.13	17.08	18.05	11.6
Mj_1_GCCAAT_L005_R1_001_(paired)_trimmed_(paired)_contig_1698	5.17	5.26	9.43	10.47	4.35	9.99	7.36
TR71762|c3_g1_i1	7.45	7.25	12.37	11.47	9.53	13.76	8.56
TR71762|c3_g1_i8	8.35	9.68	15.92	13.12	11.37	17.71	9.67
TR76189|c1_g1_i1	6.04	7.25	11.28	9.8	10.23	13.79	8.07
scaffold12736	5.45	6.75	11.67	9.9	8.73	10.27	7.11
Mj_1_GCCAAT_L005_R1_001_(paired)_trimmed_(paired)_contig_8008	4.68	4.67	7.69	7.23	6.31	13.12	5.3
TR71171|c0_g1_i1	6.11	7.29	11.57	8.72	10.34	17.05	8.78
TR66034|c1_g1_i2	8.74	7.71	3.81	3.95	7.76	3.36	6.6
TR67560|c0_g3_i4	2.42	2.22	3.47	3.86	3.84	5.56	3.62
Mj_1_GCCAAT_L005_R1_001_(paired)_trimmed_(paired)_contig_2299	6.08	6.63	45.8	55.83	18.36	57.98	7.89
TR67700|c0_g1_i1	4.31	3.45	9.31	7.58	8.56	16.15	5.42
TR53407|c0_g1_i4	3.78	4.28	6.54	5.26	3.72	5.65	2.8
TR72710|c1_g4_i2	10.13	10.48	20.31	20.79	18.18	17.56	14.47
Mj_1_GCCAAT_L005_R1_001_(paired)_trimmed_(paired)_contig_11619	7.63	6.64	11.6	8.77	12.17	14.41	10.34
TR54734|c0_g1_i1	2.09	1.88	9.56	6.65	4.42	6.84	3.28
TR54734|c0_g1_i2	2.19	2.21	6.22	3.89	4.82	5.58	2.54
TR78908|c1_g1_i1	1.78	2	9.5	6.5	4.56	5.25	2.79
Mj_1_GCCAAT_L005_R1_001_(paired)_trimmed_(paired)_contig_1144	37.9	32.6	64.69	51.1	52.31	63.9	43.19
TR62577|c0_g1_i3	54.72	48.74	5.78	13.02	62.17	7.9	62.2
Mj_1_GCCAAT_L005_R1_001_(paired)_trimmed_(paired)_contig_8287	26.59	17.35	47.48	37.67	31.69	30.33	24.19
TR64872|c0_g1_i1	20.66	16.54	43.53	31.67	27.59	27.53	19.28
TR71089|c1_g1_i2	9.72	7.94	6.09	5.47	8.43	5.57	10.04
TR60041|c0_g1_i1	8.65	13.57	20.91	8.77	6.98	19.18	9.06
TR76999|c0_g7_i1	15.04	14.84	27.61	30.11	17.34	21.43	17.24
TR79582|c0_g2_i2	9.13	8.86	15.02	14.93	15.02	24.11	15.35
TR78712|c1_g1_i2	7.57	7.11	4.33	4.18	3.78	2.11	5.91
TR70001|c1_g1_i1	6.73	6.48	8.78	5.53	6.71	8.5	8.3
TR46897|c0_g1_i1	11.22	9.56	19.66	18.25	15.2	18.11	13.58
Mj_1_GCCAAT_L005_R1_001_(paired)_trimmed_(paired)_contig_20449	4.11	4.25	10.08	8.2	9.31	13.57	6.6
TR68412|c0_g1_i3	2.36	3.16	4.26	4.23	4.88	5.68	4.01
TR47996|c0_g1_i2	12.56	9.41	17.35	17.28	12.28	13.36	14.08
TR76550|c0_g2_i4	6.79	6.71	2.14	3.85	5.08	4.31	7.9
TR78579|c0_g1_i4	7.02	7.81	4.05	4.95	5.17	4.21	7.08
TR67820|c0_g1_i2	2.46	3.39	5.3	4.12	4.08	3.94	2.96
scaffold14455	10.35	8.61	11.19	8.83	9.33	11.75	11.13
C935256	5.35	6.82	11.97	9.33	10.65	9.89	6.85
Mj_1_GCCAAT_L005_R1_001_(paired)_trimmed_(paired)_contig_1367	48.92	58.53	83.64	89	50.56	67.3	39.48
scaffold13983	75.03	92.76	134.27	135	76.59	100.13	64.09
Mj_1_GCCAAT_L005_R1_001_(paired)_trimmed_(paired)_contig_2004	4.8	4.69	10.5	9.71	8.39	14.71	7.04
TR75897|c0_g1_i1	6.03	5.82	12.23	11.58	9.06	15.05	8.73
TR76212|c0_g1_i3	3.33	3.84	9.64	8.31	5.9	10.12	6.16
TR76212|c0_g1_i4	3.9	3.93	7.89	7.1	6.17	10.44	6.74
Mj_1_GCCAAT_L005_R1_001_(paired)_trimmed_(paired)_contig_506	178.49	152.35	450.86	351.61	230.61	340.62	217.35
TR63757|c3_g1_i2	271.98	282.16	679.15	743.11	556.48	1018.15	285.68
TR58503|c0_g1_i1	24	27.03	87.6	65.49	52.75	56.87	43.53
TR63396|c0_g2_i3	6.49	5.79	10.5	7.48	6.44	9.31	7.22
TR64953|c0_g1_i7	5.66	4.44	9.33	6.26	6.1	8.32	6.19
TR70884|c0_g1_i1	23.01	23.08	45.91	38.62	25.67	35.3	34.08
TR73344|c0_g1_i2	13.08	10.14	94.27	66.14	44.07	63.49	47.72
Mj_1_GCCAAT_L005_R1_001_(paired)_trimmed_(paired)_contig_1039	142.29	113.94	306.7	222.76	204.9	244.46	127.98
TR51356|c0_g1_i1	3.38	3.49	6.3	5.81	7.79	9.7	5
TR66494|c3_g1_i1	7.86	7.7	3.15	4.84	3.31	2.92	5.18
TR77763|c0_g1_i5	28.28	23.85	36.89	32.89	29.77	38.67	30.53
TR63269|c0_g1_i2	0.37	0.36	5.85	4.54	2.05	6.49	0.25
TR63269|c0_g1_i3	0.11	0.31	5.06	2.39	0.8	4.66	0.21
TR55556|c0_g1_i2	4.16	5.71	7.34	7.03	5.29	5.89	5.54
TR71192|c0_g1_i1	7.87	8.64	14.64	11.17	14.02	16.67	11.03
TR75076|c0_g1_i3	1.81	3.23	4.92	2.51	3.89	5.53	3.01
TR59130|c0_g1_i2	4.66	4.58	9.36	6.53	7.38	7.61	4.05
TR72124|c0_g1_i1	0.76	0.18	5.15	1.21	1.14	3.16	1.69
TR75238|c0_g1_i1	122.69	112.94	248.47	215.61	199.02	178.21	139.35
TR47532|c0_g1_i1	32.9	34.85	77.2	48.01	41.73	61.45	37.16
TR45968|c0_g1_i1	16.17	13.4	30.25	27.63	18.24	24.1	22.13
TR77909|c1_g5_i1	8.35	5.32	16.6	10.88	13.02	15.01	10.6
TR65625|c2_g1_i4	0.24	0.11	47.85	23.11	25.03	24.98	4.37
TR65625|c2_g1_i7	0.24	0.11	43.49	21.94	18.48	19.3	4.07
TR66072|c1_g1_i2	7.93	7.35	11.75	11.33	8.22	13.35	9.46
TR37335|c0_g2_i1	96.24	74.23	198.32	121.58	195.72	166.92	154.32
TR58505|c0_g1_i1	1.89	8.26	30.36	12.38	16.87	13.26	7.23
TR50710|c1_g1_i2	17.38	13.86	30.69	27.2	16.7	34.59	16.25
coral1_Transcript	19751.6	18449	39987.5	33526.3	27645.1	36721	23258.4	Sum
coral1_Transcript	14.1487	13.2156	28.6444	24.016	19.8031	26.3045	16.6608	Average

## Sheet: TransM3
Table S11 Summary of transcript modules and the included transcripts using WCNA analysis for highly expressed transcripts in Mallotus japonicus.
Sequence_name	FPKM_Young_Leaf	FPKM_Mature_Leaf	FPKM_Young_Stem	FPKM_Mature_Stem	FPKM_Bark	FPKM_Central_Cylinder	FPKM_Inflorescence
Mj_1_GCCAAT_L005_R1_001_(paired)_trimmed_(paired)_contig_12934	3.21	1.84	1.7	3.56	2.16	6.58	2.53
TR68047|c0_g1_i7	7.56	7	3.98	2.01	3.89	3.55	5.24
TR50244|c0_g1_i1	9.89	18.29	9.21	0.36	0.34	0.25	14.71
TR77045|c3_g1_i6	3.82	2.62	5.06	5.7	8.59	6.91	2.48
TR70889|c1_g1_i1	3.71	3.92	5.24	4.2	2.23	2.3	4.64
TR76360|c0_g1_i1	3.2	8.02	4.08	0.42	3	0.44	4.74
TR76707|c3_g1_i1	2.95	2.26	1.86	5.49	4.1	4.57	3.27
Mj_1_GCCAAT_L005_R1_001_(paired)_trimmed_(paired)_contig_84	156.09	168.9	134.79	23.57	27.66	5.3	73.71
Mj_1_GCCAAT_L005_R1_001_(paired)_trimmed_(paired)_contig_37070	0.67	0.43	0.79	3.43	4.45	8.97	0.58
TR79230|c1_g1_i7	4.72	4.38	5.19	5.13	5.35	7.22	5.99
TR79230|c1_g1_i9	4.32	3.13	4.77	4.42	5.27	5.84	5.08
Mj_1_GCCAAT_L005_R1_001_(paired)_trimmed_(paired)_contig_24984	0	0.03	0.04	6.57	3.04	9.76	0.35
TR55301|c0_g1_i2	0	0.1	0.13	5.46	3.65	9.95	0.36
TR55301|c0_g1_i8	0.22	0	0	5.65	3.32	6.91	0
TR69770|c0_g1_i3	1.9	1.03	1.81	5.76	4.62	8.88	2.95
TR71383|c2_g3_i7	3.03	1.85	3.57	3.59	5.48	5.02	3.84
TR63359|c1_g1_i3	2.93	2.3	3.14	5.06	2.77	5.88	1.84
Mj_1_GCCAAT_L005_R1_001_(paired)_trimmed_(paired)_contig_805	15.67	15.59	21.78	35.76	23.22	35.05	22.77
TR72710|c0_g1_i1	7.36	8.41	14.92	22.33	17.67	17.41	11.87
Mj_1_GCCAAT_L005_R1_001_(paired)_trimmed_(paired)_contig_1296	46.1	38.74	46.81	43.27	49.83	53.51	49.68
TR63466|c0_g1_i1	16.45	14.36	17.9	18.8	16.45	36.19	18.25
TR63466|c0_g1_i4	14.78	11.83	15.85	19.9	21.91	28.35	18.14
Mj_1_GCCAAT_L005_R1_001_(paired)_trimmed_(paired)_contig_6702	4.66	6.69	5.23	11.91	1.07	43.49	4.55
TR69858|c0_g1_i1	3.51	5.13	5.03	10.35	1.42	36.48	3.65
Mj_1_GCCAAT_L005_R1_001_(paired)_trimmed_(paired)_contig_67565	0	0.53	21.4	28.55	30.07	23.06	2.41
TR57340|c0_g2_i1	0.09	0.53	30.54	33.14	47.14	30.55	5.05
TR57170|c0_g1_i1	0	0	1.05	113	207.36	114.65	7.15
TR57286|c0_g1_i2	12.72	16.83	10.08	4.3	5.7	4	12.57
Mj_1_GCCAAT_L005_R1_001_(paired)_trimmed_(paired)_contig_4909	2.74	10.63	10.08	19.16	23.2	37.61	15.21
TR69345|c0_g3_i8	2.88	3.68	2.26	2.65	4.99	5.3	3.3
scaffold12365	10.44	13.5	11.73	43.66	23.45	51.14	31.05
Mj_1_GCCAAT_L005_R1_001_(paired)_trimmed_(paired)_contig_8952	13.41	17.24	49.9	113.53	204.03	378.36	113.89
Mj_1_GCCAAT_L005_R1_001_(paired)_trimmed_(paired)_contig_691	102.31	112.79	255.08	279.88	446.79	531.32	306.8
Mj_1_GCCAAT_L005_R1_001_(paired)_trimmed_(paired)_contig_1479	42.15	64.72	23.02	54.5	22.73	89.15	18.75
TR71743|c0_g1_i1	68.74	114.9	48.6	96.08	44.36	163.28	31.83
TR78259|c3_g2_i2	0.9	1.29	2.39	5.7	5.03	53.78	2.44
TR78413|c0_g7_i3	1.06	1.92	1.24	2.44	6.33	9.93	2.94
TR68890|c2_g1_i13	6.62	5.42	6.42	4.69	6.26	3.28	6.54
Mj_1_GCCAAT_L005_R1_001_(paired)_trimmed_(paired)_contig_23723	3.58	2.05	5.27	4.26	6.95	7.94	6
Mj_1_GCCAAT_L005_R1_001_(paired)_trimmed_(paired)_contig_3109	5.8	3.85	4.12	12.82	10.94	19.6	5.14
TR73609|c2_g1_i5	3.16	2.61	2.5	3.32	2.16	8.19	3.54
scaffold12804	9.06	3.91	10.92	16.26	15.53	21.07	12.55
Mj_1_GCCAAT_L005_R1_001_(paired)_trimmed_(paired)_contig_3378	21.55	20.6	35.04	76.8	62.29	177.17	48.87
TR77849|c2_g2_i2	23.83	21.38	36.48	84.23	70.81	178.17	49.76
Mj_1_GCCAAT_L005_R1_001_(paired)_trimmed_(paired)_contig_7348	18.4	14.24	18.37	12.94	13.03	7.07	18.49
TR61044|c0_g1_i2	6.48	7.22	5.81	3.52	1.99	2.63	3.2
Mj_1_GCCAAT_L005_R1_001_(paired)_trimmed_(paired)_contig_388	0.74	0.24	0.58	1.17	1.46	9.77	1.21
Mj_1_GCCAAT_L005_R1_001_(paired)_trimmed_(paired)_contig_419	20.23	24.34	13.04	7.98	10.22	8.16	19.19
TR54846|c0_g1_i1	26.76	25.91	15.67	14.03	14.01	9.96	20.54
TR53003|c0_g1_i2	2.71	2.11	3.04	5.67	6.27	4.79	5.95
TR50574|c0_g1_i2	62.91	36.97	86.68	74.08	115.36	100.08	63.2
Mj_1_GCCAAT_L005_R1_001_(paired)_trimmed_(paired)_contig_12144	0.5	0.95	1.37	3.7	5.22	6.65	1.15
TR65647|c0_g1_i1	2.1	1.12	2.2	2.21	3.13	6.45	0.92
TR75777|c0_g2_i7	2.27	1.75	4	5.3	5.85	6.71	5.32
TR58609|c0_g1_i1	1.64	1.34	2.48	8.14	14.28	12.41	1.61
TR47442|c0_g1_i1	18.52	11.51	7.27	44.34	80.9	83.73	22.61
TR72710|c1_g4_i1	17.74	19.49	37.85	39.77	39.29	35.83	27.29
TR69703|c0_g1_i1	5.36	2.9	7.78	10.48	13.34	9.71	8.28
TR69703|c0_g1_i2	6.02	3.45	9.32	9.28	16.45	13.55	9.66
Mj_1_GCCAAT_L005_R1_001_(paired)_trimmed_(paired)_contig_12839	12.33	11.74	10.34	9.68	10.65	8.57	13.18
Mj_1_GCCAAT_L005_R1_001_(paired)_trimmed_(paired)_contig_102367	0	0	0	0.28	0	16.5	0
Mj_1_GCCAAT_L005_R1_001_(paired)_trimmed_(paired)_contig_23485	8.54	7.65	5.94	1.23	2.13	4.17	4.85
TR64532|c3_g1_i1	0.19	1.1	0.9	3.94	4.28	12.93	0.38
TR58003|c0_g1_i2	5.2	5.41	4.29	2.29	1.98	0.87	2.07
Mj_1_GCCAAT_L005_R1_001_(paired)_trimmed_(paired)_contig_3910	47.34	48.17	47.4	47.49	53.13	60.96	37.13
scaffold11686	35.52	34.55	34.71	37.7	34.74	44.69	26.53
C928286	2.64	2.91	2.39	4.5	3.03	7.42	2.4
TR63910|c0_g2_i1	19.17	14.51	25.32	33.48	27.63	31.43	19
TR63910|c0_g2_i3	15.57	11.83	14.12	23.17	18.88	22.41	13.93
TR79475|c1_g1_i3	11.26	10.62	13.74	14.44	13.4	19.45	9.77
Mj_1_GCCAAT_L005_R1_001_(paired)_trimmed_(paired)_contig_11872	4.5	4.32	5.01	0.79	2.23	2.49	1.97
TR75239|c1_g1_i7	4.8	4.9	10.72	13.13	17.07	23.88	6.53
TR72544|c1_g1_i1	11.08	9.42	13.16	19.14	14.75	16.24	15.54
TR68159|c0_g1_i1	23.73	23.04	10.58	10.67	12.19	11.77	17.91
TR59403|c0_g1_i2	13.5	8.92	10.88	12.84	12.27	15.95	13.28
TR67083|c1_g1_i2	15.6	12.43	20.56	31.66	21.45	32.79	14.29
Mj_1_GCCAAT_L005_R1_001_(paired)_trimmed_(paired)_contig_25046	1.46	1.48	2.06	4.18	8.76	7.59	4.9
Mj_1_GCCAAT_L005_R1_001_(paired)_trimmed_(paired)_contig_8061	5.89	6.56	4.25	13.7	9.93	17.5	7.22
Mj_1_GCCAAT_L005_R1_001_(paired)_trimmed_(paired)_contig_20606	3.07	1.59	1.94	3.49	3.79	5.97	3.56
TR79259|c0_g1_i1	3.74	2.8	3.07	6.8	6.81	10.04	4.17
TR60358|c0_g1_i2	3.32	8.04	3.21	9.98	12.15	19.3	12.17
Mj_1_GCCAAT_L005_R1_001_(paired)_trimmed_(paired)_contig_22735	4.67	2.04	3.88	4.7	3.74	5.52	2.04
TR77408|c0_g1_i3	21.95	18.96	20.07	27.69	15.23	41.42	22.94
TR79726|c0_g1_i1	4.04	3.92	4.47	9.41	6.66	13.93	5.35
TR63213|c0_g1_i1	3.56	3.32	4.5	4.97	4.52	5.56	2.53
TR63213|c0_g1_i2	3.66	3	4.16	5.44	3.72	6.14	2.11
TR63213|c0_g1_i3	3.63	2.62	4.13	4.76	4.32	6.16	2.2
Mj_1_GCCAAT_L005_R1_001_(paired)_trimmed_(paired)_contig_12612	2.85	2.72	2.75	3.09	5.05	4.76	3.84
Mj_1_GCCAAT_L005_R1_001_(paired)_trimmed_(paired)_contig_5619	24.08	18.7	41.95	68.35	68.9	65.2	39.04
Mj_1_GCCAAT_L005_R1_001_(paired)_trimmed_(paired)_contig_7901	1.48	1.43	3.64	7.51	1.16	10.98	2.73
TR73788|c0_g4_i4	4.57	4.94	6.1	4.04	3.2	2.49	6.02
TR71941|c0_g1_i2	4.69	2.95	5.35	6.26	6.21	5.92	3.81
TR75145|c3_g2_i19	4.45	2.89	4.7	4.84	4.11	5.42	3
scaffold10306	5.09	5.09	4.18	7.11	7.67	11.59	6.43
scaffold10307	3.6	5.2	4.39	5.23	6.84	10.55	7.15
Mj_1_GCCAAT_L005_R1_001_(paired)_trimmed_(paired)_contig_12955	3.5	2.55	4.25	4.1	4.33	8.03	5.19
TR72626|c1_g3_i2	3.59	1.55	2.92	3.81	3.21	5.34	3.8
TR72626|c1_g3_i7	4.48	2.19	2.84	3.38	5.14	6.38	4.25
TR66993|c0_g1_i5	2.83	2.04	2.58	3.42	3.71	6.22	3.38
TR72813|c0_g1_i4	2.91	2.73	4.67	4.64	4.44	5.66	3.09
TR75765|c0_g1_i3	3.83	3.59	3.77	4.86	6.23	5.71	4.25
TR78006|c0_g1_i2	6.07	3.32	3.83	2.35	4.19	0.64	6.27
TR48256|c0_g1_i1	7.38	9.12	6.44	3.39	6.37	4.99	7.26
Mj_1_GCCAAT_L005_R1_001_(paired)_trimmed_(paired)_contig_13502	10.82	7.06	8.29	15.52	16.93	21.52	13.71
Mj_1_GCCAAT_L005_R1_001_(paired)_trimmed_(paired)_contig_22489	1.5	2.16	2.91	4.72	10.31	9.38	6.46
TR58626|c0_g1_i3	5.06	4.58	2.45	1.03	0.78	0	3.2
TR79449|c0_g1_i2	3.08	5.45	5.75	4.82	4.92	9.25	3.5
TR69051|c1_g1_i2	3.83	2.09	2.53	3.34	7.64	8.01	3.99
Mj_1_GCCAAT_L005_R1_001_(paired)_trimmed_(paired)_contig_21319	0.76	0.41	2.19	39.59	48.45	28.37	13.01
TR68963|c0_g1_i1	1.03	0.71	2.77	50.95	69.7	37.99	14.18
Mj_1_GCCAAT_L005_R1_001_(paired)_trimmed_(paired)_contig_6009	2.64	3.12	5.01	3.43	5.88	5.73	4.98
TR51339|c1_g1_i1	36.58	44.63	140.18	183.72	197.09	130.42	63.77
TR63359|c1_g1_i1	2.26	0.65	1.59	5.36	2.69	5.74	1.33
Mj_1_GCCAAT_L005_R1_001_(paired)_trimmed_(paired)_contig_16498	2.23	0.84	1.31	2.14	3.35	5.06	1.41
TR78513|c0_g1_i3	0.76	1.06	1.61	3.71	5.94	5.26	4.31
TR78929|c0_g3_i1	0.94	0.84	1.56	2.69	5.02	3.93	3.44
TR78929|c0_g3_i4	1.21	0.9	1.81	3.44	5.15	4.44	3.46
TR78496|c0_g1_i2	8.12	8.33	8.02	11.81	9.66	18.76	10.09
scaffold11865	13.74	11.61	9.36	12.41	12.4	23.92	7.93
TR56805|c0_g1_i1	35.83	35.14	50.64	59	72.89	61.13	50.26
scaffold14200	10.57	13.06	16.87	21.63	29.17	25.85	19.73
TR70333|c2_g1_i2	0.67	0.49	2.62	16.49	0	39.04	1.18
scaffold12219	1.45	1.25	3.94	7.27	6.73	6.74	1.71
Mj_1_GCCAAT_L005_R1_001_(paired)_trimmed_(paired)_contig_25887	5.69	2.17	3.35	7.11	7.8	10.05	4.89
TR64027|c0_g1_i1	13.6	11.28	9.04	4.42	8.24	5.63	8.6
TR66881|c1_g1_i2	12.08	9.13	9	4.49	5.85	4.34	6.17
Mj_1_GCCAAT_L005_R1_001_(paired)_trimmed_(paired)_contig_9948	7.46	6.92	10.85	13.99	13.38	11.12	10.47
TR74846|c0_g1_i2	13.35	10.75	13.11	14.1	15.54	18.38	16.69
TR60306|c2_g1_i2	2.62	3.67	4.78	5.04	5.89	8.6	4.08
TR75813|c2_g1_i3	2.74	2.02	3.73	5.35	4.72	6.07	3.53
TR61011|c0_g3_i5	1.84	1.17	1.92	4.53	6.4	7.92	1.41
TR68167|c1_g1_i6	5.46	5.79	4.06	1.36	0.43	0.63	5.64
TR62295|c4_g2_i5	386.31	349.59	533.56	499.3	277.46	165.69	518.03
Mj_1_GCCAAT_L005_R1_001_(paired)_trimmed_(paired)_contig_71551	0.98	0.7	2.88	9.67	13.1	8.91	0.72
TR52344|c0_g1_i1	21.65	18.14	41.25	63.43	78.82	62.9	44.15
TR68159|c0_g1_i2	18.29	18.83	7.27	9.44	5.81	8.54	15.38
TR62730|c1_g1_i3	2.01	2.18	3.13	4.66	5.49	8.77	3.71
TR62730|c1_g2_i1	4.24	3.12	4.42	3.88	5.12	5.79	4.18
TR77325|c3_g2_i1	4.37	5.35	6.38	6.38	3.92	3.1	5.17
TR69337|c0_g1_i3	2.34	0.16	3.54	5.83	9.98	7.22	5.43
TR76360|c0_g1_i2	5.12	8.39	4.52	1.16	3.55	1.22	6.3
TR74649|c0_g1_i3	1.2	1.97	0.4	4.89	5.12	7.03	1.35
Mj_1_GCCAAT_L005_R1_001_(paired)_trimmed_(paired)_contig_16464	1.38	1.98	0.49	3.96	2.48	5.23	1.64
TR59739|c0_g1_i2	16.73	15.07	16.22	7.48	12.33	7.63	11.63
TR61701|c0_g1_i2	0.37	0.26	0.98	5.88	0.28	4.42	0
TR64263|c0_g1_i1	0.17	0.22	0.6	5.97	0.17	4.37	0.56
TR74294|c1_g1_i6	2.15	4.33	4.05	18.06	10.58	37.62	10.17
Mj_1_GCCAAT_L005_R1_001_(paired)_trimmed_(paired)_contig_5264	13.78	10.97	15.51	18.77	17.14	21.65	17.46
TR57101|c0_g1_i2	3.55	3.58	3.44	5.31	9.07	9.75	7.21
TR58612|c0_g1_i1	3.09	2.27	2.66	3.78	3.2	7.27	3.99
TR55225|c0_g1_i2	4.54	3.88	5.35	3.01	4.54	2.42	5.33
C974508	0	0.23	0.22	2.91	2.84	5.17	1.27
TR75553|c0_g1_i3	26.05	41.63	22.67	14.4	17.72	3.97	41.53
TR72495|c1_g1_i1	5.12	4.22	4.53	3.92	6.98	6.6	5.33
TR72495|c1_g1_i2	4.86	4.78	5.18	5.28	6.05	6.64	5.05
Mj_1_GCCAAT_L005_R1_001_(paired)_trimmed_(paired)_contig_1744	42.33	40.9	21.09	4.26	6.11	2.55	38.9
TR58964|c1_g1_i1	58.8	57.1	31.46	4.68	7.12	1.94	63.01
TR58964|c1_g1_i2	60.45	59.54	33.37	5.44	8.77	2.21	61.82
TR73307|c0_g1_i1	3.34	2.42	3	6.65	4.65	6.88	3.95
TR73307|c0_g1_i3	2.83	2.05	3.39	6.61	5.48	6.92	3.52
TR74084|c0_g1_i3	3.21	2.38	2.71	6.97	3.85	7.74	3.77
scaffold10421	2.89	2.49	2.53	5.48	4.28	6.71	3.03
scaffold10422	2.03	1.71	2.34	5.23	4.41	6.86	3.13
TR55427|c0_g1_i1	14.06	16.76	16.35	25.88	26.96	31.56	13
Mj_1_GCCAAT_L005_R1_001_(paired)_trimmed_(paired)_contig_6551	10.59	6.25	5.17	19.62	15.37	53.45	12.31
TR71165|c0_g5_i1	2.47	2.35	1.98	3.3	4.6	7.04	2.64
TR67369|c2_g1_i2	1.36	1.95	2.66	3.22	3.03	5.25	1.34
TR65372|c2_g1_i1	3.64	4.29	37.52	56.79	68.86	38.97	16.17
Mj_1_GCCAAT_L005_R1_001_(paired)_trimmed_(paired)_contig_80735	0	0.13	0.96	6.5	1.43	10.16	0.4
TR51001|c0_g1_i1	0	0	0.32	4.12	1.84	6.68	0.13
Mj_1_GCCAAT_L005_R1_001_(paired)_trimmed_(paired)_contig_13223	6.98	7.02	11.87	31.37	15.84	26.63	8.05
Mj_1_GCCAAT_L005_R1_001_(paired)_trimmed_(paired)_contig_59687	0.35	0.11	0.97	7.64	6.68	8.35	3.7
Mj_1_GCCAAT_L005_R1_001_(paired)_trimmed_(paired)_contig_9237	3.87	2.23	1.46	5.85	3.6	6.68	2.93
TR76529|c0_g3_i2	3.97	2.62	2.29	6.39	4.75	6.74	3.12
scaffold10599	5.54	3.25	3.12	6.22	5.42	8.38	3.83
TR79730|c2_g2_i1	9.62	7.98	7.51	2.8	5.67	2.75	8.93
TR73785|c0_g1_i1	0	0.1	0.31	9.28	15.43	23.5	3.12
TR75425|c0_g1_i2	0.13	0	0.31	2.11	7.37	10.5	1.58
TR75425|c0_g1_i6	0	0	0.08	3.52	4.6	8.9	0.92
TR44290|c0_g1_i1	1.15	0.55	3.73	6.82	1.28	3.17	2.26
TR79129|c4_g1_i1	3.7	3.62	4.82	6.67	6.89	5.67	3.75
TR73221|c0_g3_i9	0.74	0.88	1.3	2.92	4.96	5.32	2.91
Mj_1_GCCAAT_L005_R1_001_(paired)_trimmed_(paired)_contig_11003	10.74	10.03	19.16	28.98	26.83	35.25	24.63
Mj_1_GCCAAT_L005_R1_001_(paired)_trimmed_(paired)_contig_17112	6.52	18.66	4.76	114.54	67.14	263.45	21.1
Mj_1_GCCAAT_L005_R1_001_(paired)_trimmed_(paired)_contig_1617	71.73	57.68	89.11	114.56	83.25	143.28	76.21
Mj_1_GCCAAT_L005_R1_001_(paired)_trimmed_(paired)_contig_880	117.98	86.78	239.07	502.33	763.99	1621.67	387.89
Mj_1_GCCAAT_L005_R1_001_(paired)_trimmed_(paired)_contig_16514	4.86	4.48	10.43	15.6	18.71	13.02	12.86
Mj_1_GCCAAT_L005_R1_001_(paired)_trimmed_(paired)_contig_11105	18.19	17.47	21.97	32.75	26.46	32.4	16.71
TR73908|c1_g1_i1	12.32	9.49	13.02	29.34	23.25	30.32	20.44
TR73908|c1_g1_i2	5.85	4.92	10.17	23.91	22.31	23.38	9.62
TR73908|c1_g1_i4	8.24	8.29	10.4	25.94	24.66	25.34	12.49
TR76218|c3_g5_i2	0	0	0.99	3.21	0	13.29	0.17
scaffold12697	7.39	6.5	6.63	10.4	8.37	16.58	8.69
scaffold13097	3.72	2.43	4.63	9.06	5.25	10.08	4.83
TR48421|c0_g1_i2	31.49	32.6	52.17	92.69	84.14	68.33	53.24
TR60767|c0_g1_i1	39.87	50.36	37.78	25.19	21.63	24.12	32.96
TR69653|c0_g1_i4	0.85	0.68	1.84	4.07	5.11	5.06	2.95
TR60359|c0_g1_i1	48.86	56.39	42.02	14	21.36	10.26	30.93
TR60359|c0_g1_i2	75.29	80.36	66.52	18.97	22.51	9.82	50.35
TR63043|c0_g1_i1	23.83	16.96	14.41	24.57	21.17	27.81	19.37
TR75084|c2_g4_i1	9.02	6.86	8.3	5.15	9.28	5.95	9.32
TR72754|c2_g5_i2	2.53	0.97	3.88	4.81	4.52	5.88	2.74
TR68827|c0_g2_i4	2.22	2.52	2.03	3.73	2.13	5.57	2.5
scaffold12709	4.01	3.01	4.41	5.29	4.03	5.7	3.82
TR60138|c0_g1_i1	2.01	2.51	3.55	6	5.38	4.69	6.95
TR60138|c0_g1_i3	12.22	16.09	8.94	3.75	4.66	2.4	11.72
TR59413|c0_g1_i2	4.9	3.21	6.61	11.37	10.41	18.98	4.94
TR75040|c0_g1_i2	5.68	5.59	8.55	17.94	10.62	28.64	6.53
TR66828|c0_g1_i1	18.7	5.32	19.26	25.91	12.65	28.09	8.29
TR79693|c0_g1_i3	2.11	2.02	1.78	5.03	5.19	7.2	2.53
TR68756|c0_g3_i7	0.32	0	3.82	3.44	0	16.03	0.38
TR1140|c0_g1_i1	0.13	0	0.31	0	0	5.87	0
TR74100|c1_g1_i1	1.12	1.06	1.78	5.69	5.8	6.8	4.06
TR74100|c1_g1_i3	1.12	0.9	2.69	6.74	6.62	8.77	4.82
TR74100|c1_g1_i7	1.02	1.18	2.66	8.96	7.66	9.19	5.3
TR77224|c0_g1_i5	9.69	14.27	15.92	17.7	24.18	18.81	19.39
Mj_1_GCCAAT_L005_R1_001_(paired)_trimmed_(paired)_contig_19132	2.01	6.01	4.73	15.86	7.83	39.05	9.13
TR74654|c0_g1_i5	1.8	3.39	4.91	5.28	6.17	5.43	3.2
TR74654|c0_g1_i6	1.99	3.34	5.63	5.2	5.67	4.29	3.23
TR76490|c0_g1_i2	9.8	6.16	9.16	12.48	11.24	11.17	6.96
TR72680|c0_g2_i1	0.34	2.77	0.72	2.08	1.79	5.09	1.33
C951890	0	0.11	0	0.57	0	14.72	0
TR55893|c0_g1_i2	0	0.07	0.13	7.95	2.92	10.9	0.62
TR55893|c0_g1_i4	0.07	0	0.09	6.32	3.43	8.78	0.33
TR55893|c0_g1_i9	0.04	0.04	0.14	6.19	3.27	9.41	0.38
TR67868|c0_g1_i5	2.82	3.14	4.07	6.79	5.68	6	6.58
TR64167|c0_g3_i1	0.71	0.97	2.15	4.2	8.98	6.78	2.61
TR67321|c1_g1_i2	1.62	1.83	3.3	3.28	5.07	3.77	3.34
TR48421|c0_g1_i1	43.38	50.02	81.5	129.07	123.03	116.65	82.02
scaffold14293	16.82	19.04	32.23	51.97	48.29	41.63	28.32
Mj_1_GCCAAT_L005_R1_001_(paired)_trimmed_(paired)_contig_20165	13.26	12.3	20.98	26.32	24.04	29.36	14.46
TR70405|c0_g1_i1	19.72	15.11	38.79	44.06	35.91	50.29	20.58
Mj_1_GCCAAT_L005_R1_001_(paired)_trimmed_(paired)_contig_2068	14.75	14.16	15.27	5.82	5.96	6.52	11.16
TR56633|c0_g1_i2	1.62	1.03	2.54	10.52	6.67	7.96	1.2
TR56995|c1_g1_i1	3.09	1.48	0.91	8.27	11.25	9.42	1.71
C907612	0	0	0	0.45	0	5.62	0
Mj_1_GCCAAT_L005_R1_001_(paired)_trimmed_(paired)_contig_2124	178.64	180.08	532.95	518.13	513.37	517.76	276.75
TR54562|c0_g1_i1	147.51	131.08	412.8	391.77	384.42	384.99	210.31
scaffold11489	2.29	1.29	2.7	8.14	7.67	13.79	4.66
Mj_1_GCCAAT_L005_R1_001_(paired)_trimmed_(paired)_contig_80513	0	0.24	0	0.4	0	10.25	0
TR113773|c0_g1_i1	9.84	10.05	4.38	2.77	4.56	1.93	6.89
TR74294|c1_g1_i4	7.08	7.09	7.65	20.02	13.57	46.81	13.34
Mj_1_GCCAAT_L005_R1_001_(paired)_trimmed_(paired)_contig_9032	2.37	4.59	11.54	31.96	34.57	32.41	8.64
scaffold13941	1.83	2.67	7.77	22.96	23.78	21.27	4.93
TR88387|c0_g1_i1	0	0.25	0	0.41	0	5.4	0
TR52551|c0_g1_i3	4.22	2.22	3.96	2.06	2.07	0.29	6.56
TR54745|c1_g2_i3	6.09	6.11	5.86	3.06	3.29	1.83	5.44
TR112134|c0_g1_i1	0.28	0.26	0.97	1.74	0.41	22.14	0
TR67400|c0_g1_i1	7.23	6.04	12.06	61.29	5.86	70.63	8.33
TR74895|c1_g3_i2	2.21	4.34	10.24	7.01	13.8	20.78	4.87
TR71326|c1_g2_i2	7.14	5.67	6.96	10.96	12.61	16.25	11.57
TR71761|c0_g1_i4	2.11	0.77	11.3	15.47	16.74	15.37	8.58
scaffold13822	1.35	0.55	8.14	8.59	9.12	8.02	4.31
scaffold13823	1.2	0.4	8.19	9.12	9.3	8.51	4.43
TR63466|c0_g1_i3	63.64	44.73	62.03	73.48	65.67	84.95	47.08
scaffold10027	44.24	29.94	38.85	51.74	41.64	58.95	30.24
TR75423|c0_g1_i2	13.94	10.86	12.96	4.85	4.47	5.15	12.93
scaffold14238	8.97	6.86	8.09	3.19	2.9	3.07	7.98
TR66652|c1_g2_i4	2.75	3.15	2.28	5.6	4.52	4.38	3.83
TR62745|c0_g1_i4	7.69	5.11	5.72	3	2.83	4.85	6.45
TR61156|c0_g1_i1	13.41	12.16	20.78	50.73	32.35	53.06	22.36
TR69891|c0_g1_i1	0.04	0.04	1.67	3.3	0.35	5.96	0.15
TR70272|c0_g1_i3	0.12	0	1.22	2.73	0.18	5.29	0.16
Mj_1_GCCAAT_L005_R1_001_(paired)_trimmed_(paired)_contig_12327	19.46	15.62	37.75	32.61	45.18	42.49	28.19
TR48264|c0_g1_i1	37.4	29.79	82.92	68.54	98.86	87.61	63.24
scaffold11123	10.79	10.05	28.59	22.05	33.66	35.7	24.85
scaffold11837	38.73	21.83	45.72	55.38	56.63	77.87	45.74
TR47165|c0_g1_i1	248.6	163.89	237.2	307.12	263.62	246.53	197.99
TR54186|c0_g1_i1	1.25	0	0.49	24.08	53.71	28.12	30.55
TR106792|c0_g1_i1	0	0	0	0	0	8.85	0
TR49167|c0_g1_i2	1.6	1.53	1.49	5.64	4.43	5.36	1.25
TR61147|c1_g1_i2	72.06	49.45	112.07	158.09	189.71	276.59	95.04
TR51547|c0_g1_i2	7.93	7.28	9	8.76	15.67	13.62	7.98
Mj_1_GCCAAT_L005_R1_001_(paired)_trimmed_(paired)_contig_7125	7.94	7.5	7.27	10.91	13.36	15.87	8.32
TR75170|c1_g1_i3	1.32	1.75	4.85	4.68	4.55	5.83	2.51
TR79535|c0_g2_i5	4.66	3.16	3.52	4.88	5.55	10.82	3.39
TR69828|c0_g1_i6	2.88	2.51	4.01	5.37	5.83	7.51	1.8
Mj_1_GCCAAT_L005_R1_001_(paired)_trimmed_(paired)_contig_44738	0.18	0	0	2.3	1.63	5.64	0.18
TR61917|c0_g1_i3	1.75	4.7	3.35	7.49	5.42	8.17	5.19
TR63359|c1_g1_i2	2.48	3.46	0.8	3.21	2.35	5.49	2
TR66807|c0_g1_i1	10.1	8.59	12.15	9.67	15.63	18.61	11.04
TR68295|c1_g2_i3	4.97	5.22	4.69	2.76	2.26	1.8	4.34
TR67369|c2_g1_i1	3.76	3.59	6.65	8.19	10.99	11.25	5.38
scaffold10616	2.44	3.84	5.75	7.93	11.13	11.46	3.88
TR71173|c1_g1_i1	2.48	2.74	2.02	3.02	2.56	6.76	1.5
TR63783|c0_g1_i1	3.62	7.3	8.31	43.14	51.76	54.53	24.03
TR63783|c0_g1_i3	3.12	6.05	7.04	32.46	39.51	45.6	19.46
TR55094|c0_g1_i2	5.07	5.04	4.57	14.58	11.32	16.45	5.11
TR59605|c0_g1_i3	1.85	1.7	0.97	4.16	2.68	7.1	1.45
TR59605|c0_g1_i4	2.37	2.81	0.55	5.08	2.26	7.82	1.37
TR60126|c0_g4_i3	1.59	1.64	0.65	2.86	2.28	6	1.84
TR78034|c0_g1_i6	3.75	2.87	4.16	3.87	4.86	6.73	3.78
Mj_1_GCCAAT_L005_R1_001_(paired)_trimmed_(paired)_contig_10509	17.84	15.21	16.27	13.52	17.7	21.16	15.27
Mj_1_GCCAAT_L005_R1_001_(paired)_trimmed_(paired)_contig_3082	8.6	8.31	9.81	9.05	9.89	15.09	11.98
TR79204|c1_g1_i7	2.26	1	3.07	3.58	10.11	6.16	6.16
TR74712|c0_g1_i6	2.39	1.8	1.29	3.8	5.67	4.43	1.57
TR71623|c1_g2_i1	124.09	234.63	204.14	87.39	23.93	37.66	37.57
TR76615|c0_g5_i1	1.96	2.12	2.6	5.04	4.38	4.33	2.89
scaffold11478	0.42	0	2.31	2.67	6.07	10.42	4.28
Mj_1_GCCAAT_L005_R1_001_(paired)_trimmed_(paired)_contig_23497	6.89	4.3	6.3	9.75	5.01	10.94	4.88
TR64575|c0_g3_i2	2.59	2.23	1.84	4.63	0.38	16.79	1.95
TR63719|c0_g1_i2	14.93	10.21	5.65	6.37	7.01	4.24	13.3
TR63915|c1_g1_i4	13.45	10.35	5.17	4.33	5.65	3.58	11.43
TR50638|c0_g1_i2	7.5	4.12	6.39	8.61	7.39	9.74	6.76
TR73311|c2_g1_i2	2.54	2.63	2.62	4.72	6.51	11.32	5.55
TR73311|c2_g1_i7	2.41	3.36	3.97	9.46	6.63	15.75	7.77
TR55084|c0_g1_i3	6.58	5.98	7.39	10.94	6.87	9.54	4.23
TR72658|c0_g2_i1	4.57	3.06	4.56	8.84	9.57	16.44	5.77
TR73645|c0_g2_i1	4.1	3.26	3.57	7.6	6.87	14.34	4.25
TR73645|c0_g2_i2	3.64	3.9	4.22	7.6	6.62	10.7	4.56
TR73645|c0_g2_i4	3.54	1.8	3.55	6.67	7.14	11.52	3.97
TR78953|c0_g2_i2	1.76	1.51	3.31	5.3	5.25	5.26	1.39
TR72566|c2_g1_i3	4.34	2.75	3.46	3.3	6.01	4.79	4.19
TR79610|c1_g1_i5	2.55	3.43	2.41	2.83	4.56	5.64	4.27
TR78259|c3_g2_i11	0.31	3.42	1.46	2.96	6.51	6.73	3.37
TR78259|c3_g2_i7	1.26	3.74	2.23	3.22	4.54	20.1	3.87
TR78259|c3_g2_i9	1.38	4.61	2.44	2.85	8.88	15.64	3.4
TR66806|c0_g1_i2	2.58	1.03	0.78	7.56	5.68	18.69	6.82
TR67484|c1_g1_i2	4.35	4.32	8.81	7.65	9.9	7.71	3.04
TR76839|c0_g1_i2	2.18	2.17	2.59	5.99	6.39	9.57	3.36
TR76933|c1_g1_i11	1.85	0.93	1.66	4.34	4.15	5.6	2.26
scaffold11103	0.97	1.09	1.66	4.07	3.17	5.3	1.65
TR58983|c0_g1_i1	9.46	9.33	20.64	27.85	30.42	34.05	19.33
TR78805|c0_g1_i1	8.5	5.71	4.61	9.21	4.98	11.78	7.77
TR72118|c1_g2_i4	86.51	63.07	120.15	192.79	148.39	170.99	86.23
TR76646|c0_g1_i2	11.29	9.36	10.99	20.62	26.85	36.03	20.73
TR69877|c0_g3_i3	2.81	1.59	0.61	3.31	2.81	8.57	1.23
TR69877|c0_g3_i4	2.44	1.07	0.77	2.09	2.39	8.77	1.39
TR61540|c1_g1_i2	9.97	7.38	11.06	14.99	11.74	15.64	9.61
TR61540|c1_g1_i3	8.16	7.17	10.72	12.97	10.48	16.8	9.65
TR61540|c2_g1_i1	10.08	8.34	12.23	14.01	11.45	15.96	9.08
TR61540|c2_g1_i2	8.67	7.47	10.12	12.47	11.38	16.2	8.72
scaffold11600	9.2	7.06	11.08	12.2	10.58	15.16	9.56
TR79192|c0_g3_i1	2.73	1.68	1.61	2.78	5.24	5.84	2.69
TR72000|c0_g1_i5	3	3.14	3.03	3.41	5.99	7.15	4.66
TR68252|c0_g1_i2	2.8	1.78	2.72	4.64	7.52	8.1	4.68
TR68252|c1_g1_i3	2.48	0.94	1.85	3.94	5.82	5.52	5.38
TR58948|c0_g1_i1	25.63	27.36	17.38	8.64	6.46	4.56	4.35
TR70096|c4_g1_i6	2.45	2.97	2.62	2.3	1.67	5.82	2.09
Mj_1_GCCAAT_L005_R1_001_(paired)_trimmed_(paired)_contig_13186	2.77	3.33	5.81	6.69	9.91	9.64	6.89
TR56255|c0_g3_i1	0	0	4.32	5.79	15.5	19.91	0.55
Mj_1_GCCAAT_L005_R1_001_(paired)_trimmed_(paired)_contig_68740	0	0	0.23	0.46	0.15	7.48	0
Mj_1_GCCAAT_L005_R1_001_(paired)_trimmed_(paired)_contig_37219	0.14	0	0	0.46	0	5.93	0
TR49188|c0_g1_i2	63.19	86.92	168.71	283.02	386.1	317.15	148.14
TR64252|c0_g2_i1	0.84	0.98	2.21	1.79	3.09	6.27	1.48
TR73084|c1_g6_i1	12.58	9.64	19.81	27.18	33.92	22.91	26.7
TR55202|c1_g1_i1	13.32	30.27	48.24	653.82	885.39	1105.05	83.82
Mj_1_GCCAAT_L005_R1_001_(paired)_trimmed_(paired)_contig_2419	22.88	43.67	88.11	134.54	161.4	118.89	55.71
TR47047|c0_g1_i1	24.59	47.61	95.89	144.5	163.03	122.47	57.88
Mj_1_GCCAAT_L005_R1_001_(paired)_trimmed_(paired)_contig_1239	348.22	280.49	283.05	143.48	107.85	3.9	144.23
TR61683|c1_g1_i2	505.63	402	426.7	197.11	155.33	7.56	202.02
TR65881|c0_g1_i3	0.12	0	2.58	13.54	2.92	12.72	3.72
scaffold14047	40.12	15.9	43.83	44.12	79.04	54.08	33.3
Mj_1_GCCAAT_L005_R1_001_(paired)_trimmed_(paired)_contig_4214	9.2	5.88	8.02	16.76	13.32	13.48	8.47
TR67274|c2_g3_i1	10.14	7.64	8.13	17.13	17.55	16.01	10.02
TR67274|c2_g3_i2	8.64	6.36	8.53	16.43	15.08	14.34	7.6
Mj_1_GCCAAT_L005_R1_001_(paired)_trimmed_(paired)_contig_5692	3.33	3.97	2.12	5.29	3.32	7.55	2.87
TR49782|c0_g1_i1	0.94	0.45	0.18	2.24	1.88	6.8	0.93
TR72922|c0_g1_i2	2.84	4.48	2.94	4.34	4.77	11.45	5.1
TR73288|c4_g1_i1	3.06	4	4.62	6.16	4.42	17.25	4.05
TR71336|c1_g2_i3	27.19	20.16	29.95	10.82	11.15	11.8	2.5
TR72414|c0_g1_i4	12.55	12.97	8.17	3.85	3.45	3.77	7.81
TR57809|c0_g1_i1	34.79	48.44	25.37	55.53	54.94	121.63	18.72
TR50475|c0_g1_i1	3.19	6.42	2.96	35.95	39.37	40.22	7.94
TR31976|c0_g1_i1	3.14	0.79	3.5	13.37	7.9	9.53	14.17
TR26874|c0_g2_i1	0	0.29	2.45	2.34	8.37	4.58	0.88
TR68573|c2_g1_i3	4.93	0.92	2.14	6.14	9	5.72	2.43
Mj_1_GCCAAT_L005_R1_001_(paired)_trimmed_(paired)_contig_63560	0.35	0.99	6.31	26.88	3.62	28.77	1.19
Mj_1_GCCAAT_L005_R1_001_(paired)_trimmed_(paired)_contig_44075	0.28	0.13	0.16	5.72	2.49	5.85	0.68
TR57996|c0_g1_i1	0.43	0.16	0.25	11.59	6.37	10.22	1.01
Mj_1_GCCAAT_L005_R1_001_(paired)_trimmed_(paired)_contig_9495	2.4	2.66	2.23	6.31	5.44	17.21	2.46
TR76992|c2_g1_i10	3.1	3.79	3.52	7.96	6.4	19.99	3.53
TR76992|c2_g1_i7	3.39	4.49	4.33	8.1	8.06	22.57	3.63
TR77085|c0_g1_i4	3.11	3.2	3.14	6.97	7.42	19.12	3.26
Mj_1_GCCAAT_L005_R1_001_(paired)_trimmed_(paired)_contig_43778	0.43	2.43	1.88	8.29	6.38	11.24	9.66
TR78021|c2_g1_i1	0.26	2.08	1.33	5.83	7.2	10.01	11.8
TR78712|c1_g2_i2	7.7	5.92	6.63	4.46	7.28	4.37	5.18
TR56408|c1_g1_i2	3.86	5.99	2.45	0.47	1.76	0.33	4.38
TR58102|c0_g1_i1	14.2	11.13	26.99	27.77	36.58	40.39	17.24
TR71292|c1_g1_i2	10.53	6.93	15.87	44.55	124.07	87.08	19.34
TR74779|c0_g1_i1	25.8	10.67	49.43	59.87	69.66	56.1	30.95
TR32716|c0_g2_i1	0.44	0.21	0	3.12	3.92	5.09	0.86
Mj_1_GCCAAT_L005_R1_001_(paired)_trimmed_(paired)_contig_14460	1.74	1.61	3.38	4.24	3.77	7.2	3.34
TR78375|c0_g2_i1	5.36	5.84	4.48	7.74	9.49	14	7.18
TR78375|c0_g2_i5	5.41	5.98	4.86	8.16	10.42	14.82	7.5
TR75249|c0_g1_i2	161.93	174.5	148.22	45.6	51.69	37.65	118.21
Mj_1_GCCAAT_L005_R1_001_(paired)_trimmed_(paired)_contig_18546	5.58	4.61	9.66	9.87	16.4	22.24	13.08
TR69930|c4_g1_i2	4.47	3.38	7.68	7.91	9.37	12.81	9.32
Mj_1_GCCAAT_L005_R1_001_(paired)_trimmed_(paired)_contig_8056	52.83	46.73	55.64	1.42	0.27	1	55.24
TR69028|c0_g1_i6	13.5	11.98	11.78	0	0.47	0.35	13.62
C970212	9.67	5.85	7.89	8.93	12.96	20.6	4.89
TR49539|c1_g2_i1	9.17	3.69	7.58	7.91	12.99	21.96	4.12
TR49539|c1_g2_i2	6.9	2.75	9.26	4.86	11.45	15.3	2.46
TR52082|c0_g1_i1	5.02	3.67	5.19	6.14	9.84	15.57	3.09
TR53248|c0_g1_i1	5.35	4.36	6.41	5.88	8.46	15.92	2.31
Mj_1_GCCAAT_L005_R1_001_(paired)_trimmed_(paired)_contig_24670	0	0.56	3.06	19.61	2.14	45.85	0.28
Mj_1_GCCAAT_L005_R1_001_(paired)_trimmed_(paired)_contig_24671	0.7	1.17	10.63	18.56	7.63	50.89	1.3
TR59180|c0_g2_i1	0.52	2.74	11.17	26.88	8.23	79.82	2.15
TR78885|c1_g1_i5	0	0.24	0.75	2.03	0.96	5.89	0.75
TR78885|c1_g3_i2	0	0.12	0.15	0.2	0	7.31	0
TR76839|c0_g1_i1	1.91	1.72	2.11	3.69	4.58	7.32	2.51
TR76839|c0_g1_i5	1.94	1.6	2.4	5.6	7.88	8.92	2.87
TR76839|c0_g1_i7	2.19	1.76	3.74	7.36	7.72	9.27	3.76
TR76933|c1_g1_i7	2.07	1.8	2.13	5.21	5.71	8.36	2.53
TR76933|c1_g1_i9	1.5	1.52	2.05	4.02	5.56	7.17	3.01
TR70684|c1_g1_i1	5.21	5	4.97	0.79	2.95	1.37	2.44
Mj_1_GCCAAT_L005_R1_001_(paired)_trimmed_(paired)_contig_3828	51.66	60.09	67.6	28.62	39.79	23.57	53.61
TR71292|c0_g1_i1	65.68	81.83	86.79	40.12	58.17	30.81	70.12
TR74649|c0_g1_i1	4.09	3.79	1.28	5.16	5.77	8.43	2.14
TR74649|c0_g1_i5	4.43	2.31	1.74	7.54	11.85	9.15	2.81
TR76371|c1_g1_i4	6.05	3.76	2.01	8.29	8.23	9.97	3.91
TR66999|c0_g1_i1	4.88	2.49	2.35	16.65	14.67	24.23	16.17
TR66999|c0_g1_i2	3.95	2.5	2.64	13.91	13.71	24.17	15.52
TR72056|c1_g1_i1	1.05	0.59	1.29	14.87	6.11	29.8	6.1
TR56402|c0_g1_i1	1.56	0.74	0.73	10.38	12.8	13.48	18.12
Mj_1_GCCAAT_L005_R1_001_(paired)_trimmed_(paired)_contig_5561	7.01	8.6	7.51	11.22	9.58	26.99	9.27
TR75568|c0_g1_i2	8.91	8.57	9.39	13.55	9.8	30.14	11
TR63589|c1_g1_i1	2.92	2.11	4.15	6.74	6.75	8.27	5.17
TR68894|c3_g1_i10	2.97	2.86	5.45	6.29	7.29	7.81	5.61
TR68894|c3_g1_i11	5.67	4.42	6.98	8.44	8.35	8.56	5.04
TR68894|c3_g1_i5	4.44	4.81	8.24	10	8.33	10.16	6.53
scaffold11566	3.56	3.38	6.87	8.89	6.86	7.35	4.51
scaffold11567	2.28	2.56	4.39	6.06	6.13	7.76	3.49
TR49503|c0_g1_i1	4.27	4.62	9.06	11.76	9.16	19.15	8.85
TR50438|c0_g2_i2	1.88	2.3	3.47	4.69	3.61	8.35	2.78
TR59390|c0_g1_i1	14.49	13.2	22.47	34.83	18.68	28.13	20.27
TR60600|c0_g1_i2	15.25	17.45	23	36.35	22.17	36.13	25.55
Mj_1_GCCAAT_L005_R1_001_(paired)_trimmed_(paired)_contig_6274	10	7.23	15.56	32.54	30.28	33.82	15.26
TR47234|c0_g1_i3	6.38	7.02	6.6	4.2	6.1	5.38	5.75
Mj_1_GCCAAT_L005_R1_001_(paired)_trimmed_(paired)_contig_10489	9.4	7	5.44	14.85	11.95	25.1	7.79
TR79110|c0_g1_i11	11.64	12.39	9.89	19.01	19.68	41.25	11.98
TR73553|c1_g2_i8	7.99	6.12	7.22	7.46	8.49	9.31	8.81
TR70045|c0_g1_i2	0.31	0.95	1.63	4.52	5.07	3.42	1.82
TR79269|c2_g2_i5	6.09	7.26	8.77	3.48	2.31	4.01	7.82
TR79506|c6_g1_i1	6.32	7.06	7.89	2.86	1.95	3.57	7.06
TR79506|c6_g1_i3	4.72	4.85	6.11	2.73	1.9	3.5	4.72
TR49919|c0_g1_i1	491.16	469.23	474.04	390.07	412.66	197.61	383.22
TR48688|c0_g2_i1	25.61	20.9	96.47	219.01	175.27	336.78	26.11
Mj_1_GCCAAT_L005_R1_001_(paired)_trimmed_(paired)_contig_15933	0.95	1.41	2.55	3.79	6.99	6.84	3.71
TR68111|c0_g4_i2	1.59	1.61	5.27	12.07	10.72	11.07	6.85
TR68111|c0_g4_i4	1.45	1.54	4.42	9.3	8.17	10.74	7.09
TR68433|c2_g1_i3	1.34	1.25	4.06	10.9	9.78	9.31	5.31
TR68433|c2_g1_i6	0.98	1.41	3.73	8.29	7.82	9.98	5.3
TR68433|c2_g1_i8	1.01	1.13	3.53	9.19	8.31	10.65	5.49
TR71409|c0_g1_i3	4.74	5.15	3.19	0.29	1.02	0.05	1.43
TR71043|c0_g2_i1	17.49	9.58	13.99	23.98	18.98	25.65	11.29
TR71734|c1_g2_i2	1.97	2.49	2	4.73	3.94	6.55	3.78
TR71734|c2_g2_i1	2.17	1.99	2.65	4.44	4.19	5.46	3.09
TR74202|c0_g1_i2	3.37	5.25	2.59	7.92	12.66	11.57	3.93
TR79241|c0_g1_i1	2.94	5.64	3.74	8.53	11.09	12.7	3.86
Mj_1_GCCAAT_L005_R1_001_(paired)_trimmed_(paired)_contig_30922	0	0.44	4.31	17.39	13.64	34.16	5.41
Mj_1_GCCAAT_L005_R1_001_(paired)_trimmed_(paired)_contig_38643	0.46	0.44	0.72	4.13	5.03	15.29	3.32
TR54634|c0_g2_i1	0	0.41	1.26	17.22	15.26	36.11	4.62
TR77517|c3_g1_i1	0.4	0.27	1.67	11.95	11.1	24.42	5.62
TR77517|c3_g1_i2	0.51	0.69	2.51	16.19	11.9	27.5	6.1
Mj_1_GCCAAT_L005_R1_001_(paired)_trimmed_(paired)_contig_22791	6.86	4.61	9.97	17.45	18.28	26.89	13.45
TR72366|c3_g1_i1	6.85	4.81	9.79	15.68	17.49	24.09	12.47
TR68011|c0_g1_i1	1.3	1.69	2.36	54.64	30.26	88.56	16.44
TR68196|c0_g1_i1	3.48	1.61	2.52	3.97	6.15	5.96	3.17
TR62534|c1_g2_i1	6.47	5.72	5.94	1.75	1.94	0.87	4.86
TR75446|c0_g1_i4	2.37	1.64	4.05	2.74	3.87	5.15	4.25
Mj_1_GCCAAT_L005_R1_001_(paired)_trimmed_(paired)_contig_20287	9.29	13.85	4.75	3.88	1.69	2.51	11.3
TR70854|c0_g1_i1	23.78	27.5	15.52	6.43	6.44	6.9	26.08
TR49993|c0_g1_i1	3.84	5.53	1.29	0	0	0	5.93
TR57202|c0_g1_i3	4.87	5.06	2.99	0.35	1.49	0.25	1.75
TR73162|c0_g1_i1	8.96	10.53	8.56	14.36	9.16	14.59	15.13
TR63012|c0_g1_i1	1.41	2.15	1.82	2.91	5.9	14.7	0.14
Mj_1_GCCAAT_L005_R1_001_(paired)_trimmed_(paired)_contig_1025	11.13	10.69	7.11	0.5	0.79	0.56	3.87
TR62025|c0_g2_i6	9.58	6.9	7.6	4.43	10.18	6.32	4.29
Mj_1_GCCAAT_L005_R1_001_(paired)_trimmed_(paired)_contig_4420	4.29	5.28	4.41	0	0	0.07	2.33
TR64012|c2_g1_i1	6.56	9.57	6.79	0	0	0.07	3.39
TR57500|c0_g1_i2	4.36	2.5	4.74	6.32	7.56	5.86	4.03
TR57500|c0_g1_i3	2.44	0.54	2.21	4.17	3.65	6.88	1.67
TR59149|c0_g2_i1	4.95	2.9	6.64	8.28	8.86	8.49	4.83
TR59149|c0_g2_i2	4.75	3.92	5.96	7.18	7.96	7.76	5.71
TR59149|c0_g2_i3	3.45	3	4.84	7.48	7.05	6.79	4.21
Mj_1_GCCAAT_L005_R1_001_(paired)_trimmed_(paired)_contig_7634	8.58	11.84	12.32	12.29	16.34	13.9	12.13
TR50491|c0_g1_i1	10.82	8.61	16.06	16.58	14.06	19.17	11.8
TR67787|c0_g1_i1	0.64	2.06	4.27	3.85	4.21	9.51	3.08
TR60104|c0_g1_i1	2.27	1.79	3.22	6.35	5.63	3.92	4.56
C916143	4.22	5.71	4.68	4.71	11.45	9.87	6.1
TR76061|c0_g2_i1	13.06	14.7	8.05	12.34	19.99	22.26	17.02
TR76061|c0_g3_i2	5.94	5.69	3.11	4.53	10.82	9.25	6.72
TR76061|c0_g3_i4	4.55	2.67	2.68	3.6	6.39	5.02	2.24
TR70462|c0_g3_i7	5.93	4.64	6.39	5.29	4.99	7.91	6.31
Mj_1_GCCAAT_L005_R1_001_(paired)_trimmed_(paired)_contig_69011	0.09	1.08	0.72	2.49	2.74	5.63	1.46
C975202	7.51	7.81	4.63	0.84	0.65	0.84	3.87
TR76646|c0_g1_i3	10.74	15.93	10.89	16.06	17.53	28.14	19.59
Mj_1_GCCAAT_L005_R1_001_(paired)_trimmed_(paired)_contig_2340	9.83	15.86	25.89	50.88	74.2	52.45	27.08
TR64105|c0_g1_i2	8.83	14.72	25.46	46.82	68.82	52.53	25.84
TR65798|c2_g1_i1	9.13	14.62	24.32	38.14	66.04	49.65	24.2
scaffold10559	7.38	11.62	16.73	34.96	51.06	42.67	18.68
scaffold10560	9.7	12.15	23	45.6	59.13	47.14	22.83
TR79127|c0_g1_i3	20.8	17.55	25.46	16.98	10.86	5.94	14.9
C969878	5.85	8.77	9.26	20.96	13.94	17.25	22.28
TR67405|c2_g1_i1	4.4	7.77	9.41	17.75	10.99	15.49	19.31
TR70350|c1_g1_i3	6.72	5.5	10.45	14.31	13.92	20.52	9.39
Mj_1_GCCAAT_L005_R1_001_(paired)_trimmed_(paired)_contig_8593	4.51	3.85	3.95	7.23	5.91	9.66	6.5
TR77622|c0_g1_i1	4.39	4.22	3.67	7.75	5.73	10.07	6.56
TR77622|c0_g1_i3	3.25	3.1	4.78	6.3	6.55	9.95	6.02
TR77622|c0_g1_i4	4.12	4.39	4.39	7.76	7.08	10.37	6.98
scaffold13854	10.79	8.1	5.18	4.21	2.83	4.63	8.44
Mj_1_GCCAAT_L005_R1_001_(paired)_trimmed_(paired)_contig_2730	33.29	22.14	12.52	32.88	26.13	73	18.74
TR59342|c0_g2_i1	37.15	23.18	14.87	36.26	25	71.21	19.59
TR70784|c0_g4_i10	0.7	2	0.55	5.5	10	9.47	9.35
TR70784|c0_g4_i2	6.29	6.88	9.32	22.03	42.39	35.36	28.84
TR70784|c0_g4_i9	2.02	3.28	5.23	5.75	9.03	14.74	12.32
TR45778|c0_g1_i1	1.19	1.71	3.37	3.99	1.79	6.91	0.35
TR66116|c1_g1_i1	10.63	9.52	14.16	6.97	5.63	2.09	10.96
TR63619|c0_g1_i1	71.9	83.49	110.22	287.55	339.18	478.93	100.39
scaffold11167	62.48	66.53	86.27	236.51	277.28	396.93	81.06
TR75477|c2_g2_i7	5.51	6.44	6.06	0.92	1.34	1.88	6.07
Mj_1_GCCAAT_L005_R1_001_(paired)_trimmed_(paired)_contig_22544	4.3	5.15	5.07	2.62	2.62	1.94	3.44
TR71072|c0_g1_i8	2.29	1.73	3.24	3.91	5.18	3.96	2.42
TR73242|c2_g2_i2	2.66	2.88	2.26	3.91	6.15	4.71	3.24
Mj_1_GCCAAT_L005_R1_001_(paired)_trimmed_(paired)_contig_2321	3.45	2.63	2.97	4.36	4.73	5.23	3.99
TR78090|c0_g1_i2	2.47	2.42	2.55	3.63	3.43	5.17	2.97
TR78090|c0_g1_i4	2.12	2.95	4.31	4.58	7.18	6.4	4.17
TR78525|c0_g2_i3	4.13	3.4	4.44	5.15	5.29	6.08	4.37
TR39558|c0_g1_i1	1.37	0.56	1.61	12.99	4.08	6.7	7.5
TR65915|c0_g1_i1	6.76	5.88	11.89	16.09	12.66	14.93	11.7
TR65054|c1_g1_i2	8.21	8.48	16.7	49.65	43.67	44.39	14.03
TR73205|c0_g1_i1	17.26	17.31	30.17	29.57	32.1	36.73	21.18
TR74039|c0_g1_i2	8.96	7.45	14.65	13.94	23.29	20.79	10.3
TR74039|c0_g1_i5	8.72	6.21	14.56	16.85	16.59	17.94	9.69
TR74039|c0_g1_i6	4.86	3.33	7.15	8.43	13.39	10.11	6.74
scaffold13620	11.07	10.4	18.39	18.07	20.8	25.66	13.68
TR54478|c1_g1_i1	5.09	4.53	5.43	10.91	10.72	13.25	10.77
TR54478|c1_g1_i3	4.47	3.49	4.29	8.62	9.47	12.63	8.85
TR54478|c1_g1_i7	8.86	5.84	5.82	13.02	16.5	20.03	15.99
TR54478|c1_g1_i8	4.24	4.15	4.3	7.67	12.17	14.53	9.76
TR58861|c0_g1_i5	1.39	3.09	4.76	11.21	7.27	10.16	5.59
scaffold12910	7.74	3.57	11.63	40.4	2.5	45.36	11.06
TR59601|c0_g1_i5	2.68	3.73	11.02	12.39	9.53	15.15	3.88
TR73661|c0_g1_i1	9.22	7.24	15.3	23.96	22.46	31.1	13.15
TR77757|c0_g1_i3	3.1	2.42	2.16	2.92	4.13	6.53	2.16
TR77910|c2_g1_i10	9.05	8.67	9.18	8.04	10.84	12.16	11.49
Mj_1_GCCAAT_L005_R1_001_(paired)_trimmed_(paired)_contig_12752	13.58	11.74	12.49	14.82	13.29	17.45	12.48
TR75620|c0_g2_i1	3.25	3.37	3.82	3.84	2.81	5.67	1.6
TR62285|c0_g1_i2	6.15	6.36	5.74	7.59	7.31	7.9	7.95
TR52118|c0_g1_i1	4.34	5.6	10.76	18.03	25.07	21.87	23.04
TR52118|c0_g1_i2	6.76	6.82	12.07	20.68	24.76	20.7	25.01
TR52118|c0_g1_i3	5.07	6.22	10.35	18.23	21.09	21.64	18.72
TR52118|c0_g1_i4	7.75	6.63	11.11	24.9	28.09	22.47	27.09
TR49949|c0_g1_i1	17.58	22.94	11.94	55.5	52.27	84.55	27.32
TR70423|c6_g1_i2	4.52	5.08	2.74	10.68	12.34	17.24	5.57
TR70423|c6_g1_i3	7.45	7.99	3.03	16.65	14.52	23.67	9.13
TR72980|c0_g1_i2	9.85	8.57	8.2	13.77	14.65	15.55	7.2
Mj_1_GCCAAT_L005_R1_001_(paired)_trimmed_(paired)_contig_12689	9.64	8.54	9.74	13.42	12.25	20.55	13.02
Mj_1_GCCAAT_L005_R1_001_(paired)_trimmed_(paired)_contig_2969	8.58	5.61	4.39	11.45	7.2	14.05	9.91
TR48874|c0_g1_i1	5.41	3.49	3.18	7.57	5.47	9	5.8
TR74713|c0_g1_i1	11.14	8.09	8.9	14.46	13.45	22.44	13.34
TR58327|c0_g1_i2	0.43	0.07	0.17	14.62	2.37	24.95	0.14
TR60577|c0_g1_i1	0.69	0.26	0.65	19.52	4.99	31.9	0.27
TR60577|c0_g1_i2	0.17	0.06	0.21	11.61	3.41	23.02	0.23
Mj_1_GCCAAT_L005_R1_001_(paired)_trimmed_(paired)_contig_15169	4.81	3.84	12.04	11.12	14.05	21.09	5.33
TR62646|c0_g1_i2	6.61	6.85	16.06	21.45	18.98	37.96	11.19
C952240	1.43	1.59	4.91	16.48	3.21	9.81	9.64
TR66512|c0_g1_i1	2.69	2.13	4.48	7.92	5.92	7.65	1.5
TR73029|c1_g1_i2	0.24	0.31	11.77	24.51	35.45	35.04	5.57
TR66303|c0_g1_i1	9.04	5.67	9.95	11.88	9.55	14.96	10.47
TR70044|c1_g1_i2	4.63	5.25	3.91	2.75	2.81	1.28	3.85
TR50713|c0_g1_i1	5.87	3.21	10.12	15.27	13.12	18.33	8.26
Mj_1_GCCAAT_L005_R1_001_(paired)_trimmed_(paired)_contig_10650	7.04	7.26	7.87	24.02	15.2	55.81	12.07
Mj_1_GCCAAT_L005_R1_001_(paired)_trimmed_(paired)_contig_6854	8.17	8.35	5.83	22.61	14.18	53.85	11.32
TR77598|c0_g1_i1	7.48	6.37	7.36	21.01	13.68	51.52	10.52
Mj_1_GCCAAT_L005_R1_001_(paired)_trimmed_(paired)_contig_17288	1.18	1.55	2.44	19.81	13.48	23.93	8.86
TR74516|c0_g1_i1	1.38	1.49	2.91	17.95	11.93	22.27	7.79
TR77188|c1_g1_i1	4.27	4.58	3.07	16.93	15.51	20.23	4.39
TR76212|c0_g1_i2	3.38	3.31	5.3	4.33	5.91	8.68	4.08
Mj_1_GCCAAT_L005_R1_001_(paired)_trimmed_(paired)_contig_7276	7.42	5.94	7.86	10.71	7.22	13.14	7.34
TR75923|c0_g1_i4	9.93	8.55	10.56	14.35	11.53	18.71	9.88
Mj_1_GCCAAT_L005_R1_001_(paired)_trimmed_(paired)_contig_123	11.13	5.92	16.44	20.79	38.9	37.07	19.63
Mj_1_GCCAAT_L005_R1_001_(paired)_trimmed_(paired)_contig_737	17.36	23.28	17.2	2.41	3.3	1.99	24.47
TR69057|c0_g1_i4	7.57	11.83	12.42	3.17	3.84	1.9	11.98
TR56958|c1_g1_i2	2.16	1.74	15.94	30.29	58.86	61.95	3.04
Mj_1_GCCAAT_L005_R1_001_(paired)_trimmed_(paired)_contig_21845	2.67	3.81	4.6	5.38	5.2	9.11	7.02
TR74403|c0_g2_i2	6.43	6.44	8.59	14.4	12.27	18.75	13.57
TR74965|c0_g1_i2	8.98	9.3	12.78	16.11	13.5	20.47	16.87
TR74965|c0_g1_i3	7.21	6.01	8.02	12.12	13.51	15.49	11.42
TR73001|c1_g2_i1	8.03	6.35	8.49	9.81	9.3	12.23	10.89
TR73001|c1_g2_i2	7.55	5.85	7.55	10.53	9.32	12.96	10.53
TR73001|c1_g2_i9	6.66	4.76	6.87	9.1	7.74	11.2	8.28
TR64216|c0_g1_i3	3.17	2.92	5.2	5.55	7.43	7.37	6.22
TR64216|c0_g1_i4	3.52	2.82	4.7	6.44	9.11	8.16	6.63
TR66216|c1_g1_i2	23.09	27.3	19.05	11.52	11.53	11.84	21.11
TR72123|c0_g1_i2	14.43	16.09	7.83	4.72	9.82	9.11	14.44
Mj_1_GCCAAT_L005_R1_001_(paired)_trimmed_(paired)_contig_8473	1.08	0.72	2.68	6.04	5.04	9.3	1.29
TR76153|c0_g1_i1	1.14	0.67	1.75	4.31	4.72	7.3	1.04
TR76785|c2_g1_i6	6.01	5.76	3.19	2.07	4.35	3.32	5.88
TR69407|c0_g2_i2	2.13	4.17	6.45	11.49	6.68	7.62	5.16
Mj_1_GCCAAT_L005_R1_001_(paired)_trimmed_(paired)_contig_72588	0.33	0.16	0.97	6.52	7.13	12.04	0.65
TR70340|c0_g1_i2	4.09	4.5	6.38	6.41	8.86	7.26	2.8
TR70340|c1_g4_i1	2.91	4.92	8.62	8.36	11.41	8.47	2.78
Mj_1_GCCAAT_L005_R1_001_(paired)_trimmed_(paired)_contig_15298	11.69	11.88	9.73	17.92	12.7	25.66	11.06
TR70507|c0_g1_i1	13.15	12.87	13.77	21.04	14.92	28.97	13.38
TR69249|c5_g9_i2	4.38	3.2	5.5	9.03	9.38	10.04	4.17
TR76999|c0_g3_i1	6.67	6.36	8.02	10.82	9.08	14.64	10.81
TR76999|c0_g3_i9	11.84	6.48	10.2	14.21	22.46	17.8	12.53
TR76415|c0_g1_i1	10.5	19.31	19.8	8.18	8.25	8.76	19.19
TR52683|c0_g3_i3	4.27	4.64	5.31	2.08	2.67	2.51	3.63
Mj_1_GCCAAT_L005_R1_001_(paired)_trimmed_(paired)_contig_13482	3.34	6.24	4.91	6.3	5.37	10.39	2.89
TR69486|c0_g1_i5	5.85	12.44	9.4	16.32	11.28	21.61	4.77
TR69486|c0_g1_i6	0.93	7.16	3.3	8.12	4.17	10.83	1.38
scaffold11893	1.47	4.46	3.24	4.99	4.07	7.68	1.17
scaffold11894	2.09	5.85	3.76	9.11	6.37	12.35	2.73
TR57163|c0_g1_i1	9.83	22.55	14.48	5.52	8.39	1.89	20.2
TR55446|c0_g1_i1	0	0	0	3.57	0.11	9.29	0.29
TR68040|c0_g2_i1	6.67	6.62	8.01	9.51	11.61	18.59	5.77
Mj_1_GCCAAT_L005_R1_001_(paired)_trimmed_(paired)_contig_14879	8.76	7.31	12.65	14.37	16.66	20.02	8.65
TR67259|c0_g1_i2	14.86	13.31	17.24	24.94	25.71	33.14	12.38
TR68068|c1_g3_i2	4.55	3.23	2.77	4.2	6.55	6.11	3.44
Mj_1_GCCAAT_L005_R1_001_(paired)_trimmed_(paired)_contig_14676	0.2	0.13	0.39	3.84	2.32	7.78	1.52
TR73258|c0_g2_i11	0.42	0.44	0.5	2.09	1.33	5.73	1.37
TR73258|c0_g2_i13	0.66	0.46	0.37	1.84	1.68	5.38	1.24
Mj_1_GCCAAT_L005_R1_001_(paired)_trimmed_(paired)_contig_34681	2.26	1.85	7.79	53.53	55.73	45.86	13.21
TR71318|c1_g1_i1	2.77	1.44	7.42	48.69	54.23	48.41	10.79
TR71318|c1_g1_i3	1.08	1.09	5.62	38.41	45.21	38.89	7.61
TR77699|c2_g1_i1	50.2	35.32	40.14	22.91	13.46	13.36	29.64
Mj_1_GCCAAT_L005_R1_001_(paired)_trimmed_(paired)_contig_384	8.15	6.68	9.39	13.04	9.34	13.2	9.49
TR77831|c0_g1_i2	8.76	8.06	11.3	15.72	13.41	19.99	11.45
TR37962|c0_g2_i1	6.61	4.2	4.92	1.93	4.62	2.57	5
TR75256|c1_g1_i1	33.47	32.94	59.15	56.83	74.89	60.01	56.69
TR78539|c0_g2_i13	5.12	3.81	3.79	1.5	4.24	2.52	5.04
TR58921|c0_g1_i1	2.37	2	2.46	2.88	2.5	5.42	3.71
TR60308|c0_g1_i1	4.96	5.76	6.79	6.18	11.85	8.95	8.74
TR76020|c2_g1_i2	5.8	6.73	6.08	0.71	0.77	0.21	3.53
TR77293|c0_g1_i7	0.75	1.23	0.89	2.4	8.55	6.23	2.87
Mj_1_GCCAAT_L005_R1_001_(paired)_trimmed_(paired)_contig_16731	6.19	4.05	5.39	4.83	4.26	1.94	6.76
TR71972|c0_g1_i2	13.23	11.76	4.91	3.98	4.64	2.79	9.34
TR68231|c0_g1_i4	9.77	5.12	5.8	6.99	8.64	15.35	8.14
TR78426|c0_g1_i3	17.24	11.61	6.82	6.7	6.86	13.64	14.45
TR72576|c0_g1_i9	2.82	1.62	1.76	3.67	4.46	5.69	3.48
TR74140|c0_g1_i6	3.35	1.87	1.65	4.66	5.23	4.5	2.34
TR59147|c0_g1_i2	5.32	5.63	6.12	8.64	10.8	9.46	8.39
TR67693|c0_g1_i8	0.88	0.33	2.88	21.01	22.47	28.33	3.92
TR68469|c0_g1_i1	1.1	1.3	4.36	31.06	34.27	43.71	5.84
TR67607|c0_g2_i1	8.35	11.39	14.06	18.59	16.72	33.59	9.73
TR68366|c0_g1_i2	3.42	8.65	15.68	28.99	19.87	44.97	17.19
Mj_1_GCCAAT_L005_R1_001_(paired)_trimmed_(paired)_contig_10354	3.16	2.06	3.91	22.67	29.04	18.98	9.01
TR45436|c0_g1_i1	8.1	7.38	7.37	0.2	1.65	0.14	1.33
TR77346|c0_g1_i1	1.48	2.13	3.31	6.76	4.3	6.17	4.19
TR77617|c0_g1_i2	1.3	2.88	4.9	8.79	6.51	8.64	6.42
TR78013|c0_g1_i1	2.4	3.37	2.57	3.04	2.87	10.77	3.45
TR78890|c0_g1_i2	7.27	6.72	8.26	8.02	7.81	26.12	6.82
TR63106|c1_g1_i1	5.33	2.76	3.62	49.4	32.13	36.06	42.55
TR63779|c0_g1_i2	3.68	2.34	3.02	34.6	29.6	23.84	26.55
TR78993|c7_g1_i2	4.64	3.65	3.06	7.59	7.44	9.18	3.12
TR78993|c7_g1_i4	2.16	2.78	3.43	3.59	5.08	5.55	3.07
Mj_1_GCCAAT_L005_R1_001_(paired)_trimmed_(paired)_contig_11694	2.68	2.71	6.7	12.25	12.31	16.97	6.94
TR62591|c0_g1_i2	4.82	3.34	6.78	14.47	13.74	15.23	6.07
TR63652|c0_g1_i2	4.33	3.93	7.89	14.59	12.36	16.98	7.53
TR63652|c0_g1_i3	2.69	2.2	5.25	11.76	7.86	10.72	5.32
TR70096|c5_g1_i1	3.82	3.11	4.4	9.89	8.25	20.85	2.99
TR76708|c0_g2_i5	5.82	13.57	6.93	2.26	5.33	1.27	6.24
TR65722|c1_g1_i1	1.26	0.8	3.72	17.78	1.79	18.24	4.86
Mj_1_GCCAAT_L005_R1_001_(paired)_trimmed_(paired)_contig_3359	4.25	4.36	7.57	12.15	12.91	16.57	6.07
Mj_1_GCCAAT_L005_R1_001_(paired)_trimmed_(paired)_contig_5651	46.78	51.19	89.57	497.28	343.25	456.02	171.03
TR62909|c0_g1_i3	1.95	2.44	4.9	5.98	8.11	6.42	4.22
TR41836|c0_g1_i1	1.44	1.38	3.4	20.59	1.62	16.39	1.95
TR41836|c0_g1_i3	2.23	2.25	3.71	26.07	1.77	34.14	2.2
TR77086|c0_g1_i1	3.03	1.76	3.06	4.45	4.6	5.54	2.07
TR77086|c0_g1_i3	6.3	3.35	3.85	5.54	5.21	10.57	5.74
TR77255|c0_g1_i7	3.58	2	3.06	5.59	5.27	5.79	2.36
Mj_1_GCCAAT_L005_R1_001_(paired)_trimmed_(paired)_contig_3662	15.08	11.93	16.8	30.04	23.15	36.84	14.39
TR54828|c0_g1_i2	5.01	3.55	3.48	3.27	1.54	1.86	4.56
Mj_1_GCCAAT_L005_R1_001_(paired)_trimmed_(paired)_contig_12405	3.64	1.54	5.15	4.69	3.48	7.93	2.98
TR77619|c1_g1_i2	14.84	18.23	14.88	22.81	25.4	49.44	25.34
TR79383|c1_g1_i13	3.49	2.5	4.72	4.11	4.6	7.36	5.53
TR79505|c1_g1_i2	3.31	2.71	4.3	3.79	4.17	6.17	4.3
TR66599|c0_g1_i1	7.81	5.78	10.92	16.37	15.74	15.03	9.43
TR66599|c0_g1_i2	17.82	12.4	24.5	35.65	34.51	31.55	23.45
TR66599|c0_g1_i6	7.81	5.57	10.34	17.83	14.47	13.43	10.87
Mj_1_GCCAAT_L005_R1_001_(paired)_trimmed_(paired)_contig_37682	1.62	1.87	2.73	15.11	14.03	9.79	4.51
TR66986|c0_g1_i1	130.59	197.17	161.98	74.16	80.06	25.52	72.46
TR65795|c0_g1_i1	24.13	30.18	42.1	206.86	189.72	418.08	56.11
scaffold14450	17.74	22.38	34.02	169.79	160.21	325.58	46.06
Mj_1_GCCAAT_L005_R1_001_(paired)_trimmed_(paired)_contig_542	100.92	103.35	83.43	23.42	7.99	23.08	55.38
Mj_1_GCCAAT_L005_R1_001_(paired)_trimmed_(paired)_contig_13567	5.98	3.43	6.27	11.36	8.65	11.41	5.55
TR62731|c0_g2_i5	6.53	6.92	7.06	11.47	5.8	12.71	6.08
TR71290|c0_g1_i1	3.66	3.82	3.21	3.74	5.16	8.03	3.17
TR38821|c0_g2_i1	16.91	14.16	14.03	5.79	3.44	1.92	13.06
TR50706|c0_g1_i1	12.06	11.87	11.48	1.88	2.49	2.44	7.83
TR50706|c0_g1_i4	9.22	9.48	5.43	1.03	2.35	1.03	6.55
scaffold10193	9.1	10.61	7.78	2.06	1.8	2.14	6.34
scaffold10194	9.78	11.2	7.48	1.69	1.5	2.36	7.69
TR54778|c0_g1_i1	5.39	3.42	4.67	7.67	5.67	10.63	8.68
TR54778|c0_g1_i2	3.56	4.29	6.16	5.99	9.25	10.01	9.5
TR79649|c0_g1_i2	9.37	8.01	7.97	14.17	12.46	18.81	10.46
TR79649|c0_g1_i5	6.71	4.59	4.82	7.57	6.43	10.48	6.72
scaffold11573	4.95	3.47	3.87	6.6	9.01	7.69	5.52
TR57225|c0_g1_i1	3.71	4.69	5.25	2.28	3.91	1.3	2.2
TR57225|c1_g3_i2	10.9	12.97	15.39	5.2	12.4	3.03	4.75
Mj_1_GCCAAT_L005_R1_001_(paired)_trimmed_(paired)_contig_10134	28.9	30.64	19.37	0	0.2	0	13.86
TR75517|c1_g2_i6	2.31	3.31	3.8	2.55	4.46	5.35	2.72
TR76773|c0_g1_i1	26.18	25.25	28.8	30.07	19.29	38.87	27.96
TR67413|c0_g1_i1	4.47	4.76	6.47	6.49	7.9	10.25	7.91
Mj_1_GCCAAT_L005_R1_001_(paired)_trimmed_(paired)_contig_75958	0	0.07	0.98	4.96	0	17.3	0
TR72457|c3_g1_i2	22.05	17.48	57.12	107.05	83.88	147.7	79.51
TR75364|c0_g1_i2	7.72	9.31	7.44	1.25	2.31	2.43	6.25
Mj_1_GCCAAT_L005_R1_001_(paired)_trimmed_(paired)_contig_7790	6.21	5.23	5.55	8.57	8.33	10.69	8.6
TR75413|c0_g1_i1	6.14	4.05	5.64	8.28	8.19	9	9.35
TR75413|c0_g1_i2	7.11	4.48	5.18	7.74	8.4	9.41	7.96
TR77260|c0_g3_i2	4.79	3.29	4.47	6.21	6.92	7.45	6.02
scaffold10627	2.87	2.11	3.47	5.74	6.27	5.21	4.05
TR60626|c0_g1_i1	3.84	3.66	3.36	6.29	6.09	5.5	4.12
TR60626|c0_g1_i5	4	2.46	4.1	4.1	6.37	5.88	4.58
TR62479|c0_g1_i3	2.41	1.7	3.05	4.41	5.89	6.66	3.97
TR62479|c0_g1_i7	5.23	3.45	5.45	9.76	9.35	8.96	6.46
Mj_1_GCCAAT_L005_R1_001_(paired)_trimmed_(paired)_contig_3938	5.85	5.12	5.66	8.82	7.08	11.61	9.97
TR77495|c0_g1_i1	8.34	6.88	8.5	12.37	12.72	18.92	13.28
Mj_1_GCCAAT_L005_R1_001_(paired)_trimmed_(paired)_contig_1590	3.51	3.9	2.44	6.91	9.81	9.26	9.28
TR69547|c1_g1_i1	2.77	2.58	2.32	6.25	8.01	8.09	6.34
TR72079|c0_g1_i3	4.11	3.83	2.9	8.25	11.57	10.55	10.8
TR79346|c1_g5_i2	4.95	3.4	5.06	12.53	18.03	16.46	15.15
TR74670|c0_g2_i1	3.43	2.57	5.85	13.54	3.79	25.4	5.22
Mj_1_GCCAAT_L005_R1_001_(paired)_trimmed_(paired)_contig_7950	6.97	5.59	6.49	10.47	15.06	18.34	16.11
TR75000|c0_g2_i2	4.39	4.06	4.25	6.76	11.2	12.47	10.95
TR75000|c0_g2_i3	5.19	4.08	4.89	8.22	12.44	14.39	13.38
TR71905|c1_g4_i1	6.14	5.89	8.21	9.69	12.01	8.92	8.23
Mj_1_GCCAAT_L005_R1_001_(paired)_trimmed_(paired)_contig_15382	3.07	2.53	4.24	5.9	3.34	12.86	4.19
TR76732|c1_g1_i1	1.63	1.98	4.02	3.53	3.33	9.55	3.22
TR78657|c0_g1_i1	3.27	3.81	4.79	4.78	4.59	14.43	4.65
Mj_1_GCCAAT_L005_R1_001_(paired)_trimmed_(paired)_contig_52387	0.81	0.93	26.08	48.23	85.79	79.12	20.72
Mj_1_GCCAAT_L005_R1_001_(paired)_trimmed_(paired)_contig_294	7.19	6.88	8.22	3.68	5.67	2.57	5.41
Mj_1_GCCAAT_L005_R1_001_(paired)_trimmed_(paired)_contig_7873	4.5	3.03	4.92	8.75	8.82	8.15	11.35
TR66436|c0_g1_i1	3.93	3.5	5	8.9	10.2	9.27	9.72
TR66436|c0_g1_i3	1.21	1.48	2.24	2.57	5.37	6.11	4.1
TR66436|c1_g1_i3	1.89	1.4	3.96	5.95	7.14	7	5.93
C944008	46	74.7	121.53	307.79	343.26	231.21	102.82
TR49526|c0_g1_i1	17.55	30.38	56.23	134.1	140.72	88.3	43.88
TR70384|c1_g4_i1	2.76	1.75	1.55	3.96	5.11	3.94	2.46
TR68081|c2_g1_i5	3.05	2.56	3.13	3.16	6.34	4.67	4.7
TR68053|c0_g1_i2	9.86	10.22	9.94	13.99	13.2	28	16.58
Mj_1_GCCAAT_L005_R1_001_(paired)_trimmed_(paired)_contig_4928	2.7	3	3.2	2.93	4.19	5.14	3.36
TR61739|c0_g1_i3	2.63	2.81	3.65	5.66	5.33	4.82	3.21
scaffold11730	3.53	2.49	3.85	6.14	6.97	5.1	4.33
TR73923|c0_g1_i1	5.8	4.79	5.08	6.12	5.36	7.03	6.65
TR73923|c0_g1_i2	4.92	4.73	4.77	5.5	5.16	6.89	6.29
TR73923|c0_g1_i4	5.32	4.24	4.54	5.59	5.69	7.41	6.81
Mj_1_GCCAAT_L005_R1_001_(paired)_trimmed_(paired)_contig_2764	17.98	23.47	12.96	13.12	19.04	1.04	31.3
TR60897|c0_g1_i2	20.46	24.55	14.1	13.51	19.21	1.21	32.04
Mj_1_GCCAAT_L005_R1_001_(paired)_trimmed_(paired)_contig_12431	10.04	5.22	9.93	3.76	9.24	1.69	6.83
TR55776|c0_g1_i1	6.83	2.34	2.98	46.15	57.17	53.8	21.27
TR71489|c0_g1_i1	9.24	1.35	1.89	45.51	55.73	45.38	21.17
Mj_1_GCCAAT_L005_R1_001_(paired)_trimmed_(paired)_contig_32151	0.9	1.12	1.14	2.54	3.03	7.9	0.82
TR70393|c0_g2_i1	2.78	1.96	1.35	3.43	5.83	3.74	3.78
Mj_1_GCCAAT_L005_R1_001_(paired)_trimmed_(paired)_contig_19471	0.05	0.3	11.61	19.48	9.6	58.32	0.76
TR75066|c0_g1_i1	0.31	0.45	14.6	34.59	17.49	90.54	2.35
Mj_1_GCCAAT_L005_R1_001_(paired)_trimmed_(paired)_contig_16928	5.93	8.02	12.77	12.98	16.13	10.37	6.2
TR61470|c1_g1_i1	9.55	9.26	8.48	20.67	21.03	26.27	23.57
TR63449|c0_g1_i1	0.7	0.56	1.83	7.86	7.49	11.07	1.7
TR78530|c0_g1_i3	8.66	8.55	7.36	11.61	9.69	24.87	8.93
TR49307|c0_g1_i1	1.27	3.26	4.59	9.38	1.55	44.19	1.97
TR55492|c0_g1_i3	0	0.4	1.8	2.43	1.04	7.27	3.57
TR70324|c0_g1_i1	16.52	17.65	27.59	31.97	28.51	30.5	20.27
TR69357|c1_g1_i2	4.14	3.24	2.83	3.19	4.71	5.73	3.17
TR71855|c0_g1_i1	11.16	8.85	13.81	14.3	23.6	25.47	20.66
TR72615|c0_g1_i1	12.32	11.24	20.39	25.69	27.27	29.58	14.42
TR66284|c0_g2_i1	5.8	8.98	13.11	10.34	16.37	13.02	7.94
TR65604|c0_g1_i1	4.08	3.8	4.8	4.97	6.12	6.38	4.97
TR56868|c0_g1_i3	10.73	7.8	17.26	20.34	24.45	24.01	14.34
TR56868|c0_g1_i5	12.75	7.64	16.55	25.17	27.7	25.92	17.44
TR56868|c0_g1_i6	8.29	4.55	10.69	19.91	19.52	19.29	9.22
TR56932|c0_g1_i1	12.44	7.51	18.42	28.17	28.65	28.88	18.84
scaffold14217	9.57	6.14	12.49	19.21	20.8	16.8	11.57
scaffold14218	7.09	3.75	8.11	13.04	16.3	14.49	8.77
TR77248|c0_g1_i1	5.49	5.89	7.18	11.12	9.53	22.36	9.1
TR58543|c0_g1_i2	111.14	74.95	105.93	95.51	107.97	63.68	107.48
TR72403|c0_g1_i4	2.2	2.21	2.54	3.77	6.17	4.39	3.18
Mj_1_GCCAAT_L005_R1_001_(paired)_trimmed_(paired)_contig_13063	12.19	13.54	15.08	29.97	24.44	49.17	20.88
TR76864|c0_g1_i1	6.68	8.01	9.41	12.49	9.51	18.52	10.54
TR76864|c0_g1_i4	6.98	6.58	9.35	10.93	9.22	16.92	10.41
C944054	1.92	6.49	7.3	10.78	20.76	25.41	12.67
TR74311|c2_g1_i1	1.63	6.65	7.26	9.24	25.61	30.66	16.07
TR74311|c2_g1_i4	3.23	5.94	7.6	9.35	21.08	26.04	11.27
TR74311|c2_g1_i9	2.39	5.75	6.61	8.6	22.75	21.87	11.19
TR69670|c0_g1_i2	1.01	2.78	2.69	2.73	4.57	6.37	2.82
TR69670|c0_g1_i3	1.38	2.33	2.68	4.39	3.06	5.14	3.31
TR77869|c0_g1_i1	22.19	27.87	39.54	47.58	36.41	61.24	32.11
TR76328|c1_g1_i5	2.21	2.24	2.72	4.48	5.43	4.54	2.38
TR75778|c3_g1_i1	5.98	5.81	5.71	5.38	5.41	3.26	7.46
TR75778|c3_g1_i3	9.18	6.92	8.67	11.08	15.28	13.82	10.56
TR77719|c1_g6_i1	8.17	5.45	7.38	3.31	6.8	2.95	6.17
TR77719|c1_g6_i2	8.72	5.77	9.99	10.91	17.42	13.97	12.17
TR59484|c0_g2_i1	6.83	3.43	5.08	5.03	9.88	13.74	6.31
TR59484|c0_g2_i3	6.5	2.53	1.95	5.07	5.88	12.66	5.25
Mj_1_GCCAAT_L005_R1_001_(paired)_trimmed_(paired)_contig_9759	5.46	3.8	5.81	7.95	8.9	8.53	6.47
TR59698|c0_g1_i1	11.42	11.01	13.21	16.33	14.52	19.54	15.31
TR59698|c0_g1_i2	11.79	12.39	13.05	15.89	14.93	21.82	17.24
Mj_1_GCCAAT_L005_R1_001_(paired)_trimmed_(paired)_contig_28601	5.03	1.51	38.56	56.46	5.59	80.98	5.72
TR66974|c0_g1_i1	0	0	0.44	36.07	20.88	44.63	0
TR58767|c0_g1_i1	0	0	0	32.29	19.81	34.1	0
TR55092|c0_g1_i1	0	0	0	14.8	9.09	28.74	0
TR56367|c0_g1_i1	0	0	0	15.77	8.55	27.25	0
Mj_1_GCCAAT_L005_R1_001_(paired)_trimmed_(paired)_contig_85512	0	0	0	12.72	4.9	15.77	0
Mj_1_GCCAAT_L005_R1_001_(paired)_trimmed_(paired)_contig_90384	0	0	0	5.17	1.87	7.5	0
TR58582|c0_g1_i1	0.19	0	0.11	46.87	17.39	52.18	0.09
Mj_1_GCCAAT_L005_R1_001_(paired)_trimmed_(paired)_contig_89717	0	0	0	2.53	0.6	8.25	0
TR50841|c0_g2_i1	0	0	0	5.04	1.11	8.7	0
scaffold12049	0	0	0	1.99	0	5.23	0
TR57281|c0_g1_i1	0	0	0	4.67	3.55	7.91	0
TR57281|c1_g1_i2	0	0	0	4.26	2.1	8.3	0
TR51130|c0_g1_i1	2.27	0.6	2.38	6.61	1.13	5.75	3.11
TR69177|c0_g1_i2	9.4	7.71	12.17	17.64	15.62	24.36	15.1
TR66683|c1_g1_i2	3.85	2.71	3.58	2.89	5.74	5.16	3.99
Mj_1_GCCAAT_L005_R1_001_(paired)_trimmed_(paired)_contig_186	1.75	3.47	3.52	2.55	4.05	5.53	3.39
TR57191|c0_g1_i1	2.55	3.05	4.92	4.07	5.69	7.61	2.65
TR57191|c0_g1_i3	3.94	4.12	3.97	4.84	5.75	9.48	3.84
TR71064|c1_g1_i1	4.85	4.51	5.33	5.01	6.33	7.5	4.43
TR71064|c1_g1_i2	3.24	3.62	3.95	3.89	5.47	7.55	3.26
TR71064|c1_g1_i3	2.67	2.29	3.14	3.42	3.22	6.42	2.89
TR71064|c1_g1_i4	2.05	2.85	3.32	4.49	4.86	7.51	2.79
Mj_1_GCCAAT_L005_R1_001_(paired)_trimmed_(paired)_contig_205	5.02	6.77	10.03	18.18	26.87	41.2	5.5
TR57379|c0_g1_i1	2.13	3.11	2.26	9.61	9.06	12.59	5.75
TR57379|c0_g1_i2	2.21	2.1	2.23	13.93	13.49	14.24	4.13
TR65533|c1_g1_i3	4.47	4.95	5.14	7.43	8.42	9.15	3.14
scaffold1287	1.31	1.38	1.6	4.12	4.23	5.52	0.94
TR78476|c1_g1_i4	3.64	2.44	4.07	6.06	2.17	5.65	4.48
TR79546|c1_g2_i5	6.03	3.32	4.78	7.56	3.48	6.45	5.38
TR78619|c0_g3_i1	3.33	2.35	3.07	6.16	7.65	8.85	3.82
TR78619|c0_g3_i5	2.42	1.38	2.56	4.81	4.89	6.86	1.91
TR78826|c0_g1_i2	2.17	1.98	2.49	4.37	5.27	6.91	2.21
TR66237|c0_g1_i1	2.36	1.42	3.15	7.27	0.71	10.7	1.87
TR61180|c0_g1_i2	27.97	26.73	68.41	134.18	200.81	403.73	116.35
Mj_1_GCCAAT_L005_R1_001_(paired)_trimmed_(paired)_contig_770	9.57	10.74	11.88	13.36	11.62	15.38	11.61
TR71150|c1_g1_i3	17.37	17.34	27.11	25.23	24.2	30.79	18.17
TR67209|c1_g1_i1	5.45	5.8	8.67	7.65	9.39	9.94	5.85
TR70231|c2_g1_i1	4.53	4.27	5.76	6.08	5.99	9	6.21
TR70231|c2_g1_i3	5.41	4.7	5.41	6.34	7.82	8.71	6.59
TR78444|c3_g2_i3	2.54	2.81	3.62	3.83	3.8	5.5	3.04
Mj_1_GCCAAT_L005_R1_001_(paired)_trimmed_(paired)_contig_4442	2.66	2.62	3.82	5.59	5.76	7.28	4.39
TR69380|c0_g1_i3	6.93	6.28	8.75	11.69	11.08	14.93	11.22
TR69380|c0_g1_i4	6.75	6.72	9.03	11.11	11.86	11.53	9.76
TR69724|c0_g1_i3	8.42	7.08	9.59	12.27	14.51	17.03	10.5
Mj_1_GCCAAT_L005_R1_001_(paired)_trimmed_(paired)_contig_1797	4.02	5.3	2.84	1.2	1.45	0.36	3.6
Mj_1_GCCAAT_L005_R1_001_(paired)_trimmed_(paired)_contig_10939	3.17	4.17	6.93	12.11	9.3	12.07	8.18
TR58674|c0_g1_i1	4.54	4.86	7.82	14.04	11.8	12.54	11.11
TR78392|c1_g1_i1	1.95	2.1	7.75	11.96	11.98	10.78	5.76
TR62076|c0_g1_i1	1.28	0.61	0.86	32.35	23.22	22.85	8.41
TR63782|c0_g1_i2	3.4	2.88	4.2	6.11	0.57	15.55	3.95
TR63782|c0_g1_i1	4.12	3.32	6.6	6.84	0.6	15	5.03
scaffold10693	0.42	0.13	1.48	5.19	7.35	11.38	1.56
Mj_1_GCCAAT_L005_R1_001_(paired)_trimmed_(paired)_contig_15109	0.52	0.39	1.52	8.18	11.37	15.1	2.25
TR66168|c0_g1_i1	0.62	0.79	2.13	9.57	14.01	18.66	1.69
TR66168|c0_g1_i2	1.15	0.77	1.92	4.76	5.91	9.61	1.74
Mj_1_GCCAAT_L005_R1_001_(paired)_trimmed_(paired)_contig_16501	7.86	11.54	11.18	1.31	0.79	1.75	7.54
TR78504|c1_g2_i1	5.03	4.28	5.47	4.32	7.09	6.13	5.97
TR79427|c2_g2_i1	3.16	2.91	3.26	3.1	4.21	6.44	5.02
TR56850|c1_g1_i1	0.8	0	1.88	18.2	2.86	17.33	0.16
TR57017|c0_g3_i1	0.29	0.18	3.76	24.61	2.76	29.72	0
TR57017|c0_g3_i2	0.71	0.34	3.54	27.46	2.64	30.37	0
TR71155|c6_g1_i1	7.97	8.52	2.7	1.01	1.63	0.15	5.7
TR71155|c6_g1_i2	7.31	7.96	1.8	0.81	1.02	0.19	5.86
scaffold10549	5.01	5.23	2.27	1.07	1.16	0.64	3.42
TR61021|c0_g1_i1	8.36	7	2.49	2.55	1.01	2.26	8.09
TR72658|c0_g2_i5	2.55	2	2.12	3.58	3.27	8.61	1.85
TR72965|c0_g1_i12	1.53	2.46	2.25	3.18	3.58	7.59	3.07
TR73828|c0_g1_i1	2.3	3.51	2.83	6.07	4.96	9.37	4.65
TR71976|c0_g1_i1	4.6	3.47	3.76	5.01	4.38	7.14	5.05
TR74305|c0_g2_i1	7.29	7.44	7.6	13.25	11.02	13.47	9.8
TR74408|c0_g1_i1	3.14	1.66	2.64	4.48	4.23	5.82	2.34
C949768	0.13	0.12	0.9	1.42	0.38	6.66	1.63
Mj_1_GCCAAT_L005_R1_001_(paired)_trimmed_(paired)_contig_9793	5.07	4.09	7.09	6.44	8.77	9.51	5.07
TR55070|c0_g1_i1	18.1	17.66	24.39	22.13	33.06	30.78	20.81
Mj_1_GCCAAT_L005_R1_001_(paired)_trimmed_(paired)_contig_9124	6.69	7.41	8.84	2.91	2.75	3.06	5.25
TR75815|c0_g1_i1	7.59	10.54	9.86	3.5	3.21	2.13	5.11
Mj_1_GCCAAT_L005_R1_001_(paired)_trimmed_(paired)_contig_19479	4.33	5.9	3.64	0.49	0.69	0.17	1.07
TR72502|c1_g1_i1	6.61	5.63	6.92	6.57	9.3	13.57	7.85
Mj_1_GCCAAT_L005_R1_001_(paired)_trimmed_(paired)_contig_557	4.67	3.58	3.45	4.8	3.63	7.21	4.23
TR78158|c0_g1_i1	12.45	10.54	7.19	16.82	10.27	23.7	10.38
TR79470|c0_g3_i1	4.4	3.55	3.22	4.63	4.37	7.97	3.98
TR79470|c0_g3_i6	3.74	3	4.2	5.46	4.85	9.02	3.67
TR79515|c0_g2_i6	3.65	3.41	3.28	5.96	5.27	8.75	4.17
TR79515|c0_g2_i7	3.41	2.5	2.29	4.43	3.96	6.88	3.67
Mj_1_GCCAAT_L005_R1_001_(paired)_trimmed_(paired)_contig_4417	78.25	67.5	118.7	184.3	139.2	260.59	86.01
TR74376|c1_g3_i8	3.99	1.98	4.7	7.04	2.88	6.4	4.52
TR78198|c0_g1_i2	2.93	2.4	1.92	4.45	6.35	9.04	3.7
TR78198|c0_g1_i3	2.47	2.13	2.21	6.35	5.8	8.49	3.71
TR78198|c0_g2_i3	2.14	2.63	1.76	5.79	6.01	10.3	3.19
TR78198|c0_g2_i5	6.8	6.04	5.23	12.26	19.58	23.32	11.82
TR78198|c0_g2_i7	2.37	2.62	1.32	6.14	8.03	10.67	4.92
TR78396|c3_g1_i10	2.59	2.37	2.56	6.75	4.66	9.1	4.09
TR78396|c3_g1_i5	3.68	4.02	4.23	9.94	10.76	12.8	7.57
TR78396|c3_g1_i6	2.58	2.66	2.34	4.92	7.3	8.13	4.29
TR78396|c3_g1_i7	2.5	2.24	1.96	4.95	7.18	8.46	4.35
TR78396|c3_g1_i8	2.79	2.71	2.79	6.15	6.83	9.07	3.91
TR67927|c0_g2_i2	3.48	3.84	3.11	5.21	2.51	4.74	5.78
Mj_1_GCCAAT_L005_R1_001_(paired)_trimmed_(paired)_contig_6157	5.61	6.97	3.39	9.18	1.52	17.1	1.54
TR78332|c1_g2_i2	3.05	2.53	3.82	4.82	2.12	7.87	2.2
TR78332|c1_g2_i5	0.48	0.64	2.18	10.64	1.83	24.4	0.63
TR78332|c1_g2_i7	0	0.25	0.61	3.89	0	12.31	0
TR79188|c0_g1_i2	1.45	1.26	2.31	6.32	1.41	14.97	1.76
TR76743|c1_g1_i6	1.23	2.61	4.51	3.48	5.12	5.17	2.29
Mj_1_GCCAAT_L005_R1_001_(paired)_trimmed_(paired)_contig_16073	2.48	3.18	8.61	12.57	15.75	13.04	5.63
TR67338|c1_g1_i1	3.83	4.06	10.23	17.36	19.56	22.41	9.51
TR79705|c1_g3_i1	5.63	4.61	2.08	0.77	0.72	0.36	4.28
TR74825|c0_g2_i6	2.26	0.9	1.55	4.18	5.06	4.38	1.86
TR74983|c0_g1_i4	2.55	2.34	4.99	5.45	7.95	5.7	4.73
TR74983|c0_g1_i6	2.38	1.67	3.53	3.88	5.27	3.98	3.36
Mj_1_GCCAAT_L005_R1_001_(paired)_trimmed_(paired)_contig_12749	3.52	1.37	3.8	11.55	12.62	15.06	2.84
TR58667|c0_g1_i2	3.58	1.1	2.42	6.46	6.57	9.23	2.24
TR65255|c0_g2_i4	0	0	0.41	3.6	0	5.03	0
TR65255|c0_g2_i5	0	0	0.27	3.6	0	5.41	0
TR73903|c3_g1_i2	8.14	8.75	6.59	3.5	6.59	4.14	6.02
TR73903|c3_g1_i3	1.81	1.95	3.46	2.51	5.05	4.25	2.67
TR75668|c0_g1_i6	9.8	17.24	25.34	21.64	18.24	23.51	14.78
TR61818|c0_g1_i5	3.37	6.14	9.55	8.01	9.15	9.17	5.43
TR62869|c0_g1_i1	389.03	431.53	469.71	384.36	245.87	271.43	352.84
Mj_1_GCCAAT_L005_R1_001_(paired)_trimmed_(paired)_contig_350	16.85	16.67	13.03	13.15	9.56	5.39	16.65
TR57400|c0_g1_i1	19.25	15.63	11.14	10.43	7.16	5.32	15.42
TR57400|c0_g1_i3	10.53	9.96	8.1	8.63	4.76	2.44	9.62
TR57400|c0_g1_i4	10.19	10.43	7.37	8.12	4.26	2.45	10.26
TR57421|c0_g1_i1	46.86	47.08	48.49	39.68	35.36	15.46	50.89
TR74611|c0_g1_i1	0	0.64	1.63	12.75	2.23	8.34	2.56
TR69939|c1_g1_i5	0	0	1.25	12.12	3.15	10.21	4.42
scaffold14107	0.09	0	0.22	6.15	0.97	3.89	1.27
TR73848|c0_g1_i1	2.22	3.39	2.38	3.45	2.64	5.07	2.31
TR73848|c0_g1_i2	2.77	3.92	2.65	4.51	3.51	5.09	3.02
TR73848|c0_g1_i6	3.53	3.83	3.86	3.86	4.73	5.68	3.96
TR54235|c0_g2_i1	6.96	8.54	9.74	7.58	16.86	14.2	12.85
TR66584|c0_g1_i1	51.99	46.93	49.86	265.35	404.46	1008.41	132.17
TR51240|c0_g1_i2	0.27	0.39	0.32	2.82	0.61	5.76	0.4
Mj_1_GCCAAT_L005_R1_001_(paired)_trimmed_(paired)_contig_2929	9.53	7.4	7.22	14.09	13.75	16.48	7.48
TR79494|c2_g2_i1	5.6	4.7	4.71	12.06	10.57	13.62	7.89
TR60418|c0_g2_i1	8.41	8.53	3.74	15.88	22.51	19.33	7.65
TR60418|c0_g2_i2	5.44	5.58	2.51	13.86	17.57	13.52	6.91
scaffold10244	4.62	5.41	3.24	11.84	15.49	12.61	5.93
TR69235|c0_g1_i2	5.76	4.77	4.56	4.06	4.67	2.42	3.36
TR70386|c0_g1_i1	7.21	9.29	7.98	5.35	6.45	5.2	6.33
TR70386|c0_g1_i4	7.93	10.31	8.38	5.92	7.07	3.94	6.61
TR67359|c2_g1_i3	4.58	4.57	5.52	11.93	7.81	14.49	4.53
TR67359|c2_g1_i4	3.56	4.35	7.36	11.57	8.08	15.07	6.78
TR67359|c2_g1_i5	3.52	4.49	7.38	13.24	8.47	17.13	6.13
TR64518|c0_g1_i1	0.52	0.5	1.77	7.29	0.59	9.85	0.58
TR59264|c0_g2_i1	8.09	4.09	5.97	5.79	9	4.22	8.91
TR65686|c2_g1_i1	9.92	8.78	10.95	6.73	7.5	4.89	10.48
TR74915|c0_g1_i6	4.81	5.14	3.51	3.02	2.54	4.39	4.48
TR65263|c0_g1_i2	7.7	20.05	40.51	98.83	46.51	95.6	43.65
TR72385|c0_g1_i1	3.11	8.76	33.63	42.4	26.38	68.24	7.68
TR72385|c1_g1_i1	1.96	6.78	11.95	23.37	13.47	35.44	4.58
scaffold13980	125.56	143.77	146.48	103.72	90.83	79.03	81.24
TR66163|c0_g1_i1	186.46	154.65	184.94	60.35	53.55	49.24	190.32
TR76005|c0_g1_i1	20.68	19.15	29.29	50.64	43.94	69.28	25.8
TR62827|c0_g5_i1	8.13	13.35	7.93	1.47	3.46	3.34	9.83
TR58007|c0_g2_i1	16.13	8.99	10.57	14.88	13.06	20.42	11.86
TR78472|c1_g2_i3	2.14	1.75	2.57	2.09	4.09	5.67	3.24
TR78238|c0_g1_i3	2.27	3.14	2.97	5.18	6.37	7.24	4.71
TR78397|c0_g1_i2	5.09	3.37	4.86	5.88	10.75	8.47	6.27
Mj_1_GCCAAT_L005_R1_001_(paired)_trimmed_(paired)_contig_4042	11.38	16.06	10.86	24.35	31.94	23.26	18.82
scaffold13343	14.29	10.83	13.76	20.44	14.45	30.75	12.18
Mj_1_GCCAAT_L005_R1_001_(paired)_trimmed_(paired)_contig_3993	6.35	7.7	10.7	13.51	9.47	14.38	12.64
TR56192|c1_g1_i1	4.44	4.38	6.95	11.22	8.38	11.18	8.87
TR56192|c1_g1_i3	4.63	6.45	5.77	11.76	6.01	9.82	8.18
TR56192|c1_g1_i4	3.93	4.6	8.12	10.87	6.65	12.32	8.3
TR56192|c1_g1_i6	4.47	6.59	6.86	10.76	6.29	10.54	10.02
TR79177|c2_g1_i2	16	21.85	32.65	41.54	33.38	44.6	29.19
TR73609|c2_g1_i4	3.87	3.26	3.03	4.05	2.67	9.48	4.41
Mj_1_GCCAAT_L005_R1_001_(paired)_trimmed_(paired)_contig_42367	1.34	1.93	3.42	4.95	3.66	9.64	6.6
TR56171|c0_g1_i2	42.39	43.45	49.9	64.21	43.62	60.08	46.12
TR57826|c0_g1_i3	18.2	18.34	22.98	28.99	22.8	30.62	24.14
TR57826|c0_g1_i4	28.39	26.26	31.68	38.53	32.4	33.1	24.68
TR72944|c0_g1_i1	11.22	9.09	17.44	36.26	42.39	39.2	18.7
scaffold1045	5.75	3.88	8.16	13.94	17.93	17.62	7
Mj_1_GCCAAT_L005_R1_001_(paired)_trimmed_(paired)_contig_8815	17.96	14.89	25.43	80.97	52	123.31	31.27
TR76795|c1_g2_i1	0.23	0.64	0.84	2.16	2.09	6.04	3.42
TR62782|c1_g1_i1	0.86	0.9	2.54	8.93	12.04	9.9	10.65
Mj_1_GCCAAT_L005_R1_001_(paired)_trimmed_(paired)_contig_24321	0.52	3.47	55.33	27.74	57.96	122.24	1.02
Mj_1_GCCAAT_L005_R1_001_(paired)_trimmed_(paired)_contig_11810	12.24	9.98	15.3	32.79	23.85	28.89	25.68
TR67492|c0_g1_i1	12.08	9.49	15.57	25.45	22.56	28.95	21.73
TR67492|c0_g1_i2	16.34	12.42	20.45	36.22	33.38	39.7	26.49
Mj_1_GCCAAT_L005_R1_001_(paired)_trimmed_(paired)_contig_16246	2.43	1.54	0.71	11.42	0.3	24.43	1.6
TR71129|c0_g3_i1	0	0	0	7.21	0	23.37	0
TR71129|c0_g3_i2	0	0	0	6.67	0	23.93	0
TR71247|c0_g1_i1	4.92	3.91	1.77	13.92	0.43	35.57	1.37
TR71247|c0_g1_i2	6.02	2.68	1.08	13.55	0.69	34.52	2.78
TR72467|c0_g2_i1	4.4	2.76	1.2	11.46	0.65	28.82	1.65
TR59467|c0_g1_i1	17.74	17.65	11.22	7.23	4.65	11.47	12.47
TR68644|c1_g1_i2	42.95	47.23	27.59	17.56	17	29.46	29.65
TR54982|c0_g1_i1	4.74	10.64	12.47	30.13	38.27	32.34	42.3
TR51097|c0_g1_i2	7.15	11.88	10.04	62.11	85.38	70.66	17.57
TR54094|c0_g1_i1	2.2	7.43	6.39	21.2	14.05	44.82	10.86
TR54094|c0_g1_i2	0.46	4.28	2.91	21.58	14.55	48.01	7.16
TR55584|c0_g1_i1	4.3	14.36	14.87	39.27	20.71	67.48	24.39
TR55584|c0_g1_i2	1.3	7.16	10.69	24.49	12.72	39.54	11.23
TR51344|c1_g1_i1	2.75	2.23	6.72	8.1	7.48	10.55	3.92
TR77752|c0_g1_i1	34.1	31.46	38.04	4.96	11.17	2.2	31.97
TR67095|c1_g1_i1	5.95	4.78	6.78	11.53	9.89	9.93	6.42
Mj_1_GCCAAT_L005_R1_001_(paired)_trimmed_(paired)_contig_2523	10.69	10.94	14.16	24.85	26.95	28.02	16.91
TR67040|c1_g1_i1	9.92	11.59	15.05	25.03	27.83	25.73	16.83
scaffold1449	4.56	3.53	6.82	11.56	13.29	10.28	7.42
scaffold1450	3.21	3.71	6.61	10.9	12.05	10.68	7.87
TR75128|c0_g1_i2	8.44	7.74	7.05	2.92	1.75	1.81	5.67
TR75128|c1_g1_i1	7.63	6.5	5.88	2.52	1.98	1.71	3.73
scaffold13930	3.09	5.04	8.93	14.18	7.41	12.98	6.88
Mj_1_GCCAAT_L005_R1_001_(paired)_trimmed_(paired)_contig_11055	4.74	3.97	4.75	7.47	5.99	6.8	4.31
TR68705|c0_g3_i8	2.95	2.71	3.48	4.55	5.27	6.65	3.66
TR78783|c0_g2_i12	3.4	4.6	6.64	9.15	6.67	9.37	5.06
TR78783|c0_g2_i2	2.95	4.77	6.59	9.04	6.19	10.12	5.6
TR78783|c0_g2_i6	3.91	5.15	7.8	11.23	8.26	11.44	6.45
TR78783|c0_g2_i9	3.89	5.34	7.8	9.61	7.01	9.53	5.23
TR77760|c0_g1_i15	2.35	5.93	2.44	0.72	0.68	0.2	3.75
TR77760|c0_g1_i9	5.56	5.82	2.9	0.38	1.79	0.62	4.63
Mj_1_GCCAAT_L005_R1_001_(paired)_trimmed_(paired)_contig_4065	35.12	31.83	96.68	164.59	156.44	134.39	75.18
TR72970|c1_g2_i4	1.27	2.15	1.66	3.71	3.71	6.54	1.67
Mj_1_GCCAAT_L005_R1_001_(paired)_trimmed_(paired)_contig_9152	1.14	0.96	1.93	2.01	4.92	5.34	3.36
TR75868|c1_g1_i2	12.33	10.96	7.9	3.5	4.64	3.96	8.68
TR77292|c0_g1_i3	10.76	11.17	7.63	3.82	4.49	2.96	8.02
TR77292|c0_g1_i7	6.97	6.15	5.76	1.65	4.21	2.43	4.83
Mj_1_GCCAAT_L005_R1_001_(paired)_trimmed_(paired)_contig_18119	8.55	8.84	12.87	13.08	13.57	25.46	12.18
Mj_1_GCCAAT_L005_R1_001_(paired)_trimmed_(paired)_contig_17254	2.49	2.25	3.75	3.52	5.39	8.62	2.87
TR79047|c0_g1_i1	4.04	4.41	5.81	8.88	9.11	16.41	6.57
TR79047|c0_g1_i2	1.76	1.57	1.41	3.62	2.39	5.71	1.74
TR44224|c1_g1_i1	8.01	7.8	46.93	26.67	17.95	148.88	4.74
TR72816|c1_g8_i1	31.73	31.11	34.63	37.84	34.39	39.16	31.84
TR78709|c0_g3_i4	0.21	0.54	6.32	9.32	10.22	8.79	1.56
TR58844|c0_g1_i1	10.99	12.17	25.4	47.19	44.47	40.4	24.36
TR58844|c0_g1_i2	9.51	12.92	26.21	34.75	39.96	39.51	20.68
Mj_1_GCCAAT_L005_R1_001_(paired)_trimmed_(paired)_contig_5039	4.09	4.14	4.49	7.66	9.26	10.18	7.2
TR72532|c0_g1_i1	3.79	3.98	5.65	7.65	8.74	9.84	7.53
TR65553|c1_g1_i2	8	10.82	12.32	14.14	22.51	24.63	10.04
TR76685|c1_g1_i10	5.19	10.25	14.32	11.86	25.47	21.64	8.48
TR76685|c1_g1_i2	8.52	18.03	22.26	22.63	34.45	27.39	13.48
TR62821|c1_g1_i1	40.19	33.35	48.74	71.81	55.94	104.46	66.26
Mj_1_GCCAAT_L005_R1_001_(paired)_trimmed_(paired)_contig_2862	20.23	44.8	23.91	165.62	19.13	150.23	67.6
TR65792|c0_g1_i2	17.02	52.25	19.49	93.12	16.11	98.27	41.58
TR65792|c0_g1_i3	18.63	51.78	23.34	116.99	19.43	106.27	49.68
TR76180|c0_g1_i1	7.35	5.66	8.12	7.2	7.53	11.5	7.76
TR76180|c0_g1_i2	9.22	6.13	8.01	7.48	8.43	11.28	8.18
TR76180|c0_g1_i3	3.82	3.85	5.51	5.25	7.39	8.9	5.14
TR76528|c0_g1_i4	7.82	6.32	7.1	7.06	8.97	11.74	6.69
TR59220|c0_g1_i3	0.44	0.63	0.77	4.14	0.32	9.17	2.79
TR68938|c0_g1_i1	10.62	14.11	10.45	6.72	3.45	4.85	11.78
TR64857|c0_g1_i1	4.57	4	4.3	7.08	6.49	11.27	6.38
TR64857|c0_g1_i3	2.62	2.98	3.5	4.62	3.94	9.4	3.06
TR77414|c1_g4_i2	3.49	5.44	3.86	5.54	4.75	10.82	5.42
TR76145|c0_g1_i3	32.84	23.89	32.08	30.84	30.18	39.93	32.8
TR59670|c0_g2_i1	164	142.97	177.8	15.27	16.64	11.06	47.41
TR67394|c0_g1_i1	23.37	20.33	21.65	54.48	46.45	97.34	15.6
TR62194|c0_g1_i1	44.02	48.46	58.76	51.5	74.86	73.91	61.53
TR53634|c0_g1_i1	22.26	26.01	28.64	8.61	13.93	6.73	21.54
TR53634|c0_g1_i2	14.56	15.32	16.02	7.57	8.85	4.66	9.3
TR61843|c0_g1_i1	2.16	0.94	5.71	50.02	21.17	43.14	12.12
Mj_1_GCCAAT_L005_R1_001_(paired)_trimmed_(paired)_contig_4108	3.01	1.43	3.3	2.65	5	4.99	2.67
TR64756|c0_g1_i1	2.35	2.64	1.26	12.11	7.69	13.48	7.23
TR67350|c0_g1_i1	1.93	1.28	4.77	12.91	13.04	11.19	11.95
scaffold14562	1.4	0.83	3.81	9.61	8.93	8	8.47
TR62399|c0_g1_i2	1.06	0.23	10.86	12.41	6.91	124.98	10.16
TR75625|c0_g1_i2	5.73	4.32	3.93	5.69	5	8.76	5.06
TR62321|c0_g1_i2	0	0.04	0.17	37.85	0.35	38.77	0.05
TR67487|c0_g5_i2	7.05	5.67	5.32	7.36	13.54	9.44	10.12
Mj_1_GCCAAT_L005_R1_001_(paired)_trimmed_(paired)_contig_51125	0.68	0.41	3.44	7.13	0.19	14.56	1.04
TR73177|c0_g1_i1	0.82	0.68	5.01	9.65	0	22.12	1.62
TR67073|c1_g5_i1	0.76	1.49	0.86	2.33	4.44	6.25	1.82
TR59345|c0_g1_i3	1.98	3.68	2.33	6.29	7.66	5.32	2.52
TR59573|c0_g1_i1	2.05	4.93	3.77	10.43	15.27	12.48	3.64
TR59573|c0_g1_i3	2.63	6.08	5.07	12.96	16.29	10.41	6.39
Mj_1_GCCAAT_L005_R1_001_(paired)_trimmed_(paired)_contig_8407	10.17	9.8	14.19	20.54	18.2	29.08	12.83
TR75229|c0_g1_i1	8.36	7.37	14.68	14.47	16.74	25.27	8.8
TR75229|c0_g1_i3	8.5	7.99	13.7	18.81	18.42	27.83	12.08
TR75455|c0_g1_i1	8.42	7.66	11.65	17.63	15.81	26.79	10.58
Mj_1_GCCAAT_L005_R1_001_(paired)_trimmed_(paired)_contig_7872	6.87	3.78	1.07	2.37	2.73	2.03	5.4
TR51697|c1_g1_i1	48.01	38.53	45.66	30.08	25.89	22.25	34.95
TR78658|c0_g1_i1	6.55	6.06	5.21	2.68	2.99	3.67	5.11
TR78658|c0_g1_i3	5.83	6.04	4.98	2.82	2.42	2.92	5.38
TR71910|c0_g1_i3	6.79	9.51	7.47	1.52	1.28	1.37	4.6
TR78138|c0_g1_i3	7.76	12.15	10.53	0.99	1.24	1.44	7.16
TR73930|c2_g1_i1	10.25	7.71	7.91	4.26	4.45	2.72	6.46
TR59104|c0_g1_i2	3.04	3.3	4.44	7.5	8.8	6.89	7.04
Mj_1_GCCAAT_L005_R1_001_(paired)_trimmed_(paired)_contig_1741	8.72	6.13	8.67	11.96	8.27	11.56	8.55
TR62193|c0_g1_i1	11.76	9.21	12.37	17.25	13.64	16.07	12.85
TR67356|c0_g1_i1	7.05	4.74	7.06	9.43	6.83	9.19	7.25
TR67356|c0_g1_i2	9.31	6.83	10.73	13.67	10.17	11.99	8.44
TR67356|c0_g1_i4	7.05	4.91	6.86	8.8	7.83	9.44	7.12
Mj_1_GCCAAT_L005_R1_001_(paired)_trimmed_(paired)_contig_7473	2.87	2.48	4.55	5.2	3.53	4.81	2.84
TR71848|c0_g2_i1	11.1	9.39	6.79	3.25	5.73	3.26	8.68
Mj_1_GCCAAT_L005_R1_001_(paired)_trimmed_(paired)_contig_25371	1.05	4	7.55	28.28	37.62	30.12	32.29
Mj_1_GCCAAT_L005_R1_001_(paired)_trimmed_(paired)_contig_15412	4.72	4.31	4.28	30.32	20.33	42.01	13.49
TR66887|c1_g2_i1	2.21	3.97	2.45	4.54	7.4	8.38	4.75
TR66887|c1_g2_i2	14.45	12.67	11.53	75.36	50.96	110.52	36.28
Mj_1_GCCAAT_L005_R1_001_(paired)_trimmed_(paired)_contig_5638	3.63	2.85	3.58	4.27	6.49	6.9	4.85
Mj_1_GCCAAT_L005_R1_001_(paired)_trimmed_(paired)_contig_31225	1.17	0.16	0.59	34.56	7.01	67.47	9.08
TR51162|c0_g1_i1	224.32	188.58	244.61	2.07	0.58	2.89	205.13
TR51162|c0_g1_i2	231.32	203.29	242.52	1	1.51	2.81	205.4
TR68720|c0_g2_i3	6.64	5.45	0.68	0	0	0	3.94
TR68720|c0_g1_i2	89.67	108.25	118.66	34.99	38.07	21.84	98.38
TR59263|c0_g1_i1	33	21.77	32.25	47.87	50.34	126.96	32.3
TR70481|c0_g1_i10	2.69	1.07	2.64	4.26	6.68	3.72	4.19
TR70481|c0_g1_i13	2.37	1.92	2.78	4.7	5.14	4.74	2.68
TR71383|c2_g3_i2	3.25	2.13	4.38	5.82	6.31	6.12	4.35
TR71383|c2_g3_i6	2.33	1.41	3.02	3.09	4.43	5.11	3.45
TR76248|c0_g1_i7	3.36	3.34	3.13	5.56	2.3	4.51	3.45
TR76248|c0_g4_i1	3.9	4.1	5.18	8.75	7.2	7.46	5.53
TR76248|c0_g4_i3	4.17	2.41	4.83	6.97	5.54	7.09	4.79
TR76248|c0_g4_i5	2.65	2.45	3.94	5.88	6.28	6.99	4.2
TR76248|c0_g4_i8	3.58	2.64	3.5	5.7	6.14	7.07	4.95
TR76248|c0_g4_i9	2.4	2.76	2.82	6.06	2.14	5.83	3.54
TR38235|c0_g1_i1	11.52	27.92	22.95	118.43	0.61	240.23	16.16
Mj_1_GCCAAT_L005_R1_001_(paired)_trimmed_(paired)_contig_9704	15.53	13.26	12.87	24.07	9	24.39	13.56
TR73042|c4_g1_i3	16.4	13.14	13.1	28.16	9.64	27.68	11.71
TR66733|c0_g1_i1	69.18	76.25	27	3.02	2.74	0.7	56.29
Mj_1_GCCAAT_L005_R1_001_(paired)_trimmed_(paired)_contig_8303	3.56	4.45	4.06	5.85	5.94	10.06	5.17
TR73910|c0_g1_i3	4.23	5.7	4.45	7.13	5.39	10.42	5
TR73910|c0_g1_i4	3.57	4.75	4.92	7.13	6.13	10.38	4.84
TR78891|c1_g1_i2	3.14	4.59	5.28	4.46	7.84	11.05	3.96
TR57203|c0_g1_i4	5.65	3.92	8.77	8.17	10.96	9.43	2.54
Mj_1_GCCAAT_L005_R1_001_(paired)_trimmed_(paired)_contig_23653	1.95	3.99	17.29	60.59	35.87	135.04	15.05
scaffold12955	1.83	3.09	13.84	46.15	27	103.61	12.14
scaffold13419	5.93	4.37	5.36	9.21	6.38	10.99	6.38
TR78549|c0_g2_i6	11.63	9.05	7.91	2.62	2.95	1.16	4.31
Mj_1_GCCAAT_L005_R1_001_(paired)_trimmed_(paired)_contig_45198	2.18	0.52	2.35	31.63	27.62	55.89	4.65
TR67974|c1_g1_i1	0.54	0.2	1.14	13.07	14.58	31.58	1.01
TR67974|c1_g1_i3	1.51	0.51	2.67	31.71	30.07	57.36	3.04
Mj_1_GCCAAT_L005_R1_001_(paired)_trimmed_(paired)_contig_20810	15.43	7.4	16.6	13.45	21.74	23.77	20.66
TR71018|c0_g2_i1	23.81	13.3	27.67	19.01	31.79	34.08	31.45
TR79441|c0_g1_i1	62.84	38.5	78.2	55.79	88.86	96.09	86.93
Mj_1_GCCAAT_L005_R1_001_(paired)_trimmed_(paired)_contig_31375	3.5	3.88	3.26	6.87	7.33	10.71	4.18
TR66679|c0_g1_i1	5.2	2.96	7.51	9.51	9.65	7.48	4.36
TR66679|c0_g1_i2	3.68	2.05	5.42	6.58	5.97	6.13	2.12
TR58728|c0_g1_i2	2.26	0.28	4.16	3.28	3.09	29.87	1.07
TR58728|c0_g1_i3	1.57	0	1.7	3.12	2.16	20.08	0.77
TR58728|c1_g1_i3	2.68	0.36	3.75	3.85	4.39	20.26	1.89
TR63243|c1_g1_i2	14.4	8.12	13.53	20.22	32.32	37.08	15.13
TR65253|c0_g2_i1	12.49	7.1	11.58	17.92	31.7	38.93	16.78
TR65253|c0_g2_i3	20.73	8.72	15.64	19.89	34.51	40.9	18.11
TR75022|c0_g3_i2	5.45	4.49	4.3	6.26	7.5	8.58	7.6
Mj_1_GCCAAT_L005_R1_001_(paired)_trimmed_(paired)_contig_4906	12.51	11.27	15.78	22.77	15.88	20.51	13.76
TR55416|c0_g1_i1	20.83	15.15	25.19	27.74	25.09	30.68	19.25
TR71126|c1_g1_i7	5.77	5.45	3.62	3.68	4.28	0.39	2.74
TR56634|c0_g1_i1	6.87	7.28	13.98	19.77	17.02	17.98	11.89
TR56634|c0_g1_i2	7.62	7.71	12.73	20.6	15.02	19.25	11.73
scaffold12869	1.12	2.75	3.46	5.54	6.97	7.34	3.6
TR50672|c0_g1_i1	1.18	0.1	0.06	6.28	1.39	7.26	0.15
TR66176|c0_g1_i2	0	0	0.28	3.22	0	11.41	0.82
TR70237|c0_g1_i1	0	0	0.84	4.18	0.54	6.65	6.14
TR68287|c1_g1_i3	1.21	2.06	2.01	4.25	4.71	6.79	2.56
TR68287|c1_g1_i7	1.76	2.62	3.41	2.99	4.09	5.86	3.09
TR70683|c1_g1_i7	2.49	2.13	3.43	3.77	4.63	5.18	4.3
TR71811|c1_g1_i1	1.04	1.57	1.36	5.16	7.18	6.99	2.55
TR78097|c0_g1_i2	7.74	3.96	4.83	7.23	7.94	11.24	7.72
TR60580|c0_g1_i6	3.87	2.81	5.21	6.72	6.02	8.15	2.78
TR61414|c0_g1_i1	3.47	2.65	5.13	7.15	6.23	6.37	2.22
TR61414|c0_g1_i4	3.85	2.26	5.06	7.56	7.42	6.65	1.96
TR63222|c2_g3_i1	6.88	7.44	11.71	21.45	17.99	25.27	15.61
TR63940|c0_g4_i2	7.01	5.91	9.07	24.2	14.41	22.73	14.33
C949296	15.09	12.8	9.87	4.1	4.44	1.29	7.13
Mj_1_GCCAAT_L005_R1_001_(paired)_trimmed_(paired)_contig_5751	8.29	8.12	9.87	14.3	11.37	18.68	10.75
TR76161|c0_g1_i1	17.33	15.16	21.21	28.86	24.06	38.17	18.96
TR52165|c0_g1_i3	5.55	7.27	7.3	7.39	3.48	4.88	8.41
TR33132|c0_g1_i1	0.19	0.18	0.44	7.39	1.39	11.79	1.47
Mj_1_GCCAAT_L005_R1_001_(paired)_trimmed_(paired)_contig_2363	3.99	3.46	6.57	10.57	6.64	8.39	5.6
TR69539|c0_g1_i1	6.75	6.22	10.05	12.35	11.57	13.95	7.71
TR73604|c1_g1_i6	1.65	1.44	2.02	4.71	3.3	6.28	2.51
TR79086|c0_g1_i4	5.08	4.54	5.62	6.44	7.95	11.63	6.69
TR66465|c3_g1_i1	0.26	0.58	3.88	12.84	5.86	70.84	2.14
TR66465|c3_g1_i2	0.22	0.21	3.09	12.56	4.39	70.09	1.73
TR66465|c3_g1_i3	0.15	0.35	2.97	12.64	5.01	77.67	3.08
TR66465|c3_g1_i4	0	0.39	3.95	10.82	4.67	75.03	2.67
TR66465|c3_g1_i5	0.08	0.6	4.87	12.94	4.34	73.94	2.78
TR66465|c3_g1_i6	0.21	0.2	3.93	13.18	4.7	73.77	1.99
TR57649|c0_g1_i1	32.19	23.28	25.1	8.07	13.81	4.15	19.31
Mj_1_GCCAAT_L005_R1_001_(paired)_trimmed_(paired)_contig_22941	2.45	0.28	2.72	7.33	0.86	5.13	1.71
TR50501|c0_g1_i1	18.9	19.91	32.09	63.54	42.68	105.12	28.95
TR51036|c0_g1_i2	17.81	17.74	23.21	55.95	40.72	94.25	23.08
Mj_1_GCCAAT_L005_R1_001_(paired)_trimmed_(paired)_contig_20509	0.6	0.62	1.22	46.27	29.8	46.14	18.09
TR49825|c0_g1_i1	5.78	10.12	6.7	73.05	98.71	149.81	15.19
TR52431|c0_g1_i1	0.43	0.41	1.66	5	3.09	3.38	6.1
Mj_1_GCCAAT_L005_R1_001_(paired)_trimmed_(paired)_contig_12114	8.12	6.23	5.71	28.36	25.55	57.46	10.47
TR68026|c0_g1_i1	10.05	8.92	6.84	36.09	30.59	71.05	13.66
TR52835|c1_g1_i1	4.07	10.79	8.34	7.41	17.12	29.6	4.9
Mj_1_GCCAAT_L005_R1_001_(paired)_trimmed_(paired)_contig_2291	17.74	21.06	14.46	10.73	9.17	10.11	9.04
Mj_1_GCCAAT_L005_R1_001_(paired)_trimmed_(paired)_contig_36859	0.3	0.07	0.18	6.4	1.12	2.41	6.32
Mj_1_GCCAAT_L005_R1_001_(paired)_trimmed_(paired)_contig_15074	7.64	7.34	13.65	19.91	18.46	17.12	15.51
TR77135|c5_g1_i1	12.09	10.44	20.01	26.62	26.63	24.18	20.21
TR64745|c0_g1_i1	7.33	7.82	5.73	11.65	13.64	12.67	8.05
Mj_1_GCCAAT_L005_R1_001_(paired)_trimmed_(paired)_contig_6428	6.43	5.31	12.15	16.17	11.54	20.19	12.08
C966490	1.46	1.52	1.15	8.08	6.79	9.53	3.71
Mj_1_GCCAAT_L005_R1_001_(paired)_trimmed_(paired)_contig_21969	1.47	0.76	1.45	7.83	5.63	8.77	3.83
TR60237|c0_g1_i1	1.55	0.74	1.89	5.85	4.55	9.7	3.94
TR68466|c0_g1_i2	3.6	3.49	2.09	6.23	6.06	9.13	2.84
TR69665|c0_g1_i2	3.98	3.22	5.1	4.92	7.76	10.06	3.93
Mj_1_GCCAAT_L005_R1_001_(paired)_trimmed_(paired)_contig_3338	30.8	46.91	29.93	10.1	13.74	1.49	37.62
TR74610|c0_g1_i4	58.29	92.38	56.85	26.82	43.73	8.73	56.59
TR56259|c1_g1_i1	9.77	11.15	7.62	3.61	3.74	1.52	5.72
TR56259|c1_g1_i2	4.82	6.2	4.94	1.56	3.08	2.19	5.2
TR78885|c1_g1_i1	0.78	1.06	2.58	3.93	3.88	5.71	3.08
TR79028|c2_g1_i2	1.41	0.87	2.74	5.3	7.27	6.64	5.09
TR79028|c2_g1_i5	2.02	1.44	4.81	6.72	6.84	7.25	5.04
TR79028|c2_g1_i7	0.99	0.82	2.57	5.35	4.63	6.19	3.57
TR79124|c0_g1_i4	2.78	3.8	4.93	5.78	3.36	8.73	3.47
Mj_1_GCCAAT_L005_R1_001_(paired)_trimmed_(paired)_contig_22164	6.3	9.19	16.63	9.17	14.62	30.34	8.18
TR72136|c0_g1_i2	2.31	2.55	5.03	5.36	6.38	11.64	5.79
TR79165|c0_g1_i2	2.29	2.7	3.44	4.27	3.79	8.62	2.81
TR71631|c0_g1_i2	9.6	8.76	7.9	11.75	11.54	16.97	10.26
TR71631|c0_g1_i3	8.44	5.7	6.14	8.65	9.28	14.54	7.27
TR71631|c0_g1_i4	4.82	5.18	4.55	7.21	7.59	12.5	5.58
TR76091|c0_g2_i4	0.91	0.81	2.28	2.99	1	6.22	2.63
TR78184|c2_g4_i2	10.36	10.44	9.87	0.1	0.19	0.14	5
TR78184|c2_g4_i5	6.86	7.64	5.45	0.09	0.09	0.13	3.25
TR78184|c3_g1_i1	8.95	9.01	6.23	0.09	0.17	0.26	3.96
Mj_1_GCCAAT_L005_R1_001_(paired)_trimmed_(paired)_contig_8376	7.8	6.19	8.53	11.25	9.68	14.72	9.52
TR78181|c0_g1_i3	7.69	5.3	8.93	10.29	9.91	13.51	8.64
TR78181|c0_g1_i4	7.39	5.42	8	7.73	8.98	13.9	8.22
TR67283|c0_g1_i1	3.02	3.74	5.02	7.33	3.18	6.5	3.68
TR69877|c0_g1_i2	1.61	0.77	0.44	1.28	1.37	6.89	0.85
TR71173|c1_g3_i5	3.17	1.61	0.87	2.02	1.43	9.88	1.67
TR78272|c1_g1_i1	4.48	3.95	5.4	5.58	5.7	7.08	6.06
TR70080|c2_g1_i1	2.29	2.32	2.03	3.97	3.13	5.33	2.71
TR70080|c2_g1_i3	2.79	2.4	2.27	4.36	4.03	5.81	2.49
TR70080|c2_g1_i4	2.77	2.39	1.47	3.27	5.23	6.08	3.18
TR61097|c0_g2_i1	5.61	5.35	11.73	9.83	14.58	11.21	4.63
TR61634|c0_g1_i1	1.16	1.15	2.23	4.41	2.41	9.75	2.49
Mj_1_GCCAAT_L005_R1_001_(paired)_trimmed_(paired)_contig_37432	3.28	4.56	1.78	6.59	3.41	11.21	2.69
TR57524|c0_g1_i3	19.53	10.71	18.93	35.13	27	33.33	9.62
TR54813|c1_g1_i1	9.94	10.83	12.43	10.38	13.8	20.88	11.79
Mj_1_GCCAAT_L005_R1_001_(paired)_trimmed_(paired)_contig_5850	4.41	3.67	7.28	16.25	16.59	16.53	14.74
TR61628|c0_g1_i1	10.1	9.31	18.49	28.32	46.43	42.16	24.38
TR61628|c0_g1_i4	8.53	7.77	17.21	29.82	38.79	33.6	24.06
TR79860|c1_g1_i2	5.02	4.32	2.91	2.18	1.76	1.22	4.28
TR44076|c0_g1_i1	7.4	6.97	11.66	16.32	19.77	18.84	7.91
TR44076|c0_g1_i2	12.09	9.52	12.62	24.28	18.9	22.06	12.15
scaffold10249	4.45	3.21	5.91	9.57	8.52	7.89	5.12
TR54597|c0_g1_i6	5.31	6.44	7.17	12.85	13.27	21.44	14.1
TR54597|c0_g1_i7	5.64	5.71	8.99	9.52	10.73	20.77	12.75
TR54597|c0_g1_i9	5.45	5.47	7.9	14.65	7.32	22.36	15.58
TR76560|c1_g1_i4	6.57	8.89	7.03	13.29	10.91	23.12	14.5
TR76195|c0_g1_i1	4.1	4.32	4.39	9.09	8.47	10.12	5.16
TR76195|c0_g1_i3	3.11	2.01	1.89	4.15	4.82	5.81	3.27
TR77013|c0_g1_i3	5.83	4.67	5.99	12.74	11.91	12.55	6.07
TR77013|c0_g1_i4	4.38	3.9	3.92	8.41	9.8	11.56	4.33
Mj_1_GCCAAT_L005_R1_001_(paired)_trimmed_(paired)_contig_13959	7.81	10.16	7.25	8.04	8.96	15.26	7.26
TR77411|c0_g2_i1	5.79	8.37	6.45	8.23	6.14	11.69	4.57
Mj_1_GCCAAT_L005_R1_001_(paired)_trimmed_(paired)_contig_10654	10.88	5.11	21.5	23.07	39.77	57.69	15.15
TR47957|c0_g1_i1	41.87	28.35	94.57	90.31	173.31	217.11	73.66
TR57786|c0_g1_i1	21.38	23.07	18.07	8.98	19.37	10.13	26.47
TR76918|c0_g1_i1	36.17	36	31.64	51.42	33.74	56.08	38.28
C924700	0.22	0	0.76	8.9	3.54	7.65	4.04
TR73756|c0_g2_i1	3.36	2.25	4.1	5.94	5.88	4.92	3.32
TR77167|c0_g1_i2	3.93	2.71	4.92	5.25	7.05	4.88	4.82
TR76626|c2_g1_i3	3.34	2.83	5.27	4.98	7.73	9.84	5.23
TR65379|c0_g1_i1	8.9	7.35	9.95	31.51	10.56	29.71	13.18
TR65379|c0_g1_i2	7.7	6.33	8.45	25.5	8.99	24.92	10.24
TR67072|c0_g2_i1	4.75	3.02	6.46	13.59	6.96	14.45	4.79
TR67072|c0_g2_i4	2.33	1.17	3.18	7.41	2.57	7.78	3.51
Mj_1_GCCAAT_L005_R1_001_(paired)_trimmed_(paired)_contig_1413	7.64	9.35	8.4	3.69	2.54	2.16	5.26
TR72873|c0_g1_i3	7.18	7.94	7.19	2.95	2.37	4.1	5.77
TR73008|c0_g1_i1	9.15	10.66	10	4.57	3.25	3.53	6.76
TR73008|c0_g1_i2	8.59	10.18	9.51	3.64	2.43	2.99	9.59
TR69594|c0_g1_i1	1	2.39	1.77	3.65	4.52	9.84	9.14
TR69594|c0_g1_i2	0.93	1.52	1.88	2.34	3.71	8.4	8.17
TR74616|c1_g1_i3	2.08	2.36	3.48	4.33	7.21	4.82	2.61
TR75772|c0_g1_i3	4.47	5.52	4.61	1.77	0.83	1.86	1.1
TR69310|c0_g1_i1	1.56	0.91	1.89	4.97	3.32	7.46	3.03
TR69310|c0_g1_i2	2.17	1.51	1.76	3.99	2.32	8.66	2.76
TR79123|c0_g2_i4	2.19	2.99	2.46	2.88	4.85	5.09	2.73
TR71233|c1_g1_i1	12.94	15.09	5.25	3.88	4.94	3.99	9.78
TR66094|c0_g1_i1	15.97	15.39	24.47	27.65	28.41	32.36	28.82
TR66094|c0_g1_i2	12.3	11.9	20.04	23.88	25.59	27.88	17.84
TR66408|c0_g3_i1	5.97	4.94	3.51	3.38	4.25	3.24	5.28
TR66408|c0_g3_i4	4.17	4.65	5	5.87	3.25	2.5	6.02
TR53926|c1_g1_i3	43.1	26.7	36.7	16.2	10.54	8.96	27.16
TR75334|c2_g1_i2	4.14	4.72	5.17	1.52	1.91	0.92	3.58
TR62072|c2_g1_i1	39.67	40.32	22.27	8.7	10.59	5.2	21.6
Mj_1_GCCAAT_L005_R1_001_(paired)_trimmed_(paired)_contig_4069	1.18	0.97	2.88	5.11	4.56	5.74	4.59
TR71091|c0_g2_i1	1.33	1.71	3.22	5.05	3.47	5.68	4.8
Mj_1_GCCAAT_L005_R1_001_(paired)_trimmed_(paired)_contig_754	9.35	3.27	5.33	10.46	19.19	21.66	17.53
TR78248|c1_g1_i1	9.1	3.17	4.62	13.2	13.34	17.91	18.36
TR75715|c0_g1_i3	16.84	14.39	23.86	22.86	37.93	25.25	27.16
Mj_1_GCCAAT_L005_R1_001_(paired)_trimmed_(paired)_contig_11374	5.65	4.48	3.75	9.41	8.49	9.24	6.72
TR70078|c1_g2_i13	7.38	6.83	6	14.56	10.68	13.94	9.28
TR70078|c1_g2_i9	8.1	7.27	6.44	15.12	12.32	14.41	10.34
TR71638|c1_g1_i6	2.72	2.54	1.85	3.26	5.12	4.91	2.85
TR68807|c1_g1_i2	44.75	42.07	43.88	62.8	47.99	76.38	55.63
TR68807|c1_g1_i4	53.27	48.46	52.21	75.04	59.47	92.86	68.27
TR70520|c1_g1_i1	4.09	5.21	6.71	1.04	2.42	1.02	4
Mj_1_GCCAAT_L005_R1_001_(paired)_trimmed_(paired)_contig_23487	0.9	0.64	3.96	14.1	2.69	42.71	1.22
Mj_1_GCCAAT_L005_R1_001_(paired)_trimmed_(paired)_contig_7331	1.3	0.57	3.54	6.37	3.15	25.77	0.59
TR76736|c0_g1_i3	0	0	0	1.29	0.41	7.82	0
TR76736|c1_g4_i1	9.08	5	6.48	9.64	4.85	14.17	8.53
TR76998|c0_g1_i11	2.08	0.95	2.65	3.24	1.95	6.91	2.27
TR76998|c0_g1_i14	2.27	1.52	2.67	2.98	2.47	7.25	2.51
TR76998|c0_g1_i15	3.15	1.72	3.2	3.42	2.94	6.29	3.26
TR76998|c0_g1_i2	2.6	1.45	3.22	2.79	2.97	6.56	2.7
TR76998|c0_g1_i3	2.79	1.39	2.29	3.23	2.98	7.33	2.2
TR76998|c0_g1_i4	2.65	1.93	4.4	6.94	5.02	18.3	4.69
TR76998|c0_g1_i9	2.19	1.78	3.52	2.98	1.76	7.35	2.4
TR76998|c0_g2_i1	1.48	0.59	8.56	16.26	7.01	58.24	0.97
TR76998|c0_g2_i2	0.51	0.61	3.02	9.39	4.23	31.42	0.63
TR77852|c0_g1_i10	36.11	27.14	24.85	48.48	34.13	70.35	40.39
TR61018|c3_g1_i4	5.21	7.39	8.98	1.92	3.63	1.21	7.17
Mj_1_GCCAAT_L005_R1_001_(paired)_trimmed_(paired)_contig_23807	1.32	1.08	2.22	2.09	3.66	6.47	3.9
TR79785|c1_g1_i3	4.38	5.22	6.47	12.09	13.97	22.33	10.72
scaffold13713	0.66	1.88	2.21	4.34	6.07	7.12	4.09
TR65034|c1_g1_i2	14.43	8.31	7.85	15.58	9.25	21.37	12.17
TR78105|c2_g2_i2	6.66	4.61	5.15	7.4	7.53	14.78	6.4
TR78105|c2_g2_i3	7.63	5.18	8.91	11.96	9.1	15.47	7.96
TR78105|c2_g3_i3	2.37	0.38	2.09	2.81	3.82	5.9	2.91
TR78746|c1_g2_i2	8.61	5.54	8.78	7.11	7.42	13.99	9.26
TR78746|c1_g2_i3	8.17	4.82	6.98	7.9	7.41	13.27	8.5
TR78746|c1_g2_i6	1.81	1.93	2.44	1.76	3.65	6.86	3.71
scaffold14029	8.5	6.85	4.94	8.51	7.48	12.85	7.94
scaffold14030	6.8	4.95	4.1	8.3	4.93	12.68	5.79
scaffold14031	2.02	1.78	1.85	4.06	3.71	7.02	2
TR57076|c0_g1_i1	1.68	2.2	4.46	12.51	5.37	21.44	4.78
TR74339|c0_g4_i1	8.45	4.61	10.47	12.97	12.98	12.85	7.82
TR74339|c0_g4_i2	8	3.66	7.32	9.25	7.93	9.92	4.28
TR79062|c0_g4_i1	7.51	5.33	5.54	6.73	6.66	11.33	6.72
TR69431|c1_g1_i2	1.67	1.35	2.56	4.12	2.26	9.03	2.39
TR69431|c1_g1_i5	2.64	1.61	1.41	3.03	0.71	5.3	1.41
TR73549|c1_g1_i3	1.3	1.16	2.3	2.99	1.84	8.54	2.74
TR73549|c1_g1_i4	1.44	1.16	3.4	4.41	1.16	7.04	2.85
Mj_1_GCCAAT_L005_R1_001_(paired)_trimmed_(paired)_contig_15410	4.15	2.86	7.63	12.65	12.16	13.64	10.32
TR50936|c0_g1_i1	6.82	5.73	13.49	21.24	17.35	19.56	13.46
TR50936|c0_g1_i2	4.36	3.89	5.31	10.85	8.48	10.5	12.19
Mj_1_GCCAAT_L005_R1_001_(paired)_trimmed_(paired)_contig_27695	4.04	1.75	4.18	2.33	6.78	5.17	4.83
TR66824|c1_g2_i1	4.09	1.68	1.84	0.93	6.4	5.4	3.65
TR75017|c0_g1_i2	5.29	4.07	6.28	5.14	6.74	7.25	4.78
TR68089|c0_g2_i1	20.71	18.3	15.56	10.41	11.74	7.68	12.93
TR71093|c0_g1_i2	8.68	6.52	8.31	10.6	14.12	14.97	8.49
TR71093|c0_g1_i3	4.36	5.81	6.98	6.94	11.65	8.94	5.25
TR76777|c2_g1_i2	7.55	8.09	13.17	14	17.79	16.71	15.16
Mj_1_GCCAAT_L005_R1_001_(paired)_trimmed_(paired)_contig_2727	11.57	9.07	16.83	18.67	24.42	23.36	12.18
Mj_1_GCCAAT_L005_R1_001_(paired)_trimmed_(paired)_contig_7531	7.56	7.81	9.99	9.79	11.76	12.67	8.52
Mj_1_GCCAAT_L005_R1_001_(paired)_trimmed_(paired)_contig_13930	6.84	5.32	10.6	17.39	14.39	21.46	8.24
TR71656|c0_g1_i2	9.81	8.2	14.02	28.89	21.85	31.76	12.84
TR71691|c0_g1_i4	8.78	7.15	16.09	28.06	22.22	33.28	13.12
TR72076|c3_g1_i1	6.23	2.14	6.02	14.46	15.77	17.56	6.3
TR74239|c2_g3_i1	4.56	2.42	6.37	10.46	17.17	15.37	5.66
TR74239|c2_g3_i6	3.06	1.34	4.91	5.71	9.09	5.52	3.28
scaffold10846	0.19	0.56	2.28	5.83	6.94	13.73	1.91
C955646	8.68	12.46	13.37	0.85	1.29	4.41	9.84
Mj_1_GCCAAT_L005_R1_001_(paired)_trimmed_(paired)_contig_90488	0.1	0.1	0.37	6.45	0.16	12.51	0
TR60825|c0_g1_i3	8.02	4.46	7.08	5.22	9.41	9.66	6.14
TR55644|c0_g1_i1	11.65	18.61	17.56	10.7	5.69	6.91	4.25
TR70596|c1_g1_i1	10.89	10.15	9.41	10.89	12.55	14.19	7.35
TR70596|c1_g1_i2	9.86	9.21	9.29	11.22	11.75	13.34	8.45
Mj_1_GCCAAT_L005_R1_001_(paired)_trimmed_(paired)_contig_1089	28.23	23.44	23.47	24.27	20.63	18.52	24.34
TR51040|c0_g1_i1	33.88	29.32	26.47	26.26	23.94	20.97	29.07
Mj_1_GCCAAT_L005_R1_001_(paired)_trimmed_(paired)_contig_25656	3.13	3.25	4.92	6.6	3.88	7.2	3.59
TR78535|c0_g1_i3	5.44	5.61	5.24	8.09	8.72	12.89	7.83
TR78535|c0_g1_i5	5.54	4.83	4.28	8.4	7.36	12.21	6.56
TR78535|c0_g1_i6	3.44	3.08	4.05	4.4	5.68	9.57	4.36
TR78919|c4_g1_i1	4.27	3.56	4.01	6.86	6.12	10.74	5.25
TR78919|c4_g1_i3	2.27	2.32	1.46	3.3	3.55	5.91	3.19
TR78919|c4_g1_i4	1.76	2.06	1.72	3.21	4.01	5.17	3.18
TR78919|c4_g1_i7	5	4.31	4.43	6.27	6.35	10.06	6.26
TR78919|c4_g1_i8	2.66	2.27	2.86	5.04	4.18	7.1	3.24
TR68170|c0_g2_i1	6.22	3.03	4.85	6.19	6.07	9.09	5.53
TR58694|c0_g1_i2	3.27	4.64	4.68	3.78	4.14	6.08	2.85
Mj_1_GCCAAT_L005_R1_001_(paired)_trimmed_(paired)_contig_6762	7	6.01	9.19	10.99	9.42	14.38	8.31
TR57830|c0_g1_i1	2.92	3.23	4.68	3.16	5.78	8.06	3.92
TR58783|c0_g1_i2	5.35	4.86	7.21	6.6	7.22	11.46	8.37
TR58891|c0_g1_i1	8.38	6.07	10.68	13.06	12.88	15.56	9.43
Mj_1_GCCAAT_L005_R1_001_(paired)_trimmed_(paired)_contig_5729	7.39	11.8	12.78	11.59	13.45	26.14	10.18
TR71226|c0_g1_i2	10.69	17.62	17.48	16.64	16.53	36.15	13.8
TR71226|c0_g1_i3	8.01	10.15	8.88	10.51	9.67	21.54	9.26
TR71747|c0_g1_i2	9.97	16.52	21.05	20.84	22.85	44.88	14.59
TR71747|c0_g1_i3	7.17	11.11	11.01	12.53	10.7	27.44	8.04
TR69526|c0_g1_i2	0.46	1.55	8.06	9.28	9.45	26.63	3.13
TR49760|c0_g1_i1	1.78	0	1.39	17.28	0	16.3	2.04
TR67737|c0_g1_i1	1.2	0	1.06	14.85	0.27	16.44	2.02
scaffold13382	1.97	0	1.06	16.73	0.17	20.3	2.44
TR76131|c0_g1_i3	9.75	7.85	9.49	6.97	8.66	5.95	7.6
TR76131|c0_g1_i5	9.27	8.72	10.08	6.72	9.5	7.16	6.53
Mj_1_GCCAAT_L005_R1_001_(paired)_trimmed_(paired)_contig_10446	10.78	13.95	4.34	0.9	0.85	0	11.61
TR51600|c0_g1_i2	9.31	10.84	3.99	0.54	0.51	0	9.85
TR51600|c0_g1_i3	13.36	16.63	6.29	1.41	1.66	0	12.93
TR79847|c3_g3_i1	3.8	6.64	4.48	2.48	1	0.49	3.3
Mj_1_GCCAAT_L005_R1_001_(paired)_trimmed_(paired)_contig_29526	0	0.09	0.42	5.13	7.93	11.88	0.71
TR43308|c1_g1_i1	0	0	1.31	12.09	14.24	18.15	1.72
TR61942|c3_g1_i1	51.76	52.15	73.27	119.32	74.35	127.97	101.83
scaffold11974	19.13	7.34	13.51	22.52	20.5	24.54	9.31
TR76755|c0_g1_i2	8.23	6.46	7.23	3.58	5.04	3.04	6.08
TR79520|c0_g1_i1	2.41	3.89	4.03	4.29	3.28	7.25	2.72
Mj_1_GCCAAT_L005_R1_001_(paired)_trimmed_(paired)_contig_8207	5.74	5.06	5.76	3.27	2.66	2.77	4.83
TR65966|c0_g1_i2	5.88	5.81	6.39	2.49	3.91	2.32	5.96
TR37542|c0_g1_i1	82.27	33.41	98.39	87.82	135.55	105.03	64.93
Mj_1_GCCAAT_L005_R1_001_(paired)_trimmed_(paired)_contig_4482	5.32	3.78	5.3	5.02	6.42	6.69	5.85
TR65097|c1_g4_i2	2.49	1.18	2.44	3.19	3.94	5.32	3.62
TR52447|c0_g1_i4	0.19	0	0	2.08	0.28	7.69	0.74
Mj_1_GCCAAT_L005_R1_001_(paired)_trimmed_(paired)_contig_10486	2.12	1.42	3.29	5.22	5.07	5.22	2.62
TR79668|c1_g1_i1	2.96	2.55	2.54	2.6	4.59	6.32	3.64
TR79668|c1_g1_i2	2.62	2.55	2.28	2.42	3.89	5.77	2.87
TR72646|c0_g1_i1	2.42	2.51	2.47	3.52	3.81	6.61	2.98
TR72646|c0_g1_i3	2.11	2.28	1.97	2.77	3.66	6.17	2.75
TR79694|c0_g2_i1	3.62	3.74	2.73	3.06	4.81	8.22	4.02
TR79694|c0_g2_i8	3.16	3.01	2.05	3.9	3.68	6.26	2.87
TR73796|c0_g1_i1	15.58	16.94	18.47	17.18	23.49	23.03	15.71
TR51745|c0_g1_i1	8.86	12.24	13.6	22.86	20.74	25.04	15.4
TR63578|c0_g1_i3	5.66	5.48	5.62	6.91	5.85	7.7	5.31
TR63578|c0_g1_i5	7.47	9.94	10.9	15.38	10.23	14.53	12.75
Mj_1_GCCAAT_L005_R1_001_(paired)_trimmed_(paired)_contig_9621	0.81	1.54	3.48	6.7	9.54	7.58	2.74
TR74299|c0_g2_i3	3.3	2.51	5.74	9.97	14.83	14.19	4.52
TR74299|c0_g2_i4	1.9	1.21	3.98	5.71	9.02	6.58	4.38
TR74989|c0_g1_i1	3.77	4.49	8.58	15	18.45	16.06	7.54
Mj_1_GCCAAT_L005_R1_001_(paired)_trimmed_(paired)_contig_14535	8.33	2.73	6.73	11.66	1.68	20.74	3.93
Mj_1_GCCAAT_L005_R1_001_(paired)_trimmed_(paired)_contig_4550	26.66	43.45	45.99	279.16	166.81	316.04	257.3
TR60933|c0_g1_i6	71.51	104.58	113.37	741.98	424.54	864.47	717.25
TR73189|c0_g1_i3	20.83	22.26	16	3.32	5.44	4.52	25.69
TR73189|c0_g1_i4	24.67	26.05	19.05	4.49	6.6	4.67	29.27
TR79258|c1_g1_i5	3.55	2.86	4.18	4.74	4.46	7.25	5.53
Mj_1_GCCAAT_L005_R1_001_(paired)_trimmed_(paired)_contig_9333	5.63	4.14	7.56	11.15	11.4	15.5	7.61
TR61011|c0_g2_i2	6.11	6.54	10.71	16.64	20.72	22.46	6.27
TR61011|c0_g3_i6	2.29	1.47	3.9	4.43	7.96	5.06	2
TR77048|c0_g3_i11	1.8	2.04	4.64	5.37	5.57	12.66	2.78
TR77048|c0_g3_i12	2.55	2.36	4.47	6.39	5.81	13.02	2.81
TR77048|c0_g3_i3	4.89	4.89	6.32	9.67	9.47	12.47	5.89
TR77048|c0_g3_i8	2.15	3.74	4.91	7.22	7	9.69	4.61
TR77048|c0_g3_i9	3.5	4.15	7.24	10.06	11.41	12.76	3.97
TR75722|c0_g2_i1	12.18	12.46	13.22	10.55	9.57	10.98	12.33
Mj_1_GCCAAT_L005_R1_001_(paired)_trimmed_(paired)_contig_3998	2.38	1.95	1.9	1.73	2.16	5.25	2
TR77840|c1_g1_i3	2.63	2.39	2.41	1.92	2.68	5.23	2.22
TR79448|c0_g1_i3	2.17	2.28	2.81	1.9	2.12	5.2	0.96
TR56096|c0_g1_i2	13.3	12.97	10.96	5.86	6.44	4.1	7.98
TR51151|c0_g1_i1	89.37	92.12	131.54	179.44	156.18	153.47	132.18
TR69972|c0_g1_i2	60.06	55.22	29.99	19.58	17.09	5	5.05
Mj_1_GCCAAT_L005_R1_001_(paired)_trimmed_(paired)_contig_1572	33.41	32.2	57.26	100.83	112.98	197.93	70.4
TR69906|c0_g1_i1	34.74	44.38	56.22	188.47	186.88	401.05	106.82
TR58604|c0_g1_i1	3.22	3.67	3.09	4.81	4.69	6.74	6.31
TR75291|c0_g1_i2	5.21	2.11	3.85	7.72	8.07	9.06	4.75
Mj_1_GCCAAT_L005_R1_001_(paired)_trimmed_(paired)_contig_7856	50.09	53.97	104.32	144.89	118.97	113.29	83.35
TR57869|c0_g1_i1	54.93	53	110.57	145.64	117.57	123.17	88.97
TR46579|c0_g1_i1	1.38	0.73	0.18	4.85	6.85	3.73	4.07
Mj_1_GCCAAT_L005_R1_001_(paired)_trimmed_(paired)_contig_7458	30.62	47.69	28.28	14.75	27.58	11.99	33.9
TR74236|c1_g1_i8	3.68	1.87	3.47	2.34	5.15	4.78	3.39
TR62884|c0_g1_i1	8.13	6.74	8.45	10.82	11.19	10.69	8.21
TR68288|c0_g1_i2	1.4	1.42	2.89	5.87	4.21	8.99	3.29
TR68288|c0_g1_i3	1.88	1.88	3.06	4.56	6.05	9.08	3.71
TR69416|c1_g1_i1	2.24	3.53	5.2	8.64	10.45	14.4	6.87
TR74205|c0_g1_i2	12.31	9.96	10.05	17.67	18.66	21.33	11.24
TR74205|c1_g1_i1	8.63	6.24	7.8	11.99	15.14	17.41	9.21
TR59426|c0_g1_i1	6.93	4.6	6.86	8.26	6.52	7.51	6.41
TR76362|c0_g1_i3	2.63	3.58	4.98	9.12	11.56	6.91	6.4
TR76362|c1_g1_i1	3.67	2.89	4.26	6	8.34	5.6	5.34
TR56677|c0_g1_i3	5.53	4.08	4.01	1.35	0.95	0.94	1.68
TR70165|c4_g2_i1	12.63	12.17	9.17	0	0.11	0.25	15.02
TR70165|c4_g2_i4	7.24	6.55	5.5	0	0.41	0	8.96
C956656	0.31	1.68	0.37	3.96	5.75	8.3	0.51
Mj_1_GCCAAT_L005_R1_001_(paired)_trimmed_(paired)_contig_4003	51.18	98.16	110.4	20.37	28.86	5.4	87.04
TR57548|c0_g2_i1	52.71	105.08	115.04	19.01	30.06	5.91	95.99
TR74999|c0_g2_i2	16.77	11.87	18.79	20.88	16.6	20.06	14.09
TR74734|c1_g1_i2	7.53	7.28	4.02	1.86	3.5	1.44	4.94
TR75321|c0_g1_i2	6.02	5.87	3.86	1.93	2.82	1.22	3.98
TR75321|c0_g1_i3	6.53	6.4	3.52	1.95	3.61	1.41	3.5
TR75321|c0_g1_i4	6.33	6.09	4.57	1.66	3.19	1.16	4.04
TR72173|c0_g3_i1	7.39	7.13	11.83	15.16	9.97	13.83	13.91
TR72173|c0_g3_i2	3.99	3.4	5.77	7.52	6.27	8.24	6.04
TR72711|c0_g2_i1	3.24	4.31	5.98	9.07	6.07	7.58	5.57
TR72711|c0_g2_i4	3.66	3.7	5.7	8.56	4.79	7.48	5.12
TR72711|c0_g2_i5	4.85	6.33	9.29	11.78	7.56	10.68	9.15
Mj_1_GCCAAT_L005_R1_001_(paired)_trimmed_(paired)_contig_27130	1.84	2.37	4.71	11.88	8.76	16.14	4.06
TR67135|c0_g1_i1	4.07	2.45	2.21	3.42	3.75	7.33	2.21
TR45395|c0_g1_i1	2.02	3.16	2.81	11.36	11.8	14.05	3.98
TR66240|c0_g1_i4	2.24	4.01	3.19	6.99	6.03	8.75	6.65
TR67212|c0_g1_i2	6.35	6.47	8.76	15.51	14.03	21.39	13.69
Mj_1_GCCAAT_L005_R1_001_(paired)_trimmed_(paired)_contig_8914	4.29	6.16	4.48	8.87	7.09	12.01	7.71
TR64350|c1_g1_i1	3.71	3.09	1.64	7.82	8.48	10.95	5.68
TR69615|c1_g1_i2	5.37	5.16	4.31	7.24	9.39	11.69	6.49
Mj_1_GCCAAT_L005_R1_001_(paired)_trimmed_(paired)_contig_9031	0.55	0.75	1.16	6.64	6.73	8.64	1.05
TR69469|c1_g1_i2	1.13	1.04	1.95	9.8	12.06	12.12	2.24
TR69469|c1_g1_i4	0.82	0.74	2.54	9.36	10.97	12.39	1.79
TR76033|c2_g1_i4	0.41	0.06	1.35	4.41	4.36	5.72	0.8
TR76033|c2_g1_i6	0.34	0.49	0.71	4.24	4.51	6.23	0.85
C962326	0	0	0	2.28	3.16	8.83	0.83
TR60544|c1_g1_i1	0	0.08	0	2.43	2.53	6.36	0.4
TR76734|c0_g2_i1	5.43	5.65	6.68	6.56	4.94	9.5	4.43
Mj_1_GCCAAT_L005_R1_001_(paired)_trimmed_(paired)_contig_1487	28.33	25.52	37.19	46.1	35.47	49.73	42.62
TR64472|c0_g3_i1	11.23	10.57	8.47	17.25	24.89	40.66	9.86
TR64472|c0_g5_i2	6.25	5.03	3.54	8.4	7.56	15.93	4.73
TR64472|c0_g5_i3	5.9	5.9	3.43	9.04	8.08	19.99	5.61
TR65063|c0_g3_i1	6.66	7.55	3.82	10.6	10.94	28.89	4.71
TR75593|c1_g1_i1	5.91	3.53	3.9	5.03	6.03	3.34	5.62
TR66968|c0_g1_i1	2.14	2.09	2.28	35.52	63.33	32	33.53
TR66968|c0_g1_i4	2.42	1.75	2.62	45.92	75.78	34.64	31.98
TR66968|c0_g1_i5	1.98	1.14	1.17	21.06	34.04	14.72	16.22
TR66968|c0_g1_i6	1.35	0.51	1.58	18.56	30.95	13.99	13.38
scaffold10042	0.14	0.9	1.11	6.36	1.02	13.66	0.67
TR62894|c0_g1_i1	3.82	4.71	5.49	0.68	0.64	0.95	4.54
TR73876|c0_g1_i5	7.26	6.54	12.97	15.15	10.05	18.21	10.74
TR60521|c0_g1_i1	23.05	26.92	16.13	25.03	17.19	0.85	36.58
TR69319|c1_g3_i1	4.36	4.09	5	4.25	4.99	6.69	4.25
TR69319|c1_g3_i3	6.41	4.27	4.8	6.15	6.66	10.53	5.93
TR69319|c1_g3_i4	9.32	4.76	7.01	7.95	10.96	12.84	8.83
TR53382|c0_g1_i1	8.69	9.31	4.81	0.4	0.38	0.56	4.52
TR61152|c0_g1_i1	19.19	22.31	11.89	2.24	1.14	3.56	11.75
TR78939|c1_g1_i2	4.35	5.2	2.75	0.25	0	0.35	1.99
C972108	8.47	9.55	12.1	13.5	9.79	15.38	9.52
Mj_1_GCCAAT_L005_R1_001_(paired)_trimmed_(paired)_contig_8158	7.81	6.95	9.71	9.75	6.85	10.94	9.01
TR69880|c0_g1_i5	5.36	5.3	5.88	6.45	3.86	6.55	4.55
TR63564|c0_g1_i2	1.2	0.57	1.41	4.49	6.21	7.42	3.2
TR64869|c0_g1_i3	1.26	0.88	1.17	4.65	6.87	7.55	3.34
TR64869|c0_g1_i4	0.96	0.58	1.54	7.08	7.6	6.81	3.19
TR64869|c0_g1_i5	1.37	0.36	1.32	5.73	7.08	5.53	2.7
Mj_1_GCCAAT_L005_R1_001_(paired)_trimmed_(paired)_contig_7495	8.17	6.12	12.42	17.15	7.07	39.96	9.32
TR68822|c0_g2_i1	8.04	5.43	11.99	14.65	5.86	35.57	10.25
TR71237|c0_g1_i1	17.65	14.54	20.56	28.2	23.35	40.18	23.12
TR74836|c1_g1_i1	5.18	7.94	10.62	24.71	16.2	110	9.08
Mj_1_GCCAAT_L005_R1_001_(paired)_trimmed_(paired)_contig_37594	1.91	1.69	5.03	17.06	1.1	18.31	2.47
TR61142|c0_g1_i1	1.63	1.1	3.73	19.38	0.72	15.81	1.89
TR61142|c0_g1_i2	3.12	2.26	6.31	29.74	1.63	26.5	4.09
Mj_1_GCCAAT_L005_R1_001_(paired)_trimmed_(paired)_contig_3513	6.81	4.86	3.31	7.9	2.45	13.95	3.36
TR59737|c1_g1_i1	13.14	11.92	6.82	16.99	6.36	32.65	14.11
TR76683|c0_g2_i2	27.48	17.95	15.81	32.08	16.23	74.25	21
Mj_1_GCCAAT_L005_R1_001_(paired)_trimmed_(paired)_contig_13057	27.83	20.15	48.05	73.02	81.11	67.72	63.36
TR66958|c0_g2_i1	54.58	43.46	79.74	135.83	130.49	118.42	109.11
TR68139|c0_g1_i3	42.01	33	62.28	92.53	92.18	81.78	76.18
TR68139|c0_g1_i5	30.84	26.82	48.28	74.03	69.23	64.62	59.51
scaffold12180	26.54	23.9	48.47	74.4	78.66	66.67	62.5
TR72731|c0_g15_i4	12.84	10.81	20.97	23.49	18.37	22.55	12.69
scaffold13128	9.28	8.49	14.58	19.28	14.2	17.81	11.62
C974462	4.56	4.48	6.13	10.27	8.21	11.88	7.44
TR73830|c0_g1_i1	4.02	3.85	5.92	7.11	6.31	10.8	6.67
TR73830|c0_g1_i2	3.72	3.82	6.4	9.24	6.27	9.87	6.46
TR74597|c0_g1_i3	1.9	2.12	3.07	4.59	2.78	5.64	3.6
TR74597|c0_g1_i4	2.34	2.7	4.77	6.93	5.31	8.09	6.04
TR49097|c0_g3_i1	27.25	23.96	51.85	70.03	106.5	65.47	69.5
TR59436|c1_g3_i3	2.05	4.68	0.93	3.51	2.13	7.19	2.49
TR59436|c1_g3_i4	5.3	12.15	1.73	11.61	5.68	18.15	5.2
TR62213|c1_g1_i2	2.15	1.5	1.15	3.1	3.21	5.42	3.08
TR62213|c1_g1_i3	2.46	2.42	2.39	4.2	4.68	6.37	3.76
Mj_1_GCCAAT_L005_R1_001_(paired)_trimmed_(paired)_contig_5690	0.76	0.36	5.28	8.11	5.94	10.77	4.13
TR74423|c2_g1_i3	0.68	0.87	6.54	10.25	7.2	12.15	4.68
TR76610|c0_g1_i2	0.58	1.28	8.12	8.31	9.29	12.66	4.77
TR76610|c0_g1_i4	0.57	0.31	5.7	7.2	7.88	8.28	4.15
Mj_1_GCCAAT_L005_R1_001_(paired)_trimmed_(paired)_contig_13299	0.83	2.09	1.75	10.79	13.48	12.4	1.17
TR71526|c0_g1_i1	8.76	8.37	1.26	1.98	1.6	0.2	5.81
Mj_1_GCCAAT_L005_R1_001_(paired)_trimmed_(paired)_contig_12628	4.09	5.62	6.2	9.69	13.02	13.21	8.62
TR56601|c1_g1_i2	81.42	160.86	173.53	211.86	290.13	257.92	161.09
TR61079|c0_g3_i2	8.93	4.63	15.52	50.95	92.04	55.87	41.71
TR62435|c0_g1_i1	9.9	2.94	4.59	7.36	8.8	4.3	9.65
TR71145|c0_g1_i3	5.22	3.94	13	36.08	15.54	23.15	16.32
TR55034|c0_g1_i1	8.64	12.3	11.6	26.81	26.3	33.55	19.03
TR55034|c0_g1_i3	7.91	10.82	9.88	22.32	21.85	29.66	15.64
Mj_1_GCCAAT_L005_R1_001_(paired)_trimmed_(paired)_contig_24563	3.97	2.9	4.2	5.87	6.4	7.84	5.29
TR66870|c0_g1_i1	5.23	4.42	6.53	8.84	7.7	11.08	6.79
TR67938|c0_g1_i1	5.82	4.37	5.41	10.28	9.3	10.74	8.1
Mj_1_GCCAAT_L005_R1_001_(paired)_trimmed_(paired)_contig_7871	10.63	12.87	9.01	12.42	11.25	16.23	10.95
TR72048|c1_g1_i3	8.04	7.08	7.19	6.81	6.61	11.31	6.13
Mj_1_GCCAAT_L005_R1_001_(paired)_trimmed_(paired)_contig_3904	11.66	12.44	9.98	6.63	5.71	5.1	10.12
TR76291|c0_g1_i1	15.33	14.53	14.46	10.06	7.37	7.8	14.54
Mj_1_GCCAAT_L005_R1_001_(paired)_trimmed_(paired)_contig_35372	4.78	8.84	5.29	41.69	23.38	51.97	4.63
TR61469|c1_g1_i2	7.9	14.66	10.63	75.21	40.4	87.63	7.28
Mj_1_GCCAAT_L005_R1_001_(paired)_trimmed_(paired)_contig_6421	3.5	1.81	14.45	23.48	9.4	54.4	6.62
TR75035|c0_g1_i1	4.17	2.72	16.23	26.39	11.27	62.54	8.04
TR51325|c0_g1_i1	0	0	1.46	6.64	1.39	6.02	1.22
Mj_1_GCCAAT_L005_R1_001_(paired)_trimmed_(paired)_contig_26339	4.07	5.48	11.09	14.28	11.92	13.45	4.43
TR69171|c0_g1_i2	3.16	3.5	4.48	4.11	4.65	5.47	3.7
TR56605|c1_g1_i1	6.14	3.9	10.1	7.75	13.3	16.28	9.05
Mj_1_GCCAAT_L005_R1_001_(paired)_trimmed_(paired)_contig_4697	5.09	2.75	5.01	9.16	7.65	20.43	5.77
TR75303|c1_g1_i6	5.33	3	6.36	11.68	6.93	25.77	7.1
scaffold1261	4.62	2.29	4.67	9.98	5.36	19.15	5.87
TR72981|c0_g1_i1	42.56	45.04	38.66	35.65	26	28.32	45.84
TR71622|c0_g1_i1	3.15	3.47	5.89	5.12	5.94	5.86	3.66
TR76751|c2_g3_i2	2.54	2.46	3.37	3.48	4.24	5.53	2.38
TR55523|c0_g1_i1	277.81	160.42	264.17	321.47	195.55	297.45	177.73
TR66226|c0_g2_i4	4.54	5.48	5.55	3.61	4.51	2.6	3.27
TR79503|c4_g2_i4	5.09	5.75	5.31	5.21	4.59	3.89	4.96
TR79826|c3_g3_i3	4.19	3.99	2.81	3.8	3.8	7.33	3.43
Mj_1_GCCAAT_L005_R1_001_(paired)_trimmed_(paired)_contig_4571	14.44	11.6	12.86	16.8	17.55	16.05	15.78
Mj_1_GCCAAT_L005_R1_001_(paired)_trimmed_(paired)_contig_6748	2.69	3.43	2.57	10.6	14.6	13.41	7.85
Mj_1_GCCAAT_L005_R1_001_(paired)_trimmed_(paired)_contig_9628	1.99	1.9	2.77	7.2	11.82	8.98	5.9
TR73214|c0_g2_i1	4.72	4.88	6.79	21.51	30.56	26.33	14.45
TR73214|c0_g2_i2	3.96	3.54	3.6	14.15	15.87	16.4	9.61
TR65547|c0_g1_i1	12.01	12.09	17.3	22	25.37	28.39	15.24
TR70095|c0_g2_i1	5.8	5.31	4.23	9.56	9.91	11.82	8.23
TR70095|c0_g2_i3	3.19	2.98	3.2	5.33	6.21	5.78	4.91
TR79548|c0_g1_i3	2.43	3.54	2.53	4.9	3.44	7.26	3.32
Mj_1_GCCAAT_L005_R1_001_(paired)_trimmed_(paired)_contig_38413	0.89	0.89	3.37	2.47	6.13	5.55	4.64
TR77989|c0_g2_i3	4.24	1.84	3.41	5.29	6.31	8.88	1.87
TR79808|c0_g1_i1	5.19	5.05	5.09	10.43	10.01	35.03	4.89
TR74626|c0_g1_i1	9.52	10.48	12.09	13.87	13.16	22.43	14.67
Mj_1_GCCAAT_L005_R1_001_(paired)_trimmed_(paired)_contig_17658	5.35	6.11	4.2	0.4	0	0	1.75
TR79669|c2_g3_i2	11.29	9.03	5.29	4.05	6.18	3.91	10.18
Mj_1_GCCAAT_L005_R1_001_(paired)_trimmed_(paired)_contig_191	19.67	15.4	8.59	6.17	9.93	6.93	17.58
TR61705|c1_g1_i1	1.41	4.04	4.14	5.56	7.68	8.29	7.61
TR61705|c1_g1_i6	4.6	4.11	2.27	7.54	4.88	8.24	7.46
TR71659|c1_g1_i3	3	3.34	4.32	7.04	8.89	7.07	9.56
TR46507|c0_g1_i1	83.94	57.36	139.46	119.48	217.82	193.12	156.54
Mj_1_GCCAAT_L005_R1_001_(paired)_trimmed_(paired)_contig_13305	2.67	2.07	5.1	6.35	2.24	13.5	1.48
TR57949|c4_g3_i7	2.87	3.36	3.86	4.58	5.24	4.18	4.31
TR78757|c0_g4_i2	5.95	4.48	5.92	5.83	5.16	8.32	6.24
TR63276|c2_g1_i1	0	0	4	9.09	16.7	16.7	1.42
scaffold13278	0	0	3.54	6.59	15.73	15.04	1.21
Mj_1_GCCAAT_L005_R1_001_(paired)_trimmed_(paired)_contig_95727	0	0	0	1.07	0	24.59	0
TR77326|c0_g1_i1	15.22	14.06	4.28	2	3.2	0.28	8.79
Mj_1_GCCAAT_L005_R1_001_(paired)_trimmed_(paired)_contig_1777	12.83	8.36	9.11	0	0	0	0.56
TR77417|c0_g1_i6	17.66	20.16	17.57	0.25	0.47	0	12.12
TR62184|c0_g1_i2	17.17	19.05	18.61	29.6	25.97	41.33	21.1
TR67490|c0_g2_i1	24.02	26.25	23.23	40.18	34.69	56.08	27.03
Mj_1_GCCAAT_L005_R1_001_(paired)_trimmed_(paired)_contig_18032	16.14	16.64	28.41	38.34	25.25	55.65	24.92
TR72298|c3_g1_i1	22.75	24.7	45.17	58.34	45.61	92.53	36.9
scaffold12864	16.27	18.87	34.19	45.12	33.73	67.53	28.03
Mj_1_GCCAAT_L005_R1_001_(paired)_trimmed_(paired)_contig_6249	17.51	14.53	14.79	25.24	18.83	40.92	19.05
Mj_1_GCCAAT_L005_R1_001_(paired)_trimmed_(paired)_contig_35263	0.51	0	0.6	1.6	0	8.37	0.5
TR67963|c0_g3_i1	4.84	4.41	6.51	5.04	2.02	3.03	5.4
TR59304|c0_g1_i2	3.45	2.97	7.19	8.18	10.55	9.07	7.78
TR59304|c0_g1_i4	1.59	1.7	3.31	4.92	5.62	5.43	4.07
TR71319|c0_g1_i1	11.89	10.26	17.95	20.14	17.98	17.84	12.62
TR48756|c0_g1_i1	40.86	26.99	39.73	53.65	68.12	79.03	42.43
Mj_1_GCCAAT_L005_R1_001_(paired)_trimmed_(paired)_contig_3259	16.47	12.4	17.19	9.75	11.69	3.36	9.91
TR71661|c0_g1_i1	23.24	16.8	22.48	10.32	9.89	3.97	7.24
TR74038|c1_g1_i3	8.35	6.34	8.29	7.43	7.4	3.75	8.55
TR71253|c0_g1_i5	2.4	1.82	3.43	3.69	3.36	5.13	2.37
TR69725|c0_g1_i2	1.37	3.18	0.21	5.43	1.35	19.86	5.73
TR69725|c0_g1_i3	2.08	4.43	0.16	8.41	1.98	30.75	8.44
TR69725|c0_g1_i5	1.27	4.7	0.08	5.51	2.44	22.76	8.23
TR77982|c1_g1_i10	0.26	0.25	0.19	1.93	1.03	5.24	0.31
TR77982|c1_g1_i12	0.21	0.55	0.06	1.91	1.02	6.29	0.41
TR77982|c1_g1_i15	0.2	0.14	0.06	1.58	0.9	5.15	0.78
TR77982|c1_g1_i2	0.15	0.22	1.17	5.24	1.03	9.48	0.45
TR77982|c1_g1_i4	0.33	0.11	0.13	2.4	0.75	5.78	0.72
TR78847|c1_g2_i11	0.87	0.88	0.36	2.37	1.21	5.46	0.92
TR78847|c1_g2_i13	0.68	0.65	0.37	2.57	1.68	7.77	0.8
TR78847|c1_g2_i3	0	0.21	0	2.1	0.33	8.56	0
TR78847|c1_g2_i6	0.2	0.58	0.4	2.68	1.31	7.8	0.86
TR78847|c1_g2_i8	0.45	0.55	1.05	3.36	0.87	8.85	0.44
Mj_1_GCCAAT_L005_R1_001_(paired)_trimmed_(paired)_contig_28088	0.26	0.43	2.72	8.17	3.28	18.74	0.76
TR69960|c1_g3_i1	1.28	1.77	4.24	12.2	5.4	22.12	0.92
TR77982|c1_g1_i13	0.21	0.2	0.83	4.59	1.69	8.54	0.56
TR77982|c1_g1_i14	0.42	0.8	0.42	2.1	1.08	5.55	0.47
TR77982|c1_g1_i7	0.17	0.37	0.07	2.31	0.59	6.23	0.33
TR78847|c1_g1_i4	0.11	0.33	0.81	3.11	0.86	5.75	0.23
TR75587|c2_g1_i7	2.18	1.98	0.24	7.58	6.21	5.19	2.15
TR75930|c0_g3_i1	5.92	5.54	4.22	8.91	9.14	7.63	6.43
Mj_1_GCCAAT_L005_R1_001_(paired)_trimmed_(paired)_contig_14657	0.44	0.3	1.1	18.72	10.5	30.54	1.06
TR71402|c0_g1_i1	0.57	0.35	1.73	23.98	17.87	37.94	1.18
TR71402|c0_g1_i2	1.1	0.95	1.99	32.24	19.03	44.77	2.71
TR72458|c1_g1_i4	0.72	0.34	1.87	29.2	18.54	43.47	1.76
TR74912|c1_g1_i1	10.76	6.61	3.36	2.7	3.39	5.92	8.66
TR47941|c0_g1_i1	10.66	13.24	6.46	58.98	54.43	92.48	27.18
Mj_1_GCCAAT_L005_R1_001_(paired)_trimmed_(paired)_contig_9692	16.21	15.63	29.52	30.95	32.32	31.64	22.03
TR70810|c0_g1_i2	37.54	66.83	48.05	8.6	20.23	5.19	48.45
TR70810|c0_g1_i3	5.58	10.84	6.36	1.71	1.34	0.6	6.56
Mj_1_GCCAAT_L005_R1_001_(paired)_trimmed_(paired)_contig_9404	1.67	5.84	1.97	36.29	16.19	40.02	8.13
TR62895|c0_g1_i1	4.1	11.33	3.37	63.13	28.25	64.97	11.19
Mj_1_GCCAAT_L005_R1_001_(paired)_trimmed_(paired)_contig_1527	1.72	2.46	2.74	3.06	2.8	8.74	3.16
TR75271|c0_g1_i1	2.61	3.89	2.63	4.45	5.38	5.74	3.72
Mj_1_GCCAAT_L005_R1_001_(paired)_trimmed_(paired)_contig_30648	0.11	0.99	1.08	41.1	52.51	118.25	3.52
TR50050|c1_g1_i1	0.97	2.31	2.09	99.89	119.67	297.35	11.3
TR69987|c2_g2_i3	7.52	6.1	5.86	2.1	4.27	3.96	5.52
TR72301|c0_g4_i2	5.03	6.78	2.7	7.79	12.44	11.74	10.15
TR78421|c0_g1_i3	5.59	5.86	2.34	8.16	15.71	10.61	9.86
TR78421|c0_g1_i6	3.87	5.06	2.49	7.57	13.36	8.07	8.88
TR76028|c2_g1_i2	6.78	7.09	8.55	16.39	11.82	23.29	9.55
TR58855|c0_g1_i1	26.27	24.09	31.96	43.45	30.9	34.1	19.33
Mj_1_GCCAAT_L005_R1_001_(paired)_trimmed_(paired)_contig_3517	11.55	10.69	15.5	17.58	13.66	16.83	12.45
scaffold12498	9.81	8.96	11.81	17.6	14.58	17.77	8.81
Mj_1_GCCAAT_L005_R1_001_(paired)_trimmed_(paired)_contig_103	6.29	5.11	8.25	10.84	10.37	20.91	5.2
TR69500|c0_g1_i2	3.32	4.16	5.65	8.89	5.11	13.52	3.02
Mj_1_GCCAAT_L005_R1_001_(paired)_trimmed_(paired)_contig_7104	5.35	4.77	5.45	5.71	4.06	4.49	5.78
TR51280|c0_g2_i1	22.05	19.44	32.44	42.09	39.8	44.61	35.2
TR51280|c0_g2_i2	19.41	12.94	20	27.66	27.89	35.11	24.4
scaffold1176	7.42	6.12	2.74	1.76	0.66	0.25	3.39
Mj_1_GCCAAT_L005_R1_001_(paired)_trimmed_(paired)_contig_8313	5.81	5.7	4.1	8.89	7.14	16.53	6.36
TR42894|c0_g1_i1	9.13	6.86	11.33	12.94	13.4	33.11	9.16
TR67861|c2_g1_i1	2.21	2.44	3.2	4.58	3.3	11.12	5.19
TR70545|c2_g2_i1	7.26	5.67	7.45	14.22	10.61	21.97	7.72
TR79095|c4_g6_i13	3.05	2.66	2.45	3.52	1.95	6.52	2.5
TR79095|c4_g6_i7	4.08	3.17	2.21	6.07	3.55	10.79	3.18
TR79095|c4_g6_i8	3.46	2.41	1.33	4.13	2.1	7.79	3.75
TR69430|c0_g1_i1	1.72	0.88	2.49	2.31	5.53	5.57	2.34
TR69430|c0_g1_i2	1.75	1.72	2.65	4.49	6.27	8.18	3.01
TR69430|c0_g1_i3	1.83	2.52	3.85	5.83	8.18	10.86	4.38
TR69430|c0_g1_i5	1.54	1.35	1.67	3.81	6.57	6.51	2.16
Mj_1_GCCAAT_L005_R1_001_(paired)_trimmed_(paired)_contig_8413	11.58	9.78	10.08	3.14	2.18	3.42	9
Mj_1_GCCAAT_L005_R1_001_(paired)_trimmed_(paired)_contig_3629	10.32	7.68	7.28	3.1	2.46	5.13	7.38
TR52061|c0_g1_i2	6.18	7.65	5.82	0.65	1.08	0.34	5.69
TR58626|c0_g1_i1	4.43	4.48	5.53	1.04	0.78	0.14	3.73
TR58626|c0_g1_i4	7.47	6.46	7.47	1.34	0.63	0.31	5.15
TR77955|c0_g1_i1	15.7	11.87	11.29	14.2	14.64	18.65	10.76
TR76242|c0_g1_i4	2.4	1.77	4.11	7.9	7.92	14.01	2.68
TR76365|c0_g1_i1	2.42	2.3	4.67	12.1	11.59	21.25	3.3
TR76365|c0_g1_i2	2.64	2.94	3.28	10.25	12.07	19.88	3.47
TR68758|c0_g1_i2	10.53	11.08	4.6	2.41	3.83	0.71	6.62
Mj_1_GCCAAT_L005_R1_001_(paired)_trimmed_(paired)_contig_19843	9.18	6.96	8.77	4.95	10.35	5.96	7.68
TR61185|c0_g1_i3	0.93	1.78	2.01	33.26	1.62	41.52	1.22
Mj_1_GCCAAT_L005_R1_001_(paired)_trimmed_(paired)_contig_19309	3.78	7.32	7.32	9.39	11.26	15.23	10.2
TR55917|c0_g1_i1	10.03	21.57	22.51	27.8	30.31	49.48	27.5
TR55917|c0_g1_i4	6.18	13.49	13.52	16.48	19.28	34.1	20.25
Mj_1_GCCAAT_L005_R1_001_(paired)_trimmed_(paired)_contig_5516	15.25	10.27	20.38	29.7	21.41	33.33	23.08
TR62186|c0_g1_i1	23.69	17.95	36.72	48.72	42.28	57.27	32.63
TR50284|c0_g1_i1	1.41	1.01	2.35	0.75	2.47	5.88	1.62
TR68719|c0_g1_i5	4.48	4.14	3.92	6.17	7.25	6.21	4.9
TR68719|c0_g1_i6	3.94	3.88	4.97	6.28	8.31	6.94	4.31
TR71979|c0_g1_i2	8.99	7.79	10.32	12.12	10.45	12.93	9.52
TR79297|c1_g1_i1	4.47	4.04	2.21	5.79	4.93	10.07	3.36
TR79314|c0_g2_i7	3.21	2.71	2.32	3.38	3.06	6.13	3.62
TR73427|c1_g1_i6	4.05	4.09	5.31	7.92	9.67	9.75	4.05
TR73427|c1_g1_i7	3.72	4.33	4.69	7.55	8.39	8.35	4.33
TR73427|c1_g1_i8	2.72	3.64	3.46	5.37	6.49	6.8	2.96
TR73804|c0_g1_i1	4.19	4.46	4.66	7.98	10.13	10.83	4.11
TR73804|c0_g1_i2	4.58	5.59	4.88	9.38	10.28	11.2	6.01
Mj_1_GCCAAT_L005_R1_001_(paired)_trimmed_(paired)_contig_3434	21.28	18.52	25.19	35.12	32.23	50.45	44.88
TR71861|c0_g5_i1	23.49	18.61	26.04	32.83	34.32	54.93	41.16
TR71861|c0_g5_i2	19.73	20.7	29.27	38.88	38.33	58.44	42.58
Mj_1_GCCAAT_L005_R1_001_(paired)_trimmed_(paired)_contig_73350	0.04	0.12	0.05	2.05	0.25	6.07	0.41
Mj_1_GCCAAT_L005_R1_001_(paired)_trimmed_(paired)_contig_76263	0	0.34	0	2.79	1.57	8.19	0.52
TR37852|c0_g1_i1	0	0	0.62	1.67	0.39	6.42	0.78
C975144	0.23	0.2	3.2	7.89	0.64	13.07	1.62
TR48595|c0_g1_i1	0	0.72	5.88	11.05	2.23	20.94	2.45
TR76724|c0_g1_i5	0.11	0.29	2.36	6.62	0.37	10.88	1.14
TR66254|c0_g1_i2	6.7	4.74	5.93	4.44	5.17	3.18	7.5
TR69691|c0_g2_i2	8.63	10.1	7.67	3.63	2.89	2.54	5.21
TR67038|c5_g3_i1	2.69	1.47	1.99	3.85	2.96	7.08	4.43
scaffold10464	3.18	3.2	2.86	5.22	7.05	10.2	5.26
Mj_1_GCCAAT_L005_R1_001_(paired)_trimmed_(paired)_contig_47474	0.26	1.26	0.93	4.16	1.17	8.71	0.78
Mj_1_GCCAAT_L005_R1_001_(paired)_trimmed_(paired)_contig_9905	11.66	20.95	8.08	21.81	21.83	52.22	21.4
TR73178|c0_g1_i1	10.16	21.31	8.73	22.5	24.25	54.83	20.84
Mj_1_GCCAAT_L005_R1_001_(paired)_trimmed_(paired)_contig_17546	5.31	6.04	9.3	19.09	10.14	45.06	9.5
TR74609|c1_g1_i1	9.87	11.24	10.38	20.45	12.32	46.38	10.84
Mj_1_GCCAAT_L005_R1_001_(paired)_trimmed_(paired)_contig_17802	2.73	2.43	3.49	11.05	5.17	9.86	4.75
TR67225|c0_g1_i1	5.98	3.62	6.45	17.56	9.88	16.6	10.06
TR67225|c0_g1_i2	4.21	3.66	4.67	13.58	7.79	15.98	7.21
TR67225|c1_g2_i1	4.86	4.24	7.36	17.51	11.44	18.34	10.86
Mj_1_GCCAAT_L005_R1_001_(paired)_trimmed_(paired)_contig_7011	6.99	4.44	2.95	1.37	0.39	0.48	4.77
TR71314|c1_g1_i1	53.25	34.29	47.21	97.51	92.32	110.82	55.02
TR71314|c1_g1_i2	6.91	3.58	5.28	11.37	10.17	15.1	5.74
Mj_1_GCCAAT_L005_R1_001_(paired)_trimmed_(paired)_contig_18632	9.3	7.97	5.02	1.84	3.76	1.07	5.34
TR56511|c1_g1_i1	7.82	5.87	8.76	10.33	10.32	14.68	13.64
TR61304|c0_g1_i1	7.19	5.64	8.26	7.94	10.91	11.4	5.68
TR67948|c1_g1_i1	8.52	6.34	7.57	8.76	8.84	11.73	6.05
TR67948|c1_g1_i2	9.21	6.84	8.42	8.95	11.15	13.54	7.29
TR67948|c1_g1_i5	7.65	5.01	7.01	6.74	7.57	9.89	5.89
TR55431|c0_g2_i1	2.82	3.91	4.67	4.27	0	9.53	1.89
TR59902|c0_g2_i1	5.98	3.64	4.21	5.77	5.63	6.58	4.58
TR59902|c0_g2_i2	3.57	2.26	3.86	4.17	3.64	5.81	2.82
TR70491|c2_g1_i2	2.06	1.49	3.84	5.2	3.83	6.17	2.87
Mj_1_GCCAAT_L005_R1_001_(paired)_trimmed_(paired)_contig_11887	4.85	4.95	7.03	12.21	9.61	10.82	8.75
TR66457|c0_g1_i1	4.83	4.53	7.19	9.61	8.21	9.34	6.87
TR69393|c0_g1_i1	5.16	3.19	6.95	10.47	7.96	10.92	6.43
TR75920|c0_g2_i1	11.74	19.95	18.75	18.44	15.73	29.97	6.74
scaffold13581	9.32	14.2	15.97	13.87	11.37	25.79	5.98
TR75497|c0_g1_i1	0.89	1.73	1.67	5.46	6.56	5.58	5.52
TR63945|c0_g1_i1	6.2	4.39	5.71	9.62	11.93	13.55	7.15
TR64366|c0_g1_i1	8.11	4.82	6.88	9.93	19.19	17.12	8.78
TR64366|c0_g1_i2	4.91	4.67	5.11	6	9.76	9.98	5.12
Mj_1_GCCAAT_L005_R1_001_(paired)_trimmed_(paired)_contig_17538	10.02	8.16	14.92	13.77	16.2	20.81	17.18
TR70881|c0_g1_i1	11.75	10.57	16.48	16.65	17.88	20.72	17.57
TR70881|c0_g1_i2	4.39	1.92	2.15	5.21	4.36	5.27	2.88
TR66789|c1_g1_i4	10	10	8.65	8.23	7.22	7.5	9.87
TR66789|c2_g1_i5	4.69	3.97	3.94	3.51	5.31	5.6	4.92
TR69130|c0_g1_i3	4.39	2.3	2.7	4.62	4.06	6.39	3.78
Mj_1_GCCAAT_L005_R1_001_(paired)_trimmed_(paired)_contig_5460	5.64	6.19	6.4	6.95	5.48	13.63	7.76
TR79582|c0_g3_i2	5.56	5.48	6.66	8.54	4.83	13.47	7.61
scaffold1052	5.2	5.86	5.8	6.25	4.12	11.26	6.18
Mj_1_GCCAAT_L005_R1_001_(paired)_trimmed_(paired)_contig_18735	7.49	4.6	6.15	8.15	5.32	8.78	7.2
TR68499|c0_g1_i3	2	0.77	1.57	3.18	5	3.71	3.43
TR68825|c2_g1_i1	2.92	3.12	2.37	4.5	5.76	4.11	4.14
TR73803|c0_g1_i1	5.25	4.62	6.07	6.02	6.64	9.48	9.66
TR73803|c0_g1_i2	5.32	4.86	7.1	6.41	7.51	10.79	9.23
TR73803|c0_g1_i3	5.37	4.81	6.01	5.98	6.89	9.65	8.39
TR73803|c0_g1_i5	4.92	4.55	5.46	6.25	8.19	10.46	8.03
TR73817|c0_g1_i2	3.62	3.92	4.45	5.49	4.8	8.62	6.98
Mj_1_GCCAAT_L005_R1_001_(paired)_trimmed_(paired)_contig_11419	5.8	5.23	7.83	7.38	9.18	10.92	9.38
Mj_1_GCCAAT_L005_R1_001_(paired)_trimmed_(paired)_contig_19472	1.11	0.71	1.6	24.77	2.04	53.37	10.01
TR66596|c2_g1_i3	1.14	0.98	3.4	26.38	2.63	59.27	10.68
TR66596|c2_g1_i4	1.18	0.83	3.48	27.83	2.35	59.69	10.9
TR77434|c0_g1_i4	4.34	6.16	3.12	0	0	0	3.03
TR61609|c0_g1_i1	15.94	18.93	32.2	99.39	106.22	102.28	26.8
TR60963|c0_g1_i1	9.09	10.83	13.22	14.36	12.25	13.17	9.33
TR60918|c0_g4_i1	0.62	0	0.24	3.28	0.31	7.56	1.02
TR60918|c0_g4_i2	0	0.18	1.3	1.74	0.55	7.72	0.36
TR79451|c1_g1_i2	1.54	1.01	2.49	5.45	7.01	5.71	2.18
TR79451|c1_g1_i4	2.29	1.65	2.51	6.26	8.33	5.01	2.54
TR79451|c1_g1_i6	2.27	1	2.2	5.3	7.14	5.03	2.84
TR76849|c1_g2_i1	4.22	5.02	4.7	3.84	4.19	2.86	4.62
TR51934|c0_g1_i1	4.4	5.17	4.22	4.24	2.15	1.37	5.26
TR77328|c1_g1_i2	5.69	4.94	2.78	9.62	6.58	13.23	3.68
TR77328|c1_g1_i3	3.29	3.17	2.39	6.83	4.62	10.44	2.65
TR77328|c1_g1_i4	5.87	5.42	3.34	9.27	5.36	12.87	4.4
TR73599|c6_g1_i1	21.07	18.4	25.85	30.26	35.96	44.35	33.16
TR79679|c1_g1_i2	5.4	4.4	5.08	3.68	2.31	1.12	5.71
TR57206|c1_g1_i1	18.09	21.19	35.08	40.12	32.66	44.75	26.19
TR68143|c2_g1_i2	1.14	0.65	2.06	4.01	4.46	4.67	5.42
TR68143|c3_g2_i1	0.08	0.72	1.48	5.06	4.27	3.64	3.64
TR68143|c3_g2_i4	0.59	0.94	1.56	4.84	3.77	6.49	4.44
TR55424|c0_g1_i1	26.53	35.2	7.63	1.93	2.73	0.68	26.46
TR55424|c0_g1_i2	26.22	35.51	7.02	2.52	2.81	1.04	27.7
TR61523|c1_g1_i2	0.64	1.7	3	27.95	1.34	69.29	1.89
TR70172|c0_g1_i4	2.39	1.92	2.24	3.71	2.76	5.68	2.79
TR65647|c0_g2_i1	11.31	27.29	35.5	31.79	33.64	50.38	15.73
Mj_1_GCCAAT_L005_R1_001_(paired)_trimmed_(paired)_contig_4587	5.54	2.87	4.31	5.57	6.55	7.93	3.83
TR76313|c0_g1_i1	6.39	3.9	5.17	6.92	5.8	8.01	6.71
TR76596|c0_g3_i2	4.86	3.17	3.45	7.63	5.5	6.75	4.8
TR76596|c0_g3_i3	4.22	2.89	3.43	4.94	5.12	6.09	4.9
TR59889|c0_g1_i1	4.62	3.86	4.55	3.15	3.68	2.1	5.03
TR66620|c0_g1_i1	3.58	2.66	6	6.07	0.17	19.18	1.27
TR75160|c0_g2_i1	31.06	28.7	26.82	20.44	26.26	21.86	26.35
TR78970|c0_g4_i6	3.61	4	4.12	5	5.24	6.48	5.29
TR45515|c0_g1_i2	0.76	0.72	1.34	2.54	1.03	5.24	2.25
TR53615|c0_g1_i1	1.54	0.89	1.81	5.17	2.07	6.38	2.34
TR71158|c0_g1_i2	0.59	0.81	1.43	3.2	1.73	5.25	1.64
Mj_1_GCCAAT_L005_R1_001_(paired)_trimmed_(paired)_contig_1544	10.62	8.86	13.64	19.18	15.54	28.37	16.51
Mj_1_GCCAAT_L005_R1_001_(paired)_trimmed_(paired)_contig_18416	1.58	1.96	2.58	4.04	5.87	5.96	3.11
TR78990|c2_g2_i1	3.61	3.76	3.67	5.99	6.02	7.73	4.77
Mj_1_GCCAAT_L005_R1_001_(paired)_trimmed_(paired)_contig_60220	0	2.21	3.38	5.44	0	21.52	3.67
TR52781|c0_g1_i1	1.16	3.59	6.25	17.04	1.45	50.93	8.29
Mj_1_GCCAAT_L005_R1_001_(paired)_trimmed_(paired)_contig_2061	22.91	13.45	14.18	4.04	3.28	5.76	4.94
TR74974|c0_g1_i4	2.87	2.44	6.04	4.81	8.28	7.91	4.1
TR75577|c0_g1_i1	2.34	1.45	2.62	5.77	5.09	6.12	3.01
TR75577|c0_g1_i4	2.36	1.72	2.68	2.77	3.74	5.21	3.13
TR66410|c0_g1_i1	9.95	7.89	11	9.59	10.56	16.36	10.55
TR75494|c1_g2_i1	8.09	6.47	7.62	7.67	10.02	12.49	9.81
TR75494|c1_g2_i6	2.55	2.19	3.1	3.1	4.17	5.61	4.34
Mj_1_GCCAAT_L005_R1_001_(paired)_trimmed_(paired)_contig_6236	13.82	12.02	11.5	4.57	3.12	4.26	14.21
TR67558|c0_g1_i1	18.41	16.31	16.82	7.79	3.84	8	20.29
Mj_1_GCCAAT_L005_R1_001_(paired)_trimmed_(paired)_contig_93665	0	0	0	2.77	0	7.57	0
TR65635|c0_g1_i2	0.57	0.41	3.42	2.89	4.87	7.39	3.49
TR67051|c1_g1_i6	0	0.22	1.35	2.18	2.73	5.33	1.35
TR65930|c1_g1_i4	3.94	2.27	4.06	3.92	5.42	6.67	5.43
TR69014|c0_g1_i6	3.75	3.33	3.81	3.93	4.99	7.98	5.13
TR69014|c0_g1_i8	3.3	3.14	3.88	2.57	4.41	7.61	3.99
TR69613|c1_g1_i5	1.79	1.22	1.96	3.25	3.45	7.4	3.16
Mj_1_GCCAAT_L005_R1_001_(paired)_trimmed_(paired)_contig_34129	2.86	2.81	4.5	6.02	3.76	6.55	5.65
Mj_1_GCCAAT_L005_R1_001_(paired)_trimmed_(paired)_contig_7922	20.23	14.92	20.88	19.86	22.15	27.41	26.19
TR59118|c0_g2_i1	26.68	16.48	35.09	31.18	35.19	46.63	34.17
TR59118|c0_g2_i2	20.36	14.81	23.67	24.76	23.71	34.21	24.29
TR70789|c5_g3_i1	5.76	0.9	5.11	16.85	15.28	12.55	7.64
TR70789|c5_g3_i3	2.68	0.46	4.02	7.12	6.35	5.17	2.97
TR73997|c0_g1_i3	5	3.78	6.89	8.58	8.8	8.82	5.66
TR74313|c0_g1_i2	7.89	6.55	12.68	15.77	16.1	15.22	8.42
TR65964|c0_g1_i1	22.42	20.12	23.21	30.26	26.31	34.25	22.12
TR66389|c2_g2_i2	7.28	6.1	8.94	10.45	12.94	12.78	7.42
TR65723|c0_g1_i1	4.25	3.18	5.12	4.83	6.22	6.42	5.2
TR70736|c0_g1_i4	1.64	1.81	2.33	5.28	1.66	5.06	0.9
TR70736|c0_g1_i8	1.34	1.61	2	4.39	1.12	5.09	0.73
Mj_1_GCCAAT_L005_R1_001_(paired)_trimmed_(paired)_contig_5299	8.81	6.38	6.52	14.39	9.38	15	10.22
TR74287|c3_g1_i2	11.22	6.74	8.75	16.98	11.98	18.87	11.1
TR68546|c1_g2_i4	22.29	25.02	48.96	59.53	43.23	58	29.23
TR68546|c1_g2_i5	42.62	44.92	93.9	111.68	83.11	98.93	54.55
scaffold12598	28.56	25.04	49.76	59.47	45.87	59.22	33.24
scaffold12599	6.76	7.89	24.71	22.47	19.07	25.73	11.16
TR47325|c0_g1_i1	4.77	15.59	31.03	53.54	44	72.85	19.1
TR76269|c0_g1_i2	3.61	10.6	29.9	41.44	37.38	54.27	17.8
TR66049|c0_g1_i1	12.97	9.75	11.06	13.7	9.25	18.84	11.66
TR66049|c0_g1_i2	12.64	9.13	10.86	15.32	10.08	21.37	13.8
scaffold10224	10.08	7.24	9.33	11.85	9.71	16.66	10.19
TR72823|c2_g1_i1	2.03	1.88	2.28	3.46	5.96	6.95	2.66
TR73324|c0_g1_i3	13.07	7.97	11.68	19.75	15.07	21.85	11.96
TR73324|c0_g1_i4	6.46	6.17	5.49	5.69	5.36	10.74	5.66
TR59848|c1_g1_i1	0.13	0.12	0.15	5.84	7.21	3.52	3.63
Mj_1_GCCAAT_L005_R1_001_(paired)_trimmed_(paired)_contig_3992	4.83	4.97	6.92	8.42	6.55	8.77	7.71
TR79573|c2_g1_i3	6.23	3.74	4.52	6.39	5.21	6.84	3.49
TR77249|c1_g1_i2	2.78	2.73	3.66	4.33	5.54	7.91	3.64
TR77249|c1_g1_i3	3.28	3.03	5.5	6.8	5.52	7.64	4.22
TR77249|c1_g1_i4	2.01	1.91	5.14	3.61	7.86	7.78	1.64
TR77673|c1_g1_i2	2.84	3.53	4.24	6.45	7.18	9.4	4.7
TR77673|c1_g1_i5	1.21	1.04	1.35	2.18	2.39	5.44	1.41
Mj_1_GCCAAT_L005_R1_001_(paired)_trimmed_(paired)_contig_18340	3.22	2.71	2.38	3.46	2.71	5.11	3.13
TR79442|c1_g2_i1	3.59	3.54	2.11	3.99	3.94	6.65	3.89
TR60816|c0_g1_i2	2.31	2.22	7.49	11.4	10.29	14.01	4.26
TR60816|c0_g1_i3	5.59	5.15	12.08	17.65	22	22.87	6.34
TR74296|c0_g1_i4	8.12	8.12	7.17	4.66	4.83	5.38	6.16
TR74296|c1_g1_i4	14.96	9.09	17.75	19.37	30.36	21.87	16.79
Mj_1_GCCAAT_L005_R1_001_(paired)_trimmed_(paired)_contig_7318	24.52	23.56	27.03	37.95	36.1	46.72	27.19
Mj_1_GCCAAT_L005_R1_001_(paired)_trimmed_(paired)_contig_9452	20.63	19.09	27.03	32.19	32.91	42.87	21.69
TR74537|c0_g1_i1	14.83	16.39	24.94	29.37	31.39	43.47	17.77
TR74537|c1_g1_i1	18.98	17.41	22.2	30.03	27.56	36.78	20.44
TR75111|c0_g2_i1	3.27	3.94	3.93	3.09	3.61	7.23	3.83
TR75111|c0_g2_i2	5.6	4.63	4.68	5.32	5.48	8.93	6.17
TR75733|c0_g1_i1	5.13	4.53	5	5.17	4.46	8.04	5.28
TR51360|c0_g2_i1	0.76	0.18	0	3.16	2.55	10.22	1.21
TR55698|c0_g1_i1	0.13	0.44	0	2.41	6.61	4.03	0.52
TR55698|c0_g1_i2	0.07	0.55	0.08	4.83	6.18	9.82	1.64
Mj_1_GCCAAT_L005_R1_001_(paired)_trimmed_(paired)_contig_8178	3.44	2.58	3.36	4.94	5.17	4.86	3.3
Mj_1_GCCAAT_L005_R1_001_(paired)_trimmed_(paired)_contig_1732	4.03	3.73	4.33	7.45	4.89	10.96	7.35
TR73374|c2_g1_i2	3.57	3.26	3.64	6.3	4.84	9.72	5.48
TR68345|c0_g1_i1	0.24	1.14	7.4	7.73	0	31.39	2.28
TR64526|c0_g1_i2	14.61	9.49	12.01	22.15	17.82	32.73	13.96
TR66390|c0_g1_i2	16.13	11.61	16.09	23.82	19.02	38.54	15.4
Mj_1_GCCAAT_L005_R1_001_(paired)_trimmed_(paired)_contig_16956	0	0	0.9	7.23	3.5	14.08	0.4
TR56857|c0_g1_i1	21.97	18.95	33.39	37.54	42.96	41.32	28.28
TR74327|c1_g1_i3	77.87	42.76	70.91	89.22	66.78	85.74	51.62
TR49538|c0_g1_i1	13.24	13.21	42.39	30.94	36.27	67.08	14.09
TR67039|c0_g1_i3	0.69	0.47	1.62	2.5	3.39	5.46	2.71
TR71272|c1_g1_i1	0	0.21	0	12.39	7.66	14.59	3.96
TR71272|c1_g1_i3	0.18	0	0	12.03	6.47	15.22	3.2
TR71272|c1_g1_i4	0	0	0	9.89	9.06	16.52	2.56
TR71272|c1_g1_i5	0	0	0.5	20.18	21.21	20.91	5.85
TR72007|c0_g1_i3	0.49	0.23	0	5.8	4	8.91	2.41
TR72007|c1_g2_i5	0.2	0	0	4.41	5.64	8.81	3.13
C922682	0.22	0	0.26	7.06	6.31	7.4	2.85
TR64352|c2_g4_i4	0	0	0	0.76	1.44	5.33	0.95
TR71272|c2_g1_i2	8.57	6.8	5.66	11.07	6.24	11.37	7.19
TR71272|c2_g1_i4	6.8	6.08	4.72	11.58	5.77	11.03	7.12
TR71272|c2_g1_i6	7.84	5.72	4.72	13.56	7.95	12.34	8.29
TR72007|c1_g2_i2	0	0	0	5.15	2.98	7.2	0.99
Mj_1_GCCAAT_L005_R1_001_(paired)_trimmed_(paired)_contig_2384	8.63	14.15	10.11	11.99	13.1	24.33	19.05
TR68400|c0_g1_i1	9.51	14.07	12.24	11.07	14.77	27.98	20.71
TR64769|c0_g1_i1	2.28	1.83	2.95	2.39	3.19	6.3	5
TR70188|c0_g2_i1	3.87	3.61	4.71	4.64	4.89	12.78	8.71
Mj_1_GCCAAT_L005_R1_001_(paired)_trimmed_(paired)_contig_48511	1.95	4	16.04	23.29	22.84	89.43	2.07
TR59139|c0_g2_i1	0.46	0.29	2.89	34.35	52.79	55.38	2.57
TR59139|c0_g2_i2	0.19	0.18	2.01	33.41	56.96	46.07	2.06
TR59139|c0_g2_i3	0.25	0.71	5.85	53.38	79.4	88.83	6.59
TR59139|c0_g2_i4	0	0	3.12	34.99	55.66	46.7	3.26
scaffold107	0.29	0.14	3.4	23.87	42.82	40.46	1.71
Mj_1_GCCAAT_L005_R1_001_(paired)_trimmed_(paired)_contig_2859	23.85	26.29	29.27	29	20.21	39.62	24.39
TR78394|c1_g3_i1	32.36	33.61	36.74	34.58	24.86	51.18	32.53
TR78394|c1_g3_i3	30.15	33.4	36.02	34.12	23.54	48.47	28.84
TR68532|c0_g1_i5	1.99	2.05	2.93	10.21	2.57	15.17	3.17
scaffold11434	0.95	1.85	2.68	9.04	2.26	11.79	2.25
TR72584|c0_g1_i1	4.29	1.32	2.65	8.67	8.85	14.47	2.42
TR78992|c0_g1_i1	26.64	20.99	17.61	29.18	19.49	44.67	22.72
TR57535|c0_g1_i1	70.35	79.86	37.92	4.16	4.07	2.03	21.19
TR63351|c0_g1_i2	5.8	4.44	3.99	0.96	0.9	3.36	3.87
Mj_1_GCCAAT_L005_R1_001_(paired)_trimmed_(paired)_contig_272	26.09	30.99	38.55	73.82	46.63	69.71	28.31
TR43774|c0_g1_i1	3.88	4.21	6.37	60.52	66.12	75.6	12.91
TR58135|c0_g1_i2	3.16	1.59	0.21	6	7.1	6.74	2.25
TR61524|c0_g2_i2	3.73	2.77	0.64	7.82	9.42	9.22	2.7
TR61524|c0_g2_i4	2.05	1.65	0.37	4.27	5.69	6.95	3.04
TR59716|c0_g1_i1	40.92	43.67	83.59	153.21	112.49	103.13	189.82
Mj_1_GCCAAT_L005_R1_001_(paired)_trimmed_(paired)_contig_8794	8.92	6.95	11.24	8.07	14.04	21.26	11.4
TR68077|c2_g3_i1	11.1	9.32	13.82	7.95	13.71	22.43	15.27
scaffold10882	5.09	4.25	6.49	5.69	7.87	10.41	6.96
Mj_1_GCCAAT_L005_R1_001_(paired)_trimmed_(paired)_contig_66044	0.13	0.34	4.95	7.13	6.13	10.74	1.62
TR72127|c1_g2_i4	6.52	7.45	9.74	8.16	5.66	3.62	6.53
TR79447|c2_g8_i7	3.2	1.57	3.4	2.29	3.71	5.05	3.46
TR61882|c0_g1_i1	2.59	3.43	1.59	9.29	11.62	11.5	12.98
TR65757|c0_g1_i2	0.14	0.2	4.73	11.76	0.32	23.59	1.77
TR72594|c0_g1_i10	4.88	3.49	5.77	7.1	9.81	11.04	7.91
TR72594|c0_g1_i11	5.19	3.33	6.18	6.86	8.51	10.74	8.62
TR72594|c0_g1_i6	4.45	3.72	6.36	6.68	8.53	10.76	8.42
TR76594|c1_g1_i2	7.56	6.41	7.42	12	11.67	12.86	7.87
TR76594|c1_g1_i4	8.83	6.52	7.31	11.86	11.69	13.44	8.17
TR71975|c0_g1_i1	5.58	5.71	4.01	7.86	7.65	12.4	5.98
TR71975|c0_g1_i2	4.82	5.73	5.71	8.65	7.25	11.03	5.6
TR71975|c0_g1_i4	3.01	2.64	3.26	4.21	2.7	5.75	2.26
TR72236|c0_g1_i1	3.41	4.78	4.01	6.54	5.27	9.75	5
scaffold11143	3.19	2.94	2.29	3.48	3.64	6.01	3.06
TR59128|c0_g1_i3	2.13	5.71	12.05	28.43	36.07	82.39	5.44
TR62352|c0_g2_i2	1.68	6.3	11.89	26.55	29.7	97.04	3.32
TR62352|c0_g2_i3	2.31	7.35	8.92	22.66	22.5	73.69	5.07
scaffold10002	1.48	2.47	8.92	20.8	20.69	52.43	3.46
Mj_1_GCCAAT_L005_R1_001_(paired)_trimmed_(paired)_contig_87080	0	0	0.26	0	0	5.92	0
Mj_1_GCCAAT_L005_R1_001_(paired)_trimmed_(paired)_contig_19567	3.55	4.31	11.15	17.6	27.49	22.76	7.45
TR73511|c0_g1_i2	4.36	2.33	7.79	11.33	20.03	16.22	7.9
scaffold12806	5.38	5.03	14.45	18.49	36.78	27.07	12.96
TR79085|c2_g1_i1	2.8	0.82	2.79	3.07	5.13	4.05	2.33
TR79085|c2_g1_i2	14.03	13.45	14.21	12.71	8.64	9	11.83
TR69410|c0_g1_i3	6.65	6.09	3.66	2.67	4.74	2.62	7.33
Mj_1_GCCAAT_L005_R1_001_(paired)_trimmed_(paired)_contig_11113	12.05	11.21	28.93	38.5	46.4	36.99	31.2
TR51384|c0_g1_i1	23.64	18.9	42.02	67.56	69.26	58.34	47.06
TR72882|c2_g1_i2	12.47	11.67	8.49	2.01	1.68	0.08	2.22
TR72882|c2_g1_i3	6.87	9.49	8.31	2.99	2.34	0.14	2.3
TR73544|c0_g1_i2	18.34	19.23	15.43	2.61	2.19	0.2	3.66
Mj_1_GCCAAT_L005_R1_001_(paired)_trimmed_(paired)_contig_12261	6.16	5.27	2.85	0.35	2.62	2.19	4.33
TR75143|c0_g1_i2	12.62	11.09	10.17	1.37	2.22	0.64	5.18
TR63244|c0_g1_i5	10.85	10.7	7.88	2.9	3.32	0.8	10.4
Mj_1_GCCAAT_L005_R1_001_(paired)_trimmed_(paired)_contig_18311	3.21	1.73	4.27	3.98	5.01	7.12	4.4
TR59918|c1_g1_i1	12.82	14.19	9.07	7.86	9.54	6.67	11.76
TR70983|c0_g1_i2	4.04	19.95	18.06	7.3	9.19	27.83	3.44
TR79261|c2_g1_i2	4.5	18.79	17.62	6.22	6.49	27.66	3.8
TR75369|c1_g1_i6	5.62	4.75	3.76	2.64	4.59	2.13	3.65
Mj_1_GCCAAT_L005_R1_001_(paired)_trimmed_(paired)_contig_19959	2.28	1.81	0.75	3.83	2.47	7.33	2.25
TR60482|c0_g1_i2	14.79	14.88	13.76	14.81	23.21	26.22	14.62
TR47589|c0_g1_i1	3.58	3.31	0.48	3.59	4.54	6.85	2.28
scaffold10185	18.11	14.71	16.42	19.94	19.88	18.03	16.69
Mj_1_GCCAAT_L005_R1_001_(paired)_trimmed_(paired)_contig_4127	5.17	3.55	5.26	11.05	8.51	10.94	6
TR64405|c0_g1_i4	4.41	3.57	4.76	8.53	5.33	7.75	4.04
TR64433|c0_g1_i3	6.24	4.42	4.99	9.96	8.03	11.88	7.11
Mj_1_GCCAAT_L005_R1_001_(paired)_trimmed_(paired)_contig_2386	0.64	2.65	22.38	36.18	30.26	42.79	0.21
TR76715|c2_g1_i1	0.74	2.64	19.98	30.98	28.51	42.14	0.27
TR76670|c1_g1_i2	12.05	14.77	11.91	15.6	16.52	25.88	18.26
TR76670|c1_g1_i3	8.28	9.72	7.98	12.25	11.68	18.67	11.98
TR76670|c1_g3_i2	2.87	5.47	3.38	5.86	3.64	7.6	4.88
TR76670|c1_g3_i6	7.4	6.78	6.32	8.06	8.24	9.82	7.01
TR79819|c2_g2_i8	10.17	12.41	9.6	12.73	12.67	18.21	13.21
TR59873|c0_g1_i1	32.26	21.19	36.36	56.89	53.21	52.9	34.17
Mj_1_GCCAAT_L005_R1_001_(paired)_trimmed_(paired)_contig_10569	5.39	3.15	3.7	1.19	0.45	1	1.62
TR68738|c0_g1_i3	6.38	3.77	8.02	8.48	12.09	11.12	10.22
Mj_1_GCCAAT_L005_R1_001_(paired)_trimmed_(paired)_contig_3915	16.58	6.58	10.1	17.11	11.84	23.84	5.36
TR63667|c0_g1_i1	30.8	11.57	18.25	33.41	30.58	41.32	11.68
TR73138|c0_g1_i5	8.93	9.26	6.26	1.81	3.4	2.1	4.3
TR59746|c0_g1_i3	2.62	1.41	4.55	7.53	10.86	9.02	10.52
TR61890|c0_g1_i2	2.42	1.54	5.95	9.95	13.26	12.62	12.34
TR61890|c0_g1_i3	3.08	1.95	6.48	10.05	14.91	13.43	14
scaffold14423	2.55	1.41	3.6	7.4	8.05	8.48	10.69
Mj_1_GCCAAT_L005_R1_001_(paired)_trimmed_(paired)_contig_35580	0.85	0.68	1.42	5.75	0.54	8.7	3.17
TR56032|c0_g1_i1	18.11	16.49	17.24	12.19	11.68	13.34	11.99
TR72382|c0_g1_i3	0.87	1.2	1.65	4.71	3.5	7.36	2.64
TR74251|c0_g1_i1	0.78	1.64	1.55	5.36	3.15	9.07	4.42
TR74251|c0_g1_i2	0.87	1.62	1.68	6.38	2.56	10.48	3.88
Mj_1_GCCAAT_L005_R1_001_(paired)_trimmed_(paired)_contig_32362	6.3	6.93	11.45	18.71	13.74	16.9	11.62
TR62948|c0_g1_i1	21.39	22.73	39.49	60.2	44.06	57.58	28.27
TR74107|c1_g1_i1	7.3	4.61	5.91	11.18	9.42	14.87	8.78
TR74107|c1_g1_i2	3.09	1.4	3.64	6.45	4.86	5.95	4.49
TR63875|c0_g1_i4	4.03	3.93	4.74	6.12	5.77	5.51	4.7
TR63875|c1_g1_i4	2.75	2.81	2.82	3.75	3.42	5.57	2.49
Mj_1_GCCAAT_L005_R1_001_(paired)_trimmed_(paired)_contig_5348	12.36	7.82	6.61	5.36	7.41	2.5	9.43
TR72518|c0_g1_i1	22	25.4	21.62	9.62	9.74	8.4	18.39
TR58792|c0_g2_i2	1.49	1.42	3.4	2.89	5.33	3.59	3.1
TR59855|c0_g1_i2	2.29	2.36	2.81	5.32	6.01	4.36	3.68
TR62463|c0_g2_i3	5.71	3.44	6.14	10.86	10.87	13.2	7.98
TR60179|c0_g2_i1	12.9	13.72	8.22	10.89	3.37	9.11	16.39
TR70189|c0_g1_i4	1.42	1.51	3.18	4.69	3.76	6.65	1.64
TR70189|c0_g1_i5	1.13	1.48	2.02	5.35	3.85	6.65	1.66
Mj_1_GCCAAT_L005_R1_001_(paired)_trimmed_(paired)_contig_2543	3.63	3.46	35.55	74.62	3.59	163.24	6.44
[truncated: 5,992 more rows]
[truncated: 1 more columns]

## Sheet: TransM4
Table S11 Summary of transcript modules and the included transcripts using WCNA analysis for highly expressed transcripts in Mallotus japonicus.
Sequence_name	FPKM_Young_Leaf	FPKM_Mature_Leaf	FPKM_Young_Stem	FPKM_Mature_Stem	FPKM_Bark	FPKM_Central_Cylinder	FPKM_Inflorescence
TR44976|c0_g1_i1	15.17	11.72	2.29	0.62	2.61	0.43	3.06
TR55766|c0_g1_i2	37.63	28.17	61.66	73.11	75.34	72.94	53.07
TR65773|c0_g1_i2	16.05	12.36	28.03	30.65	23.17	32.33	20.99
Mj_1_GCCAAT_L005_R1_001_(paired)_trimmed_(paired)_contig_21786	2.59	3.6	5.08	4.31	4.86	5.33	3.94
Mj_1_GCCAAT_L005_R1_001_(paired)_trimmed_(paired)_contig_1013	559.36	1580.44	127.96	25.75	37.71	15.83	241.14
TR53991|c0_g1_i1	19.77	18.42	27.38	26.36	23.83	23.77	26.86
TR45918|c0_g1_i1	270.73	130.18	350.91	329.85	434.43	365.23	240.86
scaffold11810	129.84	61.83	174.78	167.45	219.76	183.97	127.33
Mj_1_GCCAAT_L005_R1_001_(paired)_trimmed_(paired)_contig_3128	73.89	96.12	39.02	46.93	38.95	39.75	50.78
TR31043|c0_g3_i1	46.8	88.16	3.8	12.66	2.7	0.75	2.37
TR106109|c0_g1_i1	18.44	15.84	2.37	5.66	1.39	0.69	2.14
TR71146|c1_g1_i1	5.84	11.82	5.51	3.89	2.65	3.1	5.5
TR50211|c0_g1_i1	7.48	2.42	9.51	12.51	9.89	15.26	9.09
Mj_1_GCCAAT_L005_R1_001_(paired)_trimmed_(paired)_contig_14743	4.12	7.12	1.98	3.7	2.18	1.81	1.43
TR59414|c0_g1_i2	7.54	9.95	5.44	3.51	2.67	2.22	4.57
TR54846|c0_g1_i2	25.91	25.79	15.47	11.73	12.93	9.74	17.17
TR59210|c0_g1_i4	5.85	7.08	1.01	0.45	1.07	0	2.39
TR60131|c0_g1_i3	12.93	13.7	3.07	1.07	1.45	0.64	2.48
TR69087|c0_g2_i1	20.61	14.58	3.19	1.71	1.21	0.6	6.4
TR69087|c0_g2_i3	19.56	13.81	7.6	1.5	2.55	1.05	7.11
Mj_1_GCCAAT_L005_R1_001_(paired)_trimmed_(paired)_contig_61070	13.07	12.17	2.12	0.52	0.98	2.17	2.09
TR54361|c0_g1_i1	2.99	2.25	5.02	5.74	5.4	6.37	4.62
C972538	48.9	48.71	4.95	12.5	17.45	20.33	15.11
TR66062|c0_g1_i2	9.12	12.98	6.34	0.87	3.13	2.44	4.01
TR68795|c1_g1_i1	18.09	16.67	3.68	0.93	1.61	1.52	1.74
TR58003|c0_g1_i1	5.75	4.94	3.15	1.69	1.76	0.5	2.98
Mj_1_GCCAAT_L005_R1_001_(paired)_trimmed_(paired)_contig_9923	12.35	24.59	4.69	5.98	8.24	4.64	6.05
TR50959|c1_g1_i2	11.1	41.04	0.49	2.5	0.51	0.31	0.86
TR29621|c0_g1_i1	8.39	15.88	1.23	0.42	0.2	0.15	0.52
TR72157|c1_g4_i1	3.57	5.84	0.44	1.59	0.44	0.19	0.57
TR68142|c3_g2_i1	11.18	24.5	2.34	8.7	1.89	1.29	1.73
TR68142|c3_g2_i2	6.24	14.37	1.21	4.5	1.6	1.02	1.23
TR50635|c1_g1_i2	2.67	7.04	0.5	6.92	2.05	0.24	1.04
TR53352|c1_g1_i1	2.82	7.98	0.56	9.89	2.45	0.12	0.92
TR53352|c1_g1_i2	1.91	7.66	0.35	8.02	1.89	0.08	0.84
TR53352|c1_g1_i3	2.51	7.18	0.28	8.18	1.98	0.16	0.95
TR53352|c1_g1_i4	2.34	8.11	0.38	9	2.26	0.29	1.12
TR53352|c1_g1_i5	2.13	7.29	0.35	9.36	1.75	0.27	0.99
TR53352|c1_g1_i8	2.31	8.22	0.58	8.93	2.46	0.3	1.13
scaffold10618	5.82	14.59	0.78	6.91	1.42	0.37	0.96
TR53352|c0_g1_i1	3.99	12.26	0.74	19.59	4.04	0.43	2.25
TR53352|c0_g1_i2	4.35	12.94	0.72	19.4	4.06	0.46	1.9
Mj_1_GCCAAT_L005_R1_001_(paired)_trimmed_(paired)_contig_6753	4.32	20.36	0.4	2.64	0.54	0.18	0.42
TR64626|c1_g1_i7	8.13	5.41	5.14	2.09	2.88	2.34	3.19
TR62594|c0_g1_i3	6.84	9.77	1.01	0.11	0.32	0.16	1.41
Mj_1_GCCAAT_L005_R1_001_(paired)_trimmed_(paired)_contig_8280	38.07	27.65	7.65	3.04	2.93	3.53	5.06
TR70953|c1_g2_i6	9.17	7.64	1.52	1.03	2.13	0.72	0.89
scaffold14345	10.67	10.99	3.93	3.17	5.98	4.62	6.08
Mj_1_GCCAAT_L005_R1_001_(paired)_trimmed_(paired)_contig_4429	6.08	13.55	2.88	0.77	1.17	1.02	3.51
TR64898|c0_g4_i1	5.95	4.1	0.28	0	0	0	0.94
TR77639|c1_g2_i1	6.26	5.2	0.49	0	0	0	1.85
TR63515|c0_g2_i2	6.88	4.1	1.47	0.4	1.97	0.07	3.15
Mj_1_GCCAAT_L005_R1_001_(paired)_trimmed_(paired)_contig_5535	60.96	124.99	9.43	2.5	3.21	2.22	18.2
TR67923|c2_g2_i11	8.91	11.21	2.72	2.03	3.34	2.04	5.89
Mj_1_GCCAAT_L005_R1_001_(paired)_trimmed_(paired)_contig_283	66.4	43.69	80.39	93.43	86.38	76.77	78.13
TR71298|c0_g1_i2	12.88	11.57	6.73	6.37	6.01	6.32	4.78
TR59150|c2_g1_i1	23.55	20.52	5.04	0.75	1.42	1.05	3.04
Mj_1_GCCAAT_L005_R1_001_(paired)_trimmed_(paired)_contig_7690	3.25	2.58	6.6	5.06	4.47	5.73	6.18
TR77268|c0_g1_i2	15.72	13.34	4.47	4.7	5.68	6.49	4.71
TR74645|c1_g6_i1	5.31	5.37	11.77	11.16	11.44	12.66	11.86
Mj_1_GCCAAT_L005_R1_001_(paired)_trimmed_(paired)_contig_118	1051.25	1506.75	412.37	26.08	45.82	31.9	425.19
TR75771|c0_g1_i5	6.55	8.01	2.43	2.74	3.87	3.49	3.82
Mj_1_GCCAAT_L005_R1_001_(paired)_trimmed_(paired)_contig_3794	36.89	64.84	17.68	1.4	1.85	0.49	14.92
TR66244|c0_g1_i1	46.73	88.27	21.87	1.47	1.75	0.89	15.33
Mj_1_GCCAAT_L005_R1_001_(paired)_trimmed_(paired)_contig_1284	16.64	21.82	3.74	2.48	1.97	3.41	8.07
TR78239|c3_g1_i4	29.74	37.02	9.26	3.27	3.95	5.09	13.86
TR69109|c0_g1_i1	13.9	49.77	33.33	8.37	4.02	6.13	21.72
TR65450|c0_g1_i1	9.54	4.71	2.17	1.6	1.82	1.18	1.56
TR68787|c0_g2_i1	11.97	15.67	2.8	1.54	3.38	1.15	7.31
TR68542|c1_g2_i7	4.74	6.29	1.02	0.23	0.54	0.32	0.5
TR73563|c1_g2_i2	31.64	63.94	9.34	1.42	2.98	1.49	13.58
TR73563|c1_g2_i4	20.68	43.96	7.01	1.86	2.49	1.23	8.31
TR74075|c0_g3_i6	15.72	33.31	5.22	1.09	1.11	0.65	6.67
TR71398|c0_g2_i2	16.18	13.51	2.76	0.53	0.67	0	2.75
TR51518|c0_g1_i1	1.17	8.41	0	0	0	0	0.07
Mj_1_GCCAAT_L005_R1_001_(paired)_trimmed_(paired)_contig_28440	1.18	1.31	10.14	9.74	10.86	12.83	9.68
TR48502|c0_g1_i2	15.6	24.48	4	1.18	3.5	1.3	9.43
Mj_1_GCCAAT_L005_R1_001_(paired)_trimmed_(paired)_contig_955	99.1	162.49	13.4	69.48	42.55	9.28	28.92
TR45307|c1_g3_i1	143.55	240.97	27.11	138.99	92.11	18.79	52.24
TR64027|c0_g1_i3	8.72	6.94	3.55	3.87	5.16	2.8	4.22
TR74303|c1_g1_i1	29.1	42.52	10.29	4.88	8.23	3.11	13.31
TR63763|c0_g1_i1	47.75	41.08	91.77	92.49	114.5	91.78	83.48
Mj_1_GCCAAT_L005_R1_001_(paired)_trimmed_(paired)_contig_3518	18.36	41.66	1.95	8.44	2.47	1.37	2.26
TR74683|c1_g2_i3	5.93	3.79	1.03	0.7	0.98	1.21	2.38
Mj_1_GCCAAT_L005_R1_001_(paired)_trimmed_(paired)_contig_3148	2.54	7.38	0.57	10.26	3.02	1.03	1.08
scaffold12624	39.32	29.91	58.35	65.64	50.39	55.05	48.06
TR54560|c0_g1_i1	66.66	45.47	99.66	103.77	99.24	85.27	78.67
TR71711|c1_g1_i6	5.46	4.41	0.55	0.58	0.77	1.09	1.48
Mj_1_GCCAAT_L005_R1_001_(paired)_trimmed_(paired)_contig_5959	85.31	55.98	13.03	6.35	6.43	6.01	17.86
TR75060|c4_g1_i2	16.43	16.9	7.51	3.56	4.82	5.41	8.34
TR77351|c0_g2_i1	5.79	3.59	0.51	1.38	2.17	1.13	1.14
Mj_1_GCCAAT_L005_R1_001_(paired)_trimmed_(paired)_contig_21734	11.84	14.02	5.61	5.83	6.31	4.84	5.64
scaffold1174	2.08	5.69	1.31	0.66	1.24	1.39	1.91
TR49409|c0_g1_i2	19.32	29.59	3.54	4.36	4.85	3.6	8.14
TR61263|c1_g5_i2	6.23	12.37	4.33	3.3	4.54	5.32	5.36
TR58907|c0_g1_i2	13.68	23.54	2.87	0.18	0.67	0.49	4.32
TR61044|c0_g1_i1	5.46	6.33	3.98	2.7	2.54	1.89	4.16
TR77774|c0_g1_i6	6.18	7.48	2.24	0	0	0	2.82
TR57727|c0_g1_i5	3.54	5.09	2.04	1.92	2.6	2.6	1.34
TR62844|c0_g1_i2	3.51	2.52	6.91	11.4	12.25	7.74	9.69
TR64381|c1_g1_i1	5.13	4.09	12.32	17.77	18.94	12.44	15.96
TR67594|c2_g1_i3	15.1	21.95	4.69	1.76	3.96	1.37	10.01
TR73455|c0_g1_i2	14.08	13.14	7.03	3.01	3.79	4.41	6.61
TR75060|c4_g1_i3	15.5	16.94	8.14	3.77	5.34	5.09	8.07
TR59512|c0_g1_i1	9.84	7.46	4.71	3.05	3	1.3	5.52
Mj_1_GCCAAT_L005_R1_001_(paired)_trimmed_(paired)_contig_15455	7.82	9.18	20.09	15.78	18.04	19.31	20.84
scaffold1100	12.24	10.32	6.1	0.33	2.47	0.69	1.23
Mj_1_GCCAAT_L005_R1_001_(paired)_trimmed_(paired)_contig_9736	18.57	26.48	17.97	9.58	10.36	8.59	13.49
TR60767|c0_g1_i2	50.91	65.62	38.97	24.73	21.61	24.07	35.48
TR64556|c0_g1_i3	6.32	7.14	2.25	1.21	1.14	0.42	3.39
TR64556|c0_g1_i4	7.24	10.6	2.76	1.01	3.49	0.71	2.72
TR39082|c0_g1_i1	260.06	280.6	33.04	64.95	42.82	50.9	64.05
TR70399|c1_g4_i5	8.72	5.5	3.28	2.35	3.32	2.67	3.29
TR77355|c2_g2_i3	6.4	2.96	0.24	0	0.62	0.46	1.02
TR63332|c0_g1_i1	50.32	32.84	9.93	5.85	3.95	4.28	12.3
scaffold13435	31.21	21.32	4.71	4.04	2	2.68	7.91
TR72911|c0_g1_i1	11.68	5.51	15.17	12.48	14.88	18.98	15.76
Mj_1_GCCAAT_L005_R1_001_(paired)_trimmed_(paired)_contig_10105	11.52	18.32	6.36	0.38	0.36	0.4	3.79
TR51811|c1_g1_i1	8.63	12.02	2.76	0	0.22	0.32	1.59
TR71666|c0_g1_i1	23.73	16.27	4.67	2.53	5.53	6.38	7.95
TR71666|c0_g1_i3	28.74	21.35	7.27	4.3	6.04	9.04	10.97
TR69248|c0_g1_i3	4.25	5.41	1.18	1.2	2.07	1.05	1.48
TR56309|c0_g1_i1	1109.8	3345.62	271.02	51.29	70.08	32.16	478.05
Mj_1_GCCAAT_L005_R1_001_(paired)_trimmed_(paired)_contig_2994	165.11	70.86	216.9	186.96	225.08	197.46	187.89
TR53084|c0_g1_i1	127.63	62.27	167.97	147.33	192.56	170.02	150
TR57287|c2_g1_i1	11.5	7.44	54.44	46.09	39.77	52.89	36.32
TR44967|c0_g1_i1	326.07	151.57	302.53	346.94	293.84	292.1	228.76
TR64279|c0_g1_i5	4.12	5.46	0.95	1	3.76	1.1	1.77
TR70958|c0_g2_i5	5.87	4.31	3.36	1.43	2.47	3.67	3.86
TR51231|c0_g1_i1	3.94	3.94	9.43	8.26	6.51	11.57	10.44
TR61710|c0_g1_i6	62.75	79.84	360.99	377.55	256.42	355.25	443.44
TR68664|c1_g3_i1	7.69	4.2	9.8	9.72	10.09	8.71	6.19
TR68700|c0_g1_i5	3.83	1.7	3.06	5.21	4.91	4.86	3.91
Mj_1_GCCAAT_L005_R1_001_(paired)_trimmed_(paired)_contig_6815	4.86	12.52	0.4	1.15	0.42	0.13	0.42
TR72157|c1_g1_i1	7.36	29.23	0.52	3.79	1.07	0.23	0.85
TR64038|c1_g2_i7	4.48	12.7	0.6	8.87	1.78	0.27	0.64
Mj_1_GCCAAT_L005_R1_001_(paired)_trimmed_(paired)_contig_7433	20.71	123.74	2.34	16.7	2.99	0.61	3.04
scaffold13429	17.61	100.14	1.95	14.04	2.83	0.76	2.49
scaffold13034	93.84	43.44	141.39	110.99	137.89	125.47	116.33
TR71761|c0_g1_i2	3.34	0.83	15.54	14.57	13.81	13.93	9.71
TR60548|c0_g3_i1	2.46	5.16	2.32	1.88	2.36	1.86	2.24
Mj_1_GCCAAT_L005_R1_001_(paired)_trimmed_(paired)_contig_5874	7.73	7.05	13.25	11.65	11.47	10.57	11.86
TR38700|c0_g1_i1	63.17	48.17	31.3	16.97	14.88	19.94	36.47
TR64141|c0_g1_i1	45.39	51.79	9.8	27.98	21.58	14.83	17.43
TR68467|c2_g5_i1	11.18	6.85	10.78	7.64	11.25	11.75	12.37
TR65744|c0_g1_i6	7.61	6.04	2.78	2.07	3.51	2.03	2.32
TR63683|c6_g2_i1	19.02	12.65	30.85	29.39	32.69	28.61	27.43
TR47946|c0_g1_i1	143.23	77.61	216.02	146.96	176.35	178.86	151.46
TR53630|c1_g1_i1	212.26	99.67	300.41	265.28	399.58	379.61	276.81
TR51225|c0_g1_i1	89.68	44.84	112.5	101.9	141.29	142.88	114.17
Mj_1_GCCAAT_L005_R1_001_(paired)_trimmed_(paired)_contig_6486	111.8	118.5	18.84	10.21	15.82	6.66	26.65
scaffold13522	61.51	66.62	11.81	6.5	9.68	4.55	13.28
TR49481|c1_g2_i2	9.42	7.17	16.74	15.83	20.07	16.39	15.9
Mj_1_GCCAAT_L005_R1_001_(paired)_trimmed_(paired)_contig_2588	21.09	33.43	7.27	5.44	6.15	7.6	12.16
TR61657|c0_g1_i1	39.11	60.93	17.6	9.79	12.18	11.63	24.04
scaffold10872	30.74	49.49	11.97	6.2	9.27	6.82	17.64
scaffold10873	26.2	41.95	9.53	4.03	6.47	6.22	15.78
TR71730|c0_g1_i1	11.8	8.62	6.09	6.3	4	6.53	5.71
TR71730|c0_g1_i2	5.64	4.26	2.21	2.43	1.94	1.57	2.44
scaffold11136	2.6	2.21	4.75	5.9	5.4	4.26	3.33
TR50952|c0_g1_i3	119.6	608.83	0.39	0.53	0.12	4.17	0.41
TR54772|c1_g1_i1	122.36	643.13	0.48	0.52	0	4	0.16
TR70503|c0_g3_i10	5.7	5.06	3.89	3.03	4.35	4.52	4.41
TR75198|c0_g2_i5	66.39	59.57	17.41	2.85	4.68	1.55	13.83
TR75198|c0_g2_i6	28.7	28.72	7.73	1.53	2.97	1.53	7.65
scaffold1171	51.54	23.53	62.86	52.73	71.38	45.87	48.33
TR62605|c1_g1_i3	7.84	3.76	1.44	0	0	0.27	2.89
TR59869|c0_g1_i1	64.8	38	26.33	18.25	14.31	12.48	19.88
TR77128|c1_g1_i7	6.02	8.36	2.16	0.53	1	0.28	2.31
TR56343|c0_g1_i3	6.22	4.47	7.72	8.05	9.54	8.58	8.24
TR56894|c1_g1_i1	10.46	10.49	2.01	0.45	0.32	0.63	2.67
TR54470|c0_g1_i2	14.52	9.33	5.58	5.25	6.23	5.43	4.11
TR47750|c0_g2_i3	2.07	5.46	0.3	0	0.77	0	2.29
TR79238|c0_g2_i3	5.17	8.75	5.02	5.54	4.06	3.73	4.46
TR76179|c0_g1_i2	24.11	51.53	12.94	3.03	4.72	7.38	5.75
TR65933|c1_g1_i5	4.42	9.32	0	1.05	3.62	1.96	2.39
TR67711|c0_g1_i2	13.13	25.11	2.71	1.12	1.35	0.11	6.92
TR61268|c1_g1_i10	4.76	2.96	4.5	2.69	4.95	5.46	5.01
TR60061|c0_g1_i3	6.26	7.16	0.57	0.76	1.08	0.27	1.9
TR67874|c0_g1_i1	24.33	28.75	2.71	2.83	5.33	1.98	13.6
Mj_1_GCCAAT_L005_R1_001_(paired)_trimmed_(paired)_contig_15201	32.58	56.94	11.27	5.53	9.68	3.46	12.64
scaffold12193	42.88	36.11	5.61	5.5	6.69	5.61	7.97
Mj_1_GCCAAT_L005_R1_001_(paired)_trimmed_(paired)_contig_8801	2.36	8.67	4.36	0.71	1.18	0	4.65
TR72022|c1_g1_i2	11.19	6.6	11.87	14.92	15.37	15.63	12.76
TR58348|c0_g1_i1	6.28	7.21	3.65	1.84	2.6	2.01	3.21
TR58348|c0_g1_i5	4.13	5.97	3	1.62	2.04	2.59	3.63
TR57712|c0_g2_i6	3.55	5.12	0.51	0	0.16	0	0.42
Mj_1_GCCAAT_L005_R1_001_(paired)_trimmed_(paired)_contig_264	17.41	10.59	5.45	5.6	8.48	4.75	11.8
TR63915|c1_g1_i8	15.57	13.93	5.71	3.11	8.04	3.22	10.25
Mj_1_GCCAAT_L005_R1_001_(paired)_trimmed_(paired)_contig_15849	7.07	5.56	7.1	7.97	8.02	8.27	7.69
TR56138|c0_g1_i1	19.52	27.18	7.62	0.32	1.21	1.8	5.19
TR78970|c0_g4_i2	3.55	5.59	0.9	0	1.13	0.28	2.74
TR46974|c0_g1_i2	1.78	7.07	0.3	0	0.38	0	3.5
scaffold12034	16.42	11.67	17.27	21.47	22.41	24.36	20.27
TR73040|c1_g1_i2	2.38	2.32	5.61	5.65	5.33	4.61	5.86
TR54419|c0_g3_i3	7.06	15.65	7.82	3.17	1.87	4.07	4.92
TR66062|c0_g1_i3	10.94	18.56	6.86	2.74	4.55	1.77	5.63
Mj_1_GCCAAT_L005_R1_001_(paired)_trimmed_(paired)_contig_4832	6.11	6.35	2.3	1.31	3.63	2.52	3.35
TR76427|c3_g2_i4	14.84	21.38	4.55	4.58	5.64	5.26	5.64
Mj_1_GCCAAT_L005_R1_001_(paired)_trimmed_(paired)_contig_15388	2.01	2.05	5.24	4.46	5.61	4.32	4.75
TR61045|c0_g1_i1	5.46	4.18	8.61	5.9	7.32	8.37	9.44
TR75500|c0_g2_i1	3.43	5.25	0.81	0.54	0.26	0.95	1.52
Mj_1_GCCAAT_L005_R1_001_(paired)_trimmed_(paired)_contig_4335	20.89	21.51	32.57	32.31	25.98	28.02	32.94
TR47497|c0_g1_i1	193.94	152.66	337.24	400.01	401.8	322.95	382.23
TR76686|c1_g2_i3	1.97	5.22	0.45	6.3	1.22	0.33	0.56
TR76686|c1_g2_i4	2.26	5.13	0.42	6.11	1.25	0.45	0.69
C966066	3.77	12.47	0.67	0.57	1.6	0.16	5.91
TR46974|c0_g1_i3	2.22	8.51	0.26	0	1.65	0.25	2.84
TR60623|c0_g1_i1	7.98	4.58	14.83	11.81	11.39	11.8	11.36
scaffold12235	43.47	46.06	6.82	4.69	6.09	6.76	15.89
scaffold12236	57.39	54.57	8.49	5.5	7.23	7.23	18.45
TR64038|c1_g2_i5	4.47	11.38	0.77	8.58	1.74	0.3	0.63
TR76072|c1_g1_i1	5.55	3.15	9.17	11.31	9.14	13.1	9.44
TR39579|c0_g1_i1	13.1	10.64	5.75	2.11	3.31	2.95	7.43
TR69499|c0_g2_i4	0.85	5.18	0.71	0	0.27	0.2	1.08
C968268	5.32	13.53	1.33	2.2	2.73	1.26	3.59
TR66137|c0_g2_i2	6.49	6.74	2.85	3.32	2.75	3.18	3.57
TR72921|c0_g1_i1	63.88	30.21	7.18	3.24	3.77	2.47	32.46
Mj_1_GCCAAT_L005_R1_001_(paired)_trimmed_(paired)_contig_7184	8.33	3.91	11.95	12.6	12.77	15.62	11.3
TR72681|c1_g2_i3	9.55	3.61	11.7	9.92	11.84	11.17	10.37
TR72681|c1_g2_i4	8.86	4.73	13.55	11.83	15.66	13.3	13.33
Mj_1_GCCAAT_L005_R1_001_(paired)_trimmed_(paired)_contig_6529	8.17	15.62	3.12	0.82	1.55	0.9	4.87
TR63648|c0_g1_i1	11.94	23.23	3.69	1.13	1.87	1.19	6.66
TR63648|c0_g1_i3	17.46	28.57	5.6	1.15	3.36	2.65	8.63
Mj_1_GCCAAT_L005_R1_001_(paired)_trimmed_(paired)_contig_1533	16.76	10.27	3.66	5.56	4.01	5.81	2.32
TR68894|c3_g1_i9	2.43	2.57	4.97	6.79	6.93	7.78	5.36
TR54989|c0_g1_i2	9.36	10.28	20.34	18.69	21.08	15.97	16.79
TR75805|c1_g2_i1	6.68	6.39	9.67	9.14	9.45	8.83	8.95
TR67794|c0_g1_i2	5.53	8.71	3.17	0.71	0.89	0.5	3.24
TR67794|c1_g1_i4	35.65	36.69	9.46	2.28	3.69	1.37	6.7
TR67794|c1_g1_i5	6.18	7.85	1.97	0.54	1.03	0.42	2.23
TR67794|c1_g1_i6	9.85	8.93	3.86	0.86	3.66	0.6	2.42
TR66034|c1_g1_i1	10.07	9.41	3.37	5.14	6.1	3.7	5.11
TR53955|c0_g1_i1	36.43	35.78	105.31	117.06	64.54	108.04	69.4
TR70770|c0_g1_i10	3.22	8.06	3.94	0.43	1	1.94	4.49
TR69026|c1_g1_i2	5.15	5.93	0.18	0	0	0	0.08
Mj_1_GCCAAT_L005_R1_001_(paired)_trimmed_(paired)_contig_6908	48.93	44.14	27.05	22.3	20.37	18.59	26.58
TR62504|c1_g1_i3	62.86	52.22	32.55	23.46	24.63	19.99	32.13
TR70312|c4_g4_i1	1.86	1.46	5.23	3.34	3.27	3.69	4.07
scaffold10404	5.22	3.57	10.17	7.84	9.23	8.71	8.88
Mj_1_GCCAAT_L005_R1_001_(paired)_trimmed_(paired)_contig_16715	5.75	10.36	13.76	14.88	13.29	11.6	12.23
Mj_1_GCCAAT_L005_R1_001_(paired)_trimmed_(paired)_contig_5210	13.77	12.53	8.95	5.72	6.66	9.89	7.22
TR67744|c0_g1_i1	13.8	16.03	11.37	9.03	9.36	11.83	9.32
TR67922|c1_g2_i3	7.22	7.53	5.68	4.05	4.49	5.06	4.63
scaffold10573	9.5	8.34	5.31	3.97	4.96	6.84	5.53
scaffold12741	29.3	21.34	48.91	51.48	47.09	47.65	36.11
TR71776|c1_g1_i2	4.1	9.03	1.3	0	0.24	0.17	3.73
TR69768|c1_g2_i5	5.53	3.35	3.1	0.98	1.45	1.47	1.91
TR75394|c0_g2_i2	14.74	17.59	4.71	0.79	0.34	0.81	4.86
TR75633|c0_g3_i2	12.43	17.41	4.3	0.73	0.27	1.02	4.06
TR75446|c1_g1_i2	3.89	2.36	5.04	3.62	5.2	5.83	4.45
TR62488|c2_g1_i1	243.83	144.63	47.06	7.14	6.3	4.41	85.19
Mj_1_GCCAAT_L005_R1_001_(paired)_trimmed_(paired)_contig_710	308.06	197.86	62.03	7.78	8.43	4.85	108.41
TR73312|c1_g6_i1	4.99	3.28	5.21	3.13	4.64	4.54	5.42
TR74186|c1_g1_i1	30.17	98.53	74.38	13.01	11.49	8.77	19.8
TR53597|c0_g1_i2	6.44	4.38	1.89	1.28	2.09	1.39	3.54
TR53597|c0_g1_i3	5.76	4.46	1.27	0.72	1.21	1.4	2.31
TR53597|c0_g1_i5	5.25	3.31	2.29	0.67	0.13	0.85	2.18
TR66233|c0_g1_i1	32.01	32.07	11.71	18.05	15.32	19.73	12.22
TR66244|c0_g1_i2	40.8	77.02	20.99	1.24	2.25	0.65	15.5
TR60270|c0_g2_i1	23	27.14	4.38	10.52	20.53	1.94	3.44
TR57142|c0_g1_i2	8.7	5.92	10.58	13.24	11.48	13.63	12.75
TR57142|c0_g1_i3	6.96	5.04	11.42	8.1	11.61	11.78	10.54
C973976	31.25	45.88	22.32	13.52	11.22	26.73	13.57
Mj_1_GCCAAT_L005_R1_001_(paired)_trimmed_(paired)_contig_401	23.96	34.15	16.73	8.8	9.61	19.75	10.78
TR76309|c2_g2_i2	45.79	65.76	33.72	18.56	18.25	39.55	19.79
TR77748|c0_g1_i2	14.2	16.15	1.52	1.61	2.45	1.77	2.75
TR67921|c1_g1_i4	5.89	4.66	0.53	0.36	1.25	0.67	0.87
TR54160|c0_g1_i2	3.12	14.59	2.62	1.41	1.11	1.65	2.63
TR54835|c0_g1_i2	3.18	8.19	2.8	0.5	0.24	3	1.88
TR66903|c0_g1_i3	6.2	4.96	0.26	0	0.17	0	0.22
Mj_1_GCCAAT_L005_R1_001_(paired)_trimmed_(paired)_contig_11480	6.56	5.95	1.84	2.24	2.34	3.39	1.77
TR63948|c0_g2_i1	10.51	7.53	18.23	14.89	17.42	15.45	19.08
TR55132|c0_g2_i2	3.25	1.09	2.94	5.5	5.49	5.14	5.69
TR55132|c0_g2_i6	4.71	1.66	4.59	7.93	5.05	6.68	8.05
TR56848|c0_g1_i4	2.18	5.35	0.89	0.13	0.25	0	1.82
scaffold11841	2.19	3.77	5.16	7.66	7.12	8.13	6.71
TR63733|c0_g1_i1	14.61	37.91	3.9	0.48	1.24	0.25	4.76
TR66702|c1_g1_i2	12.61	10.37	25.27	26	19.68	12.67	16.28
TR70562|c1_g1_i1	29.63	22.94	73.46	71.28	53.28	40.41	42.05
TR58722|c0_g1_i1	5.67	6.49	0.45	1.22	1.72	1.2	1.74
TR58722|c0_g1_i3	5.65	5.98	0.66	2	2.73	1.48	0.62
scaffold12972	4.46	5.48	0.51	1.37	2.05	1.12	1.21
TR69716|c0_g1_i4	8.13	6.45	5.12	3.41	3.21	4.77	5.5
TR65410|c0_g1_i4	5.38	4.2	8.4	8.67	7.45	6.55	8.49
TR65410|c0_g1_i7	5.89	3.81	7.02	8.9	8.28	5.98	7.76
TR76707|c3_g1_i11	6.08	3.99	7.9	10.35	8.61	7.33	9.6
TR76707|c3_g1_i4	6.57	4.12	8.69	9.81	10.68	8.68	8.36
TR76707|c3_g1_i6	7.92	4.76	8.88	9.04	8.86	9.83	8.27
TR61737|c0_g1_i1	10.27	11.09	21.56	24.29	23.82	12.48	18.33
Mj_1_GCCAAT_L005_R1_001_(paired)_trimmed_(paired)_contig_12922	13.64	14.13	4.97	2.45	2.65	3.73	4.78
TR77569|c0_g4_i2	13.11	14.84	5.03	2.46	5.71	4.37	5.22
TR77721|c0_g3_i1	14.22	13.8	5.14	1.86	3.84	3.72	4.66
TR66797|c3_g1_i1	20.34	17.28	26.26	20.37	23.63	24.53	24.08
TR47768|c0_g1_i1	4.02	1.28	14.65	24.87	4.57	1.27	1.51
Mj_1_GCCAAT_L005_R1_001_(paired)_trimmed_(paired)_contig_10352	6.76	7.87	2.35	1.31	2.59	2.75	2.05
TR78637|c0_g1_i3	5.63	4.32	2.55	0.76	2.55	3.02	1.94
TR78637|c0_g1_i4	5.16	6.49	3.28	0.7	2.2	2.32	2.12
TR78859|c0_g1_i1	5.28	4.85	2.65	0.9	2.21	2.51	2.4
TR78859|c0_g2_i2	6.41	6.31	2.06	0	1.74	1.72	1.91
Mj_1_GCCAAT_L005_R1_001_(paired)_trimmed_(paired)_contig_5242	15.19	17.79	4.36	0.19	0.72	0.67	4.25
TR64560|c0_g1_i1	20.6	24.48	5.62	1.52	2.65	1.36	6.19
TR65977|c0_g1_i1	29.09	31.52	9.88	1.87	4.69	0.73	8.62
TR65977|c0_g1_i2	24	26.1	8.96	1.96	2.95	1.23	7.1
TR65977|c0_g1_i3	12.49	14.74	5.59	0.98	1.98	0.69	4.34
TR65977|c0_g1_i4	17.65	20.29	5.42	1.83	2.59	0.75	5.12
TR55050|c0_g2_i3	5	2.57	5.66	3.05	6.88	6.39	5.68
TR73874|c0_g1_i1	11.28	12.89	3.8	5.35	5.57	6.2	4.34
TR73874|c0_g1_i2	10.6	10.56	4.37	4.83	5.59	6.73	3.94
TR74413|c0_g1_i3	6.76	5.3	2.45	3.85	3.11	3.46	4.78
TR75751|c0_g1_i2	2.46	5.52	3.42	0.8	1.71	0.21	1.37
Mj_1_GCCAAT_L005_R1_001_(paired)_trimmed_(paired)_contig_7270	10.99	12.6	13.24	14.63	13.66	13.3	15.19
TR57248|c0_g1_i2	44.39	84.75	85.95	107.97	126.69	99.17	105.1
TR64163|c2_g1_i1	8.07	9.62	5.44	2.74	4.12	1.92	3.71
TR64163|c2_g1_i4	5.36	4.42	2.92	1.35	1.96	1.17	2.46
TR64163|c2_g1_i6	5.45	4.38	3.56	2.09	1.87	1.69	2.53
TR64163|c2_g1_i7	6.07	6.51	4.07	2.81	3.46	3.25	2.43
TR64163|c2_g1_i8	4.63	6.42	2.46	0.95	2.91	1	2.51
TR78184|c1_g1_i4	3.66	5.54	7.54	6.05	7.98	9.31	8.27
TR65574|c0_g2_i2	3.43	5.68	1.81	2.24	2.84	2.26	2
TR67525|c0_g1_i1	13.23	4.97	23.83	25.21	22.96	32.38	33.24
TR67525|c0_g1_i3	5.02	1.69	9.08	11.21	11.6	14.53	12.55
TR70062|c0_g1_i3	5.72	5.72	9.28	9.43	11.14	7.68	7.89
scaffold1313	7.84	6.16	2.2	1.26	1.3	0.88	2.63
TR65353|c1_g1_i1	6.54	4.61	1.33	1	0.09	0.35	1.74
TR63273|c0_g1_i1	4.42	6.24	0.84	0.75	0.59	0.97	0.7
TR63273|c0_g1_i4	5.09	8.23	1.32	1.14	1.38	1.25	1.46
TR65868|c0_g1_i1	4.92	12.3	1.86	1.61	1.8	0.99	1.75
TR65868|c0_g1_i2	5.3	8.8	1.1	1.24	1.25	1.22	1.44
TR65868|c0_g1_i3	4.03	6.55	1.38	0.82	1.87	1.06	1.45
TR64349|c0_g1_i1	18.57	28.3	9.18	1.37	1.05	0.43	4.93
Mj_1_GCCAAT_L005_R1_001_(paired)_trimmed_(paired)_contig_973	460.16	576.71	151.76	15.01	19.11	14.05	159.87
TR44555|c0_g1_i1	397.2	488.35	131.7	17.09	19.3	15.39	136.42
TR77795|c0_g1_i5	4.9	6.34	2.17	0.82	1.72	1.03	2.84
TR57600|c0_g1_i1	31.35	29.17	5.49	0.55	0.42	0.47	5.02
TR57600|c0_g1_i2	16.12	14.63	3.49	0.55	0.92	0.38	3.76
TR57600|c0_g1_i4	17.37	15.06	2.17	0.97	0.3	0	3.22
TR57653|c0_g1_i1	18.11	18.48	3.72	0.65	1.15	0.28	4.39
Mj_1_GCCAAT_L005_R1_001_(paired)_trimmed_(paired)_contig_16765	32.37	35.21	66.51	63.49	79	64.72	59.95
Mj_1_GCCAAT_L005_R1_001_(paired)_trimmed_(paired)_contig_1935	52.89	77.19	46.49	53.63	49.98	45.24	57.9
Mj_1_GCCAAT_L005_R1_001_(paired)_trimmed_(paired)_contig_905	111.64	144.35	43.86	6.79	4.96	6.29	40.83
TR58414|c1_g1_i1	81.79	105.37	35.58	4.58	3.62	3.65	33.97
Mj_1_GCCAAT_L005_R1_001_(paired)_trimmed_(paired)_contig_3548	7.34	18.14	0	0	1.34	0.2	1.94
TR63416|c2_g2_i1	7.68	20.78	0.13	0.53	1.5	0.25	1.87
TR75524|c1_g1_i1	26.28	56.76	1.26	1.26	3.05	0.63	7.25
scaffold11792	4.81	7.11	0.99	0.1	0	0	1.67
TR53067|c0_g1_i1	21.89	20.21	6.28	2.66	2.08	0.62	8
TR60230|c0_g1_i1	27.92	20.89	12.59	17.04	16.27	14.48	18.39
TR69879|c0_g1_i1	42.62	33.91	9.22	6.24	11.15	5.41	9.79
Mj_1_GCCAAT_L005_R1_001_(paired)_trimmed_(paired)_contig_1740	34.62	27.43	5.29	3.04	4.02	1.07	7.27
TR64569|c0_g1_i1	67.42	51.87	7.97	7.72	6.47	3	12.16
scaffold12993	39.31	31.44	6.06	4.52	2.93	1.78	7.36
Mj_1_GCCAAT_L005_R1_001_(paired)_trimmed_(paired)_contig_18843	14.56	12.42	16.65	19	16.05	15.27	17.06
TR67365|c0_g1_i1	18.83	16.41	23.15	22.34	22.28	20.09	20.68
scaffold11903	10.73	10.79	13.98	14.49	14.53	11.43	12.85
scaffold11904	9.71	10.27	11.55	11.98	11.53	10.72	10.83
Mj_1_GCCAAT_L005_R1_001_(paired)_trimmed_(paired)_contig_697	7.55	20.71	1.27	2.98	0.8	5.95	0.53
TR68342|c0_g1_i1	21.33	36.23	1.61	5.38	1.4	14.18	1.14
TR76708|c0_g2_i1	5.29	12.38	4.9	1.59	3.33	0.76	4.87
TR76708|c0_g2_i3	4.38	11.01	4.54	2.03	2.99	0.76	3.78
TR76708|c0_g2_i4	3.63	9.32	4.03	1.42	2.98	0.92	3.11
TR76810|c0_g1_i1	4.19	10.53	4.31	1.46	2.56	0.58	3.8
TR76810|c0_g1_i2	3.51	9.21	3.88	1.6	2.37	0.72	3.4
TR76810|c0_g1_i4	7.16	15.27	6.46	3.63	5.24	2.03	8.41
TR76810|c0_g1_i5	4.05	8.7	3.74	1.01	2.5	0.53	3.14
TR61716|c0_g1_i1	232.62	298.53	63.22	11.55	14.21	16.03	99.4
TR61716|c0_g1_i2	230.38	297.88	63.22	11.19	15.76	14.8	100.35
scaffold10103	178.38	230.54	51.87	8.03	10.47	11.99	80.11
Mj_1_GCCAAT_L005_R1_001_(paired)_trimmed_(paired)_contig_299	14.99	21.5	6.64	6.08	4.39	4.52	8.2
TR76384|c0_g1_i4	22.33	27.65	7.98	8.07	10.82	7.01	13.21
TR76384|c0_g2_i2	9.07	11.07	3.41	2.96	2.88	2.68	3.78
TR72494|c1_g1_i3	6.81	4.53	1.69	1.15	0.68	1.56	2.24
TR76791|c0_g1_i4	6.15	4.21	1.52	1.69	1	1.58	2.67
TR76791|c0_g1_i5	5.66	4.64	1.7	1.18	1.06	1.98	2.16
TR76791|c0_g1_i6	6.06	4.06	1.55	1.3	0.99	1.56	2.46
TR71681|c0_g1_i1	26.5	20.18	10.34	12.16	11.54	15.52	9.72
TR71681|c0_g1_i2	22.68	18.02	9.4	7.25	6.48	9.3	8.59
TR72516|c0_g3_i4	21.34	21.1	5.7	8.89	9.28	6.89	8.66
Mj_1_GCCAAT_L005_R1_001_(paired)_trimmed_(paired)_contig_17643	2.27	3.64	5.13	3.05	4.28	4.22	4.57
TR53639|c0_g1_i2	10.37	5.92	0.59	1.86	1.25	2.97	2.64
TR53639|c0_g1_i4	11.42	6.51	1.12	4.02	0.95	1.94	2.34
TR55435|c0_g1_i2	9.38	6.06	1.03	1.73	1.62	1.45	1.93
TR57268|c0_g1_i1	40.86	31.41	23.11	35.62	22.59	25.31	22.62
TR55700|c0_g2_i4	16.78	18.62	3.19	4.17	3.78	5.18	5.76
TR74239|c1_g1_i1	15.52	17.11	4.16	4.21	5.19	4.45	5.75
TR74239|c1_g1_i2	15.07	18.01	4.66	3.99	4.5	4.01	5.95
TR74239|c1_g1_i3	20.48	24.21	5.98	3.93	5.79	4.64	7.81
TR78966|c0_g3_i12	2.53	5.22	1.89	0.86	0.95	0.88	2.01
TR77288|c0_g3_i3	4.32	6.23	3.18	0.74	1.24	1.9	3.03
TR67278|c0_g1_i1	45.48	23.55	6.8	9.11	6.93	6.14	6.42
TR75517|c1_g2_i3	5.25	6.76	8.48	8.12	9.7	9.12	7.98
TR73581|c0_g1_i1	20.86	15.9	10.29	6.79	9.44	7.81	10.3
TR64264|c0_g1_i2	5.91	2.84	5.32	7.42	8.25	7.44	7.9
C954748	7.38	7.88	1.56	0.88	0.66	1.47	0.54
TR75364|c0_g1_i3	8.2	12.33	5.95	1.44	2.23	1.7	4.72
scaffold14531	5.53	3.96	5.65	8.09	7.91	7.79	7.21
TR68368|c0_g2_i1	69.9	70.45	10.47	6.54	9.77	9.66	23.17
TR67879|c0_g5_i1	8.62	6.43	11.61	14.34	11.77	12.55	12.2
TR67879|c0_g5_i2	6.81	4.5	7.67	10.2	9.45	6.89	8.44
TR63980|c0_g2_i2	6.94	4.31	9.53	6.17	8.17	9.1	7.91
TR65595|c2_g1_i2	22.32	32.13	3.46	1.26	2.5	0.44	4.32
TR65595|c2_g1_i3	28.38	43.91	4.53	1.34	3.15	0.62	5.94
TR65595|c2_g1_i4	31.7	48.44	4.31	1.4	2.84	0.28	3.49
TR65697|c0_g2_i3	19.71	30.06	2.56	0.58	1.63	0.29	2.45
TR72753|c0_g2_i1	6.77	8.62	2.15	0.37	0.8	0.39	1.22
TR72753|c0_g2_i3	5.36	6.78	1.04	0.37	0.35	0.21	1.29
TR72753|c0_g2_i5	12.39	14.21	2.37	0.71	0.34	0.5	2.73
TR73728|c0_g2_i1	6.7	7.77	1.91	0.67	0.63	0.41	0.88
TR73728|c0_g2_i4	6.33	6.5	1.95	0.47	0.64	0.19	1.18
scaffold13245	5.19	7.25	1.36	0.31	0.1	0.21	1.2
TR64625|c0_g2_i2	35.9	50.95	12.24	7.91	9.37	7.18	9.61
TR66859|c0_g1_i2	30.4	48.48	11.66	8.58	11.12	5.66	9.19
TR59897|c0_g1_i2	15.66	11.22	13.96	17.93	17.13	18.96	17.69
TR60467|c0_g1_i1	13.47	10	16.67	17.39	16.23	19.63	17.1
TR49049|c0_g1_i1	4.59	2.8	6.14	4.96	5.91	6.7	5.34
TR49049|c0_g1_i2	4.6	3.78	7.97	5.69	5.74	7.81	8.32
TR66525|c1_g1_i1	72.9	60.13	16.57	8.85	10.43	6.04	11.96
Mj_1_GCCAAT_L005_R1_001_(paired)_trimmed_(paired)_contig_2292	29.23	37.7	5.89	3.35	4.5	3.87	7.21
TR75416|c0_g1_i3	45.65	60.45	9.48	5.7	7.55	6.74	11.8
TR76023|c0_g1_i3	43.22	58.01	7.45	5.24	7.15	5.55	10.47
Mj_1_GCCAAT_L005_R1_001_(paired)_trimmed_(paired)_contig_22996	6.5	2.7	8.42	9.6	9.36	8.15	7.25
TR77661|c0_g2_i3	4.35	6.33	1.34	2.4	3.39	1.26	2.24
TR79646|c1_g1_i10	13.3	15.49	4.38	4.09	7.56	3.59	7.13
TR69357|c0_g2_i3	6.85	6.22	3.24	3.6	5.18	5	4.24
TR55595|c0_g1_i1	6.26	4.95	3.58	2.47	2.51	2.35	4.29
TR55595|c0_g1_i2	13.3	14.5	6.4	6.13	8.79	6.53	9.83
Mj_1_GCCAAT_L005_R1_001_(paired)_trimmed_(paired)_contig_11393	3.09	6.12	2.27	2.26	2.06	1.63	1.61
TR71685|c0_g1_i10	4.16	6.73	2.13	2.04	1.93	1.73	2.45
TR71685|c0_g1_i2	3.44	7.78	2.61	2.23	2.58	2.37	2.01
TR71685|c0_g1_i9	3.98	6.65	1.85	1.6	1.97	1.95	2.72
TR71690|c0_g1_i1	4.41	8.47	2.33	2.46	2.25	2.76	3.05
TR71690|c0_g1_i3	2.46	5.26	1.86	1.31	1.01	1.38	1.48
TR49597|c0_g1_i1	26.49	26.89	55.42	60.8	45.18	60.12	37.65
C960134	16.09	14.27	6.6	3.36	3.45	3.07	5.08
TR56336|c0_g1_i1	22.35	20.43	14.45	6.79	7.06	4.92	8.21
TR68649|c1_g2_i2	21.44	18.5	13.11	8.26	7.92	8.21	10.26
Mj_1_GCCAAT_L005_R1_001_(paired)_trimmed_(paired)_contig_4033	2.62	5.17	2.78	1.93	3.17	2.21	3.47
Mj_1_GCCAAT_L005_R1_001_(paired)_trimmed_(paired)_contig_3708	35.08	36.67	14.07	2.51	4.06	3.14	8.24
TR61190|c1_g1_i1	61.22	73.15	28.35	7	5.66	5.03	16.93
scaffold12963	68.56	82.61	31.29	6.74	6.35	4.19	15.66
TR76468|c1_g1_i1	16.95	11.9	6.95	3.81	5.78	5.53	8.88
TR76468|c1_g1_i2	10.26	7.61	4.38	3.7	5.55	5.89	6.6
TR76468|c1_g1_i4	18.66	13.34	8.25	6.12	8.06	7.01	9.1
TR64939|c0_g1_i1	9.73	7.3	4.74	2.87	2.7	1.85	5.07
TR64939|c0_g1_i2	8.98	10.81	4.89	2.32	1.18	2.12	4.21
TR73494|c0_g1_i1	17.19	17.42	7.71	1.88	2.44	1.92	5.84
TR74811|c0_g1_i1	10.1	13.14	4.48	1.43	1.99	1.82	4.4
scaffold11505	8	8.58	3.06	0.74	1.61	0.78	2.71
TR72002|c1_g1_i1	23.22	33.27	10.05	1.07	1.44	0.75	9.95
TR72002|c1_g1_i3	11.2	23.06	7.06	0.25	0.94	0.88	7.78
scaffold11711	8.4	13.59	4.99	0.24	0.22	0.75	5.36
TR66042|c0_g1_i1	9.81	13.53	5.3	0	0	0	3.14
Mj_1_GCCAAT_L005_R1_001_(paired)_trimmed_(paired)_contig_15710	7.6	6.72	2.36	1.13	2.04	1.12	3.32
TR72246|c0_g1_i2	13.39	11.87	2.83	2.99	1.73	1.28	4.85
TR73175|c0_g1_i3	5.2	5.31	2.19	1.06	1.15	1.01	2.64
TR68559|c0_g1_i3	5.73	4.62	0.42	0	0.27	0.4	1.06
TR68559|c0_g1_i4	24.18	26.71	1.42	0.38	1.21	0.81	4.94
TR74655|c1_g2_i4	13.7	6.44	13.71	13.28	12.76	13.95	9.41
scaffold12626	2.56	2.7	6.09	8.6	6.96	7.91	8.24
TR67583|c0_g1_i2	57.98	70.99	7.84	3.57	7.05	3.99	15.52
TR67583|c1_g1_i1	43.98	63.49	6.86	3.45	5.51	2.35	12.47
TR67732|c2_g1_i5	14.25	16.01	24.58	28.63	24.67	20.16	18.1
TR72572|c0_g2_i2	5.61	3.81	2.52	2.33	2.33	2.34	2.48
Mj_1_GCCAAT_L005_R1_001_(paired)_trimmed_(paired)_contig_3625	124.3	91.04	198.27	175.5	196.91	170.95	152.42
TR74147|c0_g1_i2	15.87	13.24	19.09	19.18	16.41	19.9	17.23
TR64571|c0_g1_i1	24.92	69.45	5.11	8.5	12.19	10.88	14.56
TR64571|c0_g1_i2	20.76	61.13	4.31	9.16	9.03	7.19	13.95
TR67114|c1_g1_i1	17.28	54.45	3.95	7.07	8.2	7.9	11.03
TR45204|c0_g2_i1	7.48	10.54	6.33	0.37	1.74	1.55	3.68
Mj_1_GCCAAT_L005_R1_001_(paired)_trimmed_(paired)_contig_1553	17.13	52.45	22.43	0.7	0.22	0	19.95
TR61029|c0_g1_i1	37.76	107.46	43.4	1.18	3.35	1.16	40.48
TR73228|c2_g2_i2	7.49	7.99	1.85	3.04	6.76	0.77	3.43
TR60348|c0_g1_i1	4.27	11.61	4.77	0.18	0.17	0	5.54
TR57932|c0_g1_i2	34.29	29.8	14.96	2.13	4.45	1.36	9.41
TR60445|c0_g1_i1	68.82	57.58	21.05	3.5	6.44	1.22	16.47
TR70950|c1_g5_i2	14.9	12.38	21.9	24.73	18.2	25.71	20.74
TR74376|c1_g1_i2	2.06	2.39	5.38	3.75	3.53	3.93	3.93
Mj_1_GCCAAT_L005_R1_001_(paired)_trimmed_(paired)_contig_4187	7.39	8.86	1.28	0.6	0.52	0.42	2.19
TR77971|c0_g1_i2	8.53	11.4	1.85	0	0.2	0.29	3.63
TR77971|c0_g1_i4	8.83	11.54	1.64	0.55	1.19	0.29	2.61
TR78163|c0_g1_i2	10.83	13.19	2.15	0.73	1.42	0.54	4.2
TR78163|c0_g1_i5	10.94	11.87	1.73	0.81	1.4	0.57	3.49
TR79691|c1_g3_i2	5.19	2.64	5.55	2.87	5	5.19	6.58
TR57623|c0_g1_i1	170.58	110.32	36.34	26.32	32.6	15.92	41.21
TR74983|c0_g1_i1	2.96	2.07	4.56	5.41	5.23	5.2	4.77
TR74983|c0_g1_i2	3.16	1.72	4.83	5.39	6.51	4.53	4.1
TR73548|c1_g1_i1	54.61	81	30.87	21.39	28.14	24.01	32.17
Mj_1_GCCAAT_L005_R1_001_(paired)_trimmed_(paired)_contig_1624	81.02	84.05	24.28	22.12	15.97	12.33	25.77
Mj_1_GCCAAT_L005_R1_001_(paired)_trimmed_(paired)_contig_6525	11.32	10.59	2.76	1.92	2.26	1.75	4.34
TR61066|c0_g1_i3	22.86	21.2	7.52	6.42	4.67	5.9	8.63
Mj_1_GCCAAT_L005_R1_001_(paired)_trimmed_(paired)_contig_4505	13.88	44.29	6.01	3.21	5.51	2.89	4.9
TR67552|c0_g1_i2	17.95	58.53	9.28	3.53	8.01	4.82	6.65
Mj_1_GCCAAT_L005_R1_001_(paired)_trimmed_(paired)_contig_25	69.26	42.21	17.13	8.68	12.3	13.33	17.21
Mj_1_GCCAAT_L005_R1_001_(paired)_trimmed_(paired)_contig_45206	12.98	17.85	2.18	1.72	3.93	1.71	4.27
TR45002|c3_g1_i1	18115.4	34344.9	1772.27	570.68	1026.33	340.94	3383.13
Mj_1_GCCAAT_L005_R1_001_(paired)_trimmed_(paired)_contig_685	65.96	40.13	12.99	4.62	6.72	3.91	13.28
TR74499|c0_g1_i1	79.52	54.82	15.62	7.39	8.12	6.03	15.83
TR74499|c0_g1_i2	61.99	35.97	12.64	9.34	12.44	7.25	11.35
Mj_1_GCCAAT_L005_R1_001_(paired)_trimmed_(paired)_contig_4816	28.13	47.24	11.15	2.99	4.82	4.77	18.34
TR57581|c0_g1_i1	31.48	51.19	10.5	9.44	9.3	4.5	24.92
scaffold13626	22.61	37.51	8.03	6.37	6.11	2.31	19.07
TR65775|c1_g1_i3	8.77	7.62	4.8	3.96	3.84	4	4.5
TR65775|c2_g1_i3	26.4	17.62	9.36	8.19	7.11	7.65	11.11
Mj_1_GCCAAT_L005_R1_001_(paired)_trimmed_(paired)_contig_7299	90.76	131.97	35.73	16.63	16.27	18.13	34.33
Mj_1_GCCAAT_L005_R1_001_(paired)_trimmed_(paired)_contig_10977	18.33	18.36	4.01	1.25	2.55	2.91	5.3
TR56790|c1_g1_i1	20.53	21.49	6.56	1.27	3.19	2.76	6.73
TR56790|c1_g1_i2	15.49	14.12	3.83	1.37	2.44	2.77	4.82
TR56790|c1_g1_i3	6.37	8.49	2.94	0.36	0.34	0.75	3.13
Mj_1_GCCAAT_L005_R1_001_(paired)_trimmed_(paired)_contig_76	325.63	395.96	40.28	23.17	29.19	34.94	84
TR76183|c0_g1_i1	285.38	341.31	31.77	20.82	21.86	29.34	72.9
scaffold11954	303.66	371.54	35.96	22.33	23.19	30.9	74.44
Mj_1_GCCAAT_L005_R1_001_(paired)_trimmed_(paired)_contig_21427	7.95	18.43	0.51	0.68	0.8	0	0.64
Mj_1_GCCAAT_L005_R1_001_(paired)_trimmed_(paired)_contig_3520	18.45	50.09	13.33	7.17	9.5	9.78	12.16
TR64495|c0_g1_i1	17.84	48.21	11.02	6.99	9.72	10.1	12.28
TR64495|c0_g1_i3	13.34	37.64	6.25	5.77	4.99	5.22	8.22
TR75771|c0_g1_i10	6.5	7.05	1.71	2.06	2.5	2.88	3.51
scaffold11158	4.92	5.93	1.47	2.3	1.77	2.05	2.85
TR60492|c0_g1_i2	21.77	14.78	4.33	2.68	2.98	3.23	4.23
TR74904|c0_g2_i1	35.21	21.33	7.66	2.69	5.71	2.98	7.11
TR60068|c0_g1_i1	42.85	42.68	5.06	1.8	3.9	0.63	9.04
TR64137|c2_g1_i3	5.06	2.42	1.79	0.4	0	0	0.75
TR64137|c2_g1_i5	27.12	31.7	4.33	4.24	4.55	0.61	6.35
scaffold1095	11.98	14.25	2.53	1.95	2.61	0.46	2.93
scaffold1097	10.9	12.03	1.65	0.79	0.99	0.09	1.96
TR64648|c0_g1_i1	3.89	3.62	7.76	5.52	6.34	6.22	8.18
scaffold11139	11.87	8.75	15.02	16.45	16.58	18.41	15.31
TR61995|c0_g1_i3	8.88	8.08	1.29	1.3	2.04	1.21	2.7
TR61995|c0_g1_i4	9.61	10.53	2.14	1.03	1.75	1.59	2.56
TR61995|c1_g1_i2	8.43	7.91	1.3	1.76	1.45	1.69	0.95
Mj_1_GCCAAT_L005_R1_001_(paired)_trimmed_(paired)_contig_4665	56.81	76.32	5.61	1.85	3.83	1.16	32.79
TR68644|c0_g1_i1	19.05	24.1	9.66	7.77	4.98	11.31	14.08
scaffold12125	21.6	21.27	13.13	7.81	7.59	14.22	13.86
Mj_1_GCCAAT_L005_R1_001_(paired)_trimmed_(paired)_contig_4452	35.32	26.93	15.73	3.04	7.78	9.2	15.9
TR79723|c2_g10_i1	26.11	21.93	8.33	3.44	3.64	4.8	9.36
TR79723|c2_g10_i2	27.17	19.45	14.16	3.28	3.4	6.2	11.23
TR79756|c0_g11_i1	66.27	48.79	27.25	7.11	15.18	17.46	28.35
TR79756|c0_g1_i1	17.29	15.58	5.01	1.74	2.26	2.74	6.77
TR79756|c0_g1_i4	16.12	16.58	5.47	0.49	3.01	2.06	5.81
Mj_1_GCCAAT_L005_R1_001_(paired)_trimmed_(paired)_contig_18225	5.78	3.75	8.82	7.44	8.09	9.22	8.44
TR57399|c0_g1_i1	5.02	2.83	3.61	4.44	5.86	4.66	4.13
TR61459|c0_g1_i1	9.95	8.27	15.09	17.58	15.82	19.17	13.74
TR76565|c0_g1_i1	5.88	8.54	2.29	2.36	3.22	3.13	3.43
TR76565|c0_g1_i2	4.66	5.91	3.66	2.75	3.46	4.17	3.53
TR76565|c0_g1_i4	7.17	9.05	2.92	1.91	4.4	2.82	3.05
TR76565|c1_g1_i3	7.28	11.19	0.45	0.6	1.14	0.42	1.2
Mj_1_GCCAAT_L005_R1_001_(paired)_trimmed_(paired)_contig_1404	632.68	870.91	149.28	16.67	10.77	22.41	169.93
TR39188|c0_g1_i1	336.2	445.97	79.7	10.75	4.25	10.68	84.26
TR52908|c0_g1_i1	1.84	1.57	8.65	8.77	7.11	12.06	7.16
TR60967|c0_g1_i1	109.78	244.29	43.8	17.13	32.47	12.36	88.61
TR65791|c0_g1_i1	10.08	16.23	4.81	9.47	5.5	4.03	7.47
Mj_1_GCCAAT_L005_R1_001_(paired)_trimmed_(paired)_contig_2863	9.65	41.45	0.08	0.22	0.21	0.46	0.48
C937576	13.45	11.88	1.6	1.35	1.53	2.08	2.68
TR67816|c0_g1_i2	26.08	23.62	5.73	3.95	5.1	3.58	6.08
TR67816|c0_g1_i4	22.18	19.5	5.39	2.29	4.31	2.9	4.88
TR71319|c0_g2_i2	5.07	4.13	1.1	1.19	1.4	1.66	0.92
Mj_1_GCCAAT_L005_R1_001_(paired)_trimmed_(paired)_contig_24832	14.42	16.29	1.03	2.9	4.52	0.44	1.02
TR52066|c0_g1_i3	4.75	6.35	0.56	1	2.6	0.35	0
TR74958|c0_g1_i1	143.01	105.14	25.8	13.89	22.91	14.9	21.36
C953310	14.67	14.53	11.01	11.93	10.38	9.5	11.51
Mj_1_GCCAAT_L005_R1_001_(paired)_trimmed_(paired)_contig_547	55.3	36.69	11.2	6.91	9.76	1.96	21.85
TR66065|c1_g2_i1	26.87	22.89	7.84	3.72	6.67	1.3	10.56
TR54026|c0_g1_i2	27.46	37.46	14.57	6.95	13.54	8.04	14.73
TR54026|c0_g1_i3	10.59	14.07	6	3.42	6.43	4.13	6.95
TR70419|c0_g1_i7	5.54	3.81	0.97	1.82	1.05	1.21	2.89
Mj_1_GCCAAT_L005_R1_001_(paired)_trimmed_(paired)_contig_467	76.55	286.38	10.56	8.54	11.76	4.57	28.03
TR49492|c0_g1_i1	82.44	280.47	6.67	7.24	12.15	4.7	27.75
Mj_1_GCCAAT_L005_R1_001_(paired)_trimmed_(paired)_contig_13101	10.54	11.54	2.15	3.81	3.6	3.69	4.34
TR60483|c0_g1_i2	12.08	13	2.87	5.15	4.3	5.96	5.88
TR60483|c1_g1_i1	12.21	13.84	3.49	2.93	3.23	3.93	5.61
TR60483|c1_g1_i2	11.45	10.84	2.55	3.45	3.4	4.42	5.17
TR63705|c0_g1_i1	29.55	24.61	4.17	2.11	3.19	2.66	9.18
TR74840|c2_g1_i1	12.38	8.91	2.25	2.81	3.2	3.86	4.3
TR74840|c2_g1_i3	5.47	3.6	1.85	2.17	1.61	1.52	2.16
TR67242|c0_g2_i1	5.74	3.58	5.52	4.48	5.32	5.22	6.59
TR74417|c0_g3_i2	6.97	6.34	8.13	8.18	7.99	7.5	7.97
TR57660|c0_g1_i1	8.53	11.5	17.81	18.9	22.53	17.38	20.44
scaffold13824	7.46	6.46	11.74	12.08	14.15	12.97	15.3
TR60686|c0_g1_i2	14.43	45.3	10.74	3.97	2.46	2.43	7.32
TR76518|c0_g1_i6	3.16	5.15	2.92	0.29	0.39	0.42	1.42
TR72366|c2_g1_i3	5.67	4.91	14.1	15.37	10.4	12.4	16.08
TR76026|c2_g1_i1	41.32	46.04	13.87	21.96	20.38	28.1	22.96
scaffold12874	43.24	46.78	16.56	24.16	19.94	25.96	24.63
Mj_1_GCCAAT_L005_R1_001_(paired)_trimmed_(paired)_contig_2195	20.04	13.5	5.26	1.67	4.24	2.42	4.54
TR62465|c0_g1_i1	26.83	17.8	7.16	3.54	5.5	2.34	5.5
TR48218|c0_g2_i2	8.37	7.99	5.32	1.9	1.59	0.59	3.41
TR45890|c0_g1_i1	17.88	31.9	4.09	5.89	4.43	1.64	3.42
TR67424|c0_g1_i2	13.95	24.65	3.94	4.1	2.61	1.51	2.8
TR75848|c1_g1_i13	4.35	7.33	1.18	0.64	1.01	0.9	1.46
Mj_1_GCCAAT_L005_R1_001_(paired)_trimmed_(paired)_contig_8296	5.02	3.31	0.7	0	0	0.13	2.48
TR68720|c0_g2_i2	5.69	4.19	0.71	0	0.15	0	2.76
TR68896|c0_g4_i2	5.92	5.28	0.88	0	0	0.08	1.92
TR68896|c0_g4_i3	5.91	3.05	0.79	0	0	0	3
TR75283|c0_g2_i6	2.18	3.07	6.71	6.12	5.53	9.3	6.6
Mj_1_GCCAAT_L005_R1_001_(paired)_trimmed_(paired)_contig_1170	31.77	37.54	8.13	6.1	4.78	5.27	7.13
TR65228|c2_g1_i1	66.91	81.64	15.7	11.04	11.29	9.94	14.16
scaffold10921	39.63	48.77	9.72	7.8	5.15	4.61	6.92
TR76248|c0_g4_i7	3.71	2.44	4.26	4.64	5.7	5.02	4.19
Mj_1_GCCAAT_L005_R1_001_(paired)_trimmed_(paired)_contig_12229	2.99	4.36	6.87	4.87	6.05	7.13	7
TR73798|c0_g1_i3	3.74	4.45	6.33	6.75	5.44	7.34	6.82
TR73798|c0_g1_i6	4.64	4.01	6.1	6.81	6.42	7.79	6.31
Mj_1_GCCAAT_L005_R1_001_(paired)_trimmed_(paired)_contig_14762	11.52	18.37	52.66	73.94	60.56	30.8	31.58
TR56278|c0_g1_i1	9.57	13.69	32.85	53.19	40.97	24.51	24.78
TR56725|c0_g1_i1	12.23	18.27	54.48	79.03	67.08	34.93	30.72
Mj_1_GCCAAT_L005_R1_001_(paired)_trimmed_(paired)_contig_3546	11.52	7.58	6.38	3.08	3.3	2.18	4.43
TR69213|c0_g1_i1	6.89	3.92	19.47	13.86	18.54	11.29	18.38
TR55680|c1_g1_i1	71.79	56.15	16.65	23.74	29.56	27.43	20.4
TR55680|c1_g1_i2	43.61	38.64	10.7	10.37	12.96	12.78	12.33
TR52754|c0_g1_i1	700.01	922.62	341.3	80.37	145.23	69.78	471.39
TR67321|c1_g1_i1	11.5	13.47	21.84	19.04	21.8	24.99	19.22
Mj_1_GCCAAT_L005_R1_001_(paired)_trimmed_(paired)_contig_6123	27.71	35.81	16.72	17.48	12.87	13.63	21.93
TR58659|c0_g1_i1	28.01	31.34	19.88	19.16	15.22	15.3	22.67
TR63518|c2_g3_i1	5.4	5.62	3.61	2.15	3.31	3.28	3.76
TR58081|c0_g1_i1	15.83	15.91	6.12	6.75	8.64	5.97	9.71
TR58081|c0_g1_i2	18.39	15.72	7.95	7.12	7.33	7.43	8.76
TR58081|c0_g1_i4	21.02	21.35	8.37	8.58	8.91	8.1	12.12
C943482	3.74	3.43	6.69	7.12	6.04	6.14	7.81
TR70683|c1_g1_i2	2.19	2.85	4.68	4.56	5.11	4.59	3.98
Mj_1_GCCAAT_L005_R1_001_(paired)_trimmed_(paired)_contig_8607	30.44	23.98	10.54	6.65	7.46	4.21	7.76
TR59058|c0_g1_i1	33.87	29.58	14.57	7.61	7.85	5.14	10.04
scaffold10455	21.27	18.44	9.11	6.63	3.91	4.86	6.43
Mj_1_GCCAAT_L005_R1_001_(paired)_trimmed_(paired)_contig_15645	5.54	3.84	7.4	8	7.28	9.91	7.47
TR60462|c0_g1_i1	8.62	6.91	12.51	16.11	14.8	16.77	15.5
scaffold12812	7.03	3.63	8.14	9.46	9.17	9.3	8.13
Mj_1_GCCAAT_L005_R1_001_(paired)_trimmed_(paired)_contig_3340	49.03	35.77	8.02	6.04	8.24	9.03	7.11
TR68757|c1_g1_i1	74.65	53.85	11.68	8.91	11.08	12.1	11.71
scaffold13444	48.2	32.44	7.36	5.65	6.43	7.14	7.32
Mj_1_GCCAAT_L005_R1_001_(paired)_trimmed_(paired)_contig_3443	21.76	16.34	7.32	7.39	4.9	8.62	4.93
Mj_1_GCCAAT_L005_R1_001_(paired)_trimmed_(paired)_contig_1997	26.03	39.38	5.23	0	0	0.87	2.15
TR74591|c1_g1_i3	4.29	3.74	5.4	4.66	4.85	5.18	4.94
Mj_1_GCCAAT_L005_R1_001_(paired)_trimmed_(paired)_contig_1245	30.29	28.56	13.68	16.86	19.47	18.47	18.16
TR49570|c0_g1_i3	39.23	38.5	19.08	20.35	24.53	24.43	22.99
scaffold13277	26.88	26.53	12.46	14.99	17.38	16.84	15.54
TR70335|c0_g1_i2	9.14	5.62	8.62	10.51	10.26	11.02	8.77
Mj_1_GCCAAT_L005_R1_001_(paired)_trimmed_(paired)_contig_11459	2.73	7.41	0.08	0	0	0.07	0.79
Mj_1_GCCAAT_L005_R1_001_(paired)_trimmed_(paired)_contig_4992	22.85	40.84	21.13	9.86	15.7	12.99	21.73
TR56396|c0_g1_i1	25.46	44.94	19.12	12.18	15.26	12.55	21.62
TR72914|c0_g1_i4	18.97	33.88	11.25	6.54	9.78	7.34	7.55
scaffold11318	11.98	24.61	7.44	4.18	4.43	5.12	5.43
TR73471|c0_g2_i4	3.53	7.39	4.62	1.92	1.21	1.46	4.18
TR73491|c1_g1_i1	6.85	14.32	8.66	2.16	2.98	1.83	7.55
Mj_1_GCCAAT_L005_R1_001_(paired)_trimmed_(paired)_contig_9199	10.52	18.82	5.23	4.89	5.52	1.04	10.78
Mj_1_GCCAAT_L005_R1_001_(paired)_trimmed_(paired)_contig_6307	32.24	29.7	12.49	6.74	6.56	2.83	14.92
TR73974|c0_g1_i3	36.02	33.43	13.42	5.19	4.33	2.17	16.09
TR75227|c0_g2_i10	18.7	18.46	7.7	3.2	4.49	1.68	9.95
TR75227|c0_g2_i7	18.38	18.13	8.67	3.1	3.85	1.67	9.23
TR64911|c0_g1_i3	4.2	4.25	9.37	9.89	11.95	8.29	8.64
TR69733|c1_g1_i1	4.54	2.99	6.65	4.81	5.88	6.64	6.8
TR69733|c1_g1_i5	3.7	2.9	5.48	6.09	5.8	4.86	5.13
Mj_1_GCCAAT_L005_R1_001_(paired)_trimmed_(paired)_contig_7739	20.66	15.39	8.6	2.97	2.8	3.23	5.14
TR64838|c0_g1_i2	31.6	21.84	10.25	5.36	6.84	5.15	7.17
TR64838|c0_g1_i3	20.56	15.09	8.3	3.94	4.35	2.69	5.3
TR64838|c0_g1_i4	20.81	15.22	7.88	4.8	4.93	3.13	5.75
TR65596|c0_g1_i6	18.49	14.13	6.23	3.5	3.41	2.61	4.35
Mj_1_GCCAAT_L005_R1_001_(paired)_trimmed_(paired)_contig_4919	10.24	11.67	4.36	3.97	3.33	4.91	3.35
TR75933|c1_g1_i2	10.42	11.82	4.48	2.89	3.14	4.67	3.7
TR76012|c0_g1_i2	12.58	13.76	6.05	4.21	3.16	6.12	4.55
TR60165|c0_g1_i2	8.78	6.91	3.73	4.63	4.26	3.31	4.5
TR61170|c0_g1_i1	8.45	7.54	2.62	4.69	4.23	3.65	4.59
TR61170|c0_g1_i2	11.13	7.53	2.5	4.73	4.08	3.69	2.69
Mj_1_GCCAAT_L005_R1_001_(paired)_trimmed_(paired)_contig_13952	14.81	17.62	9.46	6.56	4.51	5.92	6.97
TR42445|c0_g1_i1	22.41	24.2	11.29	11.97	7.26	8.31	8.55
TR52027|c0_g1_i1	22.92	16.54	31.86	34.65	33.46	33.98	31.69
Mj_1_GCCAAT_L005_R1_001_(paired)_trimmed_(paired)_contig_5750	30.24	46.09	18.61	21.43	23.24	18.52	35.56
TR74616|c1_g1_i4	11.32	9.5	5.65	2.18	5.12	4.37	6.08
TR78473|c2_g1_i1	10.07	16.55	8.64	2	2.86	2.8	4.44
TR78473|c2_g1_i2	8.7	15.01	7.46	2.07	1.71	2.9	2.41
TR78473|c2_g1_i3	6.79	14.2	6.6	2.02	2.46	2.47	2.87
Mj_1_GCCAAT_L005_R1_001_(paired)_trimmed_(paired)_contig_46808	0.55	5.73	0.43	0.29	0	0	0.72
Mj_1_GCCAAT_L005_R1_001_(paired)_trimmed_(paired)_contig_10076	11.13	16.94	3.61	7.11	8.54	6.54	6.49
TR71233|c0_g1_i1	9.62	9.4	3.46	2.77	3.91	3.65	5.94
TR50970|c0_g1_i1	19.42	30.76	2.54	7.62	8.44	3.47	14.55
TR54115|c0_g1_i1	8.14	17.24	0.56	4	4.13	2.4	6.5
Mj_1_GCCAAT_L005_R1_001_(paired)_trimmed_(paired)_contig_16459	8.96	6.25	3.42	5.11	5.44	3.58	4.43
TR72133|c1_g1_i4	6.56	5.63	4.87	3.87	3.77	3.55	4.44
TR58900|c0_g1_i1	216.36	425.77	280.56	170.08	136.24	140.56	175.32
scaffold10806	22.46	26.19	38.67	39.53	27.15	42.11	35.28
TR54831|c0_g1_i1	319.54	570.32	164.14	64.26	68.99	62.9	141.83
scaffold1219	918.05	1775.79	392.95	85.34	131.89	97.25	349.68
TR66809|c0_g3_i1	6.32	3.52	1.4	1.14	3.75	1.19	2
TR66809|c0_g3_i6	6.49	5.18	2.36	2.73	4.58	2.23	2.54
TR67238|c0_g1_i1	23.66	16.74	6.47	3.81	6.43	4.71	7.96
TR52759|c0_g1_i1	13.85	10.38	17.83	13.6	17.67	16.4	15.93
TR52778|c0_g1_i1	9.22	5.94	11.35	10.83	12.99	11.8	9.7
scaffold12138	10.78	6.97	12.74	10.83	12.99	12.63	10.37
Mj_1_GCCAAT_L005_R1_001_(paired)_trimmed_(paired)_contig_10669	9.17	4.74	3.18	0.43	0.4	1.13	1.47
TR61214|c0_g1_i2	17.92	12.93	5.32	0.93	1.53	1.13	4.88
TR61214|c0_g1_i3	14.47	9.99	3.51	1.01	0.95	0.94	1.89
TR51848|c1_g2_i2	12.2	7.66	3.14	2.11	0.57	1.27	5.45
Mj_1_GCCAAT_L005_R1_001_(paired)_trimmed_(paired)_contig_8368	11.67	12.97	9.07	5.91	10.07	8.25	8.72
TR79316|c3_g2_i3	4.77	6.18	2.74	1.06	1.5	0.37	3.46
TR79316|c3_g2_i6	3.75	5.42	3.21	0.85	1.76	0.76	2.94
TR79316|c3_g2_i9	5.1	7.69	3.63	0.94	1.42	0.53	2.93
Mj_1_GCCAAT_L005_R1_001_(paired)_trimmed_(paired)_contig_4894	20.55	68.15	4.96	0.49	0.23	0.57	7.52
TR65667|c3_g1_i1	19.99	61.85	5.65	0.2	0.31	0.37	6.43
TR65667|c3_g1_i2	18.98	58.42	4.86	0.26	0.5	0.65	6
TR65667|c3_g1_i3	20.19	66.25	4.98	0.48	0.19	0.67	6.9
TR65667|c3_g1_i4	17.29	55.15	4.18	0.24	0.22	0.42	6.35
Mj_1_GCCAAT_L005_R1_001_(paired)_trimmed_(paired)_contig_11347	8.68	7.54	4.98	0.99	0.67	0.55	2.25
Mj_1_GCCAAT_L005_R1_001_(paired)_trimmed_(paired)_contig_1152	23.77	25.54	5.33	4.41	5.02	5.73	6.87
TR73776|c0_g10_i1	25.99	26.65	5.35	4.2	5.52	5.45	7.25
TR73776|c0_g10_i2	24.78	24.87	5.03	4.83	5.85	7.13	7.06
TR57689|c0_g1_i1	71.21	64.54	17.26	22.94	14.98	22.1	27.28
Mj_1_GCCAAT_L005_R1_001_(paired)_trimmed_(paired)_contig_8433	5.9	4.99	7.79	7.94	8.47	7.6	7.52
TR74959|c0_g1_i2	12.2	11.56	17.81	18.04	12.95	17.77	17.41
TR74959|c0_g1_i4	11.45	12.67	16.29	16.91	12.14	16.35	17.26
scaffold14305	12.08	10.33	15.37	15.31	11.71	14.74	14.94
TR69583|c1_g1_i1	270.94	540.34	49.21	13.97	45.21	8.83	129.83
scaffold10980	171.57	343.03	30.14	10.51	26.64	4.87	84.5
Mj_1_GCCAAT_L005_R1_001_(paired)_trimmed_(paired)_contig_11329	13.9	8.08	0.36	0.48	2.03	0.17	6.26
TR76653|c0_g1_i1	101.23	50.93	0.92	3.24	7.21	0.7	39.96
TR76653|c0_g1_i2	70.52	35.49	0.81	2.2	6.7	0.42	27.25
Mj_1_GCCAAT_L005_R1_001_(paired)_trimmed_(paired)_contig_25832	10.22	8.97	6.77	4.38	4.44	4.95	6.71
TR79847|c3_g9_i3	47.36	77.5	25.55	15.88	16.73	3.27	41.39
TR59837|c0_g1_i1	19.21	45.97	8.11	5.57	8.14	4.03	9.54
TR59837|c0_g1_i2	12.08	24.82	5.37	5.6	5.13	2.54	3.85
TR69055|c0_g1_i4	7.93	8.04	3.66	3.54	6.68	4.63	3.44
TR72779|c0_g1_i8	5.11	3.69	2.35	1.58	1.87	3.6	2.58
scaffold10533	5.28	5.41	2.75	1.61	3.95	3.61	2.3
TR68913|c1_g1_i1	4.13	4.58	7.29	11.19	11.36	7.5	8.38
TR68913|c1_g1_i2	3.26	5.39	6.93	10.98	9.19	9.25	8.04
TR75319|c0_g1_i1	12.58	11.19	7.25	7.23	7.21	4.3	4.99
TR76625|c3_g1_i1	18.04	10.62	7.95	5.96	7.43	1.88	3.16
TR62413|c0_g1_i1	33.17	21.62	4.14	2.9	7.09	5.22	7.73
TR62413|c0_g1_i2	50.26	34.29	6.08	5.16	8.32	5.86	12.93
TR55472|c0_g1_i2	16.39	2.85	22.81	20.58	22.95	21.18	12.64
Mj_1_GCCAAT_L005_R1_001_(paired)_trimmed_(paired)_contig_9037	9.63	2.68	6.14	11.48	9.61	9.81	8.58
TR62188|c0_g2_i3	13.25	5.99	12.52	12.77	19.14	14.43	12.89
C910467	8.7	3.39	11.85	8.59	15.76	15.3	10.69
TR57233|c0_g1_i3	4.3	5.25	1.77	0.32	0.3	0.22	1.68
TR57755|c0_g1_i5	9.38	5.76	2.97	0.32	0.91	1.46	2.09
TR63097|c0_g1_i6	4	1.74	5.36	7.05	6.78	5.99	4.04
TR64370|c0_g2_i6	4.07	2.71	6.43	5.6	6.62	5.73	5.13
TR59547|c1_g1_i1	8.69	13.24	3.26	3.52	4.39	3.52	2.89
TR59547|c1_g1_i3	8.51	14.25	3.89	5.15	5.6	2.43	2.43
TR59547|c1_g1_i4	8.01	13.51	2.78	1.96	4.31	2.63	2.64
Mj_1_GCCAAT_L005_R1_001_(paired)_trimmed_(paired)_contig_15031	8.3	8.89	4.29	3.74	3.76	3.29	5.14
TR71004|c0_g2_i1	11.17	8.76	3.19	0.91	1.73	1.37	3.16
TR71108|c2_g1_i1	8.32	7.97	3.18	1.41	1.41	1.35	3.27
TR66443|c4_g3_i3	17.21	3.33	14.81	15.71	22.55	11.29	11.65
Mj_1_GCCAAT_L005_R1_001_(paired)_trimmed_(paired)_contig_13306	10.34	14.53	4.92	2.49	2.66	1.28	4.74
TR67409|c0_g1_i1	15.21	19.5	8.93	2.19	3.92	2.04	5.92
TR47983|c0_g1_i1	58.06	78.96	7.03	6.63	14.73	4.14	17.81
Mj_1_GCCAAT_L005_R1_001_(paired)_trimmed_(paired)_contig_9742	29.24	85.19	17.73	7.05	9.67	3.86	29.04
TR70518|c0_g1_i1	58.72	50.77	27.27	19.81	25.64	5.55	5.6
TR59397|c0_g1_i1	6.36	7.63	1.22	0.22	0.1	0.23	0.89
TR59397|c0_g1_i6	6.19	7.63	1.59	0.2	0	0.14	1.09
TR59397|c0_g1_i7	7.42	8.58	1.42	0	0.77	0.19	0.85
TR76028|c1_g1_i10	5.44	7.07	1.09	0	0	0	0.79
TR76028|c1_g1_i7	4.59	6.78	0.95	0.1	0.09	0.07	0.49
TR56478|c0_g1_i1	18.84	15.5	4.36	0	0.17	0.5	1.99
TR56478|c0_g1_i2	31.31	21.44	4.57	0	0	0.26	2.67
TR66532|c0_g1_i1	27.71	22.41	11.15	6.98	4.93	5.55	14.86
TR52018|c0_g1_i1	570.03	532.29	144.26	49.5	64.86	31.57	117.87
TR58700|c0_g1_i2	16.27	17.27	43.04	38.47	42.6	43.22	36.09
TR59124|c1_g1_i4	5.88	8.73	16.06	13.94	15.9	20.06	14.46
TR59124|c1_g1_i5	6.04	6.58	12.32	12.35	12.94	14.89	11.29
TR54629|c0_g1_i1	29.83	46.59	25.08	14.89	24.59	12.69	27.17
TR74236|c1_g1_i10	4.93	6.18	10.35	8.62	11.15	9.74	8.7
TR74236|c1_g1_i7	2.73	3.05	5.1	4.98	5.54	4.65	4.44
TR52060|c0_g1_i2	25.81	32.06	1.7	0.19	0.18	0.53	2.61
TR52060|c0_g1_i3	23.45	34.68	3.43	0	0.77	0	2.36
TR52060|c0_g1_i4	20.26	30.22	2.44	0.47	0.22	0.16	2.63
TR65069|c0_g1_i1	12.98	22.9	7.39	0.56	0.42	0.31	4.55
TR50777|c0_g1_i1	4.19	5.58	0	0	0	0	0.59
TR50777|c0_g1_i3	10.94	13.61	0	0	0	0	1.37
Mj_1_GCCAAT_L005_R1_001_(paired)_trimmed_(paired)_contig_13163	9.89	23.38	10.38	0.36	1.14	1.36	0.08
TR66936|c0_g1_i2	8.25	25.64	5.85	0.38	1.2	2.41	0.24
TR66936|c0_g1_i3	17.94	49.35	19.67	1.01	1.52	3.73	0.52
scaffold1092	10.1	31.89	10.18	0.87	1.34	2.91	0.2
TR72173|c0_g3_i5	6.72	7.39	9.76	11.29	9	10.61	10.79
TR68373|c0_g2_i9	5.12	4.71	0.93	0.31	0.29	0	0.97
TR68373|c1_g1_i5	5.08	5.58	1.12	0.27	0.39	0	1.62
TR68373|c1_g1_i8	6.72	6.55	1.02	0.25	0.71	0.09	3.52
TR46954|c1_g1_i1	112.42	101.85	217.95	240.39	162.37	225.36	182.61
TR46954|c1_g1_i2	55.84	63.08	117.37	127.05	91.64	126.66	98.98
TR53387|c0_g1_i2	89.87	97.63	226.23	217.66	174.49	221.45	162.41
scaffold13991	60.98	62.41	108.08	138.42	83.8	132.71	99.29
TR74234|c1_g3_i4	1.84	1.76	7.37	8.46	5.5	4.9	4.72
TR66361|c0_g1_i1	23.55	15.78	45.9	37.76	42.59	37.68	34.09
TR76554|c3_g1_i4	6.12	7.99	1.09	3.82	2.77	4.52	1.46
TR79412|c0_g1_i9	9.22	5.92	1.69	1.08	1.2	1.52	2.53
TR66873|c0_g1_i2	3.97	15.89	4.77	0	0	0.09	3.04
TR66873|c0_g1_i4	2.25	6.18	2.34	0	0	0	1.62
TR66873|c0_g1_i5	1.71	7.04	2.01	0	0	0	1.97
TR68431|c0_g1_i1	3.04	12.14	2.95	0	0	0.08	3.08
TR68431|c0_g1_i3	1.73	9.6	3.14	0	0	0	2.63
Mj_1_GCCAAT_L005_R1_001_(paired)_trimmed_(paired)_contig_13855	10.62	6.95	19.39	23.79	16.2	16.02	16.24
TR67358|c0_g1_i1	8.32	5.52	15	14.39	12.17	9.47	12.6
Mj_1_GCCAAT_L005_R1_001_(paired)_trimmed_(paired)_contig_4716	4.2	3.76	10.21	9.72	7.06	6.79	6.87
TR69503|c0_g1_i4	5.43	3.95	10.95	9.67	11.19	7.69	9.82
TR58754|c0_g1_i1	17.24	14.68	29.48	30.34	36.85	31.68	27.43
Mj_1_GCCAAT_L005_R1_001_(paired)_trimmed_(paired)_contig_36147	0.78	0.99	5.03	7	6.79	8.78	5.49
TR76631|c0_g1_i2	56.33	44.5	83.54	81.06	72.62	66.09	73.87
TR70927|c0_g2_i1	7.55	11.09	1.52	1.17	4.67	0.2	7.26
TR60296|c2_g1_i3	6.28	5.78	0.95	0.75	1.62	0.08	3.47
TR60296|c2_g1_i4	5.17	5.48	1.22	0.18	0.69	0	2.27
scaffold10739	6.58	6.47	0.52	0.88	1.25	0	2.95
Mj_1_GCCAAT_L005_R1_001_(paired)_trimmed_(paired)_contig_4731	15.66	13.5	8.99	6.99	8.15	9.03	8.93
TR65143|c0_g2_i2	23.13	23.83	10.45	11.22	11.76	12.79	9.96
Mj_1_GCCAAT_L005_R1_001_(paired)_trimmed_(paired)_contig_36027	1.58	7.85	0.37	1	0.47	0.53	0.93
TR65017|c0_g1_i1	6.18	15.64	1.69	2.51	1.5	1.76	1.42
TR62198|c0_g1_i3	33.48	40.05	11.87	4.37	3.23	12.55	10.72
TR62507|c0_g1_i2	47.66	53.08	18.31	7.12	3.4	15.71	13.1
scaffold11519	24.6	30.6	11.06	3.81	2.57	10.78	8.11
scaffold11520	29.9	35.84	11.35	5.52	2.19	11.14	10.07
Mj_1_GCCAAT_L005_R1_001_(paired)_trimmed_(paired)_contig_3016	8.35	7.13	3.05	3.05	3.88	1.71	4.74
TR70300|c1_g2_i2	8.6	7.9	2.79	3.07	5.23	2.64	5.57
TR70300|c1_g2_i4	6.8	7.26	3.69	2.75	3.93	2.28	5.07
TR70300|c1_g2_i5	7.34	9.38	3.55	3.96	4.71	3.79	5.69
TR74574|c0_g1_i2	7.04	7.23	4.06	2.97	4.14	2.76	5.07
TR74574|c0_g1_i3	5.46	5.27	2.11	2.73	3.06	2.09	3.55
TR74574|c0_g1_i4	5.23	5.13	2.2	2.3	2.81	1.95	3.19
C950376	33.8	30.2	4.29	1.2	1.69	0.42	7.31
TR65034|c0_g1_i2	12.71	32.06	2.33	1.91	2.71	3.25	1.61
TR68721|c1_g1_i1	32.41	25.19	37.61	44.27	32.47	31.06	39.23
TR75962|c0_g1_i1	38.88	35.71	13.39	13.87	15.34	12.58	15.27
TR66095|c2_g1_i3	3.48	1.48	5.24	3.68	5.48	5.14	3.62
TR67475|c0_g2_i1	12.5	11.21	20.23	17.32	18.64	20.76	16.54
Mj_1_GCCAAT_L005_R1_001_(paired)_trimmed_(paired)_contig_17851	1.85	3.27	6.53	6.72	4.49	3.33	3.3
TR72744|c0_g1_i5	4.01	3.98	7.63	7.83	6.23	5.48	4.87
Mj_1_GCCAAT_L005_R1_001_(paired)_trimmed_(paired)_contig_1337	128.42	194.3	56.11	43.49	54.56	38.53	77.93
Mj_1_GCCAAT_L005_R1_001_(paired)_trimmed_(paired)_contig_4363	49.38	77.08	11.78	9.05	12.6	10.78	25.56
TR79599|c1_g2_i1	29.02	41.34	6.72	2.32	4.55	2.43	10.18
TR79634|c1_g6_i2	30	52.37	5.86	4.02	5.13	2.65	13.35
Mj_1_GCCAAT_L005_R1_001_(paired)_trimmed_(paired)_contig_23255	8.66	7	1.29	1.22	1.97	0.12	2.27
TR67336|c0_g1_i1	5.86	4.81	1.78	0.32	0.45	0.56	1.9
TR67336|c0_g1_i3	8.51	6.47	1.19	0.32	1.22	0.68	3.4
TR75987|c1_g1_i1	25.38	27.01	2.53	0	0	0.07	2.25
TR62550|c0_g2_i3	4.41	2.26	4.96	6.57	5.9	5.57	5.61
Mj_1_GCCAAT_L005_R1_001_(paired)_trimmed_(paired)_contig_390	20.16	18.43	5.74	2.77	3.99	1.91	6.51
TR78685|c0_g2_i3	23.76	20.23	8.18	3.36	3.54	2.45	8.4
Mj_1_GCCAAT_L005_R1_001_(paired)_trimmed_(paired)_contig_19079	6.77	4.97	3.19	0.36	0.34	0.75	1.78
TR68639|c2_g4_i3	4.73	4.91	6.83	7.42	7.1	5.51	6.37
TR79864|c0_g1_i1	10.27	8.08	5.73	5.26	5.6	6.65	7.98
TR77326|c1_g1_i3	5.72	6.58	1.62	0.36	0.68	0	1.58
TR77417|c0_g1_i2	32.07	39.08	6.18	0.13	0.13	0.66	12.12
TR77575|c0_g1_i6	17.83	12.46	9.52	0.1	0.3	0.15	0.98
TR77575|c0_g1_i8	7.94	6.09	1.56	0.42	0	0	0.26
Mj_1_GCCAAT_L005_R1_001_(paired)_trimmed_(paired)_contig_3805	34.39	27.33	45.92	57.46	45.1	56.02	39.31
TR69330|c0_g1_i1	13.59	17.59	20.3	22.56	19.56	24.27	23.01
TR75779|c3_g1_i1	24.32	22.24	8.25	5.59	4.53	3.67	6.5
TR75779|c3_g1_i2	7.39	7.16	2.04	2.75	1.56	1.16	1.94
TR59304|c0_g1_i3	3.95	3.5	7.41	10.67	10.16	9.41	9.13
TR62867|c0_g1_i4	3.43	2.52	6.12	7.49	5.88	6.99	5.42
Mj_1_GCCAAT_L005_R1_001_(paired)_trimmed_(paired)_contig_17728	6.34	11.61	1.79	0.2	0.95	0.56	1.13
TR72251|c0_g1_i10	7	11.51	2.17	2.87	2.71	2.38	1.66
TR56883|c2_g1_i3	3.78	5.98	6.36	9.63	7.13	6.98	8.97
Mj_1_GCCAAT_L005_R1_001_(paired)_trimmed_(paired)_contig_45328	3.2	9.91	0.22	0.9	0.56	1.46	0.56
scaffold13865	13.73	9.79	20.91	23.28	18.49	19.89	15.03
Mj_1_GCCAAT_L005_R1_001_(paired)_trimmed_(paired)_contig_7397	3.78	1.93	4.56	7.64	6.55	6.05	6.7
TR58958|c0_g1_i1	5.95	1.94	7.56	10.77	12.52	11.37	9.27
TR65292|c0_g1_i2	8.3	8.45	13.76	10.68	12.38	12.11	14.96
Mj_1_GCCAAT_L005_R1_001_(paired)_trimmed_(paired)_contig_247	82.59	108.19	39.15	34.18	31.62	24.61	40.14
TR63114|c0_g1_i1	81.85	114.68	40.99	37.83	34.84	28.82	36.62
TR57613|c0_g1_i1	80.81	94.19	13.36	17.14	17.25	20.66	29.85
TR69789|c8_g1_i1	3.81	3.14	4.31	5.26	4.74	4.99	4.27
TR60946|c0_g1_i1	28.71	26.15	7.81	10.71	13.73	14.59	9.48
TR60980|c0_g1_i2	29.69	23.48	39.13	37.13	38.74	35.61	34.24
TR78583|c1_g3_i1	10.5	8.24	4.95	3	3.72	3.76	7.2
TR78583|c1_g3_i6	10.91	9.69	3.56	1.75	1.79	0.61	2.9
Mj_1_GCCAAT_L005_R1_001_(paired)_trimmed_(paired)_contig_3010	6.48	5.74	1.6	0.96	2.38	0.5	3.8
TR66279|c0_g1_i2	8.56	9.41	3.58	2.12	4.1	1.06	4.64
TR66279|c0_g1_i3	9.91	9.18	3.65	2.47	2.84	0.53	5.33
TR68758|c0_g1_i5	5.62	5.07	2.02	2.73	3.5	1.21	2.77
Mj_1_GCCAAT_L005_R1_001_(paired)_trimmed_(paired)_contig_2463	215.8	139.18	29.54	5.38	8.14	5.02	25.58
TR71433|c1_g2_i1	18.8	14.67	4.41	1.8	3.13	0.48	4.21
TR66245|c0_g1_i1	70.28	52.35	39.11	29.85	25.44	24.77	25.45
TR69691|c0_g2_i1	19.67	28.19	14.15	9.71	8.47	4.26	13.22
TR75768|c0_g1_i1	4.68	3.7	5.02	5.09	5.48	5.51	5.24
Mj_1_GCCAAT_L005_R1_001_(paired)_trimmed_(paired)_contig_2222	4.9	5.84	0.72	0.19	0.73	0.14	1.21
TR68064|c0_g1_i10	4.96	8.53	1.12	0.3	0.38	0.35	0.69
TR68542|c1_g2_i1	10.48	5.77	0.76	0.91	1.71	0.87	1.13
TR68542|c1_g2_i2	8.01	7.79	1.72	1.12	2.72	1.63	1.5
TR68542|c1_g2_i3	5.29	6.09	0.51	0.29	0.37	0.41	0.67
TR68542|c1_g2_i4	8.04	6.62	1.43	0.97	0.91	1.43	1.14
TR68542|c1_g2_i5	5.58	4.05	1.22	1.2	0.57	0.74	0.75
TR58039|c0_g1_i1	6.67	7.52	1.02	0.46	0.43	0.32	0.85
TR61256|c0_g1_i1	6.41	10.27	0.89	0.9	0.56	0	1.3
Mj_1_GCCAAT_L005_R1_001_(paired)_trimmed_(paired)_contig_6624	9.03	10.37	0.52	0.14	0.13	0.49	0.09
TR75237|c0_g4_i1	13.19	15.12	0.69	0.81	0.22	0.73	1.01
TR62116|c0_g1_i1	3.02	2.95	13.62	13.88	12.96	6.54	7.89
Mj_1_GCCAAT_L005_R1_001_(paired)_trimmed_(paired)_contig_12655	13.13	21.37	8.46	11.75	11.05	8.75	12.42
TR71110|c1_g1_i1	4.32	3.48	6.1	7.39	5.16	4.57	6.82
TR71110|c1_g1_i6	2.84	2.71	5.07	6.17	5.94	4.32	5.36
TR71744|c0_g4_i5	7.81	5.89	0.99	0.44	0	0	0.27
TR71744|c1_g3_i7	3.94	6.75	0	0.66	0.62	0	0.2
Mj_1_GCCAAT_L005_R1_001_(paired)_trimmed_(paired)_contig_6177	2.27	1.5	9.36	11.87	9.25	7.13	5.03
Mj_1_GCCAAT_L005_R1_001_(paired)_trimmed_(paired)_contig_10101	100.77	274.45	114.13	0.11	0.1	1.85	90.01
Mj_1_GCCAAT_L005_R1_001_(paired)_trimmed_(paired)_contig_11160	6.75	21.23	5.99	0	0	0.53	5.73
TR62296|c0_g1_i2	10.27	35.09	9.07	0	0	0.2	8.92
Mj_1_GCCAAT_L005_R1_001_(paired)_trimmed_(paired)_contig_4515	22.4	21	5.31	3.55	5.72	3.76	7.26
TR56676|c0_g1_i1	30.93	25.88	6.7	5.66	4.66	3.33	7.74
TR65653|c0_g4_i1	3.86	4.32	6.03	5.48	6.05	5.24	5.97
Mj_1_GCCAAT_L005_R1_001_(paired)_trimmed_(paired)_contig_14249	4.78	0.69	7.6	10.21	7.12	8.45	3.76
TR56839|c0_g1_i1	2.49	0.37	4.51	7.28	4.28	6.78	4.9
TR75696|c1_g2_i1	2.63	4.09	10.53	14.51	6.18	4.46	11.67
scaffold10322	1.54	1.26	13.45	6.6	5.56	8.99	13.62
TR77434|c0_g1_i1	4.64	9.46	3.51	0	0.06	0	4.25
TR77434|c0_g1_i3	4.39	10.43	3.57	0	0	0.04	3.62
Mj_1_GCCAAT_L005_R1_001_(paired)_trimmed_(paired)_contig_6533	8.8	4.97	4.31	0.63	0.66	0.24	1.42
TR73889|c1_g1_i2	29.18	58.18	6.2	10.14	11.81	4.38	13.91
TR56851|c0_g1_i1	176.29	152.13	44.42	27.14	27.29	12.89	38.48
TR76661|c1_g1_i3	10.67	8.35	1.97	0.16	0.15	0.3	3.75
TR76661|c1_g1_i6	6.03	4.75	1.04	0	0.53	0	2.27
scaffold13161	8.56	6.5	1.69	0.2	0.19	0	3.78
TR56299|c0_g1_i1	5.67	3.78	1.74	0	0	0	1.07
TR56299|c1_g1_i1	8.17	5.08	2.48	0	0	0.07	1.5
Mj_1_GCCAAT_L005_R1_001_(paired)_trimmed_(paired)_contig_20009	11.12	30.41	2.62	0.12	0	0.17	5.49
TR67452|c0_g1_i1	11.08	34.3	2.13	0	0	0.16	5.65
TR67452|c0_g1_i2	11.18	28.61	1.58	0	0	0.08	5.45
TR70089|c0_g4_i2	5.81	7.42	3.04	2.04	2.89	1.67	4.45
TR70089|c0_g5_i1	11.12	9.65	4.76	3.44	3.24	2.57	5.13
TR70089|c1_g1_i4	7.72	6.3	2.36	2.23	1.95	3.35	4.25
TR70583|c0_g1_i1	7.69	9.3	4.36	3.08	4.12	6.39	4.06
TR78958|c1_g5_i10	7.69	8.89	3.52	2.22	3.41	3.75	3.22
TR78958|c1_g5_i2	7.54	7.9	3.73	1.23	3.03	4.02	3.04
TR78958|c1_g5_i6	5.91	7.75	2.84	1.65	2.41	2.62	2.38
TR78958|c1_g5_i7	8.11	8.1	3.42	2.44	3.22	4.95	3.43
TR78958|c1_g5_i9	4.82	5.15	3.19	1.76	2.35	2.92	2.32
TR69292|c0_g1_i1	3.9	3.93	7.95	8.35	7.7	7.08	7.25
TR65883|c0_g1_i1	68.61	62.04	30.94	16.28	18.92	12.53	34.14
TR64420|c0_g2_i2	2.83	3.55	8.85	6.35	6.76	7.02	6.79
TR76596|c0_g1_i5	4.11	2.51	6.2	6	4.42	6.02	3.89
TR77699|c3_g1_i1	21.82	22.47	41.97	42.05	28.39	29.03	32.88
Mj_1_GCCAAT_L005_R1_001_(paired)_trimmed_(paired)_contig_9768	23.62	17.84	28.86	33.47	32.39	32.39	39.22
TR76090|c0_g3_i1	32.9	29.75	55.09	55.36	59.1	53.63	62.19
scaffold12675	16.2	14.61	25.06	31	30.03	25.75	29.55
TR60529|c0_g1_i1	51.41	122.66	14.97	2.81	6.56	1.39	10.58
TR62340|c0_g1_i1	55.08	147.83	17.96	4.11	6.56	4.17	12.17
TR62340|c0_g1_i2	49.36	112.98	15.16	3.59	6.48	2.3	11.69
TR68554|c0_g1_i2	20.4	11.96	12.06	2.96	3.73	4.58	3.86
TR46373|c0_g1_i1	182.65	106.58	196.5	204.13	240.13	178.55	186.6
scaffold1325	10.61	5.5	11.01	12.31	11.6	10.86	10.12
TR66143|c0_g1_i6	7.64	5.4	9.46	9.31	8.28	8.66	8.56
TR73408|c0_g1_i1	16.52	12.74	2.62	1.51	4.98	2.29	2.04
TR73408|c0_g1_i2	22.6	16.01	3.47	2.97	4.42	3.06	3.01
TR73408|c1_g1_i9	16.59	12.54	3.01	1.01	4.4	1.42	1.89
Mj_1_GCCAAT_L005_R1_001_(paired)_trimmed_(paired)_contig_4133	111.16	142.71	53.54	26.34	25.1	17.71	33.79
TR79763|c0_g1_i1	119.26	156.81	55.76	23.74	16.79	14.14	32.15
TR73997|c0_g1_i2	5.78	5.33	10.43	12.94	11.46	9.61	8.03
Mj_1_GCCAAT_L005_R1_001_(paired)_trimmed_(paired)_contig_5273	23.82	21.99	3.76	1.01	1.43	1.06	3.62
TR67112|c3_g1_i2	47.61	57.56	9.09	3.1	3.45	2.02	9.01
TR67112|c3_g1_i3	22.3	26.03	5.5	1.35	3.48	1.41	7.53
TR67112|c3_g1_i6	39.79	46.92	9.03	3.05	4.53	1.99	7.65
TR67112|c3_g1_i8	32.59	39.37	6.54	1.56	2.29	1.09	5.92
TR71193|c0_g1_i1	2.6	3.37	8.16	8.81	7.2	3.78	9.42
TR63130|c0_g1_i1	31.54	42.97	9.97	10.86	16.17	8.53	10.14
Mj_1_GCCAAT_L005_R1_001_(paired)_trimmed_(paired)_contig_2392	16.83	35.21	6.14	4.66	11.8	4.48	12.92
TR72271|c0_g1_i1	24.07	56.56	7.76	7.71	11.9	5.52	17.77
scaffold1163	8.79	19.38	2.77	2.96	3.72	2	5.08
TR61632|c0_g3_i2	5.22	4.06	7.94	8.51	8.32	9.44	7.29
TR61696|c0_g1_i3	3.67	3.59	7.22	5.93	5.9	6.79	6.71
TR61696|c0_g1_i6	3.94	4.14	6.16	5.84	5	7.5	6.38
TR78109|c0_g3_i4	5.05	3.42	5.59	3.28	5.73	6.21	5.83
TR71529|c0_g1_i3	8.67	6.43	2.47	1.78	2.07	2.12	2.01
TR71529|c0_g1_i5	5.03	3.3	1.84	1.75	2.26	2.07	1.32
Mj_1_GCCAAT_L005_R1_001_(paired)_trimmed_(paired)_contig_480	8.22	5.12	14.18	15.03	7.7	12.07	11.66
TR61837|c0_g1_i1	52.17	42.87	18.27	18.78	22.75	20.69	12.7
TR51953|c0_g1_i2	0.57	1.44	3.33	5.67	0.84	0.42	0.37
TR78292|c1_g4_i2	8.29	7.66	3.02	4.06	4.69	6.38	2.52
TR78714|c1_g2_i2	6.31	6.4	1.51	1.96	1.53	3.22	2.22
Mj_1_GCCAAT_L005_R1_001_(paired)_trimmed_(paired)_contig_6813	8.68	8.24	1.85	1.72	2.84	2.21	3.27
scaffold11259	5.08	6.18	1.29	1.05	2.34	1.68	2.92
Mj_1_GCCAAT_L005_R1_001_(paired)_trimmed_(paired)_contig_97	23.46	18.79	3.43	2.01	3.19	3.44	4.2
TR79615|c0_g1_i1	27.26	22.97	3.54	2.24	3.27	3.93	4.83
TR79658|c0_g1_i2	10.43	9.38	0.55	0.37	0.35	0.26	1.16
scaffold14308	24.73	21.23	3.45	2.91	3.91	4.14	5.9
TR63385|c0_g1_i3	4.34	9.28	10.77	15	16.25	13.78	10.95
scaffold13556	3.14	7.24	8.17	9.34	11.54	10.59	7.76
TR72583|c0_g3_i1	52.7	74	14.54	4.6	5.66	1.97	20.13
TR72583|c0_g3_i2	38.95	51.2	10.17	4.13	4.48	1.75	14.43
TR72583|c0_g3_i3	46.08	64.96	13.71	5.11	5.87	2.35	17.05
TR72583|c0_g3_i5	37.74	54.4	12.54	4.98	4.84	1.63	13.42
TR70265|c1_g4_i1	12.99	9.43	2.41	1.43	2.18	0.62	2.15
TR70265|c1_g4_i4	11.02	8.83	2.6	0.96	2.24	0.9	1.67
TR70265|c1_g4_i5	9.07	8.94	1.7	1.92	2.41	1.07	2.06
scaffold12957	8.45	7.46	1.65	0.64	1.65	0.84	1.83
Mj_1_GCCAAT_L005_R1_001_(paired)_trimmed_(paired)_contig_4057	12.14	15.79	4.36	3.9	5.52	5.39	9.18
TR78610|c1_g2_i2	16.35	18.99	4.69	5.35	5.52	7.06	10.44
scaffold14382	12.31	15.25	4.39	2.69	4.65	5.51	8.73
TR59537|c0_g1_i1	95.27	117.17	26.02	33.38	48.43	43.66	39.5
Mj_1_GCCAAT_L005_R1_001_(paired)_trimmed_(paired)_contig_43254	3.02	0.86	13.61	19.62	17.47	16.6	13.52
TR69299|c0_g1_i2	33.78	28.1	8.37	6.09	9.36	1.81	11.61
TR74728|c0_g1_i1	30.43	26.25	8.06	6.64	8.54	2.04	9.79
scaffold13490	6.87	5.13	3.63	2.56	4.05	3.01	3.68
TR69893|c0_g1_i2	57.89	39.85	11.34	3.49	4.13	3.16	16.89
TR60818|c1_g1_i1	6.62	6.11	12.33	10.87	13.5	12.74	14.02
TR60279|c0_g1_i5	7.08	7.9	3.31	1.05	1.92	0.88	2.09
TR60279|c0_g1_i7	5.48	5.74	2.07	1.14	1.48	0.61	1.84
TR60279|c1_g1_i1	6.07	8.66	3.02	1.13	1.43	1.11	1.92
TR60279|c1_g1_i4	6.33	7.24	2.43	0.8	1.66	1.08	2.54
TR56888|c0_g1_i2	0.83	6.73	0.28	1.41	1.06	0.86	0.47
TR63283|c0_g1_i1	0.76	9.36	0.06	0.91	0.85	0.32	0.89
TR63283|c0_g1_i3	0.58	14.74	0.21	1.11	1.31	0.39	0.29
Mj_1_GCCAAT_L005_R1_001_(paired)_trimmed_(paired)_contig_6366	7.94	5.7	2.49	2	3.18	3.06	2.03
TR64490|c0_g1_i1	11.55	7.39	2.66	2.59	1.89	1.99	2.6
TR64490|c0_g1_i2	11.34	6.52	2.22	2.69	2.92	2.44	2.8
TR65131|c0_g1_i2	8.19	5.94	2.14	2.41	2.27	1.35	2.39
TR73999|c0_g2_i1	3.66	2.47	4.94	5.5	5.24	5.46	3.61
TR48393|c0_g1_i4	1.6	5.08	0.16	0.42	0.4	1.18	0.53
TR59617|c0_g2_i10	7.47	11.64	1.7	0	0	0.07	1.86
TR59617|c0_g2_i12	5.72	7.53	1.91	0	0.14	0.21	1.88
TR59617|c0_g2_i13	2.65	5.15	1.3	0	0	0.12	0.76
TR59617|c0_g2_i3	4.96	9.01	1.92	0.1	0	0.07	1.61
TR59617|c0_g2_i7	4.61	8.3	1.7	0	0	0	1.07
TR59617|c0_g2_i8	4.15	7.65	1.95	0	0	0.31	1.23
TR59617|c0_g2_i9	5.51	9.16	1.33	0	0	0.07	1.57
TR59787|c0_g1_i10	4.61	8.18	1.71	0.15	0	0	1.67
TR59787|c0_g1_i11	4.88	8.23	1.99	0	0	0.05	1.58
TR59787|c0_g1_i13	6.41	13.13	1.74	0	0.37	0.21	1.4
TR59787|c0_g1_i14	5.39	10.34	1.82	0.24	0.3	0.17	1.09
TR59787|c0_g1_i2	2.62	5.15	1.79	0	0.13	0.09	1.59
TR59787|c0_g1_i3	4.55	8.83	1.64	0	0.07	0.1	1.1
TR59787|c0_g1_i6	2.81	5.11	1.2	0	0.19	0.07	1.01
TR59787|c0_g1_i7	6.76	12.35	1.74	0	0.47	0	2.46
TR59787|c0_g1_i8	6.1	11.77	1.76	0.19	0.09	0.2	1.6
TR59787|c0_g1_i9	4.2	9.34	2.26	0.11	0.11	0.16	1.12
Mj_1_GCCAAT_L005_R1_001_(paired)_trimmed_(paired)_contig_203	722.48	1009.23	199.57	14.98	11.08	17.16	276.74
TR37019|c0_g1_i1	1009.48	1441.2	293.09	18.08	19.32	26.51	398.31
TR79085|c2_g1_i3	5.07	2.91	4.53	6.74	4.83	5.61	5.59
TR70637|c3_g2_i2	3.78	2.86	5.22	5.76	6.67	5.99	6.76
TR66906|c0_g2_i1	17.07	5.55	20.39	21.69	22.06	17.5	11.72
TR71522|c2_g2_i1	7.49	4.16	11.26	12.58	13.84	11.52	10.27
TR71522|c2_g2_i3	5.84	3.66	9.66	10.6	12.33	12.2	8.4
TR59578|c0_g1_i1	21.96	38.75	7.47	5.93	5.92	2.12	9.3
TR59578|c0_g1_i2	33.84	57.26	9.34	5.15	6.68	1.98	13.03
TR79875|c1_g1_i1	46.02	41.84	15.02	4.28	4.82	1.45	10.89
TR67790|c0_g1_i5	9.05	11.01	1.87	0.72	1.36	0.88	2.57
TR68754|c0_g1_i1	7.76	2.41	5.96	6.88	7.61	8.2	6.03
TR51988|c0_g1_i1	146.91	132.03	64.64	12.8	14.05	8.28	60.55
scaffold12713	103.14	95.57	45.81	8.64	10.59	5.44	45.23
TR72966|c0_g1_i6	7.35	11.16	3.16	4.03	6.66	5.34	4.89
TR68738|c0_g1_i1	6.45	3.57	8.91	10.57	12.79	10.06	9.9
TR56002|c0_g1_i3	10.26	6.13	17.03	16.62	15.51	12.92	12.36
Mj_1_GCCAAT_L005_R1_001_(paired)_trimmed_(paired)_contig_11671	3.13	7.62	2.27	0.38	0.72	1.33	4.03
TR73138|c0_g1_i1	7.75	11.16	3.91	1.76	3.01	2.11	4.69
TR73138|c0_g1_i11	4.59	5.8	2.43	1.19	1.69	1.67	2.13
TR73138|c0_g1_i2	4.38	7.34	2.25	1.73	2.41	2.04	3.69
TR74946|c0_g1_i2	2.55	6.42	1.77	1.2	1.73	1.06	1.78
TR74946|c0_g1_i7	4.23	6.51	1.91	0.93	1.96	1.26	2.76
Mj_1_GCCAAT_L005_R1_001_(paired)_trimmed_(paired)_contig_8460	15.11	22.35	11.23	5.21	8.52	6.51	10.4
TR54302|c0_g4_i3	12.71	18.33	10.87	4.14	5.7	6.04	7.4
TR54302|c0_g4_i4	13.67	18.6	6.57	2.75	2.59	3.41	7.02
TR54302|c0_g6_i1	20.94	31.08	14.29	7.48	7.61	7.16	12.22
TR76387|c0_g3_i1	28.64	49.28	18.83	5.35	9.97	8.47	20.15
TR76387|c0_g3_i2	20.48	33.03	17.35	6.22	10.51	11.42	14.2
TR71484|c0_g1_i3	7.58	4.77	1.39	1.63	1.08	0.4	2.28
scaffold11370	5.91	3.66	0.38	0	0.48	0.18	1.58
Mj_1_GCCAAT_L005_R1_001_(paired)_trimmed_(paired)_contig_1040	56.37	81.75	10.19	2.86	7.72	1.82	16.79
TR63488|c0_g1_i1	40.28	64.4	7.32	3.71	5.63	1.48	14.01
TR70412|c0_g1_i5	9.38	5.76	2.25	1.6	4.38	2.69	3.19
Mj_1_GCCAAT_L005_R1_001_(paired)_trimmed_(paired)_contig_12309	2.53	6.52	1.55	0.9	1.55	0.63	2.78
TR69150|c0_g3_i13	3.1	6.19	1.66	0.67	0.84	0.94	2.5
TR69150|c0_g3_i4	4.01	5.61	1.55	1.2	1.04	1.82	3.29
TR69786|c0_g1_i6	2.6	6.11	1.02	1.37	0.86	1.59	2.56
TR75825|c0_g1_i1	3.28	2.42	5.05	6.38	6.37	6.12	5.21
TR79452|c1_g1_i4	10.04	5.19	9.02	7.55	9.12	9.98	10.39
TR71113|c0_g1_i1	7.41	26.88	0.68	0.26	0.49	1.01	1.06
TR71113|c0_g1_i3	7	29.9	0	0	0	0.33	0.06
TR71113|c0_g1_i6	3.64	6.49	1.23	0	0.77	0.29	0.51
TR71113|c0_g2_i2	4.18	16.73	0	0	0	0	0.12
TR71117|c2_g2_i1	9.77	32.67	0	0	0.06	0.37	0.08
TR71117|c2_g2_i2	8.23	32.04	0.05	0	0	0.21	0
TR63850|c0_g1_i2	19.16	11.21	66.31	72.11	63.89	38.63	74.93
TR69375|c0_g1_i2	15.18	9.54	56.89	63.83	48.02	32.2	57.44
Mj_1_GCCAAT_L005_R1_001_(paired)_trimmed_(paired)_contig_2670	5.02	7.22	0.27	0.72	0.68	0.25	3.15
TR57516|c0_g1_i1	9.41	13.77	1.32	1.42	2.35	0.62	3.54
TR57516|c0_g1_i2	6.19	8.12	0.72	0.48	2.59	0.34	2.6
TR57516|c0_g1_i6	6.27	8.46	1.11	0.75	1.42	1.05	2.8
TR57516|c0_g1_i8	8.03	11.15	1.75	1.28	1.55	0	3.06
TR75766|c0_g1_i1	5.08	8.86	2.39	1.87	3.29	2.44	2.78
TR77653|c0_g1_i1	10.75	15.61	4.58	2.08	3.1	2.23	4.62
TR77653|c0_g1_i3	5.82	8.08	1.67	1	1.1	0.82	2.38
TR77653|c0_g1_i4	7.47	10.28	3.01	0.84	1.02	1.51	3.53
Mj_1_GCCAAT_L005_R1_001_(paired)_trimmed_(paired)_contig_20284	8.47	17.26	1.56	0.42	1.18	0	1.04
TR76091|c0_g1_i1	28.54	53.16	5.03	0.72	1.23	0.51	3.32
TR76091|c0_g1_i2	17.15	29.38	2.7	0	0.54	0.4	1.31
Mj_1_GCCAAT_L005_R1_001_(paired)_trimmed_(paired)_contig_1543	27.53	46.28	33.42	23.82	22.9	21.9	26.7
TR69750|c0_g1_i2	19.91	33.58	24.11	14.8	16.91	17.95	20.05
TR70224|c0_g1_i1	27.86	46.28	30.17	22.06	23.59	22.79	23.56
TR68125|c1_g1_i7	5.97	3.24	1.44	0.43	1.22	1.21	2.54
TR64904|c0_g1_i5	2.6	2.29	5.66	4.15	4.11	4.17	4.22
Mj_1_GCCAAT_L005_R1_001_(paired)_trimmed_(paired)_contig_3888	9.05	3.53	8.67	9.98	10.02	8.48	5.9
TR56382|c0_g1_i1	21.34	21.83	3.5	2.35	4.43	4.32	4.39
TR65018|c0_g1_i2	13.6	13.39	42.19	43.61	47.87	33.9	37.84
TR58724|c0_g1_i1	51.53	42.45	8.81	5.47	5.02	4.02	9.92
TR58724|c0_g1_i2	54.78	46.95	11.52	5.72	6.33	4.3	13.48
Mj_1_GCCAAT_L005_R1_001_(paired)_trimmed_(paired)_contig_7630	11.27	7.52	15.38	18.09	18.4	16.54	11.67
TR75556|c1_g2_i1	4.98	3.29	6.25	5.71	7.98	7.11	6.17
Mj_1_GCCAAT_L005_R1_001_(paired)_trimmed_(paired)_contig_1682	16.6	18.33	8	7.2	10.33	5.88	8.1
TR76618|c0_g1_i2	14.5	15.35	8.13	8.56	8.31	6.09	7.55
TR77718|c0_g3_i3	6.33	6.99	4.55	3.43	4.95	4.31	4.13
TR57749|c0_g1_i4	5.99	9.1	4.55	0.36	0.11	0.25	3.3
TR66432|c0_g1_i2	3.14	9.8	1.33	2.34	2.71	1.4	3.03
TR66432|c0_g1_i4	3.12	8.82	1.16	2.32	3.6	1.58	2.58
TR32132|c0_g1_i1	50.42	57.35	11.65	1.49	3.16	0.26	21.33
Mj_1_GCCAAT_L005_R1_001_(paired)_trimmed_(paired)_contig_8024	10.11	5.88	7.94	12.1	11.62	11.39	10.12
TR78318|c0_g2_i1	13.26	11.37	16.89	17.52	14.55	17.22	13.53
TR78318|c0_g2_i3	10.33	6.41	15.85	12.75	12.81	13.43	12.34
TR78491|c0_g9_i1	10.74	9.94	16.83	15.45	15.13	18.58	14.56
TR60168|c0_g1_i4	4.06	2.28	4.78	4.03	5.23	5.04	3.93
TR69304|c0_g1_i1	7.82	12.57	3.61	6.62	7.54	4.83	4.19
Mj_1_GCCAAT_L005_R1_001_(paired)_trimmed_(paired)_contig_16168	4.94	7.22	2.36	0.11	0.75	0.64	1.56
TR68149|c0_g1_i1	5.93	7.14	1.75	0.39	1.11	0.46	1.63
TR68149|c0_g1_i3	3.72	5.35	1.32	0.22	0.32	0.16	1.25
TR68149|c0_g1_i4	5.19	5.31	2.37	0.31	0.86	0.11	1.71
TR68149|c0_g1_i5	10.72	8.89	1.8	0.81	0.76	0.14	1.89
TR55544|c0_g1_i1	32.7	46.01	132.83	174.66	188.49	178.69	169.07
TR76226|c0_g1_i2	7.61	5.49	2.16	2	2.76	2.05	3.3
TR78965|c2_g1_i1	30.41	22.07	9.57	6.84	10.58	9.16	13.03
TR78965|c2_g1_i2	17.54	16.68	9.11	4.86	10.05	8.25	8.87
TR74570|c1_g1_i3	4.66	2.15	7.75	7.14	6.24	7.31	7.6
TR52422|c0_g1_i1	41.92	40.66	73.32	61.3	53.89	58.73	62.45
scaffold10708	32.35	30.44	54.65	46.47	42.16	48.69	50.17
TR66975|c2_g1_i2	4.56	5.22	0.94	2.36	4.44	1.78	0.67
C945326	4.16	5.06	1.52	0.68	1.5	0.32	1.98
TR51479|c0_g1_i2	11.23	7.28	17.79	14.4	19.16	15.51	15.9
TR71760|c0_g1_i3	6.45	4.38	0.51	0.17	0	0.73	0.32
TR78645|c0_g1_i2	9.65	8.21	1.76	2.02	2.04	2.61	3.02
TR56963|c1_g2_i2	19.8	27.59	8.02	5.49	6.54	7.69	10.04
TR76893|c1_g1_i3	6.44	2.66	7.7	6.48	8.36	8.48	5.51
TR78561|c3_g1_i5	4.38	3.11	8.13	6.03	5.69	6.38	6.31
TR71151|c0_g1_i1	27.01	21.13	8.02	5.66	4.63	6.01	7.32
TR63076|c0_g2_i3	6.11	3.92	1.38	2.24	1.23	1.05	1.62
TR63076|c0_g2_i4	7.95	4.27	1.69	0.94	1.4	1.79	4.01
Mj_1_GCCAAT_L005_R1_001_(paired)_trimmed_(paired)_contig_130	559.15	712.38	132.77	14.83	20.55	10.5	208.59
TR56590|c0_g2_i1	1016.14	1346.51	248.85	29.05	33.58	18.97	363.27
TR53499|c0_g1_i1	3.04	7.19	0.42	0	0	0.2	1.76
TR77889|c0_g2_i1	17.83	10.29	4.1	4.85	6.47	3.78	3.44
TR60629|c0_g1_i1	49.72	33.16	16.54	25.88	15.54	21.33	21.46
TR73094|c0_g6_i1	86.16	60.76	31.45	41.82	28.54	34.54	30.95
Mj_1_GCCAAT_L005_R1_001_(paired)_trimmed_(paired)_contig_91	104.31	157.8	11.97	2.51	2.76	2.93	26.65
TR67588|c0_g1_i1	259.87	383.93	30.43	6.31	8.77	6.81	57.37
TR60490|c0_g1_i1	20.11	9.49	0.11	0	0	0.2	1.81
TR60490|c0_g1_i2	16.84	9.51	0.19	0.13	0.37	0.28	2.36
Mj_1_GCCAAT_L005_R1_001_(paired)_trimmed_(paired)_contig_2516	61.63	60.28	11.12	2.14	4.48	2	12.12
TR59726|c0_g1_i1	48.35	55.49	9.09	1.88	2.73	1.32	8.8
TR76166|c0_g1_i1	7.88	4.58	4.47	2.8	2.81	1.33	1.91
TR76166|c0_g2_i1	7.33	5.11	0.72	0.48	0.69	2.71	1.81
TR63806|c0_g1_i1	3.49	6.94	3.29	3.33	1.8	1	2.07
TR66053|c0_g1_i4	6.17	5.68	10.42	13.42	11.45	9.98	10.98
Mj_1_GCCAAT_L005_R1_001_(paired)_trimmed_(paired)_contig_38711	2.26	1.61	3.4	5.2	3.49	2.73	4.78
TR69480|c0_g1_i1	2.35	1.25	3.41	4.45	4.69	3.73	5.14
Mj_1_GCCAAT_L005_R1_001_(paired)_trimmed_(paired)_contig_16131	3.86	6.13	3.39	1.38	1.84	1.76	3.6
TR56706|c0_g1_i1	6.7	10.33	5.71	3.65	5.16	4.42	6.97
TR67162|c0_g1_i3	4.06	5.1	5.13	6.06	5.83	6.25	5.75
Mj_1_GCCAAT_L005_R1_001_(paired)_trimmed_(paired)_contig_196	43.54	100.29	11.84	4.87	1.45	9.24	25.92
TR54010|c0_g1_i1	10.82	8.22	13.27	9.98	14.18	14.48	11.76
TR63587|c0_g1_i3	8.45	5.73	1.82	0.38	1.31	0.93	2.04
TR64580|c0_g2_i2	11.73	7.15	2.54	1.02	1.93	1.21	2.49
TR64580|c0_g2_i3	8.27	5.84	2.43	1.32	0.83	1	1.43
TR78712|c1_g1_i5	6.18	13.31	3.38	3.14	4.93	2.44	6.73
TR78712|c1_g1_i6	4.39	7.26	2.12	2.53	3.87	1.99	3.15
TR54882|c0_g1_i2	14.71	12.13	23.76	28.17	19.63	17.15	16.47
TR79873|c0_g2_i1	6.24	5.01	0.71	0	0.3	0	2.38
TR72843|c2_g1_i4	10.15	10.31	8.45	5.83	7.36	8.24	7.3
TR68370|c1_g2_i1	17.65	36.03	18.47	12.15	15.28	11.34	17.35
TR76129|c2_g1_i1	10.17	25.33	10.53	7.12	8.91	8.7	10.69
TR58003|c0_g1_i4	6.33	5.3	3.14	1.85	1.83	0.65	2.52
TR78062|c0_g1_i2	5.51	5.48	1.67	0.95	1.19	0.77	2.12
TR78647|c1_g1_i1	6.7	5.75	2.08	1.04	0.98	1.06	2.48
TR68007|c0_g1_i1	3.41	3.25	10.84	13.03	12.03	8.08	7.5
Mj_1_GCCAAT_L005_R1_001_(paired)_trimmed_(paired)_contig_1506	41.66	81.45	4.23	3.74	3.53	5.17	10.45
Mj_1_GCCAAT_L005_R1_001_(paired)_trimmed_(paired)_contig_1834	31.67	60.8	2.73	2.63	4.8	4.42	8.39
Mj_1_GCCAAT_L005_R1_001_(paired)_trimmed_(paired)_contig_5552	41.21	81.77	8.03	6.12	7.76	8.2	13.44
TR79537|c2_g1_i1	53.54	102.45	8.55	5.74	7.8	7.91	14.79
C942670	99.46	283.93	19.9	5.56	5.01	5.07	30.79
Mj_1_GCCAAT_L005_R1_001_(paired)_trimmed_(paired)_contig_1850	114.66	346.98	19.61	9.71	5.43	9.75	31.49
TR47912|c0_g1_i1	133.1	421.73	24.15	6.44	7.2	9.15	48.48
Mj_1_GCCAAT_L005_R1_001_(paired)_trimmed_(paired)_contig_3917	5.68	4.45	6.73	7	7.79	7.68	6.96
TR74071|c0_g1_i1	6.21	5.53	8.03	8.92	9.01	9.82	7.7
scaffold12476	57.04	49.62	73.58	68.67	70.14	79.34	82.06
TR47295|c0_g1_i1	6.18	7.82	2.35	0.58	0.27	0.81	3.58
TR47295|c0_g1_i2	3.23	5.35	2.07	0.93	0	0	1.44
TR63155|c0_g1_i2	47.94	47.3	12.33	2.63	4.11	2.19	15.66
TR63155|c0_g1_i3	19.55	19.04	2.96	1.14	1.61	1.19	3.36
scaffold10426	37.21	32.76	7.99	2.49	3.25	1.54	12.18
Mj_1_GCCAAT_L005_R1_001_(paired)_trimmed_(paired)_contig_2275	6.67	7.01	15.08	14.66	14.4	18.13	15.39
TR66600|c0_g1_i4	3.32	4.63	9.62	7.15	7.81	11.33	9.23
TR73040|c0_g1_i2	3.37	2.65	8.15	7.36	5.78	6.6	7.55
scaffold13874	1.71	1.5	4.03	5	4.61	3.42	5.01
Mj_1_GCCAAT_L005_R1_001_(paired)_trimmed_(paired)_contig_3903	105.09	70.37	23.02	12.22	11.13	9.21	19.52
TR63005|c0_g1_i1	128.01	87.87	30.52	17.7	12.95	12.83	26.2
scaffold13999	104.19	66.92	23.09	14.64	12.38	10.38	21.79
TR60029|c0_g3_i1	4.14	5.8	2.58	1.35	2.37	2.03	3.12
TR60029|c0_g3_i2	4.43	7.08	3.38	2.09	4.66	2.26	2.6
scaffold12187	2.84	5.43	2.23	1.5	1.98	3.14	1.68
TR54032|c0_g1_i1	13.08	26.77	15.4	4.45	5.35	0.35	7.98
scaffold13477	6.86	18.53	4.12	1.16	4.8	0.49	4.46
TR47673|c0_g1_i2	201.56	118.61	38.17	8	14.34	6.15	33.77
scaffold14387	11.37	6.58	16.89	18.31	13.93	19.55	13.55
TR59583|c2_g1_i1	8.19	10.7	2.71	2.28	2.36	2.87	4.54
TR59583|c2_g1_i7	5.82	7.29	2.94	0.93	2.25	1.48	4.52
TR67059|c0_g1_i2	8.86	6.67	0.89	1.19	2.25	1.04	2.78
TR51060|c0_g1_i1	50.04	51.55	9.47	3.76	4.43	1.84	14.83
TR52114|c0_g1_i1	55.4	49.49	9.25	5	3.44	1.88	15.28
TR67224|c0_g1_i5	5.31	3.76	6.97	7.54	8.13	7.82	7.62
TR68596|c0_g1_i6	9.38	11.5	4.58	1.11	1.65	1.22	6.6
TR68596|c0_g1_i5	3.03	5.09	1.53	0.23	0.76	0.73	2.28
TR64023|c0_g1_i4	3.62	5.29	7.63	8.16	7.97	6.97	6.57
TR77179|c1_g2_i1	3.32	4.88	12.58	10.54	9.04	7.22	12.55
TR59310|c0_g1_i2	9.47	11.23	0.91	0.88	1.98	0.12	4.35
TR59310|c0_g1_i3	10.7	11.85	2.44	0.79	2.24	0.37	3.44
TR59310|c0_g1_i4	17.06	18.17	2.76	1.77	3.84	1.49	6.82
TR59310|c0_g1_i5	10.91	9.73	1.32	0.83	1.95	0.87	3.25
TR59310|c1_g1_i4	12.88	14.59	2.46	1.05	3.63	0.61	3.26
TR59310|c1_g1_i5	10.8	10.7	1.61	0.96	2.83	0.67	4.07
Mj_1_GCCAAT_L005_R1_001_(paired)_trimmed_(paired)_contig_16716	12.98	17.02	35.45	35.47	23.64	24.74	25.24
TR61786|c0_g1_i1	18.01	16.48	36.28	41.9	25.87	29.25	25.85
TR75131|c2_g1_i5	6.97	8.5	3.93	3.8	6.13	6.39	4.24
TR75723|c0_g2_i1	8.46	6.61	4.92	2.43	3.67	4.43	4.73
Mj_1_GCCAAT_L005_R1_001_(paired)_trimmed_(paired)_contig_21862	2.68	13.7	0.18	1.34	1.49	0.6	7.56
Mj_1_GCCAAT_L005_R1_001_(paired)_trimmed_(paired)_contig_2455	10.12	6.3	3.37	4.21	3.43	4.2	3.01
TR70827|c0_g1_i1	10.41	6.14	3.08	3.84	2.54	4.64	3.7
TR68814|c0_g1_i4	4.89	4.64	6.49	6.31	6.42	6.51	7.21
Mj_1_GCCAAT_L005_R1_001_(paired)_trimmed_(paired)_contig_468	204.86	286.09	65.23	20.36	37.32	11.28	102.88
TR46640|c0_g1_i1	1416.66	1811.83	764.63	45.84	91.99	48.46	545.28
TR65216|c0_g1_i2	10.34	13.43	5.32	4.46	4.49	3.46	7.38
TR65424|c1_g2_i3	8.89	12.45	4.91	3.44	3.81	3.59	7.88
TR65424|c1_g2_i4	9.17	10.18	5.22	3.32	5.51	3.34	7.07
TR64031|c0_g1_i1	4.58	2.27	4.55	5.84	4.28	4.83	6.34
TR58806|c0_g1_i2	70.81	139.39	81.08	77.03	60.51	64.34	71.64
TR72008|c0_g2_i3	3.08	1.88	8.24	5.3	6.23	7.09	6.87
TR72838|c0_g1_i2	5.38	3.79	8.63	9.57	11.02	9.27	9.11
TR76552|c0_g1_i3	15.79	19.34	9.2	8.9	8.52	13.11	10.4
TR79238|c0_g3_i2	10.01	12.39	6.03	7.58	6.25	7.82	9.05
Mj_1_GCCAAT_L005_R1_001_(paired)_trimmed_(paired)_contig_24342	6.81	22.86	3.7	1.11	0.26	0.58	7.91
TR75042|c5_g2_i3	62.79	169.28	37.77	5.44	5.45	2.57	54.39
TR52059|c0_g1_i1	73.55	149.47	27.8	8.32	12.32	4.26	16.5
TR69452|c1_g1_i2	8.16	6.72	2.99	3.27	5.26	1.55	2.03
TR70616|c1_g1_i1	6.5	6.31	2.88	3.07	4.35	1.15	2.48
TR60847|c2_g1_i1	19.41	18.16	66.32	47.44	51.04	48.9	45.13
TR66477|c0_g1_i1	42.78	24.46	6.65	2.16	3.23	5.89	5.86
TR66838|c0_g1_i2	49.91	30.66	7.91	4.79	4.65	7.5	7.31
TR67944|c0_g1_i3	10.08	7.4	4.08	2.17	2.83	3.27	6.32
TR69017|c0_g1_i2	17.18	14.04	6	4.45	4.28	4.13	8.97
TR76258|c1_g1_i6	3.71	2.85	5.56	5.7	5.31	4.63	5.46
TR76675|c0_g1_i1	4.45	2.75	4.9	5.2	6.46	6.19	5.55
Mj_1_GCCAAT_L005_R1_001_(paired)_trimmed_(paired)_contig_221	155.69	126.6	51.18	47.42	35.04	46.32	43.35
TR57299|c0_g1_i1	151.7	128.39	44.49	44.13	33.29	41.63	43.18
TR73969|c0_g1_i3	5.75	7.82	1.84	0.39	0.12	0.18	2.52
TR73969|c0_g1_i5	5.7	10.19	1.91	0.69	0.83	0.18	1.6
TR73969|c0_g1_i7	8.06	12.76	1.62	0.66	0.69	0.15	2.45
TR74260|c0_g1_i2	7.96	11.09	1.84	0.23	0.53	0.55	2.39
TR74260|c0_g1_i4	5.36	8.11	2.19	0.54	1.27	0.25	2.23
TR50344|c0_g1_i1	4.98	7.15	0.6	0	0	0.38	3.08
TR53707|c0_g1_i1	98.43	59.12	22.31	8.57	14.14	4.61	26.98
TR55200|c0_g1_i1	18.2	14.36	33.54	44.71	48.26	38.11	40.1
scaffold13867	9.96	8.26	5.77	5.62	5.08	7.88	5.51
TR55468|c0_g2_i2	8.42	16.33	2.48	0.33	2.2	1.86	4.97
TR71921|c1_g2_i2	2.58	0.75	6.2	6.24	4.87	5.86	4.87
TR50918|c0_g1_i1	109.94	102.73	15.49	17.36	19.11	8.17	17.32
TR75323|c1_g1_i3	10.18	7.2	2.47	2.53	4.15	1.37	3.09
TR75323|c1_g1_i5	5.69	4.57	1.57	1.6	2.51	0.25	1.98
Mj_1_GCCAAT_L005_R1_001_(paired)_trimmed_(paired)_contig_6847	23.76	18.66	42.66	41.04	40.55	42.24	33.52
TR61863|c0_g1_i1	24.01	20.91	47.12	43.53	46.04	42.34	35.32
TR61863|c0_g1_i2	21.61	16.86	28.42	30.81	35	31.42	31.75
TR74398|c0_g3_i1	20.65	16.69	29.98	36.84	32.59	29.53	29.82
TR54391|c0_g1_i3	6.47	8.5	3.1	0.08	0	0.06	0.1
TR56301|c0_g1_i2	5.87	5.5	1.67	0	0	0	0
TR56301|c0_g1_i4	5.05	4.18	2.16	0	0.34	0	0.23
TR59516|c0_g1_i4	10.08	7.96	1.19	1.11	1.24	0.49	1.94
TR61623|c0_g1_i4	14.7	13.64	2.57	1.56	1.47	0.59	1.94
Mj_1_GCCAAT_L005_R1_001_(paired)_trimmed_(paired)_contig_8929	19.73	12.55	47.14	58.27	55.82	61.75	41.38
TR72457|c2_g1_i1	17.18	9.73	31.02	41.85	35.38	41.18	29.74
TR78919|c3_g1_i1	12.55	7.14	21.05	26.34	20.61	28.94	22.03
TR61048|c0_g1_i2	7.83	20.21	4.47	1.19	1.82	0.77	7.8
TR61048|c0_g1_i3	5.29	10.28	2.86	0.67	1.11	0.71	4.49
TR72580|c0_g1_i1	8.58	34.57	5.83	0	0	0.31	4.78
scaffold12540	6.65	26.69	4.83	0	0	0.26	3.66
TR63972|c0_g1_i1	11.43	9.28	3.54	1.27	1.73	0.69	4.55
TR68273|c0_g1_i3	2.27	2.04	4.63	3.9	3.67	5.12	3.65
TR78373|c1_g1_i14	7.3	9	3.26	0.4	0.57	0.7	2.48
TR78405|c1_g1_i2	7.32	6.86	1.63	0.44	1.03	0.15	1.5
TR78405|c1_g1_i3	8.08	6.31	2.16	0.39	0.55	0.14	2.54
C974612	11.51	18.35	6.55	4.93	5.14	1.81	2.3
Mj_1_GCCAAT_L005_R1_001_(paired)_trimmed_(paired)_contig_6148	11.17	17.81	6.17	5.51	5.2	2.16	1.65
TR46104|c0_g1_i2	7.75	14.81	4.56	3.84	5.07	1.97	1.59
TR60734|c0_g2_i1	7.35	7.62	11.82	12.99	12.86	9.28	13.14
TR60734|c0_g2_i2	5.81	5.71	11.08	8.52	9.83	9.04	9.93
Mj_1_GCCAAT_L005_R1_001_(paired)_trimmed_(paired)_contig_14181	2.72	2.58	4.07	5.07	4.78	4.32	4.33
Mj_1_GCCAAT_L005_R1_001_(paired)_trimmed_(paired)_contig_12625	9.57	12.25	6.37	5.25	6.6	6.82	4.57
TR69082|c1_g6_i1	14.81	23.16	6.86	8.31	7.41	8.04	7.09
TR64550|c0_g1_i1	11.76	12.53	7.3	9.43	9.73	7.43	6.77
TR64550|c1_g1_i1	17.62	14.75	10.43	12.91	11.47	9.24	9.21
TR55954|c0_g1_i2	6.67	6.27	9.94	12.77	12.17	8	10.18
TR60543|c0_g1_i2	14.19	52.54	5.93	5.54	7.33	1.75	25.29
TR64223|c0_g1_i1	9.85	6.97	13.16	12.78	12.53	12.05	13.48
TR64223|c0_g1_i2	6.21	4.61	9.26	8.39	8.89	8.71	9.24
TR71050|c0_g1_i2	8.02	5.78	3.45	2.67	2.41	1.71	4.34
TR73387|c0_g1_i1	10.61	6.99	3.55	3.65	2.35	1.88	6.67
TR75866|c0_g2_i1	18.23	15.84	8.14	7.63	7.07	6.22	6.54
TR75866|c0_g2_i2	8.14	6.38	3.94	2.67	4.86	3.07	2.48
TR76018|c0_g2_i6	2.84	2.36	4.62	5.01	4.18	4.92	3.76
TR62151|c0_g1_i1	30.37	72.81	7.72	9.13	6.13	1.29	15.42
scaffold13131	27.68	63.75	6.25	9.86	5.19	0.9	13.67
TR70398|c1_g1_i3	6.69	6.2	4.36	3.09	4.39	3.26	4.8
TR67719|c0_g1_i6	3.95	2.43	5.15	4.93	5.49	5.65	3.62
TR65461|c0_g2_i1	42.15	26.01	8.59	10.79	10.49	9.61	8.15
TR65461|c0_g2_i2	27.57	18.58	7.07	6.44	7.79	7.75	6.25
TR78209|c0_g4_i3	10.51	18.1	6.26	1.08	1.43	1.67	6.59
TR78209|c0_g4_i4	8.79	20.13	6.83	0.53	1.49	1.47	5.4
TR41170|c0_g1_i1	0.49	5.82	1.71	0.38	0	0.27	0.24
scaffold10570	0.13	16.15	1.83	0.62	0.58	0.07	0.58
Mj_1_GCCAAT_L005_R1_001_(paired)_trimmed_(paired)_contig_11167	3.19	9.99	0	0	0	0.24	0
TR72264|c2_g2_i3	4.96	6.58	0.1	1.81	2.81	0.45	1.77
TR72761|c4_g1_i1	10.51	14.32	0.22	0	0	0	0.75
TR72761|c4_g1_i2	7.02	11.27	0.78	1.48	3.08	0.66	1.96
scaffold12392	6.07	10.54	0.18	0	0	0.08	0.67
TR57951|c0_g2_i3	8.41	3.57	10.54	9.89	12.2	8.96	7.76
TR67592|c0_g1_i10	5.01	4.62	2.09	0.13	0.61	0.27	2.08
Mj_1_GCCAAT_L005_R1_001_(paired)_trimmed_(paired)_contig_33	1181.58	1187.36	326.61	15.44	22.33	16.99	450.22
TR76368|c0_g1_i1	8.04	5.32	7.23	8.86	8.36	8.93	8.7
TR76368|c0_g1_i2	8.47	5.65	9.67	8.53	8.94	9.7	9.31
TR67108|c0_g1_i1	16.97	11.18	2.16	2	1.45	1.4	2.53
TR67108|c0_g1_i2	17.56	9.56	3.37	2.32	2.04	1.28	3.24
Mj_1_GCCAAT_L005_R1_001_(paired)_trimmed_(paired)_contig_2278	13.58	7.86	3.33	2.87	3.22	4.35	3.01
TR74424|c0_g1_i1	15.98	10.56	4.72	3.64	4.45	7.84	3.9
TR74722|c0_g1_i2	6.01	3.54	1.74	1.43	1.55	2.85	1.6
TR74722|c0_g1_i5	8.47	4.37	1.02	1.37	1.62	1.92	1.5
TR56883|c2_g2_i3	7.04	11.51	6.59	4.67	4.25	4.82	5.69
TR56883|c2_g2_i5	9.7	15.06	6.47	6.01	3.81	5.11	7.24
TR61263|c1_g5_i3	9.74	12.64	6.79	3.83	4.34	3.49	7.19
TR62552|c0_g1_i3	3.23	7.91	2.06	1.22	1.07	2.51	1.68
TR65903|c0_g2_i2	3.97	7.66	1.69	1.67	1	2.83	1.42
scaffold13041	5.18	4.87	6.73	5.95	5.79	6.25	6.54
TR60683|c0_g1_i2	3.44	10.48	0.58	0	0	0.11	1.07
TR60683|c0_g1_i3	4.78	19.07	0.49	0.13	0	0.09	1.74
TR60683|c0_g1_i4	2.59	11.3	0.19	0	0	0	1.12
TR60887|c0_g1_i2	1.97	6.3	0.52	0	0	0	0.22
Mj_1_GCCAAT_L005_R1_001_(paired)_trimmed_(paired)_contig_8322	27.97	64.92	14.09	4.99	6.14	6.18	11.67
Mj_1_GCCAAT_L005_R1_001_(paired)_trimmed_(paired)_contig_648	95.84	138.89	25.77	7.61	9.89	7.92	15.33
TR55715|c0_g1_i1	71.6	121.79	21.39	4.99	8.59	5.62	13.88
Mj_1_GCCAAT_L005_R1_001_(paired)_trimmed_(paired)_contig_5542	12.64	17.9	8.46	6.55	5.78	9.02	7.48
TR75195|c0_g1_i2	12.57	21.24	8.96	8.2	8.54	12.25	10.2
TR75654|c0_g1_i1	17.43	26.34	11.23	12.07	10.54	14.32	13.26
scaffold14535	13.5	21.3	7.2	7.05	7.11	10.74	9.83
scaffold14536	15.41	22.09	8.12	8.07	8.47	13.06	10.44
TR60303|c0_g1_i1	128.06	81.96	16.63	8.47	9.7	8.11	15.83
scaffold10868	82.95	57.58	9.74	8.1	5.79	5.66	11.45
TR77486|c0_g1_i1	2.75	2.68	5.45	3.79	3.69	4.87	5.26
TR65687|c0_g1_i1	5.09	2.92	0.34	0	0.22	0.97	0.29
TR65788|c0_g1_i1	9.27	4.26	1.48	0.38	1.65	1.14	1.24
TR61026|c0_g4_i2	18.31	21.18	51.37	75.06	73.42	40.23	36.58
TR57665|c0_g1_i1	147.94	300.94	78.89	15.94	30.48	10.53	45.74
scaffold14452	86.69	179.79	52.72	13.45	22.81	8.28	24.08
TR73290|c1_g2_i1	1.59	4.38	7.26	7.54	9.47	6.05	5.73
TR53612|c0_g1_i1	93.58	142.59	28.63	16.73	23.87	9.71	31.28
TR57879|c0_g1_i5	6.48	4.77	3	2.5	2.5	2.3	3.97
Mj_1_GCCAAT_L005_R1_001_(paired)_trimmed_(paired)_contig_13121	12.43	23.47	2.29	1.85	2.06	1.53	2.66
TR67905|c0_g2_i2	17.05	33.75	2.55	1.58	2.69	1.16	2.23
TR67905|c0_g2_i5	12.44	21.44	1.79	0.52	1.31	0.48	1.18
TR63414|c0_g1_i1	59.11	51.57	129.85	149.56	133.85	128.06	116.86
TR46920|c0_g1_i2	5.53	4.64	2.99	1.82	1.72	3.31	2.95
Mj_1_GCCAAT_L005_R1_001_(paired)_trimmed_(paired)_contig_1467	35.94	51.45	1.06	1.05	0.49	0.55	1.62
TR55307|c0_g1_i1	46.72	57.09	0.47	0.89	1.33	0.45	1.9
Mj_1_GCCAAT_L005_R1_001_(paired)_trimmed_(paired)_contig_9584	17.47	31.86	0.61	0	0.39	0.19	0.94
TR56674|c0_g1_i1	28.1	53.35	1	0.41	0.38	0.66	2.02
TR75597|c1_g2_i4	6.3	7.01	2.97	3.59	3.37	3.06	1.49
TR64899|c0_g2_i1	10.51	12	5.35	6.8	8.35	7.49	7.44
TR62008|c0_g1_i2	10.24	5.87	9.82	9.05	13.22	11.93	10.02
TR68601|c0_g1_i1	33.54	44.72	12.89	3.46	3.02	2.89	14.38
TR68601|c0_g1_i2	6.95	9.1	3.63	0.44	0.83	1.03	3
TR61136|c0_g1_i6	6.01	7.61	2.04	0.74	0.35	0.26	2.05
TR70992|c0_g1_i2	8.24	10.61	3.35	4.05	4.1	2.7	4.79
TR72159|c0_g1_i3	4.34	6.44	2.25	2.49	3.22	1.36	2.29
Mj_1_GCCAAT_L005_R1_001_(paired)_trimmed_(paired)_contig_367	82.84	126.24	14.05	4.24	7.98	3.27	13.85
TR62596|c0_g1_i1	112.18	168.59	18.67	7.59	9.6	4.08	14.93
Mj_1_GCCAAT_L005_R1_001_(paired)_trimmed_(paired)_contig_809	16.92	50.25	24.47	13.54	14.12	20.47	17.26
TR65767|c0_g1_i1	15.6	63.58	17.18	10.15	11.83	16.92	11.93
TR70280|c0_g1_i6	5.06	3.75	2.2	0.16	0.46	0.23	1.95
TR74151|c2_g8_i1	23.28	21.32	12.46	6.69	8.26	4.67	13.52
TR65806|c0_g3_i1	16.06	19.61	25.63	27.05	24.5	21.35	24.69
TR67025|c0_g9_i1	6.39	4.42	8.41	11.48	8.91	10.9	11.49
TR67302|c0_g1_i1	6.29	4.24	8.43	10.01	11.22	9.3	10.07
TR74887|c1_g1_i4	3.91	3.13	6.77	9.52	6.14	7.06	7.34
TR74411|c0_g1_i1	6.54	5.8	2.18	3.37	3.18	1.77	3.58
TR74411|c0_g1_i2	6.91	6.49	2.18	1.86	2.34	1.73	3.75
TR74941|c2_g1_i2	15.9	20.44	9.7	9.26	8.8	10.65	11.37
TR62173|c0_g1_i2	5.28	4.33	2.33	2.1	2.78	2.06	3.85
TR77387|c0_g2_i1	6.31	9.25	0.04	0	0.06	0.08	0.33
TR77387|c0_g2_i5	6.8	10.15	0.04	0	0	0.12	0.45
TR77387|c0_g2_i8	6.04	10.07	0.08	0.06	0	0.04	0.74
TR77559|c0_g2_i1	5.25	12.17	0	0	0	0	0.43
TR77559|c0_g2_i2	4.77	7.94	0	0	0	0.18	0.31
TR77559|c0_g2_i3	3.27	6.46	0	0	0	0	0.12
TR77559|c0_g2_i4	5.66	6.34	0	0	0	0.08	0.2
TR77559|c0_g2_i5	3.54	5.22	0	0	0	0.13	0.45
TR77559|c0_g3_i1	6.33	12.93	0.07	0	0	0	0.19
TR77559|c0_g3_i3	6.24	12	0.08	0	0.1	0	0.62
scaffold10192	4.57	7.31	0.09	0	0	0.04	0.15
Mj_1_GCCAAT_L005_R1_001_(paired)_trimmed_(paired)_contig_5667	21.57	14.47	36.41	37.91	41.38	39.45	25.94
TR60113|c1_g2_i1	7.12	5.86	3.12	3.55	3.97	2.79	3.85
Mj_1_GCCAAT_L005_R1_001_(paired)_trimmed_(paired)_contig_3946	9.84	12.9	5.81	5.04	3.96	4.52	4.8
TR73213|c1_g1_i2	6.44	10.95	1.61	1.68	2.35	2.7	1.31
TR73213|c1_g1_i3	4.98	10.4	1.94	1.51	1.9	2.12	1.18
TR73213|c1_g1_i4	6.88	13.09	2.11	1.37	2.48	2.17	1.18
Mj_1_GCCAAT_L005_R1_001_(paired)_trimmed_(paired)_contig_11366	22.85	26.05	11.11	5.84	5.75	3.02	9.64
TR78516|c3_g2_i2	2.94	4.69	8.08	6.21	8.19	7.6	7.92
TR67027|c0_g2_i1	8.48	4.32	1.01	0.55	0.57	0.85	4.88
Mj_1_GCCAAT_L005_R1_001_(paired)_trimmed_(paired)_contig_6398	13.8	7.47	0.12	0.08	0	0.05	0.87
TR55259|c0_g1_i1	12.99	7.81	0	0	0.16	0	1.37
TR68188|c0_g1_i2	10.38	5.3	0.22	0	0.14	0	0.73
TR69087|c0_g1_i3	23.54	15.04	5.61	0.75	2	1.05	10.43
TR52204|c0_g1_i1	64.01	46.01	122.16	131.49	147.03	147.66	91.44
C960474	60.27	85.21	30.4	21.63	22.84	27.66	34.01
TR50386|c0_g2_i1	53.52	77.82	22.43	19.91	17.33	26.78	31.15
TR74479|c0_g1_i2	6.61	8.02	11.88	12.41	11.22	10.51	11.27
TR54306|c0_g2_i1	44.31	50.94	14.09	3.35	4.25	4.61	12.54
scaffold13762	27.28	30.85	11.15	2.61	3.21	3.51	8.72
scaffold13763	21.84	24.08	6.45	1.97	3.71	2.17	6.29
TR71210|c3_g1_i1	16.68	14.62	6.67	3.77	4.17	1.83	6.3
TR71210|c3_g1_i2	8.77	7.35	2.12	2.03	3.72	1.84	3.78
TR71210|c3_g1_i5	13.9	11.61	5.82	1.97	3.59	0.86	6.41
TR74302|c1_g4_i1	9.78	7.02	3.99	2.09	0.84	1.25	2.22
TR72624|c1_g1_i2	18.55	24.76	6.45	0.49	1.21	1.97	4.66
TR72748|c0_g2_i1	21.25	29.58	7.61	0.58	0.88	1.92	5.63
TR72748|c0_g2_i2	22.68	29.54	8.09	0.92	1.86	2.16	5.7
TR62310|c0_g1_i1	37.43	26.52	11.16	8.17	6.74	6.65	10.32
TR64990|c0_g1_i3	17.98	15.23	6.13	4.14	4.08	3.68	7
TR64990|c0_g1_i4	33.23	21.24	10.3	7.48	5.62	4.67	9.9
TR66720|c0_g1_i1	38.53	33.01	68.38	78.84	46.03	58.48	51.2
scaffold11889	2.69	2.04	3.02	5.13	3.32	3.53	4.54
TR59269|c0_g1_i2	17.47	8.97	6.33	2.14	4.87	3.49	4.53
TR74413|c0_g2_i2	11.81	7.71	3.81	3.64	2.86	2.33	3.67
Mj_1_GCCAAT_L005_R1_001_(paired)_trimmed_(paired)_contig_4220	9.89	7.77	3.88	4.59	4.75	4.56	5.28
TR61205|c0_g1_i1	7.98	6.54	3.96	2.8	3.93	3.42	3.38
TR79414|c0_g1_i6	6.77	5.74	1.53	0	0.39	1.15	2.05
TR79414|c0_g1_i8	2.77	5.11	0.25	1.01	1.59	0.47	1.05
Mj_1_GCCAAT_L005_R1_001_(paired)_trimmed_(paired)_contig_236	8.76	8.13	2.59	1.84	2.52	1.99	3.47
TR79033|c0_g2_i1	12.94	11.87	0.82	0.55	1.31	0.58	3.62
TR79033|c0_g2_i2	11.08	8.77	0.75	0.5	1.18	0.35	2.65
TR79033|c0_g4_i1	6.48	5.82	1.07	0.41	1.36	0.58	2.43
TR79033|c0_g4_i4	7.87	6.47	1.16	0.47	0.29	0.44	2.91
TR79033|c0_g4_i5	6.08	6.48	1.4	0.38	0.89	0.8	1.06
TR79414|c0_g13_i4	4.27	5.65	0.72	0.32	0.61	0	0.8
TR79414|c0_g13_i5	6.28	6.5	0.63	0	0.6	0.3	1.05
TR63067|c1_g1_i3	13.33	12.43	3.34	1.05	2.27	0.84	0.75
TR63067|c1_g1_i6	6	5.74	1.53	0.26	1.7	0	0.96
TR75218|c0_g1_i2	12.15	10.6	2.18	1.66	1.39	0.13	0.8
TR76611|c0_g3_i1	45.75	40.74	10.82	4.4	7.96	0.95	2.95
TR68883|c0_g2_i11	4.9	5.04	2.62	2.37	2.98	3.76	2.69
TR79050|c7_g1_i1	7.1	6.09	4.14	3.02	4.22	5.25	5.28
TR57474|c0_g1_i1	21.43	22.4	35.65	30.88	33.81	30.37	35.74
Mj_1_GCCAAT_L005_R1_001_(paired)_trimmed_(paired)_contig_6096	1.91	5.63	0.11	0.46	1	0	0
TR52101|c1_g1_i3	3.31	9.97	0	0.41	2.1	0	0.13
TR72942|c1_g2_i2	2.77	8.85	0.05	0.69	2.47	0.05	0.04
TR72942|c1_g2_i6	2.9	7.29	0.05	0.66	1.75	0	0.04
TR68194|c4_g4_i2	4.18	14.33	0.15	1.04	4.49	0	0.26
TR72942|c0_g1_i3	1.4	6.18	0	0.44	1.66	0.31	0.27
TR72942|c1_g2_i5	3.61	9.02	0.24	0	2.09	0	0
Mj_1_GCCAAT_L005_R1_001_(paired)_trimmed_(paired)_contig_1356	10.6	15.98	7	6.93	6.91	9.91	9.15
TR68095|c0_g3_i1	30.79	44.93	16.66	12.48	12.49	17.47	20.78
scaffold12772	8.11	13.39	4	3.91	4.46	5.52	5.6
scaffold12773	18.8	29.24	11.51	9.34	10.21	12.42	13.28
TR49144|c0_g1_i1	215	139.58	64.03	27.29	43.33	28.11	40.31
TR73563|c1_g2_i1	26.18	52.98	8.77	1.26	2.31	1.91	12.23
TR73563|c1_g2_i6	5.07	9.94	1.45	0.44	0.82	0.15	1.49
TR74075|c0_g3_i3	9.98	21.14	2.64	0.79	2.25	0.83	4.44
scaffold12677	3.82	7.83	1.33	0.23	0.74	0.49	1.36
scaffold13305	11.49	24.99	3.47	0.81	0.76	1.14	4.17
Mj_1_GCCAAT_L005_R1_001_(paired)_trimmed_(paired)_contig_3000	11.74	8.63	1.73	0	0	0.23	3.3
TR57552|c0_g1_i1	6.26	12.52	3.69	3.3	3.1	2.88	2.31
TR60092|c0_g1_i1	8.77	17.94	9.66	6.08	11.05	4.78	9.48
TR60092|c0_g1_i2	12.69	25.48	10.9	6	13.9	8.31	16.01
TR60092|c0_g1_i5	10.44	19.71	9.25	5.43	12.56	5.29	9.8
TR72819|c0_g2_i1	36.6	50.12	15.57	16.31	18.48	21.13	23.07
TR72819|c0_g2_i2	40.96	60.68	18.1	22.82	20.85	28.85	29.69
TR55043|c0_g1_i1	29.09	33.31	17.01	13.01	17.22	10.43	20.27
TR55043|c0_g1_i2	16.21	23.24	11.76	9.49	13.14	8.81	13.23
TR69505|c0_g1_i1	19.12	16.82	5.88	4.61	3.76	4.05	4.56
TR70239|c0_g1_i2	15.93	14.12	4.72	3.52	2.86	3.61	4.27
TR65671|c0_g1_i3	7.39	12.52	1.3	2.28	3.31	0.25	0.87
TR65671|c0_g1_i4	7.95	14.23	1.14	1.54	3.49	0.86	1.44
TR65671|c0_g1_i5	12.84	20.42	1.83	1.81	6.05	1.04	1.84
TR65671|c1_g1_i1	12.73	21.19	2.45	3.58	5.85	1.16	2.74
TR65671|c1_g1_i3	17.57	25.07	2.74	3.7	5.86	1.04	2.66
Mj_1_GCCAAT_L005_R1_001_(paired)_trimmed_(paired)_contig_8272	5.92	19.03	8.32	0	0.4	0.1	4.98
Mj_1_GCCAAT_L005_R1_001_(paired)_trimmed_(paired)_contig_937	50.59	121.74	6.52	0.64	0.78	0.51	9.18
TR55525|c0_g1_i2	65.64	144.93	11.58	1.8	3.11	1.68	9.88
TR68939|c2_g1_i3	78.33	153.75	65.78	3.03	3.84	1.57	27.92
TR68939|c3_g2_i2	90.4	190.85	79.63	5.19	5.3	1.69	33.63
scaffold14251	70.08	139.23	56.46	4.29	3.54	1.63	23.85
TR71241|c1_g2_i1	2.8	5.69	1.92	2.1	2.33	2.42	2.84
TR71241|c1_g2_i3	3.87	7.37	2.71	1.99	2.66	2.68	4.44
TR71241|c1_g2_i8	3.15	5.5	2.35	1.67	2.83	2.57	4.14
TR72309|c2_g1_i2	8.15	11.73	5.25	6.39	7.25	5.38	8.77
TR73341|c0_g1_i5	5.74	7.12	3.6	2.6	3.64	3.76	5.05
TR73341|c0_g1_i8	8.39	9.7	5.31	4.97	5.83	4.87	6.92
TR73357|c0_g1_i1	8.05	8.29	4.74	2.56	4.03	4.64	6.16
C972548	22.96	25.77	9.21	4.09	9.78	3.61	13.47
Mj_1_GCCAAT_L005_R1_001_(paired)_trimmed_(paired)_contig_22322	9.16	8.9	3.66	1.72	2.09	1.21	4.74
TR66359|c0_g1_i1	18.79	12.43	7.11	4.09	6.34	4.96	6.64
TR66359|c0_g1_i2	11.61	6.63	4.41	1.28	3.48	2.49	3.35
TR66581|c0_g1_i2	18.84	10.87	5.79	5.58	7.57	3.59	6.24
Mj_1_GCCAAT_L005_R1_001_(paired)_trimmed_(paired)_contig_1463	17.95	32.98	10.11	4.98	6.45	5.6	10.25
TR79169|c1_g2_i6	8.97	16.35	5.57	1.5	2.21	1.89	2.45
TR79169|c1_g2_i8	12.6	18.98	6.07	0.45	0	0.32	4.5
Mj_1_GCCAAT_L005_R1_001_(paired)_trimmed_(paired)_contig_80	599.73	1809.34	19.97	2.41	0	10.98	3.65
TR26298|c0_g1_i1	2.89	6.06	0	0	0	0	0
TR43952|c0_g1_i1	605.88	1900.53	22.87	1.45	0	10.43	3.75
TR43952|c0_g1_i2	655.61	1999.49	21.42	1.74	0	11.55	3.49
scaffold12130	623	1905.2	25.91	0.82	0.11	10.6	4.41
TR61941|c0_g1_i1	21.08	31.89	8.02	2.12	1.86	1.28	8.68
TR61941|c0_g1_i2	22.09	29.34	8.48	2.08	2.68	1.17	8.95
TR63417|c0_g1_i2	33.48	49.76	14.98	3.52	4.02	1.82	14.25
Mj_1_GCCAAT_L005_R1_001_(paired)_trimmed_(paired)_contig_9345	11.03	9.53	2.62	1.66	3.02	3.24	3.09
TR77049|c0_g1_i2	10.24	9.78	3.4	1.24	2.95	4	3.08
TR77049|c0_g1_i3	10.99	8.43	2.56	1.11	2.05	3.21	3.3
TR74367|c4_g1_i3	16.28	10.41	23.79	21.29	23.49	18.85	17.56
Mj_1_GCCAAT_L005_R1_001_(paired)_trimmed_(paired)_contig_7115	13.6	12.41	0.41	0.62	1.16	0.26	1.6
TR71993|c2_g1_i1	177.76	377.6	256.79	67.51	51.92	91.79	155.84
scaffold106	140.34	306.28	204.5	59.03	43.6	74.96	130.65
TR53862|c0_g2_i1	23.79	24.69	44.54	59.38	42.31	48.09	46.74
TR65205|c1_g1_i4	4.05	2.55	6.3	8.41	7.6	7.34	5.86
TR71824|c0_g1_i2	3.71	1.91	5.66	7.97	5.71	6.58	4.35
scaffold11631	8.23	7.6	10.86	12.7	11.1	10.74	11.08
TR64646|c0_g1_i2	5.05	9.71	2.52	0	0	0.1	2.12
TR64646|c1_g1_i1	5.59	13.62	3.67	0	0	0	3.89
TR75344|c2_g3_i1	0.24	2.09	3.99	5.74	1.44	0.8	1.67
TR69160|c0_g1_i2	7.94	6.85	1.17	0.39	0.62	0.09	3.02
TR70935|c0_g2_i3	12.66	12.86	2.78	2.99	3.47	1.74	3.92
TR70935|c0_g2_i6	13.83	13.36	5.46	3.54	4.64	2.05	2.67
Mj_1_GCCAAT_L005_R1_001_(paired)_trimmed_(paired)_contig_1900	11.84	13.53	2.03	2.75	3.58	3.32	2.82
TR70935|c1_g1_i10	14.47	15.38	2.83	2.58	3.48	3.1	3.98
TR70935|c1_g1_i12	7.06	7.73	1.09	1.66	3.64	1.8	2.17
TR70935|c1_g1_i2	12.44	12.29	2.7	2.22	4.25	2.92	3.24
TR70935|c1_g1_i3	13.02	14.6	3.65	2.58	4.59	2.88	4.43
TR70935|c1_g1_i5	13.22	15.08	2.88	3.54	4.1	3.67	4.53
TR70935|c1_g1_i7	12.2	11.69	2.96	2.15	5.4	2.91	3.5
TR70935|c1_g1_i8	7.69	8.4	1.08	0.58	1.91	2.23	1.8
TR78550|c3_g2_i3	3.6	6.69	3.98	1.43	2.68	2.74	2.44
Mj_1_GCCAAT_L005_R1_001_(paired)_trimmed_(paired)_contig_6188	7.71	9.57	15.92	16.34	13.74	17.2	12.59
TR65812|c0_g1_i2	9.01	9.23	13.96	14.17	15.9	14.79	13.56
TR66185|c0_g1_i2	8.41	7.69	13.05	14.88	12.15	15.3	11.55
TR57827|c0_g1_i1	35.73	16.56	46.95	54.09	65.93	43.45	40.39
TR76816|c0_g1_i1	9.39	9.44	15.02	12.2	11.56	14.5	14.45
Mj_1_GCCAAT_L005_R1_001_(paired)_trimmed_(paired)_contig_80050	0	7.15	0	0	0.84	0	0
Mj_1_GCCAAT_L005_R1_001_(paired)_trimmed_(paired)_contig_7131	5.86	2.64	0.45	0.7	0.28	0.28	2.8
TR48597|c0_g1_i4	7.67	5.04	14.68	14.71	17.68	10.82	10.24
Mj_1_GCCAAT_L005_R1_001_(paired)_trimmed_(paired)_contig_1408	112.11	68.86	15.6	18.42	19.58	11.96	22.03
scaffold10076	75.97	46.17	9.69	10.86	8.61	8.44	13.16
Mj_1_GCCAAT_L005_R1_001_(paired)_trimmed_(paired)_contig_2272	16.93	18.88	3.89	3.94	4.83	3.5	5.79
TR67431|c1_g1_i1	28.42	29.27	6.49	7.05	5.59	5.97	7.82
TR67431|c1_g1_i2	22.75	19.17	4.86	6.17	6.45	5.54	5.49
Mj_1_GCCAAT_L005_R1_001_(paired)_trimmed_(paired)_contig_6344	3.8	9.16	1.73	2.23	2.41	2.53	4.06
TR63208|c0_g1_i2	5.71	11.07	2.71	1.84	3.26	2.03	5.61
TR63208|c0_g1_i3	6.68	13.21	2.06	1.06	3.78	2.33	6.05
TR63208|c0_g1_i4	5.1	10.13	1.94	1.89	2.48	2.41	4.26
TR71573|c2_g1_i4	5.85	10.89	2.09	2.02	2.85	2.74	4.88
Mj_1_GCCAAT_L005_R1_001_(paired)_trimmed_(paired)_contig_8848	1.83	3.08	7.27	7.36	7.56	6.71	6.37
TR67604|c3_g1_i1	2.02	1.6	6.43	6.29	5.17	6.47	6.15
TR67604|c3_g1_i2	0.68	1.89	3.54	4.57	4.82	5.41	4.05
TR75265|c0_g1_i2	12.01	9.83	12.39	10.84	13.23	12.43	12.11
TR67471|c1_g1_i1	14.34	7.62	1.66	0.81	0.59	0.31	1.84
TR61424|c0_g1_i1	150.24	169.19	67.17	42.01	49.54	25.36	80.45
Mj_1_GCCAAT_L005_R1_001_(paired)_trimmed_(paired)_contig_4764	35.31	55	30.85	27.03	26.78	16.21	28.52
TR69031|c0_g1_i1	3.68	5.08	2.08	1.53	1.97	1.75	2.74
TR61878|c0_g1_i3	68.3	82.2	18.8	7.89	8.23	9.39	18.53
Mj_1_GCCAAT_L005_R1_001_(paired)_trimmed_(paired)_contig_6880	25.53	17.64	35.81	35.29	36.25	44.58	38.58
TR68043|c0_g1_i4	5.45	4.75	1.46	0	0.37	0.55	1.71
TR68043|c0_g1_i5	5.48	4.78	2.59	0.27	0.62	0.65	0.85
TR68043|c1_g1_i1	8.37	7.54	3.99	0.72	0.9	0.95	1.92
TR55382|c0_g1_i1	4.68	3.44	9.12	10.82	9	11.14	10.15
TR55382|c0_g2_i3	4.72	3.55	13.31	11.13	9.2	11.28	11.29
TR73624|c2_g1_i2	6.62	5.32	3.84	2.01	4.7	4.22	4.93
TR73624|c2_g1_i5	5.29	5.56	4.26	3.1	4.6	4.53	3.96
TR79757|c3_g2_i2	5.67	4.06	1.5	2.03	0.85	2.84	3.5
TR79791|c2_g2_i4	1.77	6.5	2.08	0.46	1.31	0.32	2.6
Mj_1_GCCAAT_L005_R1_001_(paired)_trimmed_(paired)_contig_6049	32.17	29.14	13.31	16.62	20.08	14.34	14.08
TR69370|c3_g2_i3	5.36	5.71	13.21	11.69	12.14	9.01	11.56
TR69370|c3_g2_i5	6.9	9.62	15.29	14.3	14.21	10.73	14.98
TR52167|c0_g1_i1	42.15	37.98	6.98	1.08	1.36	1.51	7.85
TR68886|c0_g1_i1	1237.8	3094.79	183.77	75.52	88.93	50.39	640.99
Mj_1_GCCAAT_L005_R1_001_(paired)_trimmed_(paired)_contig_13794	6.04	5.44	9.22	8.7	8.81	6.73	9.59
TR63001|c0_g1_i3	10.72	6.34	14.33	14.25	15.47	19.47	19.29
scaffold11644	37.14	33.06	58.54	53.14	57.48	47.76	58.41
TR80547|c0_g1_i1	4.48	6.36	0.5	0	0	0	0.25
TR71875|c1_g2_i6	0.3	0.1	4.01	5.42	3.76	1.34	4.75
TR68847|c0_g1_i3	9.18	9.41	3.78	3.66	9.05	4.73	1.51
TR76241|c2_g1_i1	11.22	8.31	15.09	15.87	19.51	16.57	16.36
TR76241|c2_g1_i2	6.46	4.33	8.46	10.13	11.46	11.35	10.33
TR67256|c1_g2_i1	1.96	4.17	5.64	7.45	4.94	8.18	7.02
TR68424|c0_g1_i5	8.75	19.83	5.47	2.5	3	3.13	4.48
TR69571|c0_g1_i4	12.92	29.13	7.52	2.94	3.38	2.73	4.34
TR62612|c0_g1_i1	47.09	61.64	21.38	6.08	10.45	5.07	34.21
TR62791|c0_g1_i2	48.68	58.91	23.63	6.4	9.76	5.7	34.2
TR73619|c1_g1_i2	12.72	11.97	5.38	2.28	3.04	1.49	7.04
TR77941|c0_g1_i1	16.44	11.02	9.24	2.6	1.99	2.74	6.54
TR63924|c0_g1_i2	11.62	11.92	3.62	0.84	0.9	0.08	2.15
TR65103|c0_g1_i6	4.15	6.12	1.33	0.2	0.75	0	1.49
TR65103|c0_g1_i8	9.9	9.93	2.58	0.42	1.05	0.1	2.08
TR58158|c0_g1_i2	25.87	9.72	39.85	44.14	41.39	33.94	27.55
Mj_1_GCCAAT_L005_R1_001_(paired)_trimmed_(paired)_contig_4594	43.57	40.12	5.06	2.41	3.3	1.42	6.08
TR71054|c1_g1_i1	43.49	36.37	3.89	2.85	3.02	1.4	6.32
TR51138|c0_g1_i1	135.58	98.84	19.13	14.48	16.83	11.02	21.89
scaffold11134	14.52	11.75	24.02	29.29	29.74	33.71	22.77
TR76427|c3_g2_i2	9.51	16.6	1.77	1.99	2.62	1.11	2.59
TR57069|c0_g1_i1	817.74	1030.64	256.87	11.37	15.55	12.57	269.66
Mj_1_GCCAAT_L005_R1_001_(paired)_trimmed_(paired)_contig_2464	12.16	12.14	2.65	1.9	2.78	0.66	3.98
TR67553|c0_g1_i3	12.98	10.83	1.81	1.45	2.52	0.62	4.21
TR68828|c1_g5_i1	4.36	3.43	6.2	7.94	6.66	5.41	6.84
TR70289|c0_g1_i2	9.4	9.54	7.4	5.76	9.2	9.53	8.46
TR75320|c0_g3_i6	3.91	2.61	5.54	5.22	5.88	6.61	6.06
TR64071|c0_g1_i6	1.18	1.38	5.11	4.8	2.95	3.65	3.76
TR62672|c0_g1_i2	58.03	129.57	61.21	14.81	21.9	8.43	32.98
scaffold12687	25.97	49.77	25.03	6.91	11.22	3.9	10.85
TR58905|c0_g1_i9	19.54	15.12	21.71	25.36	25.15	24.7	20.17
TR58852|c1_g1_i5	25.43	19.69	5.99	2.45	2.96	0.98	6.75
TR61736|c0_g1_i2	13.65	7.38	2.98	1.48	0.51	1.03	0.92
TR54596|c1_g1_i1	17.03	35.98	4.16	1.4	2.46	1.12	10.45
TR54596|c2_g1_i2	12.07	17	3.33	0.41	0.76	0.28	4.29
Mj_1_GCCAAT_L005_R1_001_(paired)_trimmed_(paired)_contig_2613	533.68	788.47	141.83	39.08	34.74	27.67	194.63
TR67728|c0_g4_i5	11.55	25.62	12.47	4.57	8.21	10.14	4.59
TR67728|c1_g1_i1	10.08	19.63	7.83	3.64	5.25	5.19	3.49
TR57803|c0_g1_i1	26.93	24.15	36.78	46.69	39.05	46.88	35.32
scaffold10835	28.33	24.02	36.89	46.75	36.77	44.8	34.23
TR68964|c4_g1_i5	5.18	13.44	7.88	1.27	2.87	3.73	4.41
Mj_1_GCCAAT_L005_R1_001_(paired)_trimmed_(paired)_contig_989	1.99	2.64	3.91	4.04	4.99	5.12	4.29
Mj_1_GCCAAT_L005_R1_001_(paired)_trimmed_(paired)_contig_19529	5.09	6.22	8.4	10.18	9	7.46	7.4
TR65058|c0_g1_i1	4.8	5.87	8.42	11.55	10.16	8.44	7.87
TR65058|c0_g1_i2	5.39	7.66	10.48	14.04	12.47	9.05	10.42
TR70744|c0_g1_i5	8.78	7.43	9.2	7.27	8.83	10.44	9.25
TR70744|c0_g1_i6	6.01	3.17	5.2	4.17	5.56	5.96	5.99
Mj_1_GCCAAT_L005_R1_001_(paired)_trimmed_(paired)_contig_507	30.83	69.47	16.16	1.98	2.61	3.04	14.85
TR62106|c0_g1_i1	33.96	74.5	17	1.92	3.43	3.84	16.96
TR62106|c0_g1_i2	22.94	53.62	13.11	1.78	3.27	3.46	12.31
TR62106|c0_g1_i3	24.01	53.41	13.65	1.76	2.89	4.65	11.55
TR62106|c0_g1_i4	24.78	55.1	15.69	1.66	2.24	3.4	13.52
TR77235|c0_g1_i1	1.05	8.18	0.19	0.26	0	0	0.72
Mj_1_GCCAAT_L005_R1_001_(paired)_trimmed_(paired)_contig_1275	35.87	55.81	10.08	13.51	18.53	20.21	17.53
TR63812|c0_g1_i1	44.91	67.64	14.65	13.95	20.58	25.52	20.25
Mj_1_GCCAAT_L005_R1_001_(paired)_trimmed_(paired)_contig_10636	47.33	59.46	7.02	22.68	17.19	14.11	23.09
Mj_1_GCCAAT_L005_R1_001_(paired)_trimmed_(paired)_contig_13921	7.5	4.97	8.82	4.34	9.65	9.7	10.22
TR75332|c0_g1_i1	4.73	11.05	3.18	0.18	0.51	0.38	3.22
TR75332|c0_g1_i3	8.24	11.98	2.74	1.01	3.01	0.47	4.9
TR75727|c0_g1_i2	15.76	27.47	5.9	1.13	1.87	0.99	7.37
TR59241|c1_g1_i1	7.85	5.69	16.98	18.07	18.57	17.22	17.54
TR76518|c0_g1_i2	2.81	6.01	3.05	0	0.34	0.5	0.67
TR76518|c0_g1_i4	8.19	11.17	5.96	0.52	0.24	0.9	2.61
TR76518|c0_g1_i5	4.59	8.33	3.9	0.46	0.48	0.49	1.55
scaffold1083	4.45	5.22	1.67	0.32	0.6	0.22	1
TR48642|c0_g1_i1	21.31	26.89	58.83	49.4	61.44	47.67	43.91
Mj_1_GCCAAT_L005_R1_001_(paired)_trimmed_(paired)_contig_10804	11.19	8.98	3.14	2.94	5.25	3.38	4.62
TR73231|c0_g1_i1	16.62	10.97	4.55	4.75	6.3	5.72	6.95
scaffold14075	8.9	6.52	2.41	2.66	3.51	2.98	4.14
TR67584|c0_g1_i1	49.91	99.86	12.42	5.15	7.63	5.32	21.31
TR67584|c0_g1_i3	39.73	80.34	8.87	4.78	8.16	4.56	17.23
scaffold11935	20.69	48.47	6.33	5.02	4.03	2.73	10.15
scaffold11936	15.09	36.04	4.76	2.23	2.97	2.39	7.66
TR48258|c0_g1_i1	3.38	5.45	2.73	2	2.83	1.17	3.12
Mj_1_GCCAAT_L005_R1_001_(paired)_trimmed_(paired)_contig_1106	75.73	77.44	18.66	5.31	7.1	3.51	30.54
Mj_1_GCCAAT_L005_R1_001_(paired)_trimmed_(paired)_contig_4097	100.83	113.01	33.35	6.4	13.38	8.77	42.84
TR68510|c0_g1_i1	176.42	180.4	50.54	13.41	18.63	10.48	79.96
Mj_1_GCCAAT_L005_R1_001_(paired)_trimmed_(paired)_contig_256	41.57	35.09	14.92	4.28	4.96	6.58	10.95
TR62597|c0_g1_i2	38.76	17.71	30.71	48.24	41.08	41.19	30.35
TR72195|c0_g1_i4	19.24	11.04	25.01	24.99	28.55	30.51	28.32
Mj_1_GCCAAT_L005_R1_001_(paired)_trimmed_(paired)_contig_1160	14.36	18.28	0.88	1.38	1.15	0.98	2.03
TR73623|c0_g1_i4	16.18	22.43	0.88	0.81	1.48	0.36	2.29
TR75644|c0_g1_i3	19.32	25.04	1.19	1.13	1.54	0.43	2.68
TR75644|c0_g1_i4	14.43	19.78	1.09	0.8	1.17	0.31	2.63
TR75644|c0_g1_i5	15.15	19.57	1.07	0.68	1.1	0.37	2.07
Mj_1_GCCAAT_L005_R1_001_(paired)_trimmed_(paired)_contig_25888	6.41	7.49	2.68	1.64	4.65	2.07	2.14
TR51382|c0_g1_i1	6.36	5.21	2	1.71	4.71	2	1.77
TR61027|c0_g1_i1	6.04	7.37	14.38	12.65	10.54	12.57	15.32
TR79027|c0_g1_i2	4.12	3.94	9.89	9.31	10.66	9.68	9.07
Mj_1_GCCAAT_L005_R1_001_(paired)_trimmed_(paired)_contig_13159	19.57	22.98	2.74	1.96	2.05	0.61	3.37
TR50698|c0_g1_i1	8.39	13.07	0.15	1.37	0.74	0.14	0.85
TR50698|c0_g1_i2	6.97	7.98	0.45	0.6	0.57	0.14	0.75
TR51779|c0_g1_i1	8.19	10.77	1.02	0.59	0.74	0.28	0.98
TR51779|c0_g1_i2	7.14	10.09	0.45	1.01	1.34	0.14	1.63
TR67827|c0_g3_i4	2.6	0.65	4.84	4.57	4.1	4.11	5.27
TR62203|c0_g1_i1	20.77	25.07	10	2.28	1.39	1.31	2.08
TR63257|c0_g1_i1	15.54	20.32	9.04	1.63	1.41	1.05	1.85
Mj_1_GCCAAT_L005_R1_001_(paired)_trimmed_(paired)_contig_9265	12.45	11.65	20.09	22.17	17.23	21.92	16.94
TR78230|c1_g6_i3	4.01	2.7	7.92	8.25	9.72	6.56	6.52
TR54417|c0_g1_i1	29.14	31.54	17.6	21.69	22.94	18.88	23.01
TR59466|c0_g1_i2	7.48	5.64	2.52	1.55	1.75	2.55	3.51
TR59466|c0_g1_i3	9.58	6.09	3.47	2.17	1.87	3.04	4.37
TR46877|c0_g1_i1	155.43	88.38	270.63	184.78	263.37	256.79	179.12
TR71708|c0_g1_i2	4.61	2.49	3.61	5.75	6.23	5.13	4.9
TR71234|c0_g1_i3	5.72	9.14	4.96	3.46	3.56	2.86	5.2
TR73647|c0_g2_i5	7.15	4.91	7.9	9.63	9.63	10.19	8.52
Mj_1_GCCAAT_L005_R1_001_(paired)_trimmed_(paired)_contig_6079	12.6	17.77	6.27	7.09	8.16	9	6.9
TR74931|c0_g1_i4	10.62	15.03	5.2	5.7	7.39	8.19	6
scaffold13350	9.23	14.45	4.86	5.34	6.04	7.62	5.85
Mj_1_GCCAAT_L005_R1_001_(paired)_trimmed_(paired)_contig_1067	50.26	60.87	15.15	8.04	3.72	3.93	10.73
TR68310|c0_g1_i2	94.93	112.3	21.08	13.85	7.3	8.13	20.28
TR68310|c0_g1_i3	83.53	110.7	21.88	14	7.76	8.99	19.06
TR67743|c0_g1_i2	69.69	84.96	17.88	9.96	5.62	5.78	15.71
TR59641|c0_g1_i1	10.11	5.51	12.63	18.71	13.92	17.23	13.55
Mj_1_GCCAAT_L005_R1_001_(paired)_trimmed_(paired)_contig_6356	8.27	11.48	3.55	0.14	0.52	0.19	5.1
TR48616|c1_g1_i1	3.93	5.35	2.19	0	0	0	2.04
TR53076|c0_g1_i3	6.69	8.41	4.27	0.3	0.29	0.42	3.2
TR53945|c0_g1_i1	8.3	7.58	3.26	0.19	0.54	0.13	3.56
TR53945|c0_g1_i2	7.42	8.35	2.72	0.19	0.36	0.27	1.56
TR54486|c0_g1_i3	15.41	11.13	17.74	16.75	21.73	18.28	16.66
TR55904|c0_g1_i4	24.59	14.66	30.13	33.91	30.11	29.97	26.37
TR55904|c0_g1_i5	21.97	14.6	25.86	26.56	34.14	26.13	22.26
TR48790|c0_g1_i2	2.87	23.39	0.9	0.3	1.71	0	4.14
TR56200|c0_g1_i1	116.6	92.46	68.3	65.02	83.91	61.49	71.92
TR56200|c0_g1_i2	107.58	82.73	62.28	61.54	64.99	51.88	68.68
Mj_1_GCCAAT_L005_R1_001_(paired)_trimmed_(paired)_contig_1632	33.99	83.72	11.71	5.78	5.02	3	12.7
TR57717|c0_g1_i1	101.53	238.25	30.81	11.07	16.15	9.41	39.59
TR59270|c1_g1_i3	5.47	4.78	2.7	0.78	1.15	0.43	2.27
TR57912|c0_g1_i1	184.67	160.25	77.17	34.32	84.72	28.64	67.05
TR75552|c0_g1_i3	11.54	8.39	5.33	4.33	6.43	5.51	5.62
TR77330|c1_g1_i2	14.22	10.1	3.88	3.7	4.28	5.85	4.68
TR43643|c0_g1_i1	26.85	18.16	44.71	32.21	49.22	46.1	35.14
Mj_1_GCCAAT_L005_R1_001_(paired)_trimmed_(paired)_contig_4087	6.12	6.54	3.08	1.89	2.79	2.74	3.55
TR64201|c0_g1_i2	5.79	5.69	2.38	1.17	2.34	2.35	3.54
TR64201|c0_g1_i3	5.47	5.59	1.8	1.62	2.48	2.41	3.14
TR64201|c0_g1_i5	5.13	5.56	2.49	1.44	3.12	2.15	3.43
TR64832|c0_g1_i3	6.53	6.21	3	2.42	3.71	2.48	4.26
TR64832|c0_g1_i5	5.26	6.48	2.55	1.6	2.84	2.24	3.73
TR46701|c0_g1_i1	90.4	83.77	14.83	10.11	18.5	8.02	12.79
TR53298|c0_g1_i1	15.47	10.84	18.71	20.53	22.26	20.6	18.26
Mj_1_GCCAAT_L005_R1_001_(paired)_trimmed_(paired)_contig_98	321.93	997.84	188.35	174.67	188.16	269.86	13.25
TR53142|c0_g1_i1	459.34	1414.32	256.46	246.29	250.13	366.23	17.84
Mj_1_GCCAAT_L005_R1_001_(paired)_trimmed_(paired)_contig_3179	21.05	13	2.96	1.14	1.07	1.46	2.83
TR59664|c0_g1_i1	39.71	27.02	4.17	2.01	0.95	1.55	3.99
TR68454|c0_g1_i1	2.64	1.04	6.22	5.18	4.65	3.8	6.44
TR68298|c0_g1_i1	18.2	31.27	6.29	6.42	5.77	3.66	5.56
TR68298|c0_g1_i2	18.05	33.39	7.23	3.82	4.46	2.67	4.17
TR75051|c0_g2_i2	12.72	19.96	1.04	0.65	1.93	0.98	1.6
scaffold10637	8.7	15.16	0.2	0.27	0.51	0	0.84
TR74863|c0_g1_i2	7.32	7.55	1.33	2.24	0.75	2.03	2.48
TR57594|c0_g1_i1	118.01	96.46	21.04	9.34	13.85	7.5	25.9
scaffold12292	37.48	27.4	6.71	2.16	3.37	1.67	8.19
scaffold12293	29.19	22.41	4.87	2.03	2.95	1.01	7.55
TR50762|c0_g1_i1	21.73	16.05	40.79	36.4	44.65	40.19	32.33
Mj_1_GCCAAT_L005_R1_001_(paired)_trimmed_(paired)_contig_9680	5.3	5.8	0.89	0	0	0	0
TR67599|c0_g2_i2	5.05	6.5	2.4	0	0	0	0.39
TR67599|c0_g2_i4	7.25	7.37	1.85	0	0	0	0.14
TR67599|c0_g2_i5	5.68	6.95	1.76	0.06	0	0.04	0.32
TR67616|c2_g1_i5	4.7	6.01	1.19	0	0	0	0.29
TR59378|c0_g1_i1	11.18	6.65	12.34	14.98	14.99	15.1	12.94
Mj_1_GCCAAT_L005_R1_001_(paired)_trimmed_(paired)_contig_34786	2.71	6.18	0.49	0.33	0.31	0.92	1.23
TR70929|c0_g1_i2	3.16	7.17	0.13	0.52	0.16	0.85	1.18
TR74903|c0_g4_i1	3.88	9.09	0.25	0.68	0	0.72	1.27
TR79037|c2_g1_i1	4.22	10.12	0.26	0.93	2.19	2.27	2.37
TR79037|c2_g1_i5	2.45	6.54	0.38	0.52	2.19	1.45	1.13
TR48843|c0_g1_i1	14.88	8.6	1.63	3.57	3.62	3.07	4.26
TR60281|c1_g1_i2	32.2	20.93	4.46	3.56	3.36	2.36	5.04
TR60281|c1_g1_i4	68.26	40.95	10.65	6.08	7.27	3.22	9.39
TR60281|c1_g1_i5	27.35	16.11	3.32	3	3.3	1.26	4.34
TR63636|c0_g2_i2	13.52	14.3	22.49	23.64	18.16	19.99	25.31
Mj_1_GCCAAT_L005_R1_001_(paired)_trimmed_(paired)_contig_6650	6.7	4.02	5.97	7.98	8.71	9.16	8.53
TR69317|c0_g1_i4	9.82	5.78	9.66	10.29	12.32	11.17	10.15
TR2769|c0_g1_i1	424.56	918.95	417.94	10.81	7.45	8.44	340.96
Mj_1_GCCAAT_L005_R1_001_(paired)_trimmed_(paired)_contig_5882	9.32	21.37	8.42	6.17	7.75	10.54	9.17
Mj_1_GCCAAT_L005_R1_001_(paired)_trimmed_(paired)_contig_3914	14.05	9.64	2.63	1.52	1.12	0.36	1.16
TR43593|c0_g1_i1	79.23	66.25	10.62	7.57	7.14	4.15	9.02
TR44639|c0_g1_i1	58.59	43.95	9.92	5.22	6.56	3.04	5.77
Mj_1_GCCAAT_L005_R1_001_(paired)_trimmed_(paired)_contig_26682	4.66	4.29	6.81	7.3	7.24	6.27	6.99
Mj_1_GCCAAT_L005_R1_001_(paired)_trimmed_(paired)_contig_5487	70.25	53.28	12	7.37	15.18	4.9	11.56
TR52898|c0_g1_i1	235.28	185.32	39.7	24.33	40.33	22.12	43.22
Mj_1_GCCAAT_L005_R1_001_(paired)_trimmed_(paired)_contig_20726	11.58	28.75	4.93	9.78	10.02	1.29	12.49
TR74461|c0_g1_i1	7.51	8.72	0.18	0.12	0.45	0.17	1.56
TR74062|c0_g3_i2	10.53	10.27	21.86	22.7	25.45	20.13	25.43
TR60209|c0_g1_i1	149.49	124.15	27.91	10.41	11.03	7.5	24.23
TR79267|c1_g3_i4	6.18	11.59	5.03	3.31	5.53	5.57	7.05
TR71511|c0_g2_i1	16.78	14.57	26.77	33.55	24.57	33.57	24.12
TR76545|c0_g1_i2	25.7	16.48	6.1	4.7	4.96	4.27	5.59
TR76792|c0_g1_i2	13.24	10.7	4.15	3.57	4.61	3.57	4.17
TR70128|c0_g1_i1	5.76	6.12	1.74	1	1.28	0.9	2.65
TR73487|c1_g1_i2	6.48	8.01	2.4	0.83	0.94	0.64	2.79
scaffold11291	6.14	6.18	2.23	1.47	1.08	0.74	2.12
TR74835|c3_g3_i1	21.99	73.05	14.13	2.93	3.16	2.18	7.13
TR74835|c3_g3_i2	11.59	37.85	9.29	2.01	3.25	2.72	6.69
TR74835|c3_g3_i6	20.87	78.62	13.44	4.81	3.2	5.14	9.67
TR74835|c3_g3_i7	13.11	40.59	9.3	1.89	2.33	1.58	5.1
scaffold11917	10.79	35.73	8.58	1.18	1.3	1.04	4.16
scaffold11918	10.87	38.19	6.12	1.24	0.9	0.67	4.84
Mj_1_GCCAAT_L005_R1_001_(paired)_trimmed_(paired)_contig_15190	57.53	76.37	4.63	1.1	2.08	1.54	8.68
TR62685|c0_g1_i4	7.6	5.79	2.98	1.61	1.41	1.45	1.79
TR65189|c0_g1_i1	7.61	5.69	2.76	2.38	0.78	1.81	2.51
Mj_1_GCCAAT_L005_R1_001_(paired)_trimmed_(paired)_contig_11358	2.62	3.12	6.63	7.68	6.12	8.92	5.46
TR48284|c0_g1_i1	19.67	19.29	45.84	41.3	40.53	26.35	48.91
TR59213|c0_g1_i1	27.42	19.03	7.93	6.46	10.63	4.52	9.44
Mj_1_GCCAAT_L005_R1_001_(paired)_trimmed_(paired)_contig_19655	16.3	11.9	17.15	15.62	19.81	18.41	16.92
Mj_1_GCCAAT_L005_R1_001_(paired)_trimmed_(paired)_contig_17070	8.14	10.24	4.37	3.57	4.24	2.43	4.43
Mj_1_GCCAAT_L005_R1_001_(paired)_trimmed_(paired)_contig_536	850.66	1110.23	233.27	65.41	93.06	49.31	369.89
TR56095|c0_g1_i1	637	819.77	180.08	47.6	61.56	36.79	263.01
TR56095|c0_g1_i2	658.26	862.33	188.74	43.64	57.47	34.68	265.97
TR67669|c0_g1_i1	14.87	6.55	17.26	18.46	20.55	19.8	16.3
TR67669|c0_g1_i2	11.44	6.94	15.34	16.2	17.34	18.23	12.28
TR50897|c0_g1_i1	135.75	179.41	30.38	7.93	10.92	7.46	31.86
scaffold13553	3.78	6.18	2.26	2.64	3.49	2.88	2.23
TR77785|c0_g1_i1	6.23	4.48	2.36	2.47	3.32	3.94	4.38
TR67303|c1_g1_i7	4.6	5.34	0	0	0.36	0	2.14
TR76429|c0_g2_i5	5.3	3.04	0.75	0.34	0.95	0.23	2.71
TR74985|c0_g1_i9	5.83	2.52	0	0.89	0.28	0.42	0.93
Mj_1_GCCAAT_L005_R1_001_(paired)_trimmed_(paired)_contig_7704	5.19	7.97	3.06	0.82	2.32	4.3	3.32
TR79770|c1_g3_i7	5.21	3.37	2.57	0.8	2.01	1.12	2.49
Mj_1_GCCAAT_L005_R1_001_(paired)_trimmed_(paired)_contig_24929	6.94	8.29	11.82	12.02	9.62	10.14	10.83
TR75178|c1_g1_i1	5.97	6.17	11.86	11.61	9.41	9.27	9.04
TR74303|c2_g1_i2	20.03	26.82	6.36	1.79	6.07	1.63	7
TR74322|c0_g2_i14	3.76	5.33	0.98	0.27	0.25	0.09	2.06
TR62843|c1_g1_i2	10.55	7.6	1.67	2.84	3.3	2.75	2.39
TR76274|c0_g1_i1	15.01	11.81	3.86	4.68	5.65	4.85	4.25
TR76274|c0_g1_i3	13.77	11.05	4.13	4.01	5.15	4.65	4.2
TR72218|c0_g1_i3	6	5.02	3.34	3.57	3.56	2.87	4.56
Mj_1_GCCAAT_L005_R1_001_(paired)_trimmed_(paired)_contig_24963	24.29	18.34	45.83	47.29	41.8	52.26	36.97
Mj_1_GCCAAT_L005_R1_001_(paired)_trimmed_(paired)_contig_2505	19.57	32.33	16.34	2.61	2.96	0.49	12.48
TR60032|c0_g1_i1	28.62	50.92	26.57	3.73	4.58	0.55	20.65
TR70467|c0_g2_i1	31.45	40.99	22.74	1.65	3.75	0.34	16.44
TR79666|c3_g2_i1	27.07	38.64	0	0.8	1.04	0.21	19.66
scaffold11790	17.88	16.26	0.2	0.55	4.67	0	10.09
Mj_1_GCCAAT_L005_R1_001_(paired)_trimmed_(paired)_contig_7534	3.63	6.8	2.24	1.78	2.45	0.78	4
TR78140|c2_g2_i2	7.48	5.22	2.19	4.41	4.23	3.96	1.97
Mj_1_GCCAAT_L005_R1_001_(paired)_trimmed_(paired)_contig_1051	38.43	85.57	12.01	2.03	2.18	1.93	29.92
TR67315|c5_g3_i1	61.77	111.18	20.28	4.01	4.66	3.97	46.66
Mj_1_GCCAAT_L005_R1_001_(paired)_trimmed_(paired)_contig_193	9.19	11.52	15.36	15.28	13.52	16.37	13.4
C954090	4.96	7.31	0.13	0	0	0	1.11
TR65651|c2_g1_i2	21.81	21.53	5.68	2.31	3.5	1.7	9.46
TR65651|c2_g1_i3	20.4	19.85	4.37	1.97	2.65	1.57	8.11
Mj_1_GCCAAT_L005_R1_001_(paired)_trimmed_(paired)_contig_5775	11.23	6.43	2.27	2.04	1.92	1.78	2.85
TR73176|c0_g1_i1	6.38	7.24	2.39	0.46	2.15	2.55	3.42
TR66148|c0_g1_i5	2.9	3.46	6.9	7.18	5.47	4.34	5.61
TR66711|c0_g1_i2	3	2.72	6.71	7.85	5.16	2.66	3.84
TR61536|c1_g1_i2	12.87	9.57	15.39	20.26	20.43	21.54	17.03
TR72306|c0_g1_i3	72.92	70.08	40.3	29.16	32.99	28.77	22.87
TR30961|c0_g1_i1	5.11	3.56	1.79	0.12	0.23	0.08	0.6
C962152	1.02	10.9	0	0.4	0.38	0.38	4.61
Mj_1_GCCAAT_L005_R1_001_(paired)_trimmed_(paired)_contig_949	10.55	7.88	4.33	2.79	5.31	3.29	4.28
TR77216|c2_g5_i2	9.29	7.39	5.04	4.37	6.31	5.76	5.75
TR55342|c0_g1_i1	16.5	12.24	24.01	26.19	25.22	22.38	19.43
scaffold13777	5.1	3.8	3.6	2.16	2.81	2.65	3.11
TR79067|c3_g3_i10	23.61	17.86	12.84	15.15	13.65	13.32	11.92
TR69586|c0_g1_i1	36.35	51.6	10.34	3.89	4.01	4.77	10.18
TR70201|c0_g1_i2	20.5	31.97	8.33	2.8	3.37	3.35	7.93
TR57693|c0_g1_i3	4.99	6.34	8.74	8.28	9.3	9.74	11.27
TR66073|c0_g1_i3	0.09	11.22	0.21	0.58	1	0.1	0.18
TR66073|c0_g1_i5	0.15	10.55	0.14	0.59	0.42	0.14	0.21
TR70718|c0_g1_i1	0.35	10.75	0.14	0.56	0.66	0	0.14
TR70718|c0_g1_i3	0.08	9.92	0.06	0.48	0.62	0.09	0.14
TR70718|c0_g1_i4	0.2	9.08	0.09	0.41	0.88	0.09	0.3
TR70718|c0_g1_i5	0.21	5.21	0.49	0	0.31	0	0.21
TR70718|c0_g1_i6	0.1	5.47	0	0.32	0	0.11	0
TR75931|c0_g1_i1	7.79	7.05	11.81	12.91	9.36	13.28	13.55
Mj_1_GCCAAT_L005_R1_001_(paired)_trimmed_(paired)_contig_8426	9.73	11.4	21.76	25.87	22.53	29.24	24.29
TR57810|c0_g1_i2	8.33	9.74	19.6	26.63	22.89	26.77	19.81
TR53449|c0_g1_i1	179.32	766.1	2.63	0.99	0.39	3.01	12.94
Mj_1_GCCAAT_L005_R1_001_(paired)_trimmed_(paired)_contig_21077	3.4	4.75	5.71	6.63	6.15	5.03	6.1
TR73895|c1_g1_i6	7.05	9.48	14.5	18.07	20.26	16.52	18.9
TR56901|c0_g1_i1	21.16	36	4.26	0.96	3.82	1.27	6.62
TR56901|c0_g1_i2	15.49	24.38	4.96	2.17	3.57	1.13	7.04
TR56901|c0_g1_i3	13.37	22.26	4.6	2.14	2.63	1.63	6.52
TR56901|c0_g1_i4	13.2	21.94	4.54	1.6	3.1	2.18	5.38
TR64697|c0_g1_i1	16.81	10.83	12.84	19.55	14.89	16.85	17.08
Mj_1_GCCAAT_L005_R1_001_(paired)_trimmed_(paired)_contig_13563	4.62	3.11	6.32	7.49	8.52	7.22	6.56
TR46334|c0_g1_i1	1285.76	1582.74	307.79	62.9	75.96	40.62	463.93
TR38784|c0_g1_i2	3.3	5.72	0.73	0	0	0	1.62
TR41436|c0_g1_i2	3.21	6.15	1.01	0	0.32	0	1.48
TR64528|c0_g2_i1	29.71	43.62	15.83	6.23	6.15	3.41	9.91
TR64528|c0_g2_i2	30.87	42.17	13.94	4.05	5.68	3.94	9.44
TR65437|c0_g1_i7	9.98	5.92	1.91	1.14	1.95	1.16	3.07
TR60900|c0_g2_i6	4.05	3.95	5.96	6.21	5.86	6.27	6.21
Mj_1_GCCAAT_L005_R1_001_(paired)_trimmed_(paired)_contig_3462	11.61	9.86	3.82	2.4	2.06	1.84	2.58
scaffold14350	13.35	10.62	3.9	1.6	2.17	2.24	2.89
TR73967|c1_g2_i6	7.89	4.03	2.25	1.14	3.05	0.47	0.89
Mj_1_GCCAAT_L005_R1_001_(paired)_trimmed_(paired)_contig_24277	5.02	2.95	6.24	7.93	9.53	8.61	7.95
TR79673|c0_g1_i6	4.67	3.56	5.36	5.52	5.69	6.06	6.02
TR79855|c1_g1_i4	5.03	3.93	5.89	4.06	5.44	6.09	6.39
TR55303|c2_g1_i1	194.6	154.62	34.22	31.64	19.99	24.31	40.96
TR55548|c1_g2_i1	20.22	36.19	6.26	8.29	7.82	8.74	13
TR55548|c1_g2_i2	10.49	18.06	4.15	4.33	3.78	2.58	5.87
TR58736|c0_g1_i2	2.61	7.91	1.05	0.39	0.37	0.18	3.22
TR58736|c0_g1_i4	3.3	8.68	0.83	0.5	0.47	0	3.11
TR59544|c0_g1_i1	3.96	6.98	0.72	0.16	0.3	0.11	2.01
TR59544|c0_g1_i4	4.36	17.12	1.66	0.2	0.19	0.14	3.79
TR59544|c0_g1_i8	4.33	10.13	1.64	0.44	0.63	0	2.89
TR57690|c0_g4_i10	8.93	9.54	1.57	0	0.4	0.15	0.53
TR57690|c0_g4_i2	8.98	14.36	1.92	0	0.73	0.54	0.64
TR57690|c0_g4_i5	5.82	5.29	1.84	0	0.42	0	0.42
TR57690|c0_g4_i7	4.98	6.33	0.65	0	0	0	0.55
TR65456|c0_g1_i2	31.86	22.74	10.98	3.42	3.86	3.03	12.88
TR65650|c1_g1_i1	30.43	21.08	10	3.35	5.24	2.83	8.68
TR65650|c1_g1_i2	20.52	12.62	7.43	1.74	4.55	3.78	6.59
TR74474|c0_g1_i3	3.98	2.87	5.56	4.95	5.29	5.6	5.9
TR74505|c0_g2_i5	4.78	4.9	8.45	9.88	9.67	8.38	7.32
TR74505|c0_g2_i6	2.7	3.81	6.62	8.25	6.48	6.02	5.23
TR75273|c0_g1_i1	6.19	6.54	12.96	16.95	11.69	9.27	10.36
TR75273|c0_g1_i3	4.87	5.83	7.49	10.38	6.84	6.56	8.22
TR75273|c0_g1_i4	6.6	6.05	11.94	14.44	7.43	8.91	8.55
TR70438|c0_g1_i2	6.71	5.01	8.49	10.79	8.52	10.16	7.63
TR43950|c0_g1_i1	9.41	10.56	2.98	1.44	2.43	0.8	3.39
TR62649|c0_g1_i1	3.41	5.67	0.21	0.57	0	0	0.71
TR62649|c0_g1_i5	6.45	5.03	1	0	0.25	0	1.5
TR65745|c1_g2_i1	5.07	6.3	0.4	0	0	0	1
TR77912|c0_g3_i3	12.84	16.82	1.75	0	0.37	0.82	1.46
TR77912|c0_g3_i4	8.23	10.44	2.25	0	0.57	0.42	3.02
Mj_1_GCCAAT_L005_R1_001_(paired)_trimmed_(paired)_contig_2728	67.85	156.19	4.94	0.93	0.7	2.46	21.4
TR46979|c0_g1_i1	96.64	219.97	8.4	0.77	1.45	1.61	34.85
TR47677|c0_g1_i1	107.29	240.23	7	0.98	0.56	2.48	35.82
scaffold14259	103.19	234.39	9.99	1.22	0.46	2.05	35.28
TR70747|c0_g1_i2	5.47	5.77	10.71	15.76	16.15	10.96	13.62
TR78294|c1_g1_i2	4.36	3.57	7.52	9.86	10.68	8.04	9.21
TR55553|c0_g1_i1	75.05	49.63	88.15	108.39	77.5	108.07	86.68
Mj_1_GCCAAT_L005_R1_001_(paired)_trimmed_(paired)_contig_17463	7.65	11.02	2.43	2.79	3.06	4.86	2.89
TR55628|c0_g1_i1	27.39	37.08	11.37	3.58	7.88	7.73	13.15
TR55628|c0_g1_i3	12.94	16.57	7.41	3.8	5.63	7.28	6.06
C949810	3.69	7.04	2.7	1.21	1.91	0.85	2.51
TR79478|c1_g1_i4	3.46	6.94	0.95	1.1	1.38	1.03	1.25
TR79485|c1_g1_i1	4.02	5.61	0.84	0.71	1.07	1.09	1.41
TR79485|c1_g1_i4	2.08	5.46	1.05	0	0.3	0.44	0.59
TR79485|c1_g8_i2	3.88	6.27	1.8	0.56	0.53	1.18	1.74
TR79485|c1_g8_i3	3.92	8.68	2.21	0.25	1.64	0.7	1.55
TR58184|c0_g1_i1	7.59	5.15	3.09	3.24	2.84	3.73	4.6
TR65405|c1_g2_i1	3.46	3.92	5.74	6.34	5.77	6.08	6.04
TR65405|c1_g2_i3	4.49	3.55	7.06	6.71	6.63	5.81	6.99
TR66324|c0_g1_i1	2.31	1.42	4.65	4.97	5.42	5.12	5.52
TR66324|c0_g1_i3	5.46	3.48	7.28	9.5	9.8	7.78	8.67
TR70171|c1_g1_i2	15.28	17.64	9.63	8.41	10.05	7.77	13.44
TR76651|c0_g1_i10	16.55	10.09	16.05	19.67	14.59	17.85	17.8
TR50886|c0_g1_i1	24.78	21.66	17.39	14.76	14.42	11.98	17.52
scaffold11422	17.23	13.11	10.69	7.89	11.23	8.03	10.91
Mj_1_GCCAAT_L005_R1_001_(paired)_trimmed_(paired)_contig_19051	3.1	2.29	9.05	8.36	8.55	8.64	7.22
TR58625|c1_g2_i1	6.59	4.59	19.51	20.35	18.09	17.29	16.16
TR63768|c1_g1_i5	6.15	4.37	17.28	17.02	14.97	16.44	13.39
TR72422|c6_g1_i2	14.25	16.45	4.4	0.63	0.96	0.53	3.3
TR39712|c0_g1_i1	880.3	1088.61	318.97	54.18	112.07	72.65	396.13
TR76804|c3_g1_i7	2.01	5.02	3.27	1.23	1.62	1.37	3.05
TR57860|c1_g1_i2	18.92	29.77	13.72	6.54	6.73	4.89	14.06
TR57860|c1_g1_i4	15.07	20.77	8.62	5.03	6.87	2.88	14.14
TR57860|c1_g1_i8	16.13	19.23	9.75	4.53	5.44	3.46	12.02
TR78075|c0_g2_i2	9.44	8.87	4.01	3.68	5.55	3.26	3.81
TR78075|c0_g3_i2	6.98	4.75	1.37	2.29	2.16	2.56	2.86
TR78206|c0_g10_i1	7.48	6.4	1.16	1.87	4.99	2.62	2.52
TR74847|c1_g1_i1	5.97	6.09	8.96	10.47	8.89	9.9	8.28
TR74847|c1_g1_i2	3.99	4.14	6.08	7.64	6.66	6.36	7.7
Mj_1_GCCAAT_L005_R1_001_(paired)_trimmed_(paired)_contig_15242	1.82	3.49	5.63	5.05	4.41	4.28	4.71
TR70994|c1_g1_i2	8.53	6.47	12.92	13.8	12.34	9.95	12.3
Mj_1_GCCAAT_L005_R1_001_(paired)_trimmed_(paired)_contig_3060	7.98	8.06	2.85	1.8	1.69	1.44	3.34
TR47045|c0_g2_i1	10.57	9.19	4.09	3.5	2.12	2.45	5.91
TR56791|c0_g1_i1	19.72	18.21	6.58	5.98	4.42	3.96	10.64
Mj_1_GCCAAT_L005_R1_001_(paired)_trimmed_(paired)_contig_11444	6.63	3.49	1.88	0.73	3.77	0.64	2.14
TR77169|c1_g3_i3	4.21	7.28	12.06	14.85	11.9	18.36	12.94
TR58330|c0_g1_i2	3.95	5.3	6.66	6.57	7.68	6.3	6.3
TR51283|c0_g1_i1	5.91	15.52	6.96	0.41	0	0.57	1.01
TR52151|c0_g1_i1	7.08	13.79	8.34	0	0.34	0.25	2.25
Mj_1_GCCAAT_L005_R1_001_(paired)_trimmed_(paired)_contig_17552	13.98	11.27	26.64	29.2	25.99	24.65	27.95
TR67652|c0_g1_i1	23.67	19.06	40.08	45.86	38.49	37.98	45.51
TR69938|c0_g1_i2	1.5	2.71	5.12	4.26	5.02	3.17	4.05
TR47900|c0_g1_i1	30.25	33.89	0.96	6.01	2.3	0.23	2.72
TR76333|c1_g3_i1	7.18	5.45	2.52	3.18	2.02	1.73	2.66
TR77573|c0_g1_i13	6.22	5.28	1.83	3.83	2.32	1.15	2.38
TR70068|c1_g2_i4	5.27	2.24	5.86	5.81	6.13	6.17	5.19
Mj_1_GCCAAT_L005_R1_001_(paired)_trimmed_(paired)_contig_20904	14.12	28.23	12.55	10	13.26	10.79	8.21
TR78067|c1_g1_i3	22.08	19.52	15.03	17.07	15.26	17.34	18.73
scaffold11989	31.05	40.4	22.24	21.85	28.26	19.56	31.93
Mj_1_GCCAAT_L005_R1_001_(paired)_trimmed_(paired)_contig_17001	6.36	39.04	7.7	0.14	0.14	0.4	0.63
TR50292|c0_g1_i1	12.19	89.4	15.14	0.45	0.14	0.42	1.79
TR68021|c0_g1_i1	136.29	130.75	15.6	0.28	0	1.5	21.49
Mj_1_GCCAAT_L005_R1_001_(paired)_trimmed_(paired)_contig_3523	31.67	43.57	6.04	2.85	3.91	1.54	6.68
TR55635|c0_g1_i1	38.1	50.56	6.26	3.09	5.18	2.64	6.75
TR55635|c0_g1_i2	42.26	52.92	7.75	3.98	5.83	2.13	8.46
TR52782|c0_g1_i4	29.96	16.17	6.03	2.22	3.74	2.86	6.15
TR67904|c0_g1_i4	3.41	6.76	1.29	0.64	0.87	1.16	2.46
TR67904|c0_g1_i6	3.05	5.23	1.41	0.87	0.9	1.09	1.94
Mj_1_GCCAAT_L005_R1_001_(paired)_trimmed_(paired)_contig_11567	8.59	9.79	15.28	14.48	13.64	18.23	16.38
TR54240|c0_g1_i1	229.77	102.83	297.96	234.39	317.51	198.1	208.17
TR62530|c0_g1_i2	34.38	18.96	7.4	2.02	3.59	2.94	14.27
TR64392|c0_g2_i2	21.31	16.58	5.83	11.38	9.13	13.01	9.72
TR67185|c0_g1_i3	1.48	1.54	3.65	5.14	5.04	3.14	4.65
Mj_1_GCCAAT_L005_R1_001_(paired)_trimmed_(paired)_contig_1303	3.64	5.57	1.8	1.18	1.08	1.63	3.38
TR72653|c0_g1_i2	4.48	7.94	1.5	0.45	0.5	2.21	3.31
TR72653|c0_g1_i3	4.82	7.56	1.11	1.18	0.91	2.37	3
TR72653|c0_g1_i5	3.55	6.78	0.96	0.96	1.23	2.14	2.77
TR72653|c0_g1_i6	4.22	6.95	1.2	0.3	0.51	2.36	2.91
scaffold12867	3.71	5.1	1.41	1.26	0.56	1.38	1.86
scaffold12868	2.65	5.32	0.79	0.67	0.82	1.97	1.58
Mj_1_GCCAAT_L005_R1_001_(paired)_trimmed_(paired)_contig_4863	10.03	8.82	1.22	0	0.21	0.39	3.62
TR52052|c0_g1_i1	32.29	23.82	2.95	0.53	0.5	0.19	10.72
TR71725|c0_g1_i1	21.07	24.4	13.07	5.1	7.63	3.22	13.39
Mj_1_GCCAAT_L005_R1_001_(paired)_trimmed_(paired)_contig_5401	12.46	17.5	1.69	1.51	2.07	1.86	2.94
TR75779|c4_g3_i6	8.58	9.85	5.21	4.89	6.02	5.96	5.95
TR75779|c4_g3_i7	9.91	12.53	1.82	1.61	1.87	1.92	2.76
TR77705|c2_g6_i2	10.6	15.05	1.47	1.38	2.27	1.11	2.51
TR77705|c2_g6_i4	8.78	11.83	1.09	1.18	1.78	0.99	1.9
TR77705|c2_g6_i6	8.45	12.4	1.52	1.1	2.34	1.41	2.16
TR63650|c0_g2_i5	5.86	5.1	1.27	0.65	1.69	1.16	2.14
TR63988|c0_g5_i2	7.98	5.2	1.54	0.88	2.49	1.34	3.62
TR63988|c0_g5_i4	8.28	6.22	1.56	1.14	1.84	1.2	2.73
TR64329|c0_g1_i1	11.24	13.39	7.28	4.32	3.23	2.61	6.38
TR64329|c0_g1_i2	16.65	15.86	9.42	3.62	4.64	3.65	7.01
TR78250|c0_g1_i3	3.26	5.05	3.36	3.73	2.44	3.06	3.62
Mj_1_GCCAAT_L005_R1_001_(paired)_trimmed_(paired)_contig_5857	8.33	4.42	2.73	0.55	1.42	1.34	3.73
Mj_1_GCCAAT_L005_R1_001_(paired)_trimmed_(paired)_contig_3919	178.34	92.95	192.42	195.05	176.19	155.43	128.53
TR58962|c0_g1_i1	8.97	4.82	4.39	0.14	0	0.1	1.58
TR76194|c0_g1_i6	4.61	8.7	5.34	0.22	0	0	1.87
Mj_1_GCCAAT_L005_R1_001_(paired)_trimmed_(paired)_contig_1	78.34	47.82	18.75	12.33	16.86	12.93	25.54
TR78851|c2_g9_i1	54.92	30.51	18.08	11.85	17.91	8.94	13.38
TR78984|c0_g10_i2	17.16	9.99	3.16	2.05	3.42	2.41	3.98
TR78984|c0_g10_i5	22.14	12.42	3.09	2.61	2.88	2.07	4.97
TR78984|c0_g10_i6	13.53	8.54	3.07	1.91	2.12	2.39	3.46
TR66904|c0_g1_i1	38.34	26.57	12.45	10.57	8.84	5.1	21.98
[truncated: 2,246 more rows]
[truncated: 1 more columns]

## Sheet: TransM5
Table S11 Summary of transcript modules and the included transcripts using WCNA analysis for highly expressed transcripts in Mallotus japonicus.
Sequence_name	FPKM_Young_Leaf	FPKM_Mature_Leaf	FPKM_Young_Stem	FPKM_Mature_Stem	FPKM_Bark	FPKM_Central_Cylinder	FPKM_Inflorescence
Mj_1_GCCAAT_L005_R1_001_(paired)_trimmed_(paired)_contig_99	93.43	57.39	98.82	84.72	93.38	71.69	79.89
scaffold12032	95.09	53.91	105.05	106.95	88.43	86.89	72.84
TR53884|c0_g1_i2	44.36	24.97	71.74	52.31	52.61	42.49	53.17
TR73788|c0_g1_i3	4.93	1.07	8.18	2.48	5.68	3.72	3.53
TR42890|c0_g1_i2	3.73	2.32	8.13	6.21	10.3	4.34	6.25
TR60516|c2_g3_i1	11.78	6.88	16.75	9.87	23.68	13.89	0.12
TR55841|c0_g1_i1	25.57	27.26	55.05	47.44	59.47	42.8	53.69
TR55841|c0_g1_i2	34.88	35.94	68.2	54.51	70.08	54.71	72.85
TR50574|c0_g1_i1	143.69	72.23	180.34	129.47	199.22	123.98	139.06
TR55896|c0_g1_i1	21.82	9.17	27.46	29.81	33.68	22.92	17.42
TR55896|c0_g1_i2	24.46	10.76	30.66	29.37	41.78	25.34	13.6
TR56395|c0_g1_i1	12.97	4.74	16.59	16.51	24.41	14.39	9.63
TR47156|c0_g1_i1	9.18	5.27	12.72	12.27	16.72	11.51	7.43
TR47156|c0_g1_i2	8.46	4.68	12.84	9.54	14.87	8.54	5.37
TR55725|c3_g4_i3	6.5	4.98	11.17	8.47	13.26	10.08	10.42
TR61360|c0_g1_i1	2.04	1.17	23.1	4.39	33.09	0.23	24.82
TR55733|c0_g1_i1	73.14	74.61	199.48	130.1	190.11	162.36	110.48
TR52515|c0_g1_i1	15.55	11.04	39.49	16.01	28.96	13.35	27.2
TR52515|c0_g1_i2	12.88	8.98	31.53	13.81	24.08	11.12	23.41
scaffold1453	9.92	7.22	25.73	10.4	17.56	8.9	17.29
TR53587|c0_g1_i1	45.97	23.82	49.58	42.57	66.29	29.96	45.48
TR73867|c2_g1_i8	5.04	7.12	13.69	8.73	10.9	7.27	6.88
TR66380|c0_g1_i1	42	30.36	51.77	46.41	46.65	40.89	33.9
TR41155|c0_g1_i1	4.82	6.32	15.82	11.62	14.32	8.39	11.22
TR74843|c2_g1_i1	15.9	11.13	25.27	25.26	25.39	22.97	14.9
TR74843|c2_g1_i2	8.12	6.06	15.09	10.74	15.41	13.18	8.02
TR65618|c0_g1_i2	2.26	1.81	4.47	3.59	6.05	1.72	4.34
TR75523|c1_g4_i1	3.79	1.42	5.58	2.15	4.26	2.86	2.67
TR67764|c0_g1_i3	6.27	3.72	8.09	6.01	5.97	6.01	7.06
TR67764|c0_g1_i5	6.36	4.49	8.99	5.37	7.76	5.59	6.58
TR53884|c0_g1_i1	9.89	7.08	15.79	9.28	16.8	11.36	11.51
TR52352|c0_g1_i3	10.47	3.85	9.98	7.78	10.43	7.02	5.91
TR51924|c0_g1_i2	53.67	29.04	96.13	47.47	71.57	52.53	44.36
TR52324|c0_g1_i1	62.49	35.57	108.01	58.18	84.49	54.85	50.76
Mj_1_GCCAAT_L005_R1_001_(paired)_trimmed_(paired)_contig_13014	23.98	13.78	32.88	21.64	29.97	31.79	15.32
Mj_1_GCCAAT_L005_R1_001_(paired)_trimmed_(paired)_contig_4842	120.71	52.38	157.93	109.61	145.28	113.97	111.33
TR47837|c0_g1_i1	259.11	127.47	332.11	249.64	334.03	270.47	249.73
TR76137|c0_g1_i2	10	8.24	6.62	6.09	5.02	9.87	8.12
TR47829|c0_g2_i1	107.49	60.73	128.85	116.39	124.98	100.66	91.85
TR66223|c0_g2_i1	8.61	4.2	8.69	8.64	8.92	6.24	6.06
TR59719|c0_g1_i4	2.49	2.37	5.48	2.79	5.17	1.88	3.46
C957126	10.01	7.88	25.6	20.3	19.74	14.43	16.43
TR49790|c0_g1_i1	0.88	1.68	7.27	4.43	6.16	2.77	2.75
TR57372|c0_g1_i1	303.63	134.14	306.89	292.56	297.28	222.04	237.89
TR54011|c0_g1_i2	5.4	4.01	8.2	5.91	7.55	5.74	4.98
TR52405|c0_g1_i1	13.23	14.91	56.8	37.2	71.26	34.86	74.33
TR51073|c0_g1_i1	47.69	30.9	53.88	40.15	53.36	29.91	41.78
TR75443|c1_g2_i1	6.19	4.31	14.59	8.92	14.85	8.32	6.1
TR75443|c1_g2_i2	5.62	4.64	14.48	10.36	15.21	10.79	6.89
TR77333|c1_g1_i1	7.18	2.77	12.05	9.21	13.71	6.95	6.18
TR64634|c1_g1_i1	6.87	6.54	13.43	9.08	12.47	12.49	5.82
scaffold1075	3.76	1.9	5.15	2.08	4.03	2.31	3.34
TR60314|c4_g2_i5	4.62	2.77	5.55	3.98	4.59	2.68	4.48
TR72789|c0_g1_i2	9.99	5.64	14.49	12.02	9.3	9.06	6.88
TR65765|c0_g3_i2	3	1.66	4.11	2.77	5.67	1.62	3.16
TR52075|c0_g1_i2	11.61	11.61	38.56	23.26	38.46	28.09	24.13
TR59648|c0_g1_i1	2.66	2.54	5.27	4	8.38	5.6	7.59
TR59648|c0_g1_i3	6.71	7.78	15.95	12.01	21.01	11.6	16.21
TR59648|c0_g1_i4	4.11	6.94	12.72	10.27	18.65	10.32	15.41
TR66695|c1_g5_i1	83.35	53.73	186.14	101.68	169.28	131.31	113.51
TR64320|c0_g1_i2	10.03	10.18	19.59	12.9	16.51	12.84	13.43
TR75097|c0_g1_i1	14.45	6.82	18.34	15.17	19.33	16.01	8.88
C944840	110.51	66.87	197.69	150.11	190.66	185.2	121.13
TR63813|c0_g1_i4	4.54	2.96	5.08	5.46	6.47	3.7	5.57
TR75419|c3_g1_i1	85.28	52.17	146.26	81.52	124.99	76.06	98.39
Mj_1_GCCAAT_L005_R1_001_(paired)_trimmed_(paired)_contig_11687	10.18	7.08	9.3	12.18	10.4	7.99	12.05
TR54965|c1_g1_i1	90.22	56.48	138.94	119.97	131.6	103.13	91.44
TR57758|c0_g1_i1	19.03	8.87	21.36	18.47	22.91	9.07	22.35
TR57565|c0_g1_i2	103.73	101.09	225.75	150.12	220.21	209.48	138.31
TR69561|c0_g1_i2	3.92	2.28	4.82	3.79	5.09	3.59	4.37
Mj_1_GCCAAT_L005_R1_001_(paired)_trimmed_(paired)_contig_16587	2.97	0.74	9.62	9.04	9.48	8.32	4.02
TR72011|c0_g1_i1	2.3	0.22	13.54	10.79	13.45	12.41	5.91
TR72011|c0_g1_i5	2.17	0.19	15.33	10.94	19.12	13.76	10.49
TR53750|c0_g1_i1	53.72	43.78	75.43	81.8	83.87	64.73	93.68
Mj_1_GCCAAT_L005_R1_001_(paired)_trimmed_(paired)_contig_2264	87.79	56.83	116.25	86.1	114.65	82.2	73.73
TR55611|c0_g1_i1	31.27	29.89	65.47	55.88	73.75	55.97	56.28
TR57884|c0_g1_i1	137.97	84.14	188.03	154.75	159.33	121.72	119.67
scaffold10237	128.75	75.24	178.76	136.18	146.53	115.03	116.69
TR59559|c0_g1_i1	550.46	223.97	653.7	594.33	776.34	543.9	406.8
TR55343|c0_g1_i1	330.23	177.52	433.14	314.61	447.54	318.89	291.69
Mj_1_GCCAAT_L005_R1_001_(paired)_trimmed_(paired)_contig_2290	52.32	22.7	73.67	54.71	54.02	47.16	30.84
TR52458|c0_g1_i1	28.58	14.31	39.47	30.4	33.03	23.32	25.29
C961116	80.29	40.88	129.64	79.69	103.09	75.37	71.09
TR49501|c0_g1_i1	211.81	102.97	335.09	217.14	305.31	206.48	160.94
TR57201|c0_g1_i1	78.17	38.1	80.67	56.5	75.56	48.13	48.29
TR75084|c2_g4_i2	8.56	7.38	12.51	8.99	13.42	8.59	11.3
TR59976|c0_g1_i1	4.44	4.68	6.85	4.86	7.55	5.95	6.64
TR59636|c0_g1_i1	33.1	31.62	86.62	36.48	70.58	43.86	72.58
TR59636|c1_g2_i1	26.58	21.47	67.91	29	59.9	46.87	41.3
TR47867|c0_g1_i1	40.93	32.85	69.95	58.83	63.84	62.74	44.98
TR76589|c0_g1_i2	9.32	9.26	6.02	5.5	1.91	7.7	7.2
TR41557|c0_g1_i1	2.41	2.83	6.11	2.64	7.46	5.95	6.2
TR63204|c1_g1_i1	21.01	17.36	39.69	32.81	42.08	30.7	29.78
Mj_1_GCCAAT_L005_R1_001_(paired)_trimmed_(paired)_contig_33806	1.15	0.94	4.65	4.7	5.42	2.19	3.57
Mj_1_GCCAAT_L005_R1_001_(paired)_trimmed_(paired)_contig_4469	264.02	138.61	358.74	205.65	359.9	281.87	236.51
TR78626|c1_g2_i10	4.2	2.61	5.94	3.33	6.58	2.09	3.1
TR51411|c3_g1_i1	262.57	167.26	439.97	323.15	460.23	326.06	248.73
TR60722|c0_g1_i1	317.89	208.81	339.49	334.53	344.67	277.95	262.24
C961240	5.98	4.69	10.87	7.42	11.08	7.35	8.51
Mj_1_GCCAAT_L005_R1_001_(paired)_trimmed_(paired)_contig_7074	7.21	5.87	11.91	10.83	12.94	6.83	14.31
TR60144|c0_g1_i1	3.35	5.17	15.34	10.66	13.71	7.89	6.11
TR77318|c0_g1_i4	4.8	3.55	6.35	4.77	4.6	4.23	3.09
C960984	2.31	3.8	4.6	4.09	5.99	3.16	4.03
TR46842|c0_g1_i1	111.17	79.35	146.95	128.1	183.31	142.67	163.89
TR52523|c1_g1_i1	90.58	62.91	110.05	91.72	131.47	115.01	127.43
TR62723|c0_g2_i1	37.38	30.93	54.48	44.24	57.67	46.64	48.04
TR62723|c1_g2_i2	58.01	48.57	87.55	65.84	77.87	68.91	80.61
TR62723|c1_g2_i4	45.22	38.07	67.5	55.59	63.16	55.18	57.7
TR77023|c2_g1_i1	125.88	75.08	192.43	127.57	159.95	117.45	117.13
Mj_1_GCCAAT_L005_R1_001_(paired)_trimmed_(paired)_contig_850	87.18	39.12	93.96	69.82	78.76	60.96	50.8
TR70714|c1_g3_i1	111.37	53.52	129.85	92.96	108.52	74.18	64.07
TR75504|c0_g6_i1	8.78	0.77	16.6	17.23	11.07	7.34	7.06
TR60623|c1_g1_i1	6.71	3.72	10.95	7.34	7.68	9.12	5.84
TR52818|c0_g1_i1	43.81	34.59	137.97	57.44	101.34	70.41	57.86
TR69455|c0_g1_i1	3.18	3.04	4.26	4.17	5.04	3.53	5.49
TR75653|c0_g1_i3	8.17	6.04	16.49	13.66	15.28	12.38	12.4
TR61733|c0_g1_i1	20.95	15.22	36.46	22.89	29.51	23.09	23.5
scaffold1180	6.26	4.34	8.63	5.12	12.21	6.92	6.16
TR73367|c0_g1_i1	5.92	3.19	5.27	4.08	5.53	4.4	2.79
TR78185|c2_g1_i2	5.02	14.8	2.91	7.51	1.31	18.13	13.46
TR78185|c2_g1_i4	4.94	15.39	2.95	8.42	1.7	17.72	16.07
TR74207|c2_g1_i1	16.33	13.68	28.06	24.97	27.67	20.62	22.63
TR74953|c0_g1_i1	2.66	2.82	3.49	3.19	5.57	1.33	4.04
TR74953|c0_g1_i3	3.44	2.41	4.94	4.15	5.85	1.82	4.39
TR40770|c0_g1_i1	25.56	17.83	33.51	17.97	35.01	22.42	28.06
TR40770|c0_g1_i2	49.43	32.49	61.19	32.84	69.45	38.47	45.48
TR40770|c0_g1_i3	23.05	16.85	34.86	21.77	39.71	21.87	21.15
TR57838|c1_g1_i1	3.96	2.98	5.11	3.68	5.37	2.15	5.27
Mj_1_GCCAAT_L005_R1_001_(paired)_trimmed_(paired)_contig_1578	23.32	18.24	41.29	39.82	38.96	35.26	28.83
TR50405|c0_g1_i1	28.29	23.01	53.83	58.16	55.93	47.05	35.19
TR50405|c0_g1_i2	32.42	27.7	60.41	60.47	59.84	49.95	39.31
Mj_1_GCCAAT_L005_R1_001_(paired)_trimmed_(paired)_contig_2435	10.68	9.06	8.63	8.44	5.8	10.67	8.52
TR78428|c0_g1_i1	15.22	12.8	10.36	10.88	7.34	13.9	13.02
Mj_1_GCCAAT_L005_R1_001_(paired)_trimmed_(paired)_contig_53332	0.8	1.02	10.08	6.38	12.42	0.89	0.66
Mj_1_GCCAAT_L005_R1_001_(paired)_trimmed_(paired)_contig_19019	9.02	9.58	16.35	11.49	14.86	12.52	14.3
TR69009|c1_g1_i4	5.19	4.8	5.67	4.89	6.34	5.68	6.4
TR65908|c2_g1_i1	10.95	7.03	12.71	5.22	13.57	11.46	7.87
Mj_1_GCCAAT_L005_R1_001_(paired)_trimmed_(paired)_contig_8468	24.56	25.55	245.9	107.14	190.7	90.07	153.4
scaffold14197	12.02	7.84	115.05	49.89	90.72	40.22	74.42
Mj_1_GCCAAT_L005_R1_001_(paired)_trimmed_(paired)_contig_21705	33.68	23.95	37.61	33.12	43.7	33.09	30.96
TR53199|c0_g1_i2	7.52	4.11	10.75	12.77	10.96	5.36	8.11
TR72619|c1_g2_i3	6.32	6.47	4.23	4.16	3.68	5.89	7.64
TR61015|c0_g1_i1	12	8.27	14.32	14.3	13.24	12.23	15.95
TR60910|c0_g1_i2	1.08	1.82	6.37	6.41	10.85	0	5.85
TR60910|c0_g1_i1	1.27	2.92	8.21	7.56	14.41	0.12	7.51
TR60910|c1_g1_i1	0.84	2.91	9.18	8.38	16.91	0.12	7.6
Mj_1_GCCAAT_L005_R1_001_(paired)_trimmed_(paired)_contig_43342	0.4	0.69	1.94	2.42	5.36	0.74	2.29
TR68075|c0_g1_i3	0.08	0.22	2.9	3.31	6.48	0.26	3.27
TR73161|c0_g1_i5	12.9	17.58	7.26	11.37	11.42	12.41	12.1
TR70062|c0_g1_i1	13.82	11.31	19.5	18.84	17.51	14.18	14.76
TR70062|c0_g1_i2	9.58	7.32	12.82	11.03	10.7	10.16	9.86
TR70482|c0_g2_i1	8.99	2.72	8.09	6.73	7.13	5.18	3.97
Mj_1_GCCAAT_L005_R1_001_(paired)_trimmed_(paired)_contig_861	124.35	59.23	190.85	105.25	170.76	107.01	99.45
TR48679|c0_g1_i1	171.31	104.17	224.94	136.26	221.38	130.37	167.27
TR50242|c0_g1_i1	168.5	81	259.63	136.8	204.07	133.94	127.33
C960400	40.49	58.32	29.45	38.65	30.84	33.64	44.83
TR66771|c0_g1_i1	20.9	15.91	43.52	30.57	50.52	36.33	41.71
Mj_1_GCCAAT_L005_R1_001_(paired)_trimmed_(paired)_contig_47436	0.52	0.39	3.28	2.95	6.96	2.41	2.34
Mj_1_GCCAAT_L005_R1_001_(paired)_trimmed_(paired)_contig_3223	20.08	14.76	26.48	19.15	26.64	22.25	19.23
TR77325|c3_g1_i3	13.24	8.51	15.13	10.33	14.74	12.04	11.1
TR56825|c2_g1_i1	4.09	2.05	11.7	13.89	17.44	4.75	20.92
TR47557|c0_g1_i2	40.78	55.45	86.73	116.46	141.21	90.54	131.99
TR68453|c1_g5_i1	2.28	5.55	3.75	2.9	1.91	5.07	2.79
TR68453|c1_g5_i3	3.01	6.56	3.85	2.6	1.81	5.56	3.91
TR69832|c1_g7_i5	1.89	5.66	4.55	2	1.08	3.91	3.02
TR56195|c0_g1_i7	2.84	2.53	4.68	2.7	5.36	2.31	4.85
TR54172|c0_g1_i1	25.7	8.32	22.81	15.81	23.03	18.22	10.8
TR72285|c0_g4_i1	6.88	1.84	7.61	5.68	9.27	3.82	8.55
TR74445|c0_g1_i2	4.29	6.46	2.95	3.23	2.1	5.03	3.72
TR74445|c0_g1_i3	4.25	5.66	2.61	2.67	2.08	6.01	3.56
Mj_1_GCCAAT_L005_R1_001_(paired)_trimmed_(paired)_contig_6796	5.37	6.47	7.84	7.36	9.19	7.28	7.12
TR59367|c0_g1_i3	4.91	2.46	6.35	5.26	6.06	3.68	4.84
Mj_1_GCCAAT_L005_R1_001_(paired)_trimmed_(paired)_contig_42740	1.99	2.75	6.49	6.28	10.84	3.42	7.17
TR71905|c1_g3_i5	3.65	4.6	5.92	3.61	7.48	6.06	6.74
TR61317|c0_g1_i1	57.39	33.57	87.77	80.76	66.44	55.55	50.21
scaffold11022	46.33	27.01	64.15	56.57	50.98	47.08	39.44
Mj_1_GCCAAT_L005_R1_001_(paired)_trimmed_(paired)_contig_23199	9.43	8.49	11.56	7.28	12.54	6.55	9.94
TR77203|c0_g3_i1	3.44	2.66	5.57	4.91	5.06	4	4.32
TR67354|c0_g3_i1	326.98	286.87	596.77	512.32	803.46	424.78	568.91
TR67538|c0_g2_i2	486.73	406.08	1015.02	787.97	1092.58	605.5	865.56
TR61730|c0_g1_i1	4.77	3.39	6.21	3.95	6.01	2.91	6.15
TR57591|c2_g1_i1	14.21	10.29	20.07	16.34	16.55	11.83	12.53
TR57591|c2_g1_i4	7.34	5.47	11.48	7.47	8.74	7.17	8.29
TR73269|c0_g1_i1	11.19	23.03	13.96	12.45	12.25	22.36	13.91
TR78996|c1_g1_i2	7.47	16.82	11.72	9.75	10.25	16.64	9.33
TR77982|c0_g1_i2	74.14	52.69	101.06	77.91	99.66	46.68	71.94
TR65503|c1_g2_i6	8.33	5.58	8.95	5.25	10.03	5.71	6.96
TR61433|c0_g1_i2	4.6	3.82	8.4	6.07	8.98	7.97	8.05
TR68908|c1_g4_i2	4.77	3.66	7.6	5.64	7.63	6.41	5.22
TR77525|c0_g1_i1	6.39	1.84	5.96	4.12	7.86	0.25	2.46
TR57312|c0_g1_i1	5.66	2.72	11	8.04	9.67	8.74	5.84
TR57312|c0_g1_i2	36.49	21.08	53.84	41.85	54.05	34.7	24.47
TR58671|c0_g1_i3	12.25	5.5	11.8	10.59	13.85	8.64	6.22
TR73427|c1_g2_i10	9.53	8.22	13.94	10.98	14.02	7.17	13.64
TR73427|c1_g2_i2	6.14	4.74	8.77	8.1	8.41	5.67	6.71
Mj_1_GCCAAT_L005_R1_001_(paired)_trimmed_(paired)_contig_13428	2.97	3.38	5.75	3.71	4.9	3.96	4.83
TR55332|c0_g1_i3	50.89	40.89	79.73	40.47	75.65	51.97	58.89
TR73746|c0_g1_i1	1.99	1.56	5.12	3.73	2.97	0	0.71
TR55139|c0_g1_i1	6.85	3.22	8.56	6.54	9.01	5.75	4.89
TR61554|c0_g1_i1	5.02	6.16	13.06	6.91	14.33	12.03	6.67
Mj_1_GCCAAT_L005_R1_001_(paired)_trimmed_(paired)_contig_37764	3	3.1	6.03	4.17	6.36	2.5	5.67
TR55638|c0_g1_i1	3.53	3.17	7.12	3.05	7.41	4.71	5.28
TR74638|c0_g1_i1	7.17	5.61	10.9	9.6	12.48	10.4	6.58
TR60653|c0_g1_i1	39.68	23.53	44.87	43.73	34.79	29.21	45.49
scaffold10225	21.12	12.53	24.61	26.56	21.32	17.75	24.04
Mj_1_GCCAAT_L005_R1_001_(paired)_trimmed_(paired)_contig_22069	7.52	5.96	3.24	4.94	2.74	4.47	6.51
Mj_1_GCCAAT_L005_R1_001_(paired)_trimmed_(paired)_contig_12125	2.82	2.06	5.96	3.3	5.23	3.33	6.07
TR67327|c0_g1_i2	3.9	3.62	6.71	6.35	6.51	4.98	4.11
TR79861|c11_g1_i8	2.73	1.84	4.86	1.4	5.14	1.08	2.87
TR65509|c0_g1_i1	17.07	15.75	35	24.49	32.22	26.54	24.39
TR60934|c0_g1_i1	25.51	25.3	33.6	19.67	37.44	31.73	31.65
TR65934|c0_g2_i5	0	0.2	3.43	3.29	5.89	1.15	1.43
Mj_1_GCCAAT_L005_R1_001_(paired)_trimmed_(paired)_contig_4072	9.88	3.47	7.86	5.3	8.91	7.1	5.3
C959410	13.68	7.73	15.99	13.36	17.69	11.87	15.37
TR74977|c0_g2_i3	9.14	8.45	10.97	9.04	12.51	8.01	10.25
TR74977|c0_g2_i4	9.75	5.54	10.99	8.34	11.68	7.48	10.68
scaffold10770	9.57	14.7	19.31	13.82	22.21	16.76	17.08
TR49407|c0_g1_i1	14.48	6.4	38.25	31.28	38.16	23.43	14.64
Mj_1_GCCAAT_L005_R1_001_(paired)_trimmed_(paired)_contig_10182	26.96	25.75	40.97	35.57	44.28	29.22	32.3
TR74587|c2_g2_i1	9.35	9.24	15.87	13.03	16.34	13.95	12.98
TR52582|c0_g1_i5	13.71	8.17	12.26	9.39	13.22	9.73	6.51
TR58324|c0_g1_i3	3.74	2.53	3.91	4.44	4.31	2.78	5.55
TR61558|c0_g1_i1	17.51	11.3	16.9	15.02	19.81	14.36	18.35
TR48494|c0_g1_i1	102.64	73.84	171.67	180.04	161.55	145.89	98.79
TR65742|c0_g1_i1	7.51	6.49	14.93	7.83	13.08	10.57	10.74
TR65742|c0_g1_i2	10.92	8.59	20.06	12.25	17.14	11.89	14.71
TR57463|c0_g1_i2	9.38	11.03	19.81	19.8	29.24	16.85	21.68
TR57660|c0_g1_i2	9.32	10.05	18.82	18.37	24.8	18.16	25.52
scaffold13825	5.94	5.93	10.75	11.48	15.64	10.53	12.59
TR61681|c0_g1_i1	3.4	3.31	7.23	7.08	8.25	7.57	9.67
TR62918|c0_g1_i1	14.39	9.67	14.58	16.67	18.84	14.97	17.45
TR60597|c0_g1_i1	140.04	6.26	132.24	133.52	127.34	10.02	120
Mj_1_GCCAAT_L005_R1_001_(paired)_trimmed_(paired)_contig_3737	2.23	2.94	10.48	4.39	9.92	4.91	9.84
TR62775|c0_g1_i1	18.21	10.72	57.92	38.53	73.38	42.11	30.62
TR62775|c0_g1_i2	7.5	3	17.47	10.79	31.01	15.09	11.69
TR62775|c0_g1_i3	13.43	6.74	44.06	29.39	61.57	36.36	23.21
TR62775|c0_g1_i4	15.25	6.69	43.56	31	58.24	36.56	27.42
TR74012|c0_g1_i1	5.43	7.71	11.33	12.32	13.92	6.72	11.79
TR67740|c1_g2_i3	3.81	3.42	6.6	7.89	11.04	8.08	9.41
TR62418|c1_g1_i8	4.43	2.66	5.8	2.61	5.67	5.12	3.49
TR53929|c1_g1_i1	3.02	1.01	3.91	3.94	5.31	3.52	2.44
TR71028|c4_g1_i1	2.33	2.1	5.14	1.89	4.08	2.98	4.19
TR71028|c4_g1_i6	2.94	1.48	5.67	3.12	3.31	2.82	3.23
TR38663|c0_g1_i1	368.39	194.05	537.71	344.51	548.55	373.61	303.56
TR50804|c0_g1_i1	3.88	4.72	10.67	6.14	15.01	7.71	12.22
TR70991|c1_g2_i3	0.91	5.75	4.2	4.07	0.41	3.67	3.07
TR70335|c0_g1_i1	3.51	2.59	5.57	2.93	6.71	5.08	3.9
Mj_1_GCCAAT_L005_R1_001_(paired)_trimmed_(paired)_contig_22648	18.98	33.7	68.42	71.61	57.5	10.18	89.22
TR60130|c0_g1_i1	8.52	9.91	13.06	8.35	15.3	5.62	12.72
C952114	8.73	5.59	9.86	7.79	12.54	8.25	7.55
Mj_1_GCCAAT_L005_R1_001_(paired)_trimmed_(paired)_contig_588	3.81	6.23	0.98	3.03	3.98	4.25	5.73
Mj_1_GCCAAT_L005_R1_001_(paired)_trimmed_(paired)_contig_14118	3.16	3.38	6.12	6.4	8.21	6.39	7.29
Mj_1_GCCAAT_L005_R1_001_(paired)_trimmed_(paired)_contig_46125	4.13	2.83	8.34	3.43	6.75	4.14	4.27
TR66487|c0_g1_i1	4.17	2.98	6.63	4.48	7.35	4.29	6.18
TR37234|c0_g1_i1	131.69	79.19	223.96	166.21	172.89	128.84	114.39
TR60330|c0_g1_i1	11.51	16.04	6.78	9.93	9.37	8.64	11.92
TR77502|c0_g2_i3	3.03	1.65	3.7	3.1	5.35	2.29	1.82
TR77167|c0_g1_i1	4.71	3.23	5	4.79	5.5	4.3	5.23
TR77167|c0_g1_i3	5.09	2.01	5.58	3.34	6.81	3.5	4.15
TR65935|c1_g1_i4	2.27	1.62	5.5	2.92	3.39	1.89	2.79
TR59449|c0_g1_i2	3.81	2.86	8.63	6.35	8.16	6.77	4.9
TR44806|c0_g2_i1	16.33	22.97	10.64	16.1	11.25	15.1	16.9
TR64586|c2_g1_i1	15.64	11.79	32.41	28.18	34.97	19.89	26.85
TR66576|c0_g2_i1	2.89	1.32	5.43	5.14	6.34	3.4	1.05
TR72286|c0_g3_i1	6.84	5.37	9.02	6.94	9.93	6.62	8.61
TR72286|c0_g3_i6	7.53	5.93	11	9.91	11.68	7.61	10.85
TR66824|c1_g2_i4	3.75	2.12	4.62	3.79	7.64	4.35	4.03
TR66824|c2_g3_i1	3.44	1.16	3.81	0.96	5.13	3.36	2.99
TR74274|c1_g1_i2	2.52	4.05	10.31	5.32	8.51	5.57	8.42
TR79221|c1_g5_i3	3.84	8.17	2.51	1.35	2.23	4.01	3.99
TR55813|c0_g1_i3	16.86	10.44	20.36	10.79	21.49	14.01	15.99
TR72743|c1_g1_i1	4.73	14.29	10.84	7.87	2.94	7.93	3.05
TR60584|c0_g1_i3	5.32	2.65	7.35	5.88	5.72	4.89	5.48
TR53531|c0_g1_i1	2.47	1.67	10.91	8.68	12.97	9.4	16.37
TR56346|c0_g1_i2	5.96	8.47	8.19	5.86	5.93	6.49	5.16
TR60534|c1_g1_i2	7.1	2.17	8.88	6.56	8.02	2.74	7.53
TR71479|c0_g1_i2	17.09	10.96	16.13	15.86	17.02	13.83	18.25
TR44615|c0_g1_i1	283.29	146.71	370.67	261.08	302.51	296.96	226.41
TR74755|c1_g2_i1	24.55	23.29	15.2	14.74	8.18	21.24	11.54
TR75259|c0_g1_i1	6.34	5.36	7.46	7.15	6.32	5.61	5.54
TR59660|c1_g2_i3	11.45	3.87	9.27	12.91	13.64	8.76	10.93
TR62188|c0_g2_i2	7.04	2.33	6.44	7.15	10.26	5.77	8.3
TR57968|c5_g1_i1	457.66	212.41	755.17	423.22	776.38	633.83	438.46
TR64370|c0_g2_i3	2.53	1.35	4.87	3.97	5.82	4.17	3.56
TR66443|c4_g3_i6	2.12	0.41	3.74	3.69	5.37	3.05	2.29
TR70662|c0_g1_i1	2.2	1.23	7.99	6.4	7.67	5.49	1.63
TR62378|c0_g1_i1	22.26	17.54	38.85	28.91	38.52	24.42	32.52
TR62378|c0_g1_i2	7.66	3.19	13.11	9.28	16.45	10.98	11.26
TR72714|c0_g3_i2	1.61	1.32	4.33	4	5.14	4.07	2.72
TR41408|c0_g1_i1	77.59	52.89	103.97	79.9	89.19	66.22	56.96
TR42933|c0_g2_i1	1.09	1.22	6.2	1.73	4.07	2.22	4.3
TR66607|c0_g1_i2	5.52	5.16	8.12	6.24	8.75	7.2	6.39
TR57198|c0_g1_i1	7.72	6.41	11.89	7.86	11.43	8.36	10.04
TR66361|c0_g1_i4	17.26	13.22	39.11	30.05	32.14	25.77	23.78
TR75707|c0_g1_i2	2.91	3.56	4.87	3.96	5.63	2.6	4.71
TR51661|c0_g1_i2	3.74	9.63	3.82	4.56	3.55	10.95	3.94
TR64874|c0_g3_i1	5.15	3.21	10.01	5.7	10.72	7.39	10.64
TR69503|c0_g1_i1	6.63	7.96	14.82	10.94	12.68	9.41	11.86
C972672	3.19	3.9	5.19	4.94	6.63	5.95	7.38
TR60538|c0_g1_i2	6.52	3.6	5.55	5.97	7.79	5.78	6.31
Mj_1_GCCAAT_L005_R1_001_(paired)_trimmed_(paired)_contig_7326	3.67	3.31	6.62	4.11	7.09	1.67	6.17
TR66018|c0_g1_i2	3.34	2.97	4.96	3.32	5.6	2.75	4.82
TR24786|c0_g1_i1	19.64	15.18	32.79	25.5	27.49	29.67	20.08
TR59462|c0_g1_i1	74.96	268.69	322.69	202.21	591.43	9.17	279.34
scaffold1159	40.41	144.28	175.78	125.47	351.05	4.45	158.96
TR66504|c0_g1_i2	3.6	2	6.11	2.86	4.64	3.11	3.75
TR50107|c0_g1_i3	6.35	4.36	10.46	4.64	11.03	7.62	10.02
TR50107|c0_g1_i4	2.79	2.46	6.31	3.05	5.75	4.5	5.91
TR69868|c0_g1_i2	4.22	2.64	7.02	3	6.31	4.2	5.31
Mj_1_GCCAAT_L005_R1_001_(paired)_trimmed_(paired)_contig_30303	0.86	3.03	11.94	14.26	19.63	1.04	16.06
TR74028|c1_g1_i1	0.86	3.58	13.12	16.5	23.98	1.25	17.79
TR71941|c0_g5_i3	6.51	4.8	8.84	7.91	9.3	5.25	9.84
Mj_1_GCCAAT_L005_R1_001_(paired)_trimmed_(paired)_contig_8558	17.82	14.86	50.17	30.6	48.36	37.04	29.96
TR49875|c0_g1_i1	28.51	25.65	67.12	43.36	62.27	45.41	40.48
TR49875|c0_g1_i3	25.59	21.51	64.07	39.32	60.52	46.73	47.26
TR76751|c2_g3_i1	4.37	3.55	6.58	4.64	5.78	5.79	4.38
Mj_1_GCCAAT_L005_R1_001_(paired)_trimmed_(paired)_contig_24587	13.3	8.74	17.41	17.53	15.39	13.6	11.63
TR77988|c0_g3_i2	6.34	6.72	3.43	7.61	2.56	6.08	3.38
TR68639|c2_g4_i2	3.15	2.62	4.38	3.98	5.33	3.67	3.46
scaffold11948	15.87	11.71	24.03	21.43	32.5	17.5	24.55
TR63741|c0_g1_i1	75.12	53.81	151.75	123.65	200.47	96.12	138.92
TR63741|c0_g1_i2	47.03	35.65	90.83	67.73	118.5	59.12	80.3
TR61263|c1_g5_i1	4.74	3.1	5.14	5.75	6.73	4.86	7.27
Mj_1_GCCAAT_L005_R1_001_(paired)_trimmed_(paired)_contig_19837	5.92	10.43	1.96	7.32	2.21	10.86	1.82
Mj_1_GCCAAT_L005_R1_001_(paired)_trimmed_(paired)_contig_3670	4.42	14.54	16.28	9.66	20.69	9.65	19.79
TR69056|c1_g1_i1	4.63	13.99	16.05	9.17	19.27	13.4	19.84
TR69056|c1_g1_i2	3.82	12.6	13.78	7.95	20.27	9.14	17.29
Mj_1_GCCAAT_L005_R1_001_(paired)_trimmed_(paired)_contig_5530	152.88	81.06	184.83	137.98	159.99	105.63	120.16
Mj_1_GCCAAT_L005_R1_001_(paired)_trimmed_(paired)_contig_566	169.53	100.11	227.96	176.97	163.47	133.39	126.16
Mj_1_GCCAAT_L005_R1_001_(paired)_trimmed_(paired)_contig_21108	10.67	9.81	19.44	12.99	16.7	14.06	16.5
TR72746|c3_g3_i1	0.27	0.76	8.12	8.64	11.52	2.06	6.68
Mj_1_GCCAAT_L005_R1_001_(paired)_trimmed_(paired)_contig_13088	0.83	0.97	15.82	9.03	18.95	2.7	10.95
Mj_1_GCCAAT_L005_R1_001_(paired)_trimmed_(paired)_contig_28045	0.37	1.79	25.87	15.27	27.67	9.02	26.85
TR54516|c0_g1_i4	0.35	0.51	4.99	6.71	8.43	3.33	4.69
TR54516|c0_g1_i5	0	0	3.86	3.99	7.5	0.84	3.47
TR55240|c0_g1_i1	0.59	0.57	8.92	7.08	13.11	4.95	10.84
TR55240|c0_g1_i4	0.67	0.38	4.41	3.4	8.21	1.78	7
TR55240|c0_g1_i6	0.17	0.16	6.31	5.05	6.76	1.12	4.13
TR55240|c0_g1_i7	0.42	0.27	5.45	2.45	4.83	1.09	3.32
TR71209|c0_g2_i3	0.56	1.34	5.57	1.76	7.85	4.6	9.3
Mj_1_GCCAAT_L005_R1_001_(paired)_trimmed_(paired)_contig_9109	11.95	8.59	14.35	9.23	14.75	9.05	13.26
TR75702|c0_g2_i6	5.5	4.42	7.46	4.38	7.55	3.6	5.95
TR33833|c0_g1_i1	52.26	50.68	75.21	64.72	72.63	65.06	53.72
C948458	1.45	1.51	5.13	3.77	6.32	4.25	3.26
Mj_1_GCCAAT_L005_R1_001_(paired)_trimmed_(paired)_contig_8086	20.39	19.07	43.15	21.45	40.62	24.95	24.47
TR72631|c5_g1_i1	17.12	9.37	26.4	20.02	25.16	12.17	16.14
TR72631|c5_g1_i3	47.54	43.21	102.61	59.93	92.76	63.82	59.88
TR62532|c0_g1_i3	1.79	2.47	10.77	8.19	8.6	4.4	5.29
Mj_1_GCCAAT_L005_R1_001_(paired)_trimmed_(paired)_contig_5725	31.2	21.8	43.58	32.21	51.77	31.51	34.69
TR49972|c0_g1_i3	49.43	36.28	74.17	48.18	85.3	48.94	51.59
TR51359|c0_g1_i1	34.29	25.16	53.74	37.14	57.4	35.01	39.57
TR51359|c0_g1_i2	157.28	84.75	221.12	132.83	210.38	144.71	147.49
TR71110|c1_g1_i4	4.02	3.03	4.81	5.63	5.2	3.4	6.16
TR72690|c0_g2_i2	4.74	2.91	9.77	3.49	8.09	4.51	7.51
scaffold11001	3.7	2.81	5	5.2	5.65	4.4	6.88
TR64841|c0_g1_i1	3.63	3.6	6.09	4.18	6.03	5	5.57
TR53838|c0_g3_i1	253.76	130.13	379.82	199.72	295.81	196.8	193.26
TR55305|c0_g3_i1	175.88	91.54	277.87	133.7	206.62	135.22	136.74
TR60458|c0_g1_i4	4.9	1.6	11.98	8.39	13.69	10.17	17.29
TR66301|c1_g1_i4	44.62	38.4	51.66	54.29	59.05	33.9	51.09
TR51671|c0_g1_i4	1.53	1.46	5.15	3.13	4.26	2.92	2.81
TR69292|c0_g1_i4	6.27	4.55	12.13	8.93	11.88	9.28	8.63
TR60533|c0_g2_i1	8.78	6.85	13.15	11.05	14.86	10.02	14.85
scaffold12674	21.33	19.09	36.08	33.22	39.94	31.66	37.21
TR68092|c0_g1_i2	3.93	1.88	5.15	5.19	3.26	2.66	4.09
TR71297|c0_g1_i2	3.27	2.57	4.55	0.47	5.29	3.27	2.04
TR74974|c0_g1_i1	3.84	3.27	9.24	7.16	10.8	9.2	8.97
scaffold1324	11.66	6.2	10.88	12.8	15.09	11.56	13.11
TR66143|c0_g1_i2	8.26	6.17	8.88	9.87	7.98	7.24	9.33
TR75567|c0_g1_i5	3.95	5.49	1.58	2.26	0.71	2.55	2.81
TR59786|c0_g1_i3	13.13	10.62	20.11	22.54	19	16.13	11.95
TR61065|c0_g1_i1	17.93	20.25	36.51	29.6	44.05	22.11	28
TR61065|c0_g1_i2	19.97	27.04	42.39	37.18	59.23	31.59	36.59
TR66042|c3_g1_i2	2.71	1.08	4.78	3.93	5.04	0	4.89
TR75466|c1_g2_i4	1.52	0.92	2.52	3.41	6.53	0	4.16
TR60309|c1_g1_i3	58.75	54.05	102.7	80.26	90.88	71.89	89.03
scaffold13631	44.85	43.18	80.1	51.81	73.5	52.61	70.44
TR71272|c2_g1_i5	22.89	24.78	20.87	26.77	21.45	25.05	23.7
TR78356|c1_g1_i2	14	18.36	6.47	5.36	5.99	11.26	11.35
TR60775|c0_g1_i1	0.51	0.33	5.93	1.63	5.51	0.19	3.12
TR70856|c1_g2_i1	4.74	7.4	3.88	4.76	5.37	6.17	5.26
TR70856|c1_g2_i3	4.74	7.13	3.6	3.72	5.97	6.76	4.4
Mj_1_GCCAAT_L005_R1_001_(paired)_trimmed_(paired)_contig_3619	11.93	8.1	16.01	14.26	21.29	11.8	10.68
TR72127|c0_g2_i1	2.56	2.79	7.18	3.48	5.43	3.44	3.42
TR27933|c0_g1_i1	19.2	10.18	31.44	27.95	29.71	27.28	19.26
TR66001|c0_g1_i3	22.4	20.03	43.55	34.09	43.43	33.83	27.59
Mj_1_GCCAAT_L005_R1_001_(paired)_trimmed_(paired)_contig_13483	50.11	40.68	103.43	82.28	91.03	71.74	65.58
TR58370|c1_g1_i1	3.08	2.39	7.43	13.53	18.1	2.17	9.91
TR73554|c1_g1_i7	2.29	1.71	7.4	10.16	14.06	3.89	7.19
Mj_1_GCCAAT_L005_R1_001_(paired)_trimmed_(paired)_contig_8798	4.44	5.48	3.87	5.42	3.3	5.45	5.37
TR64469|c1_g1_i1	16	18.23	21.54	18.35	22.74	15.49	19.51
Mj_1_GCCAAT_L005_R1_001_(paired)_trimmed_(paired)_contig_617	14.1	10.36	25.42	22.97	22.32	17.21	15.87
TR55838|c0_g1_i2	7.11	6.36	11.95	11.18	10.02	7.83	7.37
Mj_1_GCCAAT_L005_R1_001_(paired)_trimmed_(paired)_contig_5178	26.79	16.61	37.09	29.33	40.18	32.06	21.34
TR56457|c1_g1_i3	39.67	19.14	55.41	45.18	54.23	46.26	28.99
scaffold10681	37.6	17.31	54.19	44.84	51.23	47.07	29
TR77681|c0_g2_i3	4.92	11.94	8.04	8.2	6.18	9.56	4.63
TR77892|c0_g1_i3	4.15	11.54	6.48	7.03	5.54	9.66	4.58
TR75047|c0_g2_i2	3.22	2.36	6.6	8.34	11.03	2.66	8.26
TR78306|c0_g2_i3	3.59	3.2	6.16	4.82	7.07	3.46	6.39
TR70257|c0_g1_i2	5.23	4.25	7.76	8.81	8.08	3.91	9.78
TR70980|c2_g1_i3	9.03	6.12	10.85	13.71	16.84	6.67	15.93
TR68381|c1_g1_i1	17.41	12.64	18.54	16.97	18.64	11.76	19.74
scaffold1441	7.35	5.02	7.23	7.85	7.56	5.49	9.1
Mj_1_GCCAAT_L005_R1_001_(paired)_trimmed_(paired)_contig_4526	6.17	6.12	3.24	5.32	2.51	4.51	8.06
Mj_1_GCCAAT_L005_R1_001_(paired)_trimmed_(paired)_contig_9712	13.02	26.96	52.58	61.64	76.02	37.34	43.29
TR75390|c1_g2_i6	4.6	11.41	24.14	24.84	36.17	15.74	17.3
scaffold1244	3.53	7.22	12.54	14.48	20.53	11.01	10.08
scaffold1245	3.54	8.45	15.21	16.9	21.58	10.79	12.27
TR41863|c0_g1_i1	19.4	15.23	30.49	19.93	29.41	14.34	17.86
TR30884|c0_g1_i2	24.06	17.02	28.57	22.19	32.11	20.14	28.42
Mj_1_GCCAAT_L005_R1_001_(paired)_trimmed_(paired)_contig_6794	33.16	25.46	64.32	34.79	53.04	38.42	31.13
scaffold10253	14.46	8.89	23.83	14.06	20.93	11.88	13.42
Mj_1_GCCAAT_L005_R1_001_(paired)_trimmed_(paired)_contig_10521	6.67	6.14	9.81	7.24	11.15	5.56	8.88
TR64320|c0_g1_i5	5.37	4.99	9.79	8.31	12.65	6.71	8.6
Mj_1_GCCAAT_L005_R1_001_(paired)_trimmed_(paired)_contig_27160	4.47	3.5	9.31	6.38	8.76	7.27	5.32
TR62434|c0_g1_i2	10.12	4.12	12.13	6.15	12.15	7.07	8.09
TR54097|c0_g1_i1	6.49	4.85	10.83	8.37	10.11	4.76	11.28
Mj_1_GCCAAT_L005_R1_001_(paired)_trimmed_(paired)_contig_13969	5.56	2.44	6.19	5.24	6.29	3.67	7.11
Mj_1_GCCAAT_L005_R1_001_(paired)_trimmed_(paired)_contig_17033	9.35	4.09	13.45	7.01	13.8	6.93	11.4
TR62887|c0_g1_i1	56.5	28	69.91	47.41	58.91	44.29	40.67
TR62887|c0_g1_i2	50.52	26.34	63.07	42.96	52.71	42.72	35.9
TR62887|c0_g1_i3	45.62	21.9	52.58	38.38	44.38	33.51	33.13
Mj_1_GCCAAT_L005_R1_001_(paired)_trimmed_(paired)_contig_4751	12.8	5.8	4.55	5.54	3.53	10.13	6.15
TR75753|c1_g2_i3	18.14	8.42	8.68	7.3	4.89	17.62	7.04
TR76213|c2_g1_i3	11.4	4.26	3.98	5.39	2.88	10	4.35
TR78820|c1_g1_i3	6.36	3.77	9.95	6.55	8.27	5.1	5.13
TR78820|c1_g1_i6	5.36	3.3	7.67	4.54	5.1	4.24	3.22
TR51479|c0_g1_i1	14.06	9.03	24.09	19.23	22.07	15.31	18.81
TR64731|c3_g1_i6	2.98	2.94	4.66	4.93	5.71	4.9	5.79
Mj_1_GCCAAT_L005_R1_001_(paired)_trimmed_(paired)_contig_4993	4.4	3.4	4.9	5.11	5.7	4.24	4.46
TR78561|c3_g1_i1	3.55	4.46	5.98	7.19	8.6	6.2	5.66
TR78561|c3_g1_i2	3.56	4.11	6.51	5.19	6.71	5.4	4.64
TR78561|c3_g1_i3	3.97	3.48	7.6	5.57	7.35	7.28	4.61
TR78561|c3_g1_i4	4.07	3.79	7.88	5.67	8.4	6.89	4.94
TR78284|c0_g2_i3	10.49	6.33	10.5	8.53	10.45	7.88	8.34
TR74898|c1_g2_i4	0.75	0.72	10.43	6.27	13.22	0.84	10.02
TR57704|c0_g1_i1	1.64	2.38	7.46	3.49	7.87	4.19	3.02
TR52362|c0_g1_i1	8.36	11.82	35.52	13.25	30.11	20.34	18.98
TR62815|c1_g1_i2	5.45	3.55	10.68	7.85	10.06	9.32	4.82
TR54789|c0_g1_i2	3.89	2.53	5.92	3.02	4.84	3.17	2.44
TR55435|c1_g1_i3	6.53	4.27	6.43	5.43	5.99	4.34	3.18
Mj_1_GCCAAT_L005_R1_001_(paired)_trimmed_(paired)_contig_39508	15.03	3.89	35.95	36.59	35.5	26.88	15.25
Mj_1_GCCAAT_L005_R1_001_(paired)_trimmed_(paired)_contig_8527	10.01	7.6	13.27	15.7	20.22	4.55	14.6
TR54882|c0_g1_i1	14.92	14.3	28.88	26.04	28.75	23.06	18.46
Mj_1_GCCAAT_L005_R1_001_(paired)_trimmed_(paired)_contig_25880	2.13	2.6	4.89	2.9	5.92	2.03	4.1
TR70430|c1_g1_i2	6.66	4.46	6.82	6.28	8.53	6.08	6.18
C964636	5.86	6.52	11.47	6.06	11.88	6.7	8.2
TR38995|c0_g1_i1	4.8	4.85	7.27	5.45	6.78	4.73	5.41
scaffold14398	0.58	0	2.36	2.79	5.26	0.65	2.97
Mj_1_GCCAAT_L005_R1_001_(paired)_trimmed_(paired)_contig_18679	3.46	3.89	5.3	4.08	5.41	4.56	4.31
TR62974|c0_g1_i1	12.51	7.2	19.07	15.64	18.14	14.59	18.49
TR62974|c0_g1_i2	13.68	10.18	18.42	15.21	21.78	18.68	17.21
TR72090|c0_g1_i6	4.26	2.94	5.72	3.95	5.85	2.5	5.26
TR75054|c0_g1_i1	15.66	16.82	12.95	14.36	9.78	15.18	13.55
TR73040|c0_g1_i3	3.24	2.91	6.14	5.15	6.61	5.21	6.12
TR55876|c0_g1_i1	7.84	2.39	18.25	11.64	10.46	6.29	7.72
TR68307|c0_g1_i1	9.43	10.18	15.54	13.08	17.58	13.06	14.41
Mj_1_GCCAAT_L005_R1_001_(paired)_trimmed_(paired)_contig_12414	2.83	1.23	5.44	1.62	4.58	2.27	3.28
Mj_1_GCCAAT_L005_R1_001_(paired)_trimmed_(paired)_contig_6269	8.27	1.45	7.79	5.03	7.22	6.58	3.4
TR71398|c1_g1_i2	4.75	5.69	3.39	3.88	2.87	5.52	3.22
TR55349|c0_g1_i1	8.56	7.05	12.84	9.69	13.53	10.04	13.31
TR55349|c0_g1_i2	4.64	4.05	10.15	5.27	8.14	7.08	8.9
TR55349|c0_g1_i3	8.33	5.81	11.04	4.95	12.44	9.43	10.09
TR56098|c0_g1_i1	7.31	4.89	10.54	6.37	9.55	8.1	8.82
TR57554|c0_g1_i2	38.69	81.96	45	28.75	53.02	60.15	16.95
C924334	6.51	3.95	13.04	7.22	14.88	4.56	8.76
TR45831|c0_g1_i2	3.56	3.14	9.09	3.28	8.37	4.25	4.67
TR69195|c0_g1_i2	10.4	8.7	7.85	7.68	6.85	10.4	8.95
TR44114|c0_g1_i2	230.99	196.68	356.34	281.65	390.37	250.1	329.47
TR62396|c3_g1_i1	71.82	50.28	647.82	285.39	590.07	445.65	356.07
TR76258|c1_g1_i1	4.87	3.29	5.8	5.88	5.81	4.51	6.37
TR76258|c1_g1_i2	7.6	5.72	10.07	9.4	9.55	7.7	9.16
TR76082|c3_g1_i1	28.15	21.68	18.52	21.87	15.56	28.93	16.73
scaffold12564	23.2	17.98	13.95	15.48	11.95	21.81	11.8
TR68297|c0_g1_i2	2.61	2.11	4.6	4.56	6.05	3.33	2.96
TR70166|c1_g1_i2	6.97	3.6	15.02	6.62	11.72	8.03	8.93
TR56491|c0_g1_i1	24.89	15.18	26.28	23.24	23.82	19.82	15.7
Mj_1_GCCAAT_L005_R1_001_(paired)_trimmed_(paired)_contig_3735	12.43	9.18	7.55	7.16	6.07	9.74	6.51
TR74378|c1_g3_i2	13.69	9.72	7.13	8.15	6.01	10.66	7.62
TR55870|c0_g3_i3	5.78	3.77	5.85	5	6.23	2.82	3.7
Mj_1_GCCAAT_L005_R1_001_(paired)_trimmed_(paired)_contig_4893	12.07	9.82	15.37	12.34	14.87	13.77	14.93
TR74592|c0_g3_i1	6.67	4.45	8.33	8.65	9.04	7.16	9.96
scaffold13770	5.01	8.02	8.94	7.01	10.15	6.43	10.28
TR65521|c1_g1_i2	5.55	4.96	7.59	5.99	7.42	6.83	7.99
Mj_1_GCCAAT_L005_R1_001_(paired)_trimmed_(paired)_contig_1804	14.01	12.48	18.59	15.31	17.1	15.07	16.37
TR49309|c0_g1_i1	303.59	157.7	422.83	405.68	468.2	361.46	266.33
TR55135|c0_g1_i2	13.99	7.95	17.53	16.41	14.86	12.58	14.47
TR55135|c0_g1_i3	11.91	6.43	13.73	11.4	10.88	9.65	10.53
TR56061|c0_g1_i2	12.15	7.27	14.11	15.29	15.28	10.8	11.6
TR56061|c0_g1_i3	14.44	9.37	16.35	17.05	16.32	13	13.88
Mj_1_GCCAAT_L005_R1_001_(paired)_trimmed_(paired)_contig_31395	0.34	2.61	17.7	4.33	14.03	1.89	2.19
TR67837|c2_g1_i3	13.13	12.08	64.82	38.27	74.33	14.58	19.44
TR64799|c0_g2_i3	22.27	13.67	115.71	61.93	130.28	21.9	33.99
TR67837|c2_g1_i2	25.83	18.88	155.57	93.04	173.78	34.02	43.9
TR74014|c2_g1_i8	5.84	6.54	8.99	7.92	9.92	8.61	10.76
Mj_1_GCCAAT_L005_R1_001_(paired)_trimmed_(paired)_contig_3425	97.02	69.18	161.13	159.9	174.2	125.71	115.83
TR67152|c0_g1_i1	5.65	2.69	6.47	4.5	7.44	6.03	4.69
TR52514|c0_g1_i2	5.9	8.24	2.4	4.86	2.59	2.49	6.53
TR57951|c0_g2_i4	7.09	4.27	6.37	6.24	7.28	4.16	6.54
TR61099|c0_g1_i1	12.57	7.69	15.98	12.55	12.11	12.26	10.69
TR61099|c0_g1_i2	9.09	5.57	11.66	10.32	13.1	9.53	7.65
TR61099|c0_g1_i3	11.43	6.77	10.82	9.16	11.52	9.89	8.37
Mj_1_GCCAAT_L005_R1_001_(paired)_trimmed_(paired)_contig_3527	22.98	16.89	23.19	24.74	23.07	20.83	21.07
TR70761|c0_g1_i1	25.57	17.64	25.39	29.05	24.43	21.93	23.57
Mj_1_GCCAAT_L005_R1_001_(paired)_trimmed_(paired)_contig_14251	7.7	8.19	21.37	23.41	36.66	22.32	33.64
TR71531|c0_g2_i5	6.06	8.91	22.44	20.14	35.62	23.92	36.96
TR74391|c1_g1_i4	2.35	2.52	5.27	4.09	4.96	5.24	5.8
TR65903|c0_g2_i1	3.62	6.14	1.38	1.87	0.88	3.48	1.16
TR62570|c1_g1_i1	11.28	12.72	18.33	16.12	17.78	17.52	22.49
TR62570|c2_g1_i5	5.66	5.21	7.78	7.02	10.02	8.42	10.26
TR73713|c0_g3_i1	1.5	2.11	3.52	3.53	5.31	2.94	3.73
TR59865|c0_g1_i2	0.84	1.19	5.41	1.49	4.38	0.35	1.44
Mj_1_GCCAAT_L005_R1_001_(paired)_trimmed_(paired)_contig_5019	12.73	25.5	5.65	11.27	5.92	20.12	5.14
TR74640|c0_g1_i3	13.75	25.72	6.16	11.38	8.37	21.14	6.34
TR74685|c0_g2_i2	14.28	22.31	5.91	10.15	7.91	20.17	6.76
TR74685|c0_g2_i4	14.52	25.39	7.44	11.72	8.33	21.46	6.86
scaffold13681	6.97	3.09	4	7.28	9.9	6.78	6.53
TR68284|c0_g1_i2	7.78	5.69	14.35	4.53	13.78	9.66	11
Mj_1_GCCAAT_L005_R1_001_(paired)_trimmed_(paired)_contig_3506	14.32	10.12	26.29	26.87	22.36	18.25	8.4
TR70263|c0_g1_i2	16.24	11.01	29.72	28.31	23.52	19.18	9.73
Mj_1_GCCAAT_L005_R1_001_(paired)_trimmed_(paired)_contig_7256	21.14	16.94	20.65	17.55	21.82	19.85	18.96
TR62008|c0_g1_i5	6.68	4.08	8.16	6.13	8.22	6.77	6.93
TR65397|c0_g1_i3	4.19	2.95	5.84	3.46	5.71	3.63	5.29
Mj_1_GCCAAT_L005_R1_001_(paired)_trimmed_(paired)_contig_979	26.67	25.92	44.45	50.37	58.74	34.29	43.84
TR73947|c0_g4_i1	43.32	47.4	84.47	58.97	90.42	52.6	80.39
TR62252|c0_g1_i2	5.4	5.46	3.67	4.42	3.88	4.62	5.2
TR63740|c0_g1_i1	6.89	8.07	16.3	12.46	23.79	6.43	16.18
TR63740|c0_g1_i4	11.59	12.24	22.3	18.1	33.69	9.2	21.29
TR63740|c0_g1_i5	6.19	7.34	9.97	9.79	18.91	4.53	12.29
scaffold14370	5.11	6.17	10.93	8	15.47	5.03	11.95
scaffold14371	4.42	4.09	7.24	7.31	12.19	3.56	7.85
TR79809|c3_g1_i1	20.6	18.59	25.23	23.1	21.53	18.76	18.83
Mj_1_GCCAAT_L005_R1_001_(paired)_trimmed_(paired)_contig_12458	8.98	6.87	10.57	7.15	9.51	6.97	8.4
TR73567|c3_g2_i2	3.5	2.56	8.47	4.23	9.2	4.32	7.9
TR76336|c0_g5_i1	1.98	2.14	7.29	3.92	6.63	2.46	6.09
TR55803|c0_g1_i1	4.54	2.12	5.09	3.55	6.5	5.27	7.09
Mj_1_GCCAAT_L005_R1_001_(paired)_trimmed_(paired)_contig_2100	49.26	42.43	115.82	98.03	106.3	81.16	72.65
TR49486|c0_g1_i1	42.23	41.42	104.08	90.56	107.66	72.62	71.23
Mj_1_GCCAAT_L005_R1_001_(paired)_trimmed_(paired)_contig_2329	27.04	24.9	12.75	18.24	16.25	21.45	15.21
TR69082|c1_g2_i1	6.38	6.08	21.72	9.46	17.58	9.94	13.56
TR76274|c1_g1_i1	16.03	10.99	41.28	27.8	35.6	17.3	31.81
TR75697|c1_g2_i4	7.58	4.99	15.79	11.68	15.86	11.39	6.71
scaffold10053	5.6	1.93	3.75	3.99	5.21	3.01	5.05
TR79359|c0_g1_i4	2.04	1.83	7.59	6.38	10.48	3.48	2.6
Mj_1_GCCAAT_L005_R1_001_(paired)_trimmed_(paired)_contig_11766	3.03	1.3	8.57	3.61	8.39	2.52	3.59
TR71574|c1_g1_i2	2.24	1.02	5.74	2.95	5.41	1.95	3.46
TR71574|c1_g1_i3	2.33	1.73	8.13	5.8	9.19	4.43	4.5
TR71574|c1_g1_i7	1.84	1.12	7.65	4.92	9.06	3.69	4.25
TR57936|c0_g1_i1	1.69	3.66	6.25	3.95	6.43	3.77	5.68
TR70472|c0_g1_i2	5.75	10.16	1.82	2.8	2.63	5.87	4.35
Mj_1_GCCAAT_L005_R1_001_(paired)_trimmed_(paired)_contig_5877	6.98	4.44	12.29	8.45	9.61	10.42	6.38
TR77812|c2_g1_i1	11.91	9.87	19.75	18.36	21.07	15.57	15.44
TR77812|c2_g1_i2	5.75	2.33	5.33	5.53	4.94	2.12	4.98
TR54803|c0_g1_i1	13.87	13.52	19.89	15.42	20.64	9.63	18.33
Mj_1_GCCAAT_L005_R1_001_(paired)_trimmed_(paired)_contig_14071	22.69	18.85	34.39	33.56	36.02	27.79	30.76
TR52004|c0_g1_i1	7.35	5.87	12.18	10.95	13.9	10.16	14.79
TR52004|c0_g1_i2	6.28	4.85	9.15	8.31	12.74	9.29	11.06
scaffold1053	7.76	3.7	10.2	6.16	8.13	6.9	6.13
TR65170|c0_g1_i1	4.4	2.93	7.56	5.78	6.5	5.1	3.83
TR74986|c0_g1_i2	7.17	3.56	7.67	5.22	8.05	2.71	5.29
TR59777|c0_g1_i1	5.61	5.65	10.09	6.83	9.41	8.73	12.71
scaffold11054	5.5	6.95	7.82	7.84	9.97	8.5	10.7
scaffold13840	36.45	15	68.19	46.02	54.02	48.02	30.3
Mj_1_GCCAAT_L005_R1_001_(paired)_trimmed_(paired)_contig_5335	47.12	26.8	74.12	58.93	78.4	56.97	44.69
scaffold13797	5.22	4.83	8.06	4.14	7.8	6.33	5.14
Mj_1_GCCAAT_L005_R1_001_(paired)_trimmed_(paired)_contig_2348	39.91	26.25	61.69	38.78	46.91	23.49	43.38
TR48597|c0_g1_i3	6.06	3.15	10	9.62	12.68	7.49	7
TR64152|c0_g2_i1	6.27	5.05	17.39	12.42	26.32	1.24	14.86
TR64152|c0_g2_i4	8.18	5.28	19.25	13.83	28.76	1.33	15.73
scaffold11895	4.24	2.13	12.54	9.43	19.47	1.07	8.86
TR67328|c0_g2_i1	119.1	59.57	293.75	309.97	341.23	214.88	157.58
scaffold1323	65.27	31.74	156.51	175.18	180.53	119.59	95.83
TR46106|c0_g1_i1	2.17	2.39	13.47	8.97	22.11	11.78	16.35
TR64583|c0_g1_i1	6.86	4.66	4.97	4.4	3.16	6.6	4.69
TR66736|c0_g2_i1	11.12	9.74	15.71	13.17	20.02	15.46	19.77
TR68713|c0_g1_i3	4.61	4.33	6.49	7.26	8.45	6.65	8.17
scaffold14326	3.75	3.48	9.26	2.83	6.75	5.64	6.75
TR50605|c0_g1_i1	42.27	43.83	78.79	64.99	78.67	69.1	75.11
TR50605|c0_g1_i2	41.88	40.39	80.16	61.3	83.54	59.18	65.61
TR75591|c0_g2_i1	3.8	3.37	5.01	4.77	4.72	4.07	3.66
TR61360|c0_g1_i5	2.18	0.6	26.03	4.62	35.35	0	23.45
TR73415|c2_g2_i6	6.56	3.41	9.34	5.18	8.94	5.43	3.49
C926682	22.96	4.4	39.07	26.11	38.89	29.8	15.41
TR57394|c0_g1_i12	4.35	4.07	6.06	3.83	5.12	4.4	5.42
TR69072|c1_g4_i2	3.56	2.83	4.2	4.21	4.76	3.46	5.22
TR52312|c0_g1_i1	6.17	4.98	11.59	10.09	11.8	4.92	7.41
Mj_1_GCCAAT_L005_R1_001_(paired)_trimmed_(paired)_contig_12658	6.68	8.89	12.29	11.28	15.4	7.85	13.75
TR75057|c1_g1_i1	1.32	0.21	5.4	5.32	9.44	2.01	7.8
TR70043|c0_g1_i1	13.22	7.59	12.27	8.75	13.53	9.88	10.66
TR77393|c0_g1_i4	5.99	2.58	6.54	4.48	6.27	5.34	3.89
TR69703|c0_g2_i1	2.22	2.24	5.07	5.79	8.09	4.43	4.99
TR69266|c0_g1_i3	10.4	16.22	5.61	7.58	10.72	11.34	11.55
Mj_1_GCCAAT_L005_R1_001_(paired)_trimmed_(paired)_contig_28913	6.22	10.61	12.82	13.56	15.96	13.57	18.58
TR79441|c1_g1_i1	25.68	12.6	39.4	39.17	30.33	19.22	36.5
TR60129|c0_g1_i3	3.44	2.68	6.74	2.15	6.71	2.55	3.09
TR60129|c0_g1_i5	7.18	4.28	8.85	6.25	7.4	3.37	4.88
TR56853|c0_g1_i1	7.73	7.22	11.65	10.7	14.76	9.75	11.71
TR56853|c0_g1_i2	6.53	4.48	6.22	7.76	9.67	7.18	7.26
Mj_1_GCCAAT_L005_R1_001_(paired)_trimmed_(paired)_contig_7902	8.26	20.28	13.74	3.29	4.49	11.27	4.69
TR59008|c0_g1_i1	34.9	34.1	75.98	60.69	79.85	49.93	58.76
TR77271|c0_g2_i2	7.12	5.47	8.38	4.94	8.03	5.33	6.99
Mj_1_GCCAAT_L005_R1_001_(paired)_trimmed_(paired)_contig_7431	95.16	48.35	146.06	82.42	115.32	86.48	83.9
TR67261|c0_g3_i2	9.91	7.87	16.57	9.25	15.32	12.04	13.02
TR67261|c0_g3_i4	6.29	5.27	9.69	6.61	10.59	8.64	9.09
TR67261|c0_g3_i7	7.09	3.9	12.11	6.97	8.56	6.9	8.24
TR71731|c0_g2_i3	9.19	6.07	13.19	11.33	18.33	12.03	10.73
TR71731|c0_g4_i4	8.65	6.11	19.17	9.14	14.13	9.58	8.52
TR70892|c2_g1_i1	5.86	3.76	7.16	7.34	6.25	5.26	8.23
TR77023|c1_g2_i1	116.79	76.88	180.65	119.92	153.73	111.68	113.42
TR72989|c1_g2_i3	4.11	2.92	9.48	5.99	7.88	6.24	6.48
scaffold1304	7.97	4.49	11.71	10.26	11.21	9.04	9.71
Mj_1_GCCAAT_L005_R1_001_(paired)_trimmed_(paired)_contig_22032	6.1	3.88	3.19	3.44	2.84	4.52	3.34
TR68818|c0_g2_i6	10.51	7.85	10.88	8.67	11.19	10.28	9.66
TR49070|c0_g1_i1	90.59	50.88	103.44	72.14	95.32	60.46	70.74
TR75786|c0_g2_i1	11.31	17.88	5.35	9.4	7.76	13.58	7.14
TR49287|c0_g1_i1	248.35	92.36	376.29	251.62	403.06	299.52	283.02
TR61422|c1_g1_i4	92.84	38.7	147.81	97.98	129.6	86.17	78.46
TR52581|c0_g1_i2	3.7	3.82	4.9	4.64	5.53	4.27	4.4
TR52581|c0_g1_i3	4.9	3.54	6.29	4.71	7.1	5.44	6.14
TR54233|c0_g1_i1	11.08	9.74	24.62	17.85	21.35	15.65	14.44
TR69782|c0_g3_i3	5.38	4.13	7.6	5.52	8.79	7.12	5.29
TR78626|c1_g2_i2	7.45	5.3	10.25	8.29	11.45	8.4	5.32
TR68851|c0_g1_i2	3.64	3.4	4.83	5.06	5.67	3.99	4.58
TR68851|c0_g1_i4	3.58	2.18	4.4	3.76	5.49	3.06	2.33
Mj_1_GCCAAT_L005_R1_001_(paired)_trimmed_(paired)_contig_7105	1.59	3.29	43.33	17.74	41.02	24.05	5.86
TR63223|c0_g1_i2	4.58	4.85	13.9	9.14	11.47	7.72	8.29
TR72388|c3_g1_i3	4.5	2.69	8.38	4.45	8.39	6.02	7.01
TR69332|c0_g1_i3	2.36	1.79	4.59	3.97	5.16	3.5	4.28
TR56974|c0_g1_i1	9.6	6.11	25.23	8.62	16.66	5.72	10.3
TR60968|c0_g1_i1	5.62	4.65	8.79	5.3	7.66	6.18	5.92
TR65441|c1_g2_i6	9.4	5.97	5.43	5.72	4.11	8.54	6.46
TR52486|c0_g1_i2	1.9	4.13	7.93	5.75	9.54	0.77	5.79
TR68267|c0_g1_i1	5.51	3.54	5.16	5.93	6.44	5.52	6.91
C924310	8.25	7.69	2.3	4.12	3.24	7.93	4.27
TR55975|c2_g2_i5	5.94	12.58	3.41	3.68	4.12	8.04	5.85
TR50737|c0_g1_i1	83.76	82.39	260.65	201.78	351.36	136.56	159.04
Mj_1_GCCAAT_L005_R1_001_(paired)_trimmed_(paired)_contig_2695	24.5	20.22	40.07	41.25	49.8	31.5	41.5
TR78300|c1_g1_i1	4.3	2.62	9.89	4.33	7.57	4.76	4.81
TR62005|c0_g1_i1	18.76	10.73	26.62	20.79	24.25	21.35	15.13
TR53233|c0_g1_i1	26.26	17.26	33.98	30.46	36.5	27.23	32.22
TR78868|c0_g1_i7	5.77	4.23	2.86	3.58	1.31	3.79	4.03
TR63963|c0_g1_i3	3.97	3.35	5.39	3.93	6.65	4.94	4.13
TR58156|c0_g1_i3	2.32	0.52	8.02	4.11	5.5	0.61	1.75
TR59001|c0_g1_i1	3.68	0.68	12.52	3.25	10.58	1.14	2.42
TR59001|c0_g1_i3	1.94	0.51	5.6	1.4	5.79	0.98	2.26
TR59001|c0_g1_i4	2.8	0.6	11.5	2.3	7.74	1.31	2.5
Mj_1_GCCAAT_L005_R1_001_(paired)_trimmed_(paired)_contig_623	25.07	15.26	40.04	36.23	36.97	27.31	26.1
TR47134|c0_g1_i1	5.97	5.24	14.34	9.68	12.7	7.71	6.6
TR69362|c0_g1_i1	18.4	8.69	21.54	11.18	19.76	18.94	9.28
TR62336|c0_g1_i1	10.9	9.31	37.77	18.32	32.22	21.64	16.25
TR62336|c0_g1_i2	11.97	11.02	34.7	15.36	26.85	20.38	17.18
TR63661|c0_g1_i2	13.93	7.16	15.31	10.2	12.81	10.36	10.56
Mj_1_GCCAAT_L005_R1_001_(paired)_trimmed_(paired)_contig_14448	7.01	1.64	20.16	13.3	31.35	9.19	7.37
TR58461|c0_g1_i1	6.16	1.95	15.71	15.88	30.84	8.83	6.81
TR63878|c0_g1_i1	30.85	17.47	31.18	26.23	28.9	26.82	19.3
Mj_1_GCCAAT_L005_R1_001_(paired)_trimmed_(paired)_contig_24030	0.25	1.19	5.25	1.57	5.16	1.37	1.46
TR79200|c5_g1_i7	0.71	2.38	5.59	2.83	6.4	2.77	1.52
TR69819|c0_g1_i5	2.31	2.69	4.98	4.69	6.34	2.57	7.22
TR48894|c0_g1_i1	248.85	143.36	349.14	305.62	329.91	261.83	211.76
TR66429|c0_g1_i2	7.19	6.73	14.92	11.65	13.39	10.96	10.55
TR71923|c1_g2_i5	7.9	7.32	13.96	5.79	15.5	7.78	13.59
TR49254|c0_g1_i4	17.97	16.19	54.99	25.79	46.22	27.14	22.4
TR49254|c0_g1_i5	17.79	17.74	57.1	35.52	50.01	37.88	28.97
TR66626|c0_g1_i2	9.36	7.94	14.88	10.47	14.62	11	8.37
scaffold11775	6.12	6.61	10.44	7.91	10.36	8.74	7.52
TR57685|c0_g1_i2	4.28	2.96	4.41	5.62	5.94	3.45	6.02
TR69418|c0_g4_i2	7.36	4.78	8.94	6.81	12.26	8.4	10.84
TR74170|c0_g1_i8	3.3	2.57	5.52	3.46	4.95	4.55	2.49
TR74170|c1_g1_i5	3.47	2.53	7.39	2.36	6.67	4.77	4.89
Mj_1_GCCAAT_L005_R1_001_(paired)_trimmed_(paired)_contig_2940	9.93	13.04	8.18	7.71	8.3	10.45	6.99
TR65156|c0_g1_i1	18.75	27.02	20.19	17.95	14.95	19.65	13.34
TR65156|c0_g1_i3	21.84	24.99	17.73	18.27	13.81	19.81	12.43
TR78161|c0_g1_i2	22.54	22.89	27.76	28.5	34.4	28.89	31.69
TR53341|c0_g1_i1	26.77	14.89	47.59	50.29	42.79	38.9	25.35
Mj_1_GCCAAT_L005_R1_001_(paired)_trimmed_(paired)_contig_7712	3.01	3.12	11.59	5.66	12.95	9.43	6.17
TR62335|c0_g1_i1	29.82	22.58	37.83	38.01	32.97	34.39	26.62
TR66033|c0_g1_i3	7.48	3.51	8.46	6.19	8.47	5.96	5.14
TR66033|c0_g1_i7	6.48	2.66	9.22	5.65	8.06	5.46	3.73
TR55220|c0_g1_i1	4.27	7.99	3.45	4.67	4.2	5.28	6.59
TR66712|c0_g2_i1	6.46	3.72	2.62	2.48	2.34	5.33	2.31
TR79067|c3_g3_i6	7.41	3.54	5.67	6.16	7.46	4.93	6.39
Mj_1_GCCAAT_L005_R1_001_(paired)_trimmed_(paired)_contig_2909	4.39	2.71	8.94	6.34	11.96	4.97	4.75
Mj_1_GCCAAT_L005_R1_001_(paired)_trimmed_(paired)_contig_5527	4.01	2.43	8.54	5.72	6.33	2.54	3.89
TR59352|c1_g1_i1	5.78	6.61	10.07	7.9	10.74	11.32	12.55
TR66259|c0_g1_i1	4.38	2.77	7.54	5.9	11.28	4.42	6.7
TR67574|c0_g2_i1	7.46	6.08	19.01	15.66	23.39	12.08	14.25
TR61455|c0_g1_i8	1.77	2.45	6.03	5.3	7.34	5.01	5.62
TR61476|c0_g1_i1	4.01	3.94	5.77	6.49	5.93	4.05	6.99
TR53283|c0_g1_i6	7.97	4.92	8.83	9.5	12.81	8.08	14.34
TR70055|c2_g1_i3	5.92	4.83	10.98	7.56	8.9	7.48	8.39
TR59809|c0_g1_i1	8.49	7.16	10.83	9.72	11.42	7.69	9.35
TR59809|c0_g1_i2	5.02	4.46	6.76	6.2	8.33	4.71	8.41
TR61950|c0_g1_i3	7.55	5.88	10	9.01	11.98	6.79	11.19
TR76939|c4_g5_i2	20.43	19.36	41.17	40.15	43.08	35.03	29.22
TR64981|c0_g1_i2	4.8	4.34	6.17	5.06	6.81	6.12	6.44
TR64809|c0_g1_i2	6.36	4.78	8.18	6.4	7.04	5.41	6.95
TR58302|c0_g1_i3	3.32	2.85	7.82	3.96	5.61	3.98	4.76
TR63038|c0_g1_i1	10.42	8.24	12.37	10.4	15.64	11.41	10.99
Mj_1_GCCAAT_L005_R1_001_(paired)_trimmed_(paired)_contig_7866	3.79	2.79	4.84	5.7	5.46	4.05	4.27
Mj_1_GCCAAT_L005_R1_001_(paired)_trimmed_(paired)_contig_12879	1.89	6.35	2.09	2.07	2.13	3.69	4.91
TR67462|c0_g1_i2	3.54	3.23	6.25	4.73	6.41	5.88	6.11
TR63869|c0_g1_i1	24.57	23.97	48.09	34.76	53.05	36.01	42.75
Mj_1_GCCAAT_L005_R1_001_(paired)_trimmed_(paired)_contig_12881	6.81	12.02	2.97	8.94	4.21	12.91	6.93
TR59218|c0_g1_i3	14.44	13.07	21.69	12.27	21.07	13.71	13.52
TR61168|c0_g1_i6	3.66	7.3	8.61	2.64	10.67	7	7.7
TR78614|c1_g3_i3	10.43	13.65	7.27	7.75	6.98	11.3	8.38
Mj_1_GCCAAT_L005_R1_001_(paired)_trimmed_(paired)_contig_2949	5.57	4.44	9.56	11.58	14.92	10.72	11.87
TR66304|c0_g1_i5	7.84	12.34	1.99	5.37	6.67	11.95	8.94
Mj_1_GCCAAT_L005_R1_001_(paired)_trimmed_(paired)_contig_7204	15.85	6.91	36.79	18.76	32	20.89	21.67
C949772	10.07	6.93	11.25	6.48	11.26	7.65	8.8
TR65290|c0_g2_i1	12.17	3.89	15.29	12.81	17.28	11.93	6.38
TR76008|c0_g2_i2	21.56	14.5	28.32	21.07	25.94	26.4	18.38
TR56731|c0_g1_i1	31.46	21.82	32.68	33.14	39.09	27.3	35.63
TR70923|c2_g3_i1	7.67	5.33	16.53	10.91	15.52	12.51	8.17
TR50121|c0_g1_i1	4.29	8.02	1.52	4.51	0	7.49	2.64
TR44558|c0_g1_i2	9.09	9.66	17.27	10.73	13.8	9.53	14.99
Mj_1_GCCAAT_L005_R1_001_(paired)_trimmed_(paired)_contig_4703	13.72	10.63	15.03	12.07	15.53	15.23	18.24
TR76531|c0_g2_i4	13.47	20.39	7	11.87	9.79	14.54	8.64
TR66647|c0_g1_i3	5.53	6.21	4.09	4.29	3.41	5.06	4.84
scaffold11990	22.2	26.94	11.99	15.75	16.91	14.14	22.25
Mj_1_GCCAAT_L005_R1_001_(paired)_trimmed_(paired)_contig_4090	8.77	4.7	9.02	6.46	11.02	5.52	9.33
TR79706|c1_g5_i3	9.42	7.3	13.99	9.22	13.02	12.15	12.8
Mj_1_GCCAAT_L005_R1_001_(paired)_trimmed_(paired)_contig_2035	86.27	62.62	142.47	130.56	149.95	96.14	81.37
Mj_1_GCCAAT_L005_R1_001_(paired)_trimmed_(paired)_contig_15973	2.58	1.92	4.1	3.99	5.44	2.1	5.44
TR67185|c0_g1_i2	2.54	2.48	5.16	4.65	7.25	3.12	6.97
TR69401|c0_g1_i3	4.28	5.79	1.27	1.24	1.04	3.23	2.99
TR66695|c1_g5_i2	82.37	49.42	177.49	81.57	173.33	119.91	97.35
TR52757|c0_g1_i1	15.93	12.03	21.56	18.55	22.25	17.11	17.54
TR77558|c0_g1_i9	1.48	1.09	5.54	2.25	3.64	0.3	1.4
TR41713|c0_g2_i1	4.23	2.07	7.39	5.57	9.59	4.97	3.1
TR48850|c0_g1_i1	5.12	1.82	7.85	6.43	11.23	5.29	3.64
Mj_1_GCCAAT_L005_R1_001_(paired)_trimmed_(paired)_contig_12470	3.55	3.19	4.86	5.11	5.26	2.17	4.85
TR58595|c0_g1_i1	7.06	4.84	7.65	6.97	7.11	4.02	8.65
Mj_1_GCCAAT_L005_R1_001_(paired)_trimmed_(paired)_contig_12535	11.89	6.97	16.84	10.72	18.47	15.48	22.34
TR61948|c1_g1_i1	4.67	2.4	6.32	4.83	7.5	6.84	8.49
TR70947|c1_g1_i2	4.57	3.43	7.32	4.95	7.14	5.09	7.58
TR62509|c0_g1_i1	10.94	10.58	4.52	7.19	3.75	10.82	3.84
TR65699|c5_g3_i2	5.27	4.21	1.8	3.19	1.66	4.59	1.77
TR65699|c5_g3_i4	7.91	7.19	3.12	3.44	2.73	7.4	3.59
TR65699|c5_g3_i6	6.65	6.91	2.49	4	1.66	5.16	1.89
TR65890|c0_g1_i4	7.58	3.97	10.39	8.62	9.5	6.87	6.5
TR56796|c1_g1_i2	25.78	16	38.57	35.48	44.81	33.73	28.75
TR51926|c0_g1_i1	34.48	24.47	42.52	30.21	50.78	35.15	30.75
TR63433|c0_g1_i1	4.17	2.75	9.44	10.54	15.55	4.05	16.26
TR49406|c0_g1_i2	19.54	19.63	35.78	19.34	34.18	18.71	28.48
Mj_1_GCCAAT_L005_R1_001_(paired)_trimmed_(paired)_contig_8915	10.11	7.21	16.66	11.36	23.59	13.03	11.23
TR51863|c0_g1_i1	18.76	12.19	28.78	21.72	33.79	21.85	15.62
TR53949|c0_g1_i2	9.23	7.86	19.57	12.78	22.32	11.92	11.58
TR56554|c0_g1_i1	68.98	41.76	102.08	89.64	86.28	77.49	67.68
TR58980|c0_g1_i4	0.23	0.22	5.19	6.09	9.56	0.26	2.29
TR75852|c0_g1_i4	1.65	2.01	6.27	5.11	7.71	4.09	5.53
TR77161|c1_g2_i1	8.94	13.89	16.3	12.57	22.3	8.59	15.35
TR78254|c0_g1_i1	3.09	7.75	3.36	2.6	2.5	7.36	2.05
TR78254|c0_g1_i5	3.11	7.97	3.12	2.11	3.16	8.3	2.17
TR78254|c0_g1_i6	2.29	6.67	3.1	1.69	2.68	6.54	2.07
TR78254|c0_g1_i7	2.71	7.48	4.11	2.91	2.59	7.34	2.63
TR78262|c0_g1_i7	3.93	8.84	3.79	2.41	2.78	8.4	2.65
TR73501|c0_g2_i3	6.6	5.17	7.35	7.68	9.18	5.64	8.49
TR77328|c0_g3_i1	22.5	19.7	91.94	51.06	97.89	4.15	71.62
TR68332|c1_g1_i4	2.26	2.6	6.91	3.57	5.38	3.24	3.11
TR65988|c0_g1_i3	3.52	1.4	3.45	1.98	5.17	3.76	2.75
TR66002|c0_g1_i2	3.19	3.6	5.47	2.5	5.85	2.9	3.96
TR69168|c0_g1_i2	3.78	4.3	7.47	5.59	7.71	6.18	7.27
TR74944|c0_g3_i3	4.24	2.82	6.59	6.75	4.92	3.57	4.11
TR60454|c0_g2_i1	301.16	49.74	589.89	150.72	504.45	49.48	610.52
TR60673|c0_g1_i1	18.34	26.78	77.66	71.44	135.83	55.16	61.66
TR74643|c2_g1_i8	9.55	7.67	6.29	5.44	4.91	8.14	7.31
TR57964|c0_g1_i1	10.06	11.09	17.55	15.86	23.48	14.11	18.49
scaffold14358	11.67	26.85	5.05	7.57	8.26	12.27	19.36
TR68255|c0_g1_i2	6.16	3.72	4.23	3.8	3.16	5.92	3.39
TR68255|c0_g1_i4	7.06	3.88	4.53	3.75	3.28	6.6	3.57
TR62062|c0_g1_i4	5.84	2.97	5.8	5.62	5.8	4.3	3.49
TR59247|c0_g1_i1	16.95	16.05	42.16	17.38	34.2	20.85	33.8
TR71123|c1_g2_i2	12.14	11.8	29.28	15.13	30.48	21.44	33.83
TR67021|c1_g1_i6	4.81	3.51	6.08	3.62	6.49	5.47	5.06
scaffold11137	3.02	2.47	5.45	3.43	8.24	3.24	2.55
TR68238|c0_g2_i2	5.63	4.35	7.57	5.96	9.42	6.25	8.19
TR56658|c0_g1_i1	6.81	5.94	11.25	6.9	11.26	7.4	8.43
Mj_1_GCCAAT_L005_R1_001_(paired)_trimmed_(paired)_contig_11361	45.03	39.11	54.46	45.1	53.89	38.64	53.83
Mj_1_GCCAAT_L005_R1_001_(paired)_trimmed_(paired)_contig_2156	145.99	73.57	194.07	147.3	167.39	121.21	117.62
TR52952|c0_g1_i1	130.79	65.94	192.68	137.54	160.35	123.2	105.19
TR63224|c0_g2_i2	11.24	13.14	6.13	9.04	6.68	8.29	6.36
TR74224|c1_g1_i2	4.19	3.26	6.03	3.2	6.27	3.79	3.83
TR52508|c0_g1_i1	18.43	12.93	47.21	44.11	59.41	42	32.48
Mj_1_GCCAAT_L005_R1_001_(paired)_trimmed_(paired)_contig_752	31.96	21.33	61.31	36.87	49.72	34.95	33.03
TR59760|c0_g1_i1	24.16	18.19	36.17	35.75	40.5	30.67	22.89
TR69358|c0_g1_i2	14.49	12.63	26	21.33	24.34	20.78	19.71
TR70713|c0_g1_i5	11.6	11.71	22.12	20.46	22.93	17.48	16.48
TR76944|c2_g3_i2	22.96	16.83	31.18	27.21	28.97	27.39	24
TR19806|c0_g1_i1	63.26	52.68	127.53	91.91	111.48	92.77	84.36
TR60718|c0_g1_i1	9.42	10.31	7.1	11.78	7.34	10.76	8.93
TR67018|c0_g2_i2	10.72	8	16.99	13.61	17.15	11.8	13.98
scaffold13471	6.34	4.41	7.7	5.92	7.84	5.71	6.66
TR59050|c0_g1_i3	2.95	3.11	4.8	2.92	5.19	2.04	4.53
TR58430|c1_g1_i1	2.28	1.41	5	3.04	6.02	3.3	2.98
TR58430|c1_g1_i2	6.45	4.37	10.72	8.69	10.89	7.42	9.27
TR58430|c2_g1_i4	3.46	3.52	7.38	4.45	8.37	4.3	2.98
TR56557|c0_g1_i2	6.64	3.08	9.48	4.78	11.11	3.12	7.53
TR26097|c0_g1_i1	92.14	94.91	395.61	182.48	290.27	195.08	296.32
TR61075|c0_g1_i1	26.68	16.04	35.82	30.92	37.41	32.71	27.1
TR61937|c0_g1_i2	18.83	12.77	30.06	26.61	36	28.71	20.16
TR38835|c0_g2_i1	2.92	6.46	1.03	1.38	2.17	2.9	2.87
TR63045|c0_g1_i3	12.55	8.07	17.29	8.63	14.56	13.2	12.82
Mj_1_GCCAAT_L005_R1_001_(paired)_trimmed_(paired)_contig_51471	0.94	0.56	8.61	5.25	9.9	5.38	4.08
TR62639|c0_g1_i2	0.69	0.66	9.51	4.22	14.19	4.75	4.67
TR63918|c0_g1_i2	0.91	0.29	8.55	4.32	12.45	5.38	3.58
TR77842|c0_g2_i4	4.75	4.44	6.26	4.95	6.01	5.38	6.5
TR54034|c0_g1_i1	14	8.48	15.17	13.68	14.69	10.99	9.82
TR77287|c0_g1_i2	4.35	2.89	6.67	6.07	6.71	3.95	8.45
C963564	2	2.97	3.76	4.58	5.28	2.67	3.95
TR64816|c1_g1_i2	4.47	3.35	6.18	2.16	6.09	5.38	4.21
TR68558|c0_g1_i2	3.49	1.96	3.92	3.66	5.24	3.45	3.45
Mj_1_GCCAAT_L005_R1_001_(paired)_trimmed_(paired)_contig_25892	3.1	2.46	9.11	5.58	9.74	4.94	5.81
TR63474|c1_g1_i3	4.26	1.1	4.55	4.07	6.23	1.6	4.82
TR66336|c0_g1_i2	3.25	0.91	4.78	5.3	7.32	1.48	5.99
Mj_1_GCCAAT_L005_R1_001_(paired)_trimmed_(paired)_contig_1681	19.4	10.43	24.36	17.94	18.84	15.56	18.91
TR56943|c2_g1_i1	4.08	2.65	8.28	7.33	10.82	6.68	5.24
Mj_1_GCCAAT_L005_R1_001_(paired)_trimmed_(paired)_contig_25290	1.74	1.95	4.79	3.67	5.61	0.96	3.71
TR79909|c5_g1_i2	4.68	4.16	9.41	5.72	10.14	0.94	8.65
TR79371|c0_g11_i2	38.1	30.76	44.41	37	49.04	41.12	47.8
TR77087|c0_g1_i4	8.75	3.78	10.86	4.1	11.29	3.71	9.07
TR64914|c2_g4_i2	3.81	4.05	1.99	2.68	1.58	5.15	2.91
TR63735|c1_g1_i1	0.16	5.73	2.24	2.65	0	7.42	0.23
C954984	6.34	6.25	8.75	6.61	8.85	5.6	6.15
TR72552|c1_g1_i5	8.29	40.97	1.68	23.26	2.14	50.19	17.12
TR73389|c0_g1_i1	4.81	23.03	1.7	15.96	1.79	31.32	9.93
TR67921|c1_g2_i2	10.65	9.55	14.5	17.33	14.6	10.41	18.48
TR71733|c2_g5_i2	6.91	16.5	5.36	3.08	1.14	13.17	0.96
TR71733|c2_g5_i4	4.55	12.15	4.24	3.21	1.81	11.93	0.81
TR71733|c2_g5_i5	5.45	15.61	4.59	4.54	1.58	12.36	0.73
TR73265|c2_g1_i5	2.86	10.2	2.89	2.08	0.49	8.57	0.73
TR73265|c2_g1_i6	5.29	11.41	3.94	4.12	1.46	11.41	0.75
TR73265|c2_g1_i7	3.4	10.19	2.49	2.27	1.34	7.1	0.36
scaffold12849	3.49	11.22	4.02	2.43	1.42	9.08	0.65
scaffold14528	3.23	6.49	1.55	2.09	0.18	6.24	0.24
TR66709|c0_g1_i2	15.06	11.98	21.43	19.3	24.52	19.9	23.64
TR74940|c0_g1_i1	2.78	6.61	1.13	1.73	2.29	4.13	2.41
TR74940|c0_g1_i6	2.84	6.6	1.26	1.08	1.79	3.62	2.79
TR74940|c1_g1_i3	2.17	5.27	1.03	1.4	1.6	2.94	2.15
TR74940|c1_g1_i4	3.56	8.57	1.41	1.69	2.21	4.66	2.99
TR64217|c0_g1_i1	6.22	2.96	5.99	4.85	5.66	4.65	4.38
TR64217|c0_g1_i6	6.63	2.28	6.98	4.5	5.3	4.72	4.6
TR74049|c1_g1_i1	26.21	31.45	17.78	20.32	26.6	35.61	38.94
TR76871|c0_g2_i3	11.45	10.84	7.17	9.01	6.22	8.6	7.23
TR78538|c0_g2_i2	10.69	8.72	6.63	7.19	5.77	9.14	6.37
TR67458|c2_g1_i3	6.03	4.55	10.1	6.3	9.26	4.76	6.11
TR75471|c0_g1_i2	3	1.82	6.21	5.21	6.41	4.25	4.4
TR76513|c0_g1_i3	8.21	4.73	14.51	11.24	12.08	7.87	5.87
TR56473|c0_g1_i2	11.65	9.13	12.3	13.5	15.5	9.08	14.51
TR75103|c1_g2_i1	2.42	1.42	19.48	11.49	16.65	9.48	9.34
TR79360|c1_g3_i14	3.66	4.53	13.91	4.07	11.5	2.17	5.05
TR79626|c4_g2_i3	11.48	12.68	24.45	12.71	22.01	10.18	12.73
TR79626|c4_g4_i1	3.16	2.81	9.89	3.64	7.85	2.79	5.17
TR67841|c1_g2_i3	7.8	4.82	5.01	6.62	7.62	6.11	7.66
TR60331|c0_g1_i1	8.2	5.31	12.75	9.79	15.39	12.34	17.02
scaffold11726	1.61	1.47	4.36	4.03	6.4	4.34	6.41
TR52239|c0_g2_i1	20.55	16.26	24.19	22.73	20.62	19.56	23.23
TR46664|c0_g1_i1	288.21	136.35	419.39	299.87	376.23	359.45	200.4
Mj_1_GCCAAT_L005_R1_001_(paired)_trimmed_(paired)_contig_2768	116.25	79.75	167.6	145.9	153.44	122.02	160.68
TR66479|c1_g1_i2	17.48	6.78	24.97	16.48	21.25	14.02	9.42
TR67484|c2_g2_i1	28.04	9.98	28.05	25.79	26.68	19.81	15.72
TR70339|c0_g2_i1	4.89	3.31	8.19	4.09	7.95	5.26	5.64
TR60827|c0_g1_i1	19.57	15.58	32.64	28.46	41.18	26.05	19.77
TR72268|c0_g3_i1	53.23	47.23	75.59	76.24	68.35	52.79	47.22
TR70493|c0_g1_i1	11.46	9.35	16.08	14.27	20.68	12.39	12.24
TR70493|c0_g1_i2	13.98	7.72	16.2	16.41	25.44	14.32	14.02
TR76605|c1_g3_i1	7.71	5.13	8.25	7.96	7.66	5.46	3.74
TR76605|c1_g3_i2	5.28	3.79	6.89	6.19	5.89	4.57	3.17
Mj_1_GCCAAT_L005_R1_001_(paired)_trimmed_(paired)_contig_607	7.52	6.06	9.44	6.36	8.98	5	6.75
TR57815|c0_g1_i1	12.67	13.81	21.3	17.45	21.14	10.46	16.91
TR57815|c0_g1_i3	12.64	7.8	16.86	14.34	17.84	10.97	14.01
TR78505|c1_g3_i3	0.45	8.88	0.35	2.8	0	8.06	0.81
TR44826|c0_g1_i1	5.47	4.3	12.18	8.66	11.07	9.08	9.23
TR68723|c0_g1_i2	6.37	6.26	3.31	3.17	2.37	6.5	4.4
TR73583|c0_g1_i1	3.96	2.17	6.49	4	7.54	2.27	7.22
C928656	35.71	16.99	59.87	38.03	40.02	27.7	42.92
TR66264|c2_g1_i1	149.64	74.9	186.87	166.39	183.56	134.58	128.53
TR76495|c1_g4_i2	7.72	6.06	13.1	11.01	12.59	10.87	6.84
TR71873|c0_g1_i1	3.91	2.91	5.24	4.26	4.49	4.24	4.25
TR56885|c0_g1_i1	16.88	16.93	55.12	36.07	44.16	29.84	30.14
TR69955|c0_g1_i3	7.84	5.94	5.09	5.86	4.38	7.15	5.03
TR69955|c0_g1_i4	8.08	6.74	5.19	4.95	4.05	8.06	5.43
TR72281|c0_g2_i7	5.92	5.15	3.8	4.42	3.47	6.48	4.45
TR76767|c2_g7_i4	3.83	2.53	5.01	4.23	4.62	4.38	3.25
TR64777|c0_g1_i7	0.2	0.63	7.08	4.47	5.9	4.27	0.65
TR64777|c0_g1_i8	0.24	0.46	6.81	4.27	7.96	3.8	0.6
TR49846|c0_g1_i1	24.31	20.86	42.25	26.9	35.98	28.85	25.28
C972192	2.64	2.68	6.69	7.44	10.22	7.64	10.65
TR64980|c0_g1_i3	1.48	2.6	6.01	4.93	7.61	4.75	8.15
TR65979|c0_g1_i2	2.4	2.71	6.35	6.58	9.2	7.54	9.63
TR66785|c0_g1_i5	1.24	2.54	5.22	4.8	5.99	2.77	4.03
TR78214|c0_g1_i1	5.01	3.77	3.48	2.86	2.43	4.39	3.83
TR66447|c0_g1_i11	4.57	2.69	3.88	3.32	5.21	4.13	3.77
Mj_1_GCCAAT_L005_R1_001_(paired)_trimmed_(paired)_contig_24041	48.04	57.81	111.65	79.96	140.37	90.89	106.88
TR63487|c0_g1_i3	3.92	1.87	5	2.59	5.37	3.08	3.7
TR74013|c0_g2_i3	116.85	85.42	179.39	158.99	162.15	156.71	126.56
TR74948|c1_g5_i3	62.12	39.39	109.45	74.08	99.3	66.15	58.44
TR74948|c1_g5_i4	48.88	43.74	90.68	80.25	85.48	82.57	50.14
TR42800|c0_g1_i1	4.47	2.21	5.08	5.14	6.23	3.6	3.19
TR74343|c1_g5_i1	5.06	3.65	7.41	5.1	9.06	4.25	5.24
TR58594|c0_g1_i1	7.17	9.03	15.05	18.01	15.72	10.52	21.07
Mj_1_GCCAAT_L005_R1_001_(paired)_trimmed_(paired)_contig_57039	0.18	0.67	2.91	3.92	5.01	0.98	2.09
Mj_1_GCCAAT_L005_R1_001_(paired)_trimmed_(paired)_contig_2075	10.01	8.99	7.28	7.21	5.22	6.74	4.62
TR71356|c0_g1_i1	13	12.72	8.68	12.66	7.39	9.08	5.94
TR63600|c1_g1_i1	1.92	0	5.66	2.62	6.99	2.75	4.61
TR63600|c1_g1_i2	1.6	0.14	6.07	2.32	6.55	3	3.23
TR66520|c0_g1_i1	1.48	0.18	6.11	4.11	9.4	5.75	7.48
Mj_1_GCCAAT_L005_R1_001_(paired)_trimmed_(paired)_contig_1687	4.59	5.18	19.4	14.49	17.51	18.38	31.5
Mj_1_GCCAAT_L005_R1_001_(paired)_trimmed_(paired)_contig_4248	15.14	13.68	9.86	13.63	8.94	13.15	11.31
TR76635|c0_g2_i2	17.64	16.73	13.76	16.5	13.48	17.03	13.13
Mj_1_GCCAAT_L005_R1_001_(paired)_trimmed_(paired)_contig_5227	33.99	17.48	53.03	33.45	47.97	34.73	38.28
TR61422|c0_g1_i2	36.36	24.06	56.86	34.99	48.86	34.66	44.51
TR61422|c1_g1_i2	46.92	27.42	63.46	44.11	55.26	43.54	47.87
TR61409|c0_g1_i1	1.69	1.02	5.95	1.7	5.73	2.21	2.72
TR61409|c0_g1_i3	4.42	1.16	7.53	5.56	7.06	6.59	3.6
TR79254|c1_g2_i2	5.21	2.95	4.75	4.57	5.02	3.92	3.53
TR49933|c1_g1_i1	4.5	4.95	9.48	7.37	13.48	6.52	7.13
TR50977|c0_g2_i2	15.06	14.87	19.7	12.47	18.49	12.06	11.87
Mj_1_GCCAAT_L005_R1_001_(paired)_trimmed_(paired)_contig_1046	6.16	8.98	1.91	6.68	3.63	7.91	7.5
TR61963|c1_g2_i1	16.43	23.74	8.48	18.43	13.61	17.59	19.83
TR74129|c0_g1_i1	1.71	8.43	6.02	2.99	4.87	8.44	3.2
TR64639|c0_g2_i2	2.89	3.32	5.16	3.01	4.33	3.77	4.62
C961004	6.56	4.14	8.87	5.78	8.91	7.41	6.74
TR67393|c0_g2_i1	3.88	2.79	5.54	2.54	4.69	4.26	4.34
TR42024|c1_g1_i1	133.76	70.04	174.19	126.85	147.01	95.77	97.54
TR65951|c0_g1_i3	5.21	3.95	7.64	5.92	7.01	6.27	7.14
TR66741|c0_g1_i2	4.64	2.8	8.12	5.21	7.79	5.79	8.93
TR66741|c0_g1_i3	5.12	4.67	8.41	5.76	10.38	6.41	8.21
TR74784|c0_g4_i4	8.97	5.29	9.48	5.46	10.96	6.86	7.92
TR77304|c1_g1_i7	2.86	2.75	6.74	4.94	9.29	5.74	7.68
scaffold12519	6.77	6.96	14.1	8.69	14.42	8.83	15.42
TR53680|c0_g1_i2	4.6	3.76	8.41	4.78	8.74	5.23	7.24
TR66540|c0_g1_i3	11.87	7.45	16.04	16.51	16.49	9.7	17.8
TR67836|c0_g1_i3	10.55	5.95	11.54	9.85	14.62	8.56	12.62
TR61373|c0_g1_i3	36.16	24.38	24.3	24.97	20.04	31.74	24.16
Mj_1_GCCAAT_L005_R1_001_(paired)_trimmed_(paired)_contig_1385	32.84	52.05	14.83	19.12	18.68	29.03	16.86
TR74565|c0_g1_i3	15.21	26.45	9.4	8.02	12.26	20.12	9.2
TR78222|c0_g1_i2	44.81	75.45	22.29	29.53	28.16	44.32	24.93
TR72875|c0_g1_i1	27.04	10.17	48.99	34.88	34.61	13.66	19.13
TR77431|c1_g1_i1	18.94	12.79	27.82	18.46	25.54	13.55	23.78
TR72811|c1_g1_i5	5.8	4.51	7.67	6.82	7.9	5.27	5.82
TR72238|c0_g2_i3	3.06	6	3.03	3.32	2.16	5.71	2.38
TR76296|c0_g1_i1	4.68	4.62	6.28	4.85	6.17	4.79	5.83
TR69404|c0_g1_i3	1.41	1.5	4.59	4.3	4.62	5.01	7.51
TR69404|c0_g1_i4	0.79	1.26	4.56	3.78	6.21	4.41	6.34
TR47806|c0_g1_i2	31.99	27.02	46.66	49.31	52.01	36.64	48.68
TR52040|c0_g1_i1	48.44	41.72	78.47	80.89	105.88	78.94	89.83
Mj_1_GCCAAT_L005_R1_001_(paired)_trimmed_(paired)_contig_6014	5.64	3.11	4.02	5.05	5.95	3.98	4.55
TR67848|c1_g1_i3	4.7	4.78	6.69	5.48	7.65	7.08	7.52
[truncated: 621 more rows]

## Sheet: TransM6
Table S11 Summary of transcript modules and the included transcripts using WCNA analysis for highly expressed transcripts in Mallotus japonicus.
[truncated: 2,423 more rows]
[truncated: 1 more columns]

[truncated: 11 more sheets: TransM7, TransM8, TransM9, TransM10, TransM11, TransM12, TransM13, TransM14, TransM15, TransM16, Summary_of_all_WCNA_clusters]
