# Supplementary material for: Gene-Metabolite Network Analysis Revealed Tissue-Specific Accumulation of Therapeutic Metabolites in Mallotus japonicus
Source: Int J Mol Sci. 2021 Aug 17;22(16):8835. doi: 10.3390/ijms22168835 (PMC8396295; doi:10.3390/ijms22168835)
Supplement: Supplementary file 1 [file ijms-22-08835-s001.zip › Supplementary_Table S12_Correlation_calculation_between_transcript_and_metabolite_module with legend.xlsx]

## Sheet: For_correlation_of_transcript_m
Table S12 Pearson correlation coefficient (PCC) between each transcript and metabolite modules identified in Mallotus japonicus.
Cluster	Young_leaf	Mature_leaf	Young_Stem	Mature_Stem	Bark	Central_Cylinder	Inflorescence
TransM16	4.8678	5.25943	7.02927	20.9069	18.6518	7.02354	17.724
TransM15	4.43797	7.71462	6.60331	15.4662	29.5484	8.29711	6.92025
TransM14	8.76073	7.88478	13.5025	15.4869	14.2509	18.6631	20.9504
TransM13	20.7034	17.8783	19.1982	18.6257	20.0491	18.2585	20.1729
TransM12	7.36842	6.14486	9.07847	8.46158	11.5253	6.48151	25.0259
TransM11	10.3547	8.62996	9.36485	9.31548	9.32176	12.0695	10.4192
TransM10	7.08928	6.70204	10.6301	39.6282	26.5489	15.6879	11.1962
TransM9	13.5378	15.3264	13.5827	13.4885	13.1686	11.9692	13.1871
TransM8	14.123	13.5463	32.635	13.2033	13.345	10.1563	16.6491
TransM7	13.5697	11.1937	17.2526	7.67118	8.23158	6.57855	21.3991
TransM6	26.1979	9.83952	15.9326	9.4069	10.0441	8.91441	13.3062
TransM5	21.3219	15.4021	34.4066	25.5381	34.215	23.5097	24.4313
TransM4	43.6721	59.1029	16.4322	10.1812	10.8388	9.31735	18.0592
TransM3	9.10755	8.91329	11.8326	18.9241	17.704	26.193	12.5272
TransM2	14.1487	13.2156	28.6444	24.016	19.8031	26.3045	16.6608
TransM1	9.23816	9.40592	16.8029	14.3612	16.3994	8.29034	8.36469
MetM7	13365.6	15032.1	2620.21	678.847	698.388	440.353	2108.99
MetM6	887.062	1033.66	3077.62	11257.6	21991.7	5099.46	1984.48
MetM5	8874.2	8390.55	9922	4744.45	8676.9	1152.25	2982.8
MetM4	509.2	414.8	626.5	3467.7	3612.4	453.9	3671
MetM3	31793.2	22478.4	48302.4	1890.67	681.367	297.867	2445.93
MetM2	1350.46	1036.64	390.352	386.343	312.867	174.981	5932.03
MetM1	270.333	249.8	96.2667	304.467	162.133	96.6667	182.6

## Sheet: Corr_value_between_2_modules
Table S12 Pearson correlation coefficient (PCC) between each transcript and metabolite modules identified in Mallotus japonicus.
Variable 1	Variable 2	Correlation coefficient value
TransM3	TransM3	1
TransM3	TransM14	0.62
TransM3	TransM11	0.61
TransM3	TransM10	0.56
TransM3	TransM15	0.36
TransM3	TransM16	0.31
TransM3	TransM5	0.24
TransM3	TransM12	-0.15
TransM3	TransM13	-0.34
TransM3	TransM8	-0.4
TransM3	TransM6	-0.59
TransM3	TransM7	-0.64
TransM3	TransM4	-0.74
TransM3	TransM9	-0.78
MetM1	MetM1	1
MetM1	TransM9	0.52
MetM1	MetM7	0.5
MetM1	TransM4	0.47
MetM1	TransM10	0.28
MetM1	TransM16	0.21
MetM1	TransM6	0.21
MetM1	MetM4	0.21
MetM1	MetM5	0.15
MetM1	TransM13	0.06
MetM1	MetM2	0.06
MetM1	TransM15	-0.01
MetM1	MetM6	-0.05
MetM1	MetM3	-0.1
MetM1	TransM12	-0.11
MetM1	TransM7	-0.14
MetM1	TransM1	-0.16
MetM1	TransM3	-0.38
MetM1	TransM8	-0.42
MetM1	TransM11	-0.44
MetM1	TransM14	-0.45
MetM1	TransM5	-0.54
MetM1	TransM2	-0.59
MetM7	MetM7	1
MetM7	TransM4	0.99
MetM7	TransM9	0.74
MetM7	TransM6	0.5
MetM7	TransM7	0.12
MetM7	TransM13	-0.01
MetM7	TransM8	-0.11
MetM7	TransM11	-0.32
MetM7	TransM12	-0.34
MetM7	TransM1	-0.42
MetM7	TransM15s	-0.46
MetM7	TransM10	-0.62
MetM7	TransM16	-0.65
MetM7	TransM5	-0.7
MetM7	TransM3	-0.73
MetM7	TransM2	-0.75
MetM7	TransM14	-0.84
MetM6	MetM6	1
MetM6	TransM15s	0.99
MetM6	TransM10	0.74
MetM6	TransM16	0.67
MetM6	TransM1	0.64
MetM6	TransM5	0.6
MetM6	TransM3	0.46
MetM6	TransM2	0.22
MetM6	TransM14	0.17
MetM6	TransM13	0.12
MetM6	TransM12	-0.02
MetM6	TransM11	-0.21
MetM6	TransM8	-0.24
MetM6	TransM9	-0.26
MetM6	TransM6	-0.44
MetM6	TransM7	-0.54
MetM6	TransM4	-0.55
MetM6	MetM7	-0.55
TransM4	TransM4	1
TransM4	TransM9	0.8
TransM4	TransM6	0.38
TransM4	TransM7	0.15
TransM4	TransM13	-0.1
TransM4	TransM8	-0.11
TransM4	TransM12	-0.28
TransM4	TransM11	-0.38
TransM4	TransM15s	-0.44
TransM4	TransM16	-0.62
TransM4	TransM10	-0.63
TransM4	TransM5	-0.73
TransM4	TransM14	-0.8
TransM1	TransM1	1
TransM1	TransM5	0.82
TransM1	TransM15s	0.61
TransM1	TransM8	0.54
TransM1	TransM10	0.52
TransM1	TransM2	0.52
TransM1	TransM16	0.37
TransM1	TransM13	0.07
TransM1	TransM9	0.04
TransM1	TransM3	0.04
TransM1	TransM14	-0.09
TransM1	TransM7	-0.14
TransM1	TransM6	-0.15
TransM1	TransM12	-0.16
TransM1	TransM4	-0.43
TransM1	TransM11	-0.55
TransM2	TransM2	1
TransM2	TransM5	0.64
TransM2	TransM3	0.62
TransM2	TransM14	0.46
TransM2	TransM8	0.44
TransM2	TransM10	0.39
TransM2	TransM11	0.27
TransM2	TransM16	0.11
TransM2	TransM15s	0.1
TransM2	TransM12	-0.19
TransM2	TransM7	-0.21
TransM2	TransM13	-0.3
TransM2	TransM6	-0.32
TransM2	TransM9	-0.57
TransM2	TransM4	-0.76
TransM7	TransM7	1
TransM7	TransM12	0.71
TransM7	TransM8	0.59
TransM7	TransM13	0.48
TransM7	TransM9	0.18
TransM7	TransM14	0.17
TransM7	TransM16	-0.06
TransM7	TransM11	-0.09
TransM7	TransM15s	-0.5
TransM7	TransM10	-0.55
TransM6	TransM6	1
TransM6	TransM13	0.69
TransM6	TransM7	0.44
TransM6	TransM8	0.26
TransM6	TransM11	0.08
TransM6	TransM9	0.06
TransM6	TransM12	-0.03
TransM6	TransM14	-0.42
TransM6	TransM16	-0.44
TransM6	TransM15s	-0.46
TransM6	TransM10	-0.49
TransM5	TransM5	1
TransM5	TransM8	0.55
TransM5	TransM15	0.54
TransM5	TransM16	0.4
TransM5	TransM10	0.37
TransM5	TransM13	0.35
TransM5	TransM14	0.33
TransM5	TransM12	0.17
TransM5	TransM7	0.07
TransM5	TransM6	-0.06
TransM5	TransM11	-0.08
TransM5	TransM9	-0.43
TransM8	TransM8	1
TransM8	TransM9	0.15
TransM8	TransM13	0.12
TransM8	TransM12	0.1
TransM8	TransM14	-0.05
TransM8	TransM16	-0.19
TransM8	TransM15s	-0.26
TransM8	TransM10	-0.27
TransM8	TransM11	-0.31
MetM5	MetM5	1
MetM5	TransM9	0.61
MetM5	TransM1	0.54
MetM5	TransM8	0.5
MetM5	MetM7	0.49
MetM5	TransM4	0.46
MetM5	TransM6	0.44
MetM5	TransM13	0.26
MetM5	TransM5	0.25
MetM5	TransM15	0.14
MetM5	TransM7	0.14
MetM5	MetM6	0.08
MetM5	TransM2	-0.21
MetM5	TransM10	-0.23
MetM5	TransM16	-0.29
MetM5	TransM12	-0.33
MetM5	TransM3	-0.69
MetM5	TransM11	-0.72
MetM5	TransM14	-0.79
MetM4	MetM4	1
MetM4	TransM16	0.98
MetM4	TransM10	0.67
MetM4	TransM12	0.65
MetM4	TransM15	0.64
MetM4	MetM6	0.63
MetM4	TransM14	0.54
MetM4	TransM5	0.38
MetM4	TransM13	0.34
MetM4	TransM1	0.31
MetM4	TransM3	0.19
MetM4	TransM7	0.07
MetM4	TransM2	-0.03
MetM4	TransM11	-0.19
MetM4	TransM9	-0.19
MetM4	TransM8	-0.19
MetM4	MetM5	-0.24
MetM4	TransM6	-0.35
MetM4	TransM4	-0.53
MetM4	MetM7	-0.57
TransM11	TransM11	1
TransM11	TransM14	0.56
TransM11	TransM13	0.09
TransM11	TransM12	0.09
TransM11	TransM16	-0.18
TransM11	TransM15	-0.3
MetM3	MetM3	1
MetM3	TransM8	0.76
MetM3	MetM5	0.72
MetM3	TransM6	0.62
MetM3	MetM7	0.49
MetM3	TransM4	0.45
MetM3	TransM9	0.43
MetM3	TransM7	0.42
MetM3	TransM1	0.23
MetM3	TransM13	0.1
MetM3	TransM5	0.09
MetM3	TransM2	0.05
MetM3	TransM12	-0.32
MetM3	TransM11	-0.32
MetM3	TransM15s	-0.51
MetM3	MetM6	-0.51
MetM3	TransM10	-0.57
MetM3	TransM14	-0.6
MetM3	MetM4	-0.65
MetM3	TransM3	-0.66
MetM3	TransM16	-0.67
TransM9	TransM9	1
TransM9	TransM15s	-0.14
TransM9	TransM12	-0.17
TransM9	TransM16	-0.23
TransM9	TransM13	-0.23
TransM9	TransM10	-0.27
TransM9	TransM14	-0.73
TransM9	TransM11	-0.83
TransM12	TransM12	1
TransM12	TransM14	0.65
TransM12	TransM16	0.54
TransM12	TransM13	0.49
TransM12	TransM15	0.01
TransM10	TransM10	1
TransM10	TransM16	0.79
TransM10	TransM15s	0.68
TransM10	TransM14	0.31
TransM10	TransM12	-0.06
TransM10	TransM13	-0.13
TransM10	TransM11	-0.15
TransM13	TransM13	1
TransM13	TransM16	0.2
TransM13	TransM15	0.11
TransM13	TransM14	0.06
TransM14	TransM14	1
TransM14	TransM16	0.56
TransM14	TransM15	0.11
TransM15s	TransM15	1
TransM15s	TransM16	0.66
MetM2	MetM2	1
MetM2	TransM12	0.92
MetM2	TransM7	0.78
MetM2	TransM14	0.46
MetM2	TransM13	0.43
MetM2	MetM4	0.4
MetM2	TransM16	0.27
MetM2	TransM11	0.14
MetM2	TransM6	0.14
MetM2	TransM4	0.06
MetM2	TransM9	0.01
MetM2	TransM8	0
MetM2	MetM7	0
MetM2	TransM5	-0.2
MetM2	MetM3	-0.2
MetM2	TransM15	-0.31
MetM2	TransM10	-0.32
MetM2	TransM3	-0.34
MetM2	MetM5	-0.34
MetM2	MetM6	-0.36
MetM2	TransM2	-0.44
MetM2	TransM1	-0.48
TransM16	TransM16	1
