# Supplementary material for: Gene-Metabolite Network Analysis Revealed Tissue-Specific Accumulation of Therapeutic Metabolites in Mallotus japonicus
Source: Int J Mol Sci. 2021 Aug 17;22(16):8835. doi: 10.3390/ijms22168835 (PMC8396295; doi:10.3390/ijms22168835)
Supplement: Supplementary file 1 [file ijms-22-08835-s001.zip › Supplementary_Table S13_KEGG_pathway_mapping_for_highly_correlated_trans_modules_Megha.xlsx]

## Sheet: TransM4_KEGG
Table S13 KEGG pathway mapping of transcript modules sharing high correlation coefficient (PCC > 0.7) with the identified metabolite modules in Mallotus japonicus.
Pathway	Pathway ID	Enzyme	#Seqs of Enzyme	Seqs	#Enzs in Pathway	#KEGG Enzymes	Ratio of enzymes in our sample in kegg enzymes (%)
Carbon fixation in photosynthetic organisms	map00710	ec:1.1.1.82 - dehydrogenase (NADP+), ec:5.1.3.1 - 3-epimerase, ec:2.7.2.3 - kinase, ec:2.6.1.2 - transaminase, ec:2.7.1.19 - phosphopentokinase, ec:1.1.1.40 - dehydrogenase (oxaloacetate-decarboxylating) (NADP+), ec:3.1.3.37 - SBPase, ec:1.1.1.37 - dehydrogenase, ec:1.2.1.13 - dehydrogenase (NADP+) (phosphorylating), ec:4.1.1.31 - carboxylase, ec:5.3.1.1 - isomerase, ec:4.1.1.39 - carboxylase, ec…	1, 3, 3, 2, 1, 3, 2, 3, 5, 4, 2, 3, 3, 3, 9, 2, 5, 2, 8	TR65834|c0_g1_i1, scaffold11293, TR42759|c0_g1_i2, scaffold11292, TR64739|c0_g1_i1, scaffold12045, Mj_1_GCCAAT_L005_R1_001_(paired)_trimmed_(paired)_contig_1023, TR49718|c0_g1_i1, TR49718|c0_g1_i2, TR57612|c0_g1_i1, TR61942|c1_g1_i1, TR56860|c0_g1_i1, TR56860|c0_g1_i2, TR69583|c1_g1_i1, scaffold10980, Mj_1_GCCAAT_L005_R1_001_(paired)_trimmed_(paired)_contig_1051, TR67315|c5_g3_i1, TR65834|c0_g1_i…	19	25	76
Metabolism of xenobiotics by cytochrome P450	map00980	ec:1.1.1.184 - reductase (NADPH), ec:1.2.1.5 - dehydrogenase [NAD(P)+], ec:2.4.1.17 - 1-naphthol glucuronyltransferase, ec:1.14.14.1 - monooxygenase, ec:1.1.1.1 - dehydrogenase, ec:1.1.1.146 - dehydrogenase, ec:2.5.1.18 - transferase	3, 8, 1, 14, 13, 1, 11	TR56894|c1_g1_i1, TR56894|c0_g1_i1, Mj_1_GCCAAT_L005_R1_001_(paired)_trimmed_(paired)_contig_10168, TR56409|c0_g1_i2, TR68787|c0_g2_i1, TR68787|c0_g2_i2, TR67594|c2_g1_i3, TR67365|c0_g1_i1, TR67482|c3_g3_i2, TR67482|c3_g3_i4, Mj_1_GCCAAT_L005_R1_001_(paired)_trimmed_(paired)_contig_18843, TR41170|c0_g1_i1, TR65699|c5_g3_i5, TR77997|c0_g1_i6, Mj_1_GCCAAT_L005_R1_001_(paired)_trimmed_(paired)_conti…	7	10	70
Photosynthesis	map00195	ec:7.1.2.2 - two-sector ATPase, ec:1.18.1.2 - reductase	10, 4	TR50698|c0_g1_i1, TR68785|c0_g2_i1, TR51779|c0_g1_i2, TR50698|c0_g1_i2, TR51779|c0_g1_i1, TR60833|c0_g1_i3, C972548, Mj_1_GCCAAT_L005_R1_001_(paired)_trimmed_(paired)_contig_13159, Mj_1_GCCAAT_L005_R1_001_(paired)_trimmed_(paired)_contig_7433, TR52910|c0_g1_i2, Mj_1_GCCAAT_L005_R1_001_(paired)_trimmed_(paired)_contig_248, TR60639|c0_g1_i1, Mj_1_GCCAAT_L005_R1_001_(paired)_trimmed_(paired)_contig_…	2	3	66.6667
Aminoacyl-tRNA biosynthesis	map00970	ec:6.1.1.22 - ligase, ec:6.1.1.19 - ligase, ec:6.1.1.9 - ligase, ec:6.1.1.3 - ligase, ec:6.1.1.15 - ligase, ec:6.1.1.5 - ligase, ec:6.1.1.10 - ligase, ec:6.1.1.21 - ligase, ec:6.1.1.18 - ligase, ec:6.1.1.7 - ligase, ec:6.1.1.12 - ligase, ec:6.1.1.2 - ligase, ec:6.3.5.7 - synthase (glutamine-hydrolysing), ec:6.1.1.14 - ligase, ec:6.1.1.4 - ligase, ec:6.1.1.20 - ligase, ec:6.1.1.17 - ligase, ec:6.1…	4, 2, 4, 5, 3, 2, 7, 6, 1, 17, 1, 1, 8, 6, 7, 2, 1, 3, 5, 1	TR68013|c0_g1_i10, Mj_1_GCCAAT_L005_R1_001_(paired)_trimmed_(paired)_contig_8671, TR68013|c0_g1_i9, scaffold12831, TR74071|c0_g1_i1, Mj_1_GCCAAT_L005_R1_001_(paired)_trimmed_(paired)_contig_3917, Mj_1_GCCAAT_L005_R1_001_(paired)_trimmed_(paired)_contig_3443, TR77268|c0_g1_i4, TR77268|c0_g1_i3, TR77268|c0_g1_i2, scaffold11158, TR74703|c1_g1_i2, TR75771|c0_g1_i5, TR75771|c0_g1_i10, Mj_1_GCCAAT_L005…	20	31	64.5161
Drug metabolism - cytochrome P450	map00982	ec:1.2.1.5 - dehydrogenase [NAD(P)+], ec:2.4.1.17 - 1-naphthol glucuronyltransferase, ec:1.14.14.1 - monooxygenase, ec:1.1.1.1 - dehydrogenase, ec:2.5.1.18 - transferase	8, 1, 14, 13, 11	TR56409|c0_g1_i2, TR68787|c0_g2_i1, TR68787|c0_g2_i2, TR67594|c2_g1_i3, TR67365|c0_g1_i1, TR67482|c3_g3_i2, TR67482|c3_g3_i4, Mj_1_GCCAAT_L005_R1_001_(paired)_trimmed_(paired)_contig_18843, TR41170|c0_g1_i1, TR65699|c5_g3_i5, TR77997|c0_g1_i6, Mj_1_GCCAAT_L005_R1_001_(paired)_trimmed_(paired)_contig_2438, TR67306|c0_g1_i4, TR78194|c0_g1_i2, TR70581|c0_g1_i1, TR72750|c3_g1_i2, Mj_1_GCCAAT_L005_R1_…	5	8	62.5
Phosphatidylinositol signaling system	map04070	ec:2.7.1.67 - 4-kinase, ec:3.1.3.56 - 5-phosphatase, ec:2.7.7.41 - cytidylyltransferase, ec:3.1.3.67 - 3-phosphatase, ec:2.7.1.107 - kinase (ATP), ec:3.1.3.64 - inositol-1,3-bisphosphate 3-phosphatase, ec:3.1.4.11 - phospholipase C, ec:2.7.1.159 - 5/6-kinase, ec:3.1.3.36 - 5-phosphatase, ec:2.7.1.68 - 5-kinase, ec:2.7.11.13 - kinase C, ec:3.1.3.57 - 1-phosphatase, ec:2.7.1.150 - 5-kinase	1, 1, 7, 1, 2, 1, 2, 1, 2, 2, 4, 3, 2	TR61027|c0_g1_i1, TR62292|c0_g1_i3, TR61660|c0_g1_i1, TR61660|c0_g1_i2, TR57518|c0_g1_i2, TR57518|c0_g1_i3, TR57518|c0_g1_i4, TR69758|c1_g1_i3, TR69758|c1_g1_i14, TR69325|c0_g1_i2, Mj_1_GCCAAT_L005_R1_001_(paired)_trimmed_(paired)_contig_21766, TR71360|c1_g1_i1, TR76404|c2_g1_i1, Mj_1_GCCAAT_L005_R1_001_(paired)_trimmed_(paired)_contig_624, TR61283|c0_g1_i1, Mj_1_GCCAAT_L005_R1_001_(paired)_trimm…	13	29	44.8276
Glycolysis / Gluconeogenesis	map00010	ec:4.1.1.32 - carboxykinase (GTP), ec:1.2.1.3 - dehydrogenase (NAD+), ec:2.3.1.12 - acetyltransferase, ec:6.2.1.1 - ligase, ec:2.7.2.3 - kinase, ec:1.8.1.4 - dehydrogenase, ec:1.2.1.5 - dehydrogenase [NAD(P)+], ec:2.7.1.2 - glucokinase (phosphorylating), ec:1.1.1.2 - dehydrogenase (NADP+), ec:5.4.2.2 - (alpha-D-glucose-1,6-bisphosphate-dependent), ec:5.3.1.1 - isomerase, ec:2.7.1.11 - phosphohexo…	4, 10, 2, 4, 3, 1, 8, 1, 8, 10, 2, 1, 2, 2, 1, 6, 3, 9, 13, 5, 8	TR68854|c3_g5_i2, TR68854|c3_g5_i3, TR68854|c3_g5_i5, TR61942|c1_g1_i1, TR56409|c0_g1_i2, TR68787|c0_g2_i1, TR68787|c0_g2_i2, scaffold11904, TR67594|c2_g1_i3, scaffold11903, TR67365|c0_g1_i1, TR67482|c3_g3_i2, TR67482|c3_g3_i4, Mj_1_GCCAAT_L005_R1_001_(paired)_trimmed_(paired)_contig_18843, TR59869|c0_g1_i1, TR66245|c0_g1_i1, C972690, Mj_1_GCCAAT_L005_R1_001_(paired)_trimmed_(paired)_contig_15859…	21	47	44.6809
Drug metabolism - other enzymes	map00983	ec:2.7.1.48 - kinase, ec:3.1.1.1 - ali-esterase, ec:1.17.4.1 - reductase, ec:2.3.1.5 - N-acetyltransferase, ec:2.4.1.17 - 1-naphthol glucuronyltransferase, ec:2.4.2.8 - phosphoribosyltransferase, ec:2.7.4.6 - kinase, ec:2.5.1.18 - transferase	4, 43, 2, 5, 1, 1, 3, 11	TR78565|c2_g1_i4, TR78565|c2_g1_i2, TR78595|c0_g1_i1, TR78565|c2_g1_i5, TR60092|c0_g1_i1, TR65932|c1_g1_i2, TR79228|c1_g4_i5, TR60092|c0_g1_i2, TR66432|c0_g1_i2, TR78621|c1_g5_i3, TR66432|c0_g1_i4, TR60092|c0_g1_i5, Mj_1_GCCAAT_L005_R1_001_(paired)_trimmed_(paired)_contig_10101, TR65689|c0_g2_i11, Mj_1_GCCAAT_L005_R1_001_(paired)_trimmed_(paired)_contig_3443, TR64528|c0_g2_i1, Mj_1_GCCAAT_L005_R1…	8	18	44.4444
alpha-Linolenic acid metabolism	map00592	ec:2.3.1.16 - C-acyltransferase, ec:3.1.1.32 - A1, ec:1.3.1.42 - reductase, ec:1.1.1.1 - dehydrogenase, ec:4.2.1.17 - hydratase	1, 1, 1, 13, 2	Mj_1_GCCAAT_L005_R1_001_(paired)_trimmed_(paired)_contig_768, TR74461|c0_g1_i1, TR69160|c0_g1_i2, TR57222|c0_g1_i2, TR63515|c0_g2_i2, TR56963|c0_g2_i1, Mj_1_GCCAAT_L005_R1_001_(paired)_trimmed_(paired)_contig_23290, TR65893|c0_g1_i1, TR73527|c0_g1_i7, TR73527|c0_g1_i6, TR56313|c0_g1_i1, TR68557|c0_g1_i2, TR68557|c0_g2_i2, Mj_1_GCCAAT_L005_R1_001_(paired)_trimmed_(paired)_contig_9403, TR56963|c1_g…	5	12	41.6667
Flavonoid biosynthesis	map00941	ec:1.14.14.96 - 3'-monooxygenase, ec:1.14.14.82 - 3'-monooxygenase, ec:1.14.20.6 - synthase, ec:5.5.1.6 - isomerase, ec:1.1.1.219 - 4-reductase, ec:2.3.1.170 - synthase, ec:1.14.14.81 - 3',5'-hydroxylase, ec:1.14.11.9 - 3-dioxygenase, ec:2.1.1.104 - O-methyltransferase	3, 4, 7, 2, 7, 2, 4, 1, 1	TR56301|c0_g1_i2, TR56301|c0_g1_i4, TR54391|c0_g1_i3, TR56301|c0_g1_i2, TR68133|c0_g2_i1, TR54391|c0_g1_i3, TR56301|c0_g1_i4, Mj_1_GCCAAT_L005_R1_001_(paired)_trimmed_(paired)_contig_46808, Mj_1_GCCAAT_L005_R1_001_(paired)_trimmed_(paired)_contig_7160, TR61376|c0_g2_i1, TR55710|c0_g1_i4, TR55710|c0_g1_i2, TR58415|c0_g1_i1, Mj_1_GCCAAT_L005_R1_001_(paired)_trimmed_(paired)_contig_982, TR64329|c0_g…	9	22	40.9091
Citrate cycle (TCA cycle)	map00020	ec:4.1.1.32 - carboxykinase (GTP), ec:2.3.1.12 - acetyltransferase, ec:1.8.1.4 - dehydrogenase, ec:1.1.1.37 - dehydrogenase, ec:6.2.1.5 - ligase (ADP-forming), ec:1.3.5.1 - dehydrogenase, ec:1.2.4.1 - dehydrogenase (acetyl-transferring), ec:2.3.3.8 - citrate synthase, ec:4.2.1.2 - hydratase, ec:6.2.1.4 - ligase (GDP-forming)	4, 2, 1, 3, 2, 1, 2, 2, 3, 2	TR68854|c3_g5_i2, TR68854|c3_g5_i3, TR68854|c3_g5_i5, TR61942|c1_g1_i1, TR59869|c0_g1_i1, TR66245|c0_g1_i1, TR75071|c0_g1_i1, Mj_1_GCCAAT_L005_R1_001_(paired)_trimmed_(paired)_contig_1051, TR67315|c5_g3_i1, TR65834|c0_g1_i1, TR56398|c0_g1_i1, TR56398|c0_g1_i2, TR67732|c2_g1_i5, TR56168|c1_g1_i2, TR56168|c1_g1_i3, TR56398|c0_g1_i1, TR56398|c0_g1_i2, TR73647|c0_g2_i5, TR73210|c0_g1_i2, TR73210|c0_g…	10	25	40
Phenylpropanoid biosynthesis	map00940	ec:2.4.1.128 - glucosyltransferase, ec:1.14.14.96 - 3'-monooxygenase, ec:1.1.1.195 - dehydrogenase, ec:1.2.1.44 - reductase, ec:1.11.1.7 - lactoperoxidase, ec:4.3.1.25 - ammonia-lyase, ec:2.1.1.146 - O-methyltransferase, ec:3.2.1.21 - gentiobiase, ec:4.3.1.24 - ammonia-lyase, ec:2.1.1.68 - O-methyltransferase, ec:6.2.1.12 - ligase, ec:2.1.1.104 - O-methyltransferase	1, 3, 1, 3, 23, 1, 1, 9, 1, 4, 1, 1	Mj_1_GCCAAT_L005_R1_001_(paired)_trimmed_(paired)_contig_36930, TR56301|c0_g1_i2, TR56301|c0_g1_i4, TR54391|c0_g1_i3, TR68557|c0_g1_i2, TR66359|c0_g1_i1, TR66581|c0_g1_i2, TR66359|c0_g1_i2, TR77805|c0_g2_i3, Mj_1_GCCAAT_L005_R1_001_(paired)_trimmed_(paired)_contig_16365, TR75024|c1_g2_i1, TR75024|c1_g3_i1, TR77785|c0_g1_i1, TR75024|c1_g3_i3, TR75024|c1_g3_i4, TR77805|c0_g2_i1, TR75344|c2_g3_i1, M…	12	30	40
Oxidative phosphorylation	map00190	ec:3.6.1.1 - diphosphatase, ec:7.1.2.2 - two-sector ATPase, ec:1.3.5.1 - dehydrogenase, ec:7.1.1.2 - reductase (H+-translocating)	5, 10, 1, 11	Mj_1_GCCAAT_L005_R1_001_(paired)_trimmed_(paired)_contig_14762, C966756, TR67620|c0_g1_i1, TR56725|c0_g1_i1, TR56278|c0_g1_i1, TR50698|c0_g1_i1, TR68785|c0_g2_i1, TR51779|c0_g1_i2, TR50698|c0_g1_i2, TR51779|c0_g1_i1, TR60833|c0_g1_i3, C972548, Mj_1_GCCAAT_L005_R1_001_(paired)_trimmed_(paired)_contig_13159, Mj_1_GCCAAT_L005_R1_001_(paired)_trimmed_(paired)_contig_7433, TR52910|c0_g1_i2, TR67732|c2…	4	11	36.3636
Phenylalanine, tyrosine and tryptophan biosynthesis	map00400	ec:1.3.1.13 - dehydrogenase (NADP+), ec:2.6.1.57 - transaminase, ec:1.1.1.282 - dehydrogenase, ec:4.1.3.27 - synthase, ec:2.6.1.5 - transaminase, ec:5.4.99.5 - mutase, ec:1.3.1.12 - dehydrogenase, ec:2.6.1.1 - transaminase, ec:1.1.1.25 - dehydrogenase, ec:1.3.1.78 - dehydrogenase (NADP+), ec:4.2.1.10 - dehydratase, ec:2.5.1.54 - synthase, ec:2.7.1.71 - kinase, ec:2.6.1.9 - transaminase	3, 3, 3, 2, 2, 1, 3, 3, 3, 3, 3, 2, 8, 2	TR78473|c2_g1_i3, TR78473|c2_g1_i2, TR78473|c2_g1_i1, TR51632|c0_g1_i1, TR70672|c0_g2_i2, TR69989|c1_g1_i3, TR60786|c0_g1_i1, TR57223|c0_g1_i1, TR76194|c0_g1_i6, TR47295|c0_g1_i2, TR47295|c0_g1_i1, TR70672|c0_g2_i2, TR69989|c1_g1_i3, TR56560|c0_g1_i4, TR78473|c2_g1_i3, TR78473|c2_g1_i2, TR78473|c2_g1_i1, TR51632|c0_g1_i1, TR70672|c0_g2_i2, TR69989|c1_g1_i3, TR60786|c0_g1_i1, TR57223|c0_g1_i1, TR7…	14	39	35.8974
Fatty acid biosynthesis	map00061	ec:6.2.1.3 - ligase, ec:2.3.1.85 - synthase system, ec:6.4.1.2 - carboxylase, ec:3.1.2.14 - hydrolase, ec:2.3.1.41 - synthase I, ec:1.1.1.100 - reductase	1, 10, 7, 3, 4, 3	TR64463|c0_g1_i1, TR64043|c0_g1_i2, TR68649|c1_g2_i2, TR47892|c0_g1_i2, Mj_1_GCCAAT_L005_R1_001_(paired)_trimmed_(paired)_contig_17661, C960134, TR56336|c0_g1_i1, TR56963|c0_g2_i1, TR56963|c1_g2_i2, TR63337|c0_g1_i2, TR63337|c0_g1_i1, Mj_1_GCCAAT_L005_R1_001_(paired)_trimmed_(paired)_contig_3535, TR71730|c0_g1_i1, TR78089|c0_g2_i3, TR78089|c0_g2_i1, TR71730|c0_g1_i2, TR77917|c0_g1_i11, TR78089|c0…	6	17	35.2941
Betalain biosynthesis	map00965	ec:4.1.1.28 - decarboxylase	2	TR70616|c1_g1_i1, TR69452|c1_g1_i2	1	3	33.3333
Galactose metabolism	map00052	ec:5.1.3.2 - 4-epimerase, ec:3.2.1.26 - invertase, ec:2.7.7.64 - uridylyltransferase, ec:2.4.1.82 - galactosyltransferase, ec:3.2.1.20 - maltase, ec:2.7.7.9 - uridylyltransferase, ec:1.1.1.21 - reductase, ec:2.7.1.2 - glucokinase (phosphorylating), ec:1.1.3.9 - oxidase, ec:3.2.1.22 - melibiase, ec:5.4.2.2 - (alpha-D-glucose-1,6-bisphosphate-dependent), ec:2.7.1.11 - phosphohexokinase, ec:2.4.1.67…	2, 8, 1, 4, 8, 3, 8, 1, 1, 5, 10, 1, 12, 1, 2, 6	Mj_1_GCCAAT_L005_R1_001_(paired)_trimmed_(paired)_contig_13855, TR67358|c0_g1_i1, TR65773|c0_g1_i2, Mj_1_GCCAAT_L005_R1_001_(paired)_trimmed_(paired)_contig_3520, C972144, TR64495|c0_g1_i1, TR70088|c0_g1_i1, TR57038|c0_g1_i2, scaffold14387, Mj_1_GCCAAT_L005_R1_001_(paired)_trimmed_(paired)_contig_10234, TR58806|c0_g1_i2, TR77559|c0_g2_i1, TR71761|c0_g1_i2, TR77559|c0_g2_i2, TR77559|c0_g2_i4, TR65…	16	48	33.3333
Lipoic acid metabolism	map00785	ec:2.8.1.8 - synthase	5	TR59414|c0_g1_i2, TR61044|c0_g1_i1, TR26381|c0_g1_i1, Mj_1_GCCAAT_L005_R1_001_(paired)_trimmed_(paired)_contig_9923, TR70301|c0_g1_i1	1	3	33.3333
Other glycan degradation	map00511	ec:3.2.1.51 - alpha-fucosidase, ec:3.2.1.52 - hexosaminidase, ec:3.2.1.24 - alpha-D-mannosidase	3, 3, 2	TR71699|c0_g1_i3, TR71699|c0_g1_i2, TR56382|c0_g1_i1, TR65791|c0_g1_i1, TR72158|c1_g1_i1, Mj_1_GCCAAT_L005_R1_001_(paired)_trimmed_(paired)_contig_8573, TR60818|c1_g1_i1, Mj_1_GCCAAT_L005_R1_001_(paired)_trimmed_(paired)_contig_274	3	9	33.3333
Arginine biosynthesis	map00220	ec:2.3.1.1 - N-acetyltransferase, ec:2.6.1.2 - transaminase, ec:1.2.1.38 - reductase, ec:6.3.1.2 - synthetase, ec:2.7.2.8 - kinase, ec:6.3.4.16 - synthase (ammonia), ec:2.6.1.1 - transaminase, ec:2.6.1.11 - transaminase, ec:3.5.1.2 - glutaminase I	2, 2, 1, 3, 2, 1, 3, 1, 3	TR74941|c2_g1_i2, TR74941|c0_g1_i1, TR49718|c0_g1_i1, TR49718|c0_g1_i2, TR79067|c3_g3_i10, TR65810|c0_g1_i2, scaffold14467, TR49701|c0_g1_i1, TR74941|c2_g1_i2, TR74941|c0_g1_i1, scaffold13867, TR51632|c0_g1_i1, TR70672|c0_g2_i2, TR69989|c1_g1_i3, Mj_1_GCCAAT_L005_R1_001_(paired)_trimmed_(paired)_contig_11444, TR59547|c1_g1_i4, TR59547|c1_g1_i3, TR59547|c1_g1_i1	9	28	32.1429
Glutathione metabolism	map00480	ec:1.11.1.11 - peroxidase, ec:3.4.19.13 - gamma-glutamate hydrolase, ec:1.17.4.1 - reductase, ec:6.3.2.3 - synthase, ec:1.8.5.1 - dehydrogenase (ascorbate), ec:1.11.1.12 - glutathione peroxidase, ec:1.1.1.44 - dehydrogenase (NADP+-dependent, decarboxylating), ec:1.11.1.9 - peroxidase, ec:2.5.1.18 - transferase, ec:2.3.2.2 - glutamyl transpeptidase, ec:1.1.1.49 - dehydrogenase (NADP+), ec:1.8.1.7 …	7, 2, 2, 1, 3, 1, 7, 1, 11, 2, 6, 2	TR64682|c0_g1_i1, Mj_1_GCCAAT_L005_R1_001_(paired)_trimmed_(paired)_contig_9736, TR60767|c0_g1_i2, TR71460|c0_g1_i7, TR75198|c0_g2_i5, Mj_1_GCCAAT_L005_R1_001_(paired)_trimmed_(paired)_contig_5750, TR71460|c0_g1_i3, TR49718|c0_g1_i1, TR49718|c0_g1_i2, TR63570|c0_g1_i1, TR66318|c0_g1_i1, TR72492|c0_g1_i2, TR56200|c0_g1_i1, TR56200|c0_g1_i2, TR60671|c0_g1_i1, Mj_1_GCCAAT_L005_R1_001_(paired)_trimme…	12	38	31.5789
Glycerolipid metabolism	map00561	ec:2.3.1.20 - O-acyltransferase, ec:1.2.1.3 - dehydrogenase (NAD+), ec:2.7.1.31 - 3-kinase, ec:2.7.7.9 - uridylyltransferase, ec:1.1.1.21 - reductase, ec:1.1.1.2 - dehydrogenase (NADP+), ec:3.1.1.3 - lipase, ec:3.2.1.22 - melibiase, ec:2.7.1.107 - kinase (ATP), ec:3.1.1.23 - lipase, ec:3.1.1.26 - galactolipid lipase, ec:3.1.3.4 - phosphatase	1, 10, 1, 3, 8, 8, 4, 5, 2, 3, 2, 1	TR77367|c2_g3_i4, TR56409|c0_g1_i2, TR68787|c0_g2_i1, TR68787|c0_g2_i2, scaffold11904, TR67594|c2_g1_i3, scaffold11903, TR67365|c0_g1_i1, TR67482|c3_g3_i2, TR67482|c3_g3_i4, Mj_1_GCCAAT_L005_R1_001_(paired)_trimmed_(paired)_contig_18843, TR68625|c0_g1_i1, TR75538|c1_g1_i1, TR58806|c0_g1_i2, TR75538|c1_g1_i3, TR57600|c0_g1_i2, TR56901|c0_g1_i1, TR52900|c0_g1_i2, TR56901|c0_g1_i4, TR56901|c0_g1_i3,…	12	39	30.7692
Zeatin biosynthesis	map00908	ec:2.4.1.215 - O-beta-D-glucosyltransferase, ec:2.5.1.75 - dimethylallyltransferase, ec:2.4.1.203 - O-beta-D-glucosyltransferase	3, 3, 3	Mj_1_GCCAAT_L005_R1_001_(paired)_trimmed_(paired)_contig_18129, TR70221|c1_g2_i6, TR78240|c0_g5_i2, TR68043|c0_g1_i5, TR68043|c0_g1_i4, TR68043|c1_g1_i1, Mj_1_GCCAAT_L005_R1_001_(paired)_trimmed_(paired)_contig_18129, TR70221|c1_g2_i6, TR78240|c0_g5_i2	3	10	30
Starch and sucrose metabolism	map00500	ec:3.2.1.26 - invertase, ec:5.4.2.6 - beta-pgm (gene name), ec:3.2.1.20 - maltase, ec:2.7.7.9 - uridylyltransferase, ec:3.2.1.1 - glycogenase, ec:3.2.1.28 - trehalase, ec:2.7.1.2 - glucokinase (phosphorylating), ec:2.4.1.21 - synthase (glycosyl-transferring), ec:5.4.2.2 - (alpha-D-glucose-1,6-bisphosphate-dependent), ec:2.4.1.18 - branching enzyme, ec:2.4.1.12 - synthase (UDP-forming), ec:2.7.1.4…	8, 3, 8, 3, 6, 1, 1, 4, 10, 3, 9, 3, 2, 10, 7, 6, 5, 9, 9, 6, 4, 8	TR65773|c0_g1_i2, Mj_1_GCCAAT_L005_R1_001_(paired)_trimmed_(paired)_contig_3520, C972144, TR64495|c0_g1_i1, TR70088|c0_g1_i1, TR57038|c0_g1_i2, scaffold14387, Mj_1_GCCAAT_L005_R1_001_(paired)_trimmed_(paired)_contig_10234, TR71358|c0_g1_i5, TR71358|c0_g1_i4, Mj_1_GCCAAT_L005_R1_001_(paired)_trimmed_(paired)_contig_394, TR65773|c0_g1_i2, Mj_1_GCCAAT_L005_R1_001_(paired)_trimmed_(paired)_contig_352…	22	77	28.5714
Pyruvate metabolism	map00620	ec:1.1.1.82 - dehydrogenase (NADP+), ec:4.1.1.32 - carboxykinase (GTP), ec:1.2.1.3 - dehydrogenase (NAD+), ec:1.1.1.79 - reductase (NADP+), ec:4.2.1.130 - dehydratase, ec:2.3.1.12 - acetyltransferase, ec:6.2.1.1 - ligase, ec:1.8.1.4 - dehydrogenase, ec:4.1.1.112 - decarboxylase, ec:1.1.1.40 - dehydrogenase (oxaloacetate-decarboxylating) (NADP+), ec:1.1.1.37 - dehydrogenase, ec:4.1.1.31 - carboxyl…	1, 4, 10, 3, 1, 2, 4, 1, 3, 3, 3, 4, 2, 7, 1, 3, 3, 3, 3	TR65834|c0_g1_i1, TR68854|c3_g5_i2, TR68854|c3_g5_i3, TR68854|c3_g5_i5, TR61942|c1_g1_i1, TR56409|c0_g1_i2, TR68787|c0_g2_i1, TR68787|c0_g2_i2, scaffold11904, TR67594|c2_g1_i3, scaffold11903, TR67365|c0_g1_i1, TR67482|c3_g3_i2, TR67482|c3_g3_i4, Mj_1_GCCAAT_L005_R1_001_(paired)_trimmed_(paired)_contig_18843, TR65456|c0_g1_i2, TR65650|c1_g1_i2, TR65650|c1_g1_i1, Mj_1_GCCAAT_L005_R1_001_(paired)_tr…	19	67	28.3582
Fatty acid degradation	map00071	ec:1.2.1.3 - dehydrogenase (NAD+), ec:1.14.15.3 - 1-monooxygenase, ec:6.2.1.3 - ligase, ec:2.3.1.16 - C-acyltransferase, ec:1.14.14.1 - monooxygenase, ec:2.3.1.9 - C-acetyltransferase, ec:1.1.1.1 - dehydrogenase, ec:4.2.1.17 - hydratase	10, 4, 1, 1, 14, 1, 13, 2	TR56409|c0_g1_i2, TR68787|c0_g2_i1, TR68787|c0_g2_i2, scaffold11904, TR67594|c2_g1_i3, scaffold11903, TR67365|c0_g1_i1, TR67482|c3_g3_i2, TR67482|c3_g3_i4, Mj_1_GCCAAT_L005_R1_001_(paired)_trimmed_(paired)_contig_18843, TR67306|c0_g1_i4, Mj_1_GCCAAT_L005_R1_001_(paired)_trimmed_(paired)_contig_2610, TR67306|c0_g1_i3, TR67306|c0_g1_i2, TR64463|c0_g1_i1, Mj_1_GCCAAT_L005_R1_001_(paired)_trimmed_(pa…	8	29	27.5862
Pentose phosphate pathway	map00030	ec:5.1.3.1 - 3-epimerase, ec:5.4.2.2 - (alpha-D-glucose-1,6-bisphosphate-dependent), ec:2.7.1.11 - phosphohexokinase, ec:4.1.2.14 - aldolase, ec:5.3.1.9 - isomerase, ec:1.1.1.44 - dehydrogenase (NADP+-dependent, decarboxylating), ec:3.1.3.11 - hexose diphosphatase, ec:1.1.1.47 - 1-dehydrogenase [NAD(P)+], ec:5.3.1.6 - isomerase, ec:2.7.1.15 - deoxyribokinase, ec:3.1.1.31 - phosphogluconolactonase…	3, 10, 1, 2, 2, 7, 9, 3, 2, 3, 2, 1, 2, 8, 6	scaffold11293, TR42759|c0_g1_i2, scaffold11292, TR69750|c0_g1_i2, TR71113|c0_g1_i1, TR71113|c0_g1_i3, TR70224|c0_g1_i1, Mj_1_GCCAAT_L005_R1_001_(paired)_trimmed_(paired)_contig_2368, Mj_1_GCCAAT_L005_R1_001_(paired)_trimmed_(paired)_contig_1543, TR71117|c2_g2_i2, TR71117|c2_g2_i1, TR73361|c0_g1_i1, TR71113|c0_g1_i6, Mj_1_GCCAAT_L005_R1_001_(paired)_trimmed_(paired)_contig_3546, TR65788|c0_g1_i1, …	15	55	27.2727
Inositol phosphate metabolism	map00562	ec:2.7.1.67 - 4-kinase, ec:3.1.3.56 - 5-phosphatase, ec:3.1.3.67 - 3-phosphatase, ec:3.1.4.3 - C, ec:5.3.1.1 - isomerase, ec:3.1.3.64 - inositol-1,3-bisphosphate 3-phosphatase, ec:3.1.4.11 - phospholipase C, ec:2.7.1.159 - 5/6-kinase, ec:3.1.3.36 - 5-phosphatase, ec:2.7.1.68 - 5-kinase, ec:2.7.1.134 - 1-kinase, ec:3.1.3.57 - 1-phosphatase, ec:2.7.1.150 - 5-kinase	1, 1, 1, 2, 2, 1, 2, 1, 2, 2, 1, 3, 2	TR61027|c0_g1_i1, TR62292|c0_g1_i3, TR69325|c0_g1_i2, Mj_1_GCCAAT_L005_R1_001_(paired)_trimmed_(paired)_contig_624, TR61283|c0_g1_i1, TR63114|c0_g1_i1, Mj_1_GCCAAT_L005_R1_001_(paired)_trimmed_(paired)_contig_247, TR76404|c2_g1_i1, Mj_1_GCCAAT_L005_R1_001_(paired)_trimmed_(paired)_contig_624, TR61283|c0_g1_i1, Mj_1_GCCAAT_L005_R1_001_(paired)_trimmed_(paired)_contig_1858, TR57660|c0_g1_i1, scaffo…	13	48	27.0833
Glyoxylate and dicarboxylate metabolism	map00630	ec:1.1.1.79 - reductase (NADP+), ec:2.7.1.31 - 3-kinase, ec:1.2.3.4 - oxidase, ec:1.4.7.1 - synthase (ferredoxin), ec:6.2.1.1 - ligase, ec:1.1.1.26 - reductase, ec:1.1.1.60 - reductase, ec:3.5.1.10 - deformylase, ec:3.1.3.18 - phosphatase, ec:1.1.1.37 - dehydrogenase, ec:2.1.2.1 - hydroxymethyltransferase, ec:6.3.1.2 - synthetase, ec:4.1.1.39 - carboxylase, ec:1.1.1.36 - reductase, ec:2.3.1.9 - C…	3, 1, 4, 4, 4, 1, 5, 3, 1, 3, 2, 3, 3, 1, 1, 2, 1, 1, 3	TR65456|c0_g1_i2, TR65650|c1_g1_i2, TR65650|c1_g1_i1, TR68625|c0_g1_i1, TR46979|c0_g1_i1, Mj_1_GCCAAT_L005_R1_001_(paired)_trimmed_(paired)_contig_2728, TR47677|c0_g1_i1, scaffold14259, Mj_1_GCCAAT_L005_R1_001_(paired)_trimmed_(paired)_contig_1834, Mj_1_GCCAAT_L005_R1_001_(paired)_trimmed_(paired)_contig_1506, Mj_1_GCCAAT_L005_R1_001_(paired)_trimmed_(paired)_contig_5552, TR79537|c2_g1_i1, C97269…	19	73	26.0274
Caffeine metabolism	map00232	ec:1.7.3.3 - urate hydroxylase, ec:2.3.1.5 - N-acetyltransferase, ec:1.14.14.1 - monooxygenase	3, 5, 14	TR62645|c0_g4_i3, Mj_1_GCCAAT_L005_R1_001_(paired)_trimmed_(paired)_contig_25836, TR62645|c0_g4_i5, TR55595|c0_g1_i1, TR55595|c0_g1_i2, TR57613|c0_g1_i1, TR62510|c3_g1_i4, Mj_1_GCCAAT_L005_R1_001_(paired)_trimmed_(paired)_contig_3888, TR65699|c5_g3_i5, TR77997|c0_g1_i6, Mj_1_GCCAAT_L005_R1_001_(paired)_trimmed_(paired)_contig_2438, TR67306|c0_g1_i4, TR78194|c0_g1_i2, TR70581|c0_g1_i1, TR72750|c3_…	3	12	25
Thiamine metabolism	map00730	ec:3.6.1.15 - phosphatase, ec:2.5.1.3 - phosphate synthase, ec:3.1.3.2 - phosphatase, ec:2.8.1.7 - desulfurase, ec:2.7.4.3 - kinase, ec:2.8.1.4 - uracil 4-sulfurtransferase	80, 6, 12, 1, 4, 1	Mj_1_GCCAAT_L005_R1_001_(paired)_trimmed_(paired)_contig_15257, Mj_1_GCCAAT_L005_R1_001_(paired)_trimmed_(paired)_contig_15455, C974762, TR56153|c0_g1_i1, TR62580|c0_g2_i2, Mj_1_GCCAAT_L005_R1_001_(paired)_trimmed_(paired)_contig_36116, TR62580|c0_g2_i5, Mj_1_GCCAAT_L005_R1_001_(paired)_trimmed_(paired)_contig_12625, TR62843|c1_g1_i2, TR65437|c0_g1_i7, TR59058|c0_g1_i1, TR63650|c0_g2_i5, Mj_1_GCC…	6	24	25
Glycerophospholipid metabolism	map00564	ec:3.1.4.4 - D, ec:1.1.1.8 - dehydrogenase (NAD+), ec:2.7.8.1 - EPT, ec:2.7.7.41 - cytidylyltransferase, ec:2.7.1.107 - kinase (ATP), ec:3.1.4.3 - C, ec:3.1.1.32 - A1, ec:2.7.1.32 - kinase, ec:3.1.3.75 - phosphatase, ec:1.1.1.94 - dehydrogenase [NAD(P)+], ec:3.1.4.46 - phosphodiesterase, ec:2.7.1.82 - kinase, ec:2.3.1.43 - O-acyltransferase, ec:3.1.3.4 - phosphatase, ec:2.7.8.2 - cholinephosphotr…	2, 2, 1, 7, 2, 2, 1, 1, 3, 2, 1, 1, 2, 1, 1	Mj_1_GCCAAT_L005_R1_001_(paired)_trimmed_(paired)_contig_760, TR13565|c0_g1_i1, TR58003|c0_g1_i1, TR58003|c0_g1_i4, TR71229|c1_g2_i1, TR61660|c0_g1_i1, TR61660|c0_g1_i2, TR57518|c0_g1_i2, TR57518|c0_g1_i3, TR57518|c0_g1_i4, TR69758|c1_g1_i3, TR69758|c1_g1_i14, Mj_1_GCCAAT_L005_R1_001_(paired)_trimmed_(paired)_contig_21766, TR71360|c1_g1_i1, Mj_1_GCCAAT_L005_R1_001_(paired)_trimmed_(paired)_contig…	15	62	24.1935
Alanine, aspartate and glutamate metabolism	map00250	ec:2.6.1.2 - transaminase, ec:4.1.1.15 - decarboxylase, ec:2.6.1.96 - transaminase, ec:1.2.1.88 - gamma-semialdehyde dehydrogenase, ec:6.3.1.2 - synthetase, ec:6.3.4.16 - synthase (ammonia), ec:6.3.5.5 - synthase (glutamine-hydrolysing), ec:2.4.2.14 - phosphoribosyldiphosphate 5-amidotransferase, ec:2.6.1.1 - transaminase, ec:2.6.1.12 - transaminase, ec:3.5.1.2 - glutaminase I, ec:2.6.1.44 - tran…	2, 1, 1, 1, 3, 1, 1, 1, 3, 2, 3, 2	TR49718|c0_g1_i1, TR49718|c0_g1_i2, TR65018|c0_g1_i2, Mj_1_GCCAAT_L005_R1_001_(paired)_trimmed_(paired)_contig_11444, TR56409|c0_g1_i2, TR65810|c0_g1_i2, scaffold14467, TR49701|c0_g1_i1, scaffold13867, scaffold13867, TR64446|c0_g1_i1, TR51632|c0_g1_i1, TR70672|c0_g2_i2, TR69989|c1_g1_i3, TR49718|c0_g1_i1, TR49718|c0_g1_i2, TR59547|c1_g1_i4, TR59547|c1_g1_i3, TR59547|c1_g1_i1, TR49718|c0_g1_i1, TR…	12	50	24
Terpenoid backbone biosynthesis	map00900	ec:2.5.1.84 - diphosphate synthase [geranyl-diphosphate specific], ec:2.5.1.31 - synthase [(2E,6E)-farnesyl-diphosphate specific], ec:1.1.1.34 - reductase (NADPH), ec:4.1.1.33 - decarboxylase, ec:2.5.1.30 - diphosphate synthase, ec:2.5.1.10 - diphosphate synthase, ec:2.5.1.85 - diphosphate synthase [geranylgeranyl-diphosphate specific], ec:2.3.1.9 - C-acetyltransferase, ec:2.7.7.60 - 4-phosphate …	3, 4, 4, 3, 3, 3, 3, 1, 1, 5, 6, 4	Mj_1_GCCAAT_L005_R1_001_(paired)_trimmed_(paired)_contig_2392, TR72271|c0_g1_i1, scaffold1163, TR60683|c0_g1_i2, TR60683|c0_g1_i3, TR60887|c0_g1_i2, TR60683|c0_g1_i4, TR65848|c0_g1_i2, TR65848|c0_g1_i1, TR64461|c0_g1_i2, scaffold13974, TR63768|c1_g1_i5, Mj_1_GCCAAT_L005_R1_001_(paired)_trimmed_(paired)_contig_19051, TR58625|c1_g2_i1, Mj_1_GCCAAT_L005_R1_001_(paired)_trimmed_(paired)_contig_2392, …	12	50	24
Ascorbate and aldarate metabolism	map00053	ec:1.11.1.11 - peroxidase, ec:1.2.1.3 - dehydrogenase (NAD+), ec:2.7.7.64 - uridylyltransferase, ec:1.6.5.4 - reductase (NADH), ec:1.1.1.2 - dehydrogenase (NADP+), ec:1.8.5.1 - dehydrogenase (ascorbate), ec:2.4.1.17 - 1-naphthol glucuronyltransferase, ec:1.10.3.3 - oxidase, ec:2.7.7.44 - uridylyltransferase, ec:1.1.3.8 - oxidase, ec:2.7.1.43 - glucuronokinase (phosphorylating)	7, 10, 1, 2, 8, 3, 1, 12, 2, 1, 1	TR64682|c0_g1_i1, Mj_1_GCCAAT_L005_R1_001_(paired)_trimmed_(paired)_contig_9736, TR60767|c0_g1_i2, TR71460|c0_g1_i7, TR75198|c0_g2_i5, Mj_1_GCCAAT_L005_R1_001_(paired)_trimmed_(paired)_contig_5750, TR71460|c0_g1_i3, TR56409|c0_g1_i2, TR68787|c0_g2_i1, TR68787|c0_g2_i2, scaffold11904, TR67594|c2_g1_i3, scaffold11903, TR67365|c0_g1_i1, TR67482|c3_g3_i2, TR67482|c3_g3_i4, Mj_1_GCCAAT_L005_R1_001_(pa…	11	46	23.913
Fatty acid elongation	map00062	ec:2.3.1.16 - C-acyltransferase, ec:4.2.1.17 - hydratase, ec:3.1.2.22 - hydrolase	1, 2, 1	Mj_1_GCCAAT_L005_R1_001_(paired)_trimmed_(paired)_contig_768, TR68655|c1_g1_i1, TR68778|c0_g1_i1, TR74417|c0_g3_i2	3	13	23.0769
Selenocompound metabolism	map00450	ec:2.7.7.4 - adenylyltransferase, ec:4.4.1.16 - lyase, ec:6.1.1.10 - ligase, ec:1.8.1.9 - reductase	4, 1, 7, 3	TR47295|c0_g1_i2, TR69679|c0_g1_i1, TR47295|c0_g1_i1, TR69679|c0_g1_i2, TR54417|c0_g1_i1, TR71529|c0_g1_i1, TR70912|c1_g1_i3, TR71529|c0_g1_i2, TR70912|c1_g1_i2, TR71529|c0_g1_i3, TR71529|c0_g1_i5, TR70912|c1_g1_i4, Mj_1_GCCAAT_L005_R1_001_(paired)_trimmed_(paired)_contig_390, TR78685|c0_g2_i3, TR78809|c0_g1_i2	4	18	22.2222
Tropane, piperidine and pyridine alkaloid biosynthesis	map00960	ec:1.1.1.237 - reductase, ec:2.6.1.57 - transaminase, ec:2.6.1.5 - transaminase, ec:1.1.1.206 - reductase I, ec:2.6.1.1 - transaminase, ec:2.6.1.9 - transaminase	1, 3, 2, 1, 3, 2	scaffold10753, TR51632|c0_g1_i1, TR70672|c0_g2_i2, TR69989|c1_g1_i3, TR70672|c0_g2_i2, TR69989|c1_g1_i3, C954748, TR51632|c0_g1_i1, TR70672|c0_g2_i2, TR69989|c1_g1_i3, TR70672|c0_g2_i2, TR69989|c1_g1_i3	6	27	22.2222
Ether lipid metabolism	map00565	ec:3.1.4.4 - D, ec:2.7.8.1 - EPT, ec:3.1.4.3 - C, ec:3.1.3.4 - phosphatase, ec:2.7.8.2 - cholinephosphotransferase	2, 1, 2, 1, 1	Mj_1_GCCAAT_L005_R1_001_(paired)_trimmed_(paired)_contig_760, TR13565|c0_g1_i1, TR71229|c1_g2_i1, Mj_1_GCCAAT_L005_R1_001_(paired)_trimmed_(paired)_contig_624, TR61283|c0_g1_i1, TR71921|c1_g2_i2, TR71229|c1_g2_i1	5	23	21.7391
Taurine and hypotaurine metabolism	map00430	ec:1.13.11.20 - dioxygenase, ec:4.1.1.15 - decarboxylase, ec:1.13.11.19 - dioxygenase, ec:2.3.2.2 - glutamyl transpeptidase	1, 1, 3, 2	TR63535|c0_g2_i3, TR65018|c0_g1_i2, TR63535|c0_g2_i3, TR68014|c0_g2_i6, TR68014|c0_g2_i9, TR49718|c0_g1_i1, TR49718|c0_g1_i2	4	19	21.0526
Porphyrin and chlorophyll metabolism	map00860	ec:4.99.1.1 - ferrochelatase, ec:3.1.1.14 - CLH, ec:1.2.1.70 - reductase, ec:1.14.14.18 - oxygenase (biliverdin-producing), ec:1.3.3.4 - oxidase, ec:1.3.3.3 - oxidase, ec:2.1.1.11 - protoporphyrin IX methyltransferase, ec:2.5.1.61 - synthase, ec:4.1.1.37 - decarboxylase, ec:6.6.1.2 - hydrogenobyrinic acid a,c-diamide cobaltochelatase, ec:2.4.1.17 - 1-naphthol glucuronyltransferase, ec:1.3.1.75 - …	2, 1, 2, 1, 2, 2, 2, 1, 4, 3, 1, 2, 4, 8, 3, 6, 2, 1, 8, 6, 1, 1	Mj_1_GCCAAT_L005_R1_001_(paired)_trimmed_(paired)_contig_2668, TR53770|c0_g1_i1, TR68021|c0_g1_i1, TR72450|c0_g1_i1, Mj_1_GCCAAT_L005_R1_001_(paired)_trimmed_(paired)_contig_450, TR61652|c0_g1_i1, TR61047|c0_g1_i1, Mj_1_GCCAAT_L005_R1_001_(paired)_trimmed_(paired)_contig_1006, TR54280|c1_g1_i1, TR54280|c1_g1_i2, TR72085|c2_g4_i2, Mj_1_GCCAAT_L005_R1_001_(paired)_trimmed_(paired)_contig_1070, TR54…	22	105	20.9524
One carbon pool by folate	map00670	ec:3.5.1.10 - deformylase, ec:2.1.2.1 - hydroxymethyltransferase, ec:2.1.2.3 - formyltransferase, ec:2.1.2.10 - S-aminomethyldihydrolipoylprotein:(6S)-tetrahydrofolate aminomethyltransferase (ammonia-forming), ec:6.3.3.2 - cyclo-ligase	3, 2, 2, 2, 1	TR66809|c0_g3_i1, TR66809|c0_g3_i6, TR66809|c0_g3_i3, Mj_1_GCCAAT_L005_R1_001_(paired)_trimmed_(paired)_contig_91, TR67588|c0_g1_i1, TR72133|c1_g1_i4, Mj_1_GCCAAT_L005_R1_001_(paired)_trimmed_(paired)_contig_16459, TR51117|c0_g1_i1, TR57309|c0_g1_i1, TR69031|c0_g1_i1	5	24	20.8333
Amino sugar and nucleotide sugar metabolism	map00520	ec:5.1.3.2 - 4-epimerase, ec:1.1.1.271 - synthase, ec:2.7.7.64 - uridylyltransferase, ec:2.7.7.9 - uridylyltransferase, ec:1.3.1.98 - dehydrogenase, ec:2.7.1.2 - glucokinase (phosphorylating), ec:5.4.2.8 - mannose phosphomutase, ec:2.7.1.44 - galacturonokinase (phosphorylating) D-galacturonic acid kinase, ec:5.4.2.2 - (alpha-D-glucose-1,6-bisphosphate-dependent), ec:2.7.1.4 - fructokinase (phosph…	2, 4, 1, 3, 2, 1, 12, 1, 10, 3, 1, 2, 2, 3, 1, 2, 7, 6, 1, 1, 2, 3, 1, 12	Mj_1_GCCAAT_L005_R1_001_(paired)_trimmed_(paired)_contig_13855, TR67358|c0_g1_i1, TR46979|c0_g1_i1, Mj_1_GCCAAT_L005_R1_001_(paired)_trimmed_(paired)_contig_2728, TR47677|c0_g1_i1, scaffold14259, TR58806|c0_g1_i2, TR75538|c1_g1_i1, TR58806|c0_g1_i2, TR75538|c1_g1_i3, TR65650|c1_g1_i2, TR65650|c1_g1_i1, Mj_1_GCCAAT_L005_R1_001_(paired)_trimmed_(paired)_contig_24277, TR71113|c0_g1_i1, TR71113|c0_g2…	24	119	20.1681
Carbon fixation pathways in prokaryotes	map00720	ec:6.2.1.1 - ligase, ec:1.1.1.37 - dehydrogenase, ec:4.1.1.31 - carboxylase, ec:6.2.1.5 - ligase (ADP-forming), ec:1.3.5.1 - dehydrogenase, ec:6.4.1.2 - carboxylase, ec:2.3.3.8 - citrate synthase, ec:2.3.1.9 - C-acetyltransferase, ec:4.2.1.17 - hydratase, ec:4.2.1.2 - hydratase	4, 3, 4, 2, 1, 7, 2, 1, 2, 3	C972690, Mj_1_GCCAAT_L005_R1_001_(paired)_trimmed_(paired)_contig_15859, TR74616|c1_g1_i4, TR74616|c1_g1_i7, Mj_1_GCCAAT_L005_R1_001_(paired)_trimmed_(paired)_contig_1051, TR67315|c5_g3_i1, TR65834|c0_g1_i1, TR68854|c3_g5_i2, TR68854|c3_g5_i3, TR68854|c3_g5_i5, TR61942|c1_g1_i1, TR56398|c0_g1_i1, TR56398|c0_g1_i2, TR67732|c2_g1_i5, Mj_1_GCCAAT_L005_R1_001_(paired)_trimmed_(paired)_contig_3535, TR…	10	50	20
Geraniol degradation	map00281	ec:2.3.1.16 - C-acyltransferase, ec:4.2.1.17 - hydratase	1, 2	Mj_1_GCCAAT_L005_R1_001_(paired)_trimmed_(paired)_contig_768, TR68655|c1_g1_i1, TR68778|c0_g1_i1	2	10	20
Valine, leucine and isoleucine degradation	map00280	ec:1.2.1.3 - dehydrogenase (NAD+), ec:1.8.1.4 - dehydrogenase, ec:2.3.1.168 - (2-methylpropanoyl)transferase, ec:2.3.1.16 - C-acyltransferase, ec:2.3.1.9 - C-acetyltransferase, ec:2.6.1.42 - transaminase, ec:4.2.1.17 - hydratase	10, 1, 2, 1, 1, 1, 2	TR56409|c0_g1_i2, TR68787|c0_g2_i1, TR68787|c0_g2_i2, scaffold11904, TR67594|c2_g1_i3, scaffold11903, TR67365|c0_g1_i1, TR67482|c3_g3_i2, TR67482|c3_g3_i4, Mj_1_GCCAAT_L005_R1_001_(paired)_trimmed_(paired)_contig_18843, TR75071|c0_g1_i1, TR59869|c0_g1_i1, TR66245|c0_g1_i1, Mj_1_GCCAAT_L005_R1_001_(paired)_trimmed_(paired)_contig_768, Mj_1_GCCAAT_L005_R1_001_(paired)_trimmed_(paired)_contig_768, M…	7	36	19.4444
Glycine, serine and threonine metabolism	map00260	ec:1.2.1.8 - dehydrogenase, ec:1.4.4.2 - dehydrogenase (aminomethyl-transferring), ec:2.7.1.31 - 3-kinase, ec:4.1.2.5 - aldolase, ec:1.8.1.4 - dehydrogenase, ec:2.1.2.1 - hydroxymethyltransferase, ec:2.1.2.10 - S-aminomethyldihydrolipoylprotein:(6S)-tetrahydrofolate aminomethyltransferase (ammonia-forming), ec:1.1.1.1 - dehydrogenase, ec:2.6.1.4 - transaminase, ec:3.1.3.3 - phosphatase, ec:1.5.3.…	2, 3, 1, 2, 1, 2, 2, 13, 2, 1, 1, 2, 1	TR67482|c3_g3_i4, TR67482|c3_g3_i2, Mj_1_GCCAAT_L005_R1_001_(paired)_trimmed_(paired)_contig_3324, Mj_1_GCCAAT_L005_R1_001_(paired)_trimmed_(paired)_contig_1012, TR73844|c3_g2_i1, TR68625|c0_g1_i1, TR66148|c0_g1_i5, TR66711|c0_g1_i2, TR75071|c0_g1_i1, Mj_1_GCCAAT_L005_R1_001_(paired)_trimmed_(paired)_contig_91, TR67588|c0_g1_i1, TR51117|c0_g1_i1, TR57309|c0_g1_i1, TR57222|c0_g1_i2, TR63515|c0_g2_…	13	68	19.1176
Caprolactam degradation	map00930	ec:1.14.15.3 - 1-monooxygenase, ec:1.1.1.2 - dehydrogenase (NADP+), ec:1.2.1.4 - dehydrogenase (NADP+), ec:4.2.1.17 - hydratase	4, 8, 3, 2	TR67306|c0_g1_i4, Mj_1_GCCAAT_L005_R1_001_(paired)_trimmed_(paired)_contig_2610, TR67306|c0_g1_i3, TR67306|c0_g1_i2, TR57600|c0_g1_i2, TR56901|c0_g1_i1, TR52900|c0_g1_i2, TR56901|c0_g1_i4, TR56901|c0_g1_i3, TR57600|c0_g1_i1, TR57653|c0_g1_i1, TR57600|c0_g1_i4, TR68787|c0_g2_i1, TR67594|c2_g1_i3, TR68787|c0_g2_i2, TR68655|c1_g1_i1, TR68778|c0_g1_i1	4	21	19.0476
Nitrogen metabolism	map00910	ec:1.4.7.1 - synthase (ferredoxin), ec:4.2.1.1 - anhydrase, ec:1.7.1.1 - reductase (NADH), ec:6.3.1.2 - synthetase, ec:6.3.4.16 - synthase (ammonia), ec:1.7.1.3 - reductase (NADPH), ec:1.7.1.2 - reductase [NAD(P)H]	4, 10, 3, 3, 1, 2, 2	Mj_1_GCCAAT_L005_R1_001_(paired)_trimmed_(paired)_contig_1834, Mj_1_GCCAAT_L005_R1_001_(paired)_trimmed_(paired)_contig_1506, Mj_1_GCCAAT_L005_R1_001_(paired)_trimmed_(paired)_contig_5552, TR79537|c2_g1_i1, Mj_1_GCCAAT_L005_R1_001_(paired)_trimmed_(paired)_contig_80, TR43952|c0_g1_i2, Mj_1_GCCAAT_L005_R1_001_(paired)_trimmed_(paired)_contig_809, TR43952|c0_g1_i1, Mj_1_GCCAAT_L005_R1_001_(paired)_…	7	37	18.9189
Chloroalkane and chloroalkene degradation	map00625	ec:1.2.1.3 - dehydrogenase (NAD+), ec:3.8.1.5 - dehalogenase, ec:1.1.1.1 - dehydrogenase	10, 6, 13	TR56409|c0_g1_i2, TR68787|c0_g2_i1, TR68787|c0_g2_i2, scaffold11904, TR67594|c2_g1_i3, scaffold11903, TR67365|c0_g1_i1, TR67482|c3_g3_i2, TR67482|c3_g3_i4, Mj_1_GCCAAT_L005_R1_001_(paired)_trimmed_(paired)_contig_18843, TR74558|c0_g2_i6, TR74558|c0_g2_i7, TR69405|c0_g1_i2, TR74558|c0_g2_i4, TR69405|c0_g1_i3, TR74558|c0_g2_i5, TR57222|c0_g1_i2, TR63515|c0_g2_i2, TR56963|c0_g2_i1, Mj_1_GCCAAT_L005_…	3	16	18.75
Phenylalanine metabolism	map00360	ec:3.5.1.4 - acylamidase, ec:1.1.1.237 - reductase, ec:2.6.1.57 - transaminase, ec:1.2.1.5 - dehydrogenase [NAD(P)+], ec:2.6.1.5 - transaminase, ec:3.5.1.32 - hydrolase, ec:4.1.1.28 - decarboxylase, ec:4.3.1.25 - ammonia-lyase, ec:2.6.1.1 - transaminase, ec:2.6.1.9 - transaminase, ec:4.2.1.17 - hydratase, ec:4.3.1.24 - ammonia-lyase	4, 1, 3, 8, 2, 2, 2, 1, 3, 2, 2, 1	TR71136|c0_g1_i5, TR71136|c1_g1_i2, TR71136|c0_g1_i2, TR71136|c1_g1_i3, scaffold10753, TR51632|c0_g1_i1, TR70672|c0_g2_i2, TR69989|c1_g1_i3, TR56409|c0_g1_i2, TR68787|c0_g2_i1, TR68787|c0_g2_i2, TR67594|c2_g1_i3, TR67365|c0_g1_i1, TR67482|c3_g3_i2, TR67482|c3_g3_i4, Mj_1_GCCAAT_L005_R1_001_(paired)_trimmed_(paired)_contig_18843, TR70672|c0_g2_i2, TR69989|c1_g1_i3, TR47634|c0_g1_i1, Mj_1_GCCAAT_L0…	12	66	18.1818
Fructose and mannose metabolism	map00051	ec:1.1.1.271 - synthase, ec:3.1.3.46 - 2-phosphatase, ec:2.7.1.105 - phosphofructokinase 2, ec:1.1.1.21 - reductase, ec:5.4.2.8 - mannose phosphomutase, ec:5.3.1.1 - isomerase, ec:2.7.1.11 - phosphohexokinase, ec:2.7.1.4 - fructokinase (phosphorylating), ec:2.7.1.1 - hexokinase type IV glucokinase, ec:3.1.3.11 - hexose diphosphatase, ec:5.3.1.6 - isomerase, ec:4.1.2.13 - aldolase, ec:5.3.1.8 - is…	4, 10, 9, 8, 12, 2, 1, 3, 6, 9, 2, 8, 1	TR46979|c0_g1_i1, Mj_1_GCCAAT_L005_R1_001_(paired)_trimmed_(paired)_contig_2728, TR47677|c0_g1_i1, scaffold14259, TR78891|c0_g1_i9, TR78891|c0_g1_i8, TR78891|c0_g1_i7, TR78891|c0_g1_i6, TR78891|c0_g1_i5, TR78891|c0_g1_i3, TR78891|c0_g1_i2, Mj_1_GCCAAT_L005_R1_001_(paired)_trimmed_(paired)_contig_1040, TR65744|c0_g1_i6, TR65744|c0_g1_i7, TR78891|c0_g1_i9, TR78891|c0_g1_i8, TR78891|c0_g1_i7, TR7889…	13	75	17.3333
Cyanoamino acid metabolism	map00460	ec:2.1.2.1 - hydroxymethyltransferase, ec:1.14.14.37 - oxime monooxygenase, ec:3.2.1.21 - gentiobiase, ec:4.1.2.10 - lyase, ec:2.3.2.2 - glutamyl transpeptidase	2, 3, 9, 2, 2	Mj_1_GCCAAT_L005_R1_001_(paired)_trimmed_(paired)_contig_91, TR67588|c0_g1_i1, TR66936|c0_g1_i2, Mj_1_GCCAAT_L005_R1_001_(paired)_trimmed_(paired)_contig_13163, TR66936|c0_g1_i3, TR79240|c1_g3_i7, Mj_1_GCCAAT_L005_R1_001_(paired)_trimmed_(paired)_contig_1981, TR69325|c0_g1_i2, Mj_1_GCCAAT_L005_R1_001_(paired)_trimmed_(paired)_contig_6356, TR79240|c1_g3_i1, TR53076|c0_g1_i3, TR48616|c1_g1_i1, TR53…	5	29	17.2414
Ethylbenzene degradation	map00642	ec:2.3.1.16 - C-acyltransferase	1	Mj_1_GCCAAT_L005_R1_001_(paired)_trimmed_(paired)_contig_768	1	6	16.6667
Steroid hormone biosynthesis	map00140	ec:1.1.1.145 - dehydrogenase, ec:1.1.1.62 - 17-dehydrogenase, ec:2.4.1.17 - 1-naphthol glucuronyltransferase, ec:1.14.14.1 - monooxygenase, ec:1.1.1.149 - dehydrogenase, ec:1.1.1.146 - dehydrogenase	4, 1, 1, 14, 1, 1	TR66359|c0_g1_i1, TR66581|c0_g1_i2, TR68557|c0_g1_i2, TR66359|c0_g1_i2, Mj_1_GCCAAT_L005_R1_001_(paired)_trimmed_(paired)_contig_2980, TR41170|c0_g1_i1, TR65699|c5_g3_i5, TR77997|c0_g1_i6, Mj_1_GCCAAT_L005_R1_001_(paired)_trimmed_(paired)_contig_2438, TR67306|c0_g1_i4, TR78194|c0_g1_i2, TR70581|c0_g1_i1, TR72750|c3_g1_i2, Mj_1_GCCAAT_L005_R1_001_(paired)_trimmed_(paired)_contig_3652, Mj_1_GCCAAT_…	6	36	16.6667
Stilbenoid, diarylheptanoid and gingerol biosynthesis	map00945	ec:1.14.14.96 - 3'-monooxygenase, ec:2.1.1.104 - O-methyltransferase	3, 1	TR56301|c0_g1_i2, TR56301|c0_g1_i4, TR54391|c0_g1_i3, Mj_1_GCCAAT_L005_R1_001_(paired)_trimmed_(paired)_contig_8447	2	12	16.6667
Synthesis and degradation of ketone bodies	map00072	ec:2.3.1.9 - C-acetyltransferase	1	Mj_1_GCCAAT_L005_R1_001_(paired)_trimmed_(paired)_contig_768	1	6	16.6667
Pentose and glucuronate interconversions	map00040	ec:3.2.1.15 - pectin depolymerase (ambiguous), ec:5.1.3.1 - 3-epimerase, ec:2.7.7.64 - uridylyltransferase, ec:2.7.7.9 - uridylyltransferase, ec:1.1.1.21 - reductase, ec:3.2.1.67 - 1,4-alpha-galacturonidase, ec:1.1.1.2 - dehydrogenase (NADP+), ec:2.4.1.17 - 1-naphthol glucuronyltransferase, ec:2.7.7.44 - uridylyltransferase, ec:2.7.1.43 - glucuronokinase (phosphorylating), ec:3.1.1.11 - pectin de…	8, 3, 1, 3, 8, 1, 8, 1, 2, 1, 10	scaffold11158, TR56313|c0_g1_i1, TR70280|c0_g1_i6, Mj_1_GCCAAT_L005_R1_001_(paired)_trimmed_(paired)_contig_4832, Mj_1_GCCAAT_L005_R1_001_(paired)_trimmed_(paired)_contig_468, TR74703|c1_g1_i2, TR75771|c0_g1_i5, TR75771|c0_g1_i10, scaffold11293, TR42759|c0_g1_i2, scaffold11292, TR58806|c0_g1_i2, TR75538|c1_g1_i1, TR58806|c0_g1_i2, TR75538|c1_g1_i3, TR57600|c0_g1_i2, TR56901|c0_g1_i1, TR52900|c0_g…	11	67	16.4179
Tyrosine metabolism	map00350	ec:1.1.1.237 - reductase, ec:2.6.1.57 - transaminase, ec:1.2.1.5 - dehydrogenase [NAD(P)+], ec:2.6.1.5 - transaminase, ec:4.1.1.28 - decarboxylase, ec:2.6.1.1 - transaminase, ec:2.3.1.140 - synthase, ec:4.1.1.25 - decarboxylase, ec:2.6.1.9 - transaminase, ec:1.1.1.1 - dehydrogenase	1, 3, 8, 2, 2, 3, 1, 2, 2, 13	scaffold10753, TR51632|c0_g1_i1, TR70672|c0_g2_i2, TR69989|c1_g1_i3, TR56409|c0_g1_i2, TR68787|c0_g2_i1, TR68787|c0_g2_i2, TR67594|c2_g1_i3, TR67365|c0_g1_i1, TR67482|c3_g3_i2, TR67482|c3_g3_i4, Mj_1_GCCAAT_L005_R1_001_(paired)_trimmed_(paired)_contig_18843, TR70672|c0_g2_i2, TR69989|c1_g1_i3, TR70616|c1_g1_i1, TR69452|c1_g1_i2, TR51632|c0_g1_i1, TR70672|c0_g2_i2, TR69989|c1_g1_i3, TR77575|c0_g1_…	10	61	16.3934
Carotenoid biosynthesis	map00906	ec:1.23.5.1 - de-epoxidase, ec:1.14.14.137 - acid 8'-hydroxylase, ec:1.1.1.288 - dehydrogenase, ec:5.3.99.8 - synthase, ec:1.13.11.51 - dioxygenase, ec:2.5.1.32 - synthase	4, 1, 2, 5, 2, 3	Mj_1_GCCAAT_L005_R1_001_(paired)_trimmed_(paired)_contig_13121, TR67905|c0_g2_i2, Mj_1_GCCAAT_L005_R1_001_(paired)_trimmed_(paired)_contig_15031, TR67905|c0_g2_i5, Mj_1_GCCAAT_L005_R1_001_(paired)_trimmed_(paired)_contig_4211, TR56963|c0_g2_i1, TR56963|c1_g2_i2, TR60483|c0_g1_i2, Mj_1_GCCAAT_L005_R1_001_(paired)_trimmed_(paired)_contig_13101, TR56707|c0_g1_i1, TR60483|c1_g1_i2, TR60483|c1_g1_i1, …	6	37	16.2162
Cysteine and methionine metabolism	map00270	ec:1.13.11.20 - dioxygenase, ec:2.6.1.57 - transaminase, ec:6.3.2.3 - synthase, ec:1.1.1.37 - dehydrogenase, ec:2.5.1.47 - synthase, ec:2.6.1.5 - transaminase, ec:2.8.1.2 - sulfurtransferase, ec:2.6.1.1 - transaminase, ec:2.6.1.42 - transaminase, ec:2.5.1.6 - adenosyltransferase, ec:5.3.1.23 - isomerase, ec:2.6.1.44 - transaminase	1, 3, 1, 3, 8, 2, 2, 3, 1, 1, 1, 2	TR63535|c0_g2_i3, TR51632|c0_g1_i1, TR70672|c0_g2_i2, TR69989|c1_g1_i3, TR72492|c0_g1_i2, Mj_1_GCCAAT_L005_R1_001_(paired)_trimmed_(paired)_contig_1051, TR67315|c5_g3_i1, TR65834|c0_g1_i1, TR59788|c0_g1_i2, Mj_1_GCCAAT_L005_R1_001_(paired)_trimmed_(paired)_contig_430, TR58598|c0_g2_i1, TR68095|c0_g3_i1, TR65450|c0_g1_i1, Mj_1_GCCAAT_L005_R1_001_(paired)_trimmed_(paired)_contig_1356, scaffold12772…	12	76	15.7895
Folate biosynthesis	map00790	ec:3.4.19.9 - gamma-glutamyl hydrolase, ec:1.1.1.184 - reductase (NADPH), ec:2.7.7.75 - adenylyltransferase, ec:1.1.1.21 - reductase, ec:2.10.1.1 - molybdotransferase, ec:4.2.1.96 - dehydratase, ec:2.8.1.9 - cofactor sulfurtransferase, ec:6.3.2.17 - synthase	6, 3, 2, 8, 2, 3, 3, 1	TR49718|c0_g1_i1, TR49718|c0_g1_i2, TR67321|c1_g1_i1, scaffold11631, Mj_1_GCCAAT_L005_R1_001_(paired)_trimmed_(paired)_contig_7184, TR40307|c0_g1_i1, TR56894|c1_g1_i1, TR56894|c0_g1_i1, Mj_1_GCCAAT_L005_R1_001_(paired)_trimmed_(paired)_contig_10168, TR75217|c0_g1_i4, TR75217|c0_g1_i5, TR57600|c0_g1_i2, TR56901|c0_g1_i1, TR52900|c0_g1_i2, TR56901|c0_g1_i4, TR56901|c0_g1_i3, TR57600|c0_g1_i1, TR576…	8	51	15.6863
Tryptophan metabolism	map00380	ec:3.5.1.4 - acylamidase, ec:1.2.1.3 - dehydrogenase (NAD+), ec:1.8.1.4 - dehydrogenase, ec:4.1.1.28 - decarboxylase, ec:1.14.14.1 - monooxygenase, ec:3.2.1.147 - myrosinase, ec:2.3.1.9 - C-acetyltransferase, ec:4.2.1.17 - hydratase, ec:1.11.1.6 - equilase	4, 10, 1, 2, 14, 1, 1, 2, 1	TR71136|c0_g1_i5, TR71136|c1_g1_i2, TR71136|c0_g1_i2, TR71136|c1_g1_i3, TR56409|c0_g1_i2, TR68787|c0_g2_i1, TR68787|c0_g2_i2, scaffold11904, TR67594|c2_g1_i3, scaffold11903, TR67365|c0_g1_i1, TR67482|c3_g3_i2, TR67482|c3_g3_i4, Mj_1_GCCAAT_L005_R1_001_(paired)_trimmed_(paired)_contig_18843, TR75071|c0_g1_i1, TR70616|c1_g1_i1, TR69452|c1_g1_i2, TR65699|c5_g3_i5, TR77997|c0_g1_i6, Mj_1_GCCAAT_L005_…	9	58	15.5172
Glycosphingolipid biosynthesis - globo and isoglobo series	map00603	ec:3.2.1.22 - melibiase, ec:3.2.1.52 - hexosaminidase	5, 3	Mj_1_GCCAAT_L005_R1_001_(paired)_trimmed_(paired)_contig_20726, TR77559|c0_g2_i1, TR71761|c0_g1_i2, TR77559|c0_g2_i2, TR77559|c0_g2_i4, TR65791|c0_g1_i1, TR72158|c1_g1_i1, Mj_1_GCCAAT_L005_R1_001_(paired)_trimmed_(paired)_contig_8573	2	13	15.3846
Steroid degradation	map00984	ec:1.1.1.145 - dehydrogenase, ec:1.3.99.5 - 4-dehydrogenase (acceptor)	4, 2	TR66359|c0_g1_i1, TR66581|c0_g1_i2, TR68557|c0_g1_i2, TR66359|c0_g1_i2, Mj_1_GCCAAT_L005_R1_001_(paired)_trimmed_(paired)_contig_10105, TR51811|c1_g1_i1	2	13	15.3846
Sphingolipid metabolism	map00600	ec:3.1.4.12 - phosphodiesterase, ec:3.2.1.22 - melibiase, ec:3.1.3.4 - phosphatase, ec:1.1.1.102 - reductase	2, 5, 1, 2	TR56319|c2_g1_i1, TR70359|c0_g2_i1, Mj_1_GCCAAT_L005_R1_001_(paired)_trimmed_(paired)_contig_20726, TR77559|c0_g2_i1, TR71761|c0_g1_i2, TR77559|c0_g2_i2, TR77559|c0_g2_i4, TR71921|c1_g2_i2, TR74165|c1_g1_i5, TR74165|c1_g1_i3	4	27	14.8148
Purine metabolism	map00230	ec:3.6.1.15 - phosphatase, ec:3.5.4.10 - cyclohydrolase, ec:1.17.4.1 - reductase, ec:2.7.7.4 - adenylyltransferase, ec:1.7.3.3 - urate hydroxylase, ec:3.1.3.5 - uridine 5'-nucleotidase, ec:5.4.2.2 - (alpha-D-glucose-1,6-bisphosphate-dependent), ec:2.4.2.8 - phosphoribosyltransferase, ec:2.1.2.3 - formyltransferase, ec:2.4.2.14 - phosphoribosyldiphosphate 5-amidotransferase, ec:2.7.4.3 - kinase, e…	80, 2, 2, 4, 3, 5, 10, 1, 2, 1, 4, 9, 3, 1, 3, 1	Mj_1_GCCAAT_L005_R1_001_(paired)_trimmed_(paired)_contig_15257, Mj_1_GCCAAT_L005_R1_001_(paired)_trimmed_(paired)_contig_15455, C974762, TR56153|c0_g1_i1, TR62580|c0_g2_i2, Mj_1_GCCAAT_L005_R1_001_(paired)_trimmed_(paired)_contig_36116, TR62580|c0_g2_i5, Mj_1_GCCAAT_L005_R1_001_(paired)_trimmed_(paired)_contig_12625, TR62843|c1_g1_i2, TR65437|c0_g1_i7, TR59058|c0_g1_i1, TR63650|c0_g2_i5, Mj_1_GCC…	16	109	14.6789
Methane metabolism	map00680	ec:6.2.1.1 - ligase, ec:1.1.1.37 - dehydrogenase, ec:1.12.98.1 - F420 hydrogenase, ec:2.1.2.1 - hydroxymethyltransferase, ec:1.1.1.284 - dehydrogenase, ec:4.1.1.31 - carboxylase, ec:2.7.1.11 - phosphohexokinase, ec:4.1.1.25 - decarboxylase, ec:3.1.3.11 - hexose diphosphatase, ec:3.1.3.3 - phosphatase, ec:4.1.2.13 - aldolase, ec:1.1.1.29 - dehydrogenase	4, 3, 1, 2, 4, 4, 1, 2, 9, 1, 8, 1	C972690, Mj_1_GCCAAT_L005_R1_001_(paired)_trimmed_(paired)_contig_15859, TR74616|c1_g1_i4, TR74616|c1_g1_i7, Mj_1_GCCAAT_L005_R1_001_(paired)_trimmed_(paired)_contig_1051, TR67315|c5_g3_i1, TR65834|c0_g1_i1, TR67119|c0_g1_i3, Mj_1_GCCAAT_L005_R1_001_(paired)_trimmed_(paired)_contig_91, TR67588|c0_g1_i1, Mj_1_GCCAAT_L005_R1_001_(paired)_trimmed_(paired)_contig_12179, TR65893|c0_g1_i1, TR73527|c0_g…	12	82	14.6341
Butanoate metabolism	map00650	ec:4.1.1.15 - decarboxylase, ec:2.6.1.96 - transaminase, ec:2.2.1.6 - synthase, ec:1.3.5.1 - dehydrogenase, ec:1.1.1.36 - reductase, ec:6.2.1.2 - acyl-CoA ligase, ec:2.3.1.9 - C-acetyltransferase, ec:4.2.1.17 - hydratase	1, 1, 4, 1, 1, 4, 1, 2	TR65018|c0_g1_i2, Mj_1_GCCAAT_L005_R1_001_(paired)_trimmed_(paired)_contig_11444, Mj_1_GCCAAT_L005_R1_001_(paired)_trimmed_(paired)_contig_21972, Mj_1_GCCAAT_L005_R1_001_(paired)_trimmed_(paired)_contig_4731, TR65143|c0_g2_i2, TR65781|c0_g1_i2, TR67732|c2_g1_i5, Mj_1_GCCAAT_L005_R1_001_(paired)_trimmed_(paired)_contig_2980, C972690, Mj_1_GCCAAT_L005_R1_001_(paired)_trimmed_(paired)_contig_15859, …	8	55	14.5455
Isoquinoline alkaloid biosynthesis	map00950	ec:2.3.1.150 - 7-O-acetyltransferase, ec:2.1.1.140 - ec:2.1.1.140 (S)-coclaurine-N-methyltransferase, ec:2.6.1.57 - transaminase, ec:2.6.1.5 - transaminase, ec:4.1.1.28 - decarboxylase, ec:1.1.1.247 - reductase (NADPH), ec:2.6.1.1 - transaminase, ec:4.1.1.25 - decarboxylase	1, 6, 3, 2, 2, 2, 3, 2	TR75987|c1_g1_i1, TR54878|c0_g1_i6, TR55320|c0_g1_i1, TR54878|c0_g1_i2, TR55320|c0_g1_i2, TR54878|c0_g1_i5, TR55320|c0_g1_i3, TR51632|c0_g1_i1, TR70672|c0_g2_i2, TR69989|c1_g1_i3, TR70672|c0_g2_i2, TR69989|c1_g1_i3, TR70616|c1_g1_i1, TR69452|c1_g1_i2, C962152, TR30961|c0_g1_i1, TR51632|c0_g1_i1, TR70672|c0_g2_i2, TR69989|c1_g1_i3, TR70616|c1_g1_i1, TR69452|c1_g1_i2	8	55	14.5455
Propanoate metabolism	map00640	ec:6.2.1.1 - ligase, ec:1.8.1.4 - dehydrogenase, ec:2.3.1.168 - (2-methylpropanoyl)transferase, ec:6.2.1.5 - ligase (ADP-forming), ec:6.4.1.2 - carboxylase, ec:2.3.1.9 - C-acetyltransferase, ec:4.2.1.17 - hydratase, ec:6.2.1.4 - ligase (GDP-forming)	4, 1, 2, 2, 7, 1, 2, 2	C972690, Mj_1_GCCAAT_L005_R1_001_(paired)_trimmed_(paired)_contig_15859, TR74616|c1_g1_i4, TR74616|c1_g1_i7, TR75071|c0_g1_i1, TR59869|c0_g1_i1, TR66245|c0_g1_i1, TR56398|c0_g1_i1, TR56398|c0_g1_i2, Mj_1_GCCAAT_L005_R1_001_(paired)_trimmed_(paired)_contig_3535, TR71730|c0_g1_i1, TR78089|c0_g2_i3, TR78089|c0_g2_i1, TR71730|c0_g1_i2, TR77917|c0_g1_i11, TR78089|c0_g2_i2, Mj_1_GCCAAT_L005_R1_001_(pai…	8	55	14.5455
Chlorocyclohexane and chlorobenzene degradation	map00361	ec:3.8.1.5 - dehalogenase, ec:1.6.5.7 - reductase, ec:3.1.1.45 - maleylacetate enol-lactonase	6, 1, 4	TR74558|c0_g2_i6, TR74558|c0_g2_i7, TR69405|c0_g1_i2, TR74558|c0_g2_i4, TR69405|c0_g1_i3, TR74558|c0_g2_i5, TR53955|c0_g1_i1, TR60092|c0_g1_i1, TR60092|c0_g1_i2, TR60092|c0_g1_i5, TR57552|c0_g1_i1	3	21	14.2857
Riboflavin metabolism	map00740	ec:1.1.1.193 - reductase, ec:3.5.4.26 - deaminase, ec:3.1.3.2 - phosphatase, ec:2.7.7.2 - synthase	1, 1, 12, 1	TR58400|c0_g1_i2, TR58400|c0_g1_i2, TR61562|c0_g1_i5, TR64061|c0_g1_i4, TR61562|c0_g1_i2, TR64278|c0_g1_i1, TR64061|c0_g1_i5, Mj_1_GCCAAT_L005_R1_001_(paired)_trimmed_(paired)_contig_16186, TR71921|c1_g2_i2, TR72327|c0_g2_i1, TR58928|c0_g1_i4, TR58928|c0_g1_i2, TR58928|c0_g1_i1, Mj_1_GCCAAT_L005_R1_001_(paired)_trimmed_(paired)_contig_1185, TR71435|c0_g1_i1	4	28	14.2857
Valine, leucine and isoleucine biosynthesis	map00290	ec:2.2.1.6 - synthase, ec:2.6.1.42 - transaminase	4, 1	Mj_1_GCCAAT_L005_R1_001_(paired)_trimmed_(paired)_contig_21972, Mj_1_GCCAAT_L005_R1_001_(paired)_trimmed_(paired)_contig_4731, TR65143|c0_g2_i2, TR65781|c0_g1_i2, Mj_1_GCCAAT_L005_R1_001_(paired)_trimmed_(paired)_contig_13191	2	14	14.2857
C5-Branched dibasic acid metabolism	map00660	ec:2.2.1.6 - synthase, ec:4.1.3.17 - aldolase, ec:6.2.1.5 - ligase (ADP-forming)	4, 2, 2	Mj_1_GCCAAT_L005_R1_001_(paired)_trimmed_(paired)_contig_21972, Mj_1_GCCAAT_L005_R1_001_(paired)_trimmed_(paired)_contig_4731, TR65143|c0_g2_i2, TR65781|c0_g1_i2, TR56860|c0_g1_i1, TR56860|c0_g1_i2, TR56398|c0_g1_i1, TR56398|c0_g1_i2	3	22	13.6364
beta-Alanine metabolism	map00410	ec:1.2.1.3 - dehydrogenase (NAD+), ec:4.1.1.15 - decarboxylase, ec:1.2.1.5 - dehydrogenase [NAD(P)+], ec:1.3.1.1 - dehydrogenase (NAD+), ec:4.2.1.17 - hydratase	10, 1, 8, 1, 2	TR56409|c0_g1_i2, TR68787|c0_g2_i1, TR68787|c0_g2_i2, scaffold11904, TR67594|c2_g1_i3, scaffold11903, TR67365|c0_g1_i1, TR67482|c3_g3_i2, TR67482|c3_g3_i4, Mj_1_GCCAAT_L005_R1_001_(paired)_trimmed_(paired)_contig_18843, TR65018|c0_g1_i2, TR56409|c0_g1_i2, TR68787|c0_g2_i1, TR68787|c0_g2_i2, TR67594|c2_g1_i3, TR67365|c0_g1_i1, TR67482|c3_g3_i2, TR67482|c3_g3_i4, Mj_1_GCCAAT_L005_R1_001_(paired)_tr…	5	37	13.5135
Various types of N-glycan biosynthesis	map00513	ec:3.2.1.52 - hexosaminidase, ec:2.4.99.18 - glycotransferase, ec:3.2.1.113 - 1,2-alpha-mannosidase	3, 5, 5	TR65791|c0_g1_i1, TR72158|c1_g1_i1, Mj_1_GCCAAT_L005_R1_001_(paired)_trimmed_(paired)_contig_8573, TR60131|c0_g1_i3, Mj_1_GCCAAT_L005_R1_001_(paired)_trimmed_(paired)_contig_4720, TR60131|c0_g1_i1, TR60131|c0_g1_i2, TR66728|c0_g1_i1, Mj_1_GCCAAT_L005_R1_001_(paired)_trimmed_(paired)_contig_274, TR71983|c1_g1_i14, TR71983|c1_g1_i1, TR60818|c1_g1_i1, TR69499|c1_g1_i1	3	23	13.0435
Pantothenate and CoA biosynthesis	map00770	ec:1.2.1.3 - dehydrogenase (NAD+), ec:2.2.1.6 - synthase, ec:1.3.1.1 - dehydrogenase (NAD+), ec:2.6.1.42 - transaminase	10, 4, 1, 1	TR56409|c0_g1_i2, TR68787|c0_g2_i1, TR68787|c0_g2_i2, scaffold11904, TR67594|c2_g1_i3, scaffold11903, TR67365|c0_g1_i1, TR67482|c3_g3_i2, TR67482|c3_g3_i4, Mj_1_GCCAAT_L005_R1_001_(paired)_trimmed_(paired)_contig_18843, Mj_1_GCCAAT_L005_R1_001_(paired)_trimmed_(paired)_contig_21972, Mj_1_GCCAAT_L005_R1_001_(paired)_trimmed_(paired)_contig_4731, TR65143|c0_g2_i2, TR65781|c0_g1_i2, TR58400|c0_g1_i2…	4	31	12.9032
Biosynthesis of unsaturated fatty acids	map01040	ec:1.14.19.1 - 9-desaturase, ec:2.3.1.16 - C-acyltransferase	1, 1	TR71345|c0_g2_i2, Mj_1_GCCAAT_L005_R1_001_(paired)_trimmed_(paired)_contig_768	2	16	12.5
Cutin, suberine and wax biosynthesis	map00073	ec:2.3.1.20 - O-acyltransferase	1	TR77367|c2_g3_i4	1	8	12.5
Glycosphingolipid biosynthesis - ganglio series	map00604	ec:3.2.1.52 - hexosaminidase	3	TR65791|c0_g1_i1, TR72158|c1_g1_i1, Mj_1_GCCAAT_L005_R1_001_(paired)_trimmed_(paired)_contig_8573	1	8	12.5
Limonene and pinene degradation	map00903	ec:1.2.1.3 - dehydrogenase (NAD+), ec:4.2.1.17 - hydratase	10, 2	TR56409|c0_g1_i2, TR68787|c0_g2_i1, TR68787|c0_g2_i2, scaffold11904, TR67594|c2_g1_i3, scaffold11903, TR67365|c0_g1_i1, TR67482|c3_g3_i2, TR67482|c3_g3_i4, Mj_1_GCCAAT_L005_R1_001_(paired)_trimmed_(paired)_contig_18843, TR68655|c1_g1_i1, TR68778|c0_g1_i1	2	16	12.5
Sulfur metabolism	map00920	ec:2.7.7.4 - adenylyltransferase, ec:2.5.1.47 - synthase, ec:1.13.11.18 - dioxygenase, ec:3.1.3.7 - nucleotidase, ec:1.8.7.1 - sulfite reductase (ferredoxin), ec:2.8.1.1 - sulfurtransferase	4, 8, 3, 3, 3, 4	TR47295|c0_g1_i2, TR69679|c0_g1_i1, TR47295|c0_g1_i1, TR69679|c0_g1_i2, TR59788|c0_g1_i2, Mj_1_GCCAAT_L005_R1_001_(paired)_trimmed_(paired)_contig_430, TR58598|c0_g2_i1, TR68095|c0_g3_i1, TR65450|c0_g1_i1, Mj_1_GCCAAT_L005_R1_001_(paired)_trimmed_(paired)_contig_1356, scaffold12772, scaffold12773, TR65315|c0_g1_i1, TR64312|c1_g1_i2, TR65315|c0_g1_i2, TR73341|c0_g1_i5, TR73341|c0_g1_i8, TR73357|c0…	6	48	12.5
Ubiquinone and other terpenoid-quinone biosynthesis	map00130	ec:1.1.1.237 - reductase, ec:1.6.5.2 - dehydrogenase (quinone), ec:2.6.1.5 - transaminase, ec:6.2.1.26 - ligase, ec:6.2.1.12 - ligase	1, 2, 2, 5, 1	scaffold10753, TR71233|c0_g1_i1, TR53955|c0_g1_i1, TR70672|c0_g2_i2, TR69989|c1_g1_i3, C972690, Mj_1_GCCAAT_L005_R1_001_(paired)_trimmed_(paired)_contig_15859, TR57087|c0_g1_i2, TR74616|c1_g1_i4, TR74616|c1_g1_i7, Mj_1_GCCAAT_L005_R1_001_(paired)_trimmed_(paired)_contig_3698	5	40	12.5
Steroid biosynthesis	map00100	ec:2.1.1.41 - 24-C-methyltransferase, ec:1.14.14.17 - monooxygenase, ec:2.1.1.143 - C-methyltransferase	1, 1, 1	TR61926|c0_g1_i1, Mj_1_GCCAAT_L005_R1_001_(paired)_trimmed_(paired)_contig_10669, TR61926|c0_g1_i1	3	25	12
Vitamin B6 metabolism	map00750	ec:1.1.1.65 - 4-dehydrogenase, ec:1.4.3.5 - 5'-phosphate synthase, ec:4.3.3.6 - 5'-phosphate synthase (glutamine hydrolysing)	5, 3, 4	TR52900|c0_g1_i2, TR61893|c0_g1_i5, C969880, TR58858|c0_g1_i1, TR61893|c0_g1_i3, TR61047|c0_g1_i1, TR64899|c0_g2_i1, Mj_1_GCCAAT_L005_R1_001_(paired)_trimmed_(paired)_contig_1006, Mj_1_GCCAAT_L005_R1_001_(paired)_trimmed_(paired)_contig_624, TR59547|c1_g1_i1, TR59547|c1_g1_i4, TR59547|c1_g1_i3	3	25	12
Aminobenzoate degradation	map00627	ec:3.5.1.4 - acylamidase, ec:1.14.13.82 - monooxygenase, ec:1.6.5.7 - reductase, ec:1.14.14.1 - monooxygenase, ec:4.2.1.17 - hydratase, ec:3.1.3.41 - nitrophenyl phosphatase	4, 4, 1, 14, 2, 3	TR71136|c0_g1_i5, TR71136|c1_g1_i2, TR71136|c0_g1_i2, TR71136|c1_g1_i3, TR58785|c0_g1_i4, TR58785|c0_g1_i3, TR58785|c0_g1_i2, TR58785|c0_g1_i1, TR53955|c0_g1_i1, TR65699|c5_g3_i5, TR77997|c0_g1_i6, Mj_1_GCCAAT_L005_R1_001_(paired)_trimmed_(paired)_contig_2438, TR67306|c0_g1_i4, TR78194|c0_g1_i2, TR70581|c0_g1_i1, TR72750|c3_g1_i2, Mj_1_GCCAAT_L005_R1_001_(paired)_trimmed_(paired)_contig_3652, Mj_…	6	51	11.7647
N-Glycan biosynthesis	map00510	ec:2.4.1.144 - 4-beta-N-acetylglucosaminyltransferase, ec:3.2.1.106 - glucosidase, ec:2.4.99.18 - glycotransferase, ec:3.2.1.113 - 1,2-alpha-mannosidase	2, 1, 5, 5	TR76166|c0_g1_i1, TR76166|c0_g2_i1, TR78546|c0_g1_i1, TR60131|c0_g1_i3, Mj_1_GCCAAT_L005_R1_001_(paired)_trimmed_(paired)_contig_4720, TR60131|c0_g1_i1, TR60131|c0_g1_i2, TR66728|c0_g1_i1, Mj_1_GCCAAT_L005_R1_001_(paired)_trimmed_(paired)_contig_274, TR71983|c1_g1_i14, TR71983|c1_g1_i1, TR60818|c1_g1_i1, TR69499|c1_g1_i1	4	34	11.7647
Arachidonic acid metabolism	map00590	ec:1.1.1.184 - reductase (NADPH), ec:1.14.14.1 - monooxygenase, ec:1.11.1.9 - peroxidase	3, 14, 1	TR56894|c1_g1_i1, TR56894|c0_g1_i1, Mj_1_GCCAAT_L005_R1_001_(paired)_trimmed_(paired)_contig_10168, TR65699|c5_g3_i5, TR77997|c0_g1_i6, Mj_1_GCCAAT_L005_R1_001_(paired)_trimmed_(paired)_contig_2438, TR67306|c0_g1_i4, TR78194|c0_g1_i2, TR70581|c0_g1_i1, TR72750|c3_g1_i2, Mj_1_GCCAAT_L005_R1_001_(paired)_trimmed_(paired)_contig_3652, Mj_1_GCCAAT_L005_R1_001_(paired)_trimmed_(paired)_contig_2610, TR…	3	26	11.5385
Naphthalene degradation	map00626	ec:1.1.1.1 - dehydrogenase	13	TR57222|c0_g1_i2, TR63515|c0_g2_i2, TR56963|c0_g2_i1, Mj_1_GCCAAT_L005_R1_001_(paired)_trimmed_(paired)_contig_23290, TR65893|c0_g1_i1, TR73527|c0_g1_i7, TR73527|c0_g1_i6, TR56313|c0_g1_i1, TR68557|c0_g1_i2, TR68557|c0_g2_i2, Mj_1_GCCAAT_L005_R1_001_(paired)_trimmed_(paired)_contig_9403, TR56963|c1_g2_i2, TR79055|c2_g2_i8	1	9	11.1111
Pyrimidine metabolism	map00240	ec:2.4.2.9 - phosphoribosyltransferase, ec:2.7.1.48 - kinase, ec:1.17.4.1 - reductase, ec:3.1.3.5 - uridine 5'-nucleotidase, ec:6.3.5.5 - synthase (glutamine-hydrolysing), ec:1.3.1.1 - dehydrogenase (NAD+), ec:2.7.4.6 - kinase	3, 4, 2, 5, 1, 1, 3	TR78565|c2_g1_i4, TR78565|c2_g1_i2, TR78565|c2_g1_i5, TR78565|c2_g1_i4, TR78565|c2_g1_i2, TR78595|c0_g1_i1, TR78565|c2_g1_i5, TR63570|c0_g1_i1, TR66318|c0_g1_i1, Mj_1_GCCAAT_L005_R1_001_(paired)_trimmed_(paired)_contig_4051, TR64278|c0_g1_i1, TR70703|c0_g2_i1, Mj_1_GCCAAT_L005_R1_001_(paired)_trimmed_(paired)_contig_16186, TR66381|c3_g2_i3, scaffold13867, TR58400|c0_g1_i2, Mj_1_GCCAAT_L005_R1_001…	7	65	10.7692
Histidine metabolism	map00340	ec:1.2.1.3 - dehydrogenase (NAD+), ec:1.2.1.5 - dehydrogenase [NAD(P)+], ec:2.4.2.17 - phosphoribosyltransferase, ec:2.6.1.9 - transaminase	10, 8, 6, 2	TR56409|c0_g1_i2, TR68787|c0_g2_i1, TR68787|c0_g2_i2, scaffold11904, TR67594|c2_g1_i3, scaffold11903, TR67365|c0_g1_i1, TR67482|c3_g3_i2, TR67482|c3_g3_i4, Mj_1_GCCAAT_L005_R1_001_(paired)_trimmed_(paired)_contig_18843, TR56409|c0_g1_i2, TR68787|c0_g2_i1, TR68787|c0_g2_i2, TR67594|c2_g1_i3, TR67365|c0_g1_i1, TR67482|c3_g3_i2, TR67482|c3_g3_i4, Mj_1_GCCAAT_L005_R1_001_(paired)_trimmed_(paired)_con…	4	38	10.5263
Peptidoglycan biosynthesis	map00550	ec:1.3.1.98 - dehydrogenase, ec:2.5.1.31 - synthase [(2E,6E)-farnesyl-diphosphate specific]	2, 4	TR65650|c1_g1_i2, TR65650|c1_g1_i1, TR60683|c0_g1_i2, TR60683|c0_g1_i3, TR60887|c0_g1_i2, TR60683|c0_g1_i4	2	19	10.5263
Biotin metabolism	map00780	ec:2.3.1.41 - synthase I, ec:1.1.1.100 - reductase	4, 3	TR64043|c0_g1_i2, TR63337|c0_g1_i2, TR63337|c0_g1_i1, Mj_1_GCCAAT_L005_R1_001_(paired)_trimmed_(paired)_contig_17661, TR47892|c0_g1_i2, TR56963|c0_g2_i1, TR56963|c1_g2_i2	2	20	10
Glycosaminoglycan biosynthesis - heparan sulfate / heparin	map00534	ec:2.4.1.223 - 4-alpha-N-acetylglucosaminyltransferase	2	TR62844|c0_g1_i2, TR64381|c1_g1_i1	1	11	9.09091
Nicotinate and nicotinamide metabolism	map00760	ec:6.3.4.21 - phosphoribosyltransferase, ec:2.7.1.23 - kinase, ec:3.1.3.5 - uridine 5'-nucleotidase, ec:2.4.2.19 - diphosphorylase (carboxylating), ec:1.6.1.1 - transhydrogenase (Si-specific)	3, 3, 5, 3, 1	TR65058|c0_g1_i2, Mj_1_GCCAAT_L005_R1_001_(paired)_trimmed_(paired)_contig_19529, TR65058|c0_g1_i1, Mj_1_GCCAAT_L005_R1_001_(paired)_trimmed_(paired)_contig_21766, TR73999|c0_g2_i1, TR71360|c1_g1_i1, Mj_1_GCCAAT_L005_R1_001_(paired)_trimmed_(paired)_contig_4051, TR64278|c0_g1_i1, TR70703|c0_g2_i1, Mj_1_GCCAAT_L005_R1_001_(paired)_trimmed_(paired)_contig_16186, TR66381|c3_g2_i3, TR65058|c0_g1_i2, …	5	59	8.47458
D-Glutamine and D-glutamate metabolism	map00471	ec:3.5.1.2 - glutaminase I	3	TR59547|c1_g1_i4, TR59547|c1_g1_i3, TR59547|c1_g1_i1	1	12	8.33333
Arginine and proline metabolism	map00330	ec:3.5.1.4 - acylamidase, ec:1.2.1.3 - dehydrogenase (NAD+), ec:1.2.1.88 - gamma-semialdehyde dehydrogenase, ec:1.14.11.2 - 4-dioxygenase, ec:3.4.11.5 - aminopeptidase, ec:4.1.1.19 - decarboxylase, ec:2.6.1.1 - transaminase	4, 10, 1, 3, 7, 2, 3	TR71136|c0_g1_i5, TR71136|c1_g1_i2, TR71136|c0_g1_i2, TR71136|c1_g1_i3, TR56409|c0_g1_i2, TR68787|c0_g2_i1, TR68787|c0_g2_i2, scaffold11904, TR67594|c2_g1_i3, scaffold11903, TR67365|c0_g1_i1, TR67482|c3_g3_i2, TR67482|c3_g3_i4, Mj_1_GCCAAT_L005_R1_001_(paired)_trimmed_(paired)_contig_18843, TR56409|c0_g1_i2, scaffold12233, TR55487|c0_g1_i1, scaffold12231, TR60980|c0_g1_i2, TR67431|c1_g1_i2, TR612…	7	86	8.13953
Aflatoxin biosynthesis	map00254	ec:6.4.1.2 - carboxylase	7	Mj_1_GCCAAT_L005_R1_001_(paired)_trimmed_(paired)_contig_3535, TR71730|c0_g1_i1, TR78089|c0_g2_i3, TR78089|c0_g2_i1, TR71730|c0_g1_i2, TR77917|c0_g1_i11, TR78089|c0_g2_i2	1	13	7.69231
Linoleic acid metabolism	map00591	ec:1.14.14.1 - monooxygenase	14	TR65699|c5_g3_i5, TR77997|c0_g1_i6, Mj_1_GCCAAT_L005_R1_001_(paired)_trimmed_(paired)_contig_2438, TR67306|c0_g1_i4, TR78194|c0_g1_i2, TR70581|c0_g1_i1, TR72750|c3_g1_i2, Mj_1_GCCAAT_L005_R1_001_(paired)_trimmed_(paired)_contig_3652, Mj_1_GCCAAT_L005_R1_001_(paired)_trimmed_(paired)_contig_2610, TR67306|c0_g1_i3, TR67306|c0_g1_i2, TR73843|c0_g1_i1, TR67256|c1_g2_i1, TR47900|c0_g1_i1	1	13	7.69231
Phenazine biosynthesis	map00405	ec:4.1.3.27 - synthase	2	TR47295|c0_g1_i2, TR47295|c0_g1_i1	1	13	7.69231
Lysine degradation	map00310	ec:1.2.1.3 - dehydrogenase (NAD+), ec:1.8.1.4 - dehydrogenase, ec:2.3.1.9 - C-acetyltransferase, ec:4.2.1.17 - hydratase	10, 1, 1, 2	TR56409|c0_g1_i2, TR68787|c0_g2_i1, TR68787|c0_g2_i2, scaffold11904, TR67594|c2_g1_i3, scaffold11903, TR67365|c0_g1_i1, TR67482|c3_g3_i2, TR67482|c3_g3_i4, Mj_1_GCCAAT_L005_R1_001_(paired)_trimmed_(paired)_contig_18843, TR75071|c0_g1_i1, Mj_1_GCCAAT_L005_R1_001_(paired)_trimmed_(paired)_contig_768, TR68655|c1_g1_i1, TR68778|c0_g1_i1	4	53	7.54717
Lysine biosynthesis	map00300	ec:2.6.1.57 - transaminase, ec:1.17.1.8 - reductase	3, 1	TR51632|c0_g1_i1, TR70672|c0_g2_i2, TR69989|c1_g1_i3, TR66822|c0_g1_i11	2	28	7.14286
Neomycin, kanamycin and gentamicin biosynthesis	map00524	ec:2.7.1.2 - glucokinase (phosphorylating), ec:2.7.1.1 - hexokinase type IV glucokinase	1, 6	Mj_1_GCCAAT_L005_R1_001_(paired)_trimmed_(paired)_contig_24277, TR64027|c0_g1_i3, TR71146|c1_g1_i1, Mj_1_GCCAAT_L005_R1_001_(paired)_trimmed_(paired)_contig_24277, TR71146|c1_g1_i2, TR72901|c0_g1_i1, TR71146|c1_g1_i4	2	28	7.14286
Phosphonate and phosphinate metabolism	map00440	ec:2.7.8.1 - EPT, ec:2.7.8.2 - cholinephosphotransferase	1, 1	TR71229|c1_g2_i1, TR71229|c1_g2_i1	2	29	6.89655
Glucosinolate biosynthesis	map00966	ec:2.6.1.42 - transaminase	1	Mj_1_GCCAAT_L005_R1_001_(paired)_trimmed_(paired)_contig_13191	1	15	6.66667
Glycosaminoglycan degradation	map00531	ec:3.2.1.52 - hexosaminidase	3	TR65791|c0_g1_i1, TR72158|c1_g1_i1, Mj_1_GCCAAT_L005_R1_001_(paired)_trimmed_(paired)_contig_8573	1	15	6.66667
Anthocyanin biosynthesis	map00942	ec:2.4.1.115 - 3-O-glucosyltransferase	21	Mj_1_GCCAAT_L005_R1_001_(paired)_trimmed_(paired)_contig_15378, Mj_1_GCCAAT_L005_R1_001_(paired)_trimmed_(paired)_contig_18129, TR70221|c1_g2_i6, TR79847|c3_g9_i3, TR72761|c4_g1_i2, TR72761|c4_g1_i1, TR67379|c0_g1_i1, Mj_1_GCCAAT_L005_R1_001_(paired)_trimmed_(paired)_contig_36930, TR41170|c0_g1_i1, TR67379|c0_g1_i2, Mj_1_GCCAAT_L005_R1_001_(paired)_trimmed_(paired)_contig_11167, Mj_1_GCCAAT_L005_…	1	16	6.25
Flavone and flavonol biosynthesis	map00944	ec:1.14.14.82 - 3'-monooxygenase, ec:1.14.14.81 - 3',5'-hydroxylase	4, 4	TR56301|c0_g1_i2, TR68133|c0_g2_i1, TR54391|c0_g1_i3, TR56301|c0_g1_i4, TR60529|c0_g1_i1, TR62340|c0_g1_i1, TR62340|c0_g1_i2, TR56301|c0_g1_i4	2	32	6.25
Benzoate degradation	map00362	ec:4.1.3.17 - aldolase, ec:2.3.1.16 - C-acyltransferase, ec:2.3.1.9 - C-acetyltransferase, ec:4.2.1.17 - hydratase	2, 1, 1, 2	TR56860|c0_g1_i1, TR56860|c0_g1_i2, Mj_1_GCCAAT_L005_R1_001_(paired)_trimmed_(paired)_contig_768, Mj_1_GCCAAT_L005_R1_001_(paired)_trimmed_(paired)_contig_768, TR68655|c1_g1_i1, TR68778|c0_g1_i1	4	69	5.7971
Fluorobenzoate degradation	map00364	ec:3.1.1.45 - maleylacetate enol-lactonase	4	TR60092|c0_g1_i1, TR60092|c0_g1_i2, TR60092|c0_g1_i5, TR57552|c0_g1_i1	1	18	5.55556
Styrene degradation	map00643	ec:3.5.1.4 - acylamidase	4	TR71136|c0_g1_i5, TR71136|c1_g1_i2, TR71136|c0_g1_i2, TR71136|c1_g1_i3	1	18	5.55556
Indole alkaloid biosynthesis	map00901	ec:4.3.3.2 - synthase	2	TR68644|c0_g1_i1, scaffold12125	1	19	5.26316
Monoterpenoid biosynthesis	map00902	ec:1.3.1.81 - reductase, ec:1.14.19.62 - synthase	1, 2	TR78550|c3_g2_i3, Mj_1_GCCAAT_L005_R1_001_(paired)_trimmed_(paired)_contig_7975, TR68370|c1_g2_i1	2	43	4.65116
Toluene degradation	map00623	ec:3.1.1.45 - maleylacetate enol-lactonase	4	TR60092|c0_g1_i1, TR60092|c0_g1_i2, TR60092|c0_g1_i5, TR57552|c0_g1_i1	1	25	4
Diterpenoid biosynthesis	map00904	ec:1.14.11.15 - 3beta-dioxygenase	5	Mj_1_GCCAAT_L005_R1_001_(paired)_trimmed_(paired)_contig_22382, scaffold1091, Mj_1_GCCAAT_L005_R1_001_(paired)_trimmed_(paired)_contig_1292, TR68834|c2_g1_i1, TR68834|c2_g1_i2	1	50	2
Sesquiterpenoid and triterpenoid biosynthesis	map00909	ec:1.14.14.17 - monooxygenase	1	Mj_1_GCCAAT_L005_R1_001_(paired)_trimmed_(paired)_contig_10669	1	80	1.25

## Sheet: TransM12_KEGG
Table S13 KEGG pathway mapping of transcript modules sharing high correlation coefficient (PCC > 0.7) with the identified metabolite modules in Mallotus japonicus.
Pathway	Pathway ID	Enzyme	#Seqs of Enzyme	Seqs	#Enzs in Pathway	#KEGG Enzymes	Ratio of enzymes in our sample in kegg enzymes (%)
Drug metabolism - cytochrome P450	map00982	ec:1.2.1.5 - dehydrogenase [NAD(P)+], ec:1.1.1.1 - dehydrogenase, ec:1.14.13.8 - monooxygenase, ec:2.5.1.18 - transferase, ec:1.14.14.1 - monooxygenase	15, 5, 6, 14, 6	TR60538|c0_g1_i4, TR59948|c0_g1_i5, C964792, TR56938|c0_g1_i2, TR56938|c0_g1_i1, TR68176|c3_g1_i5, TR68176|c3_g1_i4, TR68176|c3_g1_i3, TR68176|c3_g1_i2, TR68176|c3_g1_i1, Mj_1_GCCAAT_L005_R1_001_(paired)_trimmed_(paired)_contig_5182, TR59948|c0_g1_i4, TR59948|c0_g1_i3, TR59948|c0_g1_i2, TR59948|c0_g1_i1, TR71294|c2_g1_i6, Mj_1_GCCAAT_L005_R1_001_(paired)_trimmed_(paired)_contig_31943, TR71294|c2_…	5	8	62.5
alpha-Linolenic acid metabolism	map00592	ec:1.1.1.1 - dehydrogenase, ec:4.2.1.17 - hydratase, ec:2.1.1.141 - O-methyltransferase, ec:1.13.11.12 - 13S-lipoxygenase, ec:1.3.3.6 - oxidase, ec:3.1.1.4 - A2, ec:3.1.1.32 - A1	5, 1, 2, 3, 2, 3, 2	TR71294|c2_g1_i6, Mj_1_GCCAAT_L005_R1_001_(paired)_trimmed_(paired)_contig_31943, TR71294|c2_g1_i5, TR71294|c1_g1_i5, TR79055|c2_g2_i4, TR79248|c2_g3_i3, Mj_1_GCCAAT_L005_R1_001_(paired)_trimmed_(paired)_contig_26494, TR58812|c0_g1_i1, Mj_1_GCCAAT_L005_R1_001_(paired)_trimmed_(paired)_contig_22126, TR79365|c0_g1_i6, TR79586|c0_g1_i14, Mj_1_GCCAAT_L005_R1_001_(paired)_trimmed_(paired)_contig_19507…	7	12	58.3333
Flavonoid biosynthesis	map00941	ec:5.5.1.6 - isomerase, ec:1.1.1.219 - 4-reductase, ec:1.17.1.3 - reductase, ec:2.3.1.170 - synthase, ec:1.14.14.91 - 4-monooxygenase, ec:1.14.14.81 - 3',5'-hydroxylase, ec:1.1.1.234 - 4-reductase, ec:1.14.14.82 - 3'-monooxygenase, ec:1.14.11.9 - 3-dioxygenase, ec:1.14.20.6 - synthase, ec:2.3.1.74 - synthase, ec:2.1.1.104 - O-methyltransferase	1, 10, 1, 1, 2, 5, 2, 1, 4, 10, 5, 1	TR65373|c0_g1_i1, TR54252|c0_g1_i1, TR61374|c0_g1_i3, TR33710|c0_g1_i1, TR69323|c0_g1_i5, TR69323|c0_g1_i3, TR75507|c0_g1_i2, TR67605|c0_g1_i4, TR77258|c5_g1_i4, Mj_1_GCCAAT_L005_R1_001_(paired)_trimmed_(paired)_contig_7838, TR79055|c2_g2_i4, TR70204|c1_g1_i2, TR62888|c0_g1_i1, Mj_1_GCCAAT_L005_R1_001_(paired)_trimmed_(paired)_contig_253, TR67234|c1_g2_i2, TR68451|c0_g2_i4, C968328, TR63574|c0_g1…	12	22	54.5455
Metabolism of xenobiotics by cytochrome P450	map00980	ec:1.2.1.5 - dehydrogenase [NAD(P)+], ec:1.1.1.1 - dehydrogenase, ec:2.5.1.18 - transferase, ec:3.3.2.9 - epoxide hydrolase, ec:1.14.14.1 - monooxygenase	15, 5, 14, 8, 6	TR60538|c0_g1_i4, TR59948|c0_g1_i5, C964792, TR56938|c0_g1_i2, TR56938|c0_g1_i1, TR68176|c3_g1_i5, TR68176|c3_g1_i4, TR68176|c3_g1_i3, TR68176|c3_g1_i2, TR68176|c3_g1_i1, Mj_1_GCCAAT_L005_R1_001_(paired)_trimmed_(paired)_contig_5182, TR59948|c0_g1_i4, TR59948|c0_g1_i3, TR59948|c0_g1_i2, TR59948|c0_g1_i1, TR71294|c2_g1_i6, Mj_1_GCCAAT_L005_R1_001_(paired)_trimmed_(paired)_contig_31943, TR71294|c2_…	5	10	50
Other glycan degradation	map00511	ec:3.2.1.45 - psychosine hydrolase, ec:3.2.1.96 - endo-beta-N-acetylglucosaminidase, ec:3.2.1.23 - lactase (ambiguous), ec:3.2.1.24 - alpha-D-mannosidase	3, 1, 2, 3	TR51456|c0_g1_i1, Mj_1_GCCAAT_L005_R1_001_(paired)_trimmed_(paired)_contig_4875, TR61348|c0_g1_i1, TR64987|c0_g1_i2, TR74361|c0_g1_i2, TR74361|c0_g1_i3, TR60818|c2_g1_i1, Mj_1_GCCAAT_L005_R1_001_(paired)_trimmed_(paired)_contig_66992, TR60818|c2_g1_i2	4	9	44.4444
Phenylpropanoid biosynthesis	map00940	ec:2.1.1.146 - O-methyltransferase, ec:1.2.1.68 - dehydrogenase, ec:1.1.1.195 - dehydrogenase, ec:1.14.14.91 - 4-monooxygenase, ec:3.2.1.21 - gentiobiase, ec:1.2.1.44 - reductase, ec:4.3.1.24 - ammonia-lyase, ec:2.1.1.68 - O-methyltransferase, ec:6.2.1.12 - ligase, ec:1.11.1.7 - lactoperoxidase, ec:2.1.1.104 - O-methyltransferase, ec:4.3.1.25 - ammonia-lyase	7, 3, 10, 2, 13, 1, 1, 4, 2, 18, 1, 1	TR51372|c0_g1_i2, scaffold13906, TR73260|c0_g2_i2, TR78355|c0_g3_i1, TR73260|c0_g2_i1, TR69660|c0_g2_i1, TR78355|c0_g4_i2, TR56938|c0_g1_i2, TR56938|c0_g1_i1, C964792, TR66908|c0_g2_i5, TR59048|c0_g1_i3, TR68293|c0_g1_i3, TR68369|c0_g1_i1, TR68293|c0_g1_i2, Mj_1_GCCAAT_L005_R1_001_(paired)_trimmed_(paired)_contig_12810, Mj_1_GCCAAT_L005_R1_001_(paired)_trimmed_(paired)_contig_26755, TR59048|c0_g1…	12	30	40
Zeatin biosynthesis	map00908	ec:2.4.1.215 - O-beta-D-glucosyltransferase, ec:2.5.1.75 - dimethylallyltransferase, ec:2.5.1.27 - dimethylallyltransferase, ec:2.4.1.203 - O-beta-D-glucosyltransferase	1, 2, 2, 1	TR37443|c1_g2_i1, TR63400|c0_g1_i3, TR63400|c0_g1_i2, TR63400|c0_g1_i3, TR63400|c0_g1_i2, TR37443|c1_g2_i1	4	10	40
Phenylalanine, tyrosine and tryptophan biosynthesis	map00400	ec:1.3.1.12 - dehydrogenase, ec:4.2.3.5 - synthase, ec:2.6.1.1 - transaminase, ec:1.3.1.13 - dehydrogenase (NADP+), ec:1.3.1.78 - dehydrogenase (NADP+), ec:2.7.1.71 - kinase, ec:2.6.1.57 - transaminase, ec:2.6.1.9 - transaminase, ec:2.6.1.78 - aminotransferase, ec:4.2.1.51 - dehydratase, ec:2.6.1.5 - transaminase, ec:2.6.1.79 - aminotransferase, ec:4.2.1.91 - dehydratase, ec:5.4.99.5 - mutase	2, 2, 2, 2, 2, 4, 2, 1, 1, 3, 1, 1, 2, 1	TR70800|c1_g1_i1, TR70800|c1_g1_i3, TR72981|c0_g1_i2, Mj_1_GCCAAT_L005_R1_001_(paired)_trimmed_(paired)_contig_20221, TR45804|c0_g1_i1, TR71621|c0_g2_i2, TR70800|c1_g1_i1, TR70800|c1_g1_i3, TR70800|c1_g1_i1, TR70800|c1_g1_i3, TR63373|c0_g1_i3, scaffold13532, Mj_1_GCCAAT_L005_R1_001_(paired)_trimmed_(paired)_contig_17298, TR67927|c0_g2_i1, TR45804|c0_g1_i1, TR71621|c0_g2_i2, TR71621|c0_g2_i2, TR71…	14	39	35.8974
Fatty acid biosynthesis	map00061	ec:2.3.1.85 - synthase system, ec:3.1.2.14 - hydrolase, ec:1.1.1.100 - reductase, ec:1.14.19.2 - 9-desaturase, ec:2.3.1.86 - synthase system, ec:6.2.1.3 - ligase	4, 1, 3, 3, 2, 3	Mj_1_GCCAAT_L005_R1_001_(paired)_trimmed_(paired)_contig_49285, TR61240|c1_g1_i1, TR67098|c0_g1_i1, TR54499|c0_g1_i2, TR74236|c1_g1_i9, TR54499|c0_g1_i2, Mj_1_GCCAAT_L005_R1_001_(paired)_trimmed_(paired)_contig_49285, TR61240|c1_g1_i1, Mj_1_GCCAAT_L005_R1_001_(paired)_trimmed_(paired)_contig_4365, TR56689|c0_g1_i1, TR60476|c0_g4_i1, Mj_1_GCCAAT_L005_R1_001_(paired)_trimmed_(paired)_contig_11501, …	6	17	35.2941
Betalain biosynthesis	map00965	ec:2.1.1.6 - O-methyltransferase	1	TR73260|c0_g2_i1	1	3	33.3333
Drug metabolism - other enzymes	map00983	ec:2.7.1.48 - kinase, ec:3.5.2.2 - hydantoinase, ec:3.1.1.1 - ali-esterase, ec:1.1.1.205 - dehydrogenase, ec:2.5.1.18 - transferase, ec:2.3.1.5 - N-acetyltransferase	1, 7, 36, 2, 14, 3	TR71374|c0_g1_i2, TR69841|c1_g1_i4, TR69841|c1_g1_i3, TR69841|c1_g1_i2, TR69841|c1_g1_i5, TR70632|c0_g1_i2, TR70632|c0_g1_i5, TR70632|c0_g1_i7, Mj_1_GCCAAT_L005_R1_001_(paired)_trimmed_(paired)_contig_14124, TR64075|c0_g1_i1, TR52193|c0_g1_i2, TR54775|c0_g1_i3, TR54775|c0_g1_i2, TR63798|c0_g1_i5, TR68415|c0_g1_i1, TR69242|c0_g1_i2, TR69242|c0_g1_i1, TR54775|c0_g1_i6, TR65240|c0_g2_i5, TR65240|c0_…	6	18	33.3333
Lipoic acid metabolism	map00785	ec:2.8.1.8 - synthase	2	Mj_1_GCCAAT_L005_R1_001_(paired)_trimmed_(paired)_contig_14124, scaffold10245	1	3	33.3333
Glycolysis / Gluconeogenesis	map00010	ec:1.2.1.3 - dehydrogenase (NAD+), ec:4.1.1.49 - carboxykinase (ATP), ec:5.3.1.9 - isomerase, ec:4.1.1.1 - decarboxylase, ec:2.3.1.12 - acetyltransferase, ec:6.2.1.1 - ligase, ec:1.2.1.5 - dehydrogenase [NAD(P)+], ec:4.2.1.11 - hydratase, ec:1.1.1.1 - dehydrogenase, ec:2.7.1.2 - glucokinase (phosphorylating), ec:1.1.1.2 - dehydrogenase (NADP+), ec:4.1.2.13 - aldolase, ec:2.7.1.11 - phosphohexokin…	15, 1, 1, 5, 1, 3, 15, 2, 5, 1, 2, 1, 2, 3	TR59948|c0_g1_i5, TR56938|c0_g1_i2, TR56938|c0_g1_i1, TR75637|c1_g1_i2, scaffold12730, TR68176|c3_g1_i5, TR68176|c3_g1_i4, TR68176|c3_g1_i3, TR68176|c3_g1_i2, TR68176|c3_g1_i1, Mj_1_GCCAAT_L005_R1_001_(paired)_trimmed_(paired)_contig_5182, TR59948|c0_g1_i4, TR59948|c0_g1_i3, TR59948|c0_g1_i2, TR59948|c0_g1_i1, TR73014|c3_g2_i8, TR51557|c0_g1_i1, Mj_1_GCCAAT_L005_R1_001_(paired)_trimmed_(paired)_c…	14	47	29.7872
Glycerolipid metabolism	map00561	ec:2.3.1.20 - O-acyltransferase, ec:1.2.1.3 - dehydrogenase (NAD+), ec:3.1.1.23 - lipase, ec:2.3.1.51 - O-acyltransferase, ec:3.1.1.26 - galactolipid lipase, ec:3.1.3.4 - phosphatase, ec:1.1.1.2 - dehydrogenase (NADP+), ec:3.1.1.3 - lipase, ec:2.3.1.15 - 1-O-acyltransferase, ec:3.2.1.22 - melibiase, ec:2.7.1.107 - kinase (ATP)	3, 15, 4, 4, 3, 2, 2, 5, 2, 5, 8	TR69349|c0_g1_i2, scaffold11221, Mj_1_GCCAAT_L005_R1_001_(paired)_trimmed_(paired)_contig_21309, TR59948|c0_g1_i5, TR56938|c0_g1_i2, TR56938|c0_g1_i1, TR75637|c1_g1_i2, scaffold12730, TR68176|c3_g1_i5, TR68176|c3_g1_i4, TR68176|c3_g1_i3, TR68176|c3_g1_i2, TR68176|c3_g1_i1, Mj_1_GCCAAT_L005_R1_001_(paired)_trimmed_(paired)_contig_5182, TR59948|c0_g1_i4, TR59948|c0_g1_i3, TR59948|c0_g1_i2, TR59948|…	11	39	28.2051
Styrene degradation	map00643	ec:3.5.1.4 - acylamidase, ec:4.2.1.84 - hydratase, ec:3.5.5.1 - acetonitrilase, ec:3.7.1.2 - beta-diketonase, ec:5.2.1.2 - isomerase	7, 4, 1, 2, 5	TR79428|c2_g2_i2, Mj_1_GCCAAT_L005_R1_001_(paired)_trimmed_(paired)_contig_4447, TR79428|c2_g1_i4, TR79428|c2_g2_i5, TR79443|c1_g5_i6, TR79428|c2_g2_i3, TR79443|c1_g5_i1, TR70720|c2_g1_i1, TR70720|c2_g1_i2, TR71437|c0_g1_i7, TR71437|c0_g1_i9, TR70893|c0_g1_i1, TR57296|c0_g1_i1, TR57296|c0_g1_i2, TR70924|c0_g1_i2, TR68696|c2_g2_i4, TR68696|c2_g2_i2, TR72373|c0_g2_i2, TR72373|c0_g2_i1	5	18	27.7778
Tropane, piperidine and pyridine alkaloid biosynthesis	map00960	ec:2.6.1.1 - transaminase, ec:2.6.1.57 - transaminase, ec:2.6.1.9 - transaminase, ec:1.4.3.21 - oxidase, ec:2.6.1.5 - transaminase, ec:1.1.1.206 - reductase I, ec:1.1.1.236 - reductase II	2, 2, 1, 3, 1, 5, 1	TR45804|c0_g1_i1, TR71621|c0_g2_i2, TR45804|c0_g1_i1, TR71621|c0_g2_i2, TR71621|c0_g2_i2, TR66763|c0_g1_i2, TR59746|c0_g1_i4, TR65335|c0_g1_i2, TR71621|c0_g2_i2, TR71294|c2_g1_i6, Mj_1_GCCAAT_L005_R1_001_(paired)_trimmed_(paired)_contig_31943, TR71294|c2_g1_i5, TR71294|c1_g1_i5, TR71294|c2_g1_i4, Mj_1_GCCAAT_L005_R1_001_(paired)_trimmed_(paired)_contig_31943	7	27	25.9259
Cutin, suberine and wax biosynthesis	map00073	ec:2.3.1.20 - O-acyltransferase, ec:1.2.1.50 - acyl-protein thioester reductase	3, 2	TR69349|c0_g1_i2, scaffold11221, Mj_1_GCCAAT_L005_R1_001_(paired)_trimmed_(paired)_contig_21309, TR76059|c2_g1_i4, TR76261|c1_g2_i4	2	8	25
Cyanoamino acid metabolism	map00460	ec:1.14.14.37 - oxime monooxygenase, ec:4.2.1.65 - hydratase, ec:3.5.5.1 - acetonitrilase, ec:3.2.1.21 - gentiobiase, ec:4.4.1.9 - synthase, ec:2.3.2.2 - glutamyl transpeptidase, ec:3.5.5.4 - nitrilase	17, 5, 1, 13, 1, 1, 5	Mj_1_GCCAAT_L005_R1_001_(paired)_trimmed_(paired)_contig_16424, Mj_1_GCCAAT_L005_R1_001_(paired)_trimmed_(paired)_contig_11121, Mj_1_GCCAAT_L005_R1_001_(paired)_trimmed_(paired)_contig_15662, Mj_1_GCCAAT_L005_R1_001_(paired)_trimmed_(paired)_contig_90399, Mj_1_GCCAAT_L005_R1_001_(paired)_trimmed_(paired)_contig_71038, C935412, TR67116|c1_g1_i3, TR67116|c1_g2_i3, TR67116|c1_g1_i1, TR67116|c1_g2_i2…	7	29	24.1379
Fatty acid degradation	map00071	ec:1.2.1.3 - dehydrogenase (NAD+), ec:1.1.1.1 - dehydrogenase, ec:6.2.1.20 - ligase, ec:4.2.1.17 - hydratase, ec:6.2.1.3 - ligase, ec:1.3.3.6 - oxidase, ec:1.14.14.1 - monooxygenase	15, 5, 1, 1, 3, 2, 6	TR59948|c0_g1_i5, TR56938|c0_g1_i2, TR56938|c0_g1_i1, TR75637|c1_g1_i2, scaffold12730, TR68176|c3_g1_i5, TR68176|c3_g1_i4, TR68176|c3_g1_i3, TR68176|c3_g1_i2, TR68176|c3_g1_i1, Mj_1_GCCAAT_L005_R1_001_(paired)_trimmed_(paired)_contig_5182, TR59948|c0_g1_i4, TR59948|c0_g1_i3, TR59948|c0_g1_i2, TR59948|c0_g1_i1, TR71294|c2_g1_i6, Mj_1_GCCAAT_L005_R1_001_(paired)_trimmed_(paired)_contig_31943, TR712…	7	29	24.1379
Glutathione metabolism	map00480	ec:3.4.19.13 - gamma-glutamate hydrolase, ec:1.11.1.12 - glutathione peroxidase, ec:1.1.1.44 - dehydrogenase (NADP+-dependent, decarboxylating), ec:1.11.1.9 - peroxidase, ec:6.3.2.2 - ligase, ec:2.5.1.18 - transferase, ec:2.3.2.2 - glutamyl transpeptidase, ec:1.1.1.42 - dehydrogenase (NADP+), ec:1.8.1.7 - reductase	1, 2, 4, 5, 1, 14, 1, 2, 1	TR72026|c0_g1_i2, Mj_1_GCCAAT_L005_R1_001_(paired)_trimmed_(paired)_contig_583, TR59902|c0_g1_i1, TR78722|c0_g1_i1, Mj_1_GCCAAT_L005_R1_001_(paired)_trimmed_(paired)_contig_17908, TR78695|c0_g2_i2, TR78722|c0_g1_i3, Mj_1_GCCAAT_L005_R1_001_(paired)_trimmed_(paired)_contig_583, TR31846|c0_g1_i1, TR34370|c0_g1_i1, TR59902|c0_g1_i1, scaffold12545, TR68369|c0_g1_i1, TR75504|c0_g7_i1, TR55090|c0_g1_i1…	9	38	23.6842
Linoleic acid metabolism	map00591	ec:1.13.11.12 - 13S-lipoxygenase, ec:3.1.1.4 - A2, ec:1.14.14.1 - monooxygenase	3, 3, 6	Mj_1_GCCAAT_L005_R1_001_(paired)_trimmed_(paired)_contig_22126, TR79365|c0_g1_i6, TR79586|c0_g1_i14, TR60374|c0_g2_i4, TR58154|c0_g3_i4, TR58154|c0_g3_i3, TR58680|c0_g1_i2, TR65080|c0_g1_i1, TR72975|c2_g3_i3, Mj_1_GCCAAT_L005_R1_001_(paired)_trimmed_(paired)_contig_17769, TR52714|c0_g1_i3, TR44142|c0_g1_i1	3	13	23.0769
Sphingolipid metabolism	map00600	ec:3.5.1.23 - acylsphingosine deacylase, ec:3.2.1.45 - psychosine hydrolase, ec:3.1.3.4 - phosphatase, ec:1.1.1.102 - reductase, ec:3.2.1.23 - lactase (ambiguous), ec:3.2.1.22 - melibiase	3, 3, 2, 1, 2, 5	TR78010|c0_g1_i1, scaffold1051, Mj_1_GCCAAT_L005_R1_001_(paired)_trimmed_(paired)_contig_13333, TR51456|c0_g1_i1, Mj_1_GCCAAT_L005_R1_001_(paired)_trimmed_(paired)_contig_4875, TR61348|c0_g1_i1, TR58716|c0_g1_i1, TR78246|c0_g2_i2, Mj_1_GCCAAT_L005_R1_001_(paired)_trimmed_(paired)_contig_14171, TR74361|c0_g1_i2, TR74361|c0_g1_i3, TR66260|c0_g1_i2, Mj_1_GCCAAT_L005_R1_001_(paired)_trimmed_(paired)_…	6	27	22.2222
Carbon fixation in photosynthetic organisms	map00710	ec:4.1.1.49 - carboxykinase (ATP), ec:2.6.1.1 - transaminase, ec:1.1.1.40 - dehydrogenase (oxaloacetate-decarboxylating) (NADP+), ec:4.1.2.13 - aldolase, ec:1.1.1.39 - dehydrogenase (decarboxylating)	1, 2, 2, 1, 2	TR73014|c3_g2_i8, TR45804|c0_g1_i1, TR71621|c0_g2_i2, Mj_1_GCCAAT_L005_R1_001_(paired)_trimmed_(paired)_contig_1514, TR70205|c1_g1_i1, TR78695|c0_g2_i2, Mj_1_GCCAAT_L005_R1_001_(paired)_trimmed_(paired)_contig_1514, TR70205|c1_g1_i1	5	25	20
Tyrosine metabolism	map00350	ec:4.1.1.68 - decarboxylase, ec:2.6.1.1 - transaminase, ec:2.1.1.6 - O-methyltransferase, ec:2.6.1.57 - transaminase, ec:2.6.1.9 - transaminase, ec:3.7.1.2 - beta-diketonase, ec:1.2.1.5 - dehydrogenase [NAD(P)+], ec:1.1.1.1 - dehydrogenase, ec:1.4.3.21 - oxidase, ec:5.2.1.2 - isomerase, ec:2.6.1.5 - transaminase, ec:1.2.1.16 - dehydrogenase [NAD(P)+]	1, 2, 1, 2, 1, 2, 15, 5, 3, 5, 1, 1	TR66217|c0_g1_i1, TR45804|c0_g1_i1, TR71621|c0_g2_i2, TR73260|c0_g2_i1, TR45804|c0_g1_i1, TR71621|c0_g2_i2, TR71621|c0_g2_i2, TR57296|c0_g1_i1, TR57296|c0_g1_i2, TR60538|c0_g1_i4, TR59948|c0_g1_i5, C964792, TR56938|c0_g1_i2, TR56938|c0_g1_i1, TR68176|c3_g1_i5, TR68176|c3_g1_i4, TR68176|c3_g1_i3, TR68176|c3_g1_i2, TR68176|c3_g1_i1, Mj_1_GCCAAT_L005_R1_001_(paired)_trimmed_(paired)_contig_5182, TR5…	12	61	19.6721
Valine, leucine and isoleucine degradation	map00280	ec:1.2.1.3 - dehydrogenase (NAD+), ec:1.2.1.27 - dehydrogenase (CoA-acylating), ec:6.4.1.4 - carboxylase, ec:2.6.1.42 - transaminase, ec:4.2.1.17 - hydratase, ec:1.2.4.4 - dehydrogenase (2-methylpropanoyl-transferring), ec:1.1.1.31 - dehydrogenase	15, 4, 1, 3, 1, 2, 4	TR59948|c0_g1_i5, TR56938|c0_g1_i2, TR56938|c0_g1_i1, TR75637|c1_g1_i2, scaffold12730, TR68176|c3_g1_i5, TR68176|c3_g1_i4, TR68176|c3_g1_i3, TR68176|c3_g1_i2, TR68176|c3_g1_i1, Mj_1_GCCAAT_L005_R1_001_(paired)_trimmed_(paired)_contig_5182, TR59948|c0_g1_i4, TR59948|c0_g1_i3, TR59948|c0_g1_i2, TR59948|c0_g1_i1, TR75546|c0_g1_i2, TR75546|c0_g1_i1, Mj_1_GCCAAT_L005_R1_001_(paired)_trimmed_(paired)_c…	7	36	19.4444
Chloroalkane and chloroalkene degradation	map00625	ec:1.2.1.3 - dehydrogenase (NAD+), ec:1.1.1.1 - dehydrogenase, ec:3.3.2.10 - epoxide hydrolase	15, 5, 1	TR59948|c0_g1_i5, TR56938|c0_g1_i2, TR56938|c0_g1_i1, TR75637|c1_g1_i2, scaffold12730, TR68176|c3_g1_i5, TR68176|c3_g1_i4, TR68176|c3_g1_i3, TR68176|c3_g1_i2, TR68176|c3_g1_i1, Mj_1_GCCAAT_L005_R1_001_(paired)_trimmed_(paired)_contig_5182, TR59948|c0_g1_i4, TR59948|c0_g1_i3, TR59948|c0_g1_i2, TR59948|c0_g1_i1, TR71294|c2_g1_i6, Mj_1_GCCAAT_L005_R1_001_(paired)_trimmed_(paired)_contig_31943, TR712…	3	16	18.75
Galactose metabolism	map00052	ec:2.4.1.67 - galactosyltransferase, ec:2.4.1.82 - galactosyltransferase, ec:3.2.1.20 - maltase, ec:2.7.1.6 - galactokinase (phosphorylating), ec:2.4.1.123 - 3-alpha-galactosyltransferase, ec:2.7.1.2 - glucokinase (phosphorylating), ec:3.2.1.23 - lactase (ambiguous), ec:3.2.1.22 - melibiase, ec:2.7.1.11 - phosphohexokinase	2, 2, 3, 5, 1, 1, 2, 5, 2	Mj_1_GCCAAT_L005_R1_001_(paired)_trimmed_(paired)_contig_7576, TR76418|c0_g2_i7, Mj_1_GCCAAT_L005_R1_001_(paired)_trimmed_(paired)_contig_7576, TR76418|c0_g2_i7, TR75132|c0_g1_i2, TR73921|c0_g1_i4, Mj_1_GCCAAT_L005_R1_001_(paired)_trimmed_(paired)_contig_4068, Mj_1_GCCAAT_L005_R1_001_(paired)_trimmed_(paired)_contig_7593, TR76165|c2_g1_i3, TR75777|c0_g2_i5, TR68958|c0_g1_i5, TR68958|c0_g1_i4, TR7…	9	48	18.75
Glycosaminoglycan biosynthesis - heparan sulfate / heparin	map00534	ec:2.4.1.224 - 4-alpha-N-acetylglucosaminyltransferase, ec:2.4.1.134 - 3-beta-galactosyltransferase	1, 3	TR68709|c0_g1_i2, TR67233|c0_g1_i3, Mj_1_GCCAAT_L005_R1_001_(paired)_trimmed_(paired)_contig_11998, TR69769|c1_g1_i11	2	11	18.1818
Oxidative phosphorylation	map00190	ec:3.6.1.1 - diphosphatase, ec:1.3.5.1 - dehydrogenase	1, 1	TR67768|c2_g2_i5, TR62745|c0_g1_i3	2	11	18.1818
Phenylalanine metabolism	map00360	ec:3.5.1.4 - acylamidase, ec:2.6.1.1 - transaminase, ec:2.6.1.21 - transaminase, ec:2.6.1.57 - transaminase, ec:2.6.1.9 - transaminase, ec:1.2.1.5 - dehydrogenase [NAD(P)+], ec:4.2.1.17 - hydratase, ec:1.4.3.21 - oxidase, ec:2.6.1.5 - transaminase, ec:4.3.1.24 - ammonia-lyase, ec:3.5.1.32 - hydrolase, ec:4.3.1.25 - ammonia-lyase	7, 2, 5, 2, 1, 15, 1, 3, 1, 1, 3, 1	TR79428|c2_g2_i2, Mj_1_GCCAAT_L005_R1_001_(paired)_trimmed_(paired)_contig_4447, TR79428|c2_g1_i4, TR79428|c2_g2_i5, TR79443|c1_g5_i6, TR79428|c2_g2_i3, TR79443|c1_g5_i1, TR45804|c0_g1_i1, TR71621|c0_g2_i2, TR59535|c0_g1_i3, TR63552|c0_g2_i3, Mj_1_GCCAAT_L005_R1_001_(paired)_trimmed_(paired)_contig_2688, TR59535|c0_g1_i2, TR63552|c0_g2_i4, TR45804|c0_g1_i1, TR71621|c0_g2_i2, TR71621|c0_g2_i2, TR6…	12	66	18.1818
Terpenoid backbone biosynthesis	map00900	ec:1.1.1.34 - reductase (NADPH), ec:1.1.1.267 - reductoisomerase, ec:2.5.1.10 - diphosphate synthase, ec:2.2.1.7 - synthase, ec:2.5.1.1 - geranyl-diphosphate synthase, ec:5.3.3.2 - Delta-isomerase, ec:2.5.1.29 - diphosphate synthase, ec:2.5.1.58 - farnesyltransferase, ec:1.1.1.88 - reductase	3, 1, 1, 3, 2, 3, 5, 2, 2	Mj_1_GCCAAT_L005_R1_001_(paired)_trimmed_(paired)_contig_2738, scaffold14447, TR58234|c0_g1_i1, TR59927|c0_g1_i1, TR55951|c0_g1_i1, TR68725|c0_g1_i1, TR49914|c0_g1_i2, TR68725|c1_g1_i1, TR62574|c1_g1_i1, TR55951|c0_g1_i1, TR67228|c0_g2_i2, TR68773|c2_g1_i1, scaffold13234, TR53653|c0_g1_i2, TR55951|c0_g1_i1, TR57071|c0_g1_i2, TR62574|c1_g1_i1, TR57071|c0_g1_i3, TR57071|c0_g1_i2, TR57071|c0_g1_i3, …	9	50	18
Arginine biosynthesis	map00220	ec:3.5.1.14 - acid amidohydrolase, ec:2.6.1.1 - transaminase, ec:2.6.1.11 - transaminase, ec:3.5.1.16 - deacetylase, ec:1.4.1.4 - dehydrogenase (NADP+)	1, 2, 3, 2, 1	TR70227|c0_g1_i1, TR45804|c0_g1_i1, TR71621|c0_g2_i2, TR77047|c1_g1_i1, TR60569|c0_g1_i1, Mj_1_GCCAAT_L005_R1_001_(paired)_trimmed_(paired)_contig_9219, TR58579|c0_g2_i3, scaffold10614, TR76379|c0_g3_i8	5	28	17.8571
Caffeine metabolism	map00232	ec:2.3.1.5 - N-acetyltransferase, ec:1.14.14.1 - monooxygenase	3, 6	Mj_1_GCCAAT_L005_R1_001_(paired)_trimmed_(paired)_contig_18327, TR63904|c1_g1_i2, TR64827|c0_g1_i1, TR58680|c0_g1_i2, TR65080|c0_g1_i1, TR72975|c2_g3_i3, Mj_1_GCCAAT_L005_R1_001_(paired)_trimmed_(paired)_contig_17769, TR52714|c0_g1_i3, TR44142|c0_g1_i1	2	12	16.6667
D-Alanine metabolism	map00473	ec:2.6.1.21 - transaminase	5	TR59535|c0_g1_i3, TR63552|c0_g2_i3, Mj_1_GCCAAT_L005_R1_001_(paired)_trimmed_(paired)_contig_2688, TR59535|c0_g1_i2, TR63552|c0_g2_i4	1	6	16.6667
Selenocompound metabolism	map00450	ec:2.1.1.14 - S-methyltransferase, ec:6.1.1.10 - ligase, ec:2.1.1.13 - synthase	1, 1, 1	C969084, TR74261|c0_g1_i1, C969084	3	18	16.6667
Stilbenoid, diarylheptanoid and gingerol biosynthesis	map00945	ec:1.14.14.91 - 4-monooxygenase, ec:2.1.1.104 - O-methyltransferase	2, 1	Mj_1_GCCAAT_L005_R1_001_(paired)_trimmed_(paired)_contig_253, TR67234|c1_g2_i2, TR60203|c0_g1_i2	2	12	16.6667
Thiamine metabolism	map00730	ec:3.6.1.15 - phosphatase, ec:3.1.3.2 - phosphatase, ec:2.2.1.7 - synthase, ec:2.7.6.2 - diphosphokinase	13, 6, 3, 1	Mj_1_GCCAAT_L005_R1_001_(paired)_trimmed_(paired)_contig_14124, TR61056|c0_g3_i1, TR64114|c0_g2_i2, TR64114|c0_g1_i3, TR64114|c0_g1_i2, TR64114|c0_g2_i3, Mj_1_GCCAAT_L005_R1_001_(paired)_trimmed_(paired)_contig_30814, TR57298|c1_g1_i3, Mj_1_GCCAAT_L005_R1_001_(paired)_trimmed_(paired)_contig_25405, Mj_1_GCCAAT_L005_R1_001_(paired)_trimmed_(paired)_contig_325, TR64259|c0_g1_i3, TR62297|c0_g2_i2, T…	4	24	16.6667
Pyruvate metabolism	map00620	ec:1.2.1.3 - dehydrogenase (NAD+), ec:4.1.1.49 - carboxykinase (ATP), ec:4.2.1.130 - dehydratase, ec:2.3.1.12 - acetyltransferase, ec:6.2.1.1 - ligase, ec:4.1.1.112 - decarboxylase, ec:1.1.1.40 - dehydrogenase (oxaloacetate-decarboxylating) (NADP+), ec:1.1.1.38 - dehydrogenase (oxaloacetate-decarboxylating), ec:4.4.1.5 - lyase, ec:1.1.1.39 - dehydrogenase (decarboxylating), ec:2.7.1.40 - kinase	15, 1, 1, 1, 3, 1, 2, 2, 24, 2, 3	TR59948|c0_g1_i5, TR56938|c0_g1_i2, TR56938|c0_g1_i1, TR75637|c1_g1_i2, scaffold12730, TR68176|c3_g1_i5, TR68176|c3_g1_i4, TR68176|c3_g1_i3, TR68176|c3_g1_i2, TR68176|c3_g1_i1, Mj_1_GCCAAT_L005_R1_001_(paired)_trimmed_(paired)_contig_5182, TR59948|c0_g1_i4, TR59948|c0_g1_i3, TR59948|c0_g1_i2, TR59948|c0_g1_i1, TR73014|c3_g2_i8, TR68544|c0_g2_i3, Mj_1_GCCAAT_L005_R1_001_(paired)_trimmed_(paired)_c…	11	67	16.4179
beta-Alanine metabolism	map00410	ec:1.2.1.3 - dehydrogenase (NAD+), ec:3.5.2.2 - hydantoinase, ec:1.2.1.5 - dehydrogenase [NAD(P)+], ec:4.2.1.17 - hydratase, ec:1.4.3.21 - oxidase, ec:1.3.3.6 - oxidase	15, 7, 15, 1, 3, 2	TR59948|c0_g1_i5, TR56938|c0_g1_i2, TR56938|c0_g1_i1, TR75637|c1_g1_i2, scaffold12730, TR68176|c3_g1_i5, TR68176|c3_g1_i4, TR68176|c3_g1_i3, TR68176|c3_g1_i2, TR68176|c3_g1_i1, Mj_1_GCCAAT_L005_R1_001_(paired)_trimmed_(paired)_contig_5182, TR59948|c0_g1_i4, TR59948|c0_g1_i3, TR59948|c0_g1_i2, TR59948|c0_g1_i1, TR69841|c1_g1_i4, TR69841|c1_g1_i3, TR69841|c1_g1_i2, TR69841|c1_g1_i5, TR70632|c0_g1_i…	6	37	16.2162
Aminoacyl-tRNA biosynthesis	map00970	ec:6.1.1.7 - ligase, ec:6.1.1.14 - ligase, ec:6.1.1.4 - ligase, ec:6.1.1.20 - ligase, ec:6.1.1.10 - ligase	1, 2, 1, 2, 1	TR62316|c0_g1_i2, TR67679|c0_g1_i1, Mj_1_GCCAAT_L005_R1_001_(paired)_trimmed_(paired)_contig_3697, TR76082|c3_g1_i3, TR68608|c2_g2_i2, TR68608|c2_g2_i4, TR74261|c0_g1_i1	5	31	16.129
Glycerophospholipid metabolism	map00564	ec:3.1.4.4 - D, ec:2.3.1.51 - O-acyltransferase, ec:1.1.1.94 - dehydrogenase [NAD(P)+], ec:3.1.4.46 - phosphodiesterase, ec:1.1.1.8 - dehydrogenase (NAD+), ec:3.1.3.4 - phosphatase, ec:2.3.1.15 - 1-O-acyltransferase, ec:2.7.1.107 - kinase (ATP), ec:3.1.1.4 - A2, ec:3.1.1.32 - A1	2, 4, 1, 2, 1, 2, 2, 8, 3, 2	TR75715|c0_g1_i6, TR75009|c1_g5_i7, TR74502|c1_g1_i1, TR58154|c0_g3_i4, TR58154|c0_g3_i3, TR60374|c0_g2_i4, TR62942|c1_g1_i3, TR63766|c0_g1_i2, TR64298|c1_g2_i1, TR62942|c1_g1_i3, TR58716|c0_g1_i1, TR78246|c0_g2_i2, Mj_1_GCCAAT_L005_R1_001_(paired)_trimmed_(paired)_contig_65218, TR68953|c0_g1_i1, TR60259|c0_g1_i1, TR72369|c0_g2_i9, TR54994|c0_g1_i1, TR71605|c0_g1_i2, TR71605|c0_g1_i1, TR72369|c0_…	10	62	16.129
Pantothenate and CoA biosynthesis	map00770	ec:1.2.1.3 - dehydrogenase (NAD+), ec:3.5.2.2 - hydantoinase, ec:3.6.1.9 - diphosphatase, ec:2.7.1.33 - kinase, ec:2.6.1.42 - transaminase	15, 7, 3, 4, 3	TR59948|c0_g1_i5, TR56938|c0_g1_i2, TR56938|c0_g1_i1, TR75637|c1_g1_i2, scaffold12730, TR68176|c3_g1_i5, TR68176|c3_g1_i4, TR68176|c3_g1_i3, TR68176|c3_g1_i2, TR68176|c3_g1_i1, Mj_1_GCCAAT_L005_R1_001_(paired)_trimmed_(paired)_contig_5182, TR59948|c0_g1_i4, TR59948|c0_g1_i3, TR59948|c0_g1_i2, TR59948|c0_g1_i1, TR69841|c1_g1_i4, TR69841|c1_g1_i3, TR69841|c1_g1_i2, TR69841|c1_g1_i5, TR70632|c0_g1_i…	5	31	16.129
Citrate cycle (TCA cycle)	map00020	ec:1.3.5.1 - dehydrogenase, ec:4.1.1.49 - carboxykinase (ATP), ec:2.3.1.12 - acetyltransferase, ec:1.1.1.42 - dehydrogenase (NADP+)	1, 1, 1, 2	TR62745|c0_g1_i3, TR73014|c3_g2_i8, Mj_1_GCCAAT_L005_R1_001_(paired)_trimmed_(paired)_contig_893, Mj_1_GCCAAT_L005_R1_001_(paired)_trimmed_(paired)_contig_25315, TR67941|c0_g2_i4	4	25	16
Cysteine and methionine metabolism	map00270	ec:2.1.1.14 - S-methyltransferase, ec:2.6.1.1 - transaminase, ec:6.3.2.2 - ligase, ec:2.6.1.57 - transaminase, ec:2.7.2.4 - kinase, ec:2.6.1.42 - transaminase, ec:4.4.1.15 - desulfhydrase, ec:2.5.1.47 - synthase, ec:2.5.1.6 - adenosyltransferase, ec:2.6.1.5 - transaminase, ec:3.5.99.7 - deaminase, ec:2.1.1.13 - synthase	1, 2, 1, 2, 1, 3, 1, 1, 1, 1, 1, 1	C969084, TR45804|c0_g1_i1, TR71621|c0_g2_i2, TR68369|c0_g1_i1, TR45804|c0_g1_i1, TR71621|c0_g2_i2, TR72784|c0_g1_i1, TR66293|c1_g3_i1, TR77453|c0_g1_i4, TR61084|c0_g2_i2, TR69351|c0_g1_i4, TR56390|c0_g1_i2, Mj_1_GCCAAT_L005_R1_001_(paired)_trimmed_(paired)_contig_7411, TR71621|c0_g2_i2, TR69351|c0_g1_i4, C969084	12	76	15.7895
Indole alkaloid biosynthesis	map00901	ec:3.1.1.78 - esterase, ec:1.14.11.20 - 4-hydroxylase, ec:4.3.3.2 - synthase	2, 4, 6	TR72927|c1_g1_i3, TR72927|c1_g1_i8, C956084, TR52351|c0_g1_i1, TR76125|c3_g1_i7, TR57354|c0_g1_i1, Mj_1_GCCAAT_L005_R1_001_(paired)_trimmed_(paired)_contig_16236, TR65387|c0_g1_i5, TR73512|c0_g2_i1, TR55491|c0_g1_i2, TR77506|c0_g1_i1, Mj_1_GCCAAT_L005_R1_001_(paired)_trimmed_(paired)_contig_11720	3	19	15.7895
Arachidonic acid metabolism	map00590	ec:1.11.1.9 - peroxidase, ec:3.3.2.10 - epoxide hydrolase, ec:3.1.1.4 - A2, ec:1.14.14.1 - monooxygenase	5, 1, 3, 6	Mj_1_GCCAAT_L005_R1_001_(paired)_trimmed_(paired)_contig_583, TR31846|c0_g1_i1, TR34370|c0_g1_i1, TR59902|c0_g1_i1, scaffold12545, Mj_1_GCCAAT_L005_R1_001_(paired)_trimmed_(paired)_contig_46686, TR60374|c0_g2_i4, TR58154|c0_g3_i4, TR58154|c0_g3_i3, TR58680|c0_g1_i2, TR65080|c0_g1_i1, TR72975|c2_g3_i3, Mj_1_GCCAAT_L005_R1_001_(paired)_trimmed_(paired)_contig_17769, TR52714|c0_g1_i3, TR44142|c0_g1_…	4	26	15.3846
Fatty acid elongation	map00062	ec:4.2.1.17 - hydratase, ec:3.1.2.22 - hydrolase	1, 1	TR79248|c2_g3_i3, TR74417|c0_g3_i5	2	13	15.3846
Biotin metabolism	map00780	ec:1.1.1.100 - reductase, ec:2.3.1.47 - synthase, ec:2.8.1.6 - synthase	3, 2, 1	TR54499|c0_g1_i2, Mj_1_GCCAAT_L005_R1_001_(paired)_trimmed_(paired)_contig_49285, TR61240|c1_g1_i1, Mj_1_GCCAAT_L005_R1_001_(paired)_trimmed_(paired)_contig_17605, C965112, Mj_1_GCCAAT_L005_R1_001_(paired)_trimmed_(paired)_contig_13322	3	20	15
Riboflavin metabolism	map00740	ec:3.5.4.25 - cyclohydrolase II, ec:3.6.1.9 - diphosphatase, ec:3.1.3.2 - phosphatase, ec:4.1.99.12 - synthase	1, 3, 6, 1	Mj_1_GCCAAT_L005_R1_001_(paired)_trimmed_(paired)_contig_9011, Mj_1_GCCAAT_L005_R1_001_(paired)_trimmed_(paired)_contig_32402, TR53307|c0_g1_i3, TR53307|c0_g1_i5, C971910, TR64812|c0_g1_i11, TR78246|c0_g2_i2, TR55597|c0_g1_i1, TR54724|c0_g1_i2, Mj_1_GCCAAT_L005_R1_001_(paired)_trimmed_(paired)_contig_25033, Mj_1_GCCAAT_L005_R1_001_(paired)_trimmed_(paired)_contig_9011	4	28	14.2857
Starch and sucrose metabolism	map00500	ec:3.2.1.4 - endo-1,4-beta-D-glucanase, ec:5.3.1.9 - isomerase, ec:3.6.1.9 - diphosphatase, ec:3.2.1.20 - maltase, ec:3.2.1.21 - gentiobiase, ec:3.2.1.1 - glycogenase, ec:2.7.1.2 - glucokinase (phosphorylating), ec:3.1.3.12 - trehalose 6-phosphatase, ec:2.4.1.21 - synthase (glycosyl-transferring), ec:3.2.1.39 - endo-1,3-beta-D-glucosidase, ec:2.4.1.12 - synthase (UDP-forming)	2, 1, 3, 3, 13, 1, 1, 1, 1, 4, 3	TR61095|c0_g1_i2, TR63164|c0_g1_i1, TR51557|c0_g1_i1, Mj_1_GCCAAT_L005_R1_001_(paired)_trimmed_(paired)_contig_32402, TR53307|c0_g1_i3, TR53307|c0_g1_i5, TR75132|c0_g1_i2, TR73921|c0_g1_i4, Mj_1_GCCAAT_L005_R1_001_(paired)_trimmed_(paired)_contig_4068, TR61095|c0_g1_i2, TR67210|c0_g1_i2, TR75912|c1_g2_i2, TR78921|c1_g1_i1, scaffold12573, Mj_1_GCCAAT_L005_R1_001_(paired)_trimmed_(paired)_contig_86…	11	77	14.2857
Alanine, aspartate and glutamate metabolism	map00250	ec:2.6.1.16 - transaminase (isomerizing), ec:2.6.1.1 - transaminase, ec:2.6.1.96 - transaminase, ec:6.3.4.4 - synthase, ec:1.2.1.24 - dehydrogenase (NAD+), ec:1.2.1.16 - dehydrogenase [NAD(P)+], ec:1.4.1.4 - dehydrogenase (NADP+)	1, 2, 2, 1, 1, 1, 1	TR72638|c1_g3_i1, TR45804|c0_g1_i1, TR71621|c0_g2_i2, TR60569|c0_g1_i1, Mj_1_GCCAAT_L005_R1_001_(paired)_trimmed_(paired)_contig_9219, TR76616|c0_g2_i1, TR60538|c0_g1_i4, TR60538|c0_g1_i4, TR76379|c0_g3_i8	7	50	14
Steroid hormone biosynthesis	map00140	ec:2.1.1.6 - O-methyltransferase, ec:1.1.1.145 - dehydrogenase, ec:1.3.1.3 - 5beta-reductase, ec:1.3.99.6 - 4-dehydrogenase, ec:1.14.14.1 - monooxygenase	1, 8, 2, 1, 6	TR73260|c0_g2_i1, TR69323|c0_g1_i3, TR75507|c0_g1_i2, TR67307|c0_g1_i1, TR77258|c5_g1_i4, Mj_1_GCCAAT_L005_R1_001_(paired)_trimmed_(paired)_contig_23432, TR52651|c0_g1_i1, TR52651|c0_g1_i2, TR52651|c0_g1_i3, TR67307|c0_g1_i1, Mj_1_GCCAAT_L005_R1_001_(paired)_trimmed_(paired)_contig_23432, Mj_1_GCCAAT_L005_R1_001_(paired)_trimmed_(paired)_contig_23432, TR58680|c0_g1_i2, TR65080|c0_g1_i1, TR72975|c…	5	36	13.8889
Tryptophan metabolism	map00380	ec:3.5.1.9 - kynurenine formamidase, ec:3.5.1.4 - acylamidase, ec:1.2.1.3 - dehydrogenase (NAD+), ec:4.2.1.84 - hydratase, ec:3.5.5.1 - acetonitrilase, ec:4.2.1.17 - hydratase, ec:1.4.3.22 - oxidase, ec:1.14.14.1 - monooxygenase	2, 7, 15, 4, 1, 1, 2, 6	TR65307|c0_g1_i4, TR68123|c0_g2_i3, TR79428|c2_g2_i2, Mj_1_GCCAAT_L005_R1_001_(paired)_trimmed_(paired)_contig_4447, TR79428|c2_g1_i4, TR79428|c2_g2_i5, TR79443|c1_g5_i6, TR79428|c2_g2_i3, TR79443|c1_g5_i1, TR59948|c0_g1_i5, TR56938|c0_g1_i2, TR56938|c0_g1_i1, TR75637|c1_g1_i2, scaffold12730, TR68176|c3_g1_i5, TR68176|c3_g1_i4, TR68176|c3_g1_i3, TR68176|c3_g1_i2, TR68176|c3_g1_i1, Mj_1_GCCAAT_L00…	8	58	13.7931
Ether lipid metabolism	map00565	ec:3.1.4.4 - D, ec:3.1.3.4 - phosphatase, ec:3.1.1.4 - A2	2, 2, 3	TR75715|c0_g1_i6, TR75009|c1_g5_i7, TR58716|c0_g1_i1, TR78246|c0_g2_i2, TR60374|c0_g2_i4, TR58154|c0_g3_i4, TR58154|c0_g3_i3	3	23	13.0435
Isoquinoline alkaloid biosynthesis	map00950	ec:1.1.1.247 - reductase (NADPH), ec:2.6.1.1 - transaminase, ec:1.14.14.102 - 3'-monooxygenase, ec:2.6.1.57 - transaminase, ec:1.4.3.21 - oxidase, ec:2.6.1.5 - transaminase, ec:1.21.3.3 - oxidase	1, 2, 1, 2, 3, 1, 1	TR62888|c0_g1_i1, TR45804|c0_g1_i1, TR71621|c0_g2_i2, Mj_1_GCCAAT_L005_R1_001_(paired)_trimmed_(paired)_contig_45767, TR45804|c0_g1_i1, TR71621|c0_g2_i2, TR66763|c0_g1_i2, TR59746|c0_g1_i4, TR65335|c0_g1_i2, TR71621|c0_g2_i2, Mj_1_GCCAAT_L005_R1_001_(paired)_trimmed_(paired)_contig_22136	7	55	12.7273
Anthocyanin biosynthesis	map00942	ec:2.3.1.153 - 5-(6'''-hydroxycinnamoyltransferase), ec:2.4.1.115 - 3-O-glucosyltransferase	1, 13	TR73354|c1_g1_i2, TR77163|c0_g3_i1, TR51600|c0_g1_i4, TR37443|c1_g2_i1, TR73115|c0_g1_i4, TR64475|c0_g1_i4, TR71552|c0_g1_i1, Mj_1_GCCAAT_L005_R1_001_(paired)_trimmed_(paired)_contig_20483, Mj_1_GCCAAT_L005_R1_001_(paired)_trimmed_(paired)_contig_30826, TR77672|c0_g3_i1, TR77469|c1_g2_i3, TR70221|c1_g1_i1, TR53864|c0_g1_i1, TR60735|c1_g2_i1	2	16	12.5
Biosynthesis of unsaturated fatty acids	map01040	ec:1.14.19.2 - 9-desaturase, ec:1.3.3.6 - oxidase	3, 2	Mj_1_GCCAAT_L005_R1_001_(paired)_trimmed_(paired)_contig_4365, TR56689|c0_g1_i1, TR60476|c0_g4_i1, Mj_1_GCCAAT_L005_R1_001_(paired)_trimmed_(paired)_contig_19507, TR76880|c0_g1_i2	2	16	12.5
Glycosphingolipid biosynthesis - ganglio series	map00604	ec:3.2.1.23 - lactase (ambiguous)	2	TR74361|c0_g1_i2, TR74361|c0_g1_i3	1	8	12.5
Limonene and pinene degradation	map00903	ec:1.2.1.3 - dehydrogenase (NAD+), ec:4.2.1.17 - hydratase	15, 1	TR59948|c0_g1_i5, TR56938|c0_g1_i2, TR56938|c0_g1_i1, TR75637|c1_g1_i2, scaffold12730, TR68176|c3_g1_i5, TR68176|c3_g1_i4, TR68176|c3_g1_i3, TR68176|c3_g1_i2, TR68176|c3_g1_i1, Mj_1_GCCAAT_L005_R1_001_(paired)_trimmed_(paired)_contig_5182, TR59948|c0_g1_i4, TR59948|c0_g1_i3, TR59948|c0_g1_i2, TR59948|c0_g1_i1, TR79248|c2_g3_i3	2	16	12.5
One carbon pool by folate	map00670	ec:3.5.4.9 - cyclohydrolase, ec:1.5.1.5 - dehydrogenase (NADP+), ec:2.1.1.13 - synthase	1, 1, 1	TR62053|c0_g1_i1, TR62053|c0_g1_i1, C969084	3	24	12.5
Ubiquinone and other terpenoid-quinone biosynthesis	map00130	ec:1.6.5.2 - dehydrogenase (quinone), ec:1.14.14.91 - 4-monooxygenase, ec:6.2.1.26 - ligase, ec:2.6.1.5 - transaminase, ec:6.2.1.12 - ligase	7, 2, 3, 1, 2	TR67384|c2_g2_i4, TR67384|c2_g2_i8, TR67384|c2_g2_i6, scaffold12055, TR67384|c2_g2_i5, TR67384|c2_g2_i9, TR72070|c1_g1_i1, Mj_1_GCCAAT_L005_R1_001_(paired)_trimmed_(paired)_contig_253, TR67234|c1_g2_i2, Mj_1_GCCAAT_L005_R1_001_(paired)_trimmed_(paired)_contig_17553, TR68001|c0_g1_i1, TR62817|c3_g2_i1, TR71621|c0_g2_i2, Mj_1_GCCAAT_L005_R1_001_(paired)_trimmed_(paired)_contig_11501, TR79058|c1_g1_…	5	40	12.5
Carbon fixation pathways in prokaryotes	map00720	ec:1.3.5.1 - dehydrogenase, ec:6.2.1.1 - ligase, ec:3.5.4.9 - cyclohydrolase, ec:1.5.1.5 - dehydrogenase (NADP+), ec:4.2.1.17 - hydratase, ec:1.1.1.42 - dehydrogenase (NADP+)	1, 3, 1, 1, 1, 2	TR62745|c0_g1_i3, Mj_1_GCCAAT_L005_R1_001_(paired)_trimmed_(paired)_contig_17553, Mj_1_GCCAAT_L005_R1_001_(paired)_trimmed_(paired)_contig_12141, TR62817|c3_g2_i1, TR62053|c0_g1_i1, TR62053|c0_g1_i1, TR79248|c2_g3_i3, Mj_1_GCCAAT_L005_R1_001_(paired)_trimmed_(paired)_contig_25315, TR67941|c0_g2_i4	6	50	12
Diterpenoid biosynthesis	map00904	ec:1.14.11.15 - 3beta-dioxygenase, ec:5.5.1.13 - diphosphate synthase, ec:2.3.1.167 - III 10-O-acetyltransferase, ec:2.3.1.162 - O-acetyltransferase, ec:4.2.3.8 - synthase, ec:4.2.3.19 - synthase	4, 1, 2, 9, 1, 1	TR75168|c1_g1_i4, TR78325|c2_g2_i2, TR10648|c0_g1_i1, TR75168|c0_g1_i1, Mj_1_GCCAAT_L005_R1_001_(paired)_trimmed_(paired)_contig_21922, Mj_1_GCCAAT_L005_R1_001_(paired)_trimmed_(paired)_contig_44923, TR75190|c0_g2_i6, Mj_1_GCCAAT_L005_R1_001_(paired)_trimmed_(paired)_contig_44923, Mj_1_GCCAAT_L005_R1_001_(paired)_trimmed_(paired)_contig_15341, TR76466|c0_g2_i2, TR76466|c0_g2_i3, TR75190|c0_g2_i1,…	6	50	12
Amino sugar and nucleotide sugar metabolism	map00520	ec:2.7.1.46 - L-arabinokinase (phosphorylating), ec:2.6.1.16 - transaminase (isomerizing), ec:5.3.1.9 - isomerase, ec:2.4.1.43 - 4-alpha-galacturonosyltransferase, ec:2.7.1.6 - galactokinase (phosphorylating), ec:1.3.1.98 - dehydrogenase, ec:2.7.1.43 - glucuronokinase (phosphorylating), ec:4.2.1.76 - 4,6-dehydratase, ec:2.7.1.2 - glucokinase (phosphorylating), ec:2.7.1.44 - galacturonokinase (pho…	1, 1, 1, 1, 5, 1, 1, 3, 1, 1, 2, 9, 1, 1	TR75777|c0_g2_i5, TR72638|c1_g3_i1, TR51557|c0_g1_i1, Mj_1_GCCAAT_L005_R1_001_(paired)_trimmed_(paired)_contig_72554, Mj_1_GCCAAT_L005_R1_001_(paired)_trimmed_(paired)_contig_7593, TR76165|c2_g1_i3, TR75777|c0_g2_i5, TR68958|c0_g1_i5, TR68958|c0_g1_i4, Mj_1_GCCAAT_L005_R1_001_(paired)_trimmed_(paired)_contig_22136, TR75777|c0_g2_i5, Mj_1_GCCAAT_L005_R1_001_(paired)_trimmed_(paired)_contig_3497, T…	14	119	11.7647
Aminobenzoate degradation	map00627	ec:3.5.1.4 - acylamidase, ec:4.2.1.84 - hydratase, ec:3.5.5.1 - acetonitrilase, ec:4.2.1.17 - hydratase, ec:3.1.3.41 - nitrophenyl phosphatase, ec:1.14.14.1 - monooxygenase	7, 4, 1, 1, 2, 6	TR79428|c2_g2_i2, Mj_1_GCCAAT_L005_R1_001_(paired)_trimmed_(paired)_contig_4447, TR79428|c2_g1_i4, TR79428|c2_g2_i5, TR79443|c1_g5_i6, TR79428|c2_g2_i3, TR79443|c1_g5_i1, TR70720|c2_g1_i1, TR70720|c2_g1_i2, TR71437|c0_g1_i7, TR71437|c0_g1_i9, TR70893|c0_g1_i1, TR79248|c2_g3_i3, TR78706|c0_g1_i6, TR78706|c0_g1_i1, TR58680|c0_g1_i2, TR65080|c0_g1_i1, TR72975|c2_g3_i3, Mj_1_GCCAAT_L005_R1_001_(paire…	6	51	11.7647
Fluorobenzoate degradation	map00364	ec:4.2.1.84 - hydratase, ec:3.1.1.45 - maleylacetate enol-lactonase	4, 6	TR70720|c2_g1_i1, TR70720|c2_g1_i2, TR71437|c0_g1_i7, TR71437|c0_g1_i9, TR68429|c0_g1_i3, TR68429|c0_g1_i4, TR64624|c0_g1_i2, TR68415|c0_g1_i1, TR70308|c0_g1_i1, TR76599|c0_g1_i1	2	18	11.1111
Isoflavonoid biosynthesis	map00943	ec:2.1.1.150 - 7-O-methyltransferase, ec:1.3.1.45 - reductase	1, 1	scaffold13906, TR50472|c0_g1_i1	2	18	11.1111
Naphthalene degradation	map00626	ec:1.1.1.1 - dehydrogenase	5	TR71294|c2_g1_i6, Mj_1_GCCAAT_L005_R1_001_(paired)_trimmed_(paired)_contig_31943, TR71294|c2_g1_i5, TR71294|c1_g1_i5, TR79055|c2_g2_i4	1	9	11.1111
Butanoate metabolism	map00650	ec:1.3.5.1 - dehydrogenase, ec:2.6.1.96 - transaminase, ec:6.2.1.2 - acyl-CoA ligase, ec:4.2.1.17 - hydratase, ec:1.2.1.24 - dehydrogenase (NAD+), ec:1.2.1.16 - dehydrogenase [NAD(P)+]	1, 2, 2, 1, 1, 1	TR62745|c0_g1_i3, TR60569|c0_g1_i1, Mj_1_GCCAAT_L005_R1_001_(paired)_trimmed_(paired)_contig_9219, Mj_1_GCCAAT_L005_R1_001_(paired)_trimmed_(paired)_contig_17553, TR62817|c3_g2_i1, TR79248|c2_g3_i3, TR60538|c0_g1_i4, TR60538|c0_g1_i4	6	55	10.9091
Pentose phosphate pathway	map00030	ec:5.3.1.9 - isomerase, ec:1.1.1.44 - dehydrogenase (NADP+-dependent, decarboxylating), ec:3.1.1.31 - phosphogluconolactonase, ec:2.7.6.1 - diphosphokinase, ec:4.1.2.13 - aldolase, ec:2.7.1.11 - phosphohexokinase	1, 4, 1, 1, 1, 2	TR51557|c0_g1_i1, TR78722|c0_g1_i1, Mj_1_GCCAAT_L005_R1_001_(paired)_trimmed_(paired)_contig_17908, TR78695|c0_g2_i2, TR78722|c0_g1_i3, TR65004|c0_g1_i3, TR60716|c0_g1_i3, TR78695|c0_g2_i2, TR75056|c1_g1_i2, scaffold1295	6	55	10.9091
Lysine biosynthesis	map00300	ec:1.5.1.10 - dehydrogenase (NADP+, L-glutamate-forming), ec:2.6.1.57 - transaminase, ec:2.7.2.4 - kinase	3, 2, 1	TR69971|c0_g1_i1, TR69404|c0_g1_i2, Mj_1_GCCAAT_L005_R1_001_(paired)_trimmed_(paired)_contig_14056, TR45804|c0_g1_i1, TR71621|c0_g2_i2, TR72784|c0_g1_i1	3	28	10.7143
Histidine metabolism	map00340	ec:1.2.1.3 - dehydrogenase (NAD+), ec:2.6.1.9 - transaminase, ec:1.2.1.5 - dehydrogenase [NAD(P)+], ec:1.4.3.22 - oxidase	15, 1, 15, 2	TR59948|c0_g1_i5, TR56938|c0_g1_i2, TR56938|c0_g1_i1, TR75637|c1_g1_i2, scaffold12730, TR68176|c3_g1_i5, TR68176|c3_g1_i4, TR68176|c3_g1_i3, TR68176|c3_g1_i2, TR68176|c3_g1_i1, Mj_1_GCCAAT_L005_R1_001_(paired)_trimmed_(paired)_contig_5182, TR59948|c0_g1_i4, TR59948|c0_g1_i3, TR59948|c0_g1_i2, TR59948|c0_g1_i1, TR71621|c0_g2_i2, TR60538|c0_g1_i4, TR59948|c0_g1_i5, C964792, TR56938|c0_g1_i2, TR5693…	4	38	10.5263
Primary bile acid biosynthesis	map00120	ec:4.2.1.107 - hydratase, ec:1.3.1.3 - 5beta-reductase	3, 2	TR68956|c0_g2_i2, TR68956|c0_g2_i3, TR68956|c0_g2_i4, TR67307|c0_g1_i1, Mj_1_GCCAAT_L005_R1_001_(paired)_trimmed_(paired)_contig_23432	2	19	10.5263
Phosphatidylinositol signaling system	map04070	ec:2.7.1.159 - 5/6-kinase, ec:3.1.3.36 - 5-phosphatase, ec:2.7.1.107 - kinase (ATP)	1, 1, 8	TR70028|c2_g1_i1, TR69812|c0_g3_i1, TR60259|c0_g1_i1, TR72369|c0_g2_i9, TR54994|c0_g1_i1, TR71605|c0_g1_i2, TR71605|c0_g1_i1, TR72369|c0_g2_i14, TR71605|c0_g1_i5, Mj_1_GCCAAT_L005_R1_001_(paired)_trimmed_(paired)_contig_7430	3	29	10.3448
Nicotinate and nicotinamide metabolism	map00760	ec:3.6.1.9 - diphosphatase, ec:2.7.1.23 - kinase, ec:3.6.1.22 - diphosphatase, ec:1.2.1.24 - dehydrogenase (NAD+), ec:3.5.1.19 - nicotinamide deaminase, ec:1.2.1.16 - dehydrogenase [NAD(P)+]	3, 6, 1, 1, 2, 1	Mj_1_GCCAAT_L005_R1_001_(paired)_trimmed_(paired)_contig_32402, TR53307|c0_g1_i3, TR53307|c0_g1_i5, TR71605|c0_g1_i5, TR74463|c1_g2_i5, TR54994|c0_g1_i1, Mj_1_GCCAAT_L005_R1_001_(paired)_trimmed_(paired)_contig_7430, TR71605|c0_g1_i1, TR72369|c0_g2_i14, Mj_1_GCCAAT_L005_R1_001_(paired)_trimmed_(paired)_contig_32402, TR60538|c0_g1_i4, TR62350|c1_g1_i3, TR68573|c1_g1_i1, TR60538|c0_g1_i4	6	59	10.1695
Purine metabolism	map00230	ec:3.6.1.15 - phosphatase, ec:4.6.1.2 - cyclase, ec:3.1.7.2 - 3'-diphosphatase, ec:3.6.1.9 - diphosphatase, ec:2.7.6.5 - diphosphokinase, ec:6.3.4.4 - synthase, ec:3.5.4.4 - deaminase, ec:1.1.1.205 - dehydrogenase, ec:2.7.6.1 - diphosphokinase, ec:2.7.4.8 - kinase, ec:2.7.1.40 - kinase	13, 1, 1, 3, 2, 1, 2, 2, 1, 1, 3	Mj_1_GCCAAT_L005_R1_001_(paired)_trimmed_(paired)_contig_14124, TR61056|c0_g3_i1, TR64114|c0_g2_i2, TR64114|c0_g1_i3, TR64114|c0_g1_i2, TR64114|c0_g2_i3, Mj_1_GCCAAT_L005_R1_001_(paired)_trimmed_(paired)_contig_30814, TR57298|c1_g1_i3, Mj_1_GCCAAT_L005_R1_001_(paired)_trimmed_(paired)_contig_25405, Mj_1_GCCAAT_L005_R1_001_(paired)_trimmed_(paired)_contig_325, TR64259|c0_g1_i3, TR62297|c0_g2_i2, T…	11	109	10.0917
Geraniol degradation	map00281	ec:4.2.1.17 - hydratase	1	TR79248|c2_g3_i3	1	10	10
Caprolactam degradation	map00930	ec:4.2.1.17 - hydratase, ec:1.1.1.2 - dehydrogenase (NADP+)	1, 2	TR79248|c2_g3_i3, TR54499|c0_g1_i2, TR61240|c1_g1_i1	2	21	9.52381
Lysine degradation	map00310	ec:1.2.1.3 - dehydrogenase (NAD+), ec:1.5.1.10 - dehydrogenase (NADP+, L-glutamate-forming), ec:2.6.1.21 - transaminase, ec:4.2.1.17 - hydratase, ec:1.5.1.8 - dehydrogenase (NADP+, L-lysine-forming)	15, 3, 5, 1, 3	TR59948|c0_g1_i5, TR56938|c0_g1_i2, TR56938|c0_g1_i1, TR75637|c1_g1_i2, scaffold12730, TR68176|c3_g1_i5, TR68176|c3_g1_i4, TR68176|c3_g1_i3, TR68176|c3_g1_i2, TR68176|c3_g1_i1, Mj_1_GCCAAT_L005_R1_001_(paired)_trimmed_(paired)_contig_5182, TR59948|c0_g1_i4, TR59948|c0_g1_i3, TR59948|c0_g1_i2, TR59948|c0_g1_i1, TR69971|c0_g1_i1, TR69404|c0_g1_i2, Mj_1_GCCAAT_L005_R1_001_(paired)_trimmed_(paired)_c…	5	53	9.43396
D-Arginine and D-ornithine metabolism	map00472	ec:2.6.1.21 - transaminase	5	TR59535|c0_g1_i3, TR63552|c0_g2_i3, Mj_1_GCCAAT_L005_R1_001_(paired)_trimmed_(paired)_contig_2688, TR59535|c0_g1_i2, TR63552|c0_g2_i4	1	11	9.09091
Propanoate metabolism	map00640	ec:1.2.1.27 - dehydrogenase (CoA-acylating), ec:6.2.1.1 - ligase, ec:4.2.1.17 - hydratase, ec:1.2.4.4 - dehydrogenase (2-methylpropanoyl-transferring), ec:1.3.3.6 - oxidase	4, 3, 1, 2, 2	TR75546|c0_g1_i2, TR75546|c0_g1_i1, Mj_1_GCCAAT_L005_R1_001_(paired)_trimmed_(paired)_contig_13711, TR75546|c0_g1_i4, Mj_1_GCCAAT_L005_R1_001_(paired)_trimmed_(paired)_contig_17553, Mj_1_GCCAAT_L005_R1_001_(paired)_trimmed_(paired)_contig_12141, TR62817|c3_g2_i1, TR79248|c2_g3_i3, Mj_1_GCCAAT_L005_R1_001_(paired)_trimmed_(paired)_contig_7429, TR77354|c6_g1_i1, Mj_1_GCCAAT_L005_R1_001_(paired)_tri…	5	55	9.09091
N-Glycan biosynthesis	map00510	ec:3.2.1.106 - glucosidase, ec:2.4.1.117 - beta-glucosyltransferase, ec:3.2.1.113 - 1,2-alpha-mannosidase	1, 1, 3	Mj_1_GCCAAT_L005_R1_001_(paired)_trimmed_(paired)_contig_4068, TR68350|c0_g1_i3, TR60818|c2_g1_i1, Mj_1_GCCAAT_L005_R1_001_(paired)_trimmed_(paired)_contig_66992, TR60818|c2_g1_i2	3	34	8.82353
Ascorbate and aldarate metabolism	map00053	ec:1.2.1.3 - dehydrogenase (NAD+), ec:2.7.1.43 - glucuronokinase (phosphorylating), ec:1.13.99.1 - oxygenase, ec:1.1.1.2 - dehydrogenase (NADP+)	15, 1, 1, 2	TR59948|c0_g1_i5, TR56938|c0_g1_i2, TR56938|c0_g1_i1, TR75637|c1_g1_i2, scaffold12730, TR68176|c3_g1_i5, TR68176|c3_g1_i4, TR68176|c3_g1_i3, TR68176|c3_g1_i2, TR68176|c3_g1_i1, Mj_1_GCCAAT_L005_R1_001_(paired)_trimmed_(paired)_contig_5182, TR59948|c0_g1_i4, TR59948|c0_g1_i3, TR59948|c0_g1_i2, TR59948|c0_g1_i1, TR75777|c0_g2_i5, TR57722|c0_g1_i1, TR54499|c0_g1_i2, TR61240|c1_g1_i1	4	46	8.69565
Glycosaminoglycan biosynthesis - chondroitin sulfate / dermatan sulfate	map00532	ec:2.4.1.134 - 3-beta-galactosyltransferase	3	TR67233|c0_g1_i3, Mj_1_GCCAAT_L005_R1_001_(paired)_trimmed_(paired)_contig_11998, TR69769|c1_g1_i11	1	12	8.33333
Inositol phosphate metabolism	map00562	ec:2.7.1.159 - 5/6-kinase, ec:3.1.3.36 - 5-phosphatase, ec:2.7.1.134 - 1-kinase, ec:1.13.99.1 - oxygenase	1, 1, 1, 1	TR70028|c2_g1_i1, TR69812|c0_g3_i1, TR70028|c2_g1_i1, TR57722|c0_g1_i1	4	48	8.33333
Glyoxylate and dicarboxylate metabolism	map00630	ec:3.5.1.9 - kynurenine formamidase, ec:1.2.3.4 - oxidase, ec:6.2.1.1 - ligase, ec:1.1.1.26 - reductase, ec:3.1.3.18 - phosphatase, ec:1.1.3.15 - oxidase	2, 2, 3, 1, 1, 6	TR65307|c0_g1_i4, TR68123|c0_g2_i3, TR56683|c0_g1_i1, Mj_1_GCCAAT_L005_R1_001_(paired)_trimmed_(paired)_contig_63732, Mj_1_GCCAAT_L005_R1_001_(paired)_trimmed_(paired)_contig_17553, Mj_1_GCCAAT_L005_R1_001_(paired)_trimmed_(paired)_contig_12141, TR62817|c3_g2_i1, TR69172|c0_g2_i1, Mj_1_GCCAAT_L005_R1_001_(paired)_trimmed_(paired)_contig_4522, TR71209|c0_g1_i17, TR71209|c0_g1_i8, TR71209|c0_g1_i15…	6	73	8.21918
Arginine and proline metabolism	map00330	ec:3.5.1.4 - acylamidase, ec:1.2.1.3 - dehydrogenase (NAD+), ec:2.6.1.1 - transaminase, ec:2.6.1.21 - transaminase, ec:2.6.1.13 - aminotransferase, ec:1.4.3.22 - oxidase, ec:1.14.11.2 - 4-dioxygenase	7, 15, 2, 5, 4, 2, 2	TR79428|c2_g2_i2, Mj_1_GCCAAT_L005_R1_001_(paired)_trimmed_(paired)_contig_4447, TR79428|c2_g1_i4, TR79428|c2_g2_i5, TR79443|c1_g5_i6, TR79428|c2_g2_i3, TR79443|c1_g5_i1, TR59948|c0_g1_i5, TR56938|c0_g1_i2, TR56938|c0_g1_i1, TR75637|c1_g1_i2, scaffold12730, TR68176|c3_g1_i5, TR68176|c3_g1_i4, TR68176|c3_g1_i3, TR68176|c3_g1_i2, TR68176|c3_g1_i1, Mj_1_GCCAAT_L005_R1_001_(paired)_trimmed_(paired)_c…	7	86	8.13953
Vitamin B6 metabolism	map00750	ec:1.4.3.5 - 5'-phosphate synthase, ec:1.1.1.65 - 4-dehydrogenase	3, 4	TR75782|c0_g3_i8, TR61223|c2_g2_i8, TR75866|c0_g1_i1, TR33453|c0_g1_i1, TR58858|c0_g2_i1, TR77206|c2_g7_i3, Mj_1_GCCAAT_L005_R1_001_(paired)_trimmed_(paired)_contig_27328	2	25	8
Glycosphingolipid biosynthesis - globo and isoglobo series	map00603	ec:3.2.1.22 - melibiase	5	TR66260|c0_g1_i2, Mj_1_GCCAAT_L005_R1_001_(paired)_trimmed_(paired)_contig_7576, TR71478|c0_g1_i10, TR76418|c0_g2_i7, TR58483|c0_g1_i3	1	13	7.69231
Pyrimidine metabolism	map00240	ec:2.4.2.9 - phosphoribosyltransferase, ec:2.7.1.48 - kinase, ec:3.5.2.2 - hydantoinase, ec:3.6.1.9 - diphosphatase, ec:2.7.4.22 - kinase	1, 1, 7, 3, 1	TR71374|c0_g1_i2, TR71374|c0_g1_i2, TR69841|c1_g1_i4, TR69841|c1_g1_i3, TR69841|c1_g1_i2, TR69841|c1_g1_i5, TR70632|c0_g1_i2, TR70632|c0_g1_i5, TR70632|c0_g1_i7, Mj_1_GCCAAT_L005_R1_001_(paired)_trimmed_(paired)_contig_32402, TR53307|c0_g1_i3, TR53307|c0_g1_i5, TR78794|c2_g1_i1	5	65	7.69231
Steroid degradation	map00984	ec:1.1.1.145 - dehydrogenase	8	TR69323|c0_g1_i3, TR75507|c0_g1_i2, TR67307|c0_g1_i1, TR77258|c5_g1_i4, Mj_1_GCCAAT_L005_R1_001_(paired)_trimmed_(paired)_contig_23432, TR52651|c0_g1_i1, TR52651|c0_g1_i2, TR52651|c0_g1_i3	1	13	7.69231
Pentose and glucuronate interconversions	map00040	ec:2.7.1.17 - xylulokinase (phosphorylating), ec:5.3.1.5 - isomerase, ec:2.7.1.43 - glucuronokinase (phosphorylating), ec:1.1.1.2 - dehydrogenase (NADP+), ec:3.1.1.11 - pectin demethoxylase	1, 1, 1, 2, 10	TR69145|c0_g1_i3, TR62156|c0_g1_i1, TR75777|c0_g2_i5, TR54499|c0_g1_i2, TR61240|c1_g1_i1, TR63093|c0_g1_i2, TR63010|c0_g1_i2, TR62660|c0_g1_i1, TR63807|c0_g1_i3, TR63010|c0_g1_i1, TR65240|c0_g2_i5, TR58934|c0_g2_i2, TR65240|c0_g2_i2, Mj_1_GCCAAT_L005_R1_001_(paired)_trimmed_(paired)_contig_44465, TR63007|c0_g1_i3	5	67	7.46269
Polyketide sugar unit biosynthesis	map00523	ec:4.2.1.46 - 4,6-dehydratase, ec:1.1.1.133 - reductase	3, 3	Mj_1_GCCAAT_L005_R1_001_(paired)_trimmed_(paired)_contig_3497, TR77211|c0_g1_i3, TR77211|c0_g1_i2, Mj_1_GCCAAT_L005_R1_001_(paired)_trimmed_(paired)_contig_3497, TR77211|c0_g1_i3, TR77211|c0_g1_i2	2	27	7.40741
Methane metabolism	map00680	ec:6.2.1.1 - ligase, ec:4.4.1.19 - synthase, ec:4.2.1.11 - hydratase, ec:3.1.3.3 - phosphatase, ec:4.1.2.13 - aldolase, ec:2.7.1.11 - phosphohexokinase	3, 4, 2, 1, 1, 2	Mj_1_GCCAAT_L005_R1_001_(paired)_trimmed_(paired)_contig_17553, Mj_1_GCCAAT_L005_R1_001_(paired)_trimmed_(paired)_contig_12141, TR62817|c3_g2_i1, TR54145|c0_g2_i3, TR54145|c0_g2_i2, TR51347|c0_g1_i1, TR54145|c0_g2_i5, C966436, Mj_1_GCCAAT_L005_R1_001_(paired)_trimmed_(paired)_contig_18835, TR59469|c0_g1_i1, TR78695|c0_g2_i2, TR75056|c1_g1_i2, scaffold1295	6	82	7.31707
Acarbose and validamycin biosynthesis	map00525	ec:4.2.1.46 - 4,6-dehydratase	3	Mj_1_GCCAAT_L005_R1_001_(paired)_trimmed_(paired)_contig_3497, TR77211|c0_g1_i3, TR77211|c0_g1_i2	1	14	7.14286
Valine, leucine and isoleucine biosynthesis	map00290	ec:2.6.1.42 - transaminase	3	TR66293|c1_g3_i1, TR77453|c0_g1_i4, TR61084|c0_g2_i2	1	14	7.14286
Fructose and mannose metabolism	map00051	ec:5.3.1.5 - isomerase, ec:4.1.2.13 - aldolase, ec:2.7.7.13 - guanylyltransferase, ec:2.7.1.11 - phosphohexokinase, ec:5.3.1.8 - isomerase	1, 1, 1, 2, 1	TR62156|c0_g1_i1, TR78695|c0_g2_i2, scaffold10338, TR75056|c1_g1_i2, scaffold1295, TR67242|c0_g2_i2	5	75	6.66667
Glucosinolate biosynthesis	map00966	ec:2.6.1.42 - transaminase	3	TR66293|c1_g3_i1, TR77453|c0_g1_i4, TR61084|c0_g2_i2	1	15	6.66667
Glycosaminoglycan degradation	map00531	ec:3.2.1.23 - lactase (ambiguous)	2	TR74361|c0_g1_i2, TR74361|c0_g1_i3	1	15	6.66667
Flavone and flavonol biosynthesis	map00944	ec:1.14.14.81 - 3',5'-hydroxylase, ec:1.14.14.82 - 3'-monooxygenase	5, 1	TR68451|c0_g2_i4, C968328, TR63574|c0_g1_i1, Mj_1_GCCAAT_L005_R1_001_(paired)_trimmed_(paired)_contig_81788, Mj_1_GCCAAT_L005_R1_001_(paired)_trimmed_(paired)_contig_5192, TR58725|c0_g1_i2	2	32	6.25
Folate biosynthesis	map00790	ec:3.5.4.25 - cyclohydrolase II, ec:3.4.19.9 - gamma-glutamyl hydrolase, ec:4.1.3.38 - lyase	1, 1, 5	Mj_1_GCCAAT_L005_R1_001_(paired)_trimmed_(paired)_contig_9011, Mj_1_GCCAAT_L005_R1_001_(paired)_trimmed_(paired)_contig_13962, TR59535|c0_g1_i3, TR63552|c0_g2_i3, Mj_1_GCCAAT_L005_R1_001_(paired)_trimmed_(paired)_contig_2688, TR59535|c0_g1_i2, TR63552|c0_g2_i4	3	51	5.88235
Glycine, serine and threonine metabolism	map00260	ec:2.7.2.4 - kinase, ec:1.1.1.1 - dehydrogenase, ec:1.4.3.21 - oxidase, ec:3.1.3.3 - phosphatase	1, 5, 3, 1	TR72784|c0_g1_i1, TR71294|c2_g1_i6, Mj_1_GCCAAT_L005_R1_001_(paired)_trimmed_(paired)_contig_31943, TR71294|c2_g1_i5, TR71294|c1_g1_i5, TR79055|c2_g2_i4, TR66763|c0_g1_i2, TR59746|c0_g1_i4, TR65335|c0_g1_i2, TR59469|c0_g1_i1	4	68	5.88235
Nitrogen metabolism	map00910	ec:3.5.5.1 - acetonitrilase, ec:1.4.1.4 - dehydrogenase (NADP+)	1, 1	TR70893|c0_g1_i1, TR76379|c0_g3_i8	2	37	5.40541
Peptidoglycan biosynthesis	map00550	ec:1.3.1.98 - dehydrogenase	1	Mj_1_GCCAAT_L005_R1_001_(paired)_trimmed_(paired)_contig_22136	1	19	5.26316
Taurine and hypotaurine metabolism	map00430	ec:2.3.2.2 - glutamyl transpeptidase	1	TR72026|c0_g1_i2	1	19	5.26316
Chlorocyclohexane and chlorobenzene degradation	map00361	ec:3.1.1.45 - maleylacetate enol-lactonase	6	TR68429|c0_g1_i3, TR68429|c0_g1_i4, TR64624|c0_g1_i2, TR68415|c0_g1_i1, TR70308|c0_g1_i1, TR76599|c0_g1_i1	1	21	4.7619
Monoterpenoid biosynthesis	map00902	ec:4.2.3.20 - synthase, ec:1.14.19.62 - synthase	9, 1	Mj_1_GCCAAT_L005_R1_001_(paired)_trimmed_(paired)_contig_20380, TR78769|c0_g3_i4, TR71532|c1_g1_i2, TR78769|c0_g1_i2, TR78769|c0_g1_i1, Mj_1_GCCAAT_L005_R1_001_(paired)_trimmed_(paired)_contig_18142, C911633, TR71532|c0_g1_i2, scaffold12403, TR50291|c0_g1_i2	2	43	4.65116
Various types of N-glycan biosynthesis	map00513	ec:3.2.1.113 - 1,2-alpha-mannosidase	3	TR60818|c2_g1_i1, Mj_1_GCCAAT_L005_R1_001_(paired)_trimmed_(paired)_contig_66992, TR60818|c2_g1_i2	1	23	4.34783
Steroid biosynthesis	map00100	ec:1.1.1.170 - 3-dehydrogenase (decarboxylating)	3	TR52651|c0_g1_i1, TR52651|c0_g1_i2, TR52651|c0_g1_i3	1	25	4
Toluene degradation	map00623	ec:3.1.1.45 - maleylacetate enol-lactonase	6	TR68429|c0_g1_i3, TR68429|c0_g1_i4, TR64624|c0_g1_i2, TR68415|c0_g1_i1, TR70308|c0_g1_i1, TR76599|c0_g1_i1	1	25	4
Neomycin, kanamycin and gentamicin biosynthesis	map00524	ec:2.7.1.2 - glucokinase (phosphorylating)	1	TR75777|c0_g2_i5	1	28	3.57143
Porphyrin and chlorophyll metabolism	map00860	ec:4.99.1.1 - ferrochelatase, ec:3.1.1.14 - CLH, ec:1.3.3.4 - oxidase	1, 1, 2	TR68890|c2_g1_i7, Mj_1_GCCAAT_L005_R1_001_(paired)_trimmed_(paired)_contig_10002, TR75782|c0_g3_i8, TR75866|c0_g1_i1	3	105	2.85714
Carotenoid biosynthesis	map00906	ec:1.14.14.137 - acid 8'-hydroxylase	2	TR52545|c0_g1_i2, TR55808|c0_g1_i1	1	37	2.7027
Sesquiterpenoid and triterpenoid biosynthesis	map00909	ec:4.2.3.13 - synthase, ec:4.2.3.22 - synthase	1, 4	Mj_1_GCCAAT_L005_R1_001_(paired)_trimmed_(paired)_contig_10590, TR77737|c2_g3_i3, TR78346|c0_g5_i1, TR77737|c0_g1_i1, TR78346|c0_g4_i1	2	80	2.5
Sulfur metabolism	map00920	ec:2.5.1.47 - synthase	1	TR56390|c0_g1_i2	1	48	2.08333
Benzoate degradation	map00362	ec:4.2.1.17 - hydratase	1	TR79248|c2_g3_i3	1	69	1.44928

## Sheet: TransM15_KEGG
Table S13 KEGG pathway mapping of transcript modules sharing high correlation coefficient (PCC > 0.7) with the identified metabolite modules in Mallotus japonicus.
Pathway	Pathway ID	Enzyme	#Seqs of Enzyme	Seqs	#Enzs in Pathway	#KEGG Enzymes	Ratio of enzymes in our sample in kegg enzymes (%)
Metabolism of xenobiotics by cytochrome P450	map00980	ec:1.1.1.184 - reductase (NADPH), ec:1.2.1.5 - dehydrogenase [NAD(P)+], ec:1.1.1.1 - dehydrogenase, ec:1.1.1.146 - dehydrogenase, ec:2.5.1.18 - transferase, ec:3.3.2.9 - epoxide hydrolase, ec:2.4.1.17 - 1-naphthol glucuronyltransferase	2, 13, 16, 1, 6, 1, 1	C942700, scaffold14033, TR66779|c3_g1_i1, Mj_1_GCCAAT_L005_R1_001_(paired)_trimmed_(paired)_contig_89731, C923530, TR64039|c0_g1_i1, TR79292|c3_g4_i5, TR64039|c0_g1_i3, TR64340|c1_g1_i10, TR64340|c2_g3_i4, C915615, TR17822|c0_g1_i1, TR64039|c0_g1_i5, TR66779|c3_g5_i1, TR66779|c3_g5_i5, scaffold14032, scaffold14033, TR72553|c3_g1_i3, TR76723|c3_g2_i4, TR76723|c3_g3_i5, TR72553|c3_g1_i7, TR57450|c1…	7	10	70
Photosynthesis	map00195	ec:7.1.2.2 - two-sector ATPase, ec:1.18.1.2 - reductase	6, 2	TR61144|c0_g2_i1, Mj_1_GCCAAT_L005_R1_001_(paired)_trimmed_(paired)_contig_98978, TR55238|c0_g1_i1, TR64582|c4_g3_i7, Mj_1_GCCAAT_L005_R1_001_(paired)_trimmed_(paired)_contig_85726, Mj_1_GCCAAT_L005_R1_001_(paired)_trimmed_(paired)_contig_90504, TR56770|c0_g1_i2, TR56770|c1_g1_i1	2	3	66.6667
Drug metabolism - cytochrome P450	map00982	ec:1.2.1.5 - dehydrogenase [NAD(P)+], ec:1.1.1.1 - dehydrogenase, ec:1.14.13.8 - monooxygenase, ec:2.5.1.18 - transferase, ec:2.4.1.17 - 1-naphthol glucuronyltransferase	13, 16, 1, 6, 1	TR66779|c3_g1_i1, Mj_1_GCCAAT_L005_R1_001_(paired)_trimmed_(paired)_contig_89731, C923530, TR64039|c0_g1_i1, TR79292|c3_g4_i5, TR64039|c0_g1_i3, TR64340|c1_g1_i10, TR64340|c2_g3_i4, C915615, TR17822|c0_g1_i1, TR64039|c0_g1_i5, TR66779|c3_g5_i1, TR66779|c3_g5_i5, scaffold14032, scaffold14033, TR72553|c3_g1_i3, TR76723|c3_g2_i4, TR76723|c3_g3_i5, TR72553|c3_g1_i7, TR57450|c1_g1_i3, TR68882|c2_g1_i1…	5	8	62.5
Carbon fixation in photosynthetic organisms	map00710	ec:5.1.3.1 - 3-epimerase, ec:4.1.1.49 - carboxykinase (ATP), ec:4.1.1.39 - carboxylase, ec:2.7.2.3 - kinase, ec:2.7.1.19 - phosphopentokinase, ec:1.2.1.12 - dehydrogenase (phosphorylating), ec:3.1.3.11 - hexose diphosphatase, ec:3.1.3.37 - SBPase, ec:1.1.1.37 - dehydrogenase, ec:5.3.1.6 - isomerase, ec:1.2.1.13 - dehydrogenase (NADP+) (phosphorylating), ec:1.2.1.59 - dehydrogenase (NAD(P)+) (phos…	1, 2, 4, 1, 2, 1, 1, 1, 1, 3, 2, 2, 1, 2	TR56826|c0_g1_i2, Mj_1_GCCAAT_L005_R1_001_(paired)_trimmed_(paired)_contig_1224, TR71488|c1_g3_i2, TR73002|c1_g2_i2, Mj_1_GCCAAT_L005_R1_001_(paired)_trimmed_(paired)_contig_93347, TR73002|c0_g1_i1, Mj_1_GCCAAT_L005_R1_001_(paired)_trimmed_(paired)_contig_45970, TR47071|c0_g1_i1, TR54805|c0_g1_i1, TR52657|c0_g1_i1, TR68112|c0_g1_i1, TR47875|c0_g1_i2, TR47875|c0_g1_i2, TR61436|c0_g1_i1, Mj_1_GCCAA…	14	25	56
alpha-Linolenic acid metabolism	map00592	ec:1.1.1.1 - dehydrogenase, ec:4.2.1.17 - hydratase, ec:1.13.11.12 - 13S-lipoxygenase, ec:3.1.1.32 - A1	16, 1, 3, 1	scaffold14032, scaffold14033, TR72553|c3_g1_i3, TR76723|c3_g2_i4, TR76723|c3_g3_i5, TR72553|c3_g1_i7, TR57450|c1_g1_i3, TR68882|c2_g1_i10, TR68882|c2_g1_i1, TR76723|c3_g5_i1, TR50992|c0_g1_i1, TR68882|c2_g1_i4, TR21073|c0_g1_i1, TR72553|c2_g1_i1, TR68882|c2_g1_i2, TR72553|c3_g1_i16, TR75317|c1_g1_i4, TR72444|c0_g1_i1, Mj_1_GCCAAT_L005_R1_001_(paired)_trimmed_(paired)_contig_29488, TR79081|c0_g3_i…	4	12	33.3333
Betalain biosynthesis	map00965	ec:2.1.1.6 - O-methyltransferase	1	TR73260|c1_g1_i3	1	3	33.3333
Drug metabolism - other enzymes	map00983	ec:3.1.1.1 - ali-esterase, ec:2.7.4.6 - kinase, ec:2.5.1.18 - transferase, ec:2.3.1.5 - N-acetyltransferase, ec:2.4.1.17 - 1-naphthol glucuronyltransferase	13, 1, 6, 5, 1	Mj_1_GCCAAT_L005_R1_001_(paired)_trimmed_(paired)_contig_9193, Mj_1_GCCAAT_L005_R1_001_(paired)_trimmed_(paired)_contig_13454, TR43199|c0_g2_i2, TR43199|c0_g2_i1, TR59225|c0_g1_i1, Mj_1_GCCAAT_L005_R1_001_(paired)_trimmed_(paired)_contig_105075, Mj_1_GCCAAT_L005_R1_001_(paired)_trimmed_(paired)_contig_88380, TR70322|c0_g9_i2, TR36106|c1_g1_i1, TR72415|c1_g1_i4, Mj_1_GCCAAT_L005_R1_001_(paired)_tr…	5	18	27.7778
Oxidative phosphorylation	map00190	ec:3.6.1.1 - diphosphatase, ec:7.1.2.1 - H+-exporting transporter, ec:7.1.2.2 - two-sector ATPase	3, 7, 6	TR41746|c0_g2_i2, TR67768|c2_g2_i3, TR41746|c0_g2_i1, TR43894|c0_g1_i1, TR47496|c1_g1_i2, TR45457|c0_g1_i1, TR53481|c0_g1_i1, TR55000|c0_g2_i3, Mj_1_GCCAAT_L005_R1_001_(paired)_trimmed_(paired)_contig_10420, TR46752|c1_g1_i1, TR61144|c0_g2_i1, Mj_1_GCCAAT_L005_R1_001_(paired)_trimmed_(paired)_contig_98978, TR55238|c0_g1_i1, TR64582|c4_g3_i7, Mj_1_GCCAAT_L005_R1_001_(paired)_trimmed_(paired)_conti…	3	11	27.2727
Chloroalkane and chloroalkene degradation	map00625	ec:1.2.1.3 - dehydrogenase (NAD+), ec:1.2.1.46 - dehydrogenase, ec:1.1.1.1 - dehydrogenase, ec:3.3.2.10 - epoxide hydrolase	18, 1, 16, 2	TR66779|c3_g1_i1, TR77310|c2_g3_i1, Mj_1_GCCAAT_L005_R1_001_(paired)_trimmed_(paired)_contig_89731, C923530, TR64039|c0_g1_i1, TR79292|c3_g4_i5, TR64039|c0_g1_i3, TR64340|c1_g1_i10, TR77310|c2_g3_i7, TR64340|c2_g3_i4, TR77310|c2_g3_i12, C915615, TR17822|c0_g1_i1, TR72401|c2_g2_i1, TR64039|c0_g1_i5, TR66779|c3_g5_i1, TR79292|c3_g4_i2, TR66779|c3_g5_i5, Mj_1_GCCAAT_L005_R1_001_(paired)_trimmed_(pai…	4	16	25
Other glycan degradation	map00511	ec:3.2.1.23 - lactase (ambiguous), ec:3.2.1.24 - alpha-D-mannosidase	4, 5	TR63671|c1_g1_i2, Mj_1_GCCAAT_L005_R1_001_(paired)_trimmed_(paired)_contig_7609, TR63671|c0_g1_i1, TR63671|c1_g1_i1, TR73239|c0_g1_i5, Mj_1_GCCAAT_L005_R1_001_(paired)_trimmed_(paired)_contig_16417, TR73239|c0_g1_i2, TR73239|c0_g1_i3, scaffold12940	2	9	22.2222
Glycolysis / Gluconeogenesis	map00010	ec:4.1.1.32 - carboxykinase (GTP), ec:1.2.1.3 - dehydrogenase (NAD+), ec:4.1.1.49 - carboxykinase (ATP), ec:2.7.2.3 - kinase, ec:1.2.1.12 - dehydrogenase (phosphorylating), ec:1.2.1.5 - dehydrogenase [NAD(P)+], ec:3.1.3.11 - hexose diphosphatase, ec:1.1.1.1 - dehydrogenase, ec:1.2.1.59 - dehydrogenase (NAD(P)+) (phosphorylating), ec:4.1.2.13 - aldolase	1, 18, 2, 1, 1, 13, 1, 16, 2, 2	Mj_1_GCCAAT_L005_R1_001_(paired)_trimmed_(paired)_contig_1224, TR66779|c3_g1_i1, TR77310|c2_g3_i1, Mj_1_GCCAAT_L005_R1_001_(paired)_trimmed_(paired)_contig_89731, C923530, TR64039|c0_g1_i1, TR79292|c3_g4_i5, TR64039|c0_g1_i3, TR64340|c1_g1_i10, TR77310|c2_g3_i7, TR64340|c2_g3_i4, TR77310|c2_g3_i12, C915615, TR17822|c0_g1_i1, TR72401|c2_g2_i1, TR64039|c0_g1_i5, TR66779|c3_g5_i1, TR79292|c3_g4_i2, …	10	47	21.2766
Cyanoamino acid metabolism	map00460	ec:1.14.14.37 - oxime monooxygenase, ec:4.2.1.65 - hydratase, ec:3.2.1.21 - gentiobiase, ec:4.4.1.9 - synthase, ec:2.1.2.1 - hydroxymethyltransferase, ec:3.5.5.4 - nitrilase	3, 1, 12, 4, 3, 1	C968662, Mj_1_GCCAAT_L005_R1_001_(paired)_trimmed_(paired)_contig_82697, TR46270|c0_g1_i1, scaffold12506, TR50156|c0_g1_i2, TR76903|c0_g1_i9, TR74776|c0_g1_i2, Mj_1_GCCAAT_L005_R1_001_(paired)_trimmed_(paired)_contig_11294, Mj_1_GCCAAT_L005_R1_001_(paired)_trimmed_(paired)_contig_9813, TR66197|c1_g1_i2, TR66197|c1_g1_i1, TR54285|c0_g1_i2, TR76903|c0_g1_i6, TR54285|c0_g1_i1, TR56267|c0_g1_i3, TR75…	6	29	20.6897
Glutathione metabolism	map00480	ec:1.11.1.11 - peroxidase, ec:1.11.1.12 - glutathione peroxidase, ec:2.5.1.16 - synthase, ec:1.11.1.9 - peroxidase, ec:3.5.2.9 - (ATP-hydrolysing), ec:2.5.1.18 - transferase, ec:1.1.1.42 - dehydrogenase (NADP+)	1, 1, 3, 1, 1, 6, 1	Mj_1_GCCAAT_L005_R1_001_(paired)_trimmed_(paired)_contig_91897, TR69535|c0_g1_i3, Mj_1_GCCAAT_L005_R1_001_(paired)_trimmed_(paired)_contig_4228, TR65254|c0_g1_i2, TR65254|c0_g1_i1, TR69535|c0_g1_i3, TR77789|c0_g1_i3, TR59459|c0_g1_i2, TR48466|c0_g1_i1, TR68528|c1_g1_i4, TR69048|c0_g1_i1, TR56840|c0_g1_i1, TR69048|c0_g1_i2, TR67941|c0_g2_i1	7	38	18.4211
Flavonoid biosynthesis	map00941	ec:1.1.1.219 - 4-reductase, ec:1.14.20.4 - synthase, ec:1.14.11.9 - 3-dioxygenase, ec:1.14.20.6 - synthase	5, 1, 1, 3	TR69944|c2_g2_i3, TR69944|c2_g2_i4, TR70777|c1_g1_i1, TR69944|c2_g2_i5, Mj_1_GCCAAT_L005_R1_001_(paired)_trimmed_(paired)_contig_2916, TR68600|c0_g2_i1, Mj_1_GCCAAT_L005_R1_001_(paired)_trimmed_(paired)_contig_12119, TR35830|c0_g1_i1, TR22660|c0_g1_i1, TR68600|c0_g2_i1	4	22	18.1818
Fatty acid biosynthesis	map00061	ec:2.3.1.85 - synthase system, ec:1.1.1.100 - reductase, ec:2.3.1.86 - synthase system	1, 1, 1	TR65453|c0_g1_i2, TR65453|c0_g1_i2, TR68934|c1_g2_i5	3	17	17.6471
Phosphatidylinositol signaling system	map04070	ec:3.1.4.11 - phospholipase C, ec:2.7.1.159 - 5/6-kinase, ec:3.1.3.36 - 5-phosphatase, ec:3.1.3.56 - 5-phosphatase, ec:2.7.7.41 - cytidylyltransferase	2, 1, 2, 1, 2	TR44451|c0_g1_i1, TR45620|c0_g1_i2, TR79224|c1_g2_i5, TR63137|c1_g1_i2, TR63137|c0_g1_i2, TR69524|c0_g1_i2, scaffold13643, TR69758|c1_g1_i4	5	29	17.2414
Phenylpropanoid biosynthesis	map00940	ec:3.2.1.126 - beta-glucosidase, ec:2.1.1.146 - O-methyltransferase, ec:1.2.1.68 - dehydrogenase, ec:3.2.1.21 - gentiobiase, ec:1.11.1.7 - lactoperoxidase	2, 1, 2, 12, 21	TR66197|c1_g1_i1, TR66197|c1_g1_i2, TR73260|c1_g1_i3, TR72401|c2_g2_i1, TR72401|c2_g2_i5, TR50156|c0_g1_i2, TR76903|c0_g1_i9, TR74776|c0_g1_i2, Mj_1_GCCAAT_L005_R1_001_(paired)_trimmed_(paired)_contig_11294, Mj_1_GCCAAT_L005_R1_001_(paired)_trimmed_(paired)_contig_9813, TR66197|c1_g1_i2, TR66197|c1_g1_i1, TR54285|c0_g1_i2, TR76903|c0_g1_i6, TR54285|c0_g1_i1, TR56267|c0_g1_i3, TR75973|c0_g1_i12, M…	5	30	16.6667
Selenocompound metabolism	map00450	ec:4.4.1.1 - gamma-lyase, ec:2.7.7.4 - adenylyltransferase, ec:6.1.1.10 - ligase	1, 3, 3	TR77103|c1_g1_i2, TR54698|c1_g1_i2, C929902, TR54698|c1_g1_i3, TR22385|c0_g1_i1, Mj_1_GCCAAT_L005_R1_001_(paired)_trimmed_(paired)_contig_42143, TR46134|c0_g1_i2	3	18	16.6667
Citrate cycle (TCA cycle)	map00020	ec:4.1.1.32 - carboxykinase (GTP), ec:4.1.1.49 - carboxykinase (ATP), ec:1.1.1.37 - dehydrogenase, ec:1.1.1.42 - dehydrogenase (NADP+)	1, 2, 1, 1	Mj_1_GCCAAT_L005_R1_001_(paired)_trimmed_(paired)_contig_1224, Mj_1_GCCAAT_L005_R1_001_(paired)_trimmed_(paired)_contig_1224, TR71488|c1_g3_i2, TR61436|c0_g1_i1, TR67941|c0_g2_i1	4	25	16
Inositol phosphate metabolism	map00562	ec:3.1.4.11 - phospholipase C, ec:2.7.1.159 - 5/6-kinase, ec:3.1.3.36 - 5-phosphatase, ec:2.7.1.134 - 1-kinase, ec:1.1.1.18 - 2-dehydrogenase, ec:3.1.3.56 - 5-phosphatase, ec:3.1.4.3 - C	2, 1, 2, 1, 1, 1, 2	TR44451|c0_g1_i1, TR45620|c0_g1_i2, TR79224|c1_g2_i5, TR63137|c1_g1_i2, TR63137|c0_g1_i2, TR79224|c1_g2_i5, TR50992|c0_g1_i1, TR69524|c0_g1_i2, TR44451|c0_g1_i1, TR45620|c0_g1_i2	7	48	14.5833
Penicillin and cephalosporin biosynthesis	map00311	ec:5.1.1.17 - epimerase, ec:3.5.2.6 - penicillinase	1, 2	TR77103|c1_g1_i2, TR57496|c0_g1_i1, scaffold108	2	14	14.2857
Valine, leucine and isoleucine degradation	map00280	ec:1.2.1.3 - dehydrogenase (NAD+), ec:3.1.2.4 - hydrolase, ec:2.6.1.42 - transaminase, ec:1.4.3.2 - oxidase, ec:4.2.1.17 - hydratase	18, 1, 6, 1, 1	TR66779|c3_g1_i1, TR77310|c2_g3_i1, Mj_1_GCCAAT_L005_R1_001_(paired)_trimmed_(paired)_contig_89731, C923530, TR64039|c0_g1_i1, TR79292|c3_g4_i5, TR64039|c0_g1_i3, TR64340|c1_g1_i10, TR77310|c2_g3_i7, TR64340|c2_g3_i4, TR77310|c2_g3_i12, C915615, TR17822|c0_g1_i1, TR72401|c2_g2_i1, TR64039|c0_g1_i5, TR66779|c3_g5_i1, TR79292|c3_g4_i2, TR66779|c3_g5_i5, TR75317|c1_g1_i4, TR71909|c0_g1_i1, TR71909|c…	5	36	13.8889
Fatty acid degradation	map00071	ec:1.2.1.3 - dehydrogenase (NAD+), ec:1.1.1.1 - dehydrogenase, ec:4.2.1.17 - hydratase, ec:5.3.3.8 - isomerase	18, 16, 1, 1	TR66779|c3_g1_i1, TR77310|c2_g3_i1, Mj_1_GCCAAT_L005_R1_001_(paired)_trimmed_(paired)_contig_89731, C923530, TR64039|c0_g1_i1, TR79292|c3_g4_i5, TR64039|c0_g1_i3, TR64340|c1_g1_i10, TR77310|c2_g3_i7, TR64340|c2_g3_i4, TR77310|c2_g3_i12, C915615, TR17822|c0_g1_i1, TR72401|c2_g2_i1, TR64039|c0_g1_i5, TR66779|c3_g5_i1, TR79292|c3_g4_i2, TR66779|c3_g5_i5, scaffold14032, scaffold14033, TR72553|c3_g1_i…	4	29	13.7931
beta-Alanine metabolism	map00410	ec:1.2.1.3 - dehydrogenase (NAD+), ec:3.1.2.4 - hydrolase, ec:1.2.1.5 - dehydrogenase [NAD(P)+], ec:4.2.1.17 - hydratase, ec:1.4.3.21 - oxidase	18, 1, 13, 1, 1	TR66779|c3_g1_i1, TR77310|c2_g3_i1, Mj_1_GCCAAT_L005_R1_001_(paired)_trimmed_(paired)_contig_89731, C923530, TR64039|c0_g1_i1, TR79292|c3_g4_i5, TR64039|c0_g1_i3, TR64340|c1_g1_i10, TR77310|c2_g3_i7, TR64340|c2_g3_i4, TR77310|c2_g3_i12, C915615, TR17822|c0_g1_i1, TR72401|c2_g2_i1, TR64039|c0_g1_i5, TR66779|c3_g5_i1, TR79292|c3_g4_i2, TR66779|c3_g5_i5, TR75317|c1_g1_i4, TR66779|c3_g1_i1, Mj_1_GCCA…	5	37	13.5135
Ether lipid metabolism	map00565	ec:3.1.4.4 - D, ec:3.1.3.4 - phosphatase, ec:3.1.4.3 - C	3, 1, 2	TR75009|c1_g5_i9, TR76736|c1_g4_i4, TR61919|c1_g7_i2, TR67609|c0_g1_i5, TR44451|c0_g1_i1, TR45620|c0_g1_i2	3	23	13.0435
Glycerolipid metabolism	map00561	ec:1.2.1.3 - dehydrogenase (NAD+), ec:3.1.1.23 - lipase, ec:3.1.3.4 - phosphatase, ec:3.1.1.3 - lipase, ec:2.3.1.15 - 1-O-acyltransferase	18, 1, 1, 3, 1	TR66779|c3_g1_i1, TR77310|c2_g3_i1, Mj_1_GCCAAT_L005_R1_001_(paired)_trimmed_(paired)_contig_89731, C923530, TR64039|c0_g1_i1, TR79292|c3_g4_i5, TR64039|c0_g1_i3, TR64340|c1_g1_i10, TR77310|c2_g3_i7, TR64340|c2_g3_i4, TR77310|c2_g3_i12, C915615, TR17822|c0_g1_i1, TR72401|c2_g2_i1, TR64039|c0_g1_i5, TR66779|c3_g5_i1, TR79292|c3_g4_i2, TR66779|c3_g5_i5, Mj_1_GCCAAT_L005_R1_001_(paired)_trimmed_(pai…	5	39	12.8205
Cutin, suberine and wax biosynthesis	map00073	ec:1.11.2.3 - seed peroxygenase	1	Mj_1_GCCAAT_L005_R1_001_(paired)_trimmed_(paired)_contig_73445	1	8	12.5
Glycosphingolipid biosynthesis - ganglio series	map00604	ec:3.2.1.23 - lactase (ambiguous)	4	TR63671|c1_g1_i2, Mj_1_GCCAAT_L005_R1_001_(paired)_trimmed_(paired)_contig_7609, TR63671|c0_g1_i1, TR63671|c1_g1_i1	1	8	12.5
Limonene and pinene degradation	map00903	ec:1.2.1.3 - dehydrogenase (NAD+), ec:4.2.1.17 - hydratase	18, 1	TR66779|c3_g1_i1, TR77310|c2_g3_i1, Mj_1_GCCAAT_L005_R1_001_(paired)_trimmed_(paired)_contig_89731, C923530, TR64039|c0_g1_i1, TR79292|c3_g4_i5, TR64039|c0_g1_i3, TR64340|c1_g1_i10, TR77310|c2_g3_i7, TR64340|c2_g3_i4, TR77310|c2_g3_i12, C915615, TR17822|c0_g1_i1, TR72401|c2_g2_i1, TR64039|c0_g1_i5, TR66779|c3_g5_i1, TR79292|c3_g4_i2, TR66779|c3_g5_i5, TR75317|c1_g1_i4	2	16	12.5
Cysteine and methionine metabolism	map00270	ec:2.5.1.16 - synthase, ec:4.4.1.1 - gamma-lyase, ec:2.7.2.4 - kinase, ec:2.6.1.42 - transaminase, ec:1.4.3.2 - oxidase, ec:1.1.1.37 - dehydrogenase, ec:2.5.1.47 - synthase, ec:1.14.17.4 - oxidase, ec:4.1.1.50 - decarboxylase	3, 1, 1, 6, 1, 1, 10, 3, 2	Mj_1_GCCAAT_L005_R1_001_(paired)_trimmed_(paired)_contig_4228, TR65254|c0_g1_i2, TR65254|c0_g1_i1, TR77103|c1_g1_i2, Mj_1_GCCAAT_L005_R1_001_(paired)_trimmed_(paired)_contig_5573, TR71909|c0_g1_i1, TR71909|c0_g1_i3, TR71909|c0_g1_i2, TR70629|c0_g1_i3, TR70629|c0_g1_i2, TR68904|c0_g2_i1, Mj_1_GCCAAT_L005_R1_001_(paired)_trimmed_(paired)_contig_11851, TR61436|c0_g1_i1, TR63833|c0_g1_i2, TR63833|c0_…	9	76	11.8421
Starch and sucrose metabolism	map00500	ec:3.2.1.4 - endo-1,4-beta-D-glucanase, ec:2.4.1.34 - synthase, ec:3.2.1.20 - maltase, ec:3.2.1.21 - gentiobiase, ec:3.2.1.1 - glycogenase, ec:3.2.1.91 - 1,4-beta-cellobiosidase (non-reducing end), ec:3.2.1.2 - saccharogen amylase, ec:3.2.1.39 - endo-1,3-beta-D-glucosidase, ec:2.4.1.12 - synthase (UDP-forming)	3, 1, 1, 12, 1, 3, 1, 2, 2	TR66298|c0_g1_i1, TR70388|c1_g1_i4, Mj_1_GCCAAT_L005_R1_001_(paired)_trimmed_(paired)_contig_97421, TR62101|c0_g1_i1, TR67079|c0_g1_i2, TR50156|c0_g1_i2, TR76903|c0_g1_i9, TR74776|c0_g1_i2, Mj_1_GCCAAT_L005_R1_001_(paired)_trimmed_(paired)_contig_11294, Mj_1_GCCAAT_L005_R1_001_(paired)_trimmed_(paired)_contig_9813, TR66197|c1_g1_i2, TR66197|c1_g1_i1, TR54285|c0_g1_i2, TR76903|c0_g1_i6, TR54285|c0…	9	77	11.6883
Arachidonic acid metabolism	map00590	ec:1.11.1.9 - peroxidase, ec:1.1.1.184 - reductase (NADPH), ec:3.3.2.10 - epoxide hydrolase	1, 2, 2	TR69535|c0_g1_i3, C942700, scaffold14033, TR51668|c0_g1_i2, Mj_1_GCCAAT_L005_R1_001_(paired)_trimmed_(paired)_contig_8393	3	26	11.5385
Glycerophospholipid metabolism	map00564	ec:3.1.4.4 - D, ec:3.1.4.46 - phosphodiesterase, ec:3.1.3.4 - phosphatase, ec:2.3.1.15 - 1-O-acyltransferase, ec:2.7.7.41 - cytidylyltransferase, ec:3.1.4.3 - C, ec:3.1.1.32 - A1	3, 2, 1, 1, 2, 2, 1	TR75009|c1_g5_i9, TR76736|c1_g4_i4, TR61919|c1_g7_i2, Mj_1_GCCAAT_L005_R1_001_(paired)_trimmed_(paired)_contig_148, TR70502|c0_g1_i1, TR67609|c0_g1_i5, Mj_1_GCCAAT_L005_R1_001_(paired)_trimmed_(paired)_contig_73445, scaffold13643, TR69758|c1_g1_i4, TR44451|c0_g1_i1, TR45620|c0_g1_i2, Mj_1_GCCAAT_L005_R1_001_(paired)_trimmed_(paired)_contig_75304	7	62	11.2903
Fluorobenzoate degradation	map00364	ec:4.2.1.84 - hydratase, ec:3.1.1.45 - maleylacetate enol-lactonase	1, 1	scaffold12506, scaffold12295	2	18	11.1111
Naphthalene degradation	map00626	ec:1.1.1.1 - dehydrogenase	16	scaffold14032, scaffold14033, TR72553|c3_g1_i3, TR76723|c3_g2_i4, TR76723|c3_g3_i5, TR72553|c3_g1_i7, TR57450|c1_g1_i3, TR68882|c2_g1_i10, TR68882|c2_g1_i1, TR76723|c3_g5_i1, TR50992|c0_g1_i1, TR68882|c2_g1_i4, TR21073|c0_g1_i1, TR72553|c2_g1_i1, TR68882|c2_g1_i2, TR72553|c3_g1_i16	1	9	11.1111
Sphingolipid metabolism	map00600	ec:3.1.3.4 - phosphatase, ec:4.1.2.27 - aldolase, ec:3.2.1.23 - lactase (ambiguous)	1, 3, 4	TR67609|c0_g1_i5, TR71381|c0_g1_i3, TR71381|c0_g1_i2, TR71381|c0_g1_i1, TR63671|c1_g1_i2, Mj_1_GCCAAT_L005_R1_001_(paired)_trimmed_(paired)_contig_7609, TR63671|c0_g1_i1, TR63671|c1_g1_i1	3	27	11.1111
Steroid hormone biosynthesis	map00140	ec:1.1.1.53 - 20beta)-hydroxysteroid dehydrogenase, ec:2.1.1.6 - O-methyltransferase, ec:1.1.1.146 - dehydrogenase, ec:2.4.1.17 - 1-naphthol glucuronyltransferase	1, 1, 1, 1	scaffold11340, TR73260|c1_g1_i3, TR73030|c1_g1_i7, C968538	4	36	11.1111
Styrene degradation	map00643	ec:3.5.1.4 - acylamidase, ec:4.2.1.84 - hydratase	3, 1	TR16485|c0_g1_i1, TR60439|c0_g1_i7, TR63351|c0_g1_i3, scaffold12506	2	18	11.1111
Glyoxylate and dicarboxylate metabolism	map00630	ec:4.1.1.39 - carboxylase, ec:1.2.3.4 - oxidase, ec:1.17.1.9 - dehydrogenase, ec:3.1.3.18 - phosphatase, ec:1.1.1.37 - dehydrogenase, ec:1.11.1.6 - equilase, ec:2.1.2.1 - hydroxymethyltransferase, ec:6.3.1.2 - synthetase	4, 1, 2, 2, 1, 3, 3, 1	TR73002|c1_g2_i2, Mj_1_GCCAAT_L005_R1_001_(paired)_trimmed_(paired)_contig_93347, TR73002|c0_g1_i1, Mj_1_GCCAAT_L005_R1_001_(paired)_trimmed_(paired)_contig_45970, Mj_1_GCCAAT_L005_R1_001_(paired)_trimmed_(paired)_contig_40156, TR46983|c1_g1_i1, Mj_1_GCCAAT_L005_R1_001_(paired)_trimmed_(paired)_contig_91451, TR65990|c1_g1_i1, C963972, TR61436|c0_g1_i1, Mj_1_GCCAAT_L005_R1_001_(paired)_trimmed_(pa…	8	73	10.9589
Pentose and glucuronate interconversions	map00040	ec:1.1.1.14 - 2-dehydrogenase, ec:3.2.1.15 - pectin depolymerase (ambiguous), ec:5.1.3.1 - 3-epimerase, ec:4.2.2.2 - lyase, ec:1.1.1.10 - reductase, ec:3.1.1.11 - pectin demethoxylase, ec:2.4.1.17 - 1-naphthol glucuronyltransferase	4, 2, 1, 4, 1, 4, 1	TR61795|c0_g1_i5, TR61978|c0_g1_i2, TR61795|c0_g1_i3, Mj_1_GCCAAT_L005_R1_001_(paired)_trimmed_(paired)_contig_10741, Mj_1_GCCAAT_L005_R1_001_(paired)_trimmed_(paired)_contig_94909, TR28771|c0_g1_i1, TR56826|c0_g1_i2, Mj_1_GCCAAT_L005_R1_001_(paired)_trimmed_(paired)_contig_88850, C936276, Mj_1_GCCAAT_L005_R1_001_(paired)_trimmed_(paired)_contig_24005, C920920, C942700, Mj_1_GCCAAT_L005_R1_001_(p…	7	67	10.4478
Pyruvate metabolism	map00620	ec:4.1.1.32 - carboxykinase (GTP), ec:1.2.1.3 - dehydrogenase (NAD+), ec:4.1.1.49 - carboxykinase (ATP), ec:3.1.2.6 - hydrolase, ec:1.1.1.37 - dehydrogenase, ec:4.4.1.5 - lyase, ec:1.1.1.78 - reductase (NADH)	1, 18, 2, 2, 1, 4, 1	Mj_1_GCCAAT_L005_R1_001_(paired)_trimmed_(paired)_contig_1224, TR66779|c3_g1_i1, TR77310|c2_g3_i1, Mj_1_GCCAAT_L005_R1_001_(paired)_trimmed_(paired)_contig_89731, C923530, TR64039|c0_g1_i1, TR79292|c3_g4_i5, TR64039|c0_g1_i3, TR64340|c1_g1_i10, TR77310|c2_g3_i7, TR64340|c2_g3_i4, TR77310|c2_g3_i12, C915615, TR17822|c0_g1_i1, TR72401|c2_g2_i1, TR64039|c0_g1_i5, TR66779|c3_g5_i1, TR79292|c3_g4_i2, …	7	67	10.4478
Galactose metabolism	map00052	ec:2.4.1.67 - galactosyltransferase, ec:2.4.1.82 - galactosyltransferase, ec:3.2.1.20 - maltase, ec:2.4.1.123 - 3-alpha-galactosyltransferase, ec:3.2.1.23 - lactase (ambiguous)	1, 1, 1, 3, 4	TR73972|c1_g1_i2, TR73972|c1_g1_i2, TR67079|c0_g1_i2, TR72029|c0_g1_i6, TR72029|c0_g1_i5, Mj_1_GCCAAT_L005_R1_001_(paired)_trimmed_(paired)_contig_44551, TR63671|c1_g1_i2, Mj_1_GCCAAT_L005_R1_001_(paired)_trimmed_(paired)_contig_7609, TR63671|c0_g1_i1, TR63671|c1_g1_i1	5	48	10.4167
Sulfur metabolism	map00920	ec:3.6.2.1 - adenosine 5-phosphosulfate sulfohydrolase, ec:2.7.7.4 - adenylyltransferase, ec:2.5.1.47 - synthase, ec:2.7.7.5 - adenylyltransferase (ADP), ec:1.8.3.1 - oxidase	1, 3, 10, 1, 1	TR66889|c0_g1_i5, TR54698|c1_g1_i2, C929902, TR54698|c1_g1_i3, TR63833|c0_g1_i2, TR63833|c0_g1_i1, TR63833|c0_g1_i3, TR63833|c0_g1_i6, TR63833|c0_g1_i5, TR63833|c0_g1_i10, TR63833|c0_g1_i11, scaffold11803, TR66111|c4_g2_i2, Mj_1_GCCAAT_L005_R1_001_(paired)_trimmed_(paired)_contig_14105, TR66889|c0_g1_i5, scaffold14018	5	48	10.4167
Tryptophan metabolism	map00380	ec:1.2.1.3 - dehydrogenase (NAD+), ec:3.5.1.4 - acylamidase, ec:4.2.1.84 - hydratase, ec:1.4.3.2 - oxidase, ec:4.2.1.17 - hydratase, ec:1.11.1.6 - equilase	18, 3, 1, 1, 1, 3	TR66779|c3_g1_i1, TR77310|c2_g3_i1, Mj_1_GCCAAT_L005_R1_001_(paired)_trimmed_(paired)_contig_89731, C923530, TR64039|c0_g1_i1, TR79292|c3_g4_i5, TR64039|c0_g1_i3, TR64340|c1_g1_i10, TR77310|c2_g3_i7, TR64340|c2_g3_i4, TR77310|c2_g3_i12, C915615, TR17822|c0_g1_i1, TR72401|c2_g2_i1, TR64039|c0_g1_i5, TR66779|c3_g5_i1, TR79292|c3_g4_i2, TR66779|c3_g5_i5, TR16485|c0_g1_i1, TR60439|c0_g1_i7, TR63351|c…	6	58	10.3448
Glycine, serine and threonine metabolism	map00260	ec:4.4.1.1 - gamma-lyase, ec:4.1.2.5 - aldolase, ec:2.7.2.4 - kinase, ec:1.1.1.1 - dehydrogenase, ec:1.4.3.21 - oxidase, ec:3.1.3.3 - phosphatase, ec:2.1.2.1 - hydroxymethyltransferase	1, 2, 1, 16, 1, 1, 3	TR77103|c1_g1_i2, TR66711|c0_g1_i3, TR66711|c0_g1_i1, Mj_1_GCCAAT_L005_R1_001_(paired)_trimmed_(paired)_contig_5573, scaffold14032, scaffold14033, TR72553|c3_g1_i3, TR76723|c3_g2_i4, TR76723|c3_g3_i5, TR72553|c3_g1_i7, TR57450|c1_g1_i3, TR68882|c2_g1_i10, TR68882|c2_g1_i1, TR76723|c3_g5_i1, TR50992|c0_g1_i1, TR68882|c2_g1_i4, TR21073|c0_g1_i1, TR72553|c2_g1_i1, TR68882|c2_g1_i2, TR72553|c3_g1_i16…	7	68	10.2941
Geraniol degradation	map00281	ec:4.2.1.17 - hydratase	1	TR75317|c1_g1_i4	1	10	10
Zeatin biosynthesis	map00908	ec:2.5.1.27 - dimethylallyltransferase	1	TR78328|c3_g2_i2	1	10	10
Methane metabolism	map00680	ec:1.2.1.46 - dehydrogenase, ec:1.17.1.9 - dehydrogenase, ec:3.1.3.11 - hexose diphosphatase, ec:1.1.1.37 - dehydrogenase, ec:1.1.3.13 - oxidase, ec:3.1.3.3 - phosphatase, ec:2.1.2.1 - hydroxymethyltransferase, ec:4.1.2.13 - aldolase	1, 2, 1, 1, 7, 1, 3, 2	Mj_1_GCCAAT_L005_R1_001_(paired)_trimmed_(paired)_contig_89731, TR46983|c1_g1_i1, Mj_1_GCCAAT_L005_R1_001_(paired)_trimmed_(paired)_contig_91451, TR47875|c0_g1_i2, TR61436|c0_g1_i1, TR58462|c0_g1_i2, Mj_1_GCCAAT_L005_R1_001_(paired)_trimmed_(paired)_contig_48499, Mj_1_GCCAAT_L005_R1_001_(paired)_trimmed_(paired)_contig_91087, TR71876|c0_g1_i1, TR74647|c1_g1_i3, TR74647|c1_g1_i1, C943636, Mj_1_GCC…	8	82	9.7561
Aminoacyl-tRNA biosynthesis	map00970	ec:6.3.5.7 - synthase (glutamine-hydrolysing), ec:6.1.1.10 - ligase, ec:6.1.1.21 - ligase	2, 3, 2	TR73170|c4_g2_i2, TR73170|c4_g2_i3, TR22385|c0_g1_i1, Mj_1_GCCAAT_L005_R1_001_(paired)_trimmed_(paired)_contig_42143, TR46134|c0_g1_i2, TR74285|c0_g1_i1, TR75150|c0_g1_i1	3	31	9.67742
Glycosaminoglycan biosynthesis - heparan sulfate / heparin	map00534	ec:2.4.1.224 - 4-alpha-N-acetylglucosaminyltransferase	1	Mj_1_GCCAAT_L005_R1_001_(paired)_trimmed_(paired)_contig_9224	1	11	9.09091
Pentose phosphate pathway	map00030	ec:5.1.3.1 - 3-epimerase, ec:3.1.3.11 - hexose diphosphatase, ec:5.3.1.6 - isomerase, ec:2.2.1.1 - glycolaldehydetransferase, ec:4.1.2.13 - aldolase	1, 1, 3, 1, 2	TR56826|c0_g1_i2, TR47875|c0_g1_i2, Mj_1_GCCAAT_L005_R1_001_(paired)_trimmed_(paired)_contig_13590, TR56838|c2_g1_i1, TR69222|c3_g2_i1, TR58893|c1_g2_i2, TR72428|c1_g1_i5, TR72428|c0_g1_i2	5	55	9.09091
Ascorbate and aldarate metabolism	map00053	ec:1.11.1.11 - peroxidase, ec:1.2.1.3 - dehydrogenase (NAD+), ec:1.1.3.8 - oxidase, ec:2.4.1.17 - 1-naphthol glucuronyltransferase	1, 18, 1, 1	Mj_1_GCCAAT_L005_R1_001_(paired)_trimmed_(paired)_contig_91897, TR66779|c3_g1_i1, TR77310|c2_g3_i1, Mj_1_GCCAAT_L005_R1_001_(paired)_trimmed_(paired)_contig_89731, C923530, TR64039|c0_g1_i1, TR79292|c3_g4_i5, TR64039|c0_g1_i3, TR64340|c1_g1_i10, TR77310|c2_g3_i7, TR64340|c2_g3_i4, TR77310|c2_g3_i12, C915615, TR17822|c0_g1_i1, TR72401|c2_g2_i1, TR64039|c0_g1_i5, TR66779|c3_g5_i1, TR79292|c3_g4_i2,…	4	46	8.69565
Nicotinate and nicotinamide metabolism	map00760	ec:3.2.2.1 - nucleosidase, ec:2.7.7.1 - adenylyltransferase, ec:2.7.1.23 - kinase, ec:6.3.5.1 - synthase (glutamine-hydrolysing), ec:2.7.7.18 - adenylyltransferase	1, 1, 1, 2, 1	TR64269|c0_g1_i1, TR62237|c0_g2_i3, scaffold13660, Mj_1_GCCAAT_L005_R1_001_(paired)_trimmed_(paired)_contig_19266, TR74684|c3_g1_i4, TR62237|c0_g2_i3	5	59	8.47458
Caffeine metabolism	map00232	ec:2.3.1.5 - N-acetyltransferase	5	Mj_1_GCCAAT_L005_R1_001_(paired)_trimmed_(paired)_contig_90820, TR50736|c0_g1_i1, TR67819|c0_g1_i1, TR53089|c3_g2_i1, TR57624|c0_g1_i1	1	12	8.33333
Thiamine metabolism	map00730	ec:3.6.1.15 - phosphatase, ec:3.1.3.2 - phosphatase	28, 1	TR61383|c0_g1_i1, Mj_1_GCCAAT_L005_R1_001_(paired)_trimmed_(paired)_contig_20646, Mj_1_GCCAAT_L005_R1_001_(paired)_trimmed_(paired)_contig_9273, TR61383|c0_g1_i3, Mj_1_GCCAAT_L005_R1_001_(paired)_trimmed_(paired)_contig_5649, C944150, TR58089|c1_g1_i1, TR59317|c2_g1_i2, TR64114|c0_g2_i5, Mj_1_GCCAAT_L005_R1_001_(paired)_trimmed_(paired)_contig_48117, Mj_1_GCCAAT_L005_R1_001_(paired)_trimmed_(pair…	2	24	8.33333
Tyrosine metabolism	map00350	ec:2.1.1.6 - O-methyltransferase, ec:1.2.1.5 - dehydrogenase [NAD(P)+], ec:1.1.1.1 - dehydrogenase, ec:1.4.3.2 - oxidase, ec:1.4.3.21 - oxidase	1, 13, 16, 1, 1	TR73260|c1_g1_i3, TR66779|c3_g1_i1, Mj_1_GCCAAT_L005_R1_001_(paired)_trimmed_(paired)_contig_89731, C923530, TR64039|c0_g1_i1, TR79292|c3_g4_i5, TR64039|c0_g1_i3, TR64340|c1_g1_i10, TR64340|c2_g3_i4, C915615, TR17822|c0_g1_i1, TR64039|c0_g1_i5, TR66779|c3_g5_i1, TR66779|c3_g5_i5, scaffold14032, scaffold14033, TR72553|c3_g1_i3, TR76723|c3_g2_i4, TR76723|c3_g3_i5, TR72553|c3_g1_i7, TR57450|c1_g1_i3…	5	61	8.19672
Nitrogen metabolism	map00910	ec:4.2.1.1 - anhydrase, ec:4.2.1.104 - cyanate lyase, ec:6.3.1.2 - synthetase	5, 8, 1	TR66885|c1_g2_i3, TR62042|c0_g1_i4, TR68263|c2_g1_i2, TR66885|c0_g1_i2, TR68263|c2_g1_i4, TR66779|c3_g1_i1, C915615, TR79292|c3_g4_i5, TR84732|c0_g1_i1, TR64340|c1_g1_i10, TR66779|c3_g5_i1, TR64340|c2_g3_i4, TR66779|c3_g5_i5, TR64837|c1_g1_i3	3	37	8.10811
Fructose and mannose metabolism	map00051	ec:1.1.1.14 - 2-dehydrogenase, ec:3.1.3.11 - hexose diphosphatase, ec:5.3.1.6 - isomerase, ec:1.1.1.138 - 2-dehydrogenase (NADP+), ec:1.1.1.67 - 2-dehydrogenase, ec:4.1.2.13 - aldolase	4, 1, 3, 2, 1, 2	TR61795|c0_g1_i5, TR61978|c0_g1_i2, TR61795|c0_g1_i3, Mj_1_GCCAAT_L005_R1_001_(paired)_trimmed_(paired)_contig_10741, TR47875|c0_g1_i2, Mj_1_GCCAAT_L005_R1_001_(paired)_trimmed_(paired)_contig_13590, TR56838|c2_g1_i1, TR69222|c3_g2_i1, C942700, TR50612|c0_g2_i1, C942700, TR72428|c1_g1_i5, TR72428|c0_g1_i2	6	75	8
Vitamin B6 metabolism	map00750	ec:1.4.3.5 - 5'-phosphate synthase, ec:1.1.1.107 - 4-dehydrogenase	1, 1	Mj_1_GCCAAT_L005_R1_001_(paired)_trimmed_(paired)_contig_90590, Mj_1_GCCAAT_L005_R1_001_(paired)_trimmed_(paired)_contig_104877	2	25	8
Histidine metabolism	map00340	ec:1.2.1.3 - dehydrogenase (NAD+), ec:1.2.1.5 - dehydrogenase [NAD(P)+], ec:4.2.1.19 - dehydratase	18, 13, 1	TR66779|c3_g1_i1, TR77310|c2_g3_i1, Mj_1_GCCAAT_L005_R1_001_(paired)_trimmed_(paired)_contig_89731, C923530, TR64039|c0_g1_i1, TR79292|c3_g4_i5, TR64039|c0_g1_i3, TR64340|c1_g1_i10, TR77310|c2_g3_i7, TR64340|c2_g3_i4, TR77310|c2_g3_i12, C915615, TR17822|c0_g1_i1, TR72401|c2_g2_i1, TR64039|c0_g1_i5, TR66779|c3_g5_i1, TR79292|c3_g4_i2, TR66779|c3_g5_i5, TR66779|c3_g1_i1, Mj_1_GCCAAT_L005_R1_001_(pa…	3	38	7.89474
Fatty acid elongation	map00062	ec:4.2.1.17 - hydratase	1	TR75317|c1_g1_i4	1	13	7.69231
Linoleic acid metabolism	map00591	ec:1.13.11.12 - 13S-lipoxygenase	3	TR72444|c0_g1_i1, Mj_1_GCCAAT_L005_R1_001_(paired)_trimmed_(paired)_contig_29488, TR79081|c0_g3_i2	1	13	7.69231
Phenylalanine metabolism	map00360	ec:3.5.1.4 - acylamidase, ec:1.2.1.5 - dehydrogenase [NAD(P)+], ec:1.4.3.2 - oxidase, ec:4.2.1.17 - hydratase, ec:1.4.3.21 - oxidase	3, 13, 1, 1, 1	TR16485|c0_g1_i1, TR60439|c0_g1_i7, TR63351|c0_g1_i3, TR66779|c3_g1_i1, Mj_1_GCCAAT_L005_R1_001_(paired)_trimmed_(paired)_contig_89731, C923530, TR64039|c0_g1_i1, TR79292|c3_g4_i5, TR64039|c0_g1_i3, TR64340|c1_g1_i10, TR64340|c2_g3_i4, C915615, TR17822|c0_g1_i1, TR64039|c0_g1_i5, TR66779|c3_g5_i1, TR66779|c3_g5_i5, Mj_1_GCCAAT_L005_R1_001_(paired)_trimmed_(paired)_contig_11851, TR75317|c1_g1_i4, …	5	66	7.57576
Lysine degradation	map00310	ec:1.2.1.3 - dehydrogenase (NAD+), ec:1.5.1.10 - dehydrogenase (NADP+, L-glutamate-forming), ec:4.2.1.17 - hydratase, ec:1.5.1.8 - dehydrogenase (NADP+, L-lysine-forming)	18, 4, 1, 4	TR66779|c3_g1_i1, TR77310|c2_g3_i1, Mj_1_GCCAAT_L005_R1_001_(paired)_trimmed_(paired)_contig_89731, C923530, TR64039|c0_g1_i1, TR79292|c3_g4_i5, TR64039|c0_g1_i3, TR64340|c1_g1_i10, TR77310|c2_g3_i7, TR64340|c2_g3_i4, TR77310|c2_g3_i12, C915615, TR17822|c0_g1_i1, TR72401|c2_g2_i1, TR64039|c0_g1_i5, TR66779|c3_g5_i1, TR79292|c3_g4_i2, TR66779|c3_g5_i5, TR72888|c0_g2_i5, TR72888|c0_g2_i4, TR72888|c…	4	53	7.54717
Polyketide sugar unit biosynthesis	map00523	ec:4.2.1.46 - 4,6-dehydratase, ec:1.1.1.133 - reductase	1, 1	TR72456|c0_g1_i2, TR72456|c0_g1_i2	2	27	7.40741
Tropane, piperidine and pyridine alkaloid biosynthesis	map00960	ec:2.1.1.53 - N-methyltransferase, ec:1.4.3.21 - oxidase	3, 1	Mj_1_GCCAAT_L005_R1_001_(paired)_trimmed_(paired)_contig_4228, TR65254|c0_g1_i2, TR65254|c0_g1_i1, Mj_1_GCCAAT_L005_R1_001_(paired)_trimmed_(paired)_contig_11851	2	27	7.40741
Acarbose and validamycin biosynthesis	map00525	ec:4.2.1.46 - 4,6-dehydratase	1	TR72456|c0_g1_i2	1	14	7.14286
Lysine biosynthesis	map00300	ec:1.5.1.10 - dehydrogenase (NADP+, L-glutamate-forming), ec:2.7.2.4 - kinase	4, 1	TR72888|c0_g2_i5, TR72888|c0_g2_i4, TR72888|c1_g2_i1, C949188, Mj_1_GCCAAT_L005_R1_001_(paired)_trimmed_(paired)_contig_5573	2	28	7.14286
Valine, leucine and isoleucine biosynthesis	map00290	ec:2.6.1.42 - transaminase	6	TR71909|c0_g1_i1, TR71909|c0_g1_i3, TR71909|c0_g1_i2, TR70629|c0_g1_i3, TR70629|c0_g1_i2, TR68904|c0_g2_i1	1	14	7.14286
Glucosinolate biosynthesis	map00966	ec:2.6.1.42 - transaminase	6	TR71909|c0_g1_i1, TR71909|c0_g1_i3, TR71909|c0_g1_i2, TR70629|c0_g1_i3, TR70629|c0_g1_i2, TR68904|c0_g2_i1	1	15	6.66667
Glycosaminoglycan degradation	map00531	ec:3.2.1.23 - lactase (ambiguous)	4	TR63671|c1_g1_i2, Mj_1_GCCAAT_L005_R1_001_(paired)_trimmed_(paired)_contig_7609, TR63671|c0_g1_i1, TR63671|c1_g1_i1	1	15	6.66667
Pantothenate and CoA biosynthesis	map00770	ec:1.2.1.3 - dehydrogenase (NAD+), ec:2.6.1.42 - transaminase	18, 6	TR66779|c3_g1_i1, TR77310|c2_g3_i1, Mj_1_GCCAAT_L005_R1_001_(paired)_trimmed_(paired)_contig_89731, C923530, TR64039|c0_g1_i1, TR79292|c3_g4_i5, TR64039|c0_g1_i3, TR64340|c1_g1_i10, TR77310|c2_g3_i7, TR64340|c2_g3_i4, TR77310|c2_g3_i12, C915615, TR17822|c0_g1_i1, TR72401|c2_g2_i1, TR64039|c0_g1_i5, TR66779|c3_g5_i1, TR79292|c3_g4_i2, TR66779|c3_g5_i5, TR71909|c0_g1_i1, TR71909|c0_g1_i3, TR71909|c…	2	31	6.45161
Purine metabolism	map00230	ec:3.6.1.15 - phosphatase, ec:4.6.1.2 - cyclase, ec:3.2.2.1 - nucleosidase, ec:3.2.2.2 - nucleosidase, ec:2.7.4.6 - kinase, ec:2.7.7.4 - adenylyltransferase, ec:3.5.4.6 - deaminase	28, 1, 1, 1, 1, 3, 1	TR61383|c0_g1_i1, Mj_1_GCCAAT_L005_R1_001_(paired)_trimmed_(paired)_contig_20646, Mj_1_GCCAAT_L005_R1_001_(paired)_trimmed_(paired)_contig_9273, TR61383|c0_g1_i3, Mj_1_GCCAAT_L005_R1_001_(paired)_trimmed_(paired)_contig_5649, C944150, TR58089|c1_g1_i1, TR59317|c2_g1_i2, TR64114|c0_g2_i5, Mj_1_GCCAAT_L005_R1_001_(paired)_trimmed_(paired)_contig_48117, Mj_1_GCCAAT_L005_R1_001_(paired)_trimmed_(pair…	7	109	6.42202
Anthocyanin biosynthesis	map00942	ec:2.4.1.115 - 3-O-glucosyltransferase	3	Mj_1_GCCAAT_L005_R1_001_(paired)_trimmed_(paired)_contig_15379, scaffold13584, TR72761|c4_g2_i1	1	16	6.25
Alanine, aspartate and glutamate metabolism	map00250	ec:1.4.3.2 - oxidase, ec:6.3.5.4 - synthase (glutamine-hydrolysing), ec:6.3.1.2 - synthetase	1, 3, 1	Mj_1_GCCAAT_L005_R1_001_(paired)_trimmed_(paired)_contig_11851, Mj_1_GCCAAT_L005_R1_001_(paired)_trimmed_(paired)_contig_13903, scaffold14171, TR74832|c1_g1_i1, TR64837|c1_g1_i3	3	50	6
Carbon fixation pathways in prokaryotes	map00720	ec:1.1.1.37 - dehydrogenase, ec:4.2.1.17 - hydratase, ec:1.1.1.42 - dehydrogenase (NADP+)	1, 1, 1	TR61436|c0_g1_i1, TR75317|c1_g1_i4, TR67941|c0_g2_i1	3	50	6
Diterpenoid biosynthesis	map00904	ec:1.14.11.15 - 3beta-dioxygenase, ec:1.14.14.106 - 13alpha-hydroxylase, ec:4.2.3.19 - synthase	1, 1, 3	Mj_1_GCCAAT_L005_R1_001_(paired)_trimmed_(paired)_contig_40179, TR66311|c1_g1_i2, TR79136|c1_g1_i1, C925626, TR79136|c1_g1_i10	3	50	6
Aminobenzoate degradation	map00627	ec:3.5.1.4 - acylamidase, ec:4.2.1.84 - hydratase, ec:4.2.1.17 - hydratase	3, 1, 1	TR16485|c0_g1_i1, TR60439|c0_g1_i7, TR63351|c0_g1_i3, scaffold12506, TR75317|c1_g1_i4	3	51	5.88235
Folate biosynthesis	map00790	ec:3.4.19.9 - gamma-glutamyl hydrolase, ec:1.1.1.184 - reductase (NADPH), ec:2.8.1.12 - synthase	1, 2, 1	Mj_1_GCCAAT_L005_R1_001_(paired)_trimmed_(paired)_contig_5183, C942700, scaffold14033, TR68284|c0_g1_i1	3	51	5.88235
Arginine and proline metabolism	map00330	ec:1.2.1.3 - dehydrogenase (NAD+), ec:3.5.1.4 - acylamidase, ec:4.1.1.19 - decarboxylase, ec:2.5.1.16 - synthase, ec:4.1.1.50 - decarboxylase	18, 3, 3, 3, 2	TR66779|c3_g1_i1, TR77310|c2_g3_i1, Mj_1_GCCAAT_L005_R1_001_(paired)_trimmed_(paired)_contig_89731, C923530, TR64039|c0_g1_i1, TR79292|c3_g4_i5, TR64039|c0_g1_i3, TR64340|c1_g1_i10, TR77310|c2_g3_i7, TR64340|c2_g3_i4, TR77310|c2_g3_i12, C915615, TR17822|c0_g1_i1, TR72401|c2_g2_i1, TR64039|c0_g1_i5, TR66779|c3_g5_i1, TR79292|c3_g4_i2, TR66779|c3_g5_i5, TR16485|c0_g1_i1, TR60439|c0_g1_i7, TR63351|c…	5	86	5.81395
Isoquinoline alkaloid biosynthesis	map00950	ec:1.14.14.102 - 3'-monooxygenase, ec:1.4.3.2 - oxidase, ec:1.4.3.21 - oxidase	3, 1, 1	TR52109|c0_g1_i3, TR65936|c0_g1_i1, TR65936|c0_g1_i4, Mj_1_GCCAAT_L005_R1_001_(paired)_trimmed_(paired)_contig_11851, Mj_1_GCCAAT_L005_R1_001_(paired)_trimmed_(paired)_contig_11851	3	55	5.45455
Indole alkaloid biosynthesis	map00901	ec:3.1.1.78 - esterase	5	TR76505|c0_g3_i1, TR75799|c0_g2_i1, TR76505|c0_g3_i4, TR75799|c0_g2_i2, TR76505|c0_g4_i1	1	19	5.26316
Peptidoglycan biosynthesis	map00550	ec:1.3.1.98 - dehydrogenase	2	TR48396|c1_g1_i1, Mj_1_GCCAAT_L005_R1_001_(paired)_trimmed_(paired)_contig_91176	1	19	5.26316
Amino sugar and nucleotide sugar metabolism	map00520	ec:3.2.1.55 - end alpha-L-arabinofuranosidase, ec:5.4.99.30 - mutase, ec:3.2.1.37 - 1,4-beta-xylosidase, ec:1.3.1.98 - dehydrogenase, ec:4.2.1.76 - 4,6-dehydratase, ec:3.2.1.14 - ChiC	3, 1, 1, 2, 1, 1	Mj_1_GCCAAT_L005_R1_001_(paired)_trimmed_(paired)_contig_101622, TR74776|c0_g1_i2, Mj_1_GCCAAT_L005_R1_001_(paired)_trimmed_(paired)_contig_11294, TR45384|c0_g1_i3, Mj_1_GCCAAT_L005_R1_001_(paired)_trimmed_(paired)_contig_101622, TR48396|c1_g1_i1, Mj_1_GCCAAT_L005_R1_001_(paired)_trimmed_(paired)_contig_91176, TR72456|c0_g1_i2, Mj_1_GCCAAT_L005_R1_001_(paired)_trimmed_(paired)_contig_22404	6	119	5.04202
Biotin metabolism	map00780	ec:1.1.1.100 - reductase	1	TR65453|c0_g1_i2	1	20	5
Caprolactam degradation	map00930	ec:4.2.1.17 - hydratase	1	TR75317|c1_g1_i4	1	21	4.7619
Chlorocyclohexane and chlorobenzene degradation	map00361	ec:3.1.1.45 - maleylacetate enol-lactonase	1	scaffold12295	1	21	4.7619
Various types of N-glycan biosynthesis	map00513	ec:3.2.1.113 - 1,2-alpha-mannosidase	1	TR79464|c1_g1_i4	1	23	4.34783
One carbon pool by folate	map00670	ec:2.1.2.1 - hydroxymethyltransferase	3	TR63245|c0_g1_i1, TR27507|c0_g1_i1, TR63245|c1_g1_i3	1	24	4.16667
Steroid biosynthesis	map00100	ec:1.14.14.17 - monooxygenase	1	TR41297|c0_g1_i1	1	25	4
Toluene degradation	map00623	ec:3.1.1.45 - maleylacetate enol-lactonase	1	scaffold12295	1	25	4
Propanoate metabolism	map00640	ec:3.1.2.4 - hydrolase, ec:4.2.1.17 - hydratase	1, 1	TR75317|c1_g1_i4, TR75317|c1_g1_i4	2	55	3.63636
Arginine biosynthesis	map00220	ec:6.3.1.2 - synthetase	1	TR64837|c1_g1_i3	1	28	3.57143
Riboflavin metabolism	map00740	ec:3.1.3.2 - phosphatase	1	TR72825|c0_g1_i4	1	28	3.57143
N-Glycan biosynthesis	map00510	ec:3.2.1.113 - 1,2-alpha-mannosidase	1	TR79464|c1_g1_i4	1	34	2.94118
Porphyrin and chlorophyll metabolism	map00860	ec:1.3.1.33 - reductase, ec:1.14.14.18 - oxygenase (biliverdin-producing), ec:2.4.1.17 - 1-naphthol glucuronyltransferase	1, 1, 1	Mj_1_GCCAAT_L005_R1_001_(paired)_trimmed_(paired)_contig_21040, Mj_1_GCCAAT_L005_R1_001_(paired)_trimmed_(paired)_contig_73445, C968538	3	105	2.85714
Carotenoid biosynthesis	map00906	ec:1.14.14.137 - acid 8'-hydroxylase	4	TR62421|c0_g1_i4, TR62421|c0_g1_i5, TR62421|c0_g1_i7, TR62421|c0_g1_i9	1	37	2.7027
Phenylalanine, tyrosine and tryptophan biosynthesis	map00400	ec:1.4.3.2 - oxidase	1	Mj_1_GCCAAT_L005_R1_001_(paired)_trimmed_(paired)_contig_11851	1	39	2.5641
Ubiquinone and other terpenoid-quinone biosynthesis	map00130	ec:6.2.1.26 - ligase	3	TR71184|c0_g1_i1, C970964, TR71159|c0_g1_i2	1	40	2.5
Butanoate metabolism	map00650	ec:4.2.1.17 - hydratase	1	TR75317|c1_g1_i4	1	55	1.81818
Pyrimidine metabolism	map00240	ec:2.7.4.6 - kinase	1	TR38272|c0_g2_i1	1	65	1.53846
Benzoate degradation	map00362	ec:4.2.1.17 - hydratase	1	TR75317|c1_g1_i4	1	69	1.44928
Sesquiterpenoid and triterpenoid biosynthesis	map00909	ec:1.14.14.17 - monooxygenase	1	TR41297|c0_g1_i1	1	80	1.25

## Sheet: TransM16_KEGG
Table S13 KEGG pathway mapping of transcript modules sharing high correlation coefficient (PCC > 0.7) with the identified metabolite modules in Mallotus japonicus.
Pathway	Pathway ID	Enzyme	#Seqs of Enzyme	Seqs	#Enzs in Pathway	#KEGG Enzymes	Ratio of enzymes in our sample in kegg enzymes (%)
Flavonoid biosynthesis	map00941	ec:1.14.20.4 - synthase, ec:1.3.1.77 - reductase [(2R,3R)-flavan-3-ol-forming], ec:1.1.1.219 - 4-reductase, ec:1.14.11.9 - 3-dioxygenase, ec:1.14.20.6 - synthase, ec:2.3.1.170 - synthase, ec:2.1.1.104 - O-methyltransferase	1, 5, 2, 1, 1, 1, 1	TR56467|c0_g1_i1, TR59767|c0_g1_i1, scaffold11774, TR59767|c0_g1_i2, TR60026|c0_g1_i3, TR60026|c0_g1_i2, TR78823|c0_g2_i3, TR78823|c0_g2_i4, TR64327|c0_g1_i1, TR64327|c0_g1_i1, TR62849|c0_g1_i2, TR60675|c1_g1_i1	7	22	31.8182
Drug metabolism - cytochrome P450	map00982	ec:2.5.1.18 - transferase, ec:1.14.14.1 - monooxygenase	4, 3	TR76786|c0_g4_i1, TR76786|c0_g4_i3, TR75504|c0_g7_i2, TR76786|c0_g4_i5, TR68747|c0_g1_i1, Mj_1_GCCAAT_L005_R1_001_(paired)_trimmed_(paired)_contig_46128, TR43053|c0_g2_i1	2	8	25
Metabolism of xenobiotics by cytochrome P450	map00980	ec:2.5.1.18 - transferase, ec:1.14.14.1 - monooxygenase	4, 3	TR76786|c0_g4_i1, TR76786|c0_g4_i3, TR75504|c0_g7_i2, TR76786|c0_g4_i5, TR68747|c0_g1_i1, Mj_1_GCCAAT_L005_R1_001_(paired)_trimmed_(paired)_contig_46128, TR43053|c0_g2_i1	2	10	20
Caffeine metabolism	map00232	ec:2.3.1.5 - N-acetyltransferase, ec:1.14.14.1 - monooxygenase	1, 3	TR50736|c0_g1_i2, TR68747|c0_g1_i1, Mj_1_GCCAAT_L005_R1_001_(paired)_trimmed_(paired)_contig_46128, TR43053|c0_g2_i1	2	12	16.6667
Drug metabolism - other enzymes	map00983	ec:2.5.1.18 - transferase, ec:2.3.1.5 - N-acetyltransferase, ec:3.1.1.1 - ali-esterase	4, 1, 9	TR76786|c0_g4_i1, TR76786|c0_g4_i3, TR75504|c0_g7_i2, TR76786|c0_g4_i5, TR50736|c0_g1_i2, TR57618|c0_g1_i2, TR59653|c0_g1_i1, Mj_1_GCCAAT_L005_R1_001_(paired)_trimmed_(paired)_contig_82448, TR75018|c0_g1_i1, Mj_1_GCCAAT_L005_R1_001_(paired)_trimmed_(paired)_contig_20320, TR75018|c0_g1_i2, TR68304|c0_g1_i2, TR68304|c0_g1_i3, TR64973|c0_g1_i1	3	18	16.6667
Phenylpropanoid biosynthesis	map00940	ec:1.2.1.68 - dehydrogenase, ec:1.11.1.7 - lactoperoxidase, ec:2.1.1.104 - O-methyltransferase, ec:2.1.1.146 - O-methyltransferase	2, 5, 1, 1	TR72401|c2_g2_i4, TR72401|c2_g2_i3, TR72100|c0_g1_i1, Mj_1_GCCAAT_L005_R1_001_(paired)_trimmed_(paired)_contig_50182, TR66082|c3_g2_i1, Mj_1_GCCAAT_L005_R1_001_(paired)_trimmed_(paired)_contig_2587, TR64537|c0_g1_i1, TR60675|c1_g1_i1, TR73260|c1_g1_i5	4	30	13.3333
Glycerolipid metabolism	map00561	ec:1.2.1.3 - dehydrogenase (NAD+), ec:3.1.1.3 - lipase, ec:2.3.1.15 - 1-O-acyltransferase, ec:2.7.1.107 - kinase (ATP), ec:3.1.1.26 - galactolipid lipase	1, 1, 1, 1, 1	TR72401|c2_g2_i4, Mj_1_GCCAAT_L005_R1_001_(paired)_trimmed_(paired)_contig_20320, TR69431|c3_g1_i1, TR60037|c0_g1_i1, Mj_1_GCCAAT_L005_R1_001_(paired)_trimmed_(paired)_contig_20320	5	39	12.8205
Citrate cycle (TCA cycle)	map00020	ec:1.1.1.37 - dehydrogenase, ec:4.1.1.32 - carboxykinase (GTP), ec:4.1.1.49 - carboxykinase (ATP)	2, 1, 5	Mj_1_GCCAAT_L005_R1_001_(paired)_trimmed_(paired)_contig_7400, C960568, Mj_1_GCCAAT_L005_R1_001_(paired)_trimmed_(paired)_contig_14095, TR73014|c3_g2_i6, Mj_1_GCCAAT_L005_R1_001_(paired)_trimmed_(paired)_contig_14095, TR71488|c1_g10_i4, TR73014|c3_g2_i7, TR73014|c3_g2_i3	3	25	12
Fatty acid biosynthesis	map00061	ec:2.3.1.85 - synthase system, ec:3.1.2.14 - hydrolase	1, 1	TR62385|c0_g1_i1, TR62385|c0_g1_i1	2	17	11.7647
Other glycan degradation	map00511	ec:3.2.1.24 - alpha-D-mannosidase	2	TR63544|c0_g1_i2, TR60818|c2_g1_i3	1	9	11.1111
Fatty acid degradation	map00071	ec:1.14.15.3 - 1-monooxygenase, ec:1.2.1.3 - dehydrogenase (NAD+), ec:1.14.14.1 - monooxygenase	2, 1, 3	TR68747|c0_g1_i1, Mj_1_GCCAAT_L005_R1_001_(paired)_trimmed_(paired)_contig_46128, TR72401|c2_g2_i4, TR68747|c0_g1_i1, Mj_1_GCCAAT_L005_R1_001_(paired)_trimmed_(paired)_contig_46128, TR43053|c0_g2_i1	3	29	10.3448
Isoquinoline alkaloid biosynthesis	map00950	ec:1.4.3.21 - oxidase, ec:1.1.1.247 - reductase (NADPH), ec:2.3.1.150 - 7-O-acetyltransferase, ec:1.14.14.102 - 3'-monooxygenase, ec:1.21.3.3 - oxidase	3, 1, 1, 2, 3	C973486, TR54008|c0_g1_i1, TR54008|c0_g1_i2, TR62849|c0_g1_i2, Mj_1_GCCAAT_L005_R1_001_(paired)_trimmed_(paired)_contig_49121, TR52109|c0_g1_i4, TR43053|c0_g2_i1, Mj_1_GCCAAT_L005_R1_001_(paired)_trimmed_(paired)_contig_52613, TR75803|c1_g1_i1, C968368	5	55	9.09091
Oxidative phosphorylation	map00190	ec:3.6.1.1 - diphosphatase	3	TR74750|c1_g1_i1, TR67768|c2_g2_i7, TR72766|c0_g1_i3	1	11	9.09091
alpha-Linolenic acid metabolism	map00592	ec:3.1.1.32 - A1	1	Mj_1_GCCAAT_L005_R1_001_(paired)_trimmed_(paired)_contig_20320	1	12	8.33333
Stilbenoid, diarylheptanoid and gingerol biosynthesis	map00945	ec:2.1.1.104 - O-methyltransferase	1	TR60675|c1_g1_i1	1	12	8.33333
Thiamine metabolism	map00730	ec:3.6.1.15 - phosphatase, ec:2.8.1.4 - uracil 4-sulfurtransferase	5, 1	TR55954|c0_g1_i1, TR61521|c0_g1_i1, TR65110|c0_g2_i2, TR65110|c1_g1_i4, Mj_1_GCCAAT_L005_R1_001_(paired)_trimmed_(paired)_contig_8595, TR60077|c0_g1_i3	2	24	8.33333
Nitrogen metabolism	map00910	ec:1.7.1.1 - reductase (NADH), ec:1.13.12.16 - monooxygenase, ec:1.7.1.2 - reductase [NAD(P)H]	2, 1, 2	TR47557|c0_g1_i1, Mj_1_GCCAAT_L005_R1_001_(paired)_trimmed_(paired)_contig_10355, TR73602|c0_g2_i2, TR47557|c0_g1_i1, Mj_1_GCCAAT_L005_R1_001_(paired)_trimmed_(paired)_contig_10355	3	37	8.10811
Carbon fixation in photosynthetic organisms	map00710	ec:1.1.1.37 - dehydrogenase, ec:4.1.1.49 - carboxykinase (ATP)	2, 5	Mj_1_GCCAAT_L005_R1_001_(paired)_trimmed_(paired)_contig_7400, C960568, TR73014|c3_g2_i6, Mj_1_GCCAAT_L005_R1_001_(paired)_trimmed_(paired)_contig_14095, TR71488|c1_g10_i4, TR73014|c3_g2_i7, TR73014|c3_g2_i3	2	25	8
Linoleic acid metabolism	map00591	ec:1.14.14.1 - monooxygenase	3	TR68747|c0_g1_i1, Mj_1_GCCAAT_L005_R1_001_(paired)_trimmed_(paired)_contig_46128, TR43053|c0_g2_i1	1	13	7.69231
Riboflavin metabolism	map00740	ec:3.5.4.25 - cyclohydrolase II, ec:4.1.99.12 - synthase	3, 3	TR79730|c1_g1_i1, TR79730|c1_g1_i5, scaffold14572, TR79730|c1_g1_i1, TR79730|c1_g1_i5, scaffold14572	2	28	7.14286
Glycolysis / Gluconeogenesis	map00010	ec:4.1.1.32 - carboxykinase (GTP), ec:1.2.1.3 - dehydrogenase (NAD+), ec:4.1.1.49 - carboxykinase (ATP)	1, 1, 5	Mj_1_GCCAAT_L005_R1_001_(paired)_trimmed_(paired)_contig_14095, TR72401|c2_g2_i4, TR73014|c3_g2_i6, Mj_1_GCCAAT_L005_R1_001_(paired)_trimmed_(paired)_contig_14095, TR71488|c1_g10_i4, TR73014|c3_g2_i7, TR73014|c3_g2_i3	3	47	6.38298
Anthocyanin biosynthesis	map00942	ec:2.4.1.115 - 3-O-glucosyltransferase	3	TR57059|c0_g1_i2, TR78701|c0_g1_i9, TR62799|c0_g2_i1	1	16	6.25
Chloroalkane and chloroalkene degradation	map00625	ec:1.2.1.3 - dehydrogenase (NAD+)	1	TR72401|c2_g2_i4	1	16	6.25
Limonene and pinene degradation	map00903	ec:1.2.1.3 - dehydrogenase (NAD+)	1	TR72401|c2_g2_i4	1	16	6.25
Pyruvate metabolism	map00620	ec:1.1.1.37 - dehydrogenase, ec:4.1.1.32 - carboxykinase (GTP), ec:1.2.1.3 - dehydrogenase (NAD+), ec:4.1.1.49 - carboxykinase (ATP)	2, 1, 1, 5	Mj_1_GCCAAT_L005_R1_001_(paired)_trimmed_(paired)_contig_7400, C960568, Mj_1_GCCAAT_L005_R1_001_(paired)_trimmed_(paired)_contig_14095, TR72401|c2_g2_i4, TR73014|c3_g2_i6, Mj_1_GCCAAT_L005_R1_001_(paired)_trimmed_(paired)_contig_14095, TR71488|c1_g10_i4, TR73014|c3_g2_i7, TR73014|c3_g2_i3	4	67	5.97015
Glyoxylate and dicarboxylate metabolism	map00630	ec:3.5.1.9 - kynurenine formamidase, ec:3.1.3.18 - phosphatase, ec:1.1.1.37 - dehydrogenase, ec:1.2.3.4 - oxidase	1, 1, 2, 3	TR68123|c0_g2_i1, TR65990|c1_g1_i2, Mj_1_GCCAAT_L005_R1_001_(paired)_trimmed_(paired)_contig_7400, C960568, TR48591|c0_g1_i2, TR64339|c0_g2_i1, TR56683|c0_g1_i3	4	73	5.47945
beta-Alanine metabolism	map00410	ec:1.4.3.21 - oxidase, ec:1.2.1.3 - dehydrogenase (NAD+)	3, 1	C973486, TR54008|c0_g1_i1, TR54008|c0_g1_i2, TR72401|c2_g2_i4	2	37	5.40541
Cysteine and methionine metabolism	map00270	ec:1.1.1.37 - dehydrogenase, ec:5.3.1.23 - isomerase, ec:4.4.1.14 - synthase, ec:2.3.1.30 - O-acetyltransferase	2, 1, 1, 2	Mj_1_GCCAAT_L005_R1_001_(paired)_trimmed_(paired)_contig_7400, C960568, TR71905|c1_g6_i1, TR65015|c0_g1_i1, Mj_1_GCCAAT_L005_R1_001_(paired)_trimmed_(paired)_contig_18028, TR74006|c0_g1_i1	4	76	5.26316
Peptidoglycan biosynthesis	map00550	ec:1.3.1.98 - dehydrogenase	2	Mj_1_GCCAAT_L005_R1_001_(paired)_trimmed_(paired)_contig_52613, C968368	1	19	5.26316
Tryptophan metabolism	map00380	ec:3.5.1.9 - kynurenine formamidase, ec:1.2.1.3 - dehydrogenase (NAD+), ec:1.14.14.1 - monooxygenase	1, 1, 3	TR68123|c0_g2_i1, TR72401|c2_g2_i4, TR68747|c0_g1_i1, Mj_1_GCCAAT_L005_R1_001_(paired)_trimmed_(paired)_contig_46128, TR43053|c0_g2_i1	3	58	5.17241
Glycerophospholipid metabolism	map00564	ec:2.3.1.15 - 1-O-acyltransferase, ec:2.7.1.107 - kinase (ATP), ec:3.1.1.32 - A1	1, 1, 1	TR69431|c3_g1_i1, TR60037|c0_g1_i1, Mj_1_GCCAAT_L005_R1_001_(paired)_trimmed_(paired)_contig_20320	3	62	4.83871
Caprolactam degradation	map00930	ec:1.14.15.3 - 1-monooxygenase	2	TR68747|c0_g1_i1, Mj_1_GCCAAT_L005_R1_001_(paired)_trimmed_(paired)_contig_46128	1	21	4.7619
Various types of N-glycan biosynthesis	map00513	ec:3.2.1.113 - 1,2-alpha-mannosidase	2	TR63544|c0_g1_i2, TR60818|c2_g1_i3	1	23	4.34783
Vitamin B6 metabolism	map00750	ec:1.1.1.65 - 4-dehydrogenase	1	TR76774|c0_g4_i3	1	25	4
Folate biosynthesis	map00790	ec:3.5.4.25 - cyclohydrolase II, ec:3.4.19.9 - gamma-glutamyl hydrolase	3, 1	TR79730|c1_g1_i1, TR79730|c1_g1_i5, scaffold14572, TR67849|c0_g1_i3	2	51	3.92157
Starch and sucrose metabolism	map00500	ec:3.2.1.1 - glycogenase, ec:3.2.1.4 - endo-1,4-beta-D-glucanase, ec:2.4.1.12 - synthase (UDP-forming)	1, 1, 2	TR75422|c1_g1_i6, TR68061|c0_g1_i1, Mj_1_GCCAAT_L005_R1_001_(paired)_trimmed_(paired)_contig_1567, TR57508|c0_g3_i7	3	77	3.8961
Arachidonic acid metabolism	map00590	ec:1.14.14.1 - monooxygenase	3	TR68747|c0_g1_i1, Mj_1_GCCAAT_L005_R1_001_(paired)_trimmed_(paired)_contig_46128, TR43053|c0_g2_i1	1	26	3.84615
Tropane, piperidine and pyridine alkaloid biosynthesis	map00960	ec:1.4.3.21 - oxidase	3	C973486, TR54008|c0_g1_i1, TR54008|c0_g1_i2	1	27	3.7037
Lysine biosynthesis	map00300	ec:1.17.1.8 - reductase	1	TR69231|c0_g2_i2	1	28	3.57143
Cyanoamino acid metabolism	map00460	ec:1.14.14.37 - oxime monooxygenase	2	C968312, TR68673|c1_g1_i4	1	29	3.44828
Phosphatidylinositol signaling system	map04070	ec:2.7.1.107 - kinase (ATP)	1	TR60037|c0_g1_i1	1	29	3.44828
Pantothenate and CoA biosynthesis	map00770	ec:1.2.1.3 - dehydrogenase (NAD+)	1	TR72401|c2_g2_i4	1	31	3.22581
Pentose and glucuronate interconversions	map00040	ec:2.7.1.17 - xylulokinase (phosphorylating), ec:3.1.1.11 - pectin demethoxylase	1, 1	TR69145|c0_g1_i1, scaffold1217	2	67	2.98507
N-Glycan biosynthesis	map00510	ec:3.2.1.113 - 1,2-alpha-mannosidase	2	TR63544|c0_g1_i2, TR60818|c2_g1_i3	1	34	2.94118
Steroid hormone biosynthesis	map00140	ec:1.14.14.1 - monooxygenase	3	TR68747|c0_g1_i1, Mj_1_GCCAAT_L005_R1_001_(paired)_trimmed_(paired)_contig_46128, TR43053|c0_g2_i1	1	36	2.77778
Valine, leucine and isoleucine degradation	map00280	ec:1.2.1.3 - dehydrogenase (NAD+)	1	TR72401|c2_g2_i4	1	36	2.77778
Glutathione metabolism	map00480	ec:2.5.1.18 - transferase	4	TR76786|c0_g4_i1, TR76786|c0_g4_i3, TR75504|c0_g7_i2, TR76786|c0_g4_i5	1	38	2.63158
Histidine metabolism	map00340	ec:1.2.1.3 - dehydrogenase (NAD+)	1	TR72401|c2_g2_i4	1	38	2.63158
Arginine and proline metabolism	map00330	ec:1.2.1.3 - dehydrogenase (NAD+), ec:1.14.11.2 - 4-dioxygenase	1, 1	TR72401|c2_g2_i4, scaffold12232	2	86	2.32558
Ascorbate and aldarate metabolism	map00053	ec:1.2.1.3 - dehydrogenase (NAD+)	1	TR72401|c2_g2_i4	1	46	2.17391
Galactose metabolism	map00052	ec:2.4.1.123 - 3-alpha-galactosyltransferase	2	TR73680|c0_g1_i1, TR72029|c0_g1_i4	1	48	2.08333
Sulfur metabolism	map00920	ec:2.3.1.30 - O-acetyltransferase	2	Mj_1_GCCAAT_L005_R1_001_(paired)_trimmed_(paired)_contig_18028, TR74006|c0_g1_i1	1	48	2.08333
Carbon fixation pathways in prokaryotes	map00720	ec:1.1.1.37 - dehydrogenase	2	Mj_1_GCCAAT_L005_R1_001_(paired)_trimmed_(paired)_contig_7400, C960568	1	50	2
Terpenoid backbone biosynthesis	map00900	ec:2.5.1.1 - geranyl-diphosphate synthase	1	TR77753|c0_g1_i2	1	50	2
Aminobenzoate degradation	map00627	ec:1.14.14.1 - monooxygenase	3	TR68747|c0_g1_i1, Mj_1_GCCAAT_L005_R1_001_(paired)_trimmed_(paired)_contig_46128, TR43053|c0_g2_i1	1	51	1.96078
Lysine degradation	map00310	ec:1.2.1.3 - dehydrogenase (NAD+)	1	TR72401|c2_g2_i4	1	53	1.88679
Nicotinate and nicotinamide metabolism	map00760	ec:2.7.1.23 - kinase	1	TR60037|c0_g1_i1	1	59	1.69492
Amino sugar and nucleotide sugar metabolism	map00520	ec:3.2.1.14 - ChiC, ec:1.3.1.98 - dehydrogenase	1, 2	Mj_1_GCCAAT_L005_R1_001_(paired)_trimmed_(paired)_contig_63272, Mj_1_GCCAAT_L005_R1_001_(paired)_trimmed_(paired)_contig_52613, C968368	2	119	1.68067
Tyrosine metabolism	map00350	ec:1.4.3.21 - oxidase	3	C973486, TR54008|c0_g1_i1, TR54008|c0_g1_i2	1	61	1.63934
Phenylalanine metabolism	map00360	ec:1.4.3.21 - oxidase	3	C973486, TR54008|c0_g1_i1, TR54008|c0_g1_i2	1	66	1.51515
Glycine, serine and threonine metabolism	map00260	ec:1.4.3.21 - oxidase	3	C973486, TR54008|c0_g1_i1, TR54008|c0_g1_i2	1	68	1.47059
Methane metabolism	map00680	ec:1.1.1.37 - dehydrogenase	2	Mj_1_GCCAAT_L005_R1_001_(paired)_trimmed_(paired)_contig_7400, C960568	1	82	1.21951
Purine metabolism	map00230	ec:3.6.1.15 - phosphatase	5	TR55954|c0_g1_i1, TR61521|c0_g1_i1, TR65110|c0_g2_i2, TR65110|c1_g1_i4, Mj_1_GCCAAT_L005_R1_001_(paired)_trimmed_(paired)_contig_8595	1	109	0.917431

## Sheet: TransM7_KEGG
Table S13 KEGG pathway mapping of transcript modules sharing high correlation coefficient (PCC > 0.7) with the identified metabolite modules in Mallotus japonicus.
Pathway	Pathway ID	Enzyme	#Seqs of Enzyme	Seqs	#Enzs in Pathway	#KEGG Enzymes	Ratio of enzymes in our sample in kegg enzymes (%)
Drug metabolism - cytochrome P450	map00982	ec:2.5.1.18 - transferase, ec:1.2.3.1 - oxidase, ec:2.4.1.17 - 1-naphthol glucuronyltransferase, ec:1.14.14.1 - monooxygenase	2, 3, 6, 3	Mj_1_GCCAAT_L005_R1_001_(paired)_trimmed_(paired)_contig_5244, TR69895|c0_g1_i2, Mj_1_GCCAAT_L005_R1_001_(paired)_trimmed_(paired)_contig_403, TR76423|c1_g1_i1, TR76423|c1_g1_i9, TR77567|c1_g1_i1, TR55321|c0_g1_i1, TR77567|c1_g1_i2, TR77567|c1_g1_i4, Mj_1_GCCAAT_L005_R1_001_(paired)_trimmed_(paired)_contig_466, TR55751|c0_g1_i1, TR56925|c0_g1_i1, Mj_1_GCCAAT_L005_R1_001_(paired)_trimmed_(paired)_…	4	8	50
Fatty acid biosynthesis	map00061	ec:2.3.1.85 - synthase system, ec:6.4.1.2 - carboxylase, ec:1.1.1.100 - reductase, ec:1.14.19.2 - 9-desaturase, ec:2.3.1.86 - synthase system, ec:2.3.1.39 - S-malonyltransferase, ec:6.2.1.3 - ligase	2, 1, 3, 2, 1, 1, 7	TR65448|c1_g1_i1, TR65448|c0_g1_i3, TR78089|c0_g6_i4, TR65448|c1_g1_i1, TR65448|c0_g1_i3, TR74183|c1_g2_i1, TR60476|c0_g3_i5, TR60898|c1_g3_i2, TR79267|c2_g1_i3, TR70021|c0_g1_i3, TR77739|c0_g1_i13, Mj_1_GCCAAT_L005_R1_001_(paired)_trimmed_(paired)_contig_3201, TR70691|c0_g1_i1, TR78103|c0_g1_i9, TR77739|c0_g1_i9, TR73151|c1_g2_i2, TR78103|c0_g1_i2	7	17	41.1765
Metabolism of xenobiotics by cytochrome P450	map00980	ec:1.1.1.184 - reductase (NADPH), ec:2.5.1.18 - transferase, ec:2.4.1.17 - 1-naphthol glucuronyltransferase, ec:1.14.14.1 - monooxygenase	3, 2, 6, 3	TR62642|c0_g2_i2, scaffold10204, TR62642|c0_g2_i1, Mj_1_GCCAAT_L005_R1_001_(paired)_trimmed_(paired)_contig_5244, TR69895|c0_g1_i2, TR77567|c1_g1_i1, TR55321|c0_g1_i1, TR77567|c1_g1_i2, TR77567|c1_g1_i4, Mj_1_GCCAAT_L005_R1_001_(paired)_trimmed_(paired)_contig_466, TR55751|c0_g1_i1, TR56925|c0_g1_i1, Mj_1_GCCAAT_L005_R1_001_(paired)_trimmed_(paired)_contig_11045, TR58680|c0_g1_i4	4	10	40
Cutin, suberine and wax biosynthesis	map00073	ec:2.3.1.20 - O-acyltransferase, ec:1.2.1.50 - acyl-protein thioester reductase, ec:2.3.1.75 - O-fatty-acyltransferase	2, 2, 1	Mj_1_GCCAAT_L005_R1_001_(paired)_trimmed_(paired)_contig_15548, TR69259|c0_g1_i2, TR76059|c2_g1_i3, TR76592|c1_g1_i3, TR57194|c0_g1_i1	3	8	37.5
alpha-Linolenic acid metabolism	map00592	ec:4.2.1.92 - dehydratase, ec:1.3.1.42 - reductase, ec:1.3.3.6 - oxidase, ec:3.1.1.32 - A1	1, 1, 1, 3	TR77879|c0_g1_i1, TR71885|c0_g1_i1, TR76479|c1_g2_i3, TR79419|c0_g4_i4, TR63798|c0_g1_i6, TR74461|c0_g1_i3	4	12	33.3333
Drug metabolism - other enzymes	map00983	ec:2.7.1.48 - kinase, ec:3.1.1.1 - ali-esterase, ec:1.17.4.1 - reductase, ec:2.5.1.18 - transferase, ec:2.3.1.5 - N-acetyltransferase, ec:2.4.1.17 - 1-naphthol glucuronyltransferase	4, 11, 1, 2, 6, 6	TR64161|c3_g1_i6, TR64161|c3_g1_i2, TR71458|c0_g2_i1, TR75378|c0_g1_i5, TR55826|c0_g1_i1, TR69267|c0_g1_i1, TR79228|c1_g5_i7, Mj_1_GCCAAT_L005_R1_001_(paired)_trimmed_(paired)_contig_3243, Mj_1_GCCAAT_L005_R1_001_(paired)_trimmed_(paired)_contig_15585, TR63798|c0_g1_i6, TR52669|c0_g1_i1, TR51448|c0_g1_i1, TR57989|c0_g1_i6, TR54743|c0_g1_i2, TR67925|c0_g1_i2, TR69942|c0_g2_i4, Mj_1_GCCAAT_L005_R1_…	6	18	33.3333
Lipoic acid metabolism	map00785	ec:2.8.1.8 - synthase	1	TR73644|c1_g1_i4	1	3	33.3333
Other glycan degradation	map00511	ec:3.2.1.25 - mannanase, ec:3.2.1.52 - hexosaminidase, ec:3.2.1.24 - alpha-D-mannosidase	1, 1, 7	Mj_1_GCCAAT_L005_R1_001_(paired)_trimmed_(paired)_contig_1940, Mj_1_GCCAAT_L005_R1_001_(paired)_trimmed_(paired)_contig_4518, Mj_1_GCCAAT_L005_R1_001_(paired)_trimmed_(paired)_contig_3265, TR66419|c0_g1_i5, TR66419|c0_g1_i4, TR69474|c0_g1_i2, TR77925|c0_g2_i3, scaffold14278, scaffold10106	3	9	33.3333
Photosynthesis	map00195	ec:7.1.2.2 - two-sector ATPase	1	Mj_1_GCCAAT_L005_R1_001_(paired)_trimmed_(paired)_contig_2692	1	3	33.3333
Flavonoid biosynthesis	map00941	ec:5.5.1.6 - isomerase, ec:1.1.1.219 - 4-reductase, ec:2.3.1.170 - synthase, ec:1.14.14.81 - 3',5'-hydroxylase, ec:1.14.11.9 - 3-dioxygenase, ec:1.14.20.6 - synthase, ec:2.3.1.74 - synthase	2, 5, 2, 1, 2, 1, 2	TR65373|c0_g1_i2, TR65789|c0_g2_i3, TR61555|c0_g1_i1, Mj_1_GCCAAT_L005_R1_001_(paired)_trimmed_(paired)_contig_1837, TR59201|c0_g1_i2, TR62637|c0_g1_i1, TR77258|c5_g1_i3, TR67602|c0_g1_i1, TR67602|c0_g1_i3, TR68174|c0_g1_i1, Mj_1_GCCAAT_L005_R1_001_(paired)_trimmed_(paired)_contig_2134, TR64882|c0_g2_i1, C961172, TR50767|c0_g1_i1, TR70145|c0_g1_i4	7	22	31.8182
Phosphatidylinositol signaling system	map04070	ec:2.7.1.67 - 4-kinase, ec:3.1.4.11 - phospholipase C, ec:2.7.1.159 - 5/6-kinase, ec:3.1.3.36 - 5-phosphatase, ec:2.7.1.68 - 5-kinase, ec:2.7.11.13 - kinase C, ec:2.7.7.41 - cytidylyltransferase, ec:3.1.3.57 - 1-phosphatase, ec:2.7.1.107 - kinase (ATP)	2, 2, 1, 1, 2, 3, 1, 2, 1	TR78523|c0_g2_i3, C974654, TR69057|c0_g1_i3, TR71447|c2_g2_i3, TR79224|c1_g2_i13, TR73731|c0_g2_i4, TR68880|c1_g2_i8, TR68880|c1_g2_i3, TR79580|c2_g1_i1, Mj_1_GCCAAT_L005_R1_001_(paired)_trimmed_(paired)_contig_552, Mj_1_GCCAAT_L005_R1_001_(paired)_trimmed_(paired)_contig_4795, TR71834|c0_g1_i5, Mj_1_GCCAAT_L005_R1_001_(paired)_trimmed_(paired)_contig_3057, TR46263|c0_g1_i1, TR72369|c0_g2_i12	9	29	31.0345
Glycerolipid metabolism	map00561	ec:2.3.1.20 - O-acyltransferase, ec:3.1.1.23 - lipase, ec:2.3.1.51 - O-acyltransferase, ec:3.1.1.26 - galactolipid lipase, ec:3.1.3.4 - phosphatase, ec:2.4.1.46 - synthase, ec:2.3.1.158 - acyltransferase, ec:3.1.1.3 - lipase, ec:2.3.1.15 - 1-O-acyltransferase, ec:3.2.1.22 - melibiase, ec:2.7.1.107 - kinase (ATP)	2, 3, 2, 3, 3, 3, 1, 3, 4, 10, 1	Mj_1_GCCAAT_L005_R1_001_(paired)_trimmed_(paired)_contig_15548, TR69259|c0_g1_i2, TR55826|c0_g1_i1, scaffold14112, TR74461|c0_g1_i3, TR68841|c0_g2_i2, TR68841|c0_g2_i1, scaffold14112, TR63798|c0_g1_i6, TR73644|c1_g1_i4, TR63244|c0_g1_i3, TR78246|c0_g2_i6, scaffold12835, Mj_1_GCCAAT_L005_R1_001_(paired)_trimmed_(paired)_contig_25307, TR66571|c0_g1_i2, TR53303|c0_g1_i2, TR76259|c0_g1_i1, TR76217|c2…	11	39	28.2051
Glycosaminoglycan biosynthesis - heparan sulfate / heparin	map00534	ec:2.4.1.223 - 4-alpha-N-acetylglucosaminyltransferase, ec:2.4.2.26 - xylosyltransferase, ec:2.4.1.134 - 3-beta-galactosyltransferase	1, 2, 4	Mj_1_GCCAAT_L005_R1_001_(paired)_trimmed_(paired)_contig_15492, TR55321|c0_g1_i1, TR66059|c0_g1_i1, TR77520|c0_g1_i3, TR69769|c1_g1_i7, Mj_1_GCCAAT_L005_R1_001_(paired)_trimmed_(paired)_contig_984, TR76477|c0_g1_i6	3	11	27.2727
Oxidative phosphorylation	map00190	ec:3.6.1.1 - diphosphatase, ec:7.1.2.2 - two-sector ATPase, ec:7.1.1.2 - reductase (H+-translocating)	1, 1, 5	TR67768|c2_g2_i1, Mj_1_GCCAAT_L005_R1_001_(paired)_trimmed_(paired)_contig_2692, TR59436|c1_g3_i2, Mj_1_GCCAAT_L005_R1_001_(paired)_trimmed_(paired)_contig_31487, TR55445|c0_g1_i2, TR61989|c0_g3_i1, Mj_1_GCCAAT_L005_R1_001_(paired)_trimmed_(paired)_contig_8080	3	11	27.2727
Aminoacyl-tRNA biosynthesis	map00970	ec:6.1.1.18 - ligase, ec:6.1.1.12 - ligase, ec:6.1.1.2 - ligase, ec:6.1.1.14 - ligase, ec:6.1.1.5 - ligase, ec:6.1.1.20 - ligase, ec:6.1.1.17 - ligase, ec:6.1.1.16 - ligase	3, 1, 1, 1, 2, 1, 3, 1	TR74385|c0_g1_i3, Mj_1_GCCAAT_L005_R1_001_(paired)_trimmed_(paired)_contig_5249, TR74385|c0_g1_i2, TR77863|c0_g1_i12, TR65040|c1_g1_i4, scaffold11443, TR69855|c0_g1_i3, TR69855|c1_g1_i1, TR68925|c0_g3_i5, TR74385|c0_g1_i3, Mj_1_GCCAAT_L005_R1_001_(paired)_trimmed_(paired)_contig_5249, TR74385|c0_g1_i2, TR71991|c2_g1_i1	8	31	25.8065
Phenylalanine, tyrosine and tryptophan biosynthesis	map00400	ec:1.1.1.25 - dehydrogenase, ec:2.6.1.1 - transaminase, ec:4.2.1.10 - dehydratase, ec:2.6.1.57 - transaminase, ec:1.1.1.282 - dehydrogenase, ec:2.6.1.9 - transaminase, ec:2.6.1.78 - aminotransferase, ec:4.1.3.27 - synthase, ec:2.6.1.5 - transaminase, ec:2.6.1.79 - aminotransferase	1, 7, 1, 7, 1, 2, 2, 3, 2, 2	TR74995|c0_g1_i4, TR69989|c1_g1_i2, TR77327|c0_g1_i3, Mj_1_GCCAAT_L005_R1_001_(paired)_trimmed_(paired)_contig_8600, TR64435|c0_g1_i1, TR69787|c0_g1_i2, TR77327|c0_g1_i4, TR69997|c0_g1_i1, TR74995|c0_g1_i4, TR69989|c1_g1_i2, TR77327|c0_g1_i3, Mj_1_GCCAAT_L005_R1_001_(paired)_trimmed_(paired)_contig_8600, TR64435|c0_g1_i1, TR69787|c0_g1_i2, TR77327|c0_g1_i4, TR69997|c0_g1_i1, TR74995|c0_g1_i4, TR6…	10	39	25.641
Cyanoamino acid metabolism	map00460	ec:1.14.14.37 - oxime monooxygenase, ec:4.2.1.65 - hydratase, ec:3.5.5.1 - acetonitrilase, ec:4.4.1.9 - synthase, ec:2.1.2.1 - hydroxymethyltransferase, ec:3.5.1.1 - asparaginase II, ec:3.5.5.4 - nitrilase	2, 1, 2, 2, 1, 1, 1	TR53041|c0_g1_i1, TR42608|c0_g1_i3, TR71437|c1_g4_i1, TR65769|c0_g2_i2, TR70893|c0_g1_i2, TR56390|c0_g1_i1, scaffold12500, TR67243|c0_g2_i1, TR60142|c3_g1_i1, TR71437|c1_g4_i1	7	29	24.1379
Carbon fixation in photosynthetic organisms	map00710	ec:4.1.1.49 - carboxykinase (ATP), ec:2.6.1.1 - transaminase, ec:1.2.1.12 - dehydrogenase (phosphorylating), ec:1.1.1.40 - dehydrogenase (oxaloacetate-decarboxylating) (NADP+), ec:1.2.1.59 - dehydrogenase (NAD(P)+) (phosphorylating), ec:1.1.1.39 - dehydrogenase (decarboxylating)	1, 7, 2, 5, 2, 4	TR62637|c0_g1_i1, TR69989|c1_g1_i2, TR77327|c0_g1_i3, Mj_1_GCCAAT_L005_R1_001_(paired)_trimmed_(paired)_contig_8600, TR64435|c0_g1_i1, TR69787|c0_g1_i2, TR77327|c0_g1_i4, TR69997|c0_g1_i1, TR67952|c0_g2_i3, Mj_1_GCCAAT_L005_R1_001_(paired)_trimmed_(paired)_contig_8210, Mj_1_GCCAAT_L005_R1_001_(paired)_trimmed_(paired)_contig_15334, TR73522|c0_g1_i1, TR52407|c0_g1_i2, Mj_1_GCCAAT_L005_R1_001_(pair…	6	25	24
Citrate cycle (TCA cycle)	map00020	ec:4.1.1.32 - carboxykinase (GTP), ec:4.1.1.49 - carboxykinase (ATP), ec:2.3.1.12 - acetyltransferase, ec:2.3.3.8 - citrate synthase, ec:2.3.1.61 - succinyltransferase, ec:6.2.1.5 - ligase (ADP-forming)	1, 1, 1, 6, 1, 6	TR62637|c0_g1_i1, TR62637|c0_g1_i1, TR72387|c0_g1_i5, C967348, TR41874|c0_g1_i1, Mj_1_GCCAAT_L005_R1_001_(paired)_trimmed_(paired)_contig_2824, TR72803|c1_g1_i3, Mj_1_GCCAAT_L005_R1_001_(paired)_trimmed_(paired)_contig_1215, TR72803|c1_g1_i6, TR72387|c0_g1_i5, C967348, TR41874|c0_g1_i1, Mj_1_GCCAAT_L005_R1_001_(paired)_trimmed_(paired)_contig_2824, TR72803|c1_g1_i3, Mj_1_GCCAAT_L005_R1_001_(paire…	6	25	24
Cysteine and methionine metabolism	map00270	ec:4.4.1.11 - gamma-lyase, ec:2.6.1.1 - transaminase, ec:1.13.11.54 - dioxygenase [iron(II)-requiring], ec:4.4.1.14 - synthase, ec:2.6.1.57 - transaminase, ec:2.7.2.4 - kinase, ec:2.6.1.42 - transaminase, ec:1.1.1.27 - dehydrogenase, ec:4.4.1.15 - desulfhydrase, ec:1.1.1.95 - dehydrogenase, ec:4.2.1.109 - 1-phosphate dehydratase, ec:2.5.1.47 - synthase, ec:2.6.1.5 - transaminase, ec:3.1.3.77 - sy…	1, 7, 1, 3, 7, 1, 3, 2, 2, 2, 1, 3, 2, 1, 2, 1, 2, 1	TR62341|c0_g1_i1, TR69989|c1_g1_i2, TR77327|c0_g1_i3, Mj_1_GCCAAT_L005_R1_001_(paired)_trimmed_(paired)_contig_8600, TR64435|c0_g1_i1, TR69787|c0_g1_i2, TR77327|c0_g1_i4, TR69997|c0_g1_i1, TR71423|c0_g4_i1, TR69787|c0_g1_i2, TR77327|c0_g1_i4, TR77327|c0_g1_i3, TR69989|c1_g1_i2, TR77327|c0_g1_i3, Mj_1_GCCAAT_L005_R1_001_(paired)_trimmed_(paired)_contig_8600, TR64435|c0_g1_i1, TR69787|c0_g1_i2, TR7…	18	76	23.6842
Glycolysis / Gluconeogenesis	map00010	ec:4.1.1.32 - carboxykinase (GTP), ec:4.1.1.49 - carboxykinase (ATP), ec:2.3.1.12 - acetyltransferase, ec:6.2.1.1 - ligase, ec:5.1.3.3 - 1-epimerase, ec:1.2.1.12 - dehydrogenase (phosphorylating), ec:1.1.1.27 - dehydrogenase, ec:2.7.1.2 - glucokinase (phosphorylating), ec:1.2.1.59 - dehydrogenase (NAD(P)+) (phosphorylating), ec:2.7.1.11 - phosphohexokinase, ec:2.7.1.40 - kinase	1, 1, 1, 2, 3, 2, 2, 1, 2, 2, 3	TR62637|c0_g1_i1, TR62637|c0_g1_i1, TR72387|c0_g1_i5, TR74015|c0_g1_i1, TR60612|c0_g1_i2, TR61063|c0_g1_i6, TR61219|c0_g1_i4, TR61219|c0_g1_i1, TR67952|c0_g2_i3, Mj_1_GCCAAT_L005_R1_001_(paired)_trimmed_(paired)_contig_8210, TR69387|c0_g2_i1, TR66562|c0_g1_i2, TR73457|c2_g2_i2, TR67952|c0_g2_i3, Mj_1_GCCAAT_L005_R1_001_(paired)_trimmed_(paired)_contig_8210, TR75056|c0_g1_i2, TR75056|c0_g1_i4, Mj_…	11	47	23.4043
Styrene degradation	map00643	ec:3.5.1.4 - acylamidase, ec:4.2.1.84 - hydratase, ec:3.5.5.1 - acetonitrilase, ec:5.2.1.2 - isomerase	1, 1, 2, 1	Mj_1_GCCAAT_L005_R1_001_(paired)_trimmed_(paired)_contig_4448, TR71437|c1_g4_i1, TR65769|c0_g2_i2, TR70893|c0_g1_i2, Mj_1_GCCAAT_L005_R1_001_(paired)_trimmed_(paired)_contig_5244	4	18	22.2222
Tropane, piperidine and pyridine alkaloid biosynthesis	map00960	ec:1.1.1.237 - reductase, ec:2.6.1.1 - transaminase, ec:2.6.1.57 - transaminase, ec:2.6.1.9 - transaminase, ec:2.6.1.5 - transaminase, ec:1.1.1.206 - reductase I	3, 7, 7, 2, 2, 3	TR66123|c1_g2_i3, TR69188|c0_g1_i3, TR66123|c1_g2_i4, TR69989|c1_g1_i2, TR77327|c0_g1_i3, Mj_1_GCCAAT_L005_R1_001_(paired)_trimmed_(paired)_contig_8600, TR64435|c0_g1_i1, TR69787|c0_g1_i2, TR77327|c0_g1_i4, TR69997|c0_g1_i1, TR69989|c1_g1_i2, TR77327|c0_g1_i3, Mj_1_GCCAAT_L005_R1_001_(paired)_trimmed_(paired)_contig_8600, TR64435|c0_g1_i1, TR69787|c0_g1_i2, TR77327|c0_g1_i4, TR69997|c0_g1_i1, TR6…	6	27	22.2222
Arginine biosynthesis	map00220	ec:3.5.1.14 - acid amidohydrolase, ec:2.6.1.1 - transaminase, ec:2.6.1.11 - transaminase, ec:3.5.1.16 - deacetylase, ec:6.3.4.5 - synthase, ec:1.4.1.3 - dehydrogenase [NAD(P)+]	2, 7, 1, 1, 1, 4	TR66658|c0_g1_i2, TR66984|c0_g1_i3, TR69989|c1_g1_i2, TR77327|c0_g1_i3, Mj_1_GCCAAT_L005_R1_001_(paired)_trimmed_(paired)_contig_8600, TR64435|c0_g1_i1, TR69787|c0_g1_i2, TR77327|c0_g1_i4, TR69997|c0_g1_i1, Mj_1_GCCAAT_L005_R1_001_(paired)_trimmed_(paired)_contig_15471, TR58579|c0_g2_i2, TR65469|c0_g1_i8, Mj_1_GCCAAT_L005_R1_001_(paired)_trimmed_(paired)_contig_11806, scaffold12409, TR70011|c0_g1…	6	28	21.4286
Phenylpropanoid biosynthesis	map00940	ec:2.4.1.128 - glucosyltransferase, ec:2.1.1.146 - O-methyltransferase, ec:1.2.1.44 - reductase, ec:2.1.1.68 - O-methyltransferase, ec:6.2.1.12 - ligase, ec:1.11.1.7 - lactoperoxidase	1, 1, 1, 4, 7, 9	TR77990|c0_g1_i6, TR59876|c0_g1_i1, Mj_1_GCCAAT_L005_R1_001_(paired)_trimmed_(paired)_contig_1837, TR65372|c2_g1_i5, Mj_1_GCCAAT_L005_R1_001_(paired)_trimmed_(paired)_contig_1794, TR48789|c0_g1_i1, TR65372|c2_g1_i4, Mj_1_GCCAAT_L005_R1_001_(paired)_trimmed_(paired)_contig_22728, TR74767|c0_g1_i1, TR74767|c0_g1_i2, TR79267|c2_g1_i3, TR75216|c0_g1_i4, TR75216|c0_g1_i1, TR75216|c0_g1_i2, TR74358|c1_…	6	30	20
Pyruvate metabolism	map00620	ec:4.1.1.32 - carboxykinase (GTP), ec:1.1.1.79 - reductase (NADP+), ec:4.1.1.49 - carboxykinase (ATP), ec:6.4.1.2 - carboxylase, ec:2.3.1.12 - acetyltransferase, ec:6.2.1.1 - ligase, ec:4.1.1.112 - decarboxylase, ec:1.1.1.40 - dehydrogenase (oxaloacetate-decarboxylating) (NADP+), ec:1.1.1.27 - dehydrogenase, ec:1.1.1.38 - dehydrogenase (oxaloacetate-decarboxylating), ec:4.4.1.5 - lyase, ec:1.1.1.…	1, 5, 1, 1, 1, 2, 3, 5, 2, 5, 1, 4, 3	TR62637|c0_g1_i1, Mj_1_GCCAAT_L005_R1_001_(paired)_trimmed_(paired)_contig_16270, TR66123|c1_g2_i3, TR78986|c2_g2_i6, TR69188|c0_g1_i3, TR66123|c1_g2_i4, TR62637|c0_g1_i1, TR78089|c0_g6_i4, TR72387|c0_g1_i5, TR74015|c0_g1_i1, TR60612|c0_g1_i2, Mj_1_GCCAAT_L005_R1_001_(paired)_trimmed_(paired)_contig_15334, Mj_1_GCCAAT_L005_R1_001_(paired)_trimmed_(paired)_contig_12993, TR52407|c0_g1_i2, Mj_1_GCCA…	13	67	19.403
Biosynthesis of unsaturated fatty acids	map01040	ec:1.14.19.2 - 9-desaturase, ec:1.3.3.6 - oxidase, ec:3.1.2.2 - hydrolase	2, 1, 4	TR60476|c0_g3_i5, TR60898|c1_g3_i2, TR76479|c1_g2_i3, Mj_1_GCCAAT_L005_R1_001_(paired)_trimmed_(paired)_contig_10017, TR65072|c0_g1_i1, TR65072|c0_g1_i2, scaffold11677	3	16	18.75
Biosynthesis of siderophore group nonribosomal peptides	map01053	ec:1.3.1.28 - dehydrogenase	1	TR60956|c0_g1_i1	1	6	16.6667
Caffeine metabolism	map00232	ec:2.3.1.5 - N-acetyltransferase, ec:1.14.14.1 - monooxygenase	6, 3	TR60280|c0_g1_i4, Mj_1_GCCAAT_L005_R1_001_(paired)_trimmed_(paired)_contig_7729, TR61385|c0_g1_i1, Mj_1_GCCAAT_L005_R1_001_(paired)_trimmed_(paired)_contig_19503, TR60280|c0_g1_i2, TR61385|c0_g1_i3, TR56925|c0_g1_i1, Mj_1_GCCAAT_L005_R1_001_(paired)_trimmed_(paired)_contig_11045, TR58680|c0_g1_i4	2	12	16.6667
Galactose metabolism	map00052	ec:2.4.1.67 - galactosyltransferase, ec:5.1.3.3 - 1-epimerase, ec:2.4.1.82 - galactosyltransferase, ec:3.2.1.20 - maltase, ec:2.7.1.2 - glucokinase (phosphorylating), ec:3.2.1.22 - melibiase, ec:1.1.1.48 - 1-dehydrogenase, ec:2.7.1.11 - phosphohexokinase	3, 3, 2, 2, 1, 10, 3, 2	TR76418|c0_g2_i3, TR76549|c0_g2_i2, scaffold12270, TR61063|c0_g1_i6, TR61219|c0_g1_i4, TR61219|c0_g1_i1, TR76418|c0_g2_i3, TR76549|c0_g2_i2, TR75132|c0_g1_i1, TR75132|c0_g1_i5, TR73457|c2_g2_i2, TR69702|c0_g1_i2, TR69702|c0_g1_i3, TR76549|c0_g2_i2, TR58483|c0_g1_i1, TR58483|c0_g1_i2, TR71478|c0_g1_i1, TR71478|c0_g1_i12, TR69923|c0_g1_i4, TR76418|c0_g2_i3, scaffold12270, Mj_1_GCCAAT_L005_R1_001_(p…	8	48	16.6667
Glycosaminoglycan biosynthesis - chondroitin sulfate / dermatan sulfate	map00532	ec:2.4.2.26 - xylosyltransferase, ec:2.4.1.134 - 3-beta-galactosyltransferase	2, 4	TR55321|c0_g1_i1, TR66059|c0_g1_i1, TR77520|c0_g1_i3, TR69769|c1_g1_i7, Mj_1_GCCAAT_L005_R1_001_(paired)_trimmed_(paired)_contig_984, TR76477|c0_g1_i6	2	12	16.6667
Inositol phosphate metabolism	map00562	ec:2.7.1.67 - 4-kinase, ec:3.1.4.11 - phospholipase C, ec:2.7.1.159 - 5/6-kinase, ec:3.1.3.36 - 5-phosphatase, ec:2.7.1.68 - 5-kinase, ec:2.7.1.134 - 1-kinase, ec:1.13.99.1 - oxygenase, ec:3.1.3.57 - 1-phosphatase	2, 2, 1, 1, 2, 1, 1, 2	TR78523|c0_g2_i3, C974654, TR69057|c0_g1_i3, TR71447|c2_g2_i3, TR79224|c1_g2_i13, TR73731|c0_g2_i4, TR68880|c1_g2_i8, TR68880|c1_g2_i3, TR79224|c1_g2_i13, TR77847|c1_g7_i11, Mj_1_GCCAAT_L005_R1_001_(paired)_trimmed_(paired)_contig_3057, TR46263|c0_g1_i1	8	48	16.6667
Synthesis and degradation of ketone bodies	map00072	ec:4.1.3.4 - lyase	1	TR75912|c0_g1_i2	1	6	16.6667
Thiamine metabolism	map00730	ec:3.6.1.15 - phosphatase, ec:2.7.4.3 - kinase, ec:3.1.3.2 - phosphatase, ec:2.2.1.7 - synthase	28, 1, 6, 3	TR66008|c4_g2_i2, TR66147|c0_g1_i3, TR66147|c0_g1_i4, TR55118|c0_g3_i1, Mj_1_GCCAAT_L005_R1_001_(paired)_trimmed_(paired)_contig_11498, TR58515|c0_g1_i1, TR66450|c0_g1_i3, TR63213|c0_g1_i4, Mj_1_GCCAAT_L005_R1_001_(paired)_trimmed_(paired)_contig_7363, Mj_1_GCCAAT_L005_R1_001_(paired)_trimmed_(paired)_contig_9127, TR65845|c0_g2_i1, TR66803|c0_g1_i2, Mj_1_GCCAAT_L005_R1_001_(paired)_trimmed_(paire…	4	24	16.6667
Vitamin B6 metabolism	map00750	ec:1.4.3.5 - 5'-phosphate synthase, ec:1.1.1.65 - 4-dehydrogenase, ec:1.1.1.107 - 4-dehydrogenase, ec:1.2.3.1 - oxidase	1, 2, 3, 3	TR75782|c0_g3_i7, Mj_1_GCCAAT_L005_R1_001_(paired)_trimmed_(paired)_contig_27192, TR66912|c3_g2_i7, Mj_1_GCCAAT_L005_R1_001_(paired)_trimmed_(paired)_contig_11806, scaffold12409, TR70011|c0_g1_i2, Mj_1_GCCAAT_L005_R1_001_(paired)_trimmed_(paired)_contig_403, TR76423|c1_g1_i1, TR76423|c1_g1_i9	4	25	16
Arachidonic acid metabolism	map00590	ec:3.3.2.6 - hydrolase, ec:1.1.1.189 - 9-reductase, ec:1.1.1.184 - reductase (NADPH), ec:1.14.14.1 - monooxygenase	1, 2, 3, 3	TR72081|c0_g3_i3, TR54142|c0_g1_i1, TR67175|c0_g1_i1, TR62642|c0_g2_i2, scaffold10204, TR62642|c0_g2_i1, TR56925|c0_g1_i1, Mj_1_GCCAAT_L005_R1_001_(paired)_trimmed_(paired)_contig_11045, TR58680|c0_g1_i4	4	26	15.3846
Fatty acid elongation	map00062	ec:3.1.2.22 - hydrolase, ec:3.1.2.2 - hydrolase	1, 4	TR78449|c2_g3_i6, Mj_1_GCCAAT_L005_R1_001_(paired)_trimmed_(paired)_contig_10017, TR65072|c0_g1_i1, TR65072|c0_g1_i2, scaffold11677	2	13	15.3846
Glycosphingolipid biosynthesis - globo and isoglobo series	map00603	ec:3.2.1.52 - hexosaminidase, ec:3.2.1.22 - melibiase	1, 10	Mj_1_GCCAAT_L005_R1_001_(paired)_trimmed_(paired)_contig_4518, TR69702|c0_g1_i2, TR69702|c0_g1_i3, TR76549|c0_g2_i2, TR58483|c0_g1_i1, TR58483|c0_g1_i2, TR71478|c0_g1_i1, TR71478|c0_g1_i12, TR69923|c0_g1_i4, TR76418|c0_g2_i3, scaffold12270	2	13	15.3846
Steroid degradation	map00984	ec:1.1.1.145 - dehydrogenase, ec:1.3.99.5 - 4-dehydrogenase (acceptor)	2, 1	TR62637|c0_g1_i1, TR77258|c5_g1_i3, Mj_1_GCCAAT_L005_R1_001_(paired)_trimmed_(paired)_contig_19029	2	13	15.3846
Ascorbate and aldarate metabolism	map00053	ec:1.3.2.3 - dehydrogenase, ec:1.1.3.8 - oxidase, ec:1.6.5.4 - reductase (NADH), ec:1.13.99.1 - oxygenase, ec:5.1.3.18 - 3,5-epimerase, ec:2.4.1.17 - 1-naphthol glucuronyltransferase, ec:1.10.3.3 - oxidase	3, 3, 1, 1, 1, 6, 2	scaffold12409, TR70011|c0_g1_i2, TR73930|c2_g1_i3, Mj_1_GCCAAT_L005_R1_001_(paired)_trimmed_(paired)_contig_8419, TR73930|c2_g1_i3, TR77817|c1_g1_i5, TR69886|c0_g4_i2, TR77847|c1_g7_i11, Mj_1_GCCAAT_L005_R1_001_(paired)_trimmed_(paired)_contig_252, TR77567|c1_g1_i1, TR55321|c0_g1_i1, TR77567|c1_g1_i2, TR77567|c1_g1_i4, Mj_1_GCCAAT_L005_R1_001_(paired)_trimmed_(paired)_contig_466, TR55751|c0_g1_i1…	7	46	15.2174
Purine metabolism	map00230	ec:3.6.1.15 - phosphatase, ec:3.1.7.2 - 3'-diphosphatase, ec:2.7.4.3 - kinase, ec:3.6.1.9 - diphosphatase, ec:3.5.4.3 - deaminase, ec:1.17.4.1 - reductase, ec:3.6.1.17 - (asymmetrical), ec:6.3.4.4 - synthase, ec:3.5.4.4 - deaminase, ec:6.3.4.13 - ligase, ec:1.17.1.4 - dehydrogenase, ec:4.3.2.3 - lyase, ec:3.6.1.29 - dinucleosidetriphosphatase, ec:2.4.2.7 - phosphoribosyltransferase, ec:2.7.1.40 -…	28, 2, 1, 5, 1, 1, 1, 1, 1, 2, 2, 1, 1, 1, 3, 1	TR66008|c4_g2_i2, TR66147|c0_g1_i3, TR66147|c0_g1_i4, TR55118|c0_g3_i1, Mj_1_GCCAAT_L005_R1_001_(paired)_trimmed_(paired)_contig_11498, TR58515|c0_g1_i1, TR66450|c0_g1_i3, TR63213|c0_g1_i4, Mj_1_GCCAAT_L005_R1_001_(paired)_trimmed_(paired)_contig_7363, Mj_1_GCCAAT_L005_R1_001_(paired)_trimmed_(paired)_contig_9127, TR65845|c0_g2_i1, TR66803|c0_g1_i2, Mj_1_GCCAAT_L005_R1_001_(paired)_trimmed_(paire…	16	109	14.6789
Glycerophospholipid metabolism	map00564	ec:3.1.4.4 - D, ec:2.3.1.51 - O-acyltransferase, ec:2.3.1.43 - O-acyltransferase, ec:3.1.3.4 - phosphatase, ec:2.3.1.15 - 1-O-acyltransferase, ec:2.7.7.41 - cytidylyltransferase, ec:2.1.1.103 - N-methyltransferase, ec:2.7.1.107 - kinase (ATP), ec:3.1.1.32 - A1	2, 2, 1, 3, 4, 1, 7, 1, 3	TR75009|c1_g5_i5, Mj_1_GCCAAT_L005_R1_001_(paired)_trimmed_(paired)_contig_7308, TR68841|c0_g2_i2, TR68841|c0_g2_i1, TR76259|c0_g1_i1, TR63244|c0_g1_i3, TR78246|c0_g2_i6, scaffold12835, TR73505|c0_g1_i1, TR67603|c0_g1_i1, Mj_1_GCCAAT_L005_R1_001_(paired)_trimmed_(paired)_contig_3160, TR73505|c0_g1_i3, TR71834|c0_g1_i5, scaffold1032, Mj_1_GCCAAT_L005_R1_001_(paired)_trimmed_(paired)_contig_1377, T…	9	62	14.5161
Riboflavin metabolism	map00740	ec:3.5.4.25 - cyclohydrolase II, ec:3.6.1.9 - diphosphatase, ec:3.1.3.2 - phosphatase, ec:4.1.99.12 - synthase	2, 5, 6, 2	Mj_1_GCCAAT_L005_R1_001_(paired)_trimmed_(paired)_contig_3406, Mj_1_GCCAAT_L005_R1_001_(paired)_trimmed_(paired)_contig_4175, Mj_1_GCCAAT_L005_R1_001_(paired)_trimmed_(paired)_contig_13294, TR56346|c0_g1_i1, TR65010|c4_g1_i1, Mj_1_GCCAAT_L005_R1_001_(paired)_trimmed_(paired)_contig_21402, TR62858|c0_g1_i3, TR78246|c0_g2_i6, scaffold11947, TR53095|c0_g1_i1, TR61606|c0_g1_i1, TR52551|c0_g1_i1, TR72…	4	28	14.2857
Alanine, aspartate and glutamate metabolism	map00250	ec:2.6.1.16 - transaminase (isomerizing), ec:2.6.1.1 - transaminase, ec:2.6.1.96 - transaminase, ec:6.3.4.4 - synthase, ec:6.3.4.5 - synthase, ec:3.5.1.1 - asparaginase II, ec:1.4.1.3 - dehydrogenase [NAD(P)+]	2, 7, 1, 1, 1, 1, 4	TR77943|c5_g1_i3, TR77943|c5_g1_i2, TR69989|c1_g1_i2, TR77327|c0_g1_i3, Mj_1_GCCAAT_L005_R1_001_(paired)_trimmed_(paired)_contig_8600, TR64435|c0_g1_i1, TR69787|c0_g1_i2, TR77327|c0_g1_i4, TR69997|c0_g1_i1, Mj_1_GCCAAT_L005_R1_001_(paired)_trimmed_(paired)_contig_15471, TR68100|c0_g1_i1, TR65469|c0_g1_i8, TR60142|c3_g1_i1, Mj_1_GCCAAT_L005_R1_001_(paired)_trimmed_(paired)_contig_11806, scaffold12…	7	50	14
Terpenoid backbone biosynthesis	map00900	ec:2.5.1.84 - diphosphate synthase [geranyl-diphosphate specific], ec:2.5.1.30 - diphosphate synthase, ec:2.5.1.10 - diphosphate synthase, ec:2.5.1.85 - diphosphate synthase [geranylgeranyl-diphosphate specific], ec:2.5.1.31 - synthase [(2E,6E)-farnesyl-diphosphate specific], ec:2.2.1.7 - synthase, ec:2.5.1.1 - geranyl-diphosphate synthase	1, 1, 1, 1, 1, 3, 2	TR72612|c0_g1_i1, TR72612|c0_g1_i1, TR67102|c0_g1_i1, TR72612|c0_g1_i1, TR70283|c2_g2_i2, TR67429|c1_g1_i4, Mj_1_GCCAAT_L005_R1_001_(paired)_trimmed_(paired)_contig_17264, TR65056|c0_g2_i2, TR67102|c0_g1_i1, TR72612|c0_g1_i1	7	50	14
Tryptophan metabolism	map00380	ec:3.5.1.4 - acylamidase, ec:2.8.2.24 - desulfoglucosinolate sulfotransferase, ec:2.3.1.61 - succinyltransferase, ec:4.2.1.84 - hydratase, ec:3.5.5.1 - acetonitrilase, ec:1.2.3.1 - oxidase, ec:1.2.3.7 - oxidase, ec:1.14.14.1 - monooxygenase	1, 1, 1, 1, 2, 3, 1, 3	Mj_1_GCCAAT_L005_R1_001_(paired)_trimmed_(paired)_contig_4448, TR38167|c0_g1_i1, TR72387|c0_g1_i5, TR71437|c1_g4_i1, TR65769|c0_g2_i2, TR70893|c0_g1_i2, Mj_1_GCCAAT_L005_R1_001_(paired)_trimmed_(paired)_contig_403, TR76423|c1_g1_i1, TR76423|c1_g1_i9, TR73711|c0_g3_i1, TR56925|c0_g1_i1, Mj_1_GCCAAT_L005_R1_001_(paired)_trimmed_(paired)_contig_11045, TR58680|c0_g1_i4	8	58	13.7931
Glucosinolate biosynthesis	map00966	ec:2.8.2.24 - desulfoglucosinolate sulfotransferase, ec:2.6.1.42 - transaminase	1, 3	TR38167|c0_g1_i1, TR45202|c0_g1_i1, TR66612|c0_g1_i1, Mj_1_GCCAAT_L005_R1_001_(paired)_trimmed_(paired)_contig_1457	2	15	13.3333
Glycosaminoglycan degradation	map00531	ec:3.2.1.50 - alpha-acetylglucosaminidase, ec:3.2.1.52 - hexosaminidase	1, 1	Mj_1_GCCAAT_L005_R1_001_(paired)_trimmed_(paired)_contig_21323, Mj_1_GCCAAT_L005_R1_001_(paired)_trimmed_(paired)_contig_4518	2	15	13.3333
Anthocyanin biosynthesis	map00942	ec:2.3.1.153 - 5-(6'''-hydroxycinnamoyltransferase), ec:2.4.1.115 - 3-O-glucosyltransferase	1, 9	TR72300|c3_g1_i3, TR73362|c0_g1_i2, TR77657|c2_g3_i1, Mj_1_GCCAAT_L005_R1_001_(paired)_trimmed_(paired)_contig_14086, Mj_1_GCCAAT_L005_R1_001_(paired)_trimmed_(paired)_contig_15197, TR79162|c1_g3_i6, TR72465|c1_g1_i1, Mj_1_GCCAAT_L005_R1_001_(paired)_trimmed_(paired)_contig_24840, TR56281|c1_g2_i1, TR77990|c0_g1_i6	2	16	12.5
Glycosphingolipid biosynthesis - ganglio series	map00604	ec:3.2.1.52 - hexosaminidase	1	Mj_1_GCCAAT_L005_R1_001_(paired)_trimmed_(paired)_contig_4518	1	8	12.5
One carbon pool by folate	map00670	ec:3.5.4.9 - cyclohydrolase, ec:1.5.1.5 - dehydrogenase (NADP+), ec:2.1.2.1 - hydroxymethyltransferase	2, 2, 1	TR59781|c0_g1_i2, TR62053|c0_g1_i3, TR59781|c0_g1_i2, TR62053|c0_g1_i3, TR67243|c0_g2_i1	3	24	12.5
Carbon fixation pathways in prokaryotes	map00720	ec:6.4.1.2 - carboxylase, ec:2.3.3.8 - citrate synthase, ec:6.2.1.1 - ligase, ec:3.5.4.9 - cyclohydrolase, ec:1.5.1.5 - dehydrogenase (NADP+), ec:6.2.1.5 - ligase (ADP-forming)	1, 6, 2, 2, 2, 6	TR78089|c0_g6_i4, C967348, TR41874|c0_g1_i1, Mj_1_GCCAAT_L005_R1_001_(paired)_trimmed_(paired)_contig_2824, TR72803|c1_g1_i3, Mj_1_GCCAAT_L005_R1_001_(paired)_trimmed_(paired)_contig_1215, TR72803|c1_g1_i6, TR74015|c0_g1_i1, TR60612|c0_g1_i2, TR59781|c0_g1_i2, TR62053|c0_g1_i3, TR59781|c0_g1_i2, TR62053|c0_g1_i3, C967348, TR41874|c0_g1_i1, Mj_1_GCCAAT_L005_R1_001_(paired)_trimmed_(paired)_contig_…	6	50	12
Steroid biosynthesis	map00100	ec:5.4.99.8 - synthase, ec:2.1.1.41 - 24-C-methyltransferase, ec:2.1.1.143 - C-methyltransferase	2, 2, 2	TR78520|c1_g3_i2, TR78484|c0_g1_i1, TR70688|c0_g1_i2, TR70688|c1_g1_i2, TR70688|c0_g1_i2, TR70688|c1_g1_i2	3	25	12
Glycine, serine and threonine metabolism	map00260	ec:2.7.2.4 - kinase, ec:1.1.1.95 - dehydrogenase, ec:3.1.3.3 - phosphatase, ec:2.1.2.1 - hydroxymethyltransferase, ec:1.5.3.1 - oxidase, ec:1.1.1.3 - dehydrogenase, ec:1.1.1.81 - reductase, ec:1.1.1.29 - dehydrogenase	1, 2, 1, 1, 1, 2, 5, 1	TR79257|c1_g2_i1, scaffold13038, TR60354|c1_g1_i1, TR79656|c2_g2_i4, TR67243|c0_g2_i1, Mj_1_GCCAAT_L005_R1_001_(paired)_trimmed_(paired)_contig_12914, TR79257|c1_g2_i1, TR66531|c2_g2_i2, Mj_1_GCCAAT_L005_R1_001_(paired)_trimmed_(paired)_contig_16270, TR66123|c1_g2_i3, TR78986|c2_g2_i6, TR69188|c0_g1_i3, TR66123|c1_g2_i4, TR66973|c0_g2_i4	8	68	11.7647
Tyrosine metabolism	map00350	ec:1.1.1.237 - reductase, ec:2.6.1.1 - transaminase, ec:2.6.1.57 - transaminase, ec:2.6.1.9 - transaminase, ec:5.2.1.2 - isomerase, ec:1.2.3.1 - oxidase, ec:2.6.1.5 - transaminase	3, 7, 7, 2, 1, 3, 2	TR66123|c1_g2_i3, TR69188|c0_g1_i3, TR66123|c1_g2_i4, TR69989|c1_g1_i2, TR77327|c0_g1_i3, Mj_1_GCCAAT_L005_R1_001_(paired)_trimmed_(paired)_contig_8600, TR64435|c0_g1_i1, TR69787|c0_g1_i2, TR77327|c0_g1_i4, TR69997|c0_g1_i1, TR69989|c1_g1_i2, TR77327|c0_g1_i3, Mj_1_GCCAAT_L005_R1_001_(paired)_trimmed_(paired)_contig_8600, TR64435|c0_g1_i1, TR69787|c0_g1_i2, TR77327|c0_g1_i4, TR69997|c0_g1_i1, TR6…	7	61	11.4754
Fluorobenzoate degradation	map00364	ec:4.2.1.84 - hydratase, ec:5.5.1.1 - cycloisomerase	1, 3	TR71437|c1_g4_i1, TR63637|c0_g1_i3, TR64393|c0_g1_i1, TR64393|c0_g1_i2	2	18	11.1111
Selenocompound metabolism	map00450	ec:4.4.1.11 - gamma-lyase, ec:2.5.1.48 - gamma-synthase	1, 1	TR62341|c0_g1_i1, TR62341|c0_g1_i1	2	18	11.1111
Sphingolipid metabolism	map00600	ec:3.1.3.4 - phosphatase, ec:3.2.1.22 - melibiase, ec:2.3.1.50 - C-palmitoyltransferase	3, 10, 6	TR63244|c0_g1_i3, TR78246|c0_g2_i6, scaffold12835, TR69702|c0_g1_i2, TR69702|c0_g1_i3, TR76549|c0_g2_i2, TR58483|c0_g1_i1, TR58483|c0_g1_i2, TR71478|c0_g1_i1, TR71478|c0_g1_i12, TR69923|c0_g1_i4, TR76418|c0_g2_i3, scaffold12270, TR71245|c0_g1_i4, TR71245|c0_g1_i2, TR72254|c2_g1_i3, TR72254|c2_g1_i2, TR71245|c0_g1_i6, TR71245|c0_g1_i5	3	27	11.1111
Steroid hormone biosynthesis	map00140	ec:1.1.1.145 - dehydrogenase, ec:1.1.1.62 - 17-dehydrogenase, ec:2.4.1.17 - 1-naphthol glucuronyltransferase, ec:1.14.14.1 - monooxygenase	2, 1, 6, 3	TR62637|c0_g1_i1, TR77258|c5_g1_i3, TR65807|c0_g1_i2, TR77567|c1_g1_i1, TR55321|c0_g1_i1, TR77567|c1_g1_i2, TR77567|c1_g1_i4, Mj_1_GCCAAT_L005_R1_001_(paired)_trimmed_(paired)_contig_466, TR55751|c0_g1_i1, TR56925|c0_g1_i1, Mj_1_GCCAAT_L005_R1_001_(paired)_trimmed_(paired)_contig_11045, TR58680|c0_g1_i4	4	36	11.1111
Glyoxylate and dicarboxylate metabolism	map00630	ec:1.1.1.79 - reductase (NADP+), ec:6.2.1.1 - ligase, ec:1.1.1.36 - reductase, ec:1.1.1.26 - reductase, ec:6.2.1.8 - ligase, ec:2.1.2.1 - hydroxymethyltransferase, ec:1.1.1.81 - reductase, ec:1.1.1.29 - dehydrogenase	5, 2, 1, 6, 6, 1, 5, 1	Mj_1_GCCAAT_L005_R1_001_(paired)_trimmed_(paired)_contig_16270, TR66123|c1_g2_i3, TR78986|c2_g2_i6, TR69188|c0_g1_i3, TR66123|c1_g2_i4, TR74015|c0_g1_i1, TR60612|c0_g1_i2, TR65807|c0_g1_i2, TR79302|c1_g1_i6, Mj_1_GCCAAT_L005_R1_001_(paired)_trimmed_(paired)_contig_16270, TR66123|c1_g2_i3, TR78986|c2_g2_i6, TR69188|c0_g1_i3, TR66123|c1_g2_i4, Mj_1_GCCAAT_L005_R1_001_(paired)_trimmed_(paired)_conti…	8	73	10.9589
Isoquinoline alkaloid biosynthesis	map00950	ec:1.1.1.247 - reductase (NADPH), ec:2.6.1.1 - transaminase, ec:2.3.1.150 - 7-O-acetyltransferase, ec:2.6.1.57 - transaminase, ec:2.6.1.5 - transaminase, ec:1.21.3.3 - oxidase	2, 7, 1, 7, 2, 1	TR67602|c0_g1_i1, TR67602|c0_g1_i3, TR69989|c1_g1_i2, TR77327|c0_g1_i3, Mj_1_GCCAAT_L005_R1_001_(paired)_trimmed_(paired)_contig_8600, TR64435|c0_g1_i1, TR69787|c0_g1_i2, TR77327|c0_g1_i4, TR69997|c0_g1_i1, TR73422|c1_g1_i1, TR69989|c1_g1_i2, TR77327|c0_g1_i3, Mj_1_GCCAAT_L005_R1_001_(paired)_trimmed_(paired)_contig_8600, TR64435|c0_g1_i1, TR69787|c0_g1_i2, TR77327|c0_g1_i4, TR69997|c0_g1_i1, TR6…	6	55	10.9091
Lysine biosynthesis	map00300	ec:2.6.1.57 - transaminase, ec:2.7.2.4 - kinase, ec:1.1.1.3 - dehydrogenase	7, 1, 2	TR69989|c1_g1_i2, TR77327|c0_g1_i3, Mj_1_GCCAAT_L005_R1_001_(paired)_trimmed_(paired)_contig_8600, TR64435|c0_g1_i1, TR69787|c0_g1_i2, TR77327|c0_g1_i4, TR69997|c0_g1_i1, TR79257|c1_g2_i1, TR79257|c1_g2_i1, TR66531|c2_g2_i2	3	28	10.7143
Phenylalanine metabolism	map00360	ec:3.5.1.4 - acylamidase, ec:1.1.1.237 - reductase, ec:2.6.1.1 - transaminase, ec:2.6.1.57 - transaminase, ec:2.6.1.9 - transaminase, ec:2.6.1.5 - transaminase, ec:3.5.1.32 - hydrolase	1, 3, 7, 7, 2, 2, 5	Mj_1_GCCAAT_L005_R1_001_(paired)_trimmed_(paired)_contig_4448, TR66123|c1_g2_i3, TR69188|c0_g1_i3, TR66123|c1_g2_i4, TR69989|c1_g1_i2, TR77327|c0_g1_i3, Mj_1_GCCAAT_L005_R1_001_(paired)_trimmed_(paired)_contig_8600, TR64435|c0_g1_i1, TR69787|c0_g1_i2, TR77327|c0_g1_i4, TR69997|c0_g1_i1, TR69989|c1_g1_i2, TR77327|c0_g1_i3, Mj_1_GCCAAT_L005_R1_001_(paired)_trimmed_(paired)_contig_8600, TR64435|c0_g…	7	66	10.6061
Glutathione metabolism	map00480	ec:1.1.1.44 - dehydrogenase (NADP+-dependent, decarboxylating), ec:1.17.4.1 - reductase, ec:2.5.1.18 - transferase, ec:1.8.1.7 - reductase	2, 1, 2, 1	Mj_1_GCCAAT_L005_R1_001_(paired)_trimmed_(paired)_contig_6612, TR74554|c0_g1_i6, TR69942|c0_g2_i4, Mj_1_GCCAAT_L005_R1_001_(paired)_trimmed_(paired)_contig_5244, TR69895|c0_g1_i2, TR77306|c0_g1_i8	4	38	10.5263
Indole alkaloid biosynthesis	map00901	ec:1.14.11.20 - 4-hydroxylase, ec:4.3.3.2 - synthase	1, 2	TR70810|c0_g1_i1, TR64791|c0_g1_i1, Mj_1_GCCAAT_L005_R1_001_(paired)_trimmed_(paired)_contig_32843	2	19	10.5263
Peptidoglycan biosynthesis	map00550	ec:1.3.1.98 - dehydrogenase, ec:2.5.1.31 - synthase [(2E,6E)-farnesyl-diphosphate specific]	2, 1	TR62963|c0_g1_i1, Mj_1_GCCAAT_L005_R1_001_(paired)_trimmed_(paired)_contig_8419, TR70283|c2_g2_i2	2	19	10.5263
Sulfur metabolism	map00920	ec:3.1.3.7 - nucleotidase, ec:3.6.2.1 - adenosine 5-phosphosulfate sulfohydrolase, ec:2.5.1.47 - synthase, ec:2.8.1.1 - sulfurtransferase, ec:2.5.1.48 - gamma-synthase	2, 1, 3, 2, 1	Mj_1_GCCAAT_L005_R1_001_(paired)_trimmed_(paired)_contig_3057, TR46263|c0_g1_i1, TR62858|c0_g1_i3, TR56390|c0_g1_i1, TR66111|c4_g3_i3, scaffold12500, TR69717|c3_g1_i3, TR69717|c3_g1_i1, TR62341|c0_g1_i1	5	48	10.4167
Fatty acid degradation	map00071	ec:6.2.1.3 - ligase, ec:1.3.3.6 - oxidase, ec:1.14.14.1 - monooxygenase	7, 1, 3	TR77739|c0_g1_i13, Mj_1_GCCAAT_L005_R1_001_(paired)_trimmed_(paired)_contig_3201, TR70691|c0_g1_i1, TR78103|c0_g1_i9, TR77739|c0_g1_i9, TR73151|c1_g2_i2, TR78103|c0_g1_i2, TR76479|c1_g2_i3, TR56925|c0_g1_i1, Mj_1_GCCAAT_L005_R1_001_(paired)_trimmed_(paired)_contig_11045, TR58680|c0_g1_i4	3	29	10.3448
Nicotinate and nicotinamide metabolism	map00760	ec:2.7.7.1 - adenylyltransferase, ec:3.6.1.9 - diphosphatase, ec:2.7.1.23 - kinase, ec:2.7.7.18 - adenylyltransferase, ec:1.2.3.1 - oxidase, ec:3.6.1.22 - diphosphatase	1, 5, 1, 1, 3, 3	TR62237|c1_g1_i4, Mj_1_GCCAAT_L005_R1_001_(paired)_trimmed_(paired)_contig_13294, TR56346|c0_g1_i1, TR65010|c4_g1_i1, Mj_1_GCCAAT_L005_R1_001_(paired)_trimmed_(paired)_contig_21402, TR62858|c0_g1_i3, TR72369|c0_g2_i12, TR62237|c1_g1_i4, Mj_1_GCCAAT_L005_R1_001_(paired)_trimmed_(paired)_contig_403, TR76423|c1_g1_i1, TR76423|c1_g1_i9, Mj_1_GCCAAT_L005_R1_001_(paired)_trimmed_(paired)_contig_13294, …	6	59	10.1695
Atrazine degradation	map00791	ec:3.8.1.8 - chlorohydrolase	1	TR72111|c1_g1_i2	1	10	10
Geraniol degradation	map00281	ec:4.1.3.4 - lyase	1	TR75912|c0_g1_i2	1	10	10
Ubiquinone and other terpenoid-quinone biosynthesis	map00130	ec:1.1.1.237 - reductase, ec:6.2.1.26 - ligase, ec:2.6.1.5 - transaminase, ec:6.2.1.12 - ligase	3, 8, 2, 7	TR66123|c1_g2_i3, TR69188|c0_g1_i3, TR66123|c1_g2_i4, Mj_1_GCCAAT_L005_R1_001_(paired)_trimmed_(paired)_contig_22728, TR44318|c0_g1_i1, TR74767|c0_g1_i1, TR74767|c0_g1_i2, TR75216|c0_g1_i4, C970080, TR75216|c0_g1_i1, TR75216|c0_g1_i2, TR69997|c0_g1_i1, TR69989|c1_g1_i2, Mj_1_GCCAAT_L005_R1_001_(paired)_trimmed_(paired)_contig_22728, TR74767|c0_g1_i1, TR74767|c0_g1_i2, TR79267|c2_g1_i3, TR75216|c0…	4	40	10
Folate biosynthesis	map00790	ec:3.5.4.25 - cyclohydrolase II, ec:3.4.19.9 - gamma-glutamyl hydrolase, ec:1.1.1.184 - reductase (NADPH), ec:4.1.2.25 - aldolase, ec:2.8.1.12 - synthase	2, 1, 3, 1, 1	Mj_1_GCCAAT_L005_R1_001_(paired)_trimmed_(paired)_contig_3406, Mj_1_GCCAAT_L005_R1_001_(paired)_trimmed_(paired)_contig_4175, TR60142|c3_g1_i1, TR62642|c0_g2_i2, scaffold10204, TR62642|c0_g2_i1, TR60424|c0_g1_i3, TR55009|c0_g1_i1	5	51	9.80392
Pantothenate and CoA biosynthesis	map00770	ec:3.6.1.9 - diphosphatase, ec:2.7.1.24 - kinase, ec:2.6.1.42 - transaminase	5, 3, 3	Mj_1_GCCAAT_L005_R1_001_(paired)_trimmed_(paired)_contig_13294, TR56346|c0_g1_i1, TR65010|c4_g1_i1, Mj_1_GCCAAT_L005_R1_001_(paired)_trimmed_(paired)_contig_21402, TR62858|c0_g1_i3, TR69448|c0_g1_i2, TR74970|c0_g1_i3, scaffold1046, TR45202|c0_g1_i1, TR66612|c0_g1_i1, Mj_1_GCCAAT_L005_R1_001_(paired)_trimmed_(paired)_contig_1457	3	31	9.67742
Amino sugar and nucleotide sugar metabolism	map00520	ec:2.6.1.16 - transaminase (isomerizing), ec:2.4.2.24 - synthase, ec:2.4.1.43 - 4-alpha-galacturonosyltransferase, ec:2.7.7.27 - adenylyltransferase, ec:1.3.1.98 - dehydrogenase, ec:2.7.1.2 - glucokinase (phosphorylating), ec:3.2.1.52 - hexosaminidase, ec:1.6.2.2 - reductase, ec:5.1.3.18 - 3,5-epimerase, ec:2.7.7.13 - guanylyltransferase, ec:2.7.1.4 - fructokinase (phosphorylating)	2, 2, 3, 3, 2, 1, 1, 3, 1, 6, 2	TR77943|c5_g1_i3, TR77943|c5_g1_i2, Mj_1_GCCAAT_L005_R1_001_(paired)_trimmed_(paired)_contig_466, TR55751|c0_g1_i1, TR72270|c0_g1_i1, Mj_1_GCCAAT_L005_R1_001_(paired)_trimmed_(paired)_contig_3218, TR72270|c0_g1_i3, TR77706|c0_g2_i2, Mj_1_GCCAAT_L005_R1_001_(paired)_trimmed_(paired)_contig_14842, TR77706|c0_g2_i1, TR62963|c0_g1_i1, Mj_1_GCCAAT_L005_R1_001_(paired)_trimmed_(paired)_contig_8419, TR7…	11	119	9.2437
Pyrimidine metabolism	map00240	ec:2.7.4.9 - kinase, ec:2.4.2.9 - phosphoribosyltransferase, ec:2.7.1.48 - kinase, ec:3.6.1.9 - diphosphatase, ec:1.17.4.1 - reductase, ec:3.6.1.17 - (asymmetrical)	1, 3, 4, 5, 1, 1	TR63299|c0_g1_i3, TR64161|c3_g1_i2, TR64161|c3_g1_i6, TR71458|c0_g2_i1, TR64161|c3_g1_i6, TR64161|c3_g1_i2, TR71458|c0_g2_i1, TR75378|c0_g1_i5, Mj_1_GCCAAT_L005_R1_001_(paired)_trimmed_(paired)_contig_13294, TR56346|c0_g1_i1, TR65010|c4_g1_i1, Mj_1_GCCAAT_L005_R1_001_(paired)_trimmed_(paired)_contig_21402, TR62858|c0_g1_i3, TR69942|c0_g2_i4, Mj_1_GCCAAT_L005_R1_001_(paired)_trimmed_(paired)_conti…	6	65	9.23077
C5-Branched dibasic acid metabolism	map00660	ec:4.1.3.17 - aldolase, ec:6.2.1.5 - ligase (ADP-forming)	1, 6	TR52407|c0_g1_i2, C967348, TR41874|c0_g1_i1, Mj_1_GCCAAT_L005_R1_001_(paired)_trimmed_(paired)_contig_2824, TR72803|c1_g1_i3, Mj_1_GCCAAT_L005_R1_001_(paired)_trimmed_(paired)_contig_1215, TR72803|c1_g1_i6	2	22	9.09091
Propanoate metabolism	map00640	ec:6.4.1.2 - carboxylase, ec:6.2.1.1 - ligase, ec:1.1.1.27 - dehydrogenase, ec:1.3.3.6 - oxidase, ec:6.2.1.5 - ligase (ADP-forming)	1, 2, 2, 1, 6	TR78089|c0_g6_i4, TR74015|c0_g1_i1, TR60612|c0_g1_i2, TR69387|c0_g2_i1, TR66562|c0_g1_i2, TR76479|c1_g2_i3, C967348, TR41874|c0_g1_i1, Mj_1_GCCAAT_L005_R1_001_(paired)_trimmed_(paired)_contig_2824, TR72803|c1_g1_i3, Mj_1_GCCAAT_L005_R1_001_(paired)_trimmed_(paired)_contig_1215, TR72803|c1_g1_i6	5	55	9.09091
N-Glycan biosynthesis	map00510	ec:2.4.1.101 - 2-beta-N-acetylglucosaminyltransferase, ec:2.4.1.117 - beta-glucosyltransferase, ec:2.7.1.108 - kinase	2, 1, 1	TR60007|c0_g1_i4, TR60007|c0_g1_i1, TR68350|c0_g1_i2, TR71834|c0_g1_i5	3	34	8.82353
Ether lipid metabolism	map00565	ec:3.1.4.4 - D, ec:3.1.3.4 - phosphatase	2, 3	TR75009|c1_g5_i5, Mj_1_GCCAAT_L005_R1_001_(paired)_trimmed_(paired)_contig_7308, TR63244|c0_g1_i3, TR78246|c0_g2_i6, scaffold12835	2	23	8.69565
Various types of N-glycan biosynthesis	map00513	ec:2.4.1.101 - 2-beta-N-acetylglucosaminyltransferase, ec:3.2.1.52 - hexosaminidase	2, 1	TR60007|c0_g1_i4, TR60007|c0_g1_i1, Mj_1_GCCAAT_L005_R1_001_(paired)_trimmed_(paired)_contig_4518	2	23	8.69565
D-Glutamine and D-glutamate metabolism	map00471	ec:1.4.1.3 - dehydrogenase [NAD(P)+]	4	Mj_1_GCCAAT_L005_R1_001_(paired)_trimmed_(paired)_contig_11806, scaffold12409, TR70011|c0_g1_i2, TR79010|c1_g4_i8	1	12	8.33333
Valine, leucine and isoleucine degradation	map00280	ec:2.6.1.42 - transaminase, ec:4.1.3.4 - lyase, ec:1.2.3.1 - oxidase	3, 1, 3	TR45202|c0_g1_i1, TR66612|c0_g1_i1, Mj_1_GCCAAT_L005_R1_001_(paired)_trimmed_(paired)_contig_1457, TR75912|c0_g1_i2, Mj_1_GCCAAT_L005_R1_001_(paired)_trimmed_(paired)_contig_403, TR76423|c1_g1_i1, TR76423|c1_g1_i9	3	36	8.33333
Nitrogen metabolism	map00910	ec:3.5.5.1 - acetonitrilase, ec:4.2.1.1 - anhydrase, ec:1.4.1.3 - dehydrogenase [NAD(P)+]	2, 4, 4	TR65769|c0_g2_i2, TR70893|c0_g1_i2, TR75423|c1_g1_i2, Mj_1_GCCAAT_L005_R1_001_(paired)_trimmed_(paired)_contig_11451, TR65040|c1_g1_i4, TR75423|c1_g1_i1, Mj_1_GCCAAT_L005_R1_001_(paired)_trimmed_(paired)_contig_11806, scaffold12409, TR70011|c0_g1_i2, TR79010|c1_g4_i8	3	37	8.10811
Aminobenzoate degradation	map00627	ec:3.5.1.4 - acylamidase, ec:4.2.1.84 - hydratase, ec:3.5.5.1 - acetonitrilase, ec:1.14.14.1 - monooxygenase	1, 1, 2, 3	Mj_1_GCCAAT_L005_R1_001_(paired)_trimmed_(paired)_contig_4448, TR71437|c1_g4_i1, TR65769|c0_g2_i2, TR70893|c0_g1_i2, TR56925|c0_g1_i1, Mj_1_GCCAAT_L005_R1_001_(paired)_trimmed_(paired)_contig_11045, TR58680|c0_g1_i4	4	51	7.84314
Starch and sucrose metabolism	map00500	ec:3.6.1.9 - diphosphatase, ec:3.2.1.20 - maltase, ec:2.7.7.27 - adenylyltransferase, ec:2.7.1.2 - glucokinase (phosphorylating), ec:3.2.1.39 - endo-1,3-beta-D-glucosidase, ec:2.7.1.4 - fructokinase (phosphorylating)	5, 2, 3, 1, 1, 2	Mj_1_GCCAAT_L005_R1_001_(paired)_trimmed_(paired)_contig_13294, TR56346|c0_g1_i1, TR65010|c4_g1_i1, Mj_1_GCCAAT_L005_R1_001_(paired)_trimmed_(paired)_contig_21402, TR62858|c0_g1_i3, TR75132|c0_g1_i1, TR75132|c0_g1_i5, TR77706|c0_g2_i2, Mj_1_GCCAAT_L005_R1_001_(paired)_trimmed_(paired)_contig_14842, TR77706|c0_g2_i1, TR73457|c2_g2_i2, TR76476|c0_g2_i4, TR73457|c2_g2_i2, TR77573|c0_g1_i11	6	77	7.79221
Aflatoxin biosynthesis	map00254	ec:6.4.1.2 - carboxylase	1	TR78089|c0_g6_i4	1	13	7.69231
Linoleic acid metabolism	map00591	ec:1.14.14.1 - monooxygenase	3	TR56925|c0_g1_i1, Mj_1_GCCAAT_L005_R1_001_(paired)_trimmed_(paired)_contig_11045, TR58680|c0_g1_i4	1	13	7.69231
Phenazine biosynthesis	map00405	ec:4.1.3.27 - synthase	3	TR65260|c0_g2_i3, Mj_1_GCCAAT_L005_R1_001_(paired)_trimmed_(paired)_contig_11895, TR62850|c0_g2_i3	1	13	7.69231
Methane metabolism	map00680	ec:6.2.1.1 - ligase, ec:1.1.1.95 - dehydrogenase, ec:3.1.3.3 - phosphatase, ec:2.1.2.1 - hydroxymethyltransferase, ec:1.1.1.29 - dehydrogenase, ec:2.7.1.11 - phosphohexokinase	2, 2, 1, 1, 1, 2	TR74015|c0_g1_i1, TR60612|c0_g1_i2, scaffold13038, TR60354|c1_g1_i1, TR79656|c2_g2_i4, TR67243|c0_g2_i1, TR66973|c0_g2_i4, TR75056|c0_g1_i2, TR75056|c0_g1_i4	6	82	7.31707
Valine, leucine and isoleucine biosynthesis	map00290	ec:2.6.1.42 - transaminase	3	TR45202|c0_g1_i1, TR66612|c0_g1_i1, Mj_1_GCCAAT_L005_R1_001_(paired)_trimmed_(paired)_contig_1457	1	14	7.14286
Arginine and proline metabolism	map00330	ec:3.5.1.4 - acylamidase, ec:2.6.1.1 - transaminase, ec:3.5.3.12 - deiminase, ec:1.14.11.2 - 4-dioxygenase, ec:3.4.11.5 - aminopeptidase	1, 7, 1, 1, 2	Mj_1_GCCAAT_L005_R1_001_(paired)_trimmed_(paired)_contig_4448, TR69989|c1_g1_i2, TR77327|c0_g1_i3, Mj_1_GCCAAT_L005_R1_001_(paired)_trimmed_(paired)_contig_8600, TR64435|c0_g1_i1, TR69787|c0_g1_i2, TR77327|c0_g1_i4, TR69997|c0_g1_i1, TR64242|c0_g1_i3, TR53281|c0_g2_i1, TR67460|c0_g1_i1, TR65933|c0_g2_i2	5	86	5.81395
Butanoate metabolism	map00650	ec:1.1.1.36 - reductase, ec:2.6.1.96 - transaminase, ec:4.1.3.4 - lyase	1, 1, 1	TR65807|c0_g1_i2, Mj_1_GCCAAT_L005_R1_001_(paired)_trimmed_(paired)_contig_15471, TR75912|c0_g1_i2	3	55	5.45455
Biotin metabolism	map00780	ec:1.1.1.100 - reductase	3	TR65448|c1_g1_i1, TR65448|c0_g1_i3, TR74183|c1_g2_i1	1	20	5
Chlorocyclohexane and chlorobenzene degradation	map00361	ec:5.5.1.1 - cycloisomerase	3	TR63637|c0_g1_i3, TR64393|c0_g1_i1, TR64393|c0_g1_i2	1	21	4.7619
Porphyrin and chlorophyll metabolism	map00860	ec:4.99.1.1 - ferrochelatase, ec:1.3.1.33 - reductase, ec:1.3.3.4 - oxidase, ec:6.1.1.17 - ligase, ec:2.4.1.17 - 1-naphthol glucuronyltransferase	9, 3, 1, 3, 6	TR62045|c0_g1_i1, TR66672|c0_g2_i6, TR68890|c0_g2_i2, TR68890|c1_g2_i6, TR46228|c0_g2_i2, TR46228|c0_g2_i3, TR46228|c0_g2_i5, TR68890|c2_g1_i12, TR68890|c0_g2_i1, TR60956|c0_g1_i1, TR60956|c0_g1_i5, TR60956|c0_g1_i3, TR75782|c0_g3_i7, TR74385|c0_g1_i3, Mj_1_GCCAAT_L005_R1_001_(paired)_trimmed_(paired)_contig_5249, TR74385|c0_g1_i2, TR77567|c1_g1_i1, TR55321|c0_g1_i1, TR77567|c1_g1_i2, TR77567|c1_…	5	105	4.7619
Pentose and glucuronate interconversions	map00040	ec:3.2.1.15 - pectin depolymerase (ambiguous), ec:3.1.1.11 - pectin demethoxylase, ec:2.4.1.17 - 1-naphthol glucuronyltransferase	1, 4, 6	TR55915|c0_g1_i1, Mj_1_GCCAAT_L005_R1_001_(paired)_trimmed_(paired)_contig_15585, TR51448|c0_g1_i1, TR76339|c1_g1_i1, TR73881|c0_g1_i1, TR77567|c1_g1_i1, TR55321|c0_g1_i1, TR77567|c1_g1_i2, TR77567|c1_g1_i4, Mj_1_GCCAAT_L005_R1_001_(paired)_trimmed_(paired)_contig_466, TR55751|c0_g1_i1	3	67	4.47761
Fructose and mannose metabolism	map00051	ec:2.7.7.13 - guanylyltransferase, ec:2.7.1.11 - phosphohexokinase, ec:2.7.1.4 - fructokinase (phosphorylating)	6, 2, 2	TR69756|c0_g1_i1, TR68543|c0_g1_i7, TR69756|c0_g1_i2, TR69756|c0_g1_i4, scaffold10339, scaffold10340, TR75056|c0_g1_i2, TR75056|c0_g1_i4, TR73457|c2_g2_i2, TR77573|c0_g1_i11	3	75	4
Toluene degradation	map00623	ec:5.5.1.1 - cycloisomerase	3	TR63637|c0_g1_i3, TR64393|c0_g1_i1, TR64393|c0_g1_i2	1	25	4
Lysine degradation	map00310	ec:2.3.1.61 - succinyltransferase, ec:1.14.11.4 - 5-dioxygenase	1, 1	TR72387|c0_g1_i5, C968696	2	53	3.77358
Polyketide sugar unit biosynthesis	map00523	ec:1.1.1.133 - reductase	3	TR54510|c0_g1_i2, TR54510|c0_g1_i3, TR54510|c0_g1_i4	1	27	3.7037
Pentose phosphate pathway	map00030	ec:1.1.1.44 - dehydrogenase (NADP+-dependent, decarboxylating), ec:2.7.1.11 - phosphohexokinase	2, 2	Mj_1_GCCAAT_L005_R1_001_(paired)_trimmed_(paired)_contig_6612, TR74554|c0_g1_i6, TR75056|c0_g1_i2, TR75056|c0_g1_i4	2	55	3.63636
Neomycin, kanamycin and gentamicin biosynthesis	map00524	ec:2.7.1.2 - glucokinase (phosphorylating)	1	TR73457|c2_g2_i2	1	28	3.57143
Flavone and flavonol biosynthesis	map00944	ec:1.14.14.81 - 3',5'-hydroxylase	1	TR68174|c0_g1_i1	1	32	3.125
Benzoate degradation	map00362	ec:5.5.1.1 - cycloisomerase, ec:4.1.3.17 - aldolase	3, 1	TR63637|c0_g1_i3, TR64393|c0_g1_i1, TR64393|c0_g1_i2, TR52407|c0_g1_i2	2	69	2.89855
beta-Alanine metabolism	map00410	ec:1.3.3.6 - oxidase	1	TR76479|c1_g2_i3	1	37	2.7027
Carotenoid biosynthesis	map00906	ec:1.2.3.14 - oxidase	1	TR74941|c1_g2_i1	1	37	2.7027
Histidine metabolism	map00340	ec:2.6.1.9 - transaminase	2	TR69997|c0_g1_i1, TR69989|c1_g1_i2	1	38	2.63158

## Sheet: TransM8_KEGG
Table S13 KEGG pathway mapping of transcript modules sharing high correlation coefficient (PCC > 0.7) with the identified metabolite modules in Mallotus japonicus.
Pathway	Pathway ID	Enzyme	#Seqs of Enzyme	Seqs	#Enzs in Pathway	#KEGG Enzymes	Ratio of enzymes in our sample in kegg enzymes (%)
Drug metabolism - cytochrome P450	map00982	ec:1.2.1.5 - dehydrogenase [NAD(P)+], ec:1.2.3.1 - oxidase, ec:2.4.1.17 - 1-naphthol glucuronyltransferase, ec:1.14.14.1 - monooxygenase, ec:1.1.1.1 - dehydrogenase, ec:1.14.13.8 - monooxygenase, ec:2.5.1.18 - transferase	2, 2, 3, 1, 4, 3, 5	TR59926|c1_g1_i4, TR59926|c1_g1_i3, TR63984|c0_g1_i4, Mj_1_GCCAAT_L005_R1_001_(paired)_trimmed_(paired)_contig_402, Mj_1_GCCAAT_L005_R1_001_(paired)_trimmed_(paired)_contig_10159, TR70566|c1_g1_i1, TR76014|c1_g1_i2, Mj_1_GCCAAT_L005_R1_001_(paired)_trimmed_(paired)_contig_21912, scaffold13198, TR56627|c0_g1_i1, TR59702|c0_g1_i1, TR70956|c0_g2_i6, Mj_1_GCCAAT_L005_R1_001_(paired)_trimmed_(paired)_…	7	8	87.5
Other glycan degradation	map00511	ec:3.2.1.51 - alpha-fucosidase, ec:3.2.1.23 - lactase (ambiguous), ec:3.2.1.25 - mannanase, ec:3.2.1.52 - hexosaminidase, ec:3.2.1.24 - alpha-D-mannosidase	1, 13, 5, 6, 1	TR75222|c0_g1_i1, TR65049|c0_g1_i2, Mj_1_GCCAAT_L005_R1_001_(paired)_trimmed_(paired)_contig_88, TR69917|c2_g1_i5, TR69917|c2_g1_i2, Mj_1_GCCAAT_L005_R1_001_(paired)_trimmed_(paired)_contig_3748, TR54199|c0_g1_i1, TR54199|c0_g1_i2, TR76648|c3_g1_i3, TR76648|c3_g1_i2, TR76063|c0_g1_i1, TR76063|c0_g1_i3, scaffold1457, TR65049|c0_g1_i1, TR54712|c2_g3_i4, C939802, TR47738|c0_g2_i3, TR53952|c0_g1_i4, …	5	9	55.5556
Metabolism of xenobiotics by cytochrome P450	map00980	ec:1.2.1.5 - dehydrogenase [NAD(P)+], ec:2.4.1.17 - 1-naphthol glucuronyltransferase, ec:1.14.14.1 - monooxygenase, ec:1.1.1.1 - dehydrogenase, ec:2.5.1.18 - transferase	2, 3, 1, 4, 5	TR59926|c1_g1_i4, TR59926|c1_g1_i3, Mj_1_GCCAAT_L005_R1_001_(paired)_trimmed_(paired)_contig_10159, TR70566|c1_g1_i1, TR76014|c1_g1_i2, Mj_1_GCCAAT_L005_R1_001_(paired)_trimmed_(paired)_contig_21912, scaffold13198, TR56627|c0_g1_i1, TR59702|c0_g1_i1, TR70956|c0_g2_i6, Mj_1_GCCAAT_L005_R1_001_(paired)_trimmed_(paired)_contig_32966, TR55115|c0_g1_i2, TR78780|c1_g3_i1, TR55115|c0_g1_i3, TR75298|c0_g…	5	10	50
Fatty acid biosynthesis	map00061	ec:2.3.1.86 - synthase system, ec:2.3.1.180 - synthase III, ec:6.2.1.3 - ligase, ec:2.3.1.85 - synthase system, ec:2.3.1.41 - synthase I, ec:1.1.1.100 - reductase, ec:1.14.19.2 - 9-desaturase, ec:1.3.1.9 - reductase (NADH)	4, 2, 1, 9, 2, 9, 1, 3	Mj_1_GCCAAT_L005_R1_001_(paired)_trimmed_(paired)_contig_7358, Mj_1_GCCAAT_L005_R1_001_(paired)_trimmed_(paired)_contig_7360, TR69540|c2_g2_i1, TR74384|c1_g1_i4, TR66829|c0_g1_i1, Mj_1_GCCAAT_L005_R1_001_(paired)_trimmed_(paired)_contig_6456, Mj_1_GCCAAT_L005_R1_001_(paired)_trimmed_(paired)_contig_5617, TR66829|c0_g1_i1, Mj_1_GCCAAT_L005_R1_001_(paired)_trimmed_(paired)_contig_6456, TR46602|c0_g…	8	17	47.0588
Glycosaminoglycan biosynthesis - heparan sulfate / heparin	map00534	ec:2.4.1.223 - 4-alpha-N-acetylglucosaminyltransferase, ec:2.4.2.26 - xylosyltransferase, ec:2.4.1.135 - 3-beta-glucuronosyltransferase, ec:2.4.1.224 - 4-alpha-N-acetylglucosaminyltransferase, ec:2.4.1.134 - 3-beta-galactosyltransferase	1, 3, 3, 1, 10	TR71800|c1_g1_i1, TR64577|c1_g2_i1, TR76014|c1_g1_i2, TR64577|c0_g1_i2, Mj_1_GCCAAT_L005_R1_001_(paired)_trimmed_(paired)_contig_10159, TR71716|c0_g1_i1, TR75811|c0_g1_i1, TR61954|c0_g1_i3, TR72340|c2_g2_i2, TR72351|c0_g2_i2, TR72340|c2_g2_i1, TR50525|c0_g1_i1, TR61182|c1_g1_i4, TR58363|c0_g1_i1, Mj_1_GCCAAT_L005_R1_001_(paired)_trimmed_(paired)_contig_45445, TR72351|c1_g1_i2, TR54521|c0_g2_i1, T…	5	11	45.4545
alpha-Linolenic acid metabolism	map00592	ec:1.3.1.42 - reductase, ec:1.1.1.1 - dehydrogenase, ec:4.2.1.17 - hydratase, ec:2.1.1.141 - O-methyltransferase, ec:3.1.1.4 - A2	1, 4, 1, 4, 1	C935832, scaffold13198, TR56627|c0_g1_i1, TR59702|c0_g1_i1, TR70956|c0_g2_i6, TR58596|c0_g1_i2, TR65622|c0_g2_i1, TR64817|c0_g1_i3, Mj_1_GCCAAT_L005_R1_001_(paired)_trimmed_(paired)_contig_41700, TR47786|c0_g1_i1, TR57176|c0_g1_i1	5	12	41.6667
Glycolysis / Gluconeogenesis	map00010	ec:4.1.1.32 - carboxykinase (GTP), ec:1.2.1.3 - dehydrogenase (NAD+), ec:4.1.1.49 - carboxykinase (ATP), ec:2.7.1.90 - 1-phosphotransferase, ec:1.2.1.5 - dehydrogenase [NAD(P)+], ec:4.2.1.11 - hydratase, ec:2.7.1.2 - glucokinase (phosphorylating), ec:1.1.1.2 - dehydrogenase (NADP+), ec:5.3.1.1 - isomerase, ec:2.7.1.11 - phosphohexokinase, ec:1.2.4.1 - dehydrogenase (acetyl-transferring), ec:5.1.3…	1, 2, 3, 5, 2, 1, 4, 3, 1, 7, 2, 4, 2, 3, 3, 4, 3, 1, 2	TR58695|c0_g1_i3, TR59926|c1_g1_i4, TR59926|c1_g1_i3, TR73014|c3_g2_i5, TR58695|c0_g1_i3, TR73014|c3_g2_i4, Mj_1_GCCAAT_L005_R1_001_(paired)_trimmed_(paired)_contig_4805, TR65276|c0_g1_i2, TR67850|c0_g2_i1, TR64724|c0_g1_i2, TR65276|c0_g1_i1, TR59926|c1_g1_i4, TR59926|c1_g1_i3, TR77437|c0_g1_i6, Mj_1_GCCAAT_L005_R1_001_(paired)_trimmed_(paired)_contig_14748, TR71694|c1_g6_i7, TR73457|c1_g1_i5, TR…	19	47	40.4255
Carbon fixation in photosynthetic organisms	map00710	ec:5.1.3.1 - 3-epimerase, ec:4.1.1.49 - carboxykinase (ATP), ec:1.1.1.40 - dehydrogenase (oxaloacetate-decarboxylating) (NADP+), ec:1.1.1.37 - dehydrogenase, ec:5.3.1.1 - isomerase, ec:1.1.1.39 - dehydrogenase (decarboxylating), ec:2.6.1.1 - transaminase, ec:1.2.1.12 - dehydrogenase (phosphorylating), ec:1.2.1.59 - dehydrogenase (NAD(P)+) (phosphorylating), ec:4.1.2.13 - aldolase	1, 3, 2, 6, 1, 2, 1, 3, 3, 1	TR56927|c0_g1_i1, TR73014|c3_g2_i5, TR58695|c0_g1_i3, TR73014|c3_g2_i4, scaffold1315, TR69958|c0_g1_i1, TR57784|c0_g1_i1, Mj_1_GCCAAT_L005_R1_001_(paired)_trimmed_(paired)_contig_4352, TR55944|c0_g1_i2, Mj_1_GCCAAT_L005_R1_001_(paired)_trimmed_(paired)_contig_4144, TR55944|c1_g1_i1, TR55944|c1_g1_i3, TR47653|c0_g1_i1, scaffold1315, TR69958|c0_g1_i1, TR71621|c0_g2_i4, TR51712|c0_g2_i1, Mj_1_GCCAAT…	10	25	40
Drug metabolism - other enzymes	map00983	ec:2.7.1.48 - kinase, ec:3.1.1.1 - ali-esterase, ec:2.3.1.5 - N-acetyltransferase, ec:2.4.1.17 - 1-naphthol glucuronyltransferase, ec:2.7.1.21 - kinase, ec:2.7.4.14 - kinase, ec:2.5.1.18 - transferase	10, 40, 3, 3, 3, 10, 5	Mj_1_GCCAAT_L005_R1_001_(paired)_trimmed_(paired)_contig_474, TR67910|c0_g1_i3, TR69157|c2_g1_i2, scaffold11045, TR67738|c1_g1_i2, TR67738|c1_g1_i5, TR69157|c2_g1_i4, TR71410|c0_g1_i1, TR69157|c2_g1_i1, TR71410|c0_g1_i3, TR66054|c3_g1_i2, TR77796|c2_g1_i5, Mj_1_GCCAAT_L005_R1_001_(paired)_trimmed_(paired)_contig_11891, TR58185|c0_g3_i1, TR77796|c2_g1_i3, TR65541|c0_g1_i8, TR63179|c0_g1_i1, TR5389…	7	18	38.8889
Glycosphingolipid biosynthesis - globo and isoglobo series	map00603	ec:2.4.99.4 - alpha-2,3-sialyltransferase, ec:2.4.1.152 - 3-alpha-L-fucosyltransferase, ec:3.2.1.22 - melibiase, ec:2.4.1.69 - 1 galactoside alpha-(1,2)-fucosyltransferase, ec:3.2.1.52 - hexosaminidase	1, 2, 3, 3, 6	TR74801|c0_g1_i1, Mj_1_GCCAAT_L005_R1_001_(paired)_trimmed_(paired)_contig_20494, TR68740|c0_g1_i1, TR76418|c0_g2_i1, TR57609|c0_g1_i1, TR59969|c0_g2_i2, TR72096|c0_g1_i1, TR68508|c0_g1_i1, TR72096|c0_g1_i2, TR64776|c2_g1_i1, TR64776|c2_g1_i4, TR77354|c5_g1_i1, scaffold12088, TR64776|c2_g1_i3, TR77354|c5_g1_i3	5	13	38.4615
Glycosphingolipid biosynthesis - ganglio series	map00604	ec:2.4.99.4 - alpha-2,3-sialyltransferase, ec:3.2.1.23 - lactase (ambiguous), ec:3.2.1.52 - hexosaminidase	1, 13, 6	TR74801|c0_g1_i1, TR65049|c0_g1_i2, Mj_1_GCCAAT_L005_R1_001_(paired)_trimmed_(paired)_contig_88, TR69917|c2_g1_i5, TR69917|c2_g1_i2, Mj_1_GCCAAT_L005_R1_001_(paired)_trimmed_(paired)_contig_3748, TR54199|c0_g1_i1, TR54199|c0_g1_i2, TR76648|c3_g1_i3, TR76648|c3_g1_i2, TR76063|c0_g1_i1, TR76063|c0_g1_i3, scaffold1457, TR65049|c0_g1_i1, TR64776|c2_g1_i1, TR64776|c2_g1_i4, TR77354|c5_g1_i1, scaffold1…	3	8	37.5
Mannose type O-glycan biosynthesis	map00515	ec:2.4.1.152 - 3-alpha-L-fucosyltransferase, ec:2.4.1.135 - 3-beta-glucuronosyltransferase, ec:2.4.1.109 - mannosyltransferase	2, 3, 1	Mj_1_GCCAAT_L005_R1_001_(paired)_trimmed_(paired)_contig_20494, TR68740|c0_g1_i1, Mj_1_GCCAAT_L005_R1_001_(paired)_trimmed_(paired)_contig_10159, TR71716|c0_g1_i1, TR75811|c0_g1_i1, TR68331|c0_g1_i1	3	8	37.5
Steroid biosynthesis	map00100	ec:1.3.1.21 - reductase, ec:1.1.1.170 - 3-dehydrogenase (decarboxylating), ec:2.1.1.41 - 24-C-methyltransferase, ec:5.5.1.9 - cycloisomerase, ec:1.14.18.9 - monooxygenase, ec:1.14.14.17 - monooxygenase, ec:5.4.99.8 - synthase, ec:5.3.3.5 - Delta-isomerase, ec:1.3.1.72 - reductase	1, 3, 2, 1, 5, 1, 1, 2, 4	Mj_1_GCCAAT_L005_R1_001_(paired)_trimmed_(paired)_contig_20972, TR66090|c0_g1_i3, TR66090|c0_g1_i2, TR66090|c0_g1_i1, Mj_1_GCCAAT_L005_R1_001_(paired)_trimmed_(paired)_contig_4920, TR68571|c0_g1_i1, TR59464|c0_g1_i1, TR54962|c0_g1_i1, TR68656|c0_g1_i2, TR62459|c0_g1_i1, TR62459|c1_g2_i3, TR62459|c1_g2_i4, Mj_1_GCCAAT_L005_R1_001_(paired)_trimmed_(paired)_contig_5528, TR78484|c0_g1_i2, TR58994|c0_…	9	25	36
Various types of N-glycan biosynthesis	map00513	ec:2.4.1.101 - 2-beta-N-acetylglucosaminyltransferase, ec:2.4.1.65 - 4-alpha-L-fucosyltransferase, ec:2.4.1.214 - 3-alpha-L-fucosyltransferase, ec:2.4.1.143 - 2-beta-N-acetylglucosaminyltransferase, ec:3.2.1.52 - hexosaminidase, ec:3.2.1.114 - 1,3-1,6-alpha-mannosidase, ec:2.4.99.18 - glycotransferase, ec:3.2.1.113 - 1,2-alpha-mannosidase	1, 2, 2, 1, 6, 1, 1, 1	TR64128|c0_g1_i1, TR67555|c0_g1_i4, TR66354|c0_g1_i4, Mj_1_GCCAAT_L005_R1_001_(paired)_trimmed_(paired)_contig_20494, TR68740|c0_g1_i1, TR64128|c0_g1_i1, TR64776|c2_g1_i1, TR64776|c2_g1_i4, TR77354|c5_g1_i1, scaffold12088, TR64776|c2_g1_i3, TR77354|c5_g1_i3, TR78905|c0_g1_i1, TR64711|c0_g1_i1, Mj_1_GCCAAT_L005_R1_001_(paired)_trimmed_(paired)_contig_10315	8	23	34.7826
Lipoic acid metabolism	map00785	ec:2.8.1.8 - synthase	3	TR66959|c0_g1_i3, TR70597|c0_g1_i5, TR66959|c0_g1_i6	1	3	33.3333
Phenylalanine, tyrosine and tryptophan biosynthesis	map00400	ec:4.1.1.48 - synthase, ec:2.6.1.57 - transaminase, ec:1.1.1.282 - dehydrogenase, ec:2.6.1.5 - transaminase, ec:2.6.1.79 - aminotransferase, ec:5.4.99.5 - mutase, ec:2.6.1.1 - transaminase, ec:1.1.1.25 - dehydrogenase, ec:4.2.1.10 - dehydratase, ec:2.5.1.54 - synthase, ec:2.6.1.9 - transaminase, ec:4.2.1.20 - synthase, ec:2.6.1.78 - aminotransferase	1, 1, 6, 1, 1, 2, 1, 6, 6, 1, 1, 1, 1	TR73209|c0_g1_i1, TR71621|c0_g2_i4, Mj_1_GCCAAT_L005_R1_001_(paired)_trimmed_(paired)_contig_701, TR74995|c1_g1_i4, TR76397|c0_g1_i10, TR76397|c0_g1_i5, TR74995|c0_g1_i1, TR74995|c1_g1_i1, TR71621|c0_g2_i4, TR71621|c0_g2_i4, TR60163|c0_g1_i6, Mj_1_GCCAAT_L005_R1_001_(paired)_trimmed_(paired)_contig_574, TR71621|c0_g2_i4, Mj_1_GCCAAT_L005_R1_001_(paired)_trimmed_(paired)_contig_701, TR74995|c1_g1_…	13	39	33.3333
Photosynthesis	map00195	ec:7.1.2.2 - two-sector ATPase	12	Mj_1_GCCAAT_L005_R1_001_(paired)_trimmed_(paired)_contig_11509, TR65179|c0_g2_i1, TR37693|c0_g3_i1, TR65179|c0_g2_i2, C964844, Mj_1_GCCAAT_L005_R1_001_(paired)_trimmed_(paired)_contig_22806, TR60088|c0_g1_i2, TR61392|c0_g1_i1, TR43064|c0_g1_i1, TR64248|c4_g1_i1, Mj_1_GCCAAT_L005_R1_001_(paired)_trimmed_(paired)_contig_8364, TR49279|c1_g1_i1	1	3	33.3333
Citrate cycle (TCA cycle)	map00020	ec:4.1.1.32 - carboxykinase (GTP), ec:4.1.1.49 - carboxykinase (ATP), ec:1.1.1.37 - dehydrogenase, ec:6.2.1.5 - ligase (ADP-forming), ec:1.3.5.1 - dehydrogenase, ec:1.2.4.1 - dehydrogenase (acetyl-transferring), ec:2.3.3.8 - citrate synthase, ec:4.2.1.3 - hydratase	1, 3, 6, 3, 1, 2, 2, 1	TR58695|c0_g1_i3, TR73014|c3_g2_i5, TR58695|c0_g1_i3, TR73014|c3_g2_i4, TR57784|c0_g1_i1, Mj_1_GCCAAT_L005_R1_001_(paired)_trimmed_(paired)_contig_4352, TR55944|c0_g1_i2, Mj_1_GCCAAT_L005_R1_001_(paired)_trimmed_(paired)_contig_4144, TR55944|c1_g1_i1, TR55944|c1_g1_i3, Mj_1_GCCAAT_L005_R1_001_(paired)_trimmed_(paired)_contig_2470, TR67801|c0_g1_i1, TR72803|c1_g1_i10, Mj_1_GCCAAT_L005_R1_001_(pair…	8	25	32
Phosphatidylinositol signaling system	map04070	ec:2.7.1.67 - 4-kinase, ec:2.7.8.11 - 3-phosphatidyltransferase, ec:3.1.3.67 - 3-phosphatase, ec:2.7.1.107 - kinase (ATP), ec:3.1.3.25 - phosphatase, ec:3.1.4.11 - phospholipase C, ec:3.1.3.36 - 5-phosphatase, ec:2.7.11.13 - kinase C, ec:2.7.1.150 - 5-kinase	2, 1, 2, 1, 1, 4, 1, 3, 4	TR78523|c0_g2_i2, TR65134|c0_g1_i2, TR65382|c0_g3_i11, TR52392|c0_g1_i2, Mj_1_GCCAAT_L005_R1_001_(paired)_trimmed_(paired)_contig_16706, TR72887|c0_g2_i1, Mj_1_GCCAAT_L005_R1_001_(paired)_trimmed_(paired)_contig_8059, TR71447|c2_g2_i2, TR71447|c2_g2_i4, TR47929|c0_g1_i1, TR71447|c2_g2_i5, TR76474|c0_g1_i3, Mj_1_GCCAAT_L005_R1_001_(paired)_trimmed_(paired)_contig_10585, TR70671|c0_g1_i1, TR75704|c…	9	29	31.0345
Oxidative phosphorylation	map00190	ec:7.1.2.2 - two-sector ATPase, ec:1.3.5.1 - dehydrogenase, ec:7.1.1.2 - reductase (H+-translocating)	12, 1, 10	Mj_1_GCCAAT_L005_R1_001_(paired)_trimmed_(paired)_contig_11509, TR65179|c0_g2_i1, TR37693|c0_g3_i1, TR65179|c0_g2_i2, C964844, Mj_1_GCCAAT_L005_R1_001_(paired)_trimmed_(paired)_contig_22806, TR60088|c0_g1_i2, TR61392|c0_g1_i1, TR43064|c0_g1_i1, TR64248|c4_g1_i1, Mj_1_GCCAAT_L005_R1_001_(paired)_trimmed_(paired)_contig_8364, TR49279|c1_g1_i1, Mj_1_GCCAAT_L005_R1_001_(paired)_trimmed_(paired)_conti…	3	11	27.2727
Galactose metabolism	map00052	ec:3.2.1.26 - invertase, ec:2.7.7.64 - uridylyltransferase, ec:2.4.1.82 - galactosyltransferase, ec:3.2.1.20 - maltase, ec:2.7.1.2 - glucokinase (phosphorylating), ec:3.2.1.23 - lactase (ambiguous), ec:3.2.1.22 - melibiase, ec:2.7.1.11 - phosphohexokinase, ec:2.4.1.67 - galactosyltransferase, ec:5.1.3.3 - 1-epimerase, ec:2.7.7.10 - uridylyltransferase, ec:2.7.1.1 - hexokinase type IV glucokinase,…	6, 1, 1, 4, 4, 13, 3, 7, 1, 4, 1, 3, 1	TR56189|c0_g2_i1, Mj_1_GCCAAT_L005_R1_001_(paired)_trimmed_(paired)_contig_3521, Mj_1_GCCAAT_L005_R1_001_(paired)_trimmed_(paired)_contig_20820, TR75706|c0_g1_i1, TR58315|c0_g1_i1, TR73023|c0_g1_i1, TR68667|c0_g1_i1, TR76418|c0_g2_i1, TR56189|c0_g2_i1, Mj_1_GCCAAT_L005_R1_001_(paired)_trimmed_(paired)_contig_3521, Mj_1_GCCAAT_L005_R1_001_(paired)_trimmed_(paired)_contig_20820, TR58315|c0_g1_i1, M…	13	48	27.0833
Phenylpropanoid biosynthesis	map00940	ec:2.4.1.128 - glucosyltransferase, ec:1.1.1.195 - dehydrogenase, ec:1.2.1.44 - reductase, ec:1.11.1.7 - lactoperoxidase, ec:2.1.1.146 - O-methyltransferase, ec:3.2.1.21 - gentiobiase, ec:2.1.1.68 - O-methyltransferase, ec:6.2.1.12 - ligase	2, 3, 1, 19, 2, 12, 2, 6	TR79653|c2_g2_i6, TR79653|c2_g2_i8, Mj_1_GCCAAT_L005_R1_001_(paired)_trimmed_(paired)_contig_4734, TR63622|c0_g1_i1, TR42684|c0_g1_i1, TR76550|c0_g2_i1, TR70991|c1_g1_i1, TR56833|c1_g1_i1, TR60100|c0_g1_i1, TR59096|c0_g1_i1, TR60456|c0_g1_i1, TR61797|c1_g1_i2, TR63867|c0_g3_i3, Mj_1_GCCAAT_L005_R1_001_(paired)_trimmed_(paired)_contig_1238, TR75298|c0_g1_i2, TR63879|c0_g1_i1, scaffold12336, Mj_1_G…	8	30	26.6667
Sphingolipid metabolism	map00600	ec:3.1.4.12 - phosphodiesterase, ec:3.2.1.23 - lactase (ambiguous), ec:3.2.1.22 - melibiase, ec:2.3.1.50 - C-palmitoyltransferase, ec:3.5.1.23 - acylsphingosine deacylase, ec:2.3.1.24 - N-acyltransferase, ec:2.4.1.80 - glucosyltransferase	2, 13, 3, 2, 5, 1, 3	Mj_1_GCCAAT_L005_R1_001_(paired)_trimmed_(paired)_contig_33280, TR42593|c0_g2_i1, TR65049|c0_g1_i2, Mj_1_GCCAAT_L005_R1_001_(paired)_trimmed_(paired)_contig_88, TR69917|c2_g1_i5, TR69917|c2_g1_i2, Mj_1_GCCAAT_L005_R1_001_(paired)_trimmed_(paired)_contig_3748, TR54199|c0_g1_i1, TR54199|c0_g1_i2, TR76648|c3_g1_i3, TR76648|c3_g1_i2, TR76063|c0_g1_i1, TR76063|c0_g1_i3, scaffold1457, TR65049|c0_g1_i1,…	7	27	25.9259
Glycosaminoglycan biosynthesis - chondroitin sulfate / dermatan sulfate	map00532	ec:2.4.2.26 - xylosyltransferase, ec:2.4.1.135 - 3-beta-glucuronosyltransferase, ec:2.4.1.134 - 3-beta-galactosyltransferase	3, 3, 10	TR64577|c1_g2_i1, TR76014|c1_g1_i2, TR64577|c0_g1_i2, Mj_1_GCCAAT_L005_R1_001_(paired)_trimmed_(paired)_contig_10159, TR71716|c0_g1_i1, TR75811|c0_g1_i1, TR72340|c2_g2_i2, TR72351|c0_g2_i2, TR72340|c2_g2_i1, TR50525|c0_g1_i1, TR61182|c1_g1_i4, TR58363|c0_g1_i1, Mj_1_GCCAAT_L005_R1_001_(paired)_trimmed_(paired)_contig_45445, TR72351|c1_g1_i2, TR54521|c0_g2_i1, TR61036|c0_g1_i1	3	12	25
Glycosphingolipid biosynthesis - lacto and neolacto series	map00601	ec:2.4.99.4 - alpha-2,3-sialyltransferase, ec:2.4.1.152 - 3-alpha-L-fucosyltransferase, ec:2.4.1.65 - 4-alpha-L-fucosyltransferase, ec:2.4.1.69 - 1 galactoside alpha-(1,2)-fucosyltransferase	1, 2, 2, 3	TR74801|c0_g1_i1, Mj_1_GCCAAT_L005_R1_001_(paired)_trimmed_(paired)_contig_20494, TR68740|c0_g1_i1, TR67555|c0_g1_i4, TR66354|c0_g1_i4, TR72096|c0_g1_i1, TR68508|c0_g1_i1, TR72096|c0_g1_i2	4	16	25
N-Glycan biosynthesis	map00510	ec:2.4.1.101 - 2-beta-N-acetylglucosaminyltransferase, ec:2.4.1.267 - alpha-1,3-glucosyltransferase, ec:2.4.1.144 - 4-beta-N-acetylglucosaminyltransferase, ec:2.4.1.83 - beta-D-mannosyltransferase, ec:2.4.1.143 - 2-beta-N-acetylglucosaminyltransferase, ec:3.2.1.114 - 1,3-1,6-alpha-mannosidase, ec:2.4.99.18 - glycotransferase, ec:3.2.1.113 - 1,2-alpha-mannosidase	1, 4, 1, 1, 1, 1, 1, 1	TR64128|c0_g1_i1, TR64439|c2_g1_i1, TR68978|c0_g1_i1, TR68978|c0_g1_i2, TR64439|c2_g1_i2, Mj_1_GCCAAT_L005_R1_001_(paired)_trimmed_(paired)_contig_8256, Mj_1_GCCAAT_L005_R1_001_(paired)_trimmed_(paired)_contig_3827, TR64128|c0_g1_i1, TR78905|c0_g1_i1, TR64711|c0_g1_i1, Mj_1_GCCAAT_L005_R1_001_(paired)_trimmed_(paired)_contig_10315	8	34	23.5294
Starch and sucrose metabolism	map00500	ec:3.2.1.4 - endo-1,4-beta-D-glucanase, ec:3.2.1.26 - invertase, ec:3.6.1.9 - diphosphatase, ec:3.2.1.20 - maltase, ec:2.7.1.2 - glucokinase (phosphorylating), ec:3.1.3.12 - trehalose 6-phosphatase, ec:2.4.1.21 - synthase (glycosyl-transferring), ec:3.2.1.39 - endo-1,3-beta-D-glucosidase, ec:2.4.1.242 - glucosyltransferase, ec:2.4.1.12 - synthase (UDP-forming), ec:2.7.1.4 - fructokinase (phosphor…	5, 6, 8, 4, 4, 3, 3, 10, 2, 31, 6, 1, 3, 1, 4, 12, 3, 6	Mj_1_GCCAAT_L005_R1_001_(paired)_trimmed_(paired)_contig_833, TR66353|c0_g1_i1, TR75743|c2_g1_i2, Mj_1_GCCAAT_L005_R1_001_(paired)_trimmed_(paired)_contig_26584, Mj_1_GCCAAT_L005_R1_001_(paired)_trimmed_(paired)_contig_17448, TR56189|c0_g2_i1, Mj_1_GCCAAT_L005_R1_001_(paired)_trimmed_(paired)_contig_3521, Mj_1_GCCAAT_L005_R1_001_(paired)_trimmed_(paired)_contig_20820, TR75706|c0_g1_i1, TR58315|c0…	18	77	23.3766
Fatty acid elongation	map00062	ec:1.3.1.38 - reductase (NADPH), ec:4.2.1.17 - hydratase, ec:3.1.2.22 - hydrolase	2, 1, 2	TR64176|c0_g1_i2, TR64176|c0_g1_i1, TR58596|c0_g1_i2, TR78449|c2_g3_i3, TR78449|c2_g3_i4	3	13	23.0769
Glycerolipid metabolism	map00561	ec:2.3.1.20 - O-acyltransferase, ec:1.2.1.3 - dehydrogenase (NAD+), ec:2.4.1.46 - synthase, ec:1.1.1.2 - dehydrogenase (NADP+), ec:3.1.1.3 - lipase, ec:3.2.1.22 - melibiase, ec:2.7.1.107 - kinase (ATP), ec:3.1.1.23 - lipase, ec:3.1.1.26 - galactolipid lipase	2, 2, 2, 3, 6, 3, 1, 1, 4	Mj_1_GCCAAT_L005_R1_001_(paired)_trimmed_(paired)_contig_42721, scaffold14077, TR59926|c1_g1_i4, TR59926|c1_g1_i3, Mj_1_GCCAAT_L005_R1_001_(paired)_trimmed_(paired)_contig_15481, TR66571|c0_g1_i1, TR72994|c0_g2_i3, TR65081|c0_g1_i3, TR72994|c0_g2_i4, TR79517|c1_g4_i7, TR67171|c0_g1_i1, TR66959|c0_g1_i6, TR66959|c0_g1_i3, TR70597|c0_g1_i5, Mj_1_GCCAAT_L005_R1_001_(paired)_trimmed_(paired)_contig_1…	9	39	23.0769
Flavonoid biosynthesis	map00941	ec:1.14.20.4 - synthase, ec:1.14.14.82 - 3'-monooxygenase, ec:1.1.1.219 - 4-reductase, ec:2.3.1.170 - synthase, ec:1.14.14.81 - 3',5'-hydroxylase	1, 1, 7, 5, 1	Mj_1_GCCAAT_L005_R1_001_(paired)_trimmed_(paired)_contig_35722, Mj_1_GCCAAT_L005_R1_001_(paired)_trimmed_(paired)_contig_16402, TR61298|c0_g1_i2, TR76163|c1_g1_i6, TR67756|c0_g1_i2, TR67756|c0_g1_i3, TR76550|c0_g2_i1, TR66998|c0_g1_i6, TR70956|c0_g2_i6, TR62849|c0_g1_i1, TR62849|c0_g1_i3, Mj_1_GCCAAT_L005_R1_001_(paired)_trimmed_(paired)_contig_37580, TR42933|c0_g1_i1, TR79795|c0_g1_i5, Mj_1_GCCA…	5	22	22.7273
Tropane, piperidine and pyridine alkaloid biosynthesis	map00960	ec:2.1.1.53 - N-methyltransferase, ec:2.6.1.57 - transaminase, ec:2.6.1.5 - transaminase, ec:1.1.1.206 - reductase I, ec:2.6.1.1 - transaminase, ec:2.6.1.9 - transaminase	1, 1, 1, 2, 1, 1	TR64145|c0_g1_i2, TR71621|c0_g2_i4, TR71621|c0_g2_i4, TR68609|c1_g1_i2, TR68609|c1_g1_i4, TR71621|c0_g2_i4, TR71621|c0_g2_i4	6	27	22.2222
Cyanoamino acid metabolism	map00460	ec:3.5.5.1 - acetonitrilase, ec:2.1.2.1 - hydroxymethyltransferase, ec:1.14.14.37 - oxime monooxygenase, ec:4.2.1.65 - hydratase, ec:3.2.1.21 - gentiobiase, ec:3.5.5.4 - nitrilase	2, 1, 1, 2, 12, 2	TR51377|c0_g1_i1, TR70720|c2_g1_i5, TR49523|c0_g1_i1, TR27648|c0_g1_i1, TR51377|c0_g1_i1, TR71437|c0_g1_i8, TR68732|c1_g1_i4, Mj_1_GCCAAT_L005_R1_001_(paired)_trimmed_(paired)_contig_7, TR66614|c0_g1_i1, TR61207|c0_g1_i1, TR69847|c0_g1_i2, TR60689|c1_g1_i2, TR60689|c1_g1_i1, scaffold13442, Mj_1_GCCAAT_L005_R1_001_(paired)_trimmed_(paired)_contig_6518, TR65706|c0_g1_i1, TR75917|c0_g1_i2, TR68732|c…	6	29	20.6897
Fatty acid degradation	map00071	ec:1.2.1.3 - dehydrogenase (NAD+), ec:6.2.1.3 - ligase, ec:5.3.3.8 - isomerase, ec:1.14.14.1 - monooxygenase, ec:1.1.1.1 - dehydrogenase, ec:4.2.1.17 - hydratase	2, 1, 2, 1, 4, 1	TR59926|c1_g1_i4, TR59926|c1_g1_i3, Mj_1_GCCAAT_L005_R1_001_(paired)_trimmed_(paired)_contig_5617, TR64166|c0_g1_i2, TR58632|c0_g1_i1, Mj_1_GCCAAT_L005_R1_001_(paired)_trimmed_(paired)_contig_21912, scaffold13198, TR56627|c0_g1_i1, TR59702|c0_g1_i1, TR70956|c0_g2_i6, TR58596|c0_g1_i2	6	29	20.6897
Ascorbate and aldarate metabolism	map00053	ec:1.11.1.11 - peroxidase, ec:1.2.1.3 - dehydrogenase (NAD+), ec:2.7.7.64 - uridylyltransferase, ec:1.6.5.4 - reductase (NADH), ec:1.1.1.2 - dehydrogenase (NADP+), ec:2.4.1.17 - 1-naphthol glucuronyltransferase, ec:1.10.3.3 - oxidase, ec:1.1.3.8 - oxidase, ec:1.1.1.22 - 6-dehydrogenase	2, 2, 1, 2, 3, 3, 2, 2, 3	TR60163|c0_g1_i6, Mj_1_GCCAAT_L005_R1_001_(paired)_trimmed_(paired)_contig_574, TR59926|c1_g1_i4, TR59926|c1_g1_i3, TR68667|c0_g1_i1, TR65337|c0_g1_i1, Mj_1_GCCAAT_L005_R1_001_(paired)_trimmed_(paired)_contig_654, TR72994|c0_g2_i3, TR65081|c0_g1_i3, TR72994|c0_g2_i4, Mj_1_GCCAAT_L005_R1_001_(paired)_trimmed_(paired)_contig_10159, TR70566|c1_g1_i1, TR76014|c1_g1_i2, TR68791|c0_g1_i2, TR65548|c0_g1…	9	46	19.5652
Pyruvate metabolism	map00620	ec:4.1.1.32 - carboxykinase (GTP), ec:1.2.1.3 - dehydrogenase (NAD+), ec:1.1.1.79 - reductase (NADP+), ec:4.1.1.49 - carboxykinase (ATP), ec:1.1.1.40 - dehydrogenase (oxaloacetate-decarboxylating) (NADP+), ec:1.1.1.37 - dehydrogenase, ec:1.1.1.39 - dehydrogenase (decarboxylating), ec:1.2.4.1 - dehydrogenase (acetyl-transferring), ec:3.1.2.6 - hydrolase, ec:1.1.1.38 - dehydrogenase (oxaloacetate-d…	1, 2, 1, 3, 2, 6, 2, 2, 2, 2, 3, 1, 2	TR58695|c0_g1_i3, TR59926|c1_g1_i4, TR59926|c1_g1_i3, TR66083|c1_g1_i2, TR73014|c3_g2_i5, TR58695|c0_g1_i3, TR73014|c3_g2_i4, scaffold1315, TR69958|c0_g1_i1, TR57784|c0_g1_i1, Mj_1_GCCAAT_L005_R1_001_(paired)_trimmed_(paired)_contig_4352, TR55944|c0_g1_i2, Mj_1_GCCAAT_L005_R1_001_(paired)_trimmed_(paired)_contig_4144, TR55944|c1_g1_i1, TR55944|c1_g1_i3, scaffold1315, TR69958|c0_g1_i1, TR68003|c0_…	13	67	19.403
Nitrogen metabolism	map00910	ec:1.7.7.1 - reductase, ec:3.5.5.1 - acetonitrilase, ec:4.2.1.1 - anhydrase, ec:1.7.1.1 - reductase (NADH), ec:1.7.2.1 - reductase (NO-forming), ec:1.7.7.2 - reductase, ec:1.7.1.2 - reductase [NAD(P)H]	2, 2, 4, 2, 2, 1, 1	Mj_1_GCCAAT_L005_R1_001_(paired)_trimmed_(paired)_contig_13352, TR78356|c0_g1_i1, TR51377|c0_g1_i1, TR70720|c2_g1_i5, TR66223|c0_g1_i3, Mj_1_GCCAAT_L005_R1_001_(paired)_trimmed_(paired)_contig_4196, TR66223|c0_g1_i1, TR48934|c0_g1_i1, scaffold11027, TR60806|c1_g1_i1, Mj_1_GCCAAT_L005_R1_001_(paired)_trimmed_(paired)_contig_13352, TR78356|c0_g1_i1, Mj_1_GCCAAT_L005_R1_001_(paired)_trimmed_(paired)…	7	37	18.9189
Chloroalkane and chloroalkene degradation	map00625	ec:1.2.1.3 - dehydrogenase (NAD+), ec:3.8.1.5 - dehalogenase, ec:1.1.1.1 - dehydrogenase	2, 1, 4	TR59926|c1_g1_i4, TR59926|c1_g1_i3, Mj_1_GCCAAT_L005_R1_001_(paired)_trimmed_(paired)_contig_1053, scaffold13198, TR56627|c0_g1_i1, TR59702|c0_g1_i1, TR70956|c0_g2_i6	3	16	18.75
Inositol phosphate metabolism	map00562	ec:2.7.1.67 - 4-kinase, ec:2.7.8.11 - 3-phosphatidyltransferase, ec:3.1.3.67 - 3-phosphatase, ec:3.1.4.3 - C, ec:5.3.1.1 - isomerase, ec:3.1.3.25 - phosphatase, ec:3.1.4.11 - phospholipase C, ec:3.1.3.36 - 5-phosphatase, ec:2.7.1.150 - 5-kinase	2, 1, 2, 2, 1, 1, 4, 1, 4	TR78523|c0_g2_i2, TR65134|c0_g1_i2, TR65382|c0_g3_i11, TR52392|c0_g1_i2, Mj_1_GCCAAT_L005_R1_001_(paired)_trimmed_(paired)_contig_16706, TR47929|c0_g1_i1, TR56954|c0_g1_i1, TR47653|c0_g1_i1, Mj_1_GCCAAT_L005_R1_001_(paired)_trimmed_(paired)_contig_8059, TR71447|c2_g2_i2, TR71447|c2_g2_i4, TR47929|c0_g1_i1, TR71447|c2_g2_i5, TR76474|c0_g1_i3, TR77712|c2_g1_i3, TR75490|c1_g2_i17, TR75490|c1_g2_i18,…	9	48	18.75
Amino sugar and nucleotide sugar metabolism	map00520	ec:1.1.1.271 - synthase, ec:2.7.7.64 - uridylyltransferase, ec:2.4.1.43 - 4-alpha-galacturonosyltransferase, ec:3.2.1.37 - 1,4-beta-xylosidase, ec:1.3.1.98 - dehydrogenase, ec:4.2.1.47 - 4,6-dehydratase, ec:2.7.1.2 - glucokinase (phosphorylating), ec:5.4.2.8 - mannose phosphomutase, ec:2.7.7.22 - guanylyltransferase (GDP), ec:5.1.3.6 - 4-epimerase, ec:1.6.2.2 - reductase, ec:3.2.1.14 - ChiC, ec:2…	2, 1, 16, 1, 4, 1, 4, 2, 2, 6, 3, 5, 2, 6, 1, 1, 1, 3, 7, 3, 6, 1	TR65600|c0_g1_i2, Mj_1_GCCAAT_L005_R1_001_(paired)_trimmed_(paired)_contig_10961, TR68667|c0_g1_i1, TR59334|c0_g1_i6, Mj_1_GCCAAT_L005_R1_001_(paired)_trimmed_(paired)_contig_11491, TR59334|c0_g1_i5, TR74724|c0_g2_i1, TR78019|c0_g1_i1, TR59334|c0_g1_i3, TR64491|c0_g1_i1, Mj_1_GCCAAT_L005_R1_001_(paired)_trimmed_(paired)_contig_7509, TR61408|c0_g1_i1, TR58769|c0_g1_i2, TR58769|c0_g1_i4, TR64520|c0…	22	119	18.4874
Pyrimidine metabolism	map00240	ec:2.7.1.48 - kinase, ec:3.6.1.9 - diphosphatase, ec:3.6.1.17 - (asymmetrical), ec:3.5.4.12 - deaminase, ec:3.1.3.5 - uridine 5'-nucleotidase, ec:2.7.4.9 - kinase, ec:2.7.1.21 - kinase, ec:2.7.4.14 - kinase, ec:3.2.2.8 - nucleosidase, ec:3.2.2.3 - nucleosidase, ec:2.7.4.22 - kinase, ec:3.6.1.6 - diphosphate phosphatase	10, 8, 3, 1, 9, 2, 3, 10, 3, 3, 5, 2	Mj_1_GCCAAT_L005_R1_001_(paired)_trimmed_(paired)_contig_474, TR67910|c0_g1_i3, TR69157|c2_g1_i2, scaffold11045, TR67738|c1_g1_i2, TR67738|c1_g1_i5, TR69157|c2_g1_i4, TR71410|c0_g1_i1, TR69157|c2_g1_i1, TR71410|c0_g1_i3, TR53933|c0_g1_i3, TR53933|c0_g1_i6, Mj_1_GCCAAT_L005_R1_001_(paired)_trimmed_(paired)_contig_859, TR57029|c1_g2_i2, TR57029|c1_g2_i1, TR55767|c0_g1_i2, Mj_1_GCCAAT_L005_R1_001_(p…	12	65	18.4615
Purine metabolism	map00230	ec:3.6.1.15 - phosphatase, ec:3.2.2.7 - nucleosidase, ec:3.2.2.2 - nucleosidase, ec:3.6.1.9 - diphosphatase, ec:3.6.1.17 - (asymmetrical), ec:2.7.7.4 - adenylyltransferase, ec:2.7.4.10 - kinase, ec:3.1.3.5 - uridine 5'-nucleotidase, ec:3.5.3.9 - deiminase, ec:3.2.2.1 - nucleosidase, ec:3.1.7.2 - 3'-diphosphatase, ec:3.2.2.8 - nucleosidase, ec:4.3.2.3 - lyase, ec:2.7.6.1 - diphosphokinase, ec:2.4.…	62, 3, 3, 8, 3, 1, 1, 9, 1, 3, 3, 3, 1, 1, 6, 1, 1, 2, 2, 1	Mj_1_GCCAAT_L005_R1_001_(paired)_trimmed_(paired)_contig_12660, Mj_1_GCCAAT_L005_R1_001_(paired)_trimmed_(paired)_contig_33280, TR66907|c0_g3_i2, TR55061|c0_g1_i1, Mj_1_GCCAAT_L005_R1_001_(paired)_trimmed_(paired)_contig_1505, Mj_1_GCCAAT_L005_R1_001_(paired)_trimmed_(paired)_contig_6958, TR48752|c0_g1_i2, TR48752|c0_g1_i1, TR66010|c1_g5_i4, TR68737|c0_g1_i1, TR46390|c0_g1_i1, Mj_1_GCCAAT_L005_R1…	20	109	18.3486
Arginine biosynthesis	map00220	ec:3.5.1.14 - acid amidohydrolase, ec:3.5.1.16 - deacetylase, ec:1.2.1.38 - reductase, ec:6.3.4.5 - synthase, ec:2.6.1.1 - transaminase	1, 1, 1, 3, 1	TR66984|c0_g1_i1, TR58579|c0_g2_i1, TR79517|c1_g4_i7, TR65469|c1_g1_i5, Mj_1_GCCAAT_L005_R1_001_(paired)_trimmed_(paired)_contig_10417, TR65469|c1_g1_i3, TR71621|c0_g2_i4	5	28	17.8571
Glycerophospholipid metabolism	map00564	ec:2.7.8.5 - 1-phosphatidyltransferase, ec:2.3.1.23 - O-acyltransferase, ec:2.7.8.11 - 3-phosphatidyltransferase, ec:1.1.1.8 - dehydrogenase (NAD+), ec:2.7.1.107 - kinase (ATP), ec:3.1.4.3 - C, ec:2.7.1.32 - kinase, ec:1.1.1.94 - dehydrogenase [NAD(P)+], ec:2.7.1.82 - kinase, ec:2.7.8.2 - cholinephosphotransferase, ec:3.1.1.4 - A2	1, 2, 1, 1, 1, 2, 3, 1, 8, 1, 1	TR70327|c1_g1_i2, TR73183|c0_g1_i1, TR73183|c0_g1_i5, TR65382|c0_g3_i11, TR62942|c1_g1_i1, TR72887|c0_g2_i1, TR47929|c0_g1_i1, TR56954|c0_g1_i1, TR73290|c1_g2_i2, TR67133|c1_g7_i2, TR71147|c1_g1_i1, TR62942|c1_g1_i1, TR72624|c0_g2_i1, TR67133|c1_g7_i2, TR71147|c1_g1_i1, TR64770|c3_g1_i3, TR72624|c0_g2_i4, TR64770|c3_g1_i4, TR73290|c1_g2_i2, TR64770|c3_g1_i6, TR77465|c0_g1_i1, TR57176|c0_g1_i1	11	62	17.7419
Nicotinate and nicotinamide metabolism	map00760	ec:2.7.7.1 - adenylyltransferase, ec:3.6.1.9 - diphosphatase, ec:1.4.3.16 - oxidase, ec:1.2.3.1 - oxidase, ec:3.6.1.22 - diphosphatase, ec:3.1.3.5 - uridine 5'-nucleotidase, ec:3.2.2.1 - nucleosidase, ec:3.2.2.3 - nucleosidase, ec:6.3.5.1 - synthase (glutamine-hydrolysing), ec:2.7.7.18 - adenylyltransferase	1, 8, 4, 2, 4, 9, 3, 3, 2, 1	TR62237|c1_g1_i1, TR53933|c0_g1_i3, TR53933|c0_g1_i6, Mj_1_GCCAAT_L005_R1_001_(paired)_trimmed_(paired)_contig_859, TR57029|c1_g2_i2, TR57029|c1_g2_i1, TR55767|c0_g1_i2, Mj_1_GCCAAT_L005_R1_001_(paired)_trimmed_(paired)_contig_741, TR65609|c0_g2_i5, TR69704|c0_g1_i8, TR69704|c1_g1_i5, TR69704|c1_g1_i4, TR69704|c0_g1_i6, TR63984|c0_g1_i4, Mj_1_GCCAAT_L005_R1_001_(paired)_trimmed_(paired)_contig_40…	10	59	16.9492
Caffeine metabolism	map00232	ec:2.3.1.5 - N-acetyltransferase, ec:1.14.14.1 - monooxygenase	3, 1	Mj_1_GCCAAT_L005_R1_001_(paired)_trimmed_(paired)_contig_1855, TR66922|c3_g1_i3, TR57624|c0_g1_i2, Mj_1_GCCAAT_L005_R1_001_(paired)_trimmed_(paired)_contig_21912	2	12	16.6667
Biosynthesis of siderophore group nonribosomal peptides	map01053	ec:5.4.4.2 - synthase	1	TR75813|c4_g1_i2	1	6	16.6667
Glycosaminoglycan biosynthesis - keratan sulfate	map00533	ec:2.4.99.4 - alpha-2,3-sialyltransferase	1	TR74801|c0_g1_i1	1	6	16.6667
Valine, leucine and isoleucine degradation	map00280	ec:1.2.1.3 - dehydrogenase (NAD+), ec:1.2.3.1 - oxidase, ec:1.2.4.4 - dehydrogenase (2-methylpropanoyl-transferring), ec:3.1.2.4 - hydrolase, ec:6.4.1.4 - carboxylase, ec:4.2.1.17 - hydratase	2, 2, 1, 1, 2, 1	TR59926|c1_g1_i4, TR59926|c1_g1_i3, TR63984|c0_g1_i4, Mj_1_GCCAAT_L005_R1_001_(paired)_trimmed_(paired)_contig_402, TR68003|c0_g1_i6, TR58596|c0_g1_i2, TR78051|c0_g1_i3, TR78119|c1_g1_i6, TR58596|c0_g1_i2	6	36	16.6667
Pentose phosphate pathway	map00030	ec:5.1.3.1 - 3-epimerase, ec:2.7.1.90 - 1-phosphotransferase, ec:2.7.1.11 - phosphohexokinase, ec:1.1.1.44 - dehydrogenase (NADP+-dependent, decarboxylating), ec:2.7.1.15 - deoxyribokinase, ec:3.1.1.31 - phosphogluconolactonase, ec:2.7.6.1 - diphosphokinase, ec:4.1.2.13 - aldolase, ec:1.1.1.49 - dehydrogenase (NADP+)	1, 5, 7, 1, 4, 1, 1, 1, 2	TR56927|c0_g1_i1, Mj_1_GCCAAT_L005_R1_001_(paired)_trimmed_(paired)_contig_4805, TR65276|c0_g1_i2, TR67850|c0_g2_i1, TR64724|c0_g1_i2, TR65276|c0_g1_i1, TR65276|c0_g1_i2, TR67850|c0_g2_i1, TR64724|c0_g1_i2, TR65276|c0_g1_i1, scaffold12110, TR68610|c2_g1_i1, Mj_1_GCCAAT_L005_R1_001_(paired)_trimmed_(paired)_contig_4805, TR56168|c0_g2_i3, TR58559|c0_g1_i3, TR57588|c0_g1_i2, C967576, TR65331|c0_g2_i…	9	55	16.3636
beta-Alanine metabolism	map00410	ec:1.2.1.3 - dehydrogenase (NAD+), ec:1.5.3.17 - polyamine oxidase, ec:1.2.1.5 - dehydrogenase [NAD(P)+], ec:1.5.3.16 - oxidase, ec:3.1.2.4 - hydrolase, ec:4.2.1.17 - hydratase	2, 1, 2, 1, 1, 1	TR59926|c1_g1_i4, TR59926|c1_g1_i3, TR58687|c0_g1_i1, TR59926|c1_g1_i4, TR59926|c1_g1_i3, TR58687|c0_g1_i1, TR58596|c0_g1_i2, TR58596|c0_g1_i2	6	37	16.2162
Fructose and mannose metabolism	map00051	ec:2.7.1.90 - 1-phosphotransferase, ec:1.1.1.271 - synthase, ec:4.2.1.47 - 4,6-dehydratase, ec:5.4.2.8 - mannose phosphomutase, ec:2.7.7.22 - guanylyltransferase (GDP), ec:3.2.1.78 - endo-1,4-beta-mannosidase, ec:5.3.1.1 - isomerase, ec:2.7.7.13 - guanylyltransferase, ec:2.7.1.11 - phosphohexokinase, ec:2.7.1.4 - fructokinase (phosphorylating), ec:2.7.1.1 - hexokinase type IV glucokinase, ec:4.1.…	5, 2, 1, 2, 2, 10, 1, 2, 7, 6, 3, 1	Mj_1_GCCAAT_L005_R1_001_(paired)_trimmed_(paired)_contig_4805, TR65276|c0_g1_i2, TR67850|c0_g2_i1, TR64724|c0_g1_i2, TR65276|c0_g1_i1, TR65600|c0_g1_i2, Mj_1_GCCAAT_L005_R1_001_(paired)_trimmed_(paired)_contig_10961, TR55143|c0_g1_i1, Mj_1_GCCAAT_L005_R1_001_(paired)_trimmed_(paired)_contig_20459, TR66325|c0_g1_i1, Mj_1_GCCAAT_L005_R1_001_(paired)_trimmed_(paired)_contig_3923, TR57147|c0_g1_i1, T…	12	75	16
Histidine metabolism	map00340	ec:1.2.1.3 - dehydrogenase (NAD+), ec:1.2.1.5 - dehydrogenase [NAD(P)+], ec:3.6.1.31 - diphosphatase, ec:3.5.4.19 - cyclohydrolase, ec:4.1.1.22 - decarboxylase, ec:2.6.1.9 - transaminase	2, 2, 2, 2, 3, 1	TR59926|c1_g1_i4, TR59926|c1_g1_i3, TR59926|c1_g1_i4, TR59926|c1_g1_i3, TR76897|c0_g3_i3, TR76897|c0_g3_i1, TR76897|c0_g3_i3, TR76897|c0_g3_i1, Mj_1_GCCAAT_L005_R1_001_(paired)_trimmed_(paired)_contig_110, scaffold12079, scaffold12080, TR71621|c0_g2_i4	6	38	15.7895
Linoleic acid metabolism	map00591	ec:1.14.14.1 - monooxygenase, ec:3.1.1.4 - A2	1, 1	Mj_1_GCCAAT_L005_R1_001_(paired)_trimmed_(paired)_contig_21912, TR57176|c0_g1_i1	2	13	15.3846
Steroid degradation	map00984	ec:1.1.1.145 - dehydrogenase, ec:1.3.99.5 - 4-dehydrogenase (acceptor)	4, 2	TR66090|c0_g1_i2, TR66090|c0_g1_i1, TR66090|c0_g1_i3, TR66998|c0_g1_i6, TR64176|c0_g1_i2, TR64176|c0_g1_i1	2	13	15.3846
Glyoxylate and dicarboxylate metabolism	map00630	ec:1.1.1.79 - reductase (NADP+), ec:1.2.3.4 - oxidase, ec:1.17.1.9 - dehydrogenase, ec:6.2.1.8 - ligase, ec:1.1.1.37 - dehydrogenase, ec:2.1.2.1 - hydroxymethyltransferase, ec:1.1.1.81 - reductase, ec:2.6.1.45 - transaminase, ec:1.1.1.36 - reductase, ec:4.2.1.3 - hydratase, ec:1.1.3.15 - oxidase	1, 2, 1, 1, 6, 1, 1, 1, 1, 1, 4	TR66083|c1_g1_i2, TR65600|c0_g1_i2, Mj_1_GCCAAT_L005_R1_001_(paired)_trimmed_(paired)_contig_10961, TR66561|c0_g1_i1, TR74767|c0_g1_i7, TR57784|c0_g1_i1, Mj_1_GCCAAT_L005_R1_001_(paired)_trimmed_(paired)_contig_4352, TR55944|c0_g1_i2, Mj_1_GCCAAT_L005_R1_001_(paired)_trimmed_(paired)_contig_4144, TR55944|c1_g1_i1, TR55944|c1_g1_i3, TR49523|c0_g1_i1, TR66083|c1_g1_i2, Mj_1_GCCAAT_L005_R1_001_(pair…	11	73	15.0685
Biotin metabolism	map00780	ec:2.3.1.41 - synthase I, ec:1.1.1.100 - reductase, ec:2.8.1.6 - synthase	2, 9, 1	TR66829|c0_g1_i1, Mj_1_GCCAAT_L005_R1_001_(paired)_trimmed_(paired)_contig_6456, TR72994|c0_g2_i3, TR72994|c0_g2_i4, scaffold12026, TR71875|c1_g1_i1, TR72994|c0_g2_i1, Mj_1_GCCAAT_L005_R1_001_(paired)_trimmed_(paired)_contig_10874, TR76397|c0_g1_i10, Mj_1_GCCAAT_L005_R1_001_(paired)_trimmed_(paired)_contig_51435, TR76397|c0_g1_i5, TR62449|c0_g1_i1	3	20	15
Cysteine and methionine metabolism	map00270	ec:3.3.1.1 - S-adenosylhomocysteine synthase, ec:2.6.1.57 - transaminase, ec:1.1.1.37 - dehydrogenase, ec:4.2.1.109 - 1-phosphate dehydratase, ec:2.6.1.5 - transaminase, ec:2.1.1.5 - S-methyltransferase, ec:2.6.1.1 - transaminase, ec:1.13.11.54 - dioxygenase [iron(II)-requiring], ec:4.4.1.15 - desulfhydrase, ec:3.1.3.77 - synthase, ec:3.5.99.7 - deaminase	1, 1, 6, 1, 1, 2, 1, 1, 1, 1, 1	TR55179|c0_g2_i2, TR71621|c0_g2_i4, TR57784|c0_g1_i1, Mj_1_GCCAAT_L005_R1_001_(paired)_trimmed_(paired)_contig_4352, TR55944|c0_g1_i2, Mj_1_GCCAAT_L005_R1_001_(paired)_trimmed_(paired)_contig_4144, TR55944|c1_g1_i1, TR55944|c1_g1_i3, TR79242|c2_g12_i3, TR71621|c0_g2_i4, TR62823|c0_g1_i1, TR65038|c0_g1_i1, TR71621|c0_g2_i4, TR75404|c0_g1_i5, TR65196|c0_g1_i1, TR79242|c2_g12_i3, TR65196|c0_g1_i1	11	76	14.4737
Mucin type O-glycan biosynthesis	map00512	ec:2.4.99.4 - alpha-2,3-sialyltransferase	1	TR74801|c0_g1_i1	1	7	14.2857
Riboflavin metabolism	map00740	ec:3.6.1.9 - diphosphatase, ec:3.1.3.2 - phosphatase, ec:4.1.99.12 - synthase, ec:3.5.4.25 - cyclohydrolase II	8, 13, 1, 1	TR53933|c0_g1_i3, TR53933|c0_g1_i6, Mj_1_GCCAAT_L005_R1_001_(paired)_trimmed_(paired)_contig_859, TR57029|c1_g2_i2, TR57029|c1_g2_i1, TR55767|c0_g1_i2, Mj_1_GCCAAT_L005_R1_001_(paired)_trimmed_(paired)_contig_741, TR65609|c0_g2_i5, TR71103|c1_g1_i3, TR71103|c1_g1_i1, TR70447|c2_g4_i1, TR70447|c2_g4_i2, TR70447|c2_g4_i3, TR70447|c2_g4_i5, TR70447|c2_g4_i6, TR61277|c0_g1_i1, TR70447|c2_g4_i7, TR727…	4	28	14.2857
Carbon fixation pathways in prokaryotes	map00720	ec:1.1.1.37 - dehydrogenase, ec:6.2.1.5 - ligase (ADP-forming), ec:1.3.5.1 - dehydrogenase, ec:2.3.3.8 - citrate synthase, ec:1.5.1.20 - reductase [NAD(P)H], ec:4.2.1.17 - hydratase, ec:4.2.1.3 - hydratase	6, 3, 1, 2, 2, 1, 1	TR57784|c0_g1_i1, Mj_1_GCCAAT_L005_R1_001_(paired)_trimmed_(paired)_contig_4352, TR55944|c0_g1_i2, Mj_1_GCCAAT_L005_R1_001_(paired)_trimmed_(paired)_contig_4144, TR55944|c1_g1_i1, TR55944|c1_g1_i3, Mj_1_GCCAAT_L005_R1_001_(paired)_trimmed_(paired)_contig_2470, TR67801|c0_g1_i1, TR72803|c1_g1_i10, Mj_1_GCCAAT_L005_R1_001_(paired)_trimmed_(paired)_contig_2556, Mj_1_GCCAAT_L005_R1_001_(paired)_trimm…	7	50	14
Steroid hormone biosynthesis	map00140	ec:1.1.1.145 - dehydrogenase, ec:1.1.1.62 - 17-dehydrogenase, ec:2.4.1.17 - 1-naphthol glucuronyltransferase, ec:1.14.14.1 - monooxygenase, ec:1.1.1.53 - 20beta)-hydroxysteroid dehydrogenase	4, 3, 3, 1, 5	TR66090|c0_g1_i2, TR66090|c0_g1_i1, TR66090|c0_g1_i3, TR66998|c0_g1_i6, TR59116|c0_g1_i2, TR59683|c0_g1_i1, Mj_1_GCCAAT_L005_R1_001_(paired)_trimmed_(paired)_contig_5440, Mj_1_GCCAAT_L005_R1_001_(paired)_trimmed_(paired)_contig_10159, TR70566|c1_g1_i1, TR76014|c1_g1_i2, Mj_1_GCCAAT_L005_R1_001_(paired)_trimmed_(paired)_contig_21912, TR58169|c0_g1_i1, Mj_1_GCCAAT_L005_R1_001_(paired)_trimmed_(pair…	5	36	13.8889
Pentose and glucuronate interconversions	map00040	ec:3.2.1.15 - pectin depolymerase (ambiguous), ec:5.1.3.1 - 3-epimerase, ec:4.2.2.2 - lyase, ec:2.7.7.64 - uridylyltransferase, ec:3.2.1.67 - 1,4-alpha-galacturonidase, ec:1.1.1.2 - dehydrogenase (NADP+), ec:2.4.1.17 - 1-naphthol glucuronyltransferase, ec:1.1.1.22 - 6-dehydrogenase, ec:3.1.1.11 - pectin demethoxylase	10, 1, 9, 1, 9, 3, 3, 3, 15	TR58859|c0_g1_i1, TR76494|c0_g4_i2, TR58859|c0_g1_i3, TR76494|c0_g4_i4, TR76494|c0_g4_i6, Mj_1_GCCAAT_L005_R1_001_(paired)_trimmed_(paired)_contig_22031, Mj_1_GCCAAT_L005_R1_001_(paired)_trimmed_(paired)_contig_25626, TR58854|c0_g2_i6, TR79038|c2_g1_i1, TR58854|c0_g2_i4, TR56927|c0_g1_i1, Mj_1_GCCAAT_L005_R1_001_(paired)_trimmed_(paired)_contig_12156, scaffold1222, TR48142|c0_g2_i1, Mj_1_GCCAAT_L…	9	67	13.4328
Glycosaminoglycan degradation	map00531	ec:3.2.1.23 - lactase (ambiguous), ec:3.2.1.52 - hexosaminidase	13, 6	TR65049|c0_g1_i2, Mj_1_GCCAAT_L005_R1_001_(paired)_trimmed_(paired)_contig_88, TR69917|c2_g1_i5, TR69917|c2_g1_i2, Mj_1_GCCAAT_L005_R1_001_(paired)_trimmed_(paired)_contig_3748, TR54199|c0_g1_i1, TR54199|c0_g1_i2, TR76648|c3_g1_i3, TR76648|c3_g1_i2, TR76063|c0_g1_i1, TR76063|c0_g1_i3, scaffold1457, TR65049|c0_g1_i1, TR64776|c2_g1_i1, TR64776|c2_g1_i4, TR77354|c5_g1_i1, scaffold12088, TR64776|c2_g…	2	15	13.3333
Ether lipid metabolism	map00565	ec:3.1.4.3 - C, ec:2.7.8.2 - cholinephosphotransferase, ec:3.1.1.4 - A2	2, 1, 1	TR47929|c0_g1_i1, TR56954|c0_g1_i1, TR77465|c0_g1_i1, TR57176|c0_g1_i1	3	23	13.0435
Pantothenate and CoA biosynthesis	map00770	ec:1.2.1.3 - dehydrogenase (NAD+), ec:1.5.3.17 - polyamine oxidase, ec:3.6.1.9 - diphosphatase, ec:2.7.1.33 - kinase	2, 1, 8, 1	TR59926|c1_g1_i4, TR59926|c1_g1_i3, TR58687|c0_g1_i1, TR53933|c0_g1_i3, TR53933|c0_g1_i6, Mj_1_GCCAAT_L005_R1_001_(paired)_trimmed_(paired)_contig_859, TR57029|c1_g2_i2, TR57029|c1_g2_i1, TR55767|c0_g1_i2, Mj_1_GCCAAT_L005_R1_001_(paired)_trimmed_(paired)_contig_741, TR65609|c0_g2_i5, TR61622|c0_g1_i2	4	31	12.9032
Isoquinoline alkaloid biosynthesis	map00950	ec:2.6.1.57 - transaminase, ec:2.1.1.128 - 6-O-methyltransferase, ec:2.6.1.5 - transaminase, ec:1.1.1.247 - reductase (NADPH), ec:2.6.1.1 - transaminase, ec:2.1.1.116 - 4'-O-methyltransferase, ec:1.21.3.3 - oxidase	1, 1, 1, 5, 1, 1, 1	TR71621|c0_g2_i4, Mj_1_GCCAAT_L005_R1_001_(paired)_trimmed_(paired)_contig_40130, TR71621|c0_g2_i4, TR62849|c0_g1_i1, TR62849|c0_g1_i3, Mj_1_GCCAAT_L005_R1_001_(paired)_trimmed_(paired)_contig_37580, TR42933|c0_g1_i1, TR79795|c0_g1_i5, TR71621|c0_g2_i4, Mj_1_GCCAAT_L005_R1_001_(paired)_trimmed_(paired)_contig_40130, TR56425|c0_g1_i1	7	55	12.7273
Anthocyanin biosynthesis	map00942	ec:2.3.1.153 - 5-(6'''-hydroxycinnamoyltransferase), ec:2.4.1.115 - 3-O-glucosyltransferase	1, 13	TR72300|c3_g1_i1, TR78141|c0_g3_i4, TR79653|c2_g2_i6, TR79653|c2_g2_i8, TR71260|c0_g1_i3, Mj_1_GCCAAT_L005_R1_001_(paired)_trimmed_(paired)_contig_14885, TR59607|c0_g1_i2, TR60804|c1_g1_i1, TR73362|c0_g1_i3, TR78386|c0_g2_i2, scaffold11393, TR78047|c0_g1_i8, TR79162|c1_g3_i8, TR75596|c2_g7_i1	2	16	12.5
Benzoxazinoid biosynthesis	map00402	ec:4.1.2.8 - lyase	1	Mj_1_GCCAAT_L005_R1_001_(paired)_trimmed_(paired)_contig_9323	1	8	12.5
Cutin, suberine and wax biosynthesis	map00073	ec:2.3.1.20 - O-acyltransferase	2	Mj_1_GCCAAT_L005_R1_001_(paired)_trimmed_(paired)_contig_42721, scaffold14077	1	8	12.5
Limonene and pinene degradation	map00903	ec:1.2.1.3 - dehydrogenase (NAD+), ec:4.2.1.17 - hydratase	2, 1	TR59926|c1_g1_i4, TR59926|c1_g1_i3, TR58596|c0_g1_i2	2	16	12.5
Thiamine metabolism	map00730	ec:3.6.1.15 - phosphatase, ec:3.1.3.2 - phosphatase, ec:2.8.1.4 - uracil 4-sulfurtransferase	62, 13, 1	Mj_1_GCCAAT_L005_R1_001_(paired)_trimmed_(paired)_contig_12660, Mj_1_GCCAAT_L005_R1_001_(paired)_trimmed_(paired)_contig_33280, TR66907|c0_g3_i2, TR55061|c0_g1_i1, Mj_1_GCCAAT_L005_R1_001_(paired)_trimmed_(paired)_contig_1505, Mj_1_GCCAAT_L005_R1_001_(paired)_trimmed_(paired)_contig_6958, TR48752|c0_g1_i2, TR48752|c0_g1_i1, TR66010|c1_g5_i4, TR68737|c0_g1_i1, TR46390|c0_g1_i1, Mj_1_GCCAAT_L005_R1…	3	24	12.5
Tryptophan metabolism	map00380	ec:1.2.1.3 - dehydrogenase (NAD+), ec:3.5.5.1 - acetonitrilase, ec:1.2.3.1 - oxidase, ec:1.14.14.1 - monooxygenase, ec:4.2.1.84 - hydratase, ec:3.2.1.147 - myrosinase, ec:4.2.1.17 - hydratase	2, 2, 2, 1, 2, 2, 1	TR59926|c1_g1_i4, TR59926|c1_g1_i3, TR51377|c0_g1_i1, TR70720|c2_g1_i5, TR63984|c0_g1_i4, Mj_1_GCCAAT_L005_R1_001_(paired)_trimmed_(paired)_contig_402, Mj_1_GCCAAT_L005_R1_001_(paired)_trimmed_(paired)_contig_21912, TR51377|c0_g1_i1, TR71437|c0_g1_i8, TR52392|c0_g1_i2, Mj_1_GCCAAT_L005_R1_001_(paired)_trimmed_(paired)_contig_16706, TR58596|c0_g1_i2	7	58	12.069
Vitamin B6 metabolism	map00750	ec:1.1.1.65 - 4-dehydrogenase, ec:1.2.3.1 - oxidase, ec:4.3.3.6 - 5'-phosphate synthase (glutamine hydrolysing)	2, 2, 1	TR66912|c3_g2_i4, C934504, TR63984|c0_g1_i4, Mj_1_GCCAAT_L005_R1_001_(paired)_trimmed_(paired)_contig_402, Mj_1_GCCAAT_L005_R1_001_(paired)_trimmed_(paired)_contig_9242	3	25	12
Glycine, serine and threonine metabolism	map00260	ec:4.1.2.5 - aldolase, ec:2.1.2.1 - hydroxymethyltransferase, ec:1.1.1.81 - reductase, ec:2.1.1.5 - S-methyltransferase, ec:2.6.1.45 - transaminase, ec:1.1.1.1 - dehydrogenase, ec:4.2.1.20 - synthase, ec:3.1.3.3 - phosphatase	1, 1, 1, 2, 1, 4, 1, 6	TR66148|c0_g1_i3, TR49523|c0_g1_i1, TR66083|c1_g1_i2, TR62823|c0_g1_i1, TR65038|c0_g1_i1, Mj_1_GCCAAT_L005_R1_001_(paired)_trimmed_(paired)_contig_3048, scaffold13198, TR56627|c0_g1_i1, TR59702|c0_g1_i1, TR70956|c0_g2_i6, Mj_1_GCCAAT_L005_R1_001_(paired)_trimmed_(paired)_contig_9323, TR63028|c0_g1_i4, TR64920|c0_g1_i1, TR61603|c0_g1_i2, TR64920|c0_g1_i3, TR61603|c0_g1_i1, TR64920|c0_g1_i5	8	68	11.7647
Tyrosine metabolism	map00350	ec:2.6.1.57 - transaminase, ec:1.2.1.5 - dehydrogenase [NAD(P)+], ec:1.2.3.1 - oxidase, ec:2.6.1.5 - transaminase, ec:2.6.1.1 - transaminase, ec:2.6.1.9 - transaminase, ec:1.1.1.1 - dehydrogenase	1, 2, 2, 1, 1, 1, 4	TR71621|c0_g2_i4, TR59926|c1_g1_i4, TR59926|c1_g1_i3, TR63984|c0_g1_i4, Mj_1_GCCAAT_L005_R1_001_(paired)_trimmed_(paired)_contig_402, TR71621|c0_g2_i4, TR71621|c0_g2_i4, TR71621|c0_g2_i4, scaffold13198, TR56627|c0_g1_i1, TR59702|c0_g1_i1, TR70956|c0_g2_i6	7	61	11.4754
Fluorobenzoate degradation	map00364	ec:4.2.1.84 - hydratase, ec:5.5.1.1 - cycloisomerase	2, 3	TR51377|c0_g1_i1, TR71437|c0_g1_i8, Mj_1_GCCAAT_L005_R1_001_(paired)_trimmed_(paired)_contig_15648, Mj_1_GCCAAT_L005_R1_001_(paired)_trimmed_(paired)_contig_4458, scaffold1320	2	18	11.1111
Isoflavonoid biosynthesis	map00943	ec:2.1.1.150 - 7-O-methyltransferase, ec:4.2.1.105 - dehydratase	1, 4	Mj_1_GCCAAT_L005_R1_001_(paired)_trimmed_(paired)_contig_3266, TR61876|c1_g1_i2, Mj_1_GCCAAT_L005_R1_001_(paired)_trimmed_(paired)_contig_4685, scaffold10285, TR63179|c0_g1_i1	2	18	11.1111
Lipopolysaccharide biosynthesis	map00540	ec:5.3.1.13 - isomerase, ec:2.7.7.38 - cytidylyltransferase, ec:2.5.1.55 - synthase	4, 1, 1	TR66425|c1_g4_i6, Mj_1_GCCAAT_L005_R1_001_(paired)_trimmed_(paired)_contig_5397, TR66425|c1_g4_i3, TR66425|c1_g4_i4, TR63487|c0_g1_i1, Mj_1_GCCAAT_L005_R1_001_(paired)_trimmed_(paired)_contig_6797	3	27	11.1111
Naphthalene degradation	map00626	ec:1.1.1.1 - dehydrogenase	4	scaffold13198, TR56627|c0_g1_i1, TR59702|c0_g1_i1, TR70956|c0_g2_i6	1	9	11.1111
Other types of O-glycan biosynthesis	map00514	ec:2.4.1.109 - mannosyltransferase	1	TR68331|c0_g1_i1	1	9	11.1111
Polyketide sugar unit biosynthesis	map00523	ec:5.1.3.13 - 3,5-epimerase, ec:1.1.1.133 - reductase, ec:4.2.1.46 - 4,6-dehydratase	2, 2, 1	Mj_1_GCCAAT_L005_R1_001_(paired)_trimmed_(paired)_contig_11728, TR59000|c0_g1_i1, Mj_1_GCCAAT_L005_R1_001_(paired)_trimmed_(paired)_contig_11728, TR59000|c0_g1_i1, TR64290|c0_g1_i1	3	27	11.1111
Selenocompound metabolism	map00450	ec:2.7.7.4 - adenylyltransferase, ec:4.4.1.16 - lyase	1, 13	TR51141|c0_g2_i3, TR77549|c3_g4_i11, TR77549|c3_g4_i22, TR77549|c3_g4_i12, TR77549|c3_g4_i1, TR77549|c3_g4_i14, TR77549|c3_g4_i3, TR77549|c3_g4_i15, TR77549|c3_g4_i4, TR77549|c3_g4_i6, TR77549|c3_g4_i8, TR77549|c3_g4_i9, Mj_1_GCCAAT_L005_R1_001_(paired)_trimmed_(paired)_contig_6450, TR77866|c0_g4_i9	2	18	11.1111
Styrene degradation	map00643	ec:3.5.5.1 - acetonitrilase, ec:4.2.1.84 - hydratase	2, 2	TR51377|c0_g1_i1, TR70720|c2_g1_i5, TR51377|c0_g1_i1, TR71437|c0_g1_i8	2	18	11.1111
Methane metabolism	map00680	ec:1.17.1.9 - dehydrogenase, ec:4.2.1.11 - hydratase, ec:1.1.1.37 - dehydrogenase, ec:2.1.2.1 - hydroxymethyltransferase, ec:1.1.1.284 - dehydrogenase, ec:2.7.1.11 - phosphohexokinase, ec:2.6.1.45 - transaminase, ec:3.1.3.3 - phosphatase, ec:4.1.2.13 - aldolase	1, 1, 6, 1, 3, 7, 1, 6, 1	TR66561|c0_g1_i1, TR77437|c0_g1_i6, TR57784|c0_g1_i1, Mj_1_GCCAAT_L005_R1_001_(paired)_trimmed_(paired)_contig_4352, TR55944|c0_g1_i2, Mj_1_GCCAAT_L005_R1_001_(paired)_trimmed_(paired)_contig_4144, TR55944|c1_g1_i1, TR55944|c1_g1_i3, TR49523|c0_g1_i1, TR59702|c0_g1_i1, scaffold13198, TR56627|c0_g1_i1, TR65276|c0_g1_i2, TR67850|c0_g2_i1, TR64724|c0_g1_i2, TR65276|c0_g1_i1, scaffold12110, TR68610|c…	9	82	10.9756
Phenylalanine metabolism	map00360	ec:2.6.1.57 - transaminase, ec:1.2.1.5 - dehydrogenase [NAD(P)+], ec:2.6.1.5 - transaminase, ec:3.5.1.32 - hydrolase, ec:2.6.1.1 - transaminase, ec:2.6.1.9 - transaminase, ec:4.2.1.17 - hydratase	1, 2, 1, 1, 1, 1, 1	TR71621|c0_g2_i4, TR59926|c1_g1_i4, TR59926|c1_g1_i3, TR71621|c0_g2_i4, TR69301|c0_g1_i3, TR71621|c0_g2_i4, TR71621|c0_g2_i4, TR58596|c0_g1_i2	7	66	10.6061
Glutathione metabolism	map00480	ec:1.11.1.11 - peroxidase, ec:1.1.1.44 - dehydrogenase (NADP+-dependent, decarboxylating), ec:2.5.1.18 - transferase, ec:1.1.1.49 - dehydrogenase (NADP+)	2, 1, 5, 2	TR60163|c0_g1_i6, Mj_1_GCCAAT_L005_R1_001_(paired)_trimmed_(paired)_contig_574, TR56168|c0_g2_i3, Mj_1_GCCAAT_L005_R1_001_(paired)_trimmed_(paired)_contig_32966, TR55115|c0_g1_i2, TR78780|c1_g3_i1, TR55115|c0_g1_i3, TR75298|c0_g1_i2, Mj_1_GCCAAT_L005_R1_001_(paired)_trimmed_(paired)_contig_411, TR69722|c0_g1_i2	4	38	10.5263
Indole alkaloid biosynthesis	map00901	ec:4.3.3.2 - synthase, ec:3.1.1.78 - esterase	1, 2	TR50010|c0_g1_i1, TR70689|c0_g1_i4, scaffold10336	2	19	10.5263
Sulfur metabolism	map00920	ec:1.8.4.9 - reductase (glutathione), ec:2.7.7.4 - adenylyltransferase, ec:1.8.4.8 - reductase (thioredoxin), ec:2.8.1.1 - sulfurtransferase, ec:1.8.99.2 - reductase	1, 1, 1, 1, 1	Mj_1_GCCAAT_L005_R1_001_(paired)_trimmed_(paired)_contig_531, TR51141|c0_g2_i3, Mj_1_GCCAAT_L005_R1_001_(paired)_trimmed_(paired)_contig_531, TR61838|c0_g1_i2, Mj_1_GCCAAT_L005_R1_001_(paired)_trimmed_(paired)_contig_531	5	48	10.4167
Geraniol degradation	map00281	ec:4.2.1.17 - hydratase	1	TR58596|c0_g1_i2	1	10	10
Ubiquinone and other terpenoid-quinone biosynthesis	map00130	ec:2.6.1.5 - transaminase, ec:6.2.1.26 - ligase, ec:5.4.4.2 - synthase, ec:6.2.1.12 - ligase	1, 1, 1, 6	TR71621|c0_g2_i4, TR74767|c0_g1_i7, TR75813|c4_g1_i2, TR59295|c0_g1_i1, Mj_1_GCCAAT_L005_R1_001_(paired)_trimmed_(paired)_contig_7358, Mj_1_GCCAAT_L005_R1_001_(paired)_trimmed_(paired)_contig_7360, TR74767|c0_g1_i7, Mj_1_GCCAAT_L005_R1_001_(paired)_trimmed_(paired)_contig_6882, TR74384|c1_g1_i4	4	40	10
Aminobenzoate degradation	map00627	ec:3.5.5.1 - acetonitrilase, ec:1.14.14.1 - monooxygenase, ec:4.2.1.84 - hydratase, ec:4.2.1.17 - hydratase, ec:3.6.1.7 - acetylphosphatase	2, 1, 2, 1, 1	TR51377|c0_g1_i1, TR70720|c2_g1_i5, Mj_1_GCCAAT_L005_R1_001_(paired)_trimmed_(paired)_contig_21912, TR51377|c0_g1_i1, TR71437|c0_g1_i8, TR58596|c0_g1_i2, TR70976|c0_g1_i3	5	51	9.80392
Aminoacyl-tRNA biosynthesis	map00970	ec:6.1.1.9 - ligase, ec:6.1.1.20 - ligase, ec:6.1.1.16 - ligase	1, 2, 1	TR76349|c0_g1_i3, Mj_1_GCCAAT_L005_R1_001_(paired)_trimmed_(paired)_contig_463, TR73420|c2_g1_i7, TR71991|c2_g1_i3	3	31	9.67742
Caprolactam degradation	map00930	ec:1.1.1.2 - dehydrogenase (NADP+), ec:4.2.1.17 - hydratase	3, 1	TR72994|c0_g2_i3, TR65081|c0_g1_i3, TR72994|c0_g2_i4, TR58596|c0_g1_i2	2	21	9.52381
Chlorocyclohexane and chlorobenzene degradation	map00361	ec:3.8.1.5 - dehalogenase, ec:5.5.1.1 - cycloisomerase	1, 3	Mj_1_GCCAAT_L005_R1_001_(paired)_trimmed_(paired)_contig_1053, Mj_1_GCCAAT_L005_R1_001_(paired)_trimmed_(paired)_contig_15648, Mj_1_GCCAAT_L005_R1_001_(paired)_trimmed_(paired)_contig_4458, scaffold1320	2	21	9.52381
Porphyrin and chlorophyll metabolism	map00860	ec:4.99.1.1 - ferrochelatase, ec:3.1.1.14 - CLH, ec:1.3.1.76 - dehydrogenase, ec:2.4.1.17 - 1-naphthol glucuronyltransferase, ec:1.14.13.122 - oxygenase, ec:1.14.15.17 - a oxygenase, ec:1.3.1.33 - reductase, ec:2.1.1.107 - C-methyltransferase, ec:1.16.3.1 - ceruloplasmin	2, 1, 4, 3, 3, 1, 5, 4, 2	TR68890|c2_g1_i8, TR68890|c2_g1_i3, TR75404|c0_g1_i5, TR71729|c0_g1_i2, TR71729|c0_g1_i1, C959464, TR71128|c1_g1_i3, Mj_1_GCCAAT_L005_R1_001_(paired)_trimmed_(paired)_contig_10159, TR70566|c1_g1_i1, TR76014|c1_g1_i2, Mj_1_GCCAAT_L005_R1_001_(paired)_trimmed_(paired)_contig_439, TR62253|c0_g1_i4, TR65196|c0_g1_i1, TR65196|c0_g1_i1, C915879, TR65196|c0_g1_i1, TR55131|c0_g1_i2, TR53101|c0_g1_i2, TR5…	9	105	8.57143
One carbon pool by folate	map00670	ec:2.1.2.1 - hydroxymethyltransferase, ec:1.5.1.20 - reductase [NAD(P)H]	1, 2	TR49523|c0_g1_i1, TR74342|c0_g4_i1, TR74215|c0_g2_i1	2	24	8.33333
Folate biosynthesis	map00790	ec:3.4.19.9 - gamma-glutamyl hydrolase, ec:4.1.2.25 - aldolase, ec:3.5.4.25 - cyclohydrolase II, ec:2.8.1.9 - cofactor sulfurtransferase	7, 1, 1, 2	TR66638|c0_g1_i1, TR66287|c0_g2_i1, TR66287|c1_g1_i1, TR67803|c0_g1_i2, TR67849|c0_g1_i5, TR66638|c1_g1_i1, TR67849|c0_g1_i4, TR58713|c1_g1_i1, TR77895|c0_g1_i1, Mj_1_GCCAAT_L005_R1_001_(paired)_trimmed_(paired)_contig_6450, TR61838|c0_g1_i2	4	51	7.84314
Arachidonic acid metabolism	map00590	ec:1.14.14.1 - monooxygenase, ec:3.1.1.4 - A2	1, 1	Mj_1_GCCAAT_L005_R1_001_(paired)_trimmed_(paired)_contig_21912, TR57176|c0_g1_i1	2	26	7.69231
Butanoate metabolism	map00650	ec:1.3.5.1 - dehydrogenase, ec:1.1.1.36 - reductase, ec:4.2.1.17 - hydratase, ec:1.3.1.44 - reductase (NAD+)	1, 1, 1, 2	Mj_1_GCCAAT_L005_R1_001_(paired)_trimmed_(paired)_contig_2556, Mj_1_GCCAAT_L005_R1_001_(paired)_trimmed_(paired)_contig_5440, TR58596|c0_g1_i2, TR64176|c0_g1_i2, TR64176|c0_g1_i1	4	55	7.27273
Propanoate metabolism	map00640	ec:1.2.4.4 - dehydrogenase (2-methylpropanoyl-transferring), ec:6.2.1.5 - ligase (ADP-forming), ec:3.1.2.4 - hydrolase, ec:4.2.1.17 - hydratase	1, 3, 1, 1	TR68003|c0_g1_i6, Mj_1_GCCAAT_L005_R1_001_(paired)_trimmed_(paired)_contig_2470, TR67801|c0_g1_i1, TR72803|c1_g1_i10, TR58596|c0_g1_i2, TR58596|c0_g1_i2	4	55	7.27273
Acarbose and validamycin biosynthesis	map00525	ec:4.2.1.46 - 4,6-dehydratase	1	TR64290|c0_g1_i1	1	14	7.14286
Lysine biosynthesis	map00300	ec:2.6.1.57 - transaminase, ec:4.3.3.7 - synthase	1, 1	TR71621|c0_g2_i4, TR74711|c0_g2_i2	2	28	7.14286
Neomycin, kanamycin and gentamicin biosynthesis	map00524	ec:2.7.1.2 - glucokinase (phosphorylating), ec:2.7.1.1 - hexokinase type IV glucokinase	4, 3	Mj_1_GCCAAT_L005_R1_001_(paired)_trimmed_(paired)_contig_14748, TR71694|c1_g6_i7, TR73457|c1_g1_i5, TR73457|c2_g2_i7, Mj_1_GCCAAT_L005_R1_001_(paired)_trimmed_(paired)_contig_14748, Mj_1_GCCAAT_L005_R1_001_(paired)_trimmed_(paired)_contig_11891, TR65331|c0_g2_i1	2	28	7.14286
Arginine and proline metabolism	map00330	ec:1.2.1.3 - dehydrogenase (NAD+), ec:1.5.3.17 - polyamine oxidase, ec:1.14.11.2 - 4-dioxygenase, ec:3.4.11.5 - aminopeptidase, ec:1.5.3.16 - oxidase, ec:2.6.1.1 - transaminase	2, 1, 4, 3, 1, 1	TR59926|c1_g1_i4, TR59926|c1_g1_i3, TR58687|c0_g1_i1, TR63802|c2_g1_i5, TR56849|c0_g1_i1, TR67270|c3_g1_i1, TR70053|c1_g4_i1, TR65336|c0_g1_i2, Mj_1_GCCAAT_L005_R1_001_(paired)_trimmed_(paired)_contig_39, TR65336|c0_g1_i4, TR58687|c0_g1_i1, TR71621|c0_g2_i4	6	86	6.97674
Biosynthesis of unsaturated fatty acids	map01040	ec:1.14.19.2 - 9-desaturase	1	Mj_1_GCCAAT_L005_R1_001_(paired)_trimmed_(paired)_contig_5652	1	16	6.25
Flavone and flavonol biosynthesis	map00944	ec:1.14.14.82 - 3'-monooxygenase, ec:1.14.14.81 - 3',5'-hydroxylase	1, 1	Mj_1_GCCAAT_L005_R1_001_(paired)_trimmed_(paired)_contig_16402, Mj_1_GCCAAT_L005_R1_001_(paired)_trimmed_(paired)_contig_64768	2	32	6.25
Alanine, aspartate and glutamate metabolism	map00250	ec:1.4.3.16 - oxidase, ec:6.3.4.5 - synthase, ec:2.6.1.1 - transaminase	4, 3, 1	TR69704|c0_g1_i8, TR69704|c1_g1_i5, TR69704|c1_g1_i4, TR69704|c0_g1_i6, TR65469|c1_g1_i5, Mj_1_GCCAAT_L005_R1_001_(paired)_trimmed_(paired)_contig_10417, TR65469|c1_g1_i3, TR71621|c0_g2_i4	3	50	6
Terpenoid backbone biosynthesis	map00900	ec:1.8.3.5 - oxidase, ec:1.17.7.1 - synthase (ferredoxin), ec:2.5.1.29 - diphosphate synthase	2, 1, 1	TR60925|c4_g1_i2, TR60925|c4_g1_i4, Mj_1_GCCAAT_L005_R1_001_(paired)_trimmed_(paired)_contig_4199, TR57988|c0_g1_i2	3	50	6
Carotenoid biosynthesis	map00906	ec:1.2.3.14 - oxidase, ec:1.13.11.51 - dioxygenase	1, 1	TR63984|c0_g1_i4, TR67581|c0_g1_i1	2	37	5.40541
Peptidoglycan biosynthesis	map00550	ec:1.3.1.98 - dehydrogenase	4	TR54299|c0_g2_i1, TR56425|c0_g1_i1, Mj_1_GCCAAT_L005_R1_001_(paired)_trimmed_(paired)_contig_1738, TR55406|c0_g1_i2	1	19	5.26316
Taurine and hypotaurine metabolism	map00430	ec:1.13.11.19 - dioxygenase	1	TR66652|c1_g2_i3	1	19	5.26316
C5-Branched dibasic acid metabolism	map00660	ec:6.2.1.5 - ligase (ADP-forming)	3	Mj_1_GCCAAT_L005_R1_001_(paired)_trimmed_(paired)_contig_2470, TR67801|c0_g1_i1, TR72803|c1_g1_i10	1	22	4.54545
Diterpenoid biosynthesis	map00904	ec:2.3.1.167 - III 10-O-acetyltransferase, ec:2.3.1.162 - O-acetyltransferase	1, 1	TR75190|c0_g2_i5, TR75190|c0_g2_i5	2	50	4
Toluene degradation	map00623	ec:5.5.1.1 - cycloisomerase	3	Mj_1_GCCAAT_L005_R1_001_(paired)_trimmed_(paired)_contig_15648, Mj_1_GCCAAT_L005_R1_001_(paired)_trimmed_(paired)_contig_4458, scaffold1320	1	25	4
Lysine degradation	map00310	ec:1.2.1.3 - dehydrogenase (NAD+), ec:4.2.1.17 - hydratase	2, 1	TR59926|c1_g1_i4, TR59926|c1_g1_i3, TR58596|c0_g1_i2	2	53	3.77358
Phosphonate and phosphinate metabolism	map00440	ec:2.7.8.2 - cholinephosphotransferase	1	TR77465|c0_g1_i1	1	29	3.44828
Benzoate degradation	map00362	ec:5.5.1.1 - cycloisomerase, ec:4.2.1.17 - hydratase	3, 1	Mj_1_GCCAAT_L005_R1_001_(paired)_trimmed_(paired)_contig_15648, Mj_1_GCCAAT_L005_R1_001_(paired)_trimmed_(paired)_contig_4458, scaffold1320, TR58596|c0_g1_i2	2	69	2.89855
Sesquiterpenoid and triterpenoid biosynthesis	map00909	ec:1.14.14.17 - monooxygenase	1	Mj_1_GCCAAT_L005_R1_001_(paired)_trimmed_(paired)_contig_5528	1	80	1.25

## Sheet: TransM9_KEGG
Table S13 KEGG pathway mapping of transcript modules sharing high correlation coefficient (PCC > 0.7) with the identified metabolite modules in Mallotus japonicus.
Pathway	Pathway ID	Enzyme	#Seqs of Enzyme	Seqs	#Enzs in Pathway	#KEGG Enzymes	Ratio of enzymes in our sample in kegg enzymes (%)
Lipoic acid metabolism	map00785	ec:2.3.1.181 - transferase	1	Mj_1_GCCAAT_L005_R1_001_(paired)_trimmed_(paired)_contig_30889	1	3	33.3333
Drug metabolism - cytochrome P450	map00982	ec:1.2.1.5 - dehydrogenase [NAD(P)+], ec:1.14.14.1 - monooxygenase	1, 1	Mj_1_GCCAAT_L005_R1_001_(paired)_trimmed_(paired)_contig_8222, Mj_1_GCCAAT_L005_R1_001_(paired)_trimmed_(paired)_contig_8540	2	8	25
Metabolism of xenobiotics by cytochrome P450	map00980	ec:1.2.1.5 - dehydrogenase [NAD(P)+], ec:1.14.14.1 - monooxygenase	1, 1	Mj_1_GCCAAT_L005_R1_001_(paired)_trimmed_(paired)_contig_8222, Mj_1_GCCAAT_L005_R1_001_(paired)_trimmed_(paired)_contig_8540	2	10	20
Caffeine metabolism	map00232	ec:2.3.1.5 - N-acetyltransferase, ec:1.14.14.1 - monooxygenase	3, 1	Mj_1_GCCAAT_L005_R1_001_(paired)_trimmed_(paired)_contig_4844, TR58331|c3_g1_i1, TR66668|c0_g1_i1, Mj_1_GCCAAT_L005_R1_001_(paired)_trimmed_(paired)_contig_8540	2	12	16.6667
Drug metabolism - other enzymes	map00983	ec:2.7.1.21 - kinase, ec:2.3.1.5 - N-acetyltransferase, ec:3.1.1.1 - ali-esterase	1, 3, 4	TR67906|c0_g2_i3, Mj_1_GCCAAT_L005_R1_001_(paired)_trimmed_(paired)_contig_4844, TR58331|c3_g1_i1, TR66668|c0_g1_i1, TR79228|c1_g4_i6, Mj_1_GCCAAT_L005_R1_001_(paired)_trimmed_(paired)_contig_6715, TR57552|c0_g2_i2, TR66432|c0_g1_i3	3	18	16.6667
Galactose metabolism	map00052	ec:3.2.1.23 - lactase (ambiguous), ec:3.2.1.22 - melibiase, ec:5.1.3.3 - 1-epimerase, ec:2.7.7.64 - uridylyltransferase, ec:3.2.1.20 - maltase, ec:2.7.7.9 - uridylyltransferase	2, 1, 6, 1, 1, 1	TR62687|c0_g1_i1, scaffold1419, TR76282|c1_g1_i2, TR71445|c1_g6_i6, TR72268|c0_g1_i3, TR71445|c1_g6_i4, TR71445|c1_g6_i14, TR72268|c0_g1_i1, TR71445|c1_g6_i10, Mj_1_GCCAAT_L005_R1_001_(paired)_trimmed_(paired)_contig_573, TR79274|c2_g1_i1, Mj_1_GCCAAT_L005_R1_001_(paired)_trimmed_(paired)_contig_573	6	48	12.5
Glycosphingolipid biosynthesis - ganglio series	map00604	ec:3.2.1.23 - lactase (ambiguous)	2	TR62687|c0_g1_i1, scaffold1419	1	8	12.5
Citrate cycle (TCA cycle)	map00020	ec:2.3.1.12 - acetyltransferase, ec:2.3.1.61 - succinyltransferase, ec:1.8.1.4 - dehydrogenase	1, 1, 1	TR73190|c0_g1_i6, TR73190|c0_g1_i6, TR66830|c0_g1_i1	3	25	12
Other glycan degradation	map00511	ec:3.2.1.23 - lactase (ambiguous)	2	TR62687|c0_g1_i1, scaffold1419	1	9	11.1111
Steroid hormone biosynthesis	map00140	ec:1.3.1.3 - 5beta-reductase, ec:1.1.1.145 - dehydrogenase, ec:1.3.99.6 - 4-dehydrogenase, ec:1.14.14.1 - monooxygenase	2, 2, 1, 1	TR73135|c0_g1_i2, Mj_1_GCCAAT_L005_R1_001_(paired)_trimmed_(paired)_contig_11950, TR73135|c0_g1_i2, Mj_1_GCCAAT_L005_R1_001_(paired)_trimmed_(paired)_contig_11950, TR73135|c0_g1_i2, Mj_1_GCCAAT_L005_R1_001_(paired)_trimmed_(paired)_contig_8540	4	36	11.1111
Glycolysis / Gluconeogenesis	map00010	ec:1.2.1.3 - dehydrogenase (NAD+), ec:2.3.1.12 - acetyltransferase, ec:5.1.3.3 - 1-epimerase, ec:1.8.1.4 - dehydrogenase, ec:1.2.1.5 - dehydrogenase [NAD(P)+]	2, 1, 6, 1, 1	Mj_1_GCCAAT_L005_R1_001_(paired)_trimmed_(paired)_contig_8222, TR72401|c3_g1_i3, TR73190|c0_g1_i6, TR71445|c1_g6_i6, TR72268|c0_g1_i3, TR71445|c1_g6_i4, TR71445|c1_g6_i14, TR72268|c0_g1_i1, TR71445|c1_g6_i10, TR66830|c0_g1_i1, Mj_1_GCCAAT_L005_R1_001_(paired)_trimmed_(paired)_contig_8222	5	47	10.6383
Glutathione metabolism	map00480	ec:1.11.1.11 - peroxidase, ec:1.11.1.12 - glutathione peroxidase, ec:2.5.1.16 - synthase, ec:1.11.1.9 - peroxidase	2, 1, 1, 2	TR60330|c0_g1_i6, TR60330|c0_g1_i4, TR57699|c1_g1_i2, TR53419|c0_g1_i2, TR57699|c1_g1_i2, TR57699|c1_g1_i3	4	38	10.5263
Glycerolipid metabolism	map00561	ec:1.2.1.3 - dehydrogenase (NAD+), ec:3.2.1.22 - melibiase, ec:2.7.1.107 - kinase (ATP), ec:2.7.7.9 - uridylyltransferase	2, 1, 1, 1	Mj_1_GCCAAT_L005_R1_001_(paired)_trimmed_(paired)_contig_8222, TR72401|c3_g1_i3, TR76282|c1_g1_i2, TR72887|c0_g2_i2, Mj_1_GCCAAT_L005_R1_001_(paired)_trimmed_(paired)_contig_573	4	39	10.2564
Flavonoid biosynthesis	map00941	ec:1.14.14.81 - 3',5'-hydroxylase, ec:1.14.20.6 - synthase	1, 1	Mj_1_GCCAAT_L005_R1_001_(paired)_trimmed_(paired)_contig_10618, Mj_1_GCCAAT_L005_R1_001_(paired)_trimmed_(paired)_contig_1580	2	22	9.09091
Oxidative phosphorylation	map00190	ec:3.6.1.1 - diphosphatase	5	Mj_1_GCCAAT_L005_R1_001_(paired)_trimmed_(paired)_contig_11967, Mj_1_GCCAAT_L005_R1_001_(paired)_trimmed_(paired)_contig_78913, TR48979|c0_g1_i1, TR75376|c0_g1_i1, TR75376|c0_g1_i3	1	11	9.09091
Tryptophan metabolism	map00380	ec:1.2.1.3 - dehydrogenase (NAD+), ec:1.2.3.7 - oxidase, ec:2.3.1.61 - succinyltransferase, ec:1.8.1.4 - dehydrogenase, ec:1.14.14.1 - monooxygenase	2, 1, 1, 1, 1	Mj_1_GCCAAT_L005_R1_001_(paired)_trimmed_(paired)_contig_8222, TR72401|c3_g1_i3, TR77440|c0_g3_i1, TR73190|c0_g1_i6, TR66830|c0_g1_i1, Mj_1_GCCAAT_L005_R1_001_(paired)_trimmed_(paired)_contig_8540	5	58	8.62069
alpha-Linolenic acid metabolism	map00592	ec:2.1.1.141 - O-methyltransferase	1	TR57834|c0_g1_i1	1	12	8.33333
Thiamine metabolism	map00730	ec:3.6.1.15 - phosphatase, ec:2.7.6.2 - diphosphokinase	7, 1	Mj_1_GCCAAT_L005_R1_001_(paired)_trimmed_(paired)_contig_10396, TR63801|c2_g1_i8, TR63801|c2_g1_i3, TR67545|c0_g1_i1, TR67545|c0_g1_i4, TR45807|c0_g1_i1, TR64002|c1_g1_i1, TR55904|c0_g1_i1	2	24	8.33333
beta-Alanine metabolism	map00410	ec:1.2.1.3 - dehydrogenase (NAD+), ec:4.1.1.15 - decarboxylase, ec:1.2.1.5 - dehydrogenase [NAD(P)+]	2, 1, 1	Mj_1_GCCAAT_L005_R1_001_(paired)_trimmed_(paired)_contig_8222, TR72401|c3_g1_i3, TR55432|c0_g1_i1, Mj_1_GCCAAT_L005_R1_001_(paired)_trimmed_(paired)_contig_8222	3	37	8.10811
Toluene degradation	map00623	ec:1.2.1.28 - dehydrogenase (NAD+), ec:3.1.1.45 - maleylacetate enol-lactonase	1, 1	TR77440|c0_g3_i1, TR57552|c0_g2_i2	2	25	8
Arachidonic acid metabolism	map00590	ec:1.11.1.9 - peroxidase, ec:1.14.14.1 - monooxygenase	2, 1	TR57699|c1_g1_i2, TR57699|c1_g1_i3, Mj_1_GCCAAT_L005_R1_001_(paired)_trimmed_(paired)_contig_8540	2	26	7.69231
Glycosphingolipid biosynthesis - globo and isoglobo series	map00603	ec:3.2.1.22 - melibiase	1	TR76282|c1_g1_i2	1	13	7.69231
Linoleic acid metabolism	map00591	ec:1.14.14.1 - monooxygenase	1	Mj_1_GCCAAT_L005_R1_001_(paired)_trimmed_(paired)_contig_8540	1	13	7.69231
Steroid degradation	map00984	ec:1.1.1.145 - dehydrogenase	2	TR73135|c0_g1_i2, Mj_1_GCCAAT_L005_R1_001_(paired)_trimmed_(paired)_contig_11950	1	13	7.69231
Sphingolipid metabolism	map00600	ec:3.2.1.23 - lactase (ambiguous), ec:3.2.1.22 - melibiase	2, 1	TR62687|c0_g1_i1, scaffold1419, TR76282|c1_g1_i2	2	27	7.40741
Fatty acid degradation	map00071	ec:1.2.1.3 - dehydrogenase (NAD+), ec:1.14.14.1 - monooxygenase	2, 1	Mj_1_GCCAAT_L005_R1_001_(paired)_trimmed_(paired)_contig_8222, TR72401|c3_g1_i3, Mj_1_GCCAAT_L005_R1_001_(paired)_trimmed_(paired)_contig_8540	2	29	6.89655
Phosphatidylinositol signaling system	map04070	ec:2.7.11.13 - kinase C, ec:2.7.1.107 - kinase (ATP)	1, 1	TR70096|c4_g1_i1, TR72887|c0_g2_i2	2	29	6.89655
Glycosaminoglycan degradation	map00531	ec:3.2.1.23 - lactase (ambiguous)	2	TR62687|c0_g1_i1, scaffold1419	1	15	6.66667
Phenylpropanoid biosynthesis	map00940	ec:1.2.1.68 - dehydrogenase, ec:1.11.1.7 - lactoperoxidase	4, 5	Mj_1_GCCAAT_L005_R1_001_(paired)_trimmed_(paired)_contig_8222, TR72401|c3_g1_i2, TR72401|c3_g1_i1, TR72401|c3_g1_i3, TR60330|c0_g1_i6, TR57699|c1_g1_i3, TR57699|c1_g1_i2, TR60330|c0_g1_i4, TR79423|c3_g10_i10	2	30	6.66667
Ascorbate and aldarate metabolism	map00053	ec:1.11.1.11 - peroxidase, ec:1.2.1.3 - dehydrogenase (NAD+), ec:2.7.7.64 - uridylyltransferase	2, 2, 1	TR60330|c0_g1_i6, TR60330|c0_g1_i4, Mj_1_GCCAAT_L005_R1_001_(paired)_trimmed_(paired)_contig_8222, TR72401|c3_g1_i3, Mj_1_GCCAAT_L005_R1_001_(paired)_trimmed_(paired)_contig_573	3	46	6.52174
Starch and sucrose metabolism	map00500	ec:3.2.1.2 - saccharogen amylase, ec:2.4.1.21 - synthase (glycosyl-transferring), ec:2.4.1.34 - synthase, ec:3.2.1.20 - maltase, ec:2.7.7.9 - uridylyltransferase	1, 1, 1, 1, 1	TR60081|c1_g1_i1, TR76257|c4_g1_i2, Mj_1_GCCAAT_L005_R1_001_(paired)_trimmed_(paired)_contig_40571, TR79274|c2_g1_i1, Mj_1_GCCAAT_L005_R1_001_(paired)_trimmed_(paired)_contig_573	5	77	6.49351
Chloroalkane and chloroalkene degradation	map00625	ec:1.2.1.3 - dehydrogenase (NAD+)	2	Mj_1_GCCAAT_L005_R1_001_(paired)_trimmed_(paired)_contig_8222, TR72401|c3_g1_i3	1	16	6.25
Limonene and pinene degradation	map00903	ec:1.2.1.3 - dehydrogenase (NAD+)	2	Mj_1_GCCAAT_L005_R1_001_(paired)_trimmed_(paired)_contig_8222, TR72401|c3_g1_i3	1	16	6.25
Lysine degradation	map00310	ec:1.2.1.3 - dehydrogenase (NAD+), ec:2.3.1.61 - succinyltransferase, ec:1.8.1.4 - dehydrogenase	2, 1, 1	Mj_1_GCCAAT_L005_R1_001_(paired)_trimmed_(paired)_contig_8222, TR72401|c3_g1_i3, TR73190|c0_g1_i6, TR66830|c0_g1_i1	3	53	5.66038
Fluorobenzoate degradation	map00364	ec:3.1.1.45 - maleylacetate enol-lactonase	1	TR57552|c0_g2_i2	1	18	5.55556
Valine, leucine and isoleucine degradation	map00280	ec:1.2.1.3 - dehydrogenase (NAD+), ec:1.8.1.4 - dehydrogenase	2, 1	Mj_1_GCCAAT_L005_R1_001_(paired)_trimmed_(paired)_contig_8222, TR72401|c3_g1_i3, TR66830|c0_g1_i1	2	36	5.55556
Histidine metabolism	map00340	ec:1.2.1.3 - dehydrogenase (NAD+), ec:1.2.1.5 - dehydrogenase [NAD(P)+]	2, 1	Mj_1_GCCAAT_L005_R1_001_(paired)_trimmed_(paired)_contig_8222, TR72401|c3_g1_i3, Mj_1_GCCAAT_L005_R1_001_(paired)_trimmed_(paired)_contig_8222	2	38	5.26316
Primary bile acid biosynthesis	map00120	ec:1.3.1.3 - 5beta-reductase	2	TR73135|c0_g1_i2, Mj_1_GCCAAT_L005_R1_001_(paired)_trimmed_(paired)_contig_11950	1	19	5.26316
Taurine and hypotaurine metabolism	map00430	ec:4.1.1.15 - decarboxylase	1	TR55432|c0_g1_i1	1	19	5.26316
Chlorocyclohexane and chlorobenzene degradation	map00361	ec:3.1.1.45 - maleylacetate enol-lactonase	1	TR57552|c0_g2_i2	1	21	4.7619
Pentose and glucuronate interconversions	map00040	ec:3.1.1.11 - pectin demethoxylase, ec:2.7.7.64 - uridylyltransferase, ec:2.7.7.9 - uridylyltransferase	1, 1, 1	TR70670|c0_g2_i1, Mj_1_GCCAAT_L005_R1_001_(paired)_trimmed_(paired)_contig_573, Mj_1_GCCAAT_L005_R1_001_(paired)_trimmed_(paired)_contig_573	3	67	4.47761
Pyruvate metabolism	map00620	ec:1.2.1.3 - dehydrogenase (NAD+), ec:2.3.1.12 - acetyltransferase, ec:1.8.1.4 - dehydrogenase	2, 1, 1	Mj_1_GCCAAT_L005_R1_001_(paired)_trimmed_(paired)_contig_8222, TR72401|c3_g1_i3, TR73190|c0_g1_i6, TR66830|c0_g1_i1	3	67	4.47761
Sulfur metabolism	map00920	ec:2.8.1.1 - sulfurtransferase, ec:2.3.1.30 - O-acetyltransferase	1, 1	TR69717|c3_g1_i2, TR61723|c0_g1_i1	2	48	4.16667
Carbon fixation in photosynthetic organisms	map00710	ec:4.1.1.39 - carboxylase	1	TR81193|c0_g1_i1	1	25	4
Vitamin B6 metabolism	map00750	ec:1.4.3.5 - 5'-phosphate synthase	3	TR64899|c0_g2_i3, TR64899|c0_g2_i7, TR58753|c0_g1_i3	1	25	4
Aminobenzoate degradation	map00627	ec:1.2.1.28 - dehydrogenase (NAD+), ec:1.14.14.1 - monooxygenase	1, 1	TR77440|c0_g3_i1, Mj_1_GCCAAT_L005_R1_001_(paired)_trimmed_(paired)_contig_8540	2	51	3.92157
Lysine biosynthesis	map00300	ec:5.1.1.7 - epimerase	1	TR75094|c4_g3_i2	1	28	3.57143
Riboflavin metabolism	map00740	ec:3.5.4.26 - deaminase	1	TR69994|c0_g1_i1	1	28	3.57143
Cyanoamino acid metabolism	map00460	ec:1.14.14.37 - oxime monooxygenase	1	TR68242|c1_g5_i1	1	29	3.44828
Glycerophospholipid metabolism	map00564	ec:1.1.5.3 - dehydrogenase, ec:2.7.1.107 - kinase (ATP)	1, 1	TR69171|c1_g1_i2, TR72887|c0_g2_i2	2	62	3.22581
Pantothenate and CoA biosynthesis	map00770	ec:1.2.1.3 - dehydrogenase (NAD+)	2	Mj_1_GCCAAT_L005_R1_001_(paired)_trimmed_(paired)_contig_8222, TR72401|c3_g1_i3	1	31	3.22581
Flavone and flavonol biosynthesis	map00944	ec:1.14.14.81 - 3',5'-hydroxylase	1	Mj_1_GCCAAT_L005_R1_001_(paired)_trimmed_(paired)_contig_10618	1	32	3.125
Pyrimidine metabolism	map00240	ec:2.7.1.21 - kinase, ec:1.3.5.2 - dehydrogenase (quinone)	1, 1	TR67906|c0_g2_i3, TR69994|c0_g1_i1	2	65	3.07692
N-Glycan biosynthesis	map00510	ec:3.2.1.106 - glucosidase	1	TR79274|c2_g1_i1	1	34	2.94118
Nitrogen metabolism	map00910	ec:4.2.1.1 - anhydrase	1	TR63596|c0_g1_i1	1	37	2.7027
Cysteine and methionine metabolism	map00270	ec:2.5.1.16 - synthase, ec:2.3.1.30 - O-acetyltransferase	1, 1	TR53419|c0_g1_i2, TR61723|c0_g1_i1	2	76	2.63158
Arginine and proline metabolism	map00330	ec:1.2.1.3 - dehydrogenase (NAD+), ec:2.5.1.16 - synthase	2, 1	Mj_1_GCCAAT_L005_R1_001_(paired)_trimmed_(paired)_contig_8222, TR72401|c3_g1_i3, TR53419|c0_g1_i2	2	86	2.32558
Alanine, aspartate and glutamate metabolism	map00250	ec:4.1.1.15 - decarboxylase	1	TR55432|c0_g1_i1	1	50	2
Folate biosynthesis	map00790	ec:2.8.1.9 - cofactor sulfurtransferase	1	TR63283|c0_g1_i2	1	51	1.96078
Purine metabolism	map00230	ec:3.6.1.15 - phosphatase, ec:6.3.3.1 - cyclo-ligase	7, 1	Mj_1_GCCAAT_L005_R1_001_(paired)_trimmed_(paired)_contig_10396, TR63801|c2_g1_i8, TR63801|c2_g1_i3, TR67545|c0_g1_i1, TR67545|c0_g1_i4, TR45807|c0_g1_i1, TR64002|c1_g1_i1, TR69643|c2_g1_i1	2	109	1.83486
Butanoate metabolism	map00650	ec:4.1.1.15 - decarboxylase	1	TR55432|c0_g1_i1	1	55	1.81818
Propanoate metabolism	map00640	ec:1.8.1.4 - dehydrogenase	1	TR66830|c0_g1_i1	1	55	1.81818
Nicotinate and nicotinamide metabolism	map00760	ec:2.7.1.23 - kinase	1	TR72887|c0_g2_i2	1	59	1.69492
Amino sugar and nucleotide sugar metabolism	map00520	ec:2.7.7.64 - uridylyltransferase, ec:2.7.7.9 - uridylyltransferase	1, 1	Mj_1_GCCAAT_L005_R1_001_(paired)_trimmed_(paired)_contig_573, Mj_1_GCCAAT_L005_R1_001_(paired)_trimmed_(paired)_contig_573	2	119	1.68067
Tyrosine metabolism	map00350	ec:1.2.1.5 - dehydrogenase [NAD(P)+]	1	Mj_1_GCCAAT_L005_R1_001_(paired)_trimmed_(paired)_contig_8222	1	61	1.63934
Phenylalanine metabolism	map00360	ec:1.2.1.5 - dehydrogenase [NAD(P)+]	1	Mj_1_GCCAAT_L005_R1_001_(paired)_trimmed_(paired)_contig_8222	1	66	1.51515
Glycine, serine and threonine metabolism	map00260	ec:1.8.1.4 - dehydrogenase	1	TR66830|c0_g1_i1	1	68	1.47059
Glyoxylate and dicarboxylate metabolism	map00630	ec:4.1.1.39 - carboxylase	1	TR81193|c0_g1_i1	1	73	1.36986

## Sheet: TransM10_KEGG
Table S13 KEGG pathway mapping of transcript modules sharing high correlation coefficient (PCC > 0.7) with the identified metabolite modules in Mallotus japonicus.
Pathway	Pathway ID	Enzyme	#Seqs of Enzyme	Seqs	#Enzs in Pathway	#KEGG Enzymes	Ratio of enzymes in our sample in kegg enzymes (%)
Drug metabolism - cytochrome P450	map00982	ec:1.2.1.5 - dehydrogenase [NAD(P)+], ec:1.1.1.1 - dehydrogenase, ec:2.5.1.18 - transferase, ec:1.14.14.1 - monooxygenase	2, 3, 2, 1	TR66779|c3_g5_i11, TR64340|c2_g1_i1, TR72553|c3_g1_i13, TR65825|c4_g2_i1, TR72553|c3_g1_i1, TR65701|c0_g1_i5, TR44735|c0_g1_i1, TR79999|c24_g2_i1	4	8	50
Metabolism of xenobiotics by cytochrome P450	map00980	ec:1.2.1.5 - dehydrogenase [NAD(P)+], ec:1.1.1.1 - dehydrogenase, ec:2.5.1.18 - transferase, ec:1.14.14.1 - monooxygenase	2, 3, 2, 1	TR66779|c3_g5_i11, TR64340|c2_g1_i1, TR72553|c3_g1_i13, TR65825|c4_g2_i1, TR72553|c3_g1_i1, TR65701|c0_g1_i5, TR44735|c0_g1_i1, TR79999|c24_g2_i1	4	10	40
Oxidative phosphorylation	map00190	ec:3.6.1.1 - diphosphatase, ec:1.3.5.1 - dehydrogenase, ec:7.1.2.2 - two-sector ATPase, ec:7.1.1.2 - reductase (H+-translocating)	3, 2, 1, 6	Mj_1_GCCAAT_L005_R1_001_(paired)_trimmed_(paired)_contig_4988, TR64429|c0_g2_i1, TR54037|c0_g1_i1, Mj_1_GCCAAT_L005_R1_001_(paired)_trimmed_(paired)_contig_642, TR62583|c0_g1_i1, TR64582|c4_g2_i1, TR68111|c0_g3_i3, TR55267|c0_g2_i1, TR65153|c0_g6_i3, TR68433|c1_g1_i2, TR65153|c0_g6_i2, TR68433|c1_g1_i3	4	11	36.3636
Photosynthesis	map00195	ec:7.1.2.2 - two-sector ATPase	1	TR64582|c4_g2_i1	1	3	33.3333
Carbon fixation in photosynthetic organisms	map00710	ec:2.6.1.2 - transaminase, ec:1.2.1.12 - dehydrogenase (phosphorylating), ec:1.1.1.40 - dehydrogenase (oxaloacetate-decarboxylating) (NADP+), ec:1.1.1.37 - dehydrogenase, ec:1.2.1.59 - dehydrogenase (NAD(P)+) (phosphorylating), ec:1.1.1.39 - dehydrogenase (decarboxylating)	1, 2, 1, 1, 2, 1	TR69854|c0_g1_i2, TR67952|c0_g2_i1, TR67952|c0_g2_i4, Mj_1_GCCAAT_L005_R1_001_(paired)_trimmed_(paired)_contig_19764, TR46219|c0_g1_i1, TR67952|c0_g2_i1, TR67952|c0_g2_i4, Mj_1_GCCAAT_L005_R1_001_(paired)_trimmed_(paired)_contig_19764	6	25	24
Drug metabolism - other enzymes	map00983	ec:3.1.1.1 - ali-esterase, ec:3.2.1.31 - beta-glucuronide glucuronohydrolase glucuronidase, ec:2.5.1.18 - transferase, ec:2.3.1.5 - N-acetyltransferase	8, 2, 2, 1	Mj_1_GCCAAT_L005_R1_001_(paired)_trimmed_(paired)_contig_15763, Mj_1_GCCAAT_L005_R1_001_(paired)_trimmed_(paired)_contig_7447, TR57462|c0_g1_i1, Mj_1_GCCAAT_L005_R1_001_(paired)_trimmed_(paired)_contig_64594, TR50409|c0_g1_i1, TR22679|c0_g1_i1, TR62331|c0_g1_i2, Mj_1_GCCAAT_L005_R1_001_(paired)_trimmed_(paired)_contig_19217, TR70497|c0_g1_i6, TR70497|c0_g1_i7, TR65701|c0_g1_i5, TR44735|c0_g1_i1, …	4	18	22.2222
Caffeine metabolism	map00232	ec:2.3.1.5 - N-acetyltransferase, ec:1.14.14.1 - monooxygenase	1, 1	TR65386|c1_g1_i1, TR79999|c24_g2_i1	2	12	16.6667
Selenocompound metabolism	map00450	ec:2.1.1.14 - S-methyltransferase, ec:2.5.1.48 - gamma-synthase, ec:2.1.1.13 - synthase	2, 1, 2	TR68341|c1_g1_i4, TR72209|c0_g1_i2, TR53263|c0_g1_i1, TR68341|c1_g1_i4, TR72209|c0_g1_i2	3	18	16.6667
Citrate cycle (TCA cycle)	map00020	ec:1.3.5.1 - dehydrogenase, ec:2.3.1.61 - succinyltransferase, ec:1.1.1.37 - dehydrogenase, ec:4.2.1.3 - hydratase	2, 1, 1, 3	Mj_1_GCCAAT_L005_R1_001_(paired)_trimmed_(paired)_contig_642, TR62583|c0_g1_i1, TR70921|c0_g2_i2, TR46219|c0_g1_i1, TR44806|c0_g1_i1, Mj_1_GCCAAT_L005_R1_001_(paired)_trimmed_(paired)_contig_538, TR77579|c0_g1_i3	4	25	16
Flavonoid biosynthesis	map00941	ec:1.14.14.81 - 3',5'-hydroxylase, ec:1.14.20.4 - synthase, ec:1.14.20.6 - synthase	1, 4, 1	TR61991|c0_g1_i1, TR57996|c0_g1_i2, TR66528|c0_g1_i1, TR66528|c0_g1_i3, TR66528|c0_g1_i5, Mj_1_GCCAAT_L005_R1_001_(paired)_trimmed_(paired)_contig_58566	3	22	13.6364
Glycosaminoglycan degradation	map00531	ec:3.2.1.31 - beta-glucuronide glucuronohydrolase glucuronidase, ec:3.2.1.23 - lactase (ambiguous)	2, 6	TR70497|c0_g1_i6, TR70497|c0_g1_i7, TR63671|c1_g1_i3, TR71697|c0_g1_i1, TR71697|c0_g1_i2, TR61997|c0_g1_i2, Mj_1_GCCAAT_L005_R1_001_(paired)_trimmed_(paired)_contig_13142, Mj_1_GCCAAT_L005_R1_001_(paired)_trimmed_(paired)_contig_563	2	15	13.3333
Various types of N-glycan biosynthesis	map00513	ec:2.4.1.101 - 2-beta-N-acetylglucosaminyltransferase, ec:2.4.1.143 - 2-beta-N-acetylglucosaminyltransferase, ec:3.2.1.113 - 1,2-alpha-mannosidase	1, 1, 1	Mj_1_GCCAAT_L005_R1_001_(paired)_trimmed_(paired)_contig_10720, Mj_1_GCCAAT_L005_R1_001_(paired)_trimmed_(paired)_contig_10720, TR79464|c1_g1_i10	3	23	13.0435
Glycolysis / Gluconeogenesis	map00010	ec:1.2.1.3 - dehydrogenase (NAD+), ec:1.2.1.12 - dehydrogenase (phosphorylating), ec:1.2.1.5 - dehydrogenase [NAD(P)+], ec:4.2.1.11 - hydratase, ec:1.1.1.1 - dehydrogenase, ec:1.2.1.59 - dehydrogenase (NAD(P)+) (phosphorylating)	2, 2, 2, 1, 3, 2	TR66779|c3_g5_i11, TR64340|c2_g1_i1, TR67952|c0_g2_i1, TR67952|c0_g2_i4, TR66779|c3_g5_i11, TR64340|c2_g1_i1, TR69127|c0_g1_i1, TR72553|c3_g1_i13, TR65825|c4_g2_i1, TR72553|c3_g1_i1, TR67952|c0_g2_i1, TR67952|c0_g2_i4	6	47	12.766
Chloroalkane and chloroalkene degradation	map00625	ec:1.2.1.3 - dehydrogenase (NAD+), ec:1.1.1.1 - dehydrogenase	2, 3	TR66779|c3_g5_i11, TR64340|c2_g1_i1, TR72553|c3_g1_i13, TR65825|c4_g2_i1, TR72553|c3_g1_i1	2	16	12.5
Glycosphingolipid biosynthesis - ganglio series	map00604	ec:3.2.1.23 - lactase (ambiguous)	6	TR63671|c1_g1_i3, TR71697|c0_g1_i1, TR71697|c0_g1_i2, TR61997|c0_g1_i2, Mj_1_GCCAAT_L005_R1_001_(paired)_trimmed_(paired)_contig_13142, Mj_1_GCCAAT_L005_R1_001_(paired)_trimmed_(paired)_contig_563	1	8	12.5
Thiamine metabolism	map00730	ec:3.6.1.15 - phosphatase, ec:2.7.4.3 - kinase, ec:3.1.3.2 - phosphatase	9, 1, 3	TR47237|c0_g1_i4, TR65493|c0_g1_i1, TR47237|c0_g1_i1, Mj_1_GCCAAT_L005_R1_001_(paired)_trimmed_(paired)_contig_86620, Mj_1_GCCAAT_L005_R1_001_(paired)_trimmed_(paired)_contig_7636, TR79906|c3_g1_i1, TR63044|c0_g1_i1, Mj_1_GCCAAT_L005_R1_001_(paired)_trimmed_(paired)_contig_1878, Mj_1_GCCAAT_L005_R1_001_(paired)_trimmed_(paired)_contig_488, TR79213|c1_g1_i2, TR70613|c0_g1_i4, TR72825|c0_g1_i6, TR7…	3	24	12.5
Fatty acid biosynthesis	map00061	ec:2.3.1.85 - synthase system, ec:1.1.1.100 - reductase	1, 1	Mj_1_GCCAAT_L005_R1_001_(paired)_trimmed_(paired)_contig_38880, Mj_1_GCCAAT_L005_R1_001_(paired)_trimmed_(paired)_contig_38880	2	17	11.7647
N-Glycan biosynthesis	map00510	ec:2.4.1.101 - 2-beta-N-acetylglucosaminyltransferase, ec:2.7.8.15 - N-acetylglucosaminephosphotransferase, ec:2.4.1.143 - 2-beta-N-acetylglucosaminyltransferase, ec:3.2.1.113 - 1,2-alpha-mannosidase	1, 2, 1, 1	Mj_1_GCCAAT_L005_R1_001_(paired)_trimmed_(paired)_contig_10720, TR59426|c0_g1_i2, Mj_1_GCCAAT_L005_R1_001_(paired)_trimmed_(paired)_contig_1905, Mj_1_GCCAAT_L005_R1_001_(paired)_trimmed_(paired)_contig_10720, TR79464|c1_g1_i10	4	34	11.7647
Naphthalene degradation	map00626	ec:1.1.1.1 - dehydrogenase	3	TR72553|c3_g1_i13, TR65825|c4_g2_i1, TR72553|c3_g1_i1	1	9	11.1111
Other glycan degradation	map00511	ec:3.2.1.23 - lactase (ambiguous)	6	TR63671|c1_g1_i3, TR71697|c0_g1_i1, TR71697|c0_g1_i2, TR61997|c0_g1_i2, Mj_1_GCCAAT_L005_R1_001_(paired)_trimmed_(paired)_contig_13142, Mj_1_GCCAAT_L005_R1_001_(paired)_trimmed_(paired)_contig_563	1	9	11.1111
Styrene degradation	map00643	ec:3.5.1.4 - acylamidase, ec:1.13.11.5 - 1,2-dioxygenase	1, 1	C923616, TR60298|c0_g1_i5	2	18	11.1111
Riboflavin metabolism	map00740	ec:3.5.4.25 - cyclohydrolase II, ec:3.1.3.2 - phosphatase, ec:4.1.99.12 - synthase	1, 3, 1	TR77895|c1_g1_i1, TR70613|c0_g1_i4, TR72825|c0_g1_i6, TR70613|c0_g1_i9, TR77895|c1_g1_i1	3	28	10.7143
Taurine and hypotaurine metabolism	map00430	ec:4.1.1.15 - decarboxylase, ec:1.13.11.19 - dioxygenase	1, 1	C967830, TR63535|c0_g2_i6	2	19	10.5263
Pyruvate metabolism	map00620	ec:1.2.1.3 - dehydrogenase (NAD+), ec:4.1.1.112 - decarboxylase, ec:1.1.1.40 - dehydrogenase (oxaloacetate-decarboxylating) (NADP+), ec:1.1.1.37 - dehydrogenase, ec:1.1.1.38 - dehydrogenase (oxaloacetate-decarboxylating), ec:4.4.1.5 - lyase, ec:1.1.1.39 - dehydrogenase (decarboxylating)	2, 1, 1, 1, 1, 2, 1	TR66779|c3_g5_i11, TR64340|c2_g1_i1, Mj_1_GCCAAT_L005_R1_001_(paired)_trimmed_(paired)_contig_19764, Mj_1_GCCAAT_L005_R1_001_(paired)_trimmed_(paired)_contig_19764, TR46219|c0_g1_i1, Mj_1_GCCAAT_L005_R1_001_(paired)_trimmed_(paired)_contig_19764, TR56682|c0_g1_i1, TR44735|c0_g1_i1, Mj_1_GCCAAT_L005_R1_001_(paired)_trimmed_(paired)_contig_19764	7	67	10.4478
Inositol phosphate metabolism	map00562	ec:2.7.1.159 - 5/6-kinase, ec:2.7.1.68 - 5-kinase, ec:2.7.1.134 - 1-kinase, ec:2.7.1.64 - 3-kinase, ec:3.1.4.3 - C	1, 1, 1, 2, 1	TR79251|c2_g1_i1, C973670, TR79251|c2_g1_i1, Mj_1_GCCAAT_L005_R1_001_(paired)_trimmed_(paired)_contig_34842, TR62210|c0_g1_i1, TR61314|c0_g1_i1	5	48	10.4167
Fatty acid degradation	map00071	ec:1.2.1.3 - dehydrogenase (NAD+), ec:1.1.1.1 - dehydrogenase, ec:1.14.14.1 - monooxygenase	2, 3, 1	TR66779|c3_g5_i11, TR64340|c2_g1_i1, TR72553|c3_g1_i13, TR65825|c4_g2_i1, TR72553|c3_g1_i1, TR79999|c24_g2_i1	3	29	10.3448
Phosphatidylinositol signaling system	map04070	ec:2.7.1.159 - 5/6-kinase, ec:2.7.1.68 - 5-kinase, ec:2.7.1.107 - kinase (ATP)	1, 1, 1	TR79251|c2_g1_i1, C973670, Mj_1_GCCAAT_L005_R1_001_(paired)_trimmed_(paired)_contig_24325	3	29	10.3448
Glycerolipid metabolism	map00561	ec:1.2.1.3 - dehydrogenase (NAD+), ec:3.1.3.21 - alpha-glycerophosphatase, ec:2.7.1.107 - kinase (ATP), ec:2.7.1.30 - kinase	2, 1, 1, 2	TR66779|c3_g5_i11, TR64340|c2_g1_i1, TR55139|c0_g1_i2, Mj_1_GCCAAT_L005_R1_001_(paired)_trimmed_(paired)_contig_24325, TR72521|c0_g1_i5, TR72521|c1_g1_i1	4	39	10.2564
Starch and sucrose metabolism	map00500	ec:3.2.1.4 - endo-1,4-beta-D-glucanase, ec:2.4.1.13 - synthase, ec:2.4.1.15 - synthase (UDP-forming), ec:3.2.1.1 - glycogenase, ec:3.1.3.12 - trehalose 6-phosphatase, ec:3.2.1.2 - saccharogen amylase, ec:3.2.1.39 - endo-1,3-beta-D-glucosidase	1, 1, 1, 1, 4, 2, 4	TR51860|c0_g1_i1, TR67372|c0_g1_i1, scaffold13574, TR74720|c4_g1_i10, C968526, TR54421|c0_g1_i2, scaffold13574, TR54421|c0_g1_i4, TR62588|c0_g1_i1, TR62588|c0_g1_i2, TR78467|c0_g1_i11, TR71697|c0_g1_i1, TR71697|c0_g1_i2, TR75135|c0_g1_i1	7	77	9.09091
Ascorbate and aldarate metabolism	map00053	ec:1.2.1.3 - dehydrogenase (NAD+), ec:3.2.1.31 - beta-glucuronide glucuronohydrolase glucuronidase, ec:1.1.1.22 - 6-dehydrogenase, ec:1.10.3.3 - oxidase	2, 2, 1, 4	TR66779|c3_g5_i11, TR64340|c2_g1_i1, TR70497|c0_g1_i6, TR70497|c0_g1_i7, TR40474|c0_g6_i1, TR71369|c0_g1_i4, TR71916|c0_g1_i11, scaffold14247, TR71916|c0_g1_i8	4	46	8.69565
Ether lipid metabolism	map00565	ec:2.3.1.25 - synthase, ec:3.1.4.3 - C	1, 1	Mj_1_GCCAAT_L005_R1_001_(paired)_trimmed_(paired)_contig_32189, TR61314|c0_g1_i1	2	23	8.69565
Tryptophan metabolism	map00380	ec:3.5.1.4 - acylamidase, ec:1.2.1.3 - dehydrogenase (NAD+), ec:2.3.1.61 - succinyltransferase, ec:1.11.1.6 - equilase, ec:1.14.14.1 - monooxygenase	1, 2, 1, 1, 1	C923616, TR66779|c3_g5_i11, TR64340|c2_g1_i1, TR70921|c0_g2_i2, Mj_1_GCCAAT_L005_R1_001_(paired)_trimmed_(paired)_contig_87583, TR79999|c24_g2_i1	5	58	8.62069
alpha-Linolenic acid metabolism	map00592	ec:1.1.1.1 - dehydrogenase	3	TR72553|c3_g1_i13, TR65825|c4_g2_i1, TR72553|c3_g1_i1	1	12	8.33333
One carbon pool by folate	map00670	ec:2.1.2.1 - hydroxymethyltransferase, ec:2.1.1.13 - synthase	2, 2	TR75981|c0_g1_i1, Mj_1_GCCAAT_L005_R1_001_(paired)_trimmed_(paired)_contig_227, TR68341|c1_g1_i4, TR72209|c0_g1_i2	2	24	8.33333
Glyoxylate and dicarboxylate metabolism	map00630	ec:6.2.1.8 - ligase, ec:3.1.3.18 - phosphatase, ec:1.1.1.37 - dehydrogenase, ec:1.11.1.6 - equilase, ec:2.1.2.1 - hydroxymethyltransferase, ec:4.2.1.3 - hydratase	2, 1, 1, 1, 2, 3	scaffold13363, TR52412|c0_g1_i1, TR71190|c0_g2_i4, TR46219|c0_g1_i1, Mj_1_GCCAAT_L005_R1_001_(paired)_trimmed_(paired)_contig_87583, TR75981|c0_g1_i1, Mj_1_GCCAAT_L005_R1_001_(paired)_trimmed_(paired)_contig_227, TR44806|c0_g1_i1, Mj_1_GCCAAT_L005_R1_001_(paired)_trimmed_(paired)_contig_538, TR77579|c0_g1_i3	6	73	8.21918
beta-Alanine metabolism	map00410	ec:1.2.1.3 - dehydrogenase (NAD+), ec:4.1.1.15 - decarboxylase, ec:1.2.1.5 - dehydrogenase [NAD(P)+]	2, 1, 2	TR66779|c3_g5_i11, TR64340|c2_g1_i1, C967830, TR66779|c3_g5_i11, TR64340|c2_g1_i1	3	37	8.10811
Nitrogen metabolism	map00910	ec:1.13.12.16 - monooxygenase, ec:4.2.1.1 - anhydrase, ec:4.2.1.104 - cyanate lyase	3, 3, 2	TR74743|c0_g1_i2, TR74743|c0_g1_i1, TR74743|c0_g1_i3, TR58255|c0_g2_i2, TR58255|c0_g2_i6, TR65040|c1_g1_i2, TR66779|c3_g5_i11, TR64340|c2_g1_i1	3	37	8.10811
Cysteine and methionine metabolism	map00270	ec:2.1.1.14 - S-methyltransferase, ec:2.7.2.4 - kinase, ec:1.1.1.37 - dehydrogenase, ec:1.14.17.4 - oxidase, ec:2.5.1.48 - gamma-synthase, ec:2.1.1.13 - synthase	2, 1, 1, 3, 1, 2	TR68341|c1_g1_i4, TR72209|c0_g1_i2, TR72784|c0_g1_i3, TR46219|c0_g1_i1, TR44806|c0_g1_i1, Mj_1_GCCAAT_L005_R1_001_(paired)_trimmed_(paired)_contig_2851, TR77579|c0_g1_i3, TR53263|c0_g1_i1, TR68341|c1_g1_i4, TR72209|c0_g1_i2	6	76	7.89474
Linoleic acid metabolism	map00591	ec:1.14.14.1 - monooxygenase	1	TR79999|c24_g2_i1	1	13	7.69231
Lysine biosynthesis	map00300	ec:5.1.1.7 - epimerase, ec:2.7.2.4 - kinase	1, 1	TR75094|c4_g3_i1, TR72784|c0_g1_i3	2	28	7.14286
Valine, leucine and isoleucine biosynthesis	map00290	ec:4.2.1.33 - dehydratase	1	Mj_1_GCCAAT_L005_R1_001_(paired)_trimmed_(paired)_contig_6993	1	14	7.14286
Cyanoamino acid metabolism	map00460	ec:1.14.14.37 - oxime monooxygenase, ec:2.1.2.1 - hydroxymethyltransferase	2, 2	Mj_1_GCCAAT_L005_R1_001_(paired)_trimmed_(paired)_contig_68163, TR52349|c1_g1_i1, TR75981|c0_g1_i1, Mj_1_GCCAAT_L005_R1_001_(paired)_trimmed_(paired)_contig_227	2	29	6.89655
Phenylpropanoid biosynthesis	map00940	ec:6.2.1.12 - ligase, ec:1.11.1.7 - lactoperoxidase	5, 5	scaffold13363, TR52412|c0_g1_i1, Mj_1_GCCAAT_L005_R1_001_(paired)_trimmed_(paired)_contig_2151, TR79207|c5_g1_i1, TR75211|c2_g1_i2, TR66216|c1_g1_i5, Mj_1_GCCAAT_L005_R1_001_(paired)_trimmed_(paired)_contig_34093, Mj_1_GCCAAT_L005_R1_001_(paired)_trimmed_(paired)_contig_87583, TR65701|c0_g1_i5, C958820	2	30	6.66667
Anthocyanin biosynthesis	map00942	ec:2.4.1.115 - 3-O-glucosyltransferase	6	TR51332|c0_g1_i1, scaffold12637, TR59395|c1_g1_i5, TR59395|c1_g1_i4, TR57059|c0_g1_i1, TR71322|c0_g1_i1	1	16	6.25
Flavone and flavonol biosynthesis	map00944	ec:1.14.14.81 - 3',5'-hydroxylase, ec:3.2.1.31 - beta-glucuronide glucuronohydrolase glucuronidase	1, 2	TR61991|c0_g1_i1, TR70497|c0_g1_i6, TR70497|c0_g1_i7	2	32	6.25
Galactose metabolism	map00052	ec:2.4.1.67 - galactosyltransferase, ec:2.4.1.82 - galactosyltransferase, ec:3.2.1.23 - lactase (ambiguous)	2, 2, 6	TR73972|c0_g1_i2, TR73972|c1_g1_i1, TR73972|c0_g1_i2, TR73972|c1_g1_i1, TR63671|c1_g1_i3, TR71697|c0_g1_i1, TR71697|c0_g1_i2, TR61997|c0_g1_i2, Mj_1_GCCAAT_L005_R1_001_(paired)_trimmed_(paired)_contig_13142, Mj_1_GCCAAT_L005_R1_001_(paired)_trimmed_(paired)_contig_563	3	48	6.25
Limonene and pinene degradation	map00903	ec:1.2.1.3 - dehydrogenase (NAD+)	2	TR66779|c3_g5_i11, TR64340|c2_g1_i1	1	16	6.25
Methane metabolism	map00680	ec:4.2.1.11 - hydratase, ec:1.1.1.37 - dehydrogenase, ec:1.1.3.13 - oxidase, ec:2.1.2.1 - hydroxymethyltransferase, ec:1.1.1.284 - dehydrogenase	1, 1, 1, 2, 1	TR69127|c0_g1_i1, TR46219|c0_g1_i1, Mj_1_GCCAAT_L005_R1_001_(paired)_trimmed_(paired)_contig_89591, TR75981|c0_g1_i1, Mj_1_GCCAAT_L005_R1_001_(paired)_trimmed_(paired)_contig_227, TR65825|c4_g2_i1	5	82	6.09756
Carbon fixation pathways in prokaryotes	map00720	ec:1.3.5.1 - dehydrogenase, ec:1.1.1.37 - dehydrogenase, ec:4.2.1.3 - hydratase	2, 1, 3	Mj_1_GCCAAT_L005_R1_001_(paired)_trimmed_(paired)_contig_642, TR62583|c0_g1_i1, TR46219|c0_g1_i1, TR44806|c0_g1_i1, Mj_1_GCCAAT_L005_R1_001_(paired)_trimmed_(paired)_contig_538, TR77579|c0_g1_i3	3	50	6
Diterpenoid biosynthesis	map00904	ec:1.14.14.106 - 13alpha-hydroxylase, ec:2.3.1.167 - III 10-O-acetyltransferase, ec:2.3.1.162 - O-acetyltransferase	3, 1, 1	Mj_1_GCCAAT_L005_R1_001_(paired)_trimmed_(paired)_contig_39565, C967440, TR66311|c1_g1_i1, TR65876|c0_g1_i1, Mj_1_GCCAAT_L005_R1_001_(paired)_trimmed_(paired)_contig_50632	3	50	6
Pentose and glucuronate interconversions	map00040	ec:4.2.2.2 - lyase, ec:3.2.1.31 - beta-glucuronide glucuronohydrolase glucuronidase, ec:1.1.1.22 - 6-dehydrogenase, ec:3.1.1.11 - pectin demethoxylase	1, 2, 1, 4	Mj_1_GCCAAT_L005_R1_001_(paired)_trimmed_(paired)_contig_90101, TR70497|c0_g1_i6, TR70497|c0_g1_i7, TR40474|c0_g6_i1, Mj_1_GCCAAT_L005_R1_001_(paired)_trimmed_(paired)_contig_15763, TR22679|c0_g1_i1, TR62331|c0_g1_i2, TR50409|c0_g1_i1	4	67	5.97015
Glycine, serine and threonine metabolism	map00260	ec:2.7.2.4 - kinase, ec:1.1.1.1 - dehydrogenase, ec:4.2.3.1 - synthase, ec:2.1.2.1 - hydroxymethyltransferase	1, 3, 2, 2	TR72784|c0_g1_i3, TR72553|c3_g1_i13, TR65825|c4_g2_i1, TR72553|c3_g1_i1, Mj_1_GCCAAT_L005_R1_001_(paired)_trimmed_(paired)_contig_17296, TR62912|c0_g1_i1, TR75981|c0_g1_i1, Mj_1_GCCAAT_L005_R1_001_(paired)_trimmed_(paired)_contig_227	4	68	5.88235
Purine metabolism	map00230	ec:3.6.1.15 - phosphatase, ec:3.1.7.2 - 3'-diphosphatase, ec:2.7.4.3 - kinase, ec:2.7.6.5 - diphosphokinase, ec:6.3.3.1 - cyclo-ligase, ec:2.7.6.1 - diphosphokinase	9, 3, 1, 2, 1, 2	TR47237|c0_g1_i4, TR65493|c0_g1_i1, TR47237|c0_g1_i1, Mj_1_GCCAAT_L005_R1_001_(paired)_trimmed_(paired)_contig_86620, Mj_1_GCCAAT_L005_R1_001_(paired)_trimmed_(paired)_contig_7636, TR79906|c3_g1_i1, TR63044|c0_g1_i1, Mj_1_GCCAAT_L005_R1_001_(paired)_trimmed_(paired)_contig_1878, Mj_1_GCCAAT_L005_R1_001_(paired)_trimmed_(paired)_contig_488, TR67375|c1_g1_i2, TR69555|c0_g1_i3, scaffold12129, TR7921…	6	109	5.50459
Carotenoid biosynthesis	map00906	ec:5.3.99.8 - synthase, ec:5.3.99.9 - synthase	1, 1	TR68979|c0_g1_i1, TR68979|c0_g1_i1	2	37	5.40541
Histidine metabolism	map00340	ec:1.2.1.3 - dehydrogenase (NAD+), ec:1.2.1.5 - dehydrogenase [NAD(P)+]	2, 2	TR66779|c3_g5_i11, TR64340|c2_g1_i1, TR66779|c3_g5_i11, TR64340|c2_g1_i1	2	38	5.26316
Peptidoglycan biosynthesis	map00550	ec:2.7.8.13 - MraY transferase	2	TR59426|c0_g1_i2, Mj_1_GCCAAT_L005_R1_001_(paired)_trimmed_(paired)_contig_1905	1	19	5.26316
Phenylalanine, tyrosine and tryptophan biosynthesis	map00400	ec:1.3.1.12 - dehydrogenase, ec:1.3.1.13 - dehydrogenase (NADP+)	1, 1	Mj_1_GCCAAT_L005_R1_001_(paired)_trimmed_(paired)_contig_4988, Mj_1_GCCAAT_L005_R1_001_(paired)_trimmed_(paired)_contig_4988	2	39	5.12821
Biotin metabolism	map00780	ec:1.1.1.100 - reductase	1	Mj_1_GCCAAT_L005_R1_001_(paired)_trimmed_(paired)_contig_38880	1	20	5
Ubiquinone and other terpenoid-quinone biosynthesis	map00130	ec:6.2.1.26 - ligase, ec:6.2.1.12 - ligase	2, 5	scaffold13363, TR52412|c0_g1_i1, scaffold13363, TR52412|c0_g1_i1, Mj_1_GCCAAT_L005_R1_001_(paired)_trimmed_(paired)_contig_2151, TR79207|c5_g1_i1, TR75211|c2_g1_i2	2	40	5
Tyrosine metabolism	map00350	ec:1.2.1.5 - dehydrogenase [NAD(P)+], ec:1.1.1.1 - dehydrogenase, ec:1.13.11.5 - 1,2-dioxygenase	2, 3, 1	TR66779|c3_g5_i11, TR64340|c2_g1_i1, TR72553|c3_g1_i13, TR65825|c4_g2_i1, TR72553|c3_g1_i1, TR60298|c0_g1_i5	3	61	4.91803
Phenylalanine metabolism	map00360	ec:3.5.1.4 - acylamidase, ec:1.2.1.5 - dehydrogenase [NAD(P)+], ec:3.5.1.32 - hydrolase	1, 2, 2	C923616, TR66779|c3_g5_i11, TR64340|c2_g1_i1, TR53222|c0_g1_i2, TR53520|c0_g1_i1	3	66	4.54545
Alanine, aspartate and glutamate metabolism	map00250	ec:2.6.1.2 - transaminase, ec:4.1.1.15 - decarboxylase	1, 1	TR69854|c0_g1_i2, C967830	2	50	4
Vitamin B6 metabolism	map00750	ec:4.2.3.1 - synthase	2	Mj_1_GCCAAT_L005_R1_001_(paired)_trimmed_(paired)_contig_17296, TR62912|c0_g1_i1	1	25	4
Aminobenzoate degradation	map00627	ec:3.5.1.4 - acylamidase, ec:1.14.14.1 - monooxygenase	1, 1	C923616, TR79999|c24_g2_i1	2	51	3.92157
Arachidonic acid metabolism	map00590	ec:1.14.14.1 - monooxygenase	1	TR79999|c24_g2_i1	1	26	3.84615
Lysine degradation	map00310	ec:1.2.1.3 - dehydrogenase (NAD+), ec:2.3.1.61 - succinyltransferase	2, 1	TR66779|c3_g5_i11, TR64340|c2_g1_i1, TR70921|c0_g2_i2	2	53	3.77358
Sphingolipid metabolism	map00600	ec:3.2.1.23 - lactase (ambiguous)	6	TR63671|c1_g1_i3, TR71697|c0_g1_i1, TR71697|c0_g1_i2, TR61997|c0_g1_i2, Mj_1_GCCAAT_L005_R1_001_(paired)_trimmed_(paired)_contig_13142, Mj_1_GCCAAT_L005_R1_001_(paired)_trimmed_(paired)_contig_563	1	27	3.7037
Tropane, piperidine and pyridine alkaloid biosynthesis	map00960	ec:1.14.11.11 - (6S)-dioxygenase	1	TR66155|c1_g2_i3	1	27	3.7037
Butanoate metabolism	map00650	ec:1.3.5.1 - dehydrogenase, ec:4.1.1.15 - decarboxylase	2, 1	Mj_1_GCCAAT_L005_R1_001_(paired)_trimmed_(paired)_contig_642, TR62583|c0_g1_i1, C967830	2	55	3.63636
Arginine biosynthesis	map00220	ec:2.6.1.2 - transaminase	1	TR69854|c0_g1_i2	1	28	3.57143
Arginine and proline metabolism	map00330	ec:3.5.1.4 - acylamidase, ec:1.2.1.3 - dehydrogenase (NAD+), ec:4.1.1.19 - decarboxylase	1, 2, 2	C923616, TR66779|c3_g5_i11, TR64340|c2_g1_i1, Mj_1_GCCAAT_L005_R1_001_(paired)_trimmed_(paired)_contig_5504, TR72902|c0_g1_i1	3	86	3.48837
Aminoacyl-tRNA biosynthesis	map00970	ec:6.1.1.20 - ligase	1	TR74198|c1_g5_i7	1	31	3.22581
Glycerophospholipid metabolism	map00564	ec:2.7.1.107 - kinase (ATP), ec:3.1.4.3 - C	1, 1	Mj_1_GCCAAT_L005_R1_001_(paired)_trimmed_(paired)_contig_24325, TR61314|c0_g1_i1	2	62	3.22581
Pantothenate and CoA biosynthesis	map00770	ec:1.2.1.3 - dehydrogenase (NAD+)	2	TR66779|c3_g5_i11, TR64340|c2_g1_i1	1	31	3.22581
Porphyrin and chlorophyll metabolism	map00860	ec:4.99.1.1 - ferrochelatase, ec:3.2.1.31 - beta-glucuronide glucuronohydrolase glucuronidase, ec:1.16.3.1 - ceruloplasmin	1, 2, 2	TR68890|c2_g1_i2, TR70497|c0_g1_i6, TR70497|c0_g1_i7, TR62433|c2_g1_i5, TR62433|c2_g1_i9	3	105	2.85714
Steroid hormone biosynthesis	map00140	ec:1.14.14.1 - monooxygenase	1	TR79999|c24_g2_i1	1	36	2.77778
Valine, leucine and isoleucine degradation	map00280	ec:1.2.1.3 - dehydrogenase (NAD+)	2	TR66779|c3_g5_i11, TR64340|c2_g1_i1	1	36	2.77778
Glutathione metabolism	map00480	ec:2.5.1.18 - transferase	2	TR65701|c0_g1_i5, TR44735|c0_g1_i1	1	38	2.63158
Amino sugar and nucleotide sugar metabolism	map00520	ec:2.4.1.43 - 4-alpha-galacturonosyltransferase, ec:5.4.99.30 - mutase, ec:1.1.1.22 - 6-dehydrogenase	2, 1, 1	TR78423|c2_g1_i7, Mj_1_GCCAAT_L005_R1_001_(paired)_trimmed_(paired)_contig_26716, scaffold10702, TR40474|c0_g6_i1	3	119	2.52101
Monoterpenoid biosynthesis	map00902	ec:4.2.3.15 - synthase	1	scaffold13574	1	43	2.32558
Sulfur metabolism	map00920	ec:2.5.1.48 - gamma-synthase	1	TR53263|c0_g1_i1	1	48	2.08333
Folate biosynthesis	map00790	ec:3.5.4.25 - cyclohydrolase II	1	TR77895|c1_g1_i1	1	51	1.96078
Isoquinoline alkaloid biosynthesis	map00950	ec:2.3.1.150 - 7-O-acetyltransferase	4	Mj_1_GCCAAT_L005_R1_001_(paired)_trimmed_(paired)_contig_68581, TR77247|c0_g1_i1, TR77247|c0_g1_i2, TR54024|c1_g1_i1	1	55	1.81818
Pentose phosphate pathway	map00030	ec:2.7.6.1 - diphosphokinase	2	TR71021|c1_g2_i2, TR71021|c1_g2_i1	1	55	1.81818
Nicotinate and nicotinamide metabolism	map00760	ec:2.7.1.23 - kinase	1	Mj_1_GCCAAT_L005_R1_001_(paired)_trimmed_(paired)_contig_24325	1	59	1.69492
Sesquiterpenoid and triterpenoid biosynthesis	map00909	ec:4.2.3.22 - synthase	2	TR78346|c0_g3_i2, TR78346|c0_g3_i3	1	80	1.25
