# Supplementary material for: Gene-Metabolite Network Analysis Revealed Tissue-Specific Accumulation of Therapeutic Metabolites in Mallotus japonicus
Source: Int J Mol Sci. 2021 Aug 17;22(16):8835. doi: 10.3390/ijms22168835 (PMC8396295; doi:10.3390/ijms22168835)
Supplement: Supplementary file 1 [file ijms-22-08835-s001.zip › Supplementary_Table S14_GO_enrichment_analysis_for_highly_correlated_trans_modules_Megha.xlsx]

## Sheet: TransM4_EnrichGO
Table S14 Gene ontology (GO) enrichment analysis of transcript modules sharing high correlation coefficient (PCC > 0.7) with the identified metabolite modules in Mallotus japonicus.
Tags	GO ID	GO Name	GO Category	FDR	P-Value	Nr Test	Nr Reference	Non Annot Test	Non Annot Reference
[OVER]	GO:0010027	thylakoid membrane organization	BIOLOGICAL_PROCESS	0	0	379	516	3863	221492
[OVER]	GO:0009902	chloroplast relocation	BIOLOGICAL_PROCESS	1.20296e-212	1.11703e-214	208	309	4034	221699
[OVER]	GO:0010103	stomatal complex morphogenesis	BIOLOGICAL_PROCESS	8.02222e-137	1.13044e-138	160	391	4082	221617
[OVER]	GO:0009543	chloroplast thylakoid lumen	CELLULAR_COMPONENT	1.67075e-132	2.40876e-134	128	181	4114	221827
[OVER]	GO:0055114	oxidation-reduction process	BIOLOGICAL_PROCESS	4.46959e-110	7.28124e-112	527	8795	3715	213213
[OVER]	GO:0019761	glucosinolate biosynthetic process	BIOLOGICAL_PROCESS	1.65488e-106	2.83069e-108	139	438	4103	221570
[OVER]	GO:0045893	positive regulation of transcription, DNA-templated	BIOLOGICAL_PROCESS	3.47402e-105	6.05555e-107	220	1575	4022	220433
[OVER]	GO:0016226	iron-sulfur cluster assembly	BIOLOGICAL_PROCESS	1.61911e-104	2.86183e-106	119	271	4123	221737
[OVER]	GO:0009773	photosynthetic electron transport in photosystem I	BIOLOGICAL_PROCESS	1.79392e-98	3.34615e-100	92	116	4150	221892
[OVER]	GO:0035304	regulation of protein dephosphorylation	BIOLOGICAL_PROCESS	1.52928e-94	2.96463e-96	125	405	4117	221603
[OVER]	GO:0043085	positive regulation of catalytic activity	BIOLOGICAL_PROCESS	1.12609e-85	2.36646e-87	193	1522	4049	220486
[OVER]	GO:0010114	response to red light	BIOLOGICAL_PROCESS	1.09967e-81	2.41844e-83	104	310	4138	221698
[OVER]	GO:0010218	response to far red light	BIOLOGICAL_PROCESS	4.50664e-81	1.00947e-82	102	296	4140	221712
[OVER]	GO:0009965	leaf morphogenesis	BIOLOGICAL_PROCESS	2.08784e-80	4.77873e-82	137	717	4105	221291
[OVER]	GO:0009793	embryo development ending in seed dormancy	BIOLOGICAL_PROCESS	1.26196e-77	3.02204e-79	213	2125	4029	219883
[OVER]	GO:0006636	unsaturated fatty acid biosynthetic process	BIOLOGICAL_PROCESS	2.04995e-75	5.12614e-77	98	306	4144	221702
[OVER]	GO:0006655	phosphatidylglycerol biosynthetic process	BIOLOGICAL_PROCESS	4.15036e-73	1.07503e-74	86	213	4156	221795
[OVER]	GO:0009073	aromatic amino acid family biosynthetic process	BIOLOGICAL_PROCESS	1.99513e-68	5.49283e-70	87	259	4155	221749
[OVER]	GO:0048481	plant ovule development	BIOLOGICAL_PROCESS	2.88211e-65	8.12258e-67	100	435	4142	221573
[OVER]	GO:0005524	ATP binding	MOLECULAR_FUNCTION	7.15101e-64	2.03865e-65	474	10288	3768	211720
[OVER]	GO:0010287	plastoglobule	CELLULAR_COMPONENT	5.08839e-62	1.47135e-63	74	190	4168	221818
[OVER]	GO:0042742	defense response to bacterium	BIOLOGICAL_PROCESS	6.11926e-62	1.77442e-63	149	1274	4093	220734
[OVER]	GO:0009706	chloroplast inner membrane	CELLULAR_COMPONENT	2.6793e-54	8.24936e-56	76	278	4166	221730
[OVER]	GO:0010264	myo-inositol hexakisphosphate biosynthetic process	BIOLOGICAL_PROCESS	1.58015e-48	5.01962e-50	62	187	4180	221821
[OVER]	GO:0010304	PSII associated light-harvesting complex II catabolic process	BIOLOGICAL_PROCESS	3.69292e-48	1.17914e-49	49	82	4193	221926
[OVER]	GO:0048046	apoplast	CELLULAR_COMPONENT	1.43061e-45	4.70772e-47	122	1181	4120	220827
[OVER]	GO:0009106	lipoate metabolic process	BIOLOGICAL_PROCESS	9.40393e-45	3.13286e-46	55	152	4187	221856
[OVER]	GO:0010155	regulation of proton transport	BIOLOGICAL_PROCESS	3.05752e-44	1.02357e-45	65	262	4177	221746
[OVER]	GO:0010598	NAD(P)H dehydrogenase complex (plastoquinone)	CELLULAR_COMPONENT	2.93914e-39	1.03661e-40	30	16	4212	221992
[OVER]	GO:0003755	peptidyl-prolyl cis-trans isomerase activity	MOLECULAR_FUNCTION	5.46583e-38	1.97227e-39	62	303	4180	221705
[OVER]	GO:0000413	protein peptidyl-prolyl isomerization	BIOLOGICAL_PROCESS	6.44636e-38	2.33134e-39	62	304	4180	221704
[OVER]	GO:0010319	stromule	CELLULAR_COMPONENT	6.74767e-37	2.47329e-38	50	172	4192	221836
[OVER]	GO:0009654	photosystem II oxygen evolving complex	CELLULAR_COMPONENT	1.53608e-36	5.65534e-38	42	99	4200	221909
[OVER]	GO:0031348	negative regulation of defense response	BIOLOGICAL_PROCESS	3.1062e-36	1.14613e-37	87	743	4155	221265
[OVER]	GO:0009409	response to cold	BIOLOGICAL_PROCESS	6.45094e-35	2.41707e-36	134	1841	4108	220167
[OVER]	GO:0009697	salicylic acid biosynthetic process	BIOLOGICAL_PROCESS	2.24571e-33	8.61554e-35	71	520	4171	221488
[OVER]	GO:0050832	defense response to fungus	BIOLOGICAL_PROCESS	8.59729e-33	3.31231e-34	95	1003	4147	221005
[OVER]	GO:0009862	systemic acquired resistance, salicylic acid mediated signaling pathway	BIOLOGICAL_PROCESS	1.65756e-32	6.41315e-34	69	504	4173	221504
[OVER]	GO:0045038	protein import into chloroplast thylakoid membrane	BIOLOGICAL_PROCESS	2.9285e-32	1.14259e-33	24	11	4218	221997
[OVER]	GO:0015996	chlorophyll catabolic process	BIOLOGICAL_PROCESS	2.05696e-30	8.17623e-32	55	319	4187	221689
[OVER]	GO:0030003	cellular cation homeostasis	BIOLOGICAL_PROCESS	8.52781e-30	3.45225e-31	85	884	4157	221124
[OVER]	GO:0009595	detection of biotic stimulus	BIOLOGICAL_PROCESS	4.99818e-28	2.09665e-29	49	270	4193	221738
[OVER]	GO:0019843	rRNA binding	MOLECULAR_FUNCTION	1.30327e-27	5.50946e-29	62	489	4180	221519
[OVER]	GO:0009735	response to cytokinin	BIOLOGICAL_PROCESS	1.82615e-26	7.89838e-28	72	713	4170	221295
[OVER]	GO:0009772	photosynthetic electron transport in photosystem II	BIOLOGICAL_PROCESS	1.07391e-25	4.74979e-27	24	31	4218	221977
[OVER]	GO:0005528	FK506 binding	MOLECULAR_FUNCTION	1.09735e-25	4.86242e-27	29	66	4213	221942
[OVER]	GO:0046686	response to cadmium ion	BIOLOGICAL_PROCESS	1.28694e-25	5.71297e-27	103	1474	4139	220534
[OVER]	GO:2001070	starch binding	MOLECULAR_FUNCTION	1.72176e-25	7.65724e-27	25	38	4217	221970
[OVER]	GO:0043900	regulation of multi-organism process	BIOLOGICAL_PROCESS	8.59727e-24	3.99156e-25	47	313	4195	221695
[OVER]	GO:0005983	starch catabolic process	BIOLOGICAL_PROCESS	8.60655e-24	4.00288e-25	28	71	4214	221937
[OVER]	GO:0009508	plastid chromosome	CELLULAR_COMPONENT	1.01881e-23	4.75504e-25	27	63	4215	221945
[OVER]	GO:0005509	calcium ion binding	MOLECULAR_FUNCTION	3.0372e-23	1.42496e-24	78	956	4164	221052
[OVER]	GO:0016168	chlorophyll binding	MOLECULAR_FUNCTION	4.4097e-23	2.07608e-24	43	263	4199	221745
[OVER]	GO:0032544	plastid translation	BIOLOGICAL_PROCESS	8.55624e-23	4.04918e-24	21	26	4221	221982
[OVER]	GO:0009684	indoleacetic acid biosynthetic process	BIOLOGICAL_PROCESS	1.01535e-22	4.82163e-24	41	239	4201	221769
[OVER]	GO:0004222	metalloendopeptidase activity	MOLECULAR_FUNCTION	1.70666e-22	8.20174e-24	40	228	4202	221780
[OVER]	GO:0010200	response to chitin	BIOLOGICAL_PROCESS	3.50334e-22	1.70073e-23	74	903	4168	221105
[OVER]	GO:0005525	GTP binding	MOLECULAR_FUNCTION	4.83365e-22	2.35836e-23	96	1466	4146	220542
[OVER]	GO:0000165	MAPK cascade	BIOLOGICAL_PROCESS	1.1089e-20	5.5639e-22	85	1242	4157	220766
[OVER]	GO:0032440	2-alkenal reductase [NAD(P)+] activity	MOLECULAR_FUNCTION	2.46662e-20	1.24567e-21	95	1530	4147	220478
[OVER]	GO:0009533	chloroplast stromal thylakoid	CELLULAR_COMPONENT	2.63116e-20	1.3309e-21	19	25	4223	221983
[OVER]	GO:0061077	chaperone-mediated protein folding	BIOLOGICAL_PROCESS	3.23984e-20	1.64671e-21	23	54	4219	221954
[OVER]	GO:0045156	electron transporter, transferring electrons within the cyclic electron transport pathway of photosynthesis activity	MOLECULAR_FUNCTION	7.22983e-20	3.71883e-21	17	16	4225	221992
[OVER]	GO:0018298	protein-chromophore linkage	BIOLOGICAL_PROCESS	1.96366e-19	1.01566e-20	40	284	4202	221724
[OVER]	GO:0008568	microtubule-severing ATPase activity	MOLECULAR_FUNCTION	2.08088e-19	1.07798e-20	35	205	4207	221803
[OVER]	GO:0010206	photosystem II repair	BIOLOGICAL_PROCESS	1.29751e-18	6.76391e-20	22	57	4220	221951
[OVER]	GO:0019253	reductive pentose-phosphate cycle	BIOLOGICAL_PROCESS	1.4913e-18	7.8106e-20	25	87	4217	221921
[OVER]	GO:0043953	protein transport by the Tat complex	BIOLOGICAL_PROCESS	1.88565e-18	9.9374e-20	11	0	4231	222008
[OVER]	GO:0009977	proton motive force dependent protein transmembrane transporter activity	MOLECULAR_FUNCTION	1.88565e-18	9.9374e-20	11	0	4231	222008
[OVER]	GO:0045454	cell redox homeostasis	BIOLOGICAL_PROCESS	3.72357e-18	1.98356e-19	48	465	4194	221543
[OVER]	GO:0019898	extrinsic component of membrane	CELLULAR_COMPONENT	5.1507e-18	2.75638e-19	51	532	4191	221476
[OVER]	GO:0033281	TAT protein transport complex	CELLULAR_COMPONENT	2.16054e-17	1.17205e-18	11	1	4231	222007
[OVER]	GO:0046777	protein autophosphorylation	BIOLOGICAL_PROCESS	2.83885e-17	1.54232e-18	69	989	4173	221019
[OVER]	GO:0009744	response to sucrose	BIOLOGICAL_PROCESS	3.19119e-17	1.73635e-18	58	718	4184	221290
[OVER]	GO:0003959	NADPH dehydrogenase activity	MOLECULAR_FUNCTION	5.00183e-17	2.75005e-18	15	16	4227	221992
[OVER]	GO:0004813	alanine-tRNA ligase activity	MOLECULAR_FUNCTION	5.14326e-17	2.84038e-18	17	28	4225	221980
[OVER]	GO:0010258	NADH dehydrogenase complex (plastoquinone) assembly	BIOLOGICAL_PROCESS	5.70431e-17	3.15487e-18	12	4	4230	222004
[OVER]	GO:0004252	serine-type endopeptidase activity	MOLECULAR_FUNCTION	5.33869e-16	3.02223e-17	45	468	4197	221540
[OVER]	GO:0030076	light-harvesting complex	CELLULAR_COMPONENT	5.99922e-16	3.40104e-17	22	81	4220	221927
[OVER]	GO:0019013	viral nucleocapsid	CELLULAR_COMPONENT	7.61423e-16	4.32282e-17	35	275	4207	221733
[OVER]	GO:0010228	vegetative to reproductive phase transition of meristem	BIOLOGICAL_PROCESS	1.20189e-15	6.86264e-17	89	1644	4153	220364
[OVER]	GO:0031072	heat shock protein binding	MOLECULAR_FUNCTION	3.05363e-15	1.76099e-16	29	186	4213	221822
[OVER]	GO:0004619	phosphoglycerate mutase activity	MOLECULAR_FUNCTION	3.40823e-15	1.96826e-16	16	31	4226	221977
[OVER]	GO:0006782	protoporphyrinogen IX biosynthetic process	BIOLOGICAL_PROCESS	3.97661e-15	2.30298e-16	18	48	4224	221960
[OVER]	GO:0003700	DNA-binding transcription factor activity	MOLECULAR_FUNCTION	4.2381e-15	2.46478e-16	117	2573	4125	219435
[OVER]	GO:0009853	photorespiration	BIOLOGICAL_PROCESS	4.33043e-15	2.522e-16	51	636	4191	221372
[OVER]	GO:0016987	sigma factor activity	MOLECULAR_FUNCTION	4.96659e-15	2.90058e-16	16	32	4226	221976
[OVER]	GO:0043022	ribosome binding	MOLECULAR_FUNCTION	1.75355e-14	1.04124e-15	22	98	4220	221910
[OVER]	GO:0042744	hydrogen peroxide catabolic process	BIOLOGICAL_PROCESS	4.72786e-14	2.83048e-15	42	467	4200	221541
[OVER]	GO:0030095	chloroplast photosystem II	CELLULAR_COMPONENT	8.24878e-14	4.96526e-15	10	4	4232	222004
[OVER]	GO:0004615	phosphomannomutase activity	MOLECULAR_FUNCTION	4.07374e-13	2.48864e-14	12	15	4230	221993
[OVER]	GO:0010297	heteropolysaccharide binding	MOLECULAR_FUNCTION	9.40086e-13	5.79657e-14	11	11	4231	221997
[OVER]	GO:0010236	plastoquinone biosynthetic process	BIOLOGICAL_PROCESS	1.88127e-12	1.17531e-13	12	18	4230	221990
[OVER]	GO:0032259	methylation	BIOLOGICAL_PROCESS	2.06293e-12	1.29216e-13	137	3533	4105	218475
[OVER]	GO:0051537	2 iron, 2 sulfur cluster binding	MOLECULAR_FUNCTION	2.36892e-12	1.48576e-13	26	194	4216	221814
[OVER]	GO:0006096	glycolytic process	BIOLOGICAL_PROCESS	2.81911e-12	1.775e-13	63	1095	4179	220913
[OVER]	GO:0005759	mitochondrial matrix	CELLULAR_COMPONENT	4.56329e-12	2.89922e-13	51	772	4191	221236
[OVER]	GO:0042631	cellular response to water deprivation	BIOLOGICAL_PROCESS	5.51293e-12	3.52501e-13	28	239	4214	221769
[OVER]	GO:0004331	fructose-2,6-bisphosphate 2-phosphatase activity	MOLECULAR_FUNCTION	6.53626e-12	4.20595e-13	10	9	4232	221999
[OVER]	GO:0004610	phosphoacetylglucosamine mutase activity	MOLECULAR_FUNCTION	7.1032e-12	4.57655e-13	12	21	4230	221987
[OVER]	GO:0009569	chloroplast starch grain	CELLULAR_COMPONENT	8.09443e-12	5.22179e-13	9	5	4233	222003
[OVER]	GO:0005506	iron ion binding	MOLECULAR_FUNCTION	8.80381e-12	5.69376e-13	70	1337	4172	220671
[OVER]	GO:0003924	GTPase activity	MOLECULAR_FUNCTION	1.07578e-11	6.98378e-13	56	930	4186	221078
[OVER]	GO:0007623	circadian rhythm	BIOLOGICAL_PROCESS	1.17068e-11	7.60937e-13	45	635	4197	221373
[OVER]	GO:0006662	glycerol ether metabolic process	BIOLOGICAL_PROCESS	1.32438e-11	8.65154e-13	20	112	4222	221896
[OVER]	GO:0051082	unfolded protein binding	MOLECULAR_FUNCTION	1.4508e-11	9.50107e-13	36	420	4206	221588
[OVER]	GO:0047268	galactinol-raffinose galactosyltransferase activity	MOLECULAR_FUNCTION	1.58541e-11	1.03955e-12	12	23	4230	221985
[OVER]	GO:0009408	response to heat	BIOLOGICAL_PROCESS	1.74613e-11	1.14636e-12	57	971	4185	221037
[OVER]	GO:0009407	toxin catabolic process	BIOLOGICAL_PROCESS	1.78138e-11	1.1724e-12	38	470	4204	221538
[OVER]	GO:0000025	maltose catabolic process	BIOLOGICAL_PROCESS	1.94295e-11	1.28348e-12	9	6	4233	222002
[OVER]	GO:0003743	translation initiation factor activity	MOLECULAR_FUNCTION	2.24632e-11	1.48937e-12	41	547	4201	221461
[OVER]	GO:0006048	UDP-N-acetylglucosamine biosynthetic process	BIOLOGICAL_PROCESS	2.30285e-11	1.53248e-12	12	24	4230	221984
[OVER]	GO:0015035	protein disulfide oxidoreductase activity	MOLECULAR_FUNCTION	2.72915e-11	1.82506e-12	27	238	4215	221770
[OVER]	GO:0008540	proteasome regulatory particle, base subcomplex	CELLULAR_COMPONENT	2.9659e-11	1.98581e-12	13	33	4229	221975
[OVER]	GO:0005774	vacuolar membrane	CELLULAR_COMPONENT	5.64578e-11	3.8031e-12	96	2249	4146	219759
[OVER]	GO:0046524	sucrose-phosphate synthase activity	MOLECULAR_FUNCTION	7.20334e-11	4.86403e-12	10	13	4232	221995
[OVER]	GO:0006003	fructose 2,6-bisphosphate metabolic process	BIOLOGICAL_PROCESS	8.89213e-11	6.02611e-12	9	8	4233	222000
[OVER]	GO:0070143	mitochondrial alanyl-tRNA aminoacylation	BIOLOGICAL_PROCESS	9.38875e-11	6.37796e-12	7	1	4235	222007
[OVER]	GO:0009664	plant-type cell wall organization	BIOLOGICAL_PROCESS	1.49033e-10	1.0197e-11	55	971	4187	221037
[OVER]	GO:0003873	6-phosphofructo-2-kinase activity	MOLECULAR_FUNCTION	1.7257e-10	1.18495e-11	9	9	4233	221999
[OVER]	GO:0010190	cytochrome b6f complex assembly	BIOLOGICAL_PROCESS	1.91104e-10	1.31533e-11	11	22	4231	221986
[OVER]	GO:0006352	DNA-templated transcription, initiation	BIOLOGICAL_PROCESS	2.1697e-10	1.49512e-11	29	305	4213	221703
[OVER]	GO:0006635	fatty acid beta-oxidation	BIOLOGICAL_PROCESS	2.18945e-10	1.51052e-11	49	809	4193	221199
[OVER]	GO:0046835	carbohydrate phosphorylation	BIOLOGICAL_PROCESS	2.32472e-10	1.60574e-11	23	186	4219	221822
[OVER]	GO:0000311	plastid large ribosomal subunit	CELLULAR_COMPONENT	2.59348e-10	1.7956e-11	8	5	4234	222003
[OVER]	GO:0006354	DNA-templated transcription, elongation	BIOLOGICAL_PROCESS	2.63107e-10	1.82591e-11	24	206	4218	221802
[OVER]	GO:0005507	copper ion binding	MOLECULAR_FUNCTION	3.63903e-10	2.5432e-11	49	822	4193	221186
[OVER]	GO:0048038	quinone binding	MOLECULAR_FUNCTION	3.85982e-10	2.70065e-11	17	92	4225	221916
[OVER]	GO:0006413	translational initiation	BIOLOGICAL_PROCESS	3.94887e-10	2.76617e-11	43	658	4199	221350
[OVER]	GO:0001666	response to hypoxia	BIOLOGICAL_PROCESS	5.1478e-10	3.63118e-11	22	176	4220	221832
[OVER]	GO:0004134	4-alpha-glucanotransferase activity	MOLECULAR_FUNCTION	5.60324e-10	3.957e-11	9	11	4233	221997
[OVER]	GO:0030794	(S)-coclaurine-N-methyltransferase activity	MOLECULAR_FUNCTION	6.11586e-10	4.32897e-11	6	0	4236	222008
[OVER]	GO:0034256	chlorophyll(ide) b reductase activity	MOLECULAR_FUNCTION	6.11586e-10	4.32897e-11	6	0	4236	222008
[OVER]	GO:0005986	sucrose biosynthetic process	BIOLOGICAL_PROCESS	6.60351e-10	4.69566e-11	14	56	4228	221952
[OVER]	GO:0009611	response to wounding	BIOLOGICAL_PROCESS	7.78857e-10	5.55738e-11	53	959	4189	221049
[OVER]	GO:0008266	poly(U) RNA binding	MOLECULAR_FUNCTION	9.74768e-10	7.01084e-11	14	58	4228	221950
[UNDER]	GO:0015074	DNA integration	BIOLOGICAL_PROCESS	1.16427e-09	8.39278e-11	2	1575	4240	220433
[OVER]	GO:0003735	structural constituent of ribosome	MOLECULAR_FUNCTION	1.17064e-09	8.44819e-11	107	2785	4135	219223
[OVER]	GO:0070681	glutaminyl-tRNAGln biosynthesis via transamidation	BIOLOGICAL_PROCESS	1.20034e-09	8.68212e-11	8	7	4234	222001
[OVER]	GO:0030956	glutamyl-tRNA(Gln) amidotransferase complex	CELLULAR_COMPONENT	1.20034e-09	8.68212e-11	8	7	4234	222001
[OVER]	GO:0016123	xanthophyll biosynthetic process	BIOLOGICAL_PROCESS	1.24352e-09	9.0147e-11	12	37	4230	221971
[OVER]	GO:0030170	pyridoxal phosphate binding	MOLECULAR_FUNCTION	1.31208e-09	9.53305e-11	38	552	4204	221456
[OVER]	GO:0006833	water transport	BIOLOGICAL_PROCESS	1.51286e-09	1.10288e-10	35	478	4207	221530
[OVER]	GO:0019375	galactolipid biosynthetic process	BIOLOGICAL_PROCESS	1.82727e-09	1.33358e-10	29	337	4213	221671
[OVER]	GO:0050567	glutaminyl-tRNA synthase (glutamine-hydrolyzing) activity	MOLECULAR_FUNCTION	2.33452e-09	1.70758e-10	8	8	4234	222000
[OVER]	GO:0009840	chloroplastic endopeptidase Clp complex	CELLULAR_COMPONENT	2.49604e-09	1.8298e-10	9	14	4233	221994
[OVER]	GO:0016120	carotene biosynthetic process	BIOLOGICAL_PROCESS	4.30763e-09	3.17186e-10	8	9	4234	221999
[OVER]	GO:0006855	drug transmembrane transport	BIOLOGICAL_PROCESS	4.31404e-09	3.1801e-10	32	423	4210	221585
[OVER]	GO:0004614	phosphoglucomutase activity	MOLECULAR_FUNCTION	6.24487e-09	4.61867e-10	10	24	4232	221984
[OVER]	GO:0050661	NADP binding	MOLECULAR_FUNCTION	8.17478e-09	6.07931e-10	28	338	4214	221670
[OVER]	GO:0009501	amyloplast	CELLULAR_COMPONENT	9.02284e-09	6.72469e-10	16	100	4226	221908
[OVER]	GO:0009505	plant-type cell wall	CELLULAR_COMPONENT	9.95412e-09	7.42687e-10	43	737	4199	221271
[OVER]	GO:0002161	aminoacyl-tRNA editing activity	MOLECULAR_FUNCTION	1.11448e-08	8.33339e-10	14	72	4228	221936
[OVER]	GO:0004765	shikimate kinase activity	MOLECULAR_FUNCTION	1.26852e-08	9.53689e-10	8	11	4234	221997
[OVER]	GO:0016036	cellular response to phosphate starvation	BIOLOGICAL_PROCESS	1.37746e-08	1.03896e-09	34	497	4208	221511
[OVER]	GO:0003746	translation elongation factor activity	MOLECULAR_FUNCTION	1.66203e-08	1.25766e-09	34	501	4208	221507
[OVER]	GO:0061025	membrane fusion	BIOLOGICAL_PROCESS	1.82087e-08	1.37933e-09	48	902	4194	221106
[OVER]	GO:0006000	fructose metabolic process	BIOLOGICAL_PROCESS	1.87383e-08	1.42098e-09	9	19	4233	221989
[OVER]	GO:0020037	heme binding	MOLECULAR_FUNCTION	2.39987e-08	1.83162e-09	60	1286	4182	220722
[OVER]	GO:0047538	2-carboxy-D-arabinitol-1-phosphatase activity	MOLECULAR_FUNCTION	3.01629e-08	2.31156e-09	5	0	4237	222008
[OVER]	GO:0031408	oxylipin biosynthetic process	BIOLOGICAL_PROCESS	4.76079e-08	3.68005e-09	21	209	4221	221799
[OVER]	GO:0004176	ATP-dependent peptidase activity	MOLECULAR_FUNCTION	5.29855e-08	4.11299e-09	16	115	4226	221893
[OVER]	GO:0016720	delta12-fatty acid dehydrogenase activity	MOLECULAR_FUNCTION	5.85753e-08	4.57075e-09	7	8	4235	222000
[OVER]	GO:0043609	regulation of carbon utilization	BIOLOGICAL_PROCESS	6.89675e-08	5.39291e-09	9	23	4233	221985
[OVER]	GO:0010075	regulation of meristem growth	BIOLOGICAL_PROCESS	7.06193e-08	5.52783e-09	35	561	4207	221447
[OVER]	GO:0006450	regulation of translational fidelity	BIOLOGICAL_PROCESS	7.09455e-08	5.55914e-09	14	85	4228	221923
[OVER]	GO:0005786	signal recognition particle, endoplasmic reticulum targeting	CELLULAR_COMPONENT	7.38278e-08	5.79101e-09	10	33	4232	221975
[OVER]	GO:0007030	Golgi organization	BIOLOGICAL_PROCESS	7.48161e-08	5.88071e-09	38	647	4204	221361
[OVER]	GO:0042549	photosystem II stabilization	BIOLOGICAL_PROCESS	9.23738e-08	7.29089e-09	9	24	4233	221984
[OVER]	GO:0003879	ATP phosphoribosyltransferase activity	MOLECULAR_FUNCTION	1.07632e-07	8.52145e-09	6	4	4236	222004
[OVER]	GO:0000373	Group II intron splicing	BIOLOGICAL_PROCESS	1.17256e-07	9.31211e-09	10	35	4232	221973
[OVER]	GO:0010205	photoinhibition	BIOLOGICAL_PROCESS	1.2251e-07	9.74934e-09	9	25	4233	221983
[OVER]	GO:0003899	DNA-directed 5'-3' RNA polymerase activity	MOLECULAR_FUNCTION	1.25733e-07	1.0016e-08	24	290	4218	221718
[OVER]	GO:0003756	protein disulfide isomerase activity	MOLECULAR_FUNCTION	1.48506e-07	1.18544e-08	12	61	4230	221947
[OVER]	GO:0035673	oligopeptide transmembrane transporter activity	MOLECULAR_FUNCTION	1.51258e-07	1.20864e-08	14	91	4228	221917
[OVER]	GO:0048564	photosystem I assembly	BIOLOGICAL_PROCESS	1.66594e-07	1.3366e-08	7	10	4235	221998
[OVER]	GO:0010729	positive regulation of hydrogen peroxide biosynthetic process	BIOLOGICAL_PROCESS	1.68798e-07	1.36529e-08	5	1	4237	222007
[OVER]	GO:0033614	chloroplast proton-transporting ATP synthase complex assembly	BIOLOGICAL_PROCESS	1.68798e-07	1.36529e-08	5	1	4237	222007
[OVER]	GO:0000372	Group I intron splicing	BIOLOGICAL_PROCESS	1.68798e-07	1.36529e-08	5	1	4237	222007
[OVER]	GO:0090351	seedling development	BIOLOGICAL_PROCESS	1.72682e-07	1.39811e-08	45	881	4197	221127
[OVER]	GO:0008728	GTP diphosphokinase activity	MOLECULAR_FUNCTION	2.07483e-07	1.6917e-08	9	27	4233	221981
[OVER]	GO:0031901	early endosome membrane	CELLULAR_COMPONENT	2.14631e-07	1.75348e-08	8	18	4234	221990
[OVER]	GO:0006429	leucyl-tRNA aminoacylation	BIOLOGICAL_PROCESS	2.62296e-07	2.15144e-08	7	11	4235	221997
[OVER]	GO:0004823	leucine-tRNA ligase activity	MOLECULAR_FUNCTION	2.62296e-07	2.15144e-08	7	11	4235	221997
[OVER]	GO:0010020	chloroplast fission	BIOLOGICAL_PROCESS	2.71784e-07	2.23369e-08	13	80	4229	221928
[OVER]	GO:0000049	tRNA binding	MOLECULAR_FUNCTION	2.96447e-07	2.44122e-08	15	114	4227	221894
[OVER]	GO:0006431	methionyl-tRNA aminoacylation	BIOLOGICAL_PROCESS	4.01346e-07	3.35081e-08	7	12	4235	221996
[OVER]	GO:0015713	phosphoglycerate transmembrane transport	BIOLOGICAL_PROCESS	4.01346e-07	3.35081e-08	7	12	4235	221996
[OVER]	GO:0080005	photosystem stoichiometry adjustment	BIOLOGICAL_PROCESS	4.01346e-07	3.35081e-08	7	12	4235	221996
[OVER]	GO:0015120	phosphoglycerate transmembrane transporter activity	MOLECULAR_FUNCTION	4.01346e-07	3.35081e-08	7	12	4235	221996
[OVER]	GO:0004825	methionine-tRNA ligase activity	MOLECULAR_FUNCTION	4.01346e-07	3.35081e-08	7	12	4235	221996
[OVER]	GO:0015969	guanosine tetraphosphate metabolic process	BIOLOGICAL_PROCESS	4.31865e-07	3.61976e-08	9	30	4233	221978
[OVER]	GO:0071461	cellular response to redox state	BIOLOGICAL_PROCESS	4.31865e-07	3.63024e-08	6	6	4236	222002
[OVER]	GO:0052663	antheraxanthin epoxidase activity	MOLECULAR_FUNCTION	4.31865e-07	3.61976e-08	9	30	4233	221978
[OVER]	GO:0046428	1,4-dihydroxy-2-naphthoate octaprenyltransferase activity	MOLECULAR_FUNCTION	4.31865e-07	3.63024e-08	6	6	4236	222002
[OVER]	GO:0004789	thiamine-phosphate diphosphorylase activity	MOLECULAR_FUNCTION	4.31865e-07	3.63024e-08	6	6	4236	222002
[OVER]	GO:0047213	anthocyanidin 3-O-glucosyltransferase activity	MOLECULAR_FUNCTION	4.57042e-07	3.85631e-08	21	242	4221	221766
[OVER]	GO:0009750	response to fructose	BIOLOGICAL_PROCESS	4.826e-07	4.08031e-08	30	470	4212	221538
[OVER]	GO:0080085	signal recognition particle, chloroplast targeting	CELLULAR_COMPONENT	5.54762e-07	4.70398e-08	5	2	4237	222006
[OVER]	GO:0005789	endoplasmic reticulum membrane	CELLULAR_COMPONENT	5.87349e-07	4.98507e-08	55	1246	4187	220762
[OVER]	GO:0042132	fructose 1,6-bisphosphate 1-phosphatase activity	MOLECULAR_FUNCTION	6.79699e-07	5.7855e-08	9	32	4233	221976
[OVER]	GO:0008447	L-ascorbate oxidase activity	MOLECULAR_FUNCTION	7.06363e-07	6.02397e-08	12	72	4230	221936
[OVER]	GO:0016719	carotene 7,8-desaturase activity	MOLECULAR_FUNCTION	7.19141e-07	6.14465e-08	8	22	4234	221986
[OVER]	GO:0089722	phosphoenolpyruvate transmembrane transport	BIOLOGICAL_PROCESS	7.71984e-07	6.63389e-08	6	7	4236	222001
[OVER]	GO:0015121	phosphoenolpyruvate:phosphate antiporter activity	MOLECULAR_FUNCTION	7.71984e-07	6.63389e-08	6	7	4236	222001
[OVER]	GO:0043023	ribosomal large subunit binding	MOLECULAR_FUNCTION	7.71984e-07	6.63389e-08	6	7	4236	222001
[OVER]	GO:0052662	zeaxanthin epoxidase activity	MOLECULAR_FUNCTION	8.4093e-07	7.24007e-08	9	33	4233	221975
[OVER]	GO:0009540	zeaxanthin epoxidase [overall] activity	MOLECULAR_FUNCTION	8.4093e-07	7.24007e-08	9	33	4233	221975
[OVER]	GO:0042803	protein homodimerization activity	MOLECULAR_FUNCTION	9.37216e-07	8.08432e-08	31	514	4211	221494
[OVER]	GO:0009306	protein secretion	BIOLOGICAL_PROCESS	1.02623e-06	8.89392e-08	15	127	4227	221881
[OVER]	GO:0071483	cellular response to blue light	BIOLOGICAL_PROCESS	1.17401e-06	1.02182e-07	12	76	4230	221932
[OVER]	GO:0006002	fructose 6-phosphate metabolic process	BIOLOGICAL_PROCESS	1.17871e-06	1.0273e-07	10	47	4232	221961
[OVER]	GO:0045727	positive regulation of translation	BIOLOGICAL_PROCESS	1.20853e-06	1.05526e-07	19	212	4223	221796
[OVER]	GO:0010731	protein glutathionylation	BIOLOGICAL_PROCESS	1.23282e-06	1.07949e-07	7	15	4235	221993
[OVER]	GO:0006426	glycyl-tRNA aminoacylation	BIOLOGICAL_PROCESS	1.30219e-06	1.14234e-07	6	8	4236	222000
[OVER]	GO:0004820	glycine-tRNA ligase activity	MOLECULAR_FUNCTION	1.30219e-06	1.14234e-07	6	8	4236	222000
[OVER]	GO:1902171	regulation of tocopherol cyclase activity	BIOLOGICAL_PROCESS	1.40279e-06	1.23403e-07	4	0	4238	222008
[OVER]	GO:0018489	vanillate monooxygenase activity	MOLECULAR_FUNCTION	1.40279e-06	1.23403e-07	4	0	4238	222008
[OVER]	GO:0006857	oligopeptide transport	BIOLOGICAL_PROCESS	1.42148e-06	1.25162e-07	24	335	4218	221673
[OVER]	GO:0009734	auxin-activated signaling pathway	BIOLOGICAL_PROCESS	1.84253e-06	1.63587e-07	29	475	4213	221533
[OVER]	GO:0010196	nonphotochemical quenching	BIOLOGICAL_PROCESS	1.87989e-06	1.6721e-07	9	37	4233	221971
[OVER]	GO:0080022	primary root development	BIOLOGICAL_PROCESS	2.26754e-06	2.03353e-07	9	38	4233	221970
[OVER]	GO:0070330	aromatase activity	MOLECULAR_FUNCTION	2.50702e-06	2.25238e-07	14	118	4228	221890
[OVER]	GO:0004032	alditol:NADP+ 1-oxidoreductase activity	MOLECULAR_FUNCTION	2.52549e-06	2.27309e-07	8	27	4234	221981
[OVER]	GO:0010007	magnesium chelatase complex	CELLULAR_COMPONENT	2.52549e-06	2.27309e-07	8	27	4234	221981
[OVER]	GO:0046274	lignin catabolic process	BIOLOGICAL_PROCESS	2.98625e-06	2.70725e-07	12	84	4230	221924
[OVER]	GO:0006434	seryl-tRNA aminoacylation	BIOLOGICAL_PROCESS	2.99809e-06	2.73508e-07	5	4	4237	222004
[OVER]	GO:0042572	retinol metabolic process	BIOLOGICAL_PROCESS	2.99809e-06	2.73508e-07	5	4	4237	222004
[OVER]	GO:0004828	serine-tRNA ligase activity	MOLECULAR_FUNCTION	2.99809e-06	2.73508e-07	5	4	4237	222004
[OVER]	GO:0051786	all-trans-retinol 13,14-reductase activity	MOLECULAR_FUNCTION	2.99809e-06	2.73508e-07	5	4	4237	222004
[OVER]	GO:0052728	capsorubin synthase activity	MOLECULAR_FUNCTION	2.99809e-06	2.73508e-07	5	4	4237	222004
[OVER]	GO:0052727	capsanthin synthase activity	MOLECULAR_FUNCTION	2.99809e-06	2.73508e-07	5	4	4237	222004
[OVER]	GO:0008679	2-hydroxy-3-oxopropionate reductase activity	MOLECULAR_FUNCTION	2.99809e-06	2.73508e-07	5	4	4237	222004
[OVER]	GO:0010277	chlorophyllide a oxygenase [overall] activity	MOLECULAR_FUNCTION	3.14218e-06	2.87421e-07	8	28	4234	221980
[OVER]	GO:0031304	intrinsic component of mitochondrial inner membrane	CELLULAR_COMPONENT	3.14218e-06	2.87421e-07	8	28	4234	221980
[OVER]	GO:0008878	glucose-1-phosphate adenylyltransferase activity	MOLECULAR_FUNCTION	3.16342e-06	2.89622e-07	7	18	4235	221990
[OVER]	GO:0006427	histidyl-tRNA aminoacylation	BIOLOGICAL_PROCESS	3.21309e-06	2.94954e-07	6	10	4236	221998
[OVER]	GO:0004821	histidine-tRNA ligase activity	MOLECULAR_FUNCTION	3.21309e-06	2.94954e-07	6	10	4236	221998
[OVER]	GO:0009625	response to insect	BIOLOGICAL_PROCESS	3.47216e-06	3.19868e-07	10	54	4232	221954
[OVER]	GO:0006569	tryptophan catabolic process	BIOLOGICAL_PROCESS	3.65764e-06	3.37849e-07	19	230	4223	221778
[OVER]	GO:0008137	NADH dehydrogenase (ubiquinone) activity	MOLECULAR_FUNCTION	3.67378e-06	3.40199e-07	16	163	4226	221845
[OVER]	GO:0052716	hydroquinone:oxygen oxidoreductase activity	MOLECULAR_FUNCTION	4.09322e-06	3.80415e-07	12	87	4230	221921
[OVER]	GO:0019430	removal of superoxide radicals	BIOLOGICAL_PROCESS	4.18948e-06	3.90385e-07	14	124	4228	221884
[OVER]	GO:0050645	limonoid glucosyltransferase activity	MOLECULAR_FUNCTION	4.18948e-06	3.89864e-07	7	19	4235	221989
[OVER]	GO:0004605	phosphatidate cytidylyltransferase activity	MOLECULAR_FUNCTION	5.50328e-06	5.1774e-07	7	20	4235	221988
[OVER]	GO:0006435	threonyl-tRNA aminoacylation	BIOLOGICAL_PROCESS	5.70414e-06	5.38494e-07	5	5	4237	222003
[OVER]	GO:0004829	threonine-tRNA ligase activity	MOLECULAR_FUNCTION	5.70414e-06	5.38494e-07	5	5	4237	222003
[OVER]	GO:0000774	adenyl-nucleotide exchange factor activity	MOLECULAR_FUNCTION	5.70414e-06	5.38494e-07	5	5	4237	222003
[OVER]	GO:0009538	photosystem I reaction center	CELLULAR_COMPONENT	6.29889e-06	5.97719e-07	9	44	4233	221964
[OVER]	GO:0010323	negative regulation of isopentenyl diphosphate biosynthetic process, methylerythritol 4-phosphate pathway	BIOLOGICAL_PROCESS	6.37741e-06	6.07768e-07	4	1	4238	222007
[OVER]	GO:0002949	tRNA threonylcarbamoyladenosine modification	BIOLOGICAL_PROCESS	6.37741e-06	6.07768e-07	4	1	4238	222007
[OVER]	GO:0008305	integrin complex	CELLULAR_COMPONENT	6.37741e-06	6.07768e-07	4	1	4238	222007
[OVER]	GO:0070084	protein initiator methionine removal	BIOLOGICAL_PROCESS	7.08928e-06	6.79074e-07	7	21	4235	221987
[OVER]	GO:0019287	isopentenyl diphosphate biosynthetic process, mevalonate pathway	BIOLOGICAL_PROCESS	7.08928e-06	6.79074e-07	7	21	4235	221987
[OVER]	GO:0010189	vitamin E biosynthetic process	BIOLOGICAL_PROCESS	7.10371e-06	6.83349e-07	8	32	4234	221976
[OVER]	GO:0000287	magnesium ion binding	MOLECULAR_FUNCTION	7.26775e-06	6.99722e-07	34	663	4208	221345
[OVER]	GO:0015450	P-P-bond-hydrolysis-driven protein transmembrane transporter activity	MOLECULAR_FUNCTION	7.79566e-06	7.52452e-07	11	76	4231	221932
[OVER]	GO:0016851	magnesium chelatase activity	MOLECULAR_FUNCTION	8.60714e-06	8.34984e-07	8	33	4234	221975
[OVER]	GO:0004575	sucrose alpha-glucosidase activity	MOLECULAR_FUNCTION	8.60714e-06	8.34984e-07	8	33	4234	221975
[OVER]	GO:0016126	sterol biosynthetic process	BIOLOGICAL_PROCESS	8.61308e-06	8.36262e-07	29	517	4213	221491
[OVER]	GO:0002237	response to molecule of bacterial origin	BIOLOGICAL_PROCESS	8.97992e-06	8.72611e-07	16	176	4226	221832
[OVER]	GO:0019632	shikimate metabolic process	BIOLOGICAL_PROCESS	9.0466e-06	8.80564e-07	7	22	4235	221986
[OVER]	GO:0070006	metalloaminopeptidase activity	MOLECULAR_FUNCTION	9.0466e-06	8.80564e-07	7	22	4235	221986
[OVER]	GO:0000103	sulfate assimilation	BIOLOGICAL_PROCESS	9.72512e-06	9.48193e-07	11	78	4231	221930
[OVER]	GO:0006816	calcium ion transport	BIOLOGICAL_PROCESS	1.04055e-05	1.02131e-06	32	613	4210	221395
[OVER]	GO:0051213	dioxygenase activity	MOLECULAR_FUNCTION	1.14682e-05	1.12748e-06	38	802	4204	221206
[OVER]	GO:0009555	pollen development	BIOLOGICAL_PROCESS	1.21429e-05	1.19678e-06	46	1070	4196	220938
[OVER]	GO:0042644	chloroplast nucleoid	CELLULAR_COMPONENT	1.48875e-05	1.47335e-06	8	36	4234	221972
[OVER]	GO:0010028	xanthophyll cycle	BIOLOGICAL_PROCESS	1.65591e-05	1.64013e-06	5	7	4237	222001
[OVER]	GO:0002229	defense response to oomycetes	BIOLOGICAL_PROCESS	1.78339e-05	1.77221e-06	9	51	4233	221957
[OVER]	GO:0009868	jasmonic acid and ethylene-dependent systemic resistance, jasmonic acid mediated signaling pathway	BIOLOGICAL_PROCESS	1.80143e-05	1.796e-06	4	2	4238	222006
[OVER]	GO:0008834	di-trans,poly-cis-decaprenylcistransferase activity	MOLECULAR_FUNCTION	1.80143e-05	1.796e-06	4	2	4238	222006
[OVER]	GO:0042282	hydroxymethylglutaryl-CoA reductase activity	MOLECULAR_FUNCTION	1.80143e-05	1.796e-06	4	2	4238	222006
[OVER]	GO:0009575	chromoplast stroma	CELLULAR_COMPONENT	1.80143e-05	1.796e-06	4	2	4238	222006
[OVER]	GO:0030093	chloroplast photosystem I	CELLULAR_COMPONENT	1.84654e-05	1.84398e-06	6	15	4236	221993
[OVER]	GO:0006623	protein targeting to vacuole	BIOLOGICAL_PROCESS	1.8914e-05	1.89032e-06	28	510	4214	221498
[OVER]	GO:0006567	threonine catabolic process	BIOLOGICAL_PROCESS	2.30822e-05	2.32759e-06	13	125	4229	221883
[OVER]	GO:0019388	galactose catabolic process	BIOLOGICAL_PROCESS	2.59563e-05	2.62375e-06	5	8	4237	222000
[OVER]	GO:0019464	glycine decarboxylation via glycine cleavage system	BIOLOGICAL_PROCESS	2.75719e-05	2.79604e-06	7	27	4235	221981
[OVER]	GO:0003989	acetyl-CoA carboxylase activity	MOLECULAR_FUNCTION	2.75719e-05	2.79604e-06	7	27	4235	221981
[OVER]	GO:0015288	porin activity	MOLECULAR_FUNCTION	2.75719e-05	2.79604e-06	7	27	4235	221981
[OVER]	GO:0004579	dolichyl-diphosphooligosaccharide-protein glycotransferase activity	MOLECULAR_FUNCTION	2.88956e-05	2.93498e-06	8	40	4234	221968
[OVER]	GO:0005978	glycogen biosynthetic process	BIOLOGICAL_PROCESS	2.91859e-05	2.9716e-06	10	71	4232	221937
[OVER]	GO:0008270	zinc ion binding	MOLECULAR_FUNCTION	2.9844e-05	3.04104e-06	168	6023	4074	215985
[OVER]	GO:0009228	thiamine biosynthetic process	BIOLOGICAL_PROCESS	3.02442e-05	3.08675e-06	9	55	4233	221953
[OVER]	GO:0006094	gluconeogenesis	BIOLOGICAL_PROCESS	3.11109e-05	3.17774e-06	34	702	4208	221306
[OVER]	GO:0019243	methylglyoxal catabolic process to D-lactate via S-lactoyl-glutathione	BIOLOGICAL_PROCESS	3.56711e-05	3.66096e-06	26	469	4216	221539
[OVER]	GO:0006486	protein glycosylation	BIOLOGICAL_PROCESS	3.77125e-05	3.88583e-06	48	1183	4194	220825
[OVER]	GO:0045037	protein import into chloroplast stroma	BIOLOGICAL_PROCESS	3.88697e-05	4.01139e-06	9	57	4233	221951
[OVER]	GO:0006005	L-fucose biosynthetic process	BIOLOGICAL_PROCESS	3.97481e-05	4.12794e-06	4	3	4238	222005
[OVER]	GO:0004655	porphobilinogen synthase activity	MOLECULAR_FUNCTION	3.97481e-05	4.12794e-06	4	3	4238	222005
[OVER]	GO:0004654	polyribonucleotide nucleotidyltransferase activity	MOLECULAR_FUNCTION	3.97481e-05	4.12794e-06	4	3	4238	222005
[OVER]	GO:0043864	indoleacetamide hydrolase activity	MOLECULAR_FUNCTION	3.97481e-05	4.12794e-06	4	3	4238	222005
[OVER]	GO:0009220	pyrimidine ribonucleotide biosynthetic process	BIOLOGICAL_PROCESS	4.13924e-05	4.3122e-06	30	596	4212	221412
[OVER]	GO:0018786	haloalkane dehalogenase activity	MOLECULAR_FUNCTION	4.17693e-05	4.35827e-06	6	18	4236	221990
[OVER]	GO:0019408	dolichol biosynthetic process	BIOLOGICAL_PROCESS	4.41937e-05	4.62563e-06	10	75	4232	221933
[OVER]	GO:0016049	cell growth	BIOLOGICAL_PROCESS	4.43398e-05	4.64453e-06	70	2013	4172	219995
[OVER]	GO:0043621	protein self-association	MOLECULAR_FUNCTION	5.13281e-05	5.39746e-06	11	95	4231	221913
[OVER]	GO:0010078	maintenance of root meristem identity	BIOLOGICAL_PROCESS	5.34159e-05	5.64311e-06	6	19	4236	221989
[OVER]	GO:0006424	glutamyl-tRNA aminoacylation	BIOLOGICAL_PROCESS	5.34159e-05	5.64311e-06	6	19	4236	221989
[OVER]	GO:0010380	regulation of chlorophyll biosynthetic process	BIOLOGICAL_PROCESS	5.50665e-05	5.83991e-06	9	60	4233	221948
[OVER]	GO:0046608	carotenoid isomerase activity	MOLECULAR_FUNCTION	5.58176e-05	5.93321e-06	5	10	4237	221998
[OVER]	GO:0050412	cinnamate beta-D-glucosyltransferase activity	MOLECULAR_FUNCTION	5.58176e-05	5.93321e-06	5	10	4237	221998
[OVER]	GO:0019031	viral envelope	CELLULAR_COMPONENT	5.76606e-05	6.1432e-06	7	31	4235	221977
[OVER]	GO:0045022	early endosome to late endosome transport	BIOLOGICAL_PROCESS	6.11191e-05	6.58635e-06	3	0	4239	222008
[OVER]	GO:0090042	tubulin deacetylation	BIOLOGICAL_PROCESS	6.11191e-05	6.58635e-06	3	0	4239	222008
[OVER]	GO:0071836	nectar secretion	BIOLOGICAL_PROCESS	6.11191e-05	6.58635e-06	3	0	4239	222008
[OVER]	GO:0010581	regulation of starch biosynthetic process	BIOLOGICAL_PROCESS	6.11191e-05	6.58635e-06	3	0	4239	222008
[OVER]	GO:0050313	sulfur dioxygenase activity	MOLECULAR_FUNCTION	6.11191e-05	6.58635e-06	3	0	4239	222008
[OVER]	GO:0047951	glutathione thiolesterase activity	MOLECULAR_FUNCTION	6.11191e-05	6.58635e-06	3	0	4239	222008
[OVER]	GO:0051721	protein phosphatase 2A binding	MOLECULAR_FUNCTION	6.11191e-05	6.58635e-06	3	0	4239	222008
[OVER]	GO:0042903	tubulin deacetylase activity	MOLECULAR_FUNCTION	6.11191e-05	6.58635e-06	3	0	4239	222008
[OVER]	GO:0043014	alpha-tubulin binding	MOLECULAR_FUNCTION	6.11191e-05	6.58635e-06	3	0	4239	222008
[OVER]	GO:0009344	nitrite reductase complex [NAD(P)H]	CELLULAR_COMPONENT	6.11191e-05	6.58635e-06	3	0	4239	222008
[OVER]	GO:0010009	cytoplasmic side of endosome membrane	CELLULAR_COMPONENT	6.11191e-05	6.58635e-06	3	0	4239	222008
[OVER]	GO:0060560	developmental growth involved in morphogenesis	BIOLOGICAL_PROCESS	6.35085e-05	6.85418e-06	57	1541	4185	220467
[OVER]	GO:0004311	farnesyltranstransferase activity	MOLECULAR_FUNCTION	6.7938e-05	7.36543e-06	7	32	4235	221976
[OVER]	GO:0000041	transition metal ion transport	BIOLOGICAL_PROCESS	7.07653e-05	7.67772e-06	36	798	4206	221210
[OVER]	GO:0007160	cell-matrix adhesion	BIOLOGICAL_PROCESS	7.462e-05	8.13241e-06	4	4	4238	222004
[OVER]	GO:0004707	MAP kinase activity	MOLECULAR_FUNCTION	7.72958e-05	8.43032e-06	8	47	4234	221961
[OVER]	GO:0030388	fructose 1,6-bisphosphate metabolic process	BIOLOGICAL_PROCESS	7.78403e-05	8.49605e-06	5	11	4237	221997
[OVER]	GO:0010311	lateral root formation	BIOLOGICAL_PROCESS	8.231e-05	8.99731e-06	13	143	4229	221865
[OVER]	GO:0031359	integral component of chloroplast outer membrane	CELLULAR_COMPONENT	8.33098e-05	9.13375e-06	6	21	4236	221987
[OVER]	GO:0004089	carbonate dehydratase activity	MOLECULAR_FUNCTION	8.6285e-05	9.46696e-06	10	82	4232	221926
[OVER]	GO:0043069	negative regulation of programmed cell death	BIOLOGICAL_PROCESS	8.74191e-05	9.59851e-06	28	559	4214	221449
[OVER]	GO:0016174	NAD(P)H oxidase H2O2-forming activity	MOLECULAR_FUNCTION	8.80364e-05	9.67346e-06	8	48	4234	221960
[OVER]	GO:0004784	superoxide dismutase activity	MOLECULAR_FUNCTION	9.83889e-05	1.08991e-05	11	103	4231	221905
[OVER]	GO:0033926	glycopeptide alpha-N-acetylgalactosaminidase activity	MOLECULAR_FUNCTION	0.000102965	1.14396e-05	6	22	4236	221986
[OVER]	GO:0051920	peroxiredoxin activity	MOLECULAR_FUNCTION	0.000105158	1.17023e-05	9	66	4233	221942
[OVER]	GO:0032880	regulation of protein localization	BIOLOGICAL_PROCESS	0.000105622	1.17692e-05	16	219	4226	221789
[OVER]	GO:0016688	L-ascorbate peroxidase activity	MOLECULAR_FUNCTION	0.000110065	1.23001e-05	7	35	4235	221973
[OVER]	GO:0003747	translation release factor activity	MOLECULAR_FUNCTION	0.000112509	1.26099e-05	10	85	4232	221923
[OVER]	GO:0017025	TBP-class protein binding	MOLECULAR_FUNCTION	0.000112581	1.26272e-05	8	50	4234	221958
[OVER]	GO:0004345	glucose-6-phosphate dehydrogenase activity	MOLECULAR_FUNCTION	0.000126368	1.41941e-05	6	23	4236	221985
[OVER]	GO:0005351	carbohydrate:proton symporter activity	MOLECULAR_FUNCTION	0.000126504	1.42301e-05	21	359	4221	221649
[OVER]	GO:1901259	chloroplast rRNA processing	BIOLOGICAL_PROCESS	0.00012745	1.44195e-05	4	5	4238	222003
[OVER]	GO:0007112	male meiosis cytokinesis	BIOLOGICAL_PROCESS	0.00012745	1.44195e-05	4	5	4238	222003
[OVER]	GO:0017186	peptidyl-pyroglutamic acid biosynthetic process, using glutaminyl-peptide cyclotransferase	BIOLOGICAL_PROCESS	0.00012745	1.44195e-05	4	5	4238	222003
[OVER]	GO:0050577	GDP-L-fucose synthase activity	MOLECULAR_FUNCTION	0.00012745	1.44195e-05	4	5	4238	222003
[OVER]	GO:0016603	glutaminyl-peptide cyclotransferase activity	MOLECULAR_FUNCTION	0.00012745	1.44195e-05	4	5	4238	222003
[OVER]	GO:0070125	mitochondrial translational elongation	BIOLOGICAL_PROCESS	0.000142455	1.61519e-05	5	13	4237	221995
[OVER]	GO:0042538	hyperosmotic salinity response	BIOLOGICAL_PROCESS	0.000155932	1.77308e-05	22	394	4220	221614
[OVER]	GO:0009504	cell plate	CELLULAR_COMPONENT	0.000161226	1.83459e-05	12	131	4230	221877
[OVER]	GO:0009506	plasmodesma	CELLULAR_COMPONENT	0.000185909	2.12e-05	101	3360	4141	218648
[OVER]	GO:0046930	pore complex	CELLULAR_COMPONENT	0.000186572	2.1306e-05	6	25	4236	221983
[OVER]	GO:0080167	response to karrikin	BIOLOGICAL_PROCESS	0.000196527	2.25069e-05	21	371	4221	221637
[OVER]	GO:0006438	valyl-tRNA aminoacylation	BIOLOGICAL_PROCESS	0.000204965	2.36735e-05	4	6	4238	222002
[OVER]	GO:0051501	diterpene phytoalexin metabolic process	BIOLOGICAL_PROCESS	0.000204965	2.36735e-05	4	6	4238	222002
[OVER]	GO:0008825	cyclopropane-fatty-acyl-phospholipid synthase activity	MOLECULAR_FUNCTION	0.000204965	2.36735e-05	4	6	4238	222002
[OVER]	GO:0004832	valine-tRNA ligase activity	MOLECULAR_FUNCTION	0.000204965	2.36735e-05	4	6	4238	222002
[OVER]	GO:0046422	violaxanthin de-epoxidase activity	MOLECULAR_FUNCTION	0.000204965	2.36735e-05	4	6	4238	222002
[OVER]	GO:0031361	integral component of thylakoid membrane	CELLULAR_COMPONENT	0.000204965	2.36735e-05	4	6	4238	222002
[OVER]	GO:0042732	D-xylose metabolic process	BIOLOGICAL_PROCESS	0.000208983	2.41716e-05	12	135	4230	221873
[OVER]	GO:0006465	signal peptide processing	BIOLOGICAL_PROCESS	0.000222953	2.58056e-05	6	26	4236	221982
[OVER]	GO:1900160	plastid DNA packaging	BIOLOGICAL_PROCESS	0.000223161	2.59752e-05	3	1	4239	222007
[OVER]	GO:0031930	mitochondria-nucleus signaling pathway	BIOLOGICAL_PROCESS	0.000223161	2.59752e-05	3	1	4239	222007
[OVER]	GO:0008801	beta-phosphoglucomutase activity	MOLECULAR_FUNCTION	0.000223161	2.59752e-05	3	1	4239	222007
[OVER]	GO:0004846	urate oxidase activity	MOLECULAR_FUNCTION	0.000223161	2.59752e-05	3	1	4239	222007
[OVER]	GO:0046905	phytoene synthase activity	MOLECULAR_FUNCTION	0.000223161	2.59752e-05	3	1	4239	222007
[OVER]	GO:0016767	geranylgeranyl-diphosphate geranylgeranyltransferase activity	MOLECULAR_FUNCTION	0.000223161	2.59752e-05	3	1	4239	222007
[OVER]	GO:0005770	late endosome	CELLULAR_COMPONENT	0.000232363	2.7122e-05	13	160	4229	221848
[OVER]	GO:0009718	anthocyanin-containing compound biosynthetic process	BIOLOGICAL_PROCESS	0.000236679	2.7645e-05	12	137	4230	221871
[OVER]	GO:0030968	endoplasmic reticulum unfolded protein response	BIOLOGICAL_PROCESS	0.000238045	2.7824e-05	25	499	4217	221509
[OVER]	GO:0006968	cellular defense response	BIOLOGICAL_PROCESS	0.000242186	2.83277e-05	5	15	4237	221993
[OVER]	GO:0008138	protein tyrosine/serine/threonine phosphatase activity	MOLECULAR_FUNCTION	0.000259359	3.03997e-05	10	95	4232	221913
[OVER]	GO:0009640	photomorphogenesis	BIOLOGICAL_PROCESS	0.00026437	3.10086e-05	37	900	4205	221108
[OVER]	GO:0050833	pyruvate transmembrane transporter activity	MOLECULAR_FUNCTION	0.000264442	3.10387e-05	6	27	4236	221981
[OVER]	GO:0043086	negative regulation of catalytic activity	BIOLOGICAL_PROCESS	0.000307024	3.61367e-05	21	384	4221	221624
[OVER]	GO:0060964	regulation of gene silencing by miRNA	BIOLOGICAL_PROCESS	0.00030985	3.66459e-05	4	7	4238	222001
[OVER]	GO:0030505	inorganic diphosphate transport	BIOLOGICAL_PROCESS	0.00030985	3.66459e-05	4	7	4238	222001
[OVER]	GO:0030504	inorganic diphosphate transmembrane transporter activity	MOLECULAR_FUNCTION	0.00030985	3.66459e-05	4	7	4238	222001
[OVER]	GO:0031409	pigment binding	MOLECULAR_FUNCTION	0.00030985	3.66459e-05	4	7	4238	222001
[OVER]	GO:0042545	cell wall modification	BIOLOGICAL_PROCESS	0.000310018	3.66928e-05	36	870	4206	221138
[OVER]	GO:0000917	division septum assembly	BIOLOGICAL_PROCESS	0.000312749	3.70906e-05	6	28	4236	221980
[OVER]	GO:0004857	enzyme inhibitor activity	MOLECULAR_FUNCTION	0.000339818	4.0384e-05	16	244	4226	221764
[OVER]	GO:0034052	positive regulation of plant-type hypersensitive response	BIOLOGICAL_PROCESS	0.000389754	4.66359e-05	5	17	4237	221991
[OVER]	GO:0010039	response to iron ion	BIOLOGICAL_PROCESS	0.000410287	4.9193e-05	12	146	4230	221862
[OVER]	GO:0006499	N-terminal protein myristoylation	BIOLOGICAL_PROCESS	0.000435385	5.23441e-05	24	488	4218	221520
[OVER]	GO:0016041	glutamate synthase (ferredoxin) activity	MOLECULAR_FUNCTION	0.000448876	5.41488e-05	4	8	4238	222000
[OVER]	GO:0004853	uroporphyrinogen decarboxylase activity	MOLECULAR_FUNCTION	0.000448876	5.41488e-05	4	8	4238	222000
[OVER]	GO:0008964	phosphoenolpyruvate carboxylase activity	MOLECULAR_FUNCTION	0.000448876	5.41488e-05	4	8	4238	222000
[OVER]	GO:0000408	EKC/KEOPS complex	CELLULAR_COMPONENT	0.000448876	5.41488e-05	4	8	4238	222000
[OVER]	GO:0019825	oxygen binding	MOLECULAR_FUNCTION	0.000479177	5.78822e-05	16	252	4226	221756
[OVER]	GO:0033356	UDP-L-arabinose metabolic process	BIOLOGICAL_PROCESS	0.000484699	5.86676e-05	5	18	4237	221990
[OVER]	GO:0019605	butyrate metabolic process	BIOLOGICAL_PROCESS	0.000484699	5.86676e-05	5	18	4237	221990
[OVER]	GO:0008615	pyridoxine biosynthetic process	BIOLOGICAL_PROCESS	0.000503162	6.11073e-05	6	31	4236	221977
[OVER]	GO:0006430	lysyl-tRNA aminoacylation	BIOLOGICAL_PROCESS	0.000524034	6.40263e-05	3	2	4239	222006
[OVER]	GO:0019424	sulfide oxidation, using siroheme sulfite reductase	BIOLOGICAL_PROCESS	0.000524034	6.40263e-05	3	2	4239	222006
[OVER]	GO:0050311	sulfite reductase (ferredoxin) activity	MOLECULAR_FUNCTION	0.000524034	6.40263e-05	3	2	4239	222006
[OVER]	GO:0004824	lysine-tRNA ligase activity	MOLECULAR_FUNCTION	0.000524034	6.40263e-05	3	2	4239	222006
[OVER]	GO:0103012	ferredoxin-thioredoxin reductase activity	MOLECULAR_FUNCTION	0.000524034	6.40263e-05	3	2	4239	222006
[OVER]	GO:0045174	glutathione dehydrogenase (ascorbate) activity	MOLECULAR_FUNCTION	0.000524034	6.40263e-05	3	2	4239	222006
[OVER]	GO:0009782	photosystem I antenna complex	CELLULAR_COMPONENT	0.000524034	6.40263e-05	3	2	4239	222006
[OVER]	GO:0004364	glutathione transferase activity	MOLECULAR_FUNCTION	0.000529702	6.47619e-05	11	127	4231	221881
[OVER]	GO:0009749	response to glucose	BIOLOGICAL_PROCESS	0.00055984	6.85835e-05	17	284	4225	221724
[OVER]	GO:0042372	phylloquinone biosynthetic process	BIOLOGICAL_PROCESS	0.000563114	6.90763e-05	8	65	4234	221943
[OVER]	GO:0042908	xenobiotic transport	BIOLOGICAL_PROCESS	0.000581006	7.1395e-05	10	106	4232	221902
[OVER]	GO:0008184	glycogen phosphorylase activity	MOLECULAR_FUNCTION	0.000581006	7.14131e-05	6	32	4236	221976
[OVER]	GO:0019255	glucose 1-phosphate metabolic process	BIOLOGICAL_PROCESS	0.000592019	7.29595e-05	5	19	4237	221989
[OVER]	GO:0030151	molybdenum ion binding	MOLECULAR_FUNCTION	0.000606376	7.48276e-05	7	48	4235	221960
[OVER]	GO:0034484	raffinose catabolic process	BIOLOGICAL_PROCESS	0.000623964	7.70489e-05	4	9	4238	221999
[OVER]	GO:0072509	divalent inorganic cation transmembrane transporter activity	MOLECULAR_FUNCTION	0.0006336	7.82905e-05	20	376	4222	221632
[OVER]	GO:0000338	protein deneddylation	BIOLOGICAL_PROCESS	0.000639671	7.90926e-05	21	407	4221	221601
[OVER]	GO:0003960	NADPH:quinone reductase activity	MOLECULAR_FUNCTION	0.000669537	8.30581e-05	6	33	4236	221975
[OVER]	GO:0048829	root cap development	BIOLOGICAL_PROCESS	0.000677331	8.41354e-05	7	49	4235	221959
[OVER]	GO:0010224	response to UV-B	BIOLOGICAL_PROCESS	0.000701007	8.71905e-05	17	290	4225	221718
[OVER]	GO:0009590	detection of gravity	BIOLOGICAL_PROCESS	0.00071907	8.97886e-05	5	20	4237	221988
[OVER]	GO:0032365	intracellular lipid transport	BIOLOGICAL_PROCESS	0.00071907	8.97886e-05	5	20	4237	221988
[OVER]	GO:0044375	regulation of peroxisome size	BIOLOGICAL_PROCESS	0.00071907	8.97886e-05	5	20	4237	221988
[OVER]	GO:0010119	regulation of stomatal movement	BIOLOGICAL_PROCESS	0.000838509	0.000104976	15	238	4227	221770
[OVER]	GO:0010270	photosystem II oxygen evolving complex assembly	BIOLOGICAL_PROCESS	0.000844928	0.000106261	4	10	4238	221998
[OVER]	GO:0097054	L-glutamate biosynthetic process	BIOLOGICAL_PROCESS	0.000844928	0.000106261	4	10	4238	221998
[OVER]	GO:0005987	sucrose catabolic process	BIOLOGICAL_PROCESS	0.000844928	0.000106261	4	10	4238	221998
[OVER]	GO:0005363	maltose transmembrane transporter activity	MOLECULAR_FUNCTION	0.000844928	0.000106261	4	10	4238	221998
[OVER]	GO:0005483	soluble NSF attachment protein activity	MOLECULAR_FUNCTION	0.000844928	0.000106261	4	10	4238	221998
[OVER]	GO:0004792	thiosulfate sulfurtransferase activity	MOLECULAR_FUNCTION	0.000844928	0.000106261	4	10	4238	221998
[OVER]	GO:0009317	acetyl-CoA carboxylase complex	CELLULAR_COMPONENT	0.000869705	0.000109448	5	21	4237	221987
[OVER]	GO:0045995	regulation of embryonic development	BIOLOGICAL_PROCESS	0.000880393	0.000110865	6	35	4236	221973
[OVER]	GO:0035281	pre-miRNA export from nucleus	BIOLOGICAL_PROCESS	0.000989817	0.000126257	3	3	4239	222005
[OVER]	GO:0006543	glutamine catabolic process	BIOLOGICAL_PROCESS	0.000989817	0.000126257	3	3	4239	222005
[OVER]	GO:0019358	nicotinate nucleotide salvage	BIOLOGICAL_PROCESS	0.000989817	0.000126257	3	3	4239	222005
[OVER]	GO:0016002	sulfite reductase activity	MOLECULAR_FUNCTION	0.000989817	0.000126257	3	3	4239	222005
[OVER]	GO:0047936	glucose 1-dehydrogenase [NAD(P)] activity	MOLECULAR_FUNCTION	0.000989817	0.000126257	3	3	4239	222005
[OVER]	GO:0004516	nicotinate phosphoribosyltransferase activity	MOLECULAR_FUNCTION	0.000989817	0.000126257	3	3	4239	222005
[OVER]	GO:0042389	omega-3 fatty acid desaturase activity	MOLECULAR_FUNCTION	0.000989817	0.000126257	3	3	4239	222005
[OVER]	GO:0010357	homogentisate solanesyltransferase activity	MOLECULAR_FUNCTION	0.000989817	0.000126257	3	3	4239	222005
[OVER]	GO:0010356	homogentisate geranylgeranyltransferase activity	MOLECULAR_FUNCTION	0.000989817	0.000126257	3	3	4239	222005
[OVER]	GO:0010355	homogentisate farnesyltransferase activity	MOLECULAR_FUNCTION	0.000989817	0.000126257	3	3	4239	222005
[OVER]	GO:0004359	glutaminase activity	MOLECULAR_FUNCTION	0.000989817	0.000126257	3	3	4239	222005
[OVER]	GO:0038198	auxin receptor activity	MOLECULAR_FUNCTION	0.000989817	0.000126257	3	3	4239	222005
[OVER]	GO:0047083	5-O-(4-coumaroyl)-D-quinate 3'-monooxygenase activity	MOLECULAR_FUNCTION	0.000989817	0.000126257	3	3	4239	222005
[OVER]	GO:0004750	ribulose-phosphate 3-epimerase activity	MOLECULAR_FUNCTION	0.000989817	0.000126257	3	3	4239	222005
[OVER]	GO:1903825	organic acid transmembrane transport	BIOLOGICAL_PROCESS	0.000997245	0.000127367	21	422	4221	221586
[OVER]	GO:0005960	glycine cleavage complex	CELLULAR_COMPONENT	0.000997245	0.000127292	6	36	4236	221972
[OVER]	GO:0004683	calmodulin-dependent protein kinase activity	MOLECULAR_FUNCTION	0.00101816	0.000130204	15	243	4227	221765
[OVER]	GO:0010019	chloroplast-nucleus signaling pathway	BIOLOGICAL_PROCESS	0.00102524	0.000131276	7	53	4235	221955
[OVER]	GO:0009567	double fertilization forming a zygote and endosperm	BIOLOGICAL_PROCESS	0.00102524	0.000131276	7	53	4235	221955
[OVER]	GO:0047215	indole-3-acetate beta-glucosyltransferase activity	MOLECULAR_FUNCTION	0.00103216	0.000132247	5	22	4237	221986
[OVER]	GO:0004185	serine-type carboxypeptidase activity	MOLECULAR_FUNCTION	0.0011023	0.000141681	15	245	4227	221763
[OVER]	GO:0048283	indeterminate inflorescence morphogenesis	BIOLOGICAL_PROCESS	0.00110916	0.000142744	4	11	4238	221997
[OVER]	GO:0004420	hydroxymethylglutaryl-CoA reductase (NADPH) activity	MOLECULAR_FUNCTION	0.00110916	0.000142744	4	11	4238	221997
[OVER]	GO:1901006	ubiquinone-6 biosynthetic process	BIOLOGICAL_PROCESS	0.00122622	0.000158509	5	23	4237	221985
[OVER]	GO:0047100	glyceraldehyde-3-phosphate dehydrogenase (NADP+) (phosphorylating) activity	MOLECULAR_FUNCTION	0.00122622	0.000158509	5	23	4237	221985
[OVER]	GO:0009910	negative regulation of flower development	BIOLOGICAL_PROCESS	0.00133263	0.000172915	10	119	4232	221889
[OVER]	GO:0005802	trans-Golgi network	CELLULAR_COMPONENT	0.00134481	0.000174606	34	868	4208	221140
[OVER]	GO:0022604	regulation of cell morphogenesis	BIOLOGICAL_PROCESS	0.00141955	0.00018454	19	371	4223	221637
[OVER]	GO:0006421	asparaginyl-tRNA aminoacylation	BIOLOGICAL_PROCESS	0.00143776	0.000187494	4	12	4238	221996
[OVER]	GO:0008806	carboxymethylenebutenolidase activity	MOLECULAR_FUNCTION	0.00143776	0.000187494	4	12	4238	221996
[OVER]	GO:0003984	acetolactate synthase activity	MOLECULAR_FUNCTION	0.00143776	0.000187494	4	12	4238	221996
[OVER]	GO:0000398	mRNA splicing, via spliceosome	BIOLOGICAL_PROCESS	0.00144431	0.000188582	25	564	4217	221444
[OVER]	GO:0051538	3 iron, 4 sulfur cluster binding	MOLECULAR_FUNCTION	0.00144431	0.000188575	5	24	4237	221984
[OVER]	GO:0035725	sodium ion transmembrane transport	BIOLOGICAL_PROCESS	0.00149907	0.000196099	10	121	4232	221887
[OVER]	GO:0003913	DNA photolyase activity	MOLECULAR_FUNCTION	0.00151067	0.000197863	7	57	4235	221951
[OVER]	GO:0008171	O-methyltransferase activity	MOLECULAR_FUNCTION	0.00155012	0.000203155	13	198	4229	221810
[OVER]	GO:0009560	embryo sac egg cell differentiation	BIOLOGICAL_PROCESS	0.0015639	0.00020509	23	491	4219	221517
[OVER]	GO:0000175	3'-5'-exoribonuclease activity	MOLECULAR_FUNCTION	0.00159968	0.000209912	9	99	4233	221909
[OVER]	GO:0000913	preprophase band assembly	BIOLOGICAL_PROCESS	0.00164996	0.000217853	3	4	4239	222004
[OVER]	GO:0019628	urate catabolic process	BIOLOGICAL_PROCESS	0.00164996	0.000217853	3	4	4239	222004
[OVER]	GO:0042286	glutamate-1-semialdehyde 2,1-aminomutase activity	MOLECULAR_FUNCTION	0.00164996	0.000217853	3	4	4239	222004
[OVER]	GO:0008124	4-alpha-hydroxytetrahydrobiopterin dehydratase activity	MOLECULAR_FUNCTION	0.00164996	0.000217853	3	4	4239	222004
[OVER]	GO:0033730	arogenate dehydrogenase (NADP+) activity	MOLECULAR_FUNCTION	0.00164996	0.000217853	3	4	4239	222004
[OVER]	GO:0030125	clathrin vesicle coat	CELLULAR_COMPONENT	0.00166232	0.000220027	8	78	4234	221930
[OVER]	GO:0010098	suspensor development	BIOLOGICAL_PROCESS	0.00168015	0.000222798	5	25	4237	221983
[OVER]	GO:0000304	response to singlet oxygen	BIOLOGICAL_PROCESS	0.00168015	0.000222798	5	25	4237	221983
[OVER]	GO:0016597	amino acid binding	MOLECULAR_FUNCTION	0.00173815	0.000230771	15	257	4227	221751
[OVER]	GO:0009690	cytokinin metabolic process	BIOLOGICAL_PROCESS	0.00177588	0.000235925	14	229	4228	221779
[OVER]	GO:0051205	protein insertion into membrane	BIOLOGICAL_PROCESS	0.00180415	0.000240122	7	59	4235	221949
[OVER]	GO:0019853	L-ascorbic acid biosynthetic process	BIOLOGICAL_PROCESS	0.00180415	0.000240122	7	59	4235	221949
[OVER]	GO:0033385	geranylgeranyl diphosphate metabolic process	BIOLOGICAL_PROCESS	0.00180705	0.000241538	4	13	4238	221995
[OVER]	GO:0022883	zinc efflux transmembrane transporter activity	MOLECULAR_FUNCTION	0.00180705	0.000241538	4	13	4238	221995
[OVER]	GO:0004324	ferredoxin-NADP+ reductase activity	MOLECULAR_FUNCTION	0.00180705	0.000241538	4	13	4238	221995
[OVER]	GO:0036381	pyridoxal 5'-phosphate synthase (glutamine hydrolysing) activity	MOLECULAR_FUNCTION	0.00180705	0.000241538	4	13	4238	221995
[OVER]	GO:0004124	cysteine synthase activity	MOLECULAR_FUNCTION	0.00192526	0.000257903	8	80	4234	221928
[OVER]	GO:0015157	oligosaccharide transmembrane transporter activity	MOLECULAR_FUNCTION	0.00194961	0.000261546	5	26	4237	221982
[OVER]	GO:0070569	uridylyltransferase activity	MOLECULAR_FUNCTION	0.00201459	0.000270592	6	42	4236	221966
[OVER]	GO:0071941	nitrogen cycle metabolic process	BIOLOGICAL_PROCESS	0.00205144	0.000275876	9	103	4233	221905
[OVER]	GO:0051539	4 iron, 4 sulfur cluster binding	MOLECULAR_FUNCTION	0.00206695	0.00027813	19	384	4223	221624
[OVER]	GO:0030433	ubiquitin-dependent ERAD pathway	BIOLOGICAL_PROCESS	0.00218689	0.000294804	9	104	4233	221904
[OVER]	GO:0006614	SRP-dependent cotranslational protein targeting to membrane	BIOLOGICAL_PROCESS	0.00222979	0.00030095	8	82	4234	221926
[OVER]	GO:0000105	histidine biosynthetic process	BIOLOGICAL_PROCESS	0.00224578	0.000303475	6	43	4236	221965
[OVER]	GO:0043132	NAD transport	BIOLOGICAL_PROCESS	0.0022599	0.000305934	4	14	4238	221994
[OVER]	GO:0004816	asparagine-tRNA ligase activity	MOLECULAR_FUNCTION	0.0022599	0.000305934	4	14	4238	221994
[OVER]	GO:0000394	RNA splicing, via endonucleolytic cleavage and ligation	BIOLOGICAL_PROCESS	0.00229606	0.000311016	26	610	4216	221398
[OVER]	GO:0010583	response to cyclopentenone	BIOLOGICAL_PROCESS	0.00232185	0.000314699	14	236	4228	221772
[OVER]	GO:0015749	monosaccharide transmembrane transport	BIOLOGICAL_PROCESS	0.00240434	0.000326076	15	266	4227	221742
[OVER]	GO:0080141	regulation of jasmonic acid biosynthetic process	BIOLOGICAL_PROCESS	0.00251156	0.000343686	3	5	4239	222003
[OVER]	GO:0000489	maturation of SSU-rRNA from tetracistronic rRNA transcript (SSU-rRNA, LSU-rRNA, 4.5S-rRNA, 5S-rRNA)	BIOLOGICAL_PROCESS	0.00251156	0.000343686	3	5	4239	222003
[OVER]	GO:0000488	maturation of LSU-rRNA from tetracistronic rRNA transcript (SSU-rRNA, LSU-rRNA, 4.5S-rRNA, 5S-rRNA)	BIOLOGICAL_PROCESS	0.00251156	0.000343686	3	5	4239	222003
[OVER]	GO:0045962	positive regulation of development, heterochronic	BIOLOGICAL_PROCESS	0.00251156	0.000343686	3	5	4239	222003
[OVER]	GO:0010115	regulation of abscisic acid biosynthetic process	BIOLOGICAL_PROCESS	0.00251156	0.000343686	3	5	4239	222003
[OVER]	GO:0031679	NADH dehydrogenase (plastoquinone) activity	MOLECULAR_FUNCTION	0.00251156	0.000343686	3	5	4239	222003
[OVER]	GO:0052924	all-trans-nonaprenyl-diphosphate synthase (geranylgeranyl-diphosphate specific) activity	MOLECULAR_FUNCTION	0.00251156	0.000343686	3	5	4239	222003
[OVER]	GO:0016166	phytoene dehydrogenase activity	MOLECULAR_FUNCTION	0.00251156	0.000343686	3	5	4239	222003
[OVER]	GO:0045157	electron transporter, transferring electrons within the noncyclic electron transport pathway of photosynthesis activity	MOLECULAR_FUNCTION	0.00251156	0.000343686	3	5	4239	222003
[OVER]	GO:0004791	thioredoxin-disulfide reductase activity	MOLECULAR_FUNCTION	0.00251156	0.000343686	3	5	4239	222003
[OVER]	GO:0005245	voltage-gated calcium channel activity	MOLECULAR_FUNCTION	0.00251156	0.000343686	3	5	4239	222003
[OVER]	GO:0018105	peptidyl-serine phosphorylation	BIOLOGICAL_PROCESS	0.00252677	0.000346384	7	63	4235	221945
[OVER]	GO:0030131	clathrin adaptor complex	CELLULAR_COMPONENT	0.00252677	0.000346384	7	63	4235	221945
[OVER]	GO:0030145	manganese ion binding	MOLECULAR_FUNCTION	0.00253146	0.000347233	11	156	4231	221852
[OVER]	GO:0042794	plastid rRNA transcription	BIOLOGICAL_PROCESS	0.00254108	0.00035145	2	0	4240	222008
[OVER]	GO:0019567	arabinose biosynthetic process	BIOLOGICAL_PROCESS	0.00254108	0.00035145	2	0	4240	222008
[OVER]	GO:2000071	regulation of defense response by callose deposition	BIOLOGICAL_PROCESS	0.00254108	0.00035145	2	0	4240	222008
[OVER]	GO:1901975	glycerate transmembrane transport	BIOLOGICAL_PROCESS	0.00254108	0.00035145	2	0	4240	222008
[OVER]	GO:0010423	negative regulation of brassinosteroid biosynthetic process	BIOLOGICAL_PROCESS	0.00254108	0.00035145	2	0	4240	222008
[OVER]	GO:0090143	nucleoid organization	BIOLOGICAL_PROCESS	0.00254108	0.00035145	2	0	4240	222008
[OVER]	GO:0097339	glycolate transmembrane transport	BIOLOGICAL_PROCESS	0.00254108	0.00035145	2	0	4240	222008
[OVER]	GO:0050464	nitrate reductase (NADPH) activity	MOLECULAR_FUNCTION	0.00254108	0.00035145	2	0	4240	222008
[OVER]	GO:0010301	xanthoxin dehydrogenase activity	MOLECULAR_FUNCTION	0.00254108	0.00035145	2	0	4240	222008
[OVER]	GO:1901974	glycerate transmembrane transporter activity	MOLECULAR_FUNCTION	0.00254108	0.00035145	2	0	4240	222008
[OVER]	GO:0043879	glycolate transmembrane transporter activity	MOLECULAR_FUNCTION	0.00254108	0.00035145	2	0	4240	222008
[OVER]	GO:0033728	divinyl chlorophyllide a 8-vinyl-reductase activity	MOLECULAR_FUNCTION	0.00254108	0.00035145	2	0	4240	222008
[OVER]	GO:0009571	proplastid stroma	CELLULAR_COMPONENT	0.00254108	0.00035145	2	0	4240	222008
[OVER]	GO:0005355	glucose transmembrane transporter activity	MOLECULAR_FUNCTION	0.00261417	0.000361772	13	211	4229	221797
[OVER]	GO:0010182	sugar mediated signaling pathway	BIOLOGICAL_PROCESS	0.00264698	0.000366744	22	484	4220	221524
[OVER]	GO:0016861	intramolecular oxidoreductase activity, interconverting aldoses and ketoses	MOLECULAR_FUNCTION	0.00271477	0.000376357	8	85	4234	221923
[OVER]	GO:0000466	maturation of 5.8S rRNA from tricistronic rRNA transcript (SSU-rRNA, 5.8S rRNA, LSU-rRNA)	BIOLOGICAL_PROCESS	0.00272605	0.000378587	6	45	4236	221963
[OVER]	GO:0019205	nucleobase-containing compound kinase activity	MOLECULAR_FUNCTION	0.00272605	0.000378253	15	270	4227	221738
[OVER]	GO:0045735	nutrient reservoir activity	MOLECULAR_FUNCTION	0.00301351	0.00041949	10	134	4232	221874
[OVER]	GO:0007568	aging	BIOLOGICAL_PROCESS	0.00317269	0.000442167	25	590	4217	221418
[OVER]	GO:0022904	respiratory electron transport chain	BIOLOGICAL_PROCESS	0.00333149	0.000465655	14	246	4228	221762
[OVER]	GO:0042539	hypotonic salinity response	BIOLOGICAL_PROCESS	0.00335172	0.00047012	4	16	4238	221992
[OVER]	GO:0033743	peptide-methionine (R)-S-oxide reductase activity	MOLECULAR_FUNCTION	0.00335172	0.00047012	4	16	4238	221992
[OVER]	GO:0009727	detection of ethylene stimulus	BIOLOGICAL_PROCESS	0.0036073	0.000508319	3	6	4239	222002
[OVER]	GO:0042817	pyridoxal metabolic process	BIOLOGICAL_PROCESS	0.0036073	0.000508319	3	6	4239	222002
[OVER]	GO:0050072	m7G(5')pppN diphosphatase activity	MOLECULAR_FUNCTION	0.0036073	0.000508319	3	6	4239	222002
[OVER]	GO:0005451	monovalent cation:proton antiporter activity	MOLECULAR_FUNCTION	0.00365665	0.000515571	11	164	4231	221844
[OVER]	GO:0016161	beta-amylase activity	MOLECULAR_FUNCTION	0.0036691	0.000517625	6	48	4236	221960
[OVER]	GO:0055065	metal ion homeostasis	BIOLOGICAL_PROCESS	0.00367138	0.000518246	31	816	4211	221192
[OVER]	GO:0004616	phosphogluconate dehydrogenase (decarboxylating) activity	MOLECULAR_FUNCTION	0.00374023	0.000528878	7	68	4235	221940
[OVER]	GO:0016717	oxidoreductase activity, acting on paired donors, with oxidation of a pair of donors resulting in the reduction of molecular oxygen to two molecules of water	MOLECULAR_FUNCTION	0.00374023	0.000528878	7	68	4235	221940
[OVER]	GO:0006888	endoplasmic reticulum to Golgi vesicle-mediated transport	BIOLOGICAL_PROCESS	0.00383801	0.000543329	24	557	4218	221451
[OVER]	GO:0071616	acyl-CoA biosynthetic process	BIOLOGICAL_PROCESS	0.00388293	0.000550322	9	114	4233	221894
[OVER]	GO:0048449	floral organ formation	BIOLOGICAL_PROCESS	0.00402631	0.00057097	24	562	4218	221446
[OVER]	GO:0006897	endocytosis	BIOLOGICAL_PROCESS	0.00403799	0.000573614	17	344	4225	221664
[OVER]	GO:0008559	ATPase-coupled xenobiotic transmembrane transporter activity	MOLECULAR_FUNCTION	0.00406506	0.000578121	10	140	4232	221868
[OVER]	GO:0004161	dimethylallyltranstransferase activity	MOLECULAR_FUNCTION	0.0042863	0.000611331	5	32	4237	221976
[OVER]	GO:0006535	cysteine biosynthetic process from serine	BIOLOGICAL_PROCESS	0.00429553	0.000612997	8	92	4234	221916
[OVER]	GO:0046323	glucose import	BIOLOGICAL_PROCESS	0.00479863	0.000686747	12	198	4230	221810
[OVER]	GO:0018685	alkane 1-monooxygenase activity	MOLECULAR_FUNCTION	0.00480546	0.000688899	4	18	4238	221990
[OVER]	GO:0047760	butyrate-CoA ligase activity	MOLECULAR_FUNCTION	0.00480546	0.000688899	4	18	4238	221990
[OVER]	GO:0005763	mitochondrial small ribosomal subunit	CELLULAR_COMPONENT	0.00480546	0.000688899	4	18	4238	221990
[OVER]	GO:0009051	pentose-phosphate shunt, oxidative branch	BIOLOGICAL_PROCESS	0.00482954	0.000693137	5	33	4237	221975
[OVER]	GO:0006891	intra-Golgi vesicle-mediated transport	BIOLOGICAL_PROCESS	0.00486534	0.000698951	14	257	4228	221751
[OVER]	GO:0004332	fructose-bisphosphate aldolase activity	MOLECULAR_FUNCTION	0.00486534	0.000699068	8	94	4234	221914
[OVER]	GO:0015081	sodium ion transmembrane transporter activity	MOLECULAR_FUNCTION	0.00493023	0.000709194	10	144	4232	221864
[OVER]	GO:0004312	fatty acid synthase activity	MOLECULAR_FUNCTION	0.00493023	0.000709194	10	144	4232	221864
[OVER]	GO:0006729	tetrahydrobiopterin biosynthetic process	BIOLOGICAL_PROCESS	0.00493578	0.000716024	3	7	4239	222001
[OVER]	GO:0043686	co-translational protein modification	BIOLOGICAL_PROCESS	0.00493578	0.000716024	3	7	4239	222001
[OVER]	GO:0006433	prolyl-tRNA aminoacylation	BIOLOGICAL_PROCESS	0.00493578	0.000716024	3	7	4239	222001
[OVER]	GO:0050347	trans-octaprenyltranstransferase activity	MOLECULAR_FUNCTION	0.00493578	0.000716024	3	7	4239	222001
[OVER]	GO:0036402	proteasome-activating ATPase activity	MOLECULAR_FUNCTION	0.00493578	0.000716024	3	7	4239	222001
[OVER]	GO:0004827	proline-tRNA ligase activity	MOLECULAR_FUNCTION	0.00493578	0.000716024	3	7	4239	222001
[OVER]	GO:0051752	phosphoglucan, water dikinase activity	MOLECULAR_FUNCTION	0.00493578	0.000716024	3	7	4239	222001
[OVER]	GO:0033721	aldehyde dehydrogenase (NADP+) activity	MOLECULAR_FUNCTION	0.00493578	0.000716024	3	7	4239	222001
[OVER]	GO:0031595	nuclear proteasome complex	CELLULAR_COMPONENT	0.00493578	0.000716024	3	7	4239	222001
[OVER]	GO:0008076	voltage-gated potassium channel complex	CELLULAR_COMPONENT	0.00493578	0.000716024	3	7	4239	222001
[OVER]	GO:0043270	positive regulation of ion transport	BIOLOGICAL_PROCESS	0.00498791	0.000723993	7	72	4235	221936
[OVER]	GO:0005795	Golgi stack	CELLULAR_COMPONENT	0.00505216	0.00073373	9	119	4233	221889
[OVER]	GO:0051172	negative regulation of nitrogen compound metabolic process	BIOLOGICAL_PROCESS	0.00515865	0.000750456	65	2183	4177	219825
[OVER]	GO:0005681	spliceosomal complex	CELLULAR_COMPONENT	0.00534165	0.000777513	14	260	4228	221748
[OVER]	GO:0016055	Wnt signaling pathway	BIOLOGICAL_PROCESS	0.00536633	0.000782854	5	34	4237	221974
[OVER]	GO:0004396	hexokinase activity	MOLECULAR_FUNCTION	0.00544083	0.000794609	8	96	4234	221912
[OVER]	GO:0008252	nucleotidase activity	MOLECULAR_FUNCTION	0.00544083	0.000794609	8	96	4234	221912
[OVER]	GO:0051788	response to misfolded protein	BIOLOGICAL_PROCESS	0.00549872	0.000804926	23	541	4219	221467
[OVER]	GO:0009787	regulation of abscisic acid-activated signaling pathway	BIOLOGICAL_PROCESS	0.00549872	0.000805302	14	261	4228	221747
[OVER]	GO:0071369	cellular response to ethylene stimulus	BIOLOGICAL_PROCESS	0.00557237	0.000816542	20	448	4222	221560
[OVER]	GO:0009783	photosystem II antenna complex	CELLULAR_COMPONENT	0.0055912	0.000821579	4	19	4238	221989
[OVER]	GO:0000221	vacuolar proton-transporting V-type ATPase, V1 domain	CELLULAR_COMPONENT	0.0055912	0.000821579	4	19	4238	221989
[OVER]	GO:0080129	proteasome core complex assembly	BIOLOGICAL_PROCESS	0.00597586	0.000879562	19	409	4223	221599
[OVER]	GO:0010229	inflorescence development	BIOLOGICAL_PROCESS	0.00611379	0.000900361	8	98	4234	221910
[OVER]	GO:0005778	peroxisomal membrane	CELLULAR_COMPONENT	0.0065395	0.00096412	9	124	4233	221884
[OVER]	GO:0010239	chloroplast mRNA processing	BIOLOGICAL_PROCESS	0.00655563	0.00097079	3	8	4239	222000
[OVER]	GO:1900871	chloroplast mRNA modification	BIOLOGICAL_PROCESS	0.00655563	0.00097079	3	8	4239	222000
[OVER]	GO:0010276	phytol kinase activity	MOLECULAR_FUNCTION	0.00655563	0.00097079	3	8	4239	222000
[OVER]	GO:0036422	heptaprenyl diphosphate synthase activity	MOLECULAR_FUNCTION	0.00655563	0.00097079	3	8	4239	222000
[OVER]	GO:0008977	prephenate dehydrogenase (NAD+) activity	MOLECULAR_FUNCTION	0.00655563	0.00097079	3	8	4239	222000
[OVER]	GO:0004665	prephenate dehydrogenase (NADP+) activity	MOLECULAR_FUNCTION	0.00655563	0.00097079	3	8	4239	222000
[OVER]	GO:0031597	cytosolic proteasome complex	CELLULAR_COMPONENT	0.00655563	0.00097079	3	8	4239	222000
[OVER]	GO:0016742	hydroxymethyl-, formyl- and related transferase activity	MOLECULAR_FUNCTION	0.00655723	0.000972074	7	76	4235	221932
[OVER]	GO:0050658	RNA transport	BIOLOGICAL_PROCESS	0.00671451	0.000997579	23	558	4219	221450
[OVER]	GO:0042157	lipoprotein metabolic process	BIOLOGICAL_PROCESS	0.00676892	0.00100621	26	665	4216	221343
[OVER]	GO:0010017	red or far-red light signaling pathway	BIOLOGICAL_PROCESS	0.00691244	0.00102811	12	208	4230	221800
[OVER]	GO:0006642	triglyceride mobilization	BIOLOGICAL_PROCESS	0.0069282	0.00104118	2	1	4240	222007
[OVER]	GO:0070455	positive regulation of heme biosynthetic process	BIOLOGICAL_PROCESS	0.0069282	0.00104118	2	1	4240	222007
[OVER]	GO:0046166	glyceraldehyde-3-phosphate biosynthetic process	BIOLOGICAL_PROCESS	0.0069282	0.00104118	2	1	4240	222007
[OVER]	GO:0043496	regulation of protein homodimerization activity	BIOLOGICAL_PROCESS	0.0069282	0.00104118	2	1	4240	222007
[OVER]	GO:0033259	plastid DNA replication	BIOLOGICAL_PROCESS	0.0069282	0.00104118	2	1	4240	222007
[OVER]	GO:0051744	3,8-divinyl protochlorophyllide a 8-vinyl reductase activity	MOLECULAR_FUNCTION	0.0069282	0.00104118	2	1	4240	222007
[OVER]	GO:0009940	amino-terminal vacuolar sorting propeptide binding	MOLECULAR_FUNCTION	0.0069282	0.00104118	2	1	4240	222007
[OVER]	GO:0047705	bilirubin oxidase activity	MOLECULAR_FUNCTION	0.0069282	0.00104118	2	1	4240	222007
[OVER]	GO:0010486	manganese:proton antiporter activity	MOLECULAR_FUNCTION	0.0069282	0.00104118	2	1	4240	222007
[OVER]	GO:0005785	signal recognition particle receptor complex	CELLULAR_COMPONENT	0.0069282	0.00104118	2	1	4240	222007
[OVER]	GO:0010370	perinucleolar chromocenter	CELLULAR_COMPONENT	0.0069282	0.00104118	2	1	4240	222007
[OVER]	GO:0016229	steroid dehydrogenase activity	MOLECULAR_FUNCTION	0.00711318	0.00107129	9	126	4233	221882
[OVER]	GO:0007264	small GTPase mediated signal transduction	BIOLOGICAL_PROCESS	0.00712495	0.00107365	20	462	4222	221546
[OVER]	GO:2000113	negative regulation of cellular macromolecule biosynthetic process	BIOLOGICAL_PROCESS	0.00717884	0.00108235	56	1822	4186	220186
[OVER]	GO:0009741	response to brassinosteroid	BIOLOGICAL_PROCESS	0.00725683	0.00109529	17	366	4225	221642
[OVER]	GO:0006611	protein export from nucleus	BIOLOGICAL_PROCESS	0.00730903	0.00110496	22	517	4220	221491
[OVER]	GO:0044090	positive regulation of vacuole organization	BIOLOGICAL_PROCESS	0.0075194	0.00113921	4	21	4238	221987
[OVER]	GO:0006086	acetyl-CoA biosynthetic process from pyruvate	BIOLOGICAL_PROCESS	0.0075194	0.00113921	4	21	4238	221987
[OVER]	GO:0050162	oxalate oxidase activity	MOLECULAR_FUNCTION	0.0075194	0.00113921	4	21	4238	221987
[OVER]	GO:0090503	RNA phosphodiester bond hydrolysis, exonucleolytic	BIOLOGICAL_PROCESS	0.00781976	0.0011879	9	128	4233	221880
[OVER]	GO:0009805	coumarin biosynthetic process	BIOLOGICAL_PROCESS	0.00781976	0.0011879	9	128	4233	221880
[OVER]	GO:0010646	regulation of cell communication	BIOLOGICAL_PROCESS	0.00798165	0.00121509	35	1009	4207	220999
[OVER]	GO:0051219	phosphoprotein binding	MOLECULAR_FUNCTION	0.00806887	0.00123034	5	38	4237	221970
[OVER]	GO:0016992	lipoate synthase activity	MOLECULAR_FUNCTION	0.00806887	0.00123034	5	38	4237	221970
[OVER]	GO:0055072	iron ion homeostasis	BIOLOGICAL_PROCESS	0.00827334	0.00126354	18	388	4224	221620
[OVER]	GO:0004441	inositol-1,4-bisphosphate 1-phosphatase activity	MOLECULAR_FUNCTION	0.00833933	0.00127634	3	9	4239	221999
[OVER]	GO:0000160	phosphorelay signal transduction system	BIOLOGICAL_PROCESS	0.0085333	0.00130741	25	639	4217	221369
[OVER]	GO:0042542	response to hydrogen peroxide	BIOLOGICAL_PROCESS	0.00860049	0.00131911	22	533	4220	221475
[OVER]	GO:0009970	cellular response to sulfate starvation	BIOLOGICAL_PROCESS	0.00890202	0.00136681	5	39	4237	221969
[OVER]	GO:0004842	ubiquitin-protein transferase activity	MOLECULAR_FUNCTION	0.00914256	0.00140523	34	967	4208	221041
[OVER]	GO:0004722	protein serine/threonine phosphatase activity	MOLECULAR_FUNCTION	0.00914374	0.00140616	23	579	4219	221429
[OVER]	GO:0051139	metal ion:proton antiporter activity	MOLECULAR_FUNCTION	0.00935817	0.00144142	8	106	4234	221902
[OVER]	GO:0003690	double-stranded DNA binding	MOLECULAR_FUNCTION	0.00960697	0.00148052	30	833	4212	221175
[OVER]	GO:0070972	protein localization to endoplasmic reticulum	BIOLOGICAL_PROCESS	0.00992639	0.00153137	11	189	4231	221819
[OVER]	GO:0009768	photosynthesis, light harvesting in photosystem I	BIOLOGICAL_PROCESS	0.00993379	0.00153413	4	23	4238	221985
[OVER]	GO:0000312	plastid small ribosomal subunit	CELLULAR_COMPONENT	0.00993379	0.00153413	4	23	4238	221985

## Sheet: TransM12_EnrichGO
Table S14 Gene ontology (GO) enrichment analysis of transcript modules sharing high correlation coefficient (PCC > 0.7) with the identified metabolite modules in Mallotus japonicus.
Tags	GO ID	GO Name	GO Category	FDR	P-Value	Nr Test	Nr Reference	Non Annot Test	Non Annot Reference
[OVER]	GO:0055114	oxidation-reduction process	BIOLOGICAL_PROCESS	1.49089e-91	4.37177e-94	343	8979	1953	214975
[OVER]	GO:0003700	DNA-binding transcription factor activity	MOLECULAR_FUNCTION	3.79606e-57	2.00981e-59	146	2544	2150	221410
[OVER]	GO:0010200	response to chitin	BIOLOGICAL_PROCESS	2.47071e-50	1.48923e-52	87	890	2209	223064
[OVER]	GO:0005886	plasma membrane	CELLULAR_COMPONENT	8.23385e-48	5.63365e-50	288	10442	2008	213512
[OVER]	GO:0009697	salicylic acid biosynthetic process	BIOLOGICAL_PROCESS	6.80041e-36	8.30872e-38	58	533	2238	223421
[OVER]	GO:0005506	iron ion binding	MOLECULAR_FUNCTION	5.09107e-28	8.29367e-30	74	1333	2222	222621
[OVER]	GO:0009611	response to wounding	BIOLOGICAL_PROCESS	9.20595e-28	1.5072e-29	63	949	2233	223005
[OVER]	GO:0005524	ATP binding	MOLECULAR_FUNCTION	9.99281e-27	1.67673e-28	238	10524	2058	213430
[OVER]	GO:0009507	chloroplast	CELLULAR_COMPONENT	4.85538e-26	8.34475e-28	284	13795	2012	210159
[OVER]	GO:0010363	regulation of plant-type hypersensitive response	BIOLOGICAL_PROCESS	1.49852e-25	2.62428e-27	61	978	2235	222976
[OVER]	GO:0000165	MAPK cascade	BIOLOGICAL_PROCESS	4.0879e-25	7.32539e-27	68	1259	2228	222695
[OVER]	GO:0002679	respiratory burst involved in defense response	BIOLOGICAL_PROCESS	1.84334e-24	3.3933e-26	30	163	2266	223791
[OVER]	GO:0050832	defense response to fungus	BIOLOGICAL_PROCESS	2.55469e-24	4.72359e-26	61	1037	2235	222917
[OVER]	GO:0020037	heme binding	MOLECULAR_FUNCTION	4.7076e-24	8.74263e-26	67	1279	2229	222675
[OVER]	GO:0009867	jasmonic acid mediated signaling pathway	BIOLOGICAL_PROCESS	5.77613e-24	1.07741e-25	51	708	2245	223246
[OVER]	GO:0004462	lactoylglutathione lyase activity	MOLECULAR_FUNCTION	1.48604e-23	2.8324e-25	24	83	2272	223871
[OVER]	GO:0009612	response to mechanical stimulus	BIOLOGICAL_PROCESS	1.32397e-22	2.64211e-24	25	107	2271	223847
[OVER]	GO:0032440	2-alkenal reductase [NAD(P)+] activity	MOLECULAR_FUNCTION	2.84889e-22	5.75486e-24	71	1554	2225	222400
[OVER]	GO:0016021	integral component of membrane	CELLULAR_COMPONENT	5.15281e-22	1.05348e-23	237	11391	2059	212563
[OVER]	GO:0010310	regulation of hydrogen peroxide metabolic process	BIOLOGICAL_PROCESS	2.3672e-21	4.99392e-23	37	383	2259	223571
[OVER]	GO:0046686	response to cadmium ion	BIOLOGICAL_PROCESS	2.17712e-20	4.75253e-22	67	1510	2229	222444
[OVER]	GO:0006612	protein targeting to membrane	BIOLOGICAL_PROCESS	1.40662e-19	3.13931e-21	56	1101	2240	222853
[OVER]	GO:0009862	systemic acquired resistance, salicylic acid mediated signaling pathway	BIOLOGICAL_PROCESS	2.00589e-19	4.52579e-21	40	533	2256	223421
[OVER]	GO:0000287	magnesium ion binding	MOLECULAR_FUNCTION	7.27783e-19	1.70134e-20	43	654	2253	223300
[OVER]	GO:0004028	3-chloroallyl aldehyde dehydrogenase activity	MOLECULAR_FUNCTION	3.63128e-17	9.10999e-19	19	82	2277	223872
[OVER]	GO:0009407	toxin catabolic process	BIOLOGICAL_PROCESS	7.38946e-17	1.89597e-18	35	473	2261	223481
[OVER]	GO:0005516	calmodulin binding	MOLECULAR_FUNCTION	9.42041e-16	2.53216e-17	38	621	2258	223333
[OVER]	GO:0005829	cytosol	CELLULAR_COMPONENT	4.40706e-15	1.20255e-16	188	9518	2108	214436
[OVER]	GO:0034002	(R)-limonene synthase activity	MOLECULAR_FUNCTION	7.51809e-14	2.14943e-15	9	5	2287	223949
[OVER]	GO:0009595	detection of biotic stimulus	BIOLOGICAL_PROCESS	2.44368e-13	7.10593e-15	25	294	2271	223660
[OVER]	GO:0051555	flavonol biosynthetic process	BIOLOGICAL_PROCESS	5.45222e-13	1.6032e-14	19	149	2277	223805
[OVER]	GO:0005509	calcium ion binding	MOLECULAR_FUNCTION	7.6436e-13	2.27351e-14	43	991	2253	222963
[OVER]	GO:0050592	4-hydroxyphenylacetaldehyde oxime monooxygenase activity	MOLECULAR_FUNCTION	1.44839e-12	4.37691e-14	18	136	2278	223818
[OVER]	GO:0047085	hydroxyphenylacetonitrile 2-monooxygenase activity	MOLECULAR_FUNCTION	1.44839e-12	4.37691e-14	18	136	2278	223818
[OVER]	GO:0080167	response to karrikin	BIOLOGICAL_PROCESS	3.37074e-12	1.03783e-13	26	366	2270	223588
[OVER]	GO:0043565	sequence-specific DNA binding	MOLECULAR_FUNCTION	5.41773e-12	1.67691e-13	49	1339	2247	222615
[OVER]	GO:0010048	vernalization response	BIOLOGICAL_PROCESS	7.71936e-12	2.42704e-13	25	348	2271	223606
[OVER]	GO:0033961	cis-stilbene-oxide hydrolase activity	MOLECULAR_FUNCTION	9.97682e-12	3.16118e-13	8	6	2288	223948
[OVER]	GO:0004157	dihydropyrimidinase activity	MOLECULAR_FUNCTION	1.21967e-11	3.88443e-13	7	2	2289	223952
[OVER]	GO:0046029	mannitol dehydrogenase activity	MOLECULAR_FUNCTION	1.30022e-11	4.15155e-13	10	21	2286	223933
[OVER]	GO:0050638	taxadien-5-alpha-ol O-acetyltransferase activity	MOLECULAR_FUNCTION	1.55079e-11	4.96423e-13	9	13	2287	223941
[OVER]	GO:0052747	sinapyl alcohol dehydrogenase activity	MOLECULAR_FUNCTION	3.65541e-11	1.19395e-12	10	24	2286	223930
[OVER]	GO:1900366	negative regulation of defense response to insect	BIOLOGICAL_PROCESS	3.89992e-11	1.28335e-12	7	3	2289	223951
[OVER]	GO:1990136	linoleate 9S-lipoxygenase activity	MOLECULAR_FUNCTION	3.89992e-11	1.28335e-12	7	3	2289	223951
[OVER]	GO:0004715	non-membrane spanning protein tyrosine kinase activity	MOLECULAR_FUNCTION	6.24053e-11	2.06882e-12	34	734	2262	223220
[OVER]	GO:0016567	protein ubiquitination	BIOLOGICAL_PROCESS	7.10568e-11	2.373e-12	51	1549	2245	222405
[OVER]	GO:0004842	ubiquitin-protein transferase activity	MOLECULAR_FUNCTION	7.70744e-11	2.58652e-12	39	962	2257	222992
[OVER]	GO:0019722	calcium-mediated signaling	BIOLOGICAL_PROCESS	8.38625e-11	2.82798e-12	18	178	2278	223776
[OVER]	GO:0033383	geranyl diphosphate metabolic process	BIOLOGICAL_PROCESS	2.74081e-10	9.37639e-12	9	20	2287	223934
[OVER]	GO:0045431	flavonol synthase activity	MOLECULAR_FUNCTION	3.28547e-10	1.12665e-11	16	143	2280	223811
[OVER]	GO:0018108	peptidyl-tyrosine phosphorylation	BIOLOGICAL_PROCESS	4.11058e-10	1.41964e-11	37	927	2259	223027
[OVER]	GO:0009506	plasmodesma	CELLULAR_COMPONENT	4.30688e-10	1.49795e-11	81	3380	2215	220574
[OVER]	GO:0008061	chitin binding	MOLECULAR_FUNCTION	7.19481e-10	2.55513e-11	9	23	2287	223931
[OVER]	GO:0045551	cinnamyl-alcohol dehydrogenase activity	MOLECULAR_FUNCTION	9.31526e-10	3.32336e-11	10	36	2286	223918
[OVER]	GO:0043900	regulation of multi-organism process	BIOLOGICAL_PROCESS	1.07352e-09	3.85618e-11	22	338	2274	223616
[OVER]	GO:0047134	protein-disulfide reductase activity	MOLECULAR_FUNCTION	1.30318e-09	4.69174e-11	9	25	2287	223929
[OVER]	GO:0051762	sesquiterpene biosynthetic process	BIOLOGICAL_PROCESS	1.3159e-09	4.75896e-11	8	15	2288	223939
[OVER]	GO:0009744	response to sucrose	BIOLOGICAL_PROCESS	1.50659e-09	5.50995e-11	32	744	2264	223210
[OVER]	GO:0006212	uracil catabolic process	BIOLOGICAL_PROCESS	1.78166e-09	6.58289e-11	7	8	2289	223946
[OVER]	GO:0019825	oxygen binding	MOLECULAR_FUNCTION	1.78166e-09	6.58852e-11	19	249	2277	223705
[OVER]	GO:0008696	4-amino-4-deoxychorismate lyase activity	MOLECULAR_FUNCTION	2.83542e-09	1.07163e-10	5	0	2291	223954
[OVER]	GO:0047810	D-alanine:2-oxoglutarate aminotransferase activity	MOLECULAR_FUNCTION	2.83542e-09	1.07163e-10	5	0	2291	223954
[OVER]	GO:0004364	glutathione transferase activity	MOLECULAR_FUNCTION	5.04496e-09	1.93136e-10	14	124	2282	223830
[OVER]	GO:0010260	animal organ senescence	BIOLOGICAL_PROCESS	6.3803e-09	2.44777e-10	13	103	2283	223851
[OVER]	GO:0010150	leaf senescence	BIOLOGICAL_PROCESS	1.1991e-08	4.69796e-10	19	282	2277	223672
[OVER]	GO:0010181	FMN binding	MOLECULAR_FUNCTION	1.56239e-08	6.18489e-10	19	287	2277	223667
[OVER]	GO:0044604	ABC-type phytochelatin transmembrane transporter activity	MOLECULAR_FUNCTION	1.90062e-08	7.58577e-10	7	13	2289	223941
[OVER]	GO:0003682	chromatin binding	MOLECULAR_FUNCTION	2.08631e-08	8.39488e-10	38	1132	2258	222822
[OVER]	GO:0009644	response to high light intensity	BIOLOGICAL_PROCESS	2.24672e-08	9.09521e-10	29	698	2267	223256
[OVER]	GO:0006499	N-terminal protein myristoylation	BIOLOGICAL_PROCESS	2.73485e-08	1.11381e-09	24	488	2272	223466
[OVER]	GO:0010583	response to cyclopentenone	BIOLOGICAL_PROCESS	3.01018e-08	1.2333e-09	17	233	2279	223721
[OVER]	GO:0052544	defense response by callose deposition in cell wall	BIOLOGICAL_PROCESS	5.4013e-08	2.24376e-09	10	59	2286	223895
[OVER]	GO:0009963	positive regulation of flavonoid biosynthetic process	BIOLOGICAL_PROCESS	5.87563e-08	2.45995e-09	15	182	2281	223772
[OVER]	GO:0031408	oxylipin biosynthetic process	BIOLOGICAL_PROCESS	6.44612e-08	2.70404e-09	16	214	2280	223740
[OVER]	GO:0042538	hyperosmotic salinity response	BIOLOGICAL_PROCESS	7.7841e-08	3.27798e-09	21	395	2275	223559
[OVER]	GO:0043069	negative regulation of programmed cell death	BIOLOGICAL_PROCESS	8.28272e-08	3.50145e-09	25	562	2271	223392
[OVER]	GO:0010337	regulation of salicylic acid metabolic process	BIOLOGICAL_PROCESS	9.66004e-08	4.14665e-09	8	30	2288	223924
[OVER]	GO:0046870	cadmium ion binding	MOLECULAR_FUNCTION	1.15671e-07	5.02179e-09	6	9	2290	223945
[OVER]	GO:0052663	antheraxanthin epoxidase activity	MOLECULAR_FUNCTION	1.1879e-07	5.17001e-09	8	31	2288	223923
[OVER]	GO:0006032	chitin catabolic process	BIOLOGICAL_PROCESS	1.25855e-07	5.54596e-09	9	47	2287	223907
[OVER]	GO:0004568	chitinase activity	MOLECULAR_FUNCTION	1.25855e-07	5.54596e-09	9	47	2287	223907
[OVER]	GO:0005777	peroxisome	CELLULAR_COMPONENT	1.30473e-07	5.78134e-09	36	1113	2260	222841
[OVER]	GO:0008559	ATPase-coupled xenobiotic transmembrane transporter activity	MOLECULAR_FUNCTION	1.33419e-07	5.92273e-09	13	137	2283	223817
[OVER]	GO:0008806	carboxymethylenebutenolidase activity	MOLECULAR_FUNCTION	1.78123e-07	7.96527e-09	6	10	2290	223944
[OVER]	GO:0070291	N-acylethanolamine metabolic process	BIOLOGICAL_PROCESS	1.81633e-07	8.1666e-09	7	20	2289	223934
[OVER]	GO:0015446	ATPase-coupled arsenite transmembrane transporter activity	MOLECULAR_FUNCTION	1.81633e-07	8.1666e-09	7	20	2289	223934
[OVER]	GO:0047412	N-(long-chain-acyl)ethanolamine deacylase activity	MOLECULAR_FUNCTION	1.81633e-07	8.1666e-09	7	20	2289	223934
[OVER]	GO:0030968	endoplasmic reticulum unfolded protein response	BIOLOGICAL_PROCESS	1.85129e-07	8.3447e-09	23	501	2273	223453
[OVER]	GO:0005310	dicarboxylic acid transmembrane transporter activity	MOLECULAR_FUNCTION	1.97682e-07	8.95095e-09	9	50	2287	223904
[OVER]	GO:0052662	zeaxanthin epoxidase activity	MOLECULAR_FUNCTION	2.11275e-07	9.65427e-09	8	34	2288	223920
[OVER]	GO:0009540	zeaxanthin epoxidase [overall] activity	MOLECULAR_FUNCTION	2.11275e-07	9.65427e-09	8	34	2288	223920
[OVER]	GO:0019295	coenzyme M biosynthetic process	BIOLOGICAL_PROCESS	2.30262e-07	1.05781e-08	4	0	2292	223954
[OVER]	GO:0043817	phosphosulfolactate synthase activity	MOLECULAR_FUNCTION	2.30262e-07	1.05781e-08	4	0	2292	223954
[OVER]	GO:0010286	heat acclimation	BIOLOGICAL_PROCESS	2.39069e-07	1.10022e-08	15	205	2281	223749
[OVER]	GO:0048481	plant ovule development	BIOLOGICAL_PROCESS	2.63943e-07	1.22329e-08	23	512	2273	223442
[OVER]	GO:0005507	copper ion binding	MOLECULAR_FUNCTION	2.84315e-07	1.32234e-08	30	841	2266	223113
[OVER]	GO:0005739	mitochondrion	CELLULAR_COMPONENT	2.90191e-07	1.3544e-08	190	12069	2106	211885
[OVER]	GO:0043481	anthocyanin accumulation in tissues in response to UV light	BIOLOGICAL_PROCESS	3.03788e-07	1.42776e-08	18	314	2278	223640
[OVER]	GO:0009741	response to brassinosteroid	BIOLOGICAL_PROCESS	4.9373e-07	2.37274e-08	19	364	2277	223590
[OVER]	GO:1902448	positive regulation of shade avoidance	BIOLOGICAL_PROCESS	5.36811e-07	2.58851e-08	5	5	2291	223949
[OVER]	GO:0048281	inflorescence morphogenesis	BIOLOGICAL_PROCESS	6.10991e-07	2.96115e-08	7	25	2289	223929
[OVER]	GO:0004190	aspartic-type endopeptidase activity	MOLECULAR_FUNCTION	6.85848e-07	3.34628e-08	25	634	2271	223320
[OVER]	GO:0004029	aldehyde dehydrogenase (NAD+) activity	MOLECULAR_FUNCTION	7.5481e-07	3.70119e-08	15	226	2281	223728
[OVER]	GO:0050630	(iso)eugenol O-methyltransferase activity	MOLECULAR_FUNCTION	7.5845e-07	3.72522e-08	7	26	2289	223928
[OVER]	GO:0008153	para-aminobenzoic acid biosynthetic process	BIOLOGICAL_PROCESS	9.45512e-07	4.70561e-08	5	6	2291	223948
[OVER]	GO:0006569	tryptophan catabolic process	BIOLOGICAL_PROCESS	1.1385e-06	5.6846e-08	15	234	2281	223720
[OVER]	GO:0007030	Golgi organization	BIOLOGICAL_PROCESS	1.37997e-06	6.98024e-08	25	660	2271	223294
[OVER]	GO:0016756	glutathione gamma-glutamylcysteinyltransferase activity	MOLECULAR_FUNCTION	1.39908e-06	7.08828e-08	7	29	2289	223925
[OVER]	GO:0004143	diacylglycerol kinase activity	MOLECULAR_FUNCTION	1.5056e-06	7.64019e-08	8	46	2288	223908
[OVER]	GO:0007205	protein kinase C-activating G protein-coupled receptor signaling pathway	BIOLOGICAL_PROCESS	1.73221e-06	8.86069e-08	8	47	2288	223907
[OVER]	GO:0003854	3-beta-hydroxy-delta5-steroid dehydrogenase activity	MOLECULAR_FUNCTION	1.73221e-06	8.86069e-08	8	47	2288	223907
[OVER]	GO:0010076	maintenance of floral meristem identity	BIOLOGICAL_PROCESS	1.83244e-06	9.44805e-08	6	17	2290	223937
[OVER]	GO:0046863	ribulose-1,5-bisphosphate carboxylase/oxygenase activator activity	MOLECULAR_FUNCTION	1.83244e-06	9.44805e-08	6	17	2290	223937
[OVER]	GO:0009873	ethylene-activated signaling pathway	BIOLOGICAL_PROCESS	2.07808e-06	1.07822e-07	19	403	2277	223551
[OVER]	GO:0006833	water transport	BIOLOGICAL_PROCESS	2.23545e-06	1.16716e-07	21	492	2275	223462
[OVER]	GO:0009693	ethylene biosynthetic process	BIOLOGICAL_PROCESS	2.30899e-06	1.21684e-07	16	286	2280	223668
[OVER]	GO:0015700	arsenite transport	BIOLOGICAL_PROCESS	2.40585e-06	1.27181e-07	7	32	2289	223922
[OVER]	GO:0006671	phytosphingosine metabolic process	BIOLOGICAL_PROCESS	2.43435e-06	1.28885e-07	5	8	2291	223946
[OVER]	GO:0009413	response to flooding	BIOLOGICAL_PROCESS	2.89951e-06	1.56111e-07	4	2	2292	223952
[OVER]	GO:0042178	xenobiotic catabolic process	BIOLOGICAL_PROCESS	2.89951e-06	1.56111e-07	4	2	2292	223952
[OVER]	GO:0033858	N-acetylgalactosamine kinase activity	MOLECULAR_FUNCTION	2.89951e-06	1.56111e-07	4	2	2292	223952
[OVER]	GO:0080124	pheophytinase activity	MOLECULAR_FUNCTION	2.89951e-06	1.56111e-07	4	2	2292	223952
[OVER]	GO:0001666	response to hypoxia	BIOLOGICAL_PROCESS	2.95863e-06	1.59535e-07	13	185	2283	223769
[OVER]	GO:0009805	coumarin biosynthetic process	BIOLOGICAL_PROCESS	3.47609e-06	1.89137e-07	11	126	2285	223828
[OVER]	GO:0015297	antiporter activity	MOLECULAR_FUNCTION	3.81138e-06	2.0769e-07	24	652	2272	223302
[OVER]	GO:0009830	cell wall modification involved in abscission	BIOLOGICAL_PROCESS	4.85194e-06	2.67589e-07	6	21	2290	223933
[OVER]	GO:0000394	RNA splicing, via endonucleolytic cleavage and ligation	BIOLOGICAL_PROCESS	4.85194e-06	2.67949e-07	23	613	2273	223341
[OVER]	GO:0006855	drug transmembrane transport	BIOLOGICAL_PROCESS	6.07529e-06	3.39534e-07	19	436	2277	223518
[OVER]	GO:0009624	response to nematode	BIOLOGICAL_PROCESS	6.07529e-06	3.39963e-07	16	310	2280	223644
[OVER]	GO:0009809	lignin biosynthetic process	BIOLOGICAL_PROCESS	7.31651e-06	4.12399e-07	11	137	2285	223817
[OVER]	GO:0042344	indole glucosinolate catabolic process	BIOLOGICAL_PROCESS	7.47643e-06	4.22022e-07	6	23	2290	223931
[OVER]	GO:0005345	purine nucleobase transmembrane transporter activity	MOLECULAR_FUNCTION	1.04867e-05	6.00484e-07	8	62	2288	223892
[OVER]	GO:0016034	maleylacetoacetate isomerase activity	MOLECULAR_FUNCTION	1.04867e-05	5.99084e-07	5	12	2291	223942
[OVER]	GO:0016210	naringenin-chalcone synthase activity	MOLECULAR_FUNCTION	1.04867e-05	5.99084e-07	5	12	2291	223942
[OVER]	GO:0006096	glycolytic process	BIOLOGICAL_PROCESS	1.07884e-05	6.19518e-07	32	1126	2264	222828
[OVER]	GO:0006593	ornithine catabolic process	BIOLOGICAL_PROCESS	1.2429e-05	7.16767e-07	4	4	2292	223950
[OVER]	GO:0004587	ornithine-oxo-acid transaminase activity	MOLECULAR_FUNCTION	1.2429e-05	7.16767e-07	4	4	2292	223950
[OVER]	GO:0000186	activation of MAPKK activity	BIOLOGICAL_PROCESS	1.2839e-05	7.42502e-07	23	652	2273	223302
[OVER]	GO:1900425	negative regulation of defense response to bacterium	BIOLOGICAL_PROCESS	1.34687e-05	7.84405e-07	6	26	2290	223928
[OVER]	GO:0042631	cellular response to water deprivation	BIOLOGICAL_PROCESS	1.41216e-05	8.29329e-07	14	253	2282	223701
[OVER]	GO:0004709	MAP kinase kinase kinase activity	MOLECULAR_FUNCTION	1.68792e-05	9.99527e-07	23	664	2273	223290
[OVER]	GO:0048046	apoplast	CELLULAR_COMPONENT	1.69475e-05	1.00495e-06	34	1269	2262	222685
[OVER]	GO:0016844	strictosidine synthase activity	MOLECULAR_FUNCTION	1.91894e-05	1.14414e-06	6	28	2290	223926
[OVER]	GO:0052577	germacrene-D synthase activity	MOLECULAR_FUNCTION	2.1318e-05	1.27974e-06	4	5	2292	223949
[OVER]	GO:0034004	germacradienol synthase activity	MOLECULAR_FUNCTION	2.1318e-05	1.27974e-06	4	5	2292	223949
[OVER]	GO:0009695	jasmonic acid biosynthetic process	BIOLOGICAL_PROCESS	2.22312e-05	1.33637e-06	19	480	2277	223474
[OVER]	GO:0010183	pollen tube guidance	BIOLOGICAL_PROCESS	2.35185e-05	1.4195e-06	10	125	2286	223829
[OVER]	GO:0006694	steroid biosynthetic process	BIOLOGICAL_PROCESS	2.39025e-05	1.44462e-06	24	731	2272	223223
[OVER]	GO:0004722	protein serine/threonine phosphatase activity	MOLECULAR_FUNCTION	2.51377e-05	1.52952e-06	21	581	2275	223373
[OVER]	GO:0009690	cytokinin metabolic process	BIOLOGICAL_PROCESS	2.65822e-05	1.62174e-06	13	230	2283	223724
[OVER]	GO:0008270	zinc ion binding	MOLECULAR_FUNCTION	2.82008e-05	1.72508e-06	103	6088	2193	217866
[OVER]	GO:0046938	phytochelatin biosynthetic process	BIOLOGICAL_PROCESS	3.12106e-05	1.92699e-06	6	31	2290	223923
[OVER]	GO:0080044	quercetin 7-O-glucosyltransferase activity	MOLECULAR_FUNCTION	3.64066e-05	2.26856e-06	6	32	2290	223922
[OVER]	GO:0015914	phospholipid transport	BIOLOGICAL_PROCESS	3.77865e-05	2.36377e-06	7	52	2289	223902
[OVER]	GO:0046777	protein autophosphorylation	BIOLOGICAL_PROCESS	3.78877e-05	2.37319e-06	29	1029	2267	222925
[OVER]	GO:0061025	membrane fusion	BIOLOGICAL_PROCESS	4.28598e-05	2.6951e-06	27	923	2269	223031
[OVER]	GO:0007338	single fertilization	BIOLOGICAL_PROCESS	4.88554e-05	3.09675e-06	5	18	2291	223936
[OVER]	GO:0009931	calcium-dependent protein serine/threonine kinase activity	MOLECULAR_FUNCTION	4.88554e-05	3.09675e-06	5	18	2291	223936
[OVER]	GO:0045552	dihydrokaempferol 4-reductase activity	MOLECULAR_FUNCTION	5.74196e-05	3.67613e-06	10	140	2286	223814
[OVER]	GO:0009556	microsporogenesis	BIOLOGICAL_PROCESS	5.92228e-05	3.80122e-06	12	211	2284	223743
[OVER]	GO:0047213	anthocyanidin 3-O-glucosyltransferase activity	MOLECULAR_FUNCTION	6.00059e-05	3.86126e-06	13	250	2283	223704
[OVER]	GO:0043693	monoterpene biosynthetic process	BIOLOGICAL_PROCESS	6.42246e-05	4.14318e-06	3	1	2293	223953
[OVER]	GO:0019048	modulation by virus of host process	BIOLOGICAL_PROCESS	7.40854e-05	4.79742e-06	6	37	2290	223917
[OVER]	GO:0006470	protein dephosphorylation	BIOLOGICAL_PROCESS	7.79699e-05	5.06166e-06	28	1014	2268	222940
[OVER]	GO:0009750	response to fructose	BIOLOGICAL_PROCESS	8.3175e-05	5.41312e-06	18	482	2278	223472
[OVER]	GO:0046685	response to arsenic-containing substance	BIOLOGICAL_PROCESS	8.5924e-05	5.60602e-06	9	115	2287	223839
[OVER]	GO:0004737	pyruvate decarboxylase activity	MOLECULAR_FUNCTION	8.97958e-05	5.90252e-06	5	21	2291	223933
[OVER]	GO:0031902	late endosome membrane	CELLULAR_COMPONENT	0.00010142	6.68313e-06	8	88	2288	223866
[OVER]	GO:0043531	ADP binding	MOLECULAR_FUNCTION	0.000106379	7.05323e-06	23	751	2273	223203
[UNDER]	GO:0006364	rRNA processing	BIOLOGICAL_PROCESS	0.000107226	7.11813e-06	1	1515	2295	222439
[OVER]	GO:0008891	glycolate oxidase activity	MOLECULAR_FUNCTION	0.000107809	7.18206e-06	6	40	2290	223914
[OVER]	GO:0017077	oxidative phosphorylation uncoupler activity	MOLECULAR_FUNCTION	0.000107809	7.18319e-06	5	22	2291	223932
[OVER]	GO:0016998	cell wall macromolecule catabolic process	BIOLOGICAL_PROCESS	0.000108215	7.21906e-06	8	89	2288	223865
[OVER]	GO:0009684	indoleacetic acid biosynthetic process	BIOLOGICAL_PROCESS	0.000113538	7.58335e-06	13	267	2283	223687
[OVER]	GO:0015936	coenzyme A metabolic process	BIOLOGICAL_PROCESS	0.000147067	9.97856e-06	7	66	2289	223888
[OVER]	GO:0055091	phospholipid homeostasis	BIOLOGICAL_PROCESS	0.000150955	1.02793e-05	3	2	2293	223952
[OVER]	GO:0055089	fatty acid homeostasis	BIOLOGICAL_PROCESS	0.000150955	1.02793e-05	3	2	2293	223952
[OVER]	GO:0003951	NAD+ kinase activity	MOLECULAR_FUNCTION	0.000152879	1.04476e-05	6	43	2290	223911
[OVER]	GO:0016272	prefoldin complex	CELLULAR_COMPONENT	0.000152879	1.04476e-05	6	43	2290	223911
[OVER]	GO:0009608	response to symbiont	BIOLOGICAL_PROCESS	0.000156402	1.07266e-05	11	196	2285	223758
[OVER]	GO:0010264	myo-inositol hexakisphosphate biosynthetic process	BIOLOGICAL_PROCESS	0.000168451	1.15941e-05	12	237	2284	223717
[OVER]	GO:0047558	3-cyanoalanine hydratase activity	MOLECULAR_FUNCTION	0.000178781	1.23634e-05	5	25	2291	223929
[OVER]	GO:0047427	cyanoalanine nitrilase activity	MOLECULAR_FUNCTION	0.000178781	1.23634e-05	5	25	2291	223929
[OVER]	GO:0015824	proline transport	BIOLOGICAL_PROCESS	0.000181357	1.25563e-05	12	239	2284	223715
[OVER]	GO:0016558	protein import into peroxisome matrix	BIOLOGICAL_PROCESS	0.000188414	1.30909e-05	18	516	2278	223438
[OVER]	GO:0042802	identical protein binding	MOLECULAR_FUNCTION	0.00020279	1.42219e-05	27	1016	2269	222938
[OVER]	GO:0017050	D-erythro-sphingosine kinase activity	MOLECULAR_FUNCTION	0.000207945	1.46173e-05	5	26	2291	223928
[OVER]	GO:0048443	stamen development	BIOLOGICAL_PROCESS	0.000208793	1.47279e-05	16	422	2280	223532
[OVER]	GO:0019500	cyanide catabolic process	BIOLOGICAL_PROCESS	0.000239394	1.71789e-05	5	27	2291	223927
[OVER]	GO:0051410	detoxification of nitrogen compound	BIOLOGICAL_PROCESS	0.000239394	1.71789e-05	5	27	2291	223927
[OVER]	GO:0006571	tyrosine biosynthetic process	BIOLOGICAL_PROCESS	0.000242544	1.74643e-05	4	12	2292	223942
[OVER]	GO:0042406	extrinsic component of endoplasmic reticulum membrane	CELLULAR_COMPONENT	0.000242544	1.74643e-05	4	12	2292	223942
[OVER]	GO:0004857	enzyme inhibitor activity	MOLECULAR_FUNCTION	0.000246683	1.78025e-05	12	248	2284	223706
[OVER]	GO:0010218	response to far red light	BIOLOGICAL_PROCESS	0.000260012	1.87856e-05	15	383	2281	223571
[OVER]	GO:0008422	beta-glucosidase activity	MOLECULAR_FUNCTION	0.000267144	1.93662e-05	13	293	2283	223661
[OVER]	GO:0010224	response to UV-B	BIOLOGICAL_PROCESS	0.000276074	2.0036e-05	13	294	2283	223660
[OVER]	GO:0070328	triglyceride homeostasis	BIOLOGICAL_PROCESS	0.000279867	2.04024e-05	3	3	2293	223951
[OVER]	GO:0050377	UDP-glucose 4,6-dehydratase activity	MOLECULAR_FUNCTION	0.000279867	2.04024e-05	3	3	2293	223951
[OVER]	GO:0010280	UDP-L-rhamnose synthase activity	MOLECULAR_FUNCTION	0.000279867	2.04024e-05	3	3	2293	223951
[OVER]	GO:0030599	pectinesterase activity	MOLECULAR_FUNCTION	0.00028817	2.10312e-05	10	173	2286	223781
[UNDER]	GO:0003735	structural constituent of ribosome	MOLECULAR_FUNCTION	0.000290987	2.12605e-05	9	2883	2287	221071
[OVER]	GO:0042542	response to hydrogen peroxide	BIOLOGICAL_PROCESS	0.000296912	2.17418e-05	18	537	2278	223417
[OVER]	GO:0016174	NAD(P)H oxidase H2O2-forming activity	MOLECULAR_FUNCTION	0.000310451	2.28343e-05	6	50	2290	223904
[OVER]	GO:0052852	very-long-chain-(S)-2-hydroxy-acid oxidase activity	MOLECULAR_FUNCTION	0.000310451	2.28343e-05	6	50	2290	223904
[OVER]	GO:0052853	long-chain-(S)-2-hydroxy-long-chain-acid oxidase activity	MOLECULAR_FUNCTION	0.000310451	2.28343e-05	6	50	2290	223904
[OVER]	GO:0052854	medium-chain-(S)-2-hydroxy-acid oxidase activity	MOLECULAR_FUNCTION	0.000310451	2.28343e-05	6	50	2290	223904
[OVER]	GO:0006857	oligopeptide transport	BIOLOGICAL_PROCESS	0.000329388	2.42809e-05	14	345	2282	223609
[OVER]	GO:0033772	flavonoid 3',5'-hydroxylase activity	MOLECULAR_FUNCTION	0.000342348	2.53014e-05	6	51	2290	223903
[OVER]	GO:0004040	amidase activity	MOLECULAR_FUNCTION	0.000366953	2.71994e-05	7	78	2289	223876
[OVER]	GO:0009649	entrainment of circadian clock	BIOLOGICAL_PROCESS	0.000388069	2.88911e-05	4	14	2292	223940
[OVER]	GO:0055129	L-proline biosynthetic process	BIOLOGICAL_PROCESS	0.000388069	2.88911e-05	4	14	2292	223940
[OVER]	GO:0018822	nitrile hydratase activity	MOLECULAR_FUNCTION	0.000388069	2.88911e-05	4	14	2292	223940
[OVER]	GO:0080061	indole-3-acetonitrile nitrilase activity	MOLECULAR_FUNCTION	0.000388069	2.88911e-05	4	14	2292	223940
[OVER]	GO:0080153	negative regulation of reductive pentose-phosphate cycle	BIOLOGICAL_PROCESS	0.000465754	3.54333e-05	3	4	2293	223950
[OVER]	GO:0010311	lateral root formation	BIOLOGICAL_PROCESS	0.000465754	3.52832e-05	9	147	2287	223807
[OVER]	GO:0052841	inositol bisdiphosphate tetrakisphosphate diphosphatase activity	MOLECULAR_FUNCTION	0.000465754	3.54333e-05	3	4	2293	223950
[OVER]	GO:0052842	inositol diphosphate pentakisphosphate diphosphatase activity	MOLECULAR_FUNCTION	0.000465754	3.54333e-05	3	4	2293	223950
[OVER]	GO:0030553	cGMP binding	MOLECULAR_FUNCTION	0.000467648	3.56535e-05	5	32	2291	223922
[OVER]	GO:0080043	quercetin 3-O-glucosyltransferase activity	MOLECULAR_FUNCTION	0.000467648	3.56535e-05	5	32	2291	223922
[OVER]	GO:0009821	alkaloid biosynthetic process	BIOLOGICAL_PROCESS	0.000474608	3.63002e-05	4	15	2292	223939
[OVER]	GO:0004594	pantothenate kinase activity	MOLECULAR_FUNCTION	0.000474608	3.63002e-05	4	15	2292	223939
[OVER]	GO:0004765	shikimate kinase activity	MOLECULAR_FUNCTION	0.000474608	3.63002e-05	4	15	2292	223939
[UNDER]	GO:0015074	DNA integration	BIOLOGICAL_PROCESS	0.000481839	3.68925e-05	2	1575	2294	222379
[OVER]	GO:0015996	chlorophyll catabolic process	BIOLOGICAL_PROCESS	0.000493322	3.7852e-05	14	360	2282	223594
[OVER]	GO:0010498	proteasomal protein catabolic process	BIOLOGICAL_PROCESS	0.000519102	3.99147e-05	24	901	2272	223053
[OVER]	GO:0050356	tropine dehydrogenase activity	MOLECULAR_FUNCTION	0.000527792	4.07118e-05	5	33	2291	223921
[OVER]	GO:0004335	galactokinase activity	MOLECULAR_FUNCTION	0.000527792	4.07118e-05	5	33	2291	223921
[OVER]	GO:0005774	vacuolar membrane	CELLULAR_COMPONENT	0.000536905	4.14585e-05	46	2299	2250	221655
[OVER]	GO:0019544	arginine catabolic process to glutamate	BIOLOGICAL_PROCESS	0.000578617	4.50093e-05	4	16	2292	223938
[OVER]	GO:0048833	specification of floral organ number	BIOLOGICAL_PROCESS	0.000578617	4.50093e-05	4	16	2292	223938
[OVER]	GO:0004812	aminoacyl-tRNA ligase activity	MOLECULAR_FUNCTION	0.000578617	4.49106e-05	14	366	2282	223588
[OVER]	GO:0000293	ferric-chelate reductase activity	MOLECULAR_FUNCTION	0.000593448	4.6308e-05	5	34	2291	223920
[OVER]	GO:0004311	farnesyltranstransferase activity	MOLECULAR_FUNCTION	0.000593448	4.6308e-05	5	34	2291	223920
[OVER]	GO:0006816	calcium ion transport	BIOLOGICAL_PROCESS	0.00060752	4.76535e-05	19	626	2277	223328
[OVER]	GO:0010193	response to ozone	BIOLOGICAL_PROCESS	0.00061559	4.84369e-05	8	118	2288	223836
[OVER]	GO:0015417	ATPase-coupled polyamine transmembrane transporter activity	MOLECULAR_FUNCTION	0.000624791	4.92118e-05	6	58	2290	223896
[OVER]	GO:0009739	response to gibberellin	BIOLOGICAL_PROCESS	0.000698547	5.54195e-05	13	326	2283	223628
[OVER]	GO:0033542	fatty acid beta-oxidation, unsaturated, even number	BIOLOGICAL_PROCESS	0.000707004	5.62632e-05	3	5	2293	223949
[OVER]	GO:0008460	dTDP-glucose 4,6-dehydratase activity	MOLECULAR_FUNCTION	0.000707004	5.62632e-05	3	5	2293	223949
[OVER]	GO:0004499	N,N-dimethylaniline monooxygenase activity	MOLECULAR_FUNCTION	0.000795604	6.38324e-05	6	61	2290	223893
[OVER]	GO:0010252	auxin homeostasis	BIOLOGICAL_PROCESS	0.000862487	6.94093e-05	6	62	2290	223892
[OVER]	GO:0045893	positive regulation of transcription, DNA-templated	BIOLOGICAL_PROCESS	0.000910677	7.40291e-05	37	1758	2259	222196
[OVER]	GO:0030552	cAMP binding	MOLECULAR_FUNCTION	0.000920019	7.48635e-05	5	38	2291	223916
[OVER]	GO:0010118	stomatal movement	BIOLOGICAL_PROCESS	0.000967458	7.90389e-05	15	437	2281	223517
[OVER]	GO:0008442	3-hydroxyisobutyrate dehydrogenase activity	MOLECULAR_FUNCTION	0.000980806	8.02892e-05	4	19	2292	223935
[OVER]	GO:0048573	photoperiodism, flowering	BIOLOGICAL_PROCESS	0.000983657	8.06027e-05	18	597	2278	223357
[OVER]	GO:0006560	proline metabolic process	BIOLOGICAL_PROCESS	0.000996386	8.17268e-05	6	64	2290	223890
[OVER]	GO:0032580	Golgi cisterna membrane	CELLULAR_COMPONENT	0.0010201	8.37553e-05	5	39	2291	223915
[OVER]	GO:0043086	negative regulation of catalytic activity	BIOLOGICAL_PROCESS	0.00106378	8.82083e-05	14	391	2282	223563
[OVER]	GO:0046982	protein heterodimerization activity	MOLECULAR_FUNCTION	0.00107373	8.92087e-05	15	442	2281	223512
[OVER]	GO:0071365	cellular response to auxin stimulus	BIOLOGICAL_PROCESS	0.00108486	9.03183e-05	17	548	2279	223406
[OVER]	GO:0004252	serine-type endopeptidase activity	MOLECULAR_FUNCTION	0.00114077	9.5335e-05	16	497	2280	223457
[OVER]	GO:0015706	nitrate transport	BIOLOGICAL_PROCESS	0.00116855	9.77521e-05	14	395	2282	223559
[OVER]	GO:0045330	aspartyl esterase activity	MOLECULAR_FUNCTION	0.00121064	0.000101669	8	132	2288	223822
[OVER]	GO:0004657	proline dehydrogenase activity	MOLECULAR_FUNCTION	0.00121751	0.000102939	2	0	2294	223954
[OVER]	GO:0004334	fumarylacetoacetase activity	MOLECULAR_FUNCTION	0.00121751	0.000102939	2	0	2294	223954
[OVER]	GO:0016710	trans-cinnamate 4-monooxygenase activity	MOLECULAR_FUNCTION	0.00121751	0.000102939	2	0	2294	223954
[OVER]	GO:0009086	methionine biosynthetic process	BIOLOGICAL_PROCESS	0.00125684	0.000106783	17	556	2279	223398
[OVER]	GO:0050665	hydrogen peroxide biosynthetic process	BIOLOGICAL_PROCESS	0.00128914	0.00010973	13	350	2283	223604
[OVER]	GO:0045491	xylan metabolic process	BIOLOGICAL_PROCESS	0.00135858	0.000116415	19	672	2277	223282
[OVER]	GO:0071454	cellular response to anoxia	BIOLOGICAL_PROCESS	0.00137919	0.000118743	3	7	2293	223947
[OVER]	GO:0045300	acyl-[acyl-carrier-protein] desaturase activity	MOLECULAR_FUNCTION	0.00137919	0.000118743	3	7	2293	223947
[OVER]	GO:0033989	3alpha,7alpha,12alpha-trihydroxy-5beta-cholest-24-enoyl-CoA hydratase activity	MOLECULAR_FUNCTION	0.00137919	0.000118743	3	7	2293	223947
[OVER]	GO:0045735	nutrient reservoir activity	MOLECULAR_FUNCTION	0.00143464	0.000123633	8	136	2288	223818
[OVER]	GO:0001708	cell fate specification	BIOLOGICAL_PROCESS	0.00145609	0.000125673	9	175	2287	223779
[OVER]	GO:1902047	polyamine transmembrane transport	BIOLOGICAL_PROCESS	0.00149605	0.000129413	6	70	2290	223884
[OVER]	GO:0005543	phospholipid binding	MOLECULAR_FUNCTION	0.00149651	0.000129819	15	458	2281	223496
[OVER]	GO:0003841	1-acylglycerol-3-phosphate O-acyltransferase activity	MOLECULAR_FUNCTION	0.00152376	0.000132306	4	22	2292	223932
[OVER]	GO:0045927	positive regulation of growth	BIOLOGICAL_PROCESS	0.00161959	0.000141023	5	44	2291	223910
[OVER]	GO:0080092	regulation of pollen tube growth	BIOLOGICAL_PROCESS	0.00170841	0.000149453	6	72	2290	223882
[OVER]	GO:0045486	naringenin 3-dioxygenase activity	MOLECULAR_FUNCTION	0.00175625	0.000154067	4	23	2292	223931
[OVER]	GO:0010100	negative regulation of photomorphogenesis	BIOLOGICAL_PROCESS	0.00176798	0.000155384	5	45	2291	223909
[OVER]	GO:0015439	ATPase-coupled heme transmembrane transporter activity	MOLECULAR_FUNCTION	0.00181777	0.000160353	6	73	2290	223881
[OVER]	GO:0006680	glucosylceramide catabolic process	BIOLOGICAL_PROCESS	0.00182338	0.000162035	3	8	2293	223946
[OVER]	GO:2001142	nicotinate transport	BIOLOGICAL_PROCESS	0.00182338	0.000162035	3	8	2293	223946
[OVER]	GO:2001143	N-methylnicotinate transport	BIOLOGICAL_PROCESS	0.00182338	0.000162035	3	8	2293	223946
[OVER]	GO:0090416	nicotinate transmembrane transporter activity	MOLECULAR_FUNCTION	0.00182338	0.000162035	3	8	2293	223946
[OVER]	GO:0090417	N-methylnicotinate transmembrane transporter activity	MOLECULAR_FUNCTION	0.00182338	0.000162035	3	8	2293	223946
[OVER]	GO:0004348	glucosylceramidase activity	MOLECULAR_FUNCTION	0.00182338	0.000162035	3	8	2293	223946
[OVER]	GO:0006623	protein targeting to vacuole	BIOLOGICAL_PROCESS	0.00183563	0.000163423	16	522	2280	223432
[OVER]	GO:0031667	response to nutrient levels	BIOLOGICAL_PROCESS	0.00189704	0.000169044	28	1230	2268	222724
[OVER]	GO:0070084	protein initiator methionine removal	BIOLOGICAL_PROCESS	0.00199179	0.000178299	4	24	2292	223930
[OVER]	GO:0046654	tetrahydrofolate biosynthetic process	BIOLOGICAL_PROCESS	0.00208814	0.000187434	5	47	2291	223907
[OVER]	GO:0033773	isoflavone 2'-hydroxylase activity	MOLECULAR_FUNCTION	0.00208814	0.000187434	5	47	2291	223907
[UNDER]	GO:0006260	DNA replication	BIOLOGICAL_PROCESS	0.00214664	0.00019286	2	1349	2294	222605
[OVER]	GO:0019632	shikimate metabolic process	BIOLOGICAL_PROCESS	0.00226994	0.000205165	4	25	2292	223929
[OVER]	GO:0070006	metalloaminopeptidase activity	MOLECULAR_FUNCTION	0.00226994	0.000205165	4	25	2292	223929
[OVER]	GO:0032352	positive regulation of hormone metabolic process	BIOLOGICAL_PROCESS	0.00236083	0.000214411	3	9	2293	223945
[OVER]	GO:0004452	isopentenyl-diphosphate delta-isomerase activity	MOLECULAR_FUNCTION	0.00236083	0.000214411	3	9	2293	223945
[OVER]	GO:0010279	indole-3-acetic acid amido synthetase activity	MOLECULAR_FUNCTION	0.00236083	0.000214411	3	9	2293	223945
[OVER]	GO:0016682	oxidoreductase activity, acting on diphenols and related substances as donors, oxygen as acceptor	MOLECULAR_FUNCTION	0.00247958	0.000225802	9	190	2287	223764
[OVER]	GO:0006418	tRNA aminoacylation for protein translation	BIOLOGICAL_PROCESS	0.00248918	0.000226878	12	328	2284	223626
[OVER]	GO:0009554	megasporogenesis	BIOLOGICAL_PROCESS	0.00257408	0.000234827	4	26	2292	223928
[OVER]	GO:0007178	transmembrane receptor protein serine/threonine kinase signaling pathway	BIOLOGICAL_PROCESS	0.00264333	0.000242005	11	282	2285	223672
[OVER]	GO:0004707	MAP kinase activity	MOLECULAR_FUNCTION	0.00266759	0.000244661	5	50	2291	223904
[OVER]	GO:0009854	oxidative photosynthetic carbon pathway	BIOLOGICAL_PROCESS	0.00289443	0.000266409	5	51	2291	223903
[OVER]	GO:0002758	innate immune response-activating signal transduction	BIOLOGICAL_PROCESS	0.00289709	0.00026689	7	115	2289	223839
[OVER]	GO:0009423	chorismate biosynthetic process	BIOLOGICAL_PROCESS	0.00289805	0.00026745	4	27	2292	223927
[OVER]	GO:0047763	caffeate O-methyltransferase activity	MOLECULAR_FUNCTION	0.00289805	0.00026745	4	27	2292	223927
[OVER]	GO:0048571	long-day photoperiodism	BIOLOGICAL_PROCESS	0.0029445	0.000271977	6	81	2290	223873
[OVER]	GO:0000900	translation repressor activity, mRNA regulatory element binding	MOLECULAR_FUNCTION	0.00298693	0.000276626	3	10	2293	223944
[OVER]	GO:0047012	sterol-4-alpha-carboxylate 3-dehydrogenase (decarboxylating) activity	MOLECULAR_FUNCTION	0.00298693	0.000276626	3	10	2293	223944
[OVER]	GO:0006633	fatty acid biosynthetic process	BIOLOGICAL_PROCESS	0.00308455	0.000285918	22	876	2274	223078
[OVER]	GO:0006020	inositol metabolic process	BIOLOGICAL_PROCESS	0.00311597	0.000289592	5	52	2291	223902
[OVER]	GO:0016602	CCAAT-binding factor complex	CELLULAR_COMPONENT	0.00311597	0.000289592	5	52	2291	223902
[OVER]	GO:0019725	cellular homeostasis	BIOLOGICAL_PROCESS	0.00314433	0.00029274	32	1524	2264	222430
[OVER]	GO:0009788	negative regulation of abscisic acid-activated signaling pathway	BIOLOGICAL_PROCESS	0.00321743	0.000300332	8	156	2288	223798
[OVER]	GO:0045792	negative regulation of cell size	BIOLOGICAL_PROCESS	0.00324072	0.000306729	2	1	2294	223953
[OVER]	GO:1901183	positive regulation of camalexin biosynthetic process	BIOLOGICAL_PROCESS	0.00324072	0.000306729	2	1	2294	223953
[OVER]	GO:0034053	modulation by symbiont of host defense-related programmed cell death	BIOLOGICAL_PROCESS	0.00324072	0.000306729	2	1	2294	223953
[OVER]	GO:0097185	cellular response to azide	BIOLOGICAL_PROCESS	0.00324072	0.000306729	2	1	2294	223953
[OVER]	GO:0052597	diamine oxidase activity	MOLECULAR_FUNCTION	0.00324072	0.000306729	2	1	2294	223953
[OVER]	GO:0008936	nicotinamidase activity	MOLECULAR_FUNCTION	0.00324072	0.000306729	2	1	2294	223953
[OVER]	GO:0047890	flavanone 4-reductase activity	MOLECULAR_FUNCTION	0.00324072	0.000306729	2	1	2294	223953
[OVER]	GO:0015886	heme transport	BIOLOGICAL_PROCESS	0.00324491	0.000307654	6	83	2290	223871
[OVER]	GO:0004675	transmembrane receptor protein serine/threonine kinase activity	MOLECULAR_FUNCTION	0.00329637	0.000312802	11	291	2285	223663
[OVER]	GO:0046364	monosaccharide biosynthetic process	BIOLOGICAL_PROCESS	0.00333311	0.000316832	20	790	2276	223164
[OVER]	GO:0010253	UDP-rhamnose biosynthetic process	BIOLOGICAL_PROCESS	0.00366325	0.000349407	3	11	2293	223943
[OVER]	GO:0010178	IAA-amino acid conjugate hydrolase activity	MOLECULAR_FUNCTION	0.00366325	0.000349407	3	11	2293	223943
[OVER]	GO:0008287	protein serine/threonine phosphatase complex	CELLULAR_COMPONENT	0.00384067	0.000367268	8	161	2288	223793
[OVER]	GO:0030247	polysaccharide binding	MOLECULAR_FUNCTION	0.00385639	0.000369085	11	297	2285	223657
[OVER]	GO:0070417	cellular response to cold	BIOLOGICAL_PROCESS	0.00391094	0.000374624	7	122	2289	223832
[OVER]	GO:0010114	response to red light	BIOLOGICAL_PROCESS	0.00404969	0.000389235	13	401	2283	223553
[OVER]	GO:0010093	specification of floral organ identity	BIOLOGICAL_PROCESS	0.00405028	0.000389952	6	87	2290	223867
[OVER]	GO:0009094	L-phenylalanine biosynthetic process	BIOLOGICAL_PROCESS	0.00445718	0.000430942	4	31	2292	223923
[OVER]	GO:0004420	hydroxymethylglutaryl-CoA reductase (NADPH) activity	MOLECULAR_FUNCTION	0.00447371	0.000433457	3	12	2293	223942
[OVER]	GO:0017040	N-acylsphingosine amidohydrolase activity	MOLECULAR_FUNCTION	0.00447371	0.000433457	3	12	2293	223942
[OVER]	GO:0003899	DNA-directed 5'-3' RNA polymerase activity	MOLECULAR_FUNCTION	0.00447371	0.000433633	11	303	2285	223651
[OVER]	GO:0005654	nucleoplasm	CELLULAR_COMPONENT	0.00475061	0.000461247	21	854	2275	223100
[OVER]	GO:0052692	raffinose alpha-galactosidase activity	MOLECULAR_FUNCTION	0.00475806	0.000462358	5	58	2291	223896
[OVER]	GO:0010017	red or far-red light signaling pathway	BIOLOGICAL_PROCESS	0.00483082	0.000469821	9	211	2287	223743
[OVER]	GO:0034605	cellular response to heat	BIOLOGICAL_PROCESS	0.00483851	0.000470963	7	127	2289	223827
[OVER]	GO:0009877	nodulation	BIOLOGICAL_PROCESS	0.00493257	0.000480922	4	32	2292	223922
[OVER]	GO:0010166	wax metabolic process	BIOLOGICAL_PROCESS	0.00500199	0.000488506	6	91	2290	223863
[OVER]	GO:0009625	response to insect	BIOLOGICAL_PROCESS	0.00507582	0.00049737	5	59	2291	223895
[OVER]	GO:0004602	glutathione peroxidase activity	MOLECULAR_FUNCTION	0.00507582	0.00049737	5	59	2291	223895
[OVER]	GO:0004197	cysteine-type endopeptidase activity	MOLECULAR_FUNCTION	0.00524751	0.000514621	7	129	2289	223825
[OVER]	GO:0009505	plant-type cell wall	CELLULAR_COMPONENT	0.00527508	0.000518614	19	761	2277	223193
[OVER]	GO:0010188	response to microbial phytotoxin	BIOLOGICAL_PROCESS	0.0053543	0.000529455	3	13	2293	223941
[OVER]	GO:0003992	N2-acetyl-L-ornithine:2-oxoglutarate 5-aminotransferase activity	MOLECULAR_FUNCTION	0.0053543	0.000529455	3	13	2293	223941
[OVER]	GO:0004755	saccharopine dehydrogenase (NADP+, L-glutamate-forming) activity	MOLECULAR_FUNCTION	0.0053543	0.000529455	3	13	2293	223941
[OVER]	GO:0010162	seed dormancy process	BIOLOGICAL_PROCESS	0.00537832	0.000532707	15	526	2281	223428
[OVER]	GO:0001653	peptide receptor activity	MOLECULAR_FUNCTION	0.00556392	0.000552449	10	263	2286	223691
[OVER]	GO:0010043	response to zinc ion	BIOLOGICAL_PROCESS	0.0056452	0.000561439	7	131	2289	223823
[OVER]	GO:0019031	viral envelope	CELLULAR_COMPONENT	0.0059434	0.000593033	4	34	2292	223920
[OVER]	GO:0015966	diadenosine tetraphosphate biosynthetic process	BIOLOGICAL_PROCESS	0.0060867	0.000609315	2	2	2294	223952
[OVER]	GO:0004107	chorismate synthase activity	MOLECULAR_FUNCTION	0.0060867	0.000609315	2	2	2294	223952
[OVER]	GO:0010077	maintenance of inflorescence meristem identity	BIOLOGICAL_PROCESS	0.00632747	0.000638056	3	14	2293	223940
[OVER]	GO:0009647	skotomorphogenesis	BIOLOGICAL_PROCESS	0.00632747	0.000638056	3	14	2293	223940
[OVER]	GO:0047130	saccharopine dehydrogenase (NADP+, L-lysine-forming) activity	MOLECULAR_FUNCTION	0.00632747	0.000638056	3	14	2293	223940
[OVER]	GO:0043295	glutathione binding	MOLECULAR_FUNCTION	0.00632747	0.000638056	3	14	2293	223940
[OVER]	GO:0030976	thiamine pyrophosphate binding	MOLECULAR_FUNCTION	0.00651152	0.000657675	5	63	2291	223891
[OVER]	GO:0030243	cellulose metabolic process	BIOLOGICAL_PROCESS	0.00662318	0.000670032	20	817	2276	223137
[OVER]	GO:0006094	gluconeogenesis	BIOLOGICAL_PROCESS	0.00675547	0.000685066	18	718	2278	223236
[OVER]	GO:0009084	glutamine family amino acid biosynthetic process	BIOLOGICAL_PROCESS	0.00676573	0.000686658	9	223	2287	223731
[OVER]	GO:0047372	acylglycerol lipase activity	MOLECULAR_FUNCTION	0.00711338	0.00072252	4	36	2292	223918
[OVER]	GO:0048193	Golgi vesicle transport	BIOLOGICAL_PROCESS	0.00726288	0.000738889	30	1495	2266	222459
[OVER]	GO:0003713	transcription coactivator activity	MOLECULAR_FUNCTION	0.00729707	0.000742962	6	99	2290	223855
[OVER]	GO:0032880	regulation of protein localization	BIOLOGICAL_PROCESS	0.00737988	0.000751993	9	226	2287	223728
[UNDER]	GO:0097549	chromatin organization involved in negative regulation of transcription	BIOLOGICAL_PROCESS	0.00742476	0.000757888	2	1197	2294	222757
[OVER]	GO:0040009	regulation of growth rate	BIOLOGICAL_PROCESS	0.00743359	0.000759889	3	15	2293	223939
[UNDER]	GO:0015934	large ribosomal subunit	CELLULAR_COMPONENT	0.00790857	0.000809731	0	763	2296	223191
[OVER]	GO:0006486	protein glycosylation	BIOLOGICAL_PROCESS	0.0079272	0.00081293	26	1205	2270	222749
[OVER]	GO:0009845	seed germination	BIOLOGICAL_PROCESS	0.00796529	0.000817485	20	840	2276	223114
[OVER]	GO:0050590	desacetoxyvindoline 4-hydroxylase activity	MOLECULAR_FUNCTION	0.00843126	0.000870803	4	38	2292	223916
[OVER]	GO:0004623	phospholipase A2 activity	MOLECULAR_FUNCTION	0.00865733	0.000895562	3	16	2293	223938
[OVER]	GO:0050269	coniferyl-aldehyde dehydrogenase activity	MOLECULAR_FUNCTION	0.00865733	0.000895562	3	16	2293	223938
[OVER]	GO:0006863	purine nucleobase transport	BIOLOGICAL_PROCESS	0.00906233	0.000938195	8	187	2288	223767
[OVER]	GO:0070592	cell wall polysaccharide biosynthetic process	BIOLOGICAL_PROCESS	0.00924116	0.000957461	16	618	2280	223336
[OVER]	GO:0048544	recognition of pollen	BIOLOGICAL_PROCESS	0.00924869	0.000958995	11	335	2285	223619
[OVER]	GO:0050897	cobalt ion binding	MOLECULAR_FUNCTION	0.00934298	0.000969533	8	188	2288	223766
[OVER]	GO:0034263	positive regulation of autophagy in response to ER overload	BIOLOGICAL_PROCESS	0.00967458	0.00100867	2	3	2294	223951
[OVER]	GO:0015742	alpha-ketoglutarate transport	BIOLOGICAL_PROCESS	0.00967458	0.00100867	2	3	2294	223951
[OVER]	GO:0043394	proteoglycan binding	MOLECULAR_FUNCTION	0.00967458	0.00100867	2	3	2294	223951
[OVER]	GO:0034655	nucleobase-containing compound catabolic process	BIOLOGICAL_PROCESS	0.00991458	0.00103612	23	1050	2273	222904
[OVER]	GO:0009645	response to low light intensity stimulus	BIOLOGICAL_PROCESS	0.00998255	0.00104566	3	17	2293	223937
[OVER]	GO:0009450	gamma-aminobutyric acid catabolic process	BIOLOGICAL_PROCESS	0.00998255	0.00104566	3	17	2293	223937
[OVER]	GO:0008831	dTDP-4-dehydrorhamnose reductase activity	MOLECULAR_FUNCTION	0.00998255	0.00104566	3	17	2293	223937

## Sheet: TransM15_EnrichGO
Table S14 Gene ontology (GO) enrichment analysis of transcript modules sharing high correlation coefficient (PCC > 0.7) with the identified metabolite modules in Mallotus japonicus.
Tags	GO ID	GO Name	GO Category	FDR	P-Value	Nr Test	Nr Reference	Non Annot Test	Non Annot Reference
[OVER]	GO:0016021	integral component of membrane	CELLULAR_COMPONENT	4.09863e-39	1.46892e-41	260	11368	1752	212870
[OVER]	GO:0055114	oxidation-reduction process	BIOLOGICAL_PROCESS	3.07438e-30	1.45242e-32	207	9115	1805	215123
[OVER]	GO:0003700	DNA-binding transcription factor activity	MOLECULAR_FUNCTION	8.13249e-24	6.69041e-26	90	2600	1922	221638
[OVER]	GO:0003735	structural constituent of ribosome	MOLECULAR_FUNCTION	6.74101e-23	6.31438e-25	92	2800	1920	221438
[OVER]	GO:0006068	ethanol catabolic process	BIOLOGICAL_PROCESS	8.93501e-21	9.67954e-23	24	128	1988	224110
[OVER]	GO:0006567	threonine catabolic process	BIOLOGICAL_PROCESS	2.57596e-15	3.71382e-17	19	119	1993	224119
[OVER]	GO:0009744	response to sucrose	BIOLOGICAL_PROCESS	1.58304e-13	2.48861e-15	36	740	1976	223498
[OVER]	GO:0048046	apoplast	CELLULAR_COMPONENT	8.8218e-12	1.58084e-13	44	1259	1968	222979
[OVER]	GO:0000786	nucleosome	CELLULAR_COMPONENT	2.69621e-11	4.96329e-13	21	273	1991	223965
[OVER]	GO:0008270	zinc ion binding	MOLECULAR_FUNCTION	5.61371e-11	1.07455e-12	114	6077	1898	218161
[OVER]	GO:0051980	iron-nicotianamine transmembrane transporter activity	MOLECULAR_FUNCTION	7.12283e-11	1.39242e-12	7	4	2005	224234
[OVER]	GO:0005524	ATP binding	MOLECULAR_FUNCTION	1.19667e-10	2.39782e-12	169	10593	1843	213645
[OVER]	GO:0003924	GTPase activity	MOLECULAR_FUNCTION	1.36823e-10	2.76387e-12	36	950	1976	223288
[OVER]	GO:0006414	translational elongation	BIOLOGICAL_PROCESS	1.49464e-10	3.04357e-12	30	665	1982	223573
[OVER]	GO:0046982	protein heterodimerization activity	MOLECULAR_FUNCTION	3.77921e-10	8.06512e-12	24	433	1988	223805
[OVER]	GO:0004029	aldehyde dehydrogenase (NAD+) activity	MOLECULAR_FUNCTION	4.87472e-10	1.06412e-11	18	223	1994	224015
[OVER]	GO:0043458	ethanol biosynthetic process involved in glucose fermentation to ethanol	BIOLOGICAL_PROCESS	5.22649e-10	1.1622e-11	10	37	2002	224201
[OVER]	GO:0005525	GTP binding	MOLECULAR_FUNCTION	7.46232e-10	1.68976e-11	45	1517	1967	222721
[OVER]	GO:0006334	nucleosome assembly	BIOLOGICAL_PROCESS	1.43434e-09	3.34139e-11	16	178	1996	224060
[OVER]	GO:0043090	amino acid import	BIOLOGICAL_PROCESS	1.62857e-09	3.82039e-11	21	349	1991	223889
[OVER]	GO:0009750	response to fructose	BIOLOGICAL_PROCESS	2.15557e-09	5.12688e-11	24	476	1988	223762
[OVER]	GO:0035524	proline transmembrane transport	BIOLOGICAL_PROCESS	2.19057e-09	5.22795e-11	8	18	2004	224220
[OVER]	GO:0009535	chloroplast thylakoid membrane	CELLULAR_COMPONENT	2.40305e-09	5.75464e-11	46	1638	1966	222600
[OVER]	GO:0043565	sequence-specific DNA binding	MOLECULAR_FUNCTION	2.57181e-09	6.2635e-11	41	1347	1971	222891
[OVER]	GO:0015193	L-proline transmembrane transporter activity	MOLECULAR_FUNCTION	3.00636e-09	7.37081e-11	8	19	2004	224219
[OVER]	GO:0033214	siderophore-dependent iron import into cell	BIOLOGICAL_PROCESS	3.99897e-09	9.99986e-11	6	4	2006	224234
[OVER]	GO:0004022	alcohol dehydrogenase (NAD+) activity	MOLECULAR_FUNCTION	6.42635e-09	1.65932e-10	16	200	1996	224038
[OVER]	GO:0005509	calcium ion binding	MOLECULAR_FUNCTION	6.62843e-09	1.7169e-10	34	1000	1978	223238
[OVER]	GO:0010363	regulation of plant-type hypersensitive response	BIOLOGICAL_PROCESS	7.48174e-09	1.94402e-10	34	1005	1978	223233
[OVER]	GO:0003746	translation elongation factor activity	MOLECULAR_FUNCTION	7.66395e-09	2.01009e-10	24	511	1988	223727
[OVER]	GO:0015706	nitrate transport	BIOLOGICAL_PROCESS	9.0001e-09	2.38986e-10	21	388	1991	223850
[OVER]	GO:0015716	organic phosphonate transport	BIOLOGICAL_PROCESS	1.1101e-08	3.02909e-10	16	209	1996	224029
[OVER]	GO:0015416	ATPase-coupled organic phosphonate transmembrane transporter activity	MOLECULAR_FUNCTION	1.1101e-08	3.02909e-10	16	209	1996	224029
[OVER]	GO:0009407	toxin catabolic process	BIOLOGICAL_PROCESS	1.44846e-08	3.97599e-10	23	485	1989	223753
[OVER]	GO:0047458	beta-pyrazolylalanine synthase activity	MOLECULAR_FUNCTION	1.58754e-08	4.39655e-10	8	25	2004	224213
[OVER]	GO:0006612	protein targeting to membrane	BIOLOGICAL_PROCESS	2.83339e-08	8.23916e-10	35	1122	1977	223116
[OVER]	GO:0010167	response to nitrate	BIOLOGICAL_PROCESS	3.32696e-08	9.75567e-10	19	339	1993	223899
[OVER]	GO:0009637	response to blue light	BIOLOGICAL_PROCESS	3.38906e-08	9.9654e-10	23	510	1989	223728
[OVER]	GO:0004124	cysteine synthase activity	MOLECULAR_FUNCTION	2.32271e-07	7.28389e-09	10	78	2002	224160
[OVER]	GO:0004674	protein serine/threonine kinase activity	MOLECULAR_FUNCTION	6.94797e-07	2.22412e-08	72	3838	1940	220400
[OVER]	GO:0006535	cysteine biosynthetic process from serine	BIOLOGICAL_PROCESS	7.88453e-07	2.53677e-08	10	90	2002	224148
[OVER]	GO:0030246	carbohydrate binding	MOLECULAR_FUNCTION	9.31958e-07	3.02884e-08	31	1060	1981	223178
[OVER]	GO:0002215	defense response to nematode	BIOLOGICAL_PROCESS	9.50125e-07	3.09563e-08	4	1	2008	224237
[OVER]	GO:0009439	cyanate metabolic process	BIOLOGICAL_PROCESS	9.87664e-07	3.24207e-08	8	47	2004	224191
[OVER]	GO:0008824	cyanate hydratase activity	MOLECULAR_FUNCTION	9.87664e-07	3.24207e-08	8	47	2004	224191
[OVER]	GO:0006816	calcium ion transport	BIOLOGICAL_PROCESS	1.02943e-06	3.40434e-08	23	622	1989	223616
[OVER]	GO:0020037	heme binding	MOLECULAR_FUNCTION	1.07383e-06	3.55992e-08	35	1311	1977	222927
[OVER]	GO:0035673	oligopeptide transmembrane transporter activity	MOLECULAR_FUNCTION	1.21316e-06	4.06133e-08	10	95	2002	224143
[OVER]	GO:0022627	cytosolic small ribosomal subunit	CELLULAR_COMPONENT	2.42242e-06	8.38583e-08	19	454	1993	223784
[OVER]	GO:0006366	transcription by RNA polymerase II	BIOLOGICAL_PROCESS	2.64607e-06	9.20318e-08	23	659	1989	223579
[OVER]	GO:0009739	response to gibberellin	BIOLOGICAL_PROCESS	2.87444e-06	1.00209e-07	16	323	1996	223915
[OVER]	GO:0050832	defense response to fungus	BIOLOGICAL_PROCESS	3.30175e-06	1.15643e-07	30	1068	1982	223170
[OVER]	GO:0045991	carbon catabolite activation of transcription	BIOLOGICAL_PROCESS	3.55635e-06	1.2514e-07	7	37	2005	224201
[OVER]	GO:0019413	acetate biosynthetic process	BIOLOGICAL_PROCESS	3.55635e-06	1.2514e-07	7	37	2005	224201
[OVER]	GO:0010295	(+)-abscisic acid 8'-hydroxylase activity	MOLECULAR_FUNCTION	4.39448e-06	1.56422e-07	6	22	2006	224216
[OVER]	GO:0015795	sorbitol transport	BIOLOGICAL_PROCESS	5.90703e-06	2.13629e-07	4	3	2008	224235
[OVER]	GO:0015753	D-xylose transmembrane transport	BIOLOGICAL_PROCESS	5.90703e-06	2.13629e-07	4	3	2008	224235
[OVER]	GO:0015752	D-ribose transmembrane transport	BIOLOGICAL_PROCESS	5.90703e-06	2.13629e-07	4	3	2008	224235
[OVER]	GO:0046187	acetaldehyde catabolic process	BIOLOGICAL_PROCESS	7.34605e-06	2.6986e-07	7	42	2005	224196
[OVER]	GO:0022625	cytosolic large ribosomal subunit	CELLULAR_COMPONENT	7.63188e-06	2.80982e-07	19	493	1993	223745
[OVER]	GO:0004601	peroxidase activity	MOLECULAR_FUNCTION	8.13521e-06	3.00175e-07	22	652	1990	223586
[OVER]	GO:1900425	negative regulation of defense response to bacterium	BIOLOGICAL_PROCESS	9.7836e-06	3.64982e-07	6	26	2006	224212
[OVER]	GO:0006352	DNA-templated transcription, initiation	BIOLOGICAL_PROCESS	1.229e-05	4.66494e-07	15	319	1997	223919
[OVER]	GO:0009765	photosynthesis, light harvesting	BIOLOGICAL_PROCESS	1.52044e-05	5.83306e-07	15	325	1997	223913
[OVER]	GO:0009697	salicylic acid biosynthetic process	BIOLOGICAL_PROCESS	1.52076e-05	5.84669e-07	20	571	1992	223667
[OVER]	GO:0009099	valine biosynthetic process	BIOLOGICAL_PROCESS	1.65512e-05	6.39022e-07	6	29	2006	224209
[OVER]	GO:0071076	RNA 3' uridylation	BIOLOGICAL_PROCESS	1.8036e-05	7.02225e-07	3	0	2009	224238
[OVER]	GO:0046183	L-idonate catabolic process	BIOLOGICAL_PROCESS	1.91925e-05	7.58193e-07	4	5	2008	224233
[OVER]	GO:0015591	D-ribose transmembrane transporter activity	MOLECULAR_FUNCTION	1.91925e-05	7.58193e-07	4	5	2008	224233
[OVER]	GO:0015576	sorbitol transmembrane transporter activity	MOLECULAR_FUNCTION	1.91925e-05	7.58193e-07	4	5	2008	224233
[OVER]	GO:0015148	D-xylose transmembrane transporter activity	MOLECULAR_FUNCTION	1.91925e-05	7.58193e-07	4	5	2008	224233
[OVER]	GO:0009098	leucine biosynthetic process	BIOLOGICAL_PROCESS	1.92245e-05	7.61026e-07	6	30	2006	224208
[OVER]	GO:0019253	reductive pentose-phosphate cycle	BIOLOGICAL_PROCESS	2.07906e-05	8.26407e-07	9	103	2003	224135
[OVER]	GO:0008361	regulation of cell size	BIOLOGICAL_PROCESS	2.25753e-05	9.01027e-07	12	209	2000	224029
[OVER]	GO:0010287	plastoglobule	CELLULAR_COMPONENT	2.40307e-05	9.63027e-07	13	251	1999	223987
[OVER]	GO:0006468	protein phosphorylation	BIOLOGICAL_PROCESS	2.41759e-05	9.70818e-07	88	5603	1924	218635
[OVER]	GO:1902475	L-alpha-amino acid transmembrane transport	BIOLOGICAL_PROCESS	3.84225e-05	1.56795e-06	8	82	2004	224156
[OVER]	GO:1901000	regulation of response to salt stress	BIOLOGICAL_PROCESS	3.95431e-05	1.62978e-06	5	18	2007	224220
[OVER]	GO:0052654	L-leucine transaminase activity	MOLECULAR_FUNCTION	4.07957e-05	1.69137e-06	6	35	2006	224203
[OVER]	GO:0052655	L-valine transaminase activity	MOLECULAR_FUNCTION	4.07957e-05	1.69137e-06	6	35	2006	224203
[OVER]	GO:0052656	L-isoleucine transaminase activity	MOLECULAR_FUNCTION	4.07957e-05	1.69137e-06	6	35	2006	224203
[OVER]	GO:0015797	mannitol transport	BIOLOGICAL_PROCESS	4.65945e-05	1.95769e-06	4	7	2008	224231
[OVER]	GO:0008295	spermidine biosynthetic process	BIOLOGICAL_PROCESS	4.65945e-05	1.95836e-06	6	36	2006	224202
[OVER]	GO:0046345	abscisic acid catabolic process	BIOLOGICAL_PROCESS	4.82465e-05	2.04351e-06	5	19	2007	224219
[OVER]	GO:0001510	RNA methylation	BIOLOGICAL_PROCESS	4.93992e-05	2.10038e-06	24	856	1988	223382
[OVER]	GO:0048765	root hair cell differentiation	BIOLOGICAL_PROCESS	5.66523e-05	2.42262e-06	26	987	1986	223251
[OVER]	GO:0061025	membrane fusion	BIOLOGICAL_PROCESS	5.68079e-05	2.4339e-06	25	925	1987	223313
[OVER]	GO:0046109	uridine biosynthetic process	BIOLOGICAL_PROCESS	6.40284e-05	2.79019e-06	3	1	2009	224237
[OVER]	GO:0008117	sphinganine-1-phosphate aldolase activity	MOLECULAR_FUNCTION	6.40284e-05	2.79019e-06	3	1	2009	224237
[OVER]	GO:0042254	ribosome biogenesis	BIOLOGICAL_PROCESS	7.6331e-05	3.35118e-06	42	2074	1970	222164
[OVER]	GO:0015408	ATPase-coupled ferric iron transmembrane transporter activity	MOLECULAR_FUNCTION	7.6841e-05	3.39235e-06	6	40	2006	224198
[OVER]	GO:0042545	cell wall modification	BIOLOGICAL_PROCESS	7.75512e-05	3.43002e-06	24	882	1988	223356
[OVER]	GO:0042299	lupeol synthase activity	MOLECULAR_FUNCTION	8.48937e-05	3.79626e-06	5	22	2007	224216
[OVER]	GO:0003682	chromatin binding	MOLECULAR_FUNCTION	8.48937e-05	3.79089e-06	28	1142	1984	223096
[OVER]	GO:0043269	regulation of ion transport	BIOLOGICAL_PROCESS	8.59355e-05	3.87784e-06	25	951	1987	223287
[OVER]	GO:0015575	mannitol transmembrane transporter activity	MOLECULAR_FUNCTION	9.21718e-05	4.18178e-06	4	9	2008	224229
[OVER]	GO:0019430	removal of superoxide radicals	BIOLOGICAL_PROCESS	0.000102473	4.69086e-06	9	129	2003	224109
[OVER]	GO:0016168	chlorophyll binding	MOLECULAR_FUNCTION	0.000105847	4.86257e-06	13	293	1999	223945
[OVER]	GO:0010090	trichome morphogenesis	BIOLOGICAL_PROCESS	0.000119181	5.53339e-06	19	609	1993	223629
[OVER]	GO:0009654	photosystem II oxygen evolving complex	CELLULAR_COMPONENT	0.000120219	5.59135e-06	9	132	2003	224106
[OVER]	GO:0015757	galactose transmembrane transport	BIOLOGICAL_PROCESS	0.000124767	5.81303e-06	4	10	2008	224228
[OVER]	GO:0009753	response to jasmonic acid	BIOLOGICAL_PROCESS	0.000140901	6.61522e-06	29	1245	1983	222993
[OVER]	GO:0009863	salicylic acid mediated signaling pathway	BIOLOGICAL_PROCESS	0.000155864	7.38883e-06	24	925	1988	223313
[OVER]	GO:0010951	negative regulation of endopeptidase activity	BIOLOGICAL_PROCESS	0.000161969	7.75742e-06	5	26	2007	224212
[OVER]	GO:0015798	myo-inositol transport	BIOLOGICAL_PROCESS	0.000163501	7.87075e-06	4	11	2008	224227
[OVER]	GO:0003939	L-iditol 2-dehydrogenase activity	MOLECULAR_FUNCTION	0.000163501	7.87075e-06	4	11	2008	224227
[OVER]	GO:0009538	photosystem I reaction center	CELLULAR_COMPONENT	0.00016352	7.88498e-06	6	47	2006	224191
[OVER]	GO:0010048	vernalization response	BIOLOGICAL_PROCESS	0.000180049	8.74067e-06	14	359	1998	223879
[OVER]	GO:0018298	protein-chromophore linkage	BIOLOGICAL_PROCESS	0.000184285	8.96131e-06	13	311	1999	223927
[OVER]	GO:0009506	plasmodesma	CELLULAR_COMPONENT	0.000187838	9.1647e-06	58	3403	1954	220835
[OVER]	GO:0004784	superoxide dismutase activity	MOLECULAR_FUNCTION	0.000188445	9.22499e-06	8	106	2004	224132
[OVER]	GO:0004755	saccharopine dehydrogenase (NADP+, L-glutamate-forming) activity	MOLECULAR_FUNCTION	0.000209373	1.04201e-05	4	12	2008	224226
[OVER]	GO:0007155	cell adhesion	BIOLOGICAL_PROCESS	0.000217595	1.08824e-05	16	471	1996	223767
[OVER]	GO:0043481	anthocyanin accumulation in tissues in response to UV light	BIOLOGICAL_PROCESS	0.000230069	1.15999e-05	13	319	1999	223919
[OVER]	GO:0009097	isoleucine biosynthetic process	BIOLOGICAL_PROCESS	0.00023845	1.20919e-05	6	51	2006	224187
[OVER]	GO:0047134	protein-disulfide reductase activity	MOLECULAR_FUNCTION	0.000244085	1.24259e-05	5	29	2007	224209
[OVER]	GO:0004866	endopeptidase inhibitor activity	MOLECULAR_FUNCTION	0.000244085	1.24259e-05	5	29	2007	224209
[OVER]	GO:0009963	positive regulation of flavonoid biosynthetic process	BIOLOGICAL_PROCESS	0.00025443	1.29733e-05	10	187	2002	224051
[OVER]	GO:0048838	release of seed from dormancy	BIOLOGICAL_PROCESS	0.000261584	1.35298e-05	4	13	2008	224225
[OVER]	GO:0047130	saccharopine dehydrogenase (NADP+, L-lysine-forming) activity	MOLECULAR_FUNCTION	0.000261584	1.35298e-05	4	13	2008	224225
[OVER]	GO:0005365	myo-inositol transmembrane transporter activity	MOLECULAR_FUNCTION	0.000261584	1.35298e-05	4	13	2008	224225
[OVER]	GO:0050017	L-3-cyanoalanine synthase activity	MOLECULAR_FUNCTION	0.000261584	1.35298e-05	4	13	2008	224225
[OVER]	GO:0070981	L-asparagine biosynthetic process	BIOLOGICAL_PROCESS	0.000264896	1.37659e-05	3	3	2009	224235
[OVER]	GO:0047639	alcohol oxidase activity	MOLECULAR_FUNCTION	0.00030297	1.58926e-05	7	82	2005	224156
[OVER]	GO:0046889	positive regulation of lipid biosynthetic process	BIOLOGICAL_PROCESS	0.000327244	1.72725e-05	4	14	2008	224224
[OVER]	GO:0048544	recognition of pollen	BIOLOGICAL_PROCESS	0.000337331	1.78873e-05	13	333	1999	223905
[OVER]	GO:0047672	anthranilate N-benzoyltransferase activity	MOLECULAR_FUNCTION	0.000355787	1.90398e-05	5	32	2007	224206
[OVER]	GO:0005506	iron ion binding	MOLECULAR_FUNCTION	0.000359315	1.92579e-05	30	1377	1982	222861
[OVER]	GO:0009736	cytokinin-activated signaling pathway	BIOLOGICAL_PROCESS	0.000371477	1.994e-05	11	241	2001	223997
[UNDER]	GO:0015074	DNA integration	BIOLOGICAL_PROCESS	0.000373519	2.008e-05	1	1576	2011	222662
[OVER]	GO:0045454	cell redox homeostasis	BIOLOGICAL_PROCESS	0.000379512	2.0464e-05	16	497	1996	223741
[OVER]	GO:0005777	peroxisome	CELLULAR_COMPONENT	0.00039292	2.1315e-05	26	1123	1986	223115
[OVER]	GO:0015168	glycerol transmembrane transporter activity	MOLECULAR_FUNCTION	0.000398795	2.17637e-05	5	33	2007	224205
[OVER]	GO:0015293	symporter activity	MOLECULAR_FUNCTION	0.000407443	2.23092e-05	18	616	1994	223622
[OVER]	GO:0010207	photosystem II assembly	BIOLOGICAL_PROCESS	0.000422106	2.32421e-05	18	618	1994	223620
[OVER]	GO:0001101	response to acid chemical	BIOLOGICAL_PROCESS	0.000430375	2.37325e-05	33	1592	1979	222646
[OVER]	GO:0009835	fruit ripening	BIOLOGICAL_PROCESS	0.000464337	2.59078e-05	6	59	2006	224179
[OVER]	GO:0006661	phosphatidylinositol biosynthetic process	BIOLOGICAL_PROCESS	0.000482416	2.69952e-05	16	509	1996	223729
[OVER]	GO:0015793	glycerol transport	BIOLOGICAL_PROCESS	0.000499489	2.81133e-05	5	35	2007	224203
[OVER]	GO:0045824	negative regulation of innate immune response	BIOLOGICAL_PROCESS	0.000499489	2.81133e-05	5	35	2007	224203
[OVER]	GO:0035304	regulation of protein dephosphorylation	BIOLOGICAL_PROCESS	0.000534608	3.02206e-05	16	514	1996	223724
[OVER]	GO:0015035	protein disulfide oxidoreductase activity	MOLECULAR_FUNCTION	0.000558024	3.15897e-05	11	254	2001	223984
[OVER]	GO:0010541	acropetal auxin transport	BIOLOGICAL_PROCESS	0.000560632	3.1783e-05	5	36	2007	224202
[OVER]	GO:0016298	lipase activity	MOLECULAR_FUNCTION	0.000568388	3.23153e-05	16	517	1996	223721
[OVER]	GO:0000902	cell morphogenesis	BIOLOGICAL_PROCESS	0.000617105	3.52861e-05	39	2086	1973	222152
[OVER]	GO:0010319	stromule	CELLULAR_COMPONENT	0.000627925	3.60582e-05	10	212	2002	224026
[OVER]	GO:0080052	response to histidine	BIOLOGICAL_PROCESS	0.000656735	3.80336e-05	3	5	2009	224233
[OVER]	GO:0080053	response to phenylalanine	BIOLOGICAL_PROCESS	0.000656735	3.80336e-05	3	5	2009	224233
[OVER]	GO:0043201	response to leucine	BIOLOGICAL_PROCESS	0.000656735	3.80336e-05	3	5	2009	224233
[OVER]	GO:0080115	myosin XI tail binding	MOLECULAR_FUNCTION	0.000656735	3.80336e-05	3	5	2009	224233
[OVER]	GO:1901485	positive regulation of transcription factor catabolic process	BIOLOGICAL_PROCESS	0.000688185	4.01352e-05	4	18	2008	224220
[OVER]	GO:0005354	galactose transmembrane transporter activity	MOLECULAR_FUNCTION	0.000688185	4.01352e-05	4	18	2008	224220
[OVER]	GO:0050529	polyneuridine-aldehyde esterase activity	MOLECULAR_FUNCTION	0.000942391	5.60353e-05	5	41	2007	224197
[OVER]	GO:0015864	pyrimidine nucleoside transport	BIOLOGICAL_PROCESS	0.000950483	5.66713e-05	3	6	2009	224232
[OVER]	GO:0019477	L-lysine catabolic process	BIOLOGICAL_PROCESS	0.000958828	5.74813e-05	4	20	2008	224218
[OVER]	GO:0005452	inorganic anion exchanger activity	MOLECULAR_FUNCTION	0.000958828	5.74813e-05	4	20	2008	224218
[OVER]	GO:0031410	cytoplasmic vesicle	CELLULAR_COMPONENT	0.000977316	5.87488e-05	68	4488	1944	219750
[OVER]	GO:0010036	response to boron-containing substance	BIOLOGICAL_PROCESS	0.00111971	6.79471e-05	4	21	2008	224217
[OVER]	GO:0031225	anchored component of membrane	CELLULAR_COMPONENT	0.00117036	7.13063e-05	12	330	2000	223908
[OVER]	GO:0000272	polysaccharide catabolic process	BIOLOGICAL_PROCESS	0.00117691	7.18014e-05	17	615	1995	223623
[OVER]	GO:0016762	xyloglucan:xyloglucosyl transferase activity	MOLECULAR_FUNCTION	0.00119393	7.30343e-05	6	72	2006	224166
[OVER]	GO:0006817	phosphate ion transport	BIOLOGICAL_PROCESS	0.00120917	7.40647e-05	7	106	2005	224132
[OVER]	GO:0010218	response to far red light	BIOLOGICAL_PROCESS	0.00121761	7.46814e-05	13	385	1999	223853
[OVER]	GO:0016567	protein ubiquitination	BIOLOGICAL_PROCESS	0.00125751	7.7231e-05	31	1569	1981	222669
[OVER]	GO:0009722	detection of cytokinin stimulus	BIOLOGICAL_PROCESS	0.00128362	7.90433e-05	2	0	2010	224238
[OVER]	GO:0017001	antibiotic catabolic process	BIOLOGICAL_PROCESS	0.00128362	7.90433e-05	2	0	2010	224238
[OVER]	GO:0016099	monoterpenoid biosynthetic process	BIOLOGICAL_PROCESS	0.00129313	7.97346e-05	4	22	2008	224216
[OVER]	GO:0006888	endoplasmic reticulum to Golgi vesicle-mediated transport	BIOLOGICAL_PROCESS	0.00142693	8.83333e-05	16	565	1996	223673
[OVER]	GO:0005730	nucleolus	CELLULAR_COMPONENT	0.00167319	0.000104804	32	1637	1980	222601
[OVER]	GO:0015630	microtubule cytoskeleton	CELLULAR_COMPONENT	0.00169692	0.000106567	23	1032	1989	223206
[OVER]	GO:0030750	putrescine N-methyltransferase activity	MOLECULAR_FUNCTION	0.00174459	0.000109845	3	8	2009	224230
[OVER]	GO:0004766	spermidine synthase activity	MOLECULAR_FUNCTION	0.00174459	0.000109845	3	8	2009	224230
[OVER]	GO:0010114	response to red light	BIOLOGICAL_PROCESS	0.00175001	0.00011039	13	401	1999	223837
[OVER]	GO:0010588	cotyledon vascular tissue pattern formation	BIOLOGICAL_PROCESS	0.00176062	0.000111428	5	48	2007	224190
[OVER]	GO:0042300	beta-amyrin synthase activity	MOLECULAR_FUNCTION	0.00176062	0.000111428	5	48	2007	224190
[OVER]	GO:0009825	multidimensional cell growth	BIOLOGICAL_PROCESS	0.00190345	0.000121398	12	350	2000	223888
[OVER]	GO:0003755	peptidyl-prolyl cis-trans isomerase activity	MOLECULAR_FUNCTION	0.00205208	0.000131044	12	353	2000	223885
[OVER]	GO:0042939	tripeptide transport	BIOLOGICAL_PROCESS	0.00208176	0.000133109	5	50	2007	224188
[OVER]	GO:0000413	protein peptidyl-prolyl isomerization	BIOLOGICAL_PROCESS	0.00209931	0.000134403	12	354	2000	223884
[UNDER]	GO:0006310	DNA recombination	BIOLOGICAL_PROCESS	0.00215763	0.000138312	3	1830	2009	222408
[OVER]	GO:0005774	vacuolar membrane	CELLULAR_COMPONENT	0.00216047	0.00013867	40	2305	1972	221933
[OVER]	GO:0030742	GTP-dependent protein binding	MOLECULAR_FUNCTION	0.00225525	0.000145488	3	9	2009	224229
[OVER]	GO:0030445	yeast-form cell wall	CELLULAR_COMPONENT	0.00225525	0.000145488	3	9	2009	224229
[OVER]	GO:0005102	signaling receptor binding	MOLECULAR_FUNCTION	0.00244887	0.000158577	8	162	2004	224076
[OVER]	GO:0046713	borate transport	BIOLOGICAL_PROCESS	0.00249712	0.000161984	4	27	2008	224211
[OVER]	GO:0019843	rRNA binding	MOLECULAR_FUNCTION	0.00251802	0.000163671	15	536	1997	223702
[OVER]	GO:0010315	auxin efflux	BIOLOGICAL_PROCESS	0.00262753	0.00017151	5	53	2007	224185
[OVER]	GO:0008066	glutamate receptor activity	MOLECULAR_FUNCTION	0.00262753	0.000171858	6	85	2006	224153
[OVER]	GO:0005794	Golgi apparatus	CELLULAR_COMPONENT	0.00262753	0.000171715	62	4146	1950	220092
[OVER]	GO:0004559	alpha-mannosidase activity	MOLECULAR_FUNCTION	0.0027794	0.000182471	6	86	2006	224152
[OVER]	GO:0006882	cellular zinc ion homeostasis	BIOLOGICAL_PROCESS	0.00283621	0.000186432	7	124	2005	224114
[OVER]	GO:0009052	pentose-phosphate shunt, non-oxidative branch	BIOLOGICAL_PROCESS	0.00284766	0.00018788	3	10	2009	224228
[OVER]	GO:0015105	arsenite transmembrane transporter activity	MOLECULAR_FUNCTION	0.00284766	0.00018788	3	10	2009	224228
[OVER]	GO:0004751	ribose-5-phosphate isomerase activity	MOLECULAR_FUNCTION	0.00284766	0.00018788	3	10	2009	224228
[OVER]	GO:0009908	flower development	BIOLOGICAL_PROCESS	0.00285517	0.000188608	48	2988	1964	221250
[OVER]	GO:0009624	response to nematode	BIOLOGICAL_PROCESS	0.00297305	0.000197121	11	315	2001	223923
[OVER]	GO:0010155	regulation of proton transport	BIOLOGICAL_PROCESS	0.00304462	0.000202363	11	316	2001	223922
[OVER]	GO:0031965	nuclear membrane	CELLULAR_COMPONENT	0.00307152	0.000204651	7	126	2005	224112
[OVER]	GO:0043966	histone H3 acetylation	BIOLOGICAL_PROCESS	0.00310971	0.000207703	4	29	2008	224209
[OVER]	GO:0006878	cellular copper ion homeostasis	BIOLOGICAL_PROCESS	0.00324759	0.00021744	6	89	2006	224149
[OVER]	GO:0006013	mannose metabolic process	BIOLOGICAL_PROCESS	0.00346587	0.000235212	5	57	2007	224181
[OVER]	GO:0010442	guard cell morphogenesis	BIOLOGICAL_PROCESS	0.00346587	0.000235725	2	1	2010	224237
[OVER]	GO:0080148	negative regulation of response to water deprivation	BIOLOGICAL_PROCESS	0.00346587	0.00023374	4	30	2008	224208
[OVER]	GO:0060776	simple leaf morphogenesis	BIOLOGICAL_PROCESS	0.00346587	0.000235725	2	1	2010	224237
[OVER]	GO:2000032	regulation of secondary shoot formation	BIOLOGICAL_PROCESS	0.00346587	0.000235725	2	1	2010	224237
[OVER]	GO:0090506	axillary shoot meristem initiation	BIOLOGICAL_PROCESS	0.00346587	0.000235725	2	1	2010	224237
[OVER]	GO:0047782	coniferin beta-glucosidase activity	MOLECULAR_FUNCTION	0.00346587	0.000235725	2	1	2010	224237
[OVER]	GO:0016984	ribulose-bisphosphate carboxylase activity	MOLECULAR_FUNCTION	0.00346587	0.00023374	4	30	2008	224208
[OVER]	GO:0032542	sulfiredoxin activity	MOLECULAR_FUNCTION	0.00346587	0.000235725	2	1	2010	224237
[OVER]	GO:0045010	actin nucleation	BIOLOGICAL_PROCESS	0.00358409	0.000244934	14	496	1998	223742
[OVER]	GO:0010106	cellular response to iron ion starvation	BIOLOGICAL_PROCESS	0.00368496	0.000252127	8	174	2004	224064
[OVER]	GO:0051213	dioxygenase activity	MOLECULAR_FUNCTION	0.0037797	0.000258917	19	821	1993	223417
[OVER]	GO:0015078	proton transmembrane transporter activity	MOLECULAR_FUNCTION	0.00380272	0.000260865	28	1460	1984	222778
[OVER]	GO:0050593	N-methylcoclaurine 3'-monooxygenase activity	MOLECULAR_FUNCTION	0.00380272	0.000262043	4	31	2008	224207
[OVER]	GO:0010328	auxin influx transmembrane transporter activity	MOLECULAR_FUNCTION	0.00380272	0.000262043	4	31	2008	224207
[OVER]	GO:0009664	plant-type cell wall organization	BIOLOGICAL_PROCESS	0.0041744	0.000289355	22	1004	1990	223234
[OVER]	GO:1901856	negative regulation of cellular respiration	BIOLOGICAL_PROCESS	0.00420266	0.000292724	4	32	2008	224206
[OVER]	GO:0008553	proton-exporting ATPase activity, phosphorylative mechanism	MOLECULAR_FUNCTION	0.00420266	0.00029243	7	134	2005	224104
[OVER]	GO:0009505	plant-type cell wall	CELLULAR_COMPONENT	0.00420266	0.000293026	18	762	1994	223476
[OVER]	GO:0004066	asparagine synthase (glutamine-hydrolyzing) activity	MOLECULAR_FUNCTION	0.00422041	0.000294951	3	12	2009	224226
[OVER]	GO:0016835	carbon-oxygen lyase activity	MOLECULAR_FUNCTION	0.00429473	0.000300495	20	900	1992	223338
[OVER]	GO:0043069	negative regulation of programmed cell death	BIOLOGICAL_PROCESS	0.00452766	0.000319374	15	572	1997	223666
[OVER]	GO:0005221	intracellular cyclic nucleotide activated cation channel activity	MOLECULAR_FUNCTION	0.0046042	0.000325898	4	33	2008	224205
[OVER]	GO:0010305	leaf vascular tissue pattern formation	BIOLOGICAL_PROCESS	0.00472471	0.000336867	6	97	2006	224141
[OVER]	GO:0016162	cellulose 1,4-beta-cellobiosidase activity	MOLECULAR_FUNCTION	0.00503667	0.000360612	3	13	2009	224225
[OVER]	GO:0010075	regulation of meristem growth	BIOLOGICAL_PROCESS	0.00519996	0.000373998	15	581	1997	223657
[OVER]	GO:0060919	auxin influx	BIOLOGICAL_PROCESS	0.00552646	0.000400181	4	35	2008	224203
[OVER]	GO:0009749	response to glucose	BIOLOGICAL_PROCESS	0.00587703	0.000427481	10	291	2002	223947
[OVER]	GO:0042743	hydrogen peroxide metabolic process	BIOLOGICAL_PROCESS	0.00588002	0.000428657	25	1258	1987	222980
[OVER]	GO:0004713	protein tyrosine kinase activity	MOLECULAR_FUNCTION	0.00601999	0.000440822	22	1059	1990	223179
[OVER]	GO:0010583	response to cyclopentenone	BIOLOGICAL_PROCESS	0.00627029	0.000460682	9	241	2003	223997
[OVER]	GO:0007172	signal complex assembly	BIOLOGICAL_PROCESS	0.00635071	0.00046866	2	2	2010	224236
[OVER]	GO:0010290	chlorophyll catabolite transmembrane transporter activity	MOLECULAR_FUNCTION	0.00635071	0.00046866	2	2	2010	224236
[OVER]	GO:0015431	ATPase-coupled glutathione S-conjugate transmembrane transporter activity	MOLECULAR_FUNCTION	0.00635071	0.00046866	2	2	2010	224236
[OVER]	GO:0036091	positive regulation of transcription from RNA polymerase II promoter in response to oxidative stress	BIOLOGICAL_PROCESS	0.00652559	0.000485818	4	37	2008	224201
[OVER]	GO:0010876	lipid localization	BIOLOGICAL_PROCESS	0.00679862	0.000507252	19	869	1993	223369
[OVER]	GO:0048573	photoperiodism, flowering	BIOLOGICAL_PROCESS	0.00690971	0.000516104	15	600	1997	223638
[OVER]	GO:0047216	inositol 3-alpha-galactosyltransferase activity	MOLECULAR_FUNCTION	0.00693462	0.000518529	3	15	2009	224223
[OVER]	GO:0006862	nucleotide transport	BIOLOGICAL_PROCESS	0.00697041	0.000521773	11	355	2001	223883
[OVER]	GO:0043144	sno(s)RNA processing	BIOLOGICAL_PROCESS	0.00707669	0.000533187	4	38	2008	224200
[OVER]	GO:0005503	all-trans retinal binding	MOLECULAR_FUNCTION	0.00707669	0.000533187	4	38	2008	224200
[OVER]	GO:0047682	aryl-alcohol oxidase activity	MOLECULAR_FUNCTION	0.00707669	0.000533187	4	38	2008	224200
[OVER]	GO:0010039	response to iron ion	BIOLOGICAL_PROCESS	0.0076468	0.000579256	7	151	2005	224087
[OVER]	GO:0006431	methionyl-tRNA aminoacylation	BIOLOGICAL_PROCESS	0.00798327	0.00061168	3	16	2009	224222
[OVER]	GO:0009773	photosynthetic electron transport in photosystem I	BIOLOGICAL_PROCESS	0.00798327	0.000611897	8	200	2004	224038
[OVER]	GO:0004825	methionine-tRNA ligase activity	MOLECULAR_FUNCTION	0.00798327	0.00061168	3	16	2009	224222
[OVER]	GO:0008792	arginine decarboxylase activity	MOLECULAR_FUNCTION	0.00798327	0.00061168	3	16	2009	224222
[OVER]	GO:0016328	lateral plasma membrane	CELLULAR_COMPONENT	0.00798327	0.00061168	3	16	2009	224222
[OVER]	GO:0015996	chlorophyll catabolic process	BIOLOGICAL_PROCESS	0.00811279	0.000623146	11	363	2001	223875
[OVER]	GO:0071215	cellular response to abscisic acid stimulus	BIOLOGICAL_PROCESS	0.00822443	0.000632391	20	925	1992	223313
[OVER]	GO:0051091	positive regulation of DNA-binding transcription factor activity	BIOLOGICAL_PROCESS	0.0082574	0.000637617	4	40	2008	224198
[OVER]	GO:0048510	regulation of timing of transition from vegetative to reproductive phase	BIOLOGICAL_PROCESS	0.00832526	0.000643535	5	72	2007	224166
[OVER]	GO:0030243	cellulose metabolic process	BIOLOGICAL_PROCESS	0.00853755	0.000662726	18	819	1994	223419
[OVER]	GO:0046715	active borate transmembrane transporter activity	MOLECULAR_FUNCTION	0.00912308	0.000714866	3	17	2009	224221
[OVER]	GO:0019932	second-messenger-mediated signaling	BIOLOGICAL_PROCESS	0.00936389	0.000736023	9	258	2003	223980
[OVER]	GO:0015696	ammonium transport	BIOLOGICAL_PROCESS	0.00982769	0.00077575	9	260	2003	223978
[OVER]	GO:0090440	abscisic acid transmembrane transporter activity	MOLECULAR_FUNCTION	0.00982769	0.000776481	2	3	2010	224235

## Sheet: TransM16_EnrichGO
Table S14 Gene ontology (GO) enrichment analysis of transcript modules sharing high correlation coefficient (PCC > 0.7) with the identified metabolite modules in Mallotus japonicus.
Tags	GO ID	GO Name	GO Category	FDR	P-Value	Nr Test	Nr Reference	Non Annot Test	Non Annot Reference
[OVER]	GO:0055114	oxidation-reduction process	BIOLOGICAL_PROCESS	4.05115e-21	6.4693e-24	61	9261	253	216675
[OVER]	GO:0010345	suberin biosynthetic process	BIOLOGICAL_PROCESS	1.38391e-18	3.49444e-21	11	44	303	225892
[OVER]	GO:0010167	response to nitrate	BIOLOGICAL_PROCESS	2.11904e-18	5.52328e-21	17	341	297	225595
[OVER]	GO:0015706	nitrate transport	BIOLOGICAL_PROCESS	1.7381e-17	5.23824e-20	17	392	297	225544
[OVER]	GO:0016762	xyloglucan:xyloglucosyl transferase activity	MOLECULAR_FUNCTION	7.29983e-13	2.85405e-15	9	69	305	225867
[OVER]	GO:0009964	negative regulation of flavonoid biosynthetic process	BIOLOGICAL_PROCESS	6.79488e-12	2.98871e-14	5	1	309	225935
[OVER]	GO:0033729	anthocyanidin reductase activity	MOLECULAR_FUNCTION	6.79488e-12	2.98871e-14	5	1	309	225935
[OVER]	GO:0048046	apoplast	CELLULAR_COMPONENT	1.37762e-11	6.50829e-14	19	1284	295	224652
[OVER]	GO:0050734	hydroxycinnamoyltransferase activity	MOLECULAR_FUNCTION	1.14614e-10	6.25488e-13	5	4	309	225932
[OVER]	GO:0031410	cytoplasmic vesicle	CELLULAR_COMPONENT	2.92608e-09	1.78754e-11	29	4527	285	221409
[OVER]	GO:0006869	lipid transport	BIOLOGICAL_PROCESS	3.32826e-09	2.06034e-11	12	520	302	225416
[OVER]	GO:0050366	tyramine N-feruloyltransferase activity	MOLECULAR_FUNCTION	8.05747e-09	5.44734e-11	4	2	310	225934
[OVER]	GO:0005618	cell wall	CELLULAR_COMPONENT	1.73055e-08	1.24044e-10	19	2009	295	223927
[OVER]	GO:0016021	integral component of membrane	CELLULAR_COMPONENT	2.78216e-08	2.06221e-10	46	11582	268	214354
[OVER]	GO:0071555	cell wall organization	BIOLOGICAL_PROCESS	7.94923e-08	6.02165e-10	20	2479	294	223457
[OVER]	GO:0047672	anthranilate N-benzoyltransferase activity	MOLECULAR_FUNCTION	2.65285e-07	2.096e-09	5	32	309	225904
[OVER]	GO:0006355	regulation of transcription, DNA-templated	BIOLOGICAL_PROCESS	1.15303e-06	1.02371e-08	33	7553	281	218383
[OVER]	GO:0009507	chloroplast	CELLULAR_COMPONENT	1.25695e-06	1.12621e-08	48	14031	266	211905
[OVER]	GO:0008289	lipid binding	MOLECULAR_FUNCTION	1.27287e-06	1.15084e-08	12	923	302	225013
[OVER]	GO:0043565	sequence-specific DNA binding	MOLECULAR_FUNCTION	1.527e-06	1.41792e-08	14	1374	300	224562
[OVER]	GO:0004612	phosphoenolpyruvate carboxykinase (ATP) activity	MOLECULAR_FUNCTION	1.56512e-06	1.49156e-08	5	49	309	225887
[OVER]	GO:0006508	proteolysis	BIOLOGICAL_PROCESS	1.68777e-06	1.66343e-08	27	5399	287	220537
[OVER]	GO:0005886	plasma membrane	CELLULAR_COMPONENT	1.81827e-06	1.80687e-08	40	10690	274	215246
[OVER]	GO:0010200	response to chitin	BIOLOGICAL_PROCESS	1.82713e-06	1.85751e-08	12	965	302	224971
[OVER]	GO:0010363	regulation of plant-type hypersensitive response	BIOLOGICAL_PROCESS	3.31333e-06	3.61641e-08	12	1027	302	224909
[OVER]	GO:0003700	DNA-binding transcription factor activity	MOLECULAR_FUNCTION	5.44584e-06	6.47628e-08	18	2672	296	223264
[OVER]	GO:0050832	defense response to fungus	BIOLOGICAL_PROCESS	5.46923e-06	6.54864e-08	12	1086	302	224850
[OVER]	GO:0009267	cellular response to starvation	BIOLOGICAL_PROCESS	5.66485e-06	6.87516e-08	12	1091	302	224845
[OVER]	GO:0020037	heme binding	MOLECULAR_FUNCTION	6.19709e-06	7.67254e-08	13	1333	301	224603
[OVER]	GO:0015824	proline transport	BIOLOGICAL_PROCESS	6.37608e-06	7.94608e-08	7	244	307	225692
[OVER]	GO:0052325	cell wall pectin biosynthetic process	BIOLOGICAL_PROCESS	1.04805e-05	1.4427e-07	4	29	310	225907
[OVER]	GO:0004553	hydrolase activity, hydrolyzing O-glycosyl compounds	MOLECULAR_FUNCTION	1.06119e-05	1.46944e-07	14	1668	300	224268
[OVER]	GO:0006888	endoplasmic reticulum to Golgi vesicle-mediated transport	BIOLOGICAL_PROCESS	1.1938e-05	1.66278e-07	9	572	305	225364
[OVER]	GO:0005634	nucleus	CELLULAR_COMPONENT	2.41989e-05	3.62678e-07	61	22399	253	203537
[OVER]	GO:0015716	organic phosphonate transport	BIOLOGICAL_PROCESS	5.48557e-05	8.89166e-07	6	219	308	225717
[OVER]	GO:0015416	ATPase-coupled organic phosphonate transmembrane transporter activity	MOLECULAR_FUNCTION	5.48557e-05	8.89166e-07	6	219	308	225717
[OVER]	GO:0006612	protein targeting to membrane	BIOLOGICAL_PROCESS	5.52325e-05	8.99771e-07	11	1146	303	224790
[OVER]	GO:0050468	reticuline oxidase activity	MOLECULAR_FUNCTION	5.6998e-05	9.52893e-07	3	11	311	225925
[OVER]	GO:0043090	amino acid import	BIOLOGICAL_PROCESS	6.30296e-05	1.073e-06	7	363	307	225573
[OVER]	GO:0006073	cellular glucan metabolic process	BIOLOGICAL_PROCESS	6.86895e-05	1.18614e-06	15	2296	299	223640
[OVER]	GO:0052689	carboxylic ester hydrolase activity	MOLECULAR_FUNCTION	8.52328e-05	1.49957e-06	10	969	304	224967
[OVER]	GO:0010583	response to cyclopentenone	BIOLOGICAL_PROCESS	9.1728e-05	1.63627e-06	6	244	308	225692
[OVER]	GO:0003935	GTP cyclohydrolase II activity	MOLECULAR_FUNCTION	0.000117647	2.12737e-06	3	15	311	225921
[OVER]	GO:0048767	root hair elongation	BIOLOGICAL_PROCESS	0.000135855	2.4898e-06	8	593	306	225343
[OVER]	GO:0000041	transition metal ion transport	BIOLOGICAL_PROCESS	0.000173257	3.23173e-06	9	825	305	225111
[OVER]	GO:0008686	3,4-dihydroxy-2-butanone-4-phosphate synthase activity	MOLECULAR_FUNCTION	0.000183714	3.4567e-06	3	18	311	225918
[OVER]	GO:0010731	protein glutathionylation	BIOLOGICAL_PROCESS	0.000211586	3.99837e-06	3	19	311	225917
[OVER]	GO:0010378	temperature compensation of the circadian clock	BIOLOGICAL_PROCESS	0.000296849	5.75467e-06	2	1	312	225935
[OVER]	GO:0050162	oxalate oxidase activity	MOLECULAR_FUNCTION	0.000305803	5.95316e-06	3	22	311	225914
[OVER]	GO:0009737	response to abscisic acid	BIOLOGICAL_PROCESS	0.000395232	7.85507e-06	13	2038	301	223898
[OVER]	GO:0035556	intracellular signal transduction	BIOLOGICAL_PROCESS	0.00043593	8.77044e-06	16	3066	298	222870
[OVER]	GO:0009867	jasmonic acid mediated signaling pathway	BIOLOGICAL_PROCESS	0.00064363	1.34734e-05	8	751	306	225185
[OVER]	GO:0046686	response to cadmium ion	BIOLOGICAL_PROCESS	0.000769008	1.64738e-05	11	1566	303	224370
[OVER]	GO:0009862	systemic acquired resistance, salicylic acid mediated signaling pathway	BIOLOGICAL_PROCESS	0.000853042	1.8413e-05	7	566	307	225370
[OVER]	GO:0015398	high-affinity secondary active ammonium transmembrane transporter activity	MOLECULAR_FUNCTION	0.000883713	1.9147e-05	2	3	312	225933
[OVER]	GO:0015833	peptide transport	BIOLOGICAL_PROCESS	0.000968313	2.14053e-05	21	5277	293	220659
[OVER]	GO:0043069	negative regulation of programmed cell death	BIOLOGICAL_PROCESS	0.000968313	2.14652e-05	7	580	307	225356
[OVER]	GO:0004784	superoxide dismutase activity	MOLECULAR_FUNCTION	0.000968313	2.15321e-05	4	110	310	225826
[OVER]	GO:0008233	peptidase activity	MOLECULAR_FUNCTION	0.00101526	2.26587e-05	16	3318	298	222618
[OVER]	GO:0015802	basic amino acid transport	BIOLOGICAL_PROCESS	0.00123535	2.78726e-05	5	242	309	225694
[OVER]	GO:0042538	hyperosmotic salinity response	BIOLOGICAL_PROCESS	0.00129646	2.93571e-05	6	410	308	225526
[OVER]	GO:0009965	leaf morphogenesis	BIOLOGICAL_PROCESS	0.00135595	3.10355e-05	8	846	306	225090
[OVER]	GO:0010310	regulation of hydrogen peroxide metabolic process	BIOLOGICAL_PROCESS	0.00135595	3.09591e-05	6	414	308	225522
[OVER]	GO:0000373	Group II intron splicing	BIOLOGICAL_PROCESS	0.00153912	3.598e-05	3	42	311	225894
[OVER]	GO:0005777	peroxisome	CELLULAR_COMPONENT	0.00168335	4.00374e-05	9	1140	305	224796
[OVER]	GO:0015696	ammonium transport	BIOLOGICAL_PROCESS	0.00173933	4.17937e-05	5	264	309	225672
[OVER]	GO:0009055	electron transfer activity	MOLECULAR_FUNCTION	0.00173933	4.17534e-05	8	883	306	225053
[OVER]	GO:0008131	primary amine oxidase activity	MOLECULAR_FUNCTION	0.00180591	4.37205e-05	3	45	311	225891
[OVER]	GO:0009805	coumarin biosynthetic process	BIOLOGICAL_PROCESS	0.00180856	4.41938e-05	4	133	310	225803
[OVER]	GO:0044257	cellular protein catabolic process	BIOLOGICAL_PROCESS	0.00182944	4.50473e-05	12	2077	302	223859
[OVER]	GO:0019430	removal of superoxide radicals	BIOLOGICAL_PROCESS	0.00182944	4.54634e-05	4	134	310	225802
[OVER]	GO:0004364	glutathione transferase activity	MOLECULAR_FUNCTION	0.00182944	4.54634e-05	4	134	310	225802
[OVER]	GO:0009617	response to bacterium	BIOLOGICAL_PROCESS	0.00185782	4.65655e-05	11	1759	303	224177
[OVER]	GO:0009231	riboflavin biosynthetic process	BIOLOGICAL_PROCESS	0.00228881	5.89121e-05	3	50	311	225886
[OVER]	GO:0015112	nitrate transmembrane transporter activity	MOLECULAR_FUNCTION	0.00240573	6.23134e-05	3	51	311	225885
[OVER]	GO:1901601	strigolactone biosynthetic process	BIOLOGICAL_PROCESS	0.00261033	6.86762e-05	2	7	312	225929
[OVER]	GO:0080019	fatty-acyl-CoA reductase (alcohol-forming) activity	MOLECULAR_FUNCTION	0.00274292	7.32816e-05	3	54	311	225882
[OVER]	GO:0009407	toxin catabolic process	BIOLOGICAL_PROCESS	0.0032289	8.81064e-05	6	502	308	225434
[OVER]	GO:0009001	serine O-acetyltransferase activity	MOLECULAR_FUNCTION	0.00375953	0.000104729	2	9	312	225927
[OVER]	GO:0032440	2-alkenal reductase [NAD(P)+] activity	MOLECULAR_FUNCTION	0.0039592	0.000110936	10	1615	304	224321
[OVER]	GO:0009409	response to cold	BIOLOGICAL_PROCESS	0.00432675	0.000121587	11	1964	303	223972
[OVER]	GO:0005829	cytosol	CELLULAR_COMPONENT	0.00433195	0.000122087	29	9677	285	216259
[OVER]	GO:0031225	anchored component of membrane	CELLULAR_COMPONENT	0.00454669	0.000128879	5	337	309	225599
[OVER]	GO:0016616	oxidoreductase activity, acting on the CH-OH group of donors, NAD or NADP as acceptor	MOLECULAR_FUNCTION	0.00484267	0.000138847	10	1661	304	224275
[OVER]	GO:0051788	response to misfolded protein	BIOLOGICAL_PROCESS	0.00533509	0.000155138	6	558	308	225378
[OVER]	GO:0034976	response to endoplasmic reticulum stress	BIOLOGICAL_PROCESS	0.0054952	0.000160241	8	1076	306	224860
[OVER]	GO:0002679	respiratory burst involved in defense response	BIOLOGICAL_PROCESS	0.00563039	0.00016589	4	189	310	225747
[OVER]	GO:0080093	regulation of photorespiration	BIOLOGICAL_PROCESS	0.00574931	0.000172802	2	12	312	225924
[OVER]	GO:0015757	galactose transmembrane transport	BIOLOGICAL_PROCESS	0.00574931	0.000172802	2	12	312	225924
[OVER]	GO:0009703	nitrate reductase (NADH) activity	MOLECULAR_FUNCTION	0.00574931	0.000172802	2	12	312	225924
[OVER]	GO:0006862	nucleotide transport	BIOLOGICAL_PROCESS	0.00585386	0.000176422	5	361	309	225575
[OVER]	GO:0043248	proteasome assembly	BIOLOGICAL_PROCESS	0.00585599	0.000176963	6	572	308	225364
[OVER]	GO:0031348	negative regulation of defense response	BIOLOGICAL_PROCESS	0.00604906	0.000184275	7	823	307	225113
[OVER]	GO:0042402	cellular biogenic amine catabolic process	BIOLOGICAL_PROCESS	0.00628631	0.000192527	5	368	309	225568
[OVER]	GO:0051213	dioxygenase activity	MOLECULAR_FUNCTION	0.00641759	0.000198116	7	833	307	225103
[OVER]	GO:0031998	regulation of fatty acid beta-oxidation	BIOLOGICAL_PROCESS	0.00725309	0.000227453	2	14	312	225922
[OVER]	GO:0048578	positive regulation of long-day photoperiodism, flowering	BIOLOGICAL_PROCESS	0.00819135	0.000257543	2	15	312	225921
[OVER]	GO:0003682	chromatin binding	MOLECULAR_FUNCTION	0.00847149	0.000267041	8	1162	306	224774
[OVER]	GO:0047216	inositol 3-alpha-galactosyltransferase activity	MOLECULAR_FUNCTION	0.00908908	0.000289471	2	16	312	225920
[OVER]	GO:0004427	inorganic diphosphatase activity	MOLECULAR_FUNCTION	0.00917873	0.000293821	3	88	311	225848
[OVER]	GO:0016705	oxidoreductase activity, acting on paired donors, with incorporation or reduction of molecular oxygen	MOLECULAR_FUNCTION	0.00923273	0.000296302	10	1829	304	224107
[OVER]	GO:0046914	transition metal ion binding	MOLECULAR_FUNCTION	0.0094343	0.000303539	26	8676	288	217260
[OVER]	GO:0042430	indole-containing compound metabolic process	BIOLOGICAL_PROCESS	0.00984031	0.000317403	5	411	309	225525
[OVER]	GO:1901605	alpha-amino acid metabolic process	BIOLOGICAL_PROCESS	0.00988229	0.000319563	13	2959	301	222977
[OVER]	GO:0031408	oxylipin biosynthetic process	BIOLOGICAL_PROCESS	0.00994557	0.000323022	4	226	310	225710
[OVER]	GO:0050269	coniferyl-aldehyde dehydrogenase activity	MOLECULAR_FUNCTION	0.00994557	0.000323229	2	17	312	225919

## Sheet: TransM7_EnrichGO
Table S14 Gene ontology (GO) enrichment analysis of transcript modules sharing high correlation coefficient (PCC > 0.7) with the identified metabolite modules in Mallotus japonicus.
Tags	GO ID	GO Name	GO Category	FDR	P-Value	Nr Test	Nr Reference	Non Annot Test	Non Annot Reference
[OVER]	GO:0005829	cytosol	CELLULAR_COMPONENT	4.48163e-50	2.66481e-52	243	9463	1628	214916
[OVER]	GO:0005524	ATP binding	MOLECULAR_FUNCTION	1.25101e-42	1.01899e-44	243	10519	1628	213860
[OVER]	GO:0016021	integral component of membrane	CELLULAR_COMPONENT	6.75475e-36	7.37262e-38	240	11388	1631	212991
[OVER]	GO:0005739	mitochondrion	CELLULAR_COMPONENT	1.8886e-21	3.41508e-23	211	12048	1660	212331
[OVER]	GO:0055114	oxidation-reduction process	BIOLOGICAL_PROCESS	1.20382e-20	2.20623e-22	173	9149	1698	215230
[OVER]	GO:0046686	response to cadmium ion	BIOLOGICAL_PROCESS	1.9292e-19	3.67705e-21	59	1518	1812	222861
[OVER]	GO:0009825	multidimensional cell growth	BIOLOGICAL_PROCESS	6.32195e-16	1.44699e-17	27	335	1844	224044
[OVER]	GO:0005802	trans-Golgi network	CELLULAR_COMPONENT	7.03593e-15	1.66772e-16	39	863	1832	223516
[OVER]	GO:0009506	plasmodesma	CELLULAR_COMPONENT	1.24892e-14	3.05187e-16	81	3380	1790	220999
[OVER]	GO:0080167	response to karrikin	BIOLOGICAL_PROCESS	3.76615e-14	9.54037e-16	26	366	1845	224013
[OVER]	GO:0010025	wax biosynthetic process	BIOLOGICAL_PROCESS	6.34463e-14	1.66923e-15	15	76	1856	224303
[OVER]	GO:0048767	root hair elongation	BIOLOGICAL_PROCESS	4.26716e-13	1.22693e-14	30	571	1841	223808
[OVER]	GO:0000911	cytokinesis by cell plate formation	BIOLOGICAL_PROCESS	4.94889e-13	1.43101e-14	35	800	1836	223579
[OVER]	GO:0009086	methionine biosynthetic process	BIOLOGICAL_PROCESS	8.12708e-13	2.37649e-14	29	544	1842	223835
[OVER]	GO:0007020	microtubule nucleation	BIOLOGICAL_PROCESS	2.73853e-12	8.34253e-14	20	235	1851	224144
[OVER]	GO:0019344	cysteine biosynthetic process	BIOLOGICAL_PROCESS	3.72483e-12	1.15899e-13	36	913	1835	223466
[OVER]	GO:0000394	RNA splicing, via endonucleolytic cleavage and ligation	BIOLOGICAL_PROCESS	9.83467e-12	3.20426e-13	29	607	1842	223772
[OVER]	GO:0009860	pollen tube growth	BIOLOGICAL_PROCESS	5.80714e-11	2.00083e-12	26	520	1845	223859
[OVER]	GO:0003682	chromatin binding	MOLECULAR_FUNCTION	7.51895e-11	2.61513e-12	38	1132	1833	223247
[OVER]	GO:0009555	pollen development	BIOLOGICAL_PROCESS	7.98958e-11	2.79183e-12	37	1079	1834	223300
[OVER]	GO:0009705	plant-type vacuole membrane	CELLULAR_COMPONENT	1.30581e-10	4.65867e-12	20	297	1851	224082
[OVER]	GO:0006623	protein targeting to vacuole	BIOLOGICAL_PROCESS	2.43528e-10	8.90641e-12	25	513	1846	223866
[OVER]	GO:0016567	protein ubiquitination	BIOLOGICAL_PROCESS	3.31727e-10	1.23482e-11	44	1556	1827	222823
[OVER]	GO:0009693	ethylene biosynthetic process	BIOLOGICAL_PROCESS	4.39434e-10	1.65723e-11	19	283	1852	224096
[OVER]	GO:0006511	ubiquitin-dependent protein catabolic process	BIOLOGICAL_PROCESS	4.49272e-10	1.69799e-11	43	1510	1828	222869
[OVER]	GO:0010143	cutin biosynthetic process	BIOLOGICAL_PROCESS	6.06588e-10	2.33208e-11	9	29	1862	224350
[OVER]	GO:0009346	citrate lyase complex	CELLULAR_COMPONENT	6.74366e-10	2.60914e-11	6	3	1865	224376
[OVER]	GO:0005777	peroxisome	CELLULAR_COMPONENT	6.7579e-10	2.62566e-11	36	1113	1835	223266
[OVER]	GO:0003700	DNA-binding transcription factor activity	MOLECULAR_FUNCTION	1.04231e-09	4.11763e-11	59	2631	1812	221748
[OVER]	GO:0043481	anthocyanin accumulation in tissues in response to UV light	BIOLOGICAL_PROCESS	2.06386e-09	8.37175e-11	19	313	1852	224066
[OVER]	GO:0042542	response to hydrogen peroxide	BIOLOGICAL_PROCESS	2.42045e-09	9.93652e-11	24	531	1847	223848
[OVER]	GO:0033611	oxalate catabolic process	BIOLOGICAL_PROCESS	3.36501e-09	1.41483e-10	6	5	1865	224374
[OVER]	GO:0046512	sphingosine biosynthetic process	BIOLOGICAL_PROCESS	3.36501e-09	1.41483e-10	6	5	1865	224374
[OVER]	GO:0050203	oxalate-CoA ligase activity	MOLECULAR_FUNCTION	3.36501e-09	1.41483e-10	6	5	1865	224374
[OVER]	GO:0004758	serine C-palmitoyltransferase activity	MOLECULAR_FUNCTION	3.36501e-09	1.41483e-10	6	5	1865	224374
[OVER]	GO:0050897	cobalt ion binding	MOLECULAR_FUNCTION	3.43669e-09	1.45003e-10	15	181	1856	224198
[OVER]	GO:0052667	phosphomethylethanolamine N-methyltransferase activity	MOLECULAR_FUNCTION	4.3078e-09	1.84565e-10	7	13	1864	224366
[OVER]	GO:0031957	very long-chain fatty acid-CoA ligase activity	MOLECULAR_FUNCTION	4.3078e-09	1.84565e-10	7	13	1864	224366
[OVER]	GO:0005267	potassium channel activity	MOLECULAR_FUNCTION	4.3078e-09	1.8433e-10	13	125	1858	224254
[OVER]	GO:0048046	apoplast	CELLULAR_COMPONENT	4.99145e-09	2.14668e-10	37	1266	1834	223113
[OVER]	GO:0019252	starch biosynthetic process	BIOLOGICAL_PROCESS	5.06707e-09	2.18746e-10	32	973	1839	223406
[OVER]	GO:0061025	membrane fusion	BIOLOGICAL_PROCESS	5.34069e-09	2.30993e-10	31	919	1840	223460
[OVER]	GO:0051567	histone H3-K9 methylation	BIOLOGICAL_PROCESS	6.16792e-09	2.68782e-10	25	608	1846	223771
[OVER]	GO:0007030	Golgi organization	BIOLOGICAL_PROCESS	6.3464e-09	2.77077e-10	26	659	1845	223720
[OVER]	GO:0010158	abaxial cell fate specification	BIOLOGICAL_PROCESS	7.32291e-09	3.23289e-10	8	26	1863	224353
[OVER]	GO:0004325	ferrochelatase activity	MOLECULAR_FUNCTION	7.40036e-09	3.27914e-10	9	41	1862	224338
[OVER]	GO:0030170	pyridoxal phosphate binding	MOLECULAR_FUNCTION	7.60022e-09	3.38007e-10	24	566	1847	223813
[OVER]	GO:0010050	vegetative phase change	BIOLOGICAL_PROCESS	8.08171e-09	3.60738e-10	18	303	1853	224076
[OVER]	GO:0030246	carbohydrate binding	MOLECULAR_FUNCTION	9.3068e-09	4.18453e-10	33	1058	1838	223321
[OVER]	GO:0004475	mannose-1-phosphate guanylyltransferase activity	MOLECULAR_FUNCTION	1.1379e-08	5.18114e-10	6	7	1865	224372
[OVER]	GO:0009616	RNAi-mediated antiviral immune response	BIOLOGICAL_PROCESS	1.49034e-08	6.8587e-10	22	491	1849	223888
[OVER]	GO:0010030	positive regulation of seed germination	BIOLOGICAL_PROCESS	2.29925e-08	1.07686e-09	11	91	1860	224288
[OVER]	GO:0043565	sequence-specific DNA binding	MOLECULAR_FUNCTION	2.48964e-08	1.17415e-09	37	1351	1834	223028
[OVER]	GO:0010064	embryonic shoot morphogenesis	BIOLOGICAL_PROCESS	3.09503e-08	1.48991e-09	6	9	1865	224370
[OVER]	GO:0000234	phosphoethanolamine N-methyltransferase activity	MOLECULAR_FUNCTION	4.12666e-08	2.01005e-09	7	20	1864	224359
[OVER]	GO:0009627	systemic acquired resistance	BIOLOGICAL_PROCESS	4.46221e-08	2.19167e-09	33	1134	1838	223245
[OVER]	GO:0042425	choline biosynthetic process	BIOLOGICAL_PROCESS	4.80331e-08	2.36703e-09	6	10	1865	224369
[OVER]	GO:0009630	gravitropism	BIOLOGICAL_PROCESS	5.28167e-08	2.61997e-09	24	631	1847	223748
[OVER]	GO:0052692	raffinose alpha-galactosidase activity	MOLECULAR_FUNCTION	5.66194e-08	2.81321e-09	9	54	1862	224325
[OVER]	GO:0009751	response to salicylic acid	BIOLOGICAL_PROCESS	5.67193e-08	2.8228e-09	34	1208	1837	223171
[OVER]	GO:0000139	Golgi membrane	CELLULAR_COMPONENT	5.82421e-08	2.90333e-09	26	741	1845	223638
[OVER]	GO:0043622	cortical microtubule organization	BIOLOGICAL_PROCESS	6.45778e-08	3.23494e-09	11	102	1860	224277
[OVER]	GO:0015417	ATPase-coupled polyamine transmembrane transporter activity	MOLECULAR_FUNCTION	6.47613e-08	3.2494e-09	9	55	1862	224324
[OVER]	GO:0009738	abscisic acid-activated signaling pathway	BIOLOGICAL_PROCESS	6.72383e-08	3.37916e-09	27	802	1844	223577
[OVER]	GO:0009505	plant-type cell wall	CELLULAR_COMPONENT	8.04482e-08	4.08892e-09	26	754	1845	223625
[OVER]	GO:0016290	palmitoyl-CoA hydrolase activity	MOLECULAR_FUNCTION	9.15737e-08	4.66185e-09	4	0	1867	224379
[OVER]	GO:0009753	response to jasmonic acid	BIOLOGICAL_PROCESS	1.03367e-07	5.27066e-09	34	1240	1837	223139
[OVER]	GO:0009911	positive regulation of flower development	BIOLOGICAL_PROCESS	1.66693e-07	8.66255e-09	11	113	1860	224266
[OVER]	GO:0009793	embryo development ending in seed dormancy	BIOLOGICAL_PROCESS	2.04675e-07	1.08198e-08	49	2289	1822	222090
[OVER]	GO:0071805	potassium ion transmembrane transport	BIOLOGICAL_PROCESS	2.54392e-07	1.35515e-08	15	258	1856	224121
[OVER]	GO:1902047	polyamine transmembrane transport	BIOLOGICAL_PROCESS	2.86536e-07	1.53805e-08	9	67	1862	224312
[OVER]	GO:1901918	negative regulation of exoribonuclease activity	BIOLOGICAL_PROCESS	3.13883e-07	1.7053e-08	5	6	1866	224373
[OVER]	GO:0004725	protein tyrosine phosphatase activity	MOLECULAR_FUNCTION	3.31472e-07	1.80626e-08	11	122	1860	224257
[OVER]	GO:0006833	water transport	BIOLOGICAL_PROCESS	3.55763e-07	1.95312e-08	20	493	1851	223886
[OVER]	GO:0008270	zinc ion binding	MOLECULAR_FUNCTION	3.63121e-07	1.99647e-08	95	6096	1776	218283
[OVER]	GO:0006612	protein targeting to membrane	BIOLOGICAL_PROCESS	4.03648e-07	2.23573e-08	31	1126	1840	223253
[OVER]	GO:0008284	positive regulation of cell population proliferation	BIOLOGICAL_PROCESS	4.2899e-07	2.37959e-08	14	230	1857	224149
[OVER]	GO:0007000	nucleolus organization	BIOLOGICAL_PROCESS	4.369e-07	2.43058e-08	9	71	1862	224308
[OVER]	GO:0000145	exocyst	CELLULAR_COMPONENT	4.85757e-07	2.71426e-08	9	72	1862	224307
[OVER]	GO:0008756	o-succinylbenzoate-CoA ligase activity	MOLECULAR_FUNCTION	6.63386e-07	3.76623e-08	8	52	1863	224327
[OVER]	GO:0080188	gene silencing by RNA-directed DNA methylation	BIOLOGICAL_PROCESS	7.50421e-07	4.30314e-08	8	53	1863	224326
[OVER]	GO:0071472	cellular response to salt stress	BIOLOGICAL_PROCESS	7.50421e-07	4.30314e-08	8	53	1863	224326
[OVER]	GO:0010075	regulation of meristem growth	BIOLOGICAL_PROCESS	8.43182e-07	4.86253e-08	21	575	1850	223804
[OVER]	GO:0042732	D-xylose metabolic process	BIOLOGICAL_PROCESS	8.77479e-07	5.09605e-08	11	136	1860	224243
[OVER]	GO:0009733	response to auxin	BIOLOGICAL_PROCESS	9.41694e-07	5.50734e-08	30	1110	1841	223269
[OVER]	GO:0042335	cuticle development	BIOLOGICAL_PROCESS	9.41694e-07	5.4997e-08	12	171	1859	224208
[OVER]	GO:0005506	iron ion binding	MOLECULAR_FUNCTION	9.62964e-07	5.64742e-08	34	1373	1837	223006
[OVER]	GO:0009524	phragmoplast	CELLULAR_COMPONENT	1.03616e-06	6.08516e-08	15	291	1856	224088
[OVER]	GO:0009414	response to water deprivation	BIOLOGICAL_PROCESS	1.10754e-06	6.54041e-08	33	1315	1838	223064
[OVER]	GO:0015716	organic phosphonate transport	BIOLOGICAL_PROCESS	1.15973e-06	6.8864e-08	13	212	1858	224167
[OVER]	GO:0015416	ATPase-coupled organic phosphonate transmembrane transporter activity	MOLECULAR_FUNCTION	1.15973e-06	6.8864e-08	13	212	1858	224167
[OVER]	GO:0001578	microtubule bundle formation	BIOLOGICAL_PROCESS	1.16056e-06	6.90077e-08	4	2	1867	224377
[OVER]	GO:0042761	very long-chain fatty acid biosynthetic process	BIOLOGICAL_PROCESS	1.5089e-06	9.02121e-08	7	38	1864	224341
[OVER]	GO:0006397	mRNA processing	BIOLOGICAL_PROCESS	1.54151e-06	9.24127e-08	30	1138	1841	223241
[OVER]	GO:0006499	N-terminal protein myristoylation	BIOLOGICAL_PROCESS	1.56017e-06	9.39127e-08	19	493	1852	223886
[OVER]	GO:0047964	glyoxylate reductase (NAD+) activity	MOLECULAR_FUNCTION	1.67673e-06	1.02294e-07	6	22	1865	224357
[OVER]	GO:0016572	histone phosphorylation	BIOLOGICAL_PROCESS	1.7751e-06	1.08585e-07	13	221	1858	224158
[OVER]	GO:0004402	histone acetyltransferase activity	MOLECULAR_FUNCTION	1.96308e-06	1.21203e-07	11	149	1860	224230
[OVER]	GO:0009640	photomorphogenesis	BIOLOGICAL_PROCESS	2.41997e-06	1.51383e-07	26	911	1845	223468
[OVER]	GO:0000938	GARP complex	CELLULAR_COMPONENT	2.48688e-06	1.55772e-07	5	11	1866	224368
[OVER]	GO:0015020	glucuronosyltransferase activity	MOLECULAR_FUNCTION	2.53123e-06	1.58962e-07	6	24	1865	224355
[OVER]	GO:0003878	ATP citrate synthase activity	MOLECULAR_FUNCTION	2.53123e-06	1.58962e-07	6	24	1865	224355
[OVER]	GO:1990388	xylem-to-phloem iron transport	BIOLOGICAL_PROCESS	2.53487e-06	1.59956e-07	4	3	1867	224376
[OVER]	GO:0016207	4-coumarate-CoA ligase activity	MOLECULAR_FUNCTION	2.61819e-06	1.65916e-07	7	42	1864	224337
[OVER]	GO:0051302	regulation of cell division	BIOLOGICAL_PROCESS	2.67799e-06	1.7036e-07	12	191	1859	224188
[OVER]	GO:0004379	glycylpeptide N-tetradecanoyltransferase activity	MOLECULAR_FUNCTION	3.05326e-06	1.95725e-07	6	25	1865	224354
[OVER]	GO:0050732	negative regulation of peptidyl-tyrosine phosphorylation	BIOLOGICAL_PROCESS	3.39731e-06	2.19163e-07	5	12	1866	224367
[OVER]	GO:0046786	viral replication complex formation and maintenance	BIOLOGICAL_PROCESS	3.39731e-06	2.19163e-07	5	12	1866	224367
[OVER]	GO:0009744	response to sucrose	BIOLOGICAL_PROCESS	3.83287e-06	2.49135e-07	23	753	1848	223626
[OVER]	GO:0005516	calmodulin binding	MOLECULAR_FUNCTION	3.91247e-06	2.54627e-07	21	638	1850	223741
[OVER]	GO:0009750	response to fructose	BIOLOGICAL_PROCESS	4.79413e-06	3.1435e-07	18	482	1853	223897
[OVER]	GO:0015439	ATPase-coupled heme transmembrane transporter activity	MOLECULAR_FUNCTION	5.08503e-06	3.34252e-07	8	71	1863	224308
[OVER]	GO:0016618	hydroxypyruvate reductase activity	MOLECULAR_FUNCTION	6.12654e-06	4.06207e-07	5	14	1866	224365
[OVER]	GO:0009923	fatty acid elongase complex	CELLULAR_COMPONENT	6.12654e-06	4.06207e-07	5	14	1866	224365
[OVER]	GO:0016139	glycoside catabolic process	BIOLOGICAL_PROCESS	6.29555e-06	4.19464e-07	6	29	1865	224350
[OVER]	GO:0046777	protein autophosphorylation	BIOLOGICAL_PROCESS	6.68204e-06	4.47937e-07	27	1031	1844	223348
[OVER]	GO:0043547	positive regulation of GTPase activity	BIOLOGICAL_PROCESS	6.92277e-06	4.6633e-07	12	211	1859	224168
[OVER]	GO:0008289	lipid binding	MOLECULAR_FUNCTION	7.51984e-06	5.10224e-07	25	910	1846	223469
[OVER]	GO:0019151	galactose 1-dehydrogenase activity	MOLECULAR_FUNCTION	8.27205e-06	5.64631e-07	3	0	1868	224379
[OVER]	GO:0010349	L-galactose dehydrogenase activity	MOLECULAR_FUNCTION	8.27205e-06	5.64631e-07	3	0	1868	224379
[OVER]	GO:0048497	maintenance of floral organ identity	BIOLOGICAL_PROCESS	1.01033e-05	7.01151e-07	5	16	1866	224363
[OVER]	GO:0005432	calcium:sodium antiporter activity	MOLECULAR_FUNCTION	1.01033e-05	7.01151e-07	5	16	1866	224363
[OVER]	GO:0080008	Cul4-RING E3 ubiquitin ligase complex	CELLULAR_COMPONENT	1.09673e-05	7.64681e-07	18	514	1853	223865
[OVER]	GO:1901617	organic hydroxy compound biosynthetic process	BIOLOGICAL_PROCESS	1.15245e-05	8.06289e-07	43	2203	1828	222176
[OVER]	GO:0006457	protein folding	BIOLOGICAL_PROCESS	1.15245e-05	8.0635e-07	31	1336	1840	223043
[OVER]	GO:0015886	heme transport	BIOLOGICAL_PROCESS	1.19669e-05	8.41199e-07	8	81	1863	224298
[OVER]	GO:0010311	lateral root formation	BIOLOGICAL_PROCESS	1.21996e-05	8.59549e-07	10	146	1861	224233
[OVER]	GO:0046482	para-aminobenzoic acid metabolic process	BIOLOGICAL_PROCESS	1.21996e-05	8.59549e-07	10	146	1861	224233
[OVER]	GO:0006013	mannose metabolic process	BIOLOGICAL_PROCESS	1.22639e-05	8.65077e-07	7	55	1864	224324
[OVER]	GO:0010417	glucuronoxylan biosynthetic process	BIOLOGICAL_PROCESS	1.2702e-05	9.01155e-07	5	17	1866	224362
[OVER]	GO:0019722	calcium-mediated signaling	BIOLOGICAL_PROCESS	1.29551e-05	9.21219e-07	11	185	1860	224194
[OVER]	GO:0047980	hippurate hydrolase activity	MOLECULAR_FUNCTION	1.59182e-05	1.14359e-06	5	18	1866	224361
[OVER]	GO:0009644	response to high light intensity	BIOLOGICAL_PROCESS	1.68863e-05	1.21864e-06	21	706	1850	223673
[OVER]	GO:0019853	L-ascorbic acid biosynthetic process	BIOLOGICAL_PROCESS	1.83408e-05	1.33108e-06	7	59	1864	224320
[OVER]	GO:0080023	3R-hydroxyacyl-CoA dehydratase activity	MOLECULAR_FUNCTION	1.97014e-05	1.43464e-06	5	19	1866	224360
[OVER]	GO:0080051	cutin transport	BIOLOGICAL_PROCESS	2.01476e-05	1.46877e-06	4	7	1867	224372
[OVER]	GO:0004842	ubiquitin-protein transferase activity	MOLECULAR_FUNCTION	2.32183e-05	1.71532e-06	25	976	1846	223403
[OVER]	GO:0001676	long-chain fatty acid metabolic process	BIOLOGICAL_PROCESS	2.58241e-05	1.92887e-06	9	124	1862	224255
[OVER]	GO:0008017	microtubule binding	MOLECULAR_FUNCTION	2.85607e-05	2.14956e-06	15	391	1856	223988
[OVER]	GO:0010183	pollen tube guidance	BIOLOGICAL_PROCESS	2.89745e-05	2.18306e-06	9	126	1862	224253
[OVER]	GO:0010005	cortical microtubule, transverse to long axis	CELLULAR_COMPONENT	2.90349e-05	2.18998e-06	5	21	1866	224358
[OVER]	GO:0046477	glycosylceramide catabolic process	BIOLOGICAL_PROCESS	2.95686e-05	2.23986e-06	6	40	1865	224339
[OVER]	GO:0004775	succinate-CoA ligase (ADP-forming) activity	MOLECULAR_FUNCTION	2.95686e-05	2.23986e-06	6	40	1865	224339
[OVER]	GO:0051973	positive regulation of telomerase activity	BIOLOGICAL_PROCESS	2.95985e-05	2.24454e-06	3	1	1868	224378
[OVER]	GO:0010167	response to nitrate	BIOLOGICAL_PROCESS	3.17021e-05	2.41956e-06	14	344	1857	224035
[OVER]	GO:0006486	protein glycosylation	BIOLOGICAL_PROCESS	3.31449e-05	2.53507e-06	28	1203	1843	223176
[OVER]	GO:0009553	embryo sac development	BIOLOGICAL_PROCESS	3.43525e-05	2.64982e-06	23	870	1848	223509
[OVER]	GO:0030267	glyoxylate reductase (NADP+) activity	MOLECULAR_FUNCTION	3.45322e-05	2.6693e-06	5	22	1866	224357
[OVER]	GO:0004467	long-chain fatty acid-CoA ligase activity	MOLECULAR_FUNCTION	3.74502e-05	2.90402e-06	7	67	1864	224312
[OVER]	GO:0005509	calcium ion binding	MOLECULAR_FUNCTION	3.88295e-05	3.01413e-06	25	1009	1846	223370
[OVER]	GO:0043157	response to cation stress	BIOLOGICAL_PROCESS	4.03732e-05	3.14054e-06	4	9	1867	224370
[OVER]	GO:0032119	sequestering of zinc ion	BIOLOGICAL_PROCESS	4.03732e-05	3.14054e-06	4	9	1867	224370
[OVER]	GO:0008353	RNA polymerase II CTD heptapeptide repeat kinase activity	MOLECULAR_FUNCTION	4.24138e-05	3.31309e-06	9	133	1862	224246
[OVER]	GO:0006656	phosphatidylcholine biosynthetic process	BIOLOGICAL_PROCESS	4.4335e-05	3.47761e-06	7	69	1864	224310
[OVER]	GO:0048481	plant ovule development	BIOLOGICAL_PROCESS	4.49765e-05	3.53159e-06	17	518	1854	223861
[OVER]	GO:0016905	myosin heavy chain kinase activity	MOLECULAR_FUNCTION	4.63521e-05	3.65093e-06	8	100	1863	224279
[OVER]	GO:0008948	oxaloacetate decarboxylase activity	MOLECULAR_FUNCTION	4.89693e-05	3.87303e-06	5	24	1866	224355
[OVER]	GO:0006342	chromatin silencing	BIOLOGICAL_PROCESS	4.93497e-05	3.91518e-06	16	466	1855	223913
[OVER]	GO:0006783	heme biosynthetic process	BIOLOGICAL_PROCESS	5.21361e-05	4.1561e-06	11	218	1860	224161
[OVER]	GO:0009965	leaf morphogenesis	BIOLOGICAL_PROCESS	5.39984e-05	4.31037e-06	22	832	1849	223547
[OVER]	GO:0006094	gluconeogenesis	BIOLOGICAL_PROCESS	6.59189e-05	5.32634e-06	20	716	1851	223663
[OVER]	GO:0019243	methylglyoxal catabolic process to D-lactate via S-lactoyl-glutathione	BIOLOGICAL_PROCESS	6.74416e-05	5.46312e-06	16	479	1855	223900
[OVER]	GO:0047995	hydroxyphenylpyruvate reductase activity	MOLECULAR_FUNCTION	6.84641e-05	5.57661e-06	3	2	1868	224377
[OVER]	GO:0050235	pyridoxal 4-dehydrogenase activity	MOLECULAR_FUNCTION	6.84641e-05	5.57661e-06	3	2	1868	224377
[OVER]	GO:0016589	NURF complex	CELLULAR_COMPONENT	6.84641e-05	5.57661e-06	3	2	1868	224377
[OVER]	GO:0043631	RNA polyadenylation	BIOLOGICAL_PROCESS	7.07634e-05	5.79272e-06	7	75	1864	224304
[OVER]	GO:0043181	vacuolar sequestering	BIOLOGICAL_PROCESS	7.2065e-05	5.91688e-06	4	11	1867	224368
[OVER]	GO:0009695	jasmonic acid biosynthetic process	BIOLOGICAL_PROCESS	7.34783e-05	6.0389e-06	16	483	1855	223896
[OVER]	GO:0015748	organophosphate ester transport	BIOLOGICAL_PROCESS	7.59919e-05	6.26405e-06	19	662	1852	223717
[OVER]	GO:0009611	response to wounding	BIOLOGICAL_PROCESS	7.84045e-05	6.46932e-06	24	988	1847	223391
[OVER]	GO:0001666	response to hypoxia	BIOLOGICAL_PROCESS	8.74761e-05	7.27483e-06	10	188	1861	224191
[OVER]	GO:0010214	seed coat development	BIOLOGICAL_PROCESS	8.84216e-05	7.36067e-06	7	78	1864	224301
[OVER]	GO:0048358	mucilage pectin biosynthetic process	BIOLOGICAL_PROCESS	9.39628e-05	7.83725e-06	4	12	1867	224367
[OVER]	GO:0009827	plant-type cell wall modification	BIOLOGICAL_PROCESS	9.4058e-05	7.85285e-06	14	383	1857	223996
[OVER]	GO:0004069	L-aspartate:2-oxoglutarate aminotransferase activity	MOLECULAR_FUNCTION	9.48266e-05	7.95564e-06	7	79	1864	224300
[OVER]	GO:0045454	cell redox homeostasis	BIOLOGICAL_PROCESS	0.000100601	8.50562e-06	16	497	1855	223882
[OVER]	GO:0009749	response to glucose	BIOLOGICAL_PROCESS	0.000120585	1.0264e-05	12	289	1859	224090
[OVER]	GO:0015706	nitrate transport	BIOLOGICAL_PROCESS	0.000128323	1.0954e-05	14	395	1857	223984
[OVER]	GO:0007040	lysosome organization	BIOLOGICAL_PROCESS	0.000129724	1.10842e-05	3	3	1868	224376
[OVER]	GO:0048439	flower morphogenesis	BIOLOGICAL_PROCESS	0.000133706	1.14571e-05	11	244	1860	224135
[OVER]	GO:0000023	maltose metabolic process	BIOLOGICAL_PROCESS	0.000139643	1.19999e-05	21	824	1850	223555
[OVER]	GO:0004559	alpha-mannosidase activity	MOLECULAR_FUNCTION	0.000144181	1.24251e-05	7	85	1864	224294
[OVER]	GO:0016652	oxidoreductase activity, acting on NAD(P)H, NAD(P) as acceptor	MOLECULAR_FUNCTION	0.000150614	1.30041e-05	4	14	1867	224365
[OVER]	GO:0010008	endosome membrane	CELLULAR_COMPONENT	0.000179589	1.56081e-05	12	302	1859	224077
[OVER]	GO:0009821	alkaloid biosynthetic process	BIOLOGICAL_PROCESS	0.000187752	1.63635e-05	4	15	1867	224364
[OVER]	GO:0048640	negative regulation of developmental growth	BIOLOGICAL_PROCESS	0.000200608	1.7533e-05	5	34	1866	224345
[OVER]	GO:0035542	regulation of SNARE complex assembly	BIOLOGICAL_PROCESS	0.000218733	1.92774e-05	3	4	1868	224375
[OVER]	GO:0016633	galactonolactone dehydrogenase activity	MOLECULAR_FUNCTION	0.000218733	1.92774e-05	3	4	1868	224375
[OVER]	GO:0030897	HOPS complex	CELLULAR_COMPONENT	0.000218733	1.92774e-05	3	4	1868	224375
[OVER]	GO:0000186	activation of MAPKK activity	BIOLOGICAL_PROCESS	0.000223253	1.96939e-05	18	657	1853	223722
[OVER]	GO:0004471	malate dehydrogenase (decarboxylating) (NAD+) activity	MOLECULAR_FUNCTION	0.000229924	2.032e-05	4	16	1867	224363
[OVER]	GO:0007568	aging	BIOLOGICAL_PROCESS	0.000239187	2.1158e-05	17	598	1854	223781
[OVER]	GO:0008793	aromatic-amino-acid:2-oxoglutarate aminotransferase activity	MOLECULAR_FUNCTION	0.000257852	2.28721e-05	7	94	1864	224285
[OVER]	GO:0010106	cellular response to iron ion starvation	BIOLOGICAL_PROCESS	0.000275064	2.44213e-05	9	173	1862	224206
[OVER]	GO:0004709	MAP kinase kinase kinase activity	MOLECULAR_FUNCTION	0.000278457	2.47678e-05	18	669	1853	223710
[OVER]	GO:0010600	regulation of auxin biosynthetic process	BIOLOGICAL_PROCESS	0.000279836	2.49361e-05	4	17	1867	224362
[OVER]	GO:0005385	zinc ion transmembrane transporter activity	MOLECULAR_FUNCTION	0.000284013	2.53777e-05	5	37	1866	224342
[OVER]	GO:0032440	2-alkenal reductase [NAD(P)+] activity	MOLECULAR_FUNCTION	0.000284013	2.53666e-05	31	1594	1840	222785
[OVER]	GO:0005834	heterotrimeric G-protein complex	CELLULAR_COMPONENT	0.000285302	2.55626e-05	10	219	1861	224160
[OVER]	GO:0051726	regulation of cell cycle	BIOLOGICAL_PROCESS	0.000301008	2.70679e-05	29	1434	1842	222945
[OVER]	GO:0003713	transcription coactivator activity	MOLECULAR_FUNCTION	0.000326207	2.94136e-05	7	98	1864	224281
[OVER]	GO:0031116	positive regulation of microtubule polymerization	BIOLOGICAL_PROCESS	0.000334576	3.02772e-05	4	18	1867	224361
[OVER]	GO:0034052	positive regulation of plant-type hypersensitive response	BIOLOGICAL_PROCESS	0.000334576	3.02772e-05	4	18	1867	224361
[OVER]	GO:0080172	petal epidermis patterning	BIOLOGICAL_PROCESS	0.000337515	3.06532e-05	3	5	1868	224374
[OVER]	GO:0046509	1,2-diacylglycerol 3-beta-galactosyltransferase activity	MOLECULAR_FUNCTION	0.000337515	3.06532e-05	3	5	1868	224374
[OVER]	GO:0032880	regulation of protein localization	BIOLOGICAL_PROCESS	0.00034896	3.18347e-05	10	225	1861	224154
[OVER]	GO:0010118	stomatal movement	BIOLOGICAL_PROCESS	0.000358218	3.27651e-05	14	438	1857	223941
[OVER]	GO:0052689	carboxylic ester hydrolase activity	MOLECULAR_FUNCTION	0.000371758	3.4278e-05	22	957	1849	223422
[OVER]	GO:0070072	vacuolar proton-transporting V-type ATPase complex assembly	BIOLOGICAL_PROCESS	0.000393152	3.64106e-05	4	19	1867	224360
[OVER]	GO:0006085	acetyl-CoA biosynthetic process	BIOLOGICAL_PROCESS	0.000427318	3.96792e-05	7	103	1864	224276
[OVER]	GO:0030968	endoplasmic reticulum unfolded protein response	BIOLOGICAL_PROCESS	0.000458297	4.27052e-05	15	509	1856	223870
[OVER]	GO:0043069	negative regulation of programmed cell death	BIOLOGICAL_PROCESS	0.00046171	4.30608e-05	16	571	1855	223808
[OVER]	GO:0032968	positive regulation of transcription elongation from RNA polymerase II promoter	BIOLOGICAL_PROCESS	0.000464193	4.34058e-05	4	20	1867	224359
[OVER]	GO:0009735	response to cytokinin	BIOLOGICAL_PROCESS	0.000464193	4.33624e-05	19	766	1852	223613
[OVER]	GO:0071577	zinc ion transmembrane transport	BIOLOGICAL_PROCESS	0.000471692	4.42223e-05	5	42	1866	224337
[OVER]	GO:0004819	glutamine-tRNA ligase activity	MOLECULAR_FUNCTION	0.000485719	4.56956e-05	3	6	1868	224373
[OVER]	GO:0010488	UDP-galactose:N-glycan beta-1,3-galactosyltransferase activity	MOLECULAR_FUNCTION	0.000485719	4.56956e-05	3	6	1868	224373
[OVER]	GO:0051287	NAD binding	MOLECULAR_FUNCTION	0.00049391	4.65065e-05	15	513	1856	223866
[OVER]	GO:0004031	aldehyde oxidase activity	MOLECULAR_FUNCTION	0.000519342	4.9028e-05	5	43	1866	224336
[OVER]	GO:0000184	nuclear-transcribed mRNA catabolic process, nonsense-mediated decay	BIOLOGICAL_PROCESS	0.00059472	5.65801e-05	6	74	1865	224305
[OVER]	GO:0006904	vesicle docking involved in exocytosis	BIOLOGICAL_PROCESS	0.00059472	5.65801e-05	6	74	1865	224305
[OVER]	GO:0140098	catalytic activity, acting on RNA	MOLECULAR_FUNCTION	0.000625371	5.96489e-05	35	1984	1836	222395
[OVER]	GO:0009116	nucleoside metabolic process	BIOLOGICAL_PROCESS	0.000667748	6.40172e-05	11	297	1860	224082
[OVER]	GO:0042803	protein homodimerization activity	MOLECULAR_FUNCTION	0.000689697	6.61777e-05	15	530	1856	223849
[OVER]	GO:0050832	defense response to fungus	BIOLOGICAL_PROCESS	0.000690009	6.62638e-05	23	1075	1848	223304
[OVER]	GO:0048581	negative regulation of post-embryonic development	BIOLOGICAL_PROCESS	0.000700052	6.73423e-05	10	247	1861	224132
[OVER]	GO:0052636	arabinosyltransferase activity	MOLECULAR_FUNCTION	0.000709929	6.83503e-05	2	0	1869	224379
[OVER]	GO:0019375	galactolipid biosynthetic process	BIOLOGICAL_PROCESS	0.000710941	6.85635e-05	12	354	1859	224025
[OVER]	GO:0032993	protein-DNA complex	CELLULAR_COMPONENT	0.000710941	6.85635e-05	12	354	1859	224025
[OVER]	GO:0016208	AMP binding	MOLECULAR_FUNCTION	0.000751518	7.27828e-05	7	114	1864	224265
[OVER]	GO:0080129	proteasome core complex assembly	BIOLOGICAL_PROCESS	0.000775193	7.51388e-05	13	415	1858	223964
[OVER]	GO:0002213	defense response to insect	BIOLOGICAL_PROCESS	0.000790264	7.66641e-05	7	115	1864	224264
[OVER]	GO:0006598	polyamine catabolic process	BIOLOGICAL_PROCESS	0.00082921	8.07124e-05	7	116	1864	224263
[OVER]	GO:0015770	sucrose transport	BIOLOGICAL_PROCESS	0.000835532	8.14638e-05	4	24	1867	224355
[OVER]	GO:0010027	thylakoid membrane organization	BIOLOGICAL_PROCESS	0.000839863	8.20229e-05	20	875	1851	223504
[OVER]	GO:0006694	steroid biosynthetic process	BIOLOGICAL_PROCESS	0.000840263	8.21304e-05	18	737	1853	223642
[OVER]	GO:0005085	guanyl-nucleotide exchange factor activity	MOLECULAR_FUNCTION	0.000868215	8.49333e-05	7	117	1864	224262
[OVER]	GO:0015035	protein disulfide oxidoreductase activity	MOLECULAR_FUNCTION	0.00088357	8.67233e-05	10	255	1861	224124
[OVER]	GO:0045604	regulation of epidermal cell differentiation	BIOLOGICAL_PROCESS	0.000899509	8.86541e-05	3	8	1868	224371
[OVER]	GO:0009570	chloroplast stroma	CELLULAR_COMPONENT	0.000919062	9.07309e-05	46	2939	1825	221440
[OVER]	GO:0050792	regulation of viral process	BIOLOGICAL_PROCESS	0.00094626	9.38784e-05	4	25	1867	224354
[OVER]	GO:0004353	glutamate dehydrogenase [NAD(P)+] activity	MOLECULAR_FUNCTION	0.00094626	9.38784e-05	4	25	1867	224354
[OVER]	GO:0010090	trichome morphogenesis	BIOLOGICAL_PROCESS	0.000947927	9.4121e-05	16	612	1855	223767
[OVER]	GO:0000922	spindle pole	CELLULAR_COMPONENT	0.000954754	9.49544e-05	5	50	1866	224329
[OVER]	GO:0051788	response to misfolded protein	BIOLOGICAL_PROCESS	0.000966244	9.64494e-05	15	549	1856	223830
[OVER]	GO:0009854	oxidative photosynthetic carbon pathway	BIOLOGICAL_PROCESS	0.00103277	0.000103554	5	51	1866	224328
[OVER]	GO:0004506	squalene monooxygenase activity	MOLECULAR_FUNCTION	0.00107062	0.000107611	4	26	1867	224353
[OVER]	GO:0010182	sugar mediated signaling pathway	BIOLOGICAL_PROCESS	0.00107412	0.000108139	14	492	1857	223887
[OVER]	GO:0061136	regulation of proteasomal protein catabolic process	BIOLOGICAL_PROCESS	0.00108389	0.000109298	6	84	1865	224295
[OVER]	GO:0010638	positive regulation of organelle organization	BIOLOGICAL_PROCESS	0.00109997	0.000111009	19	825	1852	223554
[OVER]	GO:0035725	sodium ion transmembrane transport	BIOLOGICAL_PROCESS	0.00118125	0.000119789	7	124	1864	224255
[OVER]	GO:0044030	regulation of DNA methylation	BIOLOGICAL_PROCESS	0.00120844	0.000122744	4	27	1867	224352
[OVER]	GO:0047763	caffeate O-methyltransferase activity	MOLECULAR_FUNCTION	0.00120844	0.000122744	4	27	1867	224352
[OVER]	GO:0055081	anion homeostasis	BIOLOGICAL_PROCESS	0.00121429	0.000123437	6	86	1865	224293
[OVER]	GO:0050660	flavin adenine dinucleotide binding	MOLECULAR_FUNCTION	0.00122571	0.000124698	18	763	1853	223616
[OVER]	GO:0031048	heterochromatin assembly by small RNA	BIOLOGICAL_PROCESS	0.00126397	0.000128796	13	439	1858	223940
[OVER]	GO:0004177	aminopeptidase activity	MOLECULAR_FUNCTION	0.00130339	0.000133025	8	170	1863	224209
[OVER]	GO:0009684	indoleacetic acid biosynthetic process	BIOLOGICAL_PROCESS	0.00132964	0.000135921	10	270	1861	224109
[OVER]	GO:0000278	mitotic cell cycle	BIOLOGICAL_PROCESS	0.00132964	0.000135833	30	1669	1841	222710
[OVER]	GO:0070588	calcium ion transmembrane transport	BIOLOGICAL_PROCESS	0.00136532	0.000139902	10	271	1861	224108
[OVER]	GO:0042752	regulation of circadian rhythm	BIOLOGICAL_PROCESS	0.00140064	0.000143635	8	172	1863	224207
[OVER]	GO:0048449	floral organ formation	BIOLOGICAL_PROCESS	0.00142254	0.000145996	15	571	1856	223808
[OVER]	GO:0004197	cysteine-type endopeptidase activity	MOLECULAR_FUNCTION	0.00146945	0.00015117	7	129	1864	224250
[OVER]	GO:0042218	1-aminocyclopropane-1-carboxylate biosynthetic process	BIOLOGICAL_PROCESS	0.00147185	0.000151776	3	10	1868	224369
[OVER]	GO:0016847	1-aminocyclopropane-1-carboxylate synthase activity	MOLECULAR_FUNCTION	0.00147185	0.000151776	3	10	1868	224369
[OVER]	GO:0004128	cytochrome-b5 reductase activity, acting on NAD(P)H	MOLECULAR_FUNCTION	0.00147185	0.000151776	3	10	1868	224369
[OVER]	GO:0045727	positive regulation of translation	BIOLOGICAL_PROCESS	0.0014757	0.000152294	9	222	1862	224157
[OVER]	GO:0015250	water channel activity	MOLECULAR_FUNCTION	0.00162272	0.000168391	5	57	1866	224322
[OVER]	GO:0005096	GTPase activator activity	MOLECULAR_FUNCTION	0.0016644	0.000172988	7	132	1864	224247
[OVER]	GO:0072686	mitotic spindle	CELLULAR_COMPONENT	0.00169999	0.000177379	4	30	1867	224349
[OVER]	GO:0009574	preprophase band	CELLULAR_COMPONENT	0.0017353	0.000181665	5	58	1866	224321
[OVER]	GO:2001006	regulation of cellulose biosynthetic process	BIOLOGICAL_PROCESS	0.00181861	0.000191979	3	11	1868	224368
[OVER]	GO:0010360	negative regulation of anion channel activity	BIOLOGICAL_PROCESS	0.00181861	0.000191979	3	11	1868	224368
[OVER]	GO:0010493	Lewis a epitope biosynthetic process	BIOLOGICAL_PROCESS	0.00181861	0.000191979	3	11	1868	224368
[OVER]	GO:0004818	glutamate-tRNA ligase activity	MOLECULAR_FUNCTION	0.00181861	0.000191979	3	11	1868	224368
[OVER]	GO:0018849	muconate cycloisomerase activity	MOLECULAR_FUNCTION	0.00181861	0.000191979	3	11	1868	224368
[OVER]	GO:0008352	katanin complex	CELLULAR_COMPONENT	0.00181861	0.000191979	3	11	1868	224368
[OVER]	GO:0072593	reactive oxygen species metabolic process	BIOLOGICAL_PROCESS	0.00184204	0.000194602	28	1535	1843	222844
[OVER]	GO:0048015	phosphatidylinositol-mediated signaling	BIOLOGICAL_PROCESS	0.00187746	0.000198956	4	31	1867	224348
[OVER]	GO:0033044	regulation of chromosome organization	BIOLOGICAL_PROCESS	0.00188451	0.000199856	17	724	1854	223655
[OVER]	GO:0071258	cellular response to gravity	BIOLOGICAL_PROCESS	0.00190964	0.000203922	2	1	1869	224378
[OVER]	GO:0051512	positive regulation of unidimensional cell growth	BIOLOGICAL_PROCESS	0.00190964	0.000203922	2	1	1869	224378
[OVER]	GO:0034972	histone H3-R26 methylation	BIOLOGICAL_PROCESS	0.00190964	0.000203922	2	1	1869	224378
[OVER]	GO:0034971	histone H3-R17 methylation	BIOLOGICAL_PROCESS	0.00190964	0.000203922	2	1	1869	224378
[OVER]	GO:0034970	histone H3-R2 methylation	BIOLOGICAL_PROCESS	0.00190964	0.000203922	2	1	1869	224378
[OVER]	GO:0019912	cyclin-dependent protein kinase activating kinase activity	MOLECULAR_FUNCTION	0.00190964	0.000203922	2	1	1869	224378
[OVER]	GO:0033947	mannosylglycoprotein endo-beta-mannosidase activity	MOLECULAR_FUNCTION	0.00190964	0.000203922	2	1	1869	224378
[OVER]	GO:0009723	response to ethylene	BIOLOGICAL_PROCESS	0.00192596	0.000205821	21	1014	1850	223365
[OVER]	GO:0031969	chloroplast membrane	CELLULAR_COMPONENT	0.00194646	0.000208169	20	941	1851	223438
[OVER]	GO:0045735	nutrient reservoir activity	MOLECULAR_FUNCTION	0.00200379	0.000214954	7	137	1864	224242
[OVER]	GO:0004693	cyclin-dependent protein serine/threonine kinase activity	MOLECULAR_FUNCTION	0.00200379	0.000214954	7	137	1864	224242
[OVER]	GO:0043177	organic acid binding	MOLECULAR_FUNCTION	0.00200442	0.000215185	9	233	1862	224146
[OVER]	GO:0043967	histone H4 acetylation	BIOLOGICAL_PROCESS	0.00206655	0.00022236	4	32	1867	224347
[OVER]	GO:0034739	histone deacetylase activity (H4-K16 specific)	MOLECULAR_FUNCTION	0.00206655	0.00022236	4	32	1867	224347
[OVER]	GO:0020037	heme binding	MOLECULAR_FUNCTION	0.00206884	0.000222775	25	1321	1846	223058
[OVER]	GO:0009881	photoreceptor activity	MOLECULAR_FUNCTION	0.00210005	0.000226307	5	61	1866	224318
[OVER]	GO:0009110	vitamin biosynthetic process	BIOLOGICAL_PROCESS	0.00219658	0.000237066	11	347	1860	224032
[OVER]	GO:0042023	DNA endoreduplication	BIOLOGICAL_PROCESS	0.00219658	0.000237066	11	347	1860	224032
[OVER]	GO:0051013	microtubule severing	BIOLOGICAL_PROCESS	0.00220814	0.000238494	3	12	1868	224367
[OVER]	GO:0010103	stomatal complex morphogenesis	BIOLOGICAL_PROCESS	0.00237782	0.000257789	14	537	1857	223842
[OVER]	GO:0006569	tryptophan catabolic process	BIOLOGICAL_PROCESS	0.00244471	0.00026544	9	240	1862	224139
[OVER]	GO:0000162	tryptophan biosynthetic process	BIOLOGICAL_PROCESS	0.00252907	0.00027501	4	34	1867	224345
[OVER]	GO:0009168	purine ribonucleoside monophosphate biosynthetic process	BIOLOGICAL_PROCESS	0.0025868	0.00028171	6	101	1865	224278
[OVER]	GO:2000904	regulation of starch metabolic process	BIOLOGICAL_PROCESS	0.00266281	0.000291723	3	13	1868	224366
[OVER]	GO:0042742	defense response to bacterium	BIOLOGICAL_PROCESS	0.00269448	0.000295411	26	1397	1845	222982
[OVER]	GO:0035335	peptidyl-tyrosine dephosphorylation	BIOLOGICAL_PROCESS	0.00283292	0.000311282	6	103	1865	224276
[OVER]	GO:0050826	response to freezing	BIOLOGICAL_PROCESS	0.00284939	0.000313324	11	359	1860	224020
[OVER]	GO:0006275	regulation of DNA replication	BIOLOGICAL_PROCESS	0.00302279	0.00033313	13	486	1858	223893
[OVER]	GO:0005876	spindle microtubule	CELLULAR_COMPONENT	0.00308169	0.000340123	5	67	1866	224312
[OVER]	GO:0034432	bis(5'-adenosyl)-pentaphosphatase activity	MOLECULAR_FUNCTION	0.00318508	0.000352053	3	14	1868	224365
[OVER]	GO:0009933	meristem structural organization	BIOLOGICAL_PROCESS	0.00319638	0.000353562	20	982	1851	223397
[OVER]	GO:0006346	DNA methylation-dependent heterochromatin assembly	BIOLOGICAL_PROCESS	0.00323947	0.00035912	13	490	1858	223889
[OVER]	GO:0045995	regulation of embryonic development	BIOLOGICAL_PROCESS	0.00332007	0.000369948	4	37	1867	224342
[OVER]	GO:0000220	vacuolar proton-transporting V-type ATPase, V0 domain	CELLULAR_COMPONENT	0.00332007	0.000369948	4	37	1867	224342
[OVER]	GO:0009832	plant-type cell wall biogenesis	BIOLOGICAL_PROCESS	0.00335082	0.000373921	14	558	1857	223821
[UNDER]	GO:0015074	DNA integration	BIOLOGICAL_PROCESS	0.00347308	0.000388413	2	1575	1869	222804
[OVER]	GO:0004180	carboxypeptidase activity	MOLECULAR_FUNCTION	0.00350026	0.000391738	11	369	1860	224010
[OVER]	GO:0047213	anthocyanidin 3-O-glucosyltransferase activity	MOLECULAR_FUNCTION	0.00352944	0.00039529	9	254	1862	224125
[OVER]	GO:0030797	24-methylenesterol C-methyltransferase activity	MOLECULAR_FUNCTION	0.00360836	0.000405598	2	2	1869	224377
[OVER]	GO:0047517	1,4-beta-D-xylan synthase activity	MOLECULAR_FUNCTION	0.00360836	0.000405598	2	2	1869	224377
[OVER]	GO:0010176	homogentisate phytyltransferase activity	MOLECULAR_FUNCTION	0.00360836	0.000405598	2	2	1869	224377
[OVER]	GO:0016814	hydrolase activity, acting on carbon-nitrogen (but not peptide) bonds, in cyclic amidines	MOLECULAR_FUNCTION	0.00367419	0.000414794	6	109	1865	224270
[OVER]	GO:0004140	dephospho-CoA kinase activity	MOLECULAR_FUNCTION	0.00371373	0.000419863	3	15	1868	224364
[OVER]	GO:0030422	production of siRNA involved in RNA interference	BIOLOGICAL_PROCESS	0.00371575	0.000420394	15	633	1856	223746
[OVER]	GO:0006096	glycolytic process	BIOLOGICAL_PROCESS	0.00375001	0.000425187	22	1136	1849	223243
[OVER]	GO:0004620	phospholipase activity	MOLECULAR_FUNCTION	0.0037809	0.000428997	9	257	1862	224122
[OVER]	GO:0004366	glycerol-3-phosphate O-acyltransferase activity	MOLECULAR_FUNCTION	0.00391313	0.000444957	4	39	1867	224340
[OVER]	GO:0016579	protein deubiquitination	BIOLOGICAL_PROCESS	0.00392158	0.000446236	11	375	1860	224004
[OVER]	GO:0009624	response to nematode	BIOLOGICAL_PROCESS	0.00398701	0.000454007	10	316	1861	224063
[OVER]	GO:1903311	regulation of mRNA metabolic process	BIOLOGICAL_PROCESS	0.00399008	0.000454681	6	111	1865	224268
[OVER]	GO:0055074	calcium ion homeostasis	BIOLOGICAL_PROCESS	0.00415386	0.000475713	6	112	1865	224267
[OVER]	GO:0031406	carboxylic acid binding	MOLECULAR_FUNCTION	0.00419136	0.000481032	13	506	1858	223873
[OVER]	GO:0017136	NAD-dependent histone deacetylase activity	MOLECULAR_FUNCTION	0.00423388	0.000486256	4	40	1867	224339
[OVER]	GO:0045793	positive regulation of cell size	BIOLOGICAL_PROCESS	0.00430842	0.000495519	3	16	1868	224363
[OVER]	GO:0046942	carboxylic acid transport	BIOLOGICAL_PROCESS	0.00440076	0.000507214	15	645	1856	223734
[OVER]	GO:0000419	RNA polymerase V complex	CELLULAR_COMPONENT	0.00452938	0.000522408	5	74	1866	224305
[OVER]	GO:0044211	CTP salvage	BIOLOGICAL_PROCESS	0.0045938	0.000530212	4	41	1867	224338
[OVER]	GO:0000160	phosphorelay signal transduction system	BIOLOGICAL_PROCESS	0.0046698	0.000539364	15	649	1856	223730
[OVER]	GO:0046854	phosphatidylinositol phosphorylation	BIOLOGICAL_PROCESS	0.00469462	0.000543379	6	115	1865	224264
[OVER]	GO:0010286	heat acclimation	BIOLOGICAL_PROCESS	0.00476183	0.000551933	8	212	1863	224167
[OVER]	GO:0051537	2 iron, 2 sulfur cluster binding	MOLECULAR_FUNCTION	0.00476183	0.000551933	8	212	1863	224167
[OVER]	GO:0015386	potassium:proton antiporter activity	MOLECULAR_FUNCTION	0.00476833	0.000553463	5	75	1866	224304
[OVER]	GO:0008831	dTDP-4-dehydrorhamnose reductase activity	MOLECULAR_FUNCTION	0.00497762	0.000579378	3	17	1868	224362
[OVER]	GO:0035304	regulation of protein dephosphorylation	BIOLOGICAL_PROCESS	0.00500858	0.000583797	13	517	1858	223862
[OVER]	GO:0046112	nucleobase biosynthetic process	BIOLOGICAL_PROCESS	0.00549493	0.000644961	6	119	1865	224260
[OVER]	GO:0005788	endoplasmic reticulum lumen	CELLULAR_COMPONENT	0.00549493	0.000644961	6	119	1865	224260
[OVER]	GO:0031123	RNA 3'-end processing	BIOLOGICAL_PROCESS	0.00568037	0.000670472	7	167	1864	224212
[OVER]	GO:0030041	actin filament polymerization	BIOLOGICAL_PROCESS	0.00568037	0.000669674	13	525	1858	223854
[OVER]	GO:1902039	negative regulation of seed dormancy process	BIOLOGICAL_PROCESS	0.00568037	0.00067228	2	3	1869	224376
[OVER]	GO:0045900	negative regulation of translational elongation	BIOLOGICAL_PROCESS	0.00568037	0.00067228	2	3	1869	224376
[OVER]	GO:0010159	specification of animal organ position	BIOLOGICAL_PROCESS	0.00568037	0.00067228	2	3	1869	224376
[OVER]	GO:0004459	L-lactate dehydrogenase activity	MOLECULAR_FUNCTION	0.00568037	0.00067228	2	3	1869	224376
[OVER]	GO:0004046	aminoacylase activity	MOLECULAR_FUNCTION	0.00568037	0.00067228	2	3	1869	224376
[OVER]	GO:0004049	anthranilate synthase activity	MOLECULAR_FUNCTION	0.00568037	0.000671785	3	18	1868	224361
[OVER]	GO:0004637	phosphoribosylamine-glycine ligase activity	MOLECULAR_FUNCTION	0.00568037	0.00067228	2	3	1869	224376
[OVER]	GO:0050105	L-gulonolactone oxidase activity	MOLECULAR_FUNCTION	0.00568037	0.000671785	3	18	1868	224361
[OVER]	GO:0005053	peroxisome matrix targeting signal-2 binding	MOLECULAR_FUNCTION	0.00568037	0.00067228	2	3	1869	224376
[OVER]	GO:0042398	cellular modified amino acid biosynthetic process	BIOLOGICAL_PROCESS	0.00577563	0.000684495	9	275	1862	224104
[OVER]	GO:0005381	iron ion transmembrane transporter activity	MOLECULAR_FUNCTION	0.00582853	0.000691713	5	79	1866	224300
[OVER]	GO:0071407	cellular response to organic cyclic compound	BIOLOGICAL_PROCESS	0.00591453	0.000702402	22	1191	1849	223188
[OVER]	GO:0015095	magnesium ion transmembrane transporter activity	MOLECULAR_FUNCTION	0.0061456	0.000730344	6	122	1865	224257
[OVER]	GO:0048573	photoperiodism, flowering	BIOLOGICAL_PROCESS	0.00635254	0.000755454	14	601	1857	223778
[OVER]	GO:0035601	protein deacylation	BIOLOGICAL_PROCESS	0.00645546	0.000769796	5	81	1866	224298
[OVER]	GO:0043407	negative regulation of MAP kinase activity	BIOLOGICAL_PROCESS	0.00645546	0.000769796	5	81	1866	224298
[OVER]	GO:1901141	regulation of lignin biosynthetic process	BIOLOGICAL_PROCESS	0.0064697	0.000773076	3	19	1868	224360
[OVER]	GO:0070966	nuclear-transcribed mRNA catabolic process, no-go decay	BIOLOGICAL_PROCESS	0.0064697	0.000773076	3	19	1868	224360
[OVER]	GO:0000124	SAGA complex	CELLULAR_COMPONENT	0.0064697	0.000773076	3	19	1868	224360
[OVER]	GO:0030176	integral component of endoplasmic reticulum membrane	CELLULAR_COMPONENT	0.00662308	0.000791942	6	124	1865	224255
[OVER]	GO:0004652	polynucleotide adenylyltransferase activity	MOLECULAR_FUNCTION	0.00662429	0.000793166	4	46	1867	224333
[OVER]	GO:0010089	xylem development	BIOLOGICAL_PROCESS	0.00686484	0.000824022	8	226	1863	224153
[OVER]	GO:0010582	floral meristem determinacy	BIOLOGICAL_PROCESS	0.00711219	0.000855061	4	47	1867	224332
[OVER]	GO:0052542	defense response by callose deposition	BIOLOGICAL_PROCESS	0.00724792	0.000872561	7	175	1864	224204
[OVER]	GO:0015693	magnesium ion transport	BIOLOGICAL_PROCESS	0.00739243	0.000891764	6	127	1865	224252
[OVER]	GO:0007155	cell adhesion	BIOLOGICAL_PROCESS	0.0074353	0.000897541	12	475	1859	223904
[OVER]	GO:0046658	anchored component of plasma membrane	CELLULAR_COMPONENT	0.0074528	0.000900868	7	176	1864	224203
[OVER]	GO:0019915	lipid storage	BIOLOGICAL_PROCESS	0.00750901	0.000908274	10	347	1861	224032
[OVER]	GO:0140103	catalytic activity, acting on a glycoprotein	MOLECULAR_FUNCTION	0.00765435	0.000927101	6	128	1865	224251
[OVER]	GO:0044877	protein-containing complex binding	MOLECULAR_FUNCTION	0.00804396	0.000977567	11	414	1860	223965
[OVER]	GO:0006972	hyperosmotic response	BIOLOGICAL_PROCESS	0.00804589	0.000978457	16	763	1855	223616
[OVER]	GO:0009962	regulation of flavonoid biosynthetic process	BIOLOGICAL_PROCESS	0.00818129	0.000995589	8	233	1863	224146
[OVER]	GO:0009939	positive regulation of gibberellic acid mediated signaling pathway	BIOLOGICAL_PROCESS	0.00820319	0.0010036	3	21	1868	224358
[OVER]	GO:0006042	glucosamine biosynthetic process	BIOLOGICAL_PROCESS	0.00820319	0.00100288	2	4	1869	224375
[OVER]	GO:0033854	glutamate-prephenate aminotransferase activity	MOLECULAR_FUNCTION	0.00820319	0.00100288	2	4	1869	224375
[OVER]	GO:0033853	aspartate-prephenate aminotransferase activity	MOLECULAR_FUNCTION	0.00820319	0.00100288	2	4	1869	224375
[OVER]	GO:0035925	mRNA 3'-UTR AU-rich region binding	MOLECULAR_FUNCTION	0.00820319	0.00100288	2	4	1869	224375
[OVER]	GO:0003885	D-arabinono-1,4-lactone oxidase activity	MOLECULAR_FUNCTION	0.00820319	0.0010036	3	21	1868	224358
[OVER]	GO:0019888	protein phosphatase regulator activity	MOLECULAR_FUNCTION	0.00850819	0.00104369	5	87	1866	224292
[OVER]	GO:0016024	CDP-diacylglycerol biosynthetic process	BIOLOGICAL_PROCESS	0.00863284	0.00106109	4	50	1867	224329
[OVER]	GO:0044206	UMP salvage	BIOLOGICAL_PROCESS	0.00863284	0.00106109	4	50	1867	224329
[OVER]	GO:0051225	spindle assembly	BIOLOGICAL_PROCESS	0.00909283	0.00111985	7	183	1864	224196
[OVER]	GO:0006893	Golgi to plasma membrane transport	BIOLOGICAL_PROCESS	0.00917298	0.00113345	3	22	1868	224357
[OVER]	GO:0006424	glutamyl-tRNA aminoacylation	BIOLOGICAL_PROCESS	0.00917298	0.00113345	3	22	1868	224357
[OVER]	GO:0008878	glucose-1-phosphate adenylyltransferase activity	MOLECULAR_FUNCTION	0.00917298	0.00113345	3	22	1868	224357
[OVER]	GO:0004707	MAP kinase activity	MOLECULAR_FUNCTION	0.00917636	0.00113686	4	51	1867	224328
[OVER]	GO:0010224	response to UV-B	BIOLOGICAL_PROCESS	0.00949758	0.00117898	9	298	1862	224081
[OVER]	GO:0009410	response to xenobiotic stimulus	BIOLOGICAL_PROCESS	0.00985357	0.00122558	7	186	1864	224193

## Sheet: TransM8_EnrichGO
Table S14 Gene ontology (GO) enrichment analysis of transcript modules sharing high correlation coefficient (PCC > 0.7) with the identified metabolite modules in Mallotus japonicus.
Tags	GO ID	GO Name	GO Category	FDR	P-Value	Nr Test	Nr Reference	Non Annot Test	Non Annot Reference
[OVER]	GO:0005802	trans-Golgi network	CELLULAR_COMPONENT	1.35535e-97	6.29265e-100	146	756	3315	222033
[OVER]	GO:0007030	Golgi organization	BIOLOGICAL_PROCESS	2.33706e-63	2.0559e-65	101	584	3360	222205
[OVER]	GO:0016132	brassinosteroid biosynthetic process	BIOLOGICAL_PROCESS	2.90735e-60	2.86543e-62	78	301	3383	222488
[OVER]	GO:0005829	cytosol	CELLULAR_COMPONENT	6.99526e-54	8.31887e-56	367	9339	3094	213450
[OVER]	GO:0016126	sterol biosynthetic process	BIOLOGICAL_PROCESS	5.90289e-49	7.7891e-51	79	467	3382	222322
[OVER]	GO:0006084	acetyl-CoA metabolic process	BIOLOGICAL_PROCESS	9.7634e-48	1.35989e-49	69	334	3392	222455
[OVER]	GO:0055114	oxidation-reduction process	BIOLOGICAL_PROCESS	1.23699e-47	1.73301e-49	343	8979	3118	213810
[OVER]	GO:0009506	plasmodesma	CELLULAR_COMPONENT	2.57796e-46	4.01067e-48	186	3275	3275	219514
[OVER]	GO:0030244	cellulose biosynthetic process	BIOLOGICAL_PROCESS	1.14944e-37	2.3032e-39	69	503	3392	222286
[OVER]	GO:0048767	root hair elongation	BIOLOGICAL_PROCESS	3.22189e-37	6.50834e-39	70	531	3391	222258
[OVER]	GO:0009853	photorespiration	BIOLOGICAL_PROCESS	2.20908e-34	4.7863e-36	71	616	3390	222173
[OVER]	GO:0005524	ATP binding	MOLECULAR_FUNCTION	2.67029e-32	6.06023e-34	335	10427	3126	212362
[OVER]	GO:0006816	calcium ion transport	BIOLOGICAL_PROCESS	7.33998e-31	1.75174e-32	65	580	3396	222209
[OVER]	GO:0048046	apoplast	CELLULAR_COMPONENT	1.03006e-30	2.47511e-32	91	1212	3370	221577
[OVER]	GO:0080129	proteasome core complex assembly	BIOLOGICAL_PROCESS	1.33797e-28	3.37844e-30	52	376	3409	222413
[OVER]	GO:0010075	regulation of meristem growth	BIOLOGICAL_PROCESS	8.62201e-27	2.33863e-28	58	538	3403	222251
[OVER]	GO:0051788	response to misfolded protein	BIOLOGICAL_PROCESS	2.60694e-26	7.13475e-28	56	508	3405	222281
[OVER]	GO:0005747	mitochondrial respiratory chain complex I	CELLULAR_COMPONENT	2.83854e-26	7.79172e-28	33	121	3428	222668
[OVER]	GO:0043481	anthocyanin accumulation in tissues in response to UV light	BIOLOGICAL_PROCESS	8.06783e-26	2.26717e-27	44	288	3417	222501
[OVER]	GO:0032580	Golgi cisterna membrane	CELLULAR_COMPONENT	3.51781e-25	1.02007e-26	21	23	3440	222766
[OVER]	GO:0006511	ubiquitin-dependent protein catabolic process	BIOLOGICAL_PROCESS	4.80633e-24	1.45634e-25	89	1464	3372	221325
[OVER]	GO:0006007	glucose catabolic process	BIOLOGICAL_PROCESS	5.49399e-24	1.66919e-25	44	324	3417	222465
[OVER]	GO:0006623	protein targeting to vacuole	BIOLOGICAL_PROCESS	4.26535e-23	1.33064e-24	51	487	3410	222302
[OVER]	GO:0042538	hyperosmotic salinity response	BIOLOGICAL_PROCESS	9.96456e-23	3.14106e-24	45	371	3416	222418
[OVER]	GO:0046686	response to cadmium ion	BIOLOGICAL_PROCESS	2.00116e-22	6.35704e-24	87	1490	3374	221299
[OVER]	GO:0016760	cellulose synthase (UDP-forming) activity	MOLECULAR_FUNCTION	1.19367e-21	3.89884e-23	31	150	3430	222639
[OVER]	GO:0009086	methionine biosynthetic process	BIOLOGICAL_PROCESS	4.33167e-21	1.46424e-22	50	523	3411	222266
[OVER]	GO:0009734	auxin-activated signaling pathway	BIOLOGICAL_PROCESS	2.05696e-19	7.45578e-21	45	459	3416	222330
[OVER]	GO:0000394	RNA splicing, via endonucleolytic cleavage and ligation	BIOLOGICAL_PROCESS	1.96164e-18	7.36594e-20	49	587	3412	222202
[OVER]	GO:0003700	DNA-binding transcription factor activity	MOLECULAR_FUNCTION	2.07133e-17	8.08151e-19	108	2582	3353	220207
[OVER]	GO:0006612	protein targeting to membrane	BIOLOGICAL_PROCESS	3.05604e-17	1.2023e-18	65	1092	3396	221697
[OVER]	GO:0009000	selenocysteine lyase activity	MOLECULAR_FUNCTION	6.14402e-17	2.43719e-18	13	10	3448	222779
[OVER]	GO:0006833	water transport	BIOLOGICAL_PROCESS	4.91387e-16	1.99725e-17	41	472	3420	222317
[OVER]	GO:0008265	Mo-molybdopterin cofactor sulfurase activity	MOLECULAR_FUNCTION	5.71183e-16	2.33554e-17	14	19	3447	222770
[OVER]	GO:0006457	protein folding	BIOLOGICAL_PROCESS	6.46076e-16	2.65756e-17	69	1298	3392	221491
[OVER]	GO:0018315	molybdenum incorporation into molybdenum-molybdopterin complex	BIOLOGICAL_PROCESS	9.64099e-16	4.03638e-17	13	14	3448	222775
[OVER]	GO:0010118	stomatal movement	BIOLOGICAL_PROCESS	1.31637e-15	5.5327e-17	38	414	3423	222375
[OVER]	GO:0006096	glycolytic process	BIOLOGICAL_PROCESS	1.67118e-15	7.07837e-17	62	1096	3399	221693
[OVER]	GO:0009750	response to fructose	BIOLOGICAL_PROCESS	6.16528e-15	2.6716e-16	39	461	3422	222328
[OVER]	GO:0006598	polyamine catabolic process	BIOLOGICAL_PROCESS	9.02781e-15	3.95615e-16	21	102	3440	222687
[OVER]	GO:0047262	polygalacturonate 4-alpha-galacturonosyltransferase activity	MOLECULAR_FUNCTION	1.16359e-14	5.12751e-16	16	43	3445	222746
[OVER]	GO:0005525	GTP binding	MOLECULAR_FUNCTION	4.19357e-14	1.86844e-15	71	1491	3390	221298
[OVER]	GO:0009611	response to wounding	BIOLOGICAL_PROCESS	4.60831e-14	2.05698e-15	55	957	3406	221832
[OVER]	GO:0006863	purine nucleobase transport	BIOLOGICAL_PROCESS	1.50031e-13	6.83124e-15	24	171	3437	222618
[OVER]	GO:0009269	response to desiccation	BIOLOGICAL_PROCESS	3.42999e-13	1.58969e-14	15	45	3446	222744
[OVER]	GO:0004252	serine-type endopeptidase activity	MOLECULAR_FUNCTION	3.75492e-13	1.7464e-14	37	476	3424	222313
[OVER]	GO:0009793	embryo development ending in seed dormancy	BIOLOGICAL_PROCESS	5.514e-13	2.58251e-14	89	2249	3372	220540
[OVER]	GO:0019344	cysteine biosynthetic process	BIOLOGICAL_PROCESS	2.50579e-12	1.20217e-13	50	899	3411	221890
[OVER]	GO:0016985	mannan endo-1,4-beta-mannosidase activity	MOLECULAR_FUNCTION	4.32408e-12	2.09565e-13	10	11	3451	222778
[OVER]	GO:0007020	microtubule nucleation	BIOLOGICAL_PROCESS	7.36723e-12	3.60306e-13	25	230	3436	222559
[OVER]	GO:0006499	N-terminal protein myristoylation	BIOLOGICAL_PROCESS	8.37831e-12	4.12194e-13	35	477	3426	222312
[OVER]	GO:0009834	plant-type secondary cell wall biogenesis	BIOLOGICAL_PROCESS	1.1224e-11	5.54936e-13	19	119	3442	222670
[OVER]	GO:0006888	endoplasmic reticulum to Golgi vesicle-mediated transport	BIOLOGICAL_PROCESS	1.50869e-11	7.49614e-13	37	544	3424	222245
[OVER]	GO:0046658	anchored component of plasma membrane	CELLULAR_COMPONENT	2.55681e-11	1.28705e-12	21	162	3440	222627
[OVER]	GO:0030151	molybdenum ion binding	MOLECULAR_FUNCTION	3.84556e-11	1.96084e-12	13	42	3448	222747
[OVER]	GO:0009695	jasmonic acid biosynthetic process	BIOLOGICAL_PROCESS	8.88233e-11	4.61589e-12	33	466	3428	222323
[OVER]	GO:0030246	carbohydrate binding	MOLECULAR_FUNCTION	1.10129e-10	5.76792e-12	51	1040	3410	221749
[OVER]	GO:0003756	protein disulfide isomerase activity	MOLECULAR_FUNCTION	1.13173e-10	5.95502e-12	14	59	3447	222730
[OVER]	GO:0080167	response to karrikin	BIOLOGICAL_PROCESS	1.13841e-10	5.99946e-12	29	363	3432	222426
[OVER]	GO:0007264	small GTPase mediated signal transduction	BIOLOGICAL_PROCESS	1.63025e-10	8.71095e-12	32	450	3429	222339
[OVER]	GO:0009041	uridylate kinase activity	MOLECULAR_FUNCTION	1.63025e-10	8.69886e-12	11	27	3450	222762
[OVER]	GO:0070544	histone H3-K36 demethylation	BIOLOGICAL_PROCESS	2.35911e-10	1.27592e-11	6	0	3455	222789
[OVER]	GO:0006777	Mo-molybdopterin cofactor biosynthetic process	BIOLOGICAL_PROCESS	2.35914e-10	1.27786e-11	14	63	3447	222726
[OVER]	GO:0008017	microtubule binding	MOLECULAR_FUNCTION	2.57853e-10	1.403e-11	29	377	3432	222412
[OVER]	GO:0042732	D-xylose metabolic process	BIOLOGICAL_PROCESS	3.07198e-10	1.68567e-11	18	129	3443	222660
[OVER]	GO:0042742	defense response to bacterium	BIOLOGICAL_PROCESS	3.07198e-10	1.6865e-11	59	1364	3402	221425
[OVER]	GO:0042814	monopolar cell growth	BIOLOGICAL_PROCESS	3.16428e-10	1.73975e-11	8	7	3453	222782
[OVER]	GO:0009833	plant-type primary cell wall biogenesis	BIOLOGICAL_PROCESS	3.42208e-10	1.88706e-11	9	13	3452	222776
[OVER]	GO:0004127	cytidylate kinase activity	MOLECULAR_FUNCTION	4.13254e-10	2.2923e-11	10	21	3451	222768
[OVER]	GO:0050832	defense response to fungus	BIOLOGICAL_PROCESS	4.16579e-10	2.31753e-11	50	1048	3411	221741
[OVER]	GO:0045037	protein import into chloroplast stroma	BIOLOGICAL_PROCESS	4.24197e-10	2.36337e-11	13	53	3448	222736
[OVER]	GO:0000165	MAPK cascade	BIOLOGICAL_PROCESS	5.02093e-10	2.80963e-11	56	1271	3405	221518
[OVER]	GO:0009969	xyloglucan biosynthetic process	BIOLOGICAL_PROCESS	5.45626e-10	3.05768e-11	9	14	3452	222775
[OVER]	GO:0009867	jasmonic acid mediated signaling pathway	BIOLOGICAL_PROCESS	5.63744e-10	3.16839e-11	40	719	3421	222070
[OVER]	GO:0010200	response to chitin	BIOLOGICAL_PROCESS	8.46538e-10	4.82672e-11	46	931	3415	221858
[OVER]	GO:0009805	coumarin biosynthetic process	BIOLOGICAL_PROCESS	8.6142e-10	4.92561e-11	17	120	3444	222669
[OVER]	GO:0010014	meristem initiation	BIOLOGICAL_PROCESS	9.89298e-10	5.67293e-11	37	638	3424	222151
[OVER]	GO:0046777	protein autophosphorylation	BIOLOGICAL_PROCESS	1.13125e-09	6.49726e-11	48	1010	3413	221779
[OVER]	GO:0003924	GTPase activity	MOLECULAR_FUNCTION	1.13125e-09	6.50538e-11	46	940	3415	221849
[OVER]	GO:0009736	cytokinin-activated signaling pathway	BIOLOGICAL_PROCESS	1.52124e-09	8.79756e-11	22	230	3439	222559
[OVER]	GO:0000159	protein phosphatase type 2A complex	CELLULAR_COMPONENT	1.55445e-09	9.02763e-11	13	60	3448	222729
[OVER]	GO:0052630	UDP-N-acetylgalactosamine diphosphorylase activity	MOLECULAR_FUNCTION	2.46031e-09	1.44288e-10	7	5	3454	222784
[OVER]	GO:0042398	cellular modified amino acid biosynthetic process	BIOLOGICAL_PROCESS	2.53816e-09	1.4906e-10	23	261	3438	222528
[OVER]	GO:0019888	protein phosphatase regulator activity	MOLECULAR_FUNCTION	2.62802e-09	1.54766e-10	14	78	3447	222711
[OVER]	GO:0009744	response to sucrose	BIOLOGICAL_PROCESS	3.64494e-09	2.17622e-10	39	737	3422	222052
[OVER]	GO:0007018	microtubule-based movement	BIOLOGICAL_PROCESS	4.12213e-09	2.48127e-10	22	244	3439	222545
[OVER]	GO:0035435	phosphate ion transmembrane transport	BIOLOGICAL_PROCESS	4.75314e-09	2.86884e-10	11	40	3450	222749
[OVER]	GO:0043666	regulation of phosphoprotein phosphatase activity	BIOLOGICAL_PROCESS	4.93382e-09	2.98593e-10	13	67	3448	222722
[OVER]	GO:0043565	sequence-specific DNA binding	MOLECULAR_FUNCTION	6.68019e-09	4.0918e-10	55	1333	3406	221456
[OVER]	GO:0007033	vacuole organization	BIOLOGICAL_PROCESS	9.48498e-09	5.90252e-10	29	447	3432	222342
[OVER]	GO:0000303	response to superoxide	BIOLOGICAL_PROCESS	9.66457e-09	6.04171e-10	23	282	3438	222507
[OVER]	GO:0048040	UDP-glucuronate decarboxylase activity	MOLECULAR_FUNCTION	9.70477e-09	6.08673e-10	7	7	3454	222782
[OVER]	GO:0000254	C-4 methylsterol oxidase activity	MOLECULAR_FUNCTION	9.70477e-09	6.08673e-10	7	7	3454	222782
[OVER]	GO:0009862	systemic acquired resistance, salicylic acid mediated signaling pathway	BIOLOGICAL_PROCESS	1.08321e-08	6.85555e-10	32	541	3429	222248
[OVER]	GO:0045010	actin nucleation	BIOLOGICAL_PROCESS	1.08552e-08	6.88786e-10	30	480	3431	222309
[OVER]	GO:0043657	host cell	CELLULAR_COMPONENT	1.23527e-08	7.85815e-10	8	14	3453	222775
[OVER]	GO:0015297	antiporter activity	MOLECULAR_FUNCTION	1.29378e-08	8.24092e-10	35	641	3426	222148
[OVER]	GO:0051777	ent-kaurenoate oxidase activity	MOLECULAR_FUNCTION	1.30825e-08	8.35274e-10	5	0	3456	222789
[OVER]	GO:0009504	cell plate	CELLULAR_COMPONENT	1.33111e-08	8.54374e-10	16	127	3445	222662
[OVER]	GO:0007155	cell adhesion	BIOLOGICAL_PROCESS	1.53907e-08	9.94124e-10	29	458	3432	222331
[OVER]	GO:0050378	UDP-glucuronate 4-epimerase activity	MOLECULAR_FUNCTION	1.59299e-08	1.03025e-09	6	3	3455	222786
[OVER]	GO:0005788	endoplasmic reticulum lumen	CELLULAR_COMPONENT	1.64513e-08	1.06799e-09	15	110	3446	222679
[OVER]	GO:0009845	seed germination	BIOLOGICAL_PROCESS	1.82875e-08	1.19464e-09	40	820	3421	221969
[OVER]	GO:0030968	endoplasmic reticulum unfolded protein response	BIOLOGICAL_PROCESS	1.97862e-08	1.29416e-09	30	494	3431	222295
[OVER]	GO:0032440	2-alkenal reductase [NAD(P)+] activity	MOLECULAR_FUNCTION	1.98082e-08	1.2972e-09	60	1565	3401	221224
[OVER]	GO:0048653	anther development	BIOLOGICAL_PROCESS	2.43922e-08	1.60933e-09	20	222	3441	222567
[OVER]	GO:0010158	abaxial cell fate specification	BIOLOGICAL_PROCESS	2.54965e-08	1.68633e-09	9	25	3452	222764
[OVER]	GO:0010286	heat acclimation	BIOLOGICAL_PROCESS	2.96927e-08	1.96629e-09	19	201	3442	222588
[OVER]	GO:0019276	UDP-N-acetylgalactosamine metabolic process	BIOLOGICAL_PROCESS	2.97533e-08	1.97515e-09	7	9	3454	222780
[OVER]	GO:0006891	intra-Golgi vesicle-mediated transport	BIOLOGICAL_PROCESS	3.05746e-08	2.03217e-09	21	250	3440	222539
[OVER]	GO:0046520	sphingoid biosynthetic process	BIOLOGICAL_PROCESS	3.73535e-08	2.49794e-09	14	99	3447	222690
[OVER]	GO:0042281	dolichyl pyrophosphate Man9GlcNAc2 alpha-1,3-glucosyltransferase activity	MOLECULAR_FUNCTION	3.7965e-08	2.54193e-09	6	4	3455	222785
[OVER]	GO:0009873	ethylene-activated signaling pathway	BIOLOGICAL_PROCESS	5.20885e-08	3.52574e-09	26	396	3435	222393
[OVER]	GO:0004565	beta-galactosidase activity	MOLECULAR_FUNCTION	5.80767e-08	3.94526e-09	13	85	3448	222704
[OVER]	GO:0047334	diphosphate-fructose-6-phosphate 1-phosphotransferase activity	MOLECULAR_FUNCTION	7.23196e-08	4.94785e-09	5	1	3456	222788
[OVER]	GO:0008725	DNA-3-methyladenine glycosylase activity	MOLECULAR_FUNCTION	7.23196e-08	4.95993e-09	9	29	3452	222760
[OVER]	GO:0005484	SNAP receptor activity	MOLECULAR_FUNCTION	7.57272e-08	5.19981e-09	15	125	3446	222664
[OVER]	GO:0010090	trichome morphogenesis	BIOLOGICAL_PROCESS	9.00973e-08	6.20855e-09	32	596	3429	222193
[OVER]	GO:0004703	G protein-coupled receptor kinase activity	MOLECULAR_FUNCTION	1.20271e-07	8.35636e-09	7	12	3454	222777
[OVER]	GO:0009855	determination of bilateral symmetry	BIOLOGICAL_PROCESS	1.24787e-07	8.69045e-09	26	415	3435	222374
[OVER]	GO:0019825	oxygen binding	MOLECULAR_FUNCTION	1.32163e-07	9.21493e-09	20	248	3441	222541
[OVER]	GO:0003777	microtubule motor activity	MOLECULAR_FUNCTION	1.53705e-07	1.07795e-08	19	225	3442	222564
[OVER]	GO:1902334	fructose export from vacuole to cytoplasm	BIOLOGICAL_PROCESS	1.54262e-07	1.0894e-08	6	6	3455	222783
[OVER]	GO:0015284	fructose uniporter activity	MOLECULAR_FUNCTION	1.54262e-07	1.0894e-08	6	6	3455	222783
[OVER]	GO:0045454	cell redox homeostasis	BIOLOGICAL_PROCESS	1.7731e-07	1.2565e-08	28	485	3433	222304
[OVER]	GO:0046715	active borate transmembrane transporter activity	MOLECULAR_FUNCTION	1.78794e-07	1.26846e-08	7	13	3454	222776
[OVER]	GO:0030581	symbiont intracellular protein transport in host	BIOLOGICAL_PROCESS	2.40081e-07	1.715e-08	8	23	3453	222766
[OVER]	GO:0080034	host response to induction by symbiont of tumor, nodule or growth in host	BIOLOGICAL_PROCESS	2.40081e-07	1.715e-08	8	23	3453	222766
[OVER]	GO:0004563	beta-N-acetylhexosaminidase activity	MOLECULAR_FUNCTION	2.77934e-07	1.99673e-08	6	7	3455	222782
[OVER]	GO:0046975	histone methyltransferase activity (H3-K36 specific)	MOLECULAR_FUNCTION	2.77934e-07	1.99673e-08	6	7	3455	222782
[OVER]	GO:0005982	starch metabolic process	BIOLOGICAL_PROCESS	2.87943e-07	2.07098e-08	47	1162	3414	221627
[OVER]	GO:0006207	'de novo' pyrimidine nucleobase biosynthetic process	BIOLOGICAL_PROCESS	3.04143e-07	2.19988e-08	10	49	3451	222740
[OVER]	GO:0051017	actin filament bundle assembly	BIOLOGICAL_PROCESS	3.37018e-07	2.44865e-08	9	36	3452	222753
[OVER]	GO:0010268	brassinosteroid homeostasis	BIOLOGICAL_PROCESS	3.72669e-07	2.71678e-08	7	15	3454	222774
[OVER]	GO:0008395	steroid hydroxylase activity	MOLECULAR_FUNCTION	3.72669e-07	2.71678e-08	7	15	3454	222774
[OVER]	GO:0009688	abscisic acid biosynthetic process	BIOLOGICAL_PROCESS	4.58317e-07	3.36355e-08	14	124	3447	222665
[OVER]	GO:0004305	ethanolamine kinase activity	MOLECULAR_FUNCTION	5.15759e-07	3.78932e-08	8	26	3453	222763
[OVER]	GO:0042910	xenobiotic transmembrane transporter activity	MOLECULAR_FUNCTION	5.90168e-07	4.36004e-08	24	390	3437	222399
[OVER]	GO:0052543	callose deposition in cell wall	BIOLOGICAL_PROCESS	6.02546e-07	4.4564e-08	15	149	3446	222640
[OVER]	GO:0070179	D-serine biosynthetic process	BIOLOGICAL_PROCESS	6.07271e-07	4.50123e-08	5	3	3456	222786
[OVER]	GO:0009624	response to nematode	BIOLOGICAL_PROCESS	6.85027e-07	5.08874e-08	21	305	3440	222484
[OVER]	GO:0005452	inorganic anion exchanger activity	MOLECULAR_FUNCTION	7.202e-07	5.36762e-08	7	17	3454	222772
[OVER]	GO:0043115	precorrin-2 dehydrogenase activity	MOLECULAR_FUNCTION	7.2869e-07	5.46651e-08	4	0	3457	222789
[OVER]	GO:0004851	uroporphyrin-III C-methyltransferase activity	MOLECULAR_FUNCTION	7.2869e-07	5.46651e-08	4	0	3457	222789
[OVER]	GO:0004597	peptide-aspartate beta-dioxygenase activity	MOLECULAR_FUNCTION	7.2869e-07	5.46651e-08	4	0	3457	222789
[OVER]	GO:0008734	L-aspartate oxidase activity	MOLECULAR_FUNCTION	7.2869e-07	5.46651e-08	4	0	3457	222789
[OVER]	GO:0044318	L-aspartate:fumarate oxidoreductase activity	MOLECULAR_FUNCTION	7.2869e-07	5.46651e-08	4	0	3457	222789
[OVER]	GO:0010167	response to nitrate	BIOLOGICAL_PROCESS	7.55221e-07	5.67785e-08	22	336	3439	222453
[OVER]	GO:0006855	drug transmembrane transport	BIOLOGICAL_PROCESS	8.60943e-07	6.47969e-08	25	430	3436	222359
[OVER]	GO:0030170	pyridoxal phosphate binding	MOLECULAR_FUNCTION	8.82808e-07	6.67301e-08	29	561	3432	222228
[OVER]	GO:0020037	heme binding	MOLECULAR_FUNCTION	9.08256e-07	6.88016e-08	49	1297	3412	221492
[OVER]	GO:0005506	iron ion binding	MOLECULAR_FUNCTION	1.08144e-06	8.24494e-08	50	1357	3411	221432
[OVER]	GO:0031357	integral component of chloroplast inner membrane	CELLULAR_COMPONENT	1.16745e-06	8.9577e-08	6	10	3455	222779
[OVER]	GO:0015689	molybdate ion transport	BIOLOGICAL_PROCESS	1.25447e-06	9.66631e-08	8	30	3453	222759
[OVER]	GO:0015098	molybdate ion transmembrane transporter activity	MOLECULAR_FUNCTION	1.25447e-06	9.66631e-08	8	30	3453	222759
[OVER]	GO:0036065	fucosylation	BIOLOGICAL_PROCESS	1.28622e-06	9.9319e-08	7	19	3454	222770
[OVER]	GO:0005871	kinesin complex	CELLULAR_COMPONENT	1.42294e-06	1.10108e-07	17	210	3444	222579
[OVER]	GO:0006011	UDP-glucose metabolic process	BIOLOGICAL_PROCESS	1.54385e-06	1.19967e-07	8	31	3453	222758
[OVER]	GO:0003872	6-phosphofructokinase activity	MOLECULAR_FUNCTION	1.69719e-06	1.32297e-07	7	20	3454	222769
[OVER]	GO:0019761	glucosinolate biosynthetic process	BIOLOGICAL_PROCESS	1.84061e-06	1.44319e-07	28	549	3433	222240
[OVER]	GO:0005507	copper ion binding	MOLECULAR_FUNCTION	1.84061e-06	1.44376e-07	36	835	3425	221954
[UNDER]	GO:0015074	DNA integration	BIOLOGICAL_PROCESS	1.87389e-06	1.47139e-07	3	1574	3458	221215
[OVER]	GO:0030599	pectinesterase activity	MOLECULAR_FUNCTION	2.38788e-06	1.8886e-07	15	168	3446	222621
[OVER]	GO:0046835	carbohydrate phosphorylation	BIOLOGICAL_PROCESS	2.41061e-06	1.90972e-07	16	193	3445	222596
[OVER]	GO:0051015	actin filament binding	MOLECULAR_FUNCTION	2.41349e-06	1.91475e-07	12	101	3449	222688
[OVER]	GO:0042353	fucose biosynthetic process	BIOLOGICAL_PROCESS	2.48101e-06	1.97438e-07	5	5	3456	222784
[OVER]	GO:0030276	clathrin binding	MOLECULAR_FUNCTION	2.55363e-06	2.04049e-07	11	82	3450	222707
[OVER]	GO:0009944	polarity specification of adaxial/abaxial axis	BIOLOGICAL_PROCESS	2.71775e-06	2.17385e-07	16	195	3445	222594
[OVER]	GO:0000149	SNARE binding	MOLECULAR_FUNCTION	3.07368e-06	2.46105e-07	9	49	3452	222740
[OVER]	GO:0033320	UDP-D-xylose biosynthetic process	BIOLOGICAL_PROCESS	3.35826e-06	2.69985e-07	4	1	3457	222788
[OVER]	GO:0050614	delta24-sterol reductase activity	MOLECULAR_FUNCTION	3.35826e-06	2.69985e-07	4	1	3457	222788
[OVER]	GO:0004316	3-oxoacyl-[acyl-carrier-protein] reductase (NADPH) activity	MOLECULAR_FUNCTION	3.54861e-06	2.86444e-07	9	50	3452	222739
[OVER]	GO:0010452	histone H3-K36 methylation	BIOLOGICAL_PROCESS	3.61094e-06	2.91769e-07	6	13	3455	222776
[OVER]	GO:0010152	pollen maturation	BIOLOGICAL_PROCESS	4.09314e-06	3.32399e-07	9	51	3452	222738
[OVER]	GO:0009643	photosynthetic acclimation	BIOLOGICAL_PROCESS	5.02036e-06	4.11377e-07	6	14	3455	222775
[OVER]	GO:0006465	signal peptide processing	BIOLOGICAL_PROCESS	5.70631e-06	4.6898e-07	7	25	3454	222764
[OVER]	GO:0010182	sugar mediated signaling pathway	BIOLOGICAL_PROCESS	5.71513e-06	4.70636e-07	25	481	3436	222308
[OVER]	GO:0010162	seed dormancy process	BIOLOGICAL_PROCESS	5.73455e-06	4.73169e-07	26	515	3435	222274
[OVER]	GO:0030570	pectate lyase activity	MOLECULAR_FUNCTION	6.17117e-06	5.10704e-07	9	54	3452	222735
[OVER]	GO:0045893	positive regulation of transcription, DNA-templated	BIOLOGICAL_PROCESS	6.41421e-06	5.32384e-07	57	1738	3404	221051
[OVER]	GO:0004764	shikimate 3-dehydrogenase (NADP+) activity	MOLECULAR_FUNCTION	6.7884e-06	5.68419e-07	6	15	3455	222774
[OVER]	GO:0003855	3-dehydroquinate dehydratase activity	MOLECULAR_FUNCTION	6.7884e-06	5.68419e-07	6	15	3455	222774
[OVER]	GO:0009705	plant-type vacuole membrane	CELLULAR_COMPONENT	7.64033e-06	6.4411e-07	19	298	3442	222491
[OVER]	GO:0007169	transmembrane receptor protein tyrosine kinase signaling pathway	BIOLOGICAL_PROCESS	7.95601e-06	6.75259e-07	19	299	3442	222490
[OVER]	GO:0047220	galactosylxylosylprotein 3-beta-galactosyltransferase activity	MOLECULAR_FUNCTION	8.04693e-06	6.83632e-07	10	74	3451	222715
[OVER]	GO:0009958	positive gravitropism	BIOLOGICAL_PROCESS	8.28715e-06	7.0539e-07	11	94	3450	222695
[OVER]	GO:0046983	protein dimerization activity	MOLECULAR_FUNCTION	8.35943e-06	7.12223e-07	59	1844	3402	220945
[OVER]	GO:0010050	vegetative phase change	BIOLOGICAL_PROCESS	9.09968e-06	7.77119e-07	19	302	3442	222487
[OVER]	GO:0051764	actin crosslink formation	BIOLOGICAL_PROCESS	9.3368e-06	8.00058e-07	4	2	3457	222787
[OVER]	GO:0033843	xyloglucan 6-xylosyltransferase activity	MOLECULAR_FUNCTION	9.3368e-06	8.00058e-07	4	2	3457	222787
[OVER]	GO:0033987	2-hydroxyisoflavanone dehydratase activity	MOLECULAR_FUNCTION	9.3368e-06	8.00058e-07	4	2	3457	222787
[OVER]	GO:0004849	uridine kinase activity	MOLECULAR_FUNCTION	9.93822e-06	8.528e-07	10	76	3451	222713
[OVER]	GO:0008253	5'-nucleotidase activity	MOLECULAR_FUNCTION	1.01635e-05	8.73377e-07	9	58	3452	222731
[OVER]	GO:0042752	regulation of circadian rhythm	BIOLOGICAL_PROCESS	1.04621e-05	9.00744e-07	14	166	3447	222623
[OVER]	GO:0006896	Golgi to vacuole transport	BIOLOGICAL_PROCESS	1.04631e-05	9.01685e-07	8	42	3453	222747
[OVER]	GO:0003999	adenine phosphoribosyltransferase activity	MOLECULAR_FUNCTION	1.19076e-05	1.03004e-06	6	17	3455	222772
[OVER]	GO:0019243	methylglyoxal catabolic process to D-lactate via S-lactoyl-glutathione	BIOLOGICAL_PROCESS	1.26292e-05	1.09686e-06	24	471	3437	222318
[OVER]	GO:0009742	brassinosteroid mediated signaling pathway	BIOLOGICAL_PROCESS	1.33407e-05	1.16271e-06	15	196	3446	222593
[OVER]	GO:0030136	clathrin-coated vesicle	CELLULAR_COMPONENT	1.33407e-05	1.16271e-06	15	196	3446	222593
[OVER]	GO:0044209	AMP salvage	BIOLOGICAL_PROCESS	1.54517e-05	1.3555e-06	6	18	3455	222771
[OVER]	GO:0009524	phragmoplast	CELLULAR_COMPONENT	1.84861e-05	1.63675e-06	18	288	3443	222501
[OVER]	GO:0006168	adenine salvage	BIOLOGICAL_PROCESS	1.98088e-05	1.76032e-06	6	19	3455	222770
[OVER]	GO:0015204	urea transmembrane transporter activity	MOLECULAR_FUNCTION	1.98088e-05	1.76032e-06	6	19	3455	222770
[OVER]	GO:0000079	regulation of cyclin-dependent protein serine/threonine kinase activity	BIOLOGICAL_PROCESS	2.01199e-05	1.79288e-06	12	127	3449	222662
[OVER]	GO:0015760	glucose-6-phosphate transport	BIOLOGICAL_PROCESS	2.05995e-05	1.84401e-06	4	3	3457	222786
[OVER]	GO:0015152	glucose-6-phosphate transmembrane transporter activity	MOLECULAR_FUNCTION	2.05995e-05	1.84401e-06	4	3	3457	222786
[OVER]	GO:0019146	arabinose-5-phosphate isomerase activity	MOLECULAR_FUNCTION	2.05995e-05	1.84401e-06	4	3	3457	222786
[OVER]	GO:0042807	central vacuole	CELLULAR_COMPONENT	2.05995e-05	1.84401e-06	4	3	3457	222786
[OVER]	GO:0005199	structural constituent of cell wall	MOLECULAR_FUNCTION	2.13082e-05	1.91092e-06	8	47	3453	222742
[OVER]	GO:0009501	amyloplast	CELLULAR_COMPONENT	2.13082e-05	1.90935e-06	11	105	3450	222684
[OVER]	GO:0015706	nitrate transport	BIOLOGICAL_PROCESS	2.28352e-05	2.05797e-06	21	388	3440	222401
[OVER]	GO:0008361	regulation of cell size	BIOLOGICAL_PROCESS	2.29211e-05	2.06863e-06	15	206	3446	222583
[OVER]	GO:0008526	phosphatidylinositol transfer activity	MOLECULAR_FUNCTION	2.43246e-05	2.20718e-06	5	10	3456	222779
[OVER]	GO:0017040	N-acylsphingosine amidohydrolase activity	MOLECULAR_FUNCTION	2.43246e-05	2.20718e-06	5	10	3456	222779
[OVER]	GO:0047911	galacturan 1,4-alpha-galacturonidase activity	MOLECULAR_FUNCTION	2.52467e-05	2.29908e-06	9	66	3452	222723
[OVER]	GO:0008375	acetylglucosaminyltransferase activity	MOLECULAR_FUNCTION	3.81677e-05	3.51303e-06	14	188	3447	222601
[OVER]	GO:0006218	uridine catabolic process	BIOLOGICAL_PROCESS	3.86189e-05	3.57658e-06	3	0	3458	222789
[OVER]	GO:0090392	sepal giant cell differentiation	BIOLOGICAL_PROCESS	3.86189e-05	3.57658e-06	3	0	3458	222789
[OVER]	GO:0097264	self proteolysis	BIOLOGICAL_PROCESS	3.86189e-05	3.57658e-06	3	0	3458	222789
[OVER]	GO:0072585	xanthosine nucleotidase activity	MOLECULAR_FUNCTION	3.86189e-05	3.57658e-06	3	0	3458	222789
[OVER]	GO:0008120	ceramide glucosyltransferase activity	MOLECULAR_FUNCTION	3.86189e-05	3.57658e-06	3	0	3458	222789
[OVER]	GO:0004398	histidine decarboxylase activity	MOLECULAR_FUNCTION	3.86189e-05	3.57658e-06	3	0	3458	222789
[OVER]	GO:0030008	TRAPP complex	CELLULAR_COMPONENT	3.86189e-05	3.57658e-06	3	0	3458	222789
[OVER]	GO:0051861	glycolipid binding	MOLECULAR_FUNCTION	3.88073e-05	3.60035e-06	6	22	3455	222767
[OVER]	GO:0017089	glycolipid transfer activity	MOLECULAR_FUNCTION	3.88073e-05	3.60035e-06	6	22	3455	222767
[OVER]	GO:0009717	isoflavonoid biosynthetic process	BIOLOGICAL_PROCESS	3.91638e-05	3.643e-06	4	4	3457	222785
[OVER]	GO:0031201	SNARE complex	CELLULAR_COMPONENT	4.15627e-05	3.8763e-06	7	36	3454	222753
[OVER]	GO:0033179	proton-transporting V-type ATPase, V0 domain	CELLULAR_COMPONENT	4.24313e-05	3.96422e-06	9	71	3452	222718
[OVER]	GO:0019632	shikimate metabolic process	BIOLOGICAL_PROCESS	4.7543e-05	4.48052e-06	6	23	3455	222766
[OVER]	GO:0046836	glycolipid transport	BIOLOGICAL_PROCESS	4.7543e-05	4.48052e-06	6	23	3455	222766
[OVER]	GO:0008270	zinc ion binding	MOLECULAR_FUNCTION	4.89076e-05	4.62106e-06	141	6050	3320	216739
[OVER]	GO:0016567	protein ubiquitination	BIOLOGICAL_PROCESS	5.00598e-05	4.73809e-06	50	1550	3411	221239
[OVER]	GO:0009749	response to glucose	BIOLOGICAL_PROCESS	5.6736e-05	5.3977e-06	17	284	3444	222505
[OVER]	GO:0045892	negative regulation of transcription, DNA-templated	BIOLOGICAL_PROCESS	5.67885e-05	5.40733e-06	53	1706	3408	221083
[OVER]	GO:0009055	electron transfer activity	MOLECULAR_FUNCTION	6.147e-05	5.86811e-06	33	858	3428	221931
[OVER]	GO:0042973	glucan endo-1,3-beta-D-glucosidase activity	MOLECULAR_FUNCTION	6.6212e-05	6.33158e-06	10	97	3451	222692
[OVER]	GO:0006606	protein import into nucleus	BIOLOGICAL_PROCESS	6.62274e-05	6.33845e-06	21	419	3440	222370
[OVER]	GO:0051014	actin filament severing	BIOLOGICAL_PROCESS	8.44963e-05	8.12134e-06	5	14	3456	222775
[OVER]	GO:0016328	lateral plasma membrane	CELLULAR_COMPONENT	8.44963e-05	8.12134e-06	5	14	3456	222775
[OVER]	GO:0006047	UDP-N-acetylglucosamine metabolic process	BIOLOGICAL_PROCESS	8.60605e-05	8.2857e-06	7	41	3454	222748
[OVER]	GO:0009684	indoleacetic acid biosynthetic process	BIOLOGICAL_PROCESS	9.01328e-05	8.70714e-06	16	264	3445	222525
[OVER]	GO:0010264	myo-inositol hexakisphosphate biosynthetic process	BIOLOGICAL_PROCESS	9.08802e-05	8.80154e-06	15	234	3446	222555
[OVER]	GO:0045490	pectin catabolic process	BIOLOGICAL_PROCESS	9.18175e-05	8.8998e-06	13	177	3448	222612
[OVER]	GO:0009435	NAD biosynthetic process	BIOLOGICAL_PROCESS	9.97153e-05	9.7303e-06	8	60	3453	222729
[OVER]	GO:0042277	peptide binding	MOLECULAR_FUNCTION	0.000101293	9.92546e-06	12	152	3449	222637
[OVER]	GO:0042802	identical protein binding	MOLECULAR_FUNCTION	0.000105223	1.03278e-05	36	1007	3425	221782
[OVER]	GO:0051016	barbed-end actin filament capping	BIOLOGICAL_PROCESS	0.000108747	1.06913e-05	5	15	3456	222774
[OVER]	GO:0009556	microsporogenesis	BIOLOGICAL_PROCESS	0.000110711	1.09025e-05	14	209	3447	222580
[OVER]	GO:0005769	early endosome	CELLULAR_COMPONENT	0.000110865	1.09447e-05	7	43	3454	222746
[OVER]	GO:0009927	histidine phosphotransfer kinase activity	MOLECULAR_FUNCTION	0.000125868	1.25181e-05	7	44	3454	222745
[OVER]	GO:0009963	positive regulation of flavonoid biosynthetic process	BIOLOGICAL_PROCESS	0.000131275	1.31093e-05	13	184	3448	222605
[OVER]	GO:0030133	transport vesicle	CELLULAR_COMPONENT	0.000137979	1.3835e-05	13	185	3448	222604
[OVER]	GO:0047044	androstan-3-alpha,17-beta-diol dehydrogenase activity	MOLECULAR_FUNCTION	0.000138064	1.38547e-05	5	16	3456	222773
[OVER]	GO:2000121	regulation of removal of superoxide radicals	BIOLOGICAL_PROCESS	0.000140134	1.41423e-05	3	1	3458	222788
[OVER]	GO:0080065	4-alpha-methyl-delta7-sterol oxidation	BIOLOGICAL_PROCESS	0.000140134	1.41423e-05	3	1	3458	222788
[OVER]	GO:0006580	ethanolamine metabolic process	BIOLOGICAL_PROCESS	0.000140134	1.41423e-05	3	1	3458	222788
[OVER]	GO:0047259	glucomannan 4-beta-mannosyltransferase activity	MOLECULAR_FUNCTION	0.000140134	1.41423e-05	3	1	3458	222788
[OVER]	GO:0010318	pyrophosphate-dependent phosphofructokinase complex, beta-subunit complex	CELLULAR_COMPONENT	0.000140134	1.41423e-05	3	1	3458	222788
[OVER]	GO:0010330	cellulose synthase complex	CELLULAR_COMPONENT	0.000140134	1.41423e-05	3	1	3458	222788
[OVER]	GO:0009965	leaf morphogenesis	BIOLOGICAL_PROCESS	0.000151659	1.53549e-05	31	823	3430	221966
[OVER]	GO:0006487	protein N-linked glycosylation	BIOLOGICAL_PROCESS	0.00015459	1.56894e-05	23	519	3438	222270
[OVER]	GO:0005938	cell cortex	CELLULAR_COMPONENT	0.000161255	1.63922e-05	18	344	3443	222445
[OVER]	GO:0005787	signal peptidase complex	CELLULAR_COMPONENT	0.000162453	1.65536e-05	4	7	3457	222782
[OVER]	GO:0006490	oligosaccharide-lipid intermediate biosynthetic process	BIOLOGICAL_PROCESS	0.000164394	1.67648e-05	6	30	3455	222759
[OVER]	GO:0009631	cold acclimation	BIOLOGICAL_PROCESS	0.000170903	1.74842e-05	10	110	3451	222679
[OVER]	GO:0019375	galactolipid biosynthetic process	BIOLOGICAL_PROCESS	0.00018502	1.89587e-05	18	348	3443	222441
[OVER]	GO:0047513	1,2-alpha-L-fucosidase activity	MOLECULAR_FUNCTION	0.000216755	2.23341e-05	5	18	3456	222771
[OVER]	GO:0042542	response to hydrogen peroxide	BIOLOGICAL_PROCESS	0.000220015	2.26879e-05	23	532	3438	222257
[OVER]	GO:0006564	L-serine biosynthetic process	BIOLOGICAL_PROCESS	0.000223953	2.31487e-05	6	32	3455	222757
[OVER]	GO:0004647	phosphoserine phosphatase activity	MOLECULAR_FUNCTION	0.000223953	2.31487e-05	6	32	3455	222757
[OVER]	GO:0008137	NADH dehydrogenase (ubiquinone) activity	MOLECULAR_FUNCTION	0.000230257	2.38378e-05	12	167	3449	222622
[OVER]	GO:0004842	ubiquitin-protein transferase activity	MOLECULAR_FUNCTION	0.000230864	2.39194e-05	34	967	3427	221822
[OVER]	GO:0043085	positive regulation of catalytic activity	BIOLOGICAL_PROCESS	0.000251848	2.61346e-05	50	1665	3411	221124
[OVER]	GO:0006002	fructose 6-phosphate metabolic process	BIOLOGICAL_PROCESS	0.000254101	2.63926e-05	7	50	3454	222739
[OVER]	GO:0010051	xylem and phloem pattern formation	BIOLOGICAL_PROCESS	0.000254101	2.64098e-05	19	392	3442	222397
[OVER]	GO:0000326	protein storage vacuole	CELLULAR_COMPONENT	0.000267584	2.78548e-05	5	19	3456	222770
[OVER]	GO:0004722	protein serine/threonine phosphatase activity	MOLECULAR_FUNCTION	0.000271403	2.82965e-05	24	578	3437	222211
[OVER]	GO:0000919	cell plate assembly	BIOLOGICAL_PROCESS	0.000283642	2.96187e-05	7	51	3454	222738
[OVER]	GO:0009073	aromatic amino acid family biosynthetic process	BIOLOGICAL_PROCESS	0.000307886	3.22758e-05	17	329	3444	222460
[OVER]	GO:0009535	chloroplast thylakoid membrane	CELLULAR_COMPONENT	0.000327102	3.43434e-05	49	1635	3412	221154
[OVER]	GO:0047036	codeinone reductase (NADPH) activity	MOLECULAR_FUNCTION	0.000327181	3.43784e-05	5	20	3456	222769
[OVER]	GO:2000014	regulation of endosperm development	BIOLOGICAL_PROCESS	0.000331089	3.49509e-05	3	2	3458	222787
[OVER]	GO:0080064	4,4-dimethyl-9beta,19-cyclopropylsterol oxidation	BIOLOGICAL_PROCESS	0.000331089	3.49509e-05	3	2	3458	222787
[OVER]	GO:0045437	uridine nucleosidase activity	MOLECULAR_FUNCTION	0.000331089	3.49509e-05	3	2	3458	222787
[OVER]	GO:0045492	xylan biosynthetic process	BIOLOGICAL_PROCESS	0.000332168	3.50918e-05	23	548	3438	222241
[OVER]	GO:0004575	sucrose alpha-glucosidase activity	MOLECULAR_FUNCTION	0.000342124	3.62551e-05	6	35	3455	222754
[OVER]	GO:0071806	protein transmembrane transport	BIOLOGICAL_PROCESS	0.000344215	3.65047e-05	28	736	3433	222053
[OVER]	GO:0006569	tryptophan catabolic process	BIOLOGICAL_PROCESS	0.000348365	3.70015e-05	14	235	3447	222554
[OVER]	GO:0045595	regulation of cell differentiation	BIOLOGICAL_PROCESS	0.000350372	3.72433e-05	17	333	3444	222456
[OVER]	GO:1902600	proton transmembrane transport	BIOLOGICAL_PROCESS	0.000360143	3.83406e-05	47	1564	3414	221225
[OVER]	GO:0010005	cortical microtubule, transverse to long axis	CELLULAR_COMPONENT	0.000392957	4.20259e-05	5	21	3456	222768
[OVER]	GO:0009926	auxin polar transport	BIOLOGICAL_PROCESS	0.000424175	4.55028e-05	19	409	3442	222380
[OVER]	GO:0015250	water channel activity	MOLECULAR_FUNCTION	0.00042758	4.59377e-05	7	55	3454	222734
[OVER]	GO:0006633	fatty acid biosynthetic process	BIOLOGICAL_PROCESS	0.000452643	4.88516e-05	31	867	3430	221922
[OVER]	GO:0009860	pollen tube growth	BIOLOGICAL_PROCESS	0.000472458	5.10287e-05	22	524	3439	222265
[OVER]	GO:0009060	aerobic respiration	BIOLOGICAL_PROCESS	0.000476742	5.1569e-05	25	641	3436	222148
[OVER]	GO:0005509	calcium ion binding	MOLECULAR_FUNCTION	0.000516044	5.62407e-05	34	1000	3427	221789
[OVER]	GO:0019745	pentacyclic triterpenoid biosynthetic process	BIOLOGICAL_PROCESS	0.000522891	5.71573e-05	11	155	3450	222634
[OVER]	GO:0004650	polygalacturonase activity	MOLECULAR_FUNCTION	0.000531101	5.81412e-05	10	128	3451	222661
[OVER]	GO:0001558	regulation of cell growth	BIOLOGICAL_PROCESS	0.000532922	5.83839e-05	17	346	3444	222443
[OVER]	GO:0034051	negative regulation of plant-type hypersensitive response	BIOLOGICAL_PROCESS	0.000557511	6.12141e-05	5	23	3456	222766
[OVER]	GO:0009961	response to 1-aminocyclopropane-1-carboxylic acid	BIOLOGICAL_PROCESS	0.000557511	6.12141e-05	5	23	3456	222766
[OVER]	GO:0033808	6'-deoxychalcone synthase activity	MOLECULAR_FUNCTION	0.000557511	6.12141e-05	5	23	3456	222766
[OVER]	GO:0043622	cortical microtubule organization	BIOLOGICAL_PROCESS	0.000590729	6.50539e-05	9	104	3452	222685
[OVER]	GO:0016482	cytosolic transport	BIOLOGICAL_PROCESS	0.000590729	6.50539e-05	9	104	3452	222685
[OVER]	GO:0000025	maltose catabolic process	BIOLOGICAL_PROCESS	0.000591171	6.51988e-05	4	11	3457	222778
[OVER]	GO:0046592	polyamine oxidase activity	MOLECULAR_FUNCTION	0.000591171	6.51988e-05	4	11	3457	222778
[OVER]	GO:0010498	proteasomal protein catabolic process	BIOLOGICAL_PROCESS	0.000622219	6.91298e-05	31	894	3430	221895
[OVER]	GO:0019853	L-ascorbic acid biosynthetic process	BIOLOGICAL_PROCESS	0.000622219	6.8983e-05	7	59	3454	222730
[OVER]	GO:0050379	UDP-glucuronate 5'-epimerase activity	MOLECULAR_FUNCTION	0.000622219	6.91017e-05	3	3	3458	222786
[OVER]	GO:1990135	flavonoid sulfotransferase activity	MOLECULAR_FUNCTION	0.000622219	6.91017e-05	3	3	3458	222786
[OVER]	GO:0004198	calcium-dependent cysteine-type endopeptidase activity	MOLECULAR_FUNCTION	0.000622219	6.91017e-05	3	3	3458	222786
[OVER]	GO:0034722	gamma-glutamyl-peptidase activity	MOLECULAR_FUNCTION	0.000622219	6.91017e-05	3	3	3458	222786
[OVER]	GO:0015018	galactosylgalactosylxylosylprotein 3-beta-glucuronosyltransferase activity	MOLECULAR_FUNCTION	0.000622219	6.91017e-05	3	3	3458	222786
[OVER]	GO:0004712	protein serine/threonine/tyrosine kinase activity	MOLECULAR_FUNCTION	0.00063423	7.05676e-05	16	317	3445	222472
[OVER]	GO:0010413	glucuronoxylan metabolic process	BIOLOGICAL_PROCESS	0.000644006	7.17602e-05	22	537	3439	222252
[OVER]	GO:0003993	acid phosphatase activity	MOLECULAR_FUNCTION	0.000669786	7.4774e-05	13	220	3448	222569
[OVER]	GO:0016810	hydrolase activity, acting on carbon-nitrogen (but not peptide) bonds	MOLECULAR_FUNCTION	0.000669786	7.47965e-05	27	733	3434	222056
[OVER]	GO:0005801	cis-Golgi network	CELLULAR_COMPONENT	0.000680208	7.60157e-05	7	60	3454	222729
[OVER]	GO:0032880	regulation of protein localization	BIOLOGICAL_PROCESS	0.000728198	8.14974e-05	13	222	3448	222567
[OVER]	GO:0051753	mannan synthase activity	MOLECULAR_FUNCTION	0.000765642	8.58751e-05	4	12	3457	222777
[OVER]	GO:0002020	protease binding	MOLECULAR_FUNCTION	0.000765642	8.58751e-05	4	12	3457	222777
[OVER]	GO:0004506	squalene monooxygenase activity	MOLECULAR_FUNCTION	0.000770404	8.65347e-05	5	25	3456	222764
[OVER]	GO:0006325	chromatin organization	BIOLOGICAL_PROCESS	0.000777109	8.73512e-05	74	2918	3387	219871
[OVER]	GO:0004579	dolichyl-diphosphooligosaccharide-protein glycotransferase activity	MOLECULAR_FUNCTION	0.000801779	9.03202e-05	6	42	3455	222747
[OVER]	GO:0006909	phagocytosis	BIOLOGICAL_PROCESS	0.000814659	9.18375e-05	7	62	3454	222727
[OVER]	GO:0009644	response to high light intensity	BIOLOGICAL_PROCESS	0.000836403	9.43568e-05	26	701	3435	222088
[OVER]	GO:0016036	cellular response to phosphate starvation	BIOLOGICAL_PROCESS	0.000856275	9.66683e-05	21	510	3440	222279
[OVER]	GO:0006646	phosphatidylethanolamine biosynthetic process	BIOLOGICAL_PROCESS	0.000897216	0.000101875	5	26	3456	222763
[OVER]	GO:0009828	plant-type cell wall loosening	BIOLOGICAL_PROCESS	0.000897216	0.000101875	5	26	3456	222763
[OVER]	GO:0048354	mucilage biosynthetic process involved in seed coat development	BIOLOGICAL_PROCESS	0.000897216	0.000101875	5	26	3456	222763
[OVER]	GO:0016207	4-coumarate-CoA ligase activity	MOLECULAR_FUNCTION	0.000897216	0.000101592	6	43	3455	222746
[OVER]	GO:0030173	integral component of Golgi membrane	CELLULAR_COMPONENT	0.000897216	0.000101875	5	26	3456	222763
[OVER]	GO:0090406	pollen tube	CELLULAR_COMPONENT	0.000939259	0.000106802	11	167	3450	222622
[OVER]	GO:0006094	gluconeogenesis	BIOLOGICAL_PROCESS	0.000967673	0.000110112	26	710	3435	222079
[OVER]	GO:0031012	extracellular matrix	CELLULAR_COMPONENT	0.000968114	0.000110241	7	64	3454	222725
[OVER]	GO:0060147	regulation of posttranscriptional gene silencing	BIOLOGICAL_PROCESS	0.000973508	0.000110934	4	13	3457	222776
[OVER]	GO:0016197	endosomal transport	BIOLOGICAL_PROCESS	0.000976126	0.000111391	12	198	3449	222591
[OVER]	GO:0002758	innate immune response-activating signal transduction	BIOLOGICAL_PROCESS	0.00102902	0.000117595	9	113	3452	222676
[OVER]	GO:0007021	tubulin complex assembly	BIOLOGICAL_PROCESS	0.00103575	0.000119219	5	27	3456	222762
[OVER]	GO:0010215	cellulose microfibril organization	BIOLOGICAL_PROCESS	0.00103575	0.000119219	5	27	3456	222762
[OVER]	GO:2000011	regulation of adaxial/abaxial pattern formation	BIOLOGICAL_PROCESS	0.00103575	0.000119545	3	4	3458	222785
[OVER]	GO:0042351	'de novo' GDP-L-fucose biosynthetic process	BIOLOGICAL_PROCESS	0.00103575	0.000119545	3	4	3458	222785
[OVER]	GO:0015783	GDP-fucose transmembrane transport	BIOLOGICAL_PROCESS	0.00103575	0.000119545	3	4	3458	222785
[OVER]	GO:1990388	xylem-to-phloem iron transport	BIOLOGICAL_PROCESS	0.00103575	0.000119545	3	4	3458	222785
[OVER]	GO:0000062	fatty-acyl-CoA binding	MOLECULAR_FUNCTION	0.00103575	0.000119219	5	27	3456	222762
[OVER]	GO:0005457	GDP-fucose transmembrane transporter activity	MOLECULAR_FUNCTION	0.00103575	0.000119545	3	4	3458	222785
[OVER]	GO:0047681	aryl-alcohol dehydrogenase (NADP+) activity	MOLECULAR_FUNCTION	0.00103575	0.000119545	3	4	3458	222785
[OVER]	GO:0008290	F-actin capping protein complex	CELLULAR_COMPONENT	0.00103575	0.000119545	3	4	3458	222785
[OVER]	GO:0002238	response to molecule of fungal origin	BIOLOGICAL_PROCESS	0.00104186	0.000120505	7	65	3454	222724
[OVER]	GO:0035252	UDP-xylosyltransferase activity	MOLECULAR_FUNCTION	0.00109828	0.000127478	6	45	3455	222744
[OVER]	GO:0030663	COPI-coated vesicle membrane	CELLULAR_COMPONENT	0.00109828	0.000127478	6	45	3455	222744
[OVER]	GO:0010106	cellular response to iron ion starvation	BIOLOGICAL_PROCESS	0.00111657	0.000129965	11	171	3450	222618
[OVER]	GO:0030134	COPII-coated ER to Golgi transport vesicle	CELLULAR_COMPONENT	0.00112924	0.000131532	7	66	3454	222723
[OVER]	GO:0047077	Photinus-luciferin 4-monooxygenase (ATP-hydrolyzing) activity	MOLECULAR_FUNCTION	0.00121526	0.000142243	6	46	3455	222743
[OVER]	GO:0007062	sister chromatid cohesion	BIOLOGICAL_PROCESS	0.00128763	0.000151239	25	683	3436	222106
[OVER]	GO:0009660	amyloplast organization	BIOLOGICAL_PROCESS	0.00136551	0.000160609	5	29	3456	222760
[OVER]	GO:0018108	peptidyl-tyrosine phosphorylation	BIOLOGICAL_PROCESS	0.00142599	0.000167955	31	933	3430	221856
[OVER]	GO:0010017	red or far-red light signaling pathway	BIOLOGICAL_PROCESS	0.00145693	0.000171955	12	208	3449	222581
[OVER]	GO:0015713	phosphoglycerate transmembrane transport	BIOLOGICAL_PROCESS	0.00148763	0.000176305	4	15	3457	222774
[OVER]	GO:0019354	siroheme biosynthetic process	BIOLOGICAL_PROCESS	0.00148763	0.000176305	4	15	3457	222774
[OVER]	GO:0015120	phosphoglycerate transmembrane transporter activity	MOLECULAR_FUNCTION	0.00148763	0.000176305	4	15	3457	222774
[OVER]	GO:0070417	cellular response to cold	BIOLOGICAL_PROCESS	0.00151496	0.000179668	9	120	3452	222669
[OVER]	GO:0006284	base-excision repair	BIOLOGICAL_PROCESS	0.00160131	0.00019043	9	121	3452	222668
[OVER]	GO:0006875	cellular metal ion homeostasis	BIOLOGICAL_PROCESS	0.00170098	0.000202976	23	604	3438	222185
[OVER]	GO:0006862	nucleotide transport	BIOLOGICAL_PROCESS	0.0017346	0.000207553	16	350	3445	222439
[OVER]	GO:0050661	NADP binding	MOLECULAR_FUNCTION	0.0017346	0.000207553	16	350	3445	222439
[OVER]	GO:0035436	triose phosphate transmembrane transport	BIOLOGICAL_PROCESS	0.0018133	0.000217708	4	16	3457	222773
[OVER]	GO:0004134	4-alpha-glucanotransferase activity	MOLECULAR_FUNCTION	0.0018133	0.000217708	4	16	3457	222773
[OVER]	GO:0071917	triose-phosphate transmembrane transporter activity	MOLECULAR_FUNCTION	0.0018133	0.000217708	4	16	3457	222773
[OVER]	GO:0004185	serine-type carboxypeptidase activity	MOLECULAR_FUNCTION	0.00184064	0.000221141	13	247	3448	222542
[OVER]	GO:0030327	prenylated protein catabolic process	BIOLOGICAL_PROCESS	0.00193275	0.000233939	2	0	3459	222789
[OVER]	GO:0006858	extracellular transport	BIOLOGICAL_PROCESS	0.00193275	0.000233939	2	0	3459	222789
[OVER]	GO:0009640	photomorphogenesis	BIOLOGICAL_PROCESS	0.00193275	0.000233171	30	907	3431	221882
[OVER]	GO:0050343	trans-2-enoyl-CoA reductase (NAD+) activity	MOLECULAR_FUNCTION	0.00193275	0.000233939	2	0	3459	222789
[OVER]	GO:0009673	low-affinity phosphate transmembrane transporter activity	MOLECULAR_FUNCTION	0.00193275	0.000233939	2	0	3459	222789
[OVER]	GO:0033881	bile-acid-CoA hydrolase activity	MOLECULAR_FUNCTION	0.00193275	0.000233939	2	0	3459	222789
[OVER]	GO:0010317	pyrophosphate-dependent phosphofructokinase complex, alpha-subunit complex	CELLULAR_COMPONENT	0.00193275	0.000233939	2	0	3459	222789
[OVER]	GO:0016042	lipid catabolic process	BIOLOGICAL_PROCESS	0.0019572	0.000237058	43	1502	3418	221287
[OVER]	GO:0047213	anthocyanidin 3-O-glucosyltransferase activity	MOLECULAR_FUNCTION	0.00203709	0.000247066	13	250	3448	222539
[OVER]	GO:0050897	cobalt ion binding	MOLECULAR_FUNCTION	0.00204009	0.000247596	11	185	3450	222604
[OVER]	GO:0070069	cytochrome complex	CELLULAR_COMPONENT	0.00212405	0.000258651	11	186	3450	222603
[OVER]	GO:0009831	plant-type cell wall modification involved in multidimensional cell growth	BIOLOGICAL_PROCESS	0.00217223	0.000265674	4	17	3457	222772
[OVER]	GO:0048280	vesicle fusion with Golgi apparatus	BIOLOGICAL_PROCESS	0.00217223	0.000265674	4	17	3457	222772
[OVER]	GO:0035445	borate transmembrane transport	BIOLOGICAL_PROCESS	0.00217223	0.000265674	4	17	3457	222772
[OVER]	GO:0030795	jasmonate O-methyltransferase activity	MOLECULAR_FUNCTION	0.00217223	0.000265674	4	17	3457	222772
[OVER]	GO:0000266	mitochondrial fission	BIOLOGICAL_PROCESS	0.00224517	0.000275412	5	33	3456	222756
[OVER]	GO:0008184	glycogen phosphorylase activity	MOLECULAR_FUNCTION	0.00224517	0.000275412	5	33	3456	222756
[OVER]	GO:0010289	homogalacturonan biosynthetic process	BIOLOGICAL_PROCESS	0.00227518	0.00028039	3	6	3458	222783
[OVER]	GO:0097503	sialylation	BIOLOGICAL_PROCESS	0.00227518	0.00028039	3	6	3458	222783
[OVER]	GO:0019305	dTDP-rhamnose biosynthetic process	BIOLOGICAL_PROCESS	0.00227518	0.00028039	3	6	3458	222783
[OVER]	GO:0008373	sialyltransferase activity	MOLECULAR_FUNCTION	0.00227518	0.00028039	3	6	3458	222783
[OVER]	GO:0010089	xylem development	BIOLOGICAL_PROCESS	0.00245113	0.000302473	12	222	3449	222567
[OVER]	GO:0018208	peptidyl-proline modification	BIOLOGICAL_PROCESS	0.00257426	0.000318507	17	402	3444	222387
[OVER]	GO:0034052	positive regulation of plant-type hypersensitive response	BIOLOGICAL_PROCESS	0.00258752	0.000320779	4	18	3457	222771
[OVER]	GO:0015714	phosphoenolpyruvate transport	BIOLOGICAL_PROCESS	0.00258752	0.000320779	4	18	3457	222771
[OVER]	GO:0046910	pectinesterase inhibitor activity	MOLECULAR_FUNCTION	0.00258752	0.000320779	4	18	3457	222771
[OVER]	GO:0010310	regulation of hydrogen peroxide metabolic process	BIOLOGICAL_PROCESS	0.00263649	0.00032728	17	403	3444	222386
[OVER]	GO:0015791	polyol transport	BIOLOGICAL_PROCESS	0.00276968	0.000345166	6	55	3455	222734
[OVER]	GO:0072488	ammonium transmembrane transport	BIOLOGICAL_PROCESS	0.00276968	0.000345166	6	55	3455	222734
[OVER]	GO:0048573	photoperiodism, flowering	BIOLOGICAL_PROCESS	0.00279226	0.000348208	22	593	3439	222196
[OVER]	GO:0005544	calcium-dependent phospholipid binding	MOLECULAR_FUNCTION	0.00281919	0.000352026	5	35	3456	222754
[OVER]	GO:0071918	urea transmembrane transport	BIOLOGICAL_PROCESS	0.00305618	0.000383609	4	19	3457	222770
[OVER]	GO:0000221	vacuolar proton-transporting V-type ATPase, V1 domain	CELLULAR_COMPONENT	0.00305618	0.000383609	4	19	3457	222770
[OVER]	GO:0005777	peroxisome	CELLULAR_COMPONENT	0.00306914	0.000385736	34	1115	3427	221674
[OVER]	GO:0009260	ribonucleotide biosynthetic process	BIOLOGICAL_PROCESS	0.00310015	0.000390138	41	1439	3420	221350
[OVER]	GO:0008794	arsenate reductase (glutaredoxin) activity	MOLECULAR_FUNCTION	0.00313648	0.000395987	3	7	3458	222782
[OVER]	GO:0016790	thiolester hydrolase activity	MOLECULAR_FUNCTION	0.00338444	0.000427845	9	136	3452	222653
[OVER]	GO:0009939	positive regulation of gibberellic acid mediated signaling pathway	BIOLOGICAL_PROCESS	0.00359272	0.00045476	4	20	3457	222769
[OVER]	GO:0016413	O-acetyltransferase activity	MOLECULAR_FUNCTION	0.00366019	0.000464492	8	109	3453	222680
[OVER]	GO:0008320	protein transmembrane transporter activity	MOLECULAR_FUNCTION	0.00366019	0.000464492	8	109	3453	222680
[OVER]	GO:0042537	benzene-containing compound metabolic process	BIOLOGICAL_PROCESS	0.00386556	0.000490869	26	786	3435	222003
[OVER]	GO:0009173	pyrimidine ribonucleoside monophosphate metabolic process	BIOLOGICAL_PROCESS	0.00386677	0.000491654	8	110	3453	222679
[OVER]	GO:0009959	negative gravitropism	BIOLOGICAL_PROCESS	0.0038921	0.000495825	5	38	3456	222751
[OVER]	GO:0004629	phospholipase C activity	MOLECULAR_FUNCTION	0.0038921	0.000495825	5	38	3456	222751
[OVER]	GO:0009718	anthocyanin-containing compound biosynthetic process	BIOLOGICAL_PROCESS	0.00409023	0.000521398	9	140	3452	222649
[OVER]	GO:0005460	UDP-glucose transmembrane transporter activity	MOLECULAR_FUNCTION	0.00419294	0.000534832	4	21	3457	222768
[OVER]	GO:0004715	non-membrane spanning protein tyrosine kinase activity	MOLECULAR_FUNCTION	0.00419996	0.00053607	25	743	3436	222046
[OVER]	GO:0032877	positive regulation of DNA endoreduplication	BIOLOGICAL_PROCESS	0.00420115	0.000538275	3	8	3458	222781
[OVER]	GO:0048531	beta-1,3-galactosyltransferase activity	MOLECULAR_FUNCTION	0.00420115	0.000538275	3	8	3458	222781
[OVER]	GO:0050665	hydrogen peroxide biosynthetic process	BIOLOGICAL_PROCESS	0.00449811	0.000577789	15	348	3446	222441
[OVER]	GO:0048441	petal development	BIOLOGICAL_PROCESS	0.00454614	0.000585811	12	240	3449	222549
[OVER]	GO:0009880	embryonic pattern specification	BIOLOGICAL_PROCESS	0.00470828	0.000607087	11	207	3450	222582
[OVER]	GO:0005315	inorganic phosphate transmembrane transporter activity	MOLECULAR_FUNCTION	0.00481043	0.000621434	6	62	3455	222727
[OVER]	GO:0006014	D-ribose metabolic process	BIOLOGICAL_PROCESS	0.00482756	0.000624434	4	22	3457	222767
[OVER]	GO:0004747	ribokinase activity	MOLECULAR_FUNCTION	0.00482756	0.000624434	4	22	3457	222767
[OVER]	GO:0043086	negative regulation of catalytic activity	BIOLOGICAL_PROCESS	0.00483127	0.000625307	16	389	3445	222400
[OVER]	GO:0016409	palmitoyltransferase activity	MOLECULAR_FUNCTION	0.00486984	0.000631092	9	144	3452	222645
[OVER]	GO:0050660	flavin adenine dinucleotide binding	MOLECULAR_FUNCTION	0.00494118	0.000640739	25	756	3436	222033
[OVER]	GO:0098754	detoxification	BIOLOGICAL_PROCESS	0.00515189	0.000669741	24	708	3437	222081
[OVER]	GO:0051607	defense response to virus	BIOLOGICAL_PROCESS	0.00526443	0.000693482	24	711	3437	222078
[OVER]	GO:1903866	palisade mesophyll development	BIOLOGICAL_PROCESS	0.00526443	0.000694664	2	1	3459	222788
[OVER]	GO:0071229	cellular response to acid chemical	BIOLOGICAL_PROCESS	0.00526443	0.000693811	16	393	3445	222396
[OVER]	GO:0032960	regulation of inositol trisphosphate biosynthetic process	BIOLOGICAL_PROCESS	0.00526443	0.000694664	2	1	3459	222788
[OVER]	GO:0097623	potassium ion export across plasma membrane	BIOLOGICAL_PROCESS	0.00526443	0.000694664	2	1	3459	222788
[OVER]	GO:0090603	sieve element differentiation	BIOLOGICAL_PROCESS	0.00526443	0.000694664	2	1	3459	222788
[OVER]	GO:0015871	choline transport	BIOLOGICAL_PROCESS	0.00526443	0.000694664	2	1	3459	222788
[OVER]	GO:0047150	betaine-homocysteine S-methyltransferase activity	MOLECULAR_FUNCTION	0.00526443	0.000694664	2	1	3459	222788
[OVER]	GO:0033818	beta-ketoacyl-acyl-carrier-protein synthase III activity	MOLECULAR_FUNCTION	0.00526443	0.000694664	2	1	3459	222788
[OVER]	GO:0015220	choline transmembrane transporter activity	MOLECULAR_FUNCTION	0.00526443	0.000694664	2	1	3459	222788
[OVER]	GO:0047750	cholestenol delta-isomerase activity	MOLECULAR_FUNCTION	0.00526443	0.000694664	2	1	3459	222788
[OVER]	GO:0000247	C-8 sterol isomerase activity	MOLECULAR_FUNCTION	0.00526443	0.000694664	2	1	3459	222788
[OVER]	GO:0048307	ferredoxin-nitrite reductase activity	MOLECULAR_FUNCTION	0.00526443	0.000694664	2	1	3459	222788
[OVER]	GO:0043674	columella	CELLULAR_COMPONENT	0.00526443	0.000694664	2	1	3459	222788
[OVER]	GO:0097218	sieve plate	CELLULAR_COMPONENT	0.00526443	0.000694664	2	1	3459	222788
[OVER]	GO:0044214	spanning component of plasma membrane	CELLULAR_COMPONENT	0.00526443	0.000694664	2	1	3459	222788
[OVER]	GO:0016255	attachment of GPI anchor to protein	BIOLOGICAL_PROCESS	0.00535721	0.000709524	3	9	3458	222780
[OVER]	GO:0008506	sucrose:proton symporter activity	MOLECULAR_FUNCTION	0.00535721	0.000709524	3	9	3458	222780
[OVER]	GO:0004689	phosphorylase kinase activity	MOLECULAR_FUNCTION	0.00535721	0.000709524	3	9	3458	222780
[OVER]	GO:0009930	longitudinal side of cell surface	CELLULAR_COMPONENT	0.00535721	0.000709524	3	9	3458	222780
[OVER]	GO:0031902	late endosome membrane	CELLULAR_COMPONENT	0.00535852	0.000710134	7	89	3454	222700
[OVER]	GO:0009887	animal organ morphogenesis	BIOLOGICAL_PROCESS	0.00536858	0.000711904	16	394	3445	222395
[OVER]	GO:0060151	peroxisome localization	BIOLOGICAL_PROCESS	0.00542566	0.000719915	8	117	3453	222672
[OVER]	GO:0007219	Notch signaling pathway	BIOLOGICAL_PROCESS	0.00545106	0.000724174	4	23	3457	222766
[OVER]	GO:0015786	UDP-glucose transmembrane transport	BIOLOGICAL_PROCESS	0.00545106	0.000724174	4	23	3457	222766
[OVER]	GO:0033926	glycopeptide alpha-N-acetylgalactosaminidase activity	MOLECULAR_FUNCTION	0.00627124	0.000834667	4	24	3457	222765
[OVER]	GO:0051645	Golgi localization	BIOLOGICAL_PROCESS	0.00630534	0.000840747	8	120	3453	222669
[OVER]	GO:0006108	malate metabolic process	BIOLOGICAL_PROCESS	0.00630534	0.000840747	8	120	3453	222669
[OVER]	GO:0015095	magnesium ion transmembrane transporter activity	MOLECULAR_FUNCTION	0.00630534	0.000840747	8	120	3453	222669
[OVER]	GO:0031312	extrinsic component of organelle membrane	CELLULAR_COMPONENT	0.00631358	0.000842359	6	66	3455	222723
[OVER]	GO:0044786	cell cycle DNA replication	BIOLOGICAL_PROCESS	0.00634456	0.00084701	15	362	3446	222427
[OVER]	GO:0005338	nucleotide-sugar transmembrane transporter activity	MOLECULAR_FUNCTION	0.00638266	0.000852615	7	92	3454	222697
[OVER]	GO:0070207	protein homotrimerization	BIOLOGICAL_PROCESS	0.00678084	0.000911882	3	10	3458	222779
[OVER]	GO:0008898	S-adenosylmethionine-homocysteine S-methyltransferase activity	MOLECULAR_FUNCTION	0.00678084	0.000911882	3	10	3458	222779
[OVER]	GO:0004128	cytochrome-b5 reductase activity, acting on NAD(P)H	MOLECULAR_FUNCTION	0.00678084	0.000911882	3	10	3458	222779
[OVER]	GO:0005200	structural constituent of cytoskeleton	MOLECULAR_FUNCTION	0.00678084	0.000908444	11	218	3450	222571
[OVER]	GO:0047012	sterol-4-alpha-carboxylate 3-dehydrogenase (decarboxylating) activity	MOLECULAR_FUNCTION	0.00678084	0.000911882	3	10	3458	222779
[OVER]	GO:0042765	GPI-anchor transamidase complex	CELLULAR_COMPONENT	0.00678084	0.000911882	3	10	3458	222779
[OVER]	GO:0006354	DNA-templated transcription, elongation	BIOLOGICAL_PROCESS	0.00697685	0.000941082	11	219	3450	222570
[OVER]	GO:0042344	indole glucosinolate catabolic process	BIOLOGICAL_PROCESS	0.00707002	0.000956529	4	25	3457	222764
[OVER]	GO:0008113	peptide-methionine (S)-S-oxide reductase activity	MOLECULAR_FUNCTION	0.00707002	0.000956529	4	25	3457	222764
[OVER]	GO:0004321	fatty-acyl-CoA synthase activity	MOLECULAR_FUNCTION	0.00707002	0.000956529	4	25	3457	222764
[OVER]	GO:0019932	second-messenger-mediated signaling	BIOLOGICAL_PROCESS	0.00714357	0.000967643	12	255	3449	222534
[OVER]	GO:0006022	aminoglycan metabolic process	BIOLOGICAL_PROCESS	0.00717676	0.000973308	6	68	3455	222721
[OVER]	GO:0045727	positive regulation of translation	BIOLOGICAL_PROCESS	0.00718259	0.000974684	11	220	3450	222569
[OVER]	GO:0016615	malate dehydrogenase activity	MOLECULAR_FUNCTION	0.00756066	0.0010266	8	124	3453	222665
[OVER]	GO:0010224	response to UV-B	BIOLOGICAL_PROCESS	0.00769452	0.00104603	13	294	3448	222495
[OVER]	GO:0033612	receptor serine/threonine kinase binding	MOLECULAR_FUNCTION	0.00790531	0.00107662	7	96	3454	222693
[OVER]	GO:0015693	magnesium ion transport	BIOLOGICAL_PROCESS	0.00790956	0.00107784	8	125	3453	222664
[OVER]	GO:0010582	floral meristem determinacy	BIOLOGICAL_PROCESS	0.00799876	0.00109391	5	46	3456	222743
[OVER]	GO:0009200	deoxyribonucleoside triphosphate metabolic process	BIOLOGICAL_PROCESS	0.00835489	0.00114738	3	11	3458	222778
[OVER]	GO:0080029	cellular response to boron-containing substance levels	BIOLOGICAL_PROCESS	0.00835489	0.00114738	3	11	3458	222778
[OVER]	GO:0004055	argininosuccinate synthase activity	MOLECULAR_FUNCTION	0.00835489	0.00114738	3	11	3458	222778
[OVER]	GO:0018849	muconate cycloisomerase activity	MOLECULAR_FUNCTION	0.00835489	0.00114738	3	11	3458	222778
[OVER]	GO:0008107	galactoside 2-alpha-L-fucosyltransferase activity	MOLECULAR_FUNCTION	0.00835489	0.00114738	3	11	3458	222778
[OVER]	GO:0030145	manganese ion binding	MOLECULAR_FUNCTION	0.00853417	0.00117269	9	158	3452	222631
[OVER]	GO:0015166	polyol transmembrane transporter activity	MOLECULAR_FUNCTION	0.00869245	0.00119515	5	47	3456	222742
[OVER]	GO:0009423	chorismate biosynthetic process	BIOLOGICAL_PROCESS	0.00897955	0.00123682	4	27	3457	222762
[OVER]	GO:0009897	external side of plasma membrane	CELLULAR_COMPONENT	0.00897955	0.00123682	4	27	3457	222762
[OVER]	GO:0005730	nucleolus	CELLULAR_COMPONENT	0.00898654	0.00123851	43	1626	3418	221163
[OVER]	GO:0009787	regulation of abscisic acid-activated signaling pathway	BIOLOGICAL_PROCESS	0.0090064	0.00124419	12	263	3449	222526
[OVER]	GO:0016762	xyloglucan:xyloglucosyl transferase activity	MOLECULAR_FUNCTION	0.00925556	0.00128162	6	72	3455	222717
[OVER]	GO:0031559	oxidosqualene cyclase activity	MOLECULAR_FUNCTION	0.00925556	0.00128162	6	72	3455	222717
[OVER]	GO:0006233	dTDP biosynthetic process	BIOLOGICAL_PROCESS	0.00981008	0.00137518	2	2	3459	222787
[OVER]	GO:0043182	vacuolar sequestering of sodium ion	BIOLOGICAL_PROCESS	0.00981008	0.00137518	2	2	3459	222787
[OVER]	GO:0007202	activation of phospholipase C activity	BIOLOGICAL_PROCESS	0.00981008	0.00137518	2	2	3459	222787
[OVER]	GO:0042355	L-fucose catabolic process	BIOLOGICAL_PROCESS	0.00981008	0.00137518	2	2	3459	222787
[OVER]	GO:0006567	threonine catabolic process	BIOLOGICAL_PROCESS	0.00981008	0.0013655	8	130	3453	222659
[OVER]	GO:0033840	NDP-glucose-starch glucosyltransferase activity	MOLECULAR_FUNCTION	0.00981008	0.00137518	2	2	3459	222787
[OVER]	GO:0080118	brassinosteroid sulfotransferase activity	MOLECULAR_FUNCTION	0.00981008	0.00137518	2	2	3459	222787
[OVER]	GO:0017083	4-galactosyl-N-acetylglucosaminide 3-alpha-L-fucosyltransferase activity	MOLECULAR_FUNCTION	0.00981008	0.00137518	2	2	3459	222787
[OVER]	GO:0005201	extracellular matrix structural constituent	MOLECULAR_FUNCTION	0.00981008	0.00137518	2	2	3459	222787
[OVER]	GO:0004798	thymidylate kinase activity	MOLECULAR_FUNCTION	0.00981008	0.00137518	2	2	3459	222787
[OVER]	GO:0006657	CDP-choline pathway	BIOLOGICAL_PROCESS	0.00993886	0.00139648	4	28	3457	222761
[OVER]	GO:0000210	NAD+ diphosphatase activity	MOLECULAR_FUNCTION	0.00993886	0.00139648	4	28	3457	222761

## Sheet: TransM9_EnrichGO
Table S14 Gene ontology (GO) enrichment analysis of transcript modules sharing high correlation coefficient (PCC > 0.7) with the identified metabolite modules in Mallotus japonicus.
Tags	GO ID	GO Name	GO Category	FDR	P-Value	Nr Test	Nr Reference	Non Annot Test	Non Annot Reference
[OVER]	GO:0005829	cytosol	CELLULAR_COMPONENT	4.45635e-17	2.39569e-19	62	9644	318	216226
[OVER]	GO:0005886	plasma membrane	CELLULAR_COMPONENT	7.24507e-17	4.07192e-19	65	10665	315	215205
[OVER]	GO:0009640	photomorphogenesis	BIOLOGICAL_PROCESS	7.34966e-12	7.66276e-14	18	919	362	224951
[OVER]	GO:0055114	oxidation-reduction process	BIOLOGICAL_PROCESS	2.34083e-10	2.63121e-12	49	9273	331	216597
[OVER]	GO:0009506	plasmodesma	CELLULAR_COMPONENT	2.46109e-10	2.80648e-12	29	3432	351	222438
[OVER]	GO:0004034	aldose 1-epimerase activity	MOLECULAR_FUNCTION	2.42731e-09	3.3611e-11	6	29	374	225841
[OVER]	GO:0010090	trichome morphogenesis	BIOLOGICAL_PROCESS	6.36614e-09	9.12633e-11	13	615	367	225255
[OVER]	GO:0003723	RNA binding	MOLECULAR_FUNCTION	1.27304e-08	1.92869e-10	32	4968	348	220902
[OVER]	GO:0019013	viral nucleocapsid	CELLULAR_COMPONENT	1.28635e-08	1.98029e-10	10	300	370	225570
[OVER]	GO:0010162	seed dormancy process	BIOLOGICAL_PROCESS	1.42643e-08	2.21918e-10	12	529	368	225341
[OVER]	GO:0005524	ATP binding	MOLECULAR_FUNCTION	2.15671e-08	3.58368e-10	49	10713	331	215157
[OVER]	GO:0016567	protein ubiquitination	BIOLOGICAL_PROCESS	2.7396e-08	4.57455e-10	18	1582	362	224288
[OVER]	GO:0009909	regulation of flower development	BIOLOGICAL_PROCESS	3.87817e-08	7.01274e-10	16	1235	364	224635
[OVER]	GO:0000278	mitotic cell cycle	BIOLOGICAL_PROCESS	6.25464e-08	1.16666e-09	18	1681	362	224189
[OVER]	GO:0016021	integral component of membrane	CELLULAR_COMPONENT	8.16028e-08	1.55535e-09	50	11578	330	214292
[OVER]	GO:0015706	nitrate transport	BIOLOGICAL_PROCESS	1.45481e-07	2.83212e-09	10	399	370	225471
[OVER]	GO:0032440	2-alkenal reductase [NAD(P)+] activity	MOLECULAR_FUNCTION	2.01459e-07	4.06955e-09	17	1608	363	224262
[OVER]	GO:0006606	protein import into nucleus	BIOLOGICAL_PROCESS	2.70412e-07	5.66066e-09	10	430	370	225440
[OVER]	GO:0006406	mRNA export from nucleus	BIOLOGICAL_PROCESS	3.57135e-07	7.65649e-09	9	325	371	225545
[OVER]	GO:0019915	lipid storage	BIOLOGICAL_PROCESS	5.90934e-07	1.35736e-08	9	348	371	225522
[OVER]	GO:0050826	response to freezing	BIOLOGICAL_PROCESS	7.888e-07	1.84398e-08	9	361	371	225509
[OVER]	GO:0050269	coniferyl-aldehyde dehydrogenase activity	MOLECULAR_FUNCTION	1.23434e-06	2.976e-08	4	15	376	225855
[OVER]	GO:0006012	galactose metabolic process	BIOLOGICAL_PROCESS	1.38307e-06	3.37967e-08	6	101	374	225769
[OVER]	GO:0031209	SCAR complex	CELLULAR_COMPONENT	1.81505e-06	4.5831e-08	4	17	376	225853
[OVER]	GO:0051788	response to misfolded protein	BIOLOGICAL_PROCESS	2.24925e-06	5.77106e-08	10	554	370	225316
[OVER]	GO:0006364	rRNA processing	BIOLOGICAL_PROCESS	2.63446e-06	6.84525e-08	15	1501	365	224369
[OVER]	GO:0045893	positive regulation of transcription, DNA-templated	BIOLOGICAL_PROCESS	3.75262e-06	1.02441e-07	16	1779	364	224091
[OVER]	GO:0009880	embryonic pattern specification	BIOLOGICAL_PROCESS	4.03848e-06	1.10855e-07	7	211	373	225659
[OVER]	GO:0001758	retinal dehydrogenase activity	MOLECULAR_FUNCTION	4.7582e-06	1.33324e-07	4	23	376	225847
[OVER]	GO:0005774	vacuolar membrane	CELLULAR_COMPONENT	5.24115e-06	1.48564e-07	18	2327	362	223543
[OVER]	GO:0005643	nuclear pore	CELLULAR_COMPONENT	5.28445e-06	1.50222e-07	7	221	373	225649
[OVER]	GO:0010072	primary shoot apical meristem specification	BIOLOGICAL_PROCESS	6.00305e-06	1.73954e-07	7	226	373	225644
[OVER]	GO:0000394	RNA splicing, via endonucleolytic cleavage and ligation	BIOLOGICAL_PROCESS	6.00305e-06	1.74072e-07	10	626	370	225244
[OVER]	GO:0045595	regulation of cell differentiation	BIOLOGICAL_PROCESS	6.29123e-06	1.83966e-07	8	342	372	225528
[OVER]	GO:0009504	cell plate	CELLULAR_COMPONENT	6.45503e-06	1.89797e-07	6	137	374	225733
[OVER]	GO:0010182	sugar mediated signaling pathway	BIOLOGICAL_PROCESS	8.77394e-06	2.59423e-07	9	497	371	225373
[OVER]	GO:0045010	actin nucleation	BIOLOGICAL_PROCESS	9.29163e-06	2.77001e-07	9	501	371	225369
[OVER]	GO:1990904	ribonucleoprotein complex	CELLULAR_COMPONENT	1.04525e-05	3.14163e-07	18	2452	362	223418
[OVER]	GO:0004427	inorganic diphosphatase activity	MOLECULAR_FUNCTION	1.69673e-05	5.37613e-07	5	86	375	225784
[OVER]	GO:0080129	proteasome core complex assembly	BIOLOGICAL_PROCESS	2.5266e-05	8.33489e-07	8	420	372	225450
[OVER]	GO:0000338	protein deneddylation	BIOLOGICAL_PROCESS	2.5266e-05	8.33489e-07	8	420	372	225450
[OVER]	GO:0048449	floral organ formation	BIOLOGICAL_PROCESS	2.62689e-05	8.72991e-07	9	577	371	225293
[OVER]	GO:0005739	mitochondrion	CELLULAR_COMPONENT	3.27214e-05	1.10075e-06	45	12214	335	213656
[OVER]	GO:0005730	nucleolus	CELLULAR_COMPONENT	3.84428e-05	1.30261e-06	14	1655	366	224215
[OVER]	GO:0051567	histone H3-K9 methylation	BIOLOGICAL_PROCESS	4.79157e-05	1.63921e-06	9	624	371	225246
[OVER]	GO:0010228	vegetative to reproductive phase transition of meristem	BIOLOGICAL_PROCESS	5.80042e-05	2.00796e-06	14	1719	366	224151
[OVER]	GO:0070628	proteasome binding	MOLECULAR_FUNCTION	7.41175e-05	2.58992e-06	3	13	377	225857
[OVER]	GO:0009845	seed germination	BIOLOGICAL_PROCESS	7.43208e-05	2.60307e-06	10	850	370	225020
[OVER]	GO:0006346	DNA methylation-dependent heterochromatin assembly	BIOLOGICAL_PROCESS	7.82503e-05	2.74708e-06	8	495	372	225375
[OVER]	GO:0009407	toxin catabolic process	BIOLOGICAL_PROCESS	8.39333e-05	2.95342e-06	8	500	372	225370
[OVER]	GO:0034976	response to endoplasmic reticulum stress	BIOLOGICAL_PROCESS	8.58394e-05	3.02929e-06	11	1073	369	224797
[OVER]	GO:0010167	response to nitrate	BIOLOGICAL_PROCESS	8.58394e-05	3.03448e-06	7	351	373	225519
[OVER]	GO:0007062	sister chromatid cohesion	BIOLOGICAL_PROCESS	0.000113718	4.0478e-06	9	699	371	225171
[OVER]	GO:0010564	regulation of cell cycle process	BIOLOGICAL_PROCESS	0.000129209	4.63077e-06	9	711	371	225159
[OVER]	GO:0006094	gluconeogenesis	BIOLOGICAL_PROCESS	0.000151244	5.51905e-06	9	727	371	225143
[OVER]	GO:0009086	methionine biosynthetic process	BIOLOGICAL_PROCESS	0.000190381	7.08677e-06	8	565	372	225305
[OVER]	GO:0009707	chloroplast outer membrane	CELLULAR_COMPONENT	0.000235705	8.88911e-06	5	156	375	225714
[OVER]	GO:0030001	metal ion transport	BIOLOGICAL_PROCESS	0.00024018	9.07743e-06	16	2531	364	223339
[OVER]	GO:0019899	enzyme binding	MOLECULAR_FUNCTION	0.000252449	9.5617e-06	11	1215	369	224655
[OVER]	GO:0009920	cell plate formation involved in plant-type cell wall biogenesis	BIOLOGICAL_PROCESS	0.00027603	1.05183e-05	3	22	377	225848
[OVER]	GO:0048765	root hair cell differentiation	BIOLOGICAL_PROCESS	0.000280643	1.07667e-05	10	1003	370	224867
[OVER]	GO:0043543	protein acylation	BIOLOGICAL_PROCESS	0.000295798	1.14445e-05	9	798	371	225072
[OVER]	GO:0004672	protein kinase activity	MOLECULAR_FUNCTION	0.000308375	1.19813e-05	25	5558	355	220312
[OVER]	GO:0019684	photosynthesis, light reaction	BIOLOGICAL_PROCESS	0.000328577	1.2793e-05	12	1500	368	224370
[OVER]	GO:0009220	pyrimidine ribonucleotide biosynthetic process	BIOLOGICAL_PROCESS	0.000340652	1.33741e-05	8	618	372	225252
[OVER]	GO:0031048	heterochromatin assembly by small RNA	BIOLOGICAL_PROCESS	0.00034835	1.37331e-05	7	445	373	225425
[OVER]	GO:0043161	proteasome-mediated ubiquitin-dependent protein catabolic process	BIOLOGICAL_PROCESS	0.000374418	1.49743e-05	8	628	372	225242
[OVER]	GO:0010265	SCF complex assembly	BIOLOGICAL_PROCESS	0.000413221	1.66271e-05	3	26	377	225844
[OVER]	GO:0080160	selenate transport	BIOLOGICAL_PROCESS	0.000417751	1.68434e-05	2	2	378	225868
[OVER]	GO:0006259	DNA metabolic process	BIOLOGICAL_PROCESS	0.000437088	1.76587e-05	25	5691	355	220179
[OVER]	GO:0003677	DNA binding	MOLECULAR_FUNCTION	0.000457396	1.85909e-05	29	7062	351	218808
[OVER]	GO:0030246	carbohydrate binding	MOLECULAR_FUNCTION	0.000494464	2.02184e-05	10	1081	370	224789
[OVER]	GO:0051131	chaperone-mediated protein complex assembly	BIOLOGICAL_PROCESS	0.000497987	2.0403e-05	3	28	377	225842
[OVER]	GO:0048825	cotyledon development	BIOLOGICAL_PROCESS	0.000558206	2.30066e-05	6	323	374	225547
[OVER]	GO:0005983	starch catabolic process	BIOLOGICAL_PROCESS	0.000626939	2.59927e-05	4	95	376	225775
[OVER]	GO:0009733	response to auxin	BIOLOGICAL_PROCESS	0.000701187	2.92423e-05	10	1130	370	224740
[OVER]	GO:0009560	embryo sac egg cell differentiation	BIOLOGICAL_PROCESS	0.000742396	3.10818e-05	7	507	373	225363
[OVER]	GO:0005506	iron ion binding	MOLECULAR_FUNCTION	0.000794542	3.34592e-05	11	1396	369	224474
[OVER]	GO:0031593	polyubiquitin modification-dependent protein binding	MOLECULAR_FUNCTION	0.000828056	3.50054e-05	3	34	377	225836
[OVER]	GO:0009644	response to high light intensity	BIOLOGICAL_PROCESS	0.00090493	3.84763e-05	8	719	372	225151
[OVER]	GO:0080008	Cul4-RING E3 ubiquitin ligase complex	CELLULAR_COMPONENT	0.000906058	3.85999e-05	7	525	373	225345
[OVER]	GO:0080183	response to photooxidative stress	BIOLOGICAL_PROCESS	0.000982508	4.20149e-05	2	4	378	225866
[OVER]	GO:0016572	histone phosphorylation	BIOLOGICAL_PROCESS	0.00123682	5.31922e-05	5	229	375	225641
[OVER]	GO:0002758	innate immune response-activating signal transduction	BIOLOGICAL_PROCESS	0.0013602	5.88309e-05	4	118	376	225752
[OVER]	GO:0009570	chloroplast stroma	CELLULAR_COMPONENT	0.00137966	5.98975e-05	16	2969	364	222901
[OVER]	GO:0019898	extrinsic component of membrane	CELLULAR_COMPONENT	0.0015599	6.83576e-05	7	576	373	225294
[OVER]	GO:0010051	xylem and phloem pattern formation	BIOLOGICAL_PROCESS	0.00178492	7.86545e-05	6	405	374	225465
[OVER]	GO:0007020	microtubule nucleation	BIOLOGICAL_PROCESS	0.00180558	7.97119e-05	5	250	375	225620
[OVER]	GO:0042592	homeostatic process	BIOLOGICAL_PROCESS	0.00185848	8.2199e-05	14	2418	366	223452
[OVER]	GO:0048581	negative regulation of post-embryonic development	BIOLOGICAL_PROCESS	0.00186606	8.26862e-05	5	252	375	225618
[OVER]	GO:0050790	regulation of catalytic activity	BIOLOGICAL_PROCESS	0.00191247	8.50539e-05	14	2426	366	223444
[OVER]	GO:0005680	anaphase-promoting complex	CELLULAR_COMPONENT	0.00194645	8.68825e-05	3	47	377	225823
[OVER]	GO:0008270	zinc ion binding	MOLECULAR_FUNCTION	0.00199923	8.95638e-05	25	6166	355	219704
[OVER]	GO:0004733	pyridoxamine-phosphate oxidase activity	MOLECULAR_FUNCTION	0.00205429	9.21977e-05	3	48	377	225822
[OVER]	GO:0007638	mechanosensory behavior	BIOLOGICAL_PROCESS	0.00221351	0.000100499	2	7	378	225863
[OVER]	GO:0015103	inorganic anion transmembrane transporter activity	MOLECULAR_FUNCTION	0.00221351	0.000100606	6	424	374	225446
[OVER]	GO:0044550	secondary metabolite biosynthetic process	BIOLOGICAL_PROCESS	0.00234614	0.000107016	9	1071	371	224799
[OVER]	GO:0016246	RNA interference	BIOLOGICAL_PROCESS	0.00234614	0.00010693	8	835	372	225035
[OVER]	GO:0020037	heme binding	MOLECULAR_FUNCTION	0.00250026	0.000114454	10	1336	370	224534
[OVER]	GO:0006635	fatty acid beta-oxidation	BIOLOGICAL_PROCESS	0.00262918	0.000120569	8	850	372	225020
[OVER]	GO:0047787	delta4-3-oxosteroid 5beta-reductase activity	MOLECULAR_FUNCTION	0.00271228	0.000125484	2	8	378	225862
[OVER]	GO:0008794	arsenate reductase (glutaredoxin) activity	MOLECULAR_FUNCTION	0.00271228	0.000125484	2	8	378	225862
[OVER]	GO:0042176	regulation of protein catabolic process	BIOLOGICAL_PROCESS	0.00274521	0.000127455	4	145	376	225725
[OVER]	GO:0051707	response to other organism	BIOLOGICAL_PROCESS	0.00299718	0.000139886	22	5342	358	220528
[OVER]	GO:0001510	RNA methylation	BIOLOGICAL_PROCESS	0.00305635	0.000143146	8	872	372	224998
[OVER]	GO:0048588	developmental cell growth	BIOLOGICAL_PROCESS	0.00317533	0.000149753	9	1121	371	224749
[OVER]	GO:1902356	oxaloacetate(2-) transmembrane transport	BIOLOGICAL_PROCESS	0.00323166	0.000153199	2	9	378	225861
[OVER]	GO:0015367	oxoglutarate:malate antiporter activity	MOLECULAR_FUNCTION	0.00323166	0.000153199	2	9	378	225861
[OVER]	GO:0031399	regulation of protein modification process	BIOLOGICAL_PROCESS	0.0032651	0.00015505	11	1665	369	224205
[OVER]	GO:0000502	proteasome complex	CELLULAR_COMPONENT	0.00353601	0.000169931	5	295	375	225575
[OVER]	GO:0042393	histone binding	MOLECULAR_FUNCTION	0.00364881	0.000175649	4	158	376	225712
[OVER]	GO:0050521	alpha-glucan, water dikinase activity	MOLECULAR_FUNCTION	0.00380182	0.000183635	2	10	378	225860
[OVER]	GO:0015131	oxaloacetate transmembrane transporter activity	MOLECULAR_FUNCTION	0.00380182	0.000183635	2	10	378	225860
[OVER]	GO:0042793	plastid transcription	BIOLOGICAL_PROCESS	0.00383571	0.000186209	5	301	375	225569
[OVER]	GO:0009524	phragmoplast	CELLULAR_COMPONENT	0.00383571	0.000186209	5	301	375	225569
[OVER]	GO:0009853	photorespiration	BIOLOGICAL_PROCESS	0.0038456	0.000187002	7	680	373	225190
[OVER]	GO:0007155	cell adhesion	BIOLOGICAL_PROCESS	0.00401428	0.000196839	6	481	374	225389
[OVER]	GO:0071470	cellular response to osmotic stress	BIOLOGICAL_PROCESS	0.00410227	0.000201822	4	164	376	225706
[OVER]	GO:0043687	post-translational protein modification	BIOLOGICAL_PROCESS	0.00467714	0.000233914	6	497	374	225373
[OVER]	GO:0018024	histone-lysine N-methyltransferase activity	MOLECULAR_FUNCTION	0.00480987	0.000240944	4	172	376	225698
[OVER]	GO:0042744	hydrogen peroxide catabolic process	BIOLOGICAL_PROCESS	0.00496566	0.000249153	6	503	374	225367
[OVER]	GO:0009678	pyrophosphate hydrolysis-driven proton transmembrane transporter activity	MOLECULAR_FUNCTION	0.00499344	0.000251766	6	504	374	225366
[OVER]	GO:0006753	nucleoside phosphate metabolic process	BIOLOGICAL_PROCESS	0.00520061	0.000263483	17	3740	363	222130
[OVER]	GO:0032879	regulation of localization	BIOLOGICAL_PROCESS	0.00535983	0.000271986	9	1217	371	224653
[OVER]	GO:0008271	secondary active sulfate transmembrane transporter activity	MOLECULAR_FUNCTION	0.00548715	0.000278894	3	71	377	225799
[OVER]	GO:0071423	malate transmembrane transport	BIOLOGICAL_PROCESS	0.00570131	0.000291172	2	13	378	225857
[OVER]	GO:0033044	regulation of chromosome organization	BIOLOGICAL_PROCESS	0.00575369	0.000294785	7	734	373	225136
[OVER]	GO:0051225	spindle assembly	BIOLOGICAL_PROCESS	0.00625675	0.000322087	4	186	376	225684
[OVER]	GO:0097602	cullin family protein binding	MOLECULAR_FUNCTION	0.00643668	0.000332398	2	14	378	225856
[OVER]	GO:0009941	chloroplast envelope	CELLULAR_COMPONENT	0.00655934	0.000339267	14	2783	366	223087
[OVER]	GO:0009826	unidimensional cell growth	BIOLOGICAL_PROCESS	0.00658227	0.000340989	9	1256	371	224614
[OVER]	GO:0005794	Golgi apparatus	CELLULAR_COMPONENT	0.00658347	0.000341587	18	4190	362	221680
[OVER]	GO:0006412	translation	BIOLOGICAL_PROCESS	0.00663094	0.00034459	20	4939	360	220931
[OVER]	GO:0010074	maintenance of meristem identity	BIOLOGICAL_PROCESS	0.00669508	0.000348469	4	190	376	225680
[OVER]	GO:0042026	protein refolding	BIOLOGICAL_PROCESS	0.00695877	0.000363894	3	78	377	225792
[OVER]	GO:0016887	ATPase activity	MOLECULAR_FUNCTION	0.00740998	0.000389904	12	2169	368	223701
[OVER]	GO:0009505	plant-type cell wall	CELLULAR_COMPONENT	0.00756572	0.000399947	7	773	373	225097
[OVER]	GO:0043603	cellular amide metabolic process	BIOLOGICAL_PROCESS	0.00829201	0.000439017	22	5757	358	220113
[OVER]	GO:0006470	protein dephosphorylation	BIOLOGICAL_PROCESS	0.00830361	0.000440307	8	1034	372	224836
[OVER]	GO:0010048	vernalization response	BIOLOGICAL_PROCESS	0.00863598	0.000460042	5	368	375	225502
[OVER]	GO:0098661	inorganic anion transmembrane transport	BIOLOGICAL_PROCESS	0.0093898	0.000504022	4	210	376	225660
[OVER]	GO:0006974	cellular response to DNA damage stimulus	BIOLOGICAL_PROCESS	0.00988595	0.000532265	12	2248	368	223622
[OVER]	GO:0016579	protein deubiquitination	BIOLOGICAL_PROCESS	0.00995695	0.000536898	5	381	375	225489
[OVER]	GO:0051321	meiotic cell cycle	BIOLOGICAL_PROCESS	0.00999688	0.000539865	10	1630	370	224240

## Sheet: TransM10_EnrichGO
Table S14 Gene ontology (GO) enrichment analysis of transcript modules sharing high correlation coefficient (PCC > 0.7) with the identified metabolite modules in Mallotus japonicus.
Tags	GO ID	GO Name	GO Category	FDR	P-Value	Nr Test	Nr Reference	Non Annot Test	Non Annot Reference
[OVER]	GO:0006355	regulation of transcription, DNA-templated	BIOLOGICAL_PROCESS	2.82873e-27	1.6359e-29	104	7482	743	217921
[OVER]	GO:0009414	response to water deprivation	BIOLOGICAL_PROCESS	1.15346e-16	1.24017e-18	35	1313	812	224090
[OVER]	GO:0003700	DNA-binding transcription factor activity	MOLECULAR_FUNCTION	1.78896e-16	1.9526e-18	48	2642	799	222761
[OVER]	GO:0055114	oxidation-reduction process	BIOLOGICAL_PROCESS	2.99436e-16	3.31703e-18	95	9227	752	216176
[OVER]	GO:0005829	cytosol	CELLULAR_COMPONENT	1.58016e-14	1.89202e-16	94	9612	753	215791
[OVER]	GO:1901684	arsenate ion transmembrane transport	BIOLOGICAL_PROCESS	1.46743e-11	2.25015e-13	6	3	841	225400
[OVER]	GO:0008137	NADH dehydrogenase (ubiquinone) activity	MOLECULAR_FUNCTION	1.84569e-11	2.91655e-13	13	166	834	225237
[OVER]	GO:0048038	quinone binding	MOLECULAR_FUNCTION	3.22108e-11	5.2211e-13	11	98	836	225305
[OVER]	GO:0009506	plasmodesma	CELLULAR_COMPONENT	8.60292e-11	1.47855e-12	45	3416	802	221987
[OVER]	GO:1902553	positive regulation of catalase activity	BIOLOGICAL_PROCESS	8.09548e-10	1.51662e-11	5	2	842	225401
[OVER]	GO:0005524	ATP binding	MOLECULAR_FUNCTION	1.03288e-08	2.12852e-10	85	10677	762	214726
[OVER]	GO:0009611	response to wounding	BIOLOGICAL_PROCESS	2.54208e-08	5.5078e-10	21	991	826	224412
[OVER]	GO:0010081	regulation of inflorescence meristem growth	BIOLOGICAL_PROCESS	4.38841e-08	9.72263e-10	4	1	843	225402
[OVER]	GO:0005507	copper ion binding	MOLECULAR_FUNCTION	7.18368e-08	1.61497e-09	19	852	828	224551
[OVER]	GO:0048046	apoplast	CELLULAR_COMPONENT	8.06024e-08	1.82516e-09	23	1280	824	224123
[OVER]	GO:0046686	response to cadmium ion	BIOLOGICAL_PROCESS	1.34314e-07	3.11798e-09	25	1552	822	223851
[OVER]	GO:1901683	arsenate ion transmembrane transporter activity	MOLECULAR_FUNCTION	1.68847e-07	4.00216e-09	6	29	841	225374
[OVER]	GO:0015114	phosphate ion transmembrane transporter activity	MOLECULAR_FUNCTION	1.73852e-07	4.13494e-09	7	55	840	225348
[OVER]	GO:1902600	proton transmembrane transport	BIOLOGICAL_PROCESS	1.96577e-07	4.7395e-09	25	1586	822	223817
[OVER]	GO:0004129	cytochrome-c oxidase activity	MOLECULAR_FUNCTION	2.0605e-07	5.01825e-09	9	135	838	225268
[OVER]	GO:0004674	protein serine/threonine kinase activity	MOLECULAR_FUNCTION	2.93065e-07	7.37617e-09	41	3869	806	221534
[OVER]	GO:0048767	root hair elongation	BIOLOGICAL_PROCESS	5.53718e-07	1.44327e-08	15	586	832	224817
[OVER]	GO:0008270	zinc ion binding	MOLECULAR_FUNCTION	7.04231e-07	1.85852e-08	54	6137	793	219266
[OVER]	GO:0016762	xyloglucan:xyloglucosyl transferase activity	MOLECULAR_FUNCTION	7.86965e-07	2.10892e-08	7	71	840	225332
[OVER]	GO:0009610	response to symbiotic fungus	BIOLOGICAL_PROCESS	8.70196e-07	2.36031e-08	9	163	838	225240
[OVER]	GO:0010080	regulation of floral meristem growth	BIOLOGICAL_PROCESS	8.81987e-07	2.42103e-08	4	5	843	225398
[OVER]	GO:0033214	siderophore-dependent iron import into cell	BIOLOGICAL_PROCESS	1.41116e-06	4.02303e-08	4	6	843	225397
[OVER]	GO:0031965	nuclear membrane	CELLULAR_COMPONENT	1.68026e-06	4.84493e-08	8	125	839	225278
[OVER]	GO:0009867	jasmonic acid mediated signaling pathway	BIOLOGICAL_PROCESS	1.69941e-06	4.91399e-08	16	743	831	224660
[OVER]	GO:2001241	positive regulation of extrinsic apoptotic signaling pathway in absence of ligand	BIOLOGICAL_PROCESS	1.79292e-06	5.22818e-08	3	0	844	225403
[OVER]	GO:0003834	beta-carotene 15,15'-monooxygenase activity	MOLECULAR_FUNCTION	1.79292e-06	5.22818e-08	3	0	844	225403
[OVER]	GO:0051980	iron-nicotianamine transmembrane transporter activity	MOLECULAR_FUNCTION	2.11428e-06	6.30307e-08	4	7	843	225396
[OVER]	GO:0009733	response to auxin	BIOLOGICAL_PROCESS	3.65033e-06	1.10904e-07	19	1121	828	224282
[OVER]	GO:0043565	sequence-specific DNA binding	MOLECULAR_FUNCTION	3.91521e-06	1.20228e-07	21	1367	826	224036
[OVER]	GO:0006468	protein phosphorylation	BIOLOGICAL_PROCESS	4.07111e-06	1.25347e-07	49	5642	798	219761
[OVER]	GO:0050589	leucocyanidin oxygenase activity	MOLECULAR_FUNCTION	4.32525e-06	1.34581e-07	5	27	842	225376
[OVER]	GO:0005747	mitochondrial respiratory chain complex I	CELLULAR_COMPONENT	4.82505e-06	1.50525e-07	8	146	839	225257
[OVER]	GO:0006857	oligopeptide transport	BIOLOGICAL_PROCESS	5.08361e-06	1.60247e-07	11	348	836	225055
[OVER]	GO:0005981	regulation of glycogen catabolic process	BIOLOGICAL_PROCESS	6.41672e-06	2.08542e-07	3	1	844	225402
[OVER]	GO:0042587	glycogen granule	CELLULAR_COMPONENT	6.41672e-06	2.08542e-07	3	1	844	225402
[OVER]	GO:0009409	response to cold	BIOLOGICAL_PROCESS	6.86338e-06	2.24736e-07	25	1950	822	223453
[OVER]	GO:0005315	inorganic phosphate transmembrane transporter activity	MOLECULAR_FUNCTION	7.38359e-06	2.42972e-07	6	62	841	225341
[OVER]	GO:0052544	defense response by callose deposition in cell wall	BIOLOGICAL_PROCESS	7.98209e-06	2.65268e-07	6	63	841	225340
[OVER]	GO:0030246	carbohydrate binding	MOLECULAR_FUNCTION	8.25299e-06	2.74943e-07	18	1073	829	224330
[OVER]	GO:0005852	eukaryotic translation initiation factor 3 complex	CELLULAR_COMPONENT	1.25691e-05	4.37158e-07	6	69	841	225334
[OVER]	GO:0005979	regulation of glycogen biosynthetic process	BIOLOGICAL_PROCESS	1.44407e-05	5.19897e-07	3	2	844	225401
[OVER]	GO:0030324	lung development	BIOLOGICAL_PROCESS	1.44407e-05	5.19897e-07	3	2	844	225401
[OVER]	GO:0048754	branching morphogenesis of an epithelial tube	BIOLOGICAL_PROCESS	1.44407e-05	5.19897e-07	3	2	844	225401
[OVER]	GO:0072357	PTW/PP1 phosphatase complex	CELLULAR_COMPONENT	1.44407e-05	5.19897e-07	3	2	844	225401
[OVER]	GO:0005506	iron ion binding	MOLECULAR_FUNCTION	1.70733e-05	6.24411e-07	20	1387	827	224016
[OVER]	GO:0010363	regulation of plant-type hypersensitive response	BIOLOGICAL_PROCESS	1.78621e-05	6.54714e-07	17	1022	830	224381
[OVER]	GO:0042538	hyperosmotic salinity response	BIOLOGICAL_PROCESS	1.84842e-05	6.83539e-07	11	405	836	224998
[OVER]	GO:0016207	4-coumarate-CoA ligase activity	MOLECULAR_FUNCTION	3.17162e-05	1.20902e-06	5	44	842	225359
[OVER]	GO:0010200	response to chitin	BIOLOGICAL_PROCESS	3.56771e-05	1.36873e-06	16	961	831	224442
[OVER]	GO:0010582	floral meristem determinacy	BIOLOGICAL_PROCESS	3.83015e-05	1.48019e-06	5	46	842	225357
[OVER]	GO:0032440	2-alkenal reductase [NAD(P)+] activity	MOLECULAR_FUNCTION	3.83015e-05	1.48162e-06	21	1604	826	223799
[OVER]	GO:0043090	amino acid import	BIOLOGICAL_PROCESS	4.59646e-05	1.7971e-06	10	360	837	225043
[OVER]	GO:0016874	ligase activity	MOLECULAR_FUNCTION	4.73042e-05	1.85333e-06	29	2806	818	222597
[OVER]	GO:0004565	beta-galactosidase activity	MOLECULAR_FUNCTION	5.36637e-05	2.12434e-06	6	92	841	225311
[OVER]	GO:0010286	heat acclimation	BIOLOGICAL_PROCESS	5.58467e-05	2.22441e-06	8	212	839	225191
[OVER]	GO:0010029	regulation of seed germination	BIOLOGICAL_PROCESS	6.15264e-05	2.46066e-06	9	290	838	225113
[OVER]	GO:0006612	protein targeting to membrane	BIOLOGICAL_PROCESS	6.83048e-05	2.754e-06	17	1140	830	224263
[OVER]	GO:0080167	response to karrikin	BIOLOGICAL_PROCESS	7.40112e-05	2.99614e-06	10	382	837	225021
[OVER]	GO:0016045	detection of bacterium	BIOLOGICAL_PROCESS	7.80067e-05	3.19601e-06	4	23	843	225380
[OVER]	GO:0010222	stem vascular tissue pattern formation	BIOLOGICAL_PROCESS	7.80067e-05	3.19601e-06	4	23	843	225380
[OVER]	GO:0047180	salutaridinol 7-O-acetyltransferase activity	MOLECULAR_FUNCTION	7.80067e-05	3.19601e-06	4	23	843	225380
[OVER]	GO:0043153	entrainment of circadian clock by photoperiod	BIOLOGICAL_PROCESS	0.000102748	4.31849e-06	3	6	844	225397
[OVER]	GO:0006817	phosphate ion transport	BIOLOGICAL_PROCESS	0.000115015	4.86214e-06	6	107	841	225296
[OVER]	GO:0009932	cell tip growth	BIOLOGICAL_PROCESS	0.000123658	5.25777e-06	14	829	833	224574
[OVER]	GO:0009873	ethylene-activated signaling pathway	BIOLOGICAL_PROCESS	0.00013364	5.71483e-06	10	412	837	224991
[OVER]	GO:0045488	pectin metabolic process	BIOLOGICAL_PROCESS	0.000141325	6.07799e-06	10	415	837	224988
[OVER]	GO:0010215	cellulose microfibril organization	BIOLOGICAL_PROCESS	0.000149453	6.4519e-06	4	28	843	225375
[OVER]	GO:0051287	NAD binding	MOLECULAR_FUNCTION	0.000153436	6.64884e-06	11	517	836	224886
[OVER]	GO:0005730	nucleolus	CELLULAR_COMPONENT	0.000179447	7.84909e-06	20	1649	827	223754
[OVER]	GO:0009505	plant-type cell wall	CELLULAR_COMPONENT	0.000242901	1.08818e-05	13	767	834	224636
[OVER]	GO:0009915	phloem sucrose loading	BIOLOGICAL_PROCESS	0.000248999	1.12158e-05	3	9	844	225394
[OVER]	GO:0008506	sucrose:proton symporter activity	MOLECULAR_FUNCTION	0.000248999	1.12158e-05	3	9	844	225394
[OVER]	GO:0009743	response to carbohydrate	BIOLOGICAL_PROCESS	0.000249675	1.12666e-05	19	1549	828	223854
[OVER]	GO:0033290	eukaryotic 48S preinitiation complex	CELLULAR_COMPONENT	0.000253223	1.14886e-05	5	72	842	225331
[OVER]	GO:0005985	sucrose metabolic process	BIOLOGICAL_PROCESS	0.000259629	1.18638e-05	6	126	841	225277
[OVER]	GO:0050115	myosin-light-chain-phosphatase activity	MOLECULAR_FUNCTION	0.000303637	1.39984e-05	2	0	845	225403
[OVER]	GO:0017018	myosin phosphatase activity	MOLECULAR_FUNCTION	0.000303637	1.39984e-05	2	0	845	225403
[OVER]	GO:0019140	inositol 3-kinase activity	MOLECULAR_FUNCTION	0.000303637	1.39984e-05	2	0	845	225403
[OVER]	GO:0005794	Golgi apparatus	CELLULAR_COMPONENT	0.000369568	1.72186e-05	35	4173	812	221230
[OVER]	GO:0043069	negative regulation of programmed cell death	BIOLOGICAL_PROCESS	0.000378869	1.76828e-05	11	576	836	224827
[OVER]	GO:0016282	eukaryotic 43S preinitiation complex	CELLULAR_COMPONENT	0.000440966	2.08325e-05	5	82	842	225321
[OVER]	GO:0019401	alditol biosynthetic process	BIOLOGICAL_PROCESS	0.000484394	2.30025e-05	3	12	844	225391
[OVER]	GO:0001731	formation of translation preinitiation complex	BIOLOGICAL_PROCESS	0.000488941	2.32583e-05	5	84	842	225319
[OVER]	GO:0019646	aerobic electron transport chain	BIOLOGICAL_PROCESS	0.000538828	2.57191e-05	4	41	843	225362
[OVER]	GO:0016791	phosphatase activity	MOLECULAR_FUNCTION	0.000618993	2.9848e-05	21	1967	826	223436
[OVER]	GO:0046482	para-aminobenzoic acid metabolic process	BIOLOGICAL_PROCESS	0.000630469	3.05041e-05	6	150	841	225253
[OVER]	GO:0009624	response to nematode	BIOLOGICAL_PROCESS	0.000781977	3.8153e-05	8	318	839	225085
[OVER]	GO:0031410	cytoplasmic vesicle	CELLULAR_COMPONENT	0.00078769	3.856e-05	36	4520	811	220883
[OVER]	GO:0051301	cell division	BIOLOGICAL_PROCESS	0.000812987	3.98647e-05	21	2008	826	223395
[OVER]	GO:0016679	oxidoreductase activity, acting on diphenols and related substances as donors	MOLECULAR_FUNCTION	0.000840624	4.15622e-05	8	322	839	225081
[OVER]	GO:0009698	phenylpropanoid metabolic process	BIOLOGICAL_PROCESS	0.00084371	4.19896e-05	11	635	836	224768
[OVER]	GO:0005887	integral component of plasma membrane	CELLULAR_COMPONENT	0.000930245	4.68267e-05	9	425	838	224978
[OVER]	GO:0071214	cellular response to abiotic stimulus	BIOLOGICAL_PROCESS	0.000933877	4.72378e-05	13	887	834	224516
[OVER]	GO:0006066	alcohol metabolic process	BIOLOGICAL_PROCESS	0.000933877	4.72092e-05	16	1289	831	224114
[OVER]	GO:0005509	calcium ion binding	MOLECULAR_FUNCTION	0.000961093	4.89275e-05	14	1020	833	224383
[OVER]	GO:0010588	cotyledon vascular tissue pattern formation	BIOLOGICAL_PROCESS	0.000968043	4.93602e-05	4	49	843	225354
[OVER]	GO:0048831	regulation of shoot system development	BIOLOGICAL_PROCESS	0.000989296	5.06856e-05	16	1297	831	224106
[OVER]	GO:0003723	RNA binding	MOLECULAR_FUNCTION	0.00104651	5.37873e-05	38	4962	809	220441
[OVER]	GO:0042775	mitochondrial ATP synthesis coupled electron transport	BIOLOGICAL_PROCESS	0.00118575	6.16197e-05	6	171	841	225232
[OVER]	GO:0015297	antiporter activity	MOLECULAR_FUNCTION	0.00120704	6.28249e-05	11	665	836	224738
[OVER]	GO:0019901	protein kinase binding	MOLECULAR_FUNCTION	0.0012733	6.64807e-05	8	345	839	225058
[OVER]	GO:0020037	heme binding	MOLECULAR_FUNCTION	0.00129129	6.75252e-05	16	1330	831	224073
[OVER]	GO:0009523	photosystem II	CELLULAR_COMPONENT	0.00140435	7.4124e-05	9	452	838	224951
[OVER]	GO:0010608	posttranscriptional regulation of gene expression	BIOLOGICAL_PROCESS	0.0014609	7.73464e-05	18	1641	829	223762
[OVER]	GO:0009863	salicylic acid mediated signaling pathway	BIOLOGICAL_PROCESS	0.00150867	8.01217e-05	13	936	834	224467
[OVER]	GO:0034976	response to endoplasmic reticulum stress	BIOLOGICAL_PROCESS	0.00151029	8.03309e-05	14	1070	833	224333
[OVER]	GO:0032879	regulation of localization	BIOLOGICAL_PROCESS	0.00154334	8.234e-05	15	1211	832	224192
[OVER]	GO:0016121	carotene catabolic process	BIOLOGICAL_PROCESS	0.00154988	8.35728e-05	2	2	845	225401
[OVER]	GO:0016124	xanthophyll catabolic process	BIOLOGICAL_PROCESS	0.00154988	8.35728e-05	2	2	845	225401
[OVER]	GO:0003975	UDP-N-acetylglucosamine-dolichyl-phosphate N-acetylglucosaminephosphotransferase activity	MOLECULAR_FUNCTION	0.00154988	8.35728e-05	2	2	845	225401
[OVER]	GO:0018580	nitronate monooxygenase activity	MOLECULAR_FUNCTION	0.00162127	8.7554e-05	3	20	844	225383
[OVER]	GO:0000041	transition metal ion transport	BIOLOGICAL_PROCESS	0.00174692	9.46244e-05	12	822	835	224581
[OVER]	GO:0000398	mRNA splicing, via spliceosome	BIOLOGICAL_PROCESS	0.00174979	9.49222e-05	10	579	837	224824
[OVER]	GO:0009570	chloroplast stroma	CELLULAR_COMPONENT	0.00186238	0.000101637	26	2959	821	222444
[OVER]	GO:0071732	cellular response to nitric oxide	BIOLOGICAL_PROCESS	0.00200317	0.000110136	4	61	843	225342
[OVER]	GO:0004805	trehalose-phosphatase activity	MOLECULAR_FUNCTION	0.00200317	0.000110136	4	61	843	225342
[OVER]	GO:0046283	anthocyanin-containing compound metabolic process	BIOLOGICAL_PROCESS	0.00200323	0.000110303	7	276	840	225127
[OVER]	GO:0071281	cellular response to iron ion	BIOLOGICAL_PROCESS	0.00236024	0.000131306	4	64	843	225339
[OVER]	GO:0030418	nicotianamine biosynthetic process	BIOLOGICAL_PROCESS	0.00247215	0.000138941	2	3	845	225400
[OVER]	GO:0080131	hydroxyjasmonate sulfotransferase activity	MOLECULAR_FUNCTION	0.00247215	0.000138941	2	3	845	225400
[OVER]	GO:0004795	threonine synthase activity	MOLECULAR_FUNCTION	0.00247215	0.000138941	2	3	845	225400
[OVER]	GO:0030410	nicotianamine synthase activity	MOLECULAR_FUNCTION	0.00247215	0.000138941	2	3	845	225400
[OVER]	GO:0047215	indole-3-acetate beta-glucosyltransferase activity	MOLECULAR_FUNCTION	0.00254068	0.000143	3	24	844	225379
[OVER]	GO:0005654	nucleoplasm	CELLULAR_COMPONENT	0.00261222	0.000147239	12	863	835	224540
[OVER]	GO:0051606	detection of stimulus	BIOLOGICAL_PROCESS	0.00270573	0.000153171	10	615	837	224788
[OVER]	GO:0032041	NAD-dependent histone deacetylase activity (H3-K14 specific)	MOLECULAR_FUNCTION	0.00278128	0.000159714	3	25	844	225378
[OVER]	GO:0097372	NAD-dependent histone deacetylase activity (H3-K18 specific)	MOLECULAR_FUNCTION	0.00278128	0.000159714	3	25	844	225378
[OVER]	GO:0046969	NAD-dependent histone deacetylase activity (H3-K9 specific)	MOLECULAR_FUNCTION	0.00278128	0.000159714	3	25	844	225378
[OVER]	GO:0046970	NAD-dependent histone deacetylase activity (H4-K16 specific)	MOLECULAR_FUNCTION	0.00278128	0.000159714	3	25	844	225378
[OVER]	GO:0016778	diphosphotransferase activity	MOLECULAR_FUNCTION	0.00285053	0.000163922	4	68	843	225335
[OVER]	GO:0009627	systemic acquired resistance	BIOLOGICAL_PROCESS	0.00296488	0.000171442	14	1153	833	224250
[OVER]	GO:0000303	response to superoxide	BIOLOGICAL_PROCESS	0.0029971	0.000174548	7	298	840	225105
[OVER]	GO:0016168	chlorophyll binding	MOLECULAR_FUNCTION	0.0030443	0.000178063	7	299	840	225104
[OVER]	GO:0010043	response to zinc ion	BIOLOGICAL_PROCESS	0.00317773	0.000186799	5	133	842	225270
[OVER]	GO:0016114	terpenoid biosynthetic process	BIOLOGICAL_PROCESS	0.00325626	0.000191763	14	1166	833	224237
[OVER]	GO:0051603	proteolysis involved in cellular protein catabolic process	BIOLOGICAL_PROCESS	0.00332857	0.00019631	19	1932	828	223471
[OVER]	GO:0016311	dephosphorylation	BIOLOGICAL_PROCESS	0.00332857	0.000196658	21	2259	826	223144
[OVER]	GO:0000164	protein phosphatase type 1 complex	CELLULAR_COMPONENT	0.00332857	0.000196835	3	27	844	225376
[OVER]	GO:0042435	indole-containing compound biosynthetic process	BIOLOGICAL_PROCESS	0.00338378	0.000200375	7	305	840	225098
[OVER]	GO:0010017	red or far-red light signaling pathway	BIOLOGICAL_PROCESS	0.00340215	0.000201798	6	214	841	225189
[OVER]	GO:0043457	regulation of cellular respiration	BIOLOGICAL_PROCESS	0.00340215	0.000202017	4	72	843	225331
[OVER]	GO:0009735	response to cytokinin	BIOLOGICAL_PROCESS	0.00381107	0.000228782	11	774	836	224629
[OVER]	GO:0005992	trehalose biosynthetic process	BIOLOGICAL_PROCESS	0.00390092	0.000234494	4	75	843	225328
[OVER]	GO:0008893	guanosine-3',5'-bis(diphosphate) 3'-diphosphatase activity	MOLECULAR_FUNCTION	0.00396197	0.000239131	3	29	844	225374
[OVER]	GO:0009926	auxin polar transport	BIOLOGICAL_PROCESS	0.00406708	0.000246801	8	420	839	224983
[OVER]	GO:0018298	protein-chromophore linkage	BIOLOGICAL_PROCESS	0.00414331	0.000251764	7	317	840	225086
[OVER]	GO:0009813	flavonoid biosynthetic process	BIOLOGICAL_PROCESS	0.00440293	0.000268974	10	661	837	224742
[OVER]	GO:0006996	organelle organization	BIOLOGICAL_PROCESS	0.00445106	0.000272277	63	10355	784	215048
[OVER]	GO:0080036	regulation of cytokinin-activated signaling pathway	BIOLOGICAL_PROCESS	0.00465289	0.000286897	3	31	844	225372
[OVER]	GO:0051724	NAD transmembrane transporter activity	MOLECULAR_FUNCTION	0.0047023	0.000290327	2	5	845	225398
[OVER]	GO:0008447	L-ascorbate oxidase activity	MOLECULAR_FUNCTION	0.00479945	0.000296716	4	80	843	225323
[OVER]	GO:0006406	mRNA export from nucleus	BIOLOGICAL_PROCESS	0.00487613	0.000302251	7	327	840	225076
[OVER]	GO:0009150	purine ribonucleotide metabolic process	BIOLOGICAL_PROCESS	0.00491824	0.000305262	22	2440	825	222963
[OVER]	GO:0061025	membrane fusion	BIOLOGICAL_PROCESS	0.0049743	0.000309146	12	938	835	224465
[OVER]	GO:0019217	regulation of fatty acid metabolic process	BIOLOGICAL_PROCESS	0.00502844	0.000312921	3	32	844	225371
[OVER]	GO:0009739	response to gibberellin	BIOLOGICAL_PROCESS	0.00529504	0.000330374	7	332	840	225071
[OVER]	GO:0048653	anther development	BIOLOGICAL_PROCESS	0.00537374	0.000335722	6	236	841	225167
[OVER]	GO:0080141	regulation of jasmonic acid biosynthetic process	BIOLOGICAL_PROCESS	0.00611696	0.000386141	2	6	845	225397
[OVER]	GO:0006569	tryptophan catabolic process	BIOLOGICAL_PROCESS	0.00616849	0.000390398	6	243	841	225160
[OVER]	GO:0043269	regulation of ion transport	BIOLOGICAL_PROCESS	0.00618715	0.000392587	12	964	835	224439
[OVER]	GO:0048586	regulation of long-day photoperiodism, flowering	BIOLOGICAL_PROCESS	0.00627139	0.000399976	3	35	844	225368
[OVER]	GO:0031325	positive regulation of cellular metabolic process	BIOLOGICAL_PROCESS	0.00632858	0.000404654	25	3005	822	222398
[OVER]	GO:0048582	positive regulation of post-embryonic development	BIOLOGICAL_PROCESS	0.00635268	0.00040723	6	245	841	225158
[OVER]	GO:0009788	negative regulation of abscisic acid-activated signaling pathway	BIOLOGICAL_PROCESS	0.00641269	0.000413689	5	159	842	225244
[OVER]	GO:0009793	embryo development ending in seed dormancy	BIOLOGICAL_PROCESS	0.00652755	0.000422162	21	2317	826	223086
[OVER]	GO:0051260	protein homooligomerization	BIOLOGICAL_PROCESS	0.00675178	0.000437213	4	89	843	225314
[OVER]	GO:0009851	auxin biosynthetic process	BIOLOGICAL_PROCESS	0.00727466	0.000472257	7	353	840	225050
[OVER]	GO:0007276	gamete generation	BIOLOGICAL_PROCESS	0.00753404	0.000494169	11	850	836	224553
[OVER]	GO:0070933	histone H4 deacetylation	BIOLOGICAL_PROCESS	0.00753404	0.000495233	2	7	845	225396
[OVER]	GO:1990619	histone H3-K9 deacetylation	BIOLOGICAL_PROCESS	0.00753404	0.000495233	2	7	845	225396
[OVER]	GO:1901601	strigolactone biosynthetic process	BIOLOGICAL_PROCESS	0.00753404	0.000495233	2	7	845	225396
[OVER]	GO:0019433	triglyceride catabolic process	BIOLOGICAL_PROCESS	0.00753404	0.000495233	2	7	845	225396
[OVER]	GO:0052577	germacrene-D synthase activity	MOLECULAR_FUNCTION	0.00753404	0.000495233	2	7	845	225396
[OVER]	GO:0034004	germacradienol synthase activity	MOLECULAR_FUNCTION	0.00753404	0.000495233	2	7	845	225396
[OVER]	GO:0019842	vitamin binding	MOLECULAR_FUNCTION	0.00778014	0.00051331	11	854	836	224549
[OVER]	GO:0006862	nucleotide transport	BIOLOGICAL_PROCESS	0.00785234	0.000520633	7	359	840	225044
[OVER]	GO:0047213	anthocyanidin 3-O-glucosyltransferase activity	MOLECULAR_FUNCTION	0.00785234	0.000520458	6	257	841	225146
[OVER]	GO:0006730	one-carbon metabolic process	BIOLOGICAL_PROCESS	0.00799729	0.000530895	6	258	841	225145
[OVER]	GO:0008295	spermidine biosynthetic process	BIOLOGICAL_PROCESS	0.00805904	0.000538276	3	39	844	225364
[OVER]	GO:0016805	dipeptidase activity	MOLECULAR_FUNCTION	0.00805904	0.000538276	3	39	844	225364
[OVER]	GO:0005765	lysosomal membrane	CELLULAR_COMPONENT	0.00805904	0.000538276	3	39	844	225364
[OVER]	GO:0051173	positive regulation of nitrogen compound metabolic process	BIOLOGICAL_PROCESS	0.00840332	0.000563324	24	2888	823	222515
[OVER]	GO:0009815	1-aminocyclopropane-1-carboxylate oxidase activity	MOLECULAR_FUNCTION	0.00858704	0.000577039	3	40	844	225363
[OVER]	GO:0009260	ribonucleotide biosynthetic process	BIOLOGICAL_PROCESS	0.00881447	0.000595194	15	1465	832	223938
[OVER]	GO:0006566	threonine metabolic process	BIOLOGICAL_PROCESS	0.00886107	0.000599888	5	173	842	225230
[OVER]	GO:0030512	negative regulation of transforming growth factor beta receptor signaling pathway	BIOLOGICAL_PROCESS	0.00901494	0.000617503	2	8	845	225395
[OVER]	GO:0050598	taxane 13-alpha-hydroxylase activity	MOLECULAR_FUNCTION	0.00901494	0.000617542	3	41	844	225362
[OVER]	GO:0008963	phospho-N-acetylmuramoyl-pentapeptide-transferase activity	MOLECULAR_FUNCTION	0.00901494	0.000617503	2	8	845	225395
[OVER]	GO:0005839	proteasome core complex	CELLULAR_COMPONENT	0.00903461	0.000619672	4	98	843	225305
[OVER]	GO:0030258	lipid modification	BIOLOGICAL_PROCESS	0.00932159	0.000640826	13	1168	834	224235
[OVER]	GO:0005681	spliceosomal complex	CELLULAR_COMPONENT	0.00935217	0.000644452	6	268	841	225135
[OVER]	GO:0010604	positive regulation of macromolecule metabolic process	BIOLOGICAL_PROCESS	0.00937411	0.000646727	24	2950	823	222453
[OVER]	GO:0009553	embryo sac development	BIOLOGICAL_PROCESS	0.00959958	0.00066541	11	882	836	224521
[OVER]	GO:0010256	endomembrane system organization	BIOLOGICAL_PROCESS	0.00976358	0.000677573	11	884	836	224519
[OVER]	GO:0046658	anchored component of plasma membrane	CELLULAR_COMPONENT	0.00978156	0.000679618	5	178	842	225225
[OVER]	GO:0009750	response to fructose	BIOLOGICAL_PROCESS	0.00983104	0.000684657	8	492	839	224911
[OVER]	GO:0009891	positive regulation of biosynthetic process	BIOLOGICAL_PROCESS	0.00983104	0.000683965	20	2256	827	223147
[OVER]	GO:0004298	threonine-type endopeptidase activity	MOLECULAR_FUNCTION	0.00988619	0.000690914	4	101	843	225302
[OVER]	GO:0035673	oligopeptide transmembrane transporter activity	MOLECULAR_FUNCTION	0.00988619	0.000690914	4	101	843	225302
