# Supplementary material for: Gene-Metabolite Network Analysis Revealed Tissue-Specific Accumulation of Therapeutic Metabolites in Mallotus japonicus
Source: Int J Mol Sci. 2021 Aug 17;22(16):8835. doi: 10.3390/ijms22168835 (PMC8396295; doi:10.3390/ijms22168835)
Supplement: Supplementary file 1 [file ijms-22-08835-s001.zip › Supplementary_Table S15_KEGG_pathway_mapping_for_TransM4_TransM9_WCNA_cluster_Megha.xlsx]

## Sheet: TransM4_TransM9cluster_KEGG_map
Table S15 KEGG pathway mapping of transcript modules TransM4 and TransM9 sharing high correlation coefficient (PCC > 0.7) with the metabolite module MetM7 containing rutin.
Enzyme	Pathway	Pathway ID	#Enzs in Pathway	#Seqs in Pathway	Seqs
ec:4.99.1.1 - ferrochelatase	Porphyrin and chlorophyll metabolism	map00860	22	2	Mj_1_GCCAAT_L005_R1_001_(paired)_trimmed_(paired)_contig_2668, TR53770|c0_g1_i1
ec:2.5.1.62 - synthase	Porphyrin and chlorophyll metabolism	map00860	22	1	TR57689|c0_g1_i1
ec:4.1.1.1 - decarboxylase	Glycolysis / Gluconeogenesis	map00010	22	1	TR74062|c0_g3_i2
ec:3.1.1.11 - pectin demethoxylase	Pentose and glucuronate interconversions	map00040	11	1	C939422
ec:3.2.1.51 - alpha-fucosidase	Other glycan degradation	map00511	4	3	TR71699|c0_g1_i3, TR71699|c0_g1_i2, TR56382|c0_g1_i1
ec:2.1.1.146 - O-methyltransferase	Phenylpropanoid biosynthesis	map00940	13	1	TR62826|c0_g2_i1
ec:1.1.1.284 - dehydrogenase	Methane metabolism	map00680	12	1	Mj_1_GCCAAT_L005_R1_001_(paired)_trimmed_(paired)_contig_12179
ec:3.1.1.3 - lipase	Glycerolipid metabolism	map00561	12	4	TR59414|c0_g1_i2, TR61044|c0_g1_i1, TR76217|c2_g1_i6, TR79067|c3_g3_i10
ec:2.7.7.60 - 4-phosphate cytidylyltransferase	Terpenoid backbone biosynthesis	map00900	12	1	TR64552|c0_g2_i1
ec:2.2.1.1 - glycolaldehydetransferase	Biosynthesis of ansamycins, Pentose phosphate pathway, Carbon fixation in photosynthetic organisms	map01051, map00030, map00710	1, 15, 19	1	Mj_1_GCCAAT_L005_R1_001_(paired)_trimmed_(paired)_contig_840
ec:5.1.3.5 - 4-epimerase	Amino sugar and nucleotide sugar metabolism	map00520	24	1	Mj_1_GCCAAT_L005_R1_001_(paired)_trimmed_(paired)_contig_13855
ec:6.1.1.6 - ligase	Aminoacyl-tRNA biosynthesis	map00970	20	1	Mj_1_GCCAAT_L005_R1_001_(paired)_trimmed_(paired)_contig_10804
ec:5.3.99.8 - synthase	Carotenoid biosynthesis	map00906	6	1	Mj_1_GCCAAT_L005_R1_001_(paired)_trimmed_(paired)_contig_13101
ec:3.1.3.75 - phosphatase	Glycerophospholipid metabolism	map00564	16	1	TR60489|c0_g1_i1
ec:2.4.1.223 - 4-alpha-N-acetylglucosaminyltransferase	Glycosaminoglycan biosynthesis - heparan sulfate / heparin	map00534	1	2	TR62844|c0_g1_i2, TR64381|c1_g1_i1
ec:4.3.3.2 - synthase	Indole alkaloid biosynthesis	map00901	1	1	TR68644|c0_g1_i1
ec:2.4.1.215 - O-beta-D-glucosyltransferase	Zeatin biosynthesis	map00908	3	3	Mj_1_GCCAAT_L005_R1_001_(paired)_trimmed_(paired)_contig_18129, TR70221|c1_g2_i6, TR78240|c0_g5_i2
ec:2.7.4.8 - kinase	Purine metabolism	map00230	17	1	Mj_1_GCCAAT_L005_R1_001_(paired)_trimmed_(paired)_contig_17851
ec:2.5.1.29 - diphosphate synthase	Terpenoid backbone biosynthesis	map00900	12	1	C960474
ec:2.5.1.32 - synthase	Carotenoid biosynthesis	map00906	6	1	TR68368|c0_g2_i1
ec:6.1.1.1 - ligase	Aminoacyl-tRNA biosynthesis	map00970	20	1	TR65663|c0_g1_i2
ec:2.3.1.85 - synthase system	Fatty acid biosynthesis	map00061	6	1	C960134
ec:2.5.1.1 - geranyl-diphosphate synthase	Terpenoid backbone biosynthesis	map00900	12	1	C960474
ec:2.7.1.1 - hexokinase type IV glucokinase	Amino sugar and nucleotide sugar metabolism, Glycolysis / Gluconeogenesis, Neomycin, kanamycin and gentamicin biosynthesis, Fructose and mannose metabolism, Starch and sucrose metabolism, Streptomycin biosynthesis, Galactose metabolism	map00520, map00010, map00524, map00051, map00500, map00521, map00052	24, 22, 2, 13, 23, 3, 18	1	Mj_1_GCCAAT_L005_R1_001_(paired)_trimmed_(paired)_contig_24277
ec:2.6.1.44 - transaminase	Cysteine and methionine metabolism, Glycine, serine and threonine metabolism, Alanine, aspartate and glutamate metabolism	map00270, map00260, map00250	14, 13, 12	1	TR49718|c0_g1_i1
ec:1.2.1.3 - dehydrogenase (NAD+)	Chloroalkane and chloroalkene degradation, Pyruvate metabolism, Glycolysis / Gluconeogenesis, Valine, leucine and isoleucine degradation, Glycerolipid metabolism, Insect hormone biosynthesis, Histidine metabolism, Tryptophan metabolism, Fatty acid degradation, Pantothenate and CoA biosynthesis, Ascorbate and aldarate metabolism, Lysine degradation, Limonene and pinene degradation, beta-Alanine me…	map00625, map00620, map00010, map00280, map00561, map00981, map00340, map00380, map00071, map00770, map00053, map00310, map00903, map00410, map00330	3, 21, 22, 7, 12, 1, 4, 11, 8, 4, 12, 5, 2, 5, 8	12	TR56409|c0_g1_i2, TR68787|c0_g2_i1, TR68787|c0_g2_i2, Mj_1_GCCAAT_L005_R1_001_(paired)_trimmed_(paired)_contig_8222, scaffold11904, TR67594|c2_g1_i3, scaffold11903, TR67365|c0_g1_i1, TR67482|c3_g3_i2, TR67482|c3_g3_i4, Mj_1_GCCAAT_L005_R1_001_(paired)_trimmed_(paired)_contig_18843, TR72401|c3_g1_i3
ec:4.3.1.24 - ammonia-lyase	Phenylpropanoid biosynthesis, Phenylalanine metabolism	map00940, map00360	13, 12	1	Mj_1_GCCAAT_L005_R1_001_(paired)_trimmed_(paired)_contig_2863
ec:2.7.2.3 - kinase	Glycolysis / Gluconeogenesis, Carbon fixation in photosynthetic organisms	map00010, map00710	22, 19	3	TR64739|c0_g1_i1, scaffold12045, Mj_1_GCCAAT_L005_R1_001_(paired)_trimmed_(paired)_contig_1023
ec:1.1.3.37 - oxidase	Ascorbate and aldarate metabolism	map00053	12	1	TR74234|c1_g3_i4
ec:3.1.3.41 - nitrophenyl phosphatase	Aminobenzoate degradation	map00627	7	1	TR72821|c0_g1_i1
ec:2.1.1.68 - O-methyltransferase	Phenylpropanoid biosynthesis	map00940	13	1	C966066
ec:1.23.5.1 - de-epoxidase	Carotenoid biosynthesis	map00906	6	4	Mj_1_GCCAAT_L005_R1_001_(paired)_trimmed_(paired)_contig_13121, TR67905|c0_g2_i2, Mj_1_GCCAAT_L005_R1_001_(paired)_trimmed_(paired)_contig_15031, TR67905|c0_g2_i5
ec:4.1.1.112 - decarboxylase	Pyruvate metabolism	map00620	21	3	TR61942|c1_g1_i1, TR56860|c0_g1_i1, TR56860|c0_g1_i2
ec:2.1.2.3 - formyltransferase	One carbon pool by folate, Purine metabolism	map00670, map00230	5, 17	1	Mj_1_GCCAAT_L005_R1_001_(paired)_trimmed_(paired)_contig_16459
ec:1.13.11.19 - dioxygenase	Taurine and hypotaurine metabolism	map00430	4	1	TR63535|c0_g2_i3
ec:2.7.1.23 - kinase	Nicotinate and nicotinamide metabolism	map00760	5	4	TR73999|c0_g2_i1, TR71360|c1_g1_i1, TR72887|c0_g2_i2, Mj_1_GCCAAT_L005_R1_001_(paired)_trimmed_(paired)_contig_21766
ec:4.1.1.33 - decarboxylase	Terpenoid backbone biosynthesis	map00900	12	1	Mj_1_GCCAAT_L005_R1_001_(paired)_trimmed_(paired)_contig_19051
ec:1.2.1.36 - dehydrogenase	Retinol metabolism	map00830	5	4	Mj_1_GCCAAT_L005_R1_001_(paired)_trimmed_(paired)_contig_8222, TR72401|c3_g1_i2, TR72401|c3_g1_i1, TR72401|c3_g1_i3
ec:2.8.1.4 - uracil 4-sulfurtransferase	Thiamine metabolism	map00730	7	1	TR60077|c0_g1_i2
ec:2.6.1.42 - transaminase	Valine, leucine and isoleucine degradation, Valine, leucine and isoleucine biosynthesis, Cysteine and methionine metabolism, Glucosinolate biosynthesis, Pantothenate and CoA biosynthesis	map00280, map00290, map00270, map00966, map00770	7, 2, 14, 1, 4	1	Mj_1_GCCAAT_L005_R1_001_(paired)_trimmed_(paired)_contig_13191
ec:1.1.1.193 - reductase	Riboflavin metabolism	map00740	4	1	TR58400|c0_g1_i2
ec:1.2.1.44 - reductase	Phenylpropanoid biosynthesis	map00940	13	1	TR66359|c0_g1_i1
ec:2.4.1.115 - 3-O-glucosyltransferase	Anthocyanin biosynthesis	map00942	1	1	Mj_1_GCCAAT_L005_R1_001_(paired)_trimmed_(paired)_contig_11167
ec:3.2.1.15 - pectin depolymerase (ambiguous)	Pentose and glucuronate interconversions	map00040	11	8	scaffold11158, TR56313|c0_g1_i1, TR70280|c0_g1_i6, Mj_1_GCCAAT_L005_R1_001_(paired)_trimmed_(paired)_contig_4832, Mj_1_GCCAAT_L005_R1_001_(paired)_trimmed_(paired)_contig_468, TR74703|c1_g1_i2, TR75771|c0_g1_i5, TR75771|c0_g1_i10
ec:3.1.2.6 - hydrolase	Pyruvate metabolism	map00620	21	1	TR64312|c1_g1_i2
ec:2.7.1.159 - 5/6-kinase	Phosphatidylinositol signaling system, Inositol phosphate metabolism	map04070, map00562	13, 13	1	Mj_1_GCCAAT_L005_R1_001_(paired)_trimmed_(paired)_contig_1858
ec:1.3.1.12 - dehydrogenase	Novobiocin biosynthesis, Phenylalanine, tyrosine and tryptophan biosynthesis	map00401, map00400	5, 14	1	TR78473|c2_g1_i1
ec:2.7.1.68 - 5-kinase	Phosphatidylinositol signaling system, Inositol phosphate metabolism	map04070, map00562	13, 13	1	TR76732|c1_g1_i2
ec:1.1.1.8 - dehydrogenase (NAD+)	Glycerophospholipid metabolism	map00564	16	2	TR58003|c0_g1_i1, TR58003|c0_g1_i4
ec:1.1.1.38 - dehydrogenase (oxaloacetate-decarboxylating)	Pyruvate metabolism	map00620	21	1	TR56860|c0_g1_i1
ec:4.1.3.27 - synthase	Phenazine biosynthesis, Phenylalanine, tyrosine and tryptophan biosynthesis	map00405, map00400	1, 14	2	TR47295|c0_g1_i2, TR47295|c0_g1_i1
ec:1.13.11.18 - dioxygenase	Sulfur metabolism	map00920	7	1	TR64312|c1_g1_i2
ec:1.3.3.4 - oxidase	Porphyrin and chlorophyll metabolism	map00860	22	2	TR61047|c0_g1_i1, Mj_1_GCCAAT_L005_R1_001_(paired)_trimmed_(paired)_contig_1006
ec:2.6.1.96 - transaminase	Butanoate metabolism, Alanine, aspartate and glutamate metabolism	map00650, map00250	8, 12	1	Mj_1_GCCAAT_L005_R1_001_(paired)_trimmed_(paired)_contig_11444
ec:1.2.1.88 - gamma-semialdehyde dehydrogenase	Arginine and proline metabolism, Alanine, aspartate and glutamate metabolism	map00330, map00250	8, 12	1	TR56409|c0_g1_i2
ec:4.4.1.16 - lyase	Selenocompound metabolism	map00450	4	1	TR54417|c0_g1_i1
ec:1.11.1.9 - peroxidase	Glutathione metabolism, Arachidonic acid metabolism	map00480, map00590	13, 3	1	Mj_1_GCCAAT_L005_R1_001_(paired)_trimmed_(paired)_contig_7442
ec:1.1.1.1 - dehydrogenase	Chloroalkane and chloroalkene degradation, Pyruvate metabolism, Glycolysis / Gluconeogenesis, Naphthalene degradation, Tyrosine metabolism, Retinol metabolism, Fatty acid degradation, Metabolism of xenobiotics by cytochrome P450, Drug metabolism - cytochrome P450, alpha-Linolenic acid metabolism, Glycine, serine and threonine metabolism	map00625, map00620, map00010, map00626, map00350, map00830, map00071, map00980, map00982, map00592, map00260	3, 21, 22, 1, 10, 5, 8, 7, 5, 6, 13	1	Mj_1_GCCAAT_L005_R1_001_(paired)_trimmed_(paired)_contig_23290
ec:1.1.3.9 - oxidase	Galactose metabolism	map00052	18	1	TR76152|c0_g1_i1
ec:2.7.8.1 - EPT	Ether lipid metabolism, Glycerophospholipid metabolism, Phosphonate and phosphinate metabolism	map00565, map00564, map00440	5, 16, 2	1	TR71229|c1_g2_i1
ec:6.1.1.17 - ligase	Aminoacyl-tRNA biosynthesis, Porphyrin and chlorophyll metabolism	map00970, map00860	20, 22	1	TR72572|c0_g2_i2
ec:2.5.1.85 - diphosphate synthase [geranylgeranyl-diphosphate specific]	Terpenoid backbone biosynthesis	map00900	12	1	Mj_1_GCCAAT_L005_R1_001_(paired)_trimmed_(paired)_contig_2392
ec:1.2.4.1 - dehydrogenase (acetyl-transferring)	Pyruvate metabolism, Glycolysis / Gluconeogenesis, Citrate cycle (TCA cycle)	map00620, map00010, map00020	21, 22, 11	1	TR56168|c1_g1_i2
ec:4.2.1.24 - synthase	Porphyrin and chlorophyll metabolism	map00860	22	1	TR64627|c0_g1_i2
ec:1.1.1.149 - dehydrogenase	Steroid hormone biosynthesis	map00140	8	1	TR52900|c0_g1_i2
ec:2.1.1.11 - protoporphyrin IX methyltransferase	Porphyrin and chlorophyll metabolism	map00860	22	2	TR72085|c2_g4_i2, Mj_1_GCCAAT_L005_R1_001_(paired)_trimmed_(paired)_contig_1070
ec:1.3.1.78 - dehydrogenase (NADP+)	Phenylalanine, tyrosine and tryptophan biosynthesis	map00400	14	1	TR78473|c2_g1_i1
ec:1.7.3.3 - urate hydroxylase	Caffeine metabolism, Purine metabolism	map00232, map00230	3, 17	3	TR62645|c0_g4_i3, Mj_1_GCCAAT_L005_R1_001_(paired)_trimmed_(paired)_contig_25836, TR62645|c0_g4_i5
ec:1.2.1.12 - dehydrogenase (phosphorylating)	Glycolysis / Gluconeogenesis, Carbon fixation in photosynthetic organisms	map00010, map00710	22, 19	1	C971648
ec:6.1.1.20 - ligase	Aminoacyl-tRNA biosynthesis	map00970	20	1	Mj_1_GCCAAT_L005_R1_001_(paired)_trimmed_(paired)_contig_4515
ec:1.14.15.3 - 1-monooxygenase	Caprolactam degradation, Fatty acid degradation	map00930, map00071	4, 8	4	TR67306|c0_g1_i4, Mj_1_GCCAAT_L005_R1_001_(paired)_trimmed_(paired)_contig_2610, TR67306|c0_g1_i3, TR67306|c0_g1_i2
ec:6.1.1.11 - ligase	Aminoacyl-tRNA biosynthesis	map00970	20	1	Mj_1_GCCAAT_L005_R1_001_(paired)_trimmed_(paired)_contig_2167
ec:5.5.1.6 - isomerase	Flavonoid biosynthesis	map00941	9	1	TR64329|c0_g1_i1
ec:1.1.3.15 - oxidase	Glyoxylate and dicarboxylate metabolism	map00630	19	1	Mj_1_GCCAAT_L005_R1_001_(paired)_trimmed_(paired)_contig_220
ec:2.3.2.2 - glutamyl transpeptidase	Taurine and hypotaurine metabolism, Glutathione metabolism, Cyanoamino acid metabolism	map00430, map00480, map00460	4, 13, 5	1	TR49718|c0_g1_i1
ec:2.4.1.82 - galactosyltransferase	Galactose metabolism	map00052	18	4	TR77559|c0_g2_i1, TR71761|c0_g1_i2, TR77559|c0_g2_i2, TR77559|c0_g2_i4
ec:2.7.4.3 - kinase	Thiamine metabolism, Purine metabolism	map00730, map00230	7, 17	1	TR75332|c0_g1_i1
ec:3.1.3.7 - nucleotidase	Sulfur metabolism	map00920	7	1	TR73341|c0_g1_i5
ec:1.2.1.13 - dehydrogenase (NADP+) (phosphorylating)	Carbon fixation in photosynthetic organisms	map00710	19	5	C971648, TR58942|c0_g1_i1, Mj_1_GCCAAT_L005_R1_001_(paired)_trimmed_(paired)_contig_2893, TR55600|c0_g1_i1, Mj_1_GCCAAT_L005_R1_001_(paired)_trimmed_(paired)_contig_587
ec:1.11.1.6 - equilase	Glyoxylate and dicarboxylate metabolism, Tryptophan metabolism	map00630, map00380	19, 11	1	TR53449|c0_g1_i1
ec:2.3.1.9 - C-acetyltransferase	Carbon fixation pathways in prokaryotes, Pyruvate metabolism, Benzoate degradation, Synthesis and degradation of ketone bodies, Valine, leucine and isoleucine degradation, Lysine degradation, Terpenoid backbone biosynthesis, Butanoate metabolism, Glyoxylate and dicarboxylate metabolism, Propanoate metabolism, Tryptophan metabolism, Fatty acid degradation	map00720, map00620, map00362, map00072, map00280, map00310, map00900, map00650, map00630, map00640, map00380, map00071	10, 21, 4, 1, 7, 5, 12, 8, 19, 8, 11, 8	1	Mj_1_GCCAAT_L005_R1_001_(paired)_trimmed_(paired)_contig_768
ec:6.2.1.1 - ligase	Carbon fixation pathways in prokaryotes, Pyruvate metabolism, Glycolysis / Gluconeogenesis, Glyoxylate and dicarboxylate metabolism, Propanoate metabolism, Methane metabolism	map00720, map00620, map00010, map00630, map00640, map00680	10, 21, 22, 19, 8, 12	4	C972690, Mj_1_GCCAAT_L005_R1_001_(paired)_trimmed_(paired)_contig_15859, TR74616|c1_g1_i4, TR74616|c1_g1_i7
ec:1.1.1.62 - 17-dehydrogenase	Steroid hormone biosynthesis	map00140	8	1	Mj_1_GCCAAT_L005_R1_001_(paired)_trimmed_(paired)_contig_2980
ec:5.4.2.6 - beta-pgm (gene name)	Starch and sucrose metabolism	map00500	23	3	TR71358|c0_g1_i5, TR71358|c0_g1_i4, Mj_1_GCCAAT_L005_R1_001_(paired)_trimmed_(paired)_contig_394
ec:6.6.1.1 - chelatase	Porphyrin and chlorophyll metabolism	map00860	22	1	Mj_1_GCCAAT_L005_R1_001_(paired)_trimmed_(paired)_contig_76
ec:1.3.1.81 - reductase	Monoterpenoid biosynthesis	map00902	2	1	TR78550|c3_g2_i3
ec:2.7.8.2 - cholinephosphotransferase	Ether lipid metabolism, Glycerophospholipid metabolism, Phosphonate and phosphinate metabolism	map00565, map00564, map00440	5, 16, 2	1	TR71229|c1_g2_i1
ec:3.1.2.14 - hydrolase	Fatty acid biosynthesis	map00061	6	1	C960134
ec:1.1.1.47 - 1-dehydrogenase [NAD(P)+]	Pentose phosphate pathway	map00030	15	1	Mj_1_GCCAAT_L005_R1_001_(paired)_trimmed_(paired)_contig_13
ec:3.5.1.32 - hydrolase	Phenylalanine metabolism	map00360	12	1	Mj_1_GCCAAT_L005_R1_001_(paired)_trimmed_(paired)_contig_9549
ec:2.5.1.54 - synthase	Phenylalanine, tyrosine and tryptophan biosynthesis	map00400	14	1	Mj_1_GCCAAT_L005_R1_001_(paired)_trimmed_(paired)_contig_6123
ec:3.1.1.45 - maleylacetate enol-lactonase	Fluorobenzoate degradation, Toluene degradation, Chlorocyclohexane and chlorobenzene degradation	map00364, map00623, map00361	1, 2, 3	1	TR57552|c0_g1_i1
ec:1.14.14.96 - 3'-monooxygenase	Stilbenoid, diarylheptanoid and gingerol biosynthesis, Phenylpropanoid biosynthesis, Flavonoid biosynthesis	map00945, map00940, map00941	2, 13, 9	3	TR56301|c0_g1_i2, TR56301|c0_g1_i4, TR54391|c0_g1_i3
ec:3.1.3.37 - SBPase	Carbon fixation in photosynthetic organisms	map00710	19	2	TR69583|c1_g1_i1, scaffold10980
ec:2.8.1.8 - synthase	Lipoic acid metabolism	map00785	2	1	Mj_1_GCCAAT_L005_R1_001_(paired)_trimmed_(paired)_contig_9923
ec:1.1.1.247 - reductase (NADPH)	Isoquinoline alkaloid biosynthesis	map00950	8	1	C962152
ec:2.5.1.47 - synthase	Cysteine and methionine metabolism, Sulfur metabolism	map00270, map00920	14, 7	8	TR59788|c0_g1_i2, Mj_1_GCCAAT_L005_R1_001_(paired)_trimmed_(paired)_contig_430, TR58598|c0_g2_i1, TR68095|c0_g3_i1, TR65450|c0_g1_i1, Mj_1_GCCAAT_L005_R1_001_(paired)_trimmed_(paired)_contig_1356, scaffold12772, scaffold12773
ec:6.1.1.5 - ligase	Aminoacyl-tRNA biosynthesis	map00970	20	1	TR78852|c0_g1_i1
ec:1.1.1.44 - dehydrogenase (NADP+-dependent, decarboxylating)	Glutathione metabolism, Pentose phosphate pathway	map00480, map00030	13, 15	1	Mj_1_GCCAAT_L005_R1_001_(paired)_trimmed_(paired)_contig_7397
ec:1.3.1.98 - dehydrogenase	Amino sugar and nucleotide sugar metabolism, Peptidoglycan biosynthesis	map00520, map00550	24, 2	2	TR65650|c1_g1_i2, TR65650|c1_g1_i1
ec:2.7.1.107 - kinase (ATP)	Glycerolipid metabolism, Phosphatidylinositol signaling system, Glycerophospholipid metabolism	map00561, map04070, map00564	12, 13, 16	1	Mj_1_GCCAAT_L005_R1_001_(paired)_trimmed_(paired)_contig_21766
ec:2.7.1.71 - kinase	Phenylalanine, tyrosine and tryptophan biosynthesis	map00400	14	1	TR58794|c0_g2_i1
ec:2.3.1.140 - synthase	Tyrosine metabolism	map00350	10	1	TR77575|c0_g1_i8
ec:5.4.99.5 - mutase	Phenylalanine, tyrosine and tryptophan biosynthesis	map00400	14	1	TR56560|c0_g1_i4
ec:2.4.1.25 - disproportionating enzyme	Starch and sucrose metabolism	map00500	23	1	Mj_1_GCCAAT_L005_R1_001_(paired)_trimmed_(paired)_contig_7641
ec:1.1.1.146 - dehydrogenase	Steroid hormone biosynthesis, Metabolism of xenobiotics by cytochrome P450	map00140, map00980	8, 7	1	TR52693|c0_g1_i1
ec:2.6.1.11 - transaminase	Arginine biosynthesis	map00220	9	1	Mj_1_GCCAAT_L005_R1_001_(paired)_trimmed_(paired)_contig_11444
ec:2.7.1.43 - glucuronokinase (phosphorylating)	Amino sugar and nucleotide sugar metabolism, Pentose and glucuronate interconversions, Ascorbate and aldarate metabolism	map00520, map00040, map00053	24, 11, 12	1	Mj_1_GCCAAT_L005_R1_001_(paired)_trimmed_(paired)_contig_24277
ec:4.1.2.13 - aldolase	Glycolysis / Gluconeogenesis, Pentose phosphate pathway, Fructose and mannose metabolism, Methane metabolism, Carbon fixation in photosynthetic organisms	map00010, map00030, map00051, map00680, map00710	22, 15, 13, 12, 19	1	Mj_1_GCCAAT_L005_R1_001_(paired)_trimmed_(paired)_contig_1013
ec:1.1.5.3 - dehydrogenase	Glycerophospholipid metabolism	map00564	16	1	TR69171|c1_g1_i2
ec:2.6.1.5 - transaminase	Tropane, piperidine and pyridine alkaloid biosynthesis, Ubiquinone and other terpenoid-quinone biosynthesis, Isoquinoline alkaloid biosynthesis, Tyrosine metabolism, Cysteine and methionine metabolism, Phenylalanine metabolism, Novobiocin biosynthesis, Phenylalanine, tyrosine and tryptophan biosynthesis	map00960, map00130, map00950, map00350, map00270, map00360, map00401, map00400	6, 5, 8, 10, 14, 12, 5, 14	2	TR70672|c0_g2_i2, TR69989|c1_g1_i3
ec:1.3.1.3 - 5beta-reductase	Primary bile acid biosynthesis, Steroid hormone biosynthesis	map00120, map00140	1, 8	1	Mj_1_GCCAAT_L005_R1_001_(paired)_trimmed_(paired)_contig_11950
ec:1.1.1.271 - synthase	Amino sugar and nucleotide sugar metabolism, O-Antigen nucleotide sugar biosynthesis, Fructose and mannose metabolism	map00520, map00541, map00051	24, 5, 13	4	TR46979|c0_g1_i1, Mj_1_GCCAAT_L005_R1_001_(paired)_trimmed_(paired)_contig_2728, TR47677|c0_g1_i1, scaffold14259
ec:1.11.1.7 - lactoperoxidase	Phenylpropanoid biosynthesis	map00940	13	1	Mj_1_GCCAAT_L005_R1_001_(paired)_trimmed_(paired)_contig_16365
ec:1.8.7.1 - sulfite reductase (ferredoxin)	Sulfur metabolism	map00920	7	1	TR73852|c1_g3_i1
ec:6.1.1.7 - ligase	Aminoacyl-tRNA biosynthesis	map00970	20	1	Mj_1_GCCAAT_L005_R1_001_(paired)_trimmed_(paired)_contig_1245
ec:3.1.3.2 - phosphatase	Thiamine metabolism, Riboflavin metabolism	map00730, map00740	7, 4	12	TR61562|c0_g1_i5, TR64061|c0_g1_i4, TR61562|c0_g1_i2, TR64278|c0_g1_i1, TR64061|c0_g1_i5, Mj_1_GCCAAT_L005_R1_001_(paired)_trimmed_(paired)_contig_16186, TR71921|c1_g2_i2, TR72327|c0_g2_i1, TR58928|c0_g1_i4, TR58928|c0_g1_i2, TR58928|c0_g1_i1, Mj_1_GCCAAT_L005_R1_001_(paired)_trimmed_(paired)_contig_1185
ec:2.4.2.19 - diphosphorylase (carboxylating)	Nicotinate and nicotinamide metabolism	map00760	5	1	Mj_1_GCCAAT_L005_R1_001_(paired)_trimmed_(paired)_contig_19529
ec:1.12.98.1 - F420 hydrogenase	Methane metabolism	map00680	12	1	TR67119|c0_g1_i3
ec:1.1.1.184 - reductase (NADPH)	Arachidonic acid metabolism, Metabolism of xenobiotics by cytochrome P450, Folate biosynthesis	map00590, map00980, map00790	3, 7, 8	3	TR56894|c1_g1_i1, TR56894|c0_g1_i1, Mj_1_GCCAAT_L005_R1_001_(paired)_trimmed_(paired)_contig_10168
ec:1.1.1.145 - dehydrogenase	Steroid hormone biosynthesis, Steroid degradation	map00140, map00984	8, 2	6	TR73135|c0_g1_i2, TR66359|c0_g1_i1, TR66581|c0_g1_i2, TR68557|c0_g1_i2, TR66359|c0_g1_i2, Mj_1_GCCAAT_L005_R1_001_(paired)_trimmed_(paired)_contig_11950
ec:2.3.1.61 - succinyltransferase	Lysine degradation, Tryptophan metabolism, Citrate cycle (TCA cycle)	map00310, map00380, map00020	5, 11, 11	1	TR73190|c0_g1_i6
ec:1.14.11.2 - 4-dioxygenase	Arginine and proline metabolism	map00330	8	1	TR55487|c0_g1_i1
ec:4.3.1.25 - ammonia-lyase	Phenylpropanoid biosynthesis, Phenylalanine metabolism	map00940, map00360	13, 12	1	Mj_1_GCCAAT_L005_R1_001_(paired)_trimmed_(paired)_contig_2863
ec:2.3.1.43 - O-acyltransferase	Glycerophospholipid metabolism	map00564	16	1	TR56045|c0_g1_i2
ec:1.3.1.1 - dehydrogenase (NAD+)	Pyrimidine metabolism, beta-Alanine metabolism, Pantothenate and CoA biosynthesis	map00240, map00410, map00770	9, 5, 4	1	TR58400|c0_g1_i2
ec:5.3.1.23 - isomerase	Cysteine and methionine metabolism	map00270	14	1	TR67879|c0_g5_i2
ec:1.3.5.2 - dehydrogenase (quinone)	Pyrimidine metabolism	map00240	9	1	TR69994|c0_g1_i1
ec:1.14.14.82 - 3'-monooxygenase	Flavone and flavonol biosynthesis, Flavonoid biosynthesis	map00944, map00941	2, 9	4	TR56301|c0_g1_i2, TR68133|c0_g2_i1, TR54391|c0_g1_i3, TR56301|c0_g1_i4
ec:1.1.1.82 - dehydrogenase (NADP+)	Pyruvate metabolism, Carbon fixation in photosynthetic organisms	map00620, map00710	21, 19	1	TR65834|c0_g1_i1
ec:1.11.1.11 - peroxidase	Glutathione metabolism, Ascorbate and aldarate metabolism	map00480, map00053	13, 12	9	TR64682|c0_g1_i1, Mj_1_GCCAAT_L005_R1_001_(paired)_trimmed_(paired)_contig_9736, TR60330|c0_g1_i6, TR60767|c0_g1_i2, TR71460|c0_g1_i7, TR75198|c0_g2_i5, Mj_1_GCCAAT_L005_R1_001_(paired)_trimmed_(paired)_contig_5750, TR60330|c0_g1_i4, TR71460|c0_g1_i3
ec:3.2.1.28 - trehalase	Starch and sucrose metabolism	map00500	23	1	TR72482|c0_g1_i6
ec:7.1.1.2 - reductase (H+-translocating)	Oxidative phosphorylation	map00190	4	1	Mj_1_GCCAAT_L005_R1_001_(paired)_trimmed_(paired)_contig_14743
ec:6.6.1.2 - hydrogenobyrinic acid a,c-diamide cobaltochelatase	Porphyrin and chlorophyll metabolism	map00860	22	1	Mj_1_GCCAAT_L005_R1_001_(paired)_trimmed_(paired)_contig_76
ec:1.6.5.7 - reductase	Chlorocyclohexane and chlorobenzene degradation, Aminobenzoate degradation	map00361, map00627	3, 7	1	TR53955|c0_g1_i1
ec:2.3.1.1 - N-acetyltransferase	Arginine biosynthesis	map00220	9	2	TR74941|c2_g1_i2, TR74941|c0_g1_i1
ec:2.1.1.141 - O-methyltransferase	alpha-Linolenic acid metabolism	map00592	6	1	TR57834|c0_g1_i1
ec:4.1.1.15 - decarboxylase	Taurine and hypotaurine metabolism, Butanoate metabolism, beta-Alanine metabolism, Alanine, aspartate and glutamate metabolism	map00430, map00650, map00410, map00250	4, 8, 5, 12	2	TR55432|c0_g1_i1, TR65018|c0_g1_i2
ec:3.2.1.21 - gentiobiase	Phenylpropanoid biosynthesis, Cyanoamino acid metabolism, Starch and sucrose metabolism	map00940, map00460, map00500	13, 5, 23	1	Mj_1_GCCAAT_L005_R1_001_(paired)_trimmed_(paired)_contig_1981
ec:1.1.1.40 - dehydrogenase (oxaloacetate-decarboxylating) (NADP+)	Pyruvate metabolism, Carbon fixation in photosynthetic organisms	map00620, map00710	21, 19	3	TR61942|c1_g1_i1, TR56860|c0_g1_i1, TR56860|c0_g1_i2
ec:6.2.1.4 - ligase (GDP-forming)	Propanoate metabolism, Citrate cycle (TCA cycle)	map00640, map00020	8, 11	1	TR56398|c0_g1_i1
ec:1.2.1.59 - dehydrogenase (NAD(P)+) (phosphorylating)	Glycolysis / Gluconeogenesis, Carbon fixation in photosynthetic organisms	map00010, map00710	22, 19	1	C971648
ec:2.7.1.46 - L-arabinokinase (phosphorylating)	Amino sugar and nucleotide sugar metabolism	map00520	24	1	Mj_1_GCCAAT_L005_R1_001_(paired)_trimmed_(paired)_contig_24277
ec:2.3.3.8 - citrate synthase	Carbon fixation pathways in prokaryotes, Citrate cycle (TCA cycle)	map00720, map00020	10, 11	1	TR56398|c0_g1_i1
ec:2.1.2.1 - hydroxymethyltransferase	Cyanoamino acid metabolism, One carbon pool by folate, Glyoxylate and dicarboxylate metabolism, Methane metabolism, Glycine, serine and threonine metabolism	map00460, map00670, map00630, map00680, map00260	5, 5, 19, 12, 13	1	Mj_1_GCCAAT_L005_R1_001_(paired)_trimmed_(paired)_contig_91
ec:3.5.1.2 - glutaminase I	Arginine biosynthesis, D-Glutamine and D-glutamate metabolism, Alanine, aspartate and glutamate metabolism	map00220, map00471, map00250	9, 1, 12	1	TR59547|c1_g1_i1
ec:6.1.1.2 - ligase	Aminoacyl-tRNA biosynthesis	map00970	20	1	TR74283|c0_g2_i4
ec:2.7.1.150 - 5-kinase	Phosphatidylinositol signaling system, Inositol phosphate metabolism	map04070, map00562	13, 13	1	TR76732|c1_g1_i2
ec:2.4.1.128 - glucosyltransferase	Phenylpropanoid biosynthesis	map00940	13	1	Mj_1_GCCAAT_L005_R1_001_(paired)_trimmed_(paired)_contig_36930
ec:4.1.1.39 - carboxylase	Glyoxylate and dicarboxylate metabolism, Carbon fixation in photosynthetic organisms	map00630, map00710	19, 19	1	Mj_1_GCCAAT_L005_R1_001_(paired)_trimmed_(paired)_contig_27724
ec:6.2.1.12 - ligase	Ubiquinone and other terpenoid-quinone biosynthesis, Phenylpropanoid biosynthesis	map00130, map00940	5, 13	1	Mj_1_GCCAAT_L005_R1_001_(paired)_trimmed_(paired)_contig_3698
ec:2.7.1.2 - glucokinase (phosphorylating)	Amino sugar and nucleotide sugar metabolism, Glycolysis / Gluconeogenesis, Neomycin, kanamycin and gentamicin biosynthesis, Starch and sucrose metabolism, Streptomycin biosynthesis, Galactose metabolism	map00520, map00010, map00524, map00500, map00521, map00052	24, 22, 2, 23, 3, 18	1	Mj_1_GCCAAT_L005_R1_001_(paired)_trimmed_(paired)_contig_24277
ec:1.11.1.12 - glutathione peroxidase	Glutathione metabolism	map00480	13	1	Mj_1_GCCAAT_L005_R1_001_(paired)_trimmed_(paired)_contig_7442
ec:3.1.1.26 - galactolipid lipase	Glycerolipid metabolism	map00561	12	1	TR59414|c0_g1_i2
ec:2.7.1.20 - kinase	Purine metabolism	map00230	17	1	TR66079|c0_g1_i1
ec:3.6.1.1 - diphosphatase	Oxidative phosphorylation	map00190	4	10	Mj_1_GCCAAT_L005_R1_001_(paired)_trimmed_(paired)_contig_14762, TR67620|c0_g1_i1, Mj_1_GCCAAT_L005_R1_001_(paired)_trimmed_(paired)_contig_11967, TR48979|c0_g1_i1, TR75376|c0_g1_i1, TR75376|c0_g1_i3, C966756, Mj_1_GCCAAT_L005_R1_001_(paired)_trimmed_(paired)_contig_78913, TR56725|c0_g1_i1, TR56278|c0_g1_i1
ec:1.4.4.2 - dehydrogenase (aminomethyl-transferring)	Glycine, serine and threonine metabolism	map00260	13	3	Mj_1_GCCAAT_L005_R1_001_(paired)_trimmed_(paired)_contig_3324, Mj_1_GCCAAT_L005_R1_001_(paired)_trimmed_(paired)_contig_1012, TR73844|c3_g2_i1
ec:1.1.1.29 - dehydrogenase	Glyoxylate and dicarboxylate metabolism, Methane metabolism, Glycine, serine and threonine metabolism	map00630, map00680, map00260	19, 12, 13	1	TR60967|c0_g1_i1
ec:1.1.1.36 - reductase	Butanoate metabolism, Glyoxylate and dicarboxylate metabolism	map00650, map00630	8, 19	1	Mj_1_GCCAAT_L005_R1_001_(paired)_trimmed_(paired)_contig_2980
ec:3.4.19.9 - gamma-glutamyl hydrolase	Folate biosynthesis	map00790	8	6	TR49718|c0_g1_i1, TR49718|c0_g1_i2, TR67321|c1_g1_i1, scaffold11631, Mj_1_GCCAAT_L005_R1_001_(paired)_trimmed_(paired)_contig_7184, TR40307|c0_g1_i1
ec:2.3.1.168 - (2-methylpropanoyl)transferase	Valine, leucine and isoleucine degradation, Propanoate metabolism	map00280, map00640	7, 8	2	TR59869|c0_g1_i1, TR66245|c0_g1_i1
ec:5.4.3.8 - 2,1-aminomutase	Porphyrin and chlorophyll metabolism	map00860	22	1	Mj_1_GCCAAT_L005_R1_001_(paired)_trimmed_(paired)_contig_3903
ec:1.1.1.294 - b reductase	Porphyrin and chlorophyll metabolism	map00860	22	1	Mj_1_GCCAAT_L005_R1_001_(paired)_trimmed_(paired)_contig_10168
ec:3.2.1.52 - hexosaminidase	Various types of N-glycan biosynthesis, Amino sugar and nucleotide sugar metabolism, Other glycan degradation, Glycosphingolipid biosynthesis - ganglio series, Glycosaminoglycan degradation, Glycosphingolipid biosynthesis - globo and isoglobo series	map00513, map00520, map00511, map00604, map00531, map00603	3, 24, 4, 2, 2, 2	1	Mj_1_GCCAAT_L005_R1_001_(paired)_trimmed_(paired)_contig_8573
ec:1.14.14.137 - acid 8'-hydroxylase	Carotenoid biosynthesis	map00906	6	1	Mj_1_GCCAAT_L005_R1_001_(paired)_trimmed_(paired)_contig_4211
ec:6.1.1.15 - ligase	Aminoacyl-tRNA biosynthesis	map00970	20	3	TR69744|c0_g1_i1, TR69856|c0_g1_i2, TR69744|c0_g1_i2
ec:4.1.1.31 - carboxylase	Carbon fixation pathways in prokaryotes, Pyruvate metabolism, Methane metabolism, Carbon fixation in photosynthetic organisms	map00720, map00620, map00680, map00710	10, 21, 12, 19	1	TR61942|c1_g1_i1
ec:2.3.1.12 - acetyltransferase	Pyruvate metabolism, Glycolysis / Gluconeogenesis, Citrate cycle (TCA cycle)	map00620, map00010, map00020	21, 22, 11	3	TR73190|c0_g1_i6, TR59869|c0_g1_i1, TR66245|c0_g1_i1
ec:2.7.1.105 - phosphofructokinase 2	Fructose and mannose metabolism	map00051	13	9	TR78891|c0_g1_i9, TR78891|c0_g1_i8, TR78891|c0_g1_i7, TR78891|c0_g1_i6, TR78891|c0_g1_i5, TR78891|c0_g1_i3, TR78891|c0_g1_i2, TR65744|c0_g1_i6, TR65744|c0_g1_i7
ec:4.3.3.6 - 5'-phosphate synthase (glutamine hydrolysing)	Vitamin B6 metabolism	map00750	3	1	Mj_1_GCCAAT_L005_R1_001_(paired)_trimmed_(paired)_contig_624
ec:2.7.7.41 - cytidylyltransferase	Phosphatidylinositol signaling system, Glycerophospholipid metabolism	map04070, map00564	13, 16	1	TR57518|c0_g1_i2
ec:3.2.1.24 - alpha-D-mannosidase	Other glycan degradation	map00511	4	1	Mj_1_GCCAAT_L005_R1_001_(paired)_trimmed_(paired)_contig_274
ec:2.7.1.134 - 1-kinase	Inositol phosphate metabolism	map00562	13	1	Mj_1_GCCAAT_L005_R1_001_(paired)_trimmed_(paired)_contig_1858
ec:1.2.1.38 - reductase	Arginine biosynthesis	map00220	9	1	TR79067|c3_g3_i10
ec:2.5.1.10 - diphosphate synthase	Terpenoid backbone biosynthesis	map00900	12	1	C960474
ec:2.5.1.3 - phosphate synthase	Thiamine metabolism	map00730	7	6	Mj_1_GCCAAT_L005_R1_001_(paired)_trimmed_(paired)_contig_5401, TR75779|c4_g3_i6, TR77705|c2_g6_i2, TR75779|c4_g3_i7, TR77705|c2_g6_i4, TR77705|c2_g6_i6
ec:1.8.1.4 - dehydrogenase	Pyruvate metabolism, Glycolysis / Gluconeogenesis, Valine, leucine and isoleucine degradation, Lysine degradation, Propanoate metabolism, Tryptophan metabolism, Citrate cycle (TCA cycle), Glycine, serine and threonine metabolism	map00620, map00010, map00280, map00310, map00640, map00380, map00020, map00260	21, 22, 7, 5, 8, 11, 11, 13	2	TR75071|c0_g1_i1, TR66830|c0_g1_i1
ec:2.3.1.181 - transferase	Lipoic acid metabolism	map00785	2	1	Mj_1_GCCAAT_L005_R1_001_(paired)_trimmed_(paired)_contig_30889
ec:1.1.1.49 - dehydrogenase (NADP+)	Glutathione metabolism, Pentose phosphate pathway	map00480, map00030	13, 15	1	Mj_1_GCCAAT_L005_R1_001_(paired)_trimmed_(paired)_contig_13306
ec:1.3.99.6 - 4-dehydrogenase	Steroid hormone biosynthesis	map00140	8	1	TR73135|c0_g1_i2
ec:5.1.3.1 - 3-epimerase	Pentose phosphate pathway, Pentose and glucuronate interconversions, Carbon fixation in photosynthetic organisms	map00030, map00040, map00710	15, 11, 19	3	scaffold11293, TR42759|c0_g1_i2, scaffold11292
ec:3.2.1.113 - 1,2-alpha-mannosidase	Various types of N-glycan biosynthesis, N-Glycan biosynthesis	map00513, map00510	3, 4	1	Mj_1_GCCAAT_L005_R1_001_(paired)_trimmed_(paired)_contig_274
ec:6.1.1.12 - ligase	Aminoacyl-tRNA biosynthesis	map00970	20	1	TR78140|c2_g2_i2
ec:1.3.1.42 - reductase	alpha-Linolenic acid metabolism	map00592	6	1	TR69160|c0_g1_i2
ec:2.7.6.5 - diphosphokinase	Purine metabolism	map00230	17	1	Mj_1_GCCAAT_L005_R1_001_(paired)_trimmed_(paired)_contig_6079
ec:4.2.1.1 - anhydrase	Nitrogen metabolism	map00910	7	11	Mj_1_GCCAAT_L005_R1_001_(paired)_trimmed_(paired)_contig_80, TR43952|c0_g1_i2, Mj_1_GCCAAT_L005_R1_001_(paired)_trimmed_(paired)_contig_809, TR43952|c0_g1_i1, Mj_1_GCCAAT_L005_R1_001_(paired)_trimmed_(paired)_contig_20009, TR26298|c0_g1_i1, scaffold12130, TR67452|c0_g1_i2, TR67452|c0_g1_i1, TR63596|c0_g1_i1, TR65767|c0_g1_i1
ec:1.5.3.1 - oxidase	Glycine, serine and threonine metabolism	map00260	13	1	TR72921|c0_g1_i1
ec:6.1.1.22 - ligase	Aminoacyl-tRNA biosynthesis	map00970	20	4	TR68013|c0_g1_i10, Mj_1_GCCAAT_L005_R1_001_(paired)_trimmed_(paired)_contig_8671, TR68013|c0_g1_i9, scaffold12831
ec:3.2.1.22 - melibiase	Sphingolipid metabolism, Glycerolipid metabolism, Galactose metabolism, Glycosphingolipid biosynthesis - globo and isoglobo series	map00600, map00561, map00052, map00603	5, 12, 18, 2	6	Mj_1_GCCAAT_L005_R1_001_(paired)_trimmed_(paired)_contig_20726, TR76282|c1_g1_i2, TR77559|c0_g2_i1, TR71761|c0_g1_i2, TR77559|c0_g2_i2, TR77559|c0_g2_i4
ec:1.2.1.4 - dehydrogenase (NADP+)	Caprolactam degradation	map00930	4	1	TR67594|c2_g1_i3
ec:2.5.1.84 - diphosphate synthase [geranyl-diphosphate specific]	Terpenoid backbone biosynthesis	map00900	12	3	Mj_1_GCCAAT_L005_R1_001_(paired)_trimmed_(paired)_contig_2392, TR72271|c0_g1_i1, scaffold1163
ec:2.2.1.6 - synthase	C5-Branched dibasic acid metabolism, Valine, leucine and isoleucine biosynthesis, Butanoate metabolism, Pantothenate and CoA biosynthesis	map00660, map00290, map00650, map00770	3, 2, 8, 4	4	Mj_1_GCCAAT_L005_R1_001_(paired)_trimmed_(paired)_contig_21972, Mj_1_GCCAAT_L005_R1_001_(paired)_trimmed_(paired)_contig_4731, TR65143|c0_g2_i2, TR65781|c0_g1_i2
ec:2.4.1.144 - 4-beta-N-acetylglucosaminyltransferase	N-Glycan biosynthesis	map00510	4	1	TR76166|c0_g1_i1
ec:1.8.1.7 - reductase	Glutathione metabolism	map00480	13	1	Mj_1_GCCAAT_L005_R1_001_(paired)_trimmed_(paired)_contig_20904
ec:1.1.1.2 - dehydrogenase (NADP+)	Pyruvate metabolism, Caprolactam degradation, Glycolysis / Gluconeogenesis, Glycerolipid metabolism, Pentose and glucuronate interconversions, Ascorbate and aldarate metabolism	map00620, map00930, map00010, map00561, map00040, map00053	21, 4, 22, 12, 11, 12	8	TR57600|c0_g1_i2, TR56901|c0_g1_i1, TR52900|c0_g1_i2, TR56901|c0_g1_i4, TR56901|c0_g1_i3, TR57600|c0_g1_i1, TR57653|c0_g1_i1, TR57600|c0_g1_i4
ec:5.4.2.3 - mutase	Amino sugar and nucleotide sugar metabolism	map00520	24	1	Mj_1_GCCAAT_L005_R1_001_(paired)_trimmed_(paired)_contig_11393
ec:3.4.19.13 - gamma-glutamate hydrolase	Glutathione metabolism	map00480	13	2	TR49718|c0_g1_i1, TR49718|c0_g1_i2
ec:1.1.1.219 - 4-reductase	Flavonoid biosynthesis	map00941	9	1	TR66359|c0_g1_i1
ec:3.1.1.31 - phosphogluconolactonase	Pentose phosphate pathway	map00030	15	1	TR55494|c0_g1_i2
ec:4.1.1.32 - carboxykinase (GTP)	Pyruvate metabolism, Glycolysis / Gluconeogenesis, Citrate cycle (TCA cycle)	map00620, map00010, map00020	21, 22, 11	4	TR68854|c3_g5_i2, TR68854|c3_g5_i3, TR68854|c3_g5_i5, TR61942|c1_g1_i1
ec:5.1.3.2 - 4-epimerase	Amino sugar and nucleotide sugar metabolism, O-Antigen nucleotide sugar biosynthesis, Galactose metabolism	map00520, map00541, map00052	24, 5, 18	2	Mj_1_GCCAAT_L005_R1_001_(paired)_trimmed_(paired)_contig_13855, TR67358|c0_g1_i1
ec:4.1.2.14 - aldolase	Pentose phosphate pathway	map00030	15	1	TR65687|c0_g1_i1
ec:1.1.1.26 - reductase	Glyoxylate and dicarboxylate metabolism	map00630	19	1	scaffold10753
ec:2.7.7.44 - uridylyltransferase	Amino sugar and nucleotide sugar metabolism, Pentose and glucuronate interconversions, Ascorbate and aldarate metabolism	map00520, map00040, map00053	24, 11, 12	1	TR75538|c1_g1_i1
ec:1.6.1.1 - transhydrogenase (Si-specific)	Nicotinate and nicotinamide metabolism	map00760	5	1	TR65834|c0_g1_i1
ec:2.1.1.41 - 24-C-methyltransferase	Steroid biosynthesis	map00100	3	1	TR61926|c0_g1_i1
ec:2.10.1.1 - molybdotransferase	Folate biosynthesis	map00790	8	1	TR75217|c0_g1_i4
ec:1.14.14.1 - monooxygenase	Arachidonic acid metabolism, Aminobenzoate degradation, Caffeine metabolism, Steroid hormone biosynthesis, Retinol metabolism, Tryptophan metabolism, Fatty acid degradation, Metabolism of xenobiotics by cytochrome P450, Drug metabolism - cytochrome P450, Linoleic acid metabolism	map00590, map00627, map00232, map00140, map00830, map00380, map00071, map00980, map00982, map00591	3, 7, 3, 8, 5, 11, 8, 7, 5, 1	1	Mj_1_GCCAAT_L005_R1_001_(paired)_trimmed_(paired)_contig_2438
ec:2.4.1.18 - branching enzyme	Starch and sucrose metabolism	map00500	23	1	C973976
ec:3.2.1.23 - lactase (ambiguous)	Sphingolipid metabolism, Other glycan degradation, Glycosphingolipid biosynthesis - ganglio series, Glycosaminoglycan degradation, Galactose metabolism	map00600, map00511, map00604, map00531, map00052	5, 4, 2, 2, 18	2	TR62687|c0_g1_i1, scaffold1419
ec:5.3.1.8 - isomerase	Amino sugar and nucleotide sugar metabolism, O-Antigen nucleotide sugar biosynthesis, Fructose and mannose metabolism	map00520, map00541, map00051	24, 5, 13	1	TR67242|c0_g2_i1
ec:2.4.1.14 - synthase	Starch and sucrose metabolism	map00500	23	1	Mj_1_GCCAAT_L005_R1_001_(paired)_trimmed_(paired)_contig_2392
ec:6.1.1.14 - ligase	Aminoacyl-tRNA biosynthesis	map00970	20	1	TR74219|c0_g1_i2
ec:4.2.1.130 - dehydratase	Pyruvate metabolism	map00620	21	1	Mj_1_GCCAAT_L005_R1_001_(paired)_trimmed_(paired)_contig_7735
ec:3.1.4.3 - C	Ether lipid metabolism, Glycerophospholipid metabolism, Inositol phosphate metabolism	map00565, map00564, map00562	5, 16, 13	1	Mj_1_GCCAAT_L005_R1_001_(paired)_trimmed_(paired)_contig_624
ec:2.7.1.21 - kinase	Pyrimidine metabolism, Drug metabolism - other enzymes	map00240, map00983	9, 9	1	TR67906|c0_g2_i3
ec:2.3.1.20 - O-acyltransferase	Glycerolipid metabolism, Cutin, suberine and wax biosynthesis	map00561, map00073	12, 1	1	TR77367|c2_g3_i4
ec:3.1.4.11 - phospholipase C	Phosphatidylinositol signaling system, Inositol phosphate metabolism	map04070, map00562	13, 13	1	Mj_1_GCCAAT_L005_R1_001_(paired)_trimmed_(paired)_contig_624
ec:3.1.4.12 - phosphodiesterase	Sphingolipid metabolism	map00600	5	2	TR56319|c2_g1_i1, TR70359|c0_g2_i1
ec:1.14.13.82 - monooxygenase	Aminobenzoate degradation	map00627	7	1	TR58785|c0_g1_i1
ec:2.7.1.82 - kinase	Glycerophospholipid metabolism	map00564	16	1	TR73290|c1_g2_i1
ec:2.7.1.44 - galacturonokinase (phosphorylating) D-galacturonic acid kinase	Amino sugar and nucleotide sugar metabolism	map00520	24	1	Mj_1_GCCAAT_L005_R1_001_(paired)_trimmed_(paired)_contig_24277
ec:2.7.7.10 - uridylyltransferase	Amino sugar and nucleotide sugar metabolism, Galactose metabolism	map00520, map00052	24, 18	1	TR75538|c1_g1_i1
ec:1.1.1.237 - reductase	Tropane, piperidine and pyridine alkaloid biosynthesis, Ubiquinone and other terpenoid-quinone biosynthesis, Tyrosine metabolism, Phenylalanine metabolism	map00960, map00130, map00350, map00360	6, 5, 10, 12	1	scaffold10753
ec:4.2.1.17 - hydratase	Caprolactam degradation, Valine, leucine and isoleucine degradation, Aminobenzoate degradation, Tryptophan metabolism, Fatty acid degradation, alpha-Linolenic acid metabolism, Fatty acid elongation, Carbon fixation pathways in prokaryotes, Benzoate degradation, Geraniol degradation, Lysine degradation, Butanoate metabolism, Limonene and pinene degradation, Phenylalanine metabolism, Propanoate met…	map00930, map00280, map00627, map00380, map00071, map00592, map00062, map00720, map00362, map00281, map00310, map00650, map00903, map00360, map00640, map00410	4, 7, 7, 11, 8, 6, 3, 10, 4, 2, 5, 8, 2, 12, 8, 5	1	TR68655|c1_g1_i1
ec:4.4.1.5 - lyase	Pyruvate metabolism	map00620	21	1	TR57064|c0_g1_i2
ec:5.3.1.1 - isomerase	Glycolysis / Gluconeogenesis, Fructose and mannose metabolism, Carbon fixation in photosynthetic organisms, Inositol phosphate metabolism	map00010, map00051, map00710, map00562	22, 13, 19, 13	1	Mj_1_GCCAAT_L005_R1_001_(paired)_trimmed_(paired)_contig_247
ec:2.1.1.140 - ec:2.1.1.140 (S)-coclaurine-N-methyltransferase	Isoquinoline alkaloid biosynthesis	map00950	8	6	TR54878|c0_g1_i6, TR55320|c0_g1_i1, TR54878|c0_g1_i2, TR55320|c0_g1_i2, TR54878|c0_g1_i5, TR55320|c0_g1_i3
ec:1.1.1.206 - reductase I	Tropane, piperidine and pyridine alkaloid biosynthesis	map00960	6	1	C954748
ec:3.2.1.26 - invertase	Starch and sucrose metabolism, Galactose metabolism	map00500, map00052	23, 18	8	TR65773|c0_g1_i2, Mj_1_GCCAAT_L005_R1_001_(paired)_trimmed_(paired)_contig_3520, C972144, TR64495|c0_g1_i1, TR70088|c0_g1_i1, TR57038|c0_g1_i2, scaffold14387, Mj_1_GCCAAT_L005_R1_001_(paired)_trimmed_(paired)_contig_10234
ec:1.1.1.60 - reductase	Glyoxylate and dicarboxylate metabolism	map00630	19	5	TR58958|c0_g1_i1, TR65650|c1_g1_i2, TR65650|c1_g1_i1, TR65456|c0_g1_i2, Mj_1_GCCAAT_L005_R1_001_(paired)_trimmed_(paired)_contig_7397
ec:6.2.1.26 - ligase	Ubiquinone and other terpenoid-quinone biosynthesis	map00130	5	1	C972690
ec:2.7.1.19 - phosphopentokinase	Carbon fixation in photosynthetic organisms	map00710	19	1	TR57612|c0_g1_i1
ec:1.3.1.33 - reductase	Porphyrin and chlorophyll metabolism	map00860	22	1	Mj_1_GCCAAT_L005_R1_001_(paired)_trimmed_(paired)_contig_1798
ec:6.3.4.21 - phosphoribosyltransferase	Nicotinate and nicotinamide metabolism	map00760	5	3	TR65058|c0_g1_i2, Mj_1_GCCAAT_L005_R1_001_(paired)_trimmed_(paired)_contig_19529, TR65058|c0_g1_i1
ec:2.7.1.6 - galactokinase (phosphorylating)	Amino sugar and nucleotide sugar metabolism, Galactose metabolism	map00520, map00052	24, 18	1	Mj_1_GCCAAT_L005_R1_001_(paired)_trimmed_(paired)_contig_24277
ec:2.4.1.34 - synthase	Starch and sucrose metabolism	map00500	23	1	Mj_1_GCCAAT_L005_R1_001_(paired)_trimmed_(paired)_contig_40571
ec:2.5.1.18 - transferase	Glutathione metabolism, Drug metabolism - other enzymes, Metabolism of xenobiotics by cytochrome P450, Drug metabolism - cytochrome P450	map00480, map00983, map00980, map00982	13, 9, 7, 5	1	TR52364|c0_g1_i1
ec:6.3.3.1 - cyclo-ligase	Purine metabolism	map00230	17	1	TR69643|c2_g1_i1
ec:1.2.1.8 - dehydrogenase	Glycine, serine and threonine metabolism	map00260	13	2	TR67482|c3_g3_i4, TR67482|c3_g3_i2
ec:1.14.19.62 - synthase	Monoterpenoid biosynthesis	map00902	2	1	Mj_1_GCCAAT_L005_R1_001_(paired)_trimmed_(paired)_contig_7975
ec:6.3.3.2 - cyclo-ligase	One carbon pool by folate	map00670	5	1	TR69031|c0_g1_i1
ec:2.7.7.4 - adenylyltransferase	Monobactam biosynthesis, Sulfur metabolism, Purine metabolism, Selenocompound metabolism	map00261, map00920, map00230, map00450	2, 7, 17, 4	4	TR47295|c0_g1_i2, TR69679|c0_g1_i1, TR47295|c0_g1_i1, TR69679|c0_g1_i2
ec:3.1.3.11 - hexose diphosphatase	Glycolysis / Gluconeogenesis, Pentose phosphate pathway, Fructose and mannose metabolism, Methane metabolism, Carbon fixation in photosynthetic organisms	map00010, map00030, map00051, map00680, map00710	22, 15, 13, 12, 19	1	Mj_1_GCCAAT_L005_R1_001_(paired)_trimmed_(paired)_contig_1040
ec:1.18.1.2 - reductase	Photosynthesis	map00195	2	1	Mj_1_GCCAAT_L005_R1_001_(paired)_trimmed_(paired)_contig_248
ec:1.10.3.3 - oxidase	Ascorbate and aldarate metabolism	map00053	12	1	Mj_1_GCCAAT_L005_R1_001_(paired)_trimmed_(paired)_contig_196
ec:1.3.5.1 - dehydrogenase	Carbon fixation pathways in prokaryotes, Oxidative phosphorylation, Butanoate metabolism, Citrate cycle (TCA cycle)	map00720, map00190, map00650, map00020	10, 4, 8, 11	1	TR67732|c2_g1_i5
ec:2.8.1.1 - sulfurtransferase	Sulfur metabolism	map00920	7	1	TR54115|c0_g1_i1
ec:1.13.11.51 - dioxygenase	Carotenoid biosynthesis	map00906	6	1	Mj_1_GCCAAT_L005_R1_001_(paired)_trimmed_(paired)_contig_2588
ec:2.7.11.13 - kinase C	Phosphatidylinositol signaling system	map04070	13	1	Mj_1_GCCAAT_L005_R1_001_(paired)_trimmed_(paired)_contig_6733
ec:2.7.1.31 - 3-kinase	Glycerolipid metabolism, Glyoxylate and dicarboxylate metabolism, Glycine, serine and threonine metabolism	map00561, map00630, map00260	12, 19, 13	1	TR68625|c0_g1_i1
ec:2.6.1.1 - transaminase	Tropane, piperidine and pyridine alkaloid biosynthesis, Arginine biosynthesis, Isoquinoline alkaloid biosynthesis, Tyrosine metabolism, Cysteine and methionine metabolism, Phenylalanine metabolism, Arginine and proline metabolism, Novobiocin biosynthesis, Phenylalanine, tyrosine and tryptophan biosynthesis, Carbon fixation in photosynthetic organisms, Alanine, aspartate and glutamate metabolism	map00960, map00220, map00950, map00350, map00270, map00360, map00330, map00401, map00400, map00710, map00250	6, 9, 8, 10, 14, 12, 8, 5, 14, 19, 12	1	TR51632|c0_g1_i1
ec:3.1.3.56 - 5-phosphatase	Phosphatidylinositol signaling system, Inositol phosphate metabolism	map04070, map00562	13, 13	1	TR62292|c0_g1_i3
ec:2.1.1.143 - C-methyltransferase	Steroid biosynthesis	map00100	3	1	TR61926|c0_g1_i1
ec:2.4.1.1 - phosphorylase	Starch and sucrose metabolism	map00500	23	1	Mj_1_GCCAAT_L005_R1_001_(paired)_trimmed_(paired)_contig_15899
ec:1.4.7.1 - synthase (ferredoxin)	Glyoxylate and dicarboxylate metabolism, Nitrogen metabolism	map00630, map00910	19, 7	4	Mj_1_GCCAAT_L005_R1_001_(paired)_trimmed_(paired)_contig_1834, Mj_1_GCCAAT_L005_R1_001_(paired)_trimmed_(paired)_contig_1506, Mj_1_GCCAAT_L005_R1_001_(paired)_trimmed_(paired)_contig_5552, TR79537|c2_g1_i1
ec:6.3.2.17 - synthase	Folate biosynthesis	map00790	8	1	Mj_1_GCCAAT_L005_R1_001_(paired)_trimmed_(paired)_contig_6049
ec:6.1.1.4 - ligase	Aminoacyl-tRNA biosynthesis	map00970	20	1	Mj_1_GCCAAT_L005_R1_001_(paired)_trimmed_(paired)_contig_21700
ec:2.1.1.104 - O-methyltransferase	Stilbenoid, diarylheptanoid and gingerol biosynthesis, Phenylpropanoid biosynthesis, Flavonoid biosynthesis	map00945, map00940, map00941	2, 13, 9	1	Mj_1_GCCAAT_L005_R1_001_(paired)_trimmed_(paired)_contig_8447
ec:1.1.1.94 - dehydrogenase [NAD(P)+]	Glycerophospholipid metabolism	map00564	16	1	TR58003|c0_g1_i1
ec:2.7.6.2 - diphosphokinase	Thiamine metabolism	map00730	7	1	TR55904|c0_g1_i1
ec:4.1.2.10 - lyase	Cyanoamino acid metabolism	map00460	5	1	TR63563|c0_g1_i1
ec:2.4.1.198 - N-acetylglucosaminyltransferase	Glycosylphosphatidylinositol (GPI)-anchor biosynthesis	map00563	1	1	Mj_1_GCCAAT_L005_R1_001_(paired)_trimmed_(paired)_contig_19648
ec:1.14.11.9 - 3-dioxygenase	Flavonoid biosynthesis	map00941	9	1	TR58415|c0_g1_i1
ec:6.3.5.5 - synthase (glutamine-hydrolysing)	Pyrimidine metabolism, Alanine, aspartate and glutamate metabolism	map00240, map00250	9, 12	1	scaffold13867
ec:1.7.1.2 - reductase [NAD(P)H]	Nitrogen metabolism	map00910	7	1	Mj_1_GCCAAT_L005_R1_001_(paired)_trimmed_(paired)_contig_6489
ec:2.5.1.31 - synthase [(2E,6E)-farnesyl-diphosphate specific]	Terpenoid backbone biosynthesis, Peptidoglycan biosynthesis	map00900, map00550	12, 2	4	TR60683|c0_g1_i2, TR60683|c0_g1_i3, TR60887|c0_g1_i2, TR60683|c0_g1_i4
ec:2.7.1.11 - phosphohexokinase	Glycolysis / Gluconeogenesis, Pentose phosphate pathway, Fructose and mannose metabolism, Methane metabolism, Galactose metabolism	map00010, map00030, map00051, map00680, map00052	22, 15, 13, 12, 18	1	Mj_1_GCCAAT_L005_R1_001_(paired)_trimmed_(paired)_contig_3546
ec:3.1.1.32 - A1	Glycerophospholipid metabolism, alpha-Linolenic acid metabolism	map00564, map00592	16, 6	1	TR74461|c0_g1_i1
ec:2.7.1.15 - deoxyribokinase	Pentose phosphate pathway	map00030	15	1	TR64027|c0_g1_i3
ec:1.1.1.88 - reductase	Terpenoid backbone biosynthesis	map00900	12	1	TR64461|c0_g1_i2
ec:1.14.14.37 - oxime monooxygenase	Cyanoamino acid metabolism	map00460	5	1	Mj_1_GCCAAT_L005_R1_001_(paired)_trimmed_(paired)_contig_13163
ec:5.4.2.2 - (alpha-D-glucose-1,6-bisphosphate-dependent)	Amino sugar and nucleotide sugar metabolism, Glycolysis / Gluconeogenesis, Pentose phosphate pathway, Starch and sucrose metabolism, Purine metabolism, Streptomycin biosynthesis, Galactose metabolism	map00520, map00010, map00030, map00500, map00230, map00521, map00052	24, 22, 15, 23, 17, 3, 18	1	Mj_1_GCCAAT_L005_R1_001_(paired)_trimmed_(paired)_contig_1543
ec:4.1.3.17 - aldolase	Benzoate degradation, C5-Branched dibasic acid metabolism	map00362, map00660	4, 3	2	TR56860|c0_g1_i1, TR56860|c0_g1_i2
ec:5.1.3.3 - 1-epimerase	Glycolysis / Gluconeogenesis, Galactose metabolism	map00010, map00052	22, 18	1	TR71445|c1_g6_i10
ec:2.1.2.10 - S-aminomethyldihydrolipoylprotein:(6S)-tetrahydrofolate aminomethyltransferase (ammonia-forming)	One carbon pool by folate, Glycine, serine and threonine metabolism	map00670, map00260	5, 13	1	TR51117|c0_g1_i1
ec:1.3.1.75 - protochlorophyllide a 8-vinyl-reductase (NADPH)	Porphyrin and chlorophyll metabolism	map00860	22	1	Mj_1_GCCAAT_L005_R1_001_(paired)_trimmed_(paired)_contig_10691
ec:3.1.1.23 - lipase	Glycerolipid metabolism	map00561	12	1	TR55132|c0_g2_i2
ec:2.4.1.12 - synthase (UDP-forming)	Starch and sucrose metabolism	map00500	23	1	Mj_1_GCCAAT_L005_R1_001_(paired)_trimmed_(paired)_contig_182
ec:6.1.1.18 - ligase	Aminoacyl-tRNA biosynthesis	map00970	20	1	TR72843|c2_g1_i4
ec:2.4.1.203 - O-beta-D-glucosyltransferase	Zeatin biosynthesis	map00908	3	1	Mj_1_GCCAAT_L005_R1_001_(paired)_trimmed_(paired)_contig_18129
ec:3.5.4.26 - deaminase	Riboflavin metabolism	map00740	4	2	TR58400|c0_g1_i2, TR69994|c0_g1_i1
ec:3.1.3.3 - phosphatase	Methane metabolism, Glycine, serine and threonine metabolism	map00680, map00260	12, 13	1	TR79656|c2_g2_i2
ec:2.8.1.9 - cofactor sulfurtransferase	Folate biosynthesis	map00790	8	1	TR56888|c0_g1_i2
ec:2.8.1.2 - sulfurtransferase	Cysteine and methionine metabolism	map00270	14	1	TR75108|c0_g1_i2
ec:3.1.3.67 - 3-phosphatase	Phosphatidylinositol signaling system, Inositol phosphate metabolism	map04070, map00562	13, 13	1	TR69325|c0_g1_i2
ec:3.1.4.4 - D	Ether lipid metabolism, Glycerophospholipid metabolism	map00565, map00564	5, 16	2	Mj_1_GCCAAT_L005_R1_001_(paired)_trimmed_(paired)_contig_760, TR13565|c0_g1_i1
ec:1.17.4.1 - reductase	Pyrimidine metabolism, Glutathione metabolism, Drug metabolism - other enzymes, Purine metabolism	map00240, map00480, map00983, map00230	9, 13, 9, 17	2	TR63570|c0_g1_i1, TR66318|c0_g1_i1
ec:2.5.1.61 - synthase	Porphyrin and chlorophyll metabolism	map00860	22	1	TR54630|c0_g1_i1
ec:3.2.1.20 - maltase	Starch and sucrose metabolism, Galactose metabolism	map00500, map00052	23, 18	9	TR65773|c0_g1_i2, TR79274|c2_g1_i1, Mj_1_GCCAAT_L005_R1_001_(paired)_trimmed_(paired)_contig_3520, C972144, TR64495|c0_g1_i1, TR57038|c0_g1_i2, Mj_1_GCCAAT_L005_R1_001_(paired)_trimmed_(paired)_contig_3805, TR78546|c0_g1_i1, Mj_1_GCCAAT_L005_R1_001_(paired)_trimmed_(paired)_contig_10234
ec:6.3.1.2 - synthetase	Arginine biosynthesis, Glyoxylate and dicarboxylate metabolism, Nitrogen metabolism, Alanine, aspartate and glutamate metabolism	map00220, map00630, map00910, map00250	9, 19, 7, 12	1	TR49701|c0_g1_i1
ec:2.7.11.24 - protein kinase	mTOR signaling pathway	map04150	1	1	TR54776|c0_g1_i1
ec:2.4.2.14 - phosphoribosyldiphosphate 5-amidotransferase	Purine metabolism, Alanine, aspartate and glutamate metabolism	map00230, map00250	17, 12	1	TR64446|c0_g1_i1
ec:2.6.1.4 - transaminase	Glyoxylate and dicarboxylate metabolism, Glycine, serine and threonine metabolism	map00630, map00260	19, 13	1	TR49718|c0_g1_i1
ec:1.14.13.81 - IX monomethyl ester (oxidative) cyclase	Porphyrin and chlorophyll metabolism	map00860	22	1	Mj_1_GCCAAT_L005_R1_001_(paired)_trimmed_(paired)_contig_2613
ec:6.4.1.2 - carboxylase	Carbon fixation pathways in prokaryotes, Pyruvate metabolism, Aflatoxin biosynthesis, Fatty acid biosynthesis, Propanoate metabolism	map00720, map00620, map00254, map00061, map00640	10, 21, 1, 6, 8	1	Mj_1_GCCAAT_L005_R1_001_(paired)_trimmed_(paired)_contig_3535
ec:2.4.1.67 - galactosyltransferase	Galactose metabolism	map00052	18	1	TR71761|c0_g1_i2
ec:3.1.1.14 - CLH	Porphyrin and chlorophyll metabolism	map00860	22	1	TR68021|c0_g1_i1
ec:1.3.3.3 - oxidase	Porphyrin and chlorophyll metabolism	map00860	22	2	TR54280|c1_g1_i1, TR54280|c1_g1_i2
ec:1.14.19.1 - 9-desaturase	Biosynthesis of unsaturated fatty acids	map01040	2	1	TR71345|c0_g2_i2
ec:2.7.10.2 - protein-tyrosine kinase	T cell receptor signaling pathway	map04660	2	1	Mj_1_GCCAAT_L005_R1_001_(paired)_trimmed_(paired)_contig_1641
ec:1.1.3.8 - oxidase	Ascorbate and aldarate metabolism	map00053	12	1	TR74234|c1_g3_i4
ec:2.5.1.75 - dimethylallyltransferase	Zeatin biosynthesis	map00908	3	3	TR68043|c0_g1_i5, TR68043|c0_g1_i4, TR68043|c1_g1_i1
ec:3.4.11.5 - aminopeptidase	Arginine and proline metabolism	map00330	8	1	Mj_1_GCCAAT_L005_R1_001_(paired)_trimmed_(paired)_contig_2272
ec:3.1.3.4 - phosphatase	Sphingolipid metabolism, Glycerolipid metabolism, Ether lipid metabolism, Glycerophospholipid metabolism	map00600, map00561, map00565, map00564	5, 12, 5, 16	1	TR71921|c1_g2_i2
ec:1.1.1.100 - reductase	Fatty acid biosynthesis, Biotin metabolism	map00061, map00780	6, 2	1	TR47892|c0_g1_i2
ec:3.1.3.5 - uridine 5'-nucleotidase	Pyrimidine metabolism, Purine metabolism, Nicotinate and nicotinamide metabolism	map00240, map00230, map00760	9, 17, 5	1	Mj_1_GCCAAT_L005_R1_001_(paired)_trimmed_(paired)_contig_16186
ec:4.1.1.35 - decarboxylase	Amino sugar and nucleotide sugar metabolism	map00520	24	1	Mj_1_GCCAAT_L005_R1_001_(paired)_trimmed_(paired)_contig_480
ec:2.7.4.6 - kinase	Pyrimidine metabolism, Drug metabolism - other enzymes, Purine metabolism	map00240, map00983, map00230	9, 9, 17	1	Mj_1_GCCAAT_L005_R1_001_(paired)_trimmed_(paired)_contig_1058
ec:2.4.2.9 - phosphoribosyltransferase	Pyrimidine metabolism	map00240	9	3	TR78565|c2_g1_i4, TR78565|c2_g1_i2, TR78565|c2_g1_i5
ec:1.2.1.5 - dehydrogenase [NAD(P)+]	Glycolysis / Gluconeogenesis, Tyrosine metabolism, Phenylalanine metabolism, beta-Alanine metabolism, Histidine metabolism, Metabolism of xenobiotics by cytochrome P450, Drug metabolism - cytochrome P450	map00010, map00350, map00360, map00410, map00340, map00980, map00982	22, 10, 12, 5, 4, 7, 5	9	TR56409|c0_g1_i2, TR68787|c0_g2_i1, TR68787|c0_g2_i2, Mj_1_GCCAAT_L005_R1_001_(paired)_trimmed_(paired)_contig_8222, TR67594|c2_g1_i3, TR67365|c0_g1_i1, TR67482|c3_g3_i2, TR67482|c3_g3_i4, Mj_1_GCCAAT_L005_R1_001_(paired)_trimmed_(paired)_contig_18843
ec:7.1.2.2 - two-sector ATPase	Oxidative phosphorylation, Photosynthesis	map00190, map00195	4, 2	10	TR50698|c0_g1_i1, TR68785|c0_g2_i1, TR51779|c0_g1_i2, TR50698|c0_g1_i2, TR51779|c0_g1_i1, TR60833|c0_g1_i3, C972548, Mj_1_GCCAAT_L005_R1_001_(paired)_trimmed_(paired)_contig_13159, Mj_1_GCCAAT_L005_R1_001_(paired)_trimmed_(paired)_contig_7433, TR52910|c0_g1_i2
ec:1.1.1.102 - reductase	Sphingolipid metabolism	map00600	5	1	TR74165|c1_g1_i3
ec:5.3.1.9 - isomerase	Amino sugar and nucleotide sugar metabolism, Glycolysis / Gluconeogenesis, Pentose phosphate pathway, Starch and sucrose metabolism	map00520, map00010, map00030, map00500	24, 22, 15, 23	1	TR64820|c0_g1_i1
ec:3.8.1.5 - dehalogenase	Chloroalkane and chloroalkene degradation, Chlorocyclohexane and chlorobenzene degradation	map00625, map00361	3, 3	6	TR74558|c0_g2_i6, TR74558|c0_g2_i7, TR69405|c0_g1_i2, TR74558|c0_g2_i4, TR69405|c0_g1_i3, TR74558|c0_g2_i5
ec:2.5.1.16 - synthase	Glutathione metabolism, Cysteine and methionine metabolism, Arginine and proline metabolism	map00480, map00270, map00330	13, 14, 8	1	TR53419|c0_g1_i2
ec:6.2.1.5 - ligase (ADP-forming)	Carbon fixation pathways in prokaryotes, C5-Branched dibasic acid metabolism, Propanoate metabolism, Citrate cycle (TCA cycle)	map00720, map00660, map00640, map00020	10, 3, 8, 11	1	TR56398|c0_g1_i1
ec:2.5.1.30 - diphosphate synthase	Terpenoid backbone biosynthesis	map00900	12	1	Mj_1_GCCAAT_L005_R1_001_(paired)_trimmed_(paired)_contig_2392
ec:1.14.14.81 - 3',5'-hydroxylase	Flavone and flavonol biosynthesis, Flavonoid biosynthesis	map00944, map00941	2, 9	1	Mj_1_GCCAAT_L005_R1_001_(paired)_trimmed_(paired)_contig_10618
ec:1.13.11.20 - dioxygenase	Taurine and hypotaurine metabolism, Cysteine and methionine metabolism	map00430, map00270	4, 14	1	TR63535|c0_g2_i3
ec:3.5.4.10 - cyclohydrolase	Purine metabolism	map00230	17	2	TR72133|c1_g1_i4, Mj_1_GCCAAT_L005_R1_001_(paired)_trimmed_(paired)_contig_16459
ec:2.7.1.4 - fructokinase (phosphorylating)	Amino sugar and nucleotide sugar metabolism, Fructose and mannose metabolism, Starch and sucrose metabolism	map00520, map00051, map00500	24, 13, 23	1	TR64027|c0_g1_i3
ec:3.1.2.22 - hydrolase	Fatty acid elongation	map00062	3	1	TR74417|c0_g3_i2
ec:2.7.1.67 - 4-kinase	Phosphatidylinositol signaling system, Inositol phosphate metabolism	map04070, map00562	13, 13	1	TR61027|c0_g1_i1
ec:6.3.2.3 - synthase	Glutathione metabolism, Cysteine and methionine metabolism	map00480, map00270	13, 14	1	TR72492|c0_g1_i2
ec:1.1.1.21 - reductase	Glycerolipid metabolism, Fructose and mannose metabolism, Pentose and glucuronate interconversions, Galactose metabolism, Folate biosynthesis	map00561, map00051, map00040, map00052, map00790	12, 13, 11, 18, 8	8	TR57600|c0_g1_i2, TR56901|c0_g1_i1, TR52900|c0_g1_i2, TR56901|c0_g1_i4, TR56901|c0_g1_i3, TR57600|c0_g1_i1, TR57653|c0_g1_i1, TR57600|c0_g1_i4
ec:1.8.5.1 - dehydrogenase (ascorbate)	Glutathione metabolism, Ascorbate and aldarate metabolism	map00480, map00053	13, 12	1	TR56200|c0_g1_i1
ec:1.1.1.195 - dehydrogenase	Phenylpropanoid biosynthesis	map00940	13	1	TR68557|c0_g1_i2
ec:3.1.3.46 - 2-phosphatase	Fructose and mannose metabolism	map00051	13	10	TR78891|c0_g1_i9, TR78891|c0_g1_i8, TR78891|c0_g1_i7, TR78891|c0_g1_i6, TR78891|c0_g1_i5, TR78891|c0_g1_i3, TR78891|c0_g1_i2, Mj_1_GCCAAT_L005_R1_001_(paired)_trimmed_(paired)_contig_1040, TR65744|c0_g1_i6, TR65744|c0_g1_i7
ec:1.14.11.15 - 3beta-dioxygenase	Diterpenoid biosynthesis	map00904	1	5	Mj_1_GCCAAT_L005_R1_001_(paired)_trimmed_(paired)_contig_22382, scaffold1091, Mj_1_GCCAAT_L005_R1_001_(paired)_trimmed_(paired)_contig_1292, TR68834|c2_g1_i1, TR68834|c2_g1_i2
ec:3.2.1.67 - 1,4-alpha-galacturonidase	Pentose and glucuronate interconversions	map00040	11	1	TR70280|c0_g1_i6
ec:1.14.13.122 - oxygenase	Porphyrin and chlorophyll metabolism	map00860	22	1	Mj_1_GCCAAT_L005_R1_001_(paired)_trimmed_(paired)_contig_1409
ec:1.1.1.34 - reductase (NADPH)	Terpenoid backbone biosynthesis	map00900	12	1	TR64461|c0_g1_i2
ec:1.3.1.13 - dehydrogenase (NADP+)	Phenylalanine, tyrosine and tryptophan biosynthesis	map00400	14	3	TR78473|c2_g1_i3, TR78473|c2_g1_i2, TR78473|c2_g1_i1
ec:4.1.1.25 - decarboxylase	Isoquinoline alkaloid biosynthesis, Tyrosine metabolism, Methane metabolism	map00950, map00350, map00680	8, 10, 12	1	TR69452|c1_g1_i2
ec:1.6.5.2 - dehydrogenase (quinone)	Ubiquinone and other terpenoid-quinone biosynthesis	map00130	5	2	TR71233|c0_g1_i1, TR53955|c0_g1_i1
ec:4.1.1.37 - decarboxylase	Porphyrin and chlorophyll metabolism	map00860	22	1	TR62310|c0_g1_i1
ec:3.5.1.4 - acylamidase	Styrene degradation, Aminobenzoate degradation, Phenylalanine metabolism, Arginine and proline metabolism, Tryptophan metabolism	map00643, map00627, map00360, map00330, map00380	1, 7, 12, 8, 11	4	TR71136|c0_g1_i5, TR71136|c1_g1_i2, TR71136|c0_g1_i2, TR71136|c1_g1_i3
ec:2.4.2.8 - phosphoribosyltransferase	Drug metabolism - other enzymes, Purine metabolism	map00983, map00230	9, 17	1	TR54010|c0_g1_i1
ec:4.1.1.28 - decarboxylase	Isoquinoline alkaloid biosynthesis, Tyrosine metabolism, Phenylalanine metabolism, Betalain biosynthesis, Tryptophan metabolism	map00950, map00350, map00360, map00965, map00380	8, 10, 12, 1, 11	1	TR69452|c1_g1_i2
ec:5.4.2.8 - mannose phosphomutase	Amino sugar and nucleotide sugar metabolism, O-Antigen nucleotide sugar biosynthesis, Fructose and mannose metabolism	map00520, map00541, map00051	24, 5, 13	12	TR71113|c0_g1_i1, TR71113|c0_g2_i2, TR71113|c0_g1_i3, TR71117|c2_g2_i2, TR71685|c0_g1_i2, TR71117|c2_g2_i1, Mj_1_GCCAAT_L005_R1_001_(paired)_trimmed_(paired)_contig_11393, TR71690|c0_g1_i3, TR71685|c0_g1_i9, TR71690|c0_g1_i1, TR71113|c0_g1_i6, TR71685|c0_g1_i10
ec:2.5.1.6 - adenosyltransferase	Cysteine and methionine metabolism	map00270	14	1	TR65924|c1_g2_i1
ec:3.2.1.2 - saccharogen amylase	Starch and sucrose metabolism	map00500	23	1	C973522
ec:3.1.3.18 - phosphatase	Glyoxylate and dicarboxylate metabolism	map00630	19	1	Mj_1_GCCAAT_L005_R1_001_(paired)_trimmed_(paired)_contig_11189
ec:2.4.2.17 - phosphoribosyltransferase	Histidine metabolism	map00340	4	1	Mj_1_GCCAAT_L005_R1_001_(paired)_trimmed_(paired)_contig_12655
ec:1.2.3.7 - oxidase	Tryptophan metabolism	map00380	11	1	TR77440|c0_g3_i1
ec:1.3.99.23 - 13,14-reductase	Retinol metabolism	map00830	5	1	TR73969|c0_g1_i3
ec:3.6.1.15 - phosphatase	Thiamine metabolism, Purine metabolism	map00730, map00230	7, 17	87	Mj_1_GCCAAT_L005_R1_001_(paired)_trimmed_(paired)_contig_15257, Mj_1_GCCAAT_L005_R1_001_(paired)_trimmed_(paired)_contig_15455, C974762, TR56153|c0_g1_i1, TR62580|c0_g2_i2, Mj_1_GCCAAT_L005_R1_001_(paired)_trimmed_(paired)_contig_36116, TR62580|c0_g2_i5, Mj_1_GCCAAT_L005_R1_001_(paired)_trimmed_(paired)_contig_12625, TR62843|c1_g1_i2, TR65437|c0_g1_i7, TR59058|c0_g1_i1, TR63650|c0_g2_i5, Mj_1_GCC…
ec:6.2.1.2 - acyl-CoA ligase	Butanoate metabolism	map00650	8	1	C972690
ec:3.2.1.55 - end alpha-L-arabinofuranosidase	Amino sugar and nucleotide sugar metabolism	map00520	24	1	Mj_1_GCCAAT_L005_R1_001_(paired)_trimmed_(paired)_contig_902
ec:5.1.1.7 - epimerase	Lysine biosynthesis	map00300	3	1	TR75094|c4_g3_i2
ec:2.3.1.16 - C-acyltransferase	Ethylbenzene degradation, Benzoate degradation, Valine, leucine and isoleucine degradation, Geraniol degradation, Biosynthesis of unsaturated fatty acids, Fatty acid degradation, alpha-Linolenic acid metabolism, Fatty acid elongation	map00642, map00362, map00280, map00281, map01040, map00071, map00592, map00062	1, 4, 7, 2, 2, 8, 6, 3	1	Mj_1_GCCAAT_L005_R1_001_(paired)_trimmed_(paired)_contig_768
ec:1.2.3.4 - oxidase	Glyoxylate and dicarboxylate metabolism	map00630	19	4	TR46979|c0_g1_i1, Mj_1_GCCAAT_L005_R1_001_(paired)_trimmed_(paired)_contig_2728, TR47677|c0_g1_i1, scaffold14259
ec:2.3.1.150 - 7-O-acetyltransferase	Isoquinoline alkaloid biosynthesis	map00950	8	1	TR75987|c1_g1_i1
ec:4.2.1.2 - hydratase	Carbon fixation pathways in prokaryotes, Pyruvate metabolism, Citrate cycle (TCA cycle)	map00720, map00620, map00020	10, 21, 11	1	TR73210|c0_g1_i1
ec:6.1.1.9 - ligase	Aminoacyl-tRNA biosynthesis	map00970	20	4	Mj_1_GCCAAT_L005_R1_001_(paired)_trimmed_(paired)_contig_3443, TR77268|c0_g1_i4, TR77268|c0_g1_i3, TR77268|c0_g1_i2
ec:1.1.1.282 - dehydrogenase	Phenylalanine, tyrosine and tryptophan biosynthesis	map00400	14	3	TR60786|c0_g1_i1, TR57223|c0_g1_i1, TR76194|c0_g1_i6
ec:6.2.1.3 - ligase	Fatty acid biosynthesis, Fatty acid degradation	map00061, map00071	6, 8	1	TR64463|c0_g1_i1
ec:2.3.1.5 - N-acetyltransferase	Drug metabolism - other enzymes, Caffeine metabolism, Nitrotoluene degradation	map00983, map00232, map00633	9, 3, 1	1	Mj_1_GCCAAT_L005_R1_001_(paired)_trimmed_(paired)_contig_3888
ec:1.2.1.28 - dehydrogenase (NAD+)	Toluene degradation, Xylene degradation, Aminobenzoate degradation	map00623, map00622, map00627	2, 1, 7	1	TR77440|c0_g3_i1
ec:6.1.1.10 - ligase	Aminoacyl-tRNA biosynthesis, Selenocompound metabolism	map00970, map00450	20, 4	1	TR70912|c1_g1_i2
ec:1.1.1.288 - dehydrogenase	Carotenoid biosynthesis	map00906	6	1	TR56963|c0_g2_i1
ec:4.1.2.5 - aldolase	Glycine, serine and threonine metabolism	map00260	13	2	TR66148|c0_g1_i5, TR66711|c0_g1_i2
ec:3.2.1.68 - debranching enzyme	Starch and sucrose metabolism	map00500	23	1	Mj_1_GCCAAT_L005_R1_001_(paired)_trimmed_(paired)_contig_15229
ec:2.8.1.7 - desulfurase	Thiamine metabolism	map00730	7	1	TR54417|c0_g1_i1
ec:1.3.99.5 - 4-dehydrogenase (acceptor)	Steroid degradation	map00984	2	1	Mj_1_GCCAAT_L005_R1_001_(paired)_trimmed_(paired)_contig_10105
ec:2.4.1.21 - synthase (glycosyl-transferring)	Starch and sucrose metabolism	map00500	23	1	Mj_1_GCCAAT_L005_R1_001_(paired)_trimmed_(paired)_contig_10698
ec:6.1.1.21 - ligase	Aminoacyl-tRNA biosynthesis	map00970	20	1	TR68261|c0_g1_i1
ec:1.14.20.6 - synthase	Flavonoid biosynthesis	map00941	9	1	Mj_1_GCCAAT_L005_R1_001_(paired)_trimmed_(paired)_contig_1580
ec:2.4.1.17 - 1-naphthol glucuronyltransferase	Drug metabolism - other enzymes, Steroid hormone biosynthesis, Retinol metabolism, Pentose and glucuronate interconversions, Ascorbate and aldarate metabolism, Metabolism of xenobiotics by cytochrome P450, Drug metabolism - cytochrome P450, Porphyrin and chlorophyll metabolism	map00983, map00140, map00830, map00040, map00053, map00980, map00982, map00860	9, 8, 5, 11, 12, 7, 5, 22	1	TR41170|c0_g1_i1
ec:4.2.1.96 - dehydratase	Folate biosynthesis	map00790	8	1	Mj_1_GCCAAT_L005_R1_001_(paired)_trimmed_(paired)_contig_5694
ec:3.2.1.1 - glycogenase	Starch and sucrose metabolism	map00500	23	6	TR77402|c0_g1_i1, TR75422|c1_g1_i5, TR77640|c0_g1_i2, Mj_1_GCCAAT_L005_R1_001_(paired)_trimmed_(paired)_contig_15229, TR77402|c0_g1_i2, TR74720|c4_g1_i6
ec:2.7.7.27 - adenylyltransferase	Amino sugar and nucleotide sugar metabolism, Starch and sucrose metabolism	map00520, map00500	24, 23	1	Mj_1_GCCAAT_L005_R1_001_(paired)_trimmed_(paired)_contig_2357
ec:2.7.7.9 - uridylyltransferase	Amino sugar and nucleotide sugar metabolism, Glycerolipid metabolism, O-Antigen nucleotide sugar biosynthesis, Starch and sucrose metabolism, Pentose and glucuronate interconversions, Galactose metabolism	map00520, map00561, map00541, map00500, map00040, map00052	24, 12, 5, 23, 11, 18	4	Mj_1_GCCAAT_L005_R1_001_(paired)_trimmed_(paired)_contig_573, TR58806|c0_g1_i2, TR75538|c1_g1_i3, TR75538|c1_g1_i1
ec:1.1.1.37 - dehydrogenase	Carbon fixation pathways in prokaryotes, Pyruvate metabolism, Cysteine and methionine metabolism, Glyoxylate and dicarboxylate metabolism, Methane metabolism, Citrate cycle (TCA cycle), Carbon fixation in photosynthetic organisms	map00720, map00620, map00270, map00630, map00680, map00020, map00710	10, 21, 14, 19, 12, 11, 19	3	Mj_1_GCCAAT_L005_R1_001_(paired)_trimmed_(paired)_contig_1051, TR67315|c5_g3_i1, TR65834|c0_g1_i1
ec:2.6.1.12 - transaminase	Alanine, aspartate and glutamate metabolism	map00250	12	1	TR49718|c0_g1_i1
ec:1.6.5.4 - reductase (NADH)	Ascorbate and aldarate metabolism	map00053	12	2	TR55548|c1_g2_i2, TR55548|c1_g2_i1
ec:2.7.2.8 - kinase	Arginine biosynthesis	map00220	9	1	TR74941|c0_g1_i1
ec:1.3.3.5 - oxidase	Porphyrin and chlorophyll metabolism	map00860	22	1	Mj_1_GCCAAT_L005_R1_001_(paired)_trimmed_(paired)_contig_4992
ec:3.1.3.16 - phosphatase	Th1 and Th2 cell differentiation, T cell receptor signaling pathway, PD-L1 expression and PD-1 checkpoint pathway in cancer	map04658, map04660, map05235	1, 2, 1	1	C939422
ec:1.2.1.68 - dehydrogenase	Phenylpropanoid biosynthesis	map00940	13	1	Mj_1_GCCAAT_L005_R1_001_(paired)_trimmed_(paired)_contig_8222
ec:4.1.1.19 - decarboxylase	Arginine and proline metabolism	map00330	8	1	TR75323|c1_g1_i3
ec:3.2.1.147 - myrosinase	Tryptophan metabolism	map00380	11	1	TR69325|c0_g1_i2
ec:1.14.14.17 - monooxygenase	Steroid biosynthesis, Sesquiterpenoid and triterpenoid biosynthesis	map00100, map00909	3, 1	1	Mj_1_GCCAAT_L005_R1_001_(paired)_trimmed_(paired)_contig_10669
ec:2.7.7.64 - uridylyltransferase	Amino sugar and nucleotide sugar metabolism, Pentose and glucuronate interconversions, Ascorbate and aldarate metabolism, Galactose metabolism	map00520, map00040, map00053, map00052	24, 11, 12, 18	2	Mj_1_GCCAAT_L005_R1_001_(paired)_trimmed_(paired)_contig_573, TR58806|c0_g1_i2
ec:1.14.14.18 - oxygenase (biliverdin-producing)	Porphyrin and chlorophyll metabolism	map00860	22	1	TR61652|c0_g1_i1
ec:1.1.1.65 - 4-dehydrogenase	Vitamin B6 metabolism	map00750	3	5	TR52900|c0_g1_i2, TR61893|c0_g1_i5, C969880, TR58858|c0_g1_i1, TR61893|c0_g1_i3
ec:4.2.1.10 - dehydratase	Phenylalanine, tyrosine and tryptophan biosynthesis	map00400	14	1	TR57223|c0_g1_i1
ec:1.4.3.5 - 5'-phosphate synthase	Vitamin B6 metabolism	map00750	3	1	Mj_1_GCCAAT_L005_R1_001_(paired)_trimmed_(paired)_contig_1006
ec:2.4.99.18 - glycotransferase	Various types of N-glycan biosynthesis, N-Glycan biosynthesis	map00513, map00510	3, 4	1	Mj_1_GCCAAT_L005_R1_001_(paired)_trimmed_(paired)_contig_4720
ec:2.6.1.57 - transaminase	Tropane, piperidine and pyridine alkaloid biosynthesis, Lysine biosynthesis, Isoquinoline alkaloid biosynthesis, Tyrosine metabolism, Cysteine and methionine metabolism, Phenylalanine metabolism, Novobiocin biosynthesis, Phenylalanine, tyrosine and tryptophan biosynthesis	map00960, map00300, map00950, map00350, map00270, map00360, map00401, map00400	6, 3, 8, 10, 14, 12, 5, 14	3	TR51632|c0_g1_i1, TR70672|c0_g2_i2, TR69989|c1_g1_i3
ec:1.1.1.79 - reductase (NADP+)	Pyruvate metabolism, Glyoxylate and dicarboxylate metabolism	map00620, map00630	21, 19	3	TR65456|c0_g1_i2, TR65650|c1_g1_i2, TR65650|c1_g1_i1
ec:2.7.7.75 - adenylyltransferase	Folate biosynthesis	map00790	8	2	TR75217|c0_g1_i4, TR75217|c0_g1_i5
ec:3.1.3.64 - inositol-1,3-bisphosphate 3-phosphatase	Phosphatidylinositol signaling system, Inositol phosphate metabolism	map04070, map00562	13, 13	1	TR76404|c2_g1_i1
ec:6.3.5.7 - synthase (glutamine-hydrolysing)	Aminoacyl-tRNA biosynthesis	map00970	20	1	Mj_1_GCCAAT_L005_R1_001_(paired)_trimmed_(paired)_contig_2953
ec:2.7.1.32 - kinase	Glycerophospholipid metabolism	map00564	16	1	TR73290|c1_g2_i1
ec:2.6.1.9 - transaminase	Tropane, piperidine and pyridine alkaloid biosynthesis, Tyrosine metabolism, Phenylalanine metabolism, Histidine metabolism, Novobiocin biosynthesis, Phenylalanine, tyrosine and tryptophan biosynthesis	map00960, map00350, map00360, map00340, map00401, map00400	6, 10, 12, 4, 5, 14	1	TR69989|c1_g1_i3
ec:1.8.1.9 - reductase	Selenocompound metabolism	map00450	4	1	Mj_1_GCCAAT_L005_R1_001_(paired)_trimmed_(paired)_contig_390
ec:1.7.1.1 - reductase (NADH)	Nitrogen metabolism	map00910	7	3	TR53991|c0_g1_i1, Mj_1_GCCAAT_L005_R1_001_(paired)_trimmed_(paired)_contig_6489, TR74667|c0_g1_i2
ec:2.7.6.1 - diphosphokinase	Pentose phosphate pathway, Purine metabolism	map00030, map00230	15, 17	1	TR71021|c1_g1_i1
ec:2.3.1.30 - O-acetyltransferase	Biosynthesis of various secondary metabolites - part 3, Cysteine and methionine metabolism, Sulfur metabolism	map00997, map00270, map00920	1, 14, 7	1	TR61723|c0_g1_i1
ec:6.1.1.19 - ligase	Aminoacyl-tRNA biosynthesis	map00970	20	2	TR74071|c0_g1_i1, Mj_1_GCCAAT_L005_R1_001_(paired)_trimmed_(paired)_contig_3917
ec:1.7.1.3 - reductase (NADPH)	Nitrogen metabolism	map00910	7	1	Mj_1_GCCAAT_L005_R1_001_(paired)_trimmed_(paired)_contig_6489
ec:1.1.1.25 - dehydrogenase	Phenylalanine, tyrosine and tryptophan biosynthesis	map00400	14	1	TR57223|c0_g1_i1
ec:3.2.1.48 - alpha-glucosidase	Starch and sucrose metabolism	map00500	23	1	C972144
ec:3.5.1.10 - deformylase	One carbon pool by folate, Glyoxylate and dicarboxylate metabolism	map00670, map00630	5, 19	3	TR66809|c0_g3_i1, TR66809|c0_g3_i6, TR66809|c0_g3_i3
ec:6.1.1.3 - ligase	Aminoacyl-tRNA biosynthesis	map00970	20	5	scaffold11158, TR74703|c1_g1_i2, TR75771|c0_g1_i5, TR75771|c0_g1_i10, Mj_1_GCCAAT_L005_R1_001_(paired)_trimmed_(paired)_contig_4832
ec:3.2.1.106 - glucosidase	N-Glycan biosynthesis	map00510	4	1	TR78546|c0_g1_i1
ec:2.6.1.2 - transaminase	Arginine biosynthesis, Carbon fixation in photosynthetic organisms, Alanine, aspartate and glutamate metabolism	map00220, map00710, map00250	9, 19, 12	2	TR49718|c0_g1_i1, TR49718|c0_g1_i2
ec:1.17.1.8 - reductase	Lysine biosynthesis, Monobactam biosynthesis	map00300, map00261	3, 2	1	TR66822|c0_g1_i11
ec:2.7.1.48 - kinase	Pyrimidine metabolism, Drug metabolism - other enzymes	map00240, map00983	9, 9	4	TR78565|c2_g1_i4, TR78565|c2_g1_i2, TR78595|c0_g1_i1, TR78565|c2_g1_i5
ec:3.1.3.36 - 5-phosphatase	Phosphatidylinositol signaling system, Inositol phosphate metabolism	map04070, map00562	13, 13	1	TR57660|c0_g1_i1
ec:3.1.3.57 - 1-phosphatase	Phosphatidylinositol signaling system, Inositol phosphate metabolism	map04070, map00562	13, 13	1	TR73341|c0_g1_i5
ec:3.1.1.1 - ali-esterase	Drug metabolism - other enzymes	map00983	9	47	TR60092|c0_g1_i1, TR65932|c1_g1_i2, TR79228|c1_g4_i5, TR60092|c0_g1_i2, TR66432|c0_g1_i2, TR78621|c1_g5_i3, TR79228|c1_g4_i6, TR57552|c0_g2_i2, TR66432|c0_g1_i3, TR66432|c0_g1_i4, TR60092|c0_g1_i5, Mj_1_GCCAAT_L005_R1_001_(paired)_trimmed_(paired)_contig_10101, TR65689|c0_g2_i11, Mj_1_GCCAAT_L005_R1_001_(paired)_trimmed_(paired)_contig_3443, Mj_1_GCCAAT_L005_R1_001_(paired)_trimmed_(paired)_conti…
ec:2.3.1.41 - synthase I	Fatty acid biosynthesis, Biotin metabolism	map00061, map00780	6, 2	1	Mj_1_GCCAAT_L005_R1_001_(paired)_trimmed_(paired)_contig_17661
ec:5.3.1.6 - isomerase	Pentose phosphate pathway, Fructose and mannose metabolism, Carbon fixation in photosynthetic organisms	map00030, map00051, map00710	15, 13, 19	1	Mj_1_GCCAAT_L005_R1_001_(paired)_trimmed_(paired)_contig_3036
ec:1.2.1.70 - reductase	Porphyrin and chlorophyll metabolism	map00860	22	2	TR72450|c0_g1_i1, Mj_1_GCCAAT_L005_R1_001_(paired)_trimmed_(paired)_contig_450
ec:6.3.4.16 - synthase (ammonia)	Arginine biosynthesis, Nitrogen metabolism, Alanine, aspartate and glutamate metabolism	map00220, map00910, map00250	9, 7, 12	1	scaffold13867
ec:3.1.4.46 - phosphodiesterase	Glycerophospholipid metabolism	map00564	16	1	TR79873|c0_g2_i1
ec:2.7.7.2 - synthase	Riboflavin metabolism	map00740	4	1	TR71435|c0_g1_i1
ec:2.3.1.170 - synthase	Flavonoid biosynthesis	map00941	9	1	C962152

## Sheet: Seqs_mapped_to_phenylpropanoids
Table S15 KEGG pathway mapping of transcript modules TransM4 and TransM9 sharing high correlation coefficient (PCC > 0.7) with the metabolite module MetM7 containing rutin.
Enzyme	Pathway	Pathway ID	#Enzs in Pathway	#Seqs in Pathway	Seqs									Seqs	Enzyme	FPKM_Young_leaf	FPKM_Mature_Leaf	FPKM_Young_Stem	FPKM_Mature_Stem	FPKM_Bark	FPKM_Central_Cylinder	FPKM_Inflorescence
ec:1.14.14.81 - 3',5'-hydroxylase	Flavone and flavonol biosynthesis, Flavonoid biosynthesis	map00944, map00941	2, 9	1	Mj_1_GCCAAT_L005_R1_001_(paired)_trimmed_(paired)_contig_10618									TR68557|c0_g1_i2	CAD	12.68	7.3	4.02	2.58	5.1	3.61	6.09
ec:1.14.14.82 - 3'-monooxygenase	Flavone and flavonol biosynthesis, Flavonoid biosynthesis	map00944, map00941	2, 9	4	TR56301|c0_g1_i2, TR68133|c0_g2_i1, TR54391|c0_g1_i3, TR56301|c0_g1_i4									TR66359|c0_g1_i1	DFR	18.79	12.43	7.11	4.09	6.34	4.96	6.64
ec:1.1.1.219 - 4-reductase	Flavonoid biosynthesis	map00941	9	1	TR66359|c0_g1_i1									Mj_1_GCCAAT_L005_R1_001_(paired)_trimmed_(paired)_contig_16365	PER	2.09	6.21	8.19	12.95	6.29	10.74	11.5
ec:1.14.11.9 - 3-dioxygenase	Flavonoid biosynthesis	map00941	9	1	TR58415|c0_g1_i1									TR58415|c0_g1_i1	F3H	292.1	206.01	138.55	0.62	0	2.53	48.79
ec:1.14.20.6 - synthase	Flavonoid biosynthesis	map00941	9	1	Mj_1_GCCAAT_L005_R1_001_(paired)_trimmed_(paired)_contig_1580									Mj_1_GCCAAT_L005_R1_001_(paired)_trimmed_(paired)_contig_10618	F3'5'H	15.72	142.9	5.35	0.93	3.49	1.42	25.86
ec:2.3.1.170 - synthase	Flavonoid biosynthesis	map00941	9	1	C962152									TR56301|c0_g1_i2	F3'H-1	5.87	5.5	1.67	0	0	0	0
ec:5.5.1.6 - isomerase	Flavonoid biosynthesis	map00941	9	1	TR64329|c0_g1_i1									TR68133|c0_g2_i1	F3'H-2	2.48	19.92	6.94	1.32	0.17	0.37	8.45
ec:1.1.1.195 - dehydrogenase	Phenylpropanoid biosynthesis	map00940	13	1	TR68557|c0_g1_i2									TR54391|c0_g1_i3	F3'H-3	6.47	8.5	3.1	0.08	0	0.06	0.1
ec:1.11.1.7 - lactoperoxidase	Phenylpropanoid biosynthesis	map00940	13	1	Mj_1_GCCAAT_L005_R1_001_(paired)_trimmed_(paired)_contig_16365									TR56301|c0_g1_i4	F3'H-4	5.05	4.18	2.16	0	0.34	0	0.23
ec:1.2.1.44 - reductase	Phenylpropanoid biosynthesis	map00940	13	1	TR66359|c0_g1_i1									Mj_1_GCCAAT_L005_R1_001_(paired)_trimmed_(paired)_contig_1580	FLS	26.66	93	23.07	45.43	44.45	18.39	10.76
ec:1.2.1.68 - dehydrogenase	Phenylpropanoid biosynthesis	map00940	13	1	Mj_1_GCCAAT_L005_R1_001_(paired)_trimmed_(paired)_contig_8222									TR66359|c0_g1_i1	CCR	18.79	12.43	7.11	4.09	6.34	4.96	6.64
ec:2.1.1.146 - O-methyltransferase	Phenylpropanoid biosynthesis	map00940	13	1	TR62826|c0_g2_i1									Mj_1_GCCAAT_L005_R1_001_(paired)_trimmed_(paired)_contig_8222	CALDH	3.62	7.66	2.69	2.82	6.43	0.58	7.73
ec:2.1.1.68 - O-methyltransferase	Phenylpropanoid biosynthesis	map00940	13	1	C966066									Mj_1_GCCAAT_L005_R1_001_(paired)_trimmed_(paired)_contig_8447	CcAOMT	9.13	7.12	5	4.04	1.9	3.76	5.02
ec:2.4.1.128 - glucosyltransferase	Phenylpropanoid biosynthesis	map00940	13	1	Mj_1_GCCAAT_L005_R1_001_(paired)_trimmed_(paired)_contig_36930									C966066	COMT	3.77	12.47	0.67	0.57	1.6	0.16	5.91
ec:3.2.1.21 - gentiobiase	Phenylpropanoid biosynthesis, Cyanoamino acid metabolism, Starch and sucrose metabolism	map00940, map00460, map00500	13, 5, 23	1	Mj_1_GCCAAT_L005_R1_001_(paired)_trimmed_(paired)_contig_1981									C962152	DCHS	1.02	10.9	0	0.4	0.38	0.38	4.61
ec:4.3.1.24 - ammonia-lyase	Phenylpropanoid biosynthesis, Phenylalanine metabolism	map00940, map00360	13, 12	1	Mj_1_GCCAAT_L005_R1_001_(paired)_trimmed_(paired)_contig_2863									Mj_1_GCCAAT_L005_R1_001_(paired)_trimmed_(paired)_contig_2863	PAL/PTAL	9.65	41.45	0.08	0.22	0.21	0.46	0.48
ec:4.3.1.25 - ammonia-lyase	Phenylpropanoid biosynthesis, Phenylalanine metabolism	map00940, map00360	13, 12	1	Mj_1_GCCAAT_L005_R1_001_(paired)_trimmed_(paired)_contig_2863									TR64329|c0_g1_i1	CHI	11.24	13.39	7.28	4.32	3.23	2.61	6.38
ec:1.14.14.96 - 3'-monooxygenase	Stilbenoid, diarylheptanoid and gingerol biosynthesis, Phenylpropanoid biosynthesis, Flavonoid biosynthesis	map00945, map00940, map00941	2, 13, 9	3	TR56301|c0_g1_i2, TR56301|c0_g1_i4, TR54391|c0_g1_i3									Mj_1_GCCAAT_L005_R1_001_(paired)_trimmed_(paired)_contig_3698	4CL	8.44	7.28	3.84	1.63	2.01	1.09	1.91
ec:2.1.1.104 - O-methyltransferase	Stilbenoid, diarylheptanoid and gingerol biosynthesis, Phenylpropanoid biosynthesis, Flavonoid biosynthesis	map00945, map00940, map00941	2, 13, 9	1	Mj_1_GCCAAT_L005_R1_001_(paired)_trimmed_(paired)_contig_8447
ec:6.2.1.12 - ligase	Ubiquinone and other terpenoid-quinone biosynthesis, Phenylpropanoid biosynthesis	map00130, map00940	5, 13	1	Mj_1_GCCAAT_L005_R1_001_(paired)_trimmed_(paired)_contig_3698
