# Supplementary material for: Gene-Metabolite Network Analysis Revealed Tissue-Specific Accumulation of Therapeutic Metabolites in Mallotus japonicus
Source: Int J Mol Sci. 2021 Aug 17;22(16):8835. doi: 10.3390/ijms22168835 (PMC8396295; doi:10.3390/ijms22168835)
Supplement: Supplementary file 1 [file ijms-22-08835-s001.zip › Supplementary_Table S16_List_of_GTs_and_OMTs_used_for_phylogeny with legend_Megha.xlsx]

## Sheet: GTs
Table S16 List of transcripts, annotated as glucosyltransferases (GTs) and O-methyltransferases (OMTs), involved in the biosynthesis of bergenin in Mallotus japonicus.
Sequence_name	Name in phylogenetic tree	WGCNA_Cluster	FPKM_Young_Leaf	FPKM_Mature_Leaf	FPKM_Young_Stem	FPKM_Mature_Stem	FPKM_Bark	FPKM_Central_Cylinder	FPKM_Inflorescence
TR79653|c2_g2_i6	Mj_GT1	TransM8	1.66	3.91	7.13	0.62	0.73	3.37	1.83
TR79162|c1_g3_i8	Mj_GT2	TransM8	2.95	4.65	5.55	1.17	1.54	2.29	3.49
TR71722|c0_g2_i2	Mj_GT3	TransM10	1.2	0.15	8.74	17.8	9.83	7.21	2.76
TR72761|c4_g2_i1	Mj_GT4	TransM15	1.24	0.59	1.09	3.61	6.5	1.84	3.57
Mj_1_GCCAAT_L005_R1_001_(paired)_trimmed_(paired)_contig_4538	Mj_GT5	TransM10	5.86	6.15	4.23	1.2	4.52	7.13	4.66
TR78386|c0_g2_i5	Mj_GT6	TransM8	1.1	6.02	6.61	0.16	0.15	1.34	1.88
TR78047|c0_g1_i8	Mj_GT7	TransM8	1.61	5.19	5.89	0	0	1.69	2.03
TR78386|c0_g2_i2	Mj_GT8	TransM8	2.6	9.8	9.3	0.54	0.17	2.39	2.01
TR62416|c0_g1_i1	Mj_GT9	TransM8	4.68	5.19	10.55	1.45	3.41	0.29	2.05
Mj_1_GCCAAT_L005_R1_001_(paired)_trimmed_(paired)_contig_38569	Mj_GT10	TransM10	0.6	0.09	7.14	17.54	8.34	5.75	2.16
TR71127|c0_g1_i1	Mj_GT11	TransM10	1.54	0.23	14.32	66.08	25.2	12.82	4.01
scaffold13584	Mj_GT12	TransM15	1.54	1.2	1.25	3.53	7.53	1.4	3.62
TR73362|c0_g1_i3	Mj_GT13	TransM8	1.64	0.39	7.84	1.3	0.92	0.11	3.95
TR57059|c0_g1_i1	Mj_GT14	TransM10	0.61	0.7	0.07	5.95	2.12	0.68	2.3
scaffold12637	Mj_GT15	TransM10	0.71	0.49	0.38	7.62	2.43	0.65	2.49
TR78386|c0_g2_i3	Mj_GT16	TransM8	14.49	56.72	59.3	3.9	3.35	39.18	14.98
C909995	Mj_GT17	TransM15	0	0	0	3.02	5.28	0	0
scaffold11393	Mj_GT18	TransM8	11.95	4.14	20.38	0	0	0	3.29
TR57424|c0_g2_i1	Mj_GT19	TransM8	18.48	6.15	33.15	0.1	0	0.07	5.68
TR59607|c0_g1_i2	Mj_GT20	TransM8	17.97	5.96	29.46	0	0.12	0.27	6.26
TR59395|c1_g1_i5	Mj_GT21	TransM10	6.19	6.28	3.58	2.1	5.17	5.42	6.71
TR59395|c1_g1_i4	Mj_GT22	TransM10	8.07	5.54	4.44	1.37	5.16	5.75	7.33
TR74467|c0_g1_i1	Mj_GT23	TransM10	9.53	9.45	6.86	3.39	6.74	8.78	9.49
TR78101|c0_g2_i3	Mj_GT24	TransM8	10.59	8.4	13.78	6.61	6.51	7.78	10.79
TR79653|c2_g2_i8	Mj_GT25	TransM8	1.39	2.65	5.27	0.58	1.18	1.55	1.92
TR72127|c0_g2_i3	Mj_GT26	TransM8	7.67	9.26	14.54	9.54	7.91	5.44	9.6
Mj_1_GCCAAT_L005_R1_001_(paired)_trimmed_(paired)_contig_15379	Mj_GT27	TransM15	0	0.06	0	3.98	6.25	0.36	0.95
Mj_1_GCCAAT_L005_R1_001_(paired)_trimmed_(paired)_contig_14885	Mj_GT28	TransM8	1.26	0.85	18.15	2.29	1.89	7.6	4.84
TR60804|c1_g1_i1	Mj_GT29	TransM8	1.4	0.32	23.15	2.12	1.5	7.56	5.84
TR71322|c0_g1_i1	Mj_GT30	TransM10	5.04	6.94	4.96	12.86	5.41	10.44	9.15
TR78141|c0_g3_i4	Mj_GT31	TransM8	2.52	1	13.82	0.33	1.25	2.09	9.29
TR71260|c0_g1_i3	Mj_GT32	TransM8	5.16	10.07	26.17	3.46	4.44	11.65	10.16
TR75596|c2_g7_i1	Mj_GT33	TransM8	5.12	17.18	15.35	1.1	1.73	2.83	4.81

## Sheet: OMTs
Table S16 List of transcripts, annotated as glucosyltransferases (GTs) and O-methyltransferases (OMTs), involved in the biosynthesis of bergenin in Mallotus japonicus.
Sequence_name	Name in phylogenetic tree	WGCNA_Cluster	FPKM_Young_Leaf	FPKM_Mature_Leaf	FPKM_Young_Stem	FPKM_Mature_Stem	FPKM_Bark	FPKM_Central_Cylinder	FPKM_Inflorescence
TR54884|c0_g1_i2	Mj_OMT1	TransM10	7.42	6.92	7.4	18.9	9.33	7.64	10.75
TR77639|c1_g1_i3	Mj_OMT2	TransM8	3.18	3.17	15.45	8.12	11.99	5.99	15.27
Mj_1_GCCAAT_L005_R1_001_(paired)_trimmed_(paired)_contig_41700	Mj_OMT3	TransM8	1.72	0.97	11.24	1.12	0.35	0.35	1.47
TR47786|c0_g1_i1	Mj_OMT4	TransM8	0.17	0.87	8.2	0	0	0	3.52
TR46258|c0_g1_i1	Mj_OMT5	TransM15	0	0.56	0.87	4.22	15.24	0.33	0
TR78036|c1_g2_i4	Mj_OMT6	TransM15	1.64	1.39	1.66	3.65	5.48	1.38	1.36
TR73260|c1_g1_i3	Mj_OMT7	TransM15	1.02	6.2	4.38	43.64	50.67	2.73	5.85
Mj_1_GCCAAT_L005_R1_001_(paired)_trimmed_(paired)_contig_3266	Mj_OMT8	TransM8	146.5	85.16	974.21	1.74	0.35	2.44	20.19
Mj_1_GCCAAT_L005_R1_001_(paired)_trimmed_(paired)_contig_3719	Mj_OMT9	TransM15	10.58	14.23	11.03	13.44	23.11	2.07	4.03
Mj_1_GCCAAT_L005_R1_001_(paired)_trimmed_(paired)_contig_40130	Mj_OMT10	TransM8	0.25	0.08	10.26	0.8	0.63	0	0.99
Mj_1_GCCAAT_L005_R1_001_(paired)_trimmed_(paired)_contig_854	Mj_OMT11	TransM8	2.93	2.51	9.84	3.15	9.03	2.7	9.28
