# Supplementary material for: Gene-Metabolite Network Analysis Revealed Tissue-Specific Accumulation of Therapeutic Metabolites in Mallotus japonicus
Source: Int J Mol Sci. 2021 Aug 17;22(16):8835. doi: 10.3390/ijms22168835 (PMC8396295; doi:10.3390/ijms22168835)
Supplement: Supplementary file 1 [file ijms-22-08835-s001.zip › Supplementary_Table S17_Accession_number_of_functionally_characterized_GTs_and_OMTs with legend.xlsx]

## Sheet: Functionally_characterized_UGTs
Table S17 Accession number of the functionally characterized glucosyltransferases (GTs) and O-methyltransferases (OMTs) used for phylogenetic analysis.
Name in phylogenetic tree	Accession number
FeCGTa	BAP90360
FeCGTb	BAP90361
OsCGT	CAQ77160
Zm_CGT	NP_001132650
TcCGT1	QCZ42162
GgCGT	QGL05036
MiCGT	ALD83754
FcCGT	BBA18062
CuCGT	BBA18063
GtUF6CGT1	BAQ19550
UGT84A57	BBI55602
Pf5GlcT	BAA36421
PiUGT43	AMQ26115
PhF3GlcT	AAD55985
VvGT1	AAB81683
FaGT7	ABB92749
UGT73A4	AAS94329
Dc_UGT2_Animal	ATL15304
IroB	CAE55724
UrdGT2	AAF00209

## Sheet: Functionally_characterized_OMTs
Table S17 Accession number of the functionally characterized glucosyltransferases (GTs) and O-methyltransferases (OMTs) used for phylogenetic analysis.
Name in phylogenetic tree	Accession number
AtCCoAOMT1	O49499
AtCCoAOMT7	Q9C5D7
AtOMT1	Q9FK25
CaOMT1	P59049
CaOMT2	Q42653
CdFOMT1	BAU51791
CdFOMT3	BAU51792
CdFOMT4	BAU51793
CdFOMT5	BAU51794
CdFOMT6	BAU51795
CrCOMT1	Q8W013
CrOMT2	Q8GSN1
CrOMT6	Q6VCW3
HvOMT1	Q43771
McCCoAOMT	O65162
McPFOMT	Q6YI95
MpOMT1A	Q6VMW2
MpOMT1B	Q6VMW1
MpOMT2	Q6VMW0
MpOMT3	Q6VMV9
MpOMT4	Q6VMV8
MsCCoAOMT	Q40313
MsCOMT1	P28002
NtCCoAOMT1	O24144
NtCCoAOMT2	O24149
NtCCoAOMT3	O24150
NtCCoAOMT4	O24151
NtCCoAOMT5	O04899
NtCCoAOMT6	Q42945
ObF8OMT-1	AGQ21572
ObFOMT1	AFU50295
ObFOMT2	AFU50296
ObFOMT3	AFU50297
ObFOMT4	AFU50298
ObFOMT5	AFU50299
ObFOMT6	AFU50300
ObPFOMT-1	AGQ21571
OsNOMT	Q0IP69
OsOMT1	Q6ZD89
OsOMT15	Q9XGP7
OsOMT17	Q7F8T6
PkHOMT1	Q43046
PkHOMT3	Q43047
PtCCoAOMT	Q43095
PtCCoAOMT1	O65862
PtCCoAOMT2	O65922
PtOMT1	Q00763
PtOMT2	Q41086
SbOMT1	ADZ76434
SbOMT3	A8QW53
ShMOMT1	ADZ76433
ShMOMT2	ADZ76434
ShMOMT3	AGK26768
SlAnthOMT	NP_001289828
SlCCoAOMT	NP_001234801
SlMOMT4	AIN36846
TaOMT1	Q84N28
TaOMT2	Q38J50
VpOMT4	ADZ76153
VpOMT5	ADZ76154
VvAOMT	C7AE94
VvCCoAOMT	Q43095
VvROMT	B6VJS4
ZmCCoAOMT1	Q9XGD6
ZmCCoAOMT2	Q9XGD5
ZmOMT1	Q6VWG3
